# Supplementary material
Source: PubMed Central journal article supplement (PMC6742481)
Supplement: NIHMS1048550-supplement-CIF_31.pdf [file NIHMS1048550-supplement-CIF_31.pdf]

data\_PIDAsidepdt

```
_audit_creation_method      'SHELXL-2014/7'
_shelx_SHELXL_version_number  '2014/7'
_chemical_name_systematic    ?
_chemical_name_common        PIDAsidepdt
_chemical_melting_point      ?
_chemical_formula_moiety     'C H2 Cl2, C26 H30 N2 O'
_chemical_formula_sum        'C27 H32 Cl2 N2 O'
_chemical_formula_weight     471.44
```

loop\_

```
_atom_type_symbol
_atom_type_description
_atom_type_scatter_dispersion_real
_atom_type_scatter_dispersion_imag
_atom_type_scatter_source
'C' 'C' 0.0181 0.0091
'International Tables Vol C Tables 4.2.6.8 and 6.1.1.4'
'H' 'H' 0.0000 0.0000
'International Tables Vol C Tables 4.2.6.8 and 6.1.1.4'
'Cl' 'Cl' 0.3639 0.7018
'International Tables Vol C Tables 4.2.6.8 and 6.1.1.4'
'N' 'N' 0.0311 0.0180
'International Tables Vol C Tables 4.2.6.8 and 6.1.1.4'
'O' 'O' 0.0492 0.0322
'International Tables Vol C Tables 4.2.6.8 and 6.1.1.4'
```

```
_space_group_crystal_system  triclinic
_space_group_IT_number        2
_space_group_name_H-M_alt     'P -1'
_space_group_name_Hall        '-P 1'
```

\_shelx\_space\_group\_comment

;

The symmetry employed for this shelxl refinement is uniquely defined by the following loop, which should always be used as a source of symmetry information in preference to the above space-group names. They are only intended as comments.

;

loop\_

\_space\_group\_symop\_operation\_xyz

'x, y, z'

'-x, -y, -z'

|                               |              |
|-------------------------------|--------------|
| _cell_length_a                | 9.92760(10)  |
| _cell_length_b                | 10.75250(10) |
| _cell_length_c                | 12.95480(10) |
| _cell_angle_alpha             | 99.7130(10)  |
| _cell_angle_beta              | 104.8560(10) |
| _cell_angle_gamma             | 110.2590(10) |
| _cell_volume                  | 1202.34(2)   |
| _cell_formula_units_Z         | 2            |
| _cell_measurement_temperature | 100(2)       |
| _cell_measurement_reflns_used | 48794        |
| _cell_measurement_theta_min   | 3.6650       |
| _cell_measurement_theta_max   | 78.4420      |

|                                 |            |
|---------------------------------|------------|
| _exptl_crystal_description      | block      |
| _exptl_crystal_colour           | colourless |
| _exptl_crystal_density_meas     | ?          |
| _exptl_crystal_density_method   | ?          |
| _exptl_crystal_density_diffn    | 1.302      |
| _exptl_crystal_F_000            | 500        |
| _exptl_transmission_factor_min  | ?          |
| _exptl_transmission_factor_max  | ?          |
| _exptl_crystal_size_max         | 0.220      |
| _exptl_crystal_size_mid         | 0.200      |
| _exptl_crystal_size_min         | 0.190      |
| _exptl_absorpt_coefficient_mu   | 2.591      |
| _shelx_estimated_absorpt_T_min  | 0.599      |
| _shelx_estimated_absorpt_T_max  | 0.639      |
| _exptl_absorpt_correction_type  | multi-scan |
| _exptl_absorpt_correction_T_min | 0.83742    |
| _exptl_absorpt_correction_T_max | 1.00000    |
| _exptl_absorpt_process_details  |            |

;

Olex2 1.2-ac3

(compiled 2017.08.10 svn.r3458 for OlexSys, GUI svn.r5381)

```

;
_exptl_absorpt_special_details ?
_diffn_ambient_temperature 100(2)
_diffn_radiation_wavelength 1.54184
_diffn_radiation_type CuK $\alpha$ 
_diffn_source 'Rotating-anode X-ray tube'
_diffn_measurement_device_type 'ROD, Synergy Custom DW system, Pilatus 200K'
_diffn_measurement_method '\Ww scans'
_diffn_detector_area_resol_mean ?
_diffn_reflns_number 58641
_diffn_reflns_av_unetl/netl 0.0139
_diffn_reflns_av_R_equivalents 0.0411
_diffn_reflns_limit_h_min -12
_diffn_reflns_limit_h_max 12
_diffn_reflns_limit_k_min -13
_diffn_reflns_limit_k_max 13
_diffn_reflns_limit_l_min -16
_diffn_reflns_limit_l_max 16
_diffn_reflns_theta_min 3.681
_diffn_reflns_theta_max 74.493
_diffn_reflns_theta_full 74.000
_diffn_measured_fraction_theta_max 0.997
_diffn_measured_fraction_theta_full 0.997
_diffn_reflns_Laue_measured_fraction_max 0.997
_diffn_reflns_Laue_measured_fraction_full 0.997
_diffn_reflns_point_group_measured_fraction_max 0.997
_diffn_reflns_point_group_measured_fraction_full 0.997
_reflns_number_total 4913
_reflns_number_gt 4845
_reflns_threshold_expression '| > 2 $\sigma$ (I)'
_reflns_Friedel_coverage 0.000
_reflns_Friedel_fraction_max .
_reflns_Friedel_fraction_full .

```

```
_reflns_special_details
```

```
;
```

Reflections were merged by SHELXL according to the crystal class for the calculation of statistics and refinement.

\_reflns\_Friedel\_fraction is defined as the number of unique Friedel pairs measured divided by the number that would be

## CIF 31

possible theoretically, ignoring centric projections and systematic absences.

;

```

_computing_data_collection      'CrysAlisPro 1.171.39.46e (Rigaku OD, 2018)'
_computing_cell_refinement      'CrysAlisPro 1.171.39.46e (Rigaku OD, 2018)'
_computing_data_reduction       'CrysAlisPro 1.171.39.46e (Rigaku OD, 2018)'
_computing_structure_solution    'ShelXT (Sheldrick, 2015)'
_computing_structure_refinement 'SHELXL-2014/7 (Sheldrick, 2014)'
_computing_molecular_graphics    'Olex2 (Dolomanov et al., 2009)'
_computing_publication_material 'Olex2 (Dolomanov et al., 2009)'
_refine_special_details          ?
_refine_ls_structure_factor_coef  Fsqd
_refine_ls_matrix_type           full
_refine_ls_weighting_scheme      calc
_refine_ls_weighting_details
'w=1/[ws*(Fo2)2+(0.0567P)2+0.5887P] where P=(Fo2+2Fc2)/3'
_atom_sites_solution_primary     dual
_atom_sites_solution_secondary   ?
_atom_sites_solution_hydrogens   mixed
_refine_ls_hydrogen_treatment    mixed
_refine_ls_extinction_method     none
_refine_ls_extinction_coef       .
_refine_ls_number_reflns         4913
_refine_ls_number_parameters      298
_refine_ls_number_restraints      0
_refine_ls_R_factor_all           0.0397
_refine_ls_R_factor_gt           0.0395
_refine_ls_wR_factor_ref          0.1063
_refine_ls_wR_factor_gt          0.1062
_refine_ls_goodness_of_fit_ref    1.054
_refine_ls_restrained_S_all       1.054
_refine_ls_shift/su_max           0.000
_refine_ls_shift/su_mean          0.000

```

loop\_

```

_atom_site_label
_atom_site_type_symbol
_atom_site_fract_x
_atom_site_fract_y
_atom_site_fract_z

```

## CIF 31

\_atom\_site\_U\_iso\_or\_equiv  
\_atom\_site\_adp\_type  
\_atom\_site\_occupancy  
\_atom\_site\_site\_symmetry\_order  
\_atom\_site\_calc\_flag  
\_atom\_site\_refinement\_flags\_posn  
\_atom\_site\_refinement\_flags\_adp  
\_atom\_site\_refinement\_flags\_occupancy  
\_atom\_site\_disorder\_assembly  
\_atom\_site\_disorder\_group  
C1 C -0.10723(18) 0.21977(17) 0.52250(13) 0.0328(3) Uani 1 1 d . . . . .  
H1A H -0.1305 0.1704 0.5744 0.039 Uiso 1 1 calc R U . . .  
H1B H -0.1726 0.1850 0.4469 0.039 Uiso 1 1 calc R U . . .  
C2 C 0.01620(16) 0.33689(15) 0.55546(12) 0.0261(3) Uani 1 1 d . . . . .  
H2A H 0.0338 0.3818 0.5000 0.031 Uiso 1 1 calc R U . . .  
C3 C 0.13256(16) 0.40730(14) 0.67174(11) 0.0229(3) Uani 1 1 d . . . . .  
C4 C 0.07660(17) 0.34098(16) 0.75798(12) 0.0289(3) Uani 1 1 d . . . . .  
H4A H 0.0527 0.2419 0.7360 0.043 Uiso 1 1 calc R U . . .  
H4B H -0.0152 0.3541 0.7614 0.043 Uiso 1 1 calc R U . . .  
H4C H 0.1568 0.3848 0.8314 0.043 Uiso 1 1 calc R U . . .  
C5 C 0.15362(17) 0.55935(15) 0.70118(12) 0.0265(3) Uani 1 1 d . . . . .  
H5A H 0.1795 0.6000 0.6421 0.032 Uiso 1 1 calc R U . . .  
H5B H 0.0560 0.5629 0.7034 0.032 Uiso 1 1 calc R U . . .  
C6 C 0.27834(17) 0.64551(15) 0.81274(12) 0.0270(3) Uani 1 1 d . . . . .  
H6A H 0.2525 0.6066 0.8727 0.032 Uiso 1 1 calc R U . . .  
H6B H 0.2859 0.7415 0.8290 0.032 Uiso 1 1 calc R U . . .  
C7 C 0.43137(16) 0.64563(13) 0.80950(11) 0.0214(3) Uani 1 1 d . . . . .  
H7 H 0.4449 0.6757 0.7425 0.026 Uiso 1 1 calc R U . . .  
C8 C 0.57058(16) 0.75397(14) 0.91040(11) 0.0234(3) Uani 1 1 d . . . . .  
C9 C 0.59394(19) 0.90048(15) 0.90150(13) 0.0305(3) Uani 1 1 d . . . . .  
H9A H 0.6142 0.9107 0.8325 0.046 Uiso 1 1 calc R U . . .  
H9B H 0.6808 0.9688 0.9655 0.046 Uiso 1 1 calc R U . . .  
H9C H 0.5017 0.9151 0.9008 0.046 Uiso 1 1 calc R U . . .  
C10 C 0.54409(18) 0.74106(16) 1.02095(12) 0.0297(3) Uani 1 1 d . . . . .  
H10A H 0.4632 0.7710 1.0275 0.045 Uiso 1 1 calc R U . . .  
H10B H 0.6387 0.7994 1.0834 0.045 Uiso 1 1 calc R U . . .  
H10C H 0.5135 0.6445 1.0223 0.045 Uiso 1 1 calc R U . . .  
C11 C 0.71395(16) 0.73101(14) 0.91183(11) 0.0232(3) Uani 1 1 d . . . . .  
C12 C 0.85957(17) 0.81542(15) 0.99189(12) 0.0285(3) Uani 1 1 d . . . . .  
H12 H 0.8752 0.9014 1.0381 0.034 Uiso 1 1 calc R U . . .  
C13 C 0.98043(17) 0.77562(16) 1.00461(12) 0.0298(3) Uani 1 1 d . . . . .

## CIF 31

H13 H 1.0784 0.8372 1.0562 0.036 Uiso 1 1 calc R U . . .  
C14 C 0.96071(17) 0.64621(16) 0.94277(12) 0.0280(3) Uani 1 1 d . . . . .  
H14 H 1.0409 0.6156 0.9553 0.034 Uiso 1 1 calc R U . . .  
C15 C 0.81924(16) 0.56572(14) 0.86290(11) 0.0239(3) Uani 1 1 d . . . . .  
C16 C 0.70346(16) 0.61373(13) 0.84153(11) 0.0212(3) Uani 1 1 d . . . . .  
C17 C 0.56292(15) 0.49922(13) 0.75610(10) 0.0196(3) Uani 1 1 d . . . . .  
C18 C 0.42087(15) 0.49365(13) 0.78574(10) 0.0196(3) Uani 1 1 d . . . . .  
H18 H 0.4139 0.4552 0.8503 0.024 Uiso 1 1 calc R U . . .  
C19 C 0.28901(15) 0.39949(13) 0.67642(11) 0.0198(3) Uani 1 1 d . . . . .  
C20 C 0.36214(15) 0.45279(13) 0.59172(11) 0.0197(3) Uani 1 1 d . . . . .  
C21 C 0.26407(16) 0.24742(14) 0.65272(11) 0.0241(3) Uani 1 1 d . . . . .  
H21 H 0.1609 0.1853 0.6352 0.029 Uiso 1 1 calc R U . . .  
C22 C 0.35911(17) 0.18522(14) 0.65186(12) 0.0262(3) Uani 1 1 d . . . . .  
H22 H 0.3096 0.0875 0.6346 0.031 Uiso 1 1 calc R U . . .  
C23 C 0.52808(16) 0.23651(14) 0.67230(12) 0.0240(3) Uani 1 1 d . . . . .  
C24 C 0.55142(18) 0.22917(15) 0.55783(12) 0.0295(3) Uani 1 1 d . . . . .  
H24A H 0.5064 0.2847 0.5206 0.044 Uiso 1 1 calc R U . . .  
H24B H 0.5017 0.1329 0.5115 0.044 Uiso 1 1 calc R U . . .  
H24C H 0.6609 0.2653 0.5691 0.044 Uiso 1 1 calc R U . . .  
C25 C 0.58856(19) 0.13902(15) 0.72408(13) 0.0319(3) Uani 1 1 d . . . . .  
H25A H 0.6966 0.1674 0.7321 0.048 Uiso 1 1 calc R U . . .  
H25B H 0.5301 0.0440 0.6756 0.048 Uiso 1 1 calc R U . . .  
H25C H 0.5773 0.1436 0.7974 0.048 Uiso 1 1 calc R U . . .  
C26 C 0.61988(16) 0.38209(13) 0.74908(11) 0.0215(3) Uani 1 1 d . . . . .  
C27 C 0.06988(19) 0.17291(16) 0.28858(14) 0.0353(3) Uani 1 1 d . . . . .  
H27A H 0.0982 0.2393 0.3616 0.042 Uiso 1 1 calc R U . . .  
H27B H 0.0981 0.2266 0.2366 0.042 Uiso 1 1 calc R U . . .  
Cl1 Cl 0.17328(6) 0.06871(5) 0.30411(4) 0.04874(14) Uani 1 1 d . . . . .  
Cl2 Cl -0.12910(5) 0.07396(4) 0.23745(3) 0.04025(12) Uani 1 1 d . . . . .  
N1 N 0.76310(14) 0.42354(12) 0.80245(10) 0.0248(2) Uani 1 1 d . . . . .  
N2 N 0.51474(13) 0.51122(11) 0.64187(9) 0.0196(2) Uani 1 1 d . . . . .  
O1 O 0.29572(11) 0.43952(10) 0.49306(8) 0.0233(2) Uani 1 1 d . . . . .  
H2 H 0.577(2) 0.530(2) 0.6072(17) 0.037(5) Uiso 1 1 d . . . . .

loop\_

\_atom\_site\_aniso\_label

\_atom\_site\_aniso\_U\_11

\_atom\_site\_aniso\_U\_22

\_atom\_site\_aniso\_U\_33

\_atom\_site\_aniso\_U\_23

\_atom\_site\_aniso\_U\_13

## CIF 31

\_atom\_site\_aniso\_U\_12

C1 0.0312(8) 0.0338(8) 0.0298(8) 0.0062(6) 0.0113(6) 0.0098(6)  
C2 0.0276(7) 0.0311(7) 0.0239(7) 0.0082(6) 0.0121(6) 0.0142(6)  
C3 0.0263(7) 0.0255(7) 0.0208(6) 0.0080(5) 0.0114(5) 0.0119(5)  
C4 0.0302(7) 0.0358(8) 0.0266(7) 0.0122(6) 0.0163(6) 0.0140(6)  
C5 0.0302(7) 0.0286(7) 0.0247(7) 0.0067(6) 0.0091(6) 0.0173(6)  
C6 0.0335(8) 0.0272(7) 0.0242(7) 0.0036(5) 0.0103(6) 0.0181(6)  
C7 0.0311(7) 0.0204(6) 0.0170(6) 0.0060(5) 0.0092(5) 0.0144(5)  
C8 0.0333(7) 0.0214(6) 0.0175(6) 0.0044(5) 0.0086(5) 0.0140(6)  
C9 0.0407(8) 0.0210(7) 0.0314(8) 0.0063(6) 0.0116(6) 0.0155(6)  
C10 0.0392(8) 0.0333(7) 0.0181(6) 0.0049(6) 0.0102(6) 0.0172(6)  
C11 0.0321(7) 0.0219(6) 0.0173(6) 0.0073(5) 0.0087(5) 0.0120(5)  
C12 0.0346(8) 0.0256(7) 0.0209(7) 0.0031(5) 0.0072(6) 0.0105(6)  
C13 0.0296(7) 0.0314(7) 0.0223(7) 0.0062(6) 0.0052(6) 0.0088(6)  
C14 0.0281(7) 0.0330(7) 0.0258(7) 0.0108(6) 0.0096(6) 0.0143(6)  
C15 0.0305(7) 0.0245(6) 0.0213(6) 0.0084(5) 0.0117(5) 0.0136(6)  
C16 0.0277(7) 0.0206(6) 0.0177(6) 0.0077(5) 0.0089(5) 0.0108(5)  
C17 0.0277(7) 0.0178(6) 0.0169(6) 0.0065(5) 0.0099(5) 0.0112(5)  
C18 0.0272(7) 0.0196(6) 0.0170(6) 0.0072(5) 0.0104(5) 0.0123(5)  
C19 0.0263(6) 0.0192(6) 0.0180(6) 0.0074(5) 0.0113(5) 0.0101(5)  
C20 0.0273(6) 0.0161(6) 0.0185(6) 0.0056(5) 0.0110(5) 0.0095(5)  
C21 0.0293(7) 0.0187(6) 0.0251(7) 0.0071(5) 0.0125(5) 0.0081(5)  
C22 0.0347(7) 0.0171(6) 0.0286(7) 0.0068(5) 0.0144(6) 0.0099(5)  
C23 0.0332(7) 0.0193(6) 0.0244(7) 0.0060(5) 0.0129(6) 0.0143(6)  
C24 0.0377(8) 0.0274(7) 0.0257(7) 0.0036(6) 0.0148(6) 0.0149(6)  
C25 0.0453(9) 0.0245(7) 0.0334(8) 0.0089(6) 0.0146(7) 0.0216(7)  
C26 0.0311(7) 0.0199(6) 0.0208(6) 0.0083(5) 0.0138(5) 0.0142(5)  
C27 0.0382(8) 0.0242(7) 0.0374(8) 0.0055(6) 0.0126(7) 0.0075(6)  
Cl1 0.0551(3) 0.0496(3) 0.0484(3) 0.0179(2) 0.0149(2) 0.0295(2)  
Cl2 0.0378(2) 0.0342(2) 0.0378(2) -0.00188(16) 0.01421(17) 0.00678(16)  
N1 0.0301(6) 0.0236(6) 0.0256(6) 0.0082(5) 0.0120(5) 0.0144(5)  
N2 0.0255(6) 0.0208(5) 0.0157(5) 0.0070(4) 0.0100(4) 0.0100(4)  
O1 0.0267(5) 0.0259(5) 0.0167(4) 0.0066(4) 0.0089(4) 0.0087(4)

\_geom\_special\_details

;

All esds (except the esd in the dihedral angle between two l.s. planes) are estimated using the full covariance matrix. The cell esds are taken into account individually in the estimation of esds in distances, angles and torsion angles; correlations between esds in cell parameters are only used when they are defined by crystal symmetry. An approximate (isotropic)

## CIF 31

treatment of cell esds is used for estimating esds involving l.s. planes.

;

loop\_

\_geom\_bond\_atom\_site\_label\_1

\_geom\_bond\_atom\_site\_label\_2

\_geom\_bond\_distance

\_geom\_bond\_site\_symmetry\_2

\_geom\_bond\_publ\_flag

C1 C2 1.323(2) . ?

C1 H1A 0.9500 . ?

C1 H1B 0.9500 . ?

C2 C3 1.5146(19) . ?

C2 H2A 0.9500 . ?

C3 C5 1.5408(19) . ?

C3 C4 1.5421(18) . ?

C3 C19 1.5706(18) . ?

C4 H4A 0.9800 . ?

C4 H4B 0.9800 . ?

C4 H4C 0.9800 . ?

C5 C6 1.522(2) . ?

C5 H5A 0.9900 . ?

C5 H5B 0.9900 . ?

C6 C7 1.5301(19) . ?

C6 H6A 0.9900 . ?

C6 H6B 0.9900 . ?

C7 C8 1.5558(19) . ?

C7 C18 1.5722(17) . ?

C7 H7 1.0000 . ?

C8 C11 1.5226(19) . ?

C8 C9 1.5397(18) . ?

C8 C10 1.5410(18) . ?

C9 H9A 0.9800 . ?

C9 H9B 0.9800 . ?

C9 H9C 0.9800 . ?

C10 H10A 0.9800 . ?

C10 H10B 0.9800 . ?

C10 H10C 0.9800 . ?

C11 C16 1.3797(19) . ?

C11 C12 1.412(2) . ?

C12 C13 1.389(2) . ?



C12 H12 0.9500 . ?  
C13 C14 1.404(2) . ?  
C13 H13 0.9500 . ?  
C14 C15 1.380(2) . ?  
C14 H14 0.9500 . ?  
C15 C16 1.4000(19) . ?  
C15 N1 1.4295(18) . ?  
C16 C17 1.4987(18) . ?  
C17 N2 1.4763(16) . ?  
C17 C18 1.5384(18) . ?  
C17 C26 1.5477(17) . ?  
C18 C19 1.5467(18) . ?  
C18 H18 1.0000 . ?  
C19 C21 1.5298(17) . ?  
C19 C20 1.5467(17) . ?  
C20 O1 1.2369(16) . ?  
C20 N2 1.3454(18) . ?  
C21 C22 1.333(2) . ?  
C21 H21 0.9500 . ?  
C22 C23 1.507(2) . ?  
C22 H22 0.9500 . ?  
C23 C26 1.5139(19) . ?  
C23 C25 1.5414(19) . ?  
C23 C24 1.5520(19) . ?  
C24 H24A 0.9800 . ?  
C24 H24B 0.9800 . ?  
C24 H24C 0.9800 . ?  
C25 H25A 0.9800 . ?  
C25 H25B 0.9800 . ?  
C25 H25C 0.9800 . ?  
C26 N1 1.2850(19) . ?  
C27 Cl2 1.7632(17) . ?  
C27 Cl1 1.7653(17) . ?  
C27 H27A 0.9900 . ?  
C27 H27B 0.9900 . ?  
N2 H2 0.84(2) . ?

loop\_

\_geom\_angle\_atom\_site\_label\_1  
\_geom\_angle\_atom\_site\_label\_2  
\_geom\_angle\_atom\_site\_label\_3

\_geom\_angle  
\_geom\_angle\_site\_symmetry\_1  
\_geom\_angle\_site\_symmetry\_3  
\_geom\_angle\_publ\_flag  
C2 C1 H1A 120.0 . . ?  
C2 C1 H1B 120.0 . . ?  
H1A C1 H1B 120.0 . . ?  
C1 C2 C3 127.24(14) . . ?  
C1 C2 H2A 116.4 . . ?  
C3 C2 H2A 116.4 . . ?  
C2 C3 C5 107.12(11) . . ?  
C2 C3 C4 111.45(12) . . ?  
C5 C3 C4 108.59(11) . . ?  
C2 C3 C19 110.78(11) . . ?  
C5 C3 C19 110.04(11) . . ?  
C4 C3 C19 108.81(11) . . ?  
C3 C4 H4A 109.5 . . ?  
C3 C4 H4B 109.5 . . ?  
H4A C4 H4B 109.5 . . ?  
C3 C4 H4C 109.5 . . ?  
H4A C4 H4C 109.5 . . ?  
H4B C4 H4C 109.5 . . ?  
C6 C5 C3 112.57(11) . . ?  
C6 C5 H5A 109.1 . . ?  
C3 C5 H5A 109.1 . . ?  
C6 C5 H5B 109.1 . . ?  
C3 C5 H5B 109.1 . . ?  
H5A C5 H5B 107.8 . . ?  
C5 C6 C7 109.84(11) . . ?  
C5 C6 H6A 109.7 . . ?  
C7 C6 H6A 109.7 . . ?  
C5 C6 H6B 109.7 . . ?  
C7 C6 H6B 109.7 . . ?  
H6A C6 H6B 108.2 . . ?  
C6 C7 C8 113.43(11) . . ?  
C6 C7 C18 109.92(11) . . ?  
C8 C7 C18 115.71(11) . . ?  
C6 C7 H7 105.6 . . ?  
C8 C7 H7 105.6 . . ?  
C18 C7 H7 105.6 . . ?  
C11 C8 C9 109.59(12) . . ?

C11 C8 C10 108.09(11) . . ?  
C9 C8 C10 108.84(11) . . ?  
C11 C8 C7 110.13(11) . . ?  
C9 C8 C7 109.41(11) . . ?  
C10 C8 C7 110.75(12) . . ?  
C8 C9 H9A 109.5 . . ?  
C8 C9 H9B 109.5 . . ?  
H9A C9 H9B 109.5 . . ?  
C8 C9 H9C 109.5 . . ?  
H9A C9 H9C 109.5 . . ?  
H9B C9 H9C 109.5 . . ?  
C8 C10 H10A 109.5 . . ?  
C8 C10 H10B 109.5 . . ?  
H10A C10 H10B 109.5 . . ?  
C8 C10 H10C 109.5 . . ?  
H10A C10 H10C 109.5 . . ?  
H10B C10 H10C 109.5 . . ?  
C16 C11 C12 115.87(13) . . ?  
C16 C11 C8 120.23(12) . . ?  
C12 C11 C8 123.42(12) . . ?  
C13 C12 C11 121.47(13) . . ?  
C13 C12 H12 119.3 . . ?  
C11 C12 H12 119.3 . . ?  
C12 C13 C14 121.31(14) . . ?  
C12 C13 H13 119.3 . . ?  
C14 C13 H13 119.3 . . ?  
C15 C14 C13 116.78(13) . . ?  
C15 C14 H14 121.6 . . ?  
C13 C14 H14 121.6 . . ?  
C14 C15 C16 121.38(13) . . ?  
C14 C15 N1 127.29(13) . . ?  
C16 C15 N1 110.91(12) . . ?  
C11 C16 C15 121.80(13) . . ?  
C11 C16 C17 127.97(12) . . ?  
C15 C16 C17 107.98(11) . . ?  
N2 C17 C16 118.52(11) . . ?  
N2 C17 C18 99.11(10) . . ?  
C16 C17 C18 110.09(10) . . ?  
N2 C17 C26 106.30(10) . . ?  
C16 C17 C26 99.15(10) . . ?  
C18 C17 C26 125.07(11) . . ?

C17 C18 C19 102.36(10) . . ?  
C17 C18 C7 106.12(10) . . ?  
C19 C18 C7 110.85(10) . . ?  
C17 C18 H18 112.3 . . ?  
C19 C18 H18 112.3 . . ?  
C7 C18 H18 112.3 . . ?  
C21 C19 C18 113.68(11) . . ?  
C21 C19 C20 104.82(10) . . ?  
C18 C19 C20 99.20(10) . . ?  
C21 C19 C3 108.06(11) . . ?  
C18 C19 C3 113.10(10) . . ?  
C20 C19 C3 117.73(11) . . ?  
O1 C20 N2 124.53(12) . . ?  
O1 C20 C19 127.26(12) . . ?  
N2 C20 C19 108.12(11) . . ?  
C22 C21 C19 132.43(13) . . ?  
C22 C21 H21 113.8 . . ?  
C19 C21 H21 113.8 . . ?  
C21 C22 C23 133.82(13) . . ?  
C21 C22 H22 113.1 . . ?  
C23 C22 H22 113.1 . . ?  
C22 C23 C26 113.79(11) . . ?  
C22 C23 C25 109.00(12) . . ?  
C26 C23 C25 108.29(12) . . ?  
C22 C23 C24 107.87(12) . . ?  
C26 C23 C24 109.80(11) . . ?  
C25 C23 C24 107.95(11) . . ?  
C23 C24 H24A 109.5 . . ?  
C23 C24 H24B 109.5 . . ?  
H24A C24 H24B 109.5 . . ?  
C23 C24 H24C 109.5 . . ?  
H24A C24 H24C 109.5 . . ?  
H24B C24 H24C 109.5 . . ?  
C23 C25 H25A 109.5 . . ?  
C23 C25 H25B 109.5 . . ?  
H25A C25 H25B 109.5 . . ?  
C23 C25 H25C 109.5 . . ?  
H25A C25 H25C 109.5 . . ?  
H25B C25 H25C 109.5 . . ?  
N1 C26 C23 120.53(12) . . ?  
N1 C26 C17 113.69(12) . . ?

C23 C26 C17 124.98(12) .. ?  
 CI2 C27 CI1 112.08(9) .. ?  
 CI2 C27 H27A 109.2 .. ?  
 CI1 C27 H27A 109.2 .. ?  
 CI2 C27 H27B 109.2 .. ?  
 CI1 C27 H27B 109.2 .. ?  
 H27A C27 H27B 107.9 .. ?  
 C26 N1 C15 107.59(11) .. ?  
 C20 N2 C17 112.86(11) .. ?  
 C20 N2 H2 123.6(14) .. ?  
 C17 N2 H2 121.0(14) .. ?

\_refine\_diff\_density\_max 0.413  
 \_refine\_diff\_density\_min -0.501  
 \_refine\_diff\_density\_rms 0.047

\_shelx\_res\_file  
 ;

shelx.res created by SHELXL-2014/7

TITL hr001\_sarpong\_a.res in P-1  
 CELL 1.54184 9.9276 10.7525 12.9548 99.713 104.856 110.259  
 ZERR 2.00 0.0001 0.0001 0.0001 0.001 0.001 0.001  
 LATT 1  
 SFAC C H CL N O  
 UNIT 54 64 4 4 2  
 MERG 2  
 FMAP 2  
 PLAN 20  
 SIZE 0.190 0.200 0.220  
 ACTA 148.00  
 BOND \$H  
 LIST 4  
 WPDB -2  
 L.S. 10  
 TEMP -173.00  
 WGHT 0.056700 0.588700  
 FVAR 1.20728  
 C1 1 -0.107225 0.219766 0.522499 11.00000 0.03116 0.03377 =  
 0.02984 0.00618 0.01132 0.00982

## CIF 31

```
AFIX 93
H1A 2 -0.130459 0.170423 0.574427 11.00000 -1.20000
H1B 2 -0.172595 0.185032 0.446906 11.00000 -1.20000
AFIX 0
C2 1 0.016200 0.336886 0.555464 11.00000 0.02761 0.03111 =
    0.02388 0.00822 0.01210 0.01422
AFIX 43
H2A 2 0.033775 0.381800 0.500021 11.00000 -1.20000
AFIX 0
C3 1 0.132564 0.407300 0.671743 11.00000 0.02627 0.02547 =
    0.02077 0.00797 0.01140 0.01194
C4 1 0.076599 0.340980 0.757978 11.00000 0.03022 0.03581 =
    0.02659 0.01225 0.01627 0.01399
AFIX 137
H4A 2 0.052674 0.241891 0.735981 11.00000 -1.50000
H4B 2 -0.015225 0.354086 0.761400 11.00000 -1.50000
H4C 2 0.156782 0.384817 0.831355 11.00000 -1.50000
AFIX 0
C5 1 0.153622 0.559346 0.701183 11.00000 0.03017 0.02859 =
    0.02475 0.00670 0.00907 0.01726
AFIX 23
H5A 2 0.179489 0.600024 0.642056 11.00000 -1.20000
H5B 2 0.056026 0.562854 0.703383 11.00000 -1.20000
AFIX 0
C6 1 0.278343 0.645513 0.812738 11.00000 0.03350 0.02724 =
    0.02417 0.00361 0.01030 0.01811
AFIX 23
H6A 2 0.252539 0.606649 0.872658 11.00000 -1.20000
H6B 2 0.285900 0.741498 0.829006 11.00000 -1.20000
AFIX 0
C7 1 0.431370 0.645628 0.809499 11.00000 0.03108 0.02035 =
    0.01702 0.00603 0.00921 0.01435
AFIX 13
H7 2 0.444881 0.675738 0.742524 11.00000 -1.20000
AFIX 0
C8 1 0.570579 0.753965 0.910396 11.00000 0.03331 0.02140 =
    0.01755 0.00442 0.00855 0.01397
C9 1 0.593944 0.900479 0.901503 11.00000 0.04070 0.02104 =
    0.03141 0.00631 0.01156 0.01550
AFIX 137
H9A 2 0.614188 0.910708 0.832547 11.00000 -1.50000
```

## CIF 31

|      |     |          |          |          |          |          |         |   |
|------|-----|----------|----------|----------|----------|----------|---------|---|
| H9B  | 2   | 0.680848 | 0.968837 | 0.965502 | 11.00000 | -1.50000 |         |   |
| H9C  | 2   | 0.501667 | 0.915142 | 0.900800 | 11.00000 | -1.50000 |         |   |
| AFIX | 0   |          |          |          |          |          |         |   |
| C10  | 1   | 0.544093 | 0.741056 | 1.020952 | 11.00000 | 0.03919  | 0.03330 | = |
|      |     | 0.01809  | 0.00489  | 0.01022  | 0.01721  |          |         |   |
| AFIX | 137 |          |          |          |          |          |         |   |
| H10A | 2   | 0.463245 | 0.771046 | 1.027515 | 11.00000 | -1.50000 |         |   |
| H10B | 2   | 0.638665 | 0.799391 | 1.083362 | 11.00000 | -1.50000 |         |   |
| H10C | 2   | 0.513525 | 0.644523 | 1.022288 | 11.00000 | -1.50000 |         |   |
| AFIX | 0   |          |          |          |          |          |         |   |
| C11  | 1   | 0.713951 | 0.731012 | 0.911833 | 11.00000 | 0.03211  | 0.02192 | = |
|      |     | 0.01730  | 0.00734  | 0.00870  | 0.01201  |          |         |   |
| C12  | 1   | 0.859569 | 0.815417 | 0.991887 | 11.00000 | 0.03462  | 0.02555 | = |
|      |     | 0.02088  | 0.00311  | 0.00718  | 0.01049  |          |         |   |
| AFIX | 43  |          |          |          |          |          |         |   |
| H12  | 2   | 0.875191 | 0.901352 | 1.038075 | 11.00000 | -1.20000 |         |   |
| AFIX | 0   |          |          |          |          |          |         |   |
| C13  | 1   | 0.980433 | 0.775616 | 1.004606 | 11.00000 | 0.02957  | 0.03142 | = |
|      |     | 0.02229  | 0.00620  | 0.00520  | 0.00879  |          |         |   |
| AFIX | 43  |          |          |          |          |          |         |   |
| H13  | 2   | 1.078426 | 0.837180 | 1.056180 | 11.00000 | -1.20000 |         |   |
| AFIX | 0   |          |          |          |          |          |         |   |
| C14  | 1   | 0.960708 | 0.646211 | 0.942770 | 11.00000 | 0.02807  | 0.03296 | = |
|      |     | 0.02583  | 0.01082  | 0.00958  | 0.01426  |          |         |   |
| AFIX | 43  |          |          |          |          |          |         |   |
| H14  | 2   | 1.040908 | 0.615553 | 0.955323 | 11.00000 | -1.20000 |         |   |
| AFIX | 0   |          |          |          |          |          |         |   |
| C15  | 1   | 0.819238 | 0.565724 | 0.862897 | 11.00000 | 0.03045  | 0.02455 | = |
|      |     | 0.02133  | 0.00844  | 0.01169  | 0.01357  |          |         |   |
| C16  | 1   | 0.703464 | 0.613727 | 0.841529 | 11.00000 | 0.02772  | 0.02057 | = |
|      |     | 0.01768  | 0.00772  | 0.00894  | 0.01083  |          |         |   |
| C17  | 1   | 0.562921 | 0.499224 | 0.756104 | 11.00000 | 0.02770  | 0.01782 | = |
|      |     | 0.01693  | 0.00650  | 0.00995  | 0.01122  |          |         |   |
| C18  | 1   | 0.420871 | 0.493653 | 0.785743 | 11.00000 | 0.02724  | 0.01956 | = |
|      |     | 0.01700  | 0.00718  | 0.01040  | 0.01234  |          |         |   |
| AFIX | 13  |          |          |          |          |          |         |   |
| H18  | 2   | 0.413928 | 0.455249 | 0.850255 | 11.00000 | -1.20000 |         |   |
| AFIX | 0   |          |          |          |          |          |         |   |
| C19  | 1   | 0.289007 | 0.399487 | 0.676420 | 11.00000 | 0.02633  | 0.01915 | = |
|      |     | 0.01795  | 0.00741  | 0.01132  | 0.01014  |          |         |   |
| C20  | 1   | 0.362144 | 0.452794 | 0.591722 | 11.00000 | 0.02729  | 0.01611 | = |

## CIF 31

|      |     |           |          |          |          |          |         |   |
|------|-----|-----------|----------|----------|----------|----------|---------|---|
|      |     | 0.01846   | 0.00558  | 0.01098  | 0.00954  |          |         |   |
| C21  | 1   | 0.264068  | 0.247420 | 0.652717 | 11.00000 | 0.02934  | 0.01870 | = |
|      |     | 0.02515   | 0.00714  | 0.01254  | 0.00809  |          |         |   |
| AFIX | 43  |           |          |          |          |          |         |   |
| H21  | 2   | 0.160913  | 0.185295 | 0.635228 | 11.00000 | -1.20000 |         |   |
| AFIX | 0   |           |          |          |          |          |         |   |
| C22  | 1   | 0.359111  | 0.185223 | 0.651859 | 11.00000 | 0.03475  | 0.01707 | = |
|      |     | 0.02859   | 0.00681  | 0.01443  | 0.00989  |          |         |   |
| AFIX | 43  |           |          |          |          |          |         |   |
| H22  | 2   | 0.309633  | 0.087497 | 0.634647 | 11.00000 | -1.20000 |         |   |
| AFIX | 0   |           |          |          |          |          |         |   |
| C23  | 1   | 0.528082  | 0.236511 | 0.672303 | 11.00000 | 0.03321  | 0.01926 | = |
|      |     | 0.02439   | 0.00600  | 0.01292  | 0.01427  |          |         |   |
| C24  | 1   | 0.551422  | 0.229171 | 0.557826 | 11.00000 | 0.03770  | 0.02741 | = |
|      |     | 0.02571   | 0.00360  | 0.01477  | 0.01488  |          |         |   |
| AFIX | 137 |           |          |          |          |          |         |   |
| H24A | 2   | 0.506447  | 0.284713 | 0.520569 | 11.00000 | -1.50000 |         |   |
| H24B | 2   | 0.501669  | 0.132858 | 0.511533 | 11.00000 | -1.50000 |         |   |
| H24C | 2   | 0.660889  | 0.265307 | 0.569089 | 11.00000 | -1.50000 |         |   |
| AFIX | 0   |           |          |          |          |          |         |   |
| C25  | 1   | 0.588556  | 0.139019 | 0.724085 | 11.00000 | 0.04531  | 0.02447 | = |
|      |     | 0.03345   | 0.00891  | 0.01458  | 0.02158  |          |         |   |
| AFIX | 137 |           |          |          |          |          |         |   |
| H25A | 2   | 0.696640  | 0.167411 | 0.732144 | 11.00000 | -1.50000 |         |   |
| H25B | 2   | 0.530145  | 0.044050 | 0.675584 | 11.00000 | -1.50000 |         |   |
| H25C | 2   | 0.577332  | 0.143613 | 0.797448 | 11.00000 | -1.50000 |         |   |
| AFIX | 0   |           |          |          |          |          |         |   |
| C26  | 1   | 0.619884  | 0.382089 | 0.749077 | 11.00000 | 0.03111  | 0.01993 | = |
|      |     | 0.02075   | 0.00826  | 0.01377  | 0.01416  |          |         |   |
| C27  | 1   | 0.069882  | 0.172912 | 0.288581 | 11.00000 | 0.03820  | 0.02425 | = |
|      |     | 0.03739   | 0.00555  | 0.01262  | 0.00753  |          |         |   |
| AFIX | 23  |           |          |          |          |          |         |   |
| H27A | 2   | 0.098242  | 0.239337 | 0.361584 | 11.00000 | -1.20000 |         |   |
| H27B | 2   | 0.098139  | 0.226591 | 0.236649 | 11.00000 | -1.20000 |         |   |
| AFIX | 0   |           |          |          |          |          |         |   |
| CL1  | 3   | 0.173280  | 0.068710 | 0.304107 | 11.00000 | 0.05508  | 0.04964 | = |
|      |     | 0.04843   | 0.01789  | 0.01487  | 0.02947  |          |         |   |
| CL2  | 3   | -0.129102 | 0.073960 | 0.237452 | 11.00000 | 0.03777  | 0.03423 | = |
|      |     | 0.03778   | -0.00188 | 0.01421  | 0.00678  |          |         |   |
| N1   | 4   | 0.763096  | 0.423540 | 0.802449 | 11.00000 | 0.03012  | 0.02364 | = |
|      |     | 0.02564   | 0.00822  | 0.01200  | 0.01436  |          |         |   |



## CIF 31

|      |   |          |          |          |          |         |           |
|------|---|----------|----------|----------|----------|---------|-----------|
| N2   | 4 | 0.514738 | 0.511217 | 0.641874 | 11.00000 | 0.02552 | 0.02078 = |
|      |   | 0.01568  | 0.00700  | 0.01003  | 0.01001  |         |           |
| O1   | 5 | 0.295722 | 0.439522 | 0.493061 | 11.00000 | 0.02669 | 0.02586 = |
|      |   | 0.01668  | 0.00659  | 0.00888  | 0.00869  |         |           |
| H2   | 2 | 0.577106 | 0.530210 | 0.607170 | 11.00000 | 0.03728 |           |
| HKLF | 4 |          |          |          |          |         |           |

REM hr001\_sarpong\_a.res in P-1

REM R1 = 0.0395 for 4845 Fo &gt; 4sig(Fo) and 0.0397 for all 4913 data

REM 298 parameters refined using 0 restraints

END

WGHT 0.0567 0.5888

REM Highest difference peak 0.413, deepest hole -0.501, 1-sigma level 0.047

|     |   |         |        |        |          |      |      |
|-----|---|---------|--------|--------|----------|------|------|
| Q1  | 1 | 0.0561  | 0.0467 | 0.2915 | 11.00000 | 0.05 | 0.41 |
| Q2  | 1 | -0.2368 | 0.0638 | 0.2144 | 11.00000 | 0.05 | 0.38 |
| Q3  | 1 | 0.4808  | 0.4837 | 0.7673 | 11.00000 | 0.05 | 0.35 |
| Q4  | 1 | 0.2101  | 0.4025 | 0.6710 | 11.00000 | 0.05 | 0.34 |
| Q5  | 1 | 0.3551  | 0.6457 | 0.8131 | 11.00000 | 0.05 | 0.34 |
| Q6  | 1 | -0.0178 | 0.1253 | 0.2453 | 11.00000 | 0.05 | 0.33 |
| Q7  | 1 | 0.6430  | 0.7366 | 0.9115 | 11.00000 | 0.05 | 0.32 |
| Q8  | 1 | 0.1237  | 0.0553 | 0.3465 | 11.00000 | 0.05 | 0.30 |
| Q9  | 1 | 0.7729  | 0.6010 | 0.8527 | 11.00000 | 0.05 | 0.30 |
| Q10 | 1 | 0.4438  | 0.2108 | 0.6580 | 11.00000 | 0.05 | 0.30 |
| Q11 | 1 | 0.3424  | 0.4425 | 0.7280 | 11.00000 | 0.05 | 0.29 |
| Q12 | 1 | 0.5770  | 0.3151 | 0.7137 | 11.00000 | 0.05 | 0.27 |
| Q13 | 1 | 0.5065  | 0.6944 | 0.8620 | 11.00000 | 0.05 | 0.26 |
| Q14 | 1 | 0.6260  | 0.5587 | 0.8050 | 11.00000 | 0.05 | 0.25 |
| Q15 | 1 | 0.4272  | 0.5641 | 0.7974 | 11.00000 | 0.05 | 0.25 |
| Q16 | 1 | 0.8696  | 0.5924 | 0.9183 | 11.00000 | 0.05 | 0.25 |
| Q17 | 1 | 0.7774  | 0.7642 | 0.9638 | 11.00000 | 0.05 | 0.25 |
| Q18 | 1 | 0.3173  | 0.4272 | 0.6323 | 11.00000 | 0.05 | 0.25 |
| Q19 | 1 | 0.3002  | 0.1031 | 0.3172 | 11.00000 | 0.05 | 0.24 |
| Q20 | 1 | 0.1416  | 0.4793 | 0.6876 | 11.00000 | 0.05 | 0.24 |

;  
\_shelx\_res\_checksum 43893

\_shelx\_hkl\_file

;

## CIF 31

|     |   |   |        |      |
|-----|---|---|--------|------|
| -12 | 2 | 3 | 87.21  | 2.01 |
| -12 | 2 | 3 | 83.98  | 2.03 |
| -12 | 2 | 4 | 13.41  | 0.86 |
| -12 | 2 | 4 | 13.92  | 0.86 |
| -12 | 2 | 5 | 0.39   | 0.40 |
| -12 | 2 | 5 | 0.21   | 0.42 |
| -12 | 2 | 6 | 57.94  | 1.72 |
| -12 | 2 | 6 | 53.23  | 1.53 |
| -12 | 2 | 7 | 23.99  | 1.00 |
| -12 | 2 | 7 | 23.49  | 1.05 |
| -12 | 3 | 2 | 5.10   | 0.65 |
| -12 | 3 | 3 | 39.91  | 1.55 |
| -12 | 3 | 3 | 42.02  | 1.57 |
| -12 | 3 | 4 | 11.46  | 0.96 |
| -12 | 3 | 4 | 13.40  | 1.01 |
| -12 | 3 | 4 | 11.24  | 0.83 |
| -12 | 3 | 5 | 43.42  | 1.61 |
| -12 | 3 | 5 | 39.76  | 1.33 |
| -12 | 3 | 5 | 44.09  | 1.64 |
| -12 | 3 | 6 | 61.06  | 1.89 |
| -12 | 3 | 6 | 58.97  | 1.79 |
| -12 | 3 | 7 | 22.01  | 1.10 |
| -12 | 3 | 7 | 20.04  | 0.97 |
| -12 | 4 | 1 | 49.74  | 1.59 |
| -12 | 4 | 1 | 55.57  | 1.72 |
| -12 | 4 | 2 | 28.19  | 1.35 |
| -12 | 4 | 2 | 24.79  | 1.40 |
| -12 | 4 | 2 | 27.35  | 1.28 |
| -12 | 4 | 3 | -0.12  | 0.63 |
| -12 | 4 | 3 | 0.42   | 0.63 |
| -12 | 4 | 3 | 1.17   | 0.54 |
| -12 | 4 | 4 | 5.62   | 0.92 |
| -12 | 4 | 4 | 5.84   | 0.84 |
| -12 | 4 | 4 | 6.20   | 0.74 |
| -12 | 4 | 5 | 98.94  | 2.37 |
| -12 | 4 | 5 | 108.64 | 2.66 |
| -12 | 4 | 6 | 0.48   | 0.42 |
| -12 | 4 | 6 | 0.35   | 0.59 |
| -12 | 5 | 1 | 6.47   | 0.72 |
| -12 | 5 | 2 | 19.12  | 1.31 |
| -12 | 5 | 2 | 18.59  | 1.03 |

## CIF 31

|     |    |   |        |      |
|-----|----|---|--------|------|
| -12 | 5  | 2 | 20.89  | 1.22 |
| -12 | 5  | 3 | 1.89   | 0.52 |
| -12 | 5  | 3 | 2.68   | 0.71 |
| -12 | 5  | 3 | 3.21   | 0.80 |
| -12 | 5  | 4 | 42.49  | 1.44 |
| -12 | 5  | 4 | 47.43  | 2.12 |
| -12 | 5  | 4 | 48.61  | 1.80 |
| -12 | 5  | 5 | 36.95  | 1.87 |
| -12 | 5  | 5 | 31.31  | 1.13 |
| -12 | 5  | 6 | 1.39   | 0.61 |
| -12 | 5  | 6 | 2.08   | 0.61 |
| -12 | 5  | 7 | 31.13  | 1.26 |
| -12 | 6  | 1 | 116.94 | 2.19 |
| -12 | 6  | 1 | 115.97 | 2.13 |
| -12 | 6  | 2 | 8.12   | 0.80 |
| -12 | 6  | 2 | 6.63   | 0.90 |
| -12 | 6  | 3 | 23.67  | 1.47 |
| -12 | 6  | 3 | 23.54  | 1.22 |
| -12 | 6  | 4 | 16.47  | 1.03 |
| -12 | 6  | 5 | 0.39   | 0.46 |
| -12 | 6  | 5 | 0.09   | 0.57 |
| -12 | 6  | 6 | 47.43  | 1.47 |
| -12 | 6  | 6 | 43.35  | 1.70 |
| -12 | 7  | 1 | 2.29   | 0.40 |
| -12 | 7  | 2 | 1.09   | 0.57 |
| -12 | 7  | 2 | 0.82   | 0.37 |
| -12 | 7  | 3 | 20.78  | 0.92 |
| -12 | 7  | 3 | 24.36  | 1.42 |
| -12 | 7  | 4 | 6.35   | 0.55 |
| -12 | 7  | 5 | 0.75   | 0.51 |
| -11 | -1 | 3 | 101.50 | 2.18 |
| -11 | -1 | 3 | 71.95  | 1.60 |
| -11 | -1 | 4 | 8.87   | 0.83 |
| -11 | -1 | 4 | 8.05   | 0.68 |
| -11 | -1 | 5 | 248.22 | 3.96 |
| -11 | -1 | 5 | 266.41 | 4.25 |
| -11 | -1 | 6 | 3.83   | 0.63 |
| -11 | -1 | 7 | 24.93  | 1.20 |
| -11 | -1 | 7 | 20.45  | 1.39 |
| -11 | -1 | 8 | 4.75   | 0.58 |
| -11 | -1 | 8 | 3.43   | 0.74 |

## CIF 31

|     |   |    |        |      |
|-----|---|----|--------|------|
| -11 | 0 | 1  | 26.91  | 1.17 |
| -11 | 0 | 1  | 24.94  | 1.03 |
| -11 | 0 | 2  | 28.05  | 1.28 |
| -11 | 0 | 2  | 26.27  | 1.32 |
| -11 | 0 | 3  | 38.93  | 1.68 |
| -11 | 0 | 3  | 38.55  | 1.62 |
| -11 | 0 | 4  | 81.60  | 2.43 |
| -11 | 0 | 5  | 99.45  | 2.75 |
| -11 | 0 | 5  | 94.66  | 3.10 |
| -11 | 0 | 6  | 88.21  | 3.08 |
| -11 | 0 | 6  | 77.48  | 2.63 |
| -11 | 0 | 7  | 117.25 | 3.53 |
| -11 | 0 | 7  | 103.74 | 3.09 |
| -11 | 0 | 8  | 55.44  | 2.36 |
| -11 | 0 | 8  | 61.00  | 1.81 |
| -11 | 0 | 9  | 24.33  | 0.95 |
| -11 | 0 | 9  | 24.00  | 1.46 |
| -11 | 0 | 10 | 51.18  | 1.87 |
| -11 | 1 | -1 | 25.06  | 0.97 |
| -11 | 1 | 0  | 9.19   | 0.66 |
| -11 | 1 | 0  | 10.81  | 0.86 |
| -11 | 1 | 1  | 33.74  | 1.55 |
| -11 | 1 | 1  | 33.02  | 1.56 |
| -11 | 1 | 1  | 29.47  | 1.35 |
| -11 | 1 | 2  | 14.69  | 1.23 |
| -11 | 1 | 2  | 15.43  | 1.23 |
| -11 | 1 | 2  | 12.75  | 1.05 |
| -11 | 1 | 3  | 160.91 | 3.55 |
| -11 | 1 | 3  | 178.97 | 3.97 |
| -11 | 1 | 4  | 41.23  | 1.96 |
| -11 | 1 | 4  | 40.66  | 1.82 |
| -11 | 1 | 4  | 41.57  | 2.02 |
| -11 | 1 | 5  | 12.22  | 1.11 |
| -11 | 1 | 5  | 13.03  | 1.23 |
| -11 | 1 | 5  | 10.68  | 1.28 |
| -11 | 1 | 6  | 409.78 | 6.00 |
| -11 | 1 | 6  | 422.24 | 6.20 |
| -11 | 1 | 7  | 6.57   | 1.03 |
| -11 | 1 | 7  | 7.81   | 1.26 |
| -11 | 1 | 7  | 5.33   | 0.87 |
| -11 | 1 | 7  | 5.36   | 0.83 |

## CIF 31

|     |   |    |        |      |
|-----|---|----|--------|------|
| -11 | 1 | 8  | 600.34 | 7.40 |
| -11 | 1 | 8  | 611.17 | 9.22 |
| -11 | 1 | 9  | 11.24  | 1.17 |
| -11 | 1 | 9  | 13.96  | 1.37 |
| -11 | 1 | 10 | 291.60 | 5.16 |
| -11 | 1 | 10 | 270.69 | 4.82 |
| -11 | 2 | -2 | 0.34   | 0.33 |
| -11 | 2 | -2 | 0.45   | 0.37 |
| -11 | 2 | -2 | 0.65   | 0.43 |
| -11 | 2 | -1 | 27.91  | 1.27 |
| -11 | 2 | -1 | 22.63  | 1.06 |
| -11 | 2 | 0  | 604.84 | 7.72 |
| -11 | 2 | 0  | 595.90 | 7.58 |
| -11 | 2 | 0  | 612.04 | 7.80 |
| -11 | 2 | 1  | 23.52  | 1.51 |
| -11 | 2 | 1  | 26.25  | 1.62 |
| -11 | 2 | 1  | 24.51  | 1.51 |
| -11 | 2 | 2  | 179.15 | 4.06 |
| -11 | 2 | 2  | 171.28 | 4.58 |
| -11 | 2 | 3  | 27.62  | 1.69 |
| -11 | 2 | 3  | 25.45  | 1.68 |
| -11 | 2 | 3  | 28.59  | 2.05 |
| -11 | 2 | 4  | 191.58 | 4.31 |
| -11 | 2 | 4  | 177.31 | 4.99 |
| -11 | 2 | 4  | 183.38 | 4.23 |
| -11 | 2 | 5  | 14.42  | 1.30 |
| -11 | 2 | 5  | 11.17  | 1.33 |
| -11 | 2 | 5  | 12.77  | 1.32 |
| -11 | 2 | 6  | 37.39  | 2.33 |
| -11 | 2 | 6  | 32.44  | 1.78 |
| -11 | 2 | 6  | 36.87  | 2.16 |
| -11 | 2 | 6  | 30.89  | 1.66 |
| -11 | 2 | 7  | 139.11 | 3.13 |
| -11 | 2 | 7  | 146.66 | 3.57 |
| -11 | 2 | 7  | 121.76 | 3.51 |
| -11 | 2 | 7  | 122.13 | 3.81 |
| -11 | 2 | 7  | 130.93 | 3.97 |
| -11 | 2 | 8  | 6.61   | 1.17 |
| -11 | 2 | 8  | 6.19   | 0.97 |
| -11 | 2 | 8  | 3.02   | 0.56 |
| -11 | 2 | 9  | 68.55  | 2.47 |

## CIF 31

|     |   |    |        |       |
|-----|---|----|--------|-------|
| -11 | 2 | 9  | 73.90  | 2.74  |
| -11 | 2 | 10 | 6.33   | 0.92  |
| -11 | 2 | 10 | 6.43   | 0.82  |
| -11 | 3 | -2 | 160.21 | 3.16  |
| -11 | 3 | -2 | 165.82 | 3.31  |
| -11 | 3 | -1 | 0.85   | 0.71  |
| -11 | 3 | -1 | 0.51   | 0.52  |
| -11 | 3 | -1 | 0.35   | 0.71  |
| -11 | 3 | 0  | 86.51  | 2.73  |
| -11 | 3 | 0  | 82.16  | 2.68  |
| -11 | 3 | 1  | 24.48  | 1.64  |
| -11 | 3 | 1  | 23.10  | 1.61  |
| -11 | 3 | 1  | 23.45  | 1.74  |
| -11 | 3 | 2  | 143.81 | 4.36  |
| -11 | 3 | 2  | 142.62 | 3.74  |
| -11 | 3 | 2  | 146.83 | 3.87  |
| -11 | 3 | 3  | 110.70 | 4.02  |
| -11 | 3 | 3  | 108.34 | 3.32  |
| -11 | 3 | 3  | 108.71 | 3.37  |
| -11 | 3 | 3  | 106.62 | 3.22  |
| -11 | 3 | 4  | 41.31  | 2.56  |
| -11 | 3 | 4  | 48.17  | 2.31  |
| -11 | 3 | 4  | 42.53  | 2.06  |
| -11 | 3 | 5  | 107.09 | 3.08  |
| -11 | 3 | 5  | 113.18 | 3.39  |
| -11 | 3 | 6  | 482.89 | 9.37  |
| -11 | 3 | 6  | 487.03 | 7.92  |
| -11 | 3 | 6  | 504.56 | 7.13  |
| -11 | 3 | 7  | 848.73 | 9.37  |
| -11 | 3 | 7  | 873.87 | 11.33 |
| -11 | 3 | 7  | 887.55 | 12.00 |
| -11 | 3 | 8  | 9.09   | 1.36  |
| -11 | 3 | 8  | 7.83   | 1.12  |
| -11 | 3 | 8  | 8.64   | 1.15  |
| -11 | 3 | 9  | 2.68   | 0.95  |
| -11 | 3 | 9  | 2.94   | 0.71  |
| -11 | 3 | 9  | 3.35   | 0.95  |
| -11 | 3 | 10 | 31.47  | 1.66  |
| -11 | 4 | -3 | 19.76  | 1.03  |
| -11 | 4 | -3 | 17.83  | 1.01  |
| -11 | 4 | -3 | 18.42  | 1.06  |

## CIF 31

|     |   |    |        |      |
|-----|---|----|--------|------|
| -11 | 4 | -2 | 122.71 | 2.98 |
| -11 | 4 | -1 | -0.34  | 0.78 |
| -11 | 4 | 0  | 0.74   | 0.82 |
| -11 | 4 | 0  | 0.40   | 0.85 |
| -11 | 4 | 0  | 0.81   | 0.75 |
| -11 | 4 | 1  | 67.26  | 2.62 |
| -11 | 4 | 1  | 70.33  | 2.99 |
| -11 | 4 | 1  | 66.13  | 2.52 |
| -11 | 4 | 1  | 64.75  | 2.56 |
| -11 | 4 | 2  | 183.76 | 4.40 |
| -11 | 4 | 2  | 181.37 | 4.24 |
| -11 | 4 | 3  | -0.13  | 1.02 |
| -11 | 4 | 3  | 0.17   | 0.85 |
| -11 | 4 | 3  | 0.46   | 0.77 |
| -11 | 4 | 4  | 47.91  | 2.94 |
| -11 | 4 | 4  | 44.59  | 2.70 |
| -11 | 4 | 5  | 3.44   | 1.29 |
| -11 | 4 | 5  | 2.31   | 0.69 |
| -11 | 4 | 5  | 2.89   | 1.19 |
| -11 | 4 | 5  | 2.55   | 1.11 |
| -11 | 4 | 6  | 4.47   | 1.29 |
| -11 | 4 | 6  | 2.90   | 1.30 |
| -11 | 4 | 6  | 3.41   | 1.16 |
| -11 | 4 | 7  | 11.31  | 1.37 |
| -11 | 4 | 7  | 15.06  | 1.71 |
| -11 | 4 | 8  | 269.17 | 6.18 |
| -11 | 4 | 8  | 261.87 | 6.22 |
| -11 | 4 | 8  | 282.72 | 5.35 |
| -11 | 4 | 9  | 61.18  | 2.66 |
| -11 | 4 | 10 | 6.62   | 0.91 |
| -11 | 5 | -3 | 3.79   | 0.72 |
| -11 | 5 | -3 | 4.05   | 0.67 |
| -11 | 5 | -2 | 11.06  | 1.08 |
| -11 | 5 | -1 | 29.71  | 1.62 |
| -11 | 5 | -1 | 28.85  | 1.67 |
| -11 | 5 | -1 | 24.77  | 1.42 |
| -11 | 5 | 0  | 1.22   | 0.79 |
| -11 | 5 | 0  | 2.28   | 0.90 |
| -11 | 5 | 0  | 1.99   | 0.88 |
| -11 | 5 | 1  | 5.36   | 1.00 |
| -11 | 5 | 1  | 5.29   | 1.09 |

## CIF 31

|     |   |    |        |      |
|-----|---|----|--------|------|
| -11 | 5 | 1  | 4.69   | 1.20 |
| -11 | 5 | 2  | 24.76  | 1.65 |
| -11 | 5 | 2  | 23.51  | 2.05 |
| -11 | 5 | 2  | 25.15  | 1.77 |
| -11 | 5 | 3  | 108.34 | 4.14 |
| -11 | 5 | 3  | 115.34 | 4.22 |
| -11 | 5 | 3  | 125.03 | 3.59 |
| -11 | 5 | 3  | 120.28 | 3.36 |
| -11 | 5 | 3  | 105.88 | 3.04 |
| -11 | 5 | 4  | 21.97  | 1.94 |
| -11 | 5 | 4  | 25.53  | 1.80 |
| -11 | 5 | 4  | 22.28  | 1.35 |
| -11 | 5 | 4  | 25.46  | 1.57 |
| -11 | 5 | 5  | 112.32 | 4.21 |
| -11 | 5 | 5  | 136.93 | 3.71 |
| -11 | 5 | 5  | 115.64 | 4.24 |
| -11 | 5 | 5  | 133.21 | 3.29 |
| -11 | 5 | 5  | 108.50 | 4.27 |
| -11 | 5 | 5  | 116.72 | 4.76 |
| -11 | 5 | 6  | 23.29  | 1.33 |
| -11 | 5 | 6  | 20.52  | 1.91 |
| -11 | 5 | 6  | 23.04  | 1.88 |
| -11 | 5 | 6  | 20.15  | 2.01 |
| -11 | 5 | 6  | 20.52  | 2.30 |
| -11 | 5 | 7  | 111.92 | 4.58 |
| -11 | 5 | 7  | 112.16 | 4.06 |
| -11 | 5 | 7  | 124.37 | 3.74 |
| -11 | 5 | 7  | 109.78 | 4.07 |
| -11 | 5 | 8  | 328.31 | 6.78 |
| -11 | 5 | 8  | 314.79 | 5.40 |
| -11 | 5 | 9  | 110.05 | 3.46 |
| -11 | 5 | 9  | 97.30  | 3.29 |
| -11 | 5 | 10 | 7.71   | 0.91 |
| -11 | 6 | -3 | 38.37  | 1.47 |
| -11 | 6 | -3 | 36.94  | 1.42 |
| -11 | 6 | -3 | 36.56  | 1.46 |
| -11 | 6 | -2 | 90.06  | 2.52 |
| -11 | 6 | -2 | 89.89  | 2.54 |
| -11 | 6 | -2 | 89.21  | 2.51 |
| -11 | 6 | -1 | 10.49  | 1.10 |
| -11 | 6 | -1 | 12.70  | 1.19 |



## CIF 31

|     |   |    |        |      |
|-----|---|----|--------|------|
| -11 | 6 | 0  | 103.91 | 3.07 |
| -11 | 6 | 0  | 98.45  | 3.38 |
| -11 | 6 | 0  | 97.32  | 2.78 |
| -11 | 6 | 1  | 188.47 | 4.29 |
| -11 | 6 | 1  | 181.10 | 4.99 |
| -11 | 6 | 1  | 176.64 | 3.89 |
| -11 | 6 | 2  | 1.20   | 1.03 |
| -11 | 6 | 2  | 1.40   | 0.73 |
| -11 | 6 | 2  | 1.13   | 0.80 |
| -11 | 6 | 3  | 313.64 | 7.01 |
| -11 | 6 | 3  | 322.03 | 5.74 |
| -11 | 6 | 4  | 8.13   | 0.88 |
| -11 | 6 | 4  | 10.01  | 1.19 |
| -11 | 6 | 4  | 8.89   | 1.31 |
| -11 | 6 | 4  | 7.25   | 1.38 |
| -11 | 6 | 4  | 8.06   | 1.61 |
| -11 | 6 | 5  | 303.86 | 7.00 |
| -11 | 6 | 5  | 295.79 | 7.70 |
| -11 | 6 | 5  | 297.49 | 6.67 |
| -11 | 6 | 6  | 24.33  | 1.96 |
| -11 | 6 | 6  | 23.95  | 2.35 |
| -11 | 6 | 6  | 22.53  | 1.78 |
| -11 | 6 | 6  | 24.84  | 1.96 |
| -11 | 6 | 6  | 25.43  | 2.07 |
| -11 | 6 | 6  | 21.67  | 1.43 |
| -11 | 6 | 7  | 46.36  | 1.84 |
| -11 | 6 | 7  | 35.85  | 2.61 |
| -11 | 6 | 7  | 46.18  | 2.13 |
| -11 | 6 | 7  | 37.88  | 2.29 |
| -11 | 6 | 7  | 34.73  | 2.25 |
| -11 | 6 | 7  | 35.45  | 2.17 |
| -11 | 6 | 8  | 157.46 | 3.11 |
| -11 | 6 | 8  | 150.70 | 4.13 |
| -11 | 6 | 8  | 144.59 | 4.16 |
| -11 | 6 | 9  | 92.32  | 1.97 |
| -11 | 7 | -3 | 12.71  | 0.80 |
| -11 | 7 | -3 | 12.99  | 0.76 |
| -11 | 7 | -3 | 15.27  | 0.91 |
| -11 | 7 | -2 | 175.46 | 3.28 |
| -11 | 7 | -2 | 176.73 | 3.19 |
| -11 | 7 | -2 | 178.38 | 3.41 |

## CIF 31

|     |   |    |        |      |
|-----|---|----|--------|------|
| -11 | 7 | -1 | 15.16  | 1.26 |
| -11 | 7 | -1 | 15.89  | 1.05 |
| -11 | 7 | -1 | 15.11  | 1.14 |
| -11 | 7 | -1 | 15.08  | 1.10 |
| -11 | 7 | 0  | 14.51  | 1.18 |
| -11 | 7 | 0  | 14.21  | 1.04 |
| -11 | 7 | 0  | 13.95  | 1.09 |
| -11 | 7 | 0  | 11.49  | 1.29 |
| -11 | 7 | 1  | 6.84   | 1.22 |
| -11 | 7 | 1  | 7.85   | 0.85 |
| -11 | 7 | 1  | 8.39   | 1.00 |
| -11 | 7 | 2  | 5.05   | 1.25 |
| -11 | 7 | 2  | 4.40   | 0.86 |
| -11 | 7 | 3  | 10.10  | 1.57 |
| -11 | 7 | 3  | 11.59  | 1.38 |
| -11 | 7 | 4  | 1.24   | 1.02 |
| -11 | 7 | 4  | 2.62   | 1.22 |
| -11 | 7 | 4  | 0.67   | 0.64 |
| -11 | 7 | 4  | 1.20   | 0.94 |
| -11 | 7 | 5  | 87.42  | 3.30 |
| -11 | 7 | 5  | 74.41  | 2.88 |
| -11 | 7 | 5  | 80.28  | 3.23 |
| -11 | 7 | 5  | 74.22  | 3.58 |
| -11 | 7 | 5  | 94.25  | 2.53 |
| -11 | 7 | 5  | 76.47  | 3.25 |
| -11 | 7 | 6  | 302.32 | 6.26 |
| -11 | 7 | 6  | 332.00 | 4.81 |
| -11 | 7 | 6  | 278.87 | 6.35 |
| -11 | 7 | 6  | 314.86 | 5.94 |
| -11 | 7 | 6  | 295.54 | 5.95 |
| -11 | 7 | 6  | 291.35 | 6.99 |
| -11 | 7 | 7  | 309.92 | 4.19 |
| -11 | 7 | 7  | 285.75 | 6.61 |
| -11 | 7 | 7  | 277.47 | 4.76 |
| -11 | 7 | 7  | 278.37 | 5.56 |
| -11 | 7 | 7  | 265.88 | 5.86 |
| -11 | 7 | 7  | 300.43 | 5.93 |
| -11 | 7 | 8  | 294.22 | 5.44 |
| -11 | 7 | 8  | 272.64 | 5.80 |
| -11 | 8 | -2 | 20.22  | 0.95 |
| -11 | 8 | -1 | 0.59   | 0.42 |

## CIF 31

|     |    |    |        |      |
|-----|----|----|--------|------|
| -11 | 8  | -1 | 0.82   | 0.61 |
| -11 | 8  | -1 | 1.24   | 0.44 |
| -11 | 8  | -1 | 1.34   | 0.41 |
| -11 | 8  | 0  | 12.28  | 1.24 |
| -11 | 8  | 0  | 10.32  | 0.78 |
| -11 | 8  | 0  | 11.58  | 0.86 |
| -11 | 8  | 1  | 37.83  | 1.49 |
| -11 | 8  | 1  | 34.62  | 2.08 |
| -11 | 8  | 2  | 27.16  | 1.31 |
| -11 | 8  | 2  | 25.25  | 1.87 |
| -11 | 8  | 2  | 24.11  | 1.14 |
| -11 | 8  | 3  | 113.21 | 3.87 |
| -11 | 8  | 3  | 117.80 | 2.43 |
| -11 | 8  | 4  | 37.45  | 2.41 |
| -11 | 8  | 4  | 35.28  | 1.84 |
| -11 | 8  | 4  | 46.11  | 2.39 |
| -11 | 8  | 4  | 50.09  | 1.65 |
| -11 | 8  | 5  | 33.71  | 1.83 |
| -11 | 8  | 5  | 38.30  | 2.43 |
| -11 | 8  | 5  | 39.18  | 2.03 |
| -11 | 8  | 6  | 30.01  | 1.52 |
| -11 | 8  | 6  | 31.94  | 1.75 |
| -11 | 8  | 7  | 0.76   | 0.59 |
| -11 | 8  | 7  | 1.26   | 0.88 |
| -11 | 9  | -1 | 62.56  | 1.62 |
| -11 | 9  | 0  | 10.53  | 1.05 |
| -11 | 9  | 0  | 11.34  | 0.81 |
| -11 | 9  | 1  | 9.05   | 1.09 |
| -11 | 9  | 1  | 9.68   | 0.82 |
| -11 | 9  | 2  | 77.83  | 2.80 |
| -11 | 9  | 2  | 87.41  | 2.15 |
| -11 | 9  | 3  | 69.69  | 2.64 |
| -11 | 9  | 3  | 55.04  | 2.30 |
| -11 | 9  | 4  | 277.14 | 3.86 |
| -11 | 9  | 4  | 252.94 | 4.85 |
| -11 | 9  | 5  | 104.86 | 2.61 |
| -11 | 9  | 5  | 99.05  | 3.15 |
| -10 | -3 | 3  | 13.55  | 0.75 |
| -10 | -3 | 4  | 0.23   | 0.45 |
| -10 | -3 | 5  | 6.46   | 0.77 |
| -10 | -3 | 6  | 1.75   | 0.62 |

## CIF 31

|     |    |    |        |      |
|-----|----|----|--------|------|
| -10 | -3 | 7  | 91.12  | 2.36 |
| -10 | -3 | 8  | 0.80   | 0.67 |
| -10 | -3 | 9  | 48.85  | 1.93 |
| -10 | -3 | 9  | 42.93  | 1.85 |
| -10 | -2 | 0  | 64.29  | 1.64 |
| -10 | -2 | 1  | 165.46 | 3.01 |
| -10 | -2 | 1  | 155.92 | 2.74 |
| -10 | -2 | 2  | 33.14  | 1.35 |
| -10 | -2 | 2  | 38.67  | 1.54 |
| -10 | -2 | 3  | 200.86 | 3.85 |
| -10 | -2 | 3  | 152.23 | 2.95 |
| -10 | -2 | 4  | 69.38  | 2.16 |
| -10 | -2 | 4  | 71.75  | 2.40 |
| -10 | -2 | 5  | 10.90  | 1.46 |
| -10 | -2 | 5  | 18.96  | 1.37 |
| -10 | -2 | 6  | 2.86   | 0.98 |
| -10 | -2 | 6  | 3.09   | 1.07 |
| -10 | -2 | 7  | 0.82   | 0.87 |
| -10 | -2 | 7  | 0.50   | 0.95 |
| -10 | -2 | 8  | 6.89   | 1.19 |
| -10 | -2 | 8  | 6.00   | 1.21 |
| -10 | -2 | 9  | 64.74  | 2.66 |
| -10 | -2 | 10 | 87.46  | 2.86 |
| -10 | -2 | 11 | 0.17   | 0.50 |
| -10 | -1 | -1 | 14.31  | 0.94 |
| -10 | -1 | 0  | 10.04  | 0.92 |
| -10 | -1 | 0  | 9.46   | 0.85 |
| -10 | -1 | 1  | 55.31  | 2.00 |
| -10 | -1 | 1  | 56.30  | 2.07 |
| -10 | -1 | 1  | 57.80  | 1.96 |
| -10 | -1 | 2  | 108.74 | 2.95 |
| -10 | -1 | 2  | 106.44 | 3.06 |
| -10 | -1 | 2  | 100.71 | 2.71 |
| -10 | -1 | 3  | 309.54 | 5.50 |
| -10 | -1 | 3  | 303.79 | 5.58 |
| -10 | -1 | 4  | 3.66   | 1.22 |
| -10 | -1 | 4  | 6.05   | 1.10 |
| -10 | -1 | 4  | 3.31   | 1.07 |
| -10 | -1 | 5  | 315.53 | 7.22 |
| -10 | -1 | 5  | 316.83 | 6.90 |
| -10 | -1 | 6  | 63.30  | 3.07 |

## CIF 31

|     |    |    |        |      |
|-----|----|----|--------|------|
| -10 | -1 | 6  | 63.62  | 3.17 |
| -10 | -1 | 7  | 19.06  | 1.94 |
| -10 | -1 | 7  | 16.54  | 1.77 |
| -10 | -1 | 8  | 55.73  | 2.94 |
| -10 | -1 | 8  | 59.71  | 2.95 |
| -10 | -1 | 9  | 0.43   | 0.97 |
| -10 | -1 | 9  | 1.25   | 1.01 |
| -10 | -1 | 10 | 8.46   | 1.31 |
| -10 | -1 | 10 | 8.05   | 1.18 |
| -10 | -1 | 11 | 32.25  | 1.77 |
| -10 | 0  | -3 | 259.11 | 3.79 |
| -10 | 0  | -2 | 2.08   | 0.62 |
| -10 | 0  | -1 | 94.02  | 2.53 |
| -10 | 0  | -1 | 92.39  | 2.46 |
| -10 | 0  | -1 | 97.08  | 2.72 |
| -10 | 0  | 0  | 10.26  | 1.08 |
| -10 | 0  | 0  | 9.18   | 1.10 |
| -10 | 0  | 0  | 10.61  | 1.13 |
| -10 | 0  | 0  | 8.50   | 0.96 |
| -10 | 0  | 1  | 221.55 | 4.70 |
| -10 | 0  | 1  | 205.85 | 4.38 |
| -10 | 0  | 1  | 213.62 | 4.33 |
| -10 | 0  | 1  | 228.05 | 4.83 |
| -10 | 0  | 2  | 70.31  | 2.51 |
| -10 | 0  | 2  | 71.20  | 2.76 |
| -10 | 0  | 2  | 72.98  | 2.78 |
| -10 | 0  | 2  | 69.16  | 2.41 |
| -10 | 0  | 3  | 2.65   | 0.70 |
| -10 | 0  | 3  | 3.81   | 1.24 |
| -10 | 0  | 3  | 3.45   | 0.94 |
| -10 | 0  | 3  | 3.47   | 1.05 |
| -10 | 0  | 4  | 19.59  | 2.04 |
| -10 | 0  | 4  | 16.91  | 1.92 |
| -10 | 0  | 4  | 15.35  | 1.66 |
| -10 | 0  | 4  | 19.61  | 1.49 |
| -10 | 0  | 5  | 115.55 | 4.23 |
| -10 | 0  | 5  | 119.41 | 4.52 |
| -10 | 0  | 5  | 127.38 | 3.50 |
| -10 | 0  | 6  | 111.09 | 4.42 |
| -10 | 0  | 6  | 97.98  | 3.99 |
| -10 | 0  | 7  | 8.08   | 1.65 |

## CIF 31

|     |   |    |        |      |
|-----|---|----|--------|------|
| -10 | 0 | 7  | 7.76   | 1.44 |
| -10 | 0 | 8  | 108.64 | 4.09 |
| -10 | 0 | 9  | 77.94  | 3.37 |
| -10 | 0 | 10 | 38.46  | 1.48 |
| -10 | 0 | 10 | 41.65  | 2.38 |
| -10 | 0 | 11 | 3.32   | 0.98 |
| -10 | 0 | 12 | 73.99  | 2.42 |
| -10 | 1 | -3 | 1.19   | 0.60 |
| -10 | 1 | -3 | 0.93   | 0.52 |
| -10 | 1 | -3 | 1.28   | 0.52 |
| -10 | 1 | -2 | 44.49  | 1.92 |
| -10 | 1 | -2 | 43.96  | 1.81 |
| -10 | 1 | -1 | 267.89 | 5.14 |
| -10 | 1 | -1 | 252.56 | 4.91 |
| -10 | 1 | -1 | 257.68 | 5.01 |
| -10 | 1 | -1 | 264.15 | 5.06 |
| -10 | 1 | 0  | 67.03  | 2.67 |
| -10 | 1 | 0  | 69.64  | 2.64 |
| -10 | 1 | 0  | 70.08  | 2.73 |
| -10 | 1 | 0  | 66.72  | 2.54 |
| -10 | 1 | 1  | 9.18   | 1.24 |
| -10 | 1 | 1  | 7.98   | 1.26 |
| -10 | 1 | 1  | 8.63   | 1.11 |
| -10 | 1 | 1  | 8.73   | 1.40 |
| -10 | 1 | 1  | 9.27   | 1.38 |
| -10 | 1 | 2  | 156.55 | 5.05 |
| -10 | 1 | 2  | 155.16 | 4.20 |
| -10 | 1 | 2  | 163.59 | 4.44 |
| -10 | 1 | 2  | 148.01 | 3.69 |
| -10 | 1 | 3  | 129.43 | 3.86 |
| -10 | 1 | 3  | 137.74 | 4.91 |
| -10 | 1 | 4  | 21.70  | 2.18 |
| -10 | 1 | 4  | 17.52  | 1.78 |
| -10 | 1 | 4  | 25.26  | 1.89 |
| -10 | 1 | 4  | 24.76  | 1.80 |
| -10 | 1 | 4  | 19.03  | 2.04 |
| -10 | 1 | 5  | -0.46  | 0.91 |
| -10 | 1 | 5  | 0.86   | 1.08 |
| -10 | 1 | 5  | 0.69   | 1.01 |
| -10 | 1 | 6  | 89.68  | 4.03 |
| -10 | 1 | 6  | 93.65  | 4.00 |

## CIF 31

|     |   |    |        |      |
|-----|---|----|--------|------|
| -10 | 1 | 6  | 82.31  | 3.99 |
| -10 | 1 | 6  | 85.71  | 3.72 |
| -10 | 1 | 7  | 80.85  | 3.96 |
| -10 | 1 | 7  | 77.22  | 3.77 |
| -10 | 1 | 7  | 88.57  | 3.76 |
| -10 | 1 | 7  | 75.09  | 3.41 |
| -10 | 1 | 7  | 80.82  | 3.66 |
| -10 | 1 | 8  | 118.98 | 4.61 |
| -10 | 1 | 8  | 135.31 | 4.71 |
| -10 | 1 | 8  | 134.68 | 4.63 |
| -10 | 1 | 8  | 123.74 | 4.30 |
| -10 | 1 | 9  | 33.63  | 2.42 |
| -10 | 1 | 9  | 35.39  | 2.25 |
| -10 | 1 | 9  | 37.86  | 1.67 |
| -10 | 1 | 9  | 31.71  | 2.21 |
| -10 | 1 | 9  | 39.90  | 2.47 |
| -10 | 1 | 10 | 0.24   | 0.70 |
| -10 | 1 | 10 | -0.11  | 0.89 |
| -10 | 1 | 10 | 0.78   | 0.84 |
| -10 | 1 | 11 | 102.59 | 3.46 |
| -10 | 1 | 11 | 88.78  | 2.98 |
| -10 | 1 | 12 | 9.44   | 1.07 |
| -10 | 2 | -4 | 4.00   | 0.67 |
| -10 | 2 | -4 | 3.77   | 0.71 |
| -10 | 2 | -4 | 3.65   | 0.53 |
| -10 | 2 | -4 | 3.83   | 0.69 |
| -10 | 2 | -3 | 11.42  | 1.10 |
| -10 | 2 | -3 | 11.85  | 1.13 |
| -10 | 2 | -3 | 10.65  | 1.16 |
| -10 | 2 | -2 | 127.92 | 3.49 |
| -10 | 2 | -2 | 123.52 | 3.40 |
| -10 | 2 | -2 | 133.21 | 3.57 |
| -10 | 2 | -1 | 211.64 | 4.89 |
| -10 | 2 | -1 | 218.27 | 4.77 |
| -10 | 2 | -1 | 229.42 | 5.06 |
| -10 | 2 | -1 | 212.76 | 4.87 |
| -10 | 2 | 0  | 51.62  | 2.56 |
| -10 | 2 | 0  | 51.79  | 2.52 |
| -10 | 2 | 0  | 46.97  | 2.23 |
| -10 | 2 | 0  | 47.54  | 2.61 |
| -10 | 2 | 0  | 50.91  | 2.48 |

## CIF 31

|     |   |   |        |       |
|-----|---|---|--------|-------|
| -10 | 2 | 1 | 13.72  | 1.31  |
| -10 | 2 | 1 | 15.72  | 1.70  |
| -10 | 2 | 1 | 13.52  | 1.55  |
| -10 | 2 | 1 | 13.24  | 1.71  |
| -10 | 2 | 2 | 419.91 | 6.68  |
| -10 | 2 | 2 | 423.68 | 7.71  |
| -10 | 2 | 2 | 443.90 | 9.04  |
| -10 | 2 | 3 | 2.32   | 1.40  |
| -10 | 2 | 3 | 3.49   | 1.06  |
| -10 | 2 | 3 | 2.74   | 1.15  |
| -10 | 2 | 3 | 1.80   | 1.08  |
| -10 | 2 | 4 | 630.95 | 9.67  |
| -10 | 2 | 4 | 515.28 | 11.01 |
| -10 | 2 | 4 | 646.76 | 9.83  |
| -10 | 2 | 4 | 603.36 | 11.30 |
| -10 | 2 | 4 | 564.07 | 11.49 |
| -10 | 2 | 4 | 574.66 | 10.43 |
| -10 | 2 | 5 | 41.02  | 2.55  |
| -10 | 2 | 5 | 43.83  | 3.16  |
| -10 | 2 | 5 | 42.75  | 2.81  |
| -10 | 2 | 5 | 43.27  | 3.10  |
| -10 | 2 | 6 | 169.51 | 5.90  |
| -10 | 2 | 6 | 193.09 | 4.62  |
| -10 | 2 | 6 | 166.46 | 5.16  |
| -10 | 2 | 6 | 189.69 | 5.79  |
| -10 | 2 | 6 | 163.36 | 5.86  |
| -10 | 2 | 6 | 154.29 | 4.87  |
| -10 | 2 | 7 | 18.11  | 1.78  |
| -10 | 2 | 7 | 18.94  | 1.94  |
| -10 | 2 | 7 | 22.60  | 1.58  |
| -10 | 2 | 7 | 16.14  | 2.04  |
| -10 | 2 | 7 | 19.34  | 1.95  |
| -10 | 2 | 8 | 309.00 | 7.06  |
| -10 | 2 | 8 | 345.48 | 5.64  |
| -10 | 2 | 8 | 347.14 | 7.22  |
| -10 | 2 | 8 | 316.04 | 7.29  |
| -10 | 2 | 8 | 329.89 | 8.06  |
| -10 | 2 | 8 | 309.84 | 7.63  |
| -10 | 2 | 9 | 5.54   | 1.05  |
| -10 | 2 | 9 | 6.92   | 1.49  |
| -10 | 2 | 9 | 4.98   | 1.09  |



## CIF 31

|     |   |    |        |      |
|-----|---|----|--------|------|
| -10 | 2 | 9  | 5.17   | 1.26 |
| -10 | 2 | 9  | 6.11   | 1.34 |
| -10 | 2 | 10 | 9.98   | 1.42 |
| -10 | 2 | 10 | 9.48   | 1.35 |
| -10 | 2 | 10 | 10.35  | 1.50 |
| -10 | 2 | 11 | 52.75  | 2.44 |
| -10 | 2 | 11 | 51.53  | 2.16 |
| -10 | 2 | 12 | 1.75   | 0.71 |
| -10 | 3 | -5 | 4.66   | 0.62 |
| -10 | 3 | -5 | 3.52   | 0.46 |
| -10 | 3 | -5 | 3.77   | 0.64 |
| -10 | 3 | -4 | 227.79 | 4.34 |
| -10 | 3 | -4 | 224.24 | 4.09 |
| -10 | 3 | -4 | 231.23 | 4.34 |
| -10 | 3 | -4 | 223.29 | 4.21 |
| -10 | 3 | -3 | 35.89  | 1.94 |
| -10 | 3 | -3 | 34.33  | 1.80 |
| -10 | 3 | -2 | 111.52 | 3.43 |
| -10 | 3 | -2 | 108.21 | 3.28 |
| -10 | 3 | -2 | 109.38 | 3.49 |
| -10 | 3 | -1 | 33.42  | 2.13 |
| -10 | 3 | -1 | 35.90  | 2.21 |
| -10 | 3 | -1 | 33.40  | 1.93 |
| -10 | 3 | -1 | 30.73  | 2.04 |
| -10 | 3 | -1 | 34.38  | 2.15 |
| -10 | 3 | 0  | 187.93 | 5.48 |
| -10 | 3 | 0  | 192.60 | 4.56 |
| -10 | 3 | 0  | 195.54 | 5.07 |
| -10 | 3 | 1  | 0.77   | 1.15 |
| -10 | 3 | 1  | 0.49   | 1.08 |
| -10 | 3 | 1  | 0.90   | 1.09 |
| -10 | 3 | 1  | 0.67   | 0.74 |
| -10 | 3 | 2  | 29.42  | 2.03 |
| -10 | 3 | 2  | 28.59  | 2.12 |
| -10 | 3 | 2  | 26.01  | 2.44 |
| -10 | 3 | 3  | 12.00  | 1.55 |
| -10 | 3 | 3  | 10.65  | 1.90 |
| -10 | 3 | 3  | 10.89  | 1.42 |
| -10 | 3 | 3  | 11.16  | 1.81 |
| -10 | 3 | 3  | 10.31  | 1.89 |
| -10 | 3 | 4  | 9.18   | 1.68 |

## CIF 31

|     |   |    |       |      |
|-----|---|----|-------|------|
| -10 | 3 | 4  | 13.55 | 1.61 |
| -10 | 3 | 4  | 13.04 | 2.08 |
| -10 | 3 | 4  | 8.04  | 1.27 |
| -10 | 3 | 5  | 2.97  | 1.51 |
| -10 | 3 | 5  | 4.10  | 1.03 |
| -10 | 3 | 5  | 2.63  | 1.68 |
| -10 | 3 | 5  | 3.70  | 1.48 |
| -10 | 3 | 5  | 2.61  | 1.41 |
| -10 | 3 | 6  | 39.02 | 2.02 |
| -10 | 3 | 6  | 39.01 | 2.97 |
| -10 | 3 | 6  | 37.48 | 2.76 |
| -10 | 3 | 6  | 37.89 | 3.43 |
| -10 | 3 | 6  | 36.04 | 2.31 |
| -10 | 3 | 6  | 37.39 | 2.42 |
| -10 | 3 | 6  | 34.99 | 2.06 |
| -10 | 3 | 7  | 54.52 | 3.05 |
| -10 | 3 | 7  | 48.57 | 2.40 |
| -10 | 3 | 7  | 49.90 | 3.31 |
| -10 | 3 | 7  | 51.20 | 2.09 |
| -10 | 3 | 7  | 48.29 | 2.68 |
| -10 | 3 | 7  | 53.73 | 2.93 |
| -10 | 3 | 7  | 52.13 | 3.33 |
| -10 | 3 | 7  | 51.15 | 3.33 |
| -10 | 3 | 8  | 21.87 | 1.85 |
| -10 | 3 | 8  | 24.29 | 1.98 |
| -10 | 3 | 8  | 25.07 | 2.35 |
| -10 | 3 | 8  | 22.23 | 1.63 |
| -10 | 3 | 8  | 24.08 | 2.27 |
| -10 | 3 | 8  | 25.91 | 2.12 |
| -10 | 3 | 9  | 6.61  | 1.38 |
| -10 | 3 | 9  | 6.40  | 1.33 |
| -10 | 3 | 9  | 7.74  | 1.19 |
| -10 | 3 | 9  | 7.69  | 1.09 |
| -10 | 3 | 9  | 8.93  | 1.57 |
| -10 | 3 | 10 | 3.47  | 1.10 |
| -10 | 3 | 10 | 3.45  | 1.10 |
| -10 | 3 | 11 | 70.41 | 2.62 |
| -10 | 3 | 11 | 68.24 | 2.81 |
| -10 | 3 | 12 | 20.88 | 1.37 |
| -10 | 4 | -5 | 0.28  | 0.61 |
| -10 | 4 | -5 | 0.88  | 0.53 |

## CIF 31

|     |   |    |        |       |
|-----|---|----|--------|-------|
| -10 | 4 | -5 | 0.22   | 0.63  |
| -10 | 4 | -4 | 3.42   | 0.95  |
| -10 | 4 | -4 | 2.88   | 0.93  |
| -10 | 4 | -4 | 2.86   | 0.85  |
| -10 | 4 | -4 | 3.17   | 0.82  |
| -10 | 4 | -3 | 110.79 | 3.40  |
| -10 | 4 | -3 | 117.51 | 3.32  |
| -10 | 4 | -2 | 318.43 | 5.98  |
| -10 | 4 | -1 | 51.65  | 2.73  |
| -10 | 4 | -1 | 54.78  | 2.68  |
| -10 | 4 | -1 | 53.05  | 2.38  |
| -10 | 4 | 0  | 199.66 | 5.79  |
| -10 | 4 | 0  | 224.51 | 5.33  |
| -10 | 4 | 0  | 224.87 | 5.44  |
| -10 | 4 | 0  | 207.18 | 4.73  |
| -10 | 4 | 1  | 11.93  | 1.21  |
| -10 | 4 | 1  | 12.16  | 1.77  |
| -10 | 4 | 1  | 11.03  | 1.41  |
| -10 | 4 | 1  | 10.13  | 1.44  |
| -10 | 4 | 2  | 175.87 | 4.84  |
| -10 | 4 | 2  | 140.66 | 5.36  |
| -10 | 4 | 2  | 166.31 | 5.70  |
| -10 | 4 | 2  | 159.72 | 4.49  |
| -10 | 4 | 2  | 139.81 | 5.15  |
| -10 | 4 | 3  | 126.00 | 3.88  |
| -10 | 4 | 3  | 125.06 | 4.97  |
| -10 | 4 | 3  | 92.42  | 4.83  |
| -10 | 4 | 3  | 102.96 | 4.68  |
| -10 | 4 | 3  | 103.35 | 4.53  |
| -10 | 4 | 4  | 644.22 | 9.35  |
| -10 | 4 | 4  | 528.82 | 12.26 |
| -10 | 4 | 4  | 587.11 | 11.93 |
| -10 | 4 | 4  | 589.52 | 11.55 |
| -10 | 4 | 4  | 578.36 | 11.66 |
| -10 | 4 | 5  | 81.49  | 4.25  |
| -10 | 4 | 5  | 79.19  | 4.59  |
| -10 | 4 | 5  | 88.41  | 4.21  |
| -10 | 4 | 5  | 74.18  | 4.08  |
| -10 | 4 | 5  | 77.85  | 4.02  |
| -10 | 4 | 5  | 89.25  | 3.01  |
| -10 | 4 | 6  | 55.98  | 3.93  |

## CIF 31

|     |   |    |        |      |
|-----|---|----|--------|------|
| -10 | 4 | 6  | 53.20  | 2.11 |
| -10 | 4 | 6  | 52.58  | 2.65 |
| -10 | 4 | 6  | 57.83  | 3.27 |
| -10 | 4 | 6  | 53.63  | 3.47 |
| -10 | 4 | 6  | 57.38  | 3.54 |
| -10 | 4 | 7  | 160.03 | 4.74 |
| -10 | 4 | 7  | 173.93 | 5.27 |
| -10 | 4 | 7  | 153.47 | 5.57 |
| -10 | 4 | 7  | 172.46 | 4.68 |
| -10 | 4 | 8  | 30.21  | 2.50 |
| -10 | 4 | 8  | 31.88  | 2.93 |
| -10 | 4 | 8  | 34.39  | 2.64 |
| -10 | 4 | 8  | 30.67  | 2.47 |
| -10 | 4 | 8  | 34.20  | 2.23 |
| -10 | 4 | 8  | 29.04  | 1.92 |
| -10 | 4 | 8  | 30.19  | 2.51 |
| -10 | 4 | 9  | 18.37  | 1.93 |
| -10 | 4 | 9  | 16.40  | 2.09 |
| -10 | 4 | 9  | 16.69  | 1.83 |
| -10 | 4 | 10 | 47.61  | 2.63 |
| -10 | 4 | 10 | 48.04  | 2.58 |
| -10 | 4 | 10 | 43.14  | 2.48 |
| -10 | 4 | 11 | 35.47  | 1.90 |
| -10 | 4 | 11 | 38.03  | 2.05 |
| -10 | 5 | -5 | 10.15  | 0.95 |
| -10 | 5 | -5 | 11.32  | 1.08 |
| -10 | 5 | -4 | 12.95  | 1.23 |
| -10 | 5 | -4 | 11.74  | 1.23 |
| -10 | 5 | -3 | 18.32  | 1.58 |
| -10 | 5 | -3 | 18.48  | 1.62 |
| -10 | 5 | -2 | 3.40   | 1.08 |
| -10 | 5 | -2 | 3.55   | 1.06 |
| -10 | 5 | -2 | 1.91   | 0.89 |
| -10 | 5 | -2 | 3.72   | 1.08 |
| -10 | 5 | -1 | 0.61   | 0.85 |
| -10 | 5 | -1 | 0.91   | 0.98 |
| -10 | 5 | -1 | 1.56   | 1.04 |
| -10 | 5 | -1 | 1.53   | 1.04 |
| -10 | 5 | 0  | 292.64 | 6.16 |
| -10 | 5 | 0  | 271.23 | 5.40 |
| -10 | 5 | 0  | 292.74 | 6.32 |

## CIF 31

|     |   |   |        |      |
|-----|---|---|--------|------|
| -10 | 5 | 0 | 273.09 | 7.03 |
| -10 | 5 | 0 | 300.73 | 6.23 |
| -10 | 5 | 1 | 24.73  | 2.39 |
| -10 | 5 | 1 | 27.09  | 2.02 |
| -10 | 5 | 1 | 21.30  | 2.19 |
| -10 | 5 | 1 | 26.65  | 1.96 |
| -10 | 5 | 1 | 26.22  | 1.92 |
| -10 | 5 | 2 | 3.43   | 1.21 |
| -10 | 5 | 2 | 1.35   | 1.05 |
| -10 | 5 | 2 | 0.39   | 1.21 |
| -10 | 5 | 2 | 2.20   | 0.95 |
| -10 | 5 | 2 | 4.25   | 1.52 |
| -10 | 5 | 2 | 2.95   | 1.29 |
| -10 | 5 | 2 | 1.65   | 0.92 |
| -10 | 5 | 3 | 109.55 | 4.86 |
| -10 | 5 | 3 | 102.05 | 4.96 |
| -10 | 5 | 3 | 110.93 | 4.75 |
| -10 | 5 | 3 | 112.92 | 4.89 |
| -10 | 5 | 3 | 109.91 | 4.55 |
| -10 | 5 | 3 | 131.40 | 3.92 |
| -10 | 5 | 3 | 123.52 | 3.69 |
| -10 | 5 | 3 | 139.08 | 4.24 |
| -10 | 5 | 4 | 24.77  | 2.43 |
| -10 | 5 | 4 | 17.00  | 2.20 |
| -10 | 5 | 4 | 20.68  | 1.50 |
| -10 | 5 | 4 | 25.25  | 2.54 |
| -10 | 5 | 4 | 25.13  | 2.84 |
| -10 | 5 | 4 | 25.96  | 2.54 |
| -10 | 5 | 5 | 59.44  | 3.53 |
| -10 | 5 | 5 | 53.81  | 3.28 |
| -10 | 5 | 5 | 55.67  | 3.87 |
| -10 | 5 | 5 | 55.64  | 3.51 |
| -10 | 5 | 5 | 53.65  | 3.31 |
| -10 | 5 | 5 | 53.98  | 3.29 |
| -10 | 5 | 5 | 52.17  | 2.28 |
| -10 | 5 | 6 | 50.48  | 3.02 |
| -10 | 5 | 6 | 43.71  | 3.03 |
| -10 | 5 | 6 | 43.39  | 3.06 |
| -10 | 5 | 6 | 44.58  | 3.14 |
| -10 | 5 | 6 | 45.83  | 3.64 |
| -10 | 5 | 6 | 52.38  | 2.66 |

## CIF 31

|     |   |    |        |      |
|-----|---|----|--------|------|
| -10 | 5 | 6  | 39.27  | 2.87 |
| -10 | 5 | 7  | 18.67  | 1.83 |
| -10 | 5 | 7  | 18.20  | 2.15 |
| -10 | 5 | 7  | 22.99  | 2.27 |
| -10 | 5 | 7  | 19.64  | 1.67 |
| -10 | 5 | 8  | 23.38  | 1.75 |
| -10 | 5 | 8  | 22.65  | 1.76 |
| -10 | 5 | 8  | 23.55  | 2.22 |
| -10 | 5 | 8  | 22.25  | 2.47 |
| -10 | 5 | 8  | 21.97  | 2.18 |
| -10 | 5 | 8  | 22.04  | 2.14 |
| -10 | 5 | 9  | 127.48 | 4.29 |
| -10 | 5 | 9  | 125.49 | 4.42 |
| -10 | 5 | 9  | 121.64 | 4.41 |
| -10 | 5 | 9  | 127.21 | 4.84 |
| -10 | 5 | 10 | 0.28   | 0.79 |
| -10 | 5 | 10 | 0.75   | 0.85 |
| -10 | 5 | 10 | 0.28   | 0.70 |
| -10 | 5 | 10 | -0.33  | 0.83 |
| -10 | 5 | 11 | 2.20   | 0.76 |
| -10 | 5 | 11 | 3.53   | 0.83 |
| -10 | 6 | -5 | -0.07  | 0.64 |
| -10 | 6 | -5 | 0.26   | 0.57 |
| -10 | 6 | -5 | 0.20   | 0.61 |
| -10 | 6 | -4 | 86.67  | 2.79 |
| -10 | 6 | -4 | 95.81  | 2.86 |
| -10 | 6 | -3 | 89.04  | 2.55 |
| -10 | 6 | -3 | 93.29  | 3.06 |
| -10 | 6 | -2 | 0.97   | 0.88 |
| -10 | 6 | -2 | 0.35   | 0.63 |
| -10 | 6 | -2 | 0.90   | 0.82 |
| -10 | 6 | -1 | 134.68 | 3.46 |
| -10 | 6 | -1 | 140.27 | 3.92 |
| -10 | 6 | -1 | 135.35 | 4.56 |
| -10 | 6 | -1 | 142.03 | 4.07 |
| -10 | 6 | 0  | 27.65  | 1.65 |
| -10 | 6 | 0  | 27.79  | 2.37 |
| -10 | 6 | 0  | 26.04  | 1.82 |
| -10 | 6 | 0  | 25.47  | 1.87 |
| -10 | 6 | 1  | 150.08 | 3.76 |
| -10 | 6 | 1  | 122.49 | 4.88 |

## CIF 31

|     |   |   |        |       |
|-----|---|---|--------|-------|
| -10 | 6 | 1 | 129.43 | 4.62  |
| -10 | 6 | 1 | 141.67 | 4.00  |
| -10 | 6 | 1 | 139.02 | 5.21  |
| -10 | 6 | 1 | 152.32 | 4.30  |
| -10 | 6 | 2 | 9.94   | 1.43  |
| -10 | 6 | 2 | 12.05  | 1.33  |
| -10 | 6 | 2 | 9.86   | 1.89  |
| -10 | 6 | 2 | 12.19  | 1.48  |
| -10 | 6 | 2 | 11.35  | 1.72  |
| -10 | 6 | 2 | 9.71   | 1.59  |
| -10 | 6 | 2 | 10.63  | 1.85  |
| -10 | 6 | 3 | 20.86  | 1.70  |
| -10 | 6 | 3 | 17.42  | 2.04  |
| -10 | 6 | 3 | 14.25  | 2.24  |
| -10 | 6 | 3 | 15.34  | 1.81  |
| -10 | 6 | 3 | 16.85  | 1.43  |
| -10 | 6 | 3 | 15.94  | 1.94  |
| -10 | 6 | 4 | 47.49  | 3.14  |
| -10 | 6 | 4 | 46.84  | 2.15  |
| -10 | 6 | 4 | 46.92  | 3.04  |
| -10 | 6 | 4 | 47.80  | 3.29  |
| -10 | 6 | 4 | 46.07  | 2.06  |
| -10 | 6 | 4 | 47.22  | 3.10  |
| -10 | 6 | 4 | 47.17  | 3.00  |
| -10 | 6 | 4 | 44.29  | 3.43  |
| -10 | 6 | 5 | 452.55 | 9.40  |
| -10 | 6 | 5 | 447.10 | 10.65 |
| -10 | 6 | 5 | 455.83 | 9.68  |
| -10 | 6 | 5 | 451.44 | 9.85  |
| -10 | 6 | 5 | 447.94 | 9.41  |
| -10 | 6 | 5 | 445.79 | 9.57  |
| -10 | 6 | 6 | 6.89   | 1.13  |
| -10 | 6 | 6 | 8.65   | 1.45  |
| -10 | 6 | 6 | 7.19   | 1.64  |
| -10 | 6 | 6 | 8.20   | 1.56  |
| -10 | 6 | 6 | 8.24   | 1.63  |
| -10 | 6 | 6 | 7.65   | 1.61  |
| -10 | 6 | 6 | 9.54   | 2.07  |
| -10 | 6 | 7 | 16.91  | 1.68  |
| -10 | 6 | 7 | 15.40  | 1.92  |
| -10 | 6 | 7 | 15.64  | 1.95  |

## CIF 31

|     |   |    |        |      |
|-----|---|----|--------|------|
| -10 | 6 | 7  | 17.09  | 1.96 |
| -10 | 6 | 7  | 16.89  | 1.53 |
| -10 | 6 | 7  | 16.26  | 1.93 |
| -10 | 6 | 8  | 16.00  | 1.82 |
| -10 | 6 | 8  | 16.01  | 1.85 |
| -10 | 6 | 8  | 17.84  | 2.14 |
| -10 | 6 | 8  | 13.98  | 1.27 |
| -10 | 6 | 9  | 160.48 | 4.79 |
| -10 | 6 | 9  | 163.06 | 4.81 |
| -10 | 6 | 9  | 152.80 | 5.02 |
| -10 | 6 | 9  | 158.76 | 4.57 |
| -10 | 6 | 10 | 52.20  | 2.40 |
| -10 | 6 | 10 | 50.57  | 2.25 |
| -10 | 6 | 11 | 0.43   | 0.48 |
| -10 | 7 | -5 | 7.31   | 0.81 |
| -10 | 7 | -5 | 6.87   | 0.66 |
| -10 | 7 | -5 | 7.02   | 0.72 |
| -10 | 7 | -4 | 15.16  | 1.24 |
| -10 | 7 | -4 | 14.18  | 1.05 |
| -10 | 7 | -4 | 12.66  | 1.08 |
| -10 | 7 | -4 | 13.83  | 1.17 |
| -10 | 7 | -3 | 21.55  | 1.49 |
| -10 | 7 | -3 | 21.89  | 1.56 |
| -10 | 7 | -3 | 21.29  | 1.35 |
| -10 | 7 | -3 | 21.91  | 1.47 |
| -10 | 7 | -2 | 91.23  | 2.80 |
| -10 | 7 | -2 | 93.83  | 3.02 |
| -10 | 7 | -2 | 98.11  | 3.16 |
| -10 | 7 | -2 | 89.59  | 3.32 |
| -10 | 7 | -2 | 87.68  | 2.92 |
| -10 | 7 | -1 | 250.37 | 4.95 |
| -10 | 7 | -1 | 254.63 | 5.23 |
| -10 | 7 | 0  | 21.14  | 1.61 |
| -10 | 7 | 0  | 17.41  | 1.98 |
| -10 | 7 | 0  | 20.58  | 1.54 |
| -10 | 7 | 0  | 19.84  | 1.45 |
| -10 | 7 | 1  | 365.82 | 8.49 |
| -10 | 7 | 1  | 420.84 | 6.64 |
| -10 | 7 | 1  | 486.56 | 7.39 |
| -10 | 7 | 1  | 428.48 | 9.30 |
| -10 | 7 | 1  | 371.13 | 7.66 |



## CIF 31

|     |   |   |        |      |
|-----|---|---|--------|------|
| -10 | 7 | 1 | 447.17 | 7.31 |
| -10 | 7 | 2 | 3.77   | 0.99 |
| -10 | 7 | 2 | 5.71   | 1.26 |
| -10 | 7 | 2 | 4.38   | 1.45 |
| -10 | 7 | 2 | 6.00   | 1.33 |
| -10 | 7 | 2 | 6.67   | 1.63 |
| -10 | 7 | 3 | 312.66 | 8.36 |
| -10 | 7 | 3 | 319.64 | 7.68 |
| -10 | 7 | 3 | 324.61 | 7.56 |
| -10 | 7 | 3 | 306.05 | 6.92 |
| -10 | 7 | 4 | 29.93  | 2.87 |
| -10 | 7 | 4 | 39.87  | 2.02 |
| -10 | 7 | 4 | 30.78  | 2.49 |
| -10 | 7 | 4 | 36.69  | 2.76 |
| -10 | 7 | 4 | 34.17  | 2.41 |
| -10 | 7 | 4 | 34.72  | 2.57 |
| -10 | 7 | 4 | 34.38  | 2.55 |
| -10 | 7 | 5 | 41.08  | 2.69 |
| -10 | 7 | 5 | 40.08  | 2.73 |
| -10 | 7 | 5 | 42.82  | 2.82 |
| -10 | 7 | 5 | 39.14  | 2.73 |
| -10 | 7 | 5 | 41.66  | 3.25 |
| -10 | 7 | 5 | 41.60  | 2.76 |
| -10 | 7 | 5 | 38.68  | 2.80 |
| -10 | 7 | 5 | 43.39  | 2.02 |
| -10 | 7 | 6 | 5.98   | 1.26 |
| -10 | 7 | 6 | 5.33   | 1.25 |
| -10 | 7 | 6 | 4.43   | 1.30 |
| -10 | 7 | 6 | 4.50   | 1.26 |
| -10 | 7 | 6 | 6.99   | 1.39 |
| -10 | 7 | 6 | 5.32   | 1.73 |
| -10 | 7 | 6 | 4.59   | 1.34 |
| -10 | 7 | 7 | 30.99  | 2.32 |
| -10 | 7 | 7 | 28.94  | 2.21 |
| -10 | 7 | 7 | 29.61  | 2.20 |
| -10 | 7 | 7 | 31.36  | 2.26 |
| -10 | 7 | 7 | 29.82  | 1.89 |
| -10 | 7 | 7 | 27.24  | 2.24 |
| -10 | 7 | 8 | 0.49   | 0.99 |
| -10 | 7 | 8 | -0.64  | 0.95 |
| -10 | 7 | 8 | -0.60  | 0.88 |

## CIF 31

|     |   |    |        |      |
|-----|---|----|--------|------|
| -10 | 7 | 8  | 0.28   | 1.06 |
| -10 | 7 | 8  | 0.47   | 0.92 |
| -10 | 7 | 9  | 30.50  | 1.90 |
| -10 | 7 | 9  | 31.88  | 1.94 |
| -10 | 7 | 9  | 28.51  | 2.03 |
| -10 | 7 | 9  | 30.71  | 1.95 |
| -10 | 7 | 10 | 1.86   | 0.62 |
| -10 | 8 | -5 | 0.45   | 0.83 |
| -10 | 8 | -5 | 0.72   | 0.41 |
| -10 | 8 | -4 | 65.51  | 1.73 |
| -10 | 8 | -4 | 86.81  | 2.41 |
| -10 | 8 | -4 | 70.85  | 1.94 |
| -10 | 8 | -4 | 82.55  | 2.30 |
| -10 | 8 | -3 | 75.06  | 2.44 |
| -10 | 8 | -3 | 69.54  | 2.07 |
| -10 | 8 | -3 | 78.18  | 2.44 |
| -10 | 8 | -3 | 73.62  | 2.12 |
| -10 | 8 | -2 | 119.91 | 2.83 |
| -10 | 8 | -2 | 133.08 | 3.40 |
| -10 | 8 | -2 | 129.20 | 3.29 |
| -10 | 8 | -2 | 118.53 | 2.94 |
| -10 | 8 | -2 | 127.01 | 3.85 |
| -10 | 8 | -1 | 150.29 | 3.44 |
| -10 | 8 | -1 | 137.61 | 4.45 |
| -10 | 8 | -1 | 143.51 | 3.50 |
| -10 | 8 | 0  | 32.89  | 1.68 |
| -10 | 8 | 0  | 30.35  | 1.58 |
| -10 | 8 | 0  | 36.19  | 1.90 |
| -10 | 8 | 0  | 33.65  | 2.52 |
| -10 | 8 | 1  | 6.15   | 1.56 |
| -10 | 8 | 1  | 6.35   | 0.94 |
| -10 | 8 | 1  | 4.92   | 1.35 |
| -10 | 8 | 2  | 432.79 | 9.30 |
| -10 | 8 | 2  | 451.33 | 7.95 |
| -10 | 8 | 2  | 426.23 | 8.27 |
| -10 | 8 | 2  | 459.36 | 6.68 |
| -10 | 8 | 2  | 476.04 | 9.56 |
| -10 | 8 | 3  | 6.43   | 1.67 |
| -10 | 8 | 3  | 7.72   | 1.35 |
| -10 | 8 | 3  | 6.02   | 1.23 |
| -10 | 8 | 3  | 7.31   | 1.61 |

## CIF 31

|     |   |    |        |      |
|-----|---|----|--------|------|
| -10 | 8 | 3  | 5.70   | 0.87 |
| -10 | 8 | 4  | 108.87 | 4.02 |
| -10 | 8 | 4  | 98.26  | 4.51 |
| -10 | 8 | 4  | 111.89 | 4.37 |
| -10 | 8 | 4  | 118.07 | 2.81 |
| -10 | 8 | 4  | 108.68 | 4.20 |
| -10 | 8 | 4  | 114.66 | 4.41 |
| -10 | 8 | 4  | 113.80 | 4.05 |
| -10 | 8 | 5  | 57.74  | 3.10 |
| -10 | 8 | 5  | 51.62  | 3.28 |
| -10 | 8 | 5  | 60.01  | 3.06 |
| -10 | 8 | 5  | 56.76  | 2.93 |
| -10 | 8 | 5  | 55.69  | 2.74 |
| -10 | 8 | 5  | 60.47  | 2.98 |
| -10 | 8 | 5  | 51.69  | 2.83 |
| -10 | 8 | 6  | 279.39 | 6.15 |
| -10 | 8 | 6  | 279.73 | 6.58 |
| -10 | 8 | 6  | 289.33 | 6.39 |
| -10 | 8 | 6  | 293.07 | 6.46 |
| -10 | 8 | 6  | 280.93 | 7.42 |
| -10 | 8 | 6  | 289.98 | 6.04 |
| -10 | 8 | 7  | 48.12  | 2.47 |
| -10 | 8 | 7  | 49.86  | 2.46 |
| -10 | 8 | 7  | 46.93  | 2.53 |
| -10 | 8 | 7  | 48.95  | 2.51 |
| -10 | 8 | 8  | 79.75  | 2.84 |
| -10 | 8 | 8  | 73.99  | 3.16 |
| -10 | 8 | 8  | 78.81  | 2.81 |
| -10 | 8 | 8  | 78.40  | 2.89 |
| -10 | 8 | 9  | 0.17   | 0.54 |
| -10 | 8 | 9  | 0.23   | 0.56 |
| -10 | 9 | -4 | 53.01  | 1.72 |
| -10 | 9 | -4 | 39.73  | 1.56 |
| -10 | 9 | -3 | 8.73   | 0.94 |
| -10 | 9 | -3 | 7.44   | 0.97 |
| -10 | 9 | -2 | 26.75  | 1.72 |
| -10 | 9 | -2 | 23.66  | 1.24 |
| -10 | 9 | -1 | 137.63 | 4.27 |
| -10 | 9 | -1 | 160.87 | 3.69 |
| -10 | 9 | 0  | 106.46 | 4.01 |
| -10 | 9 | 0  | 119.04 | 3.22 |

## CIF 31

|     |    |    |        |      |
|-----|----|----|--------|------|
| -10 | 9  | 1  | 277.10 | 6.75 |
| -10 | 9  | 1  | 238.39 | 5.81 |
| -10 | 9  | 2  | 3.89   | 1.25 |
| -10 | 9  | 3  | 172.93 | 5.35 |
| -10 | 9  | 3  | 192.81 | 5.43 |
| -10 | 9  | 4  | 253.25 | 5.40 |
| -10 | 9  | 4  | 248.44 | 5.15 |
| -10 | 9  | 4  | 241.21 | 5.53 |
| -10 | 9  | 4  | 241.58 | 6.42 |
| -10 | 9  | 5  | 2.49   | 0.88 |
| -10 | 9  | 5  | 2.43   | 1.17 |
| -10 | 9  | 5  | 2.03   | 0.86 |
| -10 | 9  | 5  | 2.74   | 0.86 |
| -10 | 9  | 5  | 2.08   | 0.84 |
| -10 | 9  | 6  | 1.48   | 0.75 |
| -10 | 9  | 6  | 1.08   | 0.58 |
| -10 | 9  | 6  | 2.45   | 1.14 |
| -10 | 9  | 6  | 1.91   | 0.79 |
| -10 | 9  | 7  | 143.59 | 3.47 |
| -10 | 9  | 7  | 149.29 | 3.62 |
| -10 | 10 | -3 | 185.90 | 3.33 |
| -10 | 10 | -2 | 6.78   | 0.88 |
| -10 | 10 | -2 | 10.00  | 0.92 |
| -10 | 10 | -1 | 3.15   | 0.88 |
| -10 | 10 | -1 | 1.40   | 0.67 |
| -10 | 10 | 0  | 387.03 | 5.77 |
| -10 | 10 | 0  | 332.49 | 6.69 |
| -10 | 10 | 1  | 18.30  | 1.27 |
| -10 | 10 | 1  | 16.27  | 1.62 |
| -10 | 10 | 2  | 31.13  | 1.97 |
| -10 | 10 | 3  | 343.79 | 6.87 |
| -10 | 10 | 3  | 362.09 | 6.78 |
| -10 | 10 | 4  | 4.21   | 0.91 |
| -10 | 10 | 4  | 5.64   | 1.17 |
| -10 | 10 | 5  | 128.18 | 3.83 |
| -10 | 10 | 6  | 48.43  | 2.13 |
| -10 | 11 | -1 | 23.40  | 1.25 |
| -10 | 11 | 0  | 51.14  | 2.04 |
| -10 | 11 | 0  | 60.55  | 1.74 |
| -10 | 11 | 1  | 3.53   | 0.62 |
| -10 | 11 | 1  | 2.81   | 0.77 |

## CIF 31

|     |    |    |        |      |
|-----|----|----|--------|------|
| -10 | 11 | 2  | 409.32 | 5.15 |
| -10 | 11 | 2  | 350.01 | 5.80 |
| -9  | -5 | 4  | 3.70   | 0.49 |
| -9  | -5 | 5  | 4.34   | 0.59 |
| -9  | -5 | 5  | 2.43   | 0.41 |
| -9  | -5 | 6  | 46.76  | 1.55 |
| -9  | -5 | 6  | 47.10  | 1.42 |
| -9  | -5 | 7  | 224.75 | 3.60 |
| -9  | -5 | 8  | 90.14  | 1.96 |
| -9  | -4 | 1  | 104.42 | 2.32 |
| -9  | -4 | 2  | 36.96  | 1.49 |
| -9  | -4 | 3  | 0.06   | 0.45 |
| -9  | -4 | 3  | 0.07   | 0.49 |
| -9  | -4 | 3  | 0.42   | 0.50 |
| -9  | -4 | 4  | 5.92   | 0.84 |
| -9  | -4 | 4  | 6.02   | 0.79 |
| -9  | -4 | 4  | 4.04   | 0.62 |
| -9  | -4 | 5  | 8.11   | 0.98 |
| -9  | -4 | 6  | 112.56 | 3.18 |
| -9  | -4 | 6  | 117.38 | 3.90 |
| -9  | -4 | 7  | 6.86   | 1.23 |
| -9  | -4 | 7  | 7.00   | 1.00 |
| -9  | -4 | 7  | 7.58   | 1.29 |
| -9  | -4 | 8  | 36.49  | 1.80 |
| -9  | -4 | 8  | 38.57  | 2.15 |
| -9  | -4 | 9  | 274.56 | 4.16 |
| -9  | -4 | 9  | 272.05 | 5.37 |
| -9  | -4 | 10 | 4.81   | 0.88 |
| -9  | -4 | 10 | 4.80   | 0.84 |
| -9  | -4 | 10 | 4.69   | 0.72 |
| -9  | -3 | -1 | 0.56   | 0.32 |
| -9  | -3 | -1 | 0.79   | 0.52 |
| -9  | -3 | 0  | 62.34  | 1.65 |
| -9  | -3 | 0  | 87.04  | 2.45 |
| -9  | -3 | 1  | 2.29   | 0.72 |
| -9  | -3 | 1  | 1.95   | 0.55 |
| -9  | -3 | 2  | 32.45  | 1.61 |
| -9  | -3 | 2  | 29.52  | 1.60 |
| -9  | -3 | 2  | 29.81  | 1.55 |
| -9  | -3 | 3  | 41.26  | 1.94 |
| -9  | -3 | 3  | 41.75  | 1.95 |

## CIF 31

|    |    |    |        |      |
|----|----|----|--------|------|
| -9 | -3 | 3  | 40.38  | 1.87 |
| -9 | -3 | 4  | 62.09  | 2.46 |
| -9 | -3 | 4  | 57.02  | 2.10 |
| -9 | -3 | 5  | 245.05 | 5.35 |
| -9 | -3 | 5  | 251.25 | 6.52 |
| -9 | -3 | 6  | 74.92  | 2.92 |
| -9 | -3 | 6  | 77.33  | 3.58 |
| -9 | -3 | 7  | 67.48  | 2.82 |
| -9 | -3 | 7  | 71.66  | 3.43 |
| -9 | -3 | 7  | 67.96  | 2.56 |
| -9 | -3 | 7  | 74.15  | 2.67 |
| -9 | -3 | 8  | 149.55 | 4.20 |
| -9 | -3 | 8  | 174.51 | 5.14 |
| -9 | -3 | 8  | 165.72 | 4.33 |
| -9 | -3 | 8  | 159.68 | 5.01 |
| -9 | -3 | 8  | 175.99 | 3.92 |
| -9 | -3 | 8  | 154.66 | 3.89 |
| -9 | -3 | 9  | 107.69 | 3.85 |
| -9 | -3 | 9  | 106.44 | 3.35 |
| -9 | -3 | 9  | 105.98 | 3.36 |
| -9 | -3 | 9  | 110.36 | 2.79 |
| -9 | -3 | 10 | -0.03  | 0.86 |
| -9 | -3 | 10 | 0.13   | 0.67 |
| -9 | -3 | 10 | -0.39  | 0.86 |
| -9 | -3 | 10 | -0.10  | 0.68 |
| -9 | -3 | 11 | 54.08  | 2.30 |
| -9 | -3 | 11 | 54.00  | 2.11 |
| -9 | -3 | 11 | 52.80  | 2.31 |
| -9 | -3 | 12 | 27.72  | 1.32 |
| -9 | -3 | 12 | 30.19  | 1.48 |
| -9 | -3 | 12 | 28.70  | 1.34 |
| -9 | -2 | -3 | 35.60  | 1.35 |
| -9 | -2 | -3 | 28.14  | 1.04 |
| -9 | -2 | -2 | 211.91 | 3.64 |
| -9 | -2 | -1 | 18.83  | 1.18 |
| -9 | -2 | -1 | 19.35  | 1.39 |
| -9 | -2 | 0  | 10.69  | 1.04 |
| -9 | -2 | 0  | 10.89  | 1.20 |
| -9 | -2 | 0  | 9.59   | 0.95 |
| -9 | -2 | 1  | 1.11   | 0.67 |
| -9 | -2 | 1  | 1.21   | 0.83 |

## CIF 31

|    |    |    |        |      |
|----|----|----|--------|------|
| -9 | -2 | 1  | 0.70   | 0.54 |
| -9 | -2 | 1  | 0.23   | 0.63 |
| -9 | -2 | 1  | 1.41   | 0.76 |
| -9 | -2 | 2  | 25.92  | 1.63 |
| -9 | -2 | 2  | 23.38  | 1.62 |
| -9 | -2 | 2  | 25.91  | 1.74 |
| -9 | -2 | 2  | 23.39  | 1.61 |
| -9 | -2 | 3  | 49.94  | 2.93 |
| -9 | -2 | 3  | 54.50  | 3.24 |
| -9 | -2 | 3  | 47.91  | 2.20 |
| -9 | -2 | 3  | 51.34  | 2.40 |
| -9 | -2 | 4  | 14.77  | 2.01 |
| -9 | -2 | 4  | 22.82  | 1.76 |
| -9 | -2 | 4  | 20.54  | 1.41 |
| -9 | -2 | 4  | 14.11  | 1.86 |
| -9 | -2 | 5  | 4.56   | 1.18 |
| -9 | -2 | 5  | 7.25   | 1.55 |
| -9 | -2 | 5  | 6.66   | 1.54 |
| -9 | -2 | 6  | 78.57  | 3.86 |
| -9 | -2 | 6  | 73.98  | 3.07 |
| -9 | -2 | 6  | 81.84  | 4.06 |
| -9 | -2 | 6  | 88.60  | 3.18 |
| -9 | -2 | 6  | 71.08  | 3.03 |
| -9 | -2 | 7  | 61.51  | 2.61 |
| -9 | -2 | 7  | 57.74  | 2.75 |
| -9 | -2 | 7  | 57.02  | 2.75 |
| -9 | -2 | 7  | 56.84  | 2.77 |
| -9 | -2 | 7  | 56.55  | 3.47 |
| -9 | -2 | 7  | 58.50  | 3.38 |
| -9 | -2 | 8  | 148.98 | 3.86 |
| -9 | -2 | 8  | 143.63 | 3.97 |
| -9 | -2 | 8  | 143.19 | 4.35 |
| -9 | -2 | 8  | 134.32 | 4.17 |
| -9 | -2 | 8  | 152.70 | 5.14 |
| -9 | -2 | 9  | 67.95  | 2.94 |
| -9 | -2 | 9  | 73.11  | 3.45 |
| -9 | -2 | 9  | 76.24  | 2.84 |
| -9 | -2 | 9  | 68.66  | 2.87 |
| -9 | -2 | 9  | 72.25  | 2.47 |
| -9 | -2 | 10 | 164.49 | 4.43 |
| -9 | -2 | 10 | 169.50 | 4.19 |

## CIF 31

|    |    |    |        |      |
|----|----|----|--------|------|
| -9 | -2 | 11 | 15.89  | 1.41 |
| -9 | -2 | 11 | 16.55  | 1.30 |
| -9 | -2 | 11 | 15.25  | 1.62 |
| -9 | -2 | 12 | 244.50 | 5.00 |
| -9 | -2 | 12 | 220.69 | 4.11 |
| -9 | -2 | 12 | 239.80 | 4.97 |
| -9 | -2 | 12 | 228.78 | 4.48 |
| -9 | -2 | 13 | 100.24 | 2.34 |
| -9 | -1 | -4 | 0.43   | 0.44 |
| -9 | -1 | -4 | 0.46   | 0.49 |
| -9 | -1 | -3 | 162.26 | 3.37 |
| -9 | -1 | -2 | 33.18  | 1.47 |
| -9 | -1 | -2 | 33.69  | 1.69 |
| -9 | -1 | -2 | 33.74  | 1.87 |
| -9 | -1 | -1 | 168.02 | 4.25 |
| -9 | -1 | -1 | 168.01 | 3.87 |
| -9 | -1 | -1 | 164.99 | 3.75 |
| -9 | -1 | -1 | 159.31 | 3.78 |
| -9 | -1 | 0  | 45.13  | 1.97 |
| -9 | -1 | 0  | 39.32  | 1.90 |
| -9 | -1 | 0  | 43.94  | 2.25 |
| -9 | -1 | 0  | 45.64  | 2.20 |
| -9 | -1 | 0  | 45.63  | 2.12 |
| -9 | -1 | 1  | 215.73 | 4.45 |
| -9 | -1 | 1  | 232.32 | 4.80 |
| -9 | -1 | 1  | 255.52 | 5.40 |
| -9 | -1 | 1  | 240.78 | 5.09 |
| -9 | -1 | 1  | 260.22 | 5.54 |
| -9 | -1 | 1  | 243.05 | 5.35 |
| -9 | -1 | 2  | 191.20 | 4.71 |
| -9 | -1 | 2  | 197.04 | 4.48 |
| -9 | -1 | 2  | 189.28 | 6.00 |
| -9 | -1 | 2  | 179.39 | 4.55 |
| -9 | -1 | 3  | 48.77  | 2.27 |
| -9 | -1 | 3  | 53.06  | 2.59 |
| -9 | -1 | 3  | 47.58  | 2.26 |
| -9 | -1 | 3  | 48.11  | 3.19 |
| -9 | -1 | 3  | 48.45  | 3.02 |
| -9 | -1 | 4  | 1.32   | 1.01 |
| -9 | -1 | 4  | 1.35   | 1.25 |
| -9 | -1 | 4  | 1.35   | 0.66 |



## CIF 31

|    |    |    |        |      |
|----|----|----|--------|------|
| -9 | -1 | 4  | 2.97   | 1.51 |
| -9 | -1 | 4  | 1.98   | 0.83 |
| -9 | -1 | 5  | 412.46 | 9.24 |
| -9 | -1 | 5  | 413.27 | 9.53 |
| -9 | -1 | 6  | 167.98 | 4.65 |
| -9 | -1 | 6  | 171.86 | 5.78 |
| -9 | -1 | 6  | 179.40 | 6.16 |
| -9 | -1 | 6  | 160.26 | 4.61 |
| -9 | -1 | 6  | 169.39 | 4.64 |
| -9 | -1 | 7  | 218.61 | 6.51 |
| -9 | -1 | 7  | 200.90 | 6.01 |
| -9 | -1 | 7  | 200.96 | 5.28 |
| -9 | -1 | 7  | 211.86 | 5.42 |
| -9 | -1 | 7  | 221.98 | 5.18 |
| -9 | -1 | 7  | 193.26 | 5.26 |
| -9 | -1 | 8  | 384.50 | 7.24 |
| -9 | -1 | 8  | 377.08 | 8.50 |
| -9 | -1 | 8  | 401.58 | 6.96 |
| -9 | -1 | 8  | 373.39 | 7.53 |
| -9 | -1 | 8  | 388.19 | 7.48 |
| -9 | -1 | 8  | 388.61 | 7.68 |
| -9 | -1 | 8  | 398.16 | 8.80 |
| -9 | -1 | 9  | 1.32   | 0.92 |
| -9 | -1 | 9  | 0.64   | 1.20 |
| -9 | -1 | 9  | 1.00   | 0.71 |
| -9 | -1 | 9  | 1.07   | 0.70 |
| -9 | -1 | 9  | 0.07   | 0.77 |
| -9 | -1 | 9  | 0.51   | 0.82 |
| -9 | -1 | 10 | 40.91  | 2.36 |
| -9 | -1 | 10 | 50.07  | 2.45 |
| -9 | -1 | 10 | 42.94  | 2.26 |
| -9 | -1 | 10 | 45.34  | 2.78 |
| -9 | -1 | 10 | 44.89  | 2.26 |
| -9 | -1 | 11 | 403.72 | 7.25 |
| -9 | -1 | 11 | 421.01 | 6.90 |
| -9 | -1 | 12 | 24.13  | 1.58 |
| -9 | -1 | 12 | 28.22  | 1.50 |
| -9 | -1 | 12 | 24.81  | 1.83 |
| -9 | -1 | 13 | 241.78 | 4.28 |
| -9 | -1 | 13 | 223.38 | 3.73 |
| -9 | 0  | -5 | 227.78 | 3.68 |

## CIF 31

|    |   |    |        |      |
|----|---|----|--------|------|
| -9 | 0 | -5 | 243.95 | 3.85 |
| -9 | 0 | -4 | 141.06 | 3.25 |
| -9 | 0 | -4 | 143.38 | 3.38 |
| -9 | 0 | -3 | 41.82  | 1.87 |
| -9 | 0 | -3 | 42.98  | 1.85 |
| -9 | 0 | -3 | 42.44  | 1.97 |
| -9 | 0 | -2 | 16.53  | 1.42 |
| -9 | 0 | -2 | 18.45  | 1.57 |
| -9 | 0 | -2 | 16.88  | 1.40 |
| -9 | 0 | -2 | 17.78  | 1.41 |
| -9 | 0 | -2 | 17.58  | 1.43 |
| -9 | 0 | -1 | 170.00 | 4.21 |
| -9 | 0 | -1 | 170.55 | 4.38 |
| -9 | 0 | -1 | 165.56 | 4.20 |
| -9 | 0 | -1 | 167.38 | 4.46 |
| -9 | 0 | -1 | 176.03 | 4.45 |
| -9 | 0 | 0  | 51.10  | 2.53 |
| -9 | 0 | 0  | 49.08  | 2.51 |
| -9 | 0 | 0  | 46.84  | 2.43 |
| -9 | 0 | 0  | 41.14  | 2.06 |
| -9 | 0 | 0  | 47.47  | 2.36 |
| -9 | 0 | 1  | 171.51 | 4.57 |
| -9 | 0 | 1  | 185.70 | 4.94 |
| -9 | 0 | 1  | 184.89 | 5.59 |
| -9 | 0 | 1  | 168.33 | 5.51 |
| -9 | 0 | 1  | 165.47 | 4.46 |
| -9 | 0 | 1  | 167.86 | 4.38 |
| -9 | 0 | 2  | 117.44 | 4.66 |
| -9 | 0 | 2  | 118.77 | 3.76 |
| -9 | 0 | 2  | 117.77 | 3.99 |
| -9 | 0 | 2  | 112.79 | 3.62 |
| -9 | 0 | 2  | 91.91  | 4.38 |
| -9 | 0 | 2  | 121.04 | 3.86 |
| -9 | 0 | 2  | 94.42  | 4.04 |
| -9 | 0 | 3  | 211.25 | 6.51 |
| -9 | 0 | 3  | 201.05 | 5.20 |
| -9 | 0 | 3  | 203.25 | 5.02 |
| -9 | 0 | 3  | 192.14 | 4.62 |
| -9 | 0 | 3  | 194.56 | 5.95 |
| -9 | 0 | 3  | 209.14 | 6.34 |
| -9 | 0 | 4  | 47.11  | 3.18 |

## CIF 31

|    |   |    |        |      |
|----|---|----|--------|------|
| -9 | 0 | 4  | 39.78  | 2.87 |
| -9 | 0 | 4  | 47.82  | 2.60 |
| -9 | 0 | 4  | 39.28  | 3.05 |
| -9 | 0 | 5  | 242.09 | 7.29 |
| -9 | 0 | 5  | 249.46 | 6.96 |
| -9 | 0 | 6  | 23.48  | 2.38 |
| -9 | 0 | 6  | 24.50  | 2.23 |
| -9 | 0 | 6  | 21.76  | 2.30 |
| -9 | 0 | 6  | 28.61  | 2.51 |
| -9 | 0 | 6  | 26.53  | 1.99 |
| -9 | 0 | 6  | 25.08  | 1.98 |
| -9 | 0 | 6  | 23.51  | 2.48 |
| -9 | 0 | 7  | 12.25  | 1.44 |
| -9 | 0 | 7  | 12.16  | 1.44 |
| -9 | 0 | 7  | 11.65  | 1.83 |
| -9 | 0 | 7  | 13.71  | 1.82 |
| -9 | 0 | 7  | 11.91  | 1.69 |
| -9 | 0 | 7  | 11.49  | 1.48 |
| -9 | 0 | 7  | 11.55  | 1.92 |
| -9 | 0 | 7  | 13.02  | 1.93 |
| -9 | 0 | 7  | 10.23  | 1.45 |
| -9 | 0 | 8  | 3.75   | 1.36 |
| -9 | 0 | 8  | 2.65   | 0.89 |
| -9 | 0 | 8  | 1.30   | 1.19 |
| -9 | 0 | 8  | 2.99   | 1.06 |
| -9 | 0 | 8  | 2.37   | 0.96 |
| -9 | 0 | 8  | 2.10   | 1.27 |
| -9 | 0 | 8  | 2.78   | 1.02 |
| -9 | 0 | 8  | 2.65   | 1.12 |
| -9 | 0 | 8  | 2.11   | 1.15 |
| -9 | 0 | 9  | 62.31  | 3.39 |
| -9 | 0 | 9  | 62.43  | 3.35 |
| -9 | 0 | 9  | 62.60  | 2.86 |
| -9 | 0 | 9  | 62.70  | 2.95 |
| -9 | 0 | 9  | 66.96  | 3.60 |
| -9 | 0 | 9  | 67.22  | 2.81 |
| -9 | 0 | 9  | 71.89  | 3.19 |
| -9 | 0 | 9  | 53.47  | 3.02 |
| -9 | 0 | 9  | 71.64  | 3.17 |
| -9 | 0 | 10 | 47.16  | 2.53 |
| -9 | 0 | 10 | 51.44  | 2.94 |

## CIF 31

|    |   |    |        |      |
|----|---|----|--------|------|
| -9 | 0 | 10 | 51.47  | 2.95 |
| -9 | 0 | 10 | 58.86  | 2.80 |
| -9 | 0 | 10 | 53.84  | 3.13 |
| -9 | 0 | 10 | 53.53  | 2.69 |
| -9 | 0 | 10 | 52.17  | 2.52 |
| -9 | 0 | 10 | 57.79  | 2.80 |
| -9 | 0 | 10 | 54.47  | 2.47 |
| -9 | 0 | 11 | 38.69  | 2.22 |
| -9 | 0 | 11 | 36.61  | 2.50 |
| -9 | 0 | 11 | 36.39  | 1.95 |
| -9 | 0 | 11 | 33.87  | 2.12 |
| -9 | 0 | 12 | 19.06  | 1.48 |
| -9 | 0 | 12 | 18.34  | 1.29 |
| -9 | 0 | 13 | 42.93  | 1.76 |
| -9 | 0 | 13 | 47.13  | 2.11 |
| -9 | 1 | -6 | 344.22 | 4.63 |
| -9 | 1 | -5 | 145.74 | 3.10 |
| -9 | 1 | -5 | 143.58 | 2.94 |
| -9 | 1 | -5 | 147.88 | 3.31 |
| -9 | 1 | -5 | 152.75 | 3.39 |
| -9 | 1 | -4 | 13.23  | 1.25 |
| -9 | 1 | -4 | 12.36  | 1.21 |
| -9 | 1 | -4 | 13.60  | 1.27 |
| -9 | 1 | -3 | 182.60 | 4.40 |
| -9 | 1 | -3 | 197.82 | 4.62 |
| -9 | 1 | -3 | 193.26 | 4.49 |
| -9 | 1 | -3 | 180.09 | 4.54 |
| -9 | 1 | -2 | 254.97 | 5.59 |
| -9 | 1 | -2 | 243.30 | 5.48 |
| -9 | 1 | -2 | 239.10 | 5.26 |
| -9 | 1 | -2 | 249.10 | 5.63 |
| -9 | 1 | -2 | 252.89 | 5.46 |
| -9 | 1 | -1 | 103.60 | 3.62 |
| -9 | 1 | -1 | 106.71 | 3.65 |
| -9 | 1 | -1 | 101.20 | 3.81 |
| -9 | 1 | -1 | 109.35 | 3.73 |
| -9 | 1 | -1 | 101.93 | 3.35 |
| -9 | 1 | -1 | 109.00 | 3.78 |
| -9 | 1 | 0  | 2.71   | 1.19 |
| -9 | 1 | 0  | 1.34   | 1.05 |
| -9 | 1 | 0  | 1.85   | 0.92 |

## CIF 31

|    |   |   |         |       |
|----|---|---|---------|-------|
| -9 | 1 | 0 | 2.24    | 1.09  |
| -9 | 1 | 0 | 1.96    | 0.80  |
| -9 | 1 | 0 | 1.70    | 1.05  |
| -9 | 1 | 1 | 103.97  | 4.34  |
| -9 | 1 | 1 | 106.66  | 3.60  |
| -9 | 1 | 1 | 101.67  | 3.69  |
| -9 | 1 | 1 | 102.92  | 3.78  |
| -9 | 1 | 2 | 215.44  | 5.42  |
| -9 | 1 | 2 | 230.70  | 6.66  |
| -9 | 1 | 2 | 181.12  | 5.43  |
| -9 | 1 | 2 | 182.75  | 5.92  |
| -9 | 1 | 2 | 216.33  | 5.04  |
| -9 | 1 | 3 | 1021.07 | 14.99 |
| -9 | 1 | 3 | 969.68  | 16.39 |
| -9 | 1 | 3 | 920.75  | 16.09 |
| -9 | 1 | 3 | 980.30  | 13.61 |
| -9 | 1 | 3 | 1107.06 | 16.11 |
| -9 | 1 | 3 | 1046.64 | 16.12 |
| -9 | 1 | 3 | 982.88  | 12.39 |
| -9 | 1 | 4 | 14.09   | 1.88  |
| -9 | 1 | 4 | 13.27   | 2.11  |
| -9 | 1 | 4 | 15.98   | 2.14  |
| -9 | 1 | 5 | 52.63   | 3.58  |
| -9 | 1 | 5 | 60.67   | 3.71  |
| -9 | 1 | 5 | 44.96   | 2.83  |
| -9 | 1 | 5 | 43.74   | 3.32  |
| -9 | 1 | 5 | 54.57   | 3.25  |
| -9 | 1 | 5 | 59.37   | 2.84  |
| -9 | 1 | 6 | 95.62   | 4.65  |
| -9 | 1 | 6 | 106.63  | 4.61  |
| -9 | 1 | 6 | 98.27   | 4.22  |
| -9 | 1 | 6 | 103.64  | 3.98  |
| -9 | 1 | 6 | 106.42  | 4.56  |
| -9 | 1 | 7 | 277.69  | 8.09  |
| -9 | 1 | 7 | 334.32  | 7.39  |
| -9 | 1 | 7 | 288.35  | 7.84  |
| -9 | 1 | 7 | 287.23  | 7.43  |
| -9 | 1 | 7 | 316.44  | 7.22  |
| -9 | 1 | 7 | 325.68  | 7.83  |
| -9 | 1 | 7 | 312.94  | 7.99  |
| -9 | 1 | 8 | 730.58  | 13.03 |

## CIF 31

|    |   |    |        |       |
|----|---|----|--------|-------|
| -9 | 1 | 8  | 728.93 | 12.64 |
| -9 | 1 | 8  | 746.07 | 12.31 |
| -9 | 1 | 8  | 792.94 | 12.37 |
| -9 | 1 | 8  | 779.36 | 13.76 |
| -9 | 1 | 8  | 833.03 | 12.31 |
| -9 | 1 | 8  | 774.51 | 11.43 |
| -9 | 1 | 9  | 59.66  | 2.86  |
| -9 | 1 | 9  | 59.21  | 3.33  |
| -9 | 1 | 9  | 56.96  | 3.42  |
| -9 | 1 | 9  | 57.96  | 3.25  |
| -9 | 1 | 9  | 62.89  | 2.99  |
| -9 | 1 | 9  | 62.63  | 3.06  |
| -9 | 1 | 9  | 57.77  | 2.85  |
| -9 | 1 | 10 | 220.08 | 5.04  |
| -9 | 1 | 10 | 241.35 | 5.78  |
| -9 | 1 | 10 | 226.20 | 5.94  |
| -9 | 1 | 10 | 241.60 | 6.31  |
| -9 | 1 | 10 | 216.80 | 6.03  |
| -9 | 1 | 10 | 211.91 | 6.14  |
| -9 | 1 | 10 | 235.69 | 5.10  |
| -9 | 1 | 10 | 229.04 | 5.55  |
| -9 | 1 | 10 | 241.12 | 5.71  |
| -9 | 1 | 11 | 161.48 | 4.93  |
| -9 | 1 | 11 | 167.32 | 4.48  |
| -9 | 1 | 11 | 173.90 | 4.11  |
| -9 | 1 | 11 | 178.73 | 4.71  |
| -9 | 1 | 11 | 164.68 | 4.87  |
| -9 | 1 | 11 | 157.27 | 4.36  |
| -9 | 1 | 11 | 189.09 | 5.20  |
| -9 | 1 | 11 | 177.99 | 4.61  |
| -9 | 1 | 12 | 5.22   | 0.97  |
| -9 | 1 | 12 | 4.68   | 0.91  |
| -9 | 1 | 13 | 61.79  | 2.12  |
| -9 | 2 | -6 | -0.33  | 0.74  |
| -9 | 2 | -6 | 0.17   | 0.54  |
| -9 | 2 | -6 | 0.48   | 0.54  |
| -9 | 2 | -5 | 99.23  | 2.97  |
| -9 | 2 | -5 | 93.81  | 2.59  |
| -9 | 2 | -5 | 96.53  | 2.94  |
| -9 | 2 | -4 | 44.81  | 2.26  |
| -9 | 2 | -4 | 41.59  | 2.09  |

## CIF 31

|    |   |    |        |      |
|----|---|----|--------|------|
| -9 | 2 | -3 | 77.75  | 3.14 |
| -9 | 2 | -3 | 79.09  | 3.15 |
| -9 | 2 | -3 | 77.80  | 3.09 |
| -9 | 2 | -3 | 76.70  | 2.97 |
| -9 | 2 | -3 | 71.73  | 2.87 |
| -9 | 2 | -2 | 2.76   | 1.13 |
| -9 | 2 | -2 | 4.32   | 1.09 |
| -9 | 2 | -2 | 3.75   | 1.19 |
| -9 | 2 | -2 | 4.14   | 1.19 |
| -9 | 2 | -2 | 2.96   | 0.97 |
| -9 | 2 | -2 | 3.08   | 0.96 |
| -9 | 2 | -1 | 154.45 | 4.76 |
| -9 | 2 | -1 | 154.39 | 4.65 |
| -9 | 2 | -1 | 157.12 | 4.59 |
| -9 | 2 | -1 | 148.16 | 4.87 |
| -9 | 2 | -1 | 148.39 | 4.12 |
| -9 | 2 | -1 | 151.66 | 4.50 |
| -9 | 2 | 0  | 98.08  | 3.72 |
| -9 | 2 | 0  | 98.18  | 3.69 |
| -9 | 2 | 0  | 91.42  | 4.06 |
| -9 | 2 | 0  | 99.56  | 3.81 |
| -9 | 2 | 0  | 91.11  | 3.09 |
| -9 | 2 | 0  | 90.58  | 3.43 |
| -9 | 2 | 1  | 30.50  | 2.32 |
| -9 | 2 | 1  | 32.13  | 2.02 |
| -9 | 2 | 2  | 254.65 | 7.49 |
| -9 | 2 | 2  | 259.54 | 7.74 |
| -9 | 2 | 2  | 269.31 | 5.61 |
| -9 | 2 | 2  | 288.82 | 7.68 |
| -9 | 2 | 2  | 265.87 | 6.86 |
| -9 | 2 | 2  | 280.94 | 6.36 |
| -9 | 2 | 2  | 273.05 | 6.28 |
| -9 | 2 | 3  | 22.61  | 2.22 |
| -9 | 2 | 3  | 23.63  | 2.45 |
| -9 | 2 | 3  | 21.81  | 2.43 |
| -9 | 2 | 3  | 19.88  | 1.88 |
| -9 | 2 | 3  | 15.77  | 1.69 |
| -9 | 2 | 3  | 20.35  | 2.39 |
| -9 | 2 | 4  | 196.19 | 7.37 |
| -9 | 2 | 4  | 182.15 | 5.51 |
| -9 | 2 | 4  | 205.80 | 6.83 |

## CIF 31

|    |   |   |        |      |
|----|---|---|--------|------|
| -9 | 2 | 4 | 203.19 | 6.79 |
| -9 | 2 | 4 | 206.05 | 5.92 |
| -9 | 2 | 5 | 0.55   | 1.03 |
| -9 | 2 | 5 | 1.38   | 0.75 |
| -9 | 2 | 5 | 1.54   | 1.36 |
| -9 | 2 | 5 | 0.88   | 1.75 |
| -9 | 2 | 5 | 0.81   | 1.30 |
| -9 | 2 | 5 | 1.05   | 0.95 |
| -9 | 2 | 6 | 0.35   | 0.68 |
| -9 | 2 | 6 | -0.08  | 1.79 |
| -9 | 2 | 6 | 1.27   | 0.96 |
| -9 | 2 | 6 | 0.06   | 1.23 |
| -9 | 2 | 6 | 1.03   | 0.93 |
| -9 | 2 | 6 | 0.93   | 1.41 |
| -9 | 2 | 6 | 1.12   | 1.34 |
| -9 | 2 | 6 | 1.10   | 1.56 |
| -9 | 2 | 7 | 5.39   | 1.33 |
| -9 | 2 | 7 | 3.54   | 1.50 |
| -9 | 2 | 7 | 4.39   | 1.63 |
| -9 | 2 | 7 | 3.47   | 1.98 |
| -9 | 2 | 7 | 5.70   | 1.28 |
| -9 | 2 | 7 | 5.11   | 1.40 |
| -9 | 2 | 7 | 5.01   | 1.08 |
| -9 | 2 | 8 | 52.20  | 2.68 |
| -9 | 2 | 8 | 55.36  | 2.94 |
| -9 | 2 | 8 | 55.04  | 3.02 |
| -9 | 2 | 8 | 44.53  | 3.15 |
| -9 | 2 | 8 | 55.28  | 2.72 |
| -9 | 2 | 8 | 54.98  | 3.47 |
| -9 | 2 | 8 | 50.84  | 4.00 |
| -9 | 2 | 8 | 52.75  | 3.09 |
| -9 | 2 | 8 | 51.20  | 3.12 |
| -9 | 2 | 8 | 50.30  | 3.44 |
| -9 | 2 | 9 | 94.20  | 4.21 |
| -9 | 2 | 9 | 95.30  | 4.32 |
| -9 | 2 | 9 | 119.11 | 4.12 |
| -9 | 2 | 9 | 114.00 | 3.91 |
| -9 | 2 | 9 | 98.62  | 4.16 |
| -9 | 2 | 9 | 110.29 | 4.36 |
| -9 | 2 | 9 | 99.85  | 3.57 |
| -9 | 2 | 9 | 103.37 | 4.57 |



## CIF 31

|    |   |    |        |       |
|----|---|----|--------|-------|
| -9 | 2 | 9  | 107.58 | 4.01  |
| -9 | 2 | 9  | 110.29 | 3.83  |
| -9 | 2 | 9  | 109.20 | 3.82  |
| -9 | 2 | 10 | 149.46 | 4.95  |
| -9 | 2 | 10 | 148.86 | 5.19  |
| -9 | 2 | 10 | 163.72 | 4.50  |
| -9 | 2 | 10 | 167.51 | 5.16  |
| -9 | 2 | 10 | 150.78 | 4.96  |
| -9 | 2 | 10 | 161.64 | 4.57  |
| -9 | 2 | 10 | 156.42 | 4.58  |
| -9 | 2 | 10 | 166.55 | 4.78  |
| -9 | 2 | 10 | 158.72 | 4.44  |
| -9 | 2 | 11 | 79.77  | 3.26  |
| -9 | 2 | 11 | 87.35  | 3.58  |
| -9 | 2 | 11 | 85.03  | 3.61  |
| -9 | 2 | 11 | 86.57  | 3.12  |
| -9 | 2 | 11 | 87.78  | 3.55  |
| -9 | 2 | 11 | 92.50  | 3.28  |
| -9 | 2 | 12 | 544.51 | 7.93  |
| -9 | 2 | 12 | 528.48 | 8.00  |
| -9 | 2 | 13 | 51.57  | 1.81  |
| -9 | 3 | -7 | 2.23   | 1.00  |
| -9 | 3 | -7 | 2.25   | 1.36  |
| -9 | 3 | -6 | 3.69   | 0.85  |
| -9 | 3 | -6 | 4.57   | 0.94  |
| -9 | 3 | -6 | 4.77   | 0.74  |
| -9 | 3 | -6 | 4.39   | 0.90  |
| -9 | 3 | -5 | 32.17  | 1.99  |
| -9 | 3 | -5 | 31.87  | 1.98  |
| -9 | 3 | -4 | 714.00 | 10.41 |
| -9 | 3 | -4 | 751.30 | 10.73 |
| -9 | 3 | -3 | 56.69  | 2.83  |
| -9 | 3 | -3 | 59.92  | 2.83  |
| -9 | 3 | -3 | 56.85  | 2.82  |
| -9 | 3 | -3 | 53.43  | 2.53  |
| -9 | 3 | -3 | 57.64  | 2.73  |
| -9 | 3 | -2 | 110.12 | 3.78  |
| -9 | 3 | -2 | 106.22 | 3.97  |
| -9 | 3 | -2 | 111.25 | 3.65  |
| -9 | 3 | -2 | 109.60 | 3.98  |
| -9 | 3 | -2 | 114.27 | 3.99  |

## CIF 31

|    |   |    |        |       |
|----|---|----|--------|-------|
| -9 | 3 | -2 | 114.14 | 3.95  |
| -9 | 3 | -1 | 331.24 | 6.45  |
| -9 | 3 | -1 | 340.04 | 7.13  |
| -9 | 3 | -1 | 347.44 | 7.30  |
| -9 | 3 | -1 | 358.48 | 8.05  |
| -9 | 3 | -1 | 357.39 | 7.06  |
| -9 | 3 | 0  | 579.83 | 9.30  |
| -9 | 3 | 0  | 565.58 | 9.73  |
| -9 | 3 | 0  | 590.57 | 11.08 |
| -9 | 3 | 1  | 15.53  | 2.05  |
| -9 | 3 | 1  | 13.06  | 1.88  |
| -9 | 3 | 1  | 16.14  | 1.77  |
| -9 | 3 | 1  | 14.98  | 1.65  |
| -9 | 3 | 1  | 16.45  | 1.53  |
| -9 | 3 | 1  | 12.84  | 1.99  |
| -9 | 3 | 2  | 100.11 | 4.82  |
| -9 | 3 | 2  | 102.15 | 3.24  |
| -9 | 3 | 2  | 102.40 | 4.65  |
| -9 | 3 | 2  | 102.87 | 5.24  |
| -9 | 3 | 2  | 113.39 | 4.87  |
| -9 | 3 | 2  | 109.77 | 3.91  |
| -9 | 3 | 3  | 30.03  | 2.08  |
| -9 | 3 | 3  | 37.96  | 3.01  |
| -9 | 3 | 3  | 31.85  | 2.79  |
| -9 | 3 | 3  | 30.66  | 2.89  |
| -9 | 3 | 3  | 31.06  | 2.94  |
| -9 | 3 | 3  | 31.93  | 3.17  |
| -9 | 3 | 4  | 5.12   | 1.83  |
| -9 | 3 | 4  | 5.88   | 1.93  |
| -9 | 3 | 4  | 6.58   | 1.21  |
| -9 | 3 | 4  | 10.02  | 1.94  |
| -9 | 3 | 4  | 10.85  | 2.05  |
| -9 | 3 | 4  | 8.81   | 1.39  |
| -9 | 3 | 4  | 7.09   | 1.15  |
| -9 | 3 | 4  | 9.81   | 1.35  |
| -9 | 3 | 5  | 255.85 | 5.62  |
| -9 | 3 | 5  | 220.93 | 6.04  |
| -9 | 3 | 5  | 235.16 | 8.07  |
| -9 | 3 | 5  | 236.43 | 7.36  |
| -9 | 3 | 5  | 242.86 | 7.14  |
| -9 | 3 | 5  | 229.23 | 7.16  |

## CIF 31

|    |   |    |        |      |
|----|---|----|--------|------|
| -9 | 3 | 5  | 237.44 | 5.78 |
| -9 | 3 | 6  | 146.29 | 4.56 |
| -9 | 3 | 6  | 149.24 | 4.06 |
| -9 | 3 | 6  | 130.97 | 5.47 |
| -9 | 3 | 6  | 134.31 | 5.27 |
| -9 | 3 | 6  | 121.81 | 5.21 |
| -9 | 3 | 6  | 138.14 | 4.81 |
| -9 | 3 | 6  | 145.00 | 4.86 |
| -9 | 3 | 7  | 40.36  | 3.12 |
| -9 | 3 | 7  | 38.80  | 2.69 |
| -9 | 3 | 7  | 41.96  | 2.48 |
| -9 | 3 | 7  | 39.59  | 1.96 |
| -9 | 3 | 7  | 39.33  | 3.61 |
| -9 | 3 | 7  | 38.49  | 3.11 |
| -9 | 3 | 7  | 37.54  | 2.45 |
| -9 | 3 | 7  | 41.15  | 3.08 |
| -9 | 3 | 7  | 36.22  | 2.57 |
| -9 | 3 | 7  | 38.21  | 2.75 |
| -9 | 3 | 8  | 19.00  | 1.89 |
| -9 | 3 | 8  | 19.95  | 2.27 |
| -9 | 3 | 8  | 16.44  | 2.19 |
| -9 | 3 | 8  | 19.14  | 2.30 |
| -9 | 3 | 8  | 24.30  | 1.99 |
| -9 | 3 | 8  | 18.96  | 1.79 |
| -9 | 3 | 8  | 17.72  | 1.92 |
| -9 | 3 | 8  | 19.28  | 1.82 |
| -9 | 3 | 8  | 15.71  | 2.52 |
| -9 | 3 | 8  | 18.13  | 1.96 |
| -9 | 3 | 9  | 278.94 | 7.05 |
| -9 | 3 | 9  | 309.19 | 6.70 |
| -9 | 3 | 9  | 291.95 | 7.75 |
| -9 | 3 | 9  | 285.48 | 6.47 |
| -9 | 3 | 9  | 302.77 | 8.54 |
| -9 | 3 | 9  | 292.26 | 7.10 |
| -9 | 3 | 9  | 252.82 | 7.18 |
| -9 | 3 | 9  | 279.49 | 7.23 |
| -9 | 3 | 9  | 307.10 | 6.36 |
| -9 | 3 | 9  | 288.44 | 7.55 |
| -9 | 3 | 9  | 304.72 | 6.86 |
| -9 | 3 | 10 | 38.72  | 2.55 |
| -9 | 3 | 10 | 33.17  | 2.04 |

## CIF 31

|    |   |    |        |      |
|----|---|----|--------|------|
| -9 | 3 | 10 | 36.90  | 2.67 |
| -9 | 3 | 10 | 37.41  | 2.24 |
| -9 | 3 | 10 | 39.41  | 2.71 |
| -9 | 3 | 10 | 34.95  | 2.17 |
| -9 | 3 | 10 | 34.24  | 2.41 |
| -9 | 3 | 10 | 29.84  | 2.70 |
| -9 | 3 | 10 | 36.21  | 2.43 |
| -9 | 3 | 10 | 35.53  | 2.04 |
| -9 | 3 | 10 | 30.00  | 2.41 |
| -9 | 3 | 10 | 38.37  | 2.17 |
| -9 | 3 | 11 | 213.58 | 5.42 |
| -9 | 3 | 11 | 204.48 | 5.61 |
| -9 | 3 | 11 | 196.90 | 4.49 |
| -9 | 3 | 11 | 198.99 | 4.64 |
| -9 | 3 | 11 | 193.14 | 5.23 |
| -9 | 3 | 11 | 194.39 | 5.28 |
| -9 | 3 | 12 | 96.88  | 2.73 |
| -9 | 3 | 12 | 91.59  | 3.20 |
| -9 | 3 | 13 | 184.11 | 3.91 |
| -9 | 4 | -7 | -0.06  | 0.52 |
| -9 | 4 | -7 | 1.59   | 0.98 |
| -9 | 4 | -7 | -0.10  | 0.83 |
| -9 | 4 | -6 | 124.07 | 3.35 |
| -9 | 4 | -6 | 123.89 | 3.40 |
| -9 | 4 | -6 | 122.79 | 3.13 |
| -9 | 4 | -5 | 1.17   | 1.06 |
| -9 | 4 | -4 | 8.17   | 1.35 |
| -9 | 4 | -4 | 6.43   | 0.94 |
| -9 | 4 | -3 | 171.63 | 4.03 |
| -9 | 4 | -3 | 180.53 | 4.88 |
| -9 | 4 | -2 | 181.91 | 4.25 |
| -9 | 4 | -2 | 184.51 | 5.42 |
| -9 | 4 | -1 | 0.37   | 0.69 |
| -9 | 4 | -1 | 0.59   | 1.13 |
| -9 | 4 | -1 | 0.46   | 1.06 |
| -9 | 4 | -1 | 0.46   | 1.04 |
| -9 | 4 | -1 | 0.86   | 0.90 |
| -9 | 4 | 0  | 34.62  | 2.77 |
| -9 | 4 | 0  | 34.51  | 2.75 |
| -9 | 4 | 0  | 29.95  | 2.17 |
| -9 | 4 | 0  | 32.08  | 2.05 |

## CIF 31

|    |   |   |        |       |
|----|---|---|--------|-------|
| -9 | 4 | 0 | 30.51  | 2.23  |
| -9 | 4 | 1 | 23.42  | 1.91  |
| -9 | 4 | 1 | 21.76  | 2.33  |
| -9 | 4 | 1 | 20.33  | 2.14  |
| -9 | 4 | 1 | 22.14  | 1.63  |
| -9 | 4 | 1 | 23.38  | 2.47  |
| -9 | 4 | 1 | 20.04  | 2.41  |
| -9 | 4 | 2 | -0.45  | 1.10  |
| -9 | 4 | 2 | 1.15   | 1.35  |
| -9 | 4 | 2 | 0.98   | 1.23  |
| -9 | 4 | 2 | 1.13   | 1.37  |
| -9 | 4 | 2 | 1.30   | 0.96  |
| -9 | 4 | 2 | 0.63   | 1.15  |
| -9 | 4 | 3 | 206.98 | 5.19  |
| -9 | 4 | 3 | 206.35 | 6.54  |
| -9 | 4 | 3 | 213.86 | 7.36  |
| -9 | 4 | 3 | 196.53 | 4.50  |
| -9 | 4 | 3 | 209.86 | 6.83  |
| -9 | 4 | 3 | 212.38 | 6.79  |
| -9 | 4 | 3 | 191.00 | 6.68  |
| -9 | 4 | 4 | 260.76 | 7.57  |
| -9 | 4 | 4 | 279.70 | 5.88  |
| -9 | 4 | 4 | 271.65 | 7.83  |
| -9 | 4 | 4 | 263.66 | 8.52  |
| -9 | 4 | 4 | 283.72 | 6.51  |
| -9 | 4 | 4 | 271.08 | 8.05  |
| -9 | 4 | 4 | 268.13 | 7.84  |
| -9 | 4 | 4 | 269.04 | 7.72  |
| -9 | 4 | 5 | 427.03 | 7.22  |
| -9 | 4 | 5 | 413.39 | 10.81 |
| -9 | 4 | 5 | 423.22 | 9.88  |
| -9 | 4 | 5 | 405.70 | 8.12  |
| -9 | 4 | 5 | 428.90 | 9.93  |
| -9 | 4 | 5 | 428.30 | 8.35  |
| -9 | 4 | 5 | 419.74 | 9.72  |
| -9 | 4 | 5 | 423.37 | 10.13 |
| -9 | 4 | 5 | 419.53 | 9.73  |
| -9 | 4 | 6 | 13.67  | 1.60  |
| -9 | 4 | 6 | 14.47  | 2.04  |
| -9 | 4 | 6 | 13.78  | 1.65  |
| -9 | 4 | 6 | 14.50  | 2.21  |

## CIF 31

|    |   |    |        |       |
|----|---|----|--------|-------|
| -9 | 4 | 6  | 15.23  | 1.61  |
| -9 | 4 | 6  | 14.65  | 1.98  |
| -9 | 4 | 6  | 13.28  | 2.09  |
| -9 | 4 | 7  | 362.07 | 7.53  |
| -9 | 4 | 7  | 315.88 | 7.39  |
| -9 | 4 | 7  | 305.93 | 9.30  |
| -9 | 4 | 7  | 334.02 | 7.50  |
| -9 | 4 | 7  | 341.25 | 8.55  |
| -9 | 4 | 7  | 304.57 | 8.43  |
| -9 | 4 | 7  | 314.36 | 8.58  |
| -9 | 4 | 7  | 324.14 | 7.80  |
| -9 | 4 | 7  | 316.77 | 8.32  |
| -9 | 4 | 8  | 75.29  | 3.50  |
| -9 | 4 | 8  | 77.63  | 4.62  |
| -9 | 4 | 8  | 72.62  | 4.03  |
| -9 | 4 | 8  | 80.93  | 3.43  |
| -9 | 4 | 8  | 78.29  | 3.90  |
| -9 | 4 | 8  | 70.04  | 3.83  |
| -9 | 4 | 8  | 78.74  | 3.49  |
| -9 | 4 | 8  | 77.43  | 4.12  |
| -9 | 4 | 8  | 76.75  | 3.53  |
| -9 | 4 | 8  | 81.24  | 3.64  |
| -9 | 4 | 9  | 578.81 | 10.03 |
| -9 | 4 | 9  | 505.39 | 10.43 |
| -9 | 4 | 9  | 514.90 | 9.72  |
| -9 | 4 | 9  | 587.31 | 9.70  |
| -9 | 4 | 9  | 520.62 | 11.53 |
| -9 | 4 | 9  | 523.71 | 10.69 |
| -9 | 4 | 9  | 525.29 | 10.29 |
| -9 | 4 | 9  | 562.12 | 9.95  |
| -9 | 4 | 9  | 542.64 | 10.69 |
| -9 | 4 | 9  | 549.22 | 10.43 |
| -9 | 4 | 10 | 30.97  | 2.43  |
| -9 | 4 | 10 | 30.68  | 2.50  |
| -9 | 4 | 10 | 28.32  | 2.56  |
| -9 | 4 | 10 | 33.38  | 2.28  |
| -9 | 4 | 10 | 32.85  | 2.26  |
| -9 | 4 | 10 | 33.25  | 2.10  |
| -9 | 4 | 10 | 29.70  | 2.30  |
| -9 | 4 | 10 | 30.34  | 2.16  |
| -9 | 4 | 10 | 29.29  | 2.22  |

## CIF 31

|    |   |    |        |      |
|----|---|----|--------|------|
| -9 | 4 | 11 | 0.92   | 0.83 |
| -9 | 4 | 11 | 1.01   | 0.80 |
| -9 | 4 | 11 | 1.81   | 1.04 |
| -9 | 4 | 11 | 1.59   | 0.98 |
| -9 | 4 | 11 | 1.04   | 0.88 |
| -9 | 4 | 12 | 35.29  | 1.82 |
| -9 | 4 | 12 | 32.17  | 1.90 |
| -9 | 4 | 13 | 82.18  | 2.24 |
| -9 | 5 | -7 | 6.77   | 0.84 |
| -9 | 5 | -7 | 6.41   | 1.00 |
| -9 | 5 | -7 | 6.63   | 1.03 |
| -9 | 5 | -6 | 164.34 | 3.88 |
| -9 | 5 | -6 | 174.60 | 4.11 |
| -9 | 5 | -5 | 25.75  | 1.95 |
| -9 | 5 | -5 | 28.44  | 1.61 |
| -9 | 5 | -5 | 28.13  | 1.97 |
| -9 | 5 | -5 | 27.12  | 1.86 |
| -9 | 5 | -5 | 26.34  | 1.56 |
| -9 | 5 | -4 | 269.70 | 5.32 |
| -9 | 5 | -4 | 281.55 | 6.00 |
| -9 | 5 | -4 | 277.47 | 5.40 |
| -9 | 5 | -4 | 285.73 | 6.15 |
| -9 | 5 | -3 | 217.80 | 5.51 |
| -9 | 5 | -3 | 205.68 | 5.19 |
| -9 | 5 | -3 | 208.70 | 4.76 |
| -9 | 5 | -3 | 197.82 | 5.18 |
| -9 | 5 | -3 | 213.13 | 5.41 |
| -9 | 5 | -2 | 172.43 | 5.40 |
| -9 | 5 | -2 | 180.54 | 4.47 |
| -9 | 5 | -2 | 181.59 | 5.05 |
| -9 | 5 | -2 | 183.42 | 4.97 |
| -9 | 5 | -2 | 182.75 | 5.06 |
| -9 | 5 | -1 | 181.52 | 5.07 |
| -9 | 5 | -1 | 179.05 | 5.86 |
| -9 | 5 | -1 | 186.73 | 5.07 |
| -9 | 5 | -1 | 184.21 | 5.15 |
| -9 | 5 | -1 | 183.39 | 4.83 |
| -9 | 5 | -1 | 182.10 | 4.51 |
| -9 | 5 | 0  | 356.00 | 7.28 |
| -9 | 5 | 0  | 317.75 | 8.29 |
| -9 | 5 | 0  | 327.89 | 8.51 |

## CIF 31

|    |   |   |        |       |
|----|---|---|--------|-------|
| -9 | 5 | 0 | 342.29 | 6.65  |
| -9 | 5 | 0 | 329.18 | 6.98  |
| -9 | 5 | 0 | 350.05 | 8.28  |
| -9 | 5 | 0 | 359.05 | 6.59  |
| -9 | 5 | 0 | 353.64 | 7.27  |
| -9 | 5 | 1 | 65.05  | 2.93  |
| -9 | 5 | 1 | 63.60  | 3.79  |
| -9 | 5 | 1 | 56.51  | 2.45  |
| -9 | 5 | 1 | 65.33  | 3.05  |
| -9 | 5 | 1 | 49.97  | 3.52  |
| -9 | 5 | 1 | 51.91  | 3.32  |
| -9 | 5 | 1 | 52.38  | 3.33  |
| -9 | 5 | 1 | 51.58  | 3.10  |
| -9 | 5 | 1 | 65.89  | 2.99  |
| -9 | 5 | 2 | 148.01 | 5.32  |
| -9 | 5 | 2 | 143.33 | 5.57  |
| -9 | 5 | 2 | 136.54 | 3.76  |
| -9 | 5 | 2 | 142.77 | 4.26  |
| -9 | 5 | 2 | 148.81 | 5.67  |
| -9 | 5 | 2 | 145.63 | 6.02  |
| -9 | 5 | 2 | 158.13 | 5.93  |
| -9 | 5 | 3 | 0.80   | 0.62  |
| -9 | 5 | 3 | 4.06   | 1.68  |
| -9 | 5 | 3 | -0.06  | 1.09  |
| -9 | 5 | 3 | 1.93   | 1.39  |
| -9 | 5 | 3 | 1.17   | 0.80  |
| -9 | 5 | 3 | 0.69   | 1.13  |
| -9 | 5 | 3 | 4.66   | 1.54  |
| -9 | 5 | 3 | 0.83   | 1.25  |
| -9 | 5 | 4 | 95.84  | 3.15  |
| -9 | 5 | 4 | 114.33 | 5.16  |
| -9 | 5 | 4 | 123.71 | 5.73  |
| -9 | 5 | 4 | 118.23 | 4.93  |
| -9 | 5 | 4 | 112.13 | 4.98  |
| -9 | 5 | 4 | 117.48 | 5.10  |
| -9 | 5 | 4 | 89.67  | 4.65  |
| -9 | 5 | 4 | 112.80 | 4.84  |
| -9 | 5 | 4 | 102.20 | 3.96  |
| -9 | 5 | 4 | 104.54 | 3.48  |
| -9 | 5 | 5 | 393.98 | 10.46 |
| -9 | 5 | 5 | 422.64 | 9.88  |



CIF 31

|    |   |   |        |      |
|----|---|---|--------|------|
| -9 | 5 | 5 | 412.41 | 8.37 |
| -9 | 5 | 5 | 436.90 | 9.75 |
| -9 | 5 | 5 | 418.75 | 9.75 |
| -9 | 5 | 5 | 428.04 | 9.87 |
| -9 | 5 | 5 | 382.15 | 9.73 |
| -9 | 5 | 6 | 36.48  | 2.30 |
| -9 | 5 | 6 | 38.21  | 2.47 |
| -9 | 5 | 6 | 35.88  | 2.98 |
| -9 | 5 | 6 | 32.69  | 2.94 |
| -9 | 5 | 6 | 33.39  | 2.87 |
| -9 | 5 | 6 | 35.92  | 2.96 |
| -9 | 5 | 6 | 35.40  | 2.76 |
| -9 | 5 | 6 | 31.37  | 2.84 |
| -9 | 5 | 7 | 24.08  | 1.95 |
| -9 | 5 | 7 | 22.73  | 2.14 |
| -9 | 5 | 7 | 20.67  | 1.84 |
| -9 | 5 | 7 | 20.81  | 2.67 |
| -9 | 5 | 7 | 23.02  | 2.18 |
| -9 | 5 | 7 | 20.57  | 2.41 |
| -9 | 5 | 7 | 26.73  | 2.11 |
| -9 | 5 | 7 | 24.27  | 1.98 |
| -9 | 5 | 7 | 21.87  | 2.32 |
| -9 | 5 | 8 | 12.81  | 1.93 |
| -9 | 5 | 8 | 10.31  | 1.59 |
| -9 | 5 | 8 | 11.89  | 1.52 |
| -9 | 5 | 8 | 8.46   | 1.31 |
| -9 | 5 | 8 | 12.91  | 1.59 |
| -9 | 5 | 8 | 9.62   | 1.38 |
| -9 | 5 | 8 | 9.93   | 1.65 |
| -9 | 5 | 8 | 9.00   | 1.35 |
| -9 | 5 | 8 | 11.79  | 2.27 |
| -9 | 5 | 9 | 61.36  | 2.91 |
| -9 | 5 | 9 | 64.47  | 3.35 |
| -9 | 5 | 9 | 62.44  | 2.99 |
| -9 | 5 | 9 | 56.65  | 3.07 |
| -9 | 5 | 9 | 56.20  | 2.82 |
| -9 | 5 | 9 | 60.93  | 3.34 |
| -9 | 5 | 9 | 66.86  | 2.98 |
| -9 | 5 | 9 | 54.78  | 3.57 |
| -9 | 5 | 9 | 56.71  | 3.31 |
| -9 | 5 | 9 | 65.08  | 3.52 |

## CIF 31

|    |   |    |        |      |
|----|---|----|--------|------|
| -9 | 5 | 10 | 136.55 | 4.46 |
| -9 | 5 | 10 | 122.28 | 4.46 |
| -9 | 5 | 10 | 131.58 | 4.57 |
| -9 | 5 | 10 | 132.17 | 4.67 |
| -9 | 5 | 10 | 133.24 | 4.46 |
| -9 | 5 | 10 | 129.70 | 4.84 |
| -9 | 5 | 10 | 132.55 | 4.14 |
| -9 | 5 | 10 | 128.69 | 4.01 |
| -9 | 5 | 11 | 334.20 | 6.76 |
| -9 | 5 | 11 | 421.43 | 7.05 |
| -9 | 5 | 11 | 372.48 | 7.21 |
| -9 | 5 | 11 | 385.17 | 6.92 |
| -9 | 5 | 11 | 369.86 | 7.32 |
| -9 | 5 | 11 | 412.08 | 6.87 |
| -9 | 5 | 12 | 16.09  | 1.15 |
| -9 | 5 | 12 | 13.54  | 1.12 |
| -9 | 6 | -7 | 14.63  | 1.44 |
| -9 | 6 | -7 | 12.67  | 1.18 |
| -9 | 6 | -7 | 13.53  | 1.14 |
| -9 | 6 | -7 | 12.43  | 0.87 |
| -9 | 6 | -6 | 51.46  | 2.22 |
| -9 | 6 | -6 | 47.05  | 1.91 |
| -9 | 6 | -6 | 51.88  | 2.00 |
| -9 | 6 | -6 | 52.23  | 2.20 |
| -9 | 6 | -6 | 54.75  | 2.33 |
| -9 | 6 | -5 | 236.28 | 4.93 |
| -9 | 6 | -5 | 231.20 | 5.28 |
| -9 | 6 | -5 | 261.98 | 5.40 |
| -9 | 6 | -5 | 258.78 | 5.53 |
| -9 | 6 | -5 | 252.43 | 5.03 |
| -9 | 6 | -4 | 20.98  | 1.78 |
| -9 | 6 | -4 | 20.90  | 1.59 |
| -9 | 6 | -4 | 20.75  | 1.85 |
| -9 | 6 | -3 | 2.53   | 0.94 |
| -9 | 6 | -3 | 1.37   | 0.95 |
| -9 | 6 | -3 | 1.62   | 1.04 |
| -9 | 6 | -2 | 2.15   | 1.14 |
| -9 | 6 | -2 | 3.53   | 1.04 |
| -9 | 6 | -2 | 3.20   | 1.10 |
| -9 | 6 | -2 | 4.07   | 1.18 |
| -9 | 6 | -1 | 134.44 | 4.17 |

## CIF 31

|    |   |    |        |      |
|----|---|----|--------|------|
| -9 | 6 | -1 | 139.63 | 4.31 |
| -9 | 6 | -1 | 129.77 | 3.93 |
| -9 | 6 | 0  | 7.35   | 1.44 |
| -9 | 6 | 0  | 5.36   | 1.10 |
| -9 | 6 | 0  | 8.97   | 1.72 |
| -9 | 6 | 0  | 6.51   | 1.25 |
| -9 | 6 | 0  | 9.21   | 1.79 |
| -9 | 6 | 1  | 121.70 | 5.31 |
| -9 | 6 | 1  | 148.33 | 4.22 |
| -9 | 6 | 1  | 122.42 | 4.51 |
| -9 | 6 | 1  | 140.05 | 4.14 |
| -9 | 6 | 1  | 130.19 | 3.77 |
| -9 | 6 | 1  | 145.65 | 5.74 |
| -9 | 6 | 1  | 150.94 | 4.45 |
| -9 | 6 | 1  | 126.27 | 5.08 |
| -9 | 6 | 1  | 129.43 | 4.92 |
| -9 | 6 | 2  | 86.58  | 4.55 |
| -9 | 6 | 2  | 85.17  | 4.33 |
| -9 | 6 | 2  | 98.98  | 4.82 |
| -9 | 6 | 2  | 95.09  | 3.27 |
| -9 | 6 | 2  | 85.46  | 4.09 |
| -9 | 6 | 2  | 94.62  | 3.48 |
| -9 | 6 | 2  | 89.03  | 4.21 |
| -9 | 6 | 2  | 102.27 | 3.39 |
| -9 | 6 | 2  | 97.58  | 3.27 |
| -9 | 6 | 2  | 85.30  | 3.92 |
| -9 | 6 | 2  | 95.68  | 4.63 |
| -9 | 6 | 3  | 3.67   | 1.39 |
| -9 | 6 | 3  | 2.78   | 1.24 |
| -9 | 6 | 3  | 0.74   | 0.72 |
| -9 | 6 | 3  | 1.90   | 0.75 |
| -9 | 6 | 3  | 2.88   | 1.28 |
| -9 | 6 | 3  | 3.25   | 1.38 |
| -9 | 6 | 3  | 0.81   | 0.66 |
| -9 | 6 | 3  | 1.58   | 1.58 |
| -9 | 6 | 3  | 2.87   | 1.31 |
| -9 | 6 | 4  | 11.92  | 1.36 |
| -9 | 6 | 4  | 11.68  | 2.04 |
| -9 | 6 | 4  | 12.30  | 1.55 |
| -9 | 6 | 4  | 9.87   | 1.83 |
| -9 | 6 | 4  | 11.61  | 2.16 |

## CIF 31

|    |   |   |        |      |
|----|---|---|--------|------|
| -9 | 6 | 4 | 11.10  | 1.98 |
| -9 | 6 | 4 | 12.18  | 1.86 |
| -9 | 6 | 4 | 11.76  | 1.88 |
| -9 | 6 | 4 | 12.15  | 1.85 |
| -9 | 6 | 5 | 131.01 | 5.42 |
| -9 | 6 | 5 | 145.50 | 5.53 |
| -9 | 6 | 5 | 141.93 | 6.23 |
| -9 | 6 | 5 | 131.33 | 5.27 |
| -9 | 6 | 5 | 149.01 | 5.46 |
| -9 | 6 | 5 | 146.93 | 4.82 |
| -9 | 6 | 5 | 144.03 | 5.69 |
| -9 | 6 | 5 | 133.05 | 4.09 |
| -9 | 6 | 5 | 146.33 | 5.57 |
| -9 | 6 | 6 | 298.68 | 7.21 |
| -9 | 6 | 6 | 303.62 | 8.08 |
| -9 | 6 | 6 | 292.01 | 8.16 |
| -9 | 6 | 6 | 295.88 | 7.61 |
| -9 | 6 | 6 | 282.90 | 6.73 |
| -9 | 6 | 6 | 296.23 | 7.88 |
| -9 | 6 | 7 | 5.60   | 1.36 |
| -9 | 6 | 7 | 5.77   | 1.36 |
| -9 | 6 | 7 | 5.67   | 1.09 |
| -9 | 6 | 7 | 8.02   | 1.70 |
| -9 | 6 | 7 | 4.47   | 1.61 |
| -9 | 6 | 7 | 5.22   | 1.91 |
| -9 | 6 | 7 | 5.79   | 1.43 |
| -9 | 6 | 7 | 5.22   | 1.65 |
| -9 | 6 | 8 | 38.23  | 2.42 |
| -9 | 6 | 8 | 41.84  | 3.25 |
| -9 | 6 | 8 | 41.35  | 2.83 |
| -9 | 6 | 8 | 47.07  | 2.37 |
| -9 | 6 | 8 | 40.10  | 2.25 |
| -9 | 6 | 8 | 39.20  | 2.89 |
| -9 | 6 | 8 | 45.79  | 2.80 |
| -9 | 6 | 8 | 46.03  | 2.44 |
| -9 | 6 | 9 | 17.59  | 2.12 |
| -9 | 6 | 9 | 15.72  | 1.49 |
| -9 | 6 | 9 | 12.17  | 1.54 |
| -9 | 6 | 9 | 17.32  | 1.89 |
| -9 | 6 | 9 | 16.60  | 1.45 |
| -9 | 6 | 9 | 16.75  | 1.77 |

## CIF 31

|    |   |    |        |      |
|----|---|----|--------|------|
| -9 | 6 | 9  | 14.82  | 1.86 |
| -9 | 6 | 9  | 14.58  | 1.48 |
| -9 | 6 | 10 | 170.47 | 4.03 |
| -9 | 6 | 10 | 168.89 | 4.20 |
| -9 | 6 | 10 | 147.59 | 4.76 |
| -9 | 6 | 10 | 152.22 | 4.62 |
| -9 | 6 | 10 | 158.46 | 4.76 |
| -9 | 6 | 10 | 162.92 | 4.68 |
| -9 | 6 | 10 | 172.94 | 4.74 |
| -9 | 6 | 11 | 4.25   | 0.94 |
| -9 | 6 | 11 | 4.96   | 0.93 |
| -9 | 6 | 11 | 3.33   | 0.90 |
| -9 | 6 | 11 | 3.93   | 0.67 |
| -9 | 7 | -7 | 5.27   | 1.61 |
| -9 | 7 | -7 | 5.96   | 1.15 |
| -9 | 7 | -7 | 5.58   | 0.68 |
| -9 | 7 | -7 | 5.48   | 1.29 |
| -9 | 7 | -6 | 46.13  | 1.94 |
| -9 | 7 | -6 | 45.95  | 1.88 |
| -9 | 7 | -6 | 46.39  | 2.07 |
| -9 | 7 | -6 | 51.59  | 2.03 |
| -9 | 7 | -5 | 0.49   | 0.86 |
| -9 | 7 | -5 | 0.57   | 0.80 |
| -9 | 7 | -5 | 0.99   | 0.94 |
| -9 | 7 | -5 | 1.04   | 0.81 |
| -9 | 7 | -4 | 241.60 | 5.45 |
| -9 | 7 | -4 | 240.59 | 5.19 |
| -9 | 7 | -4 | 239.68 | 5.14 |
| -9 | 7 | -4 | 236.69 | 5.28 |
| -9 | 7 | -3 | 396.70 | 7.32 |
| -9 | 7 | -3 | 401.60 | 7.14 |
| -9 | 7 | -3 | 413.23 | 7.34 |
| -9 | 7 | -2 | 6.93   | 1.45 |
| -9 | 7 | -2 | 6.73   | 1.18 |
| -9 | 7 | -2 | 7.11   | 1.20 |
| -9 | 7 | -1 | 1.66   | 0.92 |
| -9 | 7 | -1 | 2.51   | 1.33 |
| -9 | 7 | -1 | 1.75   | 0.93 |
| -9 | 7 | -1 | 1.94   | 0.86 |
| -9 | 7 | 0  | 40.83  | 2.94 |
| -9 | 7 | 0  | 37.00  | 2.15 |

## CIF 31

|    |   |   |        |      |
|----|---|---|--------|------|
| -9 | 7 | 0 | 34.85  | 1.98 |
| -9 | 7 | 0 | 31.01  | 1.89 |
| -9 | 7 | 0 | 35.02  | 2.95 |
| -9 | 7 | 1 | 55.79  | 3.11 |
| -9 | 7 | 1 | 59.45  | 2.61 |
| -9 | 7 | 1 | 68.39  | 3.97 |
| -9 | 7 | 1 | 60.49  | 2.45 |
| -9 | 7 | 1 | 57.84  | 3.68 |
| -9 | 7 | 1 | 66.79  | 2.78 |
| -9 | 7 | 1 | 59.81  | 3.31 |
| -9 | 7 | 2 | 58.22  | 3.41 |
| -9 | 7 | 2 | 59.43  | 3.88 |
| -9 | 7 | 2 | 64.00  | 3.49 |
| -9 | 7 | 2 | 63.57  | 2.71 |
| -9 | 7 | 2 | 61.76  | 3.68 |
| -9 | 7 | 2 | 59.73  | 3.85 |
| -9 | 7 | 2 | 64.77  | 3.44 |
| -9 | 7 | 2 | 57.12  | 3.04 |
| -9 | 7 | 2 | 60.64  | 2.69 |
| -9 | 7 | 3 | 0.17   | 1.15 |
| -9 | 7 | 3 | 0.88   | 0.71 |
| -9 | 7 | 3 | -0.27  | 1.25 |
| -9 | 7 | 3 | 1.30   | 1.13 |
| -9 | 7 | 3 | -0.20  | 1.06 |
| -9 | 7 | 3 | 3.03   | 1.32 |
| -9 | 7 | 3 | 0.21   | 0.77 |
| -9 | 7 | 3 | 0.88   | 1.48 |
| -9 | 7 | 3 | 0.11   | 1.07 |
| -9 | 7 | 4 | 295.36 | 8.17 |
| -9 | 7 | 4 | 287.54 | 7.55 |
| -9 | 7 | 4 | 296.77 | 8.62 |
| -9 | 7 | 4 | 282.41 | 7.73 |
| -9 | 7 | 4 | 297.04 | 7.75 |
| -9 | 7 | 4 | 301.15 | 8.11 |
| -9 | 7 | 4 | 287.87 | 7.47 |
| -9 | 7 | 4 | 307.48 | 6.33 |
| -9 | 7 | 5 | 32.24  | 3.09 |
| -9 | 7 | 5 | 30.49  | 2.58 |
| -9 | 7 | 5 | 29.34  | 2.70 |
| -9 | 7 | 5 | 29.56  | 2.70 |
| -9 | 7 | 5 | 31.92  | 1.98 |

## CIF 31

|    |   |    |        |      |
|----|---|----|--------|------|
| -9 | 7 | 5  | 31.13  | 2.60 |
| -9 | 7 | 5  | 28.62  | 2.67 |
| -9 | 7 | 5  | 35.98  | 2.76 |
| -9 | 7 | 6  | 7.20   | 1.45 |
| -9 | 7 | 6  | 4.48   | 1.13 |
| -9 | 7 | 6  | 4.88   | 1.42 |
| -9 | 7 | 6  | 3.67   | 1.28 |
| -9 | 7 | 6  | 5.46   | 1.13 |
| -9 | 7 | 6  | 4.55   | 1.37 |
| -9 | 7 | 6  | 5.43   | 1.54 |
| -9 | 7 | 6  | 4.94   | 1.58 |
| -9 | 7 | 6  | 5.54   | 0.98 |
| -9 | 7 | 7  | 22.00  | 1.80 |
| -9 | 7 | 7  | 22.27  | 2.19 |
| -9 | 7 | 7  | 26.54  | 2.11 |
| -9 | 7 | 7  | 24.27  | 2.39 |
| -9 | 7 | 7  | 22.37  | 1.88 |
| -9 | 7 | 7  | 24.00  | 2.63 |
| -9 | 7 | 7  | 20.74  | 2.23 |
| -9 | 7 | 7  | 26.05  | 2.41 |
| -9 | 7 | 8  | 385.11 | 8.27 |
| -9 | 7 | 8  | 345.57 | 7.82 |
| -9 | 7 | 8  | 382.84 | 7.56 |
| -9 | 7 | 8  | 351.44 | 8.52 |
| -9 | 7 | 9  | 5.60   | 1.35 |
| -9 | 7 | 9  | 5.28   | 1.06 |
| -9 | 7 | 9  | 3.89   | 1.08 |
| -9 | 7 | 9  | 3.90   | 1.21 |
| -9 | 7 | 10 | 32.97  | 2.06 |
| -9 | 7 | 10 | 38.53  | 2.11 |
| -9 | 7 | 10 | 31.50  | 1.93 |
| -9 | 7 | 10 | 41.45  | 2.01 |
| -9 | 7 | 10 | 30.19  | 1.91 |
| -9 | 7 | 11 | 1.39   | 0.63 |
| -9 | 7 | 11 | 2.05   | 0.57 |
| -9 | 8 | -7 | 90.74  | 2.22 |
| -9 | 8 | -7 | 96.35  | 2.24 |
| -9 | 8 | -6 | 13.90  | 1.36 |
| -9 | 8 | -6 | 13.58  | 1.56 |
| -9 | 8 | -6 | 14.91  | 1.19 |
| -9 | 8 | -6 | 13.83  | 1.14 |

## CIF 31

|    |   |    |        |      |
|----|---|----|--------|------|
| -9 | 8 | -5 | 184.41 | 3.92 |
| -9 | 8 | -5 | 186.77 | 4.23 |
| -9 | 8 | -5 | 174.69 | 3.53 |
| -9 | 8 | -4 | 76.38  | 2.48 |
| -9 | 8 | -4 | 72.03  | 2.55 |
| -9 | 8 | -4 | 81.25  | 2.91 |
| -9 | 8 | -4 | 77.22  | 2.87 |
| -9 | 8 | -3 | 260.59 | 6.34 |
| -9 | 8 | -3 | 297.39 | 5.92 |
| -9 | 8 | -3 | 300.77 | 5.96 |
| -9 | 8 | -3 | 279.69 | 5.33 |
| -9 | 8 | -3 | 273.99 | 5.19 |
| -9 | 8 | -2 | 15.53  | 1.59 |
| -9 | 8 | -2 | 14.82  | 1.47 |
| -9 | 8 | -2 | 14.16  | 1.29 |
| -9 | 8 | -2 | 12.33  | 1.73 |
| -9 | 8 | -2 | 14.40  | 1.30 |
| -9 | 8 | -1 | 184.45 | 4.51 |
| -9 | 8 | -1 | 175.28 | 5.92 |
| -9 | 8 | -1 | 190.48 | 4.34 |
| -9 | 8 | -1 | 184.99 | 4.56 |
| -9 | 8 | 0  | 36.23  | 2.67 |
| -9 | 8 | 0  | 36.30  | 2.98 |
| -9 | 8 | 0  | 40.25  | 2.14 |
| -9 | 8 | 0  | 42.09  | 2.03 |
| -9 | 8 | 0  | 39.30  | 1.98 |
| -9 | 8 | 1  | 90.11  | 4.36 |
| -9 | 8 | 1  | 92.75  | 3.64 |
| -9 | 8 | 1  | 96.45  | 4.58 |
| -9 | 8 | 1  | 99.29  | 3.02 |
| -9 | 8 | 1  | 101.72 | 3.44 |
| -9 | 8 | 1  | 90.63  | 4.19 |
| -9 | 8 | 1  | 90.15  | 4.54 |
| -9 | 8 | 2  | 139.76 | 3.54 |
| -9 | 8 | 2  | 158.71 | 4.36 |
| -9 | 8 | 2  | 139.38 | 4.74 |
| -9 | 8 | 2  | 143.60 | 4.76 |
| -9 | 8 | 2  | 147.93 | 5.82 |
| -9 | 8 | 2  | 144.65 | 5.63 |
| -9 | 8 | 2  | 135.95 | 4.88 |
| -9 | 8 | 2  | 140.96 | 5.30 |



## CIF 31

|    |   |   |        |      |
|----|---|---|--------|------|
| -9 | 8 | 3 | 10.67  | 1.72 |
| -9 | 8 | 3 | 11.28  | 1.80 |
| -9 | 8 | 3 | 12.18  | 1.31 |
| -9 | 8 | 3 | 8.45   | 1.91 |
| -9 | 8 | 3 | 10.98  | 1.50 |
| -9 | 8 | 3 | 10.65  | 1.59 |
| -9 | 8 | 3 | 12.25  | 2.15 |
| -9 | 8 | 3 | 10.62  | 1.57 |
| -9 | 8 | 4 | 96.27  | 4.13 |
| -9 | 8 | 4 | 92.61  | 4.74 |
| -9 | 8 | 4 | 92.77  | 4.50 |
| -9 | 8 | 4 | 85.93  | 4.06 |
| -9 | 8 | 4 | 92.14  | 4.41 |
| -9 | 8 | 4 | 96.25  | 4.11 |
| -9 | 8 | 4 | 95.73  | 3.35 |
| -9 | 8 | 4 | 95.27  | 3.96 |
| -9 | 8 | 4 | 82.58  | 4.10 |
| -9 | 8 | 5 | 307.49 | 7.80 |
| -9 | 8 | 5 | 316.50 | 8.09 |
| -9 | 8 | 5 | 324.80 | 7.68 |
| -9 | 8 | 5 | 308.64 | 7.58 |
| -9 | 8 | 5 | 319.86 | 7.59 |
| -9 | 8 | 5 | 311.82 | 8.58 |
| -9 | 8 | 6 | 37.73  | 2.68 |
| -9 | 8 | 6 | 38.10  | 2.75 |
| -9 | 8 | 6 | 43.39  | 2.61 |
| -9 | 8 | 6 | 36.22  | 2.58 |
| -9 | 8 | 6 | 33.35  | 2.59 |
| -9 | 8 | 7 | 2.15   | 0.84 |
| -9 | 8 | 7 | 1.41   | 0.93 |
| -9 | 8 | 7 | 2.22   | 0.91 |
| -9 | 8 | 7 | 1.98   | 1.20 |
| -9 | 8 | 7 | 1.99   | 1.48 |
| -9 | 8 | 7 | 1.48   | 0.74 |
| -9 | 8 | 7 | 2.64   | 1.14 |
| -9 | 8 | 7 | 1.48   | 1.20 |
| -9 | 8 | 8 | 7.53   | 1.29 |
| -9 | 8 | 8 | 8.64   | 1.42 |
| -9 | 8 | 8 | 8.55   | 1.09 |
| -9 | 8 | 8 | 7.18   | 1.47 |
| -9 | 8 | 8 | 7.63   | 1.33 |

## CIF 31

|    |   |    |        |      |
|----|---|----|--------|------|
| -9 | 8 | 9  | 38.23  | 2.13 |
| -9 | 8 | 9  | 35.20  | 2.15 |
| -9 | 8 | 10 | 243.83 | 4.43 |
| -9 | 8 | 10 | 215.25 | 4.35 |
| -9 | 9 | -6 | 44.22  | 2.09 |
| -9 | 9 | -6 | 48.69  | 1.76 |
| -9 | 9 | -6 | 49.40  | 1.81 |
| -9 | 9 | -5 | 27.97  | 1.86 |
| -9 | 9 | -5 | 28.71  | 1.61 |
| -9 | 9 | -4 | 13.16  | 1.36 |
| -9 | 9 | -4 | 16.74  | 1.46 |
| -9 | 9 | -3 | 52.18  | 2.19 |
| -9 | 9 | -3 | 54.89  | 2.42 |
| -9 | 9 | -2 | 98.77  | 4.01 |
| -9 | 9 | -2 | 95.99  | 2.90 |
| -9 | 9 | -1 | 13.70  | 1.47 |
| -9 | 9 | -1 | 10.92  | 1.73 |
| -9 | 9 | -1 | 8.46   | 1.72 |
| -9 | 9 | 0  | 328.49 | 7.47 |
| -9 | 9 | 0  | 309.33 | 8.18 |
| -9 | 9 | 1  | 51.82  | 3.18 |
| -9 | 9 | 1  | 57.37  | 3.11 |
| -9 | 9 | 1  | 53.18  | 3.40 |
| -9 | 9 | 2  | 1.01   | 1.14 |
| -9 | 9 | 2  | 0.83   | 1.25 |
| -9 | 9 | 2  | 1.44   | 1.03 |
| -9 | 9 | 2  | 0.72   | 0.89 |
| -9 | 9 | 3  | 27.80  | 2.17 |
| -9 | 9 | 3  | 29.56  | 2.06 |
| -9 | 9 | 3  | 29.10  | 2.56 |
| -9 | 9 | 3  | 29.47  | 2.43 |
| -9 | 9 | 3  | 32.25  | 2.76 |
| -9 | 9 | 3  | 30.81  | 2.18 |
| -9 | 9 | 4  | 4.13   | 1.53 |
| -9 | 9 | 4  | 4.34   | 1.19 |
| -9 | 9 | 4  | 3.49   | 1.22 |
| -9 | 9 | 4  | 3.93   | 1.24 |
| -9 | 9 | 4  | 4.38   | 1.30 |
| -9 | 9 | 4  | 3.74   | 1.11 |
| -9 | 9 | 4  | 6.74   | 1.33 |
| -9 | 9 | 5  | 10.27  | 1.48 |

## CIF 31

|    |    |    |        |      |
|----|----|----|--------|------|
| -9 | 9  | 5  | 12.85  | 1.59 |
| -9 | 9  | 5  | 11.28  | 1.42 |
| -9 | 9  | 5  | 12.15  | 1.57 |
| -9 | 9  | 5  | 10.75  | 1.54 |
| -9 | 9  | 5  | 11.36  | 1.64 |
| -9 | 9  | 5  | 12.41  | 1.91 |
| -9 | 9  | 5  | 9.18   | 1.42 |
| -9 | 9  | 6  | 43.19  | 2.61 |
| -9 | 9  | 6  | 51.52  | 2.77 |
| -9 | 9  | 6  | 51.59  | 2.36 |
| -9 | 9  | 6  | 48.89  | 2.79 |
| -9 | 9  | 6  | 53.91  | 2.70 |
| -9 | 9  | 6  | 52.83  | 2.69 |
| -9 | 9  | 7  | 36.26  | 2.48 |
| -9 | 9  | 7  | 34.98  | 2.07 |
| -9 | 9  | 7  | 32.45  | 2.10 |
| -9 | 9  | 7  | 32.25  | 2.09 |
| -9 | 9  | 8  | 56.02  | 2.64 |
| -9 | 9  | 8  | 62.43  | 2.45 |
| -9 | 9  | 8  | 63.80  | 2.50 |
| -9 | 10 | -6 | 28.57  | 1.17 |
| -9 | 10 | -5 | 135.53 | 2.73 |
| -9 | 10 | -4 | 456.67 | 5.82 |
| -9 | 10 | -3 | 1.09   | 0.81 |
| -9 | 10 | -2 | 77.64  | 3.28 |
| -9 | 10 | -1 | 11.53  | 1.61 |
| -9 | 10 | 1  | 1.38   | 0.96 |
| -9 | 10 | 1  | 0.83   | 0.99 |
| -9 | 10 | 2  | 314.43 | 7.42 |
| -9 | 10 | 2  | 317.19 | 7.46 |
| -9 | 10 | 2  | 318.91 | 6.90 |
| -9 | 10 | 2  | 322.48 | 7.71 |
| -9 | 10 | 3  | 1.69   | 1.04 |
| -9 | 10 | 3  | 2.92   | 1.35 |
| -9 | 10 | 3  | 2.95   | 0.96 |
| -9 | 10 | 3  | 2.16   | 1.17 |
| -9 | 10 | 4  | -0.27  | 0.85 |
| -9 | 10 | 4  | 0.15   | 0.86 |
| -9 | 10 | 4  | 0.19   | 0.67 |
| -9 | 10 | 4  | -0.37  | 1.18 |
| -9 | 10 | 4  | -0.31  | 0.71 |

## CIF 31

|    |    |    |        |      |
|----|----|----|--------|------|
| -9 | 10 | 5  | 32.35  | 1.92 |
| -9 | 10 | 5  | 38.16  | 2.54 |
| -9 | 10 | 5  | 31.21  | 1.80 |
| -9 | 10 | 5  | 36.56  | 1.93 |
| -9 | 10 | 6  | 89.99  | 2.84 |
| -9 | 10 | 6  | 77.68  | 2.45 |
| -9 | 10 | 7  | 3.94   | 0.88 |
| -9 | 10 | 7  | 3.70   | 0.71 |
| -9 | 11 | -4 | 24.23  | 1.18 |
| -9 | 11 | -3 | 27.52  | 1.36 |
| -9 | 11 | -3 | 20.56  | 1.31 |
| -9 | 11 | -2 | 199.68 | 4.64 |
| -9 | 11 | -2 | 208.24 | 3.97 |
| -9 | 11 | -1 | 93.40  | 2.63 |
| -9 | 11 | -1 | 76.49  | 3.12 |
| -9 | 11 | 0  | 12.23  | 1.47 |
| -9 | 11 | 0  | 14.62  | 1.18 |
| -9 | 11 | 1  | 258.87 | 5.41 |
| -9 | 11 | 2  | 0.80   | 0.88 |
| -9 | 11 | 2  | 0.40   | 0.82 |
| -9 | 11 | 3  | 55.63  | 2.40 |
| -9 | 11 | 3  | 60.63  | 2.70 |
| -9 | 11 | 4  | 8.07   | 1.19 |
| -9 | 11 | 4  | 5.17   | 0.76 |
| -9 | 11 | 5  | 0.16   | 0.67 |
| -9 | 12 | -1 | 2.98   | 0.48 |
| -9 | 12 | -1 | 1.85   | 0.59 |
| -9 | 12 | 0  | 53.31  | 2.04 |
| -9 | 12 | 0  | 66.47  | 1.65 |
| -9 | 12 | 1  | 46.25  | 1.35 |
| -9 | 12 | 1  | 34.81  | 1.62 |
| -8 | -6 | 2  | 64.12  | 1.66 |
| -8 | -6 | 3  | 62.34  | 1.63 |
| -8 | -6 | 3  | 66.71  | 1.79 |
| -8 | -6 | 4  | 145.51 | 2.81 |
| -8 | -6 | 4  | 173.15 | 3.14 |
| -8 | -6 | 5  | 16.61  | 1.07 |
| -8 | -6 | 5  | 12.53  | 0.78 |
| -8 | -6 | 6  | 47.61  | 1.98 |
| -8 | -6 | 7  | 5.46   | 0.85 |
| -8 | -6 | 7  | 5.02   | 0.88 |

## CIF 31

|    |    |   |        |      |
|----|----|---|--------|------|
| -8 | -6 | 7 | 5.57   | 0.74 |
| -8 | -6 | 8 | 4.55   | 0.78 |
| -8 | -6 | 8 | 3.95   | 0.80 |
| -8 | -6 | 8 | 5.78   | 0.69 |
| -8 | -6 | 9 | 0.61   | 0.37 |
| -8 | -6 | 9 | 0.14   | 0.52 |
| -8 | -6 | 9 | 0.60   | 0.52 |
| -8 | -5 | 0 | 32.97  | 1.14 |
| -8 | -5 | 1 | 9.40   | 0.72 |
| -8 | -5 | 1 | 12.92  | 1.04 |
| -8 | -5 | 2 | 55.90  | 2.07 |
| -8 | -5 | 2 | 51.63  | 1.83 |
| -8 | -5 | 3 | 0.83   | 0.65 |
| -8 | -5 | 3 | 1.01   | 0.65 |
| -8 | -5 | 4 | 95.20  | 2.86 |
| -8 | -5 | 4 | 90.49  | 2.66 |
| -8 | -5 | 5 | 186.09 | 4.89 |
| -8 | -5 | 5 | 183.88 | 4.75 |
| -8 | -5 | 6 | 72.00  | 2.08 |
| -8 | -5 | 6 | 71.39  | 3.04 |
| -8 | -5 | 6 | 70.32  | 2.90 |
| -8 | -5 | 6 | 69.47  | 3.19 |
| -8 | -5 | 7 | 2.81   | 0.84 |
| -8 | -5 | 7 | 1.64   | 1.03 |
| -8 | -5 | 7 | 2.92   | 1.12 |
| -8 | -5 | 7 | 1.23   | 0.91 |
| -8 | -5 | 7 | 2.47   | 0.75 |
| -8 | -5 | 7 | 1.67   | 0.91 |
| -8 | -5 | 8 | 1.85   | 0.74 |
| -8 | -5 | 8 | 1.60   | 0.98 |
| -8 | -5 | 8 | 1.57   | 0.92 |
| -8 | -5 | 8 | 1.03   | 0.67 |
| -8 | -5 | 8 | 1.45   | 0.92 |
| -8 | -5 | 8 | 1.06   | 0.89 |
| -8 | -5 | 9 | 205.09 | 4.18 |
| -8 | -5 | 9 | 257.03 | 5.41 |
| -8 | -5 | 9 | 250.97 | 5.24 |
| -8 | -5 | 9 | 225.13 | 5.39 |
| -8 | -5 | 9 | 258.35 | 4.30 |
| -8 | -5 | 9 | 231.14 | 5.19 |
| -8 | -5 | 9 | 236.85 | 5.16 |

## CIF 31

|    |    |    |        |       |
|----|----|----|--------|-------|
| -8 | -5 | 10 | 0.14   | 0.69  |
| -8 | -5 | 10 | 0.45   | 0.72  |
| -8 | -5 | 10 | 0.63   | 0.38  |
| -8 | -5 | 10 | 0.13   | 0.67  |
| -8 | -5 | 10 | 0.73   | 0.62  |
| -8 | -5 | 10 | 0.86   | 0.76  |
| -8 | -5 | 11 | 142.74 | 3.42  |
| -8 | -5 | 11 | 151.85 | 3.53  |
| -8 | -5 | 11 | 141.67 | 3.29  |
| -8 | -4 | -2 | -0.01  | 0.42  |
| -8 | -4 | -2 | 0.24   | 0.52  |
| -8 | -4 | -1 | 33.21  | 1.51  |
| -8 | -4 | 0  | 1.10   | 0.62  |
| -8 | -4 | 0  | 1.02   | 0.75  |
| -8 | -4 | 1  | 39.83  | 1.76  |
| -8 | -4 | 1  | 39.60  | 2.02  |
| -8 | -4 | 1  | 40.21  | 1.76  |
| -8 | -4 | 2  | 109.20 | 3.35  |
| -8 | -4 | 2  | 104.03 | 3.12  |
| -8 | -4 | 2  | 108.83 | 3.02  |
| -8 | -4 | 3  | 124.04 | 3.54  |
| -8 | -4 | 3  | 101.52 | 3.71  |
| -8 | -4 | 3  | 99.87  | 3.72  |
| -8 | -4 | 3  | 127.51 | 3.59  |
| -8 | -4 | 4  | 58.61  | 2.95  |
| -8 | -4 | 4  | 66.33  | 2.57  |
| -8 | -4 | 4  | 70.27  | 2.79  |
| -8 | -4 | 4  | 59.35  | 2.89  |
| -8 | -4 | 4  | 59.32  | 3.41  |
| -8 | -4 | 5  | 139.43 | 5.22  |
| -8 | -4 | 5  | 139.97 | 4.52  |
| -8 | -4 | 5  | 139.87 | 4.60  |
| -8 | -4 | 5  | 170.25 | 3.92  |
| -8 | -4 | 5  | 141.69 | 5.15  |
| -8 | -4 | 5  | 181.04 | 4.54  |
| -8 | -4 | 6  | 619.75 | 11.70 |
| -8 | -4 | 6  | 706.41 | 11.02 |
| -8 | -4 | 6  | 628.25 | 9.57  |
| -8 | -4 | 6  | 701.11 | 12.07 |
| -8 | -4 | 6  | 686.72 | 8.62  |
| -8 | -4 | 6  | 725.64 | 11.33 |

## CIF 31

|    |    |    |        |       |
|----|----|----|--------|-------|
| -8 | -4 | 6  | 653.96 | 10.81 |
| -8 | -4 | 7  | 200.02 | 5.41  |
| -8 | -4 | 7  | 203.07 | 6.07  |
| -8 | -4 | 7  | 189.93 | 4.71  |
| -8 | -4 | 7  | 200.71 | 5.59  |
| -8 | -4 | 7  | 189.96 | 5.35  |
| -8 | -4 | 8  | 10.66  | 1.54  |
| -8 | -4 | 8  | 8.97   | 1.17  |
| -8 | -4 | 8  | 8.68   | 1.27  |
| -8 | -4 | 8  | 10.23  | 1.64  |
| -8 | -4 | 8  | 10.89  | 1.20  |
| -8 | -4 | 8  | 9.40   | 1.57  |
| -8 | -4 | 9  | 6.63   | 1.40  |
| -8 | -4 | 9  | 4.98   | 1.32  |
| -8 | -4 | 9  | 5.14   | 1.04  |
| -8 | -4 | 9  | 5.98   | 1.02  |
| -8 | -4 | 9  | 2.94   | 0.75  |
| -8 | -4 | 9  | 5.03   | 1.25  |
| -8 | -4 | 10 | 50.54  | 2.14  |
| -8 | -4 | 10 | 53.72  | 2.81  |
| -8 | -4 | 10 | 52.14  | 2.62  |
| -8 | -4 | 10 | 47.05  | 1.72  |
| -8 | -4 | 10 | 52.73  | 2.68  |
| -8 | -4 | 11 | 11.42  | 1.28  |
| -8 | -4 | 11 | 12.71  | 1.35  |
| -8 | -4 | 11 | 11.54  | 1.35  |
| -8 | -4 | 12 | 1.68   | 0.65  |
| -8 | -4 | 12 | 1.84   | 0.77  |
| -8 | -4 | 12 | 1.00   | 0.59  |
| -8 | -4 | 13 | 74.74  | 2.16  |
| -8 | -3 | -4 | 0.69   | 0.43  |
| -8 | -3 | -4 | 0.32   | 0.43  |
| -8 | -3 | -3 | 11.77  | 1.02  |
| -8 | -3 | -3 | 11.47  | 1.02  |
| -8 | -3 | -2 | 37.07  | 1.88  |
| -8 | -3 | -2 | 34.87  | 1.74  |
| -8 | -3 | -1 | 35.50  | 1.89  |
| -8 | -3 | 0  | 0.81   | 0.64  |
| -8 | -3 | 0  | 0.49   | 0.63  |
| -8 | -3 | 0  | 0.56   | 0.71  |
| -8 | -3 | 0  | 0.15   | 0.80  |

## CIF 31

|    |    |   |        |      |
|----|----|---|--------|------|
| -8 | -3 | 1 | 0.57   | 0.71 |
| -8 | -3 | 1 | 0.69   | 0.72 |
| -8 | -3 | 1 | 2.03   | 0.83 |
| -8 | -3 | 1 | 2.07   | 0.95 |
| -8 | -3 | 2 | 2.03   | 0.91 |
| -8 | -3 | 2 | 2.27   | 0.91 |
| -8 | -3 | 2 | 2.29   | 0.91 |
| -8 | -3 | 2 | 1.53   | 0.70 |
| -8 | -3 | 3 | 116.26 | 4.77 |
| -8 | -3 | 3 | 106.55 | 4.02 |
| -8 | -3 | 3 | 115.77 | 3.74 |
| -8 | -3 | 3 | 118.30 | 3.65 |
| -8 | -3 | 3 | 117.40 | 5.01 |
| -8 | -3 | 3 | 109.50 | 3.95 |
| -8 | -3 | 4 | 288.91 | 5.84 |
| -8 | -3 | 4 | 268.28 | 6.67 |
| -8 | -3 | 4 | 283.00 | 6.64 |
| -8 | -3 | 4 | 283.40 | 7.90 |
| -8 | -3 | 4 | 277.05 | 7.74 |
| -8 | -3 | 5 | 97.31  | 4.52 |
| -8 | -3 | 5 | 97.05  | 4.02 |
| -8 | -3 | 5 | 90.21  | 2.97 |
| -8 | -3 | 5 | 98.32  | 3.87 |
| -8 | -3 | 5 | 89.11  | 3.82 |
| -8 | -3 | 6 | 87.29  | 3.28 |
| -8 | -3 | 6 | 79.14  | 4.07 |
| -8 | -3 | 6 | 74.16  | 3.49 |
| -8 | -3 | 6 | 71.64  | 3.47 |
| -8 | -3 | 6 | 80.63  | 3.67 |
| -8 | -3 | 7 | 132.03 | 4.60 |
| -8 | -3 | 7 | 134.07 | 5.30 |
| -8 | -3 | 7 | 150.34 | 4.30 |
| -8 | -3 | 7 | 142.46 | 4.08 |
| -8 | -3 | 7 | 133.56 | 4.66 |
| -8 | -3 | 7 | 130.56 | 5.17 |
| -8 | -3 | 8 | 117.94 | 4.37 |
| -8 | -3 | 8 | 120.69 | 4.24 |
| -8 | -3 | 8 | 115.43 | 4.32 |
| -8 | -3 | 8 | 115.06 | 3.74 |
| -8 | -3 | 8 | 132.04 | 5.09 |
| -8 | -3 | 8 | 117.47 | 3.77 |



## CIF 31

|    |    |    |        |      |
|----|----|----|--------|------|
| -8 | -3 | 8  | 121.85 | 3.68 |
| -8 | -3 | 9  | 302.00 | 5.69 |
| -8 | -3 | 9  | 311.11 | 6.21 |
| -8 | -3 | 9  | 289.28 | 6.82 |
| -8 | -3 | 9  | 308.87 | 7.13 |
| -8 | -3 | 9  | 325.18 | 6.45 |
| -8 | -3 | 9  | 313.50 | 6.88 |
| -8 | -3 | 9  | 306.95 | 7.63 |
| -8 | -3 | 10 | 53.07  | 2.84 |
| -8 | -3 | 10 | 48.58  | 2.70 |
| -8 | -3 | 10 | 51.04  | 2.98 |
| -8 | -3 | 10 | 59.81  | 2.10 |
| -8 | -3 | 10 | 52.11  | 2.76 |
| -8 | -3 | 10 | 61.72  | 2.67 |
| -8 | -3 | 10 | 54.78  | 2.42 |
| -8 | -3 | 10 | 57.92  | 2.82 |
| -8 | -3 | 11 | 8.46   | 1.32 |
| -8 | -3 | 11 | 8.87   | 1.25 |
| -8 | -3 | 11 | 6.26   | 0.98 |
| -8 | -3 | 11 | 7.29   | 1.30 |
| -8 | -3 | 12 | 41.53  | 2.20 |
| -8 | -3 | 12 | 42.67  | 2.12 |
| -8 | -3 | 12 | 41.16  | 2.23 |
| -8 | -3 | 13 | 11.30  | 1.15 |
| -8 | -3 | 13 | 9.62   | 0.98 |
| -8 | -3 | 13 | 8.71   | 0.90 |
| -8 | -3 | 13 | 11.03  | 1.06 |
| -8 | -2 | -5 | 10.46  | 0.85 |
| -8 | -2 | -5 | 10.27  | 0.80 |
| -8 | -2 | -4 | 112.09 | 2.97 |
| -8 | -2 | -4 | 115.81 | 2.98 |
| -8 | -2 | -3 | 4.91   | 0.95 |
| -8 | -2 | -3 | 6.87   | 1.12 |
| -8 | -2 | -2 | 10.81  | 1.24 |
| -8 | -2 | -1 | 67.83  | 2.43 |
| -8 | -2 | -1 | 68.88  | 2.96 |
| -8 | -2 | -1 | 64.58  | 2.26 |
| -8 | -2 | -1 | 65.28  | 2.52 |
| -8 | -2 | -1 | 70.42  | 2.80 |
| -8 | -2 | 0  | 13.21  | 1.30 |
| -8 | -2 | 0  | 14.24  | 1.33 |

## CIF 31

|    |    |   |        |       |
|----|----|---|--------|-------|
| -8 | -2 | 0 | 13.29  | 1.38  |
| -8 | -2 | 0 | 12.73  | 1.40  |
| -8 | -2 | 0 | 13.50  | 1.46  |
| -8 | -2 | 1 | 86.94  | 3.23  |
| -8 | -2 | 1 | 86.38  | 3.12  |
| -8 | -2 | 1 | 84.62  | 3.33  |
| -8 | -2 | 1 | 78.19  | 2.93  |
| -8 | -2 | 2 | 5.33   | 0.94  |
| -8 | -2 | 2 | 4.27   | 1.03  |
| -8 | -2 | 2 | 4.17   | 1.45  |
| -8 | -2 | 2 | 5.58   | 1.07  |
| -8 | -2 | 2 | 4.07   | 1.07  |
| -8 | -2 | 2 | 4.04   | 1.58  |
| -8 | -2 | 3 | 18.15  | 1.79  |
| -8 | -2 | 3 | 14.31  | 1.58  |
| -8 | -2 | 3 | 22.06  | 1.76  |
| -8 | -2 | 3 | 17.04  | 2.13  |
| -8 | -2 | 3 | 23.86  | 1.88  |
| -8 | -2 | 3 | 18.49  | 2.37  |
| -8 | -2 | 4 | 457.74 | 7.69  |
| -8 | -2 | 4 | 444.16 | 10.08 |
| -8 | -2 | 4 | 480.91 | 10.64 |
| -8 | -2 | 4 | 448.37 | 8.56  |
| -8 | -2 | 4 | 435.22 | 8.63  |
| -8 | -2 | 4 | 501.26 | 8.66  |
| -8 | -2 | 4 | 460.91 | 8.94  |
| -8 | -2 | 5 | 86.35  | 2.89  |
| -8 | -2 | 5 | 98.27  | 4.72  |
| -8 | -2 | 5 | 81.96  | 3.66  |
| -8 | -2 | 5 | 90.47  | 4.41  |
| -8 | -2 | 5 | 90.53  | 3.85  |
| -8 | -2 | 5 | 91.13  | 3.37  |
| -8 | -2 | 6 | 283.14 | 6.98  |
| -8 | -2 | 6 | 268.60 | 6.81  |
| -8 | -2 | 6 | 286.20 | 6.30  |
| -8 | -2 | 6 | 269.24 | 7.69  |
| -8 | -2 | 6 | 290.58 | 6.77  |
| -8 | -2 | 6 | 302.63 | 6.45  |
| -8 | -2 | 6 | 272.65 | 6.03  |
| -8 | -2 | 7 | 54.75  | 2.65  |
| -8 | -2 | 7 | 45.55  | 2.89  |

## CIF 31

|    |    |    |        |      |
|----|----|----|--------|------|
| -8 | -2 | 7  | 50.73  | 2.69 |
| -8 | -2 | 7  | 54.83  | 2.99 |
| -8 | -2 | 7  | 48.45  | 2.56 |
| -8 | -2 | 7  | 51.80  | 3.37 |
| -8 | -2 | 7  | 40.22  | 2.93 |
| -8 | -2 | 7  | 45.30  | 2.74 |
| -8 | -2 | 8  | 13.55  | 1.79 |
| -8 | -2 | 8  | 13.34  | 1.60 |
| -8 | -2 | 8  | 11.54  | 1.50 |
| -8 | -2 | 8  | 10.86  | 1.90 |
| -8 | -2 | 8  | 14.50  | 1.60 |
| -8 | -2 | 8  | 12.14  | 1.46 |
| -8 | -2 | 8  | 12.19  | 1.35 |
| -8 | -2 | 9  | 31.43  | 2.14 |
| -8 | -2 | 9  | 30.94  | 2.32 |
| -8 | -2 | 9  | 30.05  | 1.81 |
| -8 | -2 | 9  | 24.57  | 2.25 |
| -8 | -2 | 9  | 32.03  | 2.29 |
| -8 | -2 | 9  | 30.20  | 2.37 |
| -8 | -2 | 9  | 31.85  | 2.20 |
| -8 | -2 | 10 | 72.52  | 3.38 |
| -8 | -2 | 10 | 72.09  | 3.30 |
| -8 | -2 | 10 | 71.36  | 3.21 |
| -8 | -2 | 10 | 64.07  | 3.32 |
| -8 | -2 | 10 | 67.47  | 3.59 |
| -8 | -2 | 10 | 79.03  | 3.28 |
| -8 | -2 | 10 | 69.85  | 2.38 |
| -8 | -2 | 10 | 76.15  | 3.18 |
| -8 | -2 | 11 | 102.16 | 3.90 |
| -8 | -2 | 11 | 113.20 | 3.73 |
| -8 | -2 | 11 | 104.25 | 3.93 |
| -8 | -2 | 11 | 105.44 | 4.20 |
| -8 | -2 | 11 | 100.49 | 3.74 |
| -8 | -2 | 11 | 111.22 | 3.82 |
| -8 | -2 | 12 | 3.81   | 1.16 |
| -8 | -2 | 12 | 4.24   | 1.03 |
| -8 | -2 | 12 | 2.90   | 1.05 |
| -8 | -2 | 13 | 17.39  | 1.47 |
| -8 | -2 | 13 | 18.79  | 1.44 |
| -8 | -2 | 13 | 18.14  | 1.47 |
| -8 | -2 | 14 | 61.99  | 2.08 |

## CIF 31

|    |    |    |         |       |
|----|----|----|---------|-------|
| -8 | -2 | 14 | 64.19   | 2.00  |
| -8 | -1 | -6 | 71.51   | 1.85  |
| -8 | -1 | -5 | 112.50  | 3.04  |
| -8 | -1 | -5 | 110.09  | 2.93  |
| -8 | -1 | -4 | 111.22  | 3.36  |
| -8 | -1 | -4 | 106.04  | 3.31  |
| -8 | -1 | -3 | 20.47   | 1.36  |
| -8 | -1 | -3 | 19.37   | 1.42  |
| -8 | -1 | -3 | 23.10   | 1.79  |
| -8 | -1 | -3 | 20.68   | 1.70  |
| -8 | -1 | -2 | 98.71   | 3.24  |
| -8 | -1 | -2 | 101.52  | 3.21  |
| -8 | -1 | -2 | 100.01  | 3.54  |
| -8 | -1 | -2 | 103.45  | 3.26  |
| -8 | -1 | -1 | 20.92   | 1.67  |
| -8 | -1 | -1 | 18.42   | 1.42  |
| -8 | -1 | -1 | 22.08   | 1.75  |
| -8 | -1 | -1 | 20.31   | 1.59  |
| -8 | -1 | -1 | 20.67   | 1.85  |
| -8 | -1 | -1 | 19.71   | 1.65  |
| -8 | -1 | 0  | 41.70   | 2.19  |
| -8 | -1 | 0  | 39.91   | 2.31  |
| -8 | -1 | 0  | 40.31   | 2.18  |
| -8 | -1 | 0  | 38.67   | 2.22  |
| -8 | -1 | 0  | 42.07   | 2.32  |
| -8 | -1 | 0  | 42.60   | 2.44  |
| -8 | -1 | 1  | 122.66  | 5.11  |
| -8 | -1 | 1  | 124.51  | 3.91  |
| -8 | -1 | 1  | 122.80  | 4.06  |
| -8 | -1 | 1  | 122.46  | 3.70  |
| -8 | -1 | 1  | 130.60  | 4.86  |
| -8 | -1 | 1  | 116.77  | 4.70  |
| -8 | -1 | 1  | 127.39  | 3.82  |
| -8 | -1 | 2  | 498.85  | 8.58  |
| -8 | -1 | 2  | 522.38  | 10.38 |
| -8 | -1 | 2  | 485.20  | 10.14 |
| -8 | -1 | 2  | 492.18  | 10.58 |
| -8 | -1 | 2  | 500.96  | 8.25  |
| -8 | -1 | 2  | 496.21  | 8.53  |
| -8 | -1 | 3  | 1073.91 | 16.70 |
| -8 | -1 | 3  | 1061.62 | 13.94 |

## CIF 31

|    |    |   |         |       |
|----|----|---|---------|-------|
| -8 | -1 | 3 | 1099.86 | 16.28 |
| -8 | -1 | 3 | 1004.90 | 15.90 |
| -8 | -1 | 3 | 1009.67 | 13.31 |
| -8 | -1 | 3 | 1010.75 | 13.23 |
| -8 | -1 | 4 | 452.79  | 8.19  |
| -8 | -1 | 4 | 479.50  | 8.46  |
| -8 | -1 | 4 | 407.46  | 8.27  |
| -8 | -1 | 4 | 429.38  | 8.33  |
| -8 | -1 | 4 | 445.90  | 9.91  |
| -8 | -1 | 4 | 445.86  | 8.51  |
| -8 | -1 | 4 | 479.46  | 10.11 |
| -8 | -1 | 4 | 428.09  | 7.32  |
| -8 | -1 | 4 | 460.06  | 10.28 |
| -8 | -1 | 5 | 288.96  | 7.65  |
| -8 | -1 | 5 | 299.41  | 6.96  |
| -8 | -1 | 5 | 282.66  | 6.75  |
| -8 | -1 | 5 | 322.76  | 8.58  |
| -8 | -1 | 5 | 328.98  | 8.22  |
| -8 | -1 | 5 | 315.07  | 6.75  |
| -8 | -1 | 5 | 313.73  | 6.88  |
| -8 | -1 | 5 | 308.58  | 8.19  |
| -8 | -1 | 5 | 303.18  | 6.59  |
| -8 | -1 | 6 | 129.58  | 4.12  |
| -8 | -1 | 6 | 120.76  | 5.02  |
| -8 | -1 | 6 | 118.57  | 4.83  |
| -8 | -1 | 6 | 121.98  | 4.22  |
| -8 | -1 | 6 | 106.47  | 4.67  |
| -8 | -1 | 6 | 124.96  | 4.43  |
| -8 | -1 | 6 | 122.00  | 4.21  |
| -8 | -1 | 6 | 120.40  | 5.14  |
| -8 | -1 | 6 | 119.98  | 4.11  |
| -8 | -1 | 6 | 110.02  | 4.13  |
| -8 | -1 | 6 | 124.77  | 4.97  |
| -8 | -1 | 7 | 54.39   | 3.31  |
| -8 | -1 | 7 | 45.14   | 2.44  |
| -8 | -1 | 7 | 45.90   | 2.66  |
| -8 | -1 | 7 | 57.37   | 3.61  |
| -8 | -1 | 7 | 44.28   | 2.70  |
| -8 | -1 | 7 | 54.76   | 3.01  |
| -8 | -1 | 7 | 47.35   | 3.35  |
| -8 | -1 | 7 | 49.10   | 2.77  |

## CIF 31

|    |    |    |        |       |
|----|----|----|--------|-------|
| -8 | -1 | 7  | 56.45  | 3.07  |
| -8 | -1 | 7  | 47.58  | 3.09  |
| -8 | -1 | 7  | 49.76  | 3.17  |
| -8 | -1 | 8  | 562.93 | 10.89 |
| -8 | -1 | 8  | 577.99 | 8.98  |
| -8 | -1 | 8  | 523.64 | 10.80 |
| -8 | -1 | 8  | 529.44 | 10.05 |
| -8 | -1 | 8  | 496.60 | 10.13 |
| -8 | -1 | 8  | 575.55 | 10.07 |
| -8 | -1 | 8  | 581.18 | 11.55 |
| -8 | -1 | 8  | 571.78 | 9.97  |
| -8 | -1 | 8  | 528.72 | 9.67  |
| -8 | -1 | 8  | 537.52 | 10.00 |
| -8 | -1 | 9  | 103.84 | 4.21  |
| -8 | -1 | 9  | 107.15 | 4.08  |
| -8 | -1 | 9  | 106.31 | 4.04  |
| -8 | -1 | 9  | 106.42 | 3.31  |
| -8 | -1 | 9  | 103.31 | 4.06  |
| -8 | -1 | 9  | 97.17  | 3.97  |
| -8 | -1 | 9  | 89.08  | 4.14  |
| -8 | -1 | 9  | 112.54 | 4.85  |
| -8 | -1 | 9  | 104.53 | 4.19  |
| -8 | -1 | 9  | 101.61 | 3.96  |
| -8 | -1 | 10 | 13.65  | 1.57  |
| -8 | -1 | 10 | 12.12  | 1.73  |
| -8 | -1 | 10 | 14.30  | 1.63  |
| -8 | -1 | 10 | 11.50  | 1.59  |
| -8 | -1 | 10 | 12.00  | 1.57  |
| -8 | -1 | 10 | 12.64  | 1.74  |
| -8 | -1 | 10 | 12.43  | 1.65  |
| -8 | -1 | 10 | 14.52  | 1.71  |
| -8 | -1 | 11 | 5.90   | 1.29  |
| -8 | -1 | 11 | 7.25   | 1.31  |
| -8 | -1 | 11 | 6.88   | 1.37  |
| -8 | -1 | 11 | 8.51   | 1.52  |
| -8 | -1 | 11 | 6.11   | 1.15  |
| -8 | -1 | 11 | 6.77   | 1.18  |
| -8 | -1 | 11 | 6.93   | 1.27  |
| -8 | -1 | 12 | 63.48  | 2.79  |
| -8 | -1 | 12 | 60.68  | 2.87  |
| -8 | -1 | 12 | 56.10  | 2.81  |

## CIF 31

|    |    |    |        |      |
|----|----|----|--------|------|
| -8 | -1 | 12 | 60.92  | 3.13 |
| -8 | -1 | 12 | 57.10  | 2.86 |
| -8 | -1 | 12 | 58.98  | 2.75 |
| -8 | -1 | 12 | 63.00  | 2.76 |
| -8 | -1 | 13 | 33.73  | 1.97 |
| -8 | -1 | 13 | 33.06  | 2.09 |
| -8 | -1 | 13 | 34.58  | 1.93 |
| -8 | -1 | 13 | 35.43  | 2.08 |
| -8 | -1 | 14 | 51.86  | 2.02 |
| -8 | -1 | 14 | 58.75  | 2.18 |
| -8 | -1 | 14 | 53.43  | 1.94 |
| -8 | 0  | -7 | 18.70  | 0.88 |
| -8 | 0  | -6 | 2.92   | 0.79 |
| -8 | 0  | -5 | 37.54  | 2.00 |
| -8 | 0  | -5 | 35.86  | 1.81 |
| -8 | 0  | -5 | 35.34  | 1.70 |
| -8 | 0  | -5 | 34.86  | 1.99 |
| -8 | 0  | -4 | 41.50  | 2.29 |
| -8 | 0  | -4 | 40.02  | 2.12 |
| -8 | 0  | -4 | 39.64  | 2.25 |
| -8 | 0  | -3 | 1.12   | 1.05 |
| -8 | 0  | -3 | 1.27   | 0.91 |
| -8 | 0  | -3 | 0.70   | 0.87 |
| -8 | 0  | -3 | 2.14   | 0.91 |
| -8 | 0  | -2 | 128.09 | 4.19 |
| -8 | 0  | -2 | 128.70 | 4.06 |
| -8 | 0  | -2 | 126.12 | 4.03 |
| -8 | 0  | -2 | 120.02 | 3.92 |
| -8 | 0  | -2 | 133.53 | 4.02 |
| -8 | 0  | -1 | 2.92   | 1.12 |
| -8 | 0  | -1 | 0.65   | 0.91 |
| -8 | 0  | -1 | 3.55   | 1.14 |
| -8 | 0  | -1 | 2.00   | 1.00 |
| -8 | 0  | -1 | 3.50   | 1.01 |
| -8 | 0  | -1 | 1.50   | 0.95 |
| -8 | 0  | 0  | 0.93   | 0.79 |
| -8 | 0  | 0  | 0.68   | 0.92 |
| -8 | 0  | 0  | 0.81   | 0.84 |
| -8 | 0  | 0  | 1.88   | 1.22 |
| -8 | 0  | 0  | 1.04   | 0.92 |
| -8 | 0  | 0  | 0.31   | 0.90 |

## CIF 31

|    |   |   |        |       |
|----|---|---|--------|-------|
| -8 | 0 | 0 | 0.45   | 1.14  |
| -8 | 0 | 1 | 129.54 | 4.01  |
| -8 | 0 | 1 | 124.54 | 4.05  |
| -8 | 0 | 1 | 141.68 | 5.33  |
| -8 | 0 | 1 | 116.55 | 3.98  |
| -8 | 0 | 1 | 140.01 | 4.95  |
| -8 | 0 | 1 | 140.39 | 5.13  |
| -8 | 0 | 1 | 125.65 | 3.71  |
| -8 | 0 | 2 | 123.48 | 4.81  |
| -8 | 0 | 2 | 140.72 | 4.33  |
| -8 | 0 | 2 | 141.67 | 5.25  |
| -8 | 0 | 2 | 125.06 | 5.16  |
| -8 | 0 | 2 | 145.80 | 4.30  |
| -8 | 0 | 2 | 145.37 | 4.20  |
| -8 | 0 | 3 | 245.22 | 5.38  |
| -8 | 0 | 3 | 267.69 | 7.43  |
| -8 | 0 | 3 | 269.44 | 7.52  |
| -8 | 0 | 3 | 254.32 | 7.02  |
| -8 | 0 | 3 | 253.38 | 7.63  |
| -8 | 0 | 3 | 266.56 | 5.99  |
| -8 | 0 | 4 | 237.60 | 7.26  |
| -8 | 0 | 4 | 238.62 | 5.71  |
| -8 | 0 | 4 | 250.98 | 7.00  |
| -8 | 0 | 4 | 234.42 | 6.57  |
| -8 | 0 | 5 | 762.68 | 13.62 |
| -8 | 0 | 5 | 765.18 | 12.91 |
| -8 | 0 | 5 | 723.71 | 11.22 |
| -8 | 0 | 5 | 761.56 | 11.88 |
| -8 | 0 | 5 | 768.92 | 11.69 |
| -8 | 0 | 5 | 756.11 | 11.30 |
| -8 | 0 | 5 | 744.17 | 13.10 |
| -8 | 0 | 5 | 731.78 | 11.35 |
| -8 | 0 | 5 | 757.84 | 13.20 |
| -8 | 0 | 6 | 80.95  | 3.97  |
| -8 | 0 | 6 | 80.15  | 3.30  |
| -8 | 0 | 6 | 73.37  | 4.05  |
| -8 | 0 | 6 | 80.39  | 4.06  |
| -8 | 0 | 6 | 97.67  | 3.86  |
| -8 | 0 | 6 | 77.04  | 3.36  |
| -8 | 0 | 6 | 74.46  | 3.37  |
| -8 | 0 | 6 | 75.03  | 4.19  |



CIF 31

|    |   |    |        |       |
|----|---|----|--------|-------|
| -8 | 0 | 6  | 90.29  | 3.72  |
| -8 | 0 | 6  | 87.03  | 4.11  |
| -8 | 0 | 6  | 92.67  | 3.46  |
| -8 | 0 | 7  | 866.91 | 12.25 |
| -8 | 0 | 7  | 894.17 | 13.50 |
| -8 | 0 | 7  | 885.17 | 14.84 |
| -8 | 0 | 7  | 927.35 | 15.42 |
| -8 | 0 | 7  | 846.18 | 14.21 |
| -8 | 0 | 7  | 907.29 | 14.33 |
| -8 | 0 | 7  | 926.19 | 13.04 |
| -8 | 0 | 7  | 905.33 | 13.44 |
| -8 | 0 | 7  | 921.63 | 13.53 |
| -8 | 0 | 7  | 850.82 | 12.97 |
| -8 | 0 | 7  | 914.84 | 13.53 |
| -8 | 0 | 8  | 766.34 | 11.78 |
| -8 | 0 | 8  | 692.01 | 13.17 |
| -8 | 0 | 8  | 801.53 | 12.49 |
| -8 | 0 | 8  | 720.53 | 12.82 |
| -8 | 0 | 8  | 774.05 | 10.90 |
| -8 | 0 | 8  | 757.27 | 13.05 |
| -8 | 0 | 8  | 829.08 | 12.67 |
| -8 | 0 | 8  | 745.51 | 12.26 |
| -8 | 0 | 8  | 721.36 | 12.02 |
| -8 | 0 | 8  | 738.63 | 10.80 |
| -8 | 0 | 8  | 767.61 | 12.51 |
| -8 | 0 | 8  | 694.37 | 12.75 |
| -8 | 0 | 8  | 732.69 | 11.85 |
| -8 | 0 | 9  | 340.61 | 8.45  |
| -8 | 0 | 9  | 347.24 | 7.48  |
| -8 | 0 | 9  | 337.56 | 7.52  |
| -8 | 0 | 9  | 321.76 | 6.59  |
| -8 | 0 | 9  | 334.82 | 8.19  |
| -8 | 0 | 9  | 321.88 | 7.22  |
| -8 | 0 | 9  | 339.34 | 8.15  |
| -8 | 0 | 9  | 334.51 | 7.52  |
| -8 | 0 | 9  | 378.66 | 8.12  |
| -8 | 0 | 9  | 344.64 | 7.72  |
| -8 | 0 | 9  | 301.32 | 7.17  |
| -8 | 0 | 9  | 331.31 | 7.91  |
| -8 | 0 | 10 | 402.28 | 8.53  |
| -8 | 0 | 10 | 415.79 | 8.13  |

## CIF 31

|    |   |    |        |      |
|----|---|----|--------|------|
| -8 | 0 | 10 | 403.74 | 8.24 |
| -8 | 0 | 10 | 377.04 | 8.09 |
| -8 | 0 | 10 | 377.85 | 7.99 |
| -8 | 0 | 10 | 398.71 | 7.33 |
| -8 | 0 | 10 | 380.54 | 8.62 |
| -8 | 0 | 10 | 413.50 | 7.45 |
| -8 | 0 | 10 | 396.95 | 8.38 |
| -8 | 0 | 11 | 5.31   | 1.38 |
| -8 | 0 | 11 | 5.58   | 0.98 |
| -8 | 0 | 11 | 5.80   | 1.23 |
| -8 | 0 | 11 | 5.96   | 1.29 |
| -8 | 0 | 11 | 3.06   | 1.10 |
| -8 | 0 | 11 | 5.01   | 1.01 |
| -8 | 0 | 11 | 5.23   | 1.10 |
| -8 | 0 | 11 | 4.69   | 1.14 |
| -8 | 0 | 12 | 46.23  | 2.62 |
| -8 | 0 | 12 | 48.17  | 2.72 |
| -8 | 0 | 12 | 45.07  | 2.44 |
| -8 | 0 | 12 | 48.03  | 2.42 |
| -8 | 0 | 12 | 40.04  | 2.51 |
| -8 | 0 | 12 | 46.52  | 2.64 |
| -8 | 0 | 12 | 43.75  | 2.10 |
| -8 | 0 | 12 | 47.51  | 2.50 |
| -8 | 0 | 13 | 8.11   | 1.14 |
| -8 | 0 | 13 | 8.87   | 1.13 |
| -8 | 0 | 13 | 8.71   | 1.24 |
| -8 | 0 | 13 | 10.24  | 1.35 |
| -8 | 0 | 14 | 1.33   | 0.72 |
| -8 | 0 | 14 | 2.16   | 0.66 |
| -8 | 0 | 14 | 2.30   | 0.76 |
| -8 | 1 | -7 | 375.13 | 5.53 |
| -8 | 1 | -7 | 387.11 | 5.80 |
| -8 | 1 | -6 | 51.16  | 2.20 |
| -8 | 1 | -6 | 49.21  | 2.02 |
| -8 | 1 | -6 | 51.93  | 2.21 |
| -8 | 1 | -5 | 102.37 | 3.53 |
| -8 | 1 | -5 | 110.11 | 3.59 |
| -8 | 1 | -5 | 100.97 | 3.39 |
| -8 | 1 | -5 | 110.88 | 3.56 |
| -8 | 1 | -4 | 17.23  | 1.73 |
| -8 | 1 | -4 | 17.59  | 1.68 |

## CIF 31

|    |   |    |         |       |
|----|---|----|---------|-------|
| -8 | 1 | -4 | 15.20   | 1.62  |
| -8 | 1 | -4 | 16.69   | 1.56  |
| -8 | 1 | -3 | 144.46  | 4.24  |
| -8 | 1 | -3 | 146.26  | 4.41  |
| -8 | 1 | -3 | 150.72  | 4.53  |
| -8 | 1 | -3 | 146.00  | 4.41  |
| -8 | 1 | -2 | 283.53  | 6.51  |
| -8 | 1 | -2 | 279.29  | 6.40  |
| -8 | 1 | -2 | 283.42  | 6.55  |
| -8 | 1 | -2 | 277.36  | 6.26  |
| -8 | 1 | -2 | 272.07  | 6.20  |
| -8 | 1 | -2 | 291.08  | 6.46  |
| -8 | 1 | -1 | 184.01  | 5.10  |
| -8 | 1 | -1 | 183.53  | 5.17  |
| -8 | 1 | -1 | 178.03  | 5.50  |
| -8 | 1 | -1 | 182.02  | 5.07  |
| -8 | 1 | -1 | 185.51  | 5.09  |
| -8 | 1 | -1 | 184.32  | 4.90  |
| -8 | 1 | 0  | 572.27  | 9.60  |
| -8 | 1 | 0  | 550.74  | 9.31  |
| -8 | 1 | 0  | 550.27  | 9.38  |
| -8 | 1 | 0  | 542.15  | 8.85  |
| -8 | 1 | 0  | 542.39  | 10.32 |
| -8 | 1 | 0  | 531.00  | 8.71  |
| -8 | 1 | 0  | 572.95  | 10.68 |
| -8 | 1 | 1  | 1181.98 | 14.80 |
| -8 | 1 | 1  | 1136.82 | 17.73 |
| -8 | 1 | 1  | 1143.13 | 14.68 |
| -8 | 1 | 1  | 1167.97 | 15.98 |
| -8 | 1 | 1  | 1143.46 | 13.91 |
| -8 | 1 | 1  | 1178.12 | 16.89 |
| -8 | 1 | 1  | 1145.57 | 15.12 |
| -8 | 1 | 2  | 5.51    | 1.54  |
| -8 | 1 | 2  | 5.58    | 1.73  |
| -8 | 1 | 2  | 7.24    | 1.41  |
| -8 | 1 | 2  | 8.47    | 1.63  |
| -8 | 1 | 2  | 4.20    | 0.98  |
| -8 | 1 | 2  | 6.01    | 1.58  |
| -8 | 1 | 2  | 5.09    | 1.14  |
| -8 | 1 | 3  | 233.13  | 7.25  |
| -8 | 1 | 3  | 262.84  | 5.93  |

CIF 31

|    |   |   |        |       |
|----|---|---|--------|-------|
| -8 | 1 | 3 | 247.43 | 5.18  |
| -8 | 1 | 3 | 262.10 | 7.28  |
| -8 | 1 | 3 | 243.32 | 6.56  |
| -8 | 1 | 3 | 233.65 | 6.32  |
| -8 | 1 | 4 | 684.42 | 13.00 |
| -8 | 1 | 4 | 673.11 | 13.98 |
| -8 | 1 | 4 | 732.24 | 11.33 |
| -8 | 1 | 4 | 694.91 | 9.87  |
| -8 | 1 | 4 | 723.43 | 12.22 |
| -8 | 1 | 4 | 659.73 | 11.58 |
| -8 | 1 | 5 | 561.61 | 11.45 |
| -8 | 1 | 5 | 561.90 | 10.53 |
| -8 | 1 | 5 | 566.02 | 9.26  |
| -8 | 1 | 5 | 538.52 | 11.60 |
| -8 | 1 | 5 | 549.78 | 10.94 |
| -8 | 1 | 5 | 550.18 | 9.70  |
| -8 | 1 | 5 | 561.06 | 9.96  |
| -8 | 1 | 5 | 550.27 | 8.67  |
| -8 | 1 | 6 | 93.84  | 4.45  |
| -8 | 1 | 6 | 92.78  | 3.80  |
| -8 | 1 | 6 | 94.61  | 3.95  |
| -8 | 1 | 6 | 84.14  | 3.48  |
| -8 | 1 | 6 | 94.51  | 4.27  |
| -8 | 1 | 6 | 82.92  | 3.32  |
| -8 | 1 | 6 | 73.38  | 4.18  |
| -8 | 1 | 6 | 89.28  | 4.02  |
| -8 | 1 | 6 | 82.92  | 3.88  |
| -8 | 1 | 6 | 90.35  | 3.39  |
| -8 | 1 | 6 | 81.21  | 4.28  |
| -8 | 1 | 6 | 80.61  | 3.36  |
| -8 | 1 | 7 | 97.48  | 3.75  |
| -8 | 1 | 7 | 93.33  | 4.22  |
| -8 | 1 | 7 | 105.52 | 4.51  |
| -8 | 1 | 7 | 98.86  | 3.86  |
| -8 | 1 | 7 | 86.10  | 3.78  |
| -8 | 1 | 7 | 97.13  | 3.54  |
| -8 | 1 | 7 | 86.39  | 3.77  |
| -8 | 1 | 7 | 89.34  | 3.34  |
| -8 | 1 | 7 | 87.04  | 3.33  |
| -8 | 1 | 7 | 95.49  | 4.27  |
| -8 | 1 | 7 | 95.60  | 4.64  |

CIF 31

|    |   |    |        |      |
|----|---|----|--------|------|
| -8 | 1 | 7  | 105.50 | 4.85 |
| -8 | 1 | 7  | 99.80  | 4.60 |
| -8 | 1 | 7  | 98.11  | 3.83 |
| -8 | 1 | 7  | 93.55  | 4.14 |
| -8 | 1 | 7  | 100.69 | 5.35 |
| -8 | 1 | 8  | 17.09  | 1.85 |
| -8 | 1 | 8  | 14.84  | 1.60 |
| -8 | 1 | 8  | 13.93  | 1.77 |
| -8 | 1 | 8  | 15.86  | 1.98 |
| -8 | 1 | 8  | 16.13  | 1.81 |
| -8 | 1 | 8  | 10.79  | 1.93 |
| -8 | 1 | 8  | 18.45  | 1.68 |
| -8 | 1 | 8  | 11.61  | 1.74 |
| -8 | 1 | 8  | 14.44  | 1.96 |
| -8 | 1 | 8  | 11.29  | 1.85 |
| -8 | 1 | 8  | 23.37  | 2.34 |
| -8 | 1 | 8  | 14.78  | 1.73 |
| -8 | 1 | 8  | 15.74  | 1.68 |
| -8 | 1 | 9  | 71.64  | 3.47 |
| -8 | 1 | 9  | 71.88  | 3.44 |
| -8 | 1 | 9  | 67.06  | 3.64 |
| -8 | 1 | 9  | 65.83  | 3.63 |
| -8 | 1 | 9  | 68.39  | 3.50 |
| -8 | 1 | 9  | 65.72  | 3.81 |
| -8 | 1 | 9  | 70.03  | 3.19 |
| -8 | 1 | 9  | 74.77  | 3.49 |
| -8 | 1 | 9  | 75.45  | 3.79 |
| -8 | 1 | 9  | 70.75  | 3.32 |
| -8 | 1 | 9  | 78.45  | 3.28 |
| -8 | 1 | 9  | 63.34  | 3.56 |
| -8 | 1 | 9  | 72.42  | 3.24 |
| -8 | 1 | 10 | 250.71 | 7.04 |
| -8 | 1 | 10 | 274.00 | 6.26 |
| -8 | 1 | 10 | 251.68 | 6.45 |
| -8 | 1 | 10 | 261.64 | 6.61 |
| -8 | 1 | 10 | 245.67 | 6.71 |
| -8 | 1 | 10 | 270.54 | 6.32 |
| -8 | 1 | 10 | 272.12 | 6.58 |
| -8 | 1 | 10 | 260.36 | 6.99 |
| -8 | 1 | 10 | 276.90 | 6.80 |
| -8 | 1 | 10 | 246.58 | 6.97 |

## CIF 31

|    |   |    |        |       |
|----|---|----|--------|-------|
| -8 | 1 | 10 | 240.73 | 6.57  |
| -8 | 1 | 10 | 255.76 | 6.35  |
| -8 | 1 | 11 | -0.15  | 0.89  |
| -8 | 1 | 11 | 1.49   | 1.25  |
| -8 | 1 | 11 | 0.37   | 0.96  |
| -8 | 1 | 11 | 1.63   | 0.86  |
| -8 | 1 | 11 | 1.08   | 0.85  |
| -8 | 1 | 11 | 0.31   | 0.89  |
| -8 | 1 | 11 | -0.09  | 1.04  |
| -8 | 1 | 11 | 1.33   | 1.00  |
| -8 | 1 | 11 | 1.23   | 0.87  |
| -8 | 1 | 11 | 1.42   | 0.92  |
| -8 | 1 | 11 | -0.04  | 0.85  |
| -8 | 1 | 12 | 733.76 | 10.57 |
| -8 | 1 | 12 | 680.66 | 10.64 |
| -8 | 1 | 12 | 661.68 | 10.53 |
| -8 | 1 | 12 | 724.62 | 11.14 |
| -8 | 1 | 12 | 769.17 | 10.67 |
| -8 | 1 | 12 | 771.64 | 11.48 |
| -8 | 1 | 12 | 737.02 | 10.66 |
| -8 | 1 | 13 | 60.46  | 2.44  |
| -8 | 1 | 13 | 56.59  | 2.57  |
| -8 | 1 | 13 | 53.00  | 2.62  |
| -8 | 1 | 14 | 18.46  | 1.35  |
| -8 | 1 | 14 | 20.01  | 1.19  |
| -8 | 1 | 14 | 20.90  | 1.39  |
| -8 | 2 | -8 | 27.81  | 2.55  |
| -8 | 2 | -7 | 41.18  | 2.01  |
| -8 | 2 | -7 | 38.44  | 1.81  |
| -8 | 2 | -7 | 39.03  | 1.83  |
| -8 | 2 | -6 | 3.24   | 1.01  |
| -8 | 2 | -6 | 2.90   | 1.03  |
| -8 | 2 | -6 | 3.33   | 1.12  |
| -8 | 2 | -6 | 1.60   | 0.77  |
| -8 | 2 | -6 | 3.47   | 1.05  |
| -8 | 2 | -5 | 203.21 | 4.48  |
| -8 | 2 | -5 | 217.86 | 5.31  |
| -8 | 2 | -5 | 218.07 | 5.40  |
| -8 | 2 | -5 | 220.29 | 5.38  |
| -8 | 2 | -5 | 214.50 | 5.28  |
| -8 | 2 | -4 | 114.11 | 4.02  |

## CIF 31

|    |   |    |        |       |
|----|---|----|--------|-------|
| -8 | 2 | -4 | 111.14 | 3.73  |
| -8 | 2 | -4 | 108.36 | 3.83  |
| -8 | 2 | -4 | 106.36 | 3.86  |
| -8 | 2 | -3 | 2.77   | 1.13  |
| -8 | 2 | -3 | 1.51   | 0.97  |
| -8 | 2 | -3 | 2.71   | 1.21  |
| -8 | 2 | -3 | 2.26   | 1.17  |
| -8 | 2 | -3 | 3.02   | 1.09  |
| -8 | 2 | -2 | 157.97 | 4.72  |
| -8 | 2 | -2 | 152.50 | 4.66  |
| -8 | 2 | -2 | 149.27 | 4.50  |
| -8 | 2 | -2 | 158.50 | 4.84  |
| -8 | 2 | -2 | 160.17 | 4.82  |
| -8 | 2 | -2 | 141.46 | 4.73  |
| -8 | 2 | -1 | 421.03 | 8.12  |
| -8 | 2 | -1 | 399.99 | 8.08  |
| -8 | 2 | -1 | 423.36 | 7.72  |
| -8 | 2 | -1 | 426.47 | 8.22  |
| -8 | 2 | -1 | 439.71 | 9.19  |
| -8 | 2 | -1 | 406.91 | 7.91  |
| -8 | 2 | 0  | 1.54   | 0.82  |
| -8 | 2 | 0  | 1.50   | 1.04  |
| -8 | 2 | 0  | 1.60   | 1.19  |
| -8 | 2 | 0  | 1.02   | 1.02  |
| -8 | 2 | 0  | 1.97   | 1.35  |
| -8 | 2 | 0  | 1.46   | 0.88  |
| -8 | 2 | 1  | 68.87  | 3.37  |
| -8 | 2 | 1  | 58.75  | 2.67  |
| -8 | 2 | 1  | 62.29  | 3.59  |
| -8 | 2 | 1  | 64.41  | 3.72  |
| -8 | 2 | 1  | 66.73  | 3.72  |
| -8 | 2 | 2  | 793.24 | 10.75 |
| -8 | 2 | 2  | 826.23 | 13.71 |
| -8 | 2 | 2  | 806.91 | 13.96 |
| -8 | 2 | 2  | 762.16 | 14.02 |
| -8 | 2 | 2  | 738.39 | 14.39 |
| -8 | 2 | 2  | 743.78 | 11.68 |
| -8 | 2 | 2  | 784.90 | 11.39 |
| -8 | 2 | 2  | 800.39 | 12.05 |
| -8 | 2 | 2  | 787.00 | 13.72 |
| -8 | 2 | 3  | 136.89 | 5.88  |

## CIF 31

|    |   |   |         |       |
|----|---|---|---------|-------|
| -8 | 2 | 3 | 136.88  | 4.56  |
| -8 | 2 | 3 | 142.21  | 4.26  |
| -8 | 2 | 3 | 141.63  | 4.70  |
| -8 | 2 | 3 | 141.70  | 4.05  |
| -8 | 2 | 3 | 138.31  | 5.42  |
| -8 | 2 | 3 | 143.89  | 5.33  |
| -8 | 2 | 3 | 135.94  | 5.34  |
| -8 | 2 | 3 | 144.65  | 5.71  |
| -8 | 2 | 4 | 125.78  | 5.02  |
| -8 | 2 | 4 | 140.47  | 4.65  |
| -8 | 2 | 4 | 147.13  | 4.32  |
| -8 | 2 | 4 | 151.04  | 5.63  |
| -8 | 2 | 4 | 126.13  | 5.75  |
| -8 | 2 | 4 | 151.51  | 4.75  |
| -8 | 2 | 4 | 148.81  | 4.25  |
| -8 | 2 | 5 | 0.52    | 0.92  |
| -8 | 2 | 5 | 1.75    | 1.05  |
| -8 | 2 | 5 | 1.56    | 0.82  |
| -8 | 2 | 5 | 0.97    | 1.37  |
| -8 | 2 | 5 | 3.06    | 1.32  |
| -8 | 2 | 5 | 0.28    | 0.97  |
| -8 | 2 | 5 | 1.73    | 1.13  |
| -8 | 2 | 5 | 2.42    | 1.76  |
| -8 | 2 | 5 | 0.68    | 1.23  |
| -8 | 2 | 6 | 1865.15 | 25.07 |
| -8 | 2 | 6 | 2034.38 | 22.41 |
| -8 | 2 | 6 | 2137.58 | 25.80 |
| -8 | 2 | 6 | 2030.46 | 24.81 |
| -8 | 2 | 6 | 1956.47 | 23.84 |
| -8 | 2 | 6 | 1869.50 | 22.11 |
| -8 | 2 | 6 | 2152.74 | 25.33 |
| -8 | 2 | 6 | 1953.14 | 23.82 |
| -8 | 2 | 6 | 1927.23 | 23.28 |
| -8 | 2 | 7 | 261.60  | 6.15  |
| -8 | 2 | 7 | 258.00  | 6.88  |
| -8 | 2 | 7 | 251.65  | 7.17  |
| -8 | 2 | 7 | 267.04  | 7.02  |
| -8 | 2 | 7 | 251.30  | 6.06  |
| -8 | 2 | 7 | 249.16  | 5.85  |
| -8 | 2 | 7 | 259.28  | 6.93  |
| -8 | 2 | 7 | 265.97  | 6.40  |



CIF 31

|    |   |    |        |      |
|----|---|----|--------|------|
| -8 | 2 | 7  | 249.17 | 6.87 |
| -8 | 2 | 7  | 249.78 | 8.36 |
| -8 | 2 | 7  | 253.78 | 7.60 |
| -8 | 2 | 7  | 239.64 | 7.31 |
| -8 | 2 | 7  | 276.98 | 7.74 |
| -8 | 2 | 7  | 272.35 | 6.64 |
| -8 | 2 | 8  | 36.95  | 2.99 |
| -8 | 2 | 8  | 39.30  | 2.80 |
| -8 | 2 | 8  | 49.90  | 3.09 |
| -8 | 2 | 8  | 37.23  | 2.94 |
| -8 | 2 | 8  | 38.40  | 2.48 |
| -8 | 2 | 8  | 37.52  | 2.48 |
| -8 | 2 | 8  | 38.90  | 2.95 |
| -8 | 2 | 8  | 41.29  | 3.48 |
| -8 | 2 | 8  | 38.78  | 2.58 |
| -8 | 2 | 8  | 36.22  | 2.32 |
| -8 | 2 | 8  | 41.26  | 2.46 |
| -8 | 2 | 8  | 38.65  | 2.84 |
| -8 | 2 | 8  | 41.32  | 2.60 |
| -8 | 2 | 8  | 40.25  | 2.86 |
| -8 | 2 | 8  | 40.42  | 2.64 |
| -8 | 2 | 9  | 27.55  | 2.14 |
| -8 | 2 | 9  | 26.76  | 2.52 |
| -8 | 2 | 9  | 26.99  | 1.94 |
| -8 | 2 | 9  | 25.75  | 1.95 |
| -8 | 2 | 9  | 30.03  | 2.15 |
| -8 | 2 | 9  | 24.40  | 2.14 |
| -8 | 2 | 9  | 29.23  | 2.53 |
| -8 | 2 | 9  | 27.50  | 2.53 |
| -8 | 2 | 9  | 28.14  | 2.43 |
| -8 | 2 | 9  | 26.44  | 2.40 |
| -8 | 2 | 9  | 26.72  | 2.21 |
| -8 | 2 | 9  | 26.84  | 2.84 |
| -8 | 2 | 9  | 25.32  | 2.44 |
| -8 | 2 | 9  | 27.80  | 2.07 |
| -8 | 2 | 9  | 27.31  | 1.99 |
| -8 | 2 | 9  | 21.91  | 2.37 |
| -8 | 2 | 9  | 28.98  | 2.26 |
| -8 | 2 | 10 | 21.22  | 2.13 |
| -8 | 2 | 10 | 28.75  | 2.18 |
| -8 | 2 | 10 | 25.83  | 2.14 |

## CIF 31

|    |   |    |        |      |
|----|---|----|--------|------|
| -8 | 2 | 10 | 22.13  | 1.94 |
| -8 | 2 | 10 | 24.49  | 1.99 |
| -8 | 2 | 10 | 22.32  | 2.47 |
| -8 | 2 | 10 | 24.22  | 1.91 |
| -8 | 2 | 10 | 26.08  | 1.94 |
| -8 | 2 | 10 | 22.85  | 1.92 |
| -8 | 2 | 10 | 23.09  | 2.22 |
| -8 | 2 | 10 | 25.20  | 2.38 |
| -8 | 2 | 10 | 23.63  | 2.16 |
| -8 | 2 | 10 | 27.56  | 2.19 |
| -8 | 2 | 10 | 23.34  | 2.32 |
| -8 | 2 | 10 | 24.43  | 2.30 |
| -8 | 2 | 10 | 26.09  | 2.41 |
| -8 | 2 | 10 | 23.78  | 2.34 |
| -8 | 2 | 11 | 362.08 | 7.70 |
| -8 | 2 | 11 | 359.36 | 8.11 |
| -8 | 2 | 11 | 358.11 | 8.11 |
| -8 | 2 | 11 | 370.26 | 8.25 |
| -8 | 2 | 11 | 403.77 | 7.68 |
| -8 | 2 | 11 | 362.32 | 7.70 |
| -8 | 2 | 11 | 360.59 | 7.06 |
| -8 | 2 | 11 | 368.49 | 8.27 |
| -8 | 2 | 11 | 327.08 | 7.37 |
| -8 | 2 | 11 | 352.01 | 7.28 |
| -8 | 2 | 11 | 387.90 | 8.38 |
| -8 | 2 | 11 | 369.83 | 7.16 |
| -8 | 2 | 11 | 350.74 | 7.67 |
| -8 | 2 | 11 | 376.23 | 7.32 |
| -8 | 2 | 11 | 403.60 | 7.76 |
| -8 | 2 | 11 | 348.98 | 7.24 |
| -8 | 2 | 12 | 8.93   | 1.39 |
| -8 | 2 | 12 | 8.65   | 1.20 |
| -8 | 2 | 12 | 8.22   | 1.48 |
| -8 | 2 | 12 | 7.88   | 1.15 |
| -8 | 2 | 12 | 7.67   | 1.27 |
| -8 | 2 | 12 | 9.08   | 1.22 |
| -8 | 2 | 12 | 8.96   | 1.34 |
| -8 | 2 | 12 | 7.36   | 1.11 |
| -8 | 2 | 12 | 7.47   | 1.32 |
| -8 | 2 | 12 | 7.91   | 1.47 |
| -8 | 2 | 13 | 1.38   | 0.74 |

## CIF 31

|    |   |    |        |      |
|----|---|----|--------|------|
| -8 | 2 | 13 | 1.93   | 0.73 |
| -8 | 2 | 13 | 1.13   | 0.87 |
| -8 | 2 | 14 | 146.12 | 2.86 |
| -8 | 2 | 14 | 170.97 | 3.56 |
| -8 | 3 | -8 | 107.98 | 3.34 |
| -8 | 3 | -8 | 106.86 | 2.96 |
| -8 | 3 | -7 | 76.00  | 2.79 |
| -8 | 3 | -7 | 75.66  | 2.68 |
| -8 | 3 | -7 | 79.28  | 2.70 |
| -8 | 3 | -7 | 76.27  | 2.83 |
| -8 | 3 | -7 | 73.55  | 2.39 |
| -8 | 3 | -6 | 9.94   | 1.51 |
| -8 | 3 | -6 | 10.77  | 1.47 |
| -8 | 3 | -6 | 13.62  | 5.10 |
| -8 | 3 | -6 | 9.99   | 1.28 |
| -8 | 3 | -6 | 11.09  | 1.39 |
| -8 | 3 | -6 | 11.21  | 1.51 |
| -8 | 3 | -6 | 9.96   | 1.20 |
| -8 | 3 | -5 | 27.18  | 2.15 |
| -8 | 3 | -5 | 24.70  | 1.97 |
| -8 | 3 | -5 | 27.20  | 1.81 |
| -8 | 3 | -5 | 30.50  | 5.67 |
| -8 | 3 | -5 | 27.63  | 2.06 |
| -8 | 3 | -5 | 24.70  | 1.61 |
| -8 | 3 | -4 | 1.87   | 1.17 |
| -8 | 3 | -4 | 4.36   | 1.09 |
| -8 | 3 | -4 | 1.03   | 0.79 |
| -8 | 3 | -4 | 1.66   | 1.24 |
| -8 | 3 | -4 | 0.88   | 0.76 |
| -8 | 3 | -4 | 0.18   | 5.37 |
| -8 | 3 | -3 | 147.48 | 3.99 |
| -8 | 3 | -3 | 158.26 | 4.84 |
| -8 | 3 | -3 | 155.28 | 4.64 |
| -8 | 3 | -3 | 159.36 | 4.77 |
| -8 | 3 | -3 | 158.04 | 4.70 |
| -8 | 3 | -3 | 160.14 | 4.89 |
| -8 | 3 | -2 | 30.49  | 2.24 |
| -8 | 3 | -2 | 30.55  | 1.80 |
| -8 | 3 | -2 | 28.24  | 2.24 |
| -8 | 3 | -2 | 31.22  | 2.41 |
| -8 | 3 | -2 | 32.30  | 2.20 |

## CIF 31

|    |   |    |        |      |
|----|---|----|--------|------|
| -8 | 3 | -2 | 25.77  | 2.14 |
| -8 | 3 | -2 | 30.41  | 2.14 |
| -8 | 3 | -1 | 85.73  | 3.24 |
| -8 | 3 | -1 | 85.96  | 3.96 |
| -8 | 3 | -1 | 78.53  | 3.42 |
| -8 | 3 | -1 | 82.48  | 3.34 |
| -8 | 3 | 0  | 2.68   | 1.04 |
| -8 | 3 | 0  | 1.95   | 0.82 |
| -8 | 3 | 0  | 1.16   | 1.15 |
| -8 | 3 | 0  | 5.33   | 1.26 |
| -8 | 3 | 0  | 1.45   | 0.88 |
| -8 | 3 | 0  | 2.41   | 1.27 |
| -8 | 3 | 0  | 1.87   | 1.24 |
| -8 | 3 | 0  | 1.74   | 1.11 |
| -8 | 3 | 1  | 38.59  | 2.13 |
| -8 | 3 | 1  | 39.05  | 2.33 |
| -8 | 3 | 1  | 38.56  | 2.97 |
| -8 | 3 | 1  | 37.15  | 2.86 |
| -8 | 3 | 1  | 35.37  | 2.97 |
| -8 | 3 | 1  | 38.97  | 2.84 |
| -8 | 3 | 1  | 40.00  | 3.01 |
| -8 | 3 | 2  | 106.21 | 4.71 |
| -8 | 3 | 2  | 111.35 | 3.07 |
| -8 | 3 | 2  | 111.84 | 3.76 |
| -8 | 3 | 2  | 113.54 | 5.16 |
| -8 | 3 | 2  | 102.43 | 4.72 |
| -8 | 3 | 2  | 109.82 | 4.64 |
| -8 | 3 | 2  | 115.69 | 3.41 |
| -8 | 3 | 2  | 111.80 | 4.84 |
| -8 | 3 | 3  | 138.59 | 4.15 |
| -8 | 3 | 3  | 138.47 | 5.47 |
| -8 | 3 | 3  | 139.95 | 5.20 |
| -8 | 3 | 3  | 152.87 | 5.50 |
| -8 | 3 | 3  | 146.25 | 5.95 |
| -8 | 3 | 3  | 140.66 | 5.40 |
| -8 | 3 | 3  | 135.09 | 4.33 |
| -8 | 3 | 3  | 135.70 | 4.17 |
| -8 | 3 | 4  | 224.64 | 7.00 |
| -8 | 3 | 4  | 215.02 | 7.43 |
| -8 | 3 | 4  | 248.94 | 5.77 |
| -8 | 3 | 4  | 239.51 | 6.03 |

## CIF 31

|    |   |   |        |       |
|----|---|---|--------|-------|
| -8 | 3 | 4 | 244.02 | 7.09  |
| -8 | 3 | 4 | 211.11 | 5.67  |
| -8 | 3 | 4 | 229.12 | 6.76  |
| -8 | 3 | 4 | 225.34 | 6.81  |
| -8 | 3 | 4 | 221.52 | 6.95  |
| -8 | 3 | 4 | 229.67 | 6.92  |
| -8 | 3 | 5 | 319.41 | 7.34  |
| -8 | 3 | 5 | 332.63 | 7.44  |
| -8 | 3 | 5 | 346.56 | 8.69  |
| -8 | 3 | 5 | 308.14 | 7.96  |
| -8 | 3 | 5 | 333.27 | 7.07  |
| -8 | 3 | 5 | 326.58 | 7.23  |
| -8 | 3 | 5 | 326.78 | 8.47  |
| -8 | 3 | 5 | 335.47 | 9.43  |
| -8 | 3 | 6 | 88.20  | 3.79  |
| -8 | 3 | 6 | 89.54  | 4.40  |
| -8 | 3 | 6 | 75.20  | 4.18  |
| -8 | 3 | 6 | 96.19  | 4.32  |
| -8 | 3 | 6 | 89.84  | 3.93  |
| -8 | 3 | 6 | 81.82  | 3.71  |
| -8 | 3 | 6 | 98.10  | 4.02  |
| -8 | 3 | 6 | 101.35 | 3.84  |
| -8 | 3 | 6 | 93.52  | 3.74  |
| -8 | 3 | 6 | 81.70  | 4.14  |
| -8 | 3 | 6 | 93.40  | 4.31  |
| -8 | 3 | 7 | 466.92 | 10.50 |
| -8 | 3 | 7 | 438.53 | 9.49  |
| -8 | 3 | 7 | 483.18 | 10.23 |
| -8 | 3 | 7 | 409.88 | 10.98 |
| -8 | 3 | 7 | 477.18 | 9.58  |
| -8 | 3 | 7 | 458.05 | 8.50  |
| -8 | 3 | 7 | 515.55 | 9.14  |
| -8 | 3 | 7 | 440.90 | 9.90  |
| -8 | 3 | 7 | 525.20 | 9.27  |
| -8 | 3 | 7 | 453.87 | 9.36  |
| -8 | 3 | 7 | 494.65 | 9.34  |
| -8 | 3 | 7 | 486.37 | 10.57 |
| -8 | 3 | 7 | 467.19 | 9.58  |
| -8 | 3 | 7 | 478.47 | 10.09 |
| -8 | 3 | 8 | 241.44 | 6.08  |
| -8 | 3 | 8 | 240.45 | 6.69  |

## CIF 31

|    |   |    |        |      |
|----|---|----|--------|------|
| -8 | 3 | 8  | 240.60 | 6.11 |
| -8 | 3 | 8  | 240.09 | 6.76 |
| -8 | 3 | 8  | 219.54 | 6.00 |
| -8 | 3 | 8  | 252.71 | 6.10 |
| -8 | 3 | 8  | 244.16 | 6.26 |
| -8 | 3 | 8  | 233.10 | 7.17 |
| -8 | 3 | 8  | 229.04 | 7.81 |
| -8 | 3 | 8  | 237.67 | 7.03 |
| -8 | 3 | 8  | 241.61 | 6.33 |
| -8 | 3 | 8  | 256.84 | 6.86 |
| -8 | 3 | 8  | 217.21 | 6.62 |
| -8 | 3 | 8  | 251.68 | 7.34 |
| -8 | 3 | 9  | 95.21  | 4.09 |
| -8 | 3 | 9  | 101.06 | 5.06 |
| -8 | 3 | 9  | 113.56 | 4.56 |
| -8 | 3 | 9  | 104.83 | 4.47 |
| -8 | 3 | 9  | 103.59 | 4.42 |
| -8 | 3 | 9  | 118.30 | 4.23 |
| -8 | 3 | 9  | 110.47 | 3.97 |
| -8 | 3 | 9  | 105.05 | 4.69 |
| -8 | 3 | 9  | 107.79 | 4.09 |
| -8 | 3 | 9  | 98.66  | 4.56 |
| -8 | 3 | 9  | 112.25 | 4.16 |
| -8 | 3 | 9  | 115.39 | 4.64 |
| -8 | 3 | 9  | 105.75 | 4.00 |
| -8 | 3 | 10 | 0.56   | 1.32 |
| -8 | 3 | 10 | 0.75   | 1.11 |
| -8 | 3 | 10 | 1.04   | 0.81 |
| -8 | 3 | 10 | 1.66   | 0.93 |
| -8 | 3 | 10 | 0.73   | 0.77 |
| -8 | 3 | 10 | 0.79   | 1.13 |
| -8 | 3 | 10 | 0.64   | 1.01 |
| -8 | 3 | 10 | 1.26   | 0.87 |
| -8 | 3 | 10 | 1.32   | 1.18 |
| -8 | 3 | 10 | 1.08   | 1.05 |
| -8 | 3 | 10 | 0.52   | 0.89 |
| -8 | 3 | 10 | 0.77   | 1.06 |
| -8 | 3 | 10 | 0.55   | 1.22 |
| -8 | 3 | 11 | 25.52  | 2.25 |
| -8 | 3 | 11 | 30.88  | 2.39 |
| -8 | 3 | 11 | 27.38  | 1.78 |

## CIF 31

|    |   |    |        |      |
|----|---|----|--------|------|
| -8 | 3 | 11 | 26.10  | 1.87 |
| -8 | 3 | 11 | 29.62  | 2.17 |
| -8 | 3 | 11 | 31.49  | 2.23 |
| -8 | 3 | 11 | 29.99  | 2.38 |
| -8 | 3 | 11 | 27.77  | 2.03 |
| -8 | 3 | 11 | 28.31  | 2.18 |
| -8 | 3 | 11 | 33.65  | 2.40 |
| -8 | 3 | 11 | 30.07  | 2.17 |
| -8 | 3 | 11 | 29.52  | 2.30 |
| -8 | 3 | 11 | 31.56  | 2.44 |
| -8 | 3 | 11 | 27.16  | 2.25 |
| -8 | 3 | 11 | 30.12  | 1.91 |
| -8 | 3 | 12 | 176.69 | 5.04 |
| -8 | 3 | 12 | 166.47 | 4.83 |
| -8 | 3 | 12 | 165.73 | 4.13 |
| -8 | 3 | 12 | 189.65 | 4.87 |
| -8 | 3 | 12 | 182.28 | 5.11 |
| -8 | 3 | 12 | 169.09 | 4.57 |
| -8 | 3 | 12 | 183.42 | 4.26 |
| -8 | 3 | 12 | 183.46 | 4.74 |
| -8 | 3 | 12 | 173.68 | 5.03 |
| -8 | 3 | 12 | 185.86 | 5.15 |
| -8 | 3 | 13 | 61.53  | 2.42 |
| -8 | 3 | 13 | 63.58  | 2.66 |
| -8 | 3 | 13 | 67.44  | 2.72 |
| -8 | 3 | 13 | 64.95  | 2.49 |
| -8 | 3 | 14 | 7.15   | 0.73 |
| -8 | 3 | 14 | 7.05   | 0.85 |
| -8 | 4 | -9 | 30.03  | 2.34 |
| -8 | 4 | -8 | 217.09 | 4.13 |
| -8 | 4 | -8 | 231.16 | 4.55 |
| -8 | 4 | -7 | 6.10   | 1.18 |
| -8 | 4 | -7 | 2.95   | 4.12 |
| -8 | 4 | -7 | 6.70   | 1.05 |
| -8 | 4 | -7 | 6.77   | 1.03 |
| -8 | 4 | -7 | 5.51   | 1.26 |
| -8 | 4 | -6 | 80.97  | 3.19 |
| -8 | 4 | -6 | 79.42  | 2.97 |
| -8 | 4 | -6 | 74.05  | 2.73 |
| -8 | 4 | -6 | 80.61  | 3.40 |
| -8 | 4 | -6 | 79.57  | 3.07 |

## CIF 31

|    |   |    |         |       |
|----|---|----|---------|-------|
| -8 | 4 | -5 | 81.50   | 3.18  |
| -8 | 4 | -5 | 69.54   | 5.94  |
| -8 | 4 | -5 | 75.16   | 2.96  |
| -8 | 4 | -4 | 506.21  | 8.93  |
| -8 | 4 | -4 | 491.52  | 8.91  |
| -8 | 4 | -4 | 500.71  | 8.29  |
| -8 | 4 | -3 | 105.17  | 3.82  |
| -8 | 4 | -3 | 100.69  | 3.95  |
| -8 | 4 | -3 | 105.91  | 3.56  |
| -8 | 4 | -3 | 102.50  | 3.82  |
| -8 | 4 | -3 | 107.43  | 3.93  |
| -8 | 4 | -2 | 13.94   | 1.67  |
| -8 | 4 | -2 | 14.56   | 1.57  |
| -8 | 4 | -2 | 14.83   | 1.63  |
| -8 | 4 | -2 | 16.55   | 1.96  |
| -8 | 4 | -2 | 15.22   | 1.78  |
| -8 | 4 | -2 | 14.51   | 1.41  |
| -8 | 4 | -1 | 168.21  | 4.86  |
| -8 | 4 | -1 | 161.06  | 4.43  |
| -8 | 4 | -1 | 156.43  | 4.80  |
| -8 | 4 | -1 | 157.16  | 5.60  |
| -8 | 4 | -1 | 164.18  | 4.23  |
| -8 | 4 | -1 | 165.91  | 4.68  |
| -8 | 4 | -1 | 153.92  | 5.43  |
| -8 | 4 | -1 | 163.47  | 4.80  |
| -8 | 4 | 0  | 12.66   | 1.58  |
| -8 | 4 | 0  | 14.55   | 1.67  |
| -8 | 4 | 0  | 10.53   | 1.78  |
| -8 | 4 | 0  | 9.26    | 1.48  |
| -8 | 4 | 0  | 12.83   | 1.42  |
| -8 | 4 | 0  | 8.83    | 1.62  |
| -8 | 4 | 0  | 11.27   | 1.86  |
| -8 | 4 | 0  | 7.74    | 1.53  |
| -8 | 4 | 1  | 1055.02 | 12.51 |
| -8 | 4 | 1  | 1093.16 | 16.66 |
| -8 | 4 | 1  | 1058.67 | 15.83 |
| -8 | 4 | 1  | 1052.50 | 16.93 |
| -8 | 4 | 1  | 1129.81 | 14.14 |
| -8 | 4 | 1  | 1093.81 | 16.50 |
| -8 | 4 | 1  | 1005.04 | 13.08 |
| -8 | 4 | 1  | 1040.97 | 16.49 |



## CIF 31

|    |   |   |         |       |
|----|---|---|---------|-------|
| -8 | 4 | 2 | 25.16   | 2.41  |
| -8 | 4 | 2 | 24.40   | 2.34  |
| -8 | 4 | 2 | 21.55   | 1.50  |
| -8 | 4 | 2 | 24.25   | 2.50  |
| -8 | 4 | 2 | 27.44   | 2.73  |
| -8 | 4 | 2 | 22.81   | 1.78  |
| -8 | 4 | 2 | 24.03   | 2.35  |
| -8 | 4 | 2 | 26.97   | 1.98  |
| -8 | 4 | 2 | 27.06   | 2.60  |
| -8 | 4 | 2 | 24.79   | 2.33  |
| -8 | 4 | 3 | 1102.52 | 18.13 |
| -8 | 4 | 3 | 1144.87 | 15.04 |
| -8 | 4 | 3 | 1134.58 | 17.39 |
| -8 | 4 | 3 | 1128.60 | 14.14 |
| -8 | 4 | 3 | 1115.00 | 16.96 |
| -8 | 4 | 3 | 1150.78 | 17.01 |
| -8 | 4 | 3 | 1172.75 | 17.14 |
| -8 | 4 | 3 | 1115.46 | 17.35 |
| -8 | 4 | 4 | 317.30  | 7.07  |
| -8 | 4 | 4 | 329.21  | 8.34  |
| -8 | 4 | 4 | 308.90  | 6.75  |
| -8 | 4 | 4 | 327.83  | 6.92  |
| -8 | 4 | 4 | 328.77  | 8.17  |
| -8 | 4 | 4 | 308.76  | 8.31  |
| -8 | 4 | 4 | 320.54  | 9.02  |
| -8 | 4 | 4 | 296.91  | 7.98  |
| -8 | 4 | 4 | 335.66  | 8.41  |
| -8 | 4 | 4 | 333.67  | 6.22  |
| -8 | 4 | 5 | 441.24  | 9.81  |
| -8 | 4 | 5 | 467.99  | 8.78  |
| -8 | 4 | 5 | 464.54  | 10.01 |
| -8 | 4 | 5 | 462.81  | 10.25 |
| -8 | 4 | 5 | 444.67  | 8.59  |
| -8 | 4 | 5 | 454.22  | 8.64  |
| -8 | 4 | 5 | 431.22  | 9.95  |
| -8 | 4 | 5 | 460.58  | 8.76  |
| -8 | 4 | 5 | 414.32  | 10.64 |
| -8 | 4 | 5 | 461.03  | 10.39 |
| -8 | 4 | 5 | 480.97  | 9.64  |
| -8 | 4 | 5 | 442.21  | 9.99  |
| -8 | 4 | 5 | 457.51  | 8.77  |

## CIF 31

|    |   |   |         |       |
|----|---|---|---------|-------|
| -8 | 4 | 6 | 1.57    | 1.01  |
| -8 | 4 | 6 | 3.36    | 1.36  |
| -8 | 4 | 6 | 2.98    | 1.11  |
| -8 | 4 | 6 | 1.70    | 1.03  |
| -8 | 4 | 6 | 2.90    | 1.09  |
| -8 | 4 | 6 | 2.66    | 1.06  |
| -8 | 4 | 6 | 2.32    | 1.26  |
| -8 | 4 | 6 | 0.97    | 1.26  |
| -8 | 4 | 6 | 3.38    | 1.16  |
| -8 | 4 | 7 | 641.24  | 11.79 |
| -8 | 4 | 7 | 714.87  | 11.91 |
| -8 | 4 | 7 | 727.65  | 11.63 |
| -8 | 4 | 7 | 667.20  | 14.00 |
| -8 | 4 | 7 | 686.00  | 11.85 |
| -8 | 4 | 7 | 687.08  | 12.71 |
| -8 | 4 | 7 | 706.87  | 11.82 |
| -8 | 4 | 7 | 693.37  | 11.11 |
| -8 | 4 | 7 | 734.98  | 13.61 |
| -8 | 4 | 7 | 734.95  | 12.85 |
| -8 | 4 | 7 | 714.11  | 11.61 |
| -8 | 4 | 7 | 665.23  | 12.69 |
| -8 | 4 | 8 | 22.45   | 2.10  |
| -8 | 4 | 8 | 22.91   | 2.75  |
| -8 | 4 | 8 | 33.79   | 2.37  |
| -8 | 4 | 8 | 27.57   | 2.18  |
| -8 | 4 | 8 | 22.75   | 2.45  |
| -8 | 4 | 8 | 22.18   | 2.46  |
| -8 | 4 | 8 | 28.57   | 2.42  |
| -8 | 4 | 8 | 25.60   | 2.48  |
| -8 | 4 | 8 | 24.35   | 1.95  |
| -8 | 4 | 8 | 25.08   | 2.48  |
| -8 | 4 | 8 | 22.08   | 2.29  |
| -8 | 4 | 8 | 26.77   | 2.33  |
| -8 | 4 | 8 | 25.51   | 1.95  |
| -8 | 4 | 8 | 24.35   | 2.05  |
| -8 | 4 | 9 | 1610.67 | 19.24 |
| -8 | 4 | 9 | 1605.70 | 21.21 |
| -8 | 4 | 9 | 1648.69 | 22.15 |
| -8 | 4 | 9 | 1651.22 | 22.18 |
| -8 | 4 | 9 | 1702.40 | 22.13 |
| -8 | 4 | 9 | 1720.18 | 20.09 |

## CIF 31

|    |   |    |         |       |
|----|---|----|---------|-------|
| -8 | 4 | 9  | 1693.98 | 21.15 |
| -8 | 4 | 9  | 1528.58 | 20.74 |
| -8 | 4 | 9  | 1755.95 | 22.37 |
| -8 | 4 | 9  | 1697.98 | 21.31 |
| -8 | 4 | 9  | 1660.04 | 23.51 |
| -8 | 4 | 9  | 1817.89 | 21.01 |
| -8 | 4 | 9  | 1651.07 | 19.64 |
| -8 | 4 | 9  | 1732.16 | 20.20 |
| -8 | 4 | 10 | 1.38    | 0.94  |
| -8 | 4 | 10 | 2.64    | 1.26  |
| -8 | 4 | 10 | 1.78    | 1.08  |
| -8 | 4 | 10 | 1.44    | 1.18  |
| -8 | 4 | 10 | 3.10    | 1.42  |
| -8 | 4 | 10 | 1.17    | 1.06  |
| -8 | 4 | 10 | 1.85    | 1.31  |
| -8 | 4 | 10 | 4.44    | 1.15  |
| -8 | 4 | 10 | 1.42    | 0.75  |
| -8 | 4 | 10 | 0.99    | 1.20  |
| -8 | 4 | 11 | 319.92  | 7.07  |
| -8 | 4 | 11 | 339.62  | 7.43  |
| -8 | 4 | 11 | 346.26  | 6.92  |
| -8 | 4 | 11 | 354.05  | 7.53  |
| -8 | 4 | 11 | 330.35  | 6.69  |
| -8 | 4 | 11 | 309.72  | 7.12  |
| -8 | 4 | 11 | 315.72  | 7.26  |
| -8 | 4 | 11 | 338.34  | 7.44  |
| -8 | 4 | 11 | 326.47  | 7.41  |
| -8 | 4 | 12 | 1.25    | 0.97  |
| -8 | 4 | 12 | 0.07    | 0.87  |
| -8 | 4 | 12 | -0.03   | 0.82  |
| -8 | 4 | 12 | 0.21    | 0.67  |
| -8 | 4 | 12 | 0.18    | 0.83  |
| -8 | 4 | 12 | 0.19    | 0.70  |
| -8 | 4 | 12 | 0.59    | 0.80  |
| -8 | 4 | 12 | 1.28    | 0.90  |
| -8 | 4 | 13 | 34.25   | 1.82  |
| -8 | 4 | 13 | 31.42   | 1.55  |
| -8 | 4 | 13 | 33.04   | 1.82  |
| -8 | 5 | -9 | 9.11    | 2.43  |
| -8 | 5 | -9 | 9.16    | 1.20  |
| -8 | 5 | -8 | 9.49    | 1.53  |

## CIF 31

|    |   |    |        |       |
|----|---|----|--------|-------|
| -8 | 5 | -8 | 9.24   | 1.43  |
| -8 | 5 | -8 | 9.53   | 1.18  |
| -8 | 5 | -8 | 9.27   | 1.05  |
| -8 | 5 | -7 | 7.13   | 1.06  |
| -8 | 5 | -7 | 6.85   | 1.14  |
| -8 | 5 | -7 | 5.24   | 1.20  |
| -8 | 5 | -7 | 7.23   | 1.15  |
| -8 | 5 | -6 | 80.34  | 3.25  |
| -8 | 5 | -6 | 77.31  | 2.96  |
| -8 | 5 | -6 | 82.96  | 3.17  |
| -8 | 5 | -6 | 85.48  | 3.23  |
| -8 | 5 | -6 | 79.71  | 3.26  |
| -8 | 5 | -5 | 1.67   | 0.88  |
| -8 | 5 | -5 | 1.89   | 1.18  |
| -8 | 5 | -5 | 1.74   | 1.33  |
| -8 | 5 | -4 | 112.47 | 3.99  |
| -8 | 5 | -4 | 107.99 | 3.98  |
| -8 | 5 | -4 | 105.66 | 3.93  |
| -8 | 5 | -4 | 107.13 | 3.71  |
| -8 | 5 | -3 | 1.04   | 0.99  |
| -8 | 5 | -3 | 0.16   | 0.95  |
| -8 | 5 | -3 | 0.08   | 1.01  |
| -8 | 5 | -3 | 0.04   | 0.98  |
| -8 | 5 | -3 | 0.45   | 0.88  |
| -8 | 5 | -2 | 217.94 | 5.65  |
| -8 | 5 | -2 | 212.16 | 5.59  |
| -8 | 5 | -2 | 222.39 | 5.36  |
| -8 | 5 | -2 | 207.12 | 6.34  |
| -8 | 5 | -2 | 221.26 | 5.64  |
| -8 | 5 | -2 | 211.21 | 5.55  |
| -8 | 5 | -1 | 12.84  | 1.55  |
| -8 | 5 | -1 | 10.89  | 1.53  |
| -8 | 5 | -1 | 13.21  | 1.52  |
| -8 | 5 | -1 | 13.37  | 1.58  |
| -8 | 5 | -1 | 9.14   | 1.72  |
| -8 | 5 | -1 | 7.53   | 1.47  |
| -8 | 5 | 0  | 555.09 | 10.05 |
| -8 | 5 | 0  | 552.51 | 9.33  |
| -8 | 5 | 0  | 540.00 | 8.23  |
| -8 | 5 | 0  | 553.44 | 10.88 |
| -8 | 5 | 0  | 503.02 | 11.17 |

## CIF 31

|    |   |   |        |       |
|----|---|---|--------|-------|
| -8 | 5 | 0 | 608.86 | 9.73  |
| -8 | 5 | 0 | 578.36 | 9.40  |
| -8 | 5 | 0 | 537.95 | 11.16 |
| -8 | 5 | 0 | 566.78 | 10.70 |
| -8 | 5 | 0 | 546.75 | 8.87  |
| -8 | 5 | 1 | 94.99  | 3.41  |
| -8 | 5 | 1 | 75.35  | 4.13  |
| -8 | 5 | 1 | 86.74  | 2.96  |
| -8 | 5 | 1 | 83.33  | 2.95  |
| -8 | 5 | 1 | 80.47  | 4.13  |
| -8 | 5 | 1 | 76.22  | 3.87  |
| -8 | 5 | 1 | 70.68  | 3.77  |
| -8 | 5 | 1 | 74.67  | 4.14  |
| -8 | 5 | 1 | 77.46  | 3.73  |
| -8 | 5 | 1 | 75.77  | 3.71  |
| -8 | 5 | 2 | 295.04 | 8.25  |
| -8 | 5 | 2 | 298.29 | 7.83  |
| -8 | 5 | 2 | 304.46 | 8.00  |
| -8 | 5 | 2 | 292.08 | 8.01  |
| -8 | 5 | 2 | 272.73 | 7.85  |
| -8 | 5 | 2 | 317.98 | 6.07  |
| -8 | 5 | 2 | 303.36 | 7.56  |
| -8 | 5 | 2 | 294.54 | 7.56  |
| -8 | 5 | 2 | 297.18 | 6.81  |
| -8 | 5 | 2 | 276.04 | 5.84  |
| -8 | 5 | 3 | 190.01 | 6.78  |
| -8 | 5 | 3 | 187.44 | 6.27  |
| -8 | 5 | 3 | 196.26 | 6.19  |
| -8 | 5 | 3 | 183.66 | 6.66  |
| -8 | 5 | 3 | 199.86 | 5.55  |
| -8 | 5 | 3 | 189.96 | 6.47  |
| -8 | 5 | 3 | 191.33 | 6.19  |
| -8 | 5 | 3 | 195.10 | 4.62  |
| -8 | 5 | 3 | 195.72 | 6.18  |
| -8 | 5 | 3 | 166.08 | 6.14  |
| -8 | 5 | 4 | 101.21 | 4.51  |
| -8 | 5 | 4 | 109.28 | 5.24  |
| -8 | 5 | 4 | 102.55 | 4.17  |
| -8 | 5 | 4 | 114.28 | 4.97  |
| -8 | 5 | 4 | 101.80 | 3.97  |
| -8 | 5 | 4 | 106.25 | 4.68  |

## CIF 31

|    |   |   |        |       |
|----|---|---|--------|-------|
| -8 | 5 | 4 | 93.34  | 4.68  |
| -8 | 5 | 4 | 90.76  | 4.51  |
| -8 | 5 | 5 | 729.08 | 14.31 |
| -8 | 5 | 5 | 783.25 | 12.15 |
| -8 | 5 | 5 | 734.73 | 13.40 |
| -8 | 5 | 5 | 705.05 | 13.54 |
| -8 | 5 | 5 | 762.67 | 11.50 |
| -8 | 5 | 5 | 696.38 | 13.32 |
| -8 | 5 | 5 | 721.09 | 11.34 |
| -8 | 5 | 5 | 761.13 | 11.45 |
| -8 | 5 | 5 | 765.49 | 12.59 |
| -8 | 5 | 5 | 708.97 | 13.23 |
| -8 | 5 | 5 | 693.18 | 13.46 |
| -8 | 5 | 5 | 748.82 | 13.23 |
| -8 | 5 | 6 | 300.83 | 7.84  |
| -8 | 5 | 6 | 299.46 | 8.19  |
| -8 | 5 | 6 | 297.37 | 6.93  |
| -8 | 5 | 6 | 273.57 | 7.83  |
| -8 | 5 | 6 | 261.67 | 7.52  |
| -8 | 5 | 6 | 285.16 | 7.90  |
| -8 | 5 | 6 | 291.59 | 7.84  |
| -8 | 5 | 6 | 286.43 | 6.73  |
| -8 | 5 | 6 | 308.73 | 7.16  |
| -8 | 5 | 6 | 302.62 | 7.61  |
| -8 | 5 | 6 | 273.38 | 6.68  |
| -8 | 5 | 6 | 284.28 | 8.15  |
| -8 | 5 | 7 | 128.92 | 4.60  |
| -8 | 5 | 7 | 128.54 | 4.57  |
| -8 | 5 | 7 | 131.91 | 5.29  |
| -8 | 5 | 7 | 142.63 | 6.21  |
| -8 | 5 | 7 | 130.48 | 5.09  |
| -8 | 5 | 7 | 123.89 | 4.75  |
| -8 | 5 | 7 | 120.02 | 4.87  |
| -8 | 5 | 7 | 135.90 | 4.78  |
| -8 | 5 | 7 | 129.80 | 5.24  |
| -8 | 5 | 8 | 4.10   | 1.38  |
| -8 | 5 | 8 | 3.85   | 1.08  |
| -8 | 5 | 8 | 3.50   | 1.18  |
| -8 | 5 | 8 | 4.55   | 1.35  |
| -8 | 5 | 8 | 3.64   | 1.77  |
| -8 | 5 | 8 | 3.75   | 1.52  |

## CIF 31

|    |   |    |        |      |
|----|---|----|--------|------|
| -8 | 5 | 8  | 5.19   | 1.70 |
| -8 | 5 | 8  | 5.24   | 1.39 |
| -8 | 5 | 8  | 3.73   | 1.51 |
| -8 | 5 | 9  | 99.07  | 4.38 |
| -8 | 5 | 9  | 100.77 | 4.56 |
| -8 | 5 | 9  | 88.56  | 4.04 |
| -8 | 5 | 9  | 88.40  | 4.30 |
| -8 | 5 | 9  | 91.98  | 3.90 |
| -8 | 5 | 9  | 96.86  | 3.78 |
| -8 | 5 | 9  | 102.41 | 4.48 |
| -8 | 5 | 9  | 89.34  | 3.90 |
| -8 | 5 | 9  | 96.70  | 4.68 |
| -8 | 5 | 9  | 94.70  | 4.04 |
| -8 | 5 | 10 | 152.20 | 4.34 |
| -8 | 5 | 10 | 164.80 | 5.02 |
| -8 | 5 | 10 | 161.99 | 5.35 |
| -8 | 5 | 10 | 160.32 | 4.69 |
| -8 | 5 | 10 | 154.40 | 4.94 |
| -8 | 5 | 10 | 151.87 | 5.11 |
| -8 | 5 | 10 | 151.41 | 4.93 |
| -8 | 5 | 10 | 143.10 | 5.29 |
| -8 | 5 | 10 | 155.14 | 5.33 |
| -8 | 5 | 10 | 136.49 | 4.99 |
| -8 | 5 | 10 | 147.52 | 4.21 |
| -8 | 5 | 11 | 62.17  | 2.56 |
| -8 | 5 | 11 | 67.23  | 2.99 |
| -8 | 5 | 11 | 57.80  | 2.84 |
| -8 | 5 | 11 | 53.52  | 2.69 |
| -8 | 5 | 11 | 67.55  | 3.08 |
| -8 | 5 | 11 | 66.55  | 3.23 |
| -8 | 5 | 11 | 59.23  | 2.94 |
| -8 | 5 | 11 | 66.07  | 3.02 |
| -8 | 5 | 12 | 11.94  | 1.35 |
| -8 | 5 | 12 | 12.66  | 1.13 |
| -8 | 5 | 12 | 13.64  | 1.36 |
| -8 | 5 | 12 | 10.56  | 1.23 |
| -8 | 5 | 12 | 13.14  | 1.34 |
| -8 | 5 | 12 | 13.17  | 1.10 |
| -8 | 5 | 13 | 102.46 | 2.68 |
| -8 | 5 | 13 | 102.29 | 2.62 |
| -8 | 6 | -9 | 43.88  | 1.56 |

## CIF 31

|    |   |    |         |       |
|----|---|----|---------|-------|
| -8 | 6 | -9 | 39.91   | 1.86  |
| -8 | 6 | -8 | 59.46   | 2.47  |
| -8 | 6 | -8 | 57.52   | 2.69  |
| -8 | 6 | -8 | 61.13   | 2.38  |
| -8 | 6 | -8 | 62.48   | 2.31  |
| -8 | 6 | -7 | 163.25  | 4.20  |
| -8 | 6 | -7 | 155.57  | 3.98  |
| -8 | 6 | -7 | 152.68  | 4.02  |
| -8 | 6 | -7 | 150.48  | 4.17  |
| -8 | 6 | -7 | 153.97  | 4.08  |
| -8 | 6 | -6 | 187.18  | 4.90  |
| -8 | 6 | -6 | 189.62  | 4.86  |
| -8 | 6 | -6 | 200.86  | 5.12  |
| -8 | 6 | -6 | 185.12  | 4.69  |
| -8 | 6 | -5 | 148.08  | 4.43  |
| -8 | 6 | -5 | 143.12  | 4.26  |
| -8 | 6 | -5 | 149.27  | 4.63  |
| -8 | 6 | -4 | 557.12  | 9.22  |
| -8 | 6 | -4 | 550.31  | 9.36  |
| -8 | 6 | -4 | 550.46  | 9.54  |
| -8 | 6 | -3 | 1120.16 | 14.88 |
| -8 | 6 | -3 | 1139.34 | 14.65 |
| -8 | 6 | -3 | 1127.79 | 14.75 |
| -8 | 6 | -3 | 1096.01 | 14.58 |
| -8 | 6 | -2 | 964.06  | 13.29 |
| -8 | 6 | -2 | 923.28  | 13.14 |
| -8 | 6 | -2 | 946.80  | 13.09 |
| -8 | 6 | -2 | 1004.37 | 13.28 |
| -8 | 6 | -2 | 896.35  | 14.98 |
| -8 | 6 | -1 | 208.91  | 7.56  |
| -8 | 6 | -1 | 215.92  | 4.99  |
| -8 | 6 | -1 | 248.22  | 5.73  |
| -8 | 6 | -1 | 211.90  | 6.72  |
| -8 | 6 | -1 | 233.53  | 5.52  |
| -8 | 6 | -1 | 228.35  | 5.53  |
| -8 | 6 | -1 | 196.29  | 5.85  |
| -8 | 6 | 0  | 35.45   | 2.13  |
| -8 | 6 | 0  | 31.09   | 1.89  |
| -8 | 6 | 0  | 26.57   | 2.23  |
| -8 | 6 | 0  | 21.18   | 2.77  |
| -8 | 6 | 0  | 34.40   | 2.15  |



## CIF 31

|    |   |   |        |      |
|----|---|---|--------|------|
| -8 | 6 | 0 | 27.71  | 2.50 |
| -8 | 6 | 0 | 25.80  | 2.20 |
| -8 | 6 | 0 | 24.89  | 2.27 |
| -8 | 6 | 0 | 24.17  | 2.61 |
| -8 | 6 | 0 | 35.18  | 2.10 |
| -8 | 6 | 0 | 25.42  | 2.79 |
| -8 | 6 | 1 | 1.35   | 1.41 |
| -8 | 6 | 1 | 2.78   | 1.38 |
| -8 | 6 | 1 | 3.90   | 1.17 |
| -8 | 6 | 1 | 1.70   | 1.29 |
| -8 | 6 | 1 | 3.34   | 1.83 |
| -8 | 6 | 1 | 2.32   | 1.39 |
| -8 | 6 | 1 | 2.58   | 1.19 |
| -8 | 6 | 1 | 3.37   | 0.95 |
| -8 | 6 | 1 | 2.96   | 1.22 |
| -8 | 6 | 1 | 4.05   | 0.99 |
| -8 | 6 | 1 | 3.23   | 0.84 |
| -8 | 6 | 1 | 3.99   | 0.95 |
| -8 | 6 | 2 | 227.33 | 6.64 |
| -8 | 6 | 2 | 206.86 | 6.78 |
| -8 | 6 | 2 | 212.27 | 6.31 |
| -8 | 6 | 2 | 190.32 | 4.60 |
| -8 | 6 | 2 | 181.92 | 4.50 |
| -8 | 6 | 2 | 215.36 | 6.21 |
| -8 | 6 | 2 | 195.03 | 6.64 |
| -8 | 6 | 2 | 199.92 | 4.91 |
| -8 | 6 | 2 | 215.93 | 6.54 |
| -8 | 6 | 2 | 218.46 | 6.85 |
| -8 | 6 | 3 | 142.26 | 5.23 |
| -8 | 6 | 3 | 146.00 | 4.75 |
| -8 | 6 | 3 | 129.26 | 5.27 |
| -8 | 6 | 3 | 137.88 | 4.53 |
| -8 | 6 | 3 | 126.31 | 4.01 |
| -8 | 6 | 3 | 134.30 | 5.69 |
| -8 | 6 | 3 | 132.67 | 5.45 |
| -8 | 6 | 3 | 115.12 | 5.71 |
| -8 | 6 | 3 | 118.94 | 5.35 |
| -8 | 6 | 3 | 144.10 | 5.38 |
| -8 | 6 | 4 | 3.57   | 1.68 |
| -8 | 6 | 4 | 4.33   | 1.62 |
| -8 | 6 | 4 | 4.10   | 1.57 |

## CIF 31

|    |   |   |         |       |
|----|---|---|---------|-------|
| -8 | 6 | 4 | 4.79    | 1.55  |
| -8 | 6 | 4 | 6.50    | 1.63  |
| -8 | 6 | 4 | 3.20    | 0.86  |
| -8 | 6 | 4 | 3.72    | 1.16  |
| -8 | 6 | 4 | 4.24    | 1.52  |
| -8 | 6 | 5 | 527.19  | 11.25 |
| -8 | 6 | 5 | 558.35  | 11.43 |
| -8 | 6 | 5 | 518.38  | 11.75 |
| -8 | 6 | 5 | 566.94  | 10.37 |
| -8 | 6 | 5 | 495.93  | 10.69 |
| -8 | 6 | 5 | 485.18  | 10.38 |
| -8 | 6 | 5 | 536.31  | 11.40 |
| -8 | 6 | 5 | 531.86  | 11.03 |
| -8 | 6 | 5 | 541.27  | 8.80  |
| -8 | 6 | 5 | 537.08  | 11.49 |
| -8 | 6 | 6 | 581.42  | 10.91 |
| -8 | 6 | 6 | 570.93  | 11.98 |
| -8 | 6 | 6 | 553.42  | 11.47 |
| -8 | 6 | 6 | 592.90  | 11.68 |
| -8 | 6 | 6 | 577.86  | 9.25  |
| -8 | 6 | 6 | 595.55  | 9.98  |
| -8 | 6 | 6 | 572.08  | 10.24 |
| -8 | 6 | 6 | 573.81  | 11.78 |
| -8 | 6 | 6 | 584.34  | 11.72 |
| -8 | 6 | 6 | 573.43  | 11.51 |
| -8 | 6 | 6 | 576.70  | 11.84 |
| -8 | 6 | 7 | 1637.03 | 20.39 |
| -8 | 6 | 7 | 1782.08 | 20.80 |
| -8 | 6 | 7 | 1530.14 | 21.52 |
| -8 | 6 | 7 | 1725.60 | 22.22 |
| -8 | 6 | 7 | 1698.40 | 22.25 |
| -8 | 6 | 7 | 1699.54 | 22.67 |
| -8 | 6 | 7 | 1690.43 | 22.79 |
| -8 | 6 | 7 | 1851.68 | 21.73 |
| -8 | 6 | 7 | 1672.85 | 20.37 |
| -8 | 6 | 7 | 1787.46 | 24.38 |
| -8 | 6 | 7 | 1489.43 | 21.50 |
| -8 | 6 | 7 | 1727.32 | 20.23 |
| -8 | 6 | 8 | 244.31  | 7.63  |
| -8 | 6 | 8 | 256.38  | 6.38  |
| -8 | 6 | 8 | 256.75  | 6.31  |

## CIF 31

|    |   |    |        |      |
|----|---|----|--------|------|
| -8 | 6 | 8  | 242.31 | 6.06 |
| -8 | 6 | 8  | 214.75 | 6.91 |
| -8 | 6 | 8  | 213.65 | 6.20 |
| -8 | 6 | 8  | 262.66 | 6.97 |
| -8 | 6 | 8  | 223.77 | 6.70 |
| -8 | 6 | 8  | 239.11 | 6.18 |
| -8 | 6 | 8  | 254.10 | 7.14 |
| -8 | 6 | 9  | 1.18   | 1.33 |
| -8 | 6 | 9  | 1.69   | 1.25 |
| -8 | 6 | 9  | 1.56   | 0.99 |
| -8 | 6 | 9  | 0.54   | 0.82 |
| -8 | 6 | 9  | 1.02   | 0.99 |
| -8 | 6 | 9  | 1.30   | 0.85 |
| -8 | 6 | 9  | 2.81   | 1.23 |
| -8 | 6 | 9  | 0.74   | 1.12 |
| -8 | 6 | 9  | 1.67   | 1.04 |
| -8 | 6 | 10 | 39.66  | 2.69 |
| -8 | 6 | 10 | 38.69  | 2.59 |
| -8 | 6 | 10 | 39.43  | 2.30 |
| -8 | 6 | 10 | 41.20  | 2.62 |
| -8 | 6 | 10 | 36.90  | 2.60 |
| -8 | 6 | 10 | 37.22  | 2.29 |
| -8 | 6 | 10 | 36.48  | 2.48 |
| -8 | 6 | 10 | 35.92  | 2.24 |
| -8 | 6 | 10 | 33.81  | 2.46 |
| -8 | 6 | 11 | 6.50   | 1.19 |
| -8 | 6 | 11 | 6.42   | 1.02 |
| -8 | 6 | 11 | 4.86   | 1.04 |
| -8 | 6 | 11 | 6.22   | 1.21 |
| -8 | 6 | 11 | 5.52   | 1.03 |
| -8 | 6 | 11 | 5.87   | 1.12 |
| -8 | 6 | 12 | 53.65  | 2.20 |
| -8 | 6 | 12 | 49.31  | 2.07 |
| -8 | 6 | 12 | 56.71  | 2.10 |
| -8 | 6 | 12 | 48.16  | 1.79 |
| -8 | 6 | 12 | 57.73  | 1.99 |
| -8 | 7 | -9 | 54.04  | 1.69 |
| -8 | 7 | -9 | 47.96  | 2.05 |
| -8 | 7 | -8 | 128.11 | 3.44 |
| -8 | 7 | -8 | 138.74 | 3.40 |
| -8 | 7 | -8 | 128.20 | 3.17 |

## CIF 31

|    |   |    |        |       |
|----|---|----|--------|-------|
| -8 | 7 | -8 | 132.06 | 3.92  |
| -8 | 7 | -7 | 38.81  | 1.94  |
| -8 | 7 | -7 | 41.46  | 2.22  |
| -8 | 7 | -7 | 45.23  | 2.17  |
| -8 | 7 | -7 | 47.31  | 2.25  |
| -8 | 7 | -7 | 41.96  | 2.17  |
| -8 | 7 | -6 | 5.37   | 1.09  |
| -8 | 7 | -6 | 5.75   | 1.22  |
| -8 | 7 | -6 | 6.24   | 1.20  |
| -8 | 7 | -5 | 5.56   | 1.22  |
| -8 | 7 | -5 | 6.40   | 1.28  |
| -8 | 7 | -5 | 4.65   | 1.24  |
| -8 | 7 | -5 | 5.91   | 1.16  |
| -8 | 7 | -4 | 696.86 | 10.36 |
| -8 | 7 | -4 | 706.67 | 11.08 |
| -8 | 7 | -4 | 704.95 | 10.77 |
| -8 | 7 | -3 | 105.73 | 4.46  |
| -8 | 7 | -3 | 111.06 | 3.70  |
| -8 | 7 | -3 | 117.52 | 3.97  |
| -8 | 7 | -2 | 8.03   | 1.19  |
| -8 | 7 | -2 | 5.82   | 1.91  |
| -8 | 7 | -2 | 7.38   | 1.09  |
| -8 | 7 | -2 | 8.24   | 1.26  |
| -8 | 7 | -1 | 30.04  | 1.93  |
| -8 | 7 | -1 | 25.92  | 3.01  |
| -8 | 7 | -1 | 28.17  | 1.91  |
| -8 | 7 | -1 | 29.31  | 3.08  |
| -8 | 7 | -1 | 26.43  | 1.80  |
| -8 | 7 | 0  | 224.41 | 6.87  |
| -8 | 7 | 0  | 226.27 | 6.28  |
| -8 | 7 | 0  | 234.47 | 7.45  |
| -8 | 7 | 0  | 222.19 | 5.35  |
| -8 | 7 | 0  | 219.33 | 6.62  |
| -8 | 7 | 0  | 209.91 | 7.35  |
| -8 | 7 | 0  | 207.54 | 7.29  |
| -8 | 7 | 0  | 220.78 | 5.99  |
| -8 | 7 | 0  | 215.80 | 4.87  |
| -8 | 7 | 0  | 205.83 | 7.75  |
| -8 | 7 | 0  | 230.43 | 5.21  |
| -8 | 7 | 1  | 2.02   | 1.17  |
| -8 | 7 | 1  | 1.23   | 1.59  |

## CIF 31

|    |   |   |        |      |
|----|---|---|--------|------|
| -8 | 7 | 1 | 0.89   | 1.00 |
| -8 | 7 | 1 | 0.95   | 0.82 |
| -8 | 7 | 1 | 2.55   | 1.36 |
| -8 | 7 | 1 | 0.87   | 1.40 |
| -8 | 7 | 1 | 0.60   | 0.71 |
| -8 | 7 | 1 | 0.88   | 1.08 |
| -8 | 7 | 1 | 0.93   | 1.04 |
| -8 | 7 | 1 | 1.09   | 1.36 |
| -8 | 7 | 1 | 1.15   | 1.33 |
| -8 | 7 | 2 | 20.97  | 1.70 |
| -8 | 7 | 2 | 18.80  | 2.30 |
| -8 | 7 | 2 | 18.33  | 2.08 |
| -8 | 7 | 2 | 22.94  | 1.74 |
| -8 | 7 | 2 | 20.20  | 2.44 |
| -8 | 7 | 2 | 21.78  | 2.17 |
| -8 | 7 | 2 | 15.79  | 2.11 |
| -8 | 7 | 2 | 20.15  | 2.58 |
| -8 | 7 | 2 | 20.31  | 2.40 |
| -8 | 7 | 2 | 20.97  | 2.11 |
| -8 | 7 | 2 | 20.87  | 2.25 |
| -8 | 7 | 3 | 24.89  | 2.49 |
| -8 | 7 | 3 | 29.61  | 2.80 |
| -8 | 7 | 3 | 23.40  | 2.36 |
| -8 | 7 | 3 | 30.23  | 2.01 |
| -8 | 7 | 3 | 23.96  | 2.74 |
| -8 | 7 | 3 | 19.08  | 2.71 |
| -8 | 7 | 3 | 28.12  | 2.71 |
| -8 | 7 | 3 | 29.08  | 1.98 |
| -8 | 7 | 3 | 32.80  | 2.34 |
| -8 | 7 | 3 | 22.61  | 2.35 |
| -8 | 7 | 3 | 26.59  | 2.44 |
| -8 | 7 | 3 | 21.08  | 2.21 |
| -8 | 7 | 4 | 110.22 | 3.84 |
| -8 | 7 | 4 | 117.69 | 4.28 |
| -8 | 7 | 4 | 109.46 | 4.77 |
| -8 | 7 | 4 | 108.14 | 4.94 |
| -8 | 7 | 4 | 112.01 | 4.12 |
| -8 | 7 | 4 | 98.64  | 5.34 |
| -8 | 7 | 4 | 104.14 | 4.67 |
| -8 | 7 | 4 | 115.45 | 5.40 |
| -8 | 7 | 4 | 114.54 | 3.88 |

## CIF 31

|    |   |   |        |      |
|----|---|---|--------|------|
| -8 | 7 | 4 | 113.30 | 4.98 |
| -8 | 7 | 4 | 107.73 | 5.10 |
| -8 | 7 | 4 | 118.50 | 4.62 |
| -8 | 7 | 5 | 306.88 | 7.29 |
| -8 | 7 | 5 | 332.16 | 8.67 |
| -8 | 7 | 5 | 303.96 | 6.53 |
| -8 | 7 | 5 | 291.80 | 6.91 |
| -8 | 7 | 5 | 288.29 | 8.05 |
| -8 | 7 | 5 | 317.68 | 7.90 |
| -8 | 7 | 5 | 342.31 | 8.53 |
| -8 | 7 | 5 | 282.64 | 8.24 |
| -8 | 7 | 5 | 293.74 | 6.49 |
| -8 | 7 | 5 | 323.17 | 8.48 |
| -8 | 7 | 5 | 327.77 | 9.20 |
| -8 | 7 | 6 | 2.54   | 1.26 |
| -8 | 7 | 6 | 3.40   | 1.52 |
| -8 | 7 | 6 | 2.72   | 1.31 |
| -8 | 7 | 6 | 4.69   | 1.09 |
| -8 | 7 | 6 | 3.67   | 1.50 |
| -8 | 7 | 6 | 3.35   | 1.44 |
| -8 | 7 | 6 | 1.71   | 0.83 |
| -8 | 7 | 6 | 1.99   | 1.26 |
| -8 | 7 | 6 | 2.19   | 1.31 |
| -8 | 7 | 6 | 2.03   | 1.14 |
| -8 | 7 | 7 | 99.78  | 4.88 |
| -8 | 7 | 7 | 100.49 | 4.41 |
| -8 | 7 | 7 | 98.35  | 4.12 |
| -8 | 7 | 7 | 94.91  | 4.57 |
| -8 | 7 | 7 | 101.93 | 4.39 |
| -8 | 7 | 7 | 86.11  | 4.08 |
| -8 | 7 | 7 | 83.19  | 4.30 |
| -8 | 7 | 7 | 96.23  | 3.50 |
| -8 | 7 | 7 | 94.85  | 3.68 |
| -8 | 7 | 7 | 90.55  | 3.72 |
| -8 | 7 | 7 | 97.42  | 3.60 |
| -8 | 7 | 7 | 88.82  | 4.34 |
| -8 | 7 | 8 | 242.49 | 6.68 |
| -8 | 7 | 8 | 216.54 | 6.90 |
| -8 | 7 | 8 | 226.76 | 6.66 |
| -8 | 7 | 8 | 244.17 | 6.36 |
| -8 | 7 | 8 | 208.43 | 6.02 |

## CIF 31

|    |   |    |        |      |
|----|---|----|--------|------|
| -8 | 7 | 8  | 230.32 | 5.55 |
| -8 | 7 | 8  | 224.49 | 5.55 |
| -8 | 7 | 8  | 223.07 | 6.50 |
| -8 | 7 | 8  | 187.03 | 5.58 |
| -8 | 7 | 9  | 27.85  | 1.93 |
| -8 | 7 | 9  | 28.81  | 2.17 |
| -8 | 7 | 9  | 25.10  | 2.20 |
| -8 | 7 | 9  | 23.53  | 2.34 |
| -8 | 7 | 9  | 22.54  | 1.97 |
| -8 | 7 | 9  | 24.00  | 1.66 |
| -8 | 7 | 9  | 27.75  | 2.28 |
| -8 | 7 | 9  | 25.10  | 2.16 |
| -8 | 7 | 10 | 146.03 | 3.86 |
| -8 | 7 | 10 | 122.88 | 4.18 |
| -8 | 7 | 10 | 139.70 | 4.18 |
| -8 | 7 | 10 | 123.46 | 3.94 |
| -8 | 7 | 10 | 140.54 | 4.31 |
| -8 | 7 | 10 | 123.67 | 3.27 |
| -8 | 7 | 11 | 39.75  | 2.06 |
| -8 | 7 | 11 | 33.27  | 1.79 |
| -8 | 7 | 11 | 35.69  | 1.65 |
| -8 | 7 | 11 | 35.49  | 1.86 |
| -8 | 8 | -8 | 3.87   | 0.79 |
| -8 | 8 | -8 | 3.10   | 0.74 |
| -8 | 8 | -8 | 1.30   | 2.48 |
| -8 | 8 | -8 | 3.66   | 1.87 |
| -8 | 8 | -7 | 172.29 | 4.04 |
| -8 | 8 | -7 | 161.88 | 4.07 |
| -8 | 8 | -6 | 139.61 | 3.99 |
| -8 | 8 | -6 | 132.49 | 3.70 |
| -8 | 8 | -6 | 134.64 | 3.89 |
| -8 | 8 | -6 | 124.16 | 3.16 |
| -8 | 8 | -5 | 444.75 | 7.76 |
| -8 | 8 | -5 | 438.21 | 7.30 |
| -8 | 8 | -5 | 433.25 | 7.64 |
| -8 | 8 | -4 | 63.93  | 2.50 |
| -8 | 8 | -4 | 67.65  | 2.98 |
| -8 | 8 | -4 | 60.87  | 4.13 |
| -8 | 8 | -4 | 63.93  | 2.91 |
| -8 | 8 | -4 | 65.39  | 2.72 |
| -8 | 8 | -4 | 59.94  | 3.10 |

## CIF 31

|    |   |    |        |       |
|----|---|----|--------|-------|
| -8 | 8 | -3 | 155.94 | 4.50  |
| -8 | 8 | -3 | 143.61 | 4.37  |
| -8 | 8 | -3 | 127.20 | 3.90  |
| -8 | 8 | -3 | 144.43 | 3.98  |
| -8 | 8 | -3 | 135.29 | 3.73  |
| -8 | 8 | -2 | 533.27 | 8.07  |
| -8 | 8 | -2 | 522.86 | 12.22 |
| -8 | 8 | -2 | 528.47 | 8.79  |
| -8 | 8 | -2 | 541.17 | 8.90  |
| -8 | 8 | -1 | 108.86 | 5.29  |
| -8 | 8 | -1 | 110.98 | 4.38  |
| -8 | 8 | -1 | 113.48 | 5.05  |
| -8 | 8 | -1 | 110.48 | 4.47  |
| -8 | 8 | -1 | 119.80 | 3.70  |
| -8 | 8 | -1 | 107.66 | 5.57  |
| -8 | 8 | -1 | 113.13 | 3.79  |
| -8 | 8 | 0  | 103.46 | 4.58  |
| -8 | 8 | 0  | 102.16 | 5.10  |
| -8 | 8 | 0  | 103.21 | 5.13  |
| -8 | 8 | 0  | 100.93 | 5.44  |
| -8 | 8 | 0  | 111.73 | 3.79  |
| -8 | 8 | 0  | 99.16  | 3.19  |
| -8 | 8 | 0  | 103.53 | 5.00  |
| -8 | 8 | 0  | 108.19 | 4.54  |
| -8 | 8 | 1  | 51.01  | 2.63  |
| -8 | 8 | 1  | 57.00  | 3.72  |
| -8 | 8 | 1  | 60.22  | 3.72  |
| -8 | 8 | 1  | 57.16  | 3.05  |
| -8 | 8 | 1  | 54.51  | 3.34  |
| -8 | 8 | 1  | 59.90  | 3.88  |
| -8 | 8 | 1  | 58.11  | 3.74  |
| -8 | 8 | 1  | 54.31  | 3.11  |
| -8 | 8 | 2  | 33.45  | 2.51  |
| -8 | 8 | 2  | 32.14  | 2.84  |
| -8 | 8 | 2  | 30.45  | 2.88  |
| -8 | 8 | 2  | 30.43  | 2.69  |
| -8 | 8 | 2  | 28.81  | 2.63  |
| -8 | 8 | 2  | 33.26  | 2.49  |
| -8 | 8 | 2  | 31.69  | 2.89  |
| -8 | 8 | 2  | 31.64  | 2.79  |
| -8 | 8 | 2  | 29.41  | 2.07  |



## CIF 31

|    |   |   |        |      |
|----|---|---|--------|------|
| -8 | 8 | 2 | 30.94  | 3.30 |
| -8 | 8 | 2 | 29.80  | 2.00 |
| -8 | 8 | 2 | 32.45  | 2.51 |
| -8 | 8 | 3 | 21.81  | 2.22 |
| -8 | 8 | 3 | 21.56  | 2.20 |
| -8 | 8 | 3 | 21.63  | 2.54 |
| -8 | 8 | 3 | 21.71  | 2.35 |
| -8 | 8 | 3 | 20.58  | 2.11 |
| -8 | 8 | 3 | 23.83  | 1.82 |
| -8 | 8 | 3 | 23.73  | 2.28 |
| -8 | 8 | 3 | 21.01  | 1.80 |
| -8 | 8 | 3 | 26.73  | 2.54 |
| -8 | 8 | 3 | 20.68  | 2.79 |
| -8 | 8 | 3 | 24.04  | 2.54 |
| -8 | 8 | 4 | 251.72 | 7.80 |
| -8 | 8 | 4 | 250.67 | 7.44 |
| -8 | 8 | 4 | 218.40 | 6.47 |
| -8 | 8 | 4 | 245.57 | 7.63 |
| -8 | 8 | 4 | 241.42 | 5.94 |
| -8 | 8 | 4 | 246.68 | 6.50 |
| -8 | 8 | 4 | 208.37 | 7.57 |
| -8 | 8 | 4 | 260.97 | 7.56 |
| -8 | 8 | 4 | 245.49 | 6.99 |
| -8 | 8 | 4 | 245.17 | 7.18 |
| -8 | 8 | 4 | 227.98 | 6.75 |
| -8 | 8 | 5 | 2.11   | 1.35 |
| -8 | 8 | 5 | 2.68   | 1.30 |
| -8 | 8 | 5 | 2.43   | 0.86 |
| -8 | 8 | 5 | 2.42   | 0.97 |
| -8 | 8 | 5 | 2.40   | 0.88 |
| -8 | 8 | 5 | 2.49   | 1.17 |
| -8 | 8 | 5 | 3.91   | 1.42 |
| -8 | 8 | 5 | 2.47   | 1.82 |
| -8 | 8 | 5 | 4.47   | 1.49 |
| -8 | 8 | 5 | 3.21   | 1.03 |
| -8 | 8 | 6 | 242.07 | 6.56 |
| -8 | 8 | 6 | 246.72 | 5.77 |
| -8 | 8 | 6 | 233.15 | 5.38 |
| -8 | 8 | 6 | 241.82 | 7.12 |
| -8 | 8 | 6 | 236.79 | 6.33 |
| -8 | 8 | 6 | 245.19 | 5.84 |

## CIF 31

|    |   |    |        |      |
|----|---|----|--------|------|
| -8 | 8 | 6  | 243.06 | 6.07 |
| -8 | 8 | 6  | 236.05 | 6.94 |
| -8 | 8 | 6  | 258.60 | 7.13 |
| -8 | 8 | 6  | 233.68 | 6.89 |
| -8 | 8 | 7  | 197.98 | 6.45 |
| -8 | 8 | 7  | 186.74 | 5.94 |
| -8 | 8 | 7  | 182.46 | 4.77 |
| -8 | 8 | 7  | 194.62 | 5.31 |
| -8 | 8 | 7  | 175.43 | 5.65 |
| -8 | 8 | 7  | 188.29 | 5.79 |
| -8 | 8 | 7  | 200.42 | 6.20 |
| -8 | 8 | 7  | 197.14 | 6.00 |
| -8 | 8 | 7  | 197.94 | 5.81 |
| -8 | 8 | 8  | 4.61   | 1.34 |
| -8 | 8 | 8  | 2.03   | 1.20 |
| -8 | 8 | 8  | 2.48   | 0.98 |
| -8 | 8 | 8  | 1.92   | 0.99 |
| -8 | 8 | 8  | 4.06   | 1.15 |
| -8 | 8 | 8  | 1.85   | 1.15 |
| -8 | 8 | 8  | 2.97   | 1.11 |
| -8 | 8 | 8  | 3.21   | 1.29 |
| -8 | 8 | 9  | 28.47  | 1.89 |
| -8 | 8 | 9  | 24.66  | 2.05 |
| -8 | 8 | 9  | 27.03  | 2.09 |
| -8 | 8 | 9  | 27.49  | 1.97 |
| -8 | 8 | 9  | 26.58  | 2.09 |
| -8 | 8 | 10 | 0.98   | 0.61 |
| -8 | 8 | 10 | 2.01   | 0.78 |
| -8 | 9 | -8 | 4.68   | 1.81 |
| -8 | 9 | -8 | 4.63   | 0.74 |
| -8 | 9 | -7 | 315.94 | 5.65 |
| -8 | 9 | -6 | 268.73 | 5.37 |
| -8 | 9 | -6 | 249.58 | 4.65 |
| -8 | 9 | -5 | 82.40  | 3.08 |
| -8 | 9 | -4 | 6.24   | 1.23 |
| -8 | 9 | -4 | 8.69   | 2.05 |
| -8 | 9 | -4 | 7.66   | 1.36 |
| -8 | 9 | -3 | 8.83   | 1.22 |
| -8 | 9 | -3 | 6.41   | 1.08 |
| -8 | 9 | -3 | 6.48   | 1.71 |
| -8 | 9 | -2 | 29.27  | 1.79 |

## CIF 31

|    |   |    |        |      |
|----|---|----|--------|------|
| -8 | 9 | -2 | 31.42  | 3.08 |
| -8 | 9 | -2 | 27.20  | 2.78 |
| -8 | 9 | -2 | 29.90  | 2.00 |
| -8 | 9 | -2 | 25.52  | 2.85 |
| -8 | 9 | -1 | 12.16  | 1.66 |
| -8 | 9 | -1 | 14.10  | 2.41 |
| -8 | 9 | -1 | 14.54  | 2.20 |
| -8 | 9 | -1 | 12.95  | 1.42 |
| -8 | 9 | -1 | 12.05  | 1.84 |
| -8 | 9 | 0  | 28.62  | 2.84 |
| -8 | 9 | 0  | 32.81  | 2.66 |
| -8 | 9 | 0  | 40.48  | 2.33 |
| -8 | 9 | 0  | 36.04  | 3.18 |
| -8 | 9 | 0  | 29.43  | 3.20 |
| -8 | 9 | 0  | 38.61  | 2.65 |
| -8 | 9 | 0  | 39.64  | 3.08 |
| -8 | 9 | 1  | 28.12  | 1.97 |
| -8 | 9 | 1  | 28.89  | 2.73 |
| -8 | 9 | 1  | 28.46  | 2.37 |
| -8 | 9 | 1  | 26.48  | 2.58 |
| -8 | 9 | 1  | 28.45  | 2.49 |
| -8 | 9 | 1  | 27.55  | 2.70 |
| -8 | 9 | 1  | 24.12  | 2.63 |
| -8 | 9 | 2  | 183.25 | 5.33 |
| -8 | 9 | 2  | 181.02 | 6.39 |
| -8 | 9 | 2  | 165.83 | 5.97 |
| -8 | 9 | 2  | 165.49 | 6.85 |
| -8 | 9 | 2  | 194.81 | 5.01 |
| -8 | 9 | 2  | 185.95 | 6.39 |
| -8 | 9 | 2  | 179.99 | 5.05 |
| -8 | 9 | 2  | 201.84 | 6.31 |
| -8 | 9 | 2  | 179.74 | 5.51 |
| -8 | 9 | 2  | 187.63 | 6.14 |
| -8 | 9 | 2  | 170.98 | 5.77 |
| -8 | 9 | 3  | 37.11  | 2.94 |
| -8 | 9 | 3  | 35.05  | 2.51 |
| -8 | 9 | 3  | 34.93  | 2.62 |
| -8 | 9 | 3  | 30.27  | 3.09 |
| -8 | 9 | 3  | 32.48  | 2.63 |
| -8 | 9 | 3  | 35.09  | 2.26 |
| -8 | 9 | 3  | 34.91  | 2.45 |

## CIF 31

|    |   |   |        |      |
|----|---|---|--------|------|
| -8 | 9 | 3 | 37.50  | 2.88 |
| -8 | 9 | 3 | 37.80  | 3.08 |
| -8 | 9 | 4 | 141.23 | 5.30 |
| -8 | 9 | 4 | 137.24 | 4.06 |
| -8 | 9 | 4 | 134.62 | 4.25 |
| -8 | 9 | 4 | 116.03 | 4.42 |
| -8 | 9 | 4 | 127.23 | 4.69 |
| -8 | 9 | 4 | 128.09 | 5.27 |
| -8 | 9 | 4 | 136.15 | 4.74 |
| -8 | 9 | 4 | 130.09 | 5.13 |
| -8 | 9 | 4 | 134.39 | 5.46 |
| -8 | 9 | 4 | 131.46 | 4.93 |
| -8 | 9 | 4 | 107.30 | 5.09 |
| -8 | 9 | 5 | 22.95  | 2.32 |
| -8 | 9 | 5 | 23.01  | 2.26 |
| -8 | 9 | 5 | 30.91  | 2.49 |
| -8 | 9 | 5 | 26.03  | 2.03 |
| -8 | 9 | 5 | 29.02  | 2.83 |
| -8 | 9 | 5 | 26.02  | 2.26 |
| -8 | 9 | 5 | 26.23  | 2.26 |
| -8 | 9 | 6 | 126.50 | 4.72 |
| -8 | 9 | 6 | 118.64 | 4.69 |
| -8 | 9 | 6 | 127.31 | 4.55 |
| -8 | 9 | 6 | 116.08 | 3.83 |
| -8 | 9 | 6 | 126.87 | 4.62 |
| -8 | 9 | 6 | 131.70 | 4.57 |
| -8 | 9 | 6 | 135.29 | 4.38 |
| -8 | 9 | 6 | 114.72 | 4.89 |
| -8 | 9 | 7 | 380.71 | 8.02 |
| -8 | 9 | 7 | 404.01 | 6.74 |
| -8 | 9 | 7 | 427.79 | 8.12 |
| -8 | 9 | 7 | 394.16 | 8.17 |
| -8 | 9 | 7 | 376.27 | 8.51 |
| -8 | 9 | 7 | 405.56 | 8.03 |
| -8 | 9 | 7 | 350.44 | 7.48 |
| -8 | 9 | 7 | 414.58 | 8.03 |
| -8 | 9 | 7 | 405.79 | 7.66 |
| -8 | 9 | 8 | 352.97 | 6.85 |
| -8 | 9 | 8 | 383.54 | 7.12 |
| -8 | 9 | 8 | 334.11 | 6.96 |
| -8 | 9 | 8 | 371.45 | 6.73 |

## CIF 31

|    |    |    |        |      |
|----|----|----|--------|------|
| -8 | 9  | 8  | 331.67 | 5.71 |
| -8 | 9  | 8  | 336.09 | 7.05 |
| -8 | 9  | 9  | 24.67  | 1.58 |
| -8 | 9  | 9  | 24.82  | 1.61 |
| -8 | 10 | -7 | 54.44  | 1.86 |
| -8 | 10 | -7 | 53.82  | 2.33 |
| -8 | 10 | -6 | 12.72  | 1.91 |
| -8 | 10 | -6 | 11.76  | 1.12 |
| -8 | 10 | -5 | 33.23  | 2.08 |
| -8 | 10 | -5 | 36.23  | 1.90 |
| -8 | 10 | -5 | 35.68  | 2.61 |
| -8 | 10 | -4 | 197.89 | 4.12 |
| -8 | 10 | -4 | 181.42 | 4.93 |
| -8 | 10 | -3 | 15.56  | 2.21 |
| -8 | 10 | -3 | 13.03  | 1.15 |
| -8 | 10 | -3 | 12.52  | 1.99 |
| -8 | 10 | -3 | 14.48  | 1.45 |
| -8 | 10 | -2 | 2.48   | 1.48 |
| -8 | 10 | -2 | 2.81   | 1.49 |
| -8 | 10 | -2 | 3.03   | 1.60 |
| -8 | 10 | -2 | 1.15   | 0.86 |
| -8 | 10 | -1 | 1.63   | 1.09 |
| -8 | 10 | -1 | 2.51   | 1.49 |
| -8 | 10 | -1 | 2.11   | 1.61 |
| -8 | 10 | -1 | 5.81   | 1.64 |
| -8 | 10 | 0  | 155.18 | 5.66 |
| -8 | 10 | 0  | 151.44 | 6.19 |
| -8 | 10 | 0  | 159.51 | 5.55 |
| -8 | 10 | 0  | 151.51 | 5.13 |
| -8 | 10 | 0  | 151.42 | 5.64 |
| -8 | 10 | 1  | 8.86   | 1.64 |
| -8 | 10 | 1  | 7.84   | 1.60 |
| -8 | 10 | 1  | 8.02   | 1.55 |
| -8 | 10 | 1  | 7.17   | 1.64 |
| -8 | 10 | 1  | 10.52  | 1.52 |
| -8 | 10 | 2  | 315.16 | 7.48 |
| -8 | 10 | 2  | 251.98 | 6.38 |
| -8 | 10 | 2  | 273.01 | 8.16 |
| -8 | 10 | 2  | 272.61 | 7.38 |
| -8 | 10 | 2  | 251.12 | 6.99 |
| -8 | 10 | 2  | 285.14 | 7.64 |

## CIF 31

|    |    |    |        |      |
|----|----|----|--------|------|
| -8 | 10 | 2  | 295.34 | 7.15 |
| -8 | 10 | 3  | 2.83   | 1.38 |
| -8 | 10 | 3  | 2.68   | 1.28 |
| -8 | 10 | 3  | 1.72   | 1.25 |
| -8 | 10 | 3  | 1.53   | 0.89 |
| -8 | 10 | 3  | 1.54   | 0.89 |
| -8 | 10 | 3  | 2.26   | 1.08 |
| -8 | 10 | 3  | 1.84   | 1.12 |
| -8 | 10 | 3  | 1.73   | 1.41 |
| -8 | 10 | 4  | 124.17 | 3.83 |
| -8 | 10 | 4  | 123.61 | 4.05 |
| -8 | 10 | 4  | 122.41 | 4.50 |
| -8 | 10 | 4  | 120.59 | 4.20 |
| -8 | 10 | 4  | 106.37 | 4.55 |
| -8 | 10 | 4  | 116.36 | 4.70 |
| -8 | 10 | 4  | 129.58 | 4.67 |
| -8 | 10 | 4  | 120.08 | 4.71 |
| -8 | 10 | 5  | 15.26  | 1.87 |
| -8 | 10 | 5  | 18.30  | 1.73 |
| -8 | 10 | 5  | 16.52  | 2.04 |
| -8 | 10 | 5  | 16.80  | 1.83 |
| -8 | 10 | 5  | 19.87  | 1.73 |
| -8 | 10 | 5  | 18.52  | 1.81 |
| -8 | 10 | 5  | 19.73  | 1.66 |
| -8 | 10 | 5  | 14.74  | 1.48 |
| -8 | 10 | 6  | 325.91 | 6.34 |
| -8 | 10 | 6  | 310.43 | 6.63 |
| -8 | 10 | 6  | 310.21 | 6.50 |
| -8 | 10 | 6  | 309.86 | 6.07 |
| -8 | 10 | 7  | 55.13  | 2.24 |
| -8 | 10 | 7  | 59.38  | 2.41 |
| -8 | 10 | 8  | 45.67  | 1.80 |
| -8 | 11 | -6 | 312.60 | 4.53 |
| -8 | 11 | -5 | 10.48  | 0.97 |
| -8 | 11 | -4 | 53.41  | 2.31 |
| -8 | 11 | -4 | 67.18  | 2.24 |
| -8 | 11 | -3 | 69.28  | 3.42 |
| -8 | 11 | -3 | 76.10  | 3.62 |
| -8 | 11 | -2 | 31.72  | 2.54 |
| -8 | 11 | -2 | 35.20  | 2.73 |
| -8 | 11 | -1 | 10.78  | 1.65 |

## CIF 31

|    |    |    |        |      |
|----|----|----|--------|------|
| -8 | 11 | -1 | 10.68  | 1.91 |
| -8 | 11 | -1 | 10.15  | 1.17 |
| -8 | 11 | -1 | 11.32  | 1.77 |
| -8 | 11 | -1 | 10.29  | 1.39 |
| -8 | 11 | 0  | -0.04  | 0.85 |
| -8 | 11 | 0  | 2.52   | 1.12 |
| -8 | 11 | 0  | -0.05  | 1.12 |
| -8 | 11 | 0  | 0.33   | 0.86 |
| -8 | 11 | 1  | 36.28  | 2.27 |
| -8 | 11 | 1  | 40.52  | 2.63 |
| -8 | 11 | 1  | 43.05  | 3.11 |
| -8 | 11 | 1  | 47.18  | 2.78 |
| -8 | 11 | 1  | 44.01  | 2.67 |
| -8 | 11 | 2  | 59.90  | 3.11 |
| -8 | 11 | 2  | 65.36  | 3.22 |
| -8 | 11 | 2  | 56.08  | 3.33 |
| -8 | 11 | 2  | 57.81  | 2.94 |
| -8 | 11 | 3  | 3.58   | 1.07 |
| -8 | 11 | 3  | 3.67   | 1.08 |
| -8 | 11 | 3  | 2.32   | 1.13 |
| -8 | 11 | 3  | 2.12   | 1.16 |
| -8 | 11 | 4  | 63.58  | 3.04 |
| -8 | 11 | 4  | 62.12  | 2.77 |
| -8 | 11 | 5  | 49.38  | 1.79 |
| -8 | 11 | 6  | 19.35  | 1.46 |
| -8 | 12 | -4 | 2.41   | 0.44 |
| -8 | 12 | -3 | 136.34 | 2.64 |
| -8 | 12 | -3 | 125.18 | 3.77 |
| -8 | 12 | -2 | 13.36  | 1.39 |
| -8 | 12 | -2 | 11.49  | 1.46 |
| -8 | 12 | -2 | 13.63  | 0.93 |
| -8 | 12 | -1 | 33.86  | 2.31 |
| -8 | 12 | -1 | 30.51  | 1.87 |
| -8 | 12 | 0  | 118.35 | 2.55 |
| -8 | 12 | 0  | 74.55  | 2.55 |
| -8 | 12 | 1  | 3.24   | 0.58 |
| -8 | 12 | 1  | 2.26   | 1.01 |
| -8 | 12 | 1  | 2.00   | 0.79 |
| -8 | 12 | 2  | 216.84 | 4.77 |
| -8 | 12 | 3  | 7.79   | 1.03 |
| -7 | -7 | 2  | 0.82   | 0.50 |

## CIF 31

|    |    |    |        |      |
|----|----|----|--------|------|
| -7 | -7 | 3  | 179.65 | 3.21 |
| -7 | -7 | 3  | 190.02 | 3.49 |
| -7 | -7 | 4  | 19.35  | 1.15 |
| -7 | -7 | 4  | 20.13  | 1.17 |
| -7 | -7 | 5  | 273.30 | 4.36 |
| -7 | -7 | 5  | 258.12 | 5.39 |
| -7 | -7 | 6  | 6.83   | 1.07 |
| -7 | -7 | 6  | 6.12   | 1.03 |
| -7 | -7 | 7  | 39.98  | 2.05 |
| -7 | -7 | 7  | 39.29  | 2.06 |
| -7 | -7 | 7  | 38.94  | 1.83 |
| -7 | -7 | 8  | 42.25  | 1.57 |
| -7 | -7 | 8  | 37.54  | 1.91 |
| -7 | -7 | 8  | 37.44  | 1.75 |
| -7 | -7 | 8  | 34.63  | 1.90 |
| -7 | -7 | 9  | 10.53  | 0.75 |
| -7 | -7 | 9  | 14.03  | 1.20 |
| -7 | -7 | 9  | 11.91  | 0.99 |
| -7 | -7 | 9  | 14.36  | 1.22 |
| -7 | -7 | 10 | 38.76  | 1.50 |
| -7 | -7 | 10 | 47.12  | 1.81 |
| -7 | -6 | -1 | 2.19   | 0.56 |
| -7 | -6 | -1 | 2.36   | 0.52 |
| -7 | -6 | 0  | 357.95 | 5.50 |
| -7 | -6 | 0  | 347.99 | 5.19 |
| -7 | -6 | 1  | 0.45   | 0.60 |
| -7 | -6 | 1  | 0.37   | 0.44 |
| -7 | -6 | 2  | 287.10 | 4.92 |
| -7 | -6 | 2  | 281.54 | 4.79 |
| -7 | -6 | 3  | 276.38 | 5.00 |
| -7 | -6 | 3  | 227.75 | 5.64 |
| -7 | -6 | 3  | 260.03 | 5.04 |
| -7 | -6 | 3  | 238.50 | 4.27 |
| -7 | -6 | 4  | 80.94  | 2.69 |
| -7 | -6 | 4  | 82.01  | 2.76 |
| -7 | -6 | 4  | 74.01  | 3.29 |
| -7 | -6 | 4  | 84.91  | 3.48 |
| -7 | -6 | 5  | 233.75 | 5.48 |
| -7 | -6 | 5  | 236.82 | 5.98 |
| -7 | -6 | 5  | 238.64 | 6.00 |
| -7 | -6 | 6  | 330.87 | 6.69 |



## CIF 31

|    |    |    |        |      |
|----|----|----|--------|------|
| -7 | -6 | 6  | 338.43 | 7.27 |
| -7 | -6 | 6  | 329.42 | 7.29 |
| -7 | -6 | 7  | 13.77  | 1.60 |
| -7 | -6 | 7  | 13.07  | 1.50 |
| -7 | -6 | 7  | 11.27  | 1.22 |
| -7 | -6 | 7  | 12.73  | 1.66 |
| -7 | -6 | 7  | 12.44  | 1.53 |
| -7 | -6 | 7  | 8.92   | 0.85 |
| -7 | -6 | 7  | 12.72  | 1.61 |
| -7 | -6 | 8  | 36.67  | 2.29 |
| -7 | -6 | 8  | 30.35  | 2.02 |
| -7 | -6 | 8  | 32.12  | 2.03 |
| -7 | -6 | 8  | 34.48  | 2.27 |
| -7 | -6 | 8  | 36.66  | 1.79 |
| -7 | -6 | 8  | 35.47  | 2.28 |
| -7 | -6 | 8  | 34.60  | 2.31 |
| -7 | -6 | 9  | 36.83  | 2.22 |
| -7 | -6 | 9  | 37.20  | 2.20 |
| -7 | -6 | 9  | 38.53  | 2.09 |
| -7 | -6 | 9  | 40.10  | 2.31 |
| -7 | -6 | 9  | 38.84  | 1.69 |
| -7 | -6 | 9  | 33.30  | 1.85 |
| -7 | -6 | 10 | 26.39  | 1.16 |
| -7 | -6 | 10 | 21.49  | 1.56 |
| -7 | -6 | 10 | 26.28  | 1.66 |
| -7 | -6 | 10 | 25.84  | 1.80 |
| -7 | -6 | 11 | 30.24  | 1.79 |
| -7 | -6 | 11 | 32.20  | 1.62 |
| -7 | -6 | 12 | 6.17   | 0.70 |
| -7 | -6 | 12 | 5.44   | 0.77 |
| -7 | -5 | -3 | 0.40   | 0.42 |
| -7 | -5 | -3 | 0.43   | 0.48 |
| -7 | -5 | -2 | 106.58 | 2.79 |
| -7 | -5 | -2 | 105.81 | 2.77 |
| -7 | -5 | -1 | 7.90   | 1.02 |
| -7 | -5 | -1 | 8.66   | 1.09 |
| -7 | -5 | 0  | 61.77  | 2.42 |
| -7 | -5 | 1  | 52.89  | 2.44 |
| -7 | -5 | 1  | 52.58  | 2.12 |
| -7 | -5 | 1  | 53.24  | 2.30 |
| -7 | -5 | 2  | 250.74 | 5.12 |

## CIF 31

|    |    |    |        |      |
|----|----|----|--------|------|
| -7 | -5 | 2  | 243.16 | 5.37 |
| -7 | -5 | 3  | 398.76 | 8.53 |
| -7 | -5 | 3  | 428.47 | 7.41 |
| -7 | -5 | 3  | 412.37 | 8.49 |
| -7 | -5 | 4  | 105.56 | 4.22 |
| -7 | -5 | 4  | 112.80 | 4.67 |
| -7 | -5 | 4  | 104.11 | 4.30 |
| -7 | -5 | 4  | 97.63  | 3.80 |
| -7 | -5 | 5  | 15.35  | 1.97 |
| -7 | -5 | 5  | 16.32  | 1.89 |
| -7 | -5 | 5  | 13.33  | 1.63 |
| -7 | -5 | 5  | 13.63  | 1.84 |
| -7 | -5 | 5  | 16.22  | 1.41 |
| -7 | -5 | 6  | 0.05   | 1.14 |
| -7 | -5 | 6  | 0.33   | 1.26 |
| -7 | -5 | 6  | 0.57   | 1.11 |
| -7 | -5 | 6  | 1.01   | 1.02 |
| -7 | -5 | 6  | 1.46   | 0.73 |
| -7 | -5 | 6  | 0.47   | 1.04 |
| -7 | -5 | 6  | 0.87   | 1.12 |
| -7 | -5 | 7  | 1.07   | 1.23 |
| -7 | -5 | 7  | 0.28   | 0.99 |
| -7 | -5 | 7  | 0.10   | 1.11 |
| -7 | -5 | 7  | 0.51   | 1.08 |
| -7 | -5 | 7  | 0.10   | 1.16 |
| -7 | -5 | 7  | -0.05  | 0.81 |
| -7 | -5 | 7  | 0.79   | 0.57 |
| -7 | -5 | 8  | 88.43  | 3.55 |
| -7 | -5 | 8  | 84.17  | 3.76 |
| -7 | -5 | 8  | 87.55  | 3.87 |
| -7 | -5 | 8  | 94.90  | 3.56 |
| -7 | -5 | 8  | 86.12  | 3.69 |
| -7 | -5 | 8  | 84.20  | 3.96 |
| -7 | -5 | 9  | 204.21 | 5.32 |
| -7 | -5 | 9  | 197.96 | 5.69 |
| -7 | -5 | 9  | 197.87 | 5.10 |
| -7 | -5 | 9  | 210.71 | 4.46 |
| -7 | -5 | 9  | 198.48 | 5.61 |
| -7 | -5 | 9  | 204.98 | 5.57 |
| -7 | -5 | 9  | 190.94 | 5.40 |
| -7 | -5 | 10 | 36.91  | 2.29 |

## CIF 31

|    |    |    |        |       |
|----|----|----|--------|-------|
| -7 | -5 | 10 | 44.99  | 2.43  |
| -7 | -5 | 10 | 46.88  | 1.80  |
| -7 | -5 | 10 | 43.82  | 2.59  |
| -7 | -5 | 10 | 44.55  | 2.58  |
| -7 | -5 | 10 | 47.57  | 2.58  |
| -7 | -5 | 10 | 44.01  | 2.44  |
| -7 | -5 | 11 | 36.01  | 1.92  |
| -7 | -5 | 11 | 40.77  | 2.15  |
| -7 | -5 | 11 | 38.14  | 2.19  |
| -7 | -5 | 11 | 42.77  | 2.32  |
| -7 | -5 | 12 | 2.08   | 0.82  |
| -7 | -5 | 12 | 1.62   | 0.63  |
| -7 | -5 | 12 | 2.09   | 0.76  |
| -7 | -5 | 13 | 22.10  | 1.36  |
| -7 | -5 | 13 | 22.68  | 1.20  |
| -7 | -4 | -4 | 0.76   | 0.54  |
| -7 | -4 | -4 | 0.49   | 0.63  |
| -7 | -4 | -3 | 13.82  | 1.24  |
| -7 | -4 | -3 | 14.10  | 1.22  |
| -7 | -4 | -2 | 202.62 | 4.63  |
| -7 | -4 | -2 | 207.67 | 4.71  |
| -7 | -4 | -1 | 71.92  | 2.83  |
| -7 | -4 | -1 | 69.40  | 2.92  |
| -7 | -4 | 0  | 54.49  | 2.56  |
| -7 | -4 | 0  | 52.52  | 2.21  |
| -7 | -4 | 1  | 753.09 | 10.58 |
| -7 | -4 | 1  | 752.47 | 10.71 |
| -7 | -4 | 2  | 99.53  | 3.35  |
| -7 | -4 | 2  | 103.05 | 4.27  |
| -7 | -4 | 2  | 110.45 | 3.76  |
| -7 | -4 | 2  | 112.18 | 4.41  |
| -7 | -4 | 3  | 738.18 | 13.50 |
| -7 | -4 | 3  | 729.82 | 12.46 |
| -7 | -4 | 3  | 759.27 | 12.55 |
| -7 | -4 | 3  | 713.60 | 11.51 |
| -7 | -4 | 3  | 726.86 | 10.11 |
| -7 | -4 | 4  | 37.84  | 3.12  |
| -7 | -4 | 4  | 42.22  | 2.85  |
| -7 | -4 | 4  | 36.81  | 2.44  |
| -7 | -4 | 4  | 40.32  | 3.21  |
| -7 | -4 | 4  | 37.15  | 2.69  |

## CIF 31

|    |    |    |        |      |
|----|----|----|--------|------|
| -7 | -4 | 4  | 40.97  | 2.28 |
| -7 | -4 | 4  | 41.18  | 2.85 |
| -7 | -4 | 5  | 16.68  | 1.87 |
| -7 | -4 | 5  | 15.70  | 2.24 |
| -7 | -4 | 5  | 17.90  | 1.53 |
| -7 | -4 | 5  | 17.21  | 1.98 |
| -7 | -4 | 5  | 20.68  | 2.19 |
| -7 | -4 | 5  | 17.96  | 1.82 |
| -7 | -4 | 6  | 47.78  | 2.83 |
| -7 | -4 | 6  | 46.33  | 2.99 |
| -7 | -4 | 6  | 55.47  | 2.35 |
| -7 | -4 | 6  | 50.21  | 3.01 |
| -7 | -4 | 6  | 47.86  | 3.34 |
| -7 | -4 | 7  | 391.38 | 8.16 |
| -7 | -4 | 7  | 372.16 | 8.29 |
| -7 | -4 | 7  | 392.37 | 9.15 |
| -7 | -4 | 7  | 390.51 | 8.68 |
| -7 | -4 | 7  | 406.98 | 9.37 |
| -7 | -4 | 7  | 369.56 | 6.97 |
| -7 | -4 | 7  | 361.45 | 8.23 |
| -7 | -4 | 7  | 401.55 | 8.16 |
| -7 | -4 | 8  | 15.70  | 2.00 |
| -7 | -4 | 8  | 15.10  | 1.81 |
| -7 | -4 | 8  | 13.75  | 1.66 |
| -7 | -4 | 8  | 14.81  | 2.12 |
| -7 | -4 | 8  | 13.44  | 1.67 |
| -7 | -4 | 8  | 16.93  | 1.55 |
| -7 | -4 | 8  | 13.47  | 1.94 |
| -7 | -4 | 8  | 13.18  | 1.74 |
| -7 | -4 | 8  | 14.63  | 1.45 |
| -7 | -4 | 9  | 3.12   | 0.92 |
| -7 | -4 | 9  | 3.59   | 1.27 |
| -7 | -4 | 9  | 3.02   | 0.89 |
| -7 | -4 | 9  | 2.47   | 1.10 |
| -7 | -4 | 9  | 2.56   | 1.25 |
| -7 | -4 | 9  | 2.00   | 1.29 |
| -7 | -4 | 9  | 2.53   | 1.16 |
| -7 | -4 | 9  | 3.28   | 1.07 |
| -7 | -4 | 10 | 85.72  | 3.23 |
| -7 | -4 | 10 | 83.35  | 3.37 |
| -7 | -4 | 10 | 94.02  | 3.94 |

## CIF 31

|    |    |    |        |       |
|----|----|----|--------|-------|
| -7 | -4 | 10 | 81.26  | 2.58  |
| -7 | -4 | 10 | 92.47  | 3.77  |
| -7 | -4 | 10 | 90.50  | 3.97  |
| -7 | -4 | 10 | 87.20  | 3.67  |
| -7 | -4 | 11 | 23.26  | 1.85  |
| -7 | -4 | 11 | 23.86  | 1.95  |
| -7 | -4 | 11 | 21.72  | 1.64  |
| -7 | -4 | 11 | 18.71  | 1.58  |
| -7 | -4 | 11 | 23.29  | 2.02  |
| -7 | -4 | 11 | 22.62  | 2.03  |
| -7 | -4 | 12 | 42.09  | 2.20  |
| -7 | -4 | 12 | 41.06  | 2.27  |
| -7 | -4 | 12 | 42.40  | 2.30  |
| -7 | -4 | 13 | 3.15   | 0.87  |
| -7 | -4 | 13 | 2.42   | 0.68  |
| -7 | -4 | 14 | 129.78 | 3.06  |
| -7 | -4 | 14 | 130.34 | 3.00  |
| -7 | -3 | -6 | 6.03   | 0.65  |
| -7 | -3 | -5 | 39.99  | 1.64  |
| -7 | -3 | -4 | 29.36  | 1.71  |
| -7 | -3 | -4 | 25.69  | 1.72  |
| -7 | -3 | -3 | 133.68 | 3.95  |
| -7 | -3 | -3 | 137.01 | 3.91  |
| -7 | -3 | -2 | 86.53  | 3.27  |
| -7 | -3 | -2 | 78.48  | 3.19  |
| -7 | -3 | -1 | 132.82 | 3.54  |
| -7 | -3 | -1 | 129.77 | 4.10  |
| -7 | -3 | -1 | 128.43 | 3.43  |
| -7 | -3 | 0  | 219.00 | 5.52  |
| -7 | -3 | 0  | 219.00 | 4.98  |
| -7 | -3 | 0  | 214.13 | 5.29  |
| -7 | -3 | 0  | 217.28 | 4.98  |
| -7 | -3 | 1  | 143.14 | 4.95  |
| -7 | -3 | 1  | 188.70 | 4.74  |
| -7 | -3 | 1  | 157.72 | 6.04  |
| -7 | -3 | 1  | 195.94 | 5.11  |
| -7 | -3 | 1  | 142.70 | 4.97  |
| -7 | -3 | 1  | 185.09 | 4.79  |
| -7 | -3 | 2  | 464.45 | 9.22  |
| -7 | -3 | 2  | 490.20 | 10.69 |
| -7 | -3 | 2  | 428.93 | 7.60  |

## CIF 31

|    |    |   |        |       |
|----|----|---|--------|-------|
| -7 | -3 | 2 | 436.33 | 10.16 |
| -7 | -3 | 2 | 471.87 | 8.40  |
| -7 | -3 | 2 | 450.88 | 9.21  |
| -7 | -3 | 3 | 118.18 | 5.26  |
| -7 | -3 | 3 | 131.10 | 4.73  |
| -7 | -3 | 3 | 130.95 | 4.77  |
| -7 | -3 | 3 | 139.19 | 5.00  |
| -7 | -3 | 3 | 161.03 | 4.08  |
| -7 | -3 | 3 | 131.65 | 5.37  |
| -7 | -3 | 3 | 168.03 | 4.61  |
| -7 | -3 | 3 | 133.32 | 4.41  |
| -7 | -3 | 4 | 919.53 | 12.48 |
| -7 | -3 | 4 | 899.14 | 14.05 |
| -7 | -3 | 4 | 983.56 | 14.86 |
| -7 | -3 | 4 | 967.12 | 15.84 |
| -7 | -3 | 4 | 945.72 | 14.50 |
| -7 | -3 | 4 | 943.12 | 13.49 |
| -7 | -3 | 5 | 371.75 | 8.52  |
| -7 | -3 | 5 | 377.42 | 8.42  |
| -7 | -3 | 5 | 375.91 | 9.16  |
| -7 | -3 | 5 | 376.32 | 7.83  |
| -7 | -3 | 5 | 411.50 | 7.31  |
| -7 | -3 | 5 | 417.25 | 7.14  |
| -7 | -3 | 6 | 153.19 | 4.84  |
| -7 | -3 | 6 | 152.14 | 5.14  |
| -7 | -3 | 6 | 151.39 | 5.21  |
| -7 | -3 | 6 | 147.47 | 4.37  |
| -7 | -3 | 6 | 158.96 | 5.42  |
| -7 | -3 | 6 | 147.77 | 4.98  |
| -7 | -3 | 7 | 2.17   | 1.18  |
| -7 | -3 | 7 | 2.66   | 1.14  |
| -7 | -3 | 7 | 4.39   | 0.97  |
| -7 | -3 | 7 | 2.07   | 1.09  |
| -7 | -3 | 7 | 3.33   | 0.98  |
| -7 | -3 | 7 | 2.60   | 1.14  |
| -7 | -3 | 7 | 2.02   | 1.13  |
| -7 | -3 | 8 | 0.20   | 1.09  |
| -7 | -3 | 8 | 0.13   | 0.76  |
| -7 | -3 | 8 | 0.34   | 0.74  |
| -7 | -3 | 8 | 0.25   | 0.99  |
| -7 | -3 | 8 | 0.41   | 1.32  |

## CIF 31

|    |    |    |        |      |
|----|----|----|--------|------|
| -7 | -3 | 8  | -0.28  | 0.84 |
| -7 | -3 | 8  | 0.63   | 0.98 |
| -7 | -3 | 8  | 0.83   | 1.22 |
| -7 | -3 | 8  | 0.38   | 0.98 |
| -7 | -3 | 9  | 5.13   | 0.97 |
| -7 | -3 | 9  | 5.42   | 1.08 |
| -7 | -3 | 9  | 4.74   | 1.11 |
| -7 | -3 | 9  | 6.16   | 1.50 |
| -7 | -3 | 9  | 5.39   | 1.33 |
| -7 | -3 | 9  | 4.85   | 1.11 |
| -7 | -3 | 9  | 4.93   | 1.19 |
| -7 | -3 | 9  | 4.00   | 1.21 |
| -7 | -3 | 9  | 5.11   | 1.55 |
| -7 | -3 | 9  | 5.27   | 1.60 |
| -7 | -3 | 10 | 18.41  | 1.76 |
| -7 | -3 | 10 | 20.40  | 1.77 |
| -7 | -3 | 10 | 17.95  | 1.73 |
| -7 | -3 | 10 | 19.41  | 1.75 |
| -7 | -3 | 10 | 16.51  | 2.05 |
| -7 | -3 | 10 | 18.50  | 1.97 |
| -7 | -3 | 10 | 17.96  | 1.32 |
| -7 | -3 | 10 | 17.84  | 2.07 |
| -7 | -3 | 10 | 14.07  | 1.75 |
| -7 | -3 | 10 | 17.34  | 1.91 |
| -7 | -3 | 11 | 483.55 | 9.23 |
| -7 | -3 | 11 | 492.18 | 8.52 |
| -7 | -3 | 11 | 515.65 | 9.85 |
| -7 | -3 | 11 | 471.27 | 8.49 |
| -7 | -3 | 11 | 513.67 | 8.90 |
| -7 | -3 | 11 | 492.62 | 8.50 |
| -7 | -3 | 11 | 464.77 | 9.04 |
| -7 | -3 | 11 | 507.54 | 9.34 |
| -7 | -3 | 11 | 490.81 | 9.53 |
| -7 | -3 | 12 | 135.42 | 4.45 |
| -7 | -3 | 12 | 141.21 | 3.98 |
| -7 | -3 | 12 | 144.30 | 4.60 |
| -7 | -3 | 12 | 128.05 | 4.22 |
| -7 | -3 | 12 | 137.38 | 4.08 |
| -7 | -3 | 12 | 133.86 | 4.33 |
| -7 | -3 | 12 | 123.46 | 4.05 |
| -7 | -3 | 13 | 60.05  | 2.59 |

## CIF 31

|    |    |    |        |      |
|----|----|----|--------|------|
| -7 | -3 | 13 | 65.26  | 2.76 |
| -7 | -3 | 13 | 63.30  | 2.41 |
| -7 | -3 | 14 | 1.15   | 0.70 |
| -7 | -2 | -7 | 9.64   | 0.77 |
| -7 | -2 | -6 | 1.26   | 0.61 |
| -7 | -2 | -6 | 1.52   | 0.74 |
| -7 | -2 | -5 | 65.57  | 2.50 |
| -7 | -2 | -5 | 50.81  | 3.38 |
| -7 | -2 | -4 | 7.88   | 1.34 |
| -7 | -2 | -4 | 4.33   | 1.93 |
| -7 | -2 | -4 | 9.07   | 1.29 |
| -7 | -2 | -4 | 8.91   | 1.27 |
| -7 | -2 | -3 | 104.22 | 3.75 |
| -7 | -2 | -3 | 110.18 | 3.76 |
| -7 | -2 | -2 | 0.34   | 1.04 |
| -7 | -2 | -2 | 3.05   | 2.03 |
| -7 | -2 | -2 | 0.59   | 0.72 |
| -7 | -2 | -2 | 1.02   | 1.03 |
| -7 | -2 | -2 | 0.82   | 0.72 |
| -7 | -2 | -1 | 46.39  | 2.32 |
| -7 | -2 | -1 | 49.17  | 2.63 |
| -7 | -2 | -1 | 43.55  | 2.22 |
| -7 | -2 | -1 | 44.95  | 2.16 |
| -7 | -2 | 0  | 17.07  | 1.77 |
| -7 | -2 | 0  | 13.48  | 1.52 |
| -7 | -2 | 0  | 14.06  | 1.44 |
| -7 | -2 | 0  | 15.16  | 1.67 |
| -7 | -2 | 0  | 18.00  | 2.29 |
| -7 | -2 | 1  | 37.73  | 2.48 |
| -7 | -2 | 1  | 39.19  | 2.23 |
| -7 | -2 | 1  | 40.90  | 2.56 |
| -7 | -2 | 1  | 37.92  | 2.19 |
| -7 | -2 | 1  | 37.30  | 3.07 |
| -7 | -2 | 1  | 41.29  | 2.41 |
| -7 | -2 | 1  | 39.61  | 2.98 |
| -7 | -2 | 2  | 282.76 | 5.82 |
| -7 | -2 | 2  | 287.42 | 6.97 |
| -7 | -2 | 2  | 295.60 | 6.33 |
| -7 | -2 | 2  | 313.65 | 8.29 |
| -7 | -2 | 2  | 326.31 | 7.92 |
| -7 | -2 | 2  | 304.43 | 7.04 |



## CIF 31

|    |    |   |        |      |
|----|----|---|--------|------|
| -7 | -2 | 2 | 303.61 | 6.37 |
| -7 | -2 | 2 | 309.43 | 8.06 |
| -7 | -2 | 3 | 416.86 | 6.89 |
| -7 | -2 | 3 | 407.49 | 7.37 |
| -7 | -2 | 3 | 387.21 | 8.85 |
| -7 | -2 | 3 | 395.39 | 7.09 |
| -7 | -2 | 3 | 377.12 | 8.06 |
| -7 | -2 | 3 | 402.92 | 8.27 |
| -7 | -2 | 3 | 383.18 | 9.31 |
| -7 | -2 | 3 | 397.27 | 8.32 |
| -7 | -2 | 3 | 387.47 | 8.11 |
| -7 | -2 | 3 | 377.76 | 9.11 |
| -7 | -2 | 4 | 458.49 | 8.90 |
| -7 | -2 | 4 | 446.92 | 7.53 |
| -7 | -2 | 4 | 428.68 | 7.52 |
| -7 | -2 | 4 | 439.13 | 7.76 |
| -7 | -2 | 4 | 420.42 | 9.48 |
| -7 | -2 | 4 | 433.40 | 9.75 |
| -7 | -2 | 5 | 5.07   | 1.30 |
| -7 | -2 | 5 | 6.01   | 1.18 |
| -7 | -2 | 5 | 6.44   | 0.96 |
| -7 | -2 | 5 | 5.09   | 1.38 |
| -7 | -2 | 5 | 5.41   | 1.29 |
| -7 | -2 | 5 | 4.00   | 1.11 |
| -7 | -2 | 5 | 8.82   | 1.79 |
| -7 | -2 | 5 | 6.22   | 1.59 |
| -7 | -2 | 5 | 7.60   | 1.65 |
| -7 | -2 | 5 | 7.50   | 1.24 |
| -7 | -2 | 5 | 5.69   | 1.08 |
| -7 | -2 | 6 | 6.56   | 1.47 |
| -7 | -2 | 6 | 7.02   | 1.63 |
| -7 | -2 | 6 | 9.71   | 1.35 |
| -7 | -2 | 6 | 5.15   | 1.58 |
| -7 | -2 | 6 | 8.25   | 1.56 |
| -7 | -2 | 6 | 7.25   | 1.36 |
| -7 | -2 | 6 | 5.91   | 1.22 |
| -7 | -2 | 6 | 7.72   | 1.24 |
| -7 | -2 | 6 | 8.20   | 1.26 |
| -7 | -2 | 6 | 7.80   | 1.43 |
| -7 | -2 | 6 | 9.09   | 1.77 |
| -7 | -2 | 7 | 191.29 | 5.07 |

## CIF 31

|    |    |    |        |      |
|----|----|----|--------|------|
| -7 | -2 | 7  | 198.68 | 5.00 |
| -7 | -2 | 7  | 187.48 | 5.71 |
| -7 | -2 | 7  | 201.11 | 5.74 |
| -7 | -2 | 7  | 199.46 | 5.46 |
| -7 | -2 | 7  | 192.46 | 5.26 |
| -7 | -2 | 7  | 187.73 | 5.59 |
| -7 | -2 | 7  | 173.46 | 5.66 |
| -7 | -2 | 7  | 198.07 | 5.85 |
| -7 | -2 | 7  | 168.90 | 5.86 |
| -7 | -2 | 8  | 36.79  | 2.43 |
| -7 | -2 | 8  | 38.85  | 2.56 |
| -7 | -2 | 8  | 46.66  | 3.10 |
| -7 | -2 | 8  | 40.31  | 2.73 |
| -7 | -2 | 8  | 41.02  | 2.97 |
| -7 | -2 | 8  | 40.87  | 2.44 |
| -7 | -2 | 8  | 41.81  | 2.67 |
| -7 | -2 | 8  | 47.58  | 3.09 |
| -7 | -2 | 8  | 35.36  | 2.12 |
| -7 | -2 | 8  | 38.08  | 2.74 |
| -7 | -2 | 8  | 45.79  | 2.87 |
| -7 | -2 | 8  | 43.25  | 2.60 |
| -7 | -2 | 9  | 200.76 | 5.35 |
| -7 | -2 | 9  | 200.78 | 5.64 |
| -7 | -2 | 9  | 212.21 | 6.00 |
| -7 | -2 | 9  | 198.21 | 6.01 |
| -7 | -2 | 9  | 203.37 | 5.61 |
| -7 | -2 | 9  | 197.18 | 4.66 |
| -7 | -2 | 9  | 196.65 | 5.97 |
| -7 | -2 | 9  | 206.88 | 6.29 |
| -7 | -2 | 9  | 183.68 | 5.97 |
| -7 | -2 | 9  | 198.51 | 5.67 |
| -7 | -2 | 9  | 217.14 | 6.30 |
| -7 | -2 | 9  | 189.37 | 4.92 |
| -7 | -2 | 9  | 198.33 | 5.58 |
| -7 | -2 | 10 | 45.17  | 2.94 |
| -7 | -2 | 10 | 46.82  | 2.76 |
| -7 | -2 | 10 | 47.87  | 2.89 |
| -7 | -2 | 10 | 46.01  | 2.43 |
| -7 | -2 | 10 | 47.31  | 2.72 |
| -7 | -2 | 10 | 49.02  | 2.97 |
| -7 | -2 | 10 | 45.03  | 2.63 |

## CIF 31

|    |    |    |        |      |
|----|----|----|--------|------|
| -7 | -2 | 10 | 50.57  | 3.08 |
| -7 | -2 | 10 | 47.46  | 2.78 |
| -7 | -2 | 10 | 46.27  | 2.61 |
| -7 | -2 | 10 | 49.93  | 3.01 |
| -7 | -2 | 10 | 50.83  | 3.14 |
| -7 | -2 | 10 | 44.71  | 2.70 |
| -7 | -2 | 11 | 322.07 | 7.63 |
| -7 | -2 | 11 | 323.27 | 7.07 |
| -7 | -2 | 11 | 321.42 | 7.61 |
| -7 | -2 | 11 | 337.17 | 7.58 |
| -7 | -2 | 11 | 338.41 | 7.23 |
| -7 | -2 | 11 | 310.82 | 7.37 |
| -7 | -2 | 11 | 314.64 | 7.50 |
| -7 | -2 | 11 | 317.65 | 7.34 |
| -7 | -2 | 11 | 300.05 | 6.51 |
| -7 | -2 | 11 | 311.65 | 6.91 |
| -7 | -2 | 11 | 324.97 | 6.82 |
| -7 | -2 | 11 | 307.34 | 6.37 |
| -7 | -2 | 12 | 163.99 | 5.04 |
| -7 | -2 | 12 | 144.08 | 4.00 |
| -7 | -2 | 12 | 151.24 | 4.54 |
| -7 | -2 | 12 | 150.19 | 5.00 |
| -7 | -2 | 12 | 137.34 | 4.67 |
| -7 | -2 | 12 | 133.96 | 4.55 |
| -7 | -2 | 12 | 143.98 | 4.39 |
| -7 | -2 | 12 | 152.50 | 4.29 |
| -7 | -2 | 12 | 159.61 | 4.83 |
| -7 | -2 | 12 | 143.74 | 4.69 |
| -7 | -2 | 13 | 0.74   | 0.94 |
| -7 | -2 | 13 | 1.89   | 0.78 |
| -7 | -2 | 13 | 0.98   | 0.95 |
| -7 | -2 | 13 | 0.90   | 0.84 |
| -7 | -2 | 13 | 1.70   | 0.87 |
| -7 | -2 | 13 | 1.27   | 0.73 |
| -7 | -2 | 13 | 1.75   | 0.69 |
| -7 | -2 | 13 | 1.15   | 0.79 |
| -7 | -2 | 14 | 75.15  | 2.72 |
| -7 | -2 | 14 | 74.31  | 2.28 |
| -7 | -2 | 14 | 66.67  | 2.44 |
| -7 | -2 | 14 | 71.87  | 2.68 |
| -7 | -2 | 15 | 2.11   | 0.56 |

## CIF 31

|    |    |    |        |      |
|----|----|----|--------|------|
| -7 | -1 | -7 | 7.54   | 3.21 |
| -7 | -1 | -7 | 5.89   | 0.74 |
| -7 | -1 | -7 | 6.00   | 0.91 |
| -7 | -1 | -6 | 290.30 | 5.35 |
| -7 | -1 | -6 | 278.82 | 5.57 |
| -7 | -1 | -5 | 5.38   | 1.07 |
| -7 | -1 | -5 | 3.79   | 0.92 |
| -7 | -1 | -5 | 4.49   | 1.07 |
| -7 | -1 | -5 | 3.26   | 1.66 |
| -7 | -1 | -4 | 91.26  | 3.46 |
| -7 | -1 | -4 | 76.73  | 2.63 |
| -7 | -1 | -4 | 86.79  | 3.31 |
| -7 | -1 | -4 | 87.41  | 3.47 |
| -7 | -1 | -4 | 82.81  | 3.07 |
| -7 | -1 | -3 | 574.95 | 9.63 |
| -7 | -1 | -3 | 583.27 | 9.62 |
| -7 | -1 | -3 | 551.96 | 8.56 |
| -7 | -1 | -3 | 579.16 | 9.69 |
| -7 | -1 | -3 | 541.00 | 8.70 |
| -7 | -1 | -3 | 565.12 | 8.98 |
| -7 | -1 | -2 | 127.79 | 4.15 |
| -7 | -1 | -2 | 120.06 | 3.84 |
| -7 | -1 | -2 | 121.78 | 3.84 |
| -7 | -1 | -2 | 123.99 | 3.85 |
| -7 | -1 | -2 | 119.12 | 4.90 |
| -7 | -1 | -2 | 125.65 | 4.18 |
| -7 | -1 | -1 | 488.02 | 7.87 |
| -7 | -1 | -1 | 490.20 | 8.65 |
| -7 | -1 | -1 | 483.31 | 8.20 |
| -7 | -1 | -1 | 476.87 | 8.35 |
| -7 | -1 | -1 | 487.10 | 8.40 |
| -7 | -1 | -1 | 469.29 | 9.85 |
| -7 | -1 | -1 | 484.11 | 8.75 |
| -7 | -1 | 0  | 259.60 | 5.61 |
| -7 | -1 | 0  | 253.47 | 5.61 |
| -7 | -1 | 0  | 266.42 | 6.81 |
| -7 | -1 | 0  | 251.10 | 7.40 |
| -7 | -1 | 0  | 258.08 | 5.84 |
| -7 | -1 | 0  | 252.47 | 6.94 |
| -7 | -1 | 0  | 261.92 | 5.96 |
| -7 | -1 | 0  | 234.69 | 7.17 |

## CIF 31

|    |    |   |        |       |
|----|----|---|--------|-------|
| -7 | -1 | 1 | 408.24 | 7.24  |
| -7 | -1 | 1 | 384.98 | 9.11  |
| -7 | -1 | 1 | 419.60 | 7.46  |
| -7 | -1 | 1 | 384.07 | 8.82  |
| -7 | -1 | 1 | 404.13 | 7.21  |
| -7 | -1 | 1 | 399.79 | 7.55  |
| -7 | -1 | 1 | 414.51 | 8.89  |
| -7 | -1 | 2 | 15.41  | 1.52  |
| -7 | -1 | 2 | 13.35  | 1.26  |
| -7 | -1 | 2 | 10.82  | 1.40  |
| -7 | -1 | 2 | 14.33  | 1.90  |
| -7 | -1 | 2 | 12.95  | 1.92  |
| -7 | -1 | 2 | 12.71  | 1.82  |
| -7 | -1 | 2 | 12.90  | 1.54  |
| -7 | -1 | 2 | 14.04  | 1.44  |
| -7 | -1 | 3 | 87.91  | 3.52  |
| -7 | -1 | 3 | 84.38  | 3.86  |
| -7 | -1 | 3 | 89.88  | 3.54  |
| -7 | -1 | 3 | 93.67  | 4.18  |
| -7 | -1 | 3 | 87.87  | 4.09  |
| -7 | -1 | 3 | 78.65  | 4.13  |
| -7 | -1 | 3 | 101.45 | 3.48  |
| -7 | -1 | 3 | 102.19 | 3.51  |
| -7 | -1 | 3 | 99.99  | 3.27  |
| -7 | -1 | 4 | 261.32 | 6.01  |
| -7 | -1 | 4 | 248.92 | 6.05  |
| -7 | -1 | 4 | 238.36 | 7.13  |
| -7 | -1 | 4 | 233.64 | 6.55  |
| -7 | -1 | 4 | 235.96 | 5.94  |
| -7 | -1 | 4 | 237.30 | 5.64  |
| -7 | -1 | 4 | 238.94 | 5.53  |
| -7 | -1 | 4 | 222.39 | 4.87  |
| -7 | -1 | 4 | 268.30 | 7.20  |
| -7 | -1 | 4 | 225.12 | 6.80  |
| -7 | -1 | 5 | 648.37 | 11.44 |
| -7 | -1 | 5 | 627.24 | 10.51 |
| -7 | -1 | 5 | 575.89 | 11.50 |
| -7 | -1 | 5 | 615.85 | 9.58  |
| -7 | -1 | 5 | 623.23 | 11.52 |
| -7 | -1 | 5 | 564.83 | 10.80 |
| -7 | -1 | 5 | 638.39 | 10.13 |

## CIF 31

|    |    |   |        |       |
|----|----|---|--------|-------|
| -7 | -1 | 5 | 581.84 | 10.10 |
| -7 | -1 | 5 | 588.40 | 9.68  |
| -7 | -1 | 5 | 603.83 | 11.46 |
| -7 | -1 | 5 | 592.27 | 10.01 |
| -7 | -1 | 6 | 225.19 | 6.71  |
| -7 | -1 | 6 | 235.61 | 6.25  |
| -7 | -1 | 6 | 267.47 | 6.23  |
| -7 | -1 | 6 | 226.49 | 6.97  |
| -7 | -1 | 6 | 232.73 | 6.63  |
| -7 | -1 | 6 | 254.82 | 6.87  |
| -7 | -1 | 6 | 254.40 | 6.03  |
| -7 | -1 | 6 | 252.35 | 6.27  |
| -7 | -1 | 6 | 237.06 | 6.26  |
| -7 | -1 | 6 | 239.42 | 6.16  |
| -7 | -1 | 6 | 254.43 | 5.70  |
| -7 | -1 | 6 | 249.94 | 6.19  |
| -7 | -1 | 7 | 114.56 | 4.59  |
| -7 | -1 | 7 | 107.16 | 3.82  |
| -7 | -1 | 7 | 120.06 | 4.22  |
| -7 | -1 | 7 | 107.62 | 4.52  |
| -7 | -1 | 7 | 112.36 | 4.37  |
| -7 | -1 | 7 | 116.36 | 4.52  |
| -7 | -1 | 7 | 109.21 | 4.73  |
| -7 | -1 | 7 | 121.36 | 4.23  |
| -7 | -1 | 7 | 115.01 | 3.74  |
| -7 | -1 | 7 | 113.74 | 4.38  |
| -7 | -1 | 7 | 107.36 | 4.16  |
| -7 | -1 | 7 | 111.73 | 4.18  |
| -7 | -1 | 7 | 122.49 | 4.28  |
| -7 | -1 | 8 | 0.60   | 0.77  |
| -7 | -1 | 8 | 0.56   | 1.12  |
| -7 | -1 | 8 | 0.77   | 0.93  |
| -7 | -1 | 8 | 0.35   | 0.63  |
| -7 | -1 | 8 | -0.05  | 0.95  |
| -7 | -1 | 8 | 0.55   | 1.10  |
| -7 | -1 | 8 | 0.26   | 0.94  |
| -7 | -1 | 8 | -0.17  | 0.83  |
| -7 | -1 | 8 | 0.33   | 1.01  |
| -7 | -1 | 8 | 0.60   | 0.79  |
| -7 | -1 | 8 | 0.74   | 0.88  |
| -7 | -1 | 8 | 1.18   | 1.03  |

## CIF 31

|    |    |    |        |      |
|----|----|----|--------|------|
| -7 | -1 | 8  | 0.05   | 1.10 |
| -7 | -1 | 8  | 0.07   | 0.77 |
| -7 | -1 | 9  | 0.90   | 0.81 |
| -7 | -1 | 9  | 0.67   | 0.70 |
| -7 | -1 | 9  | 0.31   | 0.88 |
| -7 | -1 | 9  | -0.29  | 0.97 |
| -7 | -1 | 9  | 1.73   | 1.05 |
| -7 | -1 | 9  | -0.30  | 0.95 |
| -7 | -1 | 9  | 0.82   | 1.20 |
| -7 | -1 | 9  | 0.05   | 1.04 |
| -7 | -1 | 9  | 1.60   | 0.71 |
| -7 | -1 | 9  | 0.82   | 1.28 |
| -7 | -1 | 9  | 0.34   | 0.84 |
| -7 | -1 | 9  | -0.23  | 1.06 |
| -7 | -1 | 9  | 0.71   | 1.01 |
| -7 | -1 | 9  | 0.27   | 1.15 |
| -7 | -1 | 9  | -0.05  | 1.07 |
| -7 | -1 | 10 | 102.33 | 4.03 |
| -7 | -1 | 10 | 116.10 | 4.68 |
| -7 | -1 | 10 | 113.49 | 3.74 |
| -7 | -1 | 10 | 112.10 | 4.60 |
| -7 | -1 | 10 | 108.99 | 3.90 |
| -7 | -1 | 10 | 111.73 | 4.11 |
| -7 | -1 | 10 | 116.30 | 4.40 |
| -7 | -1 | 10 | 114.98 | 3.97 |
| -7 | -1 | 10 | 103.75 | 4.32 |
| -7 | -1 | 10 | 114.77 | 4.67 |
| -7 | -1 | 10 | 109.17 | 3.69 |
| -7 | -1 | 10 | 102.44 | 4.27 |
| -7 | -1 | 10 | 124.35 | 4.75 |
| -7 | -1 | 11 | 29.55  | 2.45 |
| -7 | -1 | 11 | 31.08  | 2.00 |
| -7 | -1 | 11 | 30.42  | 2.52 |
| -7 | -1 | 11 | 31.44  | 2.55 |
| -7 | -1 | 11 | 29.22  | 2.17 |
| -7 | -1 | 11 | 32.09  | 2.37 |
| -7 | -1 | 11 | 30.31  | 2.06 |
| -7 | -1 | 11 | 30.73  | 1.99 |
| -7 | -1 | 11 | 26.91  | 2.25 |
| -7 | -1 | 11 | 31.06  | 2.51 |
| -7 | -1 | 11 | 27.16  | 2.13 |

## CIF 31

|    |    |    |        |      |
|----|----|----|--------|------|
| -7 | -1 | 12 | 1.83   | 0.92 |
| -7 | -1 | 12 | 1.07   | 0.91 |
| -7 | -1 | 12 | 0.69   | 1.18 |
| -7 | -1 | 12 | 0.66   | 0.71 |
| -7 | -1 | 12 | 1.17   | 0.67 |
| -7 | -1 | 12 | 1.10   | 0.87 |
| -7 | -1 | 12 | 0.97   | 0.82 |
| -7 | -1 | 12 | 0.26   | 1.01 |
| -7 | -1 | 12 | 0.63   | 1.01 |
| -7 | -1 | 12 | 1.23   | 0.99 |
| -7 | -1 | 12 | -0.05  | 0.95 |
| -7 | -1 | 13 | 167.10 | 4.67 |
| -7 | -1 | 13 | 159.64 | 4.63 |
| -7 | -1 | 13 | 162.56 | 4.78 |
| -7 | -1 | 13 | 156.66 | 4.30 |
| -7 | -1 | 13 | 155.31 | 4.24 |
| -7 | -1 | 13 | 161.81 | 4.06 |
| -7 | -1 | 13 | 169.98 | 4.86 |
| -7 | -1 | 13 | 151.99 | 4.53 |
| -7 | -1 | 14 | 93.89  | 3.17 |
| -7 | -1 | 14 | 101.60 | 3.21 |
| -7 | -1 | 14 | 98.05  | 2.94 |
| -7 | -1 | 14 | 90.89  | 2.58 |
| -7 | -1 | 14 | 97.40  | 3.35 |
| -7 | -1 | 15 | 42.93  | 1.70 |
| -7 | 0  | -8 | 0.17   | 0.38 |
| -7 | 0  | -8 | 0.70   | 0.64 |
| -7 | 0  | -7 | 11.66  | 3.01 |
| -7 | 0  | -7 | 13.05  | 1.20 |
| -7 | 0  | -7 | 14.71  | 1.38 |
| -7 | 0  | -7 | 12.98  | 2.25 |
| -7 | 0  | -6 | 15.82  | 1.48 |
| -7 | 0  | -6 | 14.43  | 3.99 |
| -7 | 0  | -6 | 15.09  | 2.43 |
| -7 | 0  | -6 | 15.35  | 1.49 |
| -7 | 0  | -6 | 15.83  | 1.37 |
| -7 | 0  | -6 | 14.15  | 1.33 |
| -7 | 0  | -5 | 9.46   | 6.40 |
| -7 | 0  | -5 | 12.50  | 1.48 |
| -7 | 0  | -5 | 10.86  | 1.33 |
| -7 | 0  | -5 | 12.95  | 1.45 |



## CIF 31

|    |   |    |         |       |
|----|---|----|---------|-------|
| -7 | 0 | -5 | 11.81   | 1.49  |
| -7 | 0 | -5 | 10.36   | 2.02  |
| -7 | 0 | -4 | 30.12   | 1.92  |
| -7 | 0 | -4 | 33.52   | 2.10  |
| -7 | 0 | -4 | 35.72   | 2.20  |
| -7 | 0 | -4 | 31.01   | 2.21  |
| -7 | 0 | -4 | 28.21   | 2.88  |
| -7 | 0 | -4 | 34.42   | 6.95  |
| -7 | 0 | -4 | 33.48   | 2.32  |
| -7 | 0 | -4 | 31.40   | 2.25  |
| -7 | 0 | -3 | 6.93    | 1.84  |
| -7 | 0 | -3 | 6.42    | 1.24  |
| -7 | 0 | -3 | 5.42    | 1.26  |
| -7 | 0 | -3 | 5.31    | 1.21  |
| -7 | 0 | -3 | 5.36    | 1.31  |
| -7 | 0 | -3 | 3.09    | 5.56  |
| -7 | 0 | -3 | 5.04    | 1.12  |
| -7 | 0 | -3 | 7.97    | 1.33  |
| -7 | 0 | -2 | 3.08    | 1.01  |
| -7 | 0 | -2 | 2.14    | 1.00  |
| -7 | 0 | -2 | 2.54    | 1.04  |
| -7 | 0 | -2 | 2.98    | 1.04  |
| -7 | 0 | -2 | 1.94    | 0.99  |
| -7 | 0 | -2 | 2.30    | 0.78  |
| -7 | 0 | -2 | 1.20    | 1.70  |
| -7 | 0 | -1 | 121.27  | 3.92  |
| -7 | 0 | -1 | 116.62  | 5.21  |
| -7 | 0 | -1 | 119.48  | 3.91  |
| -7 | 0 | -1 | 115.24  | 3.91  |
| -7 | 0 | -1 | 121.14  | 3.59  |
| -7 | 0 | -1 | 124.09  | 4.49  |
| -7 | 0 | -1 | 117.06  | 3.94  |
| -7 | 0 | -1 | 123.46  | 4.89  |
| -7 | 0 | 0  | 1842.81 | 20.66 |
| -7 | 0 | 0  | 1852.96 | 20.18 |
| -7 | 0 | 0  | 1888.75 | 23.23 |
| -7 | 0 | 0  | 1898.21 | 20.50 |
| -7 | 0 | 0  | 1868.60 | 20.84 |
| -7 | 0 | 0  | 1871.96 | 22.32 |
| -7 | 0 | 1  | 1047.65 | 14.87 |
| -7 | 0 | 1  | 1005.62 | 12.89 |

## CIF 31

|    |   |   |         |       |
|----|---|---|---------|-------|
| -7 | 0 | 1 | 1033.67 | 13.15 |
| -7 | 0 | 1 | 935.89  | 12.87 |
| -7 | 0 | 1 | 1052.58 | 15.19 |
| -7 | 0 | 1 | 957.02  | 15.56 |
| -7 | 0 | 1 | 1037.55 | 15.52 |
| -7 | 0 | 1 | 985.87  | 12.53 |
| -7 | 0 | 2 | 244.31  | 6.64  |
| -7 | 0 | 2 | 257.42  | 5.52  |
| -7 | 0 | 2 | 220.31  | 5.95  |
| -7 | 0 | 2 | 237.01  | 5.17  |
| -7 | 0 | 2 | 252.90  | 6.49  |
| -7 | 0 | 2 | 222.48  | 6.75  |
| -7 | 0 | 2 | 238.63  | 5.46  |
| -7 | 0 | 2 | 226.14  | 5.26  |
| -7 | 0 | 3 | 251.46  | 7.02  |
| -7 | 0 | 3 | 248.29  | 5.57  |
| -7 | 0 | 3 | 249.80  | 7.08  |
| -7 | 0 | 3 | 239.86  | 5.53  |
| -7 | 0 | 3 | 240.66  | 5.39  |
| -7 | 0 | 3 | 254.84  | 5.75  |
| -7 | 0 | 3 | 233.41  | 4.93  |
| -7 | 0 | 3 | 244.36  | 6.65  |
| -7 | 0 | 3 | 241.47  | 6.28  |
| -7 | 0 | 3 | 256.95  | 6.61  |
| -7 | 0 | 4 | 1081.34 | 18.18 |
| -7 | 0 | 4 | 1183.01 | 14.75 |
| -7 | 0 | 4 | 1247.39 | 16.90 |
| -7 | 0 | 4 | 1245.91 | 15.31 |
| -7 | 0 | 4 | 1274.42 | 15.55 |
| -7 | 0 | 4 | 1163.19 | 17.53 |
| -7 | 0 | 4 | 1170.18 | 13.52 |
| -7 | 0 | 4 | 1171.56 | 14.96 |
| -7 | 0 | 4 | 1176.34 | 17.10 |
| -7 | 0 | 4 | 1202.05 | 15.13 |
| -7 | 0 | 4 | 1142.83 | 16.07 |
| -7 | 0 | 5 | 216.49  | 6.02  |
| -7 | 0 | 5 | 222.44  | 5.60  |
| -7 | 0 | 5 | 227.39  | 6.54  |
| -7 | 0 | 5 | 228.82  | 6.84  |
| -7 | 0 | 5 | 245.11  | 5.81  |
| -7 | 0 | 5 | 217.27  | 5.65  |

## CIF 31

|    |   |   |        |      |
|----|---|---|--------|------|
| -7 | 0 | 5 | 220.28 | 6.69 |
| -7 | 0 | 5 | 220.42 | 4.75 |
| -7 | 0 | 5 | 225.18 | 5.64 |
| -7 | 0 | 5 | 232.34 | 5.48 |
| -7 | 0 | 5 | 251.57 | 6.68 |
| -7 | 0 | 5 | 220.75 | 6.15 |
| -7 | 0 | 5 | 209.17 | 5.06 |
| -7 | 0 | 5 | 219.70 | 5.48 |
| -7 | 0 | 6 | 18.27  | 1.97 |
| -7 | 0 | 6 | 16.34  | 2.05 |
| -7 | 0 | 6 | 15.50  | 1.35 |
| -7 | 0 | 6 | 16.68  | 1.95 |
| -7 | 0 | 6 | 17.41  | 1.89 |
| -7 | 0 | 6 | 17.84  | 1.75 |
| -7 | 0 | 6 | 17.32  | 1.80 |
| -7 | 0 | 6 | 16.05  | 1.60 |
| -7 | 0 | 6 | 17.17  | 1.64 |
| -7 | 0 | 6 | 16.25  | 1.89 |
| -7 | 0 | 6 | 22.32  | 2.66 |
| -7 | 0 | 6 | 18.01  | 1.56 |
| -7 | 0 | 6 | 16.22  | 1.45 |
| -7 | 0 | 6 | 16.25  | 1.74 |
| -7 | 0 | 6 | 17.41  | 1.75 |
| -7 | 0 | 6 | 16.98  | 2.01 |
| -7 | 0 | 7 | 4.59   | 1.00 |
| -7 | 0 | 7 | 5.22   | 1.44 |
| -7 | 0 | 7 | 4.89   | 1.33 |
| -7 | 0 | 7 | 3.75   | 1.18 |
| -7 | 0 | 7 | 3.06   | 1.27 |
| -7 | 0 | 7 | 2.74   | 1.14 |
| -7 | 0 | 7 | 2.26   | 1.06 |
| -7 | 0 | 7 | 2.33   | 1.59 |
| -7 | 0 | 7 | 2.58   | 0.88 |
| -7 | 0 | 7 | 2.44   | 1.20 |
| -7 | 0 | 7 | 3.81   | 0.93 |
| -7 | 0 | 7 | 2.40   | 1.00 |
| -7 | 0 | 7 | 3.55   | 1.14 |
| -7 | 0 | 7 | 2.68   | 0.95 |
| -7 | 0 | 7 | 2.36   | 1.16 |
| -7 | 0 | 7 | 2.31   | 1.23 |
| -7 | 0 | 7 | 3.27   | 1.13 |

## CIF 31

|    |   |    |        |       |
|----|---|----|--------|-------|
| -7 | 0 | 7  | 2.82   | 1.14  |
| -7 | 0 | 8  | 56.23  | 3.35  |
| -7 | 0 | 8  | 70.31  | 3.74  |
| -7 | 0 | 8  | 63.47  | 2.94  |
| -7 | 0 | 8  | 61.65  | 3.16  |
| -7 | 0 | 8  | 57.15  | 3.89  |
| -7 | 0 | 8  | 67.52  | 3.42  |
| -7 | 0 | 8  | 66.24  | 3.53  |
| -7 | 0 | 8  | 64.62  | 3.55  |
| -7 | 0 | 8  | 70.02  | 3.22  |
| -7 | 0 | 8  | 61.98  | 3.15  |
| -7 | 0 | 8  | 57.32  | 3.18  |
| -7 | 0 | 8  | 62.10  | 3.33  |
| -7 | 0 | 8  | 60.71  | 2.55  |
| -7 | 0 | 8  | 62.53  | 3.39  |
| -7 | 0 | 8  | 59.55  | 3.13  |
| -7 | 0 | 8  | 63.05  | 3.02  |
| -7 | 0 | 8  | 60.98  | 2.78  |
| -7 | 0 | 8  | 61.13  | 3.16  |
| -7 | 0 | 8  | 61.14  | 3.45  |
| -7 | 0 | 9  | 224.20 | 6.16  |
| -7 | 0 | 9  | 228.91 | 6.46  |
| -7 | 0 | 9  | 243.75 | 6.39  |
| -7 | 0 | 9  | 247.39 | 7.08  |
| -7 | 0 | 9  | 264.10 | 6.60  |
| -7 | 0 | 9  | 261.79 | 6.00  |
| -7 | 0 | 9  | 261.69 | 6.56  |
| -7 | 0 | 9  | 253.09 | 6.09  |
| -7 | 0 | 9  | 259.45 | 6.73  |
| -7 | 0 | 9  | 236.02 | 6.58  |
| -7 | 0 | 9  | 257.24 | 6.86  |
| -7 | 0 | 9  | 254.33 | 6.12  |
| -7 | 0 | 9  | 241.42 | 6.63  |
| -7 | 0 | 9  | 251.62 | 5.73  |
| -7 | 0 | 10 | 535.56 | 10.09 |
| -7 | 0 | 10 | 519.43 | 9.45  |
| -7 | 0 | 10 | 545.57 | 9.10  |
| -7 | 0 | 10 | 581.67 | 10.17 |
| -7 | 0 | 10 | 507.19 | 9.76  |
| -7 | 0 | 10 | 574.94 | 10.23 |
| -7 | 0 | 10 | 562.21 | 10.60 |

## CIF 31

|    |   |    |        |       |
|----|---|----|--------|-------|
| -7 | 0 | 10 | 537.64 | 10.18 |
| -7 | 0 | 10 | 570.02 | 9.53  |
| -7 | 0 | 10 | 535.18 | 10.07 |
| -7 | 0 | 10 | 540.01 | 10.55 |
| -7 | 0 | 10 | 560.45 | 10.72 |
| -7 | 0 | 11 | 158.71 | 5.32  |
| -7 | 0 | 11 | 166.98 | 5.03  |
| -7 | 0 | 11 | 153.29 | 5.06  |
| -7 | 0 | 11 | 137.05 | 4.78  |
| -7 | 0 | 11 | 176.54 | 5.66  |
| -7 | 0 | 11 | 162.04 | 5.16  |
| -7 | 0 | 11 | 158.45 | 4.68  |
| -7 | 0 | 11 | 145.64 | 5.28  |
| -7 | 0 | 11 | 167.31 | 5.12  |
| -7 | 0 | 11 | 155.59 | 4.72  |
| -7 | 0 | 11 | 160.86 | 5.35  |
| -7 | 0 | 11 | 151.29 | 5.37  |
| -7 | 0 | 11 | 153.15 | 5.18  |
| -7 | 0 | 11 | 162.40 | 4.55  |
| -7 | 0 | 12 | 16.24  | 1.62  |
| -7 | 0 | 12 | 16.33  | 1.84  |
| -7 | 0 | 12 | 17.50  | 1.79  |
| -7 | 0 | 12 | 16.59  | 1.92  |
| -7 | 0 | 12 | 17.31  | 1.98  |
| -7 | 0 | 12 | 16.82  | 1.87  |
| -7 | 0 | 12 | 17.04  | 1.79  |
| -7 | 0 | 12 | 15.93  | 1.63  |
| -7 | 0 | 12 | 18.19  | 1.61  |
| -7 | 0 | 12 | 16.86  | 1.75  |
| -7 | 0 | 12 | 17.09  | 1.68  |
| -7 | 0 | 12 | 17.09  | 1.54  |
| -7 | 0 | 13 | 32.68  | 2.18  |
| -7 | 0 | 13 | 37.88  | 2.26  |
| -7 | 0 | 13 | 35.83  | 2.09  |
| -7 | 0 | 13 | 36.75  | 2.28  |
| -7 | 0 | 13 | 36.63  | 1.91  |
| -7 | 0 | 13 | 33.56  | 2.26  |
| -7 | 0 | 13 | 32.21  | 2.31  |
| -7 | 0 | 13 | 36.81  | 2.06  |
| -7 | 0 | 13 | 38.24  | 2.30  |
| -7 | 0 | 13 | 36.47  | 2.35  |

## CIF 31

|    |   |    |       |      |
|----|---|----|-------|------|
| -7 | 0 | 14 | 0.82  | 0.77 |
| -7 | 0 | 14 | 1.40  | 0.90 |
| -7 | 0 | 14 | 1.37  | 0.81 |
| -7 | 0 | 14 | 0.78  | 0.72 |
| -7 | 0 | 14 | 0.67  | 0.65 |
| -7 | 0 | 15 | 91.05 | 2.46 |
| -7 | 0 | 15 | 85.83 | 2.54 |
| -7 | 1 | -8 | 37.70 | 1.70 |
| -7 | 1 | -8 | 40.89 | 3.12 |
| -7 | 1 | -8 | 36.54 | 3.68 |
| -7 | 1 | -8 | 42.41 | 1.97 |
| -7 | 1 | -7 | 12.30 | 1.32 |
| -7 | 1 | -7 | 12.86 | 1.44 |
| -7 | 1 | -7 | 10.42 | 3.51 |
| -7 | 1 | -7 | 11.71 | 1.41 |
| -7 | 1 | -7 | 6.74  | 2.84 |
| -7 | 1 | -7 | 10.70 | 6.43 |
| -7 | 1 | -7 | 12.19 | 1.28 |
| -7 | 1 | -6 | 7.96  | 2.32 |
| -7 | 1 | -6 | 14.06 | 1.57 |
| -7 | 1 | -6 | 11.15 | 7.34 |
| -7 | 1 | -6 | 13.17 | 1.59 |
| -7 | 1 | -6 | 13.61 | 1.55 |
| -7 | 1 | -6 | 14.44 | 2.29 |
| -7 | 1 | -6 | 15.26 | 2.27 |
| -7 | 1 | -5 | 17.75 | 1.59 |
| -7 | 1 | -5 | 18.47 | 1.81 |
| -7 | 1 | -5 | 12.37 | 2.37 |
| -7 | 1 | -5 | 15.62 | 1.75 |
| -7 | 1 | -5 | 15.28 | 7.62 |
| -7 | 1 | -5 | 18.51 | 2.03 |
| -7 | 1 | -5 | 16.88 | 1.78 |
| -7 | 1 | -5 | 18.57 | 1.65 |
| -7 | 1 | -4 | 63.01 | 3.12 |
| -7 | 1 | -4 | 62.86 | 3.96 |
| -7 | 1 | -4 | 63.78 | 3.02 |
| -7 | 1 | -4 | 68.50 | 2.97 |
| -7 | 1 | -4 | 64.17 | 2.73 |
| -7 | 1 | -4 | 72.39 | 7.93 |
| -7 | 1 | -4 | 68.28 | 2.94 |
| -7 | 1 | -4 | 67.85 | 3.14 |

## CIF 31

|    |   |    |        |       |
|----|---|----|--------|-------|
| -7 | 1 | -4 | 66.01  | 3.12  |
| -7 | 1 | -3 | 251.86 | 6.27  |
| -7 | 1 | -3 | 274.69 | 6.28  |
| -7 | 1 | -3 | 279.50 | 6.15  |
| -7 | 1 | -3 | 264.30 | 6.18  |
| -7 | 1 | -3 | 245.28 | 7.59  |
| -7 | 1 | -3 | 232.37 | 9.33  |
| -7 | 1 | -3 | 266.68 | 5.99  |
| -7 | 1 | -2 | 628.07 | 10.04 |
| -7 | 1 | -2 | 601.33 | 10.34 |
| -7 | 1 | -2 | 531.28 | 11.82 |
| -7 | 1 | -2 | 608.16 | 12.17 |
| -7 | 1 | -2 | 661.70 | 10.00 |
| -7 | 1 | -2 | 591.66 | 9.90  |
| -7 | 1 | -2 | 623.32 | 9.80  |
| -7 | 1 | -2 | 570.79 | 9.80  |
| -7 | 1 | -2 | 618.56 | 9.97  |
| -7 | 1 | -1 | 226.57 | 7.10  |
| -7 | 1 | -1 | 208.03 | 5.23  |
| -7 | 1 | -1 | 205.67 | 5.23  |
| -7 | 1 | -1 | 210.97 | 5.17  |
| -7 | 1 | -1 | 209.07 | 7.20  |
| -7 | 1 | -1 | 218.05 | 5.35  |
| -7 | 1 | -1 | 212.78 | 4.84  |
| -7 | 1 | -1 | 211.55 | 5.98  |
| -7 | 1 | 0  | 253.10 | 6.54  |
| -7 | 1 | 0  | 239.90 | 6.44  |
| -7 | 1 | 0  | 246.30 | 5.58  |
| -7 | 1 | 0  | 228.43 | 5.13  |
| -7 | 1 | 0  | 238.52 | 5.23  |
| -7 | 1 | 0  | 240.74 | 5.45  |
| -7 | 1 | 0  | 246.55 | 7.03  |
| -7 | 1 | 1  | 66.55  | 3.58  |
| -7 | 1 | 1  | 67.81  | 2.72  |
| -7 | 1 | 1  | 67.14  | 3.43  |
| -7 | 1 | 1  | 69.23  | 3.13  |
| -7 | 1 | 1  | 74.35  | 3.55  |
| -7 | 1 | 1  | 68.51  | 2.71  |
| -7 | 1 | 1  | 72.36  | 3.79  |
| -7 | 1 | 1  | 64.80  | 2.49  |
| -7 | 1 | 2  | 933.53 | 12.04 |

## CIF 31

|    |   |   |         |       |
|----|---|---|---------|-------|
| -7 | 1 | 2 | 842.00  | 12.61 |
| -7 | 1 | 2 | 900.01  | 11.46 |
| -7 | 1 | 2 | 834.70  | 14.88 |
| -7 | 1 | 2 | 1005.37 | 12.75 |
| -7 | 1 | 2 | 902.72  | 14.23 |
| -7 | 1 | 2 | 905.82  | 13.21 |
| -7 | 1 | 2 | 920.40  | 11.26 |
| -7 | 1 | 2 | 940.49  | 14.47 |
| -7 | 1 | 2 | 816.75  | 14.12 |
| -7 | 1 | 2 | 948.55  | 14.22 |
| -7 | 1 | 3 | 234.33  | 5.45  |
| -7 | 1 | 3 | 231.82  | 6.54  |
| -7 | 1 | 3 | 237.67  | 5.55  |
| -7 | 1 | 3 | 214.89  | 5.65  |
| -7 | 1 | 3 | 223.57  | 7.08  |
| -7 | 1 | 3 | 224.28  | 4.85  |
| -7 | 1 | 3 | 215.66  | 4.65  |
| -7 | 1 | 4 | 1015.82 | 12.94 |
| -7 | 1 | 4 | 1093.75 | 14.08 |
| -7 | 1 | 4 | 1065.84 | 12.85 |
| -7 | 1 | 4 | 1022.84 | 14.34 |
| -7 | 1 | 4 | 1021.70 | 15.48 |
| -7 | 1 | 4 | 1003.60 | 13.86 |
| -7 | 1 | 4 | 890.24  | 16.04 |
| -7 | 1 | 4 | 982.51  | 15.22 |
| -7 | 1 | 4 | 1045.49 | 15.31 |
| -7 | 1 | 4 | 975.29  | 12.89 |
| -7 | 1 | 4 | 1043.97 | 14.35 |
| -7 | 1 | 4 | 1064.04 | 15.35 |
| -7 | 1 | 4 | 1021.93 | 13.28 |
| -7 | 1 | 5 | 560.78  | 8.79  |
| -7 | 1 | 5 | 579.74  | 9.29  |
| -7 | 1 | 5 | 602.95  | 9.92  |
| -7 | 1 | 5 | 606.84  | 10.35 |
| -7 | 1 | 5 | 588.90  | 10.31 |
| -7 | 1 | 5 | 612.75  | 10.85 |
| -7 | 1 | 5 | 545.42  | 9.56  |
| -7 | 1 | 5 | 586.94  | 10.98 |
| -7 | 1 | 5 | 564.74  | 10.54 |
| -7 | 1 | 5 | 575.05  | 9.14  |
| -7 | 1 | 5 | 571.25  | 11.05 |



## CIF 31

|    |   |   |         |       |
|----|---|---|---------|-------|
| -7 | 1 | 5 | 580.78  | 9.46  |
| -7 | 1 | 5 | 556.21  | 8.73  |
| -7 | 1 | 6 | 1498.58 | 19.34 |
| -7 | 1 | 6 | 1550.91 | 18.54 |
| -7 | 1 | 6 | 1511.50 | 19.58 |
| -7 | 1 | 6 | 1500.35 | 18.00 |
| -7 | 1 | 6 | 1469.47 | 19.03 |
| -7 | 1 | 6 | 1447.70 | 17.18 |
| -7 | 1 | 6 | 1497.46 | 20.09 |
| -7 | 1 | 6 | 1507.00 | 17.48 |
| -7 | 1 | 6 | 1405.01 | 18.78 |
| -7 | 1 | 6 | 1480.75 | 19.79 |
| -7 | 1 | 6 | 1390.12 | 17.48 |
| -7 | 1 | 6 | 1464.64 | 21.76 |
| -7 | 1 | 6 | 1469.20 | 18.95 |
| -7 | 1 | 6 | 1457.53 | 16.94 |
| -7 | 1 | 6 | 1416.69 | 19.74 |
| -7 | 1 | 6 | 1633.74 | 18.69 |
| -7 | 1 | 7 | 536.21  | 10.05 |
| -7 | 1 | 7 | 535.81  | 10.71 |
| -7 | 1 | 7 | 556.95  | 10.46 |
| -7 | 1 | 7 | 602.08  | 9.47  |
| -7 | 1 | 7 | 560.53  | 10.47 |
| -7 | 1 | 7 | 558.76  | 9.32  |
| -7 | 1 | 7 | 585.21  | 10.02 |
| -7 | 1 | 7 | 559.89  | 12.18 |
| -7 | 1 | 7 | 553.70  | 10.56 |
| -7 | 1 | 7 | 533.11  | 10.89 |
| -7 | 1 | 7 | 570.54  | 10.59 |
| -7 | 1 | 7 | 555.66  | 9.67  |
| -7 | 1 | 7 | 546.08  | 9.74  |
| -7 | 1 | 7 | 547.29  | 10.85 |
| -7 | 1 | 7 | 550.44  | 9.30  |
| -7 | 1 | 7 | 522.08  | 9.68  |
| -7 | 1 | 7 | 530.76  | 8.44  |
| -7 | 1 | 8 | 958.86  | 15.41 |
| -7 | 1 | 8 | 1120.48 | 14.32 |
| -7 | 1 | 8 | 1169.54 | 15.87 |
| -7 | 1 | 8 | 1143.40 | 16.42 |
| -7 | 1 | 8 | 1152.78 | 17.09 |
| -7 | 1 | 8 | 1139.20 | 15.50 |

## CIF 31

|    |   |    |         |       |
|----|---|----|---------|-------|
| -7 | 1 | 8  | 1096.86 | 15.07 |
| -7 | 1 | 8  | 1107.40 | 15.34 |
| -7 | 1 | 8  | 1135.83 | 15.18 |
| -7 | 1 | 8  | 1124.56 | 16.59 |
| -7 | 1 | 8  | 1031.65 | 17.75 |
| -7 | 1 | 8  | 1161.96 | 16.64 |
| -7 | 1 | 8  | 1142.38 | 16.46 |
| -7 | 1 | 8  | 1109.11 | 15.32 |
| -7 | 1 | 8  | 1163.44 | 16.78 |
| -7 | 1 | 8  | 1070.06 | 16.43 |
| -7 | 1 | 8  | 1111.26 | 15.74 |
| -7 | 1 | 8  | 1137.63 | 14.90 |
| -7 | 1 | 9  | 138.61  | 5.20  |
| -7 | 1 | 9  | 131.89  | 4.20  |
| -7 | 1 | 9  | 133.66  | 4.79  |
| -7 | 1 | 9  | 139.65  | 5.14  |
| -7 | 1 | 9  | 132.98  | 4.56  |
| -7 | 1 | 9  | 134.19  | 4.84  |
| -7 | 1 | 9  | 125.89  | 4.62  |
| -7 | 1 | 9  | 132.31  | 4.88  |
| -7 | 1 | 9  | 133.01  | 4.61  |
| -7 | 1 | 9  | 137.20  | 4.69  |
| -7 | 1 | 9  | 138.56  | 4.49  |
| -7 | 1 | 9  | 137.89  | 5.06  |
| -7 | 1 | 9  | 116.84  | 4.50  |
| -7 | 1 | 9  | 125.15  | 4.88  |
| -7 | 1 | 9  | 138.50  | 5.24  |
| -7 | 1 | 9  | 141.63  | 5.29  |
| -7 | 1 | 9  | 145.61  | 5.26  |
| -7 | 1 | 9  | 129.38  | 5.63  |
| -7 | 1 | 10 | 51.41   | 2.91  |
| -7 | 1 | 10 | 42.21   | 3.22  |
| -7 | 1 | 10 | 56.07   | 3.18  |
| -7 | 1 | 10 | 56.30   | 3.07  |
| -7 | 1 | 10 | 62.63   | 3.15  |
| -7 | 1 | 10 | 61.52   | 3.04  |
| -7 | 1 | 10 | 54.25   | 3.02  |
| -7 | 1 | 10 | 54.31   | 2.78  |
| -7 | 1 | 10 | 64.61   | 3.48  |
| -7 | 1 | 10 | 54.07   | 3.24  |
| -7 | 1 | 10 | 55.95   | 3.06  |

## CIF 31

|    |   |    |       |      |
|----|---|----|-------|------|
| -7 | 1 | 10 | 47.12 | 2.90 |
| -7 | 1 | 10 | 50.68 | 3.21 |
| -7 | 1 | 10 | 57.83 | 3.09 |
| -7 | 1 | 10 | 57.19 | 3.34 |
| -7 | 1 | 11 | 45.65 | 2.70 |
| -7 | 1 | 11 | 47.81 | 3.00 |
| -7 | 1 | 11 | 46.29 | 2.38 |
| -7 | 1 | 11 | 45.09 | 2.55 |
| -7 | 1 | 11 | 51.38 | 3.14 |
| -7 | 1 | 11 | 45.69 | 2.83 |
| -7 | 1 | 11 | 50.21 | 2.75 |
| -7 | 1 | 11 | 51.37 | 2.74 |
| -7 | 1 | 11 | 46.66 | 2.85 |
| -7 | 1 | 11 | 43.95 | 2.67 |
| -7 | 1 | 11 | 45.38 | 2.80 |
| -7 | 1 | 11 | 45.93 | 2.96 |
| -7 | 1 | 11 | 47.96 | 2.94 |
| -7 | 1 | 12 | 11.60 | 1.58 |
| -7 | 1 | 12 | 16.46 | 1.88 |
| -7 | 1 | 12 | 13.09 | 1.59 |
| -7 | 1 | 12 | 12.01 | 1.52 |
| -7 | 1 | 12 | 11.56 | 1.67 |
| -7 | 1 | 12 | 11.55 | 1.60 |
| -7 | 1 | 12 | 11.77 | 1.71 |
| -7 | 1 | 12 | 15.46 | 1.53 |
| -7 | 1 | 12 | 14.05 | 1.52 |
| -7 | 1 | 12 | 12.65 | 1.45 |
| -7 | 1 | 12 | 11.43 | 1.54 |
| -7 | 1 | 12 | 14.30 | 1.66 |
| -7 | 1 | 12 | 12.80 | 1.79 |
| -7 | 1 | 12 | 15.63 | 1.56 |
| -7 | 1 | 12 | 15.20 | 1.40 |
| -7 | 1 | 13 | 14.93 | 1.58 |
| -7 | 1 | 13 | 15.68 | 1.61 |
| -7 | 1 | 13 | 16.29 | 1.70 |
| -7 | 1 | 13 | 16.49 | 1.68 |
| -7 | 1 | 13 | 16.60 | 1.59 |
| -7 | 1 | 13 | 15.28 | 1.52 |
| -7 | 1 | 13 | 13.91 | 1.66 |
| -7 | 1 | 13 | 15.27 | 1.44 |
| -7 | 1 | 13 | 17.67 | 1.83 |

## CIF 31

|    |   |    |        |       |
|----|---|----|--------|-------|
| -7 | 1 | 14 | 29.66  | 1.78  |
| -7 | 1 | 14 | 29.48  | 1.87  |
| -7 | 1 | 14 | 29.43  | 1.84  |
| -7 | 1 | 14 | 29.70  | 1.76  |
| -7 | 1 | 14 | 30.85  | 1.93  |
| -7 | 1 | 14 | 31.42  | 1.56  |
| -7 | 1 | 15 | 140.21 | 3.17  |
| -7 | 1 | 15 | 133.51 | 2.93  |
| -7 | 1 | 15 | 139.82 | 2.93  |
| -7 | 2 | -9 | 2.92   | 3.01  |
| -7 | 2 | -9 | 4.27   | 2.51  |
| -7 | 2 | -9 | 2.78   | 3.33  |
| -7 | 2 | -9 | 2.19   | 3.77  |
| -7 | 2 | -8 | 101.68 | 3.03  |
| -7 | 2 | -8 | 103.90 | 3.22  |
| -7 | 2 | -8 | 109.28 | 3.92  |
| -7 | 2 | -8 | 102.06 | 3.25  |
| -7 | 2 | -8 | 102.62 | 3.26  |
| -7 | 2 | -8 | 109.71 | 3.54  |
| -7 | 2 | -7 | 1.62   | 1.20  |
| -7 | 2 | -7 | 1.49   | 1.04  |
| -7 | 2 | -7 | 4.21   | 6.53  |
| -7 | 2 | -7 | 1.94   | 1.08  |
| -7 | 2 | -7 | 1.69   | 1.02  |
| -7 | 2 | -7 | 1.71   | 0.75  |
| -7 | 2 | -7 | 1.21   | 0.95  |
| -7 | 2 | -7 | 1.66   | 1.09  |
| -7 | 2 | -6 | 6.12   | 1.15  |
| -7 | 2 | -6 | 5.68   | 1.37  |
| -7 | 2 | -6 | 9.67   | 3.02  |
| -7 | 2 | -6 | 4.82   | 1.20  |
| -7 | 2 | -6 | 8.27   | 6.32  |
| -7 | 2 | -6 | 4.18   | 0.95  |
| -7 | 2 | -6 | 5.16   | 1.31  |
| -7 | 2 | -5 | 339.91 | 7.32  |
| -7 | 2 | -5 | 346.03 | 7.18  |
| -7 | 2 | -5 | 309.96 | 10.22 |
| -7 | 2 | -5 | 348.62 | 7.46  |
| -7 | 2 | -5 | 359.43 | 7.06  |
| -7 | 2 | -5 | 309.84 | 8.90  |
| -7 | 2 | -5 | 343.78 | 6.46  |

## CIF 31

|    |   |    |         |       |
|----|---|----|---------|-------|
| -7 | 2 | -5 | 347.73  | 7.34  |
| -7 | 2 | -5 | 318.00  | 6.28  |
| -7 | 2 | -4 | 1178.23 | 14.12 |
| -7 | 2 | -4 | 1130.09 | 15.56 |
| -7 | 2 | -4 | 1173.29 | 15.50 |
| -7 | 2 | -4 | 1099.80 | 18.03 |
| -7 | 2 | -4 | 1237.43 | 14.92 |
| -7 | 2 | -4 | 1097.68 | 15.27 |
| -7 | 2 | -4 | 1083.72 | 17.33 |
| -7 | 2 | -4 | 1143.41 | 15.29 |
| -7 | 2 | -4 | 1120.97 | 14.92 |
| -7 | 2 | -3 | 365.25  | 6.87  |
| -7 | 2 | -3 | 358.42  | 7.22  |
| -7 | 2 | -3 | 355.67  | 7.41  |
| -7 | 2 | -3 | 351.70  | 7.44  |
| -7 | 2 | -3 | 367.35  | 7.44  |
| -7 | 2 | -3 | 378.36  | 10.00 |
| -7 | 2 | -2 | 2180.55 | 23.00 |
| -7 | 2 | -2 | 2087.76 | 23.20 |
| -7 | 2 | -2 | 2105.90 | 23.17 |
| -7 | 2 | -2 | 2164.98 | 23.10 |
| -7 | 2 | -2 | 2124.49 | 23.09 |
| -7 | 2 | -2 | 2117.96 | 24.14 |
| -7 | 2 | -1 | 981.70  | 15.19 |
| -7 | 2 | -1 | 987.92  | 12.91 |
| -7 | 2 | -1 | 999.68  | 13.37 |
| -7 | 2 | -1 | 1027.65 | 14.76 |
| -7 | 2 | -1 | 1006.90 | 13.28 |
| -7 | 2 | 0  | 12.40   | 1.31  |
| -7 | 2 | 0  | 7.13    | 1.46  |
| -7 | 2 | 0  | 5.75    | 1.51  |
| -7 | 2 | 0  | 11.06   | 1.21  |
| -7 | 2 | 0  | 6.66    | 1.24  |
| -7 | 2 | 0  | 9.31    | 1.53  |
| -7 | 2 | 0  | 6.70    | 1.40  |
| -7 | 2 | 0  | 10.41   | 1.15  |
| -7 | 2 | 1  | 35.59   | 2.63  |
| -7 | 2 | 1  | 33.16   | 2.72  |
| -7 | 2 | 1  | 32.81   | 2.03  |
| -7 | 2 | 1  | 29.93   | 1.76  |
| -7 | 2 | 1  | 31.03   | 1.89  |

## CIF 31

|    |   |   |         |       |
|----|---|---|---------|-------|
| -7 | 2 | 1 | 33.32   | 2.63  |
| -7 | 2 | 1 | 33.40   | 2.47  |
| -7 | 2 | 1 | 31.50   | 2.46  |
| -7 | 2 | 2 | 1053.77 | 16.82 |
| -7 | 2 | 2 | 1104.29 | 14.34 |
| -7 | 2 | 2 | 1142.05 | 14.66 |
| -7 | 2 | 2 | 1217.72 | 14.65 |
| -7 | 2 | 2 | 1156.50 | 16.36 |
| -7 | 2 | 2 | 1105.77 | 16.27 |
| -7 | 2 | 2 | 1117.43 | 15.97 |
| -7 | 2 | 2 | 1056.64 | 12.87 |
| -7 | 2 | 2 | 1133.22 | 13.80 |
| -7 | 2 | 2 | 1113.99 | 15.98 |
| -7 | 2 | 2 | 1120.66 | 13.55 |
| -7 | 2 | 2 | 1097.27 | 15.72 |
| -7 | 2 | 3 | 8.94    | 1.28  |
| -7 | 2 | 3 | 11.27   | 1.78  |
| -7 | 2 | 3 | 8.32    | 1.34  |
| -7 | 2 | 3 | 7.82    | 1.21  |
| -7 | 2 | 3 | 8.45    | 1.24  |
| -7 | 2 | 3 | 9.06    | 1.78  |
| -7 | 2 | 3 | 7.97    | 1.11  |
| -7 | 2 | 3 | 8.60    | 1.58  |
| -7 | 2 | 3 | 8.22    | 1.50  |
| -7 | 2 | 3 | 12.40   | 1.66  |
| -7 | 2 | 4 | 300.87  | 5.88  |
| -7 | 2 | 4 | 266.48  | 6.21  |
| -7 | 2 | 4 | 283.42  | 8.05  |
| -7 | 2 | 4 | 307.38  | 6.09  |
| -7 | 2 | 4 | 305.08  | 5.98  |
| -7 | 2 | 4 | 293.03  | 7.35  |
| -7 | 2 | 4 | 319.38  | 7.62  |
| -7 | 2 | 4 | 301.97  | 6.69  |
| -7 | 2 | 4 | 322.52  | 6.91  |
| -7 | 2 | 4 | 309.27  | 7.41  |
| -7 | 2 | 4 | 312.73  | 6.68  |
| -7 | 2 | 5 | 98.34   | 4.28  |
| -7 | 2 | 5 | 109.64  | 3.62  |
| -7 | 2 | 5 | 109.83  | 3.95  |
| -7 | 2 | 5 | 115.50  | 3.68  |
| -7 | 2 | 5 | 105.49  | 4.35  |

## CIF 31

|    |   |   |        |      |
|----|---|---|--------|------|
| -7 | 2 | 5 | 108.62 | 3.89 |
| -7 | 2 | 5 | 110.45 | 4.28 |
| -7 | 2 | 5 | 102.89 | 4.20 |
| -7 | 2 | 5 | 111.83 | 4.03 |
| -7 | 2 | 5 | 103.76 | 3.36 |
| -7 | 2 | 5 | 113.16 | 3.46 |
| -7 | 2 | 5 | 97.90  | 4.28 |
| -7 | 2 | 5 | 102.52 | 3.92 |
| -7 | 2 | 5 | 106.80 | 4.30 |
| -7 | 2 | 6 | 35.53  | 2.51 |
| -7 | 2 | 6 | 28.56  | 2.80 |
| -7 | 2 | 6 | 30.23  | 2.51 |
| -7 | 2 | 6 | 39.61  | 2.35 |
| -7 | 2 | 6 | 36.44  | 2.14 |
| -7 | 2 | 6 | 33.64  | 2.54 |
| -7 | 2 | 6 | 44.09  | 2.42 |
| -7 | 2 | 6 | 33.85  | 2.53 |
| -7 | 2 | 6 | 36.03  | 2.46 |
| -7 | 2 | 6 | 42.68  | 2.52 |
| -7 | 2 | 6 | 32.01  | 2.57 |
| -7 | 2 | 6 | 38.31  | 2.69 |
| -7 | 2 | 6 | 37.49  | 2.24 |
| -7 | 2 | 6 | 42.80  | 2.69 |
| -7 | 2 | 6 | 36.11  | 2.52 |
| -7 | 2 | 7 | 15.69  | 1.93 |
| -7 | 2 | 7 | 14.01  | 1.47 |
| -7 | 2 | 7 | 17.84  | 2.06 |
| -7 | 2 | 7 | 17.32  | 1.76 |
| -7 | 2 | 7 | 11.58  | 1.58 |
| -7 | 2 | 7 | 14.27  | 1.53 |
| -7 | 2 | 7 | 20.42  | 2.50 |
| -7 | 2 | 7 | 11.27  | 1.45 |
| -7 | 2 | 7 | 12.56  | 1.69 |
| -7 | 2 | 7 | 25.17  | 2.18 |
| -7 | 2 | 7 | 15.58  | 2.00 |
| -7 | 2 | 7 | 14.53  | 1.85 |
| -7 | 2 | 7 | 11.43  | 1.50 |
| -7 | 2 | 7 | 13.99  | 1.76 |
| -7 | 2 | 7 | 15.26  | 1.53 |
| -7 | 2 | 7 | 12.01  | 1.67 |
| -7 | 2 | 7 | 14.19  | 1.62 |

## CIF 31

|    |   |    |        |       |
|----|---|----|--------|-------|
| -7 | 2 | 8  | 862.07 | 13.21 |
| -7 | 2 | 8  | 885.83 | 13.02 |
| -7 | 2 | 8  | 897.25 | 13.04 |
| -7 | 2 | 8  | 886.77 | 12.78 |
| -7 | 2 | 8  | 923.11 | 12.91 |
| -7 | 2 | 8  | 883.43 | 14.45 |
| -7 | 2 | 8  | 898.96 | 14.18 |
| -7 | 2 | 8  | 837.23 | 12.82 |
| -7 | 2 | 8  | 901.74 | 15.84 |
| -7 | 2 | 8  | 888.60 | 14.21 |
| -7 | 2 | 8  | 889.46 | 13.15 |
| -7 | 2 | 8  | 942.42 | 14.35 |
| -7 | 2 | 8  | 877.97 | 14.26 |
| -7 | 2 | 8  | 905.49 | 13.75 |
| -7 | 2 | 8  | 857.85 | 14.39 |
| -7 | 2 | 8  | 813.62 | 13.49 |
| -7 | 2 | 9  | 8.55   | 1.59  |
| -7 | 2 | 9  | 9.96   | 1.49  |
| -7 | 2 | 9  | 7.92   | 1.51  |
| -7 | 2 | 9  | 9.04   | 1.68  |
| -7 | 2 | 9  | 5.96   | 1.63  |
| -7 | 2 | 9  | 9.98   | 1.79  |
| -7 | 2 | 9  | 5.37   | 1.24  |
| -7 | 2 | 9  | 8.93   | 1.47  |
| -7 | 2 | 9  | 8.62   | 1.76  |
| -7 | 2 | 9  | 11.58  | 2.05  |
| -7 | 2 | 9  | 8.27   | 1.40  |
| -7 | 2 | 9  | 7.79   | 1.66  |
| -7 | 2 | 9  | 7.39   | 1.30  |
| -7 | 2 | 9  | 7.36   | 1.64  |
| -7 | 2 | 9  | 6.80   | 1.34  |
| -7 | 2 | 9  | 6.33   | 1.31  |
| -7 | 2 | 10 | 244.58 | 6.46  |
| -7 | 2 | 10 | 252.78 | 7.00  |
| -7 | 2 | 10 | 216.50 | 5.95  |
| -7 | 2 | 10 | 211.27 | 6.90  |
| -7 | 2 | 10 | 227.63 | 6.60  |
| -7 | 2 | 10 | 225.00 | 6.51  |
| -7 | 2 | 10 | 235.89 | 6.00  |
| -7 | 2 | 10 | 229.33 | 6.75  |
| -7 | 2 | 10 | 227.72 | 6.74  |



## CIF 31

|    |   |    |        |      |
|----|---|----|--------|------|
| -7 | 2 | 10 | 231.18 | 6.10 |
| -7 | 2 | 10 | 233.77 | 6.42 |
| -7 | 2 | 10 | 249.24 | 7.02 |
| -7 | 2 | 10 | 239.94 | 6.26 |
| -7 | 2 | 10 | 245.94 | 6.69 |
| -7 | 2 | 10 | 230.52 | 5.58 |
| -7 | 2 | 10 | 252.85 | 6.25 |
| -7 | 2 | 11 | 129.86 | 4.41 |
| -7 | 2 | 11 | 128.51 | 4.66 |
| -7 | 2 | 11 | 128.62 | 4.70 |
| -7 | 2 | 11 | 132.08 | 4.81 |
| -7 | 2 | 11 | 138.73 | 4.54 |
| -7 | 2 | 11 | 138.16 | 5.18 |
| -7 | 2 | 11 | 126.54 | 4.02 |
| -7 | 2 | 11 | 135.27 | 5.06 |
| -7 | 2 | 11 | 144.55 | 4.70 |
| -7 | 2 | 11 | 122.15 | 4.93 |
| -7 | 2 | 11 | 131.39 | 4.50 |
| -7 | 2 | 11 | 132.25 | 4.42 |
| -7 | 2 | 11 | 132.37 | 4.21 |
| -7 | 2 | 11 | 128.37 | 4.52 |
| -7 | 2 | 12 | 13.17  | 1.64 |
| -7 | 2 | 12 | 11.12  | 1.48 |
| -7 | 2 | 12 | 10.90  | 1.51 |
| -7 | 2 | 12 | 14.63  | 1.54 |
| -7 | 2 | 12 | 13.24  | 1.53 |
| -7 | 2 | 12 | 12.12  | 1.65 |
| -7 | 2 | 12 | 12.80  | 1.38 |
| -7 | 2 | 12 | 11.72  | 1.34 |
| -7 | 2 | 12 | 12.67  | 1.48 |
| -7 | 2 | 12 | 10.61  | 1.50 |
| -7 | 2 | 12 | 11.56  | 1.68 |
| -7 | 2 | 12 | 11.92  | 1.24 |
| -7 | 2 | 13 | 192.88 | 4.88 |
| -7 | 2 | 13 | 198.44 | 4.99 |
| -7 | 2 | 13 | 189.09 | 5.25 |
| -7 | 2 | 13 | 196.84 | 4.36 |
| -7 | 2 | 13 | 200.61 | 5.22 |
| -7 | 2 | 13 | 205.89 | 5.38 |
| -7 | 2 | 13 | 189.59 | 4.96 |
| -7 | 2 | 13 | 201.55 | 5.29 |

## CIF 31

|    |   |     |         |       |
|----|---|-----|---------|-------|
| -7 | 2 | 14  | 40.43   | 2.04  |
| -7 | 2 | 14  | 41.72   | 2.14  |
| -7 | 2 | 14  | 43.87   | 2.10  |
| -7 | 2 | 14  | 43.06   | 1.95  |
| -7 | 2 | 14  | 41.98   | 1.91  |
| -7 | 2 | 14  | 46.34   | 2.21  |
| -7 | 3 | -10 | 6.10    | 2.11  |
| -7 | 3 | -9  | 34.79   | 3.20  |
| -7 | 3 | -9  | 34.31   | 2.47  |
| -7 | 3 | -9  | 30.12   | 1.83  |
| -7 | 3 | -9  | 34.31   | 2.74  |
| -7 | 3 | -8  | 181.67  | 4.59  |
| -7 | 3 | -8  | 178.13  | 3.96  |
| -7 | 3 | -8  | 182.53  | 4.38  |
| -7 | 3 | -8  | 182.20  | 4.10  |
| -7 | 3 | -8  | 185.91  | 4.54  |
| -7 | 3 | -8  | 193.00  | 4.84  |
| -7 | 3 | -7  | 56.07   | 2.94  |
| -7 | 3 | -7  | 56.78   | 2.73  |
| -7 | 3 | -7  | 52.86   | 6.07  |
| -7 | 3 | -7  | 53.58   | 2.78  |
| -7 | 3 | -7  | 58.28   | 2.73  |
| -7 | 3 | -7  | 41.96   | 6.58  |
| -7 | 3 | -7  | 56.08   | 2.85  |
| -7 | 3 | -7  | 56.45   | 2.57  |
| -7 | 3 | -7  | 55.52   | 2.41  |
| -7 | 3 | -6  | 174.25  | 5.24  |
| -7 | 3 | -6  | 183.01  | 5.34  |
| -7 | 3 | -6  | 181.75  | 4.54  |
| -7 | 3 | -6  | 178.91  | 5.06  |
| -7 | 3 | -6  | 174.16  | 4.99  |
| -7 | 3 | -6  | 170.20  | 4.56  |
| -7 | 3 | -5  | 1.26    | 1.20  |
| -7 | 3 | -5  | 0.77    | 1.02  |
| -7 | 3 | -5  | 0.90    | 0.75  |
| -7 | 3 | -5  | 1.75    | 1.01  |
| -7 | 3 | -5  | 0.92    | 3.59  |
| -7 | 3 | -5  | 0.33    | 1.14  |
| -7 | 3 | -5  | 1.57    | 1.04  |
| -7 | 3 | -5  | 1.13    | 1.17  |
| -7 | 3 | -4  | 1448.40 | 16.90 |

## CIF 31

|    |   |    |         |       |
|----|---|----|---------|-------|
| -7 | 3 | -4 | 1490.34 | 18.13 |
| -7 | 3 | -4 | 1320.63 | 18.82 |
| -7 | 3 | -4 | 1399.45 | 18.05 |
| -7 | 3 | -4 | 1488.81 | 17.80 |
| -7 | 3 | -4 | 1410.12 | 21.49 |
| -7 | 3 | -4 | 1507.91 | 18.26 |
| -7 | 3 | -3 | 109.13  | 3.90  |
| -7 | 3 | -3 | 111.35  | 4.08  |
| -7 | 3 | -3 | 136.79  | 7.31  |
| -7 | 3 | -3 | 104.25  | 3.79  |
| -7 | 3 | -3 | 103.79  | 3.87  |
| -7 | 3 | -3 | 103.18  | 3.41  |
| -7 | 3 | -3 | 135.80  | 5.71  |
| -7 | 3 | -3 | 101.83  | 3.76  |
| -7 | 3 | -2 | 1147.02 | 15.97 |
| -7 | 3 | -2 | 1162.49 | 14.78 |
| -7 | 3 | -2 | 1151.63 | 15.67 |
| -7 | 3 | -2 | 1128.52 | 14.69 |
| -7 | 3 | -2 | 1124.98 | 13.69 |
| -7 | 3 | -2 | 1142.58 | 14.60 |
| -7 | 3 | -1 | 23.54   | 2.21  |
| -7 | 3 | -1 | 20.76   | 1.47  |
| -7 | 3 | -1 | 22.73   | 2.02  |
| -7 | 3 | -1 | 18.53   | 2.03  |
| -7 | 3 | -1 | 22.95   | 1.68  |
| -7 | 3 | -1 | 19.71   | 1.66  |
| -7 | 3 | 0  | 1375.28 | 16.39 |
| -7 | 3 | 0  | 1377.16 | 18.57 |
| -7 | 3 | 0  | 1371.30 | 18.41 |
| -7 | 3 | 0  | 1386.19 | 18.02 |
| -7 | 3 | 0  | 1394.25 | 18.42 |
| -7 | 3 | 0  | 1391.98 | 16.06 |
| -7 | 3 | 0  | 1367.59 | 15.53 |
| -7 | 3 | 0  | 1358.49 | 14.28 |
| -7 | 3 | 0  | 1314.60 | 18.53 |
| -7 | 3 | 1  | 1001.40 | 13.22 |
| -7 | 3 | 1  | 1077.83 | 13.26 |
| -7 | 3 | 1  | 1093.72 | 11.92 |
| -7 | 3 | 1  | 971.19  | 14.63 |
| -7 | 3 | 1  | 1010.64 | 12.80 |
| -7 | 3 | 1  | 1033.60 | 14.94 |

## CIF 31

|    |   |   |         |       |
|----|---|---|---------|-------|
| -7 | 3 | 1 | 1008.76 | 15.63 |
| -7 | 3 | 1 | 1035.34 | 15.35 |
| -7 | 3 | 1 | 1075.66 | 15.42 |
| -7 | 3 | 1 | 1000.50 | 12.48 |
| -7 | 3 | 1 | 1069.52 | 15.57 |
| -7 | 3 | 2 | 814.97  | 13.18 |
| -7 | 3 | 2 | 785.63  | 12.62 |
| -7 | 3 | 2 | 757.73  | 12.63 |
| -7 | 3 | 2 | 809.98  | 13.09 |
| -7 | 3 | 2 | 845.44  | 13.33 |
| -7 | 3 | 2 | 767.99  | 12.60 |
| -7 | 3 | 2 | 783.62  | 10.98 |
| -7 | 3 | 2 | 773.21  | 13.59 |
| -7 | 3 | 2 | 805.32  | 11.08 |
| -7 | 3 | 3 | 198.65  | 6.41  |
| -7 | 3 | 3 | 193.30  | 6.01  |
| -7 | 3 | 3 | 204.09  | 5.89  |
| -7 | 3 | 3 | 197.26  | 4.97  |
| -7 | 3 | 3 | 207.85  | 6.01  |
| -7 | 3 | 3 | 196.04  | 5.97  |
| -7 | 3 | 3 | 203.00  | 5.46  |
| -7 | 3 | 3 | 208.18  | 6.05  |
| -7 | 3 | 3 | 189.36  | 4.80  |
| -7 | 3 | 3 | 207.36  | 5.11  |
| -7 | 3 | 4 | 87.21   | 4.02  |
| -7 | 3 | 4 | 98.14   | 3.61  |
| -7 | 3 | 4 | 94.46   | 3.48  |
| -7 | 3 | 4 | 98.29   | 3.45  |
| -7 | 3 | 4 | 104.11  | 3.66  |
| -7 | 3 | 4 | 94.37   | 3.53  |
| -7 | 3 | 4 | 92.83   | 4.02  |
| -7 | 3 | 4 | 88.67   | 4.34  |
| -7 | 3 | 4 | 93.62   | 4.13  |
| -7 | 3 | 4 | 90.54   | 4.07  |
| -7 | 3 | 4 | 107.51  | 4.40  |
| -7 | 3 | 4 | 90.17   | 3.77  |
| -7 | 3 | 4 | 94.74   | 4.13  |
| -7 | 3 | 5 | 344.15  | 7.29  |
| -7 | 3 | 5 | 345.89  | 6.55  |
| -7 | 3 | 5 | 347.05  | 8.11  |
| -7 | 3 | 5 | 349.45  | 7.19  |

## CIF 31

|    |   |   |        |       |
|----|---|---|--------|-------|
| -7 | 3 | 5 | 338.89 | 7.90  |
| -7 | 3 | 5 | 359.23 | 7.31  |
| -7 | 3 | 5 | 352.07 | 8.09  |
| -7 | 3 | 5 | 343.64 | 7.26  |
| -7 | 3 | 5 | 339.08 | 8.10  |
| -7 | 3 | 5 | 351.97 | 7.07  |
| -7 | 3 | 5 | 340.80 | 7.31  |
| -7 | 3 | 5 | 339.96 | 7.68  |
| -7 | 3 | 6 | 19.45  | 2.37  |
| -7 | 3 | 6 | 19.87  | 1.69  |
| -7 | 3 | 6 | 22.14  | 2.23  |
| -7 | 3 | 6 | 25.21  | 2.44  |
| -7 | 3 | 6 | 21.87  | 1.86  |
| -7 | 3 | 6 | 19.92  | 1.76  |
| -7 | 3 | 6 | 21.10  | 2.05  |
| -7 | 3 | 6 | 21.59  | 1.96  |
| -7 | 3 | 6 | 19.59  | 2.09  |
| -7 | 3 | 6 | 21.44  | 1.89  |
| -7 | 3 | 6 | 18.16  | 1.86  |
| -7 | 3 | 6 | 19.14  | 2.02  |
| -7 | 3 | 6 | 17.25  | 1.90  |
| -7 | 3 | 6 | 21.14  | 1.95  |
| -7 | 3 | 6 | 22.64  | 2.30  |
| -7 | 3 | 6 | 21.22  | 1.60  |
| -7 | 3 | 7 | 19.41  | 1.78  |
| -7 | 3 | 7 | 21.67  | 1.90  |
| -7 | 3 | 7 | 18.04  | 2.14  |
| -7 | 3 | 7 | 16.22  | 1.82  |
| -7 | 3 | 7 | 21.85  | 1.78  |
| -7 | 3 | 7 | 18.43  | 1.93  |
| -7 | 3 | 7 | 15.90  | 1.78  |
| -7 | 3 | 7 | 17.75  | 2.00  |
| -7 | 3 | 7 | 19.18  | 1.80  |
| -7 | 3 | 7 | 18.28  | 2.11  |
| -7 | 3 | 7 | 16.62  | 2.35  |
| -7 | 3 | 7 | 19.22  | 2.26  |
| -7 | 3 | 7 | 20.39  | 1.86  |
| -7 | 3 | 7 | 20.16  | 2.02  |
| -7 | 3 | 7 | 22.58  | 2.25  |
| -7 | 3 | 7 | 17.49  | 1.99  |
| -7 | 3 | 8 | 763.76 | 11.87 |

CIF 31

|    |   |    |        |       |
|----|---|----|--------|-------|
| -7 | 3 | 8  | 770.27 | 11.57 |
| -7 | 3 | 8  | 731.19 | 11.47 |
| -7 | 3 | 8  | 737.69 | 11.93 |
| -7 | 3 | 8  | 715.29 | 12.35 |
| -7 | 3 | 8  | 728.15 | 12.89 |
| -7 | 3 | 8  | 714.56 | 13.11 |
| -7 | 3 | 8  | 657.96 | 12.58 |
| -7 | 3 | 8  | 709.69 | 12.33 |
| -7 | 3 | 8  | 710.57 | 11.52 |
| -7 | 3 | 8  | 747.60 | 13.10 |
| -7 | 3 | 8  | 783.16 | 13.06 |
| -7 | 3 | 8  | 695.86 | 12.31 |
| -7 | 3 | 8  | 740.92 | 11.14 |
| -7 | 3 | 8  | 693.87 | 13.78 |
| -7 | 3 | 8  | 664.74 | 12.48 |
| -7 | 3 | 8  | 753.87 | 11.64 |
| -7 | 3 | 9  | 227.34 | 7.43  |
| -7 | 3 | 9  | 242.55 | 6.79  |
| -7 | 3 | 9  | 269.39 | 6.15  |
| -7 | 3 | 9  | 235.43 | 6.94  |
| -7 | 3 | 9  | 246.29 | 6.95  |
| -7 | 3 | 9  | 237.92 | 6.45  |
| -7 | 3 | 9  | 228.25 | 6.15  |
| -7 | 3 | 9  | 250.31 | 6.23  |
| -7 | 3 | 9  | 241.28 | 6.97  |
| -7 | 3 | 9  | 222.12 | 6.93  |
| -7 | 3 | 9  | 235.87 | 6.88  |
| -7 | 3 | 9  | 242.59 | 6.06  |
| -7 | 3 | 9  | 268.66 | 6.62  |
| -7 | 3 | 9  | 233.74 | 6.83  |
| -7 | 3 | 9  | 219.06 | 6.29  |
| -7 | 3 | 10 | 370.53 | 7.73  |
| -7 | 3 | 10 | 382.74 | 7.40  |
| -7 | 3 | 10 | 332.52 | 8.24  |
| -7 | 3 | 10 | 410.59 | 8.05  |
| -7 | 3 | 10 | 354.57 | 8.28  |
| -7 | 3 | 10 | 405.84 | 9.16  |
| -7 | 3 | 10 | 365.78 | 8.57  |
| -7 | 3 | 10 | 366.94 | 8.31  |
| -7 | 3 | 10 | 359.71 | 8.64  |
| -7 | 3 | 10 | 377.00 | 8.72  |

## CIF 31

|    |   |     |        |      |
|----|---|-----|--------|------|
| -7 | 3 | 10  | 386.07 | 8.87 |
| -7 | 3 | 10  | 366.71 | 9.09 |
| -7 | 3 | 10  | 372.89 | 8.10 |
| -7 | 3 | 10  | 385.04 | 8.78 |
| -7 | 3 | 10  | 369.01 | 7.93 |
| -7 | 3 | 11  | 0.05   | 0.98 |
| -7 | 3 | 11  | 1.56   | 0.96 |
| -7 | 3 | 11  | 0.89   | 0.90 |
| -7 | 3 | 11  | -0.04  | 0.73 |
| -7 | 3 | 11  | 0.63   | 1.10 |
| -7 | 3 | 11  | 0.58   | 0.93 |
| -7 | 3 | 11  | 0.98   | 1.30 |
| -7 | 3 | 11  | 0.26   | 0.95 |
| -7 | 3 | 11  | 0.15   | 1.27 |
| -7 | 3 | 11  | 0.29   | 0.97 |
| -7 | 3 | 11  | 1.53   | 0.98 |
| -7 | 3 | 12  | 14.26  | 1.40 |
| -7 | 3 | 12  | 16.62  | 1.77 |
| -7 | 3 | 12  | 12.41  | 1.53 |
| -7 | 3 | 12  | 16.31  | 1.84 |
| -7 | 3 | 12  | 14.15  | 1.72 |
| -7 | 3 | 12  | 15.03  | 1.58 |
| -7 | 3 | 12  | 15.13  | 1.79 |
| -7 | 3 | 12  | 16.74  | 1.66 |
| -7 | 3 | 12  | 15.21  | 1.57 |
| -7 | 3 | 12  | 15.55  | 1.53 |
| -7 | 3 | 13  | 18.83  | 1.74 |
| -7 | 3 | 13  | 18.91  | 1.68 |
| -7 | 3 | 13  | 17.09  | 1.46 |
| -7 | 3 | 13  | 17.70  | 1.59 |
| -7 | 3 | 13  | 18.28  | 1.63 |
| -7 | 3 | 13  | 18.33  | 1.45 |
| -7 | 3 | 14  | 15.79  | 1.27 |
| -7 | 3 | 14  | 15.89  | 1.26 |
| -7 | 3 | 14  | 13.33  | 1.03 |
| -7 | 4 | -10 | 7.05   | 2.98 |
| -7 | 4 | -10 | 9.41   | 1.03 |
| -7 | 4 | -10 | 9.50   | 1.96 |
| -7 | 4 | -9  | 67.88  | 2.24 |
| -7 | 4 | -9  | 74.21  | 3.23 |
| -7 | 4 | -9  | 65.23  | 2.35 |

## CIF 31

|    |   |    |        |      |
|----|---|----|--------|------|
| -7 | 4 | -9 | 73.71  | 2.65 |
| -7 | 4 | -8 | 4.19   | 1.00 |
| -7 | 4 | -8 | 4.24   | 4.04 |
| -7 | 4 | -8 | 4.25   | 1.08 |
| -7 | 4 | -8 | 4.03   | 0.88 |
| -7 | 4 | -8 | 4.19   | 1.20 |
| -7 | 4 | -8 | 4.55   | 1.27 |
| -7 | 4 | -7 | 2.30   | 1.04 |
| -7 | 4 | -7 | 3.07   | 1.15 |
| -7 | 4 | -7 | 5.78   | 2.84 |
| -7 | 4 | -7 | 2.52   | 1.32 |
| -7 | 4 | -7 | 3.00   | 1.15 |
| -7 | 4 | -7 | 2.12   | 0.99 |
| -7 | 4 | -6 | 285.05 | 6.58 |
| -7 | 4 | -6 | 264.44 | 6.06 |
| -7 | 4 | -6 | 265.26 | 6.65 |
| -7 | 4 | -6 | 241.71 | 6.31 |
| -7 | 4 | -6 | 253.04 | 6.92 |
| -7 | 4 | -6 | 273.27 | 6.40 |
| -7 | 4 | -5 | 0.33   | 1.09 |
| -7 | 4 | -5 | 2.18   | 1.66 |
| -7 | 4 | -5 | -0.04  | 0.91 |
| -7 | 4 | -5 | 0.41   | 1.06 |
| -7 | 4 | -5 | 0.50   | 1.18 |
| -7 | 4 | -4 | 389.98 | 7.44 |
| -7 | 4 | -4 | 405.97 | 7.98 |
| -7 | 4 | -4 | 392.62 | 7.91 |
| -7 | 4 | -3 | 11.47  | 1.62 |
| -7 | 4 | -3 | 12.35  | 1.49 |
| -7 | 4 | -3 | 11.05  | 1.51 |
| -7 | 4 | -3 | 11.24  | 1.56 |
| -7 | 4 | -3 | 12.11  | 1.37 |
| -7 | 4 | -3 | 13.54  | 1.66 |
| -7 | 4 | -3 | 11.88  | 1.53 |
| -7 | 4 | -2 | 60.37  | 2.85 |
| -7 | 4 | -2 | 59.82  | 2.85 |
| -7 | 4 | -2 | 61.72  | 3.37 |
| -7 | 4 | -2 | 61.97  | 2.85 |
| -7 | 4 | -2 | 66.24  | 2.72 |
| -7 | 4 | -2 | 63.66  | 2.82 |
| -7 | 4 | -2 | 69.13  | 3.34 |



## CIF 31

|    |   |    |        |       |
|----|---|----|--------|-------|
| -7 | 4 | -1 | 99.74  | 3.34  |
| -7 | 4 | -1 | 108.02 | 3.93  |
| -7 | 4 | -1 | 98.95  | 3.49  |
| -7 | 4 | -1 | 105.59 | 4.14  |
| -7 | 4 | -1 | 101.22 | 2.85  |
| -7 | 4 | -1 | 101.90 | 3.55  |
| -7 | 4 | -1 | 95.34  | 4.21  |
| -7 | 4 | -1 | 93.98  | 3.47  |
| -7 | 4 | -1 | 98.00  | 4.78  |
| -7 | 4 | -1 | 98.05  | 3.39  |
| -7 | 4 | -1 | 102.17 | 4.13  |
| -7 | 4 | 0  | 109.86 | 4.19  |
| -7 | 4 | 0  | 113.34 | 4.32  |
| -7 | 4 | 0  | 123.38 | 3.61  |
| -7 | 4 | 0  | 112.29 | 4.16  |
| -7 | 4 | 0  | 116.74 | 4.58  |
| -7 | 4 | 0  | 109.34 | 4.29  |
| -7 | 4 | 0  | 109.50 | 4.50  |
| -7 | 4 | 0  | 117.28 | 3.11  |
| -7 | 4 | 0  | 110.42 | 4.52  |
| -7 | 4 | 0  | 132.76 | 3.89  |
| -7 | 4 | 0  | 122.98 | 3.46  |
| -7 | 4 | 0  | 87.85  | 4.44  |
| -7 | 4 | 1  | 20.22  | 2.11  |
| -7 | 4 | 1  | 20.09  | 2.23  |
| -7 | 4 | 1  | 23.00  | 2.03  |
| -7 | 4 | 1  | 22.88  | 2.10  |
| -7 | 4 | 1  | 25.09  | 1.83  |
| -7 | 4 | 1  | 23.91  | 1.69  |
| -7 | 4 | 1  | 21.25  | 2.03  |
| -7 | 4 | 1  | 23.03  | 2.05  |
| -7 | 4 | 1  | 23.04  | 1.53  |
| -7 | 4 | 1  | 20.42  | 2.15  |
| -7 | 4 | 1  | 19.81  | 2.20  |
| -7 | 4 | 1  | 24.01  | 1.48  |
| -7 | 4 | 2  | 501.99 | 10.32 |
| -7 | 4 | 2  | 532.39 | 9.95  |
| -7 | 4 | 2  | 529.47 | 10.06 |
| -7 | 4 | 2  | 533.06 | 8.20  |
| -7 | 4 | 2  | 557.80 | 10.37 |
| -7 | 4 | 2  | 563.65 | 9.06  |

CIF 31

|    |   |   |         |       |
|----|---|---|---------|-------|
| -7 | 4 | 2 | 561.56  | 10.97 |
| -7 | 4 | 2 | 546.49  | 10.49 |
| -7 | 4 | 3 | 2029.40 | 23.92 |
| -7 | 4 | 3 | 2000.46 | 24.30 |
| -7 | 4 | 3 | 1982.40 | 22.88 |
| -7 | 4 | 3 | 2038.75 | 25.07 |
| -7 | 4 | 3 | 2021.97 | 21.68 |
| -7 | 4 | 3 | 1930.45 | 20.02 |
| -7 | 4 | 3 | 2108.90 | 22.44 |
| -7 | 4 | 3 | 2144.94 | 24.44 |
| -7 | 4 | 3 | 1970.69 | 20.76 |
| -7 | 4 | 3 | 2031.30 | 24.90 |
| -7 | 4 | 3 | 2034.26 | 24.48 |
| -7 | 4 | 4 | 223.88  | 6.51  |
| -7 | 4 | 4 | 220.25  | 6.34  |
| -7 | 4 | 4 | 208.01  | 6.40  |
| -7 | 4 | 4 | 219.21  | 6.75  |
| -7 | 4 | 4 | 204.93  | 6.12  |
| -7 | 4 | 4 | 210.96  | 5.97  |
| -7 | 4 | 4 | 205.99  | 5.22  |
| -7 | 4 | 4 | 208.18  | 6.18  |
| -7 | 4 | 4 | 221.47  | 5.37  |
| -7 | 4 | 4 | 203.48  | 4.35  |
| -7 | 4 | 4 | 185.20  | 5.95  |
| -7 | 4 | 4 | 219.85  | 5.36  |
| -7 | 4 | 4 | 214.00  | 5.76  |
| -7 | 4 | 4 | 219.73  | 5.43  |
| -7 | 4 | 4 | 208.06  | 5.20  |
| -7 | 4 | 5 | 457.25  | 9.06  |
| -7 | 4 | 5 | 434.15  | 8.26  |
| -7 | 4 | 5 | 444.08  | 7.01  |
| -7 | 4 | 5 | 446.13  | 9.19  |
| -7 | 4 | 5 | 432.48  | 9.27  |
| -7 | 4 | 5 | 437.37  | 9.42  |
| -7 | 4 | 5 | 450.10  | 9.33  |
| -7 | 4 | 5 | 405.75  | 7.97  |
| -7 | 4 | 5 | 424.80  | 9.34  |
| -7 | 4 | 5 | 429.54  | 7.96  |
| -7 | 4 | 5 | 438.98  | 8.22  |
| -7 | 4 | 5 | 425.93  | 9.34  |
| -7 | 4 | 5 | 410.65  | 8.11  |

CIF 31

|    |   |   |        |       |
|----|---|---|--------|-------|
| -7 | 4 | 5 | 428.74 | 8.23  |
| -7 | 4 | 6 | 825.11 | 12.24 |
| -7 | 4 | 6 | 821.96 | 13.72 |
| -7 | 4 | 6 | 764.75 | 12.93 |
| -7 | 4 | 6 | 756.63 | 11.41 |
| -7 | 4 | 6 | 817.37 | 12.52 |
| -7 | 4 | 6 | 734.25 | 12.70 |
| -7 | 4 | 6 | 871.09 | 14.96 |
| -7 | 4 | 6 | 833.62 | 12.76 |
| -7 | 4 | 6 | 762.88 | 13.04 |
| -7 | 4 | 6 | 834.40 | 13.62 |
| -7 | 4 | 6 | 803.98 | 11.50 |
| -7 | 4 | 6 | 764.79 | 10.50 |
| -7 | 4 | 6 | 771.73 | 11.81 |
| -7 | 4 | 6 | 840.94 | 13.41 |
| -7 | 4 | 6 | 795.90 | 12.47 |
| -7 | 4 | 7 | 26.85  | 1.93  |
| -7 | 4 | 7 | 24.30  | 2.31  |
| -7 | 4 | 7 | 23.48  | 2.18  |
| -7 | 4 | 7 | 27.40  | 2.27  |
| -7 | 4 | 7 | 21.89  | 2.08  |
| -7 | 4 | 7 | 24.08  | 2.54  |
| -7 | 4 | 7 | 23.26  | 2.10  |
| -7 | 4 | 7 | 19.32  | 1.95  |
| -7 | 4 | 7 | 25.36  | 1.99  |
| -7 | 4 | 7 | 24.32  | 2.39  |
| -7 | 4 | 7 | 22.72  | 2.10  |
| -7 | 4 | 7 | 22.13  | 1.90  |
| -7 | 4 | 7 | 24.21  | 2.53  |
| -7 | 4 | 7 | 24.64  | 1.69  |
| -7 | 4 | 7 | 22.92  | 2.24  |
| -7 | 4 | 7 | 20.28  | 2.43  |
| -7 | 4 | 8 | 34.16  | 2.67  |
| -7 | 4 | 8 | 32.36  | 2.81  |
| -7 | 4 | 8 | 37.50  | 2.49  |
| -7 | 4 | 8 | 37.28  | 3.13  |
| -7 | 4 | 8 | 36.85  | 2.78  |
| -7 | 4 | 8 | 37.06  | 2.10  |
| -7 | 4 | 8 | 34.18  | 2.84  |
| -7 | 4 | 8 | 36.34  | 2.31  |
| -7 | 4 | 8 | 36.17  | 2.70  |

## CIF 31

|    |   |    |       |      |
|----|---|----|-------|------|
| -7 | 4 | 8  | 30.88 | 2.31 |
| -7 | 4 | 8  | 33.98 | 2.28 |
| -7 | 4 | 8  | 41.51 | 3.11 |
| -7 | 4 | 8  | 32.90 | 2.53 |
| -7 | 4 | 8  | 31.15 | 2.69 |
| -7 | 4 | 8  | 33.33 | 2.16 |
| -7 | 4 | 8  | 37.46 | 2.78 |
| -7 | 4 | 9  | 85.91 | 4.17 |
| -7 | 4 | 9  | 72.17 | 2.93 |
| -7 | 4 | 9  | 70.97 | 3.13 |
| -7 | 4 | 9  | 71.49 | 3.28 |
| -7 | 4 | 9  | 71.61 | 3.99 |
| -7 | 4 | 9  | 67.88 | 3.66 |
| -7 | 4 | 9  | 74.37 | 3.20 |
| -7 | 4 | 9  | 69.13 | 3.95 |
| -7 | 4 | 9  | 63.89 | 2.77 |
| -7 | 4 | 9  | 73.78 | 3.89 |
| -7 | 4 | 9  | 75.08 | 3.80 |
| -7 | 4 | 9  | 69.65 | 3.56 |
| -7 | 4 | 9  | 67.11 | 3.99 |
| -7 | 4 | 9  | 78.36 | 3.59 |
| -7 | 4 | 9  | 76.09 | 4.02 |
| -7 | 4 | 10 | 31.58 | 2.38 |
| -7 | 4 | 10 | 28.99 | 2.18 |
| -7 | 4 | 10 | 29.46 | 1.96 |
| -7 | 4 | 10 | 33.13 | 2.65 |
| -7 | 4 | 10 | 28.65 | 2.42 |
| -7 | 4 | 10 | 29.57 | 1.87 |
| -7 | 4 | 10 | 27.15 | 2.55 |
| -7 | 4 | 10 | 27.56 | 2.45 |
| -7 | 4 | 10 | 25.91 | 2.45 |
| -7 | 4 | 10 | 25.45 | 2.08 |
| -7 | 4 | 10 | 28.36 | 2.47 |
| -7 | 4 | 10 | 27.96 | 2.50 |
| -7 | 4 | 10 | 28.75 | 2.19 |
| -7 | 4 | 10 | 29.73 | 2.56 |
| -7 | 4 | 10 | 27.48 | 2.06 |
| -7 | 4 | 11 | 44.63 | 2.93 |
| -7 | 4 | 11 | 46.91 | 2.83 |
| -7 | 4 | 11 | 45.89 | 2.95 |
| -7 | 4 | 11 | 40.73 | 2.68 |

## CIF 31

|    |   |     |        |      |
|----|---|-----|--------|------|
| -7 | 4 | 11  | 43.01  | 2.85 |
| -7 | 4 | 11  | 44.78  | 2.46 |
| -7 | 4 | 11  | 42.87  | 2.79 |
| -7 | 4 | 11  | 45.84  | 3.02 |
| -7 | 4 | 11  | 50.69  | 2.70 |
| -7 | 4 | 11  | 47.16  | 2.61 |
| -7 | 4 | 11  | 44.51  | 2.72 |
| -7 | 4 | 11  | 44.76  | 2.93 |
| -7 | 4 | 12  | 216.11 | 5.50 |
| -7 | 4 | 12  | 215.00 | 5.78 |
| -7 | 4 | 12  | 210.51 | 4.94 |
| -7 | 4 | 12  | 223.93 | 5.77 |
| -7 | 4 | 12  | 209.17 | 5.67 |
| -7 | 4 | 12  | 202.87 | 4.94 |
| -7 | 4 | 12  | 198.37 | 5.29 |
| -7 | 4 | 13  | 90.64  | 3.23 |
| -7 | 4 | 13  | 77.16  | 2.52 |
| -7 | 4 | 13  | 84.47  | 2.59 |
| -7 | 4 | 13  | 93.22  | 3.13 |
| -7 | 4 | 13  | 94.82  | 3.11 |
| -7 | 4 | 13  | 74.05  | 2.65 |
| -7 | 4 | 13  | 89.08  | 3.13 |
| -7 | 4 | 14  | 79.06  | 2.36 |
| -7 | 4 | 14  | 79.49  | 2.34 |
| -7 | 5 | -10 | 67.88  | 2.21 |
| -7 | 5 | -10 | 59.57  | 1.70 |
| -7 | 5 | -9  | 54.48  | 2.48 |
| -7 | 5 | -9  | 58.12  | 2.44 |
| -7 | 5 | -9  | 59.37  | 3.26 |
| -7 | 5 | -9  | 54.88  | 3.23 |
| -7 | 5 | -9  | 55.42  | 2.07 |
| -7 | 5 | -8  | 3.65   | 1.15 |
| -7 | 5 | -8  | 3.07   | 0.98 |
| -7 | 5 | -8  | 3.19   | 1.04 |
| -7 | 5 | -8  | 3.08   | 2.52 |
| -7 | 5 | -8  | 4.38   | 1.11 |
| -7 | 5 | -7  | 2.55   | 1.10 |
| -7 | 5 | -7  | 2.67   | 1.54 |
| -7 | 5 | -7  | 1.59   | 1.06 |
| -7 | 5 | -7  | 1.50   | 0.97 |
| -7 | 5 | -7  | 1.74   | 1.08 |

## CIF 31

|    |   |    |        |       |
|----|---|----|--------|-------|
| -7 | 5 | -7 | 2.58   | 1.31  |
| -7 | 5 | -6 | 362.22 | 7.40  |
| -7 | 5 | -6 | 336.40 | 7.49  |
| -7 | 5 | -6 | 352.96 | 7.46  |
| -7 | 5 | -6 | 342.63 | 6.42  |
| -7 | 5 | -6 | 365.42 | 7.53  |
| -7 | 5 | -6 | 370.72 | 7.36  |
| -7 | 5 | -6 | 323.92 | 7.53  |
| -7 | 5 | -5 | 297.66 | 6.71  |
| -7 | 5 | -5 | 288.41 | 6.45  |
| -7 | 5 | -5 | 283.61 | 5.62  |
| -7 | 5 | -4 | 97.84  | 3.78  |
| -7 | 5 | -4 | 96.82  | 3.58  |
| -7 | 5 | -4 | 102.48 | 3.90  |
| -7 | 5 | -4 | 98.31  | 3.80  |
| -7 | 5 | -3 | 59.52  | 2.93  |
| -7 | 5 | -3 | 65.17  | 3.01  |
| -7 | 5 | -3 | 59.32  | 4.07  |
| -7 | 5 | -3 | 63.14  | 3.38  |
| -7 | 5 | -3 | 64.38  | 3.02  |
| -7 | 5 | -3 | 63.41  | 2.99  |
| -7 | 5 | -3 | 63.07  | 2.84  |
| -7 | 5 | -2 | 1.23   | 0.94  |
| -7 | 5 | -2 | 1.40   | 0.98  |
| -7 | 5 | -2 | 1.69   | 0.95  |
| -7 | 5 | -2 | 2.41   | 0.68  |
| -7 | 5 | -2 | 1.33   | 0.97  |
| -7 | 5 | -1 | 498.84 | 8.43  |
| -7 | 5 | -1 | 495.08 | 8.31  |
| -7 | 5 | -1 | 511.83 | 9.37  |
| -7 | 5 | -1 | 492.47 | 9.73  |
| -7 | 5 | -1 | 489.01 | 11.06 |
| -7 | 5 | -1 | 501.94 | 9.48  |
| -7 | 5 | -1 | 479.98 | 8.21  |
| -7 | 5 | -1 | 500.14 | 7.66  |
| -7 | 5 | -1 | 465.38 | 9.70  |
| -7 | 5 | -1 | 464.09 | 8.28  |
| -7 | 5 | -1 | 505.22 | 11.11 |
| -7 | 5 | 0  | 7.19   | 1.51  |
| -7 | 5 | 0  | 6.23   | 1.24  |
| -7 | 5 | 0  | 7.98   | 1.74  |

## CIF 31

|    |   |   |        |       |
|----|---|---|--------|-------|
| -7 | 5 | 0 | 6.61   | 1.71  |
| -7 | 5 | 0 | 7.62   | 1.74  |
| -7 | 5 | 0 | 5.34   | 1.55  |
| -7 | 5 | 0 | 7.17   | 0.99  |
| -7 | 5 | 0 | 6.20   | 1.33  |
| -7 | 5 | 0 | 7.70   | 1.07  |
| -7 | 5 | 0 | 7.88   | 1.52  |
| -7 | 5 | 0 | 5.57   | 1.21  |
| -7 | 5 | 0 | 8.09   | 1.18  |
| -7 | 5 | 0 | 6.81   | 1.14  |
| -7 | 5 | 0 | 6.85   | 1.24  |
| -7 | 5 | 1 | 501.34 | 9.51  |
| -7 | 5 | 1 | 509.73 | 9.82  |
| -7 | 5 | 1 | 514.05 | 7.89  |
| -7 | 5 | 1 | 502.96 | 10.53 |
| -7 | 5 | 1 | 462.11 | 10.13 |
| -7 | 5 | 1 | 513.58 | 10.32 |
| -7 | 5 | 1 | 456.29 | 10.18 |
| -7 | 5 | 1 | 535.54 | 9.81  |
| -7 | 5 | 1 | 492.44 | 7.90  |
| -7 | 5 | 1 | 554.74 | 9.13  |
| -7 | 5 | 1 | 506.32 | 10.06 |
| -7 | 5 | 1 | 507.47 | 9.40  |
| -7 | 5 | 1 | 501.49 | 11.25 |
| -7 | 5 | 1 | 487.99 | 7.67  |
| -7 | 5 | 1 | 468.20 | 7.48  |
| -7 | 5 | 2 | 744.43 | 12.63 |
| -7 | 5 | 2 | 703.10 | 12.44 |
| -7 | 5 | 2 | 647.28 | 9.40  |
| -7 | 5 | 2 | 732.91 | 13.02 |
| -7 | 5 | 2 | 695.50 | 12.47 |
| -7 | 5 | 2 | 726.21 | 10.89 |
| -7 | 5 | 2 | 745.82 | 12.06 |
| -7 | 5 | 2 | 700.24 | 9.70  |
| -7 | 5 | 2 | 731.98 | 12.12 |
| -7 | 5 | 2 | 750.77 | 12.45 |
| -7 | 5 | 2 | 695.67 | 12.21 |
| -7 | 5 | 2 | 697.33 | 10.84 |
| -7 | 5 | 3 | 473.55 | 11.03 |
| -7 | 5 | 3 | 474.69 | 9.65  |
| -7 | 5 | 3 | 457.37 | 9.55  |

CIF 31

|    |   |   |         |       |
|----|---|---|---------|-------|
| -7 | 5 | 3 | 460.52  | 10.18 |
| -7 | 5 | 3 | 481.66  | 9.78  |
| -7 | 5 | 3 | 512.80  | 9.12  |
| -7 | 5 | 3 | 479.09  | 9.82  |
| -7 | 5 | 3 | 499.69  | 9.93  |
| -7 | 5 | 3 | 497.29  | 10.54 |
| -7 | 5 | 3 | 542.93  | 9.13  |
| -7 | 5 | 3 | 502.47  | 9.45  |
| -7 | 5 | 3 | 516.23  | 7.94  |
| -7 | 5 | 3 | 489.28  | 10.08 |
| -7 | 5 | 4 | 108.07  | 3.39  |
| -7 | 5 | 4 | 108.40  | 4.87  |
| -7 | 5 | 4 | 113.17  | 4.42  |
| -7 | 5 | 4 | 112.33  | 3.74  |
| -7 | 5 | 4 | 103.04  | 4.54  |
| -7 | 5 | 4 | 118.61  | 5.34  |
| -7 | 5 | 4 | 109.07  | 4.28  |
| -7 | 5 | 4 | 114.61  | 3.79  |
| -7 | 5 | 4 | 114.71  | 4.71  |
| -7 | 5 | 4 | 114.56  | 4.66  |
| -7 | 5 | 4 | 119.68  | 4.92  |
| -7 | 5 | 5 | 861.98  | 13.38 |
| -7 | 5 | 5 | 818.51  | 12.25 |
| -7 | 5 | 5 | 843.46  | 14.22 |
| -7 | 5 | 5 | 853.64  | 12.53 |
| -7 | 5 | 5 | 821.75  | 13.97 |
| -7 | 5 | 5 | 769.02  | 13.68 |
| -7 | 5 | 5 | 842.88  | 14.00 |
| -7 | 5 | 5 | 792.49  | 11.23 |
| -7 | 5 | 5 | 838.76  | 12.23 |
| -7 | 5 | 5 | 817.74  | 14.14 |
| -7 | 5 | 5 | 876.11  | 13.92 |
| -7 | 5 | 6 | 1692.56 | 21.30 |
| -7 | 5 | 6 | 1773.07 | 21.24 |
| -7 | 5 | 6 | 1588.44 | 21.69 |
| -7 | 5 | 6 | 1860.12 | 23.50 |
| -7 | 5 | 6 | 1822.33 | 22.58 |
| -7 | 5 | 6 | 1779.22 | 22.82 |
| -7 | 5 | 6 | 1832.03 | 20.04 |
| -7 | 5 | 6 | 1736.97 | 23.09 |
| -7 | 5 | 6 | 1920.37 | 23.42 |



## CIF 31

|    |   |   |         |       |
|----|---|---|---------|-------|
| -7 | 5 | 6 | 1790.64 | 24.27 |
| -7 | 5 | 6 | 1747.42 | 22.73 |
| -7 | 5 | 7 | 674.11  | 12.20 |
| -7 | 5 | 7 | 627.80  | 11.33 |
| -7 | 5 | 7 | 671.96  | 11.85 |
| -7 | 5 | 7 | 719.59  | 11.87 |
| -7 | 5 | 7 | 701.52  | 12.91 |
| -7 | 5 | 7 | 658.07  | 10.75 |
| -7 | 5 | 7 | 719.31  | 10.60 |
| -7 | 5 | 7 | 767.10  | 14.06 |
| -7 | 5 | 7 | 704.85  | 12.50 |
| -7 | 5 | 7 | 695.29  | 12.83 |
| -7 | 5 | 7 | 709.59  | 12.01 |
| -7 | 5 | 7 | 754.99  | 12.98 |
| -7 | 5 | 7 | 756.94  | 11.87 |
| -7 | 5 | 7 | 654.50  | 12.91 |
| -7 | 5 | 8 | 130.97  | 5.21  |
| -7 | 5 | 8 | 116.56  | 5.40  |
| -7 | 5 | 8 | 114.42  | 5.10  |
| -7 | 5 | 8 | 133.03  | 4.91  |
| -7 | 5 | 8 | 117.26  | 3.90  |
| -7 | 5 | 8 | 117.63  | 4.31  |
| -7 | 5 | 8 | 113.40  | 4.47  |
| -7 | 5 | 8 | 122.46  | 4.31  |
| -7 | 5 | 8 | 125.21  | 5.25  |
| -7 | 5 | 8 | 116.09  | 4.88  |
| -7 | 5 | 8 | 115.11  | 4.64  |
| -7 | 5 | 8 | 119.21  | 4.69  |
| -7 | 5 | 8 | 119.30  | 4.70  |
| -7 | 5 | 9 | 29.88   | 2.67  |
| -7 | 5 | 9 | 28.72   | 2.61  |
| -7 | 5 | 9 | 22.68   | 2.45  |
| -7 | 5 | 9 | 26.07   | 2.40  |
| -7 | 5 | 9 | 28.74   | 2.17  |
| -7 | 5 | 9 | 22.73   | 2.48  |
| -7 | 5 | 9 | 29.17   | 2.72  |
| -7 | 5 | 9 | 26.03   | 2.34  |
| -7 | 5 | 9 | 28.37   | 2.36  |
| -7 | 5 | 9 | 29.86   | 2.32  |
| -7 | 5 | 9 | 29.26   | 1.98  |
| -7 | 5 | 9 | 25.72   | 2.31  |

## CIF 31

|    |   |     |        |      |
|----|---|-----|--------|------|
| -7 | 5 | 9   | 30.73  | 2.32 |
| -7 | 5 | 10  | 244.52 | 6.73 |
| -7 | 5 | 10  | 265.29 | 7.17 |
| -7 | 5 | 10  | 262.26 | 6.74 |
| -7 | 5 | 10  | 258.05 | 6.36 |
| -7 | 5 | 10  | 255.69 | 6.15 |
| -7 | 5 | 10  | 244.80 | 6.89 |
| -7 | 5 | 10  | 257.29 | 6.79 |
| -7 | 5 | 10  | 235.12 | 6.85 |
| -7 | 5 | 10  | 244.54 | 5.59 |
| -7 | 5 | 10  | 220.10 | 6.02 |
| -7 | 5 | 10  | 258.61 | 7.18 |
| -7 | 5 | 10  | 222.46 | 6.60 |
| -7 | 5 | 11  | 117.45 | 4.38 |
| -7 | 5 | 11  | 129.21 | 4.52 |
| -7 | 5 | 11  | 128.34 | 4.45 |
| -7 | 5 | 11  | 125.14 | 4.50 |
| -7 | 5 | 11  | 125.04 | 3.89 |
| -7 | 5 | 11  | 124.77 | 4.34 |
| -7 | 5 | 11  | 115.15 | 4.38 |
| -7 | 5 | 11  | 116.25 | 4.33 |
| -7 | 5 | 11  | 125.25 | 4.12 |
| -7 | 5 | 12  | 351.27 | 6.41 |
| -7 | 5 | 12  | 370.53 | 7.06 |
| -7 | 5 | 12  | 366.73 | 7.34 |
| -7 | 5 | 12  | 366.86 | 6.71 |
| -7 | 5 | 13  | 8.55   | 1.03 |
| -7 | 5 | 13  | 8.94   | 1.03 |
| -7 | 5 | 13  | 7.18   | 0.91 |
| -7 | 5 | 13  | 8.78   | 1.05 |
| -7 | 6 | -10 | 68.90  | 2.46 |
| -7 | 6 | -10 | 76.71  | 2.33 |
| -7 | 6 | -9  | 0.80   | 2.59 |
| -7 | 6 | -9  | 1.85   | 1.73 |
| -7 | 6 | -9  | 0.35   | 0.82 |
| -7 | 6 | -9  | 0.02   | 2.51 |
| -7 | 6 | -8  | 27.65  | 1.94 |
| -7 | 6 | -8  | 26.21  | 1.88 |
| -7 | 6 | -8  | 25.80  | 1.88 |
| -7 | 6 | -8  | 25.62  | 1.88 |
| -7 | 6 | -8  | 25.10  | 2.05 |

## CIF 31

|    |   |    |         |       |
|----|---|----|---------|-------|
| -7 | 6 | -7 | 168.35  | 4.71  |
| -7 | 6 | -7 | 175.35  | 4.88  |
| -7 | 6 | -7 | 171.69  | 4.99  |
| -7 | 6 | -7 | 172.03  | 4.80  |
| -7 | 6 | -7 | 172.51  | 4.23  |
| -7 | 6 | -6 | 156.15  | 4.70  |
| -7 | 6 | -6 | 156.65  | 4.85  |
| -7 | 6 | -6 | 148.94  | 4.57  |
| -7 | 6 | -6 | 151.51  | 4.04  |
| -7 | 6 | -6 | 146.95  | 4.51  |
| -7 | 6 | -5 | 101.05  | 3.75  |
| -7 | 6 | -5 | 98.17   | 3.72  |
| -7 | 6 | -5 | 103.63  | 3.94  |
| -7 | 6 | -5 | 97.68   | 3.18  |
| -7 | 6 | -4 | 131.12  | 6.04  |
| -7 | 6 | -4 | 139.11  | 4.32  |
| -7 | 6 | -4 | 143.68  | 4.60  |
| -7 | 6 | -4 | 139.14  | 4.38  |
| -7 | 6 | -3 | 1008.29 | 13.52 |
| -7 | 6 | -3 | 954.88  | 12.60 |
| -7 | 6 | -3 | 902.34  | 16.11 |
| -7 | 6 | -3 | 935.19  | 17.05 |
| -7 | 6 | -3 | 1047.21 | 14.09 |
| -7 | 6 | -3 | 1019.81 | 13.49 |
| -7 | 6 | -3 | 1098.36 | 14.01 |
| -7 | 6 | -2 | 52.93   | 3.64  |
| -7 | 6 | -2 | 43.92   | 2.38  |
| -7 | 6 | -2 | 53.51   | 2.40  |
| -7 | 6 | -2 | 46.51   | 2.43  |
| -7 | 6 | -2 | 53.24   | 3.72  |
| -7 | 6 | -2 | 44.13   | 2.48  |
| -7 | 6 | -1 | 796.10  | 12.31 |
| -7 | 6 | -1 | 777.68  | 14.61 |
| -7 | 6 | -1 | 800.46  | 13.07 |
| -7 | 6 | -1 | 723.53  | 10.59 |
| -7 | 6 | -1 | 753.27  | 14.62 |
| -7 | 6 | -1 | 751.39  | 12.56 |
| -7 | 6 | -1 | 769.96  | 11.14 |
| -7 | 6 | -1 | 798.25  | 10.98 |
| -7 | 6 | -1 | 820.85  | 11.16 |
| -7 | 6 | -1 | 732.78  | 13.65 |

## CIF 31

|    |   |   |        |      |
|----|---|---|--------|------|
| -7 | 6 | 0 | 137.21 | 5.09 |
| -7 | 6 | 0 | 137.92 | 4.77 |
| -7 | 6 | 0 | 149.98 | 4.13 |
| -7 | 6 | 0 | 141.85 | 4.68 |
| -7 | 6 | 0 | 145.57 | 5.15 |
| -7 | 6 | 0 | 138.95 | 4.65 |
| -7 | 6 | 0 | 138.15 | 5.89 |
| -7 | 6 | 0 | 134.06 | 3.93 |
| -7 | 6 | 0 | 126.84 | 5.36 |
| -7 | 6 | 0 | 145.29 | 3.94 |
| -7 | 6 | 0 | 143.75 | 4.00 |
| -7 | 6 | 0 | 136.00 | 5.57 |
| -7 | 6 | 0 | 143.82 | 5.53 |
| -7 | 6 | 1 | 222.35 | 7.49 |
| -7 | 6 | 1 | 222.25 | 5.06 |
| -7 | 6 | 1 | 225.86 | 6.15 |
| -7 | 6 | 1 | 239.39 | 7.17 |
| -7 | 6 | 1 | 232.10 | 6.38 |
| -7 | 6 | 1 | 229.49 | 6.99 |
| -7 | 6 | 1 | 228.79 | 4.87 |
| -7 | 6 | 1 | 220.22 | 6.08 |
| -7 | 6 | 1 | 230.32 | 6.67 |
| -7 | 6 | 1 | 221.52 | 6.48 |
| -7 | 6 | 1 | 212.90 | 4.80 |
| -7 | 6 | 1 | 223.25 | 6.94 |
| -7 | 6 | 1 | 232.85 | 5.29 |
| -7 | 6 | 1 | 233.87 | 6.78 |
| -7 | 6 | 2 | 26.35  | 2.32 |
| -7 | 6 | 2 | 21.87  | 2.24 |
| -7 | 6 | 2 | 24.52  | 2.26 |
| -7 | 6 | 2 | 25.00  | 2.49 |
| -7 | 6 | 2 | 25.14  | 2.28 |
| -7 | 6 | 2 | 26.74  | 2.53 |
| -7 | 6 | 2 | 19.97  | 2.63 |
| -7 | 6 | 2 | 24.83  | 2.42 |
| -7 | 6 | 2 | 23.09  | 2.32 |
| -7 | 6 | 2 | 25.83  | 1.78 |
| -7 | 6 | 2 | 23.38  | 2.38 |
| -7 | 6 | 2 | 25.41  | 1.76 |
| -7 | 6 | 2 | 27.05  | 2.14 |
| -7 | 6 | 3 | 29.87  | 2.53 |

## CIF 31

|    |   |   |        |       |
|----|---|---|--------|-------|
| -7 | 6 | 3 | 30.24  | 2.63  |
| -7 | 6 | 3 | 27.59  | 2.45  |
| -7 | 6 | 3 | 26.31  | 2.69  |
| -7 | 6 | 3 | 30.41  | 2.65  |
| -7 | 6 | 3 | 23.90  | 2.73  |
| -7 | 6 | 3 | 38.77  | 2.91  |
| -7 | 6 | 3 | 26.71  | 2.28  |
| -7 | 6 | 3 | 32.28  | 2.00  |
| -7 | 6 | 3 | 30.07  | 2.17  |
| -7 | 6 | 3 | 32.65  | 2.45  |
| -7 | 6 | 3 | 30.47  | 2.76  |
| -7 | 6 | 3 | 29.71  | 2.58  |
| -7 | 6 | 4 | 142.21 | 5.35  |
| -7 | 6 | 4 | 135.43 | 5.00  |
| -7 | 6 | 4 | 139.69 | 5.91  |
| -7 | 6 | 4 | 136.36 | 4.51  |
| -7 | 6 | 4 | 153.23 | 5.89  |
| -7 | 6 | 4 | 139.57 | 4.74  |
| -7 | 6 | 4 | 135.46 | 4.09  |
| -7 | 6 | 4 | 143.91 | 5.28  |
| -7 | 6 | 4 | 128.96 | 5.28  |
| -7 | 6 | 4 | 131.91 | 5.32  |
| -7 | 6 | 4 | 142.12 | 5.29  |
| -7 | 6 | 4 | 125.01 | 4.76  |
| -7 | 6 | 5 | 676.15 | 12.50 |
| -7 | 6 | 5 | 662.60 | 12.67 |
| -7 | 6 | 5 | 657.57 | 12.57 |
| -7 | 6 | 5 | 672.43 | 10.77 |
| -7 | 6 | 5 | 721.46 | 11.32 |
| -7 | 6 | 5 | 681.80 | 12.55 |
| -7 | 6 | 5 | 672.98 | 10.45 |
| -7 | 6 | 5 | 651.65 | 10.69 |
| -7 | 6 | 5 | 700.53 | 11.89 |
| -7 | 6 | 5 | 696.20 | 12.40 |
| -7 | 6 | 6 | 29.62  | 2.03  |
| -7 | 6 | 6 | 25.34  | 2.56  |
| -7 | 6 | 6 | 23.52  | 2.09  |
| -7 | 6 | 6 | 21.65  | 2.38  |
| -7 | 6 | 6 | 22.38  | 2.57  |
| -7 | 6 | 6 | 25.40  | 2.09  |
| -7 | 6 | 6 | 21.58  | 2.47  |

## CIF 31

|    |   |   |        |      |
|----|---|---|--------|------|
| -7 | 6 | 6 | 24.74  | 2.41 |
| -7 | 6 | 6 | 21.57  | 2.26 |
| -7 | 6 | 6 | 25.12  | 2.06 |
| -7 | 6 | 6 | 22.69  | 2.00 |
| -7 | 6 | 6 | 25.46  | 2.57 |
| -7 | 6 | 6 | 21.84  | 2.60 |
| -7 | 6 | 7 | 52.94  | 2.70 |
| -7 | 6 | 7 | 49.63  | 3.47 |
| -7 | 6 | 7 | 49.31  | 3.25 |
| -7 | 6 | 7 | 51.69  | 2.81 |
| -7 | 6 | 7 | 61.13  | 3.68 |
| -7 | 6 | 7 | 38.70  | 2.58 |
| -7 | 6 | 7 | 47.82  | 3.15 |
| -7 | 6 | 7 | 45.01  | 3.26 |
| -7 | 6 | 7 | 46.61  | 2.77 |
| -7 | 6 | 7 | 49.51  | 2.98 |
| -7 | 6 | 7 | 49.79  | 3.26 |
| -7 | 6 | 7 | 46.39  | 2.85 |
| -7 | 6 | 7 | 53.58  | 3.72 |
| -7 | 6 | 8 | 66.92  | 3.47 |
| -7 | 6 | 8 | 76.18  | 3.23 |
| -7 | 6 | 8 | 78.45  | 4.15 |
| -7 | 6 | 8 | 76.83  | 3.96 |
| -7 | 6 | 8 | 74.24  | 3.87 |
| -7 | 6 | 8 | 78.54  | 3.84 |
| -7 | 6 | 8 | 74.32  | 3.62 |
| -7 | 6 | 8 | 80.55  | 4.23 |
| -7 | 6 | 8 | 73.00  | 3.52 |
| -7 | 6 | 8 | 78.95  | 4.31 |
| -7 | 6 | 8 | 73.26  | 3.62 |
| -7 | 6 | 8 | 79.82  | 3.43 |
| -7 | 6 | 9 | 319.95 | 8.26 |
| -7 | 6 | 9 | 348.13 | 7.63 |
| -7 | 6 | 9 | 338.69 | 6.87 |
| -7 | 6 | 9 | 330.13 | 7.69 |
| -7 | 6 | 9 | 277.86 | 7.88 |
| -7 | 6 | 9 | 324.79 | 8.10 |
| -7 | 6 | 9 | 341.91 | 7.15 |
| -7 | 6 | 9 | 301.28 | 7.62 |
| -7 | 6 | 9 | 321.73 | 6.95 |
| -7 | 6 | 9 | 340.96 | 7.76 |

## CIF 31

|    |   |     |        |      |
|----|---|-----|--------|------|
| -7 | 6 | 9   | 292.84 | 7.15 |
| -7 | 6 | 9   | 326.74 | 8.32 |
| -7 | 6 | 10  | 9.95   | 1.69 |
| -7 | 6 | 10  | 13.53  | 1.74 |
| -7 | 6 | 10  | 12.33  | 1.31 |
| -7 | 6 | 10  | 13.54  | 1.82 |
| -7 | 6 | 10  | 16.32  | 1.68 |
| -7 | 6 | 10  | 11.93  | 1.86 |
| -7 | 6 | 10  | 13.46  | 1.72 |
| -7 | 6 | 10  | 13.62  | 1.64 |
| -7 | 6 | 10  | 15.06  | 1.70 |
| -7 | 6 | 10  | 14.30  | 1.51 |
| -7 | 6 | 10  | 14.00  | 1.79 |
| -7 | 6 | 11  | 248.54 | 6.00 |
| -7 | 6 | 11  | 241.01 | 5.61 |
| -7 | 6 | 11  | 248.81 | 5.81 |
| -7 | 6 | 11  | 238.27 | 5.17 |
| -7 | 6 | 11  | 232.67 | 5.68 |
| -7 | 6 | 11  | 231.24 | 5.82 |
| -7 | 6 | 11  | 236.96 | 5.99 |
| -7 | 6 | 12  | 43.24  | 2.02 |
| -7 | 6 | 12  | 41.54  | 2.08 |
| -7 | 6 | 12  | 43.92  | 2.14 |
| -7 | 6 | 12  | 36.76  | 1.77 |
| -7 | 7 | -10 | 32.62  | 1.18 |
| -7 | 7 | -10 | 37.13  | 2.32 |
| -7 | 7 | -9  | 89.25  | 2.84 |
| -7 | 7 | -9  | 90.66  | 2.99 |
| -7 | 7 | -9  | 80.16  | 3.74 |
| -7 | 7 | -9  | 84.61  | 3.28 |
| -7 | 7 | -9  | 86.71  | 4.31 |
| -7 | 7 | -8  | 3.65   | 1.45 |
| -7 | 7 | -8  | 3.45   | 2.03 |
| -7 | 7 | -8  | 2.81   | 1.02 |
| -7 | 7 | -8  | 3.51   | 0.80 |
| -7 | 7 | -8  | 3.31   | 1.43 |
| -7 | 7 | -7  | 69.78  | 2.81 |
| -7 | 7 | -7  | 72.47  | 2.66 |
| -7 | 7 | -7  | 73.81  | 3.15 |
| -7 | 7 | -7  | 72.54  | 3.15 |
| -7 | 7 | -7  | 70.74  | 3.08 |

## CIF 31

|    |   |    |        |       |
|----|---|----|--------|-------|
| -7 | 7 | -6 | 234.67 | 5.76  |
| -7 | 7 | -6 | 228.63 | 4.97  |
| -7 | 7 | -6 | 236.93 | 5.83  |
| -7 | 7 | -6 | 219.31 | 5.30  |
| -7 | 7 | -5 | 765.94 | 11.13 |
| -7 | 7 | -5 | 752.28 | 10.40 |
| -7 | 7 | -5 | 772.79 | 11.92 |
| -7 | 7 | -5 | 809.72 | 11.99 |
| -7 | 7 | -5 | 733.37 | 14.72 |
| -7 | 7 | -5 | 822.08 | 11.90 |
| -7 | 7 | -4 | 10.71  | 1.95  |
| -7 | 7 | -4 | 7.37   | 1.22  |
| -7 | 7 | -4 | 8.02   | 1.42  |
| -7 | 7 | -4 | 7.85   | 1.34  |
| -7 | 7 | -4 | 7.27   | 1.41  |
| -7 | 7 | -4 | 9.41   | 1.20  |
| -7 | 7 | -4 | 10.97  | 2.23  |
| -7 | 7 | -3 | 1.31   | 0.78  |
| -7 | 7 | -3 | 0.56   | 1.43  |
| -7 | 7 | -3 | -0.14  | 1.45  |
| -7 | 7 | -3 | 1.24   | 0.88  |
| -7 | 7 | -2 | 87.55  | 3.77  |
| -7 | 7 | -2 | 88.70  | 3.16  |
| -7 | 7 | -2 | 84.49  | 4.82  |
| -7 | 7 | -2 | 91.38  | 3.31  |
| -7 | 7 | -2 | 80.33  | 4.25  |
| -7 | 7 | -2 | 84.89  | 4.73  |
| -7 | 7 | -2 | 87.59  | 3.16  |
| -7 | 7 | -2 | 90.70  | 4.81  |
| -7 | 7 | -1 | 126.24 | 4.70  |
| -7 | 7 | -1 | 124.21 | 4.80  |
| -7 | 7 | -1 | 112.39 | 5.39  |
| -7 | 7 | -1 | 133.85 | 4.01  |
| -7 | 7 | -1 | 118.55 | 5.07  |
| -7 | 7 | -1 | 111.94 | 5.51  |
| -7 | 7 | -1 | 136.82 | 3.82  |
| -7 | 7 | -1 | 126.23 | 3.61  |
| -7 | 7 | 0  | 109.07 | 4.96  |
| -7 | 7 | 0  | 100.18 | 4.85  |
| -7 | 7 | 0  | 105.17 | 3.28  |
| -7 | 7 | 0  | 111.11 | 4.71  |



## CIF 31

|    |   |   |         |       |
|----|---|---|---------|-------|
| -7 | 7 | 0 | 108.10  | 4.22  |
| -7 | 7 | 0 | 100.00  | 5.22  |
| -7 | 7 | 0 | 112.34  | 5.14  |
| -7 | 7 | 0 | 112.13  | 4.60  |
| -7 | 7 | 0 | 109.71  | 5.11  |
| -7 | 7 | 0 | 108.65  | 3.79  |
| -7 | 7 | 0 | 108.52  | 4.05  |
| -7 | 7 | 0 | 114.15  | 3.71  |
| -7 | 7 | 0 | 110.07  | 4.48  |
| -7 | 7 | 1 | 1868.64 | 22.25 |
| -7 | 7 | 1 | 1808.59 | 19.55 |
| -7 | 7 | 1 | 1790.39 | 23.37 |
| -7 | 7 | 1 | 1852.60 | 24.59 |
| -7 | 7 | 1 | 1793.78 | 23.24 |
| -7 | 7 | 1 | 1775.22 | 22.54 |
| -7 | 7 | 1 | 1944.44 | 21.26 |
| -7 | 7 | 1 | 1835.86 | 23.62 |
| -7 | 7 | 1 | 1908.35 | 20.63 |
| -7 | 7 | 1 | 1774.30 | 24.04 |
| -7 | 7 | 1 | 1696.94 | 24.01 |
| -7 | 7 | 1 | 1860.25 | 22.29 |
| -7 | 7 | 2 | 1787.99 | 23.36 |
| -7 | 7 | 2 | 1871.90 | 20.83 |
| -7 | 7 | 2 | 1652.21 | 22.16 |
| -7 | 7 | 2 | 1799.31 | 21.52 |
| -7 | 7 | 2 | 1774.20 | 25.18 |
| -7 | 7 | 2 | 1797.03 | 21.46 |
| -7 | 7 | 2 | 1674.94 | 23.53 |
| -7 | 7 | 2 | 1785.39 | 23.17 |
| -7 | 7 | 2 | 1732.49 | 23.95 |
| -7 | 7 | 2 | 1875.01 | 20.45 |
| -7 | 7 | 2 | 1762.97 | 23.27 |
| -7 | 7 | 2 | 1848.27 | 22.49 |
| -7 | 7 | 2 | 1770.67 | 23.51 |
| -7 | 7 | 2 | 1817.07 | 23.86 |
| -7 | 7 | 3 | 1481.96 | 17.93 |
| -7 | 7 | 3 | 1505.95 | 21.69 |
| -7 | 7 | 3 | 1555.41 | 21.61 |
| -7 | 7 | 3 | 1504.33 | 18.54 |
| -7 | 7 | 3 | 1454.03 | 22.49 |
| -7 | 7 | 3 | 1561.68 | 21.26 |

## CIF 31

|    |   |   |         |       |
|----|---|---|---------|-------|
| -7 | 7 | 3 | 1441.67 | 20.52 |
| -7 | 7 | 3 | 1494.58 | 18.44 |
| -7 | 7 | 3 | 1570.92 | 20.60 |
| -7 | 7 | 3 | 1573.50 | 20.91 |
| -7 | 7 | 3 | 1492.33 | 18.73 |
| -7 | 7 | 3 | 1589.91 | 21.51 |
| -7 | 7 | 3 | 1453.82 | 19.92 |
| -7 | 7 | 3 | 1605.32 | 19.96 |
| -7 | 7 | 4 | 1477.37 | 21.33 |
| -7 | 7 | 4 | 1550.50 | 20.27 |
| -7 | 7 | 4 | 1578.04 | 22.25 |
| -7 | 7 | 4 | 1593.10 | 19.47 |
| -7 | 7 | 4 | 1397.04 | 20.59 |
| -7 | 7 | 4 | 1583.68 | 18.85 |
| -7 | 7 | 4 | 1624.53 | 19.30 |
| -7 | 7 | 4 | 1410.43 | 19.85 |
| -7 | 7 | 4 | 1334.30 | 20.35 |
| -7 | 7 | 4 | 1601.70 | 21.69 |
| -7 | 7 | 4 | 1593.91 | 20.94 |
| -7 | 7 | 4 | 1474.41 | 22.36 |
| -7 | 7 | 5 | 1209.12 | 17.19 |
| -7 | 7 | 5 | 1260.53 | 18.83 |
| -7 | 7 | 5 | 1313.50 | 18.50 |
| -7 | 7 | 5 | 1295.42 | 19.04 |
| -7 | 7 | 5 | 1263.29 | 16.31 |
| -7 | 7 | 5 | 1105.61 | 17.47 |
| -7 | 7 | 5 | 1276.32 | 18.93 |
| -7 | 7 | 5 | 1245.97 | 16.60 |
| -7 | 7 | 5 | 1185.67 | 19.33 |
| -7 | 7 | 5 | 1335.39 | 18.95 |
| -7 | 7 | 6 | 3.75    | 1.33  |
| -7 | 7 | 6 | 3.35    | 1.50  |
| -7 | 7 | 6 | 3.19    | 1.56  |
| -7 | 7 | 6 | 4.98    | 1.55  |
| -7 | 7 | 6 | 4.76    | 1.10  |
| -7 | 7 | 6 | 4.62    | 1.64  |
| -7 | 7 | 6 | 3.13    | 1.54  |
| -7 | 7 | 6 | 4.28    | 1.09  |
| -7 | 7 | 6 | 4.03    | 1.41  |
| -7 | 7 | 6 | 4.51    | 1.18  |
| -7 | 7 | 6 | 3.76    | 1.57  |

## CIF 31

|    |   |    |        |      |
|----|---|----|--------|------|
| -7 | 7 | 7  | 417.48 | 9.09 |
| -7 | 7 | 7  | 398.16 | 8.17 |
| -7 | 7 | 7  | 413.70 | 7.96 |
| -7 | 7 | 7  | 416.48 | 9.40 |
| -7 | 7 | 7  | 413.49 | 8.03 |
| -7 | 7 | 7  | 408.63 | 8.36 |
| -7 | 7 | 7  | 388.90 | 9.77 |
| -7 | 7 | 7  | 425.03 | 9.55 |
| -7 | 7 | 7  | 404.65 | 8.03 |
| -7 | 7 | 7  | 416.45 | 9.81 |
| -7 | 7 | 7  | 377.28 | 8.97 |
| -7 | 7 | 7  | 370.39 | 9.50 |
| -7 | 7 | 7  | 403.00 | 9.59 |
| -7 | 7 | 8  | 29.21  | 2.48 |
| -7 | 7 | 8  | 27.66  | 2.13 |
| -7 | 7 | 8  | 27.61  | 2.10 |
| -7 | 7 | 8  | 24.74  | 2.17 |
| -7 | 7 | 8  | 28.34  | 2.39 |
| -7 | 7 | 8  | 26.73  | 2.43 |
| -7 | 7 | 8  | 25.18  | 1.89 |
| -7 | 7 | 8  | 29.25  | 2.76 |
| -7 | 7 | 8  | 27.23  | 2.58 |
| -7 | 7 | 8  | 27.20  | 2.18 |
| -7 | 7 | 8  | 29.70  | 2.70 |
| -7 | 7 | 8  | 27.05  | 1.98 |
| -7 | 7 | 9  | 1.50   | 0.87 |
| -7 | 7 | 9  | 3.28   | 1.14 |
| -7 | 7 | 9  | 1.79   | 0.71 |
| -7 | 7 | 9  | 1.48   | 1.22 |
| -7 | 7 | 9  | 2.15   | 1.24 |
| -7 | 7 | 9  | 2.16   | 1.21 |
| -7 | 7 | 9  | 2.51   | 1.02 |
| -7 | 7 | 9  | 1.67   | 1.02 |
| -7 | 7 | 9  | 1.95   | 1.16 |
| -7 | 7 | 9  | 1.32   | 0.96 |
| -7 | 7 | 10 | 317.50 | 7.31 |
| -7 | 7 | 10 | 326.36 | 6.33 |
| -7 | 7 | 10 | 316.32 | 6.58 |
| -7 | 7 | 10 | 313.12 | 7.17 |
| -7 | 7 | 10 | 339.44 | 7.18 |
| -7 | 7 | 10 | 298.33 | 6.42 |

## CIF 31

|    |   |     |        |      |
|----|---|-----|--------|------|
| -7 | 7 | 11  | 3.37   | 0.95 |
| -7 | 7 | 11  | 3.20   | 0.79 |
| -7 | 7 | 11  | 3.36   | 1.02 |
| -7 | 7 | 11  | 3.36   | 0.87 |
| -7 | 7 | 11  | 2.90   | 0.94 |
| -7 | 7 | 11  | 2.67   | 0.83 |
| -7 | 7 | 11  | 3.54   | 0.86 |
| -7 | 7 | 12  | 4.62   | 0.68 |
| -7 | 7 | 12  | 5.35   | 0.73 |
| -7 | 8 | -10 | 1.10   | 1.70 |
| -7 | 8 | -9  | 58.51  | 3.10 |
| -7 | 8 | -8  | 1.03   | 3.12 |
| -7 | 8 | -8  | 0.57   | 0.60 |
| -7 | 8 | -7  | 25.29  | 2.19 |
| -7 | 8 | -7  | 24.98  | 1.54 |
| -7 | 8 | -7  | 25.68  | 2.50 |
| -7 | 8 | -7  | 25.72  | 1.73 |
| -7 | 8 | -6  | 347.94 | 6.18 |
| -7 | 8 | -6  | 347.55 | 6.70 |
| -7 | 8 | -6  | 351.22 | 9.23 |
| -7 | 8 | -6  | 340.20 | 6.03 |
| -7 | 8 | -6  | 359.38 | 7.18 |
| -7 | 8 | -5  | 196.10 | 4.44 |
| -7 | 8 | -5  | 211.72 | 5.53 |
| -7 | 8 | -5  | 208.20 | 5.05 |
| -7 | 8 | -5  | 183.00 | 6.09 |
| -7 | 8 | -5  | 200.84 | 7.27 |
| -7 | 8 | -5  | 195.64 | 5.08 |
| -7 | 8 | -4  | 143.84 | 6.31 |
| -7 | 8 | -4  | 158.93 | 4.63 |
| -7 | 8 | -4  | 149.04 | 4.19 |
| -7 | 8 | -4  | 133.01 | 5.61 |
| -7 | 8 | -4  | 150.47 | 4.59 |
| -7 | 8 | -4  | 135.80 | 5.87 |
| -7 | 8 | -3  | 43.18  | 3.48 |
| -7 | 8 | -3  | 41.27  | 2.91 |
| -7 | 8 | -3  | 42.18  | 2.38 |
| -7 | 8 | -3  | 43.29  | 2.49 |
| -7 | 8 | -3  | 41.12  | 3.40 |
| -7 | 8 | -3  | 42.96  | 2.22 |
| -7 | 8 | -2  | 29.31  | 2.01 |

## CIF 31

|    |   |    |        |       |
|----|---|----|--------|-------|
| -7 | 8 | -2 | 22.94  | 2.78  |
| -7 | 8 | -2 | 24.31  | 2.47  |
| -7 | 8 | -2 | 22.47  | 2.76  |
| -7 | 8 | -2 | 22.88  | 2.71  |
| -7 | 8 | -2 | 26.70  | 1.92  |
| -7 | 8 | -1 | 22.94  | 2.58  |
| -7 | 8 | -1 | 21.35  | 2.82  |
| -7 | 8 | -1 | 31.85  | 1.94  |
| -7 | 8 | -1 | 23.44  | 2.42  |
| -7 | 8 | -1 | 24.50  | 2.30  |
| -7 | 8 | -1 | 23.93  | 2.28  |
| -7 | 8 | -1 | 23.75  | 2.72  |
| -7 | 8 | -1 | 28.24  | 2.02  |
| -7 | 8 | -1 | 23.31  | 2.13  |
| -7 | 8 | 0  | 40.32  | 2.80  |
| -7 | 8 | 0  | 45.04  | 3.06  |
| -7 | 8 | 0  | 42.18  | 3.25  |
| -7 | 8 | 0  | 43.05  | 2.98  |
| -7 | 8 | 0  | 40.62  | 2.50  |
| -7 | 8 | 0  | 41.15  | 2.35  |
| -7 | 8 | 0  | 40.97  | 3.42  |
| -7 | 8 | 0  | 47.22  | 3.49  |
| -7 | 8 | 0  | 35.85  | 3.17  |
| -7 | 8 | 0  | 42.19  | 3.70  |
| -7 | 8 | 1  | 444.51 | 8.95  |
| -7 | 8 | 1  | 431.18 | 9.62  |
| -7 | 8 | 1  | 435.29 | 8.46  |
| -7 | 8 | 1  | 449.24 | 10.31 |
| -7 | 8 | 1  | 426.93 | 10.28 |
| -7 | 8 | 1  | 422.22 | 7.98  |
| -7 | 8 | 1  | 422.97 | 9.66  |
| -7 | 8 | 1  | 435.36 | 10.44 |
| -7 | 8 | 1  | 452.78 | 9.18  |
| -7 | 8 | 1  | 466.73 | 10.35 |
| -7 | 8 | 2  | 177.49 | 5.25  |
| -7 | 8 | 2  | 187.26 | 6.35  |
| -7 | 8 | 2  | 184.23 | 6.25  |
| -7 | 8 | 2  | 186.77 | 6.29  |
| -7 | 8 | 2  | 183.45 | 5.30  |
| -7 | 8 | 2  | 184.93 | 6.60  |
| -7 | 8 | 2  | 171.88 | 6.46  |

## CIF 31

|    |   |   |        |       |
|----|---|---|--------|-------|
| -7 | 8 | 2 | 193.08 | 5.80  |
| -7 | 8 | 2 | 198.13 | 7.44  |
| -7 | 8 | 2 | 197.29 | 6.79  |
| -7 | 8 | 2 | 182.94 | 5.91  |
| -7 | 8 | 2 | 189.01 | 6.50  |
| -7 | 8 | 3 | 202.83 | 6.18  |
| -7 | 8 | 3 | 192.79 | 5.46  |
| -7 | 8 | 3 | 202.09 | 6.63  |
| -7 | 8 | 3 | 182.38 | 5.59  |
| -7 | 8 | 3 | 157.09 | 6.63  |
| -7 | 8 | 3 | 188.49 | 5.95  |
| -7 | 8 | 3 | 185.20 | 6.47  |
| -7 | 8 | 3 | 183.62 | 6.38  |
| -7 | 8 | 3 | 148.37 | 4.51  |
| -7 | 8 | 3 | 192.58 | 6.26  |
| -7 | 8 | 3 | 205.04 | 6.74  |
| -7 | 8 | 3 | 219.82 | 7.22  |
| -7 | 8 | 4 | 505.50 | 9.18  |
| -7 | 8 | 4 | 490.74 | 10.75 |
| -7 | 8 | 4 | 510.54 | 11.06 |
| -7 | 8 | 4 | 536.81 | 8.96  |
| -7 | 8 | 4 | 525.57 | 9.25  |
| -7 | 8 | 4 | 510.09 | 11.18 |
| -7 | 8 | 4 | 502.77 | 11.42 |
| -7 | 8 | 4 | 492.35 | 11.00 |
| -7 | 8 | 4 | 524.53 | 9.42  |
| -7 | 8 | 4 | 508.95 | 10.11 |
| -7 | 8 | 4 | 476.42 | 11.56 |
| -7 | 8 | 4 | 474.83 | 10.10 |
| -7 | 8 | 4 | 430.85 | 10.35 |
| -7 | 8 | 4 | 516.58 | 10.50 |
| -7 | 8 | 5 | 1.95   | 1.04  |
| -7 | 8 | 5 | 4.53   | 1.40  |
| -7 | 8 | 5 | 1.62   | 1.39  |
| -7 | 8 | 5 | 2.92   | 0.96  |
| -7 | 8 | 5 | 0.80   | 0.97  |
| -7 | 8 | 5 | 0.80   | 1.28  |
| -7 | 8 | 5 | 1.44   | 0.81  |
| -7 | 8 | 5 | 1.50   | 1.44  |
| -7 | 8 | 5 | 2.07   | 0.90  |
| -7 | 8 | 5 | -0.06  | 1.23  |

## CIF 31

|    |   |    |        |      |
|----|---|----|--------|------|
| -7 | 8 | 5  | 2.70   | 1.36 |
| -7 | 8 | 6  | 35.74  | 2.97 |
| -7 | 8 | 6  | 35.67  | 2.86 |
| -7 | 8 | 6  | 37.13  | 2.79 |
| -7 | 8 | 6  | 31.49  | 1.99 |
| -7 | 8 | 6  | 34.64  | 2.19 |
| -7 | 8 | 6  | 36.67  | 2.88 |
| -7 | 8 | 6  | 37.13  | 2.56 |
| -7 | 8 | 6  | 37.66  | 3.24 |
| -7 | 8 | 6  | 36.10  | 2.95 |
| -7 | 8 | 6  | 32.04  | 2.23 |
| -7 | 8 | 7  | 60.05  | 2.84 |
| -7 | 8 | 7  | 53.80  | 2.74 |
| -7 | 8 | 7  | 53.83  | 3.37 |
| -7 | 8 | 7  | 54.21  | 3.28 |
| -7 | 8 | 7  | 49.04  | 3.04 |
| -7 | 8 | 7  | 46.83  | 2.36 |
| -7 | 8 | 7  | 65.05  | 3.60 |
| -7 | 8 | 7  | 58.22  | 3.49 |
| -7 | 8 | 7  | 64.01  | 3.79 |
| -7 | 8 | 7  | 55.68  | 3.10 |
| -7 | 8 | 7  | 50.96  | 2.36 |
| -7 | 8 | 7  | 55.88  | 3.47 |
| -7 | 8 | 8  | 427.38 | 9.06 |
| -7 | 8 | 8  | 426.80 | 8.44 |
| -7 | 8 | 8  | 444.64 | 9.32 |
| -7 | 8 | 8  | 429.93 | 7.76 |
| -7 | 8 | 8  | 446.10 | 9.01 |
| -7 | 8 | 8  | 406.15 | 8.53 |
| -7 | 8 | 8  | 406.14 | 8.79 |
| -7 | 8 | 9  | 70.28  | 3.35 |
| -7 | 8 | 9  | 64.43  | 2.97 |
| -7 | 8 | 9  | 62.86  | 2.67 |
| -7 | 8 | 9  | 58.86  | 3.12 |
| -7 | 8 | 9  | 59.69  | 2.74 |
| -7 | 8 | 9  | 66.43  | 3.17 |
| -7 | 8 | 9  | 61.60  | 3.02 |
| -7 | 8 | 10 | 40.03  | 1.84 |
| -7 | 8 | 10 | 40.98  | 2.22 |
| -7 | 8 | 10 | 38.51  | 2.08 |
| -7 | 8 | 11 | 47.08  | 1.76 |

## CIF 31

|    |   |    |        |       |
|----|---|----|--------|-------|
| -7 | 8 | 11 | 51.32  | 1.96  |
| -7 | 9 | -9 | 666.40 | 8.14  |
| -7 | 9 | -8 | 2.06   | 2.39  |
| -7 | 9 | -8 | 2.29   | 0.63  |
| -7 | 9 | -8 | 2.88   | 0.90  |
| -7 | 9 | -7 | 68.47  | 2.73  |
| -7 | 9 | -7 | 66.90  | 3.33  |
| -7 | 9 | -7 | 69.40  | 2.32  |
| -7 | 9 | -6 | 27.57  | 2.68  |
| -7 | 9 | -6 | 29.89  | 2.60  |
| -7 | 9 | -6 | 32.78  | 1.72  |
| -7 | 9 | -6 | 35.45  | 2.13  |
| -7 | 9 | -6 | 34.04  | 2.65  |
| -7 | 9 | -5 | 77.73  | 2.63  |
| -7 | 9 | -5 | 76.02  | 4.36  |
| -7 | 9 | -5 | 65.21  | 3.63  |
| -7 | 9 | -5 | 77.38  | 3.24  |
| -7 | 9 | -5 | 79.57  | 3.23  |
| -7 | 9 | -5 | 72.95  | 3.02  |
| -7 | 9 | -4 | 3.07   | 0.76  |
| -7 | 9 | -4 | 4.95   | 1.70  |
| -7 | 9 | -4 | 5.69   | 1.65  |
| -7 | 9 | -4 | 3.46   | 1.21  |
| -7 | 9 | -4 | 3.97   | 1.03  |
| -7 | 9 | -4 | 3.54   | 1.15  |
| -7 | 9 | -4 | 3.23   | 1.67  |
| -7 | 9 | -3 | 0.54   | 0.80  |
| -7 | 9 | -3 | 0.69   | 0.97  |
| -7 | 9 | -3 | 0.58   | 0.94  |
| -7 | 9 | -3 | 1.16   | 1.42  |
| -7 | 9 | -3 | 0.71   | 0.89  |
| -7 | 9 | -3 | 1.65   | 1.42  |
| -7 | 9 | -2 | 639.32 | 12.27 |
| -7 | 9 | -2 | 644.58 | 13.37 |
| -7 | 9 | -2 | 620.65 | 9.28  |
| -7 | 9 | -2 | 660.87 | 10.50 |
| -7 | 9 | -2 | 656.87 | 13.93 |
| -7 | 9 | -1 | 54.68  | 3.32  |
| -7 | 9 | -1 | 54.62  | 4.13  |
| -7 | 9 | -1 | 50.45  | 3.66  |
| -7 | 9 | -1 | 58.02  | 3.16  |



## CIF 31

|    |   |    |        |       |
|----|---|----|--------|-------|
| -7 | 9 | -1 | 57.48  | 3.64  |
| -7 | 9 | -1 | 59.83  | 3.34  |
| -7 | 9 | -1 | 57.32  | 3.74  |
| -7 | 9 | -1 | 57.84  | 2.85  |
| -7 | 9 | 0  | 176.41 | 6.43  |
| -7 | 9 | 0  | 189.11 | 6.25  |
| -7 | 9 | 0  | 184.34 | 7.42  |
| -7 | 9 | 0  | 188.11 | 6.04  |
| -7 | 9 | 0  | 191.70 | 5.18  |
| -7 | 9 | 0  | 185.75 | 6.65  |
| -7 | 9 | 0  | 177.41 | 6.70  |
| -7 | 9 | 0  | 169.72 | 6.44  |
| -7 | 9 | 0  | 185.31 | 5.86  |
| -7 | 9 | 1  | 47.34  | 3.19  |
| -7 | 9 | 1  | 41.16  | 3.27  |
| -7 | 9 | 1  | 37.01  | 3.62  |
| -7 | 9 | 1  | 41.50  | 3.32  |
| -7 | 9 | 1  | 47.69  | 2.75  |
| -7 | 9 | 1  | 43.56  | 2.74  |
| -7 | 9 | 1  | 52.20  | 3.27  |
| -7 | 9 | 1  | 41.13  | 3.24  |
| -7 | 9 | 1  | 44.31  | 3.23  |
| -7 | 9 | 1  | 44.28  | 2.62  |
| -7 | 9 | 2  | 481.51 | 10.79 |
| -7 | 9 | 2  | 486.21 | 9.82  |
| -7 | 9 | 2  | 505.53 | 9.38  |
| -7 | 9 | 2  | 488.46 | 12.13 |
| -7 | 9 | 2  | 510.74 | 10.59 |
| -7 | 9 | 2  | 516.26 | 11.26 |
| -7 | 9 | 2  | 515.95 | 10.92 |
| -7 | 9 | 2  | 492.47 | 8.70  |
| -7 | 9 | 2  | 498.77 | 11.13 |
| -7 | 9 | 2  | 508.57 | 9.39  |
| -7 | 9 | 2  | 482.84 | 11.00 |
| -7 | 9 | 3  | 1.01   | 0.88  |
| -7 | 9 | 3  | 0.49   | 1.00  |
| -7 | 9 | 3  | 2.68   | 1.60  |
| -7 | 9 | 3  | 0.73   | 1.57  |
| -7 | 9 | 3  | 4.21   | 1.38  |
| -7 | 9 | 3  | 1.75   | 0.81  |
| -7 | 9 | 3  | 1.56   | 1.48  |

## CIF 31

|    |   |   |        |      |
|----|---|---|--------|------|
| -7 | 9 | 3 | 0.19   | 1.10 |
| -7 | 9 | 3 | 1.40   | 1.13 |
| -7 | 9 | 3 | 1.96   | 1.01 |
| -7 | 9 | 4 | 17.59  | 2.47 |
| -7 | 9 | 4 | 20.36  | 1.66 |
| -7 | 9 | 4 | 19.92  | 1.84 |
| -7 | 9 | 4 | 18.14  | 2.30 |
| -7 | 9 | 4 | 16.00  | 2.00 |
| -7 | 9 | 4 | 18.49  | 2.27 |
| -7 | 9 | 4 | 14.40  | 2.25 |
| -7 | 9 | 4 | 15.89  | 1.99 |
| -7 | 9 | 4 | 17.03  | 2.11 |
| -7 | 9 | 4 | 15.32  | 1.88 |
| -7 | 9 | 4 | 17.60  | 2.29 |
| -7 | 9 | 4 | 18.73  | 1.92 |
| -7 | 9 | 5 | 1.42   | 1.24 |
| -7 | 9 | 5 | 1.21   | 0.66 |
| -7 | 9 | 5 | -0.05  | 0.92 |
| -7 | 9 | 5 | 0.24   | 1.13 |
| -7 | 9 | 5 | 4.32   | 1.18 |
| -7 | 9 | 5 | 0.12   | 1.15 |
| -7 | 9 | 5 | 0.06   | 1.21 |
| -7 | 9 | 5 | 0.70   | 0.68 |
| -7 | 9 | 5 | 0.05   | 1.08 |
| -7 | 9 | 6 | 100.75 | 4.08 |
| -7 | 9 | 6 | 95.21  | 4.25 |
| -7 | 9 | 6 | 105.59 | 4.78 |
| -7 | 9 | 6 | 106.14 | 4.28 |
| -7 | 9 | 6 | 107.48 | 4.50 |
| -7 | 9 | 6 | 98.18  | 4.33 |
| -7 | 9 | 6 | 103.86 | 3.67 |
| -7 | 9 | 7 | 4.46   | 1.29 |
| -7 | 9 | 7 | 3.86   | 1.12 |
| -7 | 9 | 7 | 4.90   | 1.41 |
| -7 | 9 | 7 | 4.18   | 1.03 |
| -7 | 9 | 7 | 5.41   | 1.46 |
| -7 | 9 | 7 | 3.40   | 1.18 |
| -7 | 9 | 7 | 5.71   | 1.28 |
| -7 | 9 | 7 | 4.12   | 1.33 |
| -7 | 9 | 8 | 3.33   | 1.03 |
| -7 | 9 | 8 | 2.60   | 0.97 |

## CIF 31

|    |    |    |        |      |
|----|----|----|--------|------|
| -7 | 9  | 8  | 4.53   | 1.19 |
| -7 | 9  | 8  | 4.06   | 1.11 |
| -7 | 9  | 8  | 2.85   | 1.11 |
| -7 | 9  | 8  | 3.15   | 0.89 |
| -7 | 9  | 9  | 38.98  | 1.81 |
| -7 | 9  | 9  | 40.29  | 2.06 |
| -7 | 10 | -9 | 0.26   | 0.42 |
| -7 | 10 | -8 | 38.44  | 2.53 |
| -7 | 10 | -8 | 37.38  | 1.61 |
| -7 | 10 | -7 | 18.19  | 1.37 |
| -7 | 10 | -7 | 20.01  | 2.42 |
| -7 | 10 | -6 | 16.81  | 2.15 |
| -7 | 10 | -6 | 21.01  | 1.53 |
| -7 | 10 | -6 | 18.75  | 2.25 |
| -7 | 10 | -5 | 38.71  | 2.31 |
| -7 | 10 | -5 | 32.87  | 2.56 |
| -7 | 10 | -5 | 38.99  | 2.07 |
| -7 | 10 | -5 | 39.00  | 1.70 |
| -7 | 10 | -5 | 39.89  | 3.12 |
| -7 | 10 | -4 | 46.34  | 3.22 |
| -7 | 10 | -4 | 49.92  | 2.41 |
| -7 | 10 | -4 | 41.48  | 3.11 |
| -7 | 10 | -4 | 38.80  | 1.99 |
| -7 | 10 | -3 | 45.34  | 2.36 |
| -7 | 10 | -3 | 41.44  | 1.90 |
| -7 | 10 | -3 | 38.44  | 2.31 |
| -7 | 10 | -3 | 38.94  | 3.23 |
| -7 | 10 | -3 | 33.41  | 3.00 |
| -7 | 10 | -3 | 34.44  | 3.18 |
| -7 | 10 | -2 | 95.02  | 4.83 |
| -7 | 10 | -2 | 96.47  | 4.25 |
| -7 | 10 | -2 | 100.42 | 4.94 |
| -7 | 10 | -2 | 110.29 | 3.84 |
| -7 | 10 | -2 | 101.58 | 4.66 |
| -7 | 10 | -2 | 97.37  | 5.11 |
| -7 | 10 | -1 | 2.88   | 1.24 |
| -7 | 10 | -1 | 3.03   | 1.37 |
| -7 | 10 | -1 | 2.33   | 1.54 |
| -7 | 10 | -1 | 1.76   | 1.15 |
| -7 | 10 | -1 | 2.15   | 1.47 |
| -7 | 10 | -1 | 2.06   | 1.10 |

## CIF 31

|    |    |   |        |      |
|----|----|---|--------|------|
| -7 | 10 | 0 | 223.47 | 5.57 |
| -7 | 10 | 0 | 203.76 | 6.64 |
| -7 | 10 | 0 | 201.55 | 6.70 |
| -7 | 10 | 0 | 212.30 | 7.01 |
| -7 | 10 | 0 | 208.55 | 6.41 |
| -7 | 10 | 0 | 212.01 | 6.98 |
| -7 | 10 | 0 | 221.45 | 6.32 |
| -7 | 10 | 0 | 203.10 | 5.82 |
| -7 | 10 | 1 | 95.11  | 3.52 |
| -7 | 10 | 1 | 88.50  | 4.24 |
| -7 | 10 | 1 | 97.08  | 4.22 |
| -7 | 10 | 1 | 91.65  | 4.99 |
| -7 | 10 | 1 | 94.88  | 4.63 |
| -7 | 10 | 1 | 77.43  | 4.25 |
| -7 | 10 | 1 | 87.47  | 4.00 |
| -7 | 10 | 1 | 88.38  | 3.64 |
| -7 | 10 | 1 | 92.65  | 4.44 |
| -7 | 10 | 1 | 96.72  | 4.52 |
| -7 | 10 | 2 | 99.90  | 5.08 |
| -7 | 10 | 2 | 108.99 | 3.99 |
| -7 | 10 | 2 | 106.96 | 4.45 |
| -7 | 10 | 2 | 88.97  | 3.98 |
| -7 | 10 | 2 | 103.88 | 4.78 |
| -7 | 10 | 2 | 105.02 | 3.80 |
| -7 | 10 | 2 | 96.65  | 3.83 |
| -7 | 10 | 2 | 97.05  | 4.47 |
| -7 | 10 | 2 | 117.23 | 3.78 |
| -7 | 10 | 2 | 97.25  | 4.56 |
| -7 | 10 | 2 | 106.99 | 4.65 |
| -7 | 10 | 2 | 90.89  | 4.53 |
| -7 | 10 | 3 | 195.23 | 6.44 |
| -7 | 10 | 3 | 169.50 | 6.03 |
| -7 | 10 | 3 | 179.55 | 5.10 |
| -7 | 10 | 3 | 184.08 | 5.50 |
| -7 | 10 | 3 | 165.02 | 5.85 |
| -7 | 10 | 3 | 176.24 | 5.76 |
| -7 | 10 | 3 | 185.36 | 5.95 |
| -7 | 10 | 3 | 173.83 | 6.47 |
| -7 | 10 | 3 | 192.51 | 6.14 |
| -7 | 10 | 4 | 73.63  | 3.69 |
| -7 | 10 | 4 | 76.19  | 3.38 |

## CIF 31

|    |    |    |        |      |
|----|----|----|--------|------|
| -7 | 10 | 4  | 84.62  | 3.99 |
| -7 | 10 | 4  | 82.84  | 4.19 |
| -7 | 10 | 4  | 77.86  | 4.02 |
| -7 | 10 | 4  | 86.69  | 3.30 |
| -7 | 10 | 4  | 87.84  | 4.11 |
| -7 | 10 | 4  | 81.41  | 3.69 |
| -7 | 10 | 4  | 81.42  | 4.01 |
| -7 | 10 | 4  | 85.92  | 3.49 |
| -7 | 10 | 5  | 279.14 | 7.12 |
| -7 | 10 | 5  | 310.87 | 6.63 |
| -7 | 10 | 5  | 230.26 | 6.01 |
| -7 | 10 | 5  | 294.07 | 7.19 |
| -7 | 10 | 5  | 273.61 | 6.79 |
| -7 | 10 | 5  | 290.95 | 6.23 |
| -7 | 10 | 5  | 231.38 | 6.17 |
| -7 | 10 | 6  | 4.06   | 1.11 |
| -7 | 10 | 6  | 3.95   | 1.33 |
| -7 | 10 | 6  | 2.91   | 1.01 |
| -7 | 10 | 6  | 2.61   | 1.18 |
| -7 | 10 | 6  | 3.65   | 1.04 |
| -7 | 10 | 6  | 3.73   | 1.06 |
| -7 | 10 | 6  | 3.10   | 0.93 |
| -7 | 10 | 7  | 1.20   | 0.86 |
| -7 | 10 | 7  | 1.39   | 0.72 |
| -7 | 10 | 7  | 1.35   | 0.80 |
| -7 | 10 | 7  | 0.92   | 0.85 |
| -7 | 10 | 7  | 0.94   | 0.93 |
| -7 | 10 | 8  | 44.15  | 1.87 |
| -7 | 10 | 8  | 45.39  | 1.91 |
| -7 | 10 | 8  | 59.82  | 2.21 |
| -7 | 10 | 8  | 57.85  | 2.25 |
| -7 | 11 | -7 | 77.61  | 2.04 |
| -7 | 11 | -6 | 0.23   | 0.61 |
| -7 | 11 | -6 | 0.25   | 0.97 |
| -7 | 11 | -5 | 0.99   | 0.70 |
| -7 | 11 | -5 | 0.59   | 1.20 |
| -7 | 11 | -5 | 0.35   | 0.94 |
| -7 | 11 | -4 | 9.59   | 1.67 |
| -7 | 11 | -4 | 9.90   | 1.66 |
| -7 | 11 | -4 | 14.43  | 1.28 |
| -7 | 11 | -3 | 5.32   | 1.57 |

## CIF 31

|    |    |    |        |      |
|----|----|----|--------|------|
| -7 | 11 | -3 | 5.79   | 1.54 |
| -7 | 11 | -3 | 4.94   | 1.54 |
| -7 | 11 | -3 | 5.73   | 1.00 |
| -7 | 11 | -2 | 5.45   | 1.51 |
| -7 | 11 | -2 | 8.19   | 1.09 |
| -7 | 11 | -2 | 5.12   | 1.13 |
| -7 | 11 | -2 | 4.59   | 1.57 |
| -7 | 11 | -2 | 6.64   | 1.81 |
| -7 | 11 | -1 | 36.83  | 2.76 |
| -7 | 11 | -1 | 33.74  | 2.47 |
| -7 | 11 | -1 | 37.18  | 2.89 |
| -7 | 11 | -1 | 35.68  | 2.39 |
| -7 | 11 | -1 | 34.73  | 3.13 |
| -7 | 11 | 0  | 214.63 | 6.48 |
| -7 | 11 | 0  | 205.44 | 6.40 |
| -7 | 11 | 0  | 206.11 | 6.13 |
| -7 | 11 | 0  | 194.74 | 6.05 |
| -7 | 11 | 0  | 202.52 | 5.92 |
| -7 | 11 | 0  | 214.50 | 5.53 |
| -7 | 11 | 1  | 230.83 | 7.19 |
| -7 | 11 | 1  | 238.07 | 6.12 |
| -7 | 11 | 1  | 240.69 | 6.71 |
| -7 | 11 | 1  | 211.99 | 5.96 |
| -7 | 11 | 1  | 231.93 | 6.70 |
| -7 | 11 | 1  | 231.17 | 6.57 |
| -7 | 11 | 1  | 233.25 | 6.42 |
| -7 | 11 | 2  | 134.03 | 4.72 |
| -7 | 11 | 2  | 146.16 | 4.78 |
| -7 | 11 | 2  | 133.73 | 4.84 |
| -7 | 11 | 2  | 124.51 | 5.14 |
| -7 | 11 | 2  | 142.93 | 4.49 |
| -7 | 11 | 2  | 129.51 | 4.87 |
| -7 | 11 | 2  | 132.61 | 4.89 |
| -7 | 11 | 3  | 243.38 | 6.59 |
| -7 | 11 | 3  | 222.95 | 5.65 |
| -7 | 11 | 3  | 252.75 | 6.28 |
| -7 | 11 | 3  | 246.50 | 6.36 |
| -7 | 11 | 3  | 211.49 | 6.28 |
| -7 | 11 | 3  | 237.93 | 5.95 |
| -7 | 11 | 3  | 234.99 | 6.44 |
| -7 | 11 | 4  | 47.63  | 2.32 |

## CIF 31

|    |    |    |        |      |
|----|----|----|--------|------|
| -7 | 11 | 4  | 50.71  | 2.99 |
| -7 | 11 | 4  | 58.00  | 2.86 |
| -7 | 11 | 4  | 45.94  | 2.55 |
| -7 | 11 | 4  | 49.44  | 2.80 |
| -7 | 11 | 4  | 54.48  | 2.32 |
| -7 | 11 | 5  | 121.82 | 3.92 |
| -7 | 11 | 5  | 123.39 | 3.35 |
| -7 | 11 | 6  | 164.40 | 4.20 |
| -7 | 11 | 6  | 148.97 | 3.41 |
| -7 | 12 | -6 | 1.76   | 0.72 |
| -7 | 12 | -5 | 20.29  | 1.72 |
| -7 | 12 | -5 | 12.73  | 0.76 |
| -7 | 12 | -4 | 50.56  | 2.60 |
| -7 | 12 | -4 | 58.97  | 1.73 |
| -7 | 12 | -3 | 15.13  | 1.80 |
| -7 | 12 | -3 | 16.24  | 1.73 |
| -7 | 12 | -3 | 17.68  | 1.08 |
| -7 | 12 | -3 | 18.38  | 1.84 |
| -7 | 12 | -2 | 110.73 | 2.62 |
| -7 | 12 | -2 | 108.66 | 4.04 |
| -7 | 12 | -2 | 99.78  | 4.19 |
| -7 | 12 | -1 | 9.74   | 1.64 |
| -7 | 12 | -1 | 10.18  | 1.55 |
| -7 | 12 | -1 | 10.01  | 1.40 |
| -7 | 12 | -1 | 8.63   | 0.86 |
| -7 | 12 | 0  | 34.52  | 2.62 |
| -7 | 12 | 0  | 35.48  | 2.10 |
| -7 | 12 | 0  | 29.27  | 1.98 |
| -7 | 12 | 0  | 31.22  | 1.40 |
| -7 | 12 | 0  | 33.88  | 2.32 |
| -7 | 12 | 1  | 0.65   | 0.87 |
| -7 | 12 | 1  | 1.08   | 0.95 |
| -7 | 12 | 1  | 1.10   | 1.06 |
| -7 | 12 | 2  | 8.16   | 1.27 |
| -7 | 12 | 2  | 7.56   | 1.09 |
| -7 | 12 | 2  | 6.84   | 1.28 |
| -7 | 12 | 2  | 9.65   | 1.16 |
| -7 | 12 | 3  | 230.54 | 5.28 |
| -7 | 12 | 3  | 260.94 | 5.08 |
| -7 | 12 | 4  | 12.14  | 1.22 |
| -7 | 12 | 4  | 9.96   | 1.02 |

## CIF 31

|    |    |    |        |      |
|----|----|----|--------|------|
| -7 | 13 | -2 | 140.01 | 3.68 |
| -7 | 13 | -1 | 215.69 | 4.37 |
| -6 | -8 | 1  | 46.57  | 1.47 |
| -6 | -8 | 1  | 37.72  | 1.19 |
| -6 | -8 | 2  | 6.22   | 0.55 |
| -6 | -8 | 2  | 5.62   | 0.59 |
| -6 | -8 | 3  | 78.46  | 2.06 |
| -6 | -8 | 3  | 80.10  | 2.25 |
| -6 | -8 | 4  | 1.02   | 0.61 |
| -6 | -8 | 5  | 2.42   | 0.94 |
| -6 | -8 | 5  | 3.40   | 0.68 |
| -6 | -8 | 6  | 41.87  | 1.59 |
| -6 | -8 | 6  | 33.99  | 2.00 |
| -6 | -8 | 7  | 22.27  | 1.66 |
| -6 | -8 | 7  | 23.62  | 1.62 |
| -6 | -8 | 7  | 20.36  | 1.02 |
| -6 | -8 | 8  | 0.64   | 0.67 |
| -6 | -8 | 8  | 1.08   | 0.57 |
| -6 | -8 | 8  | 1.75   | 0.77 |
| -6 | -8 | 9  | 9.68   | 1.06 |
| -6 | -8 | 9  | 8.63   | 0.67 |
| -6 | -8 | 9  | 10.31  | 1.03 |
| -6 | -8 | 10 | 23.36  | 1.32 |
| -6 | -8 | 10 | 25.82  | 1.35 |
| -6 | -7 | -1 | 25.29  | 1.25 |
| -6 | -7 | -1 | 24.33  | 1.22 |
| -6 | -7 | 0  | 117.01 | 2.93 |
| -6 | -7 | 0  | 116.09 | 2.95 |
| -6 | -7 | 1  | 7.74   | 0.96 |
| -6 | -7 | 1  | 8.26   | 1.10 |
| -6 | -7 | 1  | 7.86   | 0.83 |
| -6 | -7 | 2  | 39.30  | 1.84 |
| -6 | -7 | 3  | 83.32  | 2.86 |
| -6 | -7 | 3  | 74.11  | 3.35 |
| -6 | -7 | 3  | 79.07  | 2.57 |
| -6 | -7 | 4  | 165.12 | 4.02 |
| -6 | -7 | 4  | 159.86 | 4.92 |
| -6 | -7 | 4  | 153.44 | 4.92 |
| -6 | -7 | 4  | 150.01 | 3.45 |
| -6 | -7 | 5  | 14.86  | 1.78 |
| -6 | -7 | 5  | 17.80  | 1.79 |



## CIF 31

|    |    |    |        |      |
|----|----|----|--------|------|
| -6 | -7 | 5  | 14.60  | 1.74 |
| -6 | -7 | 5  | 16.62  | 1.39 |
| -6 | -7 | 6  | 125.35 | 4.21 |
| -6 | -7 | 6  | 131.16 | 3.43 |
| -6 | -7 | 6  | 124.80 | 4.42 |
| -6 | -7 | 6  | 127.29 | 4.45 |
| -6 | -7 | 7  | 0.17   | 0.96 |
| -6 | -7 | 7  | 0.64   | 1.01 |
| -6 | -7 | 7  | 0.10   | 0.56 |
| -6 | -7 | 8  | 50.29  | 2.60 |
| -6 | -7 | 8  | 49.03  | 2.73 |
| -6 | -7 | 8  | 43.48  | 1.61 |
| -6 | -7 | 9  | 1.93   | 0.91 |
| -6 | -7 | 9  | 2.14   | 0.68 |
| -6 | -7 | 9  | 2.01   | 1.00 |
| -6 | -7 | 10 | 35.42  | 2.03 |
| -6 | -7 | 10 | 31.99  | 1.29 |
| -6 | -7 | 10 | 41.06  | 2.25 |
| -6 | -7 | 10 | 40.27  | 2.13 |
| -6 | -7 | 11 | 1.56   | 0.75 |
| -6 | -7 | 11 | 1.69   | 0.75 |
| -6 | -7 | 11 | 1.35   | 0.73 |
| -6 | -7 | 12 | 0.75   | 0.55 |
| -6 | -7 | 12 | 0.94   | 0.56 |
| -6 | -6 | -3 | 92.17  | 2.25 |
| -6 | -6 | -2 | 30.37  | 1.57 |
| -6 | -6 | -2 | 29.40  | 1.63 |
| -6 | -6 | -1 | 273.71 | 5.28 |
| -6 | -6 | -1 | 266.66 | 5.26 |
| -6 | -6 | 0  | 170.39 | 3.66 |
| -6 | -6 | 0  | 179.24 | 4.39 |
| -6 | -6 | 1  | 232.61 | 5.17 |
| -6 | -6 | 2  | 248.14 | 6.76 |
| -6 | -6 | 2  | 309.25 | 6.02 |
| -6 | -6 | 2  | 254.13 | 6.82 |
| -6 | -6 | 2  | 314.29 | 6.34 |
| -6 | -6 | 3  | 338.61 | 6.68 |
| -6 | -6 | 3  | 329.05 | 6.24 |
| -6 | -6 | 3  | 337.19 | 8.09 |
| -6 | -6 | 3  | 337.81 | 8.00 |
| -6 | -6 | 3  | 335.86 | 7.57 |

## CIF 31

|    |    |    |        |       |
|----|----|----|--------|-------|
| -6 | -6 | 4  | 574.38 | 8.51  |
| -6 | -6 | 4  | 585.36 | 10.95 |
| -6 | -6 | 4  | 592.53 | 10.93 |
| -6 | -6 | 4  | 608.66 | 9.30  |
| -6 | -6 | 5  | 65.24  | 3.57  |
| -6 | -6 | 5  | 79.38  | 3.92  |
| -6 | -6 | 5  | 75.04  | 3.55  |
| -6 | -6 | 5  | 79.82  | 3.91  |
| -6 | -6 | 5  | 78.44  | 2.98  |
| -6 | -6 | 5  | 69.75  | 3.84  |
| -6 | -6 | 6  | 80.98  | 4.10  |
| -6 | -6 | 6  | 94.40  | 3.18  |
| -6 | -6 | 6  | 87.10  | 4.02  |
| -6 | -6 | 6  | 82.60  | 3.89  |
| -6 | -6 | 6  | 93.69  | 3.54  |
| -6 | -6 | 6  | 86.99  | 4.07  |
| -6 | -6 | 6  | 88.55  | 3.87  |
| -6 | -6 | 7  | 19.01  | 2.13  |
| -6 | -6 | 7  | 16.79  | 1.34  |
| -6 | -6 | 7  | 17.40  | 1.91  |
| -6 | -6 | 7  | 14.92  | 1.86  |
| -6 | -6 | 7  | 19.03  | 2.15  |
| -6 | -6 | 7  | 18.75  | 2.09  |
| -6 | -6 | 7  | 16.99  | 1.66  |
| -6 | -6 | 8  | 52.79  | 3.14  |
| -6 | -6 | 8  | 58.66  | 3.13  |
| -6 | -6 | 8  | 54.22  | 2.74  |
| -6 | -6 | 8  | 54.94  | 2.95  |
| -6 | -6 | 9  | 119.05 | 4.26  |
| -6 | -6 | 9  | 117.93 | 3.94  |
| -6 | -6 | 9  | 97.35  | 3.65  |
| -6 | -6 | 9  | 114.62 | 4.14  |
| -6 | -6 | 9  | 100.51 | 4.06  |
| -6 | -6 | 10 | 447.09 | 8.59  |
| -6 | -6 | 10 | 441.95 | 6.38  |
| -6 | -6 | 10 | 436.70 | 8.27  |
| -6 | -6 | 10 | 435.80 | 7.86  |
| -6 | -6 | 11 | 286.42 | 6.00  |
| -6 | -6 | 11 | 277.48 | 6.13  |
| -6 | -6 | 12 | 1.41   | 0.84  |
| -6 | -6 | 12 | 1.24   | 0.83  |

## CIF 31

|    |    |    |        |      |
|----|----|----|--------|------|
| -6 | -6 | 12 | 2.21   | 0.81 |
| -6 | -6 | 13 | 11.65  | 1.05 |
| -6 | -6 | 13 | 12.99  | 1.11 |
| -6 | -5 | -5 | 43.39  | 1.55 |
| -6 | -5 | -4 | 45.90  | 1.97 |
| -6 | -5 | -4 | 51.82  | 1.88 |
| -6 | -5 | -3 | 2.56   | 0.82 |
| -6 | -5 | -2 | 335.88 | 6.14 |
| -6 | -5 | -2 | 357.37 | 6.64 |
| -6 | -5 | -2 | 339.83 | 6.40 |
| -6 | -5 | -1 | 0.15   | 0.54 |
| -6 | -5 | -1 | 0.27   | 0.81 |
| -6 | -5 | -1 | 0.13   | 0.87 |
| -6 | -5 | -1 | 1.30   | 0.78 |
| -6 | -5 | 0  | 2.52   | 0.84 |
| -6 | -5 | 0  | 2.84   | 1.13 |
| -6 | -5 | 0  | 3.32   | 1.04 |
| -6 | -5 | 1  | 475.04 | 9.91 |
| -6 | -5 | 1  | 470.72 | 9.86 |
| -6 | -5 | 2  | 19.06  | 2.14 |
| -6 | -5 | 2  | 19.65  | 1.69 |
| -6 | -5 | 2  | 17.84  | 1.94 |
| -6 | -5 | 2  | 17.68  | 2.07 |
| -6 | -5 | 2  | 17.14  | 1.70 |
| -6 | -5 | 3  | 54.71  | 3.13 |
| -6 | -5 | 3  | 62.12  | 2.68 |
| -6 | -5 | 3  | 48.92  | 3.24 |
| -6 | -5 | 3  | 63.40  | 2.94 |
| -6 | -5 | 3  | 53.00  | 3.31 |
| -6 | -5 | 3  | 49.21  | 3.37 |
| -6 | -5 | 4  | 2.27   | 1.34 |
| -6 | -5 | 4  | 1.84   | 0.78 |
| -6 | -5 | 4  | 1.53   | 0.95 |
| -6 | -5 | 4  | 2.50   | 1.41 |
| -6 | -5 | 4  | 1.44   | 0.91 |
| -6 | -5 | 4  | 1.97   | 1.29 |
| -6 | -5 | 4  | 2.13   | 1.08 |
| -6 | -5 | 4  | 2.46   | 1.30 |
| -6 | -5 | 5  | 233.13 | 6.79 |
| -6 | -5 | 5  | 224.25 | 6.35 |
| -6 | -5 | 5  | 224.18 | 6.93 |

## CIF 31

|    |    |    |        |      |
|----|----|----|--------|------|
| -6 | -5 | 5  | 212.50 | 6.99 |
| -6 | -5 | 5  | 213.47 | 5.66 |
| -6 | -5 | 5  | 232.93 | 6.66 |
| -6 | -5 | 6  | -0.10  | 0.97 |
| -6 | -5 | 6  | 0.98   | 1.19 |
| -6 | -5 | 6  | 0.60   | 1.28 |
| -6 | -5 | 6  | 0.49   | 1.17 |
| -6 | -5 | 6  | 0.26   | 0.88 |
| -6 | -5 | 6  | 0.85   | 1.29 |
| -6 | -5 | 7  | 1.23   | 1.28 |
| -6 | -5 | 7  | 4.35   | 1.51 |
| -6 | -5 | 7  | 1.45   | 0.70 |
| -6 | -5 | 7  | 1.57   | 1.30 |
| -6 | -5 | 7  | 1.09   | 0.95 |
| -6 | -5 | 7  | 3.22   | 1.20 |
| -6 | -5 | 7  | 0.39   | 1.12 |
| -6 | -5 | 7  | 1.76   | 1.30 |
| -6 | -5 | 8  | 2.76   | 1.04 |
| -6 | -5 | 8  | 3.58   | 1.46 |
| -6 | -5 | 8  | 2.32   | 0.82 |
| -6 | -5 | 8  | 2.10   | 1.18 |
| -6 | -5 | 8  | 4.40   | 1.47 |
| -6 | -5 | 8  | 3.06   | 1.44 |
| -6 | -5 | 8  | 5.19   | 1.38 |
| -6 | -5 | 9  | 154.84 | 4.42 |
| -6 | -5 | 9  | 159.09 | 5.27 |
| -6 | -5 | 9  | 157.13 | 5.40 |
| -6 | -5 | 9  | 168.20 | 5.41 |
| -6 | -5 | 10 | 29.39  | 2.30 |
| -6 | -5 | 10 | 25.66  | 2.20 |
| -6 | -5 | 10 | 30.72  | 2.15 |
| -6 | -5 | 10 | 29.19  | 2.24 |
| -6 | -5 | 10 | 34.64  | 2.10 |
| -6 | -5 | 10 | 31.45  | 1.64 |
| -6 | -5 | 11 | 159.67 | 4.72 |
| -6 | -5 | 11 | 163.08 | 4.61 |
| -6 | -5 | 11 | 172.00 | 4.80 |
| -6 | -5 | 11 | 155.85 | 4.44 |
| -6 | -5 | 11 | 165.78 | 5.08 |
| -6 | -5 | 11 | 173.22 | 4.48 |
| -6 | -5 | 11 | 159.64 | 4.86 |

## CIF 31

|    |    |    |        |      |
|----|----|----|--------|------|
| -6 | -5 | 12 | 50.94  | 2.33 |
| -6 | -5 | 12 | 51.84  | 2.56 |
| -6 | -5 | 12 | 52.79  | 2.73 |
| -6 | -5 | 12 | 57.47  | 2.59 |
| -6 | -5 | 13 | 472.40 | 7.62 |
| -6 | -5 | 13 | 465.44 | 7.64 |
| -6 | -5 | 14 | 3.36   | 0.70 |
| -6 | -5 | 14 | 3.77   | 0.72 |
| -6 | -4 | -6 | 18.63  | 1.16 |
| -6 | -4 | -5 | 25.41  | 1.44 |
| -6 | -4 | -5 | 25.31  | 1.61 |
| -6 | -4 | -5 | 25.37  | 1.51 |
| -6 | -4 | -4 | 321.29 | 6.06 |
| -6 | -4 | -4 | 312.39 | 5.82 |
| -6 | -4 | -4 | 319.28 | 5.92 |
| -6 | -4 | -3 | 142.80 | 3.99 |
| -6 | -4 | -3 | 137.04 | 4.07 |
| -6 | -4 | -3 | 138.94 | 4.02 |
| -6 | -4 | -2 | 196.19 | 5.24 |
| -6 | -4 | -2 | 196.42 | 4.91 |
| -6 | -4 | -2 | 202.46 | 5.11 |
| -6 | -4 | -1 | 221.09 | 5.59 |
| -6 | -4 | -1 | 212.37 | 5.46 |
| -6 | -4 | -1 | 217.69 | 4.68 |
| -6 | -4 | -1 | 214.83 | 5.24 |
| -6 | -4 | -1 | 207.61 | 5.15 |
| -6 | -4 | 0  | 279.51 | 5.95 |
| -6 | -4 | 0  | 278.25 | 6.25 |
| -6 | -4 | 0  | 275.55 | 5.96 |
| -6 | -4 | 1  | 215.17 | 5.51 |
| -6 | -4 | 1  | 212.35 | 5.31 |
| -6 | -4 | 1  | 205.61 | 6.23 |
| -6 | -4 | 1  | 199.42 | 6.11 |
| -6 | -4 | 1  | 192.09 | 4.76 |
| -6 | -4 | 2  | 1.22   | 0.85 |
| -6 | -4 | 2  | 0.05   | 1.17 |
| -6 | -4 | 2  | 1.11   | 0.88 |
| -6 | -4 | 2  | 0.63   | 1.10 |
| -6 | -4 | 2  | 0.13   | 1.31 |
| -6 | -4 | 2  | 3.46   | 1.24 |
| -6 | -4 | 3  | 12.90  | 1.37 |

## CIF 31

|    |    |   |        |      |
|----|----|---|--------|------|
| -6 | -4 | 3 | 20.10  | 2.21 |
| -6 | -4 | 3 | 11.77  | 1.41 |
| -6 | -4 | 3 | 16.25  | 2.21 |
| -6 | -4 | 3 | 14.82  | 1.99 |
| -6 | -4 | 3 | 15.29  | 1.86 |
| -6 | -4 | 3 | 15.69  | 1.89 |
| -6 | -4 | 3 | 15.41  | 2.23 |
| -6 | -4 | 4 | 128.63 | 4.82 |
| -6 | -4 | 4 | 131.40 | 4.97 |
| -6 | -4 | 4 | 136.56 | 4.83 |
| -6 | -4 | 4 | 130.45 | 3.65 |
| -6 | -4 | 4 | 139.11 | 4.25 |
| -6 | -4 | 4 | 134.11 | 4.53 |
| -6 | -4 | 4 | 140.01 | 5.54 |
| -6 | -4 | 4 | 139.54 | 4.15 |
| -6 | -4 | 5 | 52.02  | 3.47 |
| -6 | -4 | 5 | 45.24  | 2.99 |
| -6 | -4 | 5 | 44.18  | 2.72 |
| -6 | -4 | 5 | 48.51  | 3.00 |
| -6 | -4 | 5 | 48.32  | 2.97 |
| -6 | -4 | 5 | 44.36  | 2.90 |
| -6 | -4 | 6 | 0.76   | 1.07 |
| -6 | -4 | 6 | 1.33   | 0.75 |
| -6 | -4 | 6 | 1.32   | 1.03 |
| -6 | -4 | 6 | -0.12  | 1.25 |
| -6 | -4 | 6 | 1.50   | 1.24 |
| -6 | -4 | 6 | 0.31   | 0.94 |
| -6 | -4 | 6 | 1.20   | 1.14 |
| -6 | -4 | 7 | 273.55 | 7.45 |
| -6 | -4 | 7 | 265.35 | 6.60 |
| -6 | -4 | 7 | 223.37 | 6.51 |
| -6 | -4 | 7 | 253.27 | 6.86 |
| -6 | -4 | 7 | 240.09 | 6.89 |
| -6 | -4 | 7 | 249.97 | 5.57 |
| -6 | -4 | 7 | 247.63 | 5.77 |
| -6 | -4 | 7 | 212.48 | 6.47 |
| -6 | -4 | 8 | 208.26 | 6.17 |
| -6 | -4 | 8 | 195.81 | 6.22 |
| -6 | -4 | 8 | 192.12 | 5.01 |
| -6 | -4 | 8 | 199.57 | 5.30 |
| -6 | -4 | 8 | 217.82 | 6.75 |

## CIF 31

|    |    |    |        |      |
|----|----|----|--------|------|
| -6 | -4 | 8  | 200.72 | 5.79 |
| -6 | -4 | 8  | 201.81 | 6.16 |
| -6 | -4 | 8  | 204.75 | 6.07 |
| -6 | -4 | 9  | 70.16  | 3.36 |
| -6 | -4 | 9  | 65.32  | 3.02 |
| -6 | -4 | 9  | 67.38  | 3.49 |
| -6 | -4 | 9  | 62.55  | 3.16 |
| -6 | -4 | 9  | 58.02  | 3.28 |
| -6 | -4 | 9  | 62.16  | 3.54 |
| -6 | -4 | 9  | 55.89  | 3.15 |
| -6 | -4 | 9  | 60.60  | 2.88 |
| -6 | -4 | 9  | 62.96  | 3.60 |
| -6 | -4 | 10 | 147.86 | 4.60 |
| -6 | -4 | 10 | 144.87 | 4.68 |
| -6 | -4 | 10 | 129.60 | 4.54 |
| -6 | -4 | 10 | 145.01 | 4.48 |
| -6 | -4 | 10 | 132.15 | 3.44 |
| -6 | -4 | 10 | 135.04 | 5.02 |
| -6 | -4 | 10 | 127.83 | 4.64 |
| -6 | -4 | 10 | 142.12 | 5.05 |
| -6 | -4 | 11 | 309.20 | 6.58 |
| -6 | -4 | 11 | 265.00 | 6.52 |
| -6 | -4 | 11 | 316.17 | 6.81 |
| -6 | -4 | 11 | 288.94 | 7.09 |
| -6 | -4 | 11 | 310.06 | 6.97 |
| -6 | -4 | 11 | 276.37 | 6.41 |
| -6 | -4 | 11 | 307.19 | 7.07 |
| -6 | -4 | 11 | 304.61 | 7.26 |
| -6 | -4 | 11 | 302.34 | 6.66 |
| -6 | -4 | 12 | 209.43 | 5.31 |
| -6 | -4 | 12 | 194.11 | 5.03 |
| -6 | -4 | 12 | 212.77 | 5.23 |
| -6 | -4 | 12 | 213.30 | 5.75 |
| -6 | -4 | 12 | 223.35 | 5.62 |
| -6 | -4 | 12 | 194.85 | 5.46 |
| -6 | -4 | 12 | 194.98 | 5.30 |
| -6 | -4 | 12 | 207.84 | 5.01 |
| -6 | -4 | 13 | 203.38 | 4.84 |
| -6 | -4 | 13 | 192.25 | 5.06 |
| -6 | -4 | 14 | 142.55 | 3.74 |
| -6 | -4 | 14 | 148.95 | 3.62 |

## CIF 31

|    |    |    |         |       |
|----|----|----|---------|-------|
| -6 | -4 | 14 | 149.37  | 3.79  |
| -6 | -4 | 15 | 233.47  | 3.93  |
| -6 | -3 | -7 | 0.68    | 0.57  |
| -6 | -3 | -7 | 0.16    | 1.29  |
| -6 | -3 | -6 | 59.21   | 2.10  |
| -6 | -3 | -6 | 57.29   | 2.32  |
| -6 | -3 | -6 | 60.26   | 2.40  |
| -6 | -3 | -5 | 230.43  | 5.30  |
| -6 | -3 | -5 | 237.89  | 5.05  |
| -6 | -3 | -4 | 35.64   | 2.20  |
| -6 | -3 | -4 | 30.83   | 2.15  |
| -6 | -3 | -3 | 34.18   | 2.31  |
| -6 | -3 | -3 | 30.63   | 2.19  |
| -6 | -3 | -3 | 27.13   | 2.26  |
| -6 | -3 | -3 | 32.18   | 2.20  |
| -6 | -3 | -3 | 30.58   | 2.14  |
| -6 | -3 | -2 | 82.83   | 3.38  |
| -6 | -3 | -2 | 83.78   | 3.40  |
| -6 | -3 | -2 | 75.75   | 3.17  |
| -6 | -3 | -2 | 75.08   | 3.52  |
| -6 | -3 | -2 | 80.87   | 3.41  |
| -6 | -3 | -1 | 1886.00 | 21.11 |
| -6 | -3 | -1 | 1801.36 | 20.74 |
| -6 | -3 | -1 | 1797.39 | 20.61 |
| -6 | -3 | -1 | 1752.14 | 20.74 |
| -6 | -3 | -1 | 1847.56 | 19.55 |
| -6 | -3 | -1 | 1796.08 | 19.59 |
| -6 | -3 | 0  | 5.50    | 1.13  |
| -6 | -3 | 0  | 5.75    | 1.11  |
| -6 | -3 | 0  | 8.71    | 1.56  |
| -6 | -3 | 0  | 6.67    | 1.69  |
| -6 | -3 | 0  | 7.71    | 1.31  |
| -6 | -3 | 0  | 7.38    | 1.51  |
| -6 | -3 | 1  | 135.36  | 5.39  |
| -6 | -3 | 1  | 128.64  | 4.41  |
| -6 | -3 | 1  | 136.06  | 4.06  |
| -6 | -3 | 1  | 129.10  | 4.00  |
| -6 | -3 | 1  | 132.83  | 4.18  |
| -6 | -3 | 1  | 124.63  | 5.17  |
| -6 | -3 | 1  | 126.26  | 3.83  |
| -6 | -3 | 1  | 127.88  | 4.72  |



## CIF 31

|    |    |   |        |      |
|----|----|---|--------|------|
| -6 | -3 | 1 | 127.16 | 4.70 |
| -6 | -3 | 2 | 0.79   | 0.75 |
| -6 | -3 | 2 | 0.88   | 1.34 |
| -6 | -3 | 2 | 1.31   | 1.08 |
| -6 | -3 | 2 | 0.79   | 0.79 |
| -6 | -3 | 2 | 2.28   | 1.43 |
| -6 | -3 | 2 | 1.77   | 1.12 |
| -6 | -3 | 2 | 2.75   | 1.02 |
| -6 | -3 | 2 | 1.81   | 1.08 |
| -6 | -3 | 3 | 352.91 | 6.35 |
| -6 | -3 | 3 | 341.77 | 7.79 |
| -6 | -3 | 3 | 366.02 | 8.83 |
| -6 | -3 | 3 | 336.02 | 7.71 |
| -6 | -3 | 3 | 361.75 | 7.60 |
| -6 | -3 | 3 | 349.81 | 6.72 |
| -6 | -3 | 4 | 395.38 | 8.51 |
| -6 | -3 | 4 | 414.27 | 9.30 |
| -6 | -3 | 4 | 376.72 | 6.86 |
| -6 | -3 | 4 | 412.44 | 8.45 |
| -6 | -3 | 4 | 406.39 | 8.01 |
| -6 | -3 | 4 | 412.84 | 7.19 |
| -6 | -3 | 4 | 383.70 | 7.95 |
| -6 | -3 | 4 | 387.84 | 8.14 |
| -6 | -3 | 5 | 204.01 | 5.62 |
| -6 | -3 | 5 | 188.50 | 5.65 |
| -6 | -3 | 5 | 193.60 | 4.66 |
| -6 | -3 | 5 | 191.20 | 5.76 |
| -6 | -3 | 5 | 190.40 | 4.83 |
| -6 | -3 | 5 | 198.16 | 5.44 |
| -6 | -3 | 5 | 193.85 | 4.60 |
| -6 | -3 | 5 | 199.87 | 5.76 |
| -6 | -3 | 6 | 462.90 | 9.23 |
| -6 | -3 | 6 | 453.40 | 8.50 |
| -6 | -3 | 6 | 436.14 | 8.00 |
| -6 | -3 | 6 | 436.01 | 7.83 |
| -6 | -3 | 6 | 444.63 | 9.24 |
| -6 | -3 | 6 | 461.81 | 8.81 |
| -6 | -3 | 6 | 478.60 | 9.18 |
| -6 | -3 | 7 | 188.54 | 5.15 |
| -6 | -3 | 7 | 198.44 | 5.90 |
| -6 | -3 | 7 | 197.80 | 6.03 |

## CIF 31

|    |    |    |        |      |
|----|----|----|--------|------|
| -6 | -3 | 7  | 182.54 | 5.05 |
| -6 | -3 | 7  | 215.00 | 6.55 |
| -6 | -3 | 7  | 196.56 | 6.11 |
| -6 | -3 | 7  | 197.57 | 5.98 |
| -6 | -3 | 7  | 210.95 | 6.03 |
| -6 | -3 | 7  | 202.08 | 6.12 |
| -6 | -3 | 7  | 200.15 | 5.53 |
| -6 | -3 | 8  | 261.87 | 6.21 |
| -6 | -3 | 8  | 286.08 | 7.12 |
| -6 | -3 | 8  | 242.31 | 6.33 |
| -6 | -3 | 8  | 267.02 | 6.58 |
| -6 | -3 | 8  | 279.15 | 7.66 |
| -6 | -3 | 8  | 260.43 | 7.11 |
| -6 | -3 | 8  | 250.34 | 6.65 |
| -6 | -3 | 8  | 267.26 | 6.43 |
| -6 | -3 | 8  | 259.31 | 6.97 |
| -6 | -3 | 8  | 253.42 | 7.03 |
| -6 | -3 | 8  | 253.97 | 6.85 |
| -6 | -3 | 8  | 248.88 | 6.45 |
| -6 | -3 | 8  | 278.27 | 6.33 |
| -6 | -3 | 9  | 44.87  | 3.03 |
| -6 | -3 | 9  | 51.55  | 2.84 |
| -6 | -3 | 9  | 49.42  | 3.04 |
| -6 | -3 | 9  | 47.07  | 2.83 |
| -6 | -3 | 9  | 49.76  | 3.17 |
| -6 | -3 | 9  | 49.29  | 3.08 |
| -6 | -3 | 9  | 48.30  | 2.91 |
| -6 | -3 | 9  | 46.63  | 2.98 |
| -6 | -3 | 9  | 46.91  | 2.69 |
| -6 | -3 | 9  | 46.18  | 2.73 |
| -6 | -3 | 9  | 47.68  | 3.24 |
| -6 | -3 | 9  | 50.82  | 2.89 |
| -6 | -3 | 9  | 51.13  | 2.32 |
| -6 | -3 | 10 | 25.00  | 2.06 |
| -6 | -3 | 10 | 22.35  | 2.05 |
| -6 | -3 | 10 | 24.65  | 2.04 |
| -6 | -3 | 10 | 22.91  | 2.17 |
| -6 | -3 | 10 | 22.91  | 1.96 |
| -6 | -3 | 10 | 22.62  | 2.10 |
| -6 | -3 | 10 | 25.50  | 2.07 |
| -6 | -3 | 10 | 25.50  | 2.47 |

## CIF 31

|    |    |    |        |      |
|----|----|----|--------|------|
| -6 | -3 | 10 | 26.15  | 2.38 |
| -6 | -3 | 10 | 25.06  | 2.30 |
| -6 | -3 | 11 | 3.16   | 1.08 |
| -6 | -3 | 11 | 3.25   | 1.18 |
| -6 | -3 | 11 | 3.41   | 1.05 |
| -6 | -3 | 11 | 4.39   | 1.22 |
| -6 | -3 | 11 | 2.67   | 1.05 |
| -6 | -3 | 11 | 4.31   | 1.32 |
| -6 | -3 | 11 | 4.73   | 1.23 |
| -6 | -3 | 11 | 4.51   | 1.41 |
| -6 | -3 | 11 | 3.64   | 1.05 |
| -6 | -3 | 12 | 127.27 | 4.19 |
| -6 | -3 | 12 | 126.11 | 4.22 |
| -6 | -3 | 12 | 109.99 | 4.03 |
| -6 | -3 | 12 | 110.38 | 4.24 |
| -6 | -3 | 12 | 119.15 | 4.28 |
| -6 | -3 | 12 | 112.33 | 4.01 |
| -6 | -3 | 12 | 120.66 | 3.78 |
| -6 | -3 | 12 | 111.12 | 3.92 |
| -6 | -3 | 12 | 127.99 | 4.55 |
| -6 | -3 | 12 | 123.71 | 4.49 |
| -6 | -3 | 13 | -0.20  | 0.79 |
| -6 | -3 | 13 | 0.61   | 0.94 |
| -6 | -3 | 13 | 0.26   | 0.72 |
| -6 | -3 | 13 | -0.04  | 0.84 |
| -6 | -3 | 13 | 1.24   | 0.91 |
| -6 | -3 | 13 | 0.48   | 0.98 |
| -6 | -3 | 13 | 0.65   | 0.86 |
| -6 | -3 | 14 | 1.98   | 0.82 |
| -6 | -3 | 14 | 2.15   | 0.74 |
| -6 | -3 | 14 | 1.16   | 0.71 |
| -6 | -3 | 14 | 1.09   | 0.87 |
| -6 | -3 | 14 | 1.47   | 0.83 |
| -6 | -3 | 15 | 7.33   | 0.93 |
| -6 | -3 | 15 | 7.80   | 0.91 |
| -6 | -3 | 15 | 8.17   | 0.84 |
| -6 | -2 | -8 | 2.73   | 1.36 |
| -6 | -2 | -8 | 3.17   | 0.65 |
| -6 | -2 | -7 | 0.75   | 1.03 |
| -6 | -2 | -7 | 1.11   | 0.59 |
| -6 | -2 | -7 | 0.51   | 0.73 |

## CIF 31

|    |    |    |        |      |
|----|----|----|--------|------|
| -6 | -2 | -7 | 0.93   | 0.72 |
| -6 | -2 | -6 | 51.33  | 2.41 |
| -6 | -2 | -6 | 51.57  | 2.31 |
| -6 | -2 | -6 | 54.60  | 2.56 |
| -6 | -2 | -6 | 54.98  | 2.60 |
| -6 | -2 | -5 | 187.42 | 4.96 |
| -6 | -2 | -5 | 160.37 | 5.53 |
| -6 | -2 | -5 | 190.00 | 4.87 |
| -6 | -2 | -5 | 174.01 | 4.86 |
| -6 | -2 | -5 | 173.90 | 4.62 |
| -6 | -2 | -4 | 214.05 | 5.53 |
| -6 | -2 | -4 | 228.69 | 5.56 |
| -6 | -2 | -3 | 107.62 | 3.90 |
| -6 | -2 | -3 | 103.41 | 3.86 |
| -6 | -2 | -3 | 114.13 | 4.08 |
| -6 | -2 | -2 | 258.66 | 6.11 |
| -6 | -2 | -2 | 266.05 | 6.14 |
| -6 | -2 | -2 | 259.37 | 5.43 |
| -6 | -2 | -2 | 273.37 | 6.27 |
| -6 | -2 | -1 | 228.35 | 5.56 |
| -6 | -2 | -1 | 237.45 | 5.21 |
| -6 | -2 | -1 | 231.00 | 5.68 |
| -6 | -2 | -1 | 239.23 | 5.68 |
| -6 | -2 | -1 | 238.68 | 5.06 |
| -6 | -2 | 0  | 74.92  | 3.93 |
| -6 | -2 | 0  | 65.52  | 2.88 |
| -6 | -2 | 0  | 72.05  | 2.97 |
| -6 | -2 | 0  | 65.53  | 2.86 |
| -6 | -2 | 0  | 69.40  | 3.25 |
| -6 | -2 | 0  | 70.86  | 3.71 |
| -6 | -2 | 0  | 64.37  | 2.82 |
| -6 | -2 | 0  | 71.99  | 3.35 |
| -6 | -2 | 1  | 211.24 | 5.37 |
| -6 | -2 | 1  | 241.79 | 6.39 |
| -6 | -2 | 1  | 217.28 | 6.48 |
| -6 | -2 | 1  | 241.70 | 5.47 |
| -6 | -2 | 1  | 222.60 | 6.70 |
| -6 | -2 | 1  | 218.81 | 5.83 |
| -6 | -2 | 1  | 241.58 | 5.28 |
| -6 | -2 | 1  | 246.77 | 5.35 |
| -6 | -2 | 1  | 236.49 | 5.36 |

## CIF 31

|    |    |   |        |      |
|----|----|---|--------|------|
| -6 | -2 | 1 | 222.25 | 5.88 |
| -6 | -2 | 2 | 59.77  | 2.45 |
| -6 | -2 | 2 | 66.24  | 2.90 |
| -6 | -2 | 2 | 66.34  | 3.09 |
| -6 | -2 | 2 | 61.46  | 2.92 |
| -6 | -2 | 2 | 59.88  | 2.39 |
| -6 | -2 | 2 | 57.49  | 2.55 |
| -6 | -2 | 2 | 65.69  | 3.32 |
| -6 | -2 | 2 | 72.17  | 3.76 |
| -6 | -2 | 2 | 72.03  | 3.63 |
| -6 | -2 | 3 | 7.20   | 1.56 |
| -6 | -2 | 3 | 7.00   | 1.17 |
| -6 | -2 | 3 | 5.97   | 1.39 |
| -6 | -2 | 3 | 9.09   | 1.49 |
| -6 | -2 | 3 | 6.74   | 1.24 |
| -6 | -2 | 3 | 4.48   | 0.83 |
| -6 | -2 | 3 | 5.84   | 1.16 |
| -6 | -2 | 3 | 6.16   | 1.20 |
| -6 | -2 | 3 | 6.86   | 1.27 |
| -6 | -2 | 3 | 3.42   | 0.87 |
| -6 | -2 | 3 | 4.46   | 0.88 |
| -6 | -2 | 4 | 374.23 | 6.86 |
| -6 | -2 | 4 | 344.91 | 6.27 |
| -6 | -2 | 4 | 387.53 | 7.54 |
| -6 | -2 | 4 | 377.96 | 6.76 |
| -6 | -2 | 4 | 360.26 | 7.63 |
| -6 | -2 | 4 | 378.62 | 8.32 |
| -6 | -2 | 4 | 370.91 | 7.70 |
| -6 | -2 | 4 | 396.23 | 8.54 |
| -6 | -2 | 4 | 402.83 | 8.75 |
| -6 | -2 | 4 | 376.63 | 7.65 |
| -6 | -2 | 4 | 374.92 | 8.59 |
| -6 | -2 | 4 | 402.84 | 7.51 |
| -6 | -2 | 5 | 25.55  | 2.02 |
| -6 | -2 | 5 | 24.19  | 1.76 |
| -6 | -2 | 5 | 24.82  | 1.98 |
| -6 | -2 | 5 | 24.91  | 2.21 |
| -6 | -2 | 5 | 29.30  | 2.43 |
| -6 | -2 | 5 | 28.83  | 2.14 |
| -6 | -2 | 5 | 22.90  | 2.23 |
| -6 | -2 | 5 | 24.22  | 1.81 |

## CIF 31

|    |    |   |        |       |
|----|----|---|--------|-------|
| -6 | -2 | 5 | 22.79  | 1.71  |
| -6 | -2 | 5 | 23.82  | 2.13  |
| -6 | -2 | 5 | 27.16  | 2.17  |
| -6 | -2 | 5 | 20.79  | 1.42  |
| -6 | -2 | 6 | 293.87 | 7.12  |
| -6 | -2 | 6 | 314.63 | 7.29  |
| -6 | -2 | 6 | 314.97 | 6.53  |
| -6 | -2 | 6 | 280.58 | 6.44  |
| -6 | -2 | 6 | 314.35 | 7.68  |
| -6 | -2 | 6 | 326.69 | 7.55  |
| -6 | -2 | 6 | 330.83 | 7.35  |
| -6 | -2 | 6 | 323.87 | 7.13  |
| -6 | -2 | 6 | 298.07 | 6.96  |
| -6 | -2 | 6 | 308.83 | 6.20  |
| -6 | -2 | 6 | 294.70 | 6.47  |
| -6 | -2 | 6 | 310.24 | 6.47  |
| -6 | -2 | 7 | 523.84 | 9.59  |
| -6 | -2 | 7 | 532.89 | 9.75  |
| -6 | -2 | 7 | 544.02 | 9.24  |
| -6 | -2 | 7 | 501.15 | 9.84  |
| -6 | -2 | 7 | 537.40 | 9.98  |
| -6 | -2 | 7 | 610.97 | 10.52 |
| -6 | -2 | 7 | 548.83 | 9.37  |
| -6 | -2 | 7 | 524.94 | 10.01 |
| -6 | -2 | 7 | 534.01 | 9.20  |
| -6 | -2 | 7 | 514.87 | 9.34  |
| -6 | -2 | 7 | 555.18 | 10.07 |
| -6 | -2 | 7 | 525.33 | 10.29 |
| -6 | -2 | 7 | 504.69 | 10.04 |
| -6 | -2 | 7 | 563.89 | 9.93  |
| -6 | -2 | 8 | 633.47 | 10.88 |
| -6 | -2 | 8 | 634.41 | 11.50 |
| -6 | -2 | 8 | 677.40 | 9.54  |
| -6 | -2 | 8 | 614.83 | 11.40 |
| -6 | -2 | 8 | 684.80 | 11.81 |
| -6 | -2 | 8 | 672.41 | 10.56 |
| -6 | -2 | 8 | 696.08 | 10.97 |
| -6 | -2 | 8 | 685.41 | 11.66 |
| -6 | -2 | 8 | 703.88 | 11.70 |
| -6 | -2 | 8 | 696.08 | 9.78  |
| -6 | -2 | 8 | 706.58 | 11.20 |

## CIF 31

|    |    |    |         |       |
|----|----|----|---------|-------|
| -6 | -2 | 8  | 661.76  | 11.82 |
| -6 | -2 | 8  | 650.03  | 11.58 |
| -6 | -2 | 8  | 733.58  | 11.36 |
| -6 | -2 | 8  | 630.04  | 10.73 |
| -6 | -2 | 8  | 650.65  | 10.70 |
| -6 | -2 | 9  | 989.33  | 15.61 |
| -6 | -2 | 9  | 1136.46 | 15.21 |
| -6 | -2 | 9  | 1088.98 | 14.93 |
| -6 | -2 | 9  | 1076.04 | 14.94 |
| -6 | -2 | 9  | 1118.37 | 15.97 |
| -6 | -2 | 9  | 970.96  | 14.85 |
| -6 | -2 | 9  | 1099.71 | 16.05 |
| -6 | -2 | 9  | 1075.78 | 15.68 |
| -6 | -2 | 9  | 1066.76 | 15.71 |
| -6 | -2 | 9  | 1052.43 | 12.80 |
| -6 | -2 | 9  | 1087.44 | 15.17 |
| -6 | -2 | 9  | 1040.69 | 14.61 |
| -6 | -2 | 9  | 1043.47 | 13.44 |
| -6 | -2 | 9  | 1069.06 | 14.56 |
| -6 | -2 | 9  | 1049.83 | 15.83 |
| -6 | -2 | 10 | 188.41  | 5.93  |
| -6 | -2 | 10 | 214.31  | 5.83  |
| -6 | -2 | 10 | 192.63  | 6.22  |
| -6 | -2 | 10 | 191.31  | 6.09  |
| -6 | -2 | 10 | 195.79  | 6.02  |
| -6 | -2 | 10 | 196.83  | 5.99  |
| -6 | -2 | 10 | 189.43  | 5.31  |
| -6 | -2 | 10 | 185.20  | 5.90  |
| -6 | -2 | 10 | 203.00  | 5.06  |
| -6 | -2 | 10 | 197.75  | 6.04  |
| -6 | -2 | 10 | 198.34  | 5.55  |
| -6 | -2 | 10 | 203.31  | 5.70  |
| -6 | -2 | 10 | 196.47  | 5.74  |
| -6 | -2 | 10 | 207.12  | 5.77  |
| -6 | -2 | 11 | 107.69  | 4.14  |
| -6 | -2 | 11 | 106.45  | 4.42  |
| -6 | -2 | 11 | 114.51  | 4.68  |
| -6 | -2 | 11 | 110.73  | 4.23  |
| -6 | -2 | 11 | 103.16  | 4.21  |
| -6 | -2 | 11 | 106.46  | 3.99  |
| -6 | -2 | 11 | 105.34  | 4.30  |

## CIF 31

|    |    |    |        |      |
|----|----|----|--------|------|
| -6 | -2 | 11 | 91.88  | 3.54 |
| -6 | -2 | 11 | 97.85  | 4.12 |
| -6 | -2 | 11 | 98.42  | 4.25 |
| -6 | -2 | 11 | 103.01 | 3.59 |
| -6 | -2 | 11 | 104.80 | 4.09 |
| -6 | -2 | 12 | 417.15 | 8.46 |
| -6 | -2 | 12 | 442.83 | 8.54 |
| -6 | -2 | 12 | 398.55 | 8.59 |
| -6 | -2 | 12 | 438.16 | 8.42 |
| -6 | -2 | 12 | 451.90 | 7.89 |
| -6 | -2 | 12 | 441.13 | 8.71 |
| -6 | -2 | 12 | 466.04 | 9.23 |
| -6 | -2 | 12 | 443.02 | 8.38 |
| -6 | -2 | 12 | 413.43 | 8.84 |
| -6 | -2 | 12 | 443.05 | 8.92 |
| -6 | -2 | 12 | 435.70 | 8.57 |
| -6 | -2 | 13 | 20.33  | 1.70 |
| -6 | -2 | 13 | 16.69  | 1.41 |
| -6 | -2 | 13 | 18.96  | 1.73 |
| -6 | -2 | 13 | 16.48  | 1.59 |
| -6 | -2 | 13 | 18.97  | 1.67 |
| -6 | -2 | 13 | 20.62  | 1.97 |
| -6 | -2 | 13 | 19.27  | 1.75 |
| -6 | -2 | 13 | 17.71  | 1.79 |
| -6 | -2 | 13 | 20.43  | 1.91 |
| -6 | -2 | 14 | 308.22 | 5.87 |
| -6 | -2 | 14 | 307.03 | 5.93 |
| -6 | -2 | 14 | 320.32 | 6.53 |
| -6 | -2 | 14 | 316.73 | 6.20 |
| -6 | -2 | 14 | 315.12 | 5.98 |
| -6 | -2 | 14 | 321.99 | 6.46 |
| -6 | -2 | 15 | 51.41  | 2.15 |
| -6 | -2 | 15 | 56.21  | 2.11 |
| -6 | -2 | 15 | 54.54  | 1.99 |
| -6 | -1 | -9 | 70.70  | 3.21 |
| -6 | -1 | -9 | 89.59  | 2.16 |
| -6 | -1 | -8 | 1.94   | 0.67 |
| -6 | -1 | -8 | 2.46   | 1.16 |
| -6 | -1 | -8 | 2.77   | 0.84 |
| -6 | -1 | -7 | 61.06  | 2.67 |
| -6 | -1 | -7 | 61.04  | 2.44 |



## CIF 31

|    |    |    |        |       |
|----|----|----|--------|-------|
| -6 | -1 | -7 | 55.10  | 3.23  |
| -6 | -1 | -7 | 60.62  | 2.51  |
| -6 | -1 | -7 | 61.58  | 3.44  |
| -6 | -1 | -6 | 38.40  | 2.26  |
| -6 | -1 | -6 | 38.21  | 2.32  |
| -6 | -1 | -6 | 40.99  | 5.27  |
| -6 | -1 | -6 | 34.73  | 2.16  |
| -6 | -1 | -6 | 30.01  | 2.74  |
| -6 | -1 | -6 | 39.07  | 2.16  |
| -6 | -1 | -6 | 35.78  | 2.32  |
| -6 | -1 | -5 | 69.79  | 8.62  |
| -6 | -1 | -5 | 80.43  | 3.29  |
| -6 | -1 | -5 | 76.45  | 4.28  |
| -6 | -1 | -5 | 87.49  | 3.49  |
| -6 | -1 | -5 | 80.71  | 3.05  |
| -6 | -1 | -5 | 82.29  | 3.32  |
| -6 | -1 | -5 | 73.69  | 4.15  |
| -6 | -1 | -5 | 77.14  | 4.90  |
| -6 | -1 | -5 | 78.58  | 3.40  |
| -6 | -1 | -5 | 82.77  | 3.25  |
| -6 | -1 | -5 | 79.88  | 3.28  |
| -6 | -1 | -4 | 180.26 | 4.83  |
| -6 | -1 | -4 | 177.33 | 5.00  |
| -6 | -1 | -4 | 174.26 | 4.98  |
| -6 | -1 | -4 | 186.54 | 5.36  |
| -6 | -1 | -4 | 189.39 | 5.21  |
| -6 | -1 | -4 | 171.35 | 6.20  |
| -6 | -1 | -4 | 166.06 | 4.22  |
| -6 | -1 | -4 | 190.56 | 5.13  |
| -6 | -1 | -4 | 169.54 | 4.48  |
| -6 | -1 | -4 | 159.91 | 9.12  |
| -6 | -1 | -3 | 333.13 | 6.74  |
| -6 | -1 | -3 | 350.19 | 7.07  |
| -6 | -1 | -3 | 335.70 | 6.38  |
| -6 | -1 | -3 | 348.49 | 7.22  |
| -6 | -1 | -3 | 334.14 | 8.51  |
| -6 | -1 | -3 | 313.22 | 10.55 |
| -6 | -1 | -3 | 340.47 | 7.11  |
| -6 | -1 | -3 | 343.68 | 6.81  |
| -6 | -1 | -3 | 330.26 | 6.62  |
| -6 | -1 | -2 | 13.57  | 1.39  |

## CIF 31

|    |    |    |        |       |
|----|----|----|--------|-------|
| -6 | -1 | -2 | 19.82  | 2.21  |
| -6 | -1 | -2 | 12.11  | 1.48  |
| -6 | -1 | -2 | 13.58  | 1.41  |
| -6 | -1 | -2 | 15.56  | 1.63  |
| -6 | -1 | -2 | 11.90  | 1.50  |
| -6 | -1 | -2 | 12.87  | 1.41  |
| -6 | -1 | -2 | 12.11  | 1.16  |
| -6 | -1 | -2 | 17.23  | 1.70  |
| -6 | -1 | -2 | 19.66  | 5.32  |
| -6 | -1 | -2 | 13.98  | 1.57  |
| -6 | -1 | -1 | 10.04  | 1.32  |
| -6 | -1 | -1 | 11.91  | 1.40  |
| -6 | -1 | -1 | 11.03  | 1.19  |
| -6 | -1 | -1 | 12.12  | 1.80  |
| -6 | -1 | -1 | 9.66   | 1.56  |
| -6 | -1 | -1 | 8.74   | 1.28  |
| -6 | -1 | -1 | 10.81  | 1.65  |
| -6 | -1 | -1 | 12.22  | 1.58  |
| -6 | -1 | -1 | 9.17   | 1.33  |
| -6 | -1 | -1 | 9.39   | 1.18  |
| -6 | -1 | 0  | 3.26   | 0.97  |
| -6 | -1 | 0  | 2.64   | 0.80  |
| -6 | -1 | 0  | 3.70   | 1.28  |
| -6 | -1 | 0  | 2.52   | 0.87  |
| -6 | -1 | 0  | 2.45   | 1.11  |
| -6 | -1 | 0  | 5.10   | 0.92  |
| -6 | -1 | 0  | 7.01   | 1.32  |
| -6 | -1 | 0  | 5.66   | 1.03  |
| -6 | -1 | 0  | 2.28   | 1.10  |
| -6 | -1 | 0  | 2.72   | 0.90  |
| -6 | -1 | 0  | 2.61   | 0.81  |
| -6 | -1 | 1  | 811.80 | 10.88 |
| -6 | -1 | 1  | 827.28 | 13.49 |
| -6 | -1 | 1  | 824.06 | 11.64 |
| -6 | -1 | 1  | 833.84 | 11.20 |
| -6 | -1 | 1  | 879.56 | 12.01 |
| -6 | -1 | 1  | 825.71 | 11.27 |
| -6 | -1 | 1  | 855.72 | 11.96 |
| -6 | -1 | 1  | 879.38 | 13.26 |
| -6 | -1 | 1  | 907.98 | 13.16 |
| -6 | -1 | 2  | 441.91 | 9.29  |

## CIF 31

|    |    |   |        |       |
|----|----|---|--------|-------|
| -6 | -1 | 2 | 476.06 | 8.19  |
| -6 | -1 | 2 | 495.54 | 9.27  |
| -6 | -1 | 2 | 484.75 | 7.55  |
| -6 | -1 | 2 | 475.01 | 7.17  |
| -6 | -1 | 2 | 485.66 | 8.20  |
| -6 | -1 | 2 | 514.27 | 9.37  |
| -6 | -1 | 2 | 420.24 | 9.10  |
| -6 | -1 | 2 | 489.01 | 8.95  |
| -6 | -1 | 2 | 505.32 | 7.75  |
| -6 | -1 | 3 | 200.50 | 4.61  |
| -6 | -1 | 3 | 234.00 | 6.27  |
| -6 | -1 | 3 | 221.18 | 5.91  |
| -6 | -1 | 3 | 208.00 | 5.12  |
| -6 | -1 | 3 | 206.69 | 4.97  |
| -6 | -1 | 3 | 196.46 | 4.64  |
| -6 | -1 | 3 | 205.86 | 5.66  |
| -6 | -1 | 3 | 198.73 | 4.34  |
| -6 | -1 | 3 | 205.96 | 5.56  |
| -6 | -1 | 3 | 211.06 | 5.07  |
| -6 | -1 | 3 | 196.47 | 5.11  |
| -6 | -1 | 4 | 10.86  | 1.54  |
| -6 | -1 | 4 | 14.85  | 1.38  |
| -6 | -1 | 4 | 16.05  | 1.40  |
| -6 | -1 | 4 | 9.67   | 1.51  |
| -6 | -1 | 4 | 8.54   | 1.28  |
| -6 | -1 | 4 | 11.05  | 1.36  |
| -6 | -1 | 4 | 15.78  | 1.75  |
| -6 | -1 | 4 | 12.23  | 1.34  |
| -6 | -1 | 4 | 9.22   | 1.60  |
| -6 | -1 | 4 | 13.86  | 1.13  |
| -6 | -1 | 4 | 11.43  | 1.37  |
| -6 | -1 | 5 | 642.76 | 10.74 |
| -6 | -1 | 5 | 630.14 | 8.41  |
| -6 | -1 | 5 | 628.33 | 10.22 |
| -6 | -1 | 5 | 636.31 | 9.21  |
| -6 | -1 | 5 | 679.55 | 11.10 |
| -6 | -1 | 5 | 669.59 | 11.44 |
| -6 | -1 | 5 | 623.63 | 11.20 |
| -6 | -1 | 5 | 650.09 | 10.70 |
| -6 | -1 | 5 | 660.75 | 11.12 |
| -6 | -1 | 5 | 653.89 | 9.85  |

## CIF 31

|    |    |   |        |       |
|----|----|---|--------|-------|
| -6 | -1 | 5 | 662.36 | 10.09 |
| -6 | -1 | 5 | 636.74 | 10.30 |
| -6 | -1 | 5 | 646.03 | 9.75  |
| -6 | -1 | 5 | 649.89 | 10.22 |
| -6 | -1 | 5 | 627.74 | 9.50  |
| -6 | -1 | 6 | 44.99  | 2.82  |
| -6 | -1 | 6 | 41.19  | 2.05  |
| -6 | -1 | 6 | 39.91  | 2.12  |
| -6 | -1 | 6 | 37.79  | 2.18  |
| -6 | -1 | 6 | 44.96  | 2.62  |
| -6 | -1 | 6 | 39.08  | 1.89  |
| -6 | -1 | 6 | 43.50  | 2.58  |
| -6 | -1 | 6 | 46.97  | 2.80  |
| -6 | -1 | 6 | 33.34  | 2.49  |
| -6 | -1 | 6 | 39.87  | 2.56  |
| -6 | -1 | 6 | 38.43  | 2.31  |
| -6 | -1 | 6 | 38.15  | 2.26  |
| -6 | -1 | 6 | 46.52  | 2.63  |
| -6 | -1 | 6 | 48.07  | 2.94  |
| -6 | -1 | 6 | 43.37  | 2.48  |
| -6 | -1 | 6 | 36.86  | 2.27  |
| -6 | -1 | 7 | 882.53 | 12.07 |
| -6 | -1 | 7 | 941.28 | 13.34 |
| -6 | -1 | 7 | 858.92 | 13.78 |
| -6 | -1 | 7 | 928.13 | 13.48 |
| -6 | -1 | 7 | 864.96 | 13.18 |
| -6 | -1 | 7 | 852.13 | 12.34 |
| -6 | -1 | 7 | 885.99 | 12.58 |
| -6 | -1 | 7 | 849.65 | 12.23 |
| -6 | -1 | 7 | 835.50 | 11.22 |
| -6 | -1 | 7 | 864.01 | 11.68 |
| -6 | -1 | 7 | 900.06 | 13.30 |
| -6 | -1 | 7 | 893.81 | 13.06 |
| -6 | -1 | 7 | 924.33 | 13.86 |
| -6 | -1 | 7 | 805.56 | 11.07 |
| -6 | -1 | 7 | 825.41 | 12.23 |
| -6 | -1 | 7 | 881.47 | 13.15 |
| -6 | -1 | 7 | 892.00 | 12.96 |
| -6 | -1 | 8 | 20.33  | 1.79  |
| -6 | -1 | 8 | 22.49  | 1.94  |
| -6 | -1 | 8 | 27.16  | 2.12  |

## CIF 31

|    |    |    |        |       |
|----|----|----|--------|-------|
| -6 | -1 | 8  | 19.64  | 2.15  |
| -6 | -1 | 8  | 19.02  | 1.92  |
| -6 | -1 | 8  | 19.82  | 1.96  |
| -6 | -1 | 8  | 20.36  | 1.90  |
| -6 | -1 | 8  | 23.49  | 1.91  |
| -6 | -1 | 8  | 20.61  | 1.71  |
| -6 | -1 | 8  | 20.08  | 2.01  |
| -6 | -1 | 8  | 19.38  | 1.47  |
| -6 | -1 | 8  | 22.84  | 2.07  |
| -6 | -1 | 8  | 19.11  | 2.01  |
| -6 | -1 | 8  | 22.04  | 1.92  |
| -6 | -1 | 8  | 20.68  | 1.90  |
| -6 | -1 | 8  | 19.28  | 1.88  |
| -6 | -1 | 8  | 22.94  | 1.69  |
| -6 | -1 | 8  | 25.75  | 2.28  |
| -6 | -1 | 8  | 21.43  | 2.15  |
| -6 | -1 | 9  | 755.48 | 12.36 |
| -6 | -1 | 9  | 804.63 | 12.16 |
| -6 | -1 | 9  | 761.51 | 11.58 |
| -6 | -1 | 9  | 743.32 | 11.75 |
| -6 | -1 | 9  | 753.66 | 12.71 |
| -6 | -1 | 9  | 724.81 | 12.33 |
| -6 | -1 | 9  | 617.16 | 11.06 |
| -6 | -1 | 9  | 729.03 | 12.64 |
| -6 | -1 | 9  | 745.55 | 11.33 |
| -6 | -1 | 9  | 731.85 | 12.48 |
| -6 | -1 | 9  | 753.11 | 12.83 |
| -6 | -1 | 9  | 772.80 | 11.18 |
| -6 | -1 | 9  | 720.55 | 12.03 |
| -6 | -1 | 9  | 785.93 | 12.61 |
| -6 | -1 | 9  | 823.89 | 13.19 |
| -6 | -1 | 9  | 721.37 | 11.57 |
| -6 | -1 | 9  | 720.24 | 11.20 |
| -6 | -1 | 10 | 370.29 | 7.65  |
| -6 | -1 | 10 | 355.26 | 7.86  |
| -6 | -1 | 10 | 375.81 | 7.42  |
| -6 | -1 | 10 | 365.28 | 8.01  |
| -6 | -1 | 10 | 366.50 | 8.52  |
| -6 | -1 | 10 | 368.18 | 8.03  |
| -6 | -1 | 10 | 424.47 | 8.97  |
| -6 | -1 | 10 | 391.46 | 8.41  |

## CIF 31

|    |    |    |        |      |
|----|----|----|--------|------|
| -6 | -1 | 10 | 334.15 | 8.13 |
| -6 | -1 | 10 | 391.01 | 8.83 |
| -6 | -1 | 10 | 358.55 | 7.73 |
| -6 | -1 | 10 | 369.13 | 8.54 |
| -6 | -1 | 10 | 380.92 | 8.48 |
| -6 | -1 | 10 | 384.78 | 8.74 |
| -6 | -1 | 10 | 371.95 | 7.39 |
| -6 | -1 | 11 | 73.80  | 3.72 |
| -6 | -1 | 11 | 75.39  | 3.21 |
| -6 | -1 | 11 | 71.52  | 3.39 |
| -6 | -1 | 11 | 74.57  | 3.67 |
| -6 | -1 | 11 | 67.74  | 3.23 |
| -6 | -1 | 11 | 75.19  | 3.54 |
| -6 | -1 | 11 | 66.41  | 3.18 |
| -6 | -1 | 11 | 72.88  | 3.79 |
| -6 | -1 | 11 | 71.35  | 3.77 |
| -6 | -1 | 11 | 69.03  | 3.59 |
| -6 | -1 | 11 | 66.31  | 3.49 |
| -6 | -1 | 11 | 66.18  | 3.50 |
| -6 | -1 | 11 | 66.93  | 3.56 |
| -6 | -1 | 12 | 76.08  | 3.62 |
| -6 | -1 | 12 | 80.54  | 3.43 |
| -6 | -1 | 12 | 81.24  | 3.74 |
| -6 | -1 | 12 | 81.59  | 3.48 |
| -6 | -1 | 12 | 83.07  | 3.92 |
| -6 | -1 | 12 | 74.78  | 3.37 |
| -6 | -1 | 12 | 89.39  | 3.45 |
| -6 | -1 | 12 | 80.09  | 3.50 |
| -6 | -1 | 12 | 77.36  | 3.52 |
| -6 | -1 | 12 | 75.98  | 3.69 |
| -6 | -1 | 12 | 78.91  | 3.71 |
| -6 | -1 | 12 | 83.24  | 3.87 |
| -6 | -1 | 12 | 72.26  | 3.56 |
| -6 | -1 | 13 | 50.07  | 2.73 |
| -6 | -1 | 13 | 50.09  | 2.72 |
| -6 | -1 | 13 | 46.90  | 2.74 |
| -6 | -1 | 13 | 47.52  | 2.51 |
| -6 | -1 | 13 | 46.41  | 2.54 |
| -6 | -1 | 13 | 48.74  | 2.59 |
| -6 | -1 | 13 | 47.02  | 2.78 |
| -6 | -1 | 13 | 44.42  | 2.63 |

## CIF 31

|    |    |    |        |      |
|----|----|----|--------|------|
| -6 | -1 | 13 | 45.23  | 2.73 |
| -6 | -1 | 13 | 47.59  | 2.50 |
| -6 | -1 | 13 | 48.46  | 2.46 |
| -6 | -1 | 14 | 20.92  | 1.56 |
| -6 | -1 | 14 | 19.39  | 1.61 |
| -6 | -1 | 14 | 22.97  | 1.84 |
| -6 | -1 | 14 | 19.45  | 1.64 |
| -6 | -1 | 14 | 23.21  | 1.82 |
| -6 | -1 | 14 | 22.78  | 1.65 |
| -6 | -1 | 14 | 19.33  | 1.69 |
| -6 | -1 | 15 | 37.48  | 1.78 |
| -6 | -1 | 15 | 38.92  | 1.89 |
| -6 | -1 | 15 | 36.90  | 1.63 |
| -6 | -1 | 15 | 33.94  | 1.75 |
| -6 | 0  | -9 | 10.59  | 1.05 |
| -6 | 0  | -9 | 7.84   | 1.80 |
| -6 | 0  | -8 | 4.68   | 0.85 |
| -6 | 0  | -8 | 5.76   | 2.78 |
| -6 | 0  | -8 | 4.54   | 3.05 |
| -6 | 0  | -8 | 3.12   | 4.56 |
| -6 | 0  | -8 | 4.19   | 1.02 |
| -6 | 0  | -8 | 3.12   | 0.82 |
| -6 | 0  | -8 | 2.59   | 1.30 |
| -6 | 0  | -7 | 212.69 | 4.79 |
| -6 | 0  | -7 | 217.45 | 5.15 |
| -6 | 0  | -7 | 209.92 | 6.21 |
| -6 | 0  | -7 | 188.77 | 6.28 |
| -6 | 0  | -7 | 208.53 | 4.99 |
| -6 | 0  | -7 | 209.08 | 5.61 |
| -6 | 0  | -7 | 212.89 | 5.19 |
| -6 | 0  | -7 | 209.32 | 4.95 |
| -6 | 0  | -7 | 212.43 | 5.37 |
| -6 | 0  | -6 | 39.59  | 2.35 |
| -6 | 0  | -6 | 34.74  | 8.21 |
| -6 | 0  | -6 | 35.71  | 3.11 |
| -6 | 0  | -6 | 37.44  | 2.86 |
| -6 | 0  | -6 | 38.72  | 2.31 |
| -6 | 0  | -6 | 36.48  | 2.24 |
| -6 | 0  | -6 | 38.18  | 2.43 |
| -6 | 0  | -6 | 40.65  | 3.18 |
| -6 | 0  | -6 | 40.32  | 2.38 |

## CIF 31

|    |   |    |         |       |
|----|---|----|---------|-------|
| -6 | 0 | -6 | 38.20   | 2.46  |
| -6 | 0 | -6 | 40.54   | 2.28  |
| -6 | 0 | -5 | 134.36  | 9.31  |
| -6 | 0 | -5 | 145.49  | 4.39  |
| -6 | 0 | -5 | 147.91  | 4.58  |
| -6 | 0 | -5 | 148.96  | 4.40  |
| -6 | 0 | -5 | 140.90  | 4.36  |
| -6 | 0 | -5 | 147.30  | 4.46  |
| -6 | 0 | -5 | 139.90  | 4.44  |
| -6 | 0 | -5 | 146.64  | 4.57  |
| -6 | 0 | -5 | 133.69  | 3.83  |
| -6 | 0 | -4 | 161.60  | 4.92  |
| -6 | 0 | -4 | 178.00  | 4.84  |
| -6 | 0 | -4 | 177.78  | 5.07  |
| -6 | 0 | -4 | 204.90  | 5.21  |
| -6 | 0 | -4 | 180.84  | 4.62  |
| -6 | 0 | -4 | 175.67  | 9.13  |
| -6 | 0 | -4 | 184.35  | 4.74  |
| -6 | 0 | -4 | 189.40  | 6.50  |
| -6 | 0 | -4 | 199.31  | 5.20  |
| -6 | 0 | -4 | 187.39  | 4.79  |
| -6 | 0 | -4 | 187.62  | 5.11  |
| -6 | 0 | -4 | 202.17  | 5.39  |
| -6 | 0 | -3 | 2892.25 | 29.19 |
| -6 | 0 | -3 | 2806.45 | 28.42 |
| -6 | 0 | -3 | 2728.33 | 31.92 |
| -6 | 0 | -3 | 2732.70 | 28.86 |
| -6 | 0 | -3 | 2811.39 | 29.31 |
| -6 | 0 | -3 | 2793.26 | 27.87 |
| -6 | 0 | -3 | 2981.90 | 29.09 |
| -6 | 0 | -3 | 2706.22 | 32.11 |
| -6 | 0 | -3 | 2696.75 | 28.79 |
| -6 | 0 | -3 | 2951.99 | 29.12 |
| -6 | 0 | -3 | 2947.55 | 29.48 |
| -6 | 0 | -2 | 6.68    | 1.57  |
| -6 | 0 | -2 | 3.17    | 1.05  |
| -6 | 0 | -2 | 1.72    | 0.68  |
| -6 | 0 | -2 | 1.42    | 0.92  |
| -6 | 0 | -2 | 2.04    | 0.95  |
| -6 | 0 | -2 | 2.26    | 0.82  |
| -6 | 0 | -2 | 1.77    | 0.89  |



## CIF 31

|    |   |    |         |       |
|----|---|----|---------|-------|
| -6 | 0 | -2 | 2.70    | 1.00  |
| -6 | 0 | -2 | 2.09    | 0.84  |
| -6 | 0 | -2 | 5.75    | 5.28  |
| -6 | 0 | -1 | 1284.39 | 17.30 |
| -6 | 0 | -1 | 1304.87 | 14.68 |
| -6 | 0 | -1 | 1336.30 | 15.69 |
| -6 | 0 | -1 | 1370.39 | 15.69 |
| -6 | 0 | -1 | 1264.90 | 16.50 |
| -6 | 0 | -1 | 1233.10 | 17.30 |
| -6 | 0 | -1 | 1240.28 | 17.31 |
| -6 | 0 | -1 | 1325.54 | 15.55 |
| -6 | 0 | -1 | 1293.06 | 15.38 |
| -6 | 0 | -1 | 1294.94 | 15.36 |
| -6 | 0 | -1 | 1267.50 | 16.50 |
| -6 | 0 | 0  | 8.29    | 1.11  |
| -6 | 0 | 0  | 5.69    | 1.34  |
| -6 | 0 | 0  | 4.85    | 0.86  |
| -6 | 0 | 0  | 4.84    | 0.92  |
| -6 | 0 | 0  | 5.16    | 1.17  |
| -6 | 0 | 0  | 3.98    | 1.09  |
| -6 | 0 | 0  | 4.37    | 1.25  |
| -6 | 0 | 0  | 7.84    | 2.61  |
| -6 | 0 | 0  | 4.20    | 0.84  |
| -6 | 0 | 0  | 3.76    | 0.87  |
| -6 | 0 | 0  | 5.64    | 1.30  |
| -6 | 0 | 1  | 88.11   | 2.90  |
| -6 | 0 | 1  | 88.37   | 2.74  |
| -6 | 0 | 1  | 77.43   | 3.27  |
| -6 | 0 | 1  | 66.23   | 3.35  |
| -6 | 0 | 1  | 93.32   | 2.95  |
| -6 | 0 | 1  | 65.93   | 3.42  |
| -6 | 0 | 1  | 67.86   | 3.40  |
| -6 | 0 | 1  | 94.71   | 2.94  |
| -6 | 0 | 1  | 76.78   | 3.16  |
| -6 | 0 | 1  | 78.78   | 2.78  |
| -6 | 0 | 1  | 90.76   | 3.60  |
| -6 | 0 | 2  | 821.60  | 11.73 |
| -6 | 0 | 2  | 763.46  | 12.05 |
| -6 | 0 | 2  | 733.00  | 10.05 |
| -6 | 0 | 2  | 753.72  | 10.18 |
| -6 | 0 | 2  | 782.19  | 13.15 |

## CIF 31

|    |   |   |        |       |
|----|---|---|--------|-------|
| -6 | 0 | 2 | 723.07 | 8.90  |
| -6 | 0 | 2 | 757.18 | 9.98  |
| -6 | 0 | 2 | 689.38 | 9.39  |
| -6 | 0 | 2 | 711.21 | 9.89  |
| -6 | 0 | 2 | 761.95 | 11.14 |
| -6 | 0 | 2 | 789.40 | 11.89 |
| -6 | 0 | 3 | 48.33  | 3.15  |
| -6 | 0 | 3 | 65.79  | 2.62  |
| -6 | 0 | 3 | 51.98  | 2.34  |
| -6 | 0 | 3 | 53.05  | 2.38  |
| -6 | 0 | 3 | 60.94  | 2.49  |
| -6 | 0 | 3 | 56.50  | 2.71  |
| -6 | 0 | 3 | 49.43  | 2.92  |
| -6 | 0 | 3 | 52.51  | 2.88  |
| -6 | 0 | 3 | 54.79  | 2.35  |
| -6 | 0 | 3 | 57.08  | 2.34  |
| -6 | 0 | 3 | 61.69  | 2.10  |
| -6 | 0 | 4 | 3.50   | 1.13  |
| -6 | 0 | 4 | 0.79   | 1.14  |
| -6 | 0 | 4 | 0.69   | 0.66  |
| -6 | 0 | 4 | 1.56   | 0.91  |
| -6 | 0 | 4 | 0.42   | 0.61  |
| -6 | 0 | 4 | 2.09   | 1.00  |
| -6 | 0 | 4 | 0.46   | 0.77  |
| -6 | 0 | 4 | 0.13   | 0.51  |
| -6 | 0 | 4 | 0.97   | 0.91  |
| -6 | 0 | 4 | 0.45   | 0.60  |
| -6 | 0 | 4 | 0.26   | 0.63  |
| -6 | 0 | 4 | 0.26   | 0.75  |
| -6 | 0 | 4 | 0.27   | 0.78  |
| -6 | 0 | 4 | -0.12  | 0.86  |
| -6 | 0 | 4 | 0.90   | 0.89  |
| -6 | 0 | 4 | 1.42   | 0.88  |
| -6 | 0 | 4 | 0.22   | 0.69  |
| -6 | 0 | 5 | 23.34  | 1.86  |
| -6 | 0 | 5 | 20.35  | 1.39  |
| -6 | 0 | 5 | 28.19  | 2.56  |
| -6 | 0 | 5 | 29.10  | 2.19  |
| -6 | 0 | 5 | 25.06  | 1.95  |
| -6 | 0 | 5 | 30.67  | 2.32  |
| -6 | 0 | 5 | 22.24  | 1.74  |

## CIF 31

|    |   |   |         |       |
|----|---|---|---------|-------|
| -6 | 0 | 5 | 28.15   | 1.88  |
| -6 | 0 | 5 | 26.86   | 1.86  |
| -6 | 0 | 5 | 20.41   | 1.46  |
| -6 | 0 | 5 | 21.63   | 1.88  |
| -6 | 0 | 5 | 23.78   | 1.67  |
| -6 | 0 | 5 | 19.08   | 1.60  |
| -6 | 0 | 5 | 29.78   | 2.18  |
| -6 | 0 | 5 | 25.22   | 2.05  |
| -6 | 0 | 5 | 26.56   | 2.04  |
| -6 | 0 | 5 | 23.41   | 1.72  |
| -6 | 0 | 5 | 21.22   | 1.67  |
| -6 | 0 | 5 | 17.91   | 1.38  |
| -6 | 0 | 6 | 1848.13 | 20.91 |
| -6 | 0 | 6 | 1751.13 | 19.48 |
| -6 | 0 | 6 | 1776.91 | 19.65 |
| -6 | 0 | 6 | 1747.22 | 19.67 |
| -6 | 0 | 6 | 1781.08 | 20.21 |
| -6 | 0 | 6 | 1674.16 | 20.31 |
| -6 | 0 | 6 | 1722.45 | 19.68 |
| -6 | 0 | 6 | 1686.03 | 19.80 |
| -6 | 0 | 6 | 1725.37 | 20.72 |
| -6 | 0 | 6 | 1751.19 | 19.44 |
| -6 | 0 | 6 | 1684.86 | 20.44 |
| -6 | 0 | 6 | 1704.84 | 18.43 |
| -6 | 0 | 6 | 1762.02 | 21.32 |
| -6 | 0 | 6 | 1742.36 | 20.54 |
| -6 | 0 | 6 | 1823.58 | 21.12 |
| -6 | 0 | 6 | 1714.26 | 18.86 |
| -6 | 0 | 6 | 1676.60 | 19.32 |
| -6 | 0 | 6 | 1753.05 | 21.08 |
| -6 | 0 | 6 | 1670.11 | 22.62 |
| -6 | 0 | 6 | 1624.59 | 20.28 |
| -6 | 0 | 6 | 1482.31 | 17.80 |
| -6 | 0 | 7 | 609.37  | 10.19 |
| -6 | 0 | 7 | 634.20  | 10.45 |
| -6 | 0 | 7 | 644.63  | 10.86 |
| -6 | 0 | 7 | 609.75  | 10.39 |
| -6 | 0 | 7 | 610.74  | 9.21  |
| -6 | 0 | 7 | 614.14  | 10.08 |
| -6 | 0 | 7 | 644.98  | 10.21 |
| -6 | 0 | 7 | 602.63  | 9.53  |

## CIF 31

|    |   |   |        |       |
|----|---|---|--------|-------|
| -6 | 0 | 7 | 639.93 | 9.40  |
| -6 | 0 | 7 | 543.04 | 10.32 |
| -6 | 0 | 7 | 612.64 | 10.78 |
| -6 | 0 | 7 | 641.28 | 11.17 |
| -6 | 0 | 7 | 609.05 | 8.99  |
| -6 | 0 | 7 | 610.51 | 8.72  |
| -6 | 0 | 7 | 674.34 | 11.01 |
| -6 | 0 | 7 | 613.61 | 12.21 |
| -6 | 0 | 7 | 617.72 | 10.47 |
| -6 | 0 | 7 | 604.93 | 9.56  |
| -6 | 0 | 7 | 613.00 | 10.76 |
| -6 | 0 | 7 | 639.28 | 10.91 |
| -6 | 0 | 7 | 615.78 | 10.06 |
| -6 | 0 | 7 | 621.72 | 10.31 |
| -6 | 0 | 8 | 3.11   | 1.45  |
| -6 | 0 | 8 | 1.18   | 0.99  |
| -6 | 0 | 8 | 1.93   | 1.06  |
| -6 | 0 | 8 | 2.07   | 0.91  |
| -6 | 0 | 8 | 1.45   | 1.09  |
| -6 | 0 | 8 | 1.26   | 0.77  |
| -6 | 0 | 8 | 2.96   | 1.01  |
| -6 | 0 | 8 | 2.88   | 0.93  |
| -6 | 0 | 8 | 1.81   | 1.03  |
| -6 | 0 | 8 | 2.07   | 0.89  |
| -6 | 0 | 8 | 1.54   | 1.08  |
| -6 | 0 | 8 | 1.96   | 1.10  |
| -6 | 0 | 8 | 1.81   | 1.04  |
| -6 | 0 | 8 | 1.29   | 0.93  |
| -6 | 0 | 8 | 0.68   | 1.10  |
| -6 | 0 | 8 | 2.82   | 1.13  |
| -6 | 0 | 8 | 4.23   | 0.81  |
| -6 | 0 | 8 | 0.98   | 0.90  |
| -6 | 0 | 9 | 0.18   | 0.84  |
| -6 | 0 | 9 | 0.62   | 1.01  |
| -6 | 0 | 9 | 0.89   | 1.12  |
| -6 | 0 | 9 | 0.25   | 1.28  |
| -6 | 0 | 9 | 1.26   | 1.18  |
| -6 | 0 | 9 | 1.53   | 1.27  |
| -6 | 0 | 9 | 0.17   | 0.98  |
| -6 | 0 | 9 | 2.12   | 0.94  |
| -6 | 0 | 9 | 0.56   | 0.91  |

## CIF 31

|    |   |    |        |      |
|----|---|----|--------|------|
| -6 | 0 | 9  | 0.19   | 0.77 |
| -6 | 0 | 9  | 0.50   | 0.90 |
| -6 | 0 | 9  | 0.68   | 0.76 |
| -6 | 0 | 9  | 0.91   | 1.11 |
| -6 | 0 | 9  | 0.26   | 1.09 |
| -6 | 0 | 9  | 3.19   | 1.39 |
| -6 | 0 | 9  | 0.35   | 0.90 |
| -6 | 0 | 9  | 0.54   | 0.87 |
| -6 | 0 | 10 | 122.70 | 4.23 |
| -6 | 0 | 10 | 133.46 | 5.02 |
| -6 | 0 | 10 | 123.34 | 4.64 |
| -6 | 0 | 10 | 132.95 | 4.82 |
| -6 | 0 | 10 | 122.42 | 4.78 |
| -6 | 0 | 10 | 117.64 | 3.72 |
| -6 | 0 | 10 | 128.00 | 4.90 |
| -6 | 0 | 10 | 128.89 | 4.45 |
| -6 | 0 | 10 | 128.43 | 4.30 |
| -6 | 0 | 10 | 126.77 | 4.66 |
| -6 | 0 | 10 | 133.65 | 4.56 |
| -6 | 0 | 10 | 137.11 | 5.11 |
| -6 | 0 | 10 | 140.62 | 5.18 |
| -6 | 0 | 10 | 132.80 | 4.57 |
| -6 | 0 | 10 | 134.48 | 5.03 |
| -6 | 0 | 10 | 118.58 | 4.65 |
| -6 | 0 | 11 | 124.78 | 4.38 |
| -6 | 0 | 11 | 133.81 | 4.42 |
| -6 | 0 | 11 | 124.12 | 4.81 |
| -6 | 0 | 11 | 120.68 | 4.73 |
| -6 | 0 | 11 | 125.66 | 4.88 |
| -6 | 0 | 11 | 112.16 | 4.25 |
| -6 | 0 | 11 | 127.02 | 4.32 |
| -6 | 0 | 11 | 110.99 | 4.44 |
| -6 | 0 | 11 | 116.80 | 4.57 |
| -6 | 0 | 11 | 121.75 | 4.78 |
| -6 | 0 | 11 | 115.32 | 4.71 |
| -6 | 0 | 11 | 121.03 | 4.82 |
| -6 | 0 | 11 | 128.84 | 4.94 |
| -6 | 0 | 11 | 117.37 | 4.32 |
| -6 | 0 | 12 | 96.74  | 4.27 |
| -6 | 0 | 12 | 96.91  | 3.84 |
| -6 | 0 | 12 | 90.75  | 3.63 |

## CIF 31

|    |   |     |        |      |
|----|---|-----|--------|------|
| -6 | 0 | 12  | 95.54  | 4.14 |
| -6 | 0 | 12  | 86.90  | 3.69 |
| -6 | 0 | 12  | 95.35  | 3.69 |
| -6 | 0 | 12  | 86.94  | 3.95 |
| -6 | 0 | 12  | 89.01  | 3.96 |
| -6 | 0 | 12  | 92.03  | 3.64 |
| -6 | 0 | 12  | 84.96  | 3.93 |
| -6 | 0 | 12  | 95.81  | 4.10 |
| -6 | 0 | 12  | 98.14  | 3.87 |
| -6 | 0 | 12  | 91.61  | 4.01 |
| -6 | 0 | 12  | 82.75  | 3.95 |
| -6 | 0 | 13  | 114.15 | 4.16 |
| -6 | 0 | 13  | 120.41 | 3.99 |
| -6 | 0 | 13  | 115.45 | 4.28 |
| -6 | 0 | 13  | 130.86 | 4.10 |
| -6 | 0 | 13  | 119.60 | 4.30 |
| -6 | 0 | 13  | 118.55 | 4.34 |
| -6 | 0 | 13  | 134.15 | 4.16 |
| -6 | 0 | 13  | 140.65 | 4.64 |
| -6 | 0 | 13  | 131.83 | 3.99 |
| -6 | 0 | 13  | 125.50 | 4.17 |
| -6 | 0 | 13  | 123.09 | 4.55 |
| -6 | 0 | 13  | 117.85 | 4.33 |
| -6 | 0 | 14  | 28.55  | 1.77 |
| -6 | 0 | 14  | 28.98  | 1.81 |
| -6 | 0 | 14  | 29.32  | 1.88 |
| -6 | 0 | 14  | 31.31  | 2.06 |
| -6 | 0 | 14  | 28.03  | 1.90 |
| -6 | 0 | 14  | 29.57  | 2.05 |
| -6 | 0 | 15  | 343.24 | 5.56 |
| -6 | 0 | 15  | 337.72 | 5.83 |
| -6 | 0 | 15  | 354.86 | 5.95 |
| -6 | 0 | 15  | 342.50 | 5.21 |
| -6 | 1 | -10 | 9.06   | 3.27 |
| -6 | 1 | -9  | 27.98  | 4.07 |
| -6 | 1 | -9  | 22.75  | 1.33 |
| -6 | 1 | -9  | 30.50  | 4.22 |
| -6 | 1 | -9  | 23.63  | 1.60 |
| -6 | 1 | -9  | 21.44  | 2.49 |
| -6 | 1 | -9  | 25.62  | 1.56 |
| -6 | 1 | -9  | 18.36  | 6.31 |

## CIF 31

|    |   |    |        |       |
|----|---|----|--------|-------|
| -6 | 1 | -8 | 51.34  | 2.42  |
| -6 | 1 | -8 | 48.12  | 2.12  |
| -6 | 1 | -8 | 50.40  | 2.55  |
| -6 | 1 | -8 | 52.25  | 2.34  |
| -6 | 1 | -8 | 49.14  | 3.57  |
| -6 | 1 | -8 | 45.16  | 2.32  |
| -6 | 1 | -8 | 50.67  | 2.66  |
| -6 | 1 | -8 | 48.76  | 2.74  |
| -6 | 1 | -7 | 117.85 | 3.43  |
| -6 | 1 | -7 | 122.70 | 4.03  |
| -6 | 1 | -7 | 122.49 | 3.96  |
| -6 | 1 | -7 | 117.10 | 7.68  |
| -6 | 1 | -7 | 114.17 | 5.21  |
| -6 | 1 | -7 | 132.67 | 4.38  |
| -6 | 1 | -7 | 128.55 | 3.80  |
| -6 | 1 | -7 | 129.25 | 4.20  |
| -6 | 1 | -7 | 127.23 | 4.12  |
| -6 | 1 | -7 | 128.21 | 4.25  |
| -6 | 1 | -7 | 130.53 | 4.02  |
| -6 | 1 | -6 | 41.43  | 2.56  |
| -6 | 1 | -6 | 33.10  | 2.11  |
| -6 | 1 | -6 | 39.41  | 3.27  |
| -6 | 1 | -6 | 34.76  | 2.12  |
| -6 | 1 | -6 | 36.25  | 2.44  |
| -6 | 1 | -6 | 34.56  | 2.19  |
| -6 | 1 | -6 | 36.37  | 2.37  |
| -6 | 1 | -6 | 35.26  | 2.42  |
| -6 | 1 | -6 | 35.55  | 2.29  |
| -6 | 1 | -6 | 37.69  | 5.48  |
| -6 | 1 | -5 | 6.92   | 1.20  |
| -6 | 1 | -5 | 7.25   | 1.36  |
| -6 | 1 | -5 | 7.88   | 1.44  |
| -6 | 1 | -5 | 6.89   | 1.26  |
| -6 | 1 | -5 | 10.89  | 3.99  |
| -6 | 1 | -5 | 5.17   | 1.02  |
| -6 | 1 | -5 | 5.73   | 1.12  |
| -6 | 1 | -5 | 5.29   | 1.20  |
| -6 | 1 | -5 | 7.81   | 1.14  |
| -6 | 1 | -5 | 5.18   | 1.76  |
| -6 | 1 | -5 | 6.75   | 1.22  |
| -6 | 1 | -4 | 903.16 | 12.24 |

## CIF 31

|    |   |    |        |       |
|----|---|----|--------|-------|
| -6 | 1 | -4 | 836.25 | 12.50 |
| -6 | 1 | -4 | 835.14 | 11.85 |
| -6 | 1 | -4 | 873.56 | 12.16 |
| -6 | 1 | -4 | 860.15 | 12.34 |
| -6 | 1 | -4 | 956.82 | 15.52 |
| -6 | 1 | -4 | 861.41 | 12.01 |
| -6 | 1 | -4 | 873.73 | 12.58 |
| -6 | 1 | -4 | 959.43 | 14.91 |
| -6 | 1 | -4 | 875.97 | 12.47 |
| -6 | 1 | -4 | 882.98 | 11.80 |
| -6 | 1 | -4 | 891.07 | 12.63 |
| -6 | 1 | -3 | 165.31 | 4.62  |
| -6 | 1 | -3 | 155.21 | 4.48  |
| -6 | 1 | -3 | 177.03 | 5.97  |
| -6 | 1 | -3 | 162.53 | 4.56  |
| -6 | 1 | -3 | 163.70 | 4.43  |
| -6 | 1 | -3 | 148.74 | 4.43  |
| -6 | 1 | -3 | 183.53 | 6.34  |
| -6 | 1 | -3 | 156.92 | 4.23  |
| -6 | 1 | -3 | 154.18 | 4.51  |
| -6 | 1 | -3 | 169.36 | 4.41  |
| -6 | 1 | -3 | 153.26 | 4.29  |
| -6 | 1 | -2 | 848.02 | 11.90 |
| -6 | 1 | -2 | 950.13 | 12.05 |
| -6 | 1 | -2 | 879.60 | 12.58 |
| -6 | 1 | -2 | 847.16 | 11.78 |
| -6 | 1 | -2 | 910.86 | 12.04 |
| -6 | 1 | -2 | 898.23 | 13.04 |
| -6 | 1 | -2 | 940.08 | 14.47 |
| -6 | 1 | -2 | 898.36 | 11.85 |
| -6 | 1 | -2 | 864.73 | 10.83 |
| -6 | 1 | -2 | 906.73 | 13.84 |
| -6 | 1 | -2 | 910.54 | 11.65 |
| -6 | 1 | -1 | 97.82  | 3.69  |
| -6 | 1 | -1 | 96.46  | 3.67  |
| -6 | 1 | -1 | 94.68  | 4.85  |
| -6 | 1 | -1 | 99.70  | 3.18  |
| -6 | 1 | -1 | 98.67  | 3.22  |
| -6 | 1 | -1 | 98.59  | 2.95  |
| -6 | 1 | -1 | 104.47 | 3.27  |
| -6 | 1 | -1 | 101.22 | 3.25  |



## CIF 31

|    |   |    |        |       |
|----|---|----|--------|-------|
| -6 | 1 | -1 | 89.89  | 3.89  |
| -6 | 1 | 0  | 520.50 | 7.74  |
| -6 | 1 | 0  | 531.50 | 9.06  |
| -6 | 1 | 0  | 601.99 | 10.33 |
| -6 | 1 | 0  | 503.48 | 7.82  |
| -6 | 1 | 0  | 502.04 | 7.67  |
| -6 | 1 | 0  | 492.65 | 9.75  |
| -6 | 1 | 0  | 526.93 | 9.32  |
| -6 | 1 | 0  | 546.88 | 9.74  |
| -6 | 1 | 0  | 552.62 | 8.68  |
| -6 | 1 | 0  | 583.87 | 9.48  |
| -6 | 1 | 0  | 502.54 | 9.51  |
| -6 | 1 | 1  | 9.20   | 1.03  |
| -6 | 1 | 1  | 7.07   | 1.34  |
| -6 | 1 | 1  | 6.17   | 1.41  |
| -6 | 1 | 1  | 7.94   | 1.15  |
| -6 | 1 | 1  | 7.56   | 1.33  |
| -6 | 1 | 1  | 10.01  | 0.94  |
| -6 | 1 | 1  | 6.73   | 1.00  |
| -6 | 1 | 1  | 10.28  | 1.50  |
| -6 | 1 | 1  | 7.82   | 0.86  |
| -6 | 1 | 1  | 8.23   | 1.30  |
| -6 | 1 | 1  | 9.40   | 1.11  |
| -6 | 1 | 1  | 8.76   | 0.98  |
| -6 | 1 | 2  | 809.48 | 10.55 |
| -6 | 1 | 2  | 759.09 | 11.91 |
| -6 | 1 | 2  | 705.19 | 11.39 |
| -6 | 1 | 2  | 838.00 | 12.51 |
| -6 | 1 | 2  | 746.65 | 11.92 |
| -6 | 1 | 2  | 779.96 | 9.77  |
| -6 | 1 | 2  | 809.04 | 11.94 |
| -6 | 1 | 2  | 789.35 | 9.71  |
| -6 | 1 | 2  | 776.59 | 10.07 |
| -6 | 1 | 2  | 770.52 | 10.38 |
| -6 | 1 | 2  | 780.27 | 10.86 |
| -6 | 1 | 2  | 807.57 | 12.95 |
| -6 | 1 | 3  | -0.07  | 0.72  |
| -6 | 1 | 3  | 1.37   | 0.75  |
| -6 | 1 | 3  | 1.30   | 0.60  |
| -6 | 1 | 3  | 0.86   | 1.01  |
| -6 | 1 | 3  | 1.07   | 0.90  |

## CIF 31

|    |   |   |         |       |
|----|---|---|---------|-------|
| -6 | 1 | 3 | 0.86    | 0.80  |
| -6 | 1 | 3 | 1.58    | 0.63  |
| -6 | 1 | 3 | 1.18    | 0.57  |
| -6 | 1 | 3 | 3.26    | 0.85  |
| -6 | 1 | 4 | 248.51  | 4.88  |
| -6 | 1 | 4 | 248.65  | 5.71  |
| -6 | 1 | 4 | 250.71  | 6.02  |
| -6 | 1 | 4 | 251.58  | 5.69  |
| -6 | 1 | 4 | 242.55  | 5.56  |
| -6 | 1 | 4 | 256.30  | 5.42  |
| -6 | 1 | 4 | 239.12  | 4.98  |
| -6 | 1 | 4 | 222.85  | 6.57  |
| -6 | 1 | 4 | 250.76  | 4.93  |
| -6 | 1 | 4 | 251.26  | 5.15  |
| -6 | 1 | 4 | 258.60  | 5.41  |
| -6 | 1 | 4 | 267.12  | 6.28  |
| -6 | 1 | 4 | 247.45  | 5.89  |
| -6 | 1 | 4 | 247.50  | 5.24  |
| -6 | 1 | 4 | 236.63  | 6.01  |
| -6 | 1 | 4 | 257.61  | 6.21  |
| -6 | 1 | 5 | 944.22  | 13.01 |
| -6 | 1 | 5 | 1003.61 | 13.85 |
| -6 | 1 | 5 | 894.59  | 11.31 |
| -6 | 1 | 5 | 998.02  | 15.34 |
| -6 | 1 | 5 | 889.19  | 11.58 |
| -6 | 1 | 5 | 949.20  | 12.25 |
| -6 | 1 | 5 | 899.35  | 13.06 |
| -6 | 1 | 5 | 922.38  | 11.61 |
| -6 | 1 | 5 | 895.27  | 13.16 |
| -6 | 1 | 5 | 955.06  | 12.49 |
| -6 | 1 | 5 | 916.18  | 13.35 |
| -6 | 1 | 5 | 989.62  | 13.88 |
| -6 | 1 | 5 | 959.06  | 13.38 |
| -6 | 1 | 5 | 916.71  | 12.91 |
| -6 | 1 | 5 | 923.32  | 12.07 |
| -6 | 1 | 5 | 942.72  | 12.46 |
| -6 | 1 | 5 | 907.64  | 11.74 |
| -6 | 1 | 5 | 928.17  | 12.92 |
| -6 | 1 | 6 | 9.57    | 1.23  |
| -6 | 1 | 6 | 9.60    | 1.51  |
| -6 | 1 | 6 | 8.51    | 1.67  |

## CIF 31

|    |   |   |         |       |
|----|---|---|---------|-------|
| -6 | 1 | 6 | 15.79   | 1.25  |
| -6 | 1 | 6 | 10.61   | 1.45  |
| -6 | 1 | 6 | 12.62   | 1.58  |
| -6 | 1 | 6 | 9.04    | 1.44  |
| -6 | 1 | 6 | 10.61   | 1.43  |
| -6 | 1 | 6 | 10.00   | 1.40  |
| -6 | 1 | 6 | 9.37    | 1.39  |
| -6 | 1 | 6 | 16.24   | 1.62  |
| -6 | 1 | 6 | 8.32    | 1.11  |
| -6 | 1 | 6 | 10.52   | 1.21  |
| -6 | 1 | 6 | 9.35    | 1.19  |
| -6 | 1 | 6 | 9.66    | 1.29  |
| -6 | 1 | 6 | 8.27    | 1.12  |
| -6 | 1 | 6 | 6.95    | 1.21  |
| -6 | 1 | 7 | 1056.54 | 15.04 |
| -6 | 1 | 7 | 937.58  | 11.84 |
| -6 | 1 | 7 | 979.48  | 14.58 |
| -6 | 1 | 7 | 1018.20 | 13.95 |
| -6 | 1 | 7 | 1039.71 | 14.37 |
| -6 | 1 | 7 | 1052.58 | 13.44 |
| -6 | 1 | 7 | 897.92  | 14.22 |
| -6 | 1 | 7 | 1088.85 | 14.79 |
| -6 | 1 | 7 | 1027.09 | 16.19 |
| -6 | 1 | 7 | 1031.20 | 13.91 |
| -6 | 1 | 7 | 1031.45 | 12.96 |
| -6 | 1 | 7 | 1049.90 | 13.80 |
| -6 | 1 | 7 | 1063.57 | 13.85 |
| -6 | 1 | 7 | 968.04  | 14.48 |
| -6 | 1 | 7 | 966.04  | 14.27 |
| -6 | 1 | 7 | 1007.38 | 14.09 |
| -6 | 1 | 7 | 1022.76 | 14.46 |
| -6 | 1 | 8 | 621.35  | 9.22  |
| -6 | 1 | 8 | 651.25  | 10.82 |
| -6 | 1 | 8 | 592.71  | 10.89 |
| -6 | 1 | 8 | 588.03  | 10.11 |
| -6 | 1 | 8 | 636.80  | 11.09 |
| -6 | 1 | 8 | 657.30  | 11.31 |
| -6 | 1 | 8 | 622.49  | 10.84 |
| -6 | 1 | 8 | 601.23  | 11.92 |
| -6 | 1 | 8 | 561.02  | 10.54 |
| -6 | 1 | 8 | 655.02  | 10.12 |

## CIF 31

|    |   |    |        |       |
|----|---|----|--------|-------|
| -6 | 1 | 8  | 591.84 | 10.47 |
| -6 | 1 | 8  | 636.82 | 11.13 |
| -6 | 1 | 8  | 641.93 | 11.21 |
| -6 | 1 | 8  | 651.24 | 10.51 |
| -6 | 1 | 8  | 633.04 | 11.25 |
| -6 | 1 | 8  | 604.05 | 10.13 |
| -6 | 1 | 8  | 570.72 | 9.99  |
| -6 | 1 | 9  | 136.93 | 5.50  |
| -6 | 1 | 9  | 185.34 | 5.61  |
| -6 | 1 | 9  | 169.43 | 5.39  |
| -6 | 1 | 9  | 155.11 | 5.18  |
| -6 | 1 | 9  | 160.63 | 5.01  |
| -6 | 1 | 9  | 157.71 | 5.04  |
| -6 | 1 | 9  | 176.42 | 5.60  |
| -6 | 1 | 9  | 163.02 | 5.51  |
| -6 | 1 | 9  | 167.45 | 5.24  |
| -6 | 1 | 9  | 181.64 | 5.08  |
| -6 | 1 | 10 | 2.14   | 1.18  |
| -6 | 1 | 10 | 2.32   | 1.02  |
| -6 | 1 | 10 | 2.25   | 1.29  |
| -6 | 1 | 10 | 1.01   | 0.89  |
| -6 | 1 | 10 | 1.59   | 0.96  |
| -6 | 1 | 10 | 1.92   | 0.95  |
| -6 | 1 | 10 | 1.61   | 1.16  |
| -6 | 1 | 10 | 2.81   | 1.08  |
| -6 | 1 | 10 | 2.02   | 0.99  |
| -6 | 1 | 10 | 1.96   | 1.17  |
| -6 | 1 | 10 | 2.01   | 1.14  |
| -6 | 1 | 11 | 236.76 | 6.02  |
| -6 | 1 | 11 | 241.77 | 6.95  |
| -6 | 1 | 11 | 236.91 | 6.68  |
| -6 | 1 | 11 | 249.27 | 6.30  |
| -6 | 1 | 11 | 238.14 | 6.63  |
| -6 | 1 | 11 | 227.56 | 6.71  |
| -6 | 1 | 11 | 256.32 | 6.32  |
| -6 | 1 | 11 | 238.18 | 6.70  |
| -6 | 1 | 11 | 247.96 | 6.97  |
| -6 | 1 | 11 | 250.66 | 7.08  |
| -6 | 1 | 11 | 227.75 | 6.04  |
| -6 | 1 | 12 | 85.50  | 3.54  |
| -6 | 1 | 12 | 77.32  | 3.81  |

## CIF 31

|    |   |     |        |      |
|----|---|-----|--------|------|
| -6 | 1 | 12  | 76.83  | 3.80 |
| -6 | 1 | 12  | 83.51  | 3.97 |
| -6 | 1 | 12  | 85.38  | 3.81 |
| -6 | 1 | 12  | 79.66  | 3.42 |
| -6 | 1 | 12  | 82.25  | 3.88 |
| -6 | 1 | 12  | 77.95  | 3.61 |
| -6 | 1 | 12  | 81.50  | 3.27 |
| -6 | 1 | 12  | 83.70  | 3.90 |
| -6 | 1 | 12  | 80.50  | 3.45 |
| -6 | 1 | 13  | 188.76 | 5.42 |
| -6 | 1 | 13  | 188.92 | 4.86 |
| -6 | 1 | 13  | 188.11 | 5.05 |
| -6 | 1 | 13  | 188.92 | 5.55 |
| -6 | 1 | 13  | 201.19 | 5.74 |
| -6 | 1 | 13  | 190.14 | 5.49 |
| -6 | 1 | 13  | 190.95 | 5.58 |
| -6 | 1 | 13  | 185.09 | 5.47 |
| -6 | 1 | 13  | 200.59 | 5.48 |
| -6 | 1 | 13  | 191.49 | 5.57 |
| -6 | 1 | 13  | 203.91 | 5.20 |
| -6 | 1 | 14  | 39.85  | 1.95 |
| -6 | 1 | 14  | 40.57  | 2.30 |
| -6 | 1 | 14  | 42.69  | 2.32 |
| -6 | 1 | 14  | 39.50  | 2.08 |
| -6 | 1 | 14  | 38.48  | 2.23 |
| -6 | 1 | 14  | 41.55  | 2.38 |
| -6 | 1 | 14  | 41.86  | 2.24 |
| -6 | 1 | 14  | 38.91  | 1.94 |
| -6 | 1 | 15  | 37.64  | 1.57 |
| -6 | 1 | 15  | 37.52  | 1.73 |
| -6 | 1 | 15  | 40.15  | 1.80 |
| -6 | 1 | 15  | 37.36  | 1.67 |
| -6 | 2 | -10 | 67.50  | 3.96 |
| -6 | 2 | -10 | 66.48  | 2.56 |
| -6 | 2 | -9  | 2.39   | 2.89 |
| -6 | 2 | -9  | 3.60   | 1.01 |
| -6 | 2 | -9  | 3.68   | 0.97 |
| -6 | 2 | -9  | 3.35   | 0.84 |
| -6 | 2 | -9  | 1.10   | 5.08 |
| -6 | 2 | -9  | 3.05   | 0.81 |
| -6 | 2 | -9  | 5.10   | 2.11 |

## CIF 31

|    |   |    |         |       |
|----|---|----|---------|-------|
| -6 | 2 | -9 | 2.48    | 2.06  |
| -6 | 2 | -9 | 4.60    | 2.29  |
| -6 | 2 | -8 | 357.31  | 7.36  |
| -6 | 2 | -8 | 327.55  | 5.97  |
| -6 | 2 | -8 | 358.46  | 7.09  |
| -6 | 2 | -8 | 309.37  | 8.41  |
| -6 | 2 | -8 | 364.57  | 6.65  |
| -6 | 2 | -8 | 347.84  | 6.70  |
| -6 | 2 | -8 | 347.18  | 6.74  |
| -6 | 2 | -8 | 340.91  | 5.83  |
| -6 | 2 | -8 | 352.97  | 7.18  |
| -6 | 2 | -8 | 329.02  | 8.77  |
| -6 | 2 | -8 | 345.10  | 6.96  |
| -6 | 2 | -7 | 8.75    | 2.55  |
| -6 | 2 | -7 | 12.23   | 1.40  |
| -6 | 2 | -7 | 11.77   | 1.68  |
| -6 | 2 | -7 | 12.58   | 1.48  |
| -6 | 2 | -7 | 13.35   | 1.30  |
| -6 | 2 | -7 | 12.79   | 1.65  |
| -6 | 2 | -7 | 13.49   | 1.43  |
| -6 | 2 | -7 | 11.03   | 1.62  |
| -6 | 2 | -7 | 13.38   | 1.70  |
| -6 | 2 | -7 | 10.47   | 1.38  |
| -6 | 2 | -6 | 78.34   | 3.52  |
| -6 | 2 | -6 | 76.13   | 3.13  |
| -6 | 2 | -6 | 82.34   | 3.05  |
| -6 | 2 | -6 | 80.88   | 3.47  |
| -6 | 2 | -6 | 78.56   | 3.14  |
| -6 | 2 | -6 | 79.94   | 3.34  |
| -6 | 2 | -6 | 83.77   | 4.25  |
| -6 | 2 | -6 | 77.36   | 3.46  |
| -6 | 2 | -5 | 963.37  | 13.76 |
| -6 | 2 | -5 | 979.11  | 12.83 |
| -6 | 2 | -5 | 964.78  | 13.51 |
| -6 | 2 | -5 | 974.85  | 12.92 |
| -6 | 2 | -5 | 853.30  | 14.71 |
| -6 | 2 | -5 | 884.46  | 15.70 |
| -6 | 2 | -5 | 967.13  | 12.99 |
| -6 | 2 | -5 | 1003.41 | 13.70 |
| -6 | 2 | -5 | 1003.77 | 12.79 |
| -6 | 2 | -5 | 971.11  | 13.50 |

## CIF 31

|    |   |    |         |       |
|----|---|----|---------|-------|
| -6 | 2 | -4 | 13.94   | 1.56  |
| -6 | 2 | -4 | 11.05   | 1.40  |
| -6 | 2 | -4 | 17.40   | 2.06  |
| -6 | 2 | -4 | 10.89   | 1.43  |
| -6 | 2 | -4 | 19.65   | 1.57  |
| -6 | 2 | -4 | 11.55   | 1.31  |
| -6 | 2 | -4 | 11.82   | 1.47  |
| -6 | 2 | -4 | 18.20   | 2.34  |
| -6 | 2 | -4 | 12.01   | 1.32  |
| -6 | 2 | -4 | 11.42   | 1.55  |
| -6 | 2 | -3 | 166.69  | 4.51  |
| -6 | 2 | -3 | 171.24  | 4.61  |
| -6 | 2 | -3 | 155.91  | 5.07  |
| -6 | 2 | -3 | 152.30  | 3.91  |
| -6 | 2 | -3 | 160.25  | 5.67  |
| -6 | 2 | -3 | 176.76  | 4.24  |
| -6 | 2 | -3 | 162.03  | 4.54  |
| -6 | 2 | -3 | 163.46  | 4.43  |
| -6 | 2 | -3 | 168.76  | 4.26  |
| -6 | 2 | -2 | 1457.30 | 18.28 |
| -6 | 2 | -2 | 1607.02 | 17.14 |
| -6 | 2 | -2 | 1526.13 | 20.15 |
| -6 | 2 | -2 | 1514.01 | 16.31 |
| -6 | 2 | -2 | 1536.97 | 17.38 |
| -6 | 2 | -2 | 1527.27 | 17.40 |
| -6 | 2 | -2 | 1493.28 | 17.32 |
| -6 | 2 | -2 | 1561.32 | 18.60 |
| -6 | 2 | -2 | 1527.99 | 17.42 |
| -6 | 2 | -2 | 1559.67 | 16.64 |
| -6 | 2 | -1 | 1244.96 | 14.77 |
| -6 | 2 | -1 | 1234.82 | 15.69 |
| -6 | 2 | -1 | 1351.22 | 16.76 |
| -6 | 2 | -1 | 1255.92 | 14.29 |
| -6 | 2 | -1 | 1260.55 | 15.07 |
| -6 | 2 | -1 | 1344.45 | 16.73 |
| -6 | 2 | -1 | 1230.19 | 14.62 |
| -6 | 2 | -1 | 1351.02 | 17.11 |
| -6 | 2 | -1 | 1294.37 | 15.03 |
| -6 | 2 | 0  | 2563.24 | 27.79 |
| -6 | 2 | 0  | 2637.78 | 25.42 |
| -6 | 2 | 0  | 2527.05 | 28.27 |

## CIF 31

|    |   |   |         |       |
|----|---|---|---------|-------|
| -6 | 2 | 0 | 2621.20 | 25.54 |
| -6 | 2 | 0 | 2428.67 | 28.26 |
| -6 | 2 | 0 | 2670.98 | 23.78 |
| -6 | 2 | 0 | 2568.94 | 28.24 |
| -6 | 2 | 0 | 2743.91 | 28.35 |
| -6 | 2 | 0 | 2613.54 | 25.77 |
| -6 | 2 | 0 | 2698.79 | 27.92 |
| -6 | 2 | 1 | 74.96   | 3.35  |
| -6 | 2 | 1 | 75.12   | 3.22  |
| -6 | 2 | 1 | 82.86   | 2.67  |
| -6 | 2 | 1 | 79.22   | 3.26  |
| -6 | 2 | 1 | 80.85   | 3.35  |
| -6 | 2 | 1 | 73.34   | 3.28  |
| -6 | 2 | 1 | 81.35   | 2.64  |
| -6 | 2 | 1 | 79.72   | 3.39  |
| -6 | 2 | 1 | 73.99   | 2.73  |
| -6 | 2 | 1 | 69.88   | 3.37  |
| -6 | 2 | 2 | 422.80  | 8.10  |
| -6 | 2 | 2 | 428.73  | 7.19  |
| -6 | 2 | 2 | 411.92  | 8.15  |
| -6 | 2 | 2 | 396.65  | 8.05  |
| -6 | 2 | 2 | 414.40  | 6.61  |
| -6 | 2 | 2 | 398.94  | 7.79  |
| -6 | 2 | 2 | 444.24  | 8.30  |
| -6 | 2 | 2 | 406.99  | 8.52  |
| -6 | 2 | 2 | 430.35  | 6.71  |
| -6 | 2 | 2 | 421.73  | 7.10  |
| -6 | 2 | 2 | 420.57  | 7.03  |
| -6 | 2 | 3 | 273.08  | 5.19  |
| -6 | 2 | 3 | 302.43  | 6.60  |
| -6 | 2 | 3 | 317.29  | 6.92  |
| -6 | 2 | 3 | 292.46  | 6.99  |
| -6 | 2 | 3 | 274.54  | 6.47  |
| -6 | 2 | 3 | 276.11  | 6.47  |
| -6 | 2 | 3 | 302.77  | 5.53  |
| -6 | 2 | 3 | 303.90  | 5.81  |
| -6 | 2 | 3 | 285.35  | 5.83  |
| -6 | 2 | 3 | 292.99  | 6.16  |
| -6 | 2 | 3 | 279.43  | 6.72  |
| -6 | 2 | 3 | 235.79  | 6.12  |
| -6 | 2 | 3 | 293.67  | 4.96  |



## CIF 31

|    |   |   |         |       |
|----|---|---|---------|-------|
| -6 | 2 | 3 | 288.79  | 5.24  |
| -6 | 2 | 3 | 306.12  | 5.95  |
| -6 | 2 | 3 | 275.84  | 5.65  |
| -6 | 2 | 4 | 48.03   | 2.14  |
| -6 | 2 | 4 | 46.65   | 2.63  |
| -6 | 2 | 4 | 48.85   | 2.02  |
| -6 | 2 | 4 | 44.97   | 2.30  |
| -6 | 2 | 4 | 44.43   | 2.58  |
| -6 | 2 | 4 | 45.29   | 2.37  |
| -6 | 2 | 4 | 40.78   | 2.49  |
| -6 | 2 | 4 | 49.46   | 2.21  |
| -6 | 2 | 4 | 45.63   | 2.00  |
| -6 | 2 | 4 | 46.45   | 2.55  |
| -6 | 2 | 4 | 49.73   | 2.56  |
| -6 | 2 | 4 | 47.15   | 2.35  |
| -6 | 2 | 5 | 1738.29 | 20.17 |
| -6 | 2 | 5 | 1723.31 | 17.03 |
| -6 | 2 | 5 | 1669.10 | 20.88 |
| -6 | 2 | 5 | 1712.83 | 18.24 |
| -6 | 2 | 5 | 1740.70 | 20.07 |
| -6 | 2 | 5 | 1821.73 | 20.84 |
| -6 | 2 | 5 | 1596.84 | 20.19 |
| -6 | 2 | 5 | 1789.23 | 20.79 |
| -6 | 2 | 5 | 1756.13 | 22.10 |
| -6 | 2 | 5 | 1844.99 | 19.26 |
| -6 | 2 | 5 | 1795.35 | 20.80 |
| -6 | 2 | 5 | 1793.71 | 19.41 |
| -6 | 2 | 5 | 1709.13 | 19.88 |
| -6 | 2 | 5 | 1677.03 | 20.50 |
| -6 | 2 | 5 | 1729.56 | 19.33 |
| -6 | 2 | 5 | 1808.28 | 18.57 |
| -6 | 2 | 5 | 1782.47 | 19.00 |
| -6 | 2 | 5 | 1824.87 | 21.07 |
| -6 | 2 | 6 | 5.86    | 1.13  |
| -6 | 2 | 6 | 5.00    | 0.99  |
| -6 | 2 | 6 | 5.68    | 1.29  |
| -6 | 2 | 6 | 5.90    | 1.47  |
| -6 | 2 | 6 | 4.39    | 1.06  |
| -6 | 2 | 6 | 5.34    | 1.00  |
| -6 | 2 | 6 | 6.13    | 1.14  |
| -6 | 2 | 6 | 8.02    | 1.38  |

## CIF 31

|    |   |   |        |      |
|----|---|---|--------|------|
| -6 | 2 | 6 | 5.81   | 1.25 |
| -6 | 2 | 6 | 4.21   | 1.16 |
| -6 | 2 | 6 | 5.42   | 1.21 |
| -6 | 2 | 6 | 5.37   | 0.71 |
| -6 | 2 | 6 | 6.20   | 1.28 |
| -6 | 2 | 6 | 5.18   | 1.20 |
| -6 | 2 | 6 | 4.95   | 1.15 |
| -6 | 2 | 6 | 3.78   | 1.05 |
| -6 | 2 | 6 | 5.70   | 1.11 |
| -6 | 2 | 6 | 5.08   | 0.95 |
| -6 | 2 | 7 | 449.65 | 6.84 |
| -6 | 2 | 7 | 385.55 | 7.85 |
| -6 | 2 | 7 | 440.55 | 8.94 |
| -6 | 2 | 7 | 453.46 | 8.87 |
| -6 | 2 | 7 | 459.32 | 8.91 |
| -6 | 2 | 7 | 497.00 | 8.37 |
| -6 | 2 | 7 | 436.78 | 8.16 |
| -6 | 2 | 7 | 427.81 | 8.84 |
| -6 | 2 | 7 | 430.74 | 9.01 |
| -6 | 2 | 7 | 466.42 | 8.84 |
| -6 | 2 | 7 | 472.90 | 9.27 |
| -6 | 2 | 7 | 493.96 | 8.34 |
| -6 | 2 | 7 | 466.61 | 8.60 |
| -6 | 2 | 7 | 421.64 | 9.67 |
| -6 | 2 | 7 | 463.31 | 8.42 |
| -6 | 2 | 7 | 490.04 | 8.70 |
| -6 | 2 | 7 | 466.28 | 8.22 |
| -6 | 2 | 8 | 242.85 | 6.67 |
| -6 | 2 | 8 | 278.87 | 7.70 |
| -6 | 2 | 8 | 251.34 | 6.70 |
| -6 | 2 | 8 | 253.55 | 5.96 |
| -6 | 2 | 8 | 240.66 | 6.66 |
| -6 | 2 | 8 | 256.75 | 6.89 |
| -6 | 2 | 8 | 248.93 | 5.07 |
| -6 | 2 | 8 | 267.63 | 6.49 |
| -6 | 2 | 8 | 264.90 | 6.19 |
| -6 | 2 | 8 | 277.94 | 6.32 |
| -6 | 2 | 8 | 282.17 | 7.16 |
| -6 | 2 | 8 | 257.74 | 6.22 |
| -6 | 2 | 8 | 265.74 | 6.68 |
| -6 | 2 | 8 | 255.72 | 6.75 |

## CIF 31

|    |   |    |        |      |
|----|---|----|--------|------|
| -6 | 2 | 8  | 267.70 | 6.49 |
| -6 | 2 | 8  | 282.32 | 7.10 |
| -6 | 2 | 9  | 56.51  | 3.37 |
| -6 | 2 | 9  | 57.06  | 2.95 |
| -6 | 2 | 9  | 62.63  | 3.29 |
| -6 | 2 | 9  | 53.12  | 3.17 |
| -6 | 2 | 9  | 62.32  | 3.47 |
| -6 | 2 | 9  | 63.71  | 3.07 |
| -6 | 2 | 9  | 59.30  | 3.13 |
| -6 | 2 | 9  | 57.13  | 3.38 |
| -6 | 2 | 9  | 65.46  | 3.13 |
| -6 | 2 | 9  | 49.38  | 3.37 |
| -6 | 2 | 9  | 64.59  | 3.55 |
| -6 | 2 | 9  | 63.80  | 3.44 |
| -6 | 2 | 9  | 61.74  | 3.38 |
| -6 | 2 | 9  | 62.88  | 2.95 |
| -6 | 2 | 9  | 59.62  | 3.44 |
| -6 | 2 | 9  | 59.78  | 2.51 |
| -6 | 2 | 10 | 2.26   | 1.19 |
| -6 | 2 | 10 | 1.74   | 1.05 |
| -6 | 2 | 10 | 1.89   | 0.95 |
| -6 | 2 | 10 | 2.96   | 1.35 |
| -6 | 2 | 10 | 5.07   | 1.43 |
| -6 | 2 | 10 | 3.24   | 1.19 |
| -6 | 2 | 10 | 3.67   | 1.29 |
| -6 | 2 | 10 | 0.89   | 0.88 |
| -6 | 2 | 10 | 2.67   | 1.19 |
| -6 | 2 | 10 | 2.51   | 1.10 |
| -6 | 2 | 10 | 1.88   | 0.72 |
| -6 | 2 | 10 | 3.71   | 1.25 |
| -6 | 2 | 10 | 2.05   | 1.29 |
| -6 | 2 | 10 | 2.65   | 1.42 |
| -6 | 2 | 10 | 2.49   | 1.34 |
| -6 | 2 | 11 | 407.51 | 8.63 |
| -6 | 2 | 11 | 430.28 | 8.90 |
| -6 | 2 | 11 | 368.89 | 7.96 |
| -6 | 2 | 11 | 397.08 | 8.03 |
| -6 | 2 | 11 | 403.59 | 8.86 |
| -6 | 2 | 11 | 431.22 | 9.32 |
| -6 | 2 | 11 | 383.69 | 7.51 |
| -6 | 2 | 11 | 387.46 | 8.49 |

## CIF 31

|    |   |     |        |      |
|----|---|-----|--------|------|
| -6 | 2 | 11  | 418.19 | 8.15 |
| -6 | 2 | 11  | 392.91 | 7.23 |
| -6 | 2 | 11  | 433.30 | 9.36 |
| -6 | 2 | 12  | 54.62  | 3.20 |
| -6 | 2 | 12  | 54.88  | 3.26 |
| -6 | 2 | 12  | 59.48  | 2.91 |
| -6 | 2 | 12  | 52.89  | 3.07 |
| -6 | 2 | 12  | 53.20  | 2.60 |
| -6 | 2 | 12  | 55.12  | 3.12 |
| -6 | 2 | 12  | 58.00  | 3.22 |
| -6 | 2 | 12  | 60.24  | 3.38 |
| -6 | 2 | 13  | 109.24 | 4.17 |
| -6 | 2 | 13  | 107.43 | 3.83 |
| -6 | 2 | 13  | 100.94 | 3.86 |
| -6 | 2 | 13  | 106.76 | 4.03 |
| -6 | 2 | 13  | 110.17 | 3.67 |
| -6 | 2 | 13  | 106.45 | 4.05 |
| -6 | 2 | 13  | 101.62 | 3.94 |
| -6 | 2 | 13  | 95.80  | 3.90 |
| -6 | 2 | 14  | 26.09  | 1.52 |
| -6 | 2 | 14  | 24.08  | 1.45 |
| -6 | 2 | 14  | 28.03  | 1.82 |
| -6 | 2 | 14  | 26.03  | 1.87 |
| -6 | 2 | 14  | 28.21  | 1.84 |
| -6 | 2 | 14  | 26.76  | 1.78 |
| -6 | 2 | 14  | 30.94  | 2.00 |
| -6 | 2 | 14  | 25.87  | 1.61 |
| -6 | 2 | 14  | 27.67  | 1.89 |
| -6 | 2 | 15  | 256.95 | 4.41 |
| -6 | 2 | 15  | 262.43 | 4.66 |
| -6 | 3 | -11 | 26.51  | 2.86 |
| -6 | 3 | -11 | 23.68  | 1.52 |
| -6 | 3 | -10 | 13.27  | 3.97 |
| -6 | 3 | -10 | 9.35   | 4.30 |
| -6 | 3 | -10 | 9.87   | 1.09 |
| -6 | 3 | -10 | 11.53  | 2.02 |
| -6 | 3 | -10 | 10.72  | 3.55 |
| -6 | 3 | -9  | 92.99  | 2.91 |
| -6 | 3 | -9  | 77.48  | 4.30 |
| -6 | 3 | -9  | 104.02 | 3.61 |
| -6 | 3 | -9  | 96.82  | 2.92 |

## CIF 31

|    |   |    |         |       |
|----|---|----|---------|-------|
| -6 | 3 | -9 | 108.15  | 3.82  |
| -6 | 3 | -9 | 98.51   | 3.33  |
| -6 | 3 | -9 | 96.53   | 3.17  |
| -6 | 3 | -9 | 79.16   | 5.23  |
| -6 | 3 | -9 | 104.61  | 3.97  |
| -6 | 3 | -8 | 42.62   | 2.69  |
| -6 | 3 | -8 | 47.07   | 2.75  |
| -6 | 3 | -8 | 33.16   | 2.82  |
| -6 | 3 | -8 | 45.87   | 2.66  |
| -6 | 3 | -8 | 45.22   | 2.20  |
| -6 | 3 | -8 | 45.38   | 2.33  |
| -6 | 3 | -8 | 43.64   | 2.41  |
| -6 | 3 | -8 | 33.32   | 3.48  |
| -6 | 3 | -8 | 44.61   | 2.63  |
| -6 | 3 | -7 | 26.08   | 2.00  |
| -6 | 3 | -7 | 29.54   | 1.86  |
| -6 | 3 | -7 | 27.17   | 2.07  |
| -6 | 3 | -7 | 28.72   | 2.60  |
| -6 | 3 | -7 | 28.66   | 2.20  |
| -6 | 3 | -7 | 24.66   | 2.97  |
| -6 | 3 | -7 | 26.77   | 2.35  |
| -6 | 3 | -7 | 26.37   | 2.20  |
| -6 | 3 | -7 | 23.73   | 1.99  |
| -6 | 3 | -6 | 2728.44 | 27.07 |
| -6 | 3 | -6 | 2726.29 | 28.22 |
| -6 | 3 | -6 | 2717.32 | 30.50 |
| -6 | 3 | -6 | 2761.94 | 29.05 |
| -6 | 3 | -6 | 2686.05 | 28.34 |
| -6 | 3 | -6 | 2630.70 | 32.03 |
| -6 | 3 | -5 | 52.05   | 2.30  |
| -6 | 3 | -5 | 52.96   | 2.36  |
| -6 | 3 | -5 | 50.40   | 2.70  |
| -6 | 3 | -5 | 48.53   | 2.69  |
| -6 | 3 | -5 | 50.99   | 2.40  |
| -6 | 3 | -5 | 46.35   | 2.97  |
| -6 | 3 | -5 | 47.97   | 2.50  |
| -6 | 3 | -4 | 539.07  | 9.04  |
| -6 | 3 | -4 | 567.10  | 9.40  |
| -6 | 3 | -4 | 558.43  | 9.36  |
| -6 | 3 | -4 | 545.32  | 8.69  |
| -6 | 3 | -4 | 591.42  | 8.47  |

## CIF 31

|    |   |    |        |       |
|----|---|----|--------|-------|
| -6 | 3 | -4 | 496.98 | 8.91  |
| -6 | 3 | -4 | 546.79 | 8.27  |
| -6 | 3 | -4 | 541.06 | 9.94  |
| -6 | 3 | -3 | 255.07 | 6.10  |
| -6 | 3 | -3 | 250.72 | 5.63  |
| -6 | 3 | -3 | 254.89 | 5.66  |
| -6 | 3 | -3 | 254.67 | 5.29  |
| -6 | 3 | -3 | 257.96 | 5.75  |
| -6 | 3 | -2 | 70.16  | 2.08  |
| -6 | 3 | -2 | 76.95  | 2.85  |
| -6 | 3 | -2 | 65.40  | 3.70  |
| -6 | 3 | -2 | 66.98  | 2.86  |
| -6 | 3 | -2 | 71.67  | 3.22  |
| -6 | 3 | -2 | 66.31  | 4.10  |
| -6 | 3 | -2 | 71.87  | 3.23  |
| -6 | 3 | -2 | 72.13  | 2.99  |
| -6 | 3 | -2 | 69.23  | 2.76  |
| -6 | 3 | -2 | 74.01  | 2.84  |
| -6 | 3 | -2 | 73.37  | 2.61  |
| -6 | 3 | -1 | 761.49 | 8.84  |
| -6 | 3 | -1 | 781.21 | 11.25 |
| -6 | 3 | -1 | 746.46 | 10.08 |
| -6 | 3 | -1 | 826.02 | 12.07 |
| -6 | 3 | -1 | 681.33 | 11.38 |
| -6 | 3 | -1 | 734.81 | 10.15 |
| -6 | 3 | -1 | 688.12 | 9.97  |
| -6 | 3 | -1 | 806.12 | 11.76 |
| -6 | 3 | -1 | 757.27 | 10.01 |
| -6 | 3 | 0  | 22.15  | 1.80  |
| -6 | 3 | 0  | 23.74  | 1.91  |
| -6 | 3 | 0  | 27.59  | 2.10  |
| -6 | 3 | 0  | 33.36  | 1.79  |
| -6 | 3 | 0  | 23.54  | 1.91  |
| -6 | 3 | 0  | 30.84  | 2.06  |
| -6 | 3 | 0  | 18.58  | 1.91  |
| -6 | 3 | 0  | 21.80  | 2.05  |
| -6 | 3 | 0  | 31.16  | 1.65  |
| -6 | 3 | 0  | 21.56  | 1.90  |
| -6 | 3 | 0  | 20.29  | 2.05  |
| -6 | 3 | 0  | 26.83  | 1.32  |
| -6 | 3 | 1  | 119.55 | 4.39  |

## CIF 31

|    |   |   |        |      |
|----|---|---|--------|------|
| -6 | 3 | 1 | 144.41 | 4.71 |
| -6 | 3 | 1 | 130.86 | 3.56 |
| -6 | 3 | 1 | 143.73 | 4.42 |
| -6 | 3 | 1 | 134.45 | 4.20 |
| -6 | 3 | 1 | 133.04 | 3.37 |
| -6 | 3 | 1 | 124.66 | 2.78 |
| -6 | 3 | 1 | 131.62 | 4.88 |
| -6 | 3 | 1 | 146.19 | 4.46 |
| -6 | 3 | 1 | 138.57 | 4.72 |
| -6 | 3 | 1 | 147.00 | 4.39 |
| -6 | 3 | 1 | 141.39 | 4.48 |
| -6 | 3 | 2 | 534.87 | 9.72 |
| -6 | 3 | 2 | 616.79 | 9.93 |
| -6 | 3 | 2 | 598.41 | 8.53 |
| -6 | 3 | 2 | 555.80 | 9.69 |
| -6 | 3 | 2 | 581.96 | 7.23 |
| -6 | 3 | 2 | 560.68 | 9.99 |
| -6 | 3 | 2 | 601.60 | 9.94 |
| -6 | 3 | 2 | 578.66 | 9.52 |
| -6 | 3 | 2 | 584.68 | 9.06 |
| -6 | 3 | 2 | 595.62 | 8.42 |
| -6 | 3 | 3 | 141.49 | 3.83 |
| -6 | 3 | 3 | 121.89 | 4.18 |
| -6 | 3 | 3 | 128.92 | 4.18 |
| -6 | 3 | 3 | 127.44 | 4.25 |
| -6 | 3 | 3 | 136.20 | 3.65 |
| -6 | 3 | 3 | 128.89 | 4.00 |
| -6 | 3 | 3 | 132.44 | 4.17 |
| -6 | 3 | 3 | 126.22 | 3.63 |
| -6 | 3 | 3 | 130.63 | 3.66 |
| -6 | 3 | 3 | 121.68 | 4.45 |
| -6 | 3 | 3 | 120.17 | 4.32 |
| -6 | 3 | 3 | 133.24 | 4.41 |
| -6 | 3 | 3 | 131.05 | 3.69 |
| -6 | 3 | 3 | 135.25 | 2.95 |
| -6 | 3 | 3 | 103.42 | 4.44 |
| -6 | 3 | 4 | 13.49  | 1.61 |
| -6 | 3 | 4 | 11.69  | 1.63 |
| -6 | 3 | 4 | 13.29  | 1.33 |
| -6 | 3 | 4 | 13.03  | 0.99 |
| -6 | 3 | 4 | 11.81  | 1.29 |

## CIF 31

|    |   |   |        |      |
|----|---|---|--------|------|
| -6 | 3 | 4 | 13.36  | 1.34 |
| -6 | 3 | 4 | 12.64  | 1.36 |
| -6 | 3 | 4 | 14.19  | 1.19 |
| -6 | 3 | 4 | 13.08  | 1.34 |
| -6 | 3 | 4 | 12.51  | 1.44 |
| -6 | 3 | 4 | 13.31  | 1.64 |
| -6 | 3 | 4 | 14.27  | 1.39 |
| -6 | 3 | 4 | 13.79  | 1.66 |
| -6 | 3 | 4 | 13.55  | 1.49 |
| -6 | 3 | 4 | 14.07  | 1.09 |
| -6 | 3 | 5 | 34.17  | 2.29 |
| -6 | 3 | 5 | 34.21  | 2.35 |
| -6 | 3 | 5 | 33.61  | 2.34 |
| -6 | 3 | 5 | 37.69  | 2.03 |
| -6 | 3 | 5 | 36.48  | 2.06 |
| -6 | 3 | 5 | 34.27  | 2.06 |
| -6 | 3 | 5 | 42.26  | 2.53 |
| -6 | 3 | 5 | 34.67  | 2.16 |
| -6 | 3 | 5 | 31.41  | 2.25 |
| -6 | 3 | 5 | 37.97  | 2.25 |
| -6 | 3 | 5 | 32.93  | 2.01 |
| -6 | 3 | 5 | 32.78  | 1.59 |
| -6 | 3 | 5 | 47.03  | 2.93 |
| -6 | 3 | 5 | 36.63  | 2.38 |
| -6 | 3 | 5 | 38.65  | 2.30 |
| -6 | 3 | 5 | 37.54  | 1.91 |
| -6 | 3 | 6 | 411.36 | 6.57 |
| -6 | 3 | 6 | 383.79 | 8.89 |
| -6 | 3 | 6 | 418.76 | 7.69 |
| -6 | 3 | 6 | 426.41 | 7.68 |
| -6 | 3 | 6 | 409.46 | 8.42 |
| -6 | 3 | 6 | 414.30 | 7.59 |
| -6 | 3 | 6 | 462.59 | 7.77 |
| -6 | 3 | 6 | 378.33 | 7.92 |
| -6 | 3 | 6 | 407.45 | 8.01 |
| -6 | 3 | 6 | 378.94 | 7.94 |
| -6 | 3 | 6 | 408.67 | 8.45 |
| -6 | 3 | 6 | 439.59 | 8.92 |
| -6 | 3 | 6 | 410.64 | 8.66 |
| -6 | 3 | 6 | 413.64 | 8.18 |
| -6 | 3 | 6 | 419.07 | 7.42 |



## CIF 31

|    |   |   |        |      |
|----|---|---|--------|------|
| -6 | 3 | 6 | 386.91 | 7.83 |
| -6 | 3 | 6 | 405.24 | 8.12 |
| -6 | 3 | 7 | 27.86  | 2.04 |
| -6 | 3 | 7 | 26.83  | 2.12 |
| -6 | 3 | 7 | 26.95  | 2.23 |
| -6 | 3 | 7 | 28.72  | 2.09 |
| -6 | 3 | 7 | 29.13  | 2.43 |
| -6 | 3 | 7 | 25.20  | 2.14 |
| -6 | 3 | 7 | 22.83  | 2.27 |
| -6 | 3 | 7 | 26.04  | 1.96 |
| -6 | 3 | 7 | 25.51  | 2.02 |
| -6 | 3 | 7 | 35.30  | 2.11 |
| -6 | 3 | 7 | 27.39  | 2.06 |
| -6 | 3 | 7 | 27.82  | 2.38 |
| -6 | 3 | 7 | 24.35  | 2.20 |
| -6 | 3 | 7 | 24.33  | 2.11 |
| -6 | 3 | 7 | 23.63  | 1.81 |
| -6 | 3 | 7 | 29.42  | 2.39 |
| -6 | 3 | 7 | 29.25  | 2.32 |
| -6 | 3 | 7 | 26.50  | 1.64 |
| -6 | 3 | 8 | 169.07 | 5.27 |
| -6 | 3 | 8 | 162.08 | 4.63 |
| -6 | 3 | 8 | 158.18 | 5.47 |
| -6 | 3 | 8 | 180.09 | 5.81 |
| -6 | 3 | 8 | 167.85 | 5.12 |
| -6 | 3 | 8 | 163.41 | 5.34 |
| -6 | 3 | 8 | 166.56 | 5.25 |
| -6 | 3 | 8 | 153.58 | 5.33 |
| -6 | 3 | 8 | 175.27 | 4.42 |
| -6 | 3 | 8 | 165.10 | 5.55 |
| -6 | 3 | 8 | 150.36 | 5.60 |
| -6 | 3 | 8 | 166.94 | 4.79 |
| -6 | 3 | 8 | 160.48 | 4.93 |
| -6 | 3 | 8 | 166.52 | 5.41 |
| -6 | 3 | 9 | 388.32 | 9.09 |
| -6 | 3 | 9 | 401.84 | 9.07 |
| -6 | 3 | 9 | 417.50 | 9.26 |
| -6 | 3 | 9 | 405.63 | 9.01 |
| -6 | 3 | 9 | 420.86 | 8.09 |
| -6 | 3 | 9 | 422.55 | 7.60 |
| -6 | 3 | 9 | 401.01 | 8.83 |

## CIF 31

|    |   |    |        |       |
|----|---|----|--------|-------|
| -6 | 3 | 9  | 404.73 | 9.23  |
| -6 | 3 | 9  | 410.66 | 9.59  |
| -6 | 3 | 9  | 420.49 | 8.76  |
| -6 | 3 | 9  | 412.91 | 7.70  |
| -6 | 3 | 9  | 416.65 | 9.36  |
| -6 | 3 | 9  | 408.48 | 9.17  |
| -6 | 3 | 9  | 397.67 | 8.43  |
| -6 | 3 | 10 | 23.29  | 1.87  |
| -6 | 3 | 10 | 19.35  | 1.61  |
| -6 | 3 | 10 | 18.77  | 2.10  |
| -6 | 3 | 10 | 20.88  | 2.23  |
| -6 | 3 | 10 | 21.63  | 2.24  |
| -6 | 3 | 10 | 21.73  | 2.22  |
| -6 | 3 | 10 | 19.43  | 1.87  |
| -6 | 3 | 10 | 20.17  | 2.28  |
| -6 | 3 | 10 | 23.55  | 2.43  |
| -6 | 3 | 10 | 24.43  | 2.26  |
| -6 | 3 | 10 | 21.99  | 1.71  |
| -6 | 3 | 10 | 23.04  | 2.39  |
| -6 | 3 | 10 | 25.83  | 2.31  |
| -6 | 3 | 10 | 21.27  | 2.28  |
| -6 | 3 | 11 | 232.72 | 6.78  |
| -6 | 3 | 11 | 237.77 | 6.46  |
| -6 | 3 | 11 | 233.54 | 6.81  |
| -6 | 3 | 11 | 227.04 | 6.56  |
| -6 | 3 | 11 | 244.82 | 6.14  |
| -6 | 3 | 11 | 224.87 | 6.09  |
| -6 | 3 | 11 | 230.89 | 5.53  |
| -6 | 3 | 11 | 227.13 | 6.87  |
| -6 | 3 | 11 | 220.73 | 6.16  |
| -6 | 3 | 11 | 237.44 | 6.55  |
| -6 | 3 | 12 | 3.76   | 1.11  |
| -6 | 3 | 12 | 3.72   | 1.12  |
| -6 | 3 | 12 | 3.87   | 1.19  |
| -6 | 3 | 12 | 1.98   | 0.93  |
| -6 | 3 | 12 | 3.23   | 0.95  |
| -6 | 3 | 12 | 3.08   | 1.21  |
| -6 | 3 | 12 | 2.99   | 1.30  |
| -6 | 3 | 12 | 2.89   | 1.46  |
| -6 | 3 | 12 | 3.50   | 1.14  |
| -6 | 3 | 13 | 686.40 | 10.69 |

## CIF 31

|    |   |     |        |       |
|----|---|-----|--------|-------|
| -6 | 3 | 13  | 692.01 | 11.02 |
| -6 | 3 | 13  | 717.26 | 10.74 |
| -6 | 3 | 13  | 686.19 | 11.08 |
| -6 | 3 | 13  | 690.24 | 10.85 |
| -6 | 3 | 13  | 694.76 | 11.02 |
| -6 | 3 | 14  | 151.37 | 3.57  |
| -6 | 3 | 14  | 168.84 | 4.11  |
| -6 | 3 | 14  | 174.34 | 4.27  |
| -6 | 3 | 14  | 156.09 | 3.32  |
| -6 | 3 | 14  | 160.57 | 4.12  |
| -6 | 3 | 14  | 163.73 | 3.92  |
| -6 | 3 | 14  | 171.65 | 4.25  |
| -6 | 3 | 14  | 165.24 | 3.93  |
| -6 | 4 | -11 | 34.46  | 2.28  |
| -6 | 4 | -11 | 29.22  | 1.43  |
| -6 | 4 | -10 | 40.22  | 4.08  |
| -6 | 4 | -10 | 30.06  | 2.76  |
| -6 | 4 | -10 | 35.48  | 4.16  |
| -6 | 4 | -10 | 39.71  | 2.12  |
| -6 | 4 | -10 | 38.86  | 1.95  |
| -6 | 4 | -9  | 134.43 | 4.37  |
| -6 | 4 | -9  | 122.91 | 3.67  |
| -6 | 4 | -9  | 147.29 | 4.47  |
| -6 | 4 | -9  | 132.49 | 4.22  |
| -6 | 4 | -9  | 112.77 | 4.40  |
| -6 | 4 | -8  | 15.75  | 5.32  |
| -6 | 4 | -8  | 13.11  | 1.69  |
| -6 | 4 | -8  | 11.55  | 1.50  |
| -6 | 4 | -8  | 11.57  | 1.55  |
| -6 | 4 | -8  | 20.76  | 2.16  |
| -6 | 4 | -8  | 9.82   | 1.43  |
| -6 | 4 | -8  | 13.77  | 1.83  |
| -6 | 4 | -8  | 13.22  | 1.81  |
| -6 | 4 | -7  | 101.79 | 3.74  |
| -6 | 4 | -7  | 101.64 | 3.84  |
| -6 | 4 | -7  | 98.73  | 3.53  |
| -6 | 4 | -7  | 103.01 | 3.87  |
| -6 | 4 | -7  | 110.12 | 6.03  |
| -6 | 4 | -7  | 98.10  | 3.97  |
| -6 | 4 | -7  | 106.53 | 4.17  |
| -6 | 4 | -7  | 98.66  | 3.89  |

## CIF 31

|    |   |    |         |       |
|----|---|----|---------|-------|
| -6 | 4 | -6 | 8.37    | 1.49  |
| -6 | 4 | -6 | 8.70    | 1.45  |
| -6 | 4 | -6 | 10.03   | 1.30  |
| -6 | 4 | -6 | 9.63    | 1.46  |
| -6 | 4 | -6 | 11.63   | 3.67  |
| -6 | 4 | -5 | 178.03  | 5.17  |
| -6 | 4 | -5 | 180.37  | 7.02  |
| -6 | 4 | -5 | 184.47  | 4.58  |
| -6 | 4 | -5 | 178.54  | 4.84  |
| -6 | 4 | -5 | 165.13  | 4.94  |
| -6 | 4 | -5 | 188.79  | 5.18  |
| -6 | 4 | -4 | 2308.09 | 24.84 |
| -6 | 4 | -4 | 2380.71 | 23.52 |
| -6 | 4 | -4 | 2259.52 | 28.21 |
| -6 | 4 | -4 | 2254.44 | 24.70 |
| -6 | 4 | -4 | 2132.70 | 28.29 |
| -6 | 4 | -4 | 2240.78 | 24.64 |
| -6 | 4 | -4 | 2407.26 | 24.55 |
| -6 | 4 | -4 | 2365.58 | 25.05 |
| -6 | 4 | -3 | 257.46  | 7.64  |
| -6 | 4 | -3 | 275.63  | 5.94  |
| -6 | 4 | -3 | 269.88  | 5.83  |
| -6 | 4 | -3 | 245.15  | 6.21  |
| -6 | 4 | -3 | 276.88  | 4.90  |
| -6 | 4 | -3 | 283.03  | 5.70  |
| -6 | 4 | -3 | 284.46  | 6.01  |
| -6 | 4 | -3 | 263.51  | 5.81  |
| -6 | 4 | -2 | 1839.47 | 20.16 |
| -6 | 4 | -2 | 1824.39 | 20.21 |
| -6 | 4 | -2 | 1962.05 | 20.37 |
| -6 | 4 | -2 | 1926.21 | 21.45 |
| -6 | 4 | -2 | 1933.34 | 20.39 |
| -6 | 4 | -2 | 1897.44 | 20.37 |
| -6 | 4 | -2 | 1839.04 | 18.79 |
| -6 | 4 | -2 | 1754.53 | 23.04 |
| -6 | 4 | -1 | 1758.40 | 18.75 |
| -6 | 4 | -1 | 1734.36 | 19.79 |
| -6 | 4 | -1 | 1778.99 | 20.40 |
| -6 | 4 | -1 | 1814.22 | 19.72 |
| -6 | 4 | -1 | 1770.48 | 18.82 |
| -6 | 4 | -1 | 1762.42 | 20.16 |

## CIF 31

|    |   |    |         |       |
|----|---|----|---------|-------|
| -6 | 4 | -1 | 1817.54 | 17.83 |
| -6 | 4 | -1 | 1668.27 | 18.47 |
| -6 | 4 | -1 | 1724.43 | 21.31 |
| -6 | 4 | -1 | 1638.13 | 21.82 |
| -6 | 4 | -1 | 1695.78 | 20.27 |
| -6 | 4 | -1 | 1686.11 | 22.11 |
| -6 | 4 | -1 | 1735.52 | 20.61 |
| -6 | 4 | -1 | 1707.76 | 18.48 |
| -6 | 4 | 0  | 748.07  | 12.14 |
| -6 | 4 | 0  | 696.62  | 9.80  |
| -6 | 4 | 0  | 817.40  | 13.03 |
| -6 | 4 | 0  | 821.51  | 10.70 |
| -6 | 4 | 0  | 707.04  | 12.57 |
| -6 | 4 | 0  | 743.73  | 9.77  |
| -6 | 4 | 0  | 781.96  | 11.47 |
| -6 | 4 | 0  | 765.41  | 11.01 |
| -6 | 4 | 0  | 750.86  | 9.46  |
| -6 | 4 | 0  | 765.00  | 9.44  |
| -6 | 4 | 0  | 764.96  | 11.19 |
| -6 | 4 | 0  | 728.14  | 12.12 |
| -6 | 4 | 0  | 791.60  | 11.90 |
| -6 | 4 | 0  | 784.76  | 11.83 |
| -6 | 4 | 0  | 782.66  | 11.51 |
| -6 | 4 | 1  | 1160.92 | 15.22 |
| -6 | 4 | 1  | 1182.70 | 15.72 |
| -6 | 4 | 1  | 1131.21 | 16.73 |
| -6 | 4 | 1  | 1042.41 | 15.34 |
| -6 | 4 | 1  | 1196.63 | 15.29 |
| -6 | 4 | 1  | 1107.49 | 13.11 |
| -6 | 4 | 1  | 1165.36 | 16.18 |
| -6 | 4 | 1  | 1281.90 | 14.35 |
| -6 | 4 | 1  | 1164.07 | 15.87 |
| -6 | 4 | 1  | 1171.38 | 12.90 |
| -6 | 4 | 1  | 1141.95 | 14.90 |
| -6 | 4 | 1  | 1211.42 | 15.75 |
| -6 | 4 | 1  | 1144.38 | 13.96 |
| -6 | 4 | 1  | 1160.38 | 15.44 |
| -6 | 4 | 2  | 3.43    | 1.03  |
| -6 | 4 | 2  | 1.93    | 0.63  |
| -6 | 4 | 2  | 1.77    | 0.91  |
| -6 | 4 | 2  | 1.53    | 0.82  |

## CIF 31

|    |   |   |        |      |
|----|---|---|--------|------|
| -6 | 4 | 2 | 3.37   | 1.08 |
| -6 | 4 | 2 | 2.68   | 1.02 |
| -6 | 4 | 2 | 3.40   | 0.69 |
| -6 | 4 | 2 | 2.40   | 0.85 |
| -6 | 4 | 2 | 1.75   | 0.75 |
| -6 | 4 | 2 | 1.51   | 0.94 |
| -6 | 4 | 2 | 1.69   | 0.87 |
| -6 | 4 | 2 | 1.53   | 0.97 |
| -6 | 4 | 3 | 151.23 | 4.04 |
| -6 | 4 | 3 | 122.04 | 4.20 |
| -6 | 4 | 3 | 134.64 | 4.65 |
| -6 | 4 | 3 | 129.46 | 5.01 |
| -6 | 4 | 3 | 145.69 | 4.93 |
| -6 | 4 | 3 | 136.87 | 3.75 |
| -6 | 4 | 3 | 128.26 | 4.45 |
| -6 | 4 | 3 | 141.67 | 3.96 |
| -6 | 4 | 3 | 143.33 | 4.46 |
| -6 | 4 | 3 | 143.26 | 4.58 |
| -6 | 4 | 3 | 146.18 | 4.26 |
| -6 | 4 | 3 | 140.20 | 3.41 |
| -6 | 4 | 3 | 147.12 | 3.90 |
| -6 | 4 | 3 | 152.47 | 4.61 |
| -6 | 4 | 3 | 137.25 | 3.77 |
| -6 | 4 | 3 | 147.11 | 4.72 |
| -6 | 4 | 3 | 127.57 | 4.43 |
| -6 | 4 | 4 | 94.91  | 3.86 |
| -6 | 4 | 4 | 85.19  | 2.73 |
| -6 | 4 | 4 | 84.43  | 2.99 |
| -6 | 4 | 4 | 86.80  | 3.67 |
| -6 | 4 | 4 | 91.96  | 3.57 |
| -6 | 4 | 4 | 88.54  | 3.74 |
| -6 | 4 | 4 | 88.67  | 3.18 |
| -6 | 4 | 4 | 88.52  | 3.64 |
| -6 | 4 | 4 | 93.56  | 3.27 |
| -6 | 4 | 4 | 78.84  | 3.24 |
| -6 | 4 | 4 | 92.48  | 3.27 |
| -6 | 4 | 4 | 101.36 | 3.82 |
| -6 | 4 | 4 | 84.75  | 3.66 |
| -6 | 4 | 4 | 86.92  | 3.18 |
| -6 | 4 | 4 | 80.56  | 4.00 |
| -6 | 4 | 5 | 45.15  | 2.45 |

## CIF 31

|    |   |   |        |      |
|----|---|---|--------|------|
| -6 | 4 | 5 | 43.08  | 2.01 |
| -6 | 4 | 5 | 43.57  | 2.69 |
| -6 | 4 | 5 | 43.68  | 2.27 |
| -6 | 4 | 5 | 40.96  | 2.59 |
| -6 | 4 | 5 | 46.31  | 2.99 |
| -6 | 4 | 5 | 46.04  | 2.73 |
| -6 | 4 | 5 | 44.54  | 2.19 |
| -6 | 4 | 5 | 47.12  | 2.90 |
| -6 | 4 | 5 | 42.99  | 2.80 |
| -6 | 4 | 5 | 42.58  | 2.41 |
| -6 | 4 | 5 | 41.78  | 2.15 |
| -6 | 4 | 5 | 38.07  | 2.85 |
| -6 | 4 | 5 | 46.78  | 2.82 |
| -6 | 4 | 5 | 49.70  | 2.16 |
| -6 | 4 | 6 | 105.32 | 4.56 |
| -6 | 4 | 6 | 108.29 | 4.23 |
| -6 | 4 | 6 | 110.11 | 3.51 |
| -6 | 4 | 6 | 103.99 | 4.03 |
| -6 | 4 | 6 | 111.77 | 3.41 |
| -6 | 4 | 6 | 105.74 | 4.07 |
| -6 | 4 | 6 | 100.27 | 4.31 |
| -6 | 4 | 6 | 106.50 | 3.51 |
| -6 | 4 | 6 | 112.91 | 4.19 |
| -6 | 4 | 6 | 102.70 | 3.54 |
| -6 | 4 | 6 | 97.31  | 4.17 |
| -6 | 4 | 6 | 109.27 | 4.33 |
| -6 | 4 | 6 | 101.96 | 4.16 |
| -6 | 4 | 7 | 24.41  | 2.10 |
| -6 | 4 | 7 | 25.91  | 1.75 |
| -6 | 4 | 7 | 24.47  | 2.43 |
| -6 | 4 | 7 | 23.93  | 1.94 |
| -6 | 4 | 7 | 27.15  | 2.28 |
| -6 | 4 | 7 | 24.92  | 2.43 |
| -6 | 4 | 7 | 24.30  | 1.80 |
| -6 | 4 | 7 | 25.21  | 2.45 |
| -6 | 4 | 7 | 26.45  | 2.39 |
| -6 | 4 | 7 | 25.72  | 1.73 |
| -6 | 4 | 7 | 25.62  | 2.02 |
| -6 | 4 | 7 | 24.64  | 2.21 |
| -6 | 4 | 7 | 26.06  | 1.98 |
| -6 | 4 | 7 | 24.37  | 2.20 |

## CIF 31

|    |   |    |        |      |
|----|---|----|--------|------|
| -6 | 4 | 8  | 386.19 | 9.17 |
| -6 | 4 | 8  | 391.03 | 7.06 |
| -6 | 4 | 8  | 342.79 | 7.08 |
| -6 | 4 | 8  | 363.73 | 8.58 |
| -6 | 4 | 8  | 421.68 | 8.17 |
| -6 | 4 | 8  | 358.02 | 8.81 |
| -6 | 4 | 8  | 361.19 | 7.78 |
| -6 | 4 | 8  | 375.10 | 8.99 |
| -6 | 4 | 8  | 395.46 | 7.34 |
| -6 | 4 | 8  | 391.52 | 9.06 |
| -6 | 4 | 8  | 375.00 | 8.20 |
| -6 | 4 | 8  | 386.78 | 8.64 |
| -6 | 4 | 8  | 385.63 | 8.90 |
| -6 | 4 | 8  | 383.98 | 8.01 |
| -6 | 4 | 9  | 79.81  | 3.16 |
| -6 | 4 | 9  | 84.76  | 3.77 |
| -6 | 4 | 9  | 76.30  | 4.02 |
| -6 | 4 | 9  | 78.51  | 3.76 |
| -6 | 4 | 9  | 89.86  | 3.69 |
| -6 | 4 | 9  | 80.34  | 4.08 |
| -6 | 4 | 9  | 82.59  | 4.25 |
| -6 | 4 | 9  | 87.00  | 3.34 |
| -6 | 4 | 9  | 74.32  | 4.01 |
| -6 | 4 | 9  | 80.84  | 4.03 |
| -6 | 4 | 9  | 75.21  | 3.43 |
| -6 | 4 | 10 | 12.75  | 1.96 |
| -6 | 4 | 10 | 9.96   | 1.59 |
| -6 | 4 | 10 | 9.89   | 1.30 |
| -6 | 4 | 10 | 8.72   | 1.38 |
| -6 | 4 | 10 | 10.91  | 1.92 |
| -6 | 4 | 10 | 11.76  | 1.80 |
| -6 | 4 | 10 | 11.48  | 1.75 |
| -6 | 4 | 10 | 11.98  | 1.76 |
| -6 | 4 | 10 | 9.05   | 1.35 |
| -6 | 4 | 10 | 10.94  | 1.74 |
| -6 | 4 | 10 | 10.57  | 1.76 |
| -6 | 4 | 10 | 8.04   | 1.87 |
| -6 | 4 | 11 | 68.72  | 3.57 |
| -6 | 4 | 11 | 80.42  | 3.92 |
| -6 | 4 | 11 | 71.98  | 3.53 |
| -6 | 4 | 11 | 76.01  | 3.75 |



## CIF 31

|    |   |     |        |      |
|----|---|-----|--------|------|
| -6 | 4 | 11  | 72.65  | 3.60 |
| -6 | 4 | 11  | 71.92  | 3.24 |
| -6 | 4 | 11  | 71.86  | 3.03 |
| -6 | 4 | 11  | 70.69  | 3.76 |
| -6 | 4 | 11  | 73.52  | 3.80 |
| -6 | 4 | 11  | 78.05  | 3.83 |
| -6 | 4 | 11  | 68.31  | 3.44 |
| -6 | 4 | 12  | 386.09 | 7.91 |
| -6 | 4 | 12  | 400.29 | 8.26 |
| -6 | 4 | 12  | 404.39 | 8.36 |
| -6 | 4 | 12  | 378.23 | 7.74 |
| -6 | 4 | 12  | 408.84 | 8.02 |
| -6 | 4 | 12  | 404.80 | 7.40 |
| -6 | 4 | 12  | 396.84 | 8.30 |
| -6 | 4 | 12  | 383.48 | 8.35 |
| -6 | 4 | 12  | 392.85 | 7.75 |
| -6 | 4 | 12  | 381.66 | 7.25 |
| -6 | 4 | 13  | 285.99 | 6.20 |
| -6 | 4 | 13  | 250.49 | 5.04 |
| -6 | 4 | 13  | 284.92 | 5.97 |
| -6 | 4 | 13  | 292.03 | 6.14 |
| -6 | 4 | 13  | 289.70 | 5.73 |
| -6 | 4 | 13  | 237.78 | 5.71 |
| -6 | 4 | 14  | 61.98  | 2.22 |
| -6 | 4 | 14  | 59.15  | 2.15 |
| -6 | 5 | -11 | 0.60   | 0.92 |
| -6 | 5 | -11 | 0.91   | 2.20 |
| -6 | 5 | -11 | 1.14   | 0.55 |
| -6 | 5 | -10 | 12.17  | 1.37 |
| -6 | 5 | -10 | 12.29  | 1.61 |
| -6 | 5 | -10 | 13.42  | 4.12 |
| -6 | 5 | -10 | 8.87   | 3.58 |
| -6 | 5 | -10 | 9.85   | 2.22 |
| -6 | 5 | -9  | 135.88 | 3.99 |
| -6 | 5 | -9  | 143.80 | 4.43 |
| -6 | 5 | -9  | 134.80 | 4.45 |
| -6 | 5 | -9  | 122.31 | 3.96 |
| -6 | 5 | -9  | 136.69 | 4.36 |
| -6 | 5 | -9  | 116.14 | 4.32 |
| -6 | 5 | -8  | 331.76 | 7.10 |
| -6 | 5 | -8  | 327.53 | 6.59 |

## CIF 31

|    |   |    |         |       |
|----|---|----|---------|-------|
| -6 | 5 | -8 | 339.58  | 7.18  |
| -6 | 5 | -8 | 351.75  | 7.56  |
| -6 | 5 | -8 | 347.35  | 7.02  |
| -6 | 5 | -7 | 1295.30 | 16.30 |
| -6 | 5 | -7 | 1160.08 | 15.12 |
| -6 | 5 | -7 | 1231.08 | 16.19 |
| -6 | 5 | -7 | 1212.18 | 16.13 |
| -6 | 5 | -7 | 1270.15 | 16.44 |
| -6 | 5 | -6 | 322.53  | 6.53  |
| -6 | 5 | -6 | 347.75  | 7.58  |
| -6 | 5 | -6 | 325.03  | 7.16  |
| -6 | 5 | -6 | 331.33  | 7.20  |
| -6 | 5 | -5 | 44.54   | 3.46  |
| -6 | 5 | -5 | 50.23   | 2.68  |
| -6 | 5 | -5 | 44.39   | 2.58  |
| -6 | 5 | -5 | 43.81   | 2.24  |
| -6 | 5 | -5 | 40.87   | 2.56  |
| -6 | 5 | -4 | 3.67    | 1.08  |
| -6 | 5 | -4 | 7.46    | 1.86  |
| -6 | 5 | -4 | 3.19    | 0.78  |
| -6 | 5 | -4 | 3.63    | 1.06  |
| -6 | 5 | -4 | 3.53    | 1.07  |
| -6 | 5 | -4 | 3.38    | 1.13  |
| -6 | 5 | -4 | 8.14    | 1.57  |
| -6 | 5 | -4 | 4.68    | 0.86  |
| -6 | 5 | -3 | 9.65    | 1.86  |
| -6 | 5 | -3 | 7.69    | 1.19  |
| -6 | 5 | -3 | 7.22    | 1.21  |
| -6 | 5 | -3 | 7.40    | 1.59  |
| -6 | 5 | -3 | 7.91    | 1.68  |
| -6 | 5 | -3 | 8.79    | 1.22  |
| -6 | 5 | -3 | 8.41    | 1.03  |
| -6 | 5 | -3 | 8.26    | 1.24  |
| -6 | 5 | -2 | 250.01  | 5.45  |
| -6 | 5 | -2 | 218.07  | 6.76  |
| -6 | 5 | -2 | 258.92  | 5.40  |
| -6 | 5 | -2 | 245.80  | 5.25  |
| -6 | 5 | -2 | 226.49  | 4.72  |
| -6 | 5 | -2 | 211.45  | 6.52  |
| -6 | 5 | -2 | 264.48  | 5.57  |
| -6 | 5 | -2 | 246.15  | 6.02  |

## CIF 31

|    |   |    |         |       |
|----|---|----|---------|-------|
| -6 | 5 | -2 | 221.72  | 6.29  |
| -6 | 5 | -1 | 1007.08 | 15.04 |
| -6 | 5 | -1 | 1031.43 | 16.01 |
| -6 | 5 | -1 | 994.34  | 12.67 |
| -6 | 5 | -1 | 1037.21 | 13.88 |
| -6 | 5 | -1 | 1067.28 | 12.72 |
| -6 | 5 | -1 | 1031.04 | 12.71 |
| -6 | 5 | -1 | 1020.88 | 15.89 |
| -6 | 5 | -1 | 999.62  | 12.53 |
| -6 | 5 | -1 | 1072.58 | 12.35 |
| -6 | 5 | -1 | 1012.84 | 13.44 |
| -6 | 5 | -1 | 1015.83 | 14.20 |
| -6 | 5 | -1 | 960.52  | 14.27 |
| -6 | 5 | 0  | 0.72    | 0.62  |
| -6 | 5 | 0  | 0.68    | 0.87  |
| -6 | 5 | 0  | 0.33    | 0.76  |
| -6 | 5 | 0  | 0.88    | 0.96  |
| -6 | 5 | 0  | 1.03    | 0.98  |
| -6 | 5 | 0  | 2.24    | 0.92  |
| -6 | 5 | 0  | 0.43    | 1.06  |
| -6 | 5 | 0  | 0.07    | 0.57  |
| -6 | 5 | 0  | 0.42    | 1.03  |
| -6 | 5 | 0  | -0.11   | 0.76  |
| -6 | 5 | 0  | 0.91    | 1.05  |
| -6 | 5 | 0  | -0.35   | 1.06  |
| -6 | 5 | 0  | 1.18    | 0.64  |
| -6 | 5 | 0  | 0.04    | 0.91  |
| -6 | 5 | 0  | 1.24    | 0.69  |
| -6 | 5 | 1  | 212.34  | 5.04  |
| -6 | 5 | 1  | 221.12  | 5.28  |
| -6 | 5 | 1  | 218.76  | 5.71  |
| -6 | 5 | 1  | 216.38  | 6.06  |
| -6 | 5 | 1  | 222.58  | 4.75  |
| -6 | 5 | 1  | 235.71  | 6.16  |
| -6 | 5 | 1  | 225.90  | 5.66  |
| -6 | 5 | 1  | 218.29  | 4.46  |
| -6 | 5 | 1  | 217.77  | 6.63  |
| -6 | 5 | 1  | 231.29  | 5.97  |
| -6 | 5 | 1  | 227.73  | 5.96  |
| -6 | 5 | 1  | 224.59  | 6.19  |
| -6 | 5 | 1  | 221.99  | 6.12  |

## CIF 31

|    |   |   |        |      |
|----|---|---|--------|------|
| -6 | 5 | 2 | 200.09 | 6.32 |
| -6 | 5 | 2 | 194.47 | 5.52 |
| -6 | 5 | 2 | 192.96 | 4.75 |
| -6 | 5 | 2 | 197.79 | 5.80 |
| -6 | 5 | 2 | 177.61 | 5.37 |
| -6 | 5 | 2 | 186.07 | 4.35 |
| -6 | 5 | 2 | 190.26 | 5.11 |
| -6 | 5 | 2 | 202.65 | 5.47 |
| -6 | 5 | 2 | 187.27 | 5.58 |
| -6 | 5 | 2 | 213.33 | 5.83 |
| -6 | 5 | 2 | 190.01 | 5.56 |
| -6 | 5 | 2 | 187.91 | 5.35 |
| -6 | 5 | 3 | 95.25  | 4.02 |
| -6 | 5 | 3 | 88.73  | 3.91 |
| -6 | 5 | 3 | 101.61 | 3.83 |
| -6 | 5 | 3 | 90.83  | 3.74 |
| -6 | 5 | 3 | 89.92  | 3.87 |
| -6 | 5 | 3 | 98.39  | 4.21 |
| -6 | 5 | 3 | 99.11  | 4.44 |
| -6 | 5 | 3 | 105.77 | 3.25 |
| -6 | 5 | 3 | 97.63  | 3.89 |
| -6 | 5 | 3 | 90.21  | 3.66 |
| -6 | 5 | 3 | 96.36  | 3.52 |
| -6 | 5 | 3 | 97.23  | 3.95 |
| -6 | 5 | 3 | 99.79  | 3.13 |
| -6 | 5 | 4 | 401.40 | 8.57 |
| -6 | 5 | 4 | 406.04 | 8.11 |
| -6 | 5 | 4 | 398.91 | 8.37 |
| -6 | 5 | 4 | 409.05 | 7.48 |
| -6 | 5 | 4 | 422.13 | 8.81 |
| -6 | 5 | 4 | 399.71 | 8.66 |
| -6 | 5 | 4 | 408.65 | 8.07 |
| -6 | 5 | 4 | 436.40 | 7.31 |
| -6 | 5 | 4 | 418.79 | 8.53 |
| -6 | 5 | 4 | 434.89 | 8.95 |
| -6 | 5 | 4 | 421.04 | 9.67 |
| -6 | 5 | 4 | 416.57 | 7.70 |
| -6 | 5 | 5 | 187.13 | 5.92 |
| -6 | 5 | 5 | 186.70 | 5.20 |
| -6 | 5 | 5 | 179.58 | 5.62 |
| -6 | 5 | 5 | 192.54 | 4.78 |

## CIF 31

|    |   |   |        |      |
|----|---|---|--------|------|
| -6 | 5 | 5 | 198.35 | 5.99 |
| -6 | 5 | 5 | 167.13 | 5.47 |
| -6 | 5 | 5 | 182.82 | 5.40 |
| -6 | 5 | 5 | 187.11 | 5.01 |
| -6 | 5 | 5 | 178.68 | 5.63 |
| -6 | 5 | 5 | 194.93 | 5.62 |
| -6 | 5 | 5 | 191.70 | 6.02 |
| -6 | 5 | 5 | 182.95 | 6.15 |
| -6 | 5 | 5 | 190.95 | 4.69 |
| -6 | 5 | 5 | 187.71 | 6.23 |
| -6 | 5 | 5 | 185.13 | 4.46 |
| -6 | 5 | 6 | 119.08 | 4.33 |
| -6 | 5 | 6 | 118.66 | 4.61 |
| -6 | 5 | 6 | 100.52 | 4.49 |
| -6 | 5 | 6 | 104.28 | 3.29 |
| -6 | 5 | 6 | 113.11 | 3.97 |
| -6 | 5 | 6 | 110.61 | 4.47 |
| -6 | 5 | 6 | 113.90 | 3.63 |
| -6 | 5 | 6 | 116.30 | 4.89 |
| -6 | 5 | 6 | 119.44 | 4.78 |
| -6 | 5 | 6 | 115.26 | 4.74 |
| -6 | 5 | 6 | 103.15 | 4.33 |
| -6 | 5 | 6 | 110.30 | 4.59 |
| -6 | 5 | 6 | 116.34 | 3.76 |
| -6 | 5 | 6 | 115.40 | 4.18 |
| -6 | 5 | 7 | 16.27  | 1.68 |
| -6 | 5 | 7 | 11.78  | 2.04 |
| -6 | 5 | 7 | 15.93  | 1.94 |
| -6 | 5 | 7 | 14.94  | 2.11 |
| -6 | 5 | 7 | 11.52  | 1.63 |
| -6 | 5 | 7 | 14.52  | 1.50 |
| -6 | 5 | 7 | 12.57  | 1.83 |
| -6 | 5 | 7 | 14.53  | 2.13 |
| -6 | 5 | 7 | 12.05  | 1.42 |
| -6 | 5 | 7 | 15.33  | 1.97 |
| -6 | 5 | 7 | 13.07  | 1.33 |
| -6 | 5 | 7 | 12.58  | 1.82 |
| -6 | 5 | 8 | 442.29 | 8.47 |
| -6 | 5 | 8 | 457.13 | 8.32 |
| -6 | 5 | 8 | 421.81 | 9.59 |
| -6 | 5 | 8 | 356.27 | 8.14 |

## CIF 31

|    |   |    |        |       |
|----|---|----|--------|-------|
| -6 | 5 | 8  | 442.25 | 9.97  |
| -6 | 5 | 8  | 396.25 | 9.15  |
| -6 | 5 | 8  | 428.44 | 9.85  |
| -6 | 5 | 8  | 453.42 | 10.18 |
| -6 | 5 | 8  | 380.77 | 8.70  |
| -6 | 5 | 8  | 434.76 | 9.37  |
| -6 | 5 | 8  | 424.85 | 8.41  |
| -6 | 5 | 9  | 155.40 | 5.68  |
| -6 | 5 | 9  | 177.56 | 6.16  |
| -6 | 5 | 9  | 170.14 | 5.08  |
| -6 | 5 | 9  | 166.12 | 5.95  |
| -6 | 5 | 9  | 168.14 | 5.27  |
| -6 | 5 | 9  | 171.87 | 4.96  |
| -6 | 5 | 9  | 178.01 | 5.97  |
| -6 | 5 | 9  | 163.44 | 5.92  |
| -6 | 5 | 9  | 165.84 | 5.94  |
| -6 | 5 | 9  | 163.24 | 5.23  |
| -6 | 5 | 9  | 164.88 | 5.58  |
| -6 | 5 | 10 | 139.74 | 5.31  |
| -6 | 5 | 10 | 152.66 | 5.44  |
| -6 | 5 | 10 | 138.69 | 4.48  |
| -6 | 5 | 10 | 145.74 | 5.36  |
| -6 | 5 | 10 | 134.59 | 4.73  |
| -6 | 5 | 10 | 145.83 | 5.34  |
| -6 | 5 | 10 | 143.42 | 4.84  |
| -6 | 5 | 10 | 145.59 | 5.10  |
| -6 | 5 | 10 | 154.14 | 4.63  |
| -6 | 5 | 11 | 714.80 | 12.04 |
| -6 | 5 | 11 | 685.79 | 11.30 |
| -6 | 5 | 11 | 695.80 | 11.71 |
| -6 | 5 | 11 | 640.72 | 10.05 |
| -6 | 5 | 11 | 720.65 | 11.16 |
| -6 | 5 | 11 | 653.60 | 11.36 |
| -6 | 5 | 11 | 646.00 | 11.31 |
| -6 | 5 | 11 | 674.28 | 11.76 |
| -6 | 5 | 11 | 644.95 | 11.34 |
| -6 | 5 | 12 | 133.82 | 4.36  |
| -6 | 5 | 12 | 131.53 | 4.34  |
| -6 | 5 | 12 | 128.56 | 3.81  |
| -6 | 5 | 12 | 125.08 | 4.10  |
| -6 | 5 | 12 | 122.33 | 3.73  |

## CIF 31

|    |   |     |        |       |
|----|---|-----|--------|-------|
| -6 | 5 | 12  | 136.39 | 4.21  |
| -6 | 5 | 12  | 125.32 | 4.24  |
| -6 | 5 | 12  | 130.45 | 4.31  |
| -6 | 5 | 12  | 126.07 | 4.05  |
| -6 | 5 | 13  | 775.99 | 10.13 |
| -6 | 5 | 13  | 757.20 | 10.04 |
| -6 | 6 | -11 | 155.12 | 3.36  |
| -6 | 6 | -11 | 171.04 | 3.37  |
| -6 | 6 | -10 | 149.09 | 4.29  |
| -6 | 6 | -10 | 127.22 | 3.92  |
| -6 | 6 | -9  | 269.95 | 6.06  |
| -6 | 6 | -9  | 257.34 | 5.81  |
| -6 | 6 | -9  | 263.05 | 6.39  |
| -6 | 6 | -9  | 253.35 | 5.39  |
| -6 | 6 | -9  | 271.84 | 6.01  |
| -6 | 6 | -8  | 12.09  | 1.56  |
| -6 | 6 | -8  | 12.42  | 1.40  |
| -6 | 6 | -8  | 13.44  | 1.73  |
| -6 | 6 | -8  | 13.38  | 1.68  |
| -6 | 6 | -8  | 13.87  | 1.80  |
| -6 | 6 | -7  | 940.99 | 13.28 |
| -6 | 6 | -7  | 941.90 | 12.70 |
| -6 | 6 | -7  | 971.75 | 13.64 |
| -6 | 6 | -7  | 961.25 | 13.84 |
| -6 | 6 | -7  | 939.18 | 13.43 |
| -6 | 6 | -6  | 1.30   | 1.18  |
| -6 | 6 | -6  | 0.95   | 0.84  |
| -6 | 6 | -6  | 3.25   | 1.28  |
| -6 | 6 | -6  | 1.09   | 1.03  |
| -6 | 6 | -6  | 1.72   | 1.52  |
| -6 | 6 | -6  | 1.80   | 1.14  |
| -6 | 6 | -5  | 130.84 | 3.89  |
| -6 | 6 | -5  | 118.51 | 5.53  |
| -6 | 6 | -5  | 128.90 | 4.36  |
| -6 | 6 | -5  | 122.39 | 4.03  |
| -6 | 6 | -5  | 122.79 | 3.71  |
| -6 | 6 | -5  | 120.46 | 4.11  |
| -6 | 6 | -4  | 0.30   | 1.12  |
| -6 | 6 | -4  | 1.63   | 1.15  |
| -6 | 6 | -4  | 1.34   | 0.92  |
| -6 | 6 | -4  | 0.94   | 1.28  |

## CIF 31

|    |   |    |        |       |
|----|---|----|--------|-------|
| -6 | 6 | -4 | 2.11   | 0.75  |
| -6 | 6 | -4 | 0.64   | 0.71  |
| -6 | 6 | -4 | 1.24   | 1.43  |
| -6 | 6 | -4 | 1.41   | 1.02  |
| -6 | 6 | -3 | 452.90 | 10.57 |
| -6 | 6 | -3 | 444.54 | 7.74  |
| -6 | 6 | -3 | 435.11 | 9.24  |
| -6 | 6 | -3 | 442.92 | 10.15 |
| -6 | 6 | -3 | 438.52 | 10.07 |
| -6 | 6 | -3 | 454.29 | 7.69  |
| -6 | 6 | -3 | 460.70 | 7.75  |
| -6 | 6 | -2 | 452.09 | 10.09 |
| -6 | 6 | -2 | 453.60 | 8.53  |
| -6 | 6 | -2 | 411.20 | 7.07  |
| -6 | 6 | -2 | 451.93 | 9.39  |
| -6 | 6 | -2 | 450.40 | 10.13 |
| -6 | 6 | -2 | 390.31 | 7.01  |
| -6 | 6 | -2 | 482.01 | 10.24 |
| -6 | 6 | -2 | 419.79 | 7.57  |
| -6 | 6 | -2 | 408.21 | 7.11  |
| -6 | 6 | -2 | 460.41 | 10.47 |
| -6 | 6 | -2 | 458.34 | 9.70  |
| -6 | 6 | -1 | 134.13 | 5.40  |
| -6 | 6 | -1 | 157.86 | 3.89  |
| -6 | 6 | -1 | 151.32 | 5.70  |
| -6 | 6 | -1 | 164.43 | 4.99  |
| -6 | 6 | -1 | 154.74 | 4.89  |
| -6 | 6 | -1 | 164.50 | 5.61  |
| -6 | 6 | -1 | 154.47 | 5.31  |
| -6 | 6 | -1 | 153.09 | 5.64  |
| -6 | 6 | -1 | 155.79 | 4.96  |
| -6 | 6 | -1 | 168.69 | 4.19  |
| -6 | 6 | -1 | 152.29 | 3.88  |
| -6 | 6 | -1 | 158.50 | 4.57  |
| -6 | 6 | -1 | 141.08 | 5.34  |
| -6 | 6 | 0  | 4.49   | 1.04  |
| -6 | 6 | 0  | 1.56   | 1.02  |
| -6 | 6 | 0  | 3.42   | 0.95  |
| -6 | 6 | 0  | 1.32   | 0.75  |
| -6 | 6 | 0  | 2.57   | 1.17  |
| -6 | 6 | 0  | 1.44   | 1.09  |



## CIF 31

|    |   |   |         |       |
|----|---|---|---------|-------|
| -6 | 6 | 0 | 1.94    | 1.14  |
| -6 | 6 | 0 | 1.40    | 0.85  |
| -6 | 6 | 0 | 1.04    | 0.72  |
| -6 | 6 | 0 | 1.87    | 1.14  |
| -6 | 6 | 0 | 3.04    | 1.16  |
| -6 | 6 | 0 | 2.70    | 1.33  |
| -6 | 6 | 0 | 2.56    | 1.20  |
| -6 | 6 | 0 | 3.31    | 1.13  |
| -6 | 6 | 1 | 345.48  | 8.20  |
| -6 | 6 | 1 | 379.84  | 6.91  |
| -6 | 6 | 1 | 397.92  | 7.38  |
| -6 | 6 | 1 | 379.11  | 7.63  |
| -6 | 6 | 1 | 362.11  | 8.19  |
| -6 | 6 | 1 | 350.76  | 8.30  |
| -6 | 6 | 1 | 352.80  | 8.00  |
| -6 | 6 | 1 | 376.75  | 8.16  |
| -6 | 6 | 1 | 383.12  | 8.63  |
| -6 | 6 | 1 | 369.62  | 7.69  |
| -6 | 6 | 1 | 339.00  | 6.38  |
| -6 | 6 | 1 | 378.38  | 7.27  |
| -6 | 6 | 2 | 3456.22 | 35.91 |
| -6 | 6 | 2 | 3458.64 | 35.15 |
| -6 | 6 | 2 | 3572.15 | 36.69 |
| -6 | 6 | 2 | 3267.35 | 35.66 |
| -6 | 6 | 2 | 3462.37 | 34.60 |
| -6 | 6 | 2 | 3504.52 | 33.79 |
| -6 | 6 | 2 | 3544.59 | 36.37 |
| -6 | 6 | 2 | 3224.33 | 33.15 |
| -6 | 6 | 2 | 3400.53 | 35.92 |
| -6 | 6 | 2 | 3674.78 | 38.57 |
| -6 | 6 | 2 | 3427.17 | 36.30 |
| -6 | 6 | 2 | 3112.78 | 34.81 |
| -6 | 6 | 3 | 11.03   | 1.68  |
| -6 | 6 | 3 | 10.80   | 1.37  |
| -6 | 6 | 3 | 11.33   | 1.79  |
| -6 | 6 | 3 | 11.85   | 1.42  |
| -6 | 6 | 3 | 12.86   | 1.89  |
| -6 | 6 | 3 | 11.78   | 1.32  |
| -6 | 6 | 3 | 10.66   | 1.89  |
| -6 | 6 | 3 | 10.59   | 1.70  |
| -6 | 6 | 3 | 9.80    | 1.50  |

## CIF 31

|    |   |   |        |      |
|----|---|---|--------|------|
| -6 | 6 | 3 | 11.51  | 1.81 |
| -6 | 6 | 3 | 11.08  | 1.50 |
| -6 | 6 | 3 | 15.27  | 1.86 |
| -6 | 6 | 3 | 11.95  | 1.77 |
| -6 | 6 | 3 | 10.02  | 1.58 |
| -6 | 6 | 4 | 247.19 | 5.88 |
| -6 | 6 | 4 | 239.93 | 6.82 |
| -6 | 6 | 4 | 233.97 | 7.25 |
| -6 | 6 | 4 | 249.32 | 6.28 |
| -6 | 6 | 4 | 245.96 | 6.44 |
| -6 | 6 | 4 | 249.96 | 5.69 |
| -6 | 6 | 4 | 259.82 | 6.76 |
| -6 | 6 | 4 | 243.59 | 6.91 |
| -6 | 6 | 4 | 255.40 | 5.76 |
| -6 | 6 | 4 | 263.72 | 7.00 |
| -6 | 6 | 4 | 260.39 | 6.89 |
| -6 | 6 | 5 | 38.79  | 3.02 |
| -6 | 6 | 5 | 43.85  | 2.79 |
| -6 | 6 | 5 | 38.96  | 2.85 |
| -6 | 6 | 5 | 42.46  | 3.14 |
| -6 | 6 | 5 | 41.25  | 2.34 |
| -6 | 6 | 5 | 41.75  | 2.97 |
| -6 | 6 | 5 | 42.61  | 2.46 |
| -6 | 6 | 5 | 39.82  | 2.46 |
| -6 | 6 | 5 | 40.25  | 2.93 |
| -6 | 6 | 5 | 40.50  | 2.98 |
| -6 | 6 | 5 | 43.62  | 2.93 |
| -6 | 6 | 5 | 41.44  | 2.78 |
| -6 | 6 | 6 | 1.40   | 1.18 |
| -6 | 6 | 6 | 1.50   | 0.86 |
| -6 | 6 | 6 | 1.72   | 0.94 |
| -6 | 6 | 6 | 1.46   | 1.46 |
| -6 | 6 | 6 | 1.31   | 1.27 |
| -6 | 6 | 6 | 1.31   | 0.92 |
| -6 | 6 | 6 | 2.15   | 1.60 |
| -6 | 6 | 6 | 1.50   | 1.24 |
| -6 | 6 | 6 | 2.57   | 1.42 |
| -6 | 6 | 6 | 2.25   | 1.26 |
| -6 | 6 | 6 | 1.91   | 1.39 |
| -6 | 6 | 6 | 1.63   | 1.29 |
| -6 | 6 | 7 | 366.84 | 7.57 |

## CIF 31

|    |   |    |        |       |
|----|---|----|--------|-------|
| -6 | 6 | 7  | 344.51 | 8.88  |
| -6 | 6 | 7  | 355.86 | 7.43  |
| -6 | 6 | 7  | 335.05 | 7.97  |
| -6 | 6 | 7  | 336.44 | 8.36  |
| -6 | 6 | 7  | 304.63 | 7.89  |
| -6 | 6 | 7  | 378.78 | 9.17  |
| -6 | 6 | 7  | 355.64 | 8.86  |
| -6 | 6 | 7  | 346.46 | 8.92  |
| -6 | 6 | 7  | 360.90 | 8.67  |
| -6 | 6 | 8  | 71.76  | 3.97  |
| -6 | 6 | 8  | 77.10  | 3.91  |
| -6 | 6 | 8  | 77.57  | 4.11  |
| -6 | 6 | 8  | 73.23  | 3.60  |
| -6 | 6 | 8  | 74.27  | 3.91  |
| -6 | 6 | 8  | 77.25  | 4.22  |
| -6 | 6 | 8  | 75.52  | 3.79  |
| -6 | 6 | 8  | 91.31  | 3.60  |
| -6 | 6 | 8  | 79.51  | 3.35  |
| -6 | 6 | 9  | 80.01  | 4.12  |
| -6 | 6 | 9  | 65.91  | 3.57  |
| -6 | 6 | 9  | 84.27  | 4.09  |
| -6 | 6 | 9  | 75.95  | 4.19  |
| -6 | 6 | 9  | 72.85  | 3.53  |
| -6 | 6 | 9  | 69.59  | 3.08  |
| -6 | 6 | 9  | 76.76  | 4.09  |
| -6 | 6 | 9  | 73.78  | 3.24  |
| -6 | 6 | 9  | 70.01  | 3.66  |
| -6 | 6 | 10 | 745.99 | 12.57 |
| -6 | 6 | 10 | 800.66 | 13.37 |
| -6 | 6 | 10 | 735.25 | 10.81 |
| -6 | 6 | 10 | 791.75 | 11.56 |
| -6 | 6 | 10 | 809.88 | 13.32 |
| -6 | 6 | 10 | 729.70 | 11.92 |
| -6 | 6 | 10 | 840.34 | 13.45 |
| -6 | 6 | 10 | 722.48 | 12.62 |
| -6 | 6 | 11 | 877.07 | 12.33 |
| -6 | 6 | 11 | 851.28 | 12.81 |
| -6 | 6 | 11 | 886.99 | 13.20 |
| -6 | 6 | 11 | 890.50 | 12.83 |
| -6 | 6 | 11 | 831.74 | 12.69 |
| -6 | 6 | 11 | 802.01 | 12.39 |

## CIF 31

|    |   |     |        |       |
|----|---|-----|--------|-------|
| -6 | 6 | 11  | 871.50 | 12.50 |
| -6 | 6 | 12  | 97.64  | 3.39  |
| -6 | 6 | 12  | 101.62 | 3.38  |
| -6 | 6 | 12  | 104.83 | 3.18  |
| -6 | 6 | 12  | 96.39  | 3.20  |
| -6 | 6 | 12  | 95.85  | 3.29  |
| -6 | 6 | 12  | 98.28  | 2.97  |
| -6 | 6 | 12  | 106.45 | 3.35  |
| -6 | 6 | 13  | 462.05 | 6.38  |
| -6 | 6 | 13  | 450.80 | 6.15  |
| -6 | 7 | -11 | 5.41   | 0.83  |
| -6 | 7 | -11 | 5.92   | 1.95  |
| -6 | 7 | -10 | 97.63  | 3.12  |
| -6 | 7 | -10 | 104.30 | 3.29  |
| -6 | 7 | -9  | 68.25  | 2.66  |
| -6 | 7 | -9  | 72.73  | 3.67  |
| -6 | 7 | -9  | 74.82  | 4.53  |
| -6 | 7 | -9  | 68.98  | 3.88  |
| -6 | 7 | -8  | 21.54  | 2.19  |
| -6 | 7 | -8  | 19.74  | 2.49  |
| -6 | 7 | -8  | 23.77  | 1.75  |
| -6 | 7 | -8  | 23.98  | 1.93  |
| -6 | 7 | -7  | 374.44 | 7.56  |
| -6 | 7 | -7  | 356.72 | 6.97  |
| -6 | 7 | -7  | 364.20 | 6.94  |
| -6 | 7 | -6  | 3.03   | 1.64  |
| -6 | 7 | -6  | 4.57   | 1.38  |
| -6 | 7 | -6  | 3.65   | 1.02  |
| -6 | 7 | -6  | 3.77   | 0.96  |
| -6 | 7 | -6  | 3.51   | 1.22  |
| -6 | 7 | -6  | 3.47   | 0.97  |
| -6 | 7 | -5  | 302.24 | 6.14  |
| -6 | 7 | -5  | 276.11 | 7.73  |
| -6 | 7 | -5  | 290.86 | 6.56  |
| -6 | 7 | -5  | 300.32 | 6.06  |
| -6 | 7 | -5  | 282.18 | 8.68  |
| -6 | 7 | -5  | 288.61 | 8.24  |
| -6 | 7 | -5  | 295.07 | 6.78  |
| -6 | 7 | -5  | 315.02 | 6.61  |
| -6 | 7 | -4  | 5.17   | 1.18  |
| -6 | 7 | -4  | 5.37   | 1.69  |

## CIF 31

|    |   |    |        |       |
|----|---|----|--------|-------|
| -6 | 7 | -4 | 4.57   | 1.05  |
| -6 | 7 | -4 | 3.04   | 1.17  |
| -6 | 7 | -4 | 5.88   | 1.92  |
| -6 | 7 | -4 | 4.36   | 1.47  |
| -6 | 7 | -4 | 3.91   | 0.96  |
| -6 | 7 | -4 | 4.05   | 0.87  |
| -6 | 7 | -3 | 525.95 | 7.85  |
| -6 | 7 | -3 | 500.33 | 11.33 |
| -6 | 7 | -3 | 481.93 | 11.04 |
| -6 | 7 | -3 | 510.32 | 8.70  |
| -6 | 7 | -3 | 473.01 | 10.40 |
| -6 | 7 | -3 | 508.65 | 8.54  |
| -6 | 7 | -3 | 447.54 | 10.85 |
| -6 | 7 | -3 | 499.86 | 7.89  |
| -6 | 7 | -3 | 448.57 | 9.59  |
| -6 | 7 | -3 | 409.81 | 10.70 |
| -6 | 7 | -3 | 515.15 | 8.37  |
| -6 | 7 | -3 | 493.95 | 11.05 |
| -6 | 7 | -2 | 293.95 | 8.37  |
| -6 | 7 | -2 | 288.86 | 8.35  |
| -6 | 7 | -2 | 284.20 | 7.85  |
| -6 | 7 | -2 | 270.11 | 8.21  |
| -6 | 7 | -2 | 291.83 | 6.76  |
| -6 | 7 | -2 | 290.52 | 6.13  |
| -6 | 7 | -2 | 299.15 | 8.22  |
| -6 | 7 | -2 | 294.70 | 8.31  |
| -6 | 7 | -2 | 280.45 | 6.77  |
| -6 | 7 | -2 | 275.43 | 7.37  |
| -6 | 7 | -1 | 199.83 | 6.83  |
| -6 | 7 | -1 | 220.37 | 7.25  |
| -6 | 7 | -1 | 227.20 | 7.06  |
| -6 | 7 | -1 | 219.65 | 6.10  |
| -6 | 7 | -1 | 211.04 | 6.71  |
| -6 | 7 | -1 | 238.90 | 5.36  |
| -6 | 7 | -1 | 224.46 | 6.26  |
| -6 | 7 | -1 | 213.36 | 6.47  |
| -6 | 7 | -1 | 227.69 | 5.59  |
| -6 | 7 | -1 | 220.04 | 6.84  |
| -6 | 7 | -1 | 224.03 | 6.06  |
| -6 | 7 | 0  | 197.31 | 5.45  |
| -6 | 7 | 0  | 193.02 | 5.95  |

## CIF 31

|    |   |   |         |       |
|----|---|---|---------|-------|
| -6 | 7 | 0 | 220.50  | 6.78  |
| -6 | 7 | 0 | 173.02  | 6.18  |
| -6 | 7 | 0 | 200.67  | 6.32  |
| -6 | 7 | 0 | 201.18  | 4.91  |
| -6 | 7 | 0 | 181.20  | 5.72  |
| -6 | 7 | 0 | 194.70  | 6.38  |
| -6 | 7 | 0 | 187.67  | 5.80  |
| -6 | 7 | 0 | 189.96  | 6.16  |
| -6 | 7 | 0 | 202.89  | 6.60  |
| -6 | 7 | 0 | 197.73  | 5.16  |
| -6 | 7 | 0 | 195.93  | 6.87  |
| -6 | 7 | 1 | 19.40   | 2.14  |
| -6 | 7 | 1 | 17.62   | 1.76  |
| -6 | 7 | 1 | 17.29   | 2.05  |
| -6 | 7 | 1 | 20.28   | 1.73  |
| -6 | 7 | 1 | 18.84   | 1.93  |
| -6 | 7 | 1 | 20.09   | 2.30  |
| -6 | 7 | 1 | 16.00   | 1.99  |
| -6 | 7 | 1 | 18.76   | 2.19  |
| -6 | 7 | 1 | 25.28   | 1.77  |
| -6 | 7 | 1 | 22.73   | 1.84  |
| -6 | 7 | 1 | 21.05   | 2.30  |
| -6 | 7 | 1 | 18.86   | 2.10  |
| -6 | 7 | 2 | 1073.62 | 16.47 |
| -6 | 7 | 2 | 1049.87 | 16.12 |
| -6 | 7 | 2 | 1086.44 | 15.76 |
| -6 | 7 | 2 | 1057.14 | 14.28 |
| -6 | 7 | 2 | 1046.66 | 16.41 |
| -6 | 7 | 2 | 1158.46 | 17.00 |
| -6 | 7 | 2 | 1094.92 | 15.43 |
| -6 | 7 | 2 | 1012.77 | 17.30 |
| -6 | 7 | 2 | 1104.02 | 16.42 |
| -6 | 7 | 2 | 1067.23 | 14.91 |
| -6 | 7 | 2 | 1013.13 | 15.64 |
| -6 | 7 | 2 | 1061.09 | 16.52 |
| -6 | 7 | 2 | 1090.19 | 14.39 |
| -6 | 7 | 3 | 66.31   | 3.86  |
| -6 | 7 | 3 | 56.08   | 2.85  |
| -6 | 7 | 3 | 59.99   | 3.43  |
| -6 | 7 | 3 | 60.08   | 2.85  |
| -6 | 7 | 3 | 66.40   | 3.78  |

## CIF 31

|    |   |   |        |      |
|----|---|---|--------|------|
| -6 | 7 | 3 | 60.36  | 3.58 |
| -6 | 7 | 3 | 57.23  | 2.82 |
| -6 | 7 | 3 | 62.04  | 3.59 |
| -6 | 7 | 3 | 53.18  | 2.56 |
| -6 | 7 | 3 | 60.29  | 3.48 |
| -6 | 7 | 3 | 59.73  | 3.86 |
| -6 | 7 | 3 | 61.27  | 3.38 |
| -6 | 7 | 3 | 57.01  | 3.16 |
| -6 | 7 | 3 | 57.95  | 3.19 |
| -6 | 7 | 4 | 203.55 | 6.19 |
| -6 | 7 | 4 | 194.59 | 6.47 |
| -6 | 7 | 4 | 197.67 | 5.71 |
| -6 | 7 | 4 | 190.27 | 5.93 |
| -6 | 7 | 4 | 195.61 | 6.22 |
| -6 | 7 | 4 | 200.09 | 5.28 |
| -6 | 7 | 4 | 207.61 | 6.61 |
| -6 | 7 | 4 | 212.04 | 6.60 |
| -6 | 7 | 4 | 189.68 | 6.76 |
| -6 | 7 | 4 | 206.20 | 5.54 |
| -6 | 7 | 4 | 207.76 | 6.35 |
| -6 | 7 | 5 | 80.04  | 3.30 |
| -6 | 7 | 5 | 76.25  | 4.10 |
| -6 | 7 | 5 | 70.38  | 4.12 |
| -6 | 7 | 5 | 70.60  | 4.08 |
| -6 | 7 | 5 | 76.89  | 3.33 |
| -6 | 7 | 5 | 84.34  | 4.12 |
| -6 | 7 | 5 | 78.49  | 4.10 |
| -6 | 7 | 5 | 84.37  | 4.38 |
| -6 | 7 | 5 | 84.10  | 3.49 |
| -6 | 7 | 5 | 75.05  | 3.69 |
| -6 | 7 | 5 | 75.97  | 4.13 |
| -6 | 7 | 5 | 74.20  | 3.78 |
| -6 | 7 | 6 | 327.07 | 7.59 |
| -6 | 7 | 6 | 342.31 | 8.86 |
| -6 | 7 | 6 | 371.35 | 8.56 |
| -6 | 7 | 6 | 344.52 | 8.89 |
| -6 | 7 | 6 | 327.23 | 8.40 |
| -6 | 7 | 6 | 354.48 | 8.86 |
| -6 | 7 | 6 | 342.65 | 8.68 |
| -6 | 7 | 6 | 334.04 | 7.94 |
| -6 | 7 | 6 | 343.77 | 8.77 |

## CIF 31

|    |   |    |        |      |
|----|---|----|--------|------|
| -6 | 7 | 6  | 326.71 | 8.97 |
| -6 | 7 | 6  | 356.98 | 7.27 |
| -6 | 7 | 6  | 333.82 | 8.93 |
| -6 | 7 | 6  | 377.99 | 7.81 |
| -6 | 7 | 7  | 141.95 | 4.58 |
| -6 | 7 | 7  | 128.51 | 5.36 |
| -6 | 7 | 7  | 133.89 | 5.19 |
| -6 | 7 | 7  | 138.61 | 4.34 |
| -6 | 7 | 7  | 149.56 | 5.77 |
| -6 | 7 | 7  | 131.90 | 5.29 |
| -6 | 7 | 7  | 140.05 | 5.60 |
| -6 | 7 | 7  | 124.29 | 5.27 |
| -6 | 7 | 7  | 124.62 | 4.99 |
| -6 | 7 | 7  | 124.00 | 4.65 |
| -6 | 7 | 8  | 54.64  | 3.37 |
| -6 | 7 | 8  | 55.93  | 2.64 |
| -6 | 7 | 8  | 61.91  | 2.99 |
| -6 | 7 | 8  | 63.26  | 3.49 |
| -6 | 7 | 8  | 57.53  | 3.69 |
| -6 | 7 | 8  | 61.74  | 3.53 |
| -6 | 7 | 8  | 65.93  | 3.79 |
| -6 | 7 | 8  | 61.51  | 3.66 |
| -6 | 7 | 8  | 59.00  | 3.72 |
| -6 | 7 | 8  | 57.73  | 3.21 |
| -6 | 7 | 8  | 51.78  | 3.07 |
| -6 | 7 | 9  | 45.38  | 2.87 |
| -6 | 7 | 9  | 41.54  | 2.36 |
| -6 | 7 | 9  | 41.61  | 2.79 |
| -6 | 7 | 9  | 46.01  | 2.78 |
| -6 | 7 | 9  | 45.84  | 3.04 |
| -6 | 7 | 9  | 41.09  | 2.89 |
| -6 | 7 | 9  | 38.77  | 2.57 |
| -6 | 7 | 10 | 30.58  | 2.39 |
| -6 | 7 | 10 | 23.92  | 1.66 |
| -6 | 7 | 10 | 26.43  | 1.85 |
| -6 | 7 | 10 | 30.38  | 2.11 |
| -6 | 7 | 10 | 27.03  | 2.20 |
| -6 | 7 | 10 | 21.33  | 1.79 |
| -6 | 7 | 10 | 27.46  | 2.29 |
| -6 | 7 | 10 | 25.02  | 1.97 |
| -6 | 7 | 10 | 29.96  | 2.35 |



## CIF 31

|    |   |     |        |      |
|----|---|-----|--------|------|
| -6 | 7 | 11  | 73.06  | 2.89 |
| -6 | 7 | 11  | 67.35  | 2.80 |
| -6 | 7 | 11  | 71.01  | 2.90 |
| -6 | 7 | 11  | 75.61  | 2.76 |
| -6 | 7 | 11  | 72.03  | 2.99 |
| -6 | 7 | 11  | 72.00  | 3.01 |
| -6 | 7 | 12  | 273.47 | 4.77 |
| -6 | 7 | 12  | 282.61 | 4.46 |
| -6 | 8 | -11 | 9.03   | 0.81 |
| -6 | 8 | -11 | 10.76  | 1.87 |
| -6 | 8 | -10 | 62.45  | 2.14 |
| -6 | 8 | -10 | 66.52  | 2.47 |
| -6 | 8 | -10 | 69.47  | 3.44 |
| -6 | 8 | -9  | 365.72 | 7.14 |
| -6 | 8 | -9  | 365.82 | 6.24 |
| -6 | 8 | -9  | 358.22 | 6.58 |
| -6 | 8 | -8  | 132.77 | 3.80 |
| -6 | 8 | -8  | 132.26 | 4.08 |
| -6 | 8 | -8  | 135.93 | 5.08 |
| -6 | 8 | -7  | 95.51  | 3.88 |
| -6 | 8 | -7  | 98.16  | 3.88 |
| -6 | 8 | -7  | 94.03  | 3.28 |
| -6 | 8 | -7  | 94.10  | 3.59 |
| -6 | 8 | -6  | 6.95   | 1.37 |
| -6 | 8 | -6  | 6.72   | 1.90 |
| -6 | 8 | -6  | 9.23   | 1.22 |
| -6 | 8 | -6  | 6.76   | 1.17 |
| -6 | 8 | -6  | 7.71   | 1.49 |
| -6 | 8 | -6  | 7.37   | 1.38 |
| -6 | 8 | -5  | 79.65  | 4.40 |
| -6 | 8 | -5  | 97.74  | 3.44 |
| -6 | 8 | -5  | 80.69  | 4.23 |
| -6 | 8 | -5  | 86.05  | 4.81 |
| -6 | 8 | -5  | 79.16  | 3.35 |
| -6 | 8 | -5  | 100.65 | 3.75 |
| -6 | 8 | -5  | 102.16 | 3.40 |
| -6 | 8 | -5  | 81.19  | 4.84 |
| -6 | 8 | -5  | 100.67 | 3.74 |
| -6 | 8 | -4  | 277.01 | 8.28 |
| -6 | 8 | -4  | 297.45 | 5.91 |
| -6 | 8 | -4  | 280.03 | 6.37 |

## CIF 31

|    |   |    |         |       |
|----|---|----|---------|-------|
| -6 | 8 | -4 | 258.08  | 6.85  |
| -6 | 8 | -4 | 276.78  | 8.62  |
| -6 | 8 | -4 | 268.71  | 5.69  |
| -6 | 8 | -4 | 282.67  | 8.34  |
| -6 | 8 | -4 | 286.11  | 6.50  |
| -6 | 8 | -4 | 283.34  | 6.33  |
| -6 | 8 | -4 | 286.16  | 8.74  |
| -6 | 8 | -3 | 122.19  | 3.54  |
| -6 | 8 | -3 | 106.31  | 5.20  |
| -6 | 8 | -3 | 104.18  | 5.15  |
| -6 | 8 | -3 | 99.39   | 5.04  |
| -6 | 8 | -3 | 100.72  | 5.25  |
| -6 | 8 | -3 | 116.30  | 3.98  |
| -6 | 8 | -3 | 110.25  | 4.58  |
| -6 | 8 | -3 | 106.74  | 4.90  |
| -6 | 8 | -3 | 124.51  | 4.00  |
| -6 | 8 | -2 | 961.66  | 14.35 |
| -6 | 8 | -2 | 936.15  | 12.99 |
| -6 | 8 | -2 | 895.31  | 16.37 |
| -6 | 8 | -2 | 929.74  | 12.40 |
| -6 | 8 | -2 | 938.92  | 15.34 |
| -6 | 8 | -2 | 934.68  | 15.76 |
| -6 | 8 | -2 | 907.65  | 16.69 |
| -6 | 8 | -2 | 933.95  | 16.25 |
| -6 | 8 | -2 | 963.53  | 14.18 |
| -6 | 8 | -2 | 975.95  | 16.66 |
| -6 | 8 | -2 | 940.03  | 16.44 |
| -6 | 8 | -1 | 117.36  | 5.37  |
| -6 | 8 | -1 | 112.17  | 5.47  |
| -6 | 8 | -1 | 116.92  | 5.24  |
| -6 | 8 | -1 | 127.32  | 5.54  |
| -6 | 8 | -1 | 123.16  | 4.70  |
| -6 | 8 | -1 | 122.55  | 5.05  |
| -6 | 8 | -1 | 128.60  | 4.62  |
| -6 | 8 | -1 | 114.92  | 5.13  |
| -6 | 8 | -1 | 134.47  | 4.15  |
| -6 | 8 | -1 | 127.79  | 4.37  |
| -6 | 8 | -1 | 113.14  | 4.68  |
| -6 | 8 | 0  | 5267.38 | 51.42 |
| -6 | 8 | 0  | 5108.62 | 52.19 |
| -6 | 8 | 0  | 5024.38 | 52.58 |

## CIF 31

|    |   |   |         |       |
|----|---|---|---------|-------|
| -6 | 8 | 0 | 5150.91 | 52.74 |
| -6 | 8 | 0 | 5449.19 | 52.35 |
| -6 | 8 | 0 | 5412.36 | 53.66 |
| -6 | 8 | 0 | 5073.62 | 51.83 |
| -6 | 8 | 0 | 5199.18 | 49.32 |
| -6 | 8 | 0 | 5373.37 | 53.38 |
| -6 | 8 | 0 | 5177.61 | 50.95 |
| -6 | 8 | 0 | 5228.23 | 49.61 |
| -6 | 8 | 1 | 237.15  | 7.89  |
| -6 | 8 | 1 | 257.98  | 7.36  |
| -6 | 8 | 1 | 247.19  | 6.98  |
| -6 | 8 | 1 | 218.71  | 6.79  |
| -6 | 8 | 1 | 235.32  | 6.48  |
| -6 | 8 | 1 | 231.01  | 7.06  |
| -6 | 8 | 1 | 244.14  | 7.56  |
| -6 | 8 | 1 | 217.40  | 6.36  |
| -6 | 8 | 1 | 240.80  | 6.10  |
| -6 | 8 | 1 | 248.03  | 7.03  |
| -6 | 8 | 1 | 246.65  | 7.45  |
| -6 | 8 | 2 | 15.16   | 2.18  |
| -6 | 8 | 2 | 7.81    | 1.75  |
| -6 | 8 | 2 | 10.93   | 1.79  |
| -6 | 8 | 2 | 8.04    | 1.81  |
| -6 | 8 | 2 | 14.85   | 1.97  |
| -6 | 8 | 2 | 16.60   | 1.87  |
| -6 | 8 | 2 | 11.14   | 2.03  |
| -6 | 8 | 2 | 8.88    | 1.24  |
| -6 | 8 | 2 | 8.78    | 1.40  |
| -6 | 8 | 2 | 10.35   | 1.52  |
| -6 | 8 | 2 | 15.46   | 2.17  |
| -6 | 8 | 2 | 12.14   | 2.30  |
| -6 | 8 | 3 | 7.57    | 1.86  |
| -6 | 8 | 3 | 5.03    | 1.38  |
| -6 | 8 | 3 | 4.86    | 1.26  |
| -6 | 8 | 3 | 3.87    | 1.46  |
| -6 | 8 | 3 | 4.95    | 1.10  |
| -6 | 8 | 3 | 6.23    | 1.51  |
| -6 | 8 | 3 | 6.44    | 1.56  |
| -6 | 8 | 3 | 4.14    | 1.58  |
| -6 | 8 | 3 | 4.20    | 1.53  |
| -6 | 8 | 3 | 4.65    | 1.46  |

## CIF 31

|    |   |   |       |      |
|----|---|---|-------|------|
| -6 | 8 | 3 | 5.48  | 1.04 |
| -6 | 8 | 3 | 4.79  | 1.68 |
| -6 | 8 | 3 | 4.63  | 1.20 |
| -6 | 8 | 4 | 19.73 | 1.88 |
| -6 | 8 | 4 | 20.29 | 2.51 |
| -6 | 8 | 4 | 16.30 | 2.05 |
| -6 | 8 | 4 | 20.64 | 2.41 |
| -6 | 8 | 4 | 17.65 | 1.81 |
| -6 | 8 | 4 | 16.14 | 1.95 |
| -6 | 8 | 4 | 19.96 | 1.66 |
| -6 | 8 | 4 | 23.46 | 2.54 |
| -6 | 8 | 4 | 17.75 | 2.17 |
| -6 | 8 | 4 | 17.72 | 2.03 |
| -6 | 8 | 4 | 19.51 | 2.29 |
| -6 | 8 | 4 | 19.05 | 1.67 |
| -6 | 8 | 5 | 39.09 | 2.97 |
| -6 | 8 | 5 | 43.85 | 2.82 |
| -6 | 8 | 5 | 40.27 | 2.28 |
| -6 | 8 | 5 | 42.70 | 3.19 |
| -6 | 8 | 5 | 42.56 | 3.16 |
| -6 | 8 | 5 | 40.00 | 3.36 |
| -6 | 8 | 5 | 35.90 | 3.11 |
| -6 | 8 | 5 | 39.48 | 2.85 |
| -6 | 8 | 5 | 43.00 | 2.30 |
| -6 | 8 | 5 | 40.84 | 2.69 |
| -6 | 8 | 5 | 40.78 | 3.20 |
| -6 | 8 | 5 | 50.88 | 3.48 |
| -6 | 8 | 5 | 45.32 | 2.68 |
| -6 | 8 | 5 | 40.88 | 3.18 |
| -6 | 8 | 6 | 50.05 | 3.32 |
| -6 | 8 | 6 | 50.64 | 3.43 |
| -6 | 8 | 6 | 46.08 | 3.27 |
| -6 | 8 | 6 | 39.93 | 2.22 |
| -6 | 8 | 6 | 56.39 | 3.72 |
| -6 | 8 | 6 | 51.49 | 3.10 |
| -6 | 8 | 6 | 45.67 | 2.29 |
| -6 | 8 | 6 | 54.62 | 3.64 |
| -6 | 8 | 6 | 48.19 | 2.94 |
| -6 | 8 | 6 | 47.06 | 2.72 |
| -6 | 8 | 6 | 52.82 | 3.44 |
| -6 | 8 | 7 | 19.11 | 2.27 |

## CIF 31

|    |   |     |        |      |
|----|---|-----|--------|------|
| -6 | 8 | 7   | 17.45  | 2.18 |
| -6 | 8 | 7   | 16.87  | 2.17 |
| -6 | 8 | 7   | 18.43  | 2.07 |
| -6 | 8 | 7   | 18.40  | 2.30 |
| -6 | 8 | 7   | 17.33  | 2.15 |
| -6 | 8 | 7   | 17.79  | 2.17 |
| -6 | 8 | 7   | 16.25  | 1.36 |
| -6 | 8 | 7   | 15.70  | 1.61 |
| -6 | 8 | 7   | 17.63  | 1.99 |
| -6 | 8 | 8   | 160.23 | 4.49 |
| -6 | 8 | 8   | 155.44 | 5.42 |
| -6 | 8 | 8   | 172.87 | 5.62 |
| -6 | 8 | 8   | 156.27 | 4.95 |
| -6 | 8 | 8   | 168.49 | 5.35 |
| -6 | 8 | 8   | 191.30 | 5.99 |
| -6 | 8 | 8   | 171.57 | 5.79 |
| -6 | 8 | 8   | 179.80 | 5.55 |
| -6 | 8 | 9   | 40.40  | 2.74 |
| -6 | 8 | 9   | 37.61  | 2.33 |
| -6 | 8 | 9   | 48.59  | 2.88 |
| -6 | 8 | 9   | 48.73  | 2.28 |
| -6 | 8 | 9   | 52.13  | 2.83 |
| -6 | 8 | 9   | 46.11  | 2.65 |
| -6 | 8 | 9   | 46.19  | 2.80 |
| -6 | 8 | 9   | 44.89  | 2.45 |
| -6 | 8 | 10  | 22.17  | 1.74 |
| -6 | 8 | 10  | 24.97  | 1.80 |
| -6 | 8 | 10  | 23.98  | 1.66 |
| -6 | 8 | 10  | 23.11  | 1.36 |
| -6 | 8 | 11  | 62.90  | 2.27 |
| -6 | 8 | 11  | 57.06  | 2.01 |
| -6 | 8 | 11  | 61.73  | 2.15 |
| -6 | 9 | -10 | 107.53 | 2.54 |
| -6 | 9 | -10 | 102.31 | 3.54 |
| -6 | 9 | -9  | 143.93 | 3.65 |
| -6 | 9 | -9  | 152.16 | 3.54 |
| -6 | 9 | -8  | 198.48 | 4.66 |
| -6 | 9 | -8  | 199.94 | 4.44 |
| -6 | 9 | -8  | 197.77 | 5.46 |
| -6 | 9 | -7  | 1.21   | 1.28 |
| -6 | 9 | -7  | 1.08   | 0.75 |

## CIF 31

|    |   |    |        |       |
|----|---|----|--------|-------|
| -6 | 9 | -7 | 0.31   | 2.12  |
| -6 | 9 | -7 | 1.24   | 0.94  |
| -6 | 9 | -6 | 5.97   | 1.44  |
| -6 | 9 | -6 | 5.57   | 1.12  |
| -6 | 9 | -6 | 6.06   | 2.01  |
| -6 | 9 | -6 | 7.13   | 1.06  |
| -6 | 9 | -6 | 6.32   | 1.78  |
| -6 | 9 | -6 | 5.67   | 1.16  |
| -6 | 9 | -5 | 423.14 | 10.63 |
| -6 | 9 | -5 | 470.42 | 8.32  |
| -6 | 9 | -5 | 372.70 | 10.19 |
| -6 | 9 | -5 | 408.81 | 9.97  |
| -6 | 9 | -5 | 444.39 | 8.42  |
| -6 | 9 | -5 | 379.33 | 9.57  |
| -6 | 9 | -5 | 496.40 | 7.89  |
| -6 | 9 | -5 | 463.14 | 8.18  |
| -6 | 9 | -4 | 14.89  | 2.25  |
| -6 | 9 | -4 | 12.05  | 1.27  |
| -6 | 9 | -4 | 14.10  | 2.42  |
| -6 | 9 | -4 | 13.37  | 1.64  |
| -6 | 9 | -4 | 13.74  | 2.30  |
| -6 | 9 | -4 | 13.18  | 2.22  |
| -6 | 9 | -4 | 12.60  | 1.46  |
| -6 | 9 | -4 | 15.57  | 2.51  |
| -6 | 9 | -4 | 10.84  | 1.44  |
| -6 | 9 | -3 | 86.44  | 3.19  |
| -6 | 9 | -3 | 78.57  | 4.66  |
| -6 | 9 | -3 | 77.68  | 4.57  |
| -6 | 9 | -3 | 75.99  | 3.84  |
| -6 | 9 | -3 | 82.99  | 3.50  |
| -6 | 9 | -3 | 80.88  | 4.35  |
| -6 | 9 | -3 | 94.07  | 3.15  |
| -6 | 9 | -3 | 87.79  | 4.73  |
| -6 | 9 | -3 | 85.25  | 4.67  |
| -6 | 9 | -2 | 146.92 | 6.15  |
| -6 | 9 | -2 | 147.97 | 4.95  |
| -6 | 9 | -2 | 151.65 | 5.61  |
| -6 | 9 | -2 | 166.63 | 6.43  |
| -6 | 9 | -2 | 143.90 | 5.83  |
| -6 | 9 | -2 | 160.19 | 6.47  |
| -6 | 9 | -2 | 150.28 | 5.18  |

## CIF 31

|    |   |    |         |       |
|----|---|----|---------|-------|
| -6 | 9 | -2 | 139.88  | 4.55  |
| -6 | 9 | -2 | 169.83  | 6.83  |
| -6 | 9 | -2 | 151.03  | 6.02  |
| -6 | 9 | -1 | 6.23    | 1.91  |
| -6 | 9 | -1 | 3.05    | 1.29  |
| -6 | 9 | -1 | 2.25    | 1.45  |
| -6 | 9 | -1 | 6.98    | 1.92  |
| -6 | 9 | -1 | 5.22    | 1.53  |
| -6 | 9 | -1 | 3.86    | 1.14  |
| -6 | 9 | -1 | 6.46    | 1.64  |
| -6 | 9 | -1 | 4.90    | 1.48  |
| -6 | 9 | -1 | 3.92    | 1.52  |
| -6 | 9 | 0  | 57.22   | 3.93  |
| -6 | 9 | 0  | 49.26   | 3.24  |
| -6 | 9 | 0  | 55.65   | 3.81  |
| -6 | 9 | 0  | 66.09   | 3.23  |
| -6 | 9 | 0  | 60.36   | 3.54  |
| -6 | 9 | 0  | 58.95   | 3.74  |
| -6 | 9 | 0  | 54.76   | 3.68  |
| -6 | 9 | 0  | 59.40   | 3.35  |
| -6 | 9 | 0  | 62.53   | 2.90  |
| -6 | 9 | 0  | 52.64   | 3.48  |
| -6 | 9 | 1  | 0.91    | 1.01  |
| -6 | 9 | 1  | 0.26    | 1.26  |
| -6 | 9 | 1  | 1.29    | 0.82  |
| -6 | 9 | 1  | 0.70    | 1.43  |
| -6 | 9 | 1  | 0.30    | 1.24  |
| -6 | 9 | 1  | 2.05    | 1.21  |
| -6 | 9 | 1  | 1.01    | 0.87  |
| -6 | 9 | 1  | 1.13    | 1.29  |
| -6 | 9 | 1  | 0.77    | 1.58  |
| -6 | 9 | 2  | 1156.56 | 15.98 |
| -6 | 9 | 2  | 1108.89 | 16.93 |
| -6 | 9 | 2  | 1149.47 | 16.68 |
| -6 | 9 | 2  | 1152.83 | 18.17 |
| -6 | 9 | 2  | 1053.13 | 17.74 |
| -6 | 9 | 2  | 1166.04 | 15.95 |
| -6 | 9 | 2  | 1218.73 | 17.90 |
| -6 | 9 | 2  | 1058.54 | 14.47 |
| -6 | 9 | 2  | 1204.59 | 18.50 |
| -6 | 9 | 2  | 1125.89 | 17.39 |

## CIF 31

|    |   |   |         |       |
|----|---|---|---------|-------|
| -6 | 9 | 2 | 1075.56 | 18.71 |
| -6 | 9 | 2 | 1147.61 | 15.49 |
| -6 | 9 | 3 | 1.33    | 1.00  |
| -6 | 9 | 3 | 0.38    | 1.14  |
| -6 | 9 | 3 | 0.94    | 1.47  |
| -6 | 9 | 3 | 1.53    | 1.26  |
| -6 | 9 | 3 | 0.93    | 1.25  |
| -6 | 9 | 3 | 0.29    | 1.40  |
| -6 | 9 | 3 | 1.01    | 0.91  |
| -6 | 9 | 3 | 4.68    | 1.85  |
| -6 | 9 | 3 | 1.41    | 1.16  |
| -6 | 9 | 3 | 2.18    | 0.85  |
| -6 | 9 | 3 | 1.39    | 1.28  |
| -6 | 9 | 4 | 4.41    | 1.39  |
| -6 | 9 | 4 | 5.02    | 1.35  |
| -6 | 9 | 4 | 6.98    | 1.63  |
| -6 | 9 | 4 | 7.01    | 1.72  |
| -6 | 9 | 4 | 6.72    | 1.43  |
| -6 | 9 | 4 | 5.19    | 1.72  |
| -6 | 9 | 4 | 4.48    | 1.45  |
| -6 | 9 | 4 | 3.92    | 1.30  |
| -6 | 9 | 4 | 5.27    | 0.99  |
| -6 | 9 | 4 | 5.34    | 1.67  |
| -6 | 9 | 4 | 5.25    | 1.19  |
| -6 | 9 | 5 | 23.21   | 2.39  |
| -6 | 9 | 5 | 25.34   | 2.31  |
| -6 | 9 | 5 | 23.43   | 2.40  |
| -6 | 9 | 5 | 21.35   | 2.52  |
| -6 | 9 | 5 | 19.64   | 2.21  |
| -6 | 9 | 5 | 24.09   | 2.00  |
| -6 | 9 | 5 | 24.36   | 2.01  |
| -6 | 9 | 5 | 20.79   | 1.57  |
| -6 | 9 | 5 | 22.79   | 2.35  |
| -6 | 9 | 5 | 23.94   | 2.44  |
| -6 | 9 | 5 | 25.48   | 2.32  |
| -6 | 9 | 6 | 142.82  | 4.66  |
| -6 | 9 | 6 | 150.18  | 5.65  |
| -6 | 9 | 6 | 143.69  | 4.55  |
| -6 | 9 | 6 | 137.53  | 5.24  |
| -6 | 9 | 6 | 152.69  | 5.32  |
| -6 | 9 | 6 | 150.57  | 5.49  |



## CIF 31

|    |    |     |        |      |
|----|----|-----|--------|------|
| -6 | 9  | 6   | 149.72 | 5.23 |
| -6 | 9  | 6   | 146.19 | 5.37 |
| -6 | 9  | 7   | 227.20 | 6.23 |
| -6 | 9  | 7   | 218.18 | 5.67 |
| -6 | 9  | 7   | 229.02 | 6.33 |
| -6 | 9  | 7   | 224.99 | 6.40 |
| -6 | 9  | 7   | 211.41 | 6.31 |
| -6 | 9  | 7   | 208.59 | 6.18 |
| -6 | 9  | 7   | 218.10 | 6.17 |
| -6 | 9  | 8   | 85.31  | 3.54 |
| -6 | 9  | 8   | 87.68  | 2.96 |
| -6 | 9  | 8   | 88.15  | 3.70 |
| -6 | 9  | 8   | 89.43  | 3.71 |
| -6 | 9  | 8   | 82.93  | 3.49 |
| -6 | 9  | 8   | 91.20  | 3.60 |
| -6 | 9  | 8   | 83.98  | 3.24 |
| -6 | 9  | 8   | 86.45  | 3.42 |
| -6 | 9  | 9   | 250.45 | 5.65 |
| -6 | 9  | 9   | 288.06 | 5.48 |
| -6 | 9  | 9   | 264.93 | 4.76 |
| -6 | 9  | 9   | 291.51 | 5.96 |
| -6 | 9  | 9   | 291.39 | 5.83 |
| -6 | 9  | 9   | 242.44 | 4.85 |
| -6 | 9  | 10  | 0.89   | 0.55 |
| -6 | 10 | -10 | 280.12 | 3.80 |
| -6 | 10 | -10 | 234.57 | 3.48 |
| -6 | 10 | -9  | 104.48 | 2.58 |
| -6 | 10 | -9  | 112.43 | 3.49 |
| -6 | 10 | -8  | 146.79 | 3.47 |
| -6 | 10 | -8  | 155.63 | 3.63 |
| -6 | 10 | -8  | 145.70 | 4.21 |
| -6 | 10 | -7  | 11.56  | 1.84 |
| -6 | 10 | -7  | 13.07  | 1.31 |
| -6 | 10 | -7  | 11.38  | 1.15 |
| -6 | 10 | -7  | 12.70  | 2.39 |
| -6 | 10 | -6  | 229.82 | 6.59 |
| -6 | 10 | -6  | 212.20 | 6.14 |
| -6 | 10 | -6  | 261.69 | 5.49 |
| -6 | 10 | -6  | 257.96 | 5.51 |
| -6 | 10 | -6  | 267.76 | 5.25 |
| -6 | 10 | -6  | 238.78 | 7.26 |

## CIF 31

|    |    |    |        |       |
|----|----|----|--------|-------|
| -6 | 10 | -5 | 33.77  | 2.98  |
| -6 | 10 | -5 | 45.37  | 2.31  |
| -6 | 10 | -5 | 35.41  | 3.15  |
| -6 | 10 | -5 | 33.68  | 2.81  |
| -6 | 10 | -5 | 33.50  | 2.83  |
| -6 | 10 | -5 | 48.25  | 2.36  |
| -6 | 10 | -5 | 33.22  | 3.23  |
| -6 | 10 | -5 | 53.55  | 2.35  |
| -6 | 10 | -5 | 41.85  | 2.44  |
| -6 | 10 | -4 | 334.18 | 8.41  |
| -6 | 10 | -4 | 381.88 | 9.48  |
| -6 | 10 | -4 | 356.34 | 9.54  |
| -6 | 10 | -4 | 401.11 | 6.78  |
| -6 | 10 | -4 | 371.61 | 9.94  |
| -6 | 10 | -4 | 363.15 | 7.53  |
| -6 | 10 | -4 | 338.67 | 9.48  |
| -6 | 10 | -4 | 342.92 | 9.20  |
| -6 | 10 | -4 | 387.87 | 7.04  |
| -6 | 10 | -4 | 357.65 | 6.43  |
| -6 | 10 | -3 | 0.73   | 1.53  |
| -6 | 10 | -3 | 0.58   | 1.28  |
| -6 | 10 | -3 | 0.47   | 1.22  |
| -6 | 10 | -3 | 1.27   | 0.75  |
| -6 | 10 | -3 | 0.35   | 0.90  |
| -6 | 10 | -3 | 0.48   | 0.82  |
| -6 | 10 | -3 | 1.99   | 1.30  |
| -6 | 10 | -3 | 1.68   | 1.66  |
| -6 | 10 | -2 | 838.94 | 14.81 |
| -6 | 10 | -2 | 816.40 | 13.11 |
| -6 | 10 | -2 | 858.65 | 15.26 |
| -6 | 10 | -2 | 821.48 | 15.85 |
| -6 | 10 | -2 | 803.28 | 14.93 |
| -6 | 10 | -2 | 795.08 | 14.48 |
| -6 | 10 | -2 | 800.49 | 14.96 |
| -6 | 10 | -2 | 807.78 | 13.78 |
| -6 | 10 | -2 | 783.76 | 12.21 |
| -6 | 10 | -1 | 70.07  | 4.23  |
| -6 | 10 | -1 | 78.38  | 4.68  |
| -6 | 10 | -1 | 60.36  | 3.75  |
| -6 | 10 | -1 | 79.45  | 4.14  |
| -6 | 10 | -1 | 73.82  | 3.95  |

## CIF 31

|    |    |    |        |      |
|----|----|----|--------|------|
| -6 | 10 | -1 | 68.80  | 3.86 |
| -6 | 10 | -1 | 81.73  | 4.35 |
| -6 | 10 | -1 | 81.48  | 3.35 |
| -6 | 10 | -1 | 75.49  | 3.67 |
| -6 | 10 | 0  | 0.80   | 1.13 |
| -6 | 10 | 0  | 2.51   | 1.45 |
| -6 | 10 | 0  | 2.15   | 1.44 |
| -6 | 10 | 0  | 1.13   | 0.83 |
| -6 | 10 | 0  | 2.68   | 1.23 |
| -6 | 10 | 0  | 1.72   | 1.34 |
| -6 | 10 | 0  | 2.14   | 0.95 |
| -6 | 10 | 0  | 1.43   | 1.00 |
| -6 | 10 | 0  | 3.01   | 1.33 |
| -6 | 10 | 0  | 2.18   | 1.68 |
| -6 | 10 | 1  | 28.96  | 2.61 |
| -6 | 10 | 1  | 24.34  | 1.89 |
| -6 | 10 | 1  | 27.20  | 2.63 |
| -6 | 10 | 1  | 29.61  | 2.55 |
| -6 | 10 | 1  | 30.91  | 2.80 |
| -6 | 10 | 1  | 29.70  | 2.80 |
| -6 | 10 | 1  | 29.38  | 2.80 |
| -6 | 10 | 1  | 27.01  | 2.34 |
| -6 | 10 | 1  | 29.08  | 3.08 |
| -6 | 10 | 1  | 27.99  | 2.19 |
| -6 | 10 | 2  | 1.18   | 1.10 |
| -6 | 10 | 2  | 1.62   | 1.18 |
| -6 | 10 | 2  | 0.77   | 1.51 |
| -6 | 10 | 2  | 1.35   | 1.31 |
| -6 | 10 | 2  | 0.70   | 1.26 |
| -6 | 10 | 2  | 1.33   | 0.79 |
| -6 | 10 | 2  | 0.69   | 1.30 |
| -6 | 10 | 2  | -0.07  | 1.39 |
| -6 | 10 | 2  | 0.89   | 0.96 |
| -6 | 10 | 2  | 0.51   | 1.08 |
| -6 | 10 | 2  | 0.36   | 0.86 |
| -6 | 10 | 3  | 90.26  | 4.00 |
| -6 | 10 | 3  | 95.79  | 3.30 |
| -6 | 10 | 3  | 90.58  | 4.65 |
| -6 | 10 | 3  | 103.49 | 4.90 |
| -6 | 10 | 3  | 88.38  | 4.33 |
| -6 | 10 | 3  | 76.12  | 4.19 |

## CIF 31

|    |    |    |       |      |
|----|----|----|-------|------|
| -6 | 10 | 3  | 96.54 | 3.75 |
| -6 | 10 | 3  | 90.72 | 4.28 |
| -6 | 10 | 3  | 95.30 | 4.56 |
| -6 | 10 | 3  | 89.76 | 4.27 |
| -6 | 10 | 4  | 2.13  | 0.99 |
| -6 | 10 | 4  | 1.62  | 1.07 |
| -6 | 10 | 4  | 1.88  | 1.08 |
| -6 | 10 | 4  | 2.31  | 1.17 |
| -6 | 10 | 4  | 3.27  | 1.50 |
| -6 | 10 | 4  | 2.55  | 1.12 |
| -6 | 10 | 4  | 1.93  | 1.35 |
| -6 | 10 | 4  | 4.71  | 1.41 |
| -6 | 10 | 4  | 1.57  | 1.27 |
| -6 | 10 | 5  | 30.39 | 2.41 |
| -6 | 10 | 5  | 30.31 | 2.49 |
| -6 | 10 | 5  | 30.04 | 2.48 |
| -6 | 10 | 5  | 29.71 | 2.70 |
| -6 | 10 | 5  | 25.83 | 2.11 |
| -6 | 10 | 5  | 30.38 | 2.30 |
| -6 | 10 | 5  | 27.41 | 2.10 |
| -6 | 10 | 6  | 2.40  | 1.06 |
| -6 | 10 | 6  | 3.82  | 1.06 |
| -6 | 10 | 6  | 2.20  | 1.00 |
| -6 | 10 | 6  | 4.78  | 1.37 |
| -6 | 10 | 6  | 3.20  | 1.15 |
| -6 | 10 | 6  | 4.05  | 1.32 |
| -6 | 10 | 6  | 3.21  | 1.11 |
| -6 | 10 | 7  | 9.15  | 1.31 |
| -6 | 10 | 7  | 4.97  | 1.13 |
| -6 | 10 | 7  | 5.30  | 1.09 |
| -6 | 10 | 7  | 7.42  | 1.23 |
| -6 | 10 | 7  | 5.54  | 1.05 |
| -6 | 10 | 8  | 69.14 | 2.52 |
| -6 | 10 | 8  | 55.68 | 2.20 |
| -6 | 11 | -9 | 15.41 | 0.81 |
| -6 | 11 | -9 | 14.46 | 0.72 |
| -6 | 11 | -8 | 0.79  | 0.75 |
| -6 | 11 | -8 | 0.72  | 0.41 |
| -6 | 11 | -8 | 1.13  | 0.52 |
| -6 | 11 | -7 | 52.34 | 1.87 |
| -6 | 11 | -7 | 54.21 | 2.90 |

## CIF 31

|    |    |    |        |      |
|----|----|----|--------|------|
| -6 | 11 | -6 | 16.39  | 1.21 |
| -6 | 11 | -6 | 8.31   | 1.38 |
| -6 | 11 | -6 | 13.79  | 1.15 |
| -6 | 11 | -6 | 9.72   | 1.75 |
| -6 | 11 | -5 | 45.01  | 1.96 |
| -6 | 11 | -5 | 41.63  | 2.85 |
| -6 | 11 | -5 | 38.48  | 2.73 |
| -6 | 11 | -5 | 39.57  | 2.99 |
| -6 | 11 | -5 | 40.00  | 1.88 |
| -6 | 11 | -5 | 41.82  | 3.19 |
| -6 | 11 | -4 | 1.52   | 1.30 |
| -6 | 11 | -4 | 2.37   | 0.72 |
| -6 | 11 | -4 | 2.22   | 1.42 |
| -6 | 11 | -4 | 1.20   | 1.13 |
| -6 | 11 | -4 | 1.19   | 1.37 |
| -6 | 11 | -4 | 2.37   | 0.84 |
| -6 | 11 | -3 | 100.39 | 2.97 |
| -6 | 11 | -3 | 100.04 | 4.80 |
| -6 | 11 | -3 | 96.29  | 4.77 |
| -6 | 11 | -3 | 93.99  | 4.52 |
| -6 | 11 | -3 | 93.04  | 4.24 |
| -6 | 11 | -3 | 88.37  | 4.21 |
| -6 | 11 | -3 | 98.47  | 3.09 |
| -6 | 11 | -3 | 102.35 | 4.78 |
| -6 | 11 | -2 | 113.27 | 4.61 |
| -6 | 11 | -2 | 134.15 | 5.54 |
| -6 | 11 | -2 | 122.12 | 4.33 |
| -6 | 11 | -2 | 115.89 | 4.87 |
| -6 | 11 | -2 | 130.95 | 4.71 |
| -6 | 11 | -2 | 130.78 | 5.23 |
| -6 | 11 | -2 | 130.18 | 5.71 |
| -6 | 11 | -2 | 126.96 | 5.28 |
| -6 | 11 | -1 | 325.57 | 7.90 |
| -6 | 11 | -1 | 332.82 | 8.47 |
| -6 | 11 | -1 | 335.95 | 7.75 |
| -6 | 11 | -1 | 345.47 | 8.62 |
| -6 | 11 | -1 | 331.06 | 7.10 |
| -6 | 11 | 0  | 99.25  | 5.07 |
| -6 | 11 | 0  | 107.14 | 4.53 |
| -6 | 11 | 0  | 101.95 | 4.48 |
| -6 | 11 | 0  | 103.23 | 4.68 |

## CIF 31

|    |    |    |        |      |
|----|----|----|--------|------|
| -6 | 11 | 0  | 108.20 | 4.83 |
| -6 | 11 | 0  | 99.50  | 4.36 |
| -6 | 11 | 0  | 106.91 | 4.14 |
| -6 | 11 | 1  | 105.98 | 4.96 |
| -6 | 11 | 1  | 101.14 | 4.16 |
| -6 | 11 | 1  | 100.21 | 4.35 |
| -6 | 11 | 1  | 110.62 | 4.75 |
| -6 | 11 | 1  | 109.68 | 4.67 |
| -6 | 11 | 1  | 98.68  | 4.19 |
| -6 | 11 | 1  | 96.13  | 4.48 |
| -6 | 11 | 1  | 99.56  | 3.90 |
| -6 | 11 | 2  | 271.71 | 7.11 |
| -6 | 11 | 2  | 255.35 | 6.09 |
| -6 | 11 | 2  | 270.67 | 7.23 |
| -6 | 11 | 2  | 275.58 | 7.33 |
| -6 | 11 | 2  | 292.22 | 7.19 |
| -6 | 11 | 2  | 266.98 | 7.71 |
| -6 | 11 | 2  | 280.36 | 7.41 |
| -6 | 11 | 2  | 283.94 | 6.87 |
| -6 | 11 | 3  | 170.63 | 5.46 |
| -6 | 11 | 3  | 168.11 | 5.63 |
| -6 | 11 | 3  | 193.06 | 5.52 |
| -6 | 11 | 3  | 185.96 | 5.45 |
| -6 | 11 | 3  | 184.42 | 5.76 |
| -6 | 11 | 3  | 186.48 | 5.84 |
| -6 | 11 | 3  | 201.39 | 5.83 |
| -6 | 11 | 4  | 23.07  | 1.66 |
| -6 | 11 | 4  | 21.37  | 1.79 |
| -6 | 11 | 4  | 25.78  | 1.87 |
| -6 | 11 | 4  | 23.74  | 2.00 |
| -6 | 11 | 4  | 24.69  | 2.14 |
| -6 | 11 | 4  | 29.84  | 2.28 |
| -6 | 11 | 5  | 24.57  | 1.75 |
| -6 | 11 | 5  | 27.68  | 2.11 |
| -6 | 11 | 5  | 28.78  | 2.08 |
| -6 | 11 | 6  | 19.64  | 1.56 |
| -6 | 11 | 6  | 21.23  | 1.61 |
| -6 | 12 | -7 | 3.82   | 0.44 |
| -6 | 12 | -7 | 3.52   | 0.84 |
| -6 | 12 | -6 | 49.70  | 1.52 |
| -6 | 12 | -6 | 46.43  | 2.53 |

## CIF 31

|    |    |    |        |      |
|----|----|----|--------|------|
| -6 | 12 | -5 | 2.18   | 0.98 |
| -6 | 12 | -5 | 2.03   | 1.02 |
| -6 | 12 | -5 | 1.99   | 1.16 |
| -6 | 12 | -4 | 145.84 | 4.99 |
| -6 | 12 | -4 | 163.43 | 4.98 |
| -6 | 12 | -3 | 62.48  | 3.30 |
| -6 | 12 | -3 | 61.46  | 3.44 |
| -6 | 12 | -3 | 63.72  | 3.36 |
| -6 | 12 | -3 | 65.20  | 1.92 |
| -6 | 12 | -2 | 7.36   | 1.56 |
| -6 | 12 | -2 | 6.18   | 1.42 |
| -6 | 12 | -2 | 7.00   | 1.58 |
| -6 | 12 | -2 | 3.42   | 0.63 |
| -6 | 12 | -2 | 4.67   | 1.17 |
| -6 | 12 | -1 | 447.57 | 5.96 |
| -6 | 12 | -1 | 436.95 | 8.72 |
| -6 | 12 | -1 | 431.76 | 8.82 |
| -6 | 12 | -1 | 450.24 | 8.14 |
| -6 | 12 | 0  | 5.99   | 1.50 |
| -6 | 12 | 0  | 6.79   | 1.09 |
| -6 | 12 | 0  | 5.98   | 1.40 |
| -6 | 12 | 0  | 8.80   | 1.37 |
| -6 | 12 | 0  | 7.21   | 1.36 |
| -6 | 12 | 0  | 6.93   | 1.21 |
| -6 | 12 | 0  | 8.72   | 0.81 |
| -6 | 12 | 0  | 9.05   | 1.39 |
| -6 | 12 | 1  | 113.84 | 4.02 |
| -6 | 12 | 1  | 123.60 | 4.25 |
| -6 | 12 | 1  | 115.31 | 4.44 |
| -6 | 12 | 1  | 129.21 | 4.30 |
| -6 | 12 | 1  | 122.27 | 3.74 |
| -6 | 12 | 2  | 129.33 | 3.84 |
| -6 | 12 | 2  | 121.12 | 3.88 |
| -6 | 12 | 2  | 124.79 | 4.19 |
| -6 | 12 | 3  | 2.83   | 0.79 |
| -6 | 12 | 3  | 4.88   | 1.17 |
| -6 | 12 | 3  | 3.84   | 0.74 |
| -6 | 12 | 4  | 242.79 | 4.84 |
| -6 | 13 | -4 | 44.59  | 1.95 |
| -6 | 13 | -4 | 47.22  | 2.17 |
| -6 | 13 | -4 | 43.98  | 2.06 |

## CIF 31

|    |    |    |        |      |
|----|----|----|--------|------|
| -6 | 13 | -3 | 0.08   | 0.64 |
| -6 | 13 | -3 | 0.25   | 0.76 |
| -6 | 13 | -3 | 0.83   | 0.72 |
| -6 | 13 | -2 | 38.27  | 2.20 |
| -6 | 13 | -2 | 37.96  | 1.95 |
| -6 | 13 | -2 | 38.10  | 2.08 |
| -6 | 13 | -1 | 84.24  | 3.16 |
| -6 | 13 | -1 | 90.44  | 3.03 |
| -6 | 13 | 0  | 4.13   | 0.83 |
| -6 | 13 | 0  | 3.74   | 0.91 |
| -6 | 13 | 1  | 84.59  | 2.46 |
| -5 | -9 | 1  | -0.10  | 0.36 |
| -5 | -9 | 1  | 0.17   | 0.35 |
| -5 | -9 | 2  | 25.46  | 1.10 |
| -5 | -9 | 2  | 27.80  | 1.24 |
| -5 | -9 | 3  | 11.04  | 0.83 |
| -5 | -9 | 4  | 24.42  | 1.10 |
| -5 | -9 | 4  | 28.10  | 1.41 |
| -5 | -9 | 5  | 77.78  | 2.83 |
| -5 | -9 | 5  | 67.77  | 1.68 |
| -5 | -9 | 6  | 16.96  | 1.09 |
| -5 | -9 | 6  | 17.28  | 1.48 |
| -5 | -9 | 7  | 167.05 | 4.06 |
| -5 | -9 | 7  | 170.50 | 3.15 |
| -5 | -9 | 7  | 176.99 | 4.23 |
| -5 | -9 | 7  | 175.39 | 4.15 |
| -5 | -9 | 8  | 1.05   | 0.70 |
| -5 | -9 | 8  | 0.36   | 0.68 |
| -5 | -9 | 8  | 0.51   | 0.62 |
| -5 | -9 | 8  | 0.91   | 0.35 |
| -5 | -9 | 9  | 34.22  | 1.58 |
| -5 | -9 | 9  | 33.72  | 1.13 |
| -5 | -9 | 10 | 4.21   | 0.63 |
| -5 | -8 | -1 | 136.94 | 3.00 |
| -5 | -8 | -1 | 134.79 | 2.83 |
| -5 | -8 | 0  | 24.21  | 1.41 |
| -5 | -8 | 0  | 23.61  | 1.36 |
| -5 | -8 | 1  | 16.11  | 1.27 |
| -5 | -8 | 1  | 15.76  | 1.27 |
| -5 | -8 | 2  | 36.49  | 1.86 |
| -5 | -8 | 3  | 3.57   | 0.84 |



## CIF 31

|    |    |    |        |       |
|----|----|----|--------|-------|
| -5 | -8 | 4  | 652.20 | 8.98  |
| -5 | -8 | 4  | 736.47 | 9.72  |
| -5 | -8 | 4  | 653.19 | 10.70 |
| -5 | -8 | 4  | 732.59 | 9.81  |
| -5 | -8 | 5  | 4.09   | 0.77  |
| -5 | -8 | 5  | 2.22   | 1.11  |
| -5 | -8 | 5  | 3.19   | 1.21  |
| -5 | -8 | 5  | 5.41   | 1.05  |
| -5 | -8 | 6  | 392.36 | 7.80  |
| -5 | -8 | 6  | 376.49 | 7.90  |
| -5 | -8 | 7  | 80.76  | 2.71  |
| -5 | -8 | 7  | 91.31  | 3.58  |
| -5 | -8 | 7  | 82.53  | 3.62  |
| -5 | -8 | 7  | 86.47  | 3.60  |
| -5 | -8 | 8  | 387.08 | 7.44  |
| -5 | -8 | 8  | 365.95 | 7.37  |
| -5 | -8 | 8  | 380.75 | 5.67  |
| -5 | -8 | 8  | 388.65 | 7.68  |
| -5 | -8 | 9  | 9.11   | 1.39  |
| -5 | -8 | 9  | 6.47   | 0.85  |
| -5 | -8 | 9  | 9.07   | 1.32  |
| -5 | -8 | 10 | 8.22   | 1.15  |
| -5 | -8 | 10 | 6.64   | 0.65  |
| -5 | -8 | 10 | 8.56   | 1.18  |
| -5 | -8 | 11 | 62.11  | 2.29  |
| -5 | -8 | 11 | 60.83  | 2.39  |
| -5 | -8 | 12 | 2.69   | 0.63  |
| -5 | -7 | -3 | 37.87  | 1.64  |
| -5 | -7 | -3 | 32.97  | 1.32  |
| -5 | -7 | -2 | 75.30  | 2.40  |
| -5 | -7 | -1 | 48.52  | 2.16  |
| -5 | -7 | -1 | 48.44  | 2.26  |
| -5 | -7 | 0  | 49.26  | 2.38  |
| -5 | -7 | 0  | 50.45  | 2.36  |
| -5 | -7 | 1  | 10.47  | 1.32  |
| -5 | -7 | 1  | 7.14   | 1.54  |
| -5 | -7 | 1  | 10.76  | 1.38  |
| -5 | -7 | 2  | 12.21  | 1.28  |
| -5 | -7 | 2  | 11.98  | 1.40  |
| -5 | -7 | 2  | 12.33  | 1.87  |
| -5 | -7 | 3  | 49.55  | 3.23  |

## CIF 31

|    |    |    |        |       |
|----|----|----|--------|-------|
| -5 | -7 | 3  | 45.54  | 3.08  |
| -5 | -7 | 3  | 52.29  | 3.08  |
| -5 | -7 | 4  | 151.59 | 4.12  |
| -5 | -7 | 4  | 162.81 | 4.45  |
| -5 | -7 | 4  | 167.23 | 5.63  |
| -5 | -7 | 4  | 159.22 | 5.34  |
| -5 | -7 | 5  | 101.41 | 3.21  |
| -5 | -7 | 5  | 89.39  | 4.25  |
| -5 | -7 | 5  | 93.56  | 3.35  |
| -5 | -7 | 5  | 99.27  | 4.26  |
| -5 | -7 | 5  | 98.49  | 3.46  |
| -5 | -7 | 6  | 33.82  | 1.76  |
| -5 | -7 | 6  | 32.98  | 2.59  |
| -5 | -7 | 6  | 36.69  | 2.14  |
| -5 | -7 | 6  | 31.82  | 2.04  |
| -5 | -7 | 6  | 34.78  | 2.15  |
| -5 | -7 | 7  | 5.23   | 1.09  |
| -5 | -7 | 7  | 3.14   | 1.25  |
| -5 | -7 | 7  | 2.24   | 1.29  |
| -5 | -7 | 7  | 1.93   | 1.37  |
| -5 | -7 | 7  | 2.58   | 1.26  |
| -5 | -7 | 7  | 3.74   | 0.97  |
| -5 | -7 | 7  | 1.63   | 0.89  |
| -5 | -7 | 8  | 936.45 | 13.92 |
| -5 | -7 | 8  | 970.93 | 14.67 |
| -5 | -7 | 8  | 965.09 | 12.71 |
| -5 | -7 | 8  | 942.68 | 14.15 |
| -5 | -7 | 9  | 142.05 | 4.41  |
| -5 | -7 | 9  | 176.70 | 5.30  |
| -5 | -7 | 9  | 174.65 | 4.39  |
| -5 | -7 | 9  | 170.50 | 5.24  |
| -5 | -7 | 9  | 152.24 | 4.82  |
| -5 | -7 | 9  | 193.34 | 5.01  |
| -5 | -7 | 10 | 432.14 | 7.71  |
| -5 | -7 | 10 | 429.32 | 8.19  |
| -5 | -7 | 10 | 407.54 | 6.99  |
| -5 | -7 | 10 | 392.97 | 7.70  |
| -5 | -7 | 11 | 273.68 | 5.89  |
| -5 | -7 | 11 | 274.61 | 6.05  |
| -5 | -7 | 12 | 55.58  | 2.45  |
| -5 | -7 | 12 | 53.68  | 2.28  |

## CIF 31

|    |    |    |        |       |
|----|----|----|--------|-------|
| -5 | -7 | 13 | 27.03  | 1.51  |
| -5 | -7 | 13 | 14.86  | 0.97  |
| -5 | -6 | -5 | 17.95  | 1.10  |
| -5 | -6 | -4 | 159.67 | 3.74  |
| -5 | -6 | -4 | 151.08 | 3.24  |
| -5 | -6 | -4 | 152.47 | 3.48  |
| -5 | -6 | -3 | 45.50  | 2.07  |
| -5 | -6 | -3 | 43.63  | 2.21  |
| -5 | -6 | -3 | 40.83  | 1.85  |
| -5 | -6 | -3 | 46.04  | 2.07  |
| -5 | -6 | -2 | 153.99 | 3.97  |
| -5 | -6 | -2 | 152.43 | 3.76  |
| -5 | -6 | -2 | 163.62 | 4.23  |
| -5 | -6 | -1 | 6.66   | 1.00  |
| -5 | -6 | -1 | 7.89   | 1.37  |
| -5 | -6 | -1 | 8.47   | 1.14  |
| -5 | -6 | -1 | 8.48   | 1.27  |
| -5 | -6 | 0  | 67.90  | 3.03  |
| -5 | -6 | 0  | 66.04  | 2.98  |
| -5 | -6 | 0  | 68.32  | 3.69  |
| -5 | -6 | 0  | 70.23  | 2.66  |
| -5 | -6 | 1  | 227.57 | 5.18  |
| -5 | -6 | 1  | 225.01 | 5.52  |
| -5 | -6 | 1  | 194.67 | 6.35  |
| -5 | -6 | 1  | 211.00 | 6.50  |
| -5 | -6 | 1  | 204.82 | 4.48  |
| -5 | -6 | 2  | 435.87 | 7.92  |
| -5 | -6 | 2  | 407.62 | 9.05  |
| -5 | -6 | 2  | 418.65 | 9.53  |
| -5 | -6 | 2  | 418.64 | 9.57  |
| -5 | -6 | 2  | 422.15 | 7.66  |
| -5 | -6 | 3  | 59.74  | 2.81  |
| -5 | -6 | 3  | 53.98  | 3.23  |
| -5 | -6 | 3  | 51.52  | 3.33  |
| -5 | -6 | 3  | 53.15  | 2.59  |
| -5 | -6 | 3  | 61.09  | 2.83  |
| -5 | -6 | 3  | 53.75  | 3.41  |
| -5 | -6 | 4  | 827.95 | 11.66 |
| -5 | -6 | 4  | 838.60 | 14.82 |
| -5 | -6 | 4  | 905.81 | 12.49 |
| -5 | -6 | 4  | 851.44 | 14.25 |

## CIF 31

|    |    |   |        |       |
|----|----|---|--------|-------|
| -5 | -6 | 4 | 874.45 | 14.08 |
| -5 | -6 | 4 | 809.91 | 13.86 |
| -5 | -6 | 4 | 832.57 | 12.18 |
| -5 | -6 | 4 | 908.19 | 14.75 |
| -5 | -6 | 4 | 869.16 | 14.44 |
| -5 | -6 | 4 | 828.52 | 11.94 |
| -5 | -6 | 5 | 202.82 | 4.76  |
| -5 | -6 | 5 | 213.62 | 6.51  |
| -5 | -6 | 5 | 206.76 | 6.29  |
| -5 | -6 | 5 | 209.40 | 6.63  |
| -5 | -6 | 5 | 215.92 | 6.60  |
| -5 | -6 | 5 | 207.82 | 5.47  |
| -5 | -6 | 5 | 209.61 | 6.46  |
| -5 | -6 | 5 | 199.86 | 5.18  |
| -5 | -6 | 6 | 19.77  | 1.69  |
| -5 | -6 | 6 | 23.79  | 2.37  |
| -5 | -6 | 6 | 21.04  | 2.30  |
| -5 | -6 | 6 | 19.61  | 1.73  |
| -5 | -6 | 6 | 22.43  | 2.27  |
| -5 | -6 | 6 | 18.27  | 2.06  |
| -5 | -6 | 6 | 19.39  | 1.81  |
| -5 | -6 | 7 | 3.59   | 1.31  |
| -5 | -6 | 7 | 5.22   | 1.08  |
| -5 | -6 | 7 | 2.40   | 1.45  |
| -5 | -6 | 7 | 4.27   | 1.43  |
| -5 | -6 | 7 | 3.64   | 1.00  |
| -5 | -6 | 7 | 3.71   | 1.15  |
| -5 | -6 | 7 | 4.65   | 1.28  |
| -5 | -6 | 8 | 19.92  | 1.74  |
| -5 | -6 | 8 | 17.60  | 1.54  |
| -5 | -6 | 8 | 20.50  | 2.02  |
| -5 | -6 | 8 | 23.57  | 2.33  |
| -5 | -6 | 8 | 17.66  | 1.81  |
| -5 | -6 | 8 | 20.21  | 2.05  |
| -5 | -6 | 8 | 23.19  | 2.23  |
| -5 | -6 | 9 | 132.23 | 4.38  |
| -5 | -6 | 9 | 122.08 | 4.57  |
| -5 | -6 | 9 | 131.71 | 4.12  |
| -5 | -6 | 9 | 131.25 | 4.49  |
| -5 | -6 | 9 | 122.09 | 3.76  |
| -5 | -6 | 9 | 125.00 | 4.59  |

## CIF 31

|    |    |    |        |      |
|----|----|----|--------|------|
| -5 | -6 | 9  | 126.38 | 4.73 |
| -5 | -6 | 10 | 111.03 | 4.11 |
| -5 | -6 | 10 | 103.88 | 4.06 |
| -5 | -6 | 10 | 100.92 | 3.86 |
| -5 | -6 | 10 | 102.56 | 3.43 |
| -5 | -6 | 10 | 100.16 | 3.48 |
| -5 | -6 | 10 | 107.11 | 4.26 |
| -5 | -6 | 10 | 112.63 | 4.26 |
| -5 | -6 | 11 | 29.80  | 2.14 |
| -5 | -6 | 11 | 34.64  | 2.34 |
| -5 | -6 | 11 | 35.63  | 2.34 |
| -5 | -6 | 11 | 30.85  | 2.34 |
| -5 | -6 | 11 | 38.58  | 2.06 |
| -5 | -6 | 11 | 33.38  | 1.96 |
| -5 | -6 | 11 | 37.16  | 2.26 |
| -5 | -6 | 12 | 1.98   | 1.02 |
| -5 | -6 | 12 | 1.60   | 0.74 |
| -5 | -6 | 12 | 4.95   | 1.19 |
| -5 | -6 | 12 | 2.41   | 1.02 |
| -5 | -6 | 13 | 41.47  | 2.08 |
| -5 | -6 | 13 | 43.18  | 1.77 |
| -5 | -6 | 13 | 47.62  | 2.18 |
| -5 | -6 | 14 | 73.19  | 2.06 |
| -5 | -6 | 14 | 90.92  | 2.42 |
| -5 | -5 | -6 | 12.65  | 1.01 |
| -5 | -5 | -6 | 12.58  | 1.06 |
| -5 | -5 | -5 | 276.00 | 5.35 |
| -5 | -5 | -5 | 277.36 | 5.28 |
| -5 | -5 | -5 | 277.01 | 5.08 |
| -5 | -5 | -4 | 164.54 | 4.43 |
| -5 | -5 | -4 | 152.20 | 4.00 |
| -5 | -5 | -4 | 149.70 | 4.16 |
| -5 | -5 | -4 | 158.14 | 3.98 |
| -5 | -5 | -3 | 21.22  | 1.75 |
| -5 | -5 | -3 | 21.91  | 1.68 |
| -5 | -5 | -3 | 21.41  | 1.69 |
| -5 | -5 | -2 | 140.99 | 4.23 |
| -5 | -5 | -2 | 146.62 | 4.15 |
| -5 | -5 | -2 | 147.65 | 4.35 |
| -5 | -5 | -1 | 74.36  | 2.96 |
| -5 | -5 | -1 | 79.53  | 3.16 |

## CIF 31

|    |    |    |        |      |
|----|----|----|--------|------|
| -5 | -5 | -1 | 81.47  | 3.36 |
| -5 | -5 | 0  | 84.10  | 3.12 |
| -5 | -5 | 0  | 96.88  | 3.70 |
| -5 | -5 | 0  | 96.40  | 4.39 |
| -5 | -5 | 0  | 101.73 | 3.39 |
| -5 | -5 | 0  | 92.17  | 4.28 |
| -5 | -5 | 0  | 98.86  | 3.64 |
| -5 | -5 | 0  | 93.07  | 3.31 |
| -5 | -5 | 1  | 3.25   | 1.43 |
| -5 | -5 | 1  | 1.42   | 0.93 |
| -5 | -5 | 1  | 0.89   | 1.17 |
| -5 | -5 | 1  | 1.00   | 1.20 |
| -5 | -5 | 1  | 1.56   | 0.80 |
| -5 | -5 | 1  | 1.01   | 0.76 |
| -5 | -5 | 1  | 1.64   | 0.77 |
| -5 | -5 | 2  | 157.80 | 4.53 |
| -5 | -5 | 2  | 144.63 | 5.31 |
| -5 | -5 | 2  | 145.03 | 5.18 |
| -5 | -5 | 2  | 162.91 | 4.53 |
| -5 | -5 | 2  | 140.57 | 5.57 |
| -5 | -5 | 2  | 159.52 | 5.53 |
| -5 | -5 | 3  | 71.09  | 3.83 |
| -5 | -5 | 3  | 70.96  | 2.96 |
| -5 | -5 | 3  | 72.69  | 3.05 |
| -5 | -5 | 3  | 68.98  | 3.67 |
| -5 | -5 | 3  | 67.21  | 3.00 |
| -5 | -5 | 3  | 66.87  | 3.57 |
| -5 | -5 | 3  | 66.54  | 3.92 |
| -5 | -5 | 3  | 78.62  | 4.06 |
| -5 | -5 | 4  | 45.22  | 2.46 |
| -5 | -5 | 4  | 49.52  | 3.32 |
| -5 | -5 | 4  | 49.86  | 2.47 |
| -5 | -5 | 4  | 48.26  | 3.09 |
| -5 | -5 | 4  | 48.97  | 3.06 |
| -5 | -5 | 4  | 45.63  | 2.28 |
| -5 | -5 | 4  | 50.23  | 2.65 |
| -5 | -5 | 4  | 52.59  | 3.20 |
| -5 | -5 | 4  | 57.24  | 3.60 |
| -5 | -5 | 5  | 213.96 | 4.79 |
| -5 | -5 | 5  | 207.47 | 6.25 |
| -5 | -5 | 5  | 209.97 | 6.39 |

## CIF 31

|    |    |    |         |       |
|----|----|----|---------|-------|
| -5 | -5 | 5  | 223.84  | 5.79  |
| -5 | -5 | 5  | 210.21  | 5.18  |
| -5 | -5 | 5  | 207.27  | 6.53  |
| -5 | -5 | 5  | 207.60  | 6.66  |
| -5 | -5 | 5  | 188.25  | 5.92  |
| -5 | -5 | 5  | 211.66  | 6.28  |
| -5 | -5 | 6  | 1573.84 | 20.89 |
| -5 | -5 | 6  | 1593.46 | 20.80 |
| -5 | -5 | 6  | 1577.28 | 19.96 |
| -5 | -5 | 6  | 1465.01 | 17.70 |
| -5 | -5 | 6  | 1549.56 | 20.26 |
| -5 | -5 | 6  | 1472.79 | 17.00 |
| -5 | -5 | 6  | 1572.51 | 19.08 |
| -5 | -5 | 7  | 1382.32 | 19.38 |
| -5 | -5 | 7  | 1378.09 | 16.65 |
| -5 | -5 | 7  | 1375.40 | 17.89 |
| -5 | -5 | 7  | 1408.68 | 16.59 |
| -5 | -5 | 7  | 1342.96 | 16.69 |
| -5 | -5 | 7  | 1366.10 | 18.10 |
| -5 | -5 | 8  | 46.29   | 2.80  |
| -5 | -5 | 8  | 50.40   | 3.09  |
| -5 | -5 | 8  | 45.30   | 2.34  |
| -5 | -5 | 8  | 49.55   | 2.62  |
| -5 | -5 | 8  | 50.22   | 2.93  |
| -5 | -5 | 8  | 50.38   | 2.47  |
| -5 | -5 | 8  | 47.90   | 2.51  |
| -5 | -5 | 8  | 46.37   | 2.35  |
| -5 | -5 | 8  | 52.91   | 3.29  |
| -5 | -5 | 8  | 50.90   | 3.04  |
| -5 | -5 | 9  | 562.56  | 9.41  |
| -5 | -5 | 9  | 541.74  | 10.41 |
| -5 | -5 | 9  | 589.61  | 10.65 |
| -5 | -5 | 9  | 521.48  | 8.83  |
| -5 | -5 | 9  | 558.17  | 9.13  |
| -5 | -5 | 9  | 543.04  | 9.27  |
| -5 | -5 | 9  | 547.16  | 10.71 |
| -5 | -5 | 9  | 563.91  | 10.81 |
| -5 | -5 | 10 | 176.28  | 5.66  |
| -5 | -5 | 10 | 155.05  | 4.42  |
| -5 | -5 | 10 | 161.50  | 4.77  |
| -5 | -5 | 10 | 162.79  | 5.27  |

## CIF 31

|    |    |    |        |      |
|----|----|----|--------|------|
| -5 | -5 | 10 | 164.74 | 5.34 |
| -5 | -5 | 10 | 147.85 | 4.48 |
| -5 | -5 | 10 | 153.77 | 4.58 |
| -5 | -5 | 10 | 173.66 | 5.70 |
| -5 | -5 | 10 | 157.91 | 5.10 |
| -5 | -5 | 10 | 159.92 | 5.26 |
| -5 | -5 | 10 | 165.44 | 5.10 |
| -5 | -5 | 10 | 138.72 | 4.58 |
| -5 | -5 | 11 | 10.83  | 1.37 |
| -5 | -5 | 11 | 14.73  | 1.69 |
| -5 | -5 | 11 | 10.47  | 1.46 |
| -5 | -5 | 11 | 13.19  | 1.72 |
| -5 | -5 | 11 | 9.61   | 1.23 |
| -5 | -5 | 11 | 11.47  | 1.37 |
| -5 | -5 | 11 | 10.90  | 1.52 |
| -5 | -5 | 11 | 13.24  | 1.47 |
| -5 | -5 | 11 | 11.68  | 1.55 |
| -5 | -5 | 11 | 8.90   | 1.56 |
| -5 | -5 | 11 | 13.33  | 1.77 |
| -5 | -5 | 12 | -0.43  | 0.92 |
| -5 | -5 | 12 | 0.28   | 0.73 |
| -5 | -5 | 12 | 1.64   | 0.92 |
| -5 | -5 | 12 | 1.00   | 0.97 |
| -5 | -5 | 12 | 0.32   | 0.74 |
| -5 | -5 | 12 | 0.12   | 0.93 |
| -5 | -5 | 12 | 0.44   | 0.77 |
| -5 | -5 | 12 | 0.13   | 1.00 |
| -5 | -5 | 13 | 224.56 | 5.05 |
| -5 | -5 | 13 | 228.40 | 5.37 |
| -5 | -5 | 13 | 218.91 | 5.33 |
| -5 | -5 | 13 | 215.57 | 5.13 |
| -5 | -5 | 13 | 212.16 | 5.26 |
| -5 | -5 | 13 | 211.94 | 4.63 |
| -5 | -5 | 14 | 0.31   | 0.70 |
| -5 | -5 | 14 | 0.53   | 0.51 |
| -5 | -5 | 14 | 0.93   | 0.73 |
| -5 | -5 | 14 | 0.28   | 0.71 |
| -5 | -5 | 15 | 26.94  | 1.29 |
| -5 | -5 | 15 | 22.74  | 1.10 |
| -5 | -4 | -8 | 106.24 | 2.19 |
| -5 | -4 | -8 | 75.69  | 1.67 |



## CIF 31

|    |    |    |        |      |
|----|----|----|--------|------|
| -5 | -4 | -7 | 98.97  | 2.74 |
| -5 | -4 | -7 | 101.44 | 2.79 |
| -5 | -4 | -6 | 211.99 | 4.17 |
| -5 | -4 | -6 | 201.36 | 4.63 |
| -5 | -4 | -6 | 207.52 | 5.28 |
| -5 | -4 | -5 | 14.03  | 1.57 |
| -5 | -4 | -5 | 13.62  | 1.44 |
| -5 | -4 | -5 | 14.71  | 1.72 |
| -5 | -4 | -5 | 13.98  | 1.35 |
| -5 | -4 | -4 | 1.77   | 0.88 |
| -5 | -4 | -4 | 3.69   | 1.22 |
| -5 | -4 | -4 | 1.99   | 0.94 |
| -5 | -4 | -4 | 2.58   | 1.09 |
| -5 | -4 | -4 | 1.21   | 1.02 |
| -5 | -4 | -3 | 0.11   | 0.91 |
| -5 | -4 | -3 | -0.14  | 0.97 |
| -5 | -4 | -3 | -0.29  | 0.83 |
| -5 | -4 | -3 | 0.27   | 0.96 |
| -5 | -4 | -2 | 1.31   | 0.99 |
| -5 | -4 | -2 | 3.29   | 1.20 |
| -5 | -4 | -2 | 0.54   | 0.82 |
| -5 | -4 | -2 | 1.74   | 0.93 |
| -5 | -4 | -1 | 9.75   | 1.45 |
| -5 | -4 | -1 | 9.60   | 1.44 |
| -5 | -4 | -1 | 6.65   | 1.56 |
| -5 | -4 | -1 | 8.79   | 1.36 |
| -5 | -4 | 0  | 347.53 | 6.81 |
| -5 | -4 | 0  | 354.32 | 8.28 |
| -5 | -4 | 0  | 348.42 | 8.27 |
| -5 | -4 | 0  | 357.34 | 6.68 |
| -5 | -4 | 0  | 346.71 | 6.70 |
| -5 | -4 | 0  | 354.43 | 8.02 |
| -5 | -4 | 1  | 91.89  | 3.34 |
| -5 | -4 | 1  | 76.03  | 3.59 |
| -5 | -4 | 1  | 97.25  | 3.34 |
| -5 | -4 | 1  | 78.99  | 3.85 |
| -5 | -4 | 1  | 83.18  | 3.04 |
| -5 | -4 | 1  | 80.84  | 2.94 |
| -5 | -4 | 1  | 76.01  | 4.07 |
| -5 | -4 | 1  | 77.57  | 3.81 |
| -5 | -4 | 2  | 217.83 | 5.10 |

## CIF 31

|    |    |   |        |      |
|----|----|---|--------|------|
| -5 | -4 | 2 | 194.78 | 6.39 |
| -5 | -4 | 2 | 232.66 | 5.27 |
| -5 | -4 | 2 | 196.35 | 5.87 |
| -5 | -4 | 2 | 215.13 | 5.98 |
| -5 | -4 | 2 | 218.35 | 6.24 |
| -5 | -4 | 2 | 220.12 | 5.31 |
| -5 | -4 | 2 | 212.78 | 4.62 |
| -5 | -4 | 2 | 203.54 | 6.53 |
| -5 | -4 | 3 | 5.26   | 1.01 |
| -5 | -4 | 3 | 3.99   | 1.46 |
| -5 | -4 | 3 | 5.37   | 0.97 |
| -5 | -4 | 3 | 5.72   | 1.37 |
| -5 | -4 | 3 | 4.07   | 1.16 |
| -5 | -4 | 3 | 4.86   | 1.11 |
| -5 | -4 | 3 | 5.00   | 1.31 |
| -5 | -4 | 4 | 22.78  | 2.28 |
| -5 | -4 | 4 | 23.04  | 2.10 |
| -5 | -4 | 4 | 23.48  | 2.09 |
| -5 | -4 | 4 | 22.99  | 2.10 |
| -5 | -4 | 4 | 22.61  | 2.28 |
| -5 | -4 | 4 | 27.30  | 1.59 |
| -5 | -4 | 4 | 24.12  | 2.07 |
| -5 | -4 | 4 | 27.24  | 2.03 |
| -5 | -4 | 5 | 157.99 | 5.48 |
| -5 | -4 | 5 | 136.82 | 4.02 |
| -5 | -4 | 5 | 132.29 | 3.56 |
| -5 | -4 | 5 | 129.89 | 3.76 |
| -5 | -4 | 5 | 140.89 | 4.91 |
| -5 | -4 | 5 | 151.45 | 5.13 |
| -5 | -4 | 5 | 133.81 | 4.71 |
| -5 | -4 | 5 | 139.88 | 4.47 |
| -5 | -4 | 5 | 139.69 | 4.77 |
| -5 | -4 | 6 | 57.92  | 3.01 |
| -5 | -4 | 6 | 58.28  | 2.59 |
| -5 | -4 | 6 | 58.64  | 3.21 |
| -5 | -4 | 6 | 57.02  | 2.59 |
| -5 | -4 | 6 | 55.58  | 2.53 |
| -5 | -4 | 6 | 55.07  | 3.13 |
| -5 | -4 | 6 | 60.20  | 2.52 |
| -5 | -4 | 6 | 59.45  | 3.00 |
| -5 | -4 | 6 | 56.13  | 3.21 |

## CIF 31

|    |    |    |        |       |
|----|----|----|--------|-------|
| -5 | -4 | 6  | 56.64  | 3.18  |
| -5 | -4 | 6  | 63.37  | 3.55  |
| -5 | -4 | 7  | 305.90 | 6.16  |
| -5 | -4 | 7  | 293.17 | 6.97  |
| -5 | -4 | 7  | 286.42 | 7.35  |
| -5 | -4 | 7  | 294.61 | 7.68  |
| -5 | -4 | 7  | 305.01 | 6.86  |
| -5 | -4 | 7  | 301.33 | 6.91  |
| -5 | -4 | 7  | 290.00 | 6.08  |
| -5 | -4 | 7  | 289.42 | 6.14  |
| -5 | -4 | 7  | 290.52 | 7.20  |
| -5 | -4 | 7  | 276.98 | 7.06  |
| -5 | -4 | 7  | 288.55 | 5.85  |
| -5 | -4 | 7  | 278.98 | 6.87  |
| -5 | -4 | 7  | 289.35 | 6.25  |
| -5 | -4 | 8  | 81.11  | 3.22  |
| -5 | -4 | 8  | 82.11  | 3.30  |
| -5 | -4 | 8  | 71.10  | 3.36  |
| -5 | -4 | 8  | 72.93  | 3.43  |
| -5 | -4 | 8  | 67.62  | 3.64  |
| -5 | -4 | 8  | 66.72  | 2.83  |
| -5 | -4 | 8  | 70.02  | 3.59  |
| -5 | -4 | 8  | 69.58  | 3.55  |
| -5 | -4 | 8  | 70.84  | 3.03  |
| -5 | -4 | 8  | 70.63  | 3.47  |
| -5 | -4 | 8  | 70.84  | 3.51  |
| -5 | -4 | 9  | 827.43 | 13.11 |
| -5 | -4 | 9  | 794.58 | 12.95 |
| -5 | -4 | 9  | 813.86 | 13.00 |
| -5 | -4 | 9  | 807.21 | 12.66 |
| -5 | -4 | 9  | 814.51 | 13.46 |
| -5 | -4 | 9  | 775.55 | 11.50 |
| -5 | -4 | 9  | 800.14 | 12.72 |
| -5 | -4 | 9  | 837.09 | 13.69 |
| -5 | -4 | 9  | 776.74 | 11.75 |
| -5 | -4 | 9  | 788.46 | 11.98 |
| -5 | -4 | 9  | 853.27 | 12.45 |
| -5 | -4 | 10 | 101.61 | 4.39  |
| -5 | -4 | 10 | 120.58 | 4.43  |
| -5 | -4 | 10 | 102.06 | 4.36  |
| -5 | -4 | 10 | 110.65 | 4.64  |

## CIF 31

|    |    |    |        |      |
|----|----|----|--------|------|
| -5 | -4 | 10 | 107.35 | 4.27 |
| -5 | -4 | 10 | 116.49 | 4.10 |
| -5 | -4 | 10 | 98.04  | 3.70 |
| -5 | -4 | 10 | 97.51  | 3.60 |
| -5 | -4 | 10 | 103.32 | 4.25 |
| -5 | -4 | 10 | 94.28  | 3.94 |
| -5 | -4 | 10 | 103.53 | 4.32 |
| -5 | -4 | 10 | 106.75 | 4.12 |
| -5 | -4 | 10 | 117.93 | 4.25 |
| -5 | -4 | 11 | 4.06   | 1.03 |
| -5 | -4 | 11 | 7.25   | 1.58 |
| -5 | -4 | 11 | 6.89   | 1.45 |
| -5 | -4 | 11 | 5.42   | 1.49 |
| -5 | -4 | 11 | 6.63   | 1.38 |
| -5 | -4 | 11 | 6.15   | 1.23 |
| -5 | -4 | 11 | 5.59   | 1.11 |
| -5 | -4 | 11 | 6.08   | 1.25 |
| -5 | -4 | 11 | 5.45   | 1.44 |
| -5 | -4 | 11 | 4.35   | 1.08 |
| -5 | -4 | 11 | 5.82   | 1.36 |
| -5 | -4 | 11 | 7.49   | 1.49 |
| -5 | -4 | 11 | 4.81   | 1.17 |
| -5 | -4 | 12 | 5.15   | 1.15 |
| -5 | -4 | 12 | 5.64   | 1.14 |
| -5 | -4 | 12 | 6.45   | 1.27 |
| -5 | -4 | 12 | 6.83   | 1.36 |
| -5 | -4 | 12 | 5.35   | 1.21 |
| -5 | -4 | 12 | 4.75   | 1.10 |
| -5 | -4 | 12 | 5.27   | 1.48 |
| -5 | -4 | 12 | 4.20   | 1.35 |
| -5 | -4 | 12 | 6.64   | 1.33 |
| -5 | -4 | 12 | 5.83   | 1.13 |
| -5 | -4 | 12 | 5.44   | 1.05 |
| -5 | -4 | 12 | 6.71   | 1.52 |
| -5 | -4 | 12 | 5.25   | 1.39 |
| -5 | -4 | 13 | 291.09 | 6.61 |
| -5 | -4 | 13 | 283.76 | 6.16 |
| -5 | -4 | 13 | 230.91 | 5.85 |
| -5 | -4 | 13 | 289.41 | 6.41 |
| -5 | -4 | 13 | 256.45 | 6.20 |
| -5 | -4 | 13 | 288.96 | 5.81 |

## CIF 31

|    |    |    |        |       |
|----|----|----|--------|-------|
| -5 | -4 | 13 | 264.96 | 6.10  |
| -5 | -4 | 13 | 259.46 | 5.49  |
| -5 | -4 | 13 | 263.07 | 6.19  |
| -5 | -4 | 13 | 295.39 | 6.60  |
| -5 | -4 | 14 | 19.35  | 1.55  |
| -5 | -4 | 14 | 19.14  | 1.59  |
| -5 | -4 | 14 | 18.91  | 1.53  |
| -5 | -4 | 14 | 18.76  | 1.34  |
| -5 | -4 | 14 | 19.55  | 1.61  |
| -5 | -4 | 15 | 95.21  | 2.71  |
| -5 | -4 | 15 | 90.00  | 2.60  |
| -5 | -4 | 15 | 97.47  | 2.72  |
| -5 | -3 | -9 | 9.94   | 0.69  |
| -5 | -3 | -9 | 5.18   | 0.88  |
| -5 | -3 | -8 | 94.23  | 2.74  |
| -5 | -3 | -8 | 95.55  | 2.61  |
| -5 | -3 | -7 | 3.35   | 0.96  |
| -5 | -3 | -7 | 1.93   | 1.18  |
| -5 | -3 | -7 | 2.15   | 0.67  |
| -5 | -3 | -7 | 2.85   | 0.92  |
| -5 | -3 | -7 | 3.46   | 0.95  |
| -5 | -3 | -6 | 362.61 | 6.96  |
| -5 | -3 | -6 | 353.38 | 6.86  |
| -5 | -3 | -6 | 335.44 | 6.27  |
| -5 | -3 | -6 | 354.25 | 6.95  |
| -5 | -3 | -5 | 6.60   | 1.38  |
| -5 | -3 | -5 | 6.72   | 1.34  |
| -5 | -3 | -5 | 6.41   | 1.20  |
| -5 | -3 | -5 | 6.18   | 1.59  |
| -5 | -3 | -4 | 648.53 | 10.59 |
| -5 | -3 | -4 | 658.42 | 10.24 |
| -5 | -3 | -3 | 10.96  | 1.45  |
| -5 | -3 | -3 | 9.78   | 1.41  |
| -5 | -3 | -3 | 11.02  | 1.50  |
| -5 | -3 | -3 | 13.69  | 1.83  |
| -5 | -3 | -2 | 50.24  | 2.69  |
| -5 | -3 | -2 | 48.23  | 2.50  |
| -5 | -3 | -2 | 50.75  | 2.63  |
| -5 | -3 | -2 | 51.13  | 2.62  |
| -5 | -3 | -1 | 283.29 | 6.14  |
| -5 | -3 | -1 | 270.12 | 5.89  |

## CIF 31

|    |    |    |         |       |
|----|----|----|---------|-------|
| -5 | -3 | -1 | 263.25  | 6.81  |
| -5 | -3 | -1 | 276.36  | 6.05  |
| -5 | -3 | -1 | 280.69  | 6.08  |
| -5 | -3 | -1 | 255.14  | 6.71  |
| -5 | -3 | 0  | 30.88   | 1.95  |
| -5 | -3 | 0  | 34.85   | 2.45  |
| -5 | -3 | 0  | 27.47   | 1.84  |
| -5 | -3 | 0  | 32.49   | 2.29  |
| -5 | -3 | 0  | 25.88   | 1.78  |
| -5 | -3 | 0  | 34.29   | 2.68  |
| -5 | -3 | 0  | 26.89   | 1.69  |
| -5 | -3 | 0  | 34.79   | 2.74  |
| -5 | -3 | 0  | 34.08   | 2.45  |
| -5 | -3 | 1  | 1122.62 | 16.23 |
| -5 | -3 | 1  | 1077.71 | 13.37 |
| -5 | -3 | 1  | 1123.14 | 15.15 |
| -5 | -3 | 1  | 1134.58 | 15.01 |
| -5 | -3 | 1  | 1012.03 | 13.02 |
| -5 | -3 | 1  | 1028.67 | 13.36 |
| -5 | -3 | 1  | 1212.60 | 15.77 |
| -5 | -3 | 1  | 1203.27 | 15.77 |
| -5 | -3 | 1  | 1105.63 | 13.49 |
| -5 | -3 | 2  | 1100.35 | 14.47 |
| -5 | -3 | 2  | 1071.43 | 14.71 |
| -5 | -3 | 2  | 1078.81 | 13.59 |
| -5 | -3 | 2  | 1050.52 | 12.84 |
| -5 | -3 | 2  | 1039.90 | 12.87 |
| -5 | -3 | 2  | 1076.16 | 14.61 |
| -5 | -3 | 2  | 1044.26 | 15.52 |
| -5 | -3 | 3  | 966.37  | 11.92 |
| -5 | -3 | 3  | 1019.83 | 13.85 |
| -5 | -3 | 3  | 1048.17 | 14.72 |
| -5 | -3 | 3  | 1028.91 | 14.14 |
| -5 | -3 | 3  | 1070.11 | 12.90 |
| -5 | -3 | 3  | 992.10  | 11.60 |
| -5 | -3 | 3  | 1006.60 | 13.19 |
| -5 | -3 | 3  | 1069.98 | 15.21 |
| -5 | -3 | 3  | 993.78  | 13.87 |
| -5 | -3 | 3  | 1051.96 | 14.38 |
| -5 | -3 | 3  | 987.76  | 12.08 |
| -5 | -3 | 4  | 110.46  | 3.96  |

## CIF 31

|    |    |   |        |       |
|----|----|---|--------|-------|
| -5 | -3 | 4 | 115.20 | 3.19  |
| -5 | -3 | 4 | 105.26 | 3.60  |
| -5 | -3 | 4 | 109.66 | 3.93  |
| -5 | -3 | 4 | 119.20 | 4.18  |
| -5 | -3 | 4 | 108.67 | 3.22  |
| -5 | -3 | 5 | 589.19 | 10.82 |
| -5 | -3 | 5 | 616.81 | 9.23  |
| -5 | -3 | 5 | 646.52 | 11.07 |
| -5 | -3 | 5 | 713.56 | 11.10 |
| -5 | -3 | 5 | 688.39 | 10.46 |
| -5 | -3 | 5 | 739.14 | 12.06 |
| -5 | -3 | 5 | 673.87 | 10.91 |
| -5 | -3 | 5 | 714.01 | 10.62 |
| -5 | -3 | 5 | 698.46 | 9.83  |
| -5 | -3 | 5 | 716.14 | 11.34 |
| -5 | -3 | 5 | 707.82 | 9.80  |
| -5 | -3 | 6 | 335.37 | 6.40  |
| -5 | -3 | 6 | 315.97 | 7.32  |
| -5 | -3 | 6 | 327.94 | 6.87  |
| -5 | -3 | 6 | 320.65 | 6.92  |
| -5 | -3 | 6 | 333.41 | 6.97  |
| -5 | -3 | 6 | 346.71 | 7.99  |
| -5 | -3 | 6 | 328.99 | 6.18  |
| -5 | -3 | 6 | 334.37 | 7.31  |
| -5 | -3 | 6 | 323.42 | 6.70  |
| -5 | -3 | 6 | 328.67 | 7.40  |
| -5 | -3 | 6 | 327.95 | 7.47  |
| -5 | -3 | 6 | 339.89 | 7.50  |
| -5 | -3 | 6 | 348.80 | 6.63  |
| -5 | -3 | 6 | 342.76 | 7.35  |
| -5 | -3 | 7 | 134.50 | 3.87  |
| -5 | -3 | 7 | 135.05 | 3.79  |
| -5 | -3 | 7 | 149.14 | 4.29  |
| -5 | -3 | 7 | 139.63 | 4.48  |
| -5 | -3 | 7 | 138.82 | 4.47  |
| -5 | -3 | 7 | 155.32 | 4.53  |
| -5 | -3 | 7 | 119.50 | 4.58  |
| -5 | -3 | 7 | 147.05 | 4.35  |
| -5 | -3 | 7 | 137.59 | 3.74  |
| -5 | -3 | 7 | 141.78 | 4.81  |
| -5 | -3 | 7 | 134.24 | 4.61  |

## CIF 31

|    |    |    |        |       |
|----|----|----|--------|-------|
| -5 | -3 | 7  | 145.10 | 4.76  |
| -5 | -3 | 7  | 125.43 | 4.44  |
| -5 | -3 | 7  | 121.63 | 4.61  |
| -5 | -3 | 7  | 135.99 | 4.72  |
| -5 | -3 | 8  | 108.47 | 3.99  |
| -5 | -3 | 8  | 103.86 | 3.93  |
| -5 | -3 | 8  | 104.52 | 4.09  |
| -5 | -3 | 8  | 88.05  | 3.63  |
| -5 | -3 | 8  | 106.33 | 4.07  |
| -5 | -3 | 8  | 106.63 | 4.21  |
| -5 | -3 | 8  | 105.76 | 3.52  |
| -5 | -3 | 8  | 109.42 | 4.02  |
| -5 | -3 | 8  | 113.01 | 3.96  |
| -5 | -3 | 8  | 88.43  | 3.20  |
| -5 | -3 | 8  | 107.59 | 3.18  |
| -5 | -3 | 8  | 96.19  | 4.15  |
| -5 | -3 | 8  | 100.09 | 4.13  |
| -5 | -3 | 8  | 106.64 | 4.20  |
| -5 | -3 | 8  | 112.29 | 3.93  |
| -5 | -3 | 9  | 666.30 | 11.42 |
| -5 | -3 | 9  | 693.84 | 11.13 |
| -5 | -3 | 9  | 681.69 | 9.79  |
| -5 | -3 | 9  | 691.24 | 11.22 |
| -5 | -3 | 9  | 699.65 | 11.53 |
| -5 | -3 | 9  | 625.56 | 11.45 |
| -5 | -3 | 9  | 712.60 | 10.50 |
| -5 | -3 | 9  | 710.17 | 11.93 |
| -5 | -3 | 9  | 685.60 | 11.50 |
| -5 | -3 | 9  | 642.88 | 10.97 |
| -5 | -3 | 9  | 686.93 | 11.28 |
| -5 | -3 | 10 | 790.56 | 12.68 |
| -5 | -3 | 10 | 777.84 | 12.90 |
| -5 | -3 | 10 | 836.26 | 12.44 |
| -5 | -3 | 10 | 861.28 | 13.08 |
| -5 | -3 | 10 | 849.31 | 12.71 |
| -5 | -3 | 10 | 847.75 | 13.65 |
| -5 | -3 | 10 | 833.64 | 12.69 |
| -5 | -3 | 10 | 846.14 | 11.46 |
| -5 | -3 | 10 | 746.06 | 13.14 |
| -5 | -3 | 10 | 762.22 | 12.59 |
| -5 | -3 | 10 | 738.04 | 12.56 |



## CIF 31

|    |    |    |        |       |
|----|----|----|--------|-------|
| -5 | -3 | 10 | 765.31 | 11.61 |
| -5 | -3 | 11 | 548.89 | 9.82  |
| -5 | -3 | 11 | 508.33 | 9.54  |
| -5 | -3 | 11 | 474.07 | 9.18  |
| -5 | -3 | 11 | 506.33 | 10.03 |
| -5 | -3 | 11 | 535.45 | 10.42 |
| -5 | -3 | 11 | 480.45 | 9.46  |
| -5 | -3 | 11 | 498.13 | 8.86  |
| -5 | -3 | 11 | 482.86 | 8.39  |
| -5 | -3 | 11 | 486.95 | 9.51  |
| -5 | -3 | 11 | 503.30 | 9.81  |
| -5 | -3 | 11 | 511.00 | 10.16 |
| -5 | -3 | 11 | 481.94 | 8.97  |
| -5 | -3 | 11 | 505.73 | 9.82  |
| -5 | -3 | 12 | 292.07 | 6.94  |
| -5 | -3 | 12 | 283.59 | 6.55  |
| -5 | -3 | 12 | 289.34 | 6.98  |
| -5 | -3 | 12 | 305.27 | 6.92  |
| -5 | -3 | 12 | 288.98 | 6.95  |
| -5 | -3 | 12 | 245.26 | 5.91  |
| -5 | -3 | 12 | 288.24 | 7.22  |
| -5 | -3 | 12 | 261.36 | 7.04  |
| -5 | -3 | 12 | 252.15 | 6.79  |
| -5 | -3 | 12 | 253.21 | 6.34  |
| -5 | -3 | 12 | 261.29 | 5.95  |
| -5 | -3 | 12 | 279.06 | 5.98  |
| -5 | -3 | 13 | 437.42 | 7.72  |
| -5 | -3 | 13 | 474.66 | 8.37  |
| -5 | -3 | 13 | 462.25 | 8.45  |
| -5 | -3 | 13 | 459.91 | 8.72  |
| -5 | -3 | 13 | 461.50 | 8.92  |
| -5 | -3 | 13 | 460.52 | 8.62  |
| -5 | -3 | 13 | 432.12 | 8.35  |
| -5 | -3 | 13 | 404.82 | 8.45  |
| -5 | -3 | 13 | 422.27 | 7.46  |
| -5 | -3 | 13 | 460.71 | 8.37  |
| -5 | -3 | 13 | 427.67 | 7.71  |
| -5 | -3 | 13 | 462.34 | 8.66  |
| -5 | -3 | 13 | 452.77 | 8.79  |
| -5 | -3 | 14 | 117.45 | 3.61  |
| -5 | -3 | 14 | 111.68 | 3.74  |

## CIF 31

|    |    |    |        |       |
|----|----|----|--------|-------|
| -5 | -3 | 14 | 118.37 | 3.82  |
| -5 | -3 | 14 | 113.90 | 3.67  |
| -5 | -3 | 14 | 104.08 | 3.70  |
| -5 | -3 | 14 | 105.56 | 3.22  |
| -5 | -3 | 14 | 118.24 | 3.84  |
| -5 | -3 | 14 | 112.20 | 3.69  |
| -5 | -3 | 15 | 29.47  | 1.68  |
| -5 | -3 | 15 | 33.16  | 1.74  |
| -5 | -3 | 15 | 30.66  | 1.71  |
| -5 | -3 | 15 | 31.73  | 1.68  |
| -5 | -3 | 15 | 30.18  | 1.72  |
| -5 | -3 | 15 | 27.76  | 1.35  |
| -5 | -2 | -9 | 48.60  | 1.80  |
| -5 | -2 | -9 | 42.18  | 1.66  |
| -5 | -2 | -9 | 42.23  | 2.36  |
| -5 | -2 | -8 | 118.07 | 3.35  |
| -5 | -2 | -8 | 124.36 | 3.43  |
| -5 | -2 | -7 | 73.36  | 3.03  |
| -5 | -2 | -7 | 77.21  | 3.03  |
| -5 | -2 | -7 | 70.71  | 2.95  |
| -5 | -2 | -7 | 70.28  | 2.66  |
| -5 | -2 | -7 | 81.15  | 3.97  |
| -5 | -2 | -7 | 70.30  | 7.87  |
| -5 | -2 | -7 | 76.75  | 4.39  |
| -5 | -2 | -6 | 8.12   | 1.56  |
| -5 | -2 | -6 | 9.85   | 1.46  |
| -5 | -2 | -6 | 9.49   | 1.91  |
| -5 | -2 | -6 | 6.46   | 7.83  |
| -5 | -2 | -6 | 9.57   | 1.45  |
| -5 | -2 | -6 | 10.28  | 1.44  |
| -5 | -2 | -6 | 7.61   | 1.22  |
| -5 | -2 | -5 | 374.71 | 12.46 |
| -5 | -2 | -5 | 371.65 | 7.70  |
| -5 | -2 | -5 | 367.65 | 6.90  |
| -5 | -2 | -5 | 381.86 | 8.11  |
| -5 | -2 | -5 | 372.73 | 9.08  |
| -5 | -2 | -5 | 372.23 | 7.46  |
| -5 | -2 | -5 | 371.07 | 7.62  |
| -5 | -2 | -5 | 355.94 | 8.58  |
| -5 | -2 | -5 | 370.86 | 7.22  |
| -5 | -2 | -4 | 142.72 | 4.57  |

## CIF 31

|    |    |    |        |      |
|----|----|----|--------|------|
| -5 | -2 | -4 | 150.84 | 4.65 |
| -5 | -2 | -4 | 153.76 | 4.22 |
| -5 | -2 | -4 | 160.68 | 5.61 |
| -5 | -2 | -4 | 150.50 | 5.26 |
| -5 | -2 | -4 | 153.84 | 4.57 |
| -5 | -2 | -4 | 148.00 | 5.67 |
| -5 | -2 | -4 | 151.09 | 4.44 |
| -5 | -2 | -3 | 175.97 | 4.79 |
| -5 | -2 | -3 | 178.29 | 4.45 |
| -5 | -2 | -3 | 188.27 | 5.27 |
| -5 | -2 | -3 | 181.94 | 4.89 |
| -5 | -2 | -2 | 6.98   | 1.41 |
| -5 | -2 | -2 | 7.50   | 1.23 |
| -5 | -2 | -2 | 4.18   | 1.01 |
| -5 | -2 | -2 | 4.33   | 1.06 |
| -5 | -2 | -2 | 5.41   | 1.12 |
| -5 | -2 | -2 | 6.61   | 4.79 |
| -5 | -2 | -2 | 5.37   | 0.90 |
| -5 | -2 | -1 | 27.79  | 2.14 |
| -5 | -2 | -1 | 31.44  | 1.93 |
| -5 | -2 | -1 | 30.64  | 2.37 |
| -5 | -2 | -1 | 29.63  | 3.70 |
| -5 | -2 | -1 | 33.18  | 2.23 |
| -5 | -2 | -1 | 27.93  | 1.85 |
| -5 | -2 | -1 | 28.50  | 2.07 |
| -5 | -2 | -1 | 30.05  | 2.48 |
| -5 | -2 | -1 | 28.11  | 1.81 |
| -5 | -2 | 0  | 64.22  | 3.26 |
| -5 | -2 | 0  | 66.35  | 2.99 |
| -5 | -2 | 0  | 64.47  | 2.57 |
| -5 | -2 | 0  | 65.22  | 2.59 |
| -5 | -2 | 0  | 68.04  | 2.63 |
| -5 | -2 | 0  | 64.48  | 2.96 |
| -5 | -2 | 0  | 64.20  | 2.78 |
| -5 | -2 | 0  | 62.68  | 2.98 |
| -5 | -2 | 0  | 66.47  | 3.43 |
| -5 | -2 | 0  | 64.49  | 2.61 |
| -5 | -2 | 1  | 26.27  | 1.79 |
| -5 | -2 | 1  | 29.03  | 2.27 |
| -5 | -2 | 1  | 27.17  | 2.16 |
| -5 | -2 | 1  | 19.64  | 1.23 |

## CIF 31

|    |    |   |        |       |
|----|----|---|--------|-------|
| -5 | -2 | 1 | 16.66  | 1.34  |
| -5 | -2 | 1 | 18.45  | 1.40  |
| -5 | -2 | 1 | 22.08  | 1.50  |
| -5 | -2 | 1 | 18.05  | 1.34  |
| -5 | -2 | 1 | 24.46  | 1.87  |
| -5 | -2 | 1 | 19.41  | 1.80  |
| -5 | -2 | 1 | 19.99  | 1.64  |
| -5 | -2 | 1 | 24.79  | 1.81  |
| -5 | -2 | 1 | 20.87  | 1.44  |
| -5 | -2 | 2 | 16.51  | 1.21  |
| -5 | -2 | 2 | 17.17  | 1.63  |
| -5 | -2 | 2 | 15.70  | 1.25  |
| -5 | -2 | 2 | 16.72  | 1.64  |
| -5 | -2 | 2 | 18.85  | 1.63  |
| -5 | -2 | 2 | 14.93  | 1.22  |
| -5 | -2 | 2 | 13.49  | 1.63  |
| -5 | -2 | 2 | 16.14  | 1.43  |
| -5 | -2 | 2 | 17.22  | 1.50  |
| -5 | -2 | 2 | 16.33  | 1.19  |
| -5 | -2 | 2 | 16.41  | 1.14  |
| -5 | -2 | 2 | 15.25  | 1.43  |
| -5 | -2 | 2 | 14.90  | 1.46  |
| -5 | -2 | 2 | 15.04  | 1.17  |
| -5 | -2 | 3 | 732.45 | 11.59 |
| -5 | -2 | 3 | 722.86 | 9.42  |
| -5 | -2 | 3 | 694.33 | 10.37 |
| -5 | -2 | 3 | 695.13 | 9.18  |
| -5 | -2 | 3 | 701.90 | 10.17 |
| -5 | -2 | 3 | 740.47 | 11.42 |
| -5 | -2 | 3 | 657.97 | 9.34  |
| -5 | -2 | 3 | 681.69 | 10.93 |
| -5 | -2 | 3 | 810.76 | 11.10 |
| -5 | -2 | 3 | 738.71 | 11.40 |
| -5 | -2 | 3 | 750.06 | 11.13 |
| -5 | -2 | 3 | 660.98 | 10.12 |
| -5 | -2 | 4 | 794.44 | 11.44 |
| -5 | -2 | 4 | 797.21 | 10.37 |
| -5 | -2 | 4 | 789.98 | 10.75 |
| -5 | -2 | 4 | 737.80 | 11.90 |
| -5 | -2 | 4 | 783.18 | 11.83 |
| -5 | -2 | 4 | 854.58 | 12.16 |

## CIF 31

|    |    |   |        |       |
|----|----|---|--------|-------|
| -5 | -2 | 4 | 778.05 | 11.24 |
| -5 | -2 | 4 | 769.65 | 12.10 |
| -5 | -2 | 4 | 809.25 | 10.39 |
| -5 | -2 | 4 | 807.81 | 11.32 |
| -5 | -2 | 4 | 863.95 | 11.81 |
| -5 | -2 | 4 | 846.96 | 11.27 |
| -5 | -2 | 4 | 795.59 | 10.36 |
| -5 | -2 | 5 | 422.55 | 7.85  |
| -5 | -2 | 5 | 436.73 | 7.30  |
| -5 | -2 | 5 | 395.65 | 7.84  |
| -5 | -2 | 5 | 455.26 | 8.59  |
| -5 | -2 | 5 | 453.00 | 7.30  |
| -5 | -2 | 5 | 412.80 | 7.44  |
| -5 | -2 | 5 | 430.99 | 7.13  |
| -5 | -2 | 5 | 402.24 | 7.78  |
| -5 | -2 | 5 | 490.01 | 8.64  |
| -5 | -2 | 5 | 437.03 | 6.11  |
| -5 | -2 | 5 | 451.97 | 7.55  |
| -5 | -2 | 5 | 433.78 | 7.01  |
| -5 | -2 | 5 | 433.36 | 7.80  |
| -5 | -2 | 5 | 433.09 | 8.03  |
| -5 | -2 | 5 | 451.93 | 8.24  |
| -5 | -2 | 6 | 202.82 | 5.39  |
| -5 | -2 | 6 | 197.40 | 4.97  |
| -5 | -2 | 6 | 210.41 | 5.09  |
| -5 | -2 | 6 | 183.92 | 4.60  |
| -5 | -2 | 6 | 207.89 | 4.87  |
| -5 | -2 | 6 | 179.52 | 5.00  |
| -5 | -2 | 6 | 180.68 | 5.11  |
| -5 | -2 | 6 | 176.99 | 4.90  |
| -5 | -2 | 6 | 215.11 | 5.66  |
| -5 | -2 | 6 | 170.60 | 4.92  |
| -5 | -2 | 6 | 201.83 | 4.03  |
| -5 | -2 | 6 | 200.48 | 5.33  |
| -5 | -2 | 6 | 216.83 | 5.57  |
| -5 | -2 | 6 | 179.68 | 5.16  |
| -5 | -2 | 6 | 183.16 | 4.73  |
| -5 | -2 | 6 | 212.66 | 4.87  |
| -5 | -2 | 7 | 251.73 | 6.28  |
| -5 | -2 | 7 | 254.02 | 5.71  |
| -5 | -2 | 7 | 249.40 | 6.16  |

## CIF 31

|    |    |   |        |      |
|----|----|---|--------|------|
| -5 | -2 | 7 | 248.27 | 4.94 |
| -5 | -2 | 7 | 249.18 | 6.24 |
| -5 | -2 | 7 | 246.63 | 6.16 |
| -5 | -2 | 7 | 265.56 | 6.43 |
| -5 | -2 | 7 | 244.00 | 5.83 |
| -5 | -2 | 7 | 236.82 | 4.90 |
| -5 | -2 | 7 | 261.90 | 6.31 |
| -5 | -2 | 7 | 247.13 | 6.11 |
| -5 | -2 | 7 | 223.93 | 5.95 |
| -5 | -2 | 7 | 251.10 | 5.71 |
| -5 | -2 | 7 | 251.60 | 5.76 |
| -5 | -2 | 7 | 254.98 | 5.88 |
| -5 | -2 | 7 | 258.54 | 5.88 |
| -5 | -2 | 7 | 258.09 | 6.07 |
| -5 | -2 | 8 | 152.86 | 4.91 |
| -5 | -2 | 8 | 156.47 | 4.66 |
| -5 | -2 | 8 | 136.02 | 4.78 |
| -5 | -2 | 8 | 150.75 | 4.58 |
| -5 | -2 | 8 | 140.14 | 4.36 |
| -5 | -2 | 8 | 131.28 | 4.69 |
| -5 | -2 | 8 | 147.99 | 4.87 |
| -5 | -2 | 8 | 161.60 | 4.68 |
| -5 | -2 | 8 | 149.04 | 4.68 |
| -5 | -2 | 8 | 148.05 | 3.95 |
| -5 | -2 | 8 | 136.00 | 4.52 |
| -5 | -2 | 8 | 136.53 | 3.87 |
| -5 | -2 | 8 | 131.25 | 4.64 |
| -5 | -2 | 8 | 154.04 | 4.94 |
| -5 | -2 | 8 | 146.26 | 4.78 |
| -5 | -2 | 8 | 136.02 | 4.71 |
| -5 | -2 | 8 | 144.30 | 4.44 |
| -5 | -2 | 9 | 33.85  | 2.39 |
| -5 | -2 | 9 | 32.76  | 2.47 |
| -5 | -2 | 9 | 36.48  | 2.59 |
| -5 | -2 | 9 | 34.95  | 2.28 |
| -5 | -2 | 9 | 35.45  | 2.36 |
| -5 | -2 | 9 | 35.46  | 2.07 |
| -5 | -2 | 9 | 32.53  | 2.58 |
| -5 | -2 | 9 | 34.68  | 2.31 |
| -5 | -2 | 9 | 33.05  | 2.40 |
| -5 | -2 | 9 | 32.92  | 2.06 |

## CIF 31

|    |    |    |        |      |
|----|----|----|--------|------|
| -5 | -2 | 9  | 35.62  | 2.61 |
| -5 | -2 | 9  | 35.98  | 2.65 |
| -5 | -2 | 9  | 34.62  | 2.50 |
| -5 | -2 | 9  | 35.03  | 2.23 |
| -5 | -2 | 9  | 35.10  | 2.54 |
| -5 | -2 | 10 | 6.60   | 1.60 |
| -5 | -2 | 10 | 5.57   | 1.29 |
| -5 | -2 | 10 | 7.16   | 1.42 |
| -5 | -2 | 10 | 12.07  | 1.68 |
| -5 | -2 | 10 | 6.22   | 1.45 |
| -5 | -2 | 10 | 5.14   | 1.03 |
| -5 | -2 | 10 | 7.35   | 1.22 |
| -5 | -2 | 10 | 7.33   | 1.54 |
| -5 | -2 | 10 | 5.92   | 1.45 |
| -5 | -2 | 10 | 6.00   | 1.23 |
| -5 | -2 | 10 | 8.37   | 1.52 |
| -5 | -2 | 11 | 2.82   | 1.38 |
| -5 | -2 | 11 | 2.47   | 1.28 |
| -5 | -2 | 11 | 3.15   | 1.19 |
| -5 | -2 | 11 | 1.89   | 1.10 |
| -5 | -2 | 11 | 1.81   | 1.02 |
| -5 | -2 | 11 | 2.90   | 1.19 |
| -5 | -2 | 11 | 3.46   | 1.36 |
| -5 | -2 | 11 | 2.99   | 0.94 |
| -5 | -2 | 11 | 2.09   | 1.36 |
| -5 | -2 | 11 | 2.67   | 1.02 |
| -5 | -2 | 11 | 3.23   | 1.19 |
| -5 | -2 | 11 | 2.34   | 0.92 |
| -5 | -2 | 11 | 2.22   | 1.00 |
| -5 | -2 | 12 | 3.87   | 1.44 |
| -5 | -2 | 12 | 4.54   | 1.50 |
| -5 | -2 | 12 | 3.31   | 1.37 |
| -5 | -2 | 12 | 3.99   | 0.97 |
| -5 | -2 | 12 | 3.28   | 0.98 |
| -5 | -2 | 12 | 3.42   | 1.03 |
| -5 | -2 | 12 | 4.65   | 1.32 |
| -5 | -2 | 12 | 3.00   | 1.32 |
| -5 | -2 | 12 | 4.97   | 1.37 |
| -5 | -2 | 12 | 3.97   | 1.14 |
| -5 | -2 | 13 | 591.52 | 9.98 |
| -5 | -2 | 13 | 471.65 | 8.94 |

## CIF 31

|    |    |     |        |       |
|----|----|-----|--------|-------|
| -5 | -2 | 13  | 548.62 | 9.99  |
| -5 | -2 | 13  | 546.50 | 10.07 |
| -5 | -2 | 13  | 541.43 | 10.11 |
| -5 | -2 | 13  | 555.76 | 9.49  |
| -5 | -2 | 13  | 559.83 | 9.75  |
| -5 | -2 | 13  | 556.06 | 9.62  |
| -5 | -2 | 13  | 554.22 | 9.19  |
| -5 | -2 | 13  | 506.05 | 8.86  |
| -5 | -2 | 13  | 593.69 | 9.74  |
| -5 | -2 | 13  | 546.87 | 10.16 |
| -5 | -2 | 14  | 13.04  | 1.49  |
| -5 | -2 | 14  | 10.75  | 1.48  |
| -5 | -2 | 14  | 13.18  | 1.32  |
| -5 | -2 | 14  | 13.22  | 1.44  |
| -5 | -2 | 14  | 12.93  | 1.55  |
| -5 | -2 | 14  | 12.66  | 1.46  |
| -5 | -2 | 14  | 10.22  | 1.19  |
| -5 | -2 | 14  | 13.14  | 1.48  |
| -5 | -2 | 14  | 11.74  | 1.22  |
| -5 | -2 | 15  | 5.19   | 0.89  |
| -5 | -2 | 15  | 4.91   | 0.98  |
| -5 | -2 | 15  | 5.61   | 1.00  |
| -5 | -2 | 15  | 4.13   | 0.82  |
| -5 | -2 | 15  | 6.19   | 1.00  |
| -5 | -2 | 15  | 6.36   | 1.04  |
| -5 | -1 | -10 | 17.35  | 0.95  |
| -5 | -1 | -9  | 122.05 | 3.24  |
| -5 | -1 | -9  | 121.09 | 4.42  |
| -5 | -1 | -9  | 124.67 | 3.47  |
| -5 | -1 | -9  | 120.49 | 3.30  |
| -5 | -1 | -9  | 122.50 | 7.31  |
| -5 | -1 | -8  | 0.49   | 0.91  |
| -5 | -1 | -8  | 3.29   | 3.36  |
| -5 | -1 | -8  | 0.53   | 3.80  |
| -5 | -1 | -8  | 1.74   | 0.86  |
| -5 | -1 | -8  | 3.25   | 5.75  |
| -5 | -1 | -8  | 1.42   | 8.44  |
| -5 | -1 | -8  | 1.13   | 0.86  |
| -5 | -1 | -8  | 1.89   | 0.75  |
| -5 | -1 | -8  | 1.04   | 0.84  |
| -5 | -1 | -8  | 1.73   | 1.42  |



## CIF 31

|    |    |    |        |       |
|----|----|----|--------|-------|
| -5 | -1 | -7 | 60.91  | 2.94  |
| -5 | -1 | -7 | 65.75  | 3.03  |
| -5 | -1 | -7 | 56.67  | 2.76  |
| -5 | -1 | -7 | 48.26  | 3.46  |
| -5 | -1 | -7 | 44.02  | 9.53  |
| -5 | -1 | -7 | 60.86  | 5.49  |
| -5 | -1 | -7 | 59.13  | 2.67  |
| -5 | -1 | -7 | 63.51  | 3.91  |
| -5 | -1 | -7 | 69.36  | 3.06  |
| -5 | -1 | -7 | 60.09  | 2.83  |
| -5 | -1 | -6 | 772.81 | 11.82 |
| -5 | -1 | -6 | 793.31 | 11.91 |
| -5 | -1 | -6 | 709.17 | 13.38 |
| -5 | -1 | -6 | 785.11 | 11.57 |
| -5 | -1 | -6 | 787.11 | 11.62 |
| -5 | -1 | -6 | 751.90 | 11.12 |
| -5 | -1 | -6 | 786.62 | 12.15 |
| -5 | -1 | -6 | 715.83 | 10.55 |
| -5 | -1 | -6 | 771.90 | 11.40 |
| -5 | -1 | -6 | 786.24 | 11.64 |
| -5 | -1 | -5 | 236.85 | 5.91  |
| -5 | -1 | -5 | 248.56 | 6.05  |
| -5 | -1 | -5 | 243.18 | 5.79  |
| -5 | -1 | -5 | 236.90 | 5.89  |
| -5 | -1 | -5 | 211.83 | 6.75  |
| -5 | -1 | -5 | 211.29 | 5.65  |
| -5 | -1 | -5 | 237.28 | 5.65  |
| -5 | -1 | -5 | 245.55 | 5.74  |
| -5 | -1 | -5 | 247.87 | 5.87  |
| -5 | -1 | -4 | 316.86 | 8.05  |
| -5 | -1 | -4 | 309.36 | 6.40  |
| -5 | -1 | -4 | 329.18 | 6.65  |
| -5 | -1 | -4 | 304.69 | 6.03  |
| -5 | -1 | -4 | 327.01 | 6.65  |
| -5 | -1 | -4 | 302.91 | 6.38  |
| -5 | -1 | -4 | 298.89 | 6.32  |
| -5 | -1 | -4 | 310.26 | 6.71  |
| -5 | -1 | -4 | 316.81 | 6.54  |
| -5 | -1 | -3 | 142.43 | 4.29  |
| -5 | -1 | -3 | 171.57 | 4.53  |
| -5 | -1 | -3 | 166.93 | 4.27  |

## CIF 31

|    |    |    |        |      |
|----|----|----|--------|------|
| -5 | -1 | -3 | 168.75 | 4.05 |
| -5 | -1 | -3 | 173.47 | 4.56 |
| -5 | -1 | -3 | 161.93 | 4.14 |
| -5 | -1 | -3 | 152.57 | 7.35 |
| -5 | -1 | -3 | 156.37 | 4.20 |
| -5 | -1 | -3 | 149.81 | 5.25 |
| -5 | -1 | -3 | 168.85 | 4.46 |
| -5 | -1 | -3 | 151.72 | 4.37 |
| -5 | -1 | -2 | 41.12  | 5.37 |
| -5 | -1 | -2 | 47.72  | 2.29 |
| -5 | -1 | -2 | 41.86  | 2.63 |
| -5 | -1 | -2 | 35.63  | 2.55 |
| -5 | -1 | -2 | 44.10  | 2.11 |
| -5 | -1 | -2 | 43.72  | 2.30 |
| -5 | -1 | -2 | 47.37  | 2.28 |
| -5 | -1 | -2 | 44.58  | 2.27 |
| -5 | -1 | -2 | 45.19  | 2.13 |
| -5 | -1 | -2 | 45.10  | 2.23 |
| -5 | -1 | -1 | 345.98 | 6.22 |
| -5 | -1 | -1 | 337.80 | 6.25 |
| -5 | -1 | -1 | 334.05 | 6.70 |
| -5 | -1 | -1 | 329.03 | 7.44 |
| -5 | -1 | -1 | 345.08 | 7.19 |
| -5 | -1 | -1 | 335.99 | 7.90 |
| -5 | -1 | -1 | 335.98 | 7.15 |
| -5 | -1 | -1 | 343.34 | 6.24 |
| -5 | -1 | -1 | 335.20 | 6.49 |
| -5 | -1 | -1 | 339.07 | 6.58 |
| -5 | -1 | 0  | 1.95   | 0.73 |
| -5 | -1 | 0  | 0.23   | 0.58 |
| -5 | -1 | 0  | 1.05   | 0.99 |
| -5 | -1 | 0  | 2.19   | 0.66 |
| -5 | -1 | 0  | -0.27  | 2.21 |
| -5 | -1 | 0  | 0.48   | 0.70 |
| -5 | -1 | 0  | 1.94   | 0.83 |
| -5 | -1 | 0  | 0.44   | 0.57 |
| -5 | -1 | 0  | 0.51   | 0.62 |
| -5 | -1 | 0  | 0.53   | 0.86 |
| -5 | -1 | 0  | 0.29   | 0.56 |
| -5 | -1 | 0  | 1.44   | 0.70 |
| -5 | -1 | 0  | 0.20   | 0.55 |

## CIF 31

|    |    |   |         |       |
|----|----|---|---------|-------|
| -5 | -1 | 1 | 654.65  | 8.75  |
| -5 | -1 | 1 | 665.95  | 8.93  |
| -5 | -1 | 1 | 642.99  | 9.26  |
| -5 | -1 | 1 | 646.21  | 9.28  |
| -5 | -1 | 1 | 660.27  | 10.15 |
| -5 | -1 | 1 | 644.15  | 9.83  |
| -5 | -1 | 1 | 666.74  | 10.81 |
| -5 | -1 | 1 | 646.00  | 10.13 |
| -5 | -1 | 2 | 142.19  | 4.27  |
| -5 | -1 | 2 | 140.13  | 4.20  |
| -5 | -1 | 2 | 139.86  | 3.79  |
| -5 | -1 | 2 | 134.43  | 3.62  |
| -5 | -1 | 2 | 142.38  | 3.75  |
| -5 | -1 | 2 | 143.70  | 3.46  |
| -5 | -1 | 2 | 134.86  | 4.30  |
| -5 | -1 | 2 | 145.85  | 3.40  |
| -5 | -1 | 2 | 143.65  | 4.12  |
| -5 | -1 | 2 | 140.00  | 3.68  |
| -5 | -1 | 3 | 143.97  | 5.07  |
| -5 | -1 | 3 | 149.51  | 3.86  |
| -5 | -1 | 3 | 155.76  | 4.64  |
| -5 | -1 | 3 | 149.53  | 3.96  |
| -5 | -1 | 3 | 146.93  | 4.47  |
| -5 | -1 | 3 | 154.58  | 3.62  |
| -5 | -1 | 3 | 148.17  | 4.22  |
| -5 | -1 | 3 | 143.46  | 2.91  |
| -5 | -1 | 3 | 143.65  | 3.77  |
| -5 | -1 | 3 | 165.12  | 4.15  |
| -5 | -1 | 3 | 147.50  | 4.37  |
| -5 | -1 | 3 | 161.70  | 3.97  |
| -5 | -1 | 3 | 159.15  | 3.73  |
| -5 | -1 | 4 | 1055.37 | 13.09 |
| -5 | -1 | 4 | 1022.05 | 12.64 |
| -5 | -1 | 4 | 1042.49 | 11.19 |
| -5 | -1 | 4 | 1008.48 | 13.22 |
| -5 | -1 | 4 | 1054.14 | 14.00 |
| -5 | -1 | 4 | 1015.47 | 12.71 |
| -5 | -1 | 4 | 1002.49 | 11.62 |
| -5 | -1 | 4 | 1026.16 | 12.95 |
| -5 | -1 | 4 | 1033.25 | 12.32 |
| -5 | -1 | 4 | 1023.46 | 12.26 |

## CIF 31

|    |    |   |         |       |
|----|----|---|---------|-------|
| -5 | -1 | 4 | 1034.76 | 13.44 |
| -5 | -1 | 4 | 1041.58 | 13.67 |
| -5 | -1 | 4 | 987.49  | 11.96 |
| -5 | -1 | 4 | 1044.19 | 13.64 |
| -5 | -1 | 4 | 1050.60 | 12.29 |
| -5 | -1 | 5 | 472.50  | 7.90  |
| -5 | -1 | 5 | 451.07  | 6.89  |
| -5 | -1 | 5 | 458.54  | 7.34  |
| -5 | -1 | 5 | 478.58  | 8.40  |
| -5 | -1 | 5 | 462.23  | 7.66  |
| -5 | -1 | 5 | 438.78  | 7.07  |
| -5 | -1 | 5 | 459.84  | 8.41  |
| -5 | -1 | 5 | 475.68  | 7.81  |
| -5 | -1 | 5 | 466.84  | 8.22  |
| -5 | -1 | 5 | 458.32  | 7.52  |
| -5 | -1 | 5 | 463.98  | 8.08  |
| -5 | -1 | 5 | 422.34  | 7.83  |
| -5 | -1 | 5 | 434.66  | 9.20  |
| -5 | -1 | 5 | 448.88  | 6.48  |
| -5 | -1 | 5 | 449.59  | 7.58  |
| -5 | -1 | 5 | 449.24  | 7.80  |
| -5 | -1 | 5 | 435.43  | 7.21  |
| -5 | -1 | 5 | 457.48  | 7.30  |
| -5 | -1 | 6 | 3244.42 | 33.83 |
| -5 | -1 | 6 | 3383.63 | 33.34 |
| -5 | -1 | 6 | 3580.43 | 34.11 |
| -5 | -1 | 6 | 3620.40 | 34.63 |
| -5 | -1 | 6 | 3399.83 | 32.82 |
| -5 | -1 | 6 | 3616.78 | 34.38 |
| -5 | -1 | 6 | 3355.24 | 32.54 |
| -5 | -1 | 6 | 3075.15 | 35.57 |
| -5 | -1 | 6 | 3499.39 | 33.57 |
| -5 | -1 | 6 | 3012.57 | 33.06 |
| -5 | -1 | 6 | 3536.14 | 33.14 |
| -5 | -1 | 6 | 3232.56 | 32.08 |
| -5 | -1 | 6 | 3333.09 | 32.79 |
| -5 | -1 | 6 | 3492.89 | 31.69 |
| -5 | -1 | 6 | 3440.29 | 33.73 |
| -5 | -1 | 6 | 3399.15 | 33.87 |
| -5 | -1 | 6 | 3435.18 | 33.80 |
| -5 | -1 | 6 | 3576.57 | 33.65 |

## CIF 31

|    |    |   |         |       |
|----|----|---|---------|-------|
| -5 | -1 | 6 | 3360.29 | 33.53 |
| -5 | -1 | 6 | 3523.54 | 33.04 |
| -5 | -1 | 7 | 2.07    | 0.71  |
| -5 | -1 | 7 | 1.58    | 0.89  |
| -5 | -1 | 7 | 2.28    | 0.96  |
| -5 | -1 | 7 | 2.53    | 0.94  |
| -5 | -1 | 7 | 4.09    | 1.09  |
| -5 | -1 | 7 | 3.60    | 0.93  |
| -5 | -1 | 7 | 3.26    | 1.32  |
| -5 | -1 | 7 | 2.58    | 1.02  |
| -5 | -1 | 7 | 2.21    | 0.78  |
| -5 | -1 | 7 | 6.66    | 1.37  |
| -5 | -1 | 7 | 2.56    | 1.06  |
| -5 | -1 | 7 | 3.82    | 0.94  |
| -5 | -1 | 7 | 7.06    | 1.13  |
| -5 | -1 | 7 | 4.54    | 1.14  |
| -5 | -1 | 7 | 7.44    | 1.21  |
| -5 | -1 | 7 | 3.52    | 1.10  |
| -5 | -1 | 7 | 3.92    | 0.96  |
| -5 | -1 | 7 | 2.68    | 1.06  |
| -5 | -1 | 7 | 2.03    | 0.96  |
| -5 | -1 | 7 | 2.44    | 0.85  |
| -5 | -1 | 7 | 1.18    | 0.77  |
| -5 | -1 | 8 | 2311.77 | 25.62 |
| -5 | -1 | 8 | 2358.25 | 24.80 |
| -5 | -1 | 8 | 2294.20 | 24.85 |
| -5 | -1 | 8 | 2196.42 | 25.29 |
| -5 | -1 | 8 | 2222.07 | 25.64 |
| -5 | -1 | 8 | 2283.64 | 25.32 |
| -5 | -1 | 8 | 2383.65 | 26.08 |
| -5 | -1 | 8 | 2455.68 | 25.19 |
| -5 | -1 | 8 | 2276.27 | 23.76 |
| -5 | -1 | 8 | 2259.44 | 25.84 |
| -5 | -1 | 8 | 2221.06 | 25.43 |
| -5 | -1 | 8 | 2303.19 | 25.43 |
| -5 | -1 | 8 | 2068.02 | 23.69 |
| -5 | -1 | 8 | 2344.28 | 25.37 |
| -5 | -1 | 9 | 54.37   | 3.18  |
| -5 | -1 | 9 | 51.23   | 3.01  |
| -5 | -1 | 9 | 49.82   | 2.93  |
| -5 | -1 | 9 | 57.27   | 3.12  |

## CIF 31

|    |    |    |         |       |
|----|----|----|---------|-------|
| -5 | -1 | 9  | 56.81   | 3.09  |
| -5 | -1 | 9  | 44.86   | 2.65  |
| -5 | -1 | 9  | 50.59   | 3.05  |
| -5 | -1 | 9  | 61.09   | 2.76  |
| -5 | -1 | 9  | 52.76   | 2.55  |
| -5 | -1 | 9  | 51.95   | 2.90  |
| -5 | -1 | 10 | 1065.60 | 14.84 |
| -5 | -1 | 10 | 1007.45 | 14.26 |
| -5 | -1 | 10 | 1035.11 | 14.78 |
| -5 | -1 | 10 | 1013.37 | 15.31 |
| -5 | -1 | 10 | 986.61  | 15.15 |
| -5 | -1 | 10 | 998.71  | 13.36 |
| -5 | -1 | 10 | 1036.28 | 15.48 |
| -5 | -1 | 10 | 1071.02 | 14.32 |
| -5 | -1 | 10 | 1058.26 | 15.74 |
| -5 | -1 | 10 | 1117.01 | 15.66 |
| -5 | -1 | 11 | 6.19    | 1.46  |
| -5 | -1 | 11 | 6.88    | 1.32  |
| -5 | -1 | 11 | 9.67    | 1.70  |
| -5 | -1 | 11 | 7.67    | 1.45  |
| -5 | -1 | 11 | 6.26    | 1.19  |
| -5 | -1 | 11 | 9.23    | 1.36  |
| -5 | -1 | 11 | 6.27    | 1.68  |
| -5 | -1 | 11 | 8.89    | 1.53  |
| -5 | -1 | 11 | 10.46   | 1.73  |
| -5 | -1 | 12 | 29.50   | 2.35  |
| -5 | -1 | 12 | 25.00   | 2.18  |
| -5 | -1 | 12 | 27.47   | 2.28  |
| -5 | -1 | 12 | 31.14   | 2.32  |
| -5 | -1 | 12 | 29.71   | 2.21  |
| -5 | -1 | 12 | 25.01   | 2.46  |
| -5 | -1 | 12 | 28.20   | 2.51  |
| -5 | -1 | 12 | 26.37   | 1.95  |
| -5 | -1 | 12 | 31.65   | 2.21  |
| -5 | -1 | 13 | 35.33   | 2.21  |
| -5 | -1 | 13 | 37.19   | 2.32  |
| -5 | -1 | 13 | 45.39   | 2.88  |
| -5 | -1 | 13 | 39.60   | 2.68  |
| -5 | -1 | 13 | 42.61   | 2.61  |
| -5 | -1 | 13 | 36.88   | 2.39  |
| -5 | -1 | 13 | 35.59   | 2.55  |

## CIF 31

|    |    |     |        |      |
|----|----|-----|--------|------|
| -5 | -1 | 13  | 33.34  | 2.24 |
| -5 | -1 | 13  | 35.69  | 2.42 |
| -5 | -1 | 13  | 39.37  | 2.73 |
| -5 | -1 | 13  | 36.37  | 2.48 |
| -5 | -1 | 14  | 2.38   | 0.96 |
| -5 | -1 | 14  | 2.40   | 0.94 |
| -5 | -1 | 14  | 2.29   | 0.80 |
| -5 | -1 | 14  | 3.12   | 1.09 |
| -5 | -1 | 14  | 2.48   | 0.95 |
| -5 | -1 | 14  | 1.84   | 0.79 |
| -5 | -1 | 14  | 1.34   | 0.96 |
| -5 | -1 | 14  | 2.80   | 1.16 |
| -5 | -1 | 15  | 5.56   | 0.75 |
| -5 | -1 | 15  | 6.51   | 1.08 |
| -5 | -1 | 15  | 7.39   | 1.03 |
| -5 | -1 | 15  | 7.30   | 1.00 |
| -5 | -1 | 15  | 7.94   | 1.08 |
| -5 | -1 | 15  | 8.04   | 1.01 |
| -5 | 0  | -11 | 141.58 | 3.81 |
| -5 | 0  | -10 | 72.74  | 2.44 |
| -5 | 0  | -10 | 54.15  | 6.30 |
| -5 | 0  | -10 | 67.90  | 3.42 |
| -5 | 0  | -10 | 51.49  | 2.85 |
| -5 | 0  | -10 | 65.55  | 2.20 |
| -5 | 0  | -9  | 14.62  | 4.81 |
| -5 | 0  | -9  | 21.96  | 7.75 |
| -5 | 0  | -9  | 13.92  | 1.26 |
| -5 | 0  | -9  | 13.55  | 2.46 |
| -5 | 0  | -9  | 11.65  | 4.91 |
| -5 | 0  | -9  | 14.80  | 1.43 |
| -5 | 0  | -9  | 15.59  | 1.47 |
| -5 | 0  | -8  | 2.53   | 0.92 |
| -5 | 0  | -8  | 0.63   | 1.81 |
| -5 | 0  | -8  | 0.11   | 0.92 |
| -5 | 0  | -8  | 0.10   | 0.78 |
| -5 | 0  | -8  | 0.18   | 0.84 |
| -5 | 0  | -8  | 1.07   | 3.41 |
| -5 | 0  | -8  | -1.79  | 6.42 |
| -5 | 0  | -8  | 1.10   | 0.84 |
| -5 | 0  | -8  | -0.42  | 0.97 |
| -5 | 0  | -8  | 1.94   | 1.42 |

## CIF 31

|    |   |    |        |       |
|----|---|----|--------|-------|
| -5 | 0 | -7 | 853.68 | 12.81 |
| -5 | 0 | -7 | 863.97 | 12.83 |
| -5 | 0 | -7 | 872.65 | 12.16 |
| -5 | 0 | -7 | 881.42 | 12.45 |
| -5 | 0 | -7 | 896.24 | 12.35 |
| -5 | 0 | -7 | 932.29 | 15.44 |
| -5 | 0 | -7 | 863.14 | 12.94 |
| -5 | 0 | -7 | 925.37 | 12.78 |
| -5 | 0 | -7 | 825.81 | 12.07 |
| -5 | 0 | -7 | 913.72 | 12.85 |
| -5 | 0 | -6 | 317.58 | 6.98  |
| -5 | 0 | -6 | 330.91 | 6.87  |
| -5 | 0 | -6 | 305.54 | 6.85  |
| -5 | 0 | -6 | 341.79 | 8.81  |
| -5 | 0 | -6 | 318.88 | 6.68  |
| -5 | 0 | -6 | 310.70 | 6.73  |
| -5 | 0 | -6 | 311.94 | 6.58  |
| -5 | 0 | -6 | 302.83 | 6.70  |
| -5 | 0 | -6 | 302.29 | 6.86  |
| -5 | 0 | -6 | 309.14 | 6.63  |
| -5 | 0 | -5 | 43.22  | 2.14  |
| -5 | 0 | -5 | 44.34  | 2.53  |
| -5 | 0 | -5 | 42.05  | 3.18  |
| -5 | 0 | -5 | 49.68  | 2.57  |
| -5 | 0 | -5 | 47.83  | 2.60  |
| -5 | 0 | -5 | 47.02  | 2.42  |
| -5 | 0 | -5 | 46.07  | 2.50  |
| -5 | 0 | -5 | 45.97  | 2.40  |
| -5 | 0 | -5 | 44.28  | 2.42  |
| -5 | 0 | -5 | 43.88  | 2.47  |
| -5 | 0 | -5 | 41.37  | 3.56  |
| -5 | 0 | -5 | 47.38  | 2.48  |
| -5 | 0 | -4 | 68.89  | 2.99  |
| -5 | 0 | -4 | 68.80  | 2.92  |
| -5 | 0 | -4 | 74.71  | 2.95  |
| -5 | 0 | -4 | 66.72  | 2.78  |
| -5 | 0 | -4 | 69.00  | 2.89  |
| -5 | 0 | -4 | 64.70  | 2.78  |
| -5 | 0 | -4 | 68.00  | 2.76  |
| -5 | 0 | -4 | 69.17  | 2.65  |
| -5 | 0 | -4 | 72.52  | 2.92  |



## CIF 31

|    |   |    |         |       |
|----|---|----|---------|-------|
| -5 | 0 | -4 | 72.74   | 3.93  |
| -5 | 0 | -4 | 63.40   | 3.54  |
| -5 | 0 | -3 | 5.95    | 1.39  |
| -5 | 0 | -3 | 2.81    | 0.74  |
| -5 | 0 | -3 | 2.20    | 0.72  |
| -5 | 0 | -3 | 1.89    | 0.78  |
| -5 | 0 | -3 | 2.69    | 0.84  |
| -5 | 0 | -3 | 6.14    | 1.03  |
| -5 | 0 | -3 | 2.76    | 0.89  |
| -5 | 0 | -3 | 2.62    | 0.78  |
| -5 | 0 | -3 | 2.39    | 0.80  |
| -5 | 0 | -3 | 3.91    | 2.00  |
| -5 | 0 | -3 | 1.72    | 0.82  |
| -5 | 0 | -3 | 2.05    | 0.85  |
| -5 | 0 | -2 | 11.45   | 1.16  |
| -5 | 0 | -2 | 10.65   | 1.19  |
| -5 | 0 | -2 | 8.18    | 1.29  |
| -5 | 0 | -2 | 10.27   | 1.27  |
| -5 | 0 | -2 | 10.66   | 1.23  |
| -5 | 0 | -2 | 9.63    | 1.12  |
| -5 | 0 | -2 | 10.52   | 1.50  |
| -5 | 0 | -2 | 11.11   | 2.48  |
| -5 | 0 | -2 | 13.53   | 1.21  |
| -5 | 0 | -2 | 10.68   | 1.08  |
| -5 | 0 | -1 | 11.64   | 1.09  |
| -5 | 0 | -1 | 15.75   | 1.27  |
| -5 | 0 | -1 | 13.80   | 1.18  |
| -5 | 0 | -1 | 13.55   | 1.18  |
| -5 | 0 | -1 | 11.35   | 2.96  |
| -5 | 0 | -1 | 13.45   | 1.45  |
| -5 | 0 | -1 | 12.74   | 1.34  |
| -5 | 0 | -1 | 13.09   | 1.22  |
| -5 | 0 | -1 | 11.74   | 1.28  |
| -5 | 0 | -1 | 13.28   | 1.14  |
| -5 | 0 | 0  | 210.68  | 5.24  |
| -5 | 0 | 0  | 212.21  | 4.96  |
| -5 | 0 | 0  | 220.55  | 5.27  |
| -5 | 0 | 0  | 207.38  | 5.36  |
| -5 | 0 | 0  | 202.21  | 5.27  |
| -5 | 0 | 1  | 2030.53 | 21.98 |
| -5 | 0 | 1  | 1934.55 | 21.24 |

## CIF 31

|    |   |   |         |       |
|----|---|---|---------|-------|
| -5 | 0 | 1 | 1974.97 | 19.72 |
| -5 | 0 | 1 | 1879.45 | 22.48 |
| -5 | 0 | 1 | 1950.12 | 20.90 |
| -5 | 0 | 1 | 2067.49 | 21.97 |
| -5 | 0 | 1 | 1981.62 | 18.51 |
| -5 | 0 | 1 | 1974.85 | 19.58 |
| -5 | 0 | 1 | 1951.96 | 20.65 |
| -5 | 0 | 1 | 1840.90 | 21.78 |
| -5 | 0 | 1 | 1962.83 | 19.50 |
| -5 | 0 | 2 | 198.33  | 5.01  |
| -5 | 0 | 2 | 212.78  | 4.30  |
| -5 | 0 | 2 | 209.25  | 4.34  |
| -5 | 0 | 2 | 223.41  | 4.33  |
| -5 | 0 | 2 | 214.36  | 4.31  |
| -5 | 0 | 2 | 219.30  | 5.12  |
| -5 | 0 | 2 | 214.70  | 3.72  |
| -5 | 0 | 2 | 210.57  | 5.70  |
| -5 | 0 | 2 | 220.38  | 4.78  |
| -5 | 0 | 2 | 215.11  | 4.42  |
| -5 | 0 | 3 | 75.57   | 2.50  |
| -5 | 0 | 3 | 69.18   | 3.29  |
| -5 | 0 | 3 | 69.79   | 2.94  |
| -5 | 0 | 3 | 71.54   | 2.46  |
| -5 | 0 | 3 | 64.23   | 2.78  |
| -5 | 0 | 3 | 79.81   | 2.54  |
| -5 | 0 | 3 | 69.37   | 2.52  |
| -5 | 0 | 3 | 73.20   | 2.91  |
| -5 | 0 | 3 | 73.85   | 2.76  |
| -5 | 0 | 3 | 71.20   | 2.85  |
| -5 | 0 | 3 | 84.90   | 2.28  |
| -5 | 0 | 3 | 69.76   | 2.73  |
| -5 | 0 | 4 | 6.75    | 0.93  |
| -5 | 0 | 4 | 6.41    | 0.93  |
| -5 | 0 | 4 | 8.27    | 1.21  |
| -5 | 0 | 4 | 6.00    | 1.01  |
| -5 | 0 | 4 | 5.97    | 0.87  |
| -5 | 0 | 4 | 4.71    | 1.25  |
| -5 | 0 | 4 | 6.74    | 1.19  |
| -5 | 0 | 4 | 5.19    | 0.90  |
| -5 | 0 | 4 | 6.24    | 1.11  |
| -5 | 0 | 4 | 7.13    | 1.10  |

## CIF 31

|    |   |   |        |      |
|----|---|---|--------|------|
| -5 | 0 | 4 | 5.04   | 0.72 |
| -5 | 0 | 4 | 6.77   | 1.07 |
| -5 | 0 | 4 | 6.47   | 1.02 |
| -5 | 0 | 4 | 5.44   | 0.89 |
| -5 | 0 | 4 | 5.55   | 0.94 |
| -5 | 0 | 4 | 7.09   | 1.13 |
| -5 | 0 | 4 | 8.81   | 1.08 |
| -5 | 0 | 5 | 472.18 | 7.42 |
| -5 | 0 | 5 | 461.79 | 7.96 |
| -5 | 0 | 5 | 432.63 | 7.70 |
| -5 | 0 | 5 | 434.07 | 7.67 |
| -5 | 0 | 5 | 462.74 | 7.66 |
| -5 | 0 | 5 | 497.09 | 8.22 |
| -5 | 0 | 5 | 447.48 | 7.53 |
| -5 | 0 | 5 | 434.40 | 7.05 |
| -5 | 0 | 5 | 442.93 | 7.72 |
| -5 | 0 | 5 | 447.24 | 6.56 |
| -5 | 0 | 5 | 432.57 | 6.87 |
| -5 | 0 | 5 | 440.54 | 7.95 |
| -5 | 0 | 5 | 464.72 | 7.29 |
| -5 | 0 | 5 | 454.59 | 7.24 |
| -5 | 0 | 5 | 433.49 | 7.15 |
| -5 | 0 | 5 | 486.24 | 9.31 |
| -5 | 0 | 5 | 460.62 | 6.71 |
| -5 | 0 | 5 | 484.98 | 8.06 |
| -5 | 0 | 5 | 454.11 | 7.92 |
| -5 | 0 | 5 | 466.12 | 7.84 |
| -5 | 0 | 5 | 470.11 | 7.51 |
| -5 | 0 | 6 | 316.04 | 6.48 |
| -5 | 0 | 6 | 269.58 | 6.17 |
| -5 | 0 | 6 | 270.10 | 4.14 |
| -5 | 0 | 6 | 293.74 | 6.26 |
| -5 | 0 | 6 | 317.59 | 7.44 |
| -5 | 0 | 6 | 316.21 | 6.10 |
| -5 | 0 | 6 | 326.01 | 6.47 |
| -5 | 0 | 6 | 309.37 | 6.49 |
| -5 | 0 | 6 | 287.26 | 5.96 |
| -5 | 0 | 6 | 307.31 | 5.92 |
| -5 | 0 | 6 | 289.58 | 6.05 |
| -5 | 0 | 6 | 305.94 | 6.42 |
| -5 | 0 | 6 | 300.55 | 6.20 |

## CIF 31

|    |   |   |         |       |
|----|---|---|---------|-------|
| -5 | 0 | 6 | 287.70  | 5.38  |
| -5 | 0 | 6 | 334.26  | 6.40  |
| -5 | 0 | 6 | 284.44  | 5.56  |
| -5 | 0 | 7 | 143.99  | 4.48  |
| -5 | 0 | 7 | 150.67  | 4.48  |
| -5 | 0 | 7 | 140.52  | 4.97  |
| -5 | 0 | 7 | 149.31  | 4.13  |
| -5 | 0 | 7 | 165.17  | 4.65  |
| -5 | 0 | 7 | 150.54  | 4.53  |
| -5 | 0 | 7 | 171.35  | 4.71  |
| -5 | 0 | 7 | 143.18  | 4.23  |
| -5 | 0 | 7 | 139.68  | 3.81  |
| -5 | 0 | 7 | 133.17  | 2.96  |
| -5 | 0 | 7 | 139.83  | 3.80  |
| -5 | 0 | 7 | 133.82  | 3.94  |
| -5 | 0 | 7 | 136.48  | 4.20  |
| -5 | 0 | 8 | 1251.87 | 16.30 |
| -5 | 0 | 8 | 1066.60 | 15.72 |
| -5 | 0 | 8 | 1118.73 | 15.75 |
| -5 | 0 | 8 | 1042.21 | 16.39 |
| -5 | 0 | 8 | 1197.68 | 15.20 |
| -5 | 0 | 8 | 1315.69 | 15.13 |
| -5 | 0 | 8 | 1240.45 | 15.94 |
| -5 | 0 | 8 | 1274.17 | 15.80 |
| -5 | 0 | 8 | 1237.17 | 15.29 |
| -5 | 0 | 8 | 1161.59 | 15.33 |
| -5 | 0 | 8 | 1268.32 | 16.28 |
| -5 | 0 | 8 | 1127.26 | 12.91 |
| -5 | 0 | 8 | 1135.05 | 15.27 |
| -5 | 0 | 8 | 1157.94 | 15.77 |
| -5 | 0 | 8 | 1179.71 | 14.17 |
| -5 | 0 | 8 | 1242.77 | 16.10 |
| -5 | 0 | 9 | 1.16    | 1.02  |
| -5 | 0 | 9 | 1.90    | 1.11  |
| -5 | 0 | 9 | 0.89    | 0.83  |
| -5 | 0 | 9 | 0.39    | 1.01  |
| -5 | 0 | 9 | 1.06    | 1.09  |
| -5 | 0 | 9 | 3.87    | 1.05  |
| -5 | 0 | 9 | 1.91    | 0.82  |
| -5 | 0 | 9 | 1.19    | 0.68  |
| -5 | 0 | 9 | 0.57    | 0.98  |

## CIF 31

|    |   |    |        |       |
|----|---|----|--------|-------|
| -5 | 0 | 9  | 0.78   | 1.11  |
| -5 | 0 | 9  | 1.56   | 1.12  |
| -5 | 0 | 9  | 0.73   | 0.55  |
| -5 | 0 | 9  | 1.25   | 0.87  |
| -5 | 0 | 9  | 0.63   | 0.86  |
| -5 | 0 | 10 | 99.56  | 4.32  |
| -5 | 0 | 10 | 114.49 | 4.57  |
| -5 | 0 | 10 | 102.95 | 3.98  |
| -5 | 0 | 10 | 115.63 | 4.65  |
| -5 | 0 | 10 | 108.16 | 4.28  |
| -5 | 0 | 10 | 119.03 | 4.15  |
| -5 | 0 | 10 | 113.73 | 4.55  |
| -5 | 0 | 10 | 124.87 | 4.83  |
| -5 | 0 | 10 | 111.09 | 4.58  |
| -5 | 0 | 10 | 108.71 | 3.33  |
| -5 | 0 | 10 | 121.15 | 4.18  |
| -5 | 0 | 11 | 75.72  | 3.41  |
| -5 | 0 | 11 | 59.68  | 3.41  |
| -5 | 0 | 11 | 68.55  | 3.23  |
| -5 | 0 | 11 | 62.72  | 3.05  |
| -5 | 0 | 11 | 66.21  | 3.32  |
| -5 | 0 | 11 | 60.71  | 3.49  |
| -5 | 0 | 11 | 65.95  | 3.60  |
| -5 | 0 | 11 | 64.93  | 2.65  |
| -5 | 0 | 11 | 64.39  | 3.62  |
| -5 | 0 | 11 | 60.72  | 3.43  |
| -5 | 0 | 12 | 652.90 | 11.00 |
| -5 | 0 | 12 | 712.66 | 12.39 |
| -5 | 0 | 12 | 662.77 | 11.71 |
| -5 | 0 | 12 | 584.56 | 9.41  |
| -5 | 0 | 12 | 769.50 | 11.74 |
| -5 | 0 | 12 | 717.86 | 11.39 |
| -5 | 0 | 12 | 707.01 | 11.02 |
| -5 | 0 | 12 | 719.66 | 12.24 |
| -5 | 0 | 12 | 690.54 | 12.33 |
| -5 | 0 | 12 | 672.77 | 11.92 |
| -5 | 0 | 13 | 2.22   | 0.89  |
| -5 | 0 | 13 | 2.01   | 0.83  |
| -5 | 0 | 13 | 3.69   | 1.19  |
| -5 | 0 | 13 | 2.78   | 0.88  |
| -5 | 0 | 13 | 1.43   | 1.18  |

## CIF 31

|    |   |     |        |      |
|----|---|-----|--------|------|
| -5 | 0 | 13  | 2.10   | 0.81 |
| -5 | 0 | 13  | 2.61   | 1.15 |
| -5 | 0 | 13  | 2.75   | 1.20 |
| -5 | 0 | 13  | 3.03   | 1.23 |
| -5 | 0 | 13  | 3.59   | 1.13 |
| -5 | 0 | 14  | 17.86  | 1.75 |
| -5 | 0 | 14  | 21.33  | 1.76 |
| -5 | 0 | 14  | 17.81  | 1.74 |
| -5 | 0 | 14  | 19.15  | 1.67 |
| -5 | 0 | 14  | 17.95  | 1.90 |
| -5 | 0 | 14  | 17.62  | 1.78 |
| -5 | 0 | 14  | 17.87  | 1.59 |
| -5 | 0 | 15  | 46.58  | 2.12 |
| -5 | 0 | 15  | 44.72  | 2.03 |
| -5 | 0 | 15  | 46.41  | 2.17 |
| -5 | 0 | 15  | 43.10  | 1.88 |
| -5 | 0 | 15  | 46.40  | 2.20 |
| -5 | 0 | 15  | 45.92  | 2.03 |
| -5 | 0 | 15  | 41.48  | 2.11 |
| -5 | 1 | -11 | 108.67 | 3.30 |
| -5 | 1 | -11 | 81.11  | 3.42 |
| -5 | 1 | -11 | 82.36  | 5.54 |
| -5 | 1 | -11 | 105.59 | 2.58 |
| -5 | 1 | -10 | 23.25  | 1.54 |
| -5 | 1 | -10 | 24.99  | 1.60 |
| -5 | 1 | -10 | 24.46  | 2.11 |
| -5 | 1 | -10 | 22.91  | 4.30 |
| -5 | 1 | -10 | 21.08  | 2.12 |
| -5 | 1 | -9  | 412.80 | 8.11 |
| -5 | 1 | -9  | 373.21 | 6.50 |
| -5 | 1 | -9  | 396.07 | 7.51 |
| -5 | 1 | -9  | 386.45 | 7.17 |
| -5 | 1 | -9  | 409.05 | 6.62 |
| -5 | 1 | -9  | 397.94 | 7.34 |
| -5 | 1 | -9  | 406.07 | 7.27 |
| -5 | 1 | -9  | 392.31 | 8.16 |
| -5 | 1 | -8  | 54.88  | 2.97 |
| -5 | 1 | -8  | 56.00  | 2.53 |
| -5 | 1 | -8  | 52.05  | 2.76 |
| -5 | 1 | -8  | 57.29  | 2.75 |
| -5 | 1 | -8  | 54.31  | 2.58 |

## CIF 31

|    |   |    |         |       |
|----|---|----|---------|-------|
| -5 | 1 | -8 | 54.16   | 2.97  |
| -5 | 1 | -8 | 55.24   | 3.78  |
| -5 | 1 | -8 | 55.16   | 2.82  |
| -5 | 1 | -8 | 53.82   | 2.84  |
| -5 | 1 | -7 | 192.78  | 5.50  |
| -5 | 1 | -7 | 202.17  | 5.13  |
| -5 | 1 | -7 | 200.29  | 5.59  |
| -5 | 1 | -7 | 199.61  | 5.36  |
| -5 | 1 | -7 | 196.11  | 5.13  |
| -5 | 1 | -7 | 195.85  | 5.38  |
| -5 | 1 | -7 | 203.25  | 4.96  |
| -5 | 1 | -7 | 191.19  | 5.34  |
| -5 | 1 | -7 | 186.92  | 4.93  |
| -5 | 1 | -6 | 8.01    | 1.33  |
| -5 | 1 | -6 | 7.21    | 1.20  |
| -5 | 1 | -6 | 7.85    | 1.35  |
| -5 | 1 | -6 | 10.55   | 1.33  |
| -5 | 1 | -6 | 6.56    | 1.38  |
| -5 | 1 | -6 | 5.32    | 1.56  |
| -5 | 1 | -6 | 6.79    | 1.18  |
| -5 | 1 | -6 | 5.84    | 1.34  |
| -5 | 1 | -6 | 6.23    | 1.34  |
| -5 | 1 | -5 | 1910.88 | 21.22 |
| -5 | 1 | -5 | 1831.43 | 20.71 |
| -5 | 1 | -5 | 1820.99 | 21.12 |
| -5 | 1 | -5 | 1773.94 | 20.59 |
| -5 | 1 | -5 | 1940.75 | 24.14 |
| -5 | 1 | -5 | 1846.15 | 20.08 |
| -5 | 1 | -5 | 1931.38 | 20.51 |
| -5 | 1 | -5 | 1731.22 | 20.43 |
| -5 | 1 | -5 | 1857.41 | 20.26 |
| -5 | 1 | -5 | 1900.14 | 20.63 |
| -5 | 1 | -5 | 1912.36 | 21.33 |
| -5 | 1 | -5 | 1975.66 | 23.41 |
| -5 | 1 | -4 | 871.81  | 11.81 |
| -5 | 1 | -4 | 950.41  | 12.01 |
| -5 | 1 | -4 | 821.58  | 10.96 |
| -5 | 1 | -4 | 831.90  | 11.11 |
| -5 | 1 | -4 | 888.21  | 14.03 |
| -5 | 1 | -4 | 815.93  | 11.69 |
| -5 | 1 | -4 | 826.41  | 11.50 |

## CIF 31

|    |   |    |         |       |
|----|---|----|---------|-------|
| -5 | 1 | -4 | 870.37  | 11.37 |
| -5 | 1 | -4 | 816.69  | 11.54 |
| -5 | 1 | -4 | 885.60  | 13.37 |
| -5 | 1 | -4 | 890.73  | 11.44 |
| -5 | 1 | -3 | 1110.66 | 13.62 |
| -5 | 1 | -3 | 1189.99 | 13.43 |
| -5 | 1 | -3 | 1085.66 | 12.59 |
| -5 | 1 | -3 | 1179.89 | 15.19 |
| -5 | 1 | -3 | 1119.05 | 13.53 |
| -5 | 1 | -3 | 1070.14 | 13.34 |
| -5 | 1 | -3 | 1107.16 | 13.12 |
| -5 | 1 | -3 | 1142.53 | 15.79 |
| -5 | 1 | -3 | 1077.01 | 13.35 |
| -5 | 1 | -3 | 1037.05 | 13.29 |
| -5 | 1 | -3 | 1049.66 | 13.03 |
| -5 | 1 | -2 | 123.59  | 3.42  |
| -5 | 1 | -2 | 128.43  | 3.38  |
| -5 | 1 | -2 | 115.62  | 3.67  |
| -5 | 1 | -2 | 125.58  | 3.33  |
| -5 | 1 | -2 | 124.47  | 3.24  |
| -5 | 1 | -2 | 114.52  | 3.55  |
| -5 | 1 | -2 | 114.53  | 3.29  |
| -5 | 1 | -2 | 114.55  | 4.12  |
| -5 | 1 | -2 | 110.96  | 3.74  |
| -5 | 1 | -2 | 128.63  | 3.45  |
| -5 | 1 | -1 | 14.68   | 1.48  |
| -5 | 1 | -1 | 18.82   | 1.64  |
| -5 | 1 | -1 | 13.90   | 1.57  |
| -5 | 1 | -1 | 16.51   | 1.46  |
| -5 | 1 | 0  | 129.62  | 4.06  |
| -5 | 1 | 0  | 127.54  | 3.87  |
| -5 | 1 | 0  | 122.14  | 3.84  |
| -5 | 1 | 0  | 125.11  | 3.82  |
| -5 | 1 | 0  | 128.01  | 3.34  |
| -5 | 1 | 1  | 0.09    | 0.54  |
| -5 | 1 | 1  | 0.22    | 0.68  |
| -5 | 1 | 1  | 0.45    | 0.71  |
| -5 | 1 | 1  | 2.76    | 0.73  |
| -5 | 1 | 1  | 0.85    | 0.80  |
| -5 | 1 | 1  | 0.40    | 0.71  |
| -5 | 1 | 1  | 0.20    | 0.41  |



## CIF 31

|    |   |   |         |       |
|----|---|---|---------|-------|
| -5 | 1 | 1 | 0.41    | 0.59  |
| -5 | 1 | 1 | 1.16    | 0.44  |
| -5 | 1 | 1 | 0.03    | 0.72  |
| -5 | 1 | 2 | 2711.05 | 25.84 |
| -5 | 1 | 2 | 2716.13 | 25.01 |
| -5 | 1 | 2 | 2800.30 | 25.85 |
| -5 | 1 | 2 | 2735.65 | 25.38 |
| -5 | 1 | 2 | 2764.18 | 27.63 |
| -5 | 1 | 2 | 2765.53 | 26.28 |
| -5 | 1 | 2 | 2783.23 | 25.15 |
| -5 | 1 | 3 | 0.15    | 0.73  |
| -5 | 1 | 3 | 0.74    | 0.47  |
| -5 | 1 | 3 | 0.39    | 0.91  |
| -5 | 1 | 3 | 0.59    | 0.64  |
| -5 | 1 | 3 | 0.57    | 0.59  |
| -5 | 1 | 3 | 0.10    | 0.74  |
| -5 | 1 | 3 | 0.09    | 0.61  |
| -5 | 1 | 3 | 0.85    | 0.56  |
| -5 | 1 | 3 | 0.31    | 0.64  |
| -5 | 1 | 3 | 0.02    | 0.43  |
| -5 | 1 | 3 | 0.79    | 0.78  |
| -5 | 1 | 3 | 0.37    | 0.76  |
| -5 | 1 | 3 | 2.27    | 0.74  |
| -5 | 1 | 4 | 1723.16 | 19.09 |
| -5 | 1 | 4 | 1819.14 | 19.70 |
| -5 | 1 | 4 | 1821.99 | 19.75 |
| -5 | 1 | 4 | 1759.63 | 19.78 |
| -5 | 1 | 4 | 1857.33 | 19.34 |
| -5 | 1 | 4 | 1824.19 | 18.78 |
| -5 | 1 | 4 | 1793.31 | 18.56 |
| -5 | 1 | 4 | 1740.41 | 19.89 |
| -5 | 1 | 4 | 1634.14 | 19.15 |
| -5 | 1 | 4 | 1801.55 | 18.10 |
| -5 | 1 | 4 | 1703.96 | 20.59 |
| -5 | 1 | 4 | 1832.66 | 18.24 |
| -5 | 1 | 4 | 1769.07 | 16.35 |
| -5 | 1 | 4 | 1807.97 | 19.87 |
| -5 | 1 | 4 | 1787.23 | 19.82 |
| -5 | 1 | 4 | 1738.56 | 18.47 |
| -5 | 1 | 4 | 1883.88 | 18.56 |
| -5 | 1 | 4 | 1951.23 | 19.66 |

## CIF 31

|    |   |   |         |       |
|----|---|---|---------|-------|
| -5 | 1 | 5 | 349.23  | 6.30  |
| -5 | 1 | 5 | 335.54  | 6.62  |
| -5 | 1 | 5 | 315.10  | 6.49  |
| -5 | 1 | 5 | 344.76  | 6.62  |
| -5 | 1 | 5 | 336.34  | 5.90  |
| -5 | 1 | 5 | 337.30  | 5.73  |
| -5 | 1 | 5 | 350.95  | 7.40  |
| -5 | 1 | 5 | 314.57  | 6.26  |
| -5 | 1 | 5 | 356.81  | 6.68  |
| -5 | 1 | 5 | 308.52  | 4.56  |
| -5 | 1 | 5 | 335.84  | 6.07  |
| -5 | 1 | 5 | 314.54  | 6.34  |
| -5 | 1 | 5 | 343.48  | 6.53  |
| -5 | 1 | 5 | 345.60  | 5.80  |
| -5 | 1 | 5 | 328.38  | 6.33  |
| -5 | 1 | 5 | 348.62  | 6.51  |
| -5 | 1 | 5 | 342.54  | 6.51  |
| -5 | 1 | 6 | 514.63  | 8.74  |
| -5 | 1 | 6 | 527.28  | 8.09  |
| -5 | 1 | 6 | 538.73  | 7.88  |
| -5 | 1 | 6 | 465.13  | 7.83  |
| -5 | 1 | 6 | 515.82  | 8.12  |
| -5 | 1 | 6 | 499.78  | 9.47  |
| -5 | 1 | 6 | 522.78  | 8.80  |
| -5 | 1 | 6 | 491.36  | 7.33  |
| -5 | 1 | 6 | 510.94  | 8.61  |
| -5 | 1 | 6 | 477.84  | 8.15  |
| -5 | 1 | 6 | 508.72  | 8.54  |
| -5 | 1 | 6 | 499.08  | 8.69  |
| -5 | 1 | 6 | 502.04  | 8.35  |
| -5 | 1 | 6 | 570.02  | 9.06  |
| -5 | 1 | 6 | 522.60  | 8.86  |
| -5 | 1 | 6 | 492.25  | 6.54  |
| -5 | 1 | 6 | 508.84  | 8.26  |
| -5 | 1 | 6 | 483.05  | 8.21  |
| -5 | 1 | 7 | 1441.17 | 18.57 |
| -5 | 1 | 7 | 1333.95 | 17.20 |
| -5 | 1 | 7 | 1471.51 | 17.35 |
| -5 | 1 | 7 | 1395.80 | 16.26 |
| -5 | 1 | 7 | 1329.12 | 14.44 |
| -5 | 1 | 7 | 1402.13 | 17.17 |

## CIF 31

|    |   |    |         |       |
|----|---|----|---------|-------|
| -5 | 1 | 7  | 1282.07 | 16.79 |
| -5 | 1 | 7  | 1405.55 | 17.44 |
| -5 | 1 | 7  | 1320.86 | 15.79 |
| -5 | 1 | 7  | 1378.97 | 16.89 |
| -5 | 1 | 7  | 1541.23 | 17.74 |
| -5 | 1 | 7  | 1200.96 | 15.73 |
| -5 | 1 | 7  | 1435.78 | 17.13 |
| -5 | 1 | 7  | 1402.59 | 17.45 |
| -5 | 1 | 7  | 1340.19 | 15.03 |
| -5 | 1 | 7  | 1421.37 | 16.53 |
| -5 | 1 | 8  | 34.56   | 2.35  |
| -5 | 1 | 8  | 35.96   | 2.61  |
| -5 | 1 | 8  | 33.74   | 2.14  |
| -5 | 1 | 8  | 43.13   | 2.52  |
| -5 | 1 | 8  | 36.12   | 2.42  |
| -5 | 1 | 8  | 35.17   | 2.11  |
| -5 | 1 | 8  | 35.42   | 2.11  |
| -5 | 1 | 8  | 32.62   | 2.01  |
| -5 | 1 | 8  | 34.58   | 2.42  |
| -5 | 1 | 8  | 33.08   | 1.73  |
| -5 | 1 | 8  | 36.50   | 2.44  |
| -5 | 1 | 8  | 35.00   | 2.29  |
| -5 | 1 | 8  | 32.49   | 1.70  |
| -5 | 1 | 9  | 123.02  | 4.64  |
| -5 | 1 | 9  | 128.27  | 4.09  |
| -5 | 1 | 9  | 117.80  | 4.25  |
| -5 | 1 | 9  | 135.45  | 4.27  |
| -5 | 1 | 9  | 127.78  | 3.58  |
| -5 | 1 | 9  | 120.66  | 4.56  |
| -5 | 1 | 9  | 122.88  | 4.25  |
| -5 | 1 | 9  | 121.69  | 4.09  |
| -5 | 1 | 9  | 119.39  | 4.61  |
| -5 | 1 | 9  | 114.05  | 4.43  |
| -5 | 1 | 9  | 110.15  | 4.42  |
| -5 | 1 | 9  | 119.36  | 4.32  |
| -5 | 1 | 10 | 8.55    | 1.08  |
| -5 | 1 | 10 | 8.31    | 1.39  |
| -5 | 1 | 10 | 12.08   | 1.74  |
| -5 | 1 | 10 | 9.58    | 1.29  |
| -5 | 1 | 10 | 8.82    | 1.71  |
| -5 | 1 | 10 | 8.02    | 1.29  |

## CIF 31

|    |   |    |        |      |
|----|---|----|--------|------|
| -5 | 1 | 10 | 8.83   | 1.38 |
| -5 | 1 | 10 | 8.64   | 1.71 |
| -5 | 1 | 10 | 7.23   | 1.24 |
| -5 | 1 | 10 | 9.16   | 1.70 |
| -5 | 1 | 10 | 6.54   | 1.32 |
| -5 | 1 | 10 | 10.24  | 1.46 |
| -5 | 1 | 10 | 6.00   | 1.54 |
| -5 | 1 | 10 | 8.70   | 1.70 |
| -5 | 1 | 11 | 96.45  | 4.39 |
| -5 | 1 | 11 | 114.27 | 4.51 |
| -5 | 1 | 11 | 108.51 | 4.64 |
| -5 | 1 | 11 | 95.43  | 3.80 |
| -5 | 1 | 11 | 117.97 | 4.69 |
| -5 | 1 | 11 | 114.57 | 4.70 |
| -5 | 1 | 11 | 108.48 | 3.83 |
| -5 | 1 | 11 | 98.82  | 3.90 |
| -5 | 1 | 11 | 115.08 | 4.12 |
| -5 | 1 | 11 | 102.04 | 4.51 |
| -5 | 1 | 11 | 105.65 | 3.54 |
| -5 | 1 | 12 | 484.22 | 9.86 |
| -5 | 1 | 12 | 418.56 | 7.78 |
| -5 | 1 | 12 | 475.52 | 9.25 |
| -5 | 1 | 12 | 434.68 | 9.27 |
| -5 | 1 | 12 | 475.53 | 8.58 |
| -5 | 1 | 12 | 459.72 | 9.60 |
| -5 | 1 | 12 | 464.50 | 9.75 |
| -5 | 1 | 12 | 445.17 | 7.89 |
| -5 | 1 | 12 | 409.56 | 9.17 |
| -5 | 1 | 13 | 1.28   | 0.96 |
| -5 | 1 | 13 | 1.70   | 1.22 |
| -5 | 1 | 13 | 1.66   | 1.07 |
| -5 | 1 | 13 | 1.09   | 0.90 |
| -5 | 1 | 13 | 1.74   | 1.26 |
| -5 | 1 | 13 | 0.16   | 0.76 |
| -5 | 1 | 13 | 1.41   | 0.95 |
| -5 | 1 | 14 | 98.42  | 3.64 |
| -5 | 1 | 14 | 94.03  | 3.66 |
| -5 | 1 | 14 | 107.02 | 3.68 |
| -5 | 1 | 14 | 99.40  | 3.72 |
| -5 | 1 | 14 | 93.91  | 3.35 |
| -5 | 1 | 15 | 215.78 | 4.61 |

## CIF 31

|    |   |     |        |      |
|----|---|-----|--------|------|
| -5 | 1 | 15  | 217.10 | 4.63 |
| -5 | 1 | 15  | 221.38 | 4.64 |
| -5 | 1 | 15  | 218.58 | 4.39 |
| -5 | 1 | 15  | 203.70 | 4.20 |
| -5 | 1 | 15  | 205.07 | 4.50 |
| -5 | 1 | 15  | 195.21 | 4.11 |
| -5 | 2 | -12 | 3.99   | 1.45 |
| -5 | 2 | -12 | 6.53   | 3.13 |
| -5 | 2 | -11 | -0.13  | 3.45 |
| -5 | 2 | -11 | 0.58   | 0.58 |
| -5 | 2 | -11 | 2.65   | 2.52 |
| -5 | 2 | -11 | 0.95   | 1.08 |
| -5 | 2 | -10 | 9.40   | 1.15 |
| -5 | 2 | -10 | 8.37   | 1.75 |
| -5 | 2 | -10 | 6.63   | 2.24 |
| -5 | 2 | -10 | 10.45  | 5.06 |
| -5 | 2 | -10 | 7.50   | 1.18 |
| -5 | 2 | -10 | 8.48   | 3.79 |
| -5 | 2 | -9  | 270.64 | 6.54 |
| -5 | 2 | -9  | 219.59 | 6.88 |
| -5 | 2 | -9  | 269.85 | 6.19 |
| -5 | 2 | -9  | 273.05 | 6.22 |
| -5 | 2 | -9  | 269.97 | 5.73 |
| -5 | 2 | -9  | 271.45 | 6.39 |
| -5 | 2 | -9  | 245.03 | 5.35 |
| -5 | 2 | -9  | 214.40 | 6.80 |
| -5 | 2 | -9  | 265.11 | 5.95 |
| -5 | 2 | -8  | 55.55  | 3.06 |
| -5 | 2 | -8  | 50.73  | 3.61 |
| -5 | 2 | -8  | 54.70  | 2.36 |
| -5 | 2 | -8  | 55.05  | 3.05 |
| -5 | 2 | -8  | 55.79  | 2.70 |
| -5 | 2 | -8  | 48.82  | 3.43 |
| -5 | 2 | -8  | 56.04  | 2.65 |
| -5 | 2 | -8  | 52.03  | 2.47 |
| -5 | 2 | -8  | 53.68  | 2.85 |
| -5 | 2 | -8  | 51.07  | 2.89 |
| -5 | 2 | -7  | 114.86 | 4.13 |
| -5 | 2 | -7  | 113.40 | 3.51 |
| -5 | 2 | -7  | 121.45 | 4.39 |
| -5 | 2 | -7  | 119.15 | 4.28 |

## CIF 31

|    |   |    |        |       |
|----|---|----|--------|-------|
| -5 | 2 | -7 | 118.23 | 3.86  |
| -5 | 2 | -7 | 117.78 | 3.92  |
| -5 | 2 | -7 | 117.66 | 4.27  |
| -5 | 2 | -7 | 102.84 | 3.82  |
| -5 | 2 | -6 | 904.70 | 12.85 |
| -5 | 2 | -6 | 902.82 | 11.73 |
| -5 | 2 | -6 | 900.15 | 13.02 |
| -5 | 2 | -6 | 881.06 | 12.40 |
| -5 | 2 | -6 | 841.42 | 12.29 |
| -5 | 2 | -6 | 862.28 | 12.08 |
| -5 | 2 | -6 | 916.28 | 12.13 |
| -5 | 2 | -6 | 891.45 | 13.07 |
| -5 | 2 | -6 | 877.54 | 14.88 |
| -5 | 2 | -5 | 2.15   | 0.75  |
| -5 | 2 | -5 | 1.60   | 0.74  |
| -5 | 2 | -5 | 5.16   | 1.17  |
| -5 | 2 | -5 | 1.50   | 0.97  |
| -5 | 2 | -5 | 1.97   | 0.81  |
| -5 | 2 | -5 | 3.29   | 1.05  |
| -5 | 2 | -5 | 1.52   | 0.85  |
| -5 | 2 | -5 | 2.70   | 0.91  |
| -5 | 2 | -5 | 2.24   | 0.90  |
| -5 | 2 | -5 | 1.58   | 0.86  |
| -5 | 2 | -4 | 2.71   | 0.84  |
| -5 | 2 | -4 | 2.61   | 0.89  |
| -5 | 2 | -4 | 4.58   | 0.93  |
| -5 | 2 | -4 | 2.76   | 0.75  |
| -5 | 2 | -4 | 3.26   | 0.77  |
| -5 | 2 | -4 | 4.55   | 0.99  |
| -5 | 2 | -4 | 2.51   | 0.76  |
| -5 | 2 | -4 | 6.33   | 0.91  |
| -5 | 2 | -4 | 2.93   | 0.87  |
| -5 | 2 | -3 | 1.82   | 0.79  |
| -5 | 2 | -3 | 2.01   | 0.76  |
| -5 | 2 | -3 | 1.87   | 0.78  |
| -5 | 2 | -3 | 2.13   | 0.65  |
| -5 | 2 | -3 | 2.55   | 0.77  |
| -5 | 2 | -3 | 2.11   | 0.59  |
| -5 | 2 | -3 | 4.74   | 0.88  |
| -5 | 2 | -3 | 1.48   | 0.57  |
| -5 | 2 | -3 | 2.44   | 0.68  |

## CIF 31

|    |   |    |         |       |
|----|---|----|---------|-------|
| -5 | 2 | -2 | 362.32  | 6.12  |
| -5 | 2 | -2 | 367.33  | 7.06  |
| -5 | 2 | -2 | 377.92  | 4.85  |
| -5 | 2 | -2 | 367.50  | 6.09  |
| -5 | 2 | -2 | 362.87  | 6.71  |
| -5 | 2 | -2 | 374.69  | 7.70  |
| -5 | 2 | -2 | 367.62  | 6.85  |
| -5 | 2 | -2 | 349.53  | 6.09  |
| -5 | 2 | -2 | 370.20  | 6.16  |
| -5 | 2 | -1 | 2.34    | 0.84  |
| -5 | 2 | -1 | 2.95    | 0.46  |
| -5 | 2 | -1 | 1.56    | 0.94  |
| -5 | 2 | -1 | 2.19    | 0.80  |
| -5 | 2 | -1 | 3.48    | 0.92  |
| -5 | 2 | 0  | 64.59   | 2.13  |
| -5 | 2 | 0  | 61.93   | 2.95  |
| -5 | 2 | 0  | 68.26   | 2.22  |
| -5 | 2 | 0  | 68.88   | 2.71  |
| -5 | 2 | 0  | 57.83   | 2.85  |
| -5 | 2 | 0  | 62.67   | 2.64  |
| -5 | 2 | 0  | 67.04   | 2.78  |
| -5 | 2 | 1  | 553.68  | 8.57  |
| -5 | 2 | 1  | 572.74  | 7.66  |
| -5 | 2 | 1  | 535.07  | 7.46  |
| -5 | 2 | 1  | 502.41  | 5.98  |
| -5 | 2 | 1  | 556.36  | 8.58  |
| -5 | 2 | 1  | 542.60  | 7.39  |
| -5 | 2 | 1  | 521.10  | 7.13  |
| -5 | 2 | 2  | 2081.58 | 20.33 |
| -5 | 2 | 2  | 2212.00 | 20.89 |
| -5 | 2 | 2  | 1947.34 | 21.81 |
| -5 | 2 | 2  | 2049.08 | 21.63 |
| -5 | 2 | 2  | 2081.40 | 20.69 |
| -5 | 2 | 2  | 2120.44 | 19.43 |
| -5 | 2 | 2  | 2039.40 | 18.83 |
| -5 | 2 | 2  | 2072.11 | 21.32 |
| -5 | 2 | 2  | 2167.79 | 22.52 |
| -5 | 2 | 3  | 6179.35 | 53.11 |
| -5 | 2 | 3  | 5435.45 | 50.29 |
| -5 | 2 | 3  | 5663.74 | 51.32 |
| -5 | 2 | 3  | 6059.92 | 52.23 |

## CIF 31

|    |   |   |         |       |
|----|---|---|---------|-------|
| -5 | 2 | 3 | 5697.91 | 51.69 |
| -5 | 2 | 3 | 5787.27 | 51.26 |
| -5 | 2 | 3 | 5715.43 | 49.68 |
| -5 | 2 | 3 | 5581.60 | 48.26 |
| -5 | 2 | 3 | 5291.25 | 49.65 |
| -5 | 2 | 3 | 5887.60 | 50.67 |
| -5 | 2 | 3 | 5949.68 | 49.47 |
| -5 | 2 | 3 | 5709.18 | 51.72 |
| -5 | 2 | 4 | 126.84  | 3.25  |
| -5 | 2 | 4 | 124.21  | 3.31  |
| -5 | 2 | 4 | 106.85  | 3.18  |
| -5 | 2 | 4 | 121.88  | 2.60  |
| -5 | 2 | 4 | 128.69  | 4.18  |
| -5 | 2 | 4 | 117.64  | 3.44  |
| -5 | 2 | 4 | 128.12  | 3.07  |
| -5 | 2 | 4 | 122.49  | 3.72  |
| -5 | 2 | 4 | 126.91  | 3.91  |
| -5 | 2 | 4 | 115.77  | 3.70  |
| -5 | 2 | 4 | 134.47  | 3.44  |
| -5 | 2 | 4 | 131.69  | 3.85  |
| -5 | 2 | 4 | 127.87  | 3.20  |
| -5 | 2 | 4 | 133.06  | 3.80  |
| -5 | 2 | 4 | 122.37  | 3.50  |
| -5 | 2 | 4 | 136.12  | 3.70  |
| -5 | 2 | 4 | 133.05  | 3.86  |
| -5 | 2 | 4 | 129.35  | 3.83  |
| -5 | 2 | 5 | 1047.78 | 13.26 |
| -5 | 2 | 5 | 1042.58 | 12.60 |
| -5 | 2 | 5 | 1097.18 | 14.04 |
| -5 | 2 | 5 | 1038.15 | 13.70 |
| -5 | 2 | 5 | 1082.50 | 12.66 |
| -5 | 2 | 5 | 1025.24 | 13.43 |
| -5 | 2 | 5 | 1045.58 | 13.32 |
| -5 | 2 | 5 | 1015.14 | 13.12 |
| -5 | 2 | 5 | 1089.49 | 12.61 |
| -5 | 2 | 5 | 1035.52 | 12.81 |
| -5 | 2 | 5 | 1004.85 | 13.18 |
| -5 | 2 | 5 | 1013.64 | 13.22 |
| -5 | 2 | 5 | 1162.21 | 14.91 |
| -5 | 2 | 5 | 1044.72 | 11.33 |
| -5 | 2 | 5 | 1090.22 | 12.77 |



## CIF 31

|    |   |   |         |       |
|----|---|---|---------|-------|
| -5 | 2 | 5 | 1005.47 | 13.58 |
| -5 | 2 | 5 | 1030.62 | 13.50 |
| -5 | 2 | 6 | 804.53  | 10.51 |
| -5 | 2 | 6 | 792.10  | 12.16 |
| -5 | 2 | 6 | 711.57  | 10.69 |
| -5 | 2 | 6 | 800.51  | 11.71 |
| -5 | 2 | 6 | 741.00  | 10.72 |
| -5 | 2 | 6 | 774.73  | 10.83 |
| -5 | 2 | 6 | 821.24  | 11.85 |
| -5 | 2 | 6 | 788.65  | 11.51 |
| -5 | 2 | 6 | 734.06  | 11.34 |
| -5 | 2 | 6 | 753.62  | 10.44 |
| -5 | 2 | 6 | 834.25  | 10.66 |
| -5 | 2 | 6 | 772.86  | 9.42  |
| -5 | 2 | 6 | 764.86  | 10.94 |
| -5 | 2 | 6 | 788.24  | 11.33 |
| -5 | 2 | 7 | 508.21  | 9.21  |
| -5 | 2 | 7 | 504.90  | 9.18  |
| -5 | 2 | 7 | 508.91  | 9.19  |
| -5 | 2 | 7 | 510.60  | 9.24  |
| -5 | 2 | 7 | 486.02  | 8.29  |
| -5 | 2 | 7 | 481.13  | 9.51  |
| -5 | 2 | 7 | 480.80  | 9.01  |
| -5 | 2 | 7 | 519.14  | 8.37  |
| -5 | 2 | 7 | 487.87  | 8.70  |
| -5 | 2 | 7 | 494.82  | 8.68  |
| -5 | 2 | 7 | 515.04  | 8.19  |
| -5 | 2 | 7 | 486.03  | 8.10  |
| -5 | 2 | 7 | 490.95  | 7.32  |
| -5 | 2 | 7 | 491.03  | 8.07  |
| -5 | 2 | 8 | 36.47   | 2.09  |
| -5 | 2 | 8 | 40.48   | 2.35  |
| -5 | 2 | 8 | 45.76   | 2.87  |
| -5 | 2 | 8 | 36.03   | 2.15  |
| -5 | 2 | 8 | 41.38   | 2.65  |
| -5 | 2 | 8 | 42.35   | 2.62  |
| -5 | 2 | 8 | 40.41   | 2.56  |
| -5 | 2 | 8 | 41.12   | 2.68  |
| -5 | 2 | 8 | 38.36   | 2.54  |
| -5 | 2 | 8 | 34.92   | 1.85  |
| -5 | 2 | 8 | 45.21   | 2.87  |

## CIF 31

|    |   |    |         |       |
|----|---|----|---------|-------|
| -5 | 2 | 9  | 1076.52 | 16.03 |
| -5 | 2 | 9  | 1162.68 | 15.93 |
| -5 | 2 | 9  | 1191.92 | 16.53 |
| -5 | 2 | 9  | 1145.09 | 14.41 |
| -5 | 2 | 9  | 1190.80 | 14.90 |
| -5 | 2 | 9  | 1067.18 | 15.69 |
| -5 | 2 | 9  | 1077.40 | 15.85 |
| -5 | 2 | 9  | 1182.38 | 16.31 |
| -5 | 2 | 9  | 1000.35 | 13.45 |
| -5 | 2 | 9  | 1082.52 | 14.52 |
| -5 | 2 | 10 | 1023.91 | 15.49 |
| -5 | 2 | 10 | 929.09  | 14.26 |
| -5 | 2 | 10 | 1036.40 | 13.86 |
| -5 | 2 | 10 | 971.30  | 14.00 |
| -5 | 2 | 10 | 1049.77 | 15.67 |
| -5 | 2 | 10 | 981.64  | 14.73 |
| -5 | 2 | 10 | 899.83  | 12.82 |
| -5 | 2 | 10 | 980.15  | 13.20 |
| -5 | 2 | 10 | 983.12  | 14.71 |
| -5 | 2 | 11 | 203.51  | 6.30  |
| -5 | 2 | 11 | 206.64  | 5.36  |
| -5 | 2 | 11 | 199.99  | 4.96  |
| -5 | 2 | 11 | 191.83  | 5.72  |
| -5 | 2 | 11 | 199.07  | 6.25  |
| -5 | 2 | 11 | 195.33  | 6.33  |
| -5 | 2 | 11 | 213.77  | 5.75  |
| -5 | 2 | 11 | 186.69  | 6.05  |
| -5 | 2 | 11 | 205.39  | 6.36  |
| -5 | 2 | 11 | 202.15  | 5.83  |
| -5 | 2 | 11 | 206.69  | 5.25  |
| -5 | 2 | 12 | 30.67   | 2.59  |
| -5 | 2 | 12 | 32.96   | 2.63  |
| -5 | 2 | 12 | 34.14   | 2.26  |
| -5 | 2 | 12 | 31.99   | 2.60  |
| -5 | 2 | 12 | 29.64   | 2.16  |
| -5 | 2 | 12 | 31.45   | 2.22  |
| -5 | 2 | 12 | 36.71   | 2.62  |
| -5 | 2 | 12 | 32.44   | 2.64  |
| -5 | 2 | 12 | 32.50   | 2.07  |
| -5 | 2 | 12 | 36.64   | 2.74  |
| -5 | 2 | 13 | 63.19   | 2.99  |

## CIF 31

|    |   |     |        |      |
|----|---|-----|--------|------|
| -5 | 2 | 13  | 66.57  | 3.34 |
| -5 | 2 | 13  | 68.97  | 3.39 |
| -5 | 2 | 13  | 69.04  | 2.95 |
| -5 | 2 | 13  | 67.34  | 3.33 |
| -5 | 2 | 13  | 62.22  | 3.17 |
| -5 | 2 | 13  | 64.56  | 3.30 |
| -5 | 2 | 14  | 174.11 | 4.45 |
| -5 | 2 | 14  | 160.67 | 4.47 |
| -5 | 2 | 14  | 173.60 | 4.61 |
| -5 | 2 | 15  | 60.84  | 2.26 |
| -5 | 2 | 15  | 61.81  | 2.19 |
| -5 | 2 | 15  | 58.54  | 1.97 |
| -5 | 3 | -12 | 8.77   | 1.15 |
| -5 | 3 | -11 | 3.14   | 1.86 |
| -5 | 3 | -11 | 3.43   | 0.69 |
| -5 | 3 | -11 | 3.12   | 0.86 |
| -5 | 3 | -11 | 2.30   | 1.99 |
| -5 | 3 | -10 | 171.30 | 4.65 |
| -5 | 3 | -10 | 169.69 | 5.45 |
| -5 | 3 | -10 | 162.16 | 4.74 |
| -5 | 3 | -10 | 163.52 | 5.63 |
| -5 | 3 | -10 | 164.96 | 4.01 |
| -5 | 3 | -10 | 163.09 | 5.62 |
| -5 | 3 | -9  | 295.70 | 5.95 |
| -5 | 3 | -9  | 302.98 | 6.90 |
| -5 | 3 | -9  | 290.05 | 6.06 |
| -5 | 3 | -9  | 296.00 | 7.01 |
| -5 | 3 | -9  | 296.39 | 5.93 |
| -5 | 3 | -9  | 280.92 | 6.44 |
| -5 | 3 | -8  | 151.45 | 4.71 |
| -5 | 3 | -8  | 151.34 | 4.21 |
| -5 | 3 | -8  | 154.45 | 4.42 |
| -5 | 3 | -8  | 152.07 | 4.50 |
| -5 | 3 | -8  | 134.17 | 4.47 |
| -5 | 3 | -8  | 160.48 | 5.08 |
| -5 | 3 | -8  | 141.32 | 5.69 |
| -5 | 3 | -8  | 148.00 | 4.84 |
| -5 | 3 | -7  | 1.54   | 1.10 |
| -5 | 3 | -7  | 1.81   | 0.98 |
| -5 | 3 | -7  | 2.06   | 1.33 |
| -5 | 3 | -7  | 2.06   | 1.00 |

## CIF 31

|    |   |    |         |       |
|----|---|----|---------|-------|
| -5 | 3 | -7 | 0.32    | 0.74  |
| -5 | 3 | -7 | 1.27    | 1.07  |
| -5 | 3 | -7 | 3.17    | 1.63  |
| -5 | 3 | -6 | 626.64  | 9.65  |
| -5 | 3 | -6 | 635.78  | 12.23 |
| -5 | 3 | -6 | 620.03  | 9.98  |
| -5 | 3 | -6 | 632.04  | 9.99  |
| -5 | 3 | -6 | 659.44  | 9.42  |
| -5 | 3 | -6 | 651.08  | 10.36 |
| -5 | 3 | -5 | 394.53  | 6.83  |
| -5 | 3 | -5 | 399.79  | 8.97  |
| -5 | 3 | -5 | 373.84  | 7.06  |
| -5 | 3 | -5 | 395.50  | 7.27  |
| -5 | 3 | -5 | 389.37  | 6.51  |
| -5 | 3 | -5 | 392.73  | 7.29  |
| -5 | 3 | -4 | 1446.14 | 16.46 |
| -5 | 3 | -4 | 1424.78 | 16.69 |
| -5 | 3 | -4 | 1387.20 | 19.42 |
| -5 | 3 | -4 | 1496.63 | 16.73 |
| -5 | 3 | -4 | 1426.00 | 15.73 |
| -5 | 3 | -4 | 1467.93 | 19.32 |
| -5 | 3 | -4 | 1420.86 | 16.14 |
| -5 | 3 | -4 | 1445.79 | 16.69 |
| -5 | 3 | -3 | 1.45    | 0.72  |
| -5 | 3 | -3 | 2.24    | 0.79  |
| -5 | 3 | -3 | 2.49    | 0.77  |
| -5 | 3 | -3 | 2.38    | 1.08  |
| -5 | 3 | -3 | 0.89    | 0.44  |
| -5 | 3 | -3 | 1.26    | 0.67  |
| -5 | 3 | -2 | 108.85  | 3.09  |
| -5 | 3 | -2 | 100.90  | 4.06  |
| -5 | 3 | -2 | 100.23  | 3.83  |
| -5 | 3 | -2 | 104.75  | 3.03  |
| -5 | 3 | -2 | 108.81  | 3.49  |
| -5 | 3 | -2 | 114.81  | 2.60  |
| -5 | 3 | -1 | 7.55    | 1.01  |
| -5 | 3 | -1 | 7.01    | 1.04  |
| -5 | 3 | -1 | 5.11    | 1.18  |
| -5 | 3 | -1 | 7.27    | 1.22  |
| -5 | 3 | -1 | 7.56    | 0.71  |
| -5 | 3 | -1 | 8.61    | 1.23  |

## CIF 31

|    |   |    |         |       |
|----|---|----|---------|-------|
| -5 | 3 | -1 | 6.24    | 1.88  |
| -5 | 3 | 0  | 565.75  | 8.70  |
| -5 | 3 | 0  | 553.28  | 9.60  |
| -5 | 3 | 0  | 585.82  | 8.71  |
| -5 | 3 | 0  | 541.37  | 7.60  |
| -5 | 3 | 0  | 547.99  | 9.11  |
| -5 | 3 | 0  | 541.78  | 9.27  |
| -5 | 3 | 0  | 553.09  | 9.00  |
| -5 | 3 | 0  | 509.45  | 6.76  |
| -5 | 3 | 0  | 564.00  | 6.97  |
| -5 | 3 | 1  | 4293.42 | 42.41 |
| -5 | 3 | 1  | 4864.02 | 42.48 |
| -5 | 3 | 1  | 4531.24 | 42.13 |
| -5 | 3 | 1  | 4385.42 | 39.39 |
| -5 | 3 | 1  | 4561.17 | 41.43 |
| -5 | 3 | 1  | 4657.12 | 40.64 |
| -5 | 3 | 1  | 4405.89 | 43.64 |
| -5 | 3 | 1  | 4697.15 | 40.04 |
| -5 | 3 | 1  | 4276.10 | 42.39 |
| -5 | 3 | 1  | 4674.29 | 42.39 |
| -5 | 3 | 2  | 1571.04 | 17.05 |
| -5 | 3 | 2  | 1763.41 | 17.29 |
| -5 | 3 | 2  | 1700.77 | 18.56 |
| -5 | 3 | 2  | 1585.16 | 17.52 |
| -5 | 3 | 2  | 1668.13 | 16.97 |
| -5 | 3 | 2  | 1667.91 | 19.91 |
| -5 | 3 | 2  | 1689.26 | 17.10 |
| -5 | 3 | 2  | 1661.73 | 18.96 |
| -5 | 3 | 2  | 1539.91 | 18.55 |
| -5 | 3 | 2  | 1642.53 | 17.93 |
| -5 | 3 | 2  | 1450.46 | 18.09 |
| -5 | 3 | 2  | 1690.84 | 16.08 |
| -5 | 3 | 2  | 1708.93 | 18.64 |
| -5 | 3 | 3  | 35.52   | 2.09  |
| -5 | 3 | 3  | 30.70   | 1.96  |
| -5 | 3 | 3  | 37.74   | 2.16  |
| -5 | 3 | 3  | 36.98   | 1.81  |
| -5 | 3 | 3  | 47.58   | 1.99  |
| -5 | 3 | 3  | 40.14   | 2.15  |
| -5 | 3 | 3  | 39.99   | 2.05  |
| -5 | 3 | 3  | 43.37   | 1.60  |

## CIF 31

|    |   |   |        |      |
|----|---|---|--------|------|
| -5 | 3 | 3 | 37.25  | 2.13 |
| -5 | 3 | 3 | 38.87  | 2.12 |
| -5 | 3 | 3 | 35.23  | 2.35 |
| -5 | 3 | 3 | 36.45  | 1.85 |
| -5 | 3 | 3 | 44.92  | 1.94 |
| -5 | 3 | 3 | 41.71  | 1.57 |
| -5 | 3 | 3 | 37.99  | 1.63 |
| -5 | 3 | 3 | 37.06  | 2.23 |
| -5 | 3 | 3 | 41.66  | 1.88 |
| -5 | 3 | 4 | 115.78 | 3.96 |
| -5 | 3 | 4 | 113.65 | 3.77 |
| -5 | 3 | 4 | 108.39 | 3.08 |
| -5 | 3 | 4 | 108.65 | 3.50 |
| -5 | 3 | 4 | 114.51 | 3.70 |
| -5 | 3 | 4 | 119.15 | 4.18 |
| -5 | 3 | 4 | 107.00 | 3.59 |
| -5 | 3 | 4 | 107.40 | 2.10 |
| -5 | 3 | 4 | 108.37 | 3.12 |
| -5 | 3 | 4 | 108.52 | 3.60 |
| -5 | 3 | 4 | 117.91 | 3.26 |
| -5 | 3 | 4 | 113.97 | 3.54 |
| -5 | 3 | 4 | 112.60 | 3.41 |
| -5 | 3 | 4 | 108.59 | 2.72 |
| -5 | 3 | 4 | 115.74 | 2.99 |
| -5 | 3 | 4 | 114.49 | 3.74 |
| -5 | 3 | 5 | 117.14 | 3.36 |
| -5 | 3 | 5 | 114.82 | 3.82 |
| -5 | 3 | 5 | 122.90 | 4.10 |
| -5 | 3 | 5 | 97.11  | 3.86 |
| -5 | 3 | 5 | 114.55 | 2.45 |
| -5 | 3 | 5 | 124.69 | 3.36 |
| -5 | 3 | 5 | 128.80 | 3.96 |
| -5 | 3 | 5 | 134.94 | 4.44 |
| -5 | 3 | 5 | 119.91 | 3.79 |
| -5 | 3 | 5 | 115.38 | 3.33 |
| -5 | 3 | 5 | 121.50 | 3.60 |
| -5 | 3 | 5 | 121.98 | 3.06 |
| -5 | 3 | 5 | 129.13 | 4.00 |
| -5 | 3 | 5 | 133.31 | 4.15 |
| -5 | 3 | 6 | 65.29  | 2.48 |
| -5 | 3 | 6 | 66.54  | 2.86 |

## CIF 31

|    |   |   |        |       |
|----|---|---|--------|-------|
| -5 | 3 | 6 | 59.83  | 2.51  |
| -5 | 3 | 6 | 67.94  | 3.07  |
| -5 | 3 | 6 | 54.22  | 2.87  |
| -5 | 3 | 6 | 69.57  | 3.30  |
| -5 | 3 | 6 | 60.54  | 3.04  |
| -5 | 3 | 6 | 65.01  | 3.09  |
| -5 | 3 | 6 | 57.44  | 2.62  |
| -5 | 3 | 6 | 64.61  | 3.02  |
| -5 | 3 | 6 | 64.70  | 1.97  |
| -5 | 3 | 6 | 70.22  | 3.24  |
| -5 | 3 | 6 | 60.88  | 2.68  |
| -5 | 3 | 6 | 65.06  | 2.38  |
| -5 | 3 | 6 | 60.00  | 2.79  |
| -5 | 3 | 7 | 398.12 | 8.33  |
| -5 | 3 | 7 | 393.03 | 8.48  |
| -5 | 3 | 7 | 395.97 | 6.87  |
| -5 | 3 | 7 | 392.11 | 7.93  |
| -5 | 3 | 7 | 383.65 | 7.40  |
| -5 | 3 | 7 | 397.97 | 8.38  |
| -5 | 3 | 7 | 402.41 | 8.50  |
| -5 | 3 | 7 | 428.55 | 6.98  |
| -5 | 3 | 7 | 393.43 | 7.72  |
| -5 | 3 | 7 | 431.33 | 7.34  |
| -5 | 3 | 7 | 415.39 | 8.41  |
| -5 | 3 | 7 | 384.72 | 7.36  |
| -5 | 3 | 7 | 375.82 | 7.55  |
| -5 | 3 | 8 | 29.21  | 2.40  |
| -5 | 3 | 8 | 35.70  | 2.10  |
| -5 | 3 | 8 | 38.02  | 2.04  |
| -5 | 3 | 8 | 36.43  | 2.63  |
| -5 | 3 | 8 | 36.20  | 2.61  |
| -5 | 3 | 8 | 36.90  | 2.30  |
| -5 | 3 | 8 | 33.09  | 2.30  |
| -5 | 3 | 8 | 32.82  | 2.62  |
| -5 | 3 | 8 | 31.56  | 2.53  |
| -5 | 3 | 8 | 34.55  | 2.03  |
| -5 | 3 | 8 | 30.93  | 2.11  |
| -5 | 3 | 8 | 35.78  | 2.45  |
| -5 | 3 | 9 | 614.66 | 11.21 |
| -5 | 3 | 9 | 553.83 | 10.73 |
| -5 | 3 | 9 | 576.74 | 11.29 |

## CIF 31

|    |   |    |        |       |
|----|---|----|--------|-------|
| -5 | 3 | 9  | 604.16 | 10.34 |
| -5 | 3 | 9  | 558.67 | 9.40  |
| -5 | 3 | 9  | 579.56 | 9.03  |
| -5 | 3 | 9  | 677.85 | 9.98  |
| -5 | 3 | 9  | 570.58 | 11.16 |
| -5 | 3 | 9  | 635.21 | 10.43 |
| -5 | 3 | 9  | 629.15 | 11.58 |
| -5 | 3 | 9  | 626.89 | 11.24 |
| -5 | 3 | 9  | 638.44 | 11.55 |
| -5 | 3 | 10 | 746.11 | 13.23 |
| -5 | 3 | 10 | 775.99 | 11.99 |
| -5 | 3 | 10 | 722.27 | 12.43 |
| -5 | 3 | 10 | 690.33 | 13.04 |
| -5 | 3 | 10 | 743.96 | 12.82 |
| -5 | 3 | 10 | 780.52 | 13.14 |
| -5 | 3 | 10 | 733.09 | 12.83 |
| -5 | 3 | 10 | 746.86 | 10.46 |
| -5 | 3 | 10 | 744.43 | 11.00 |
| -5 | 3 | 10 | 796.82 | 11.56 |
| -5 | 3 | 11 | 79.53  | 3.82  |
| -5 | 3 | 11 | 83.40  | 3.49  |
| -5 | 3 | 11 | 77.43  | 3.54  |
| -5 | 3 | 11 | 77.23  | 3.71  |
| -5 | 3 | 11 | 78.38  | 3.88  |
| -5 | 3 | 11 | 86.03  | 3.39  |
| -5 | 3 | 11 | 87.06  | 3.06  |
| -5 | 3 | 12 | 145.24 | 4.72  |
| -5 | 3 | 12 | 157.78 | 5.32  |
| -5 | 3 | 12 | 142.46 | 5.01  |
| -5 | 3 | 12 | 139.05 | 4.60  |
| -5 | 3 | 12 | 147.60 | 4.50  |
| -5 | 3 | 12 | 152.75 | 5.27  |
| -5 | 3 | 12 | 145.16 | 5.21  |
| -5 | 3 | 12 | 153.87 | 4.42  |
| -5 | 3 | 12 | 145.10 | 5.08  |
| -5 | 3 | 13 | 56.64  | 2.81  |
| -5 | 3 | 13 | 61.59  | 3.11  |
| -5 | 3 | 13 | 59.54  | 2.95  |
| -5 | 3 | 13 | 57.76  | 3.06  |
| -5 | 3 | 13 | 56.04  | 2.98  |
| -5 | 3 | 13 | 56.89  | 2.95  |



## CIF 31

|    |   |     |        |       |
|----|---|-----|--------|-------|
| -5 | 3 | 14  | 8.32   | 1.22  |
| -5 | 3 | 14  | 7.69   | 1.16  |
| -5 | 3 | 14  | 9.24   | 1.16  |
| -5 | 3 | 14  | 8.67   | 1.13  |
| -5 | 3 | 14  | 6.83   | 0.88  |
| -5 | 4 | -12 | 146.80 | 3.22  |
| -5 | 4 | -12 | 117.59 | 3.83  |
| -5 | 4 | -11 | 6.40   | 1.38  |
| -5 | 4 | -11 | 7.26   | 1.12  |
| -5 | 4 | -10 | 190.54 | 6.21  |
| -5 | 4 | -10 | 184.80 | 4.07  |
| -5 | 4 | -10 | 181.04 | 4.72  |
| -5 | 4 | -9  | 155.63 | 4.01  |
| -5 | 4 | -9  | 173.70 | 4.69  |
| -5 | 4 | -9  | 162.51 | 5.16  |
| -5 | 4 | -9  | 168.55 | 4.77  |
| -5 | 4 | -9  | 154.95 | 6.15  |
| -5 | 4 | -9  | 167.56 | 5.22  |
| -5 | 4 | -9  | 185.95 | 5.17  |
| -5 | 4 | -9  | 164.34 | 5.12  |
| -5 | 4 | -8  | 532.38 | 9.69  |
| -5 | 4 | -8  | 493.52 | 10.90 |
| -5 | 4 | -8  | 550.29 | 9.93  |
| -5 | 4 | -8  | 530.75 | 9.17  |
| -5 | 4 | -8  | 509.86 | 8.06  |
| -5 | 4 | -8  | 526.73 | 9.06  |
| -5 | 4 | -8  | 490.43 | 9.19  |
| -5 | 4 | -8  | 515.52 | 8.97  |
| -5 | 4 | -7  | 28.53  | 2.29  |
| -5 | 4 | -7  | 27.42  | 2.14  |
| -5 | 4 | -7  | 27.75  | 2.11  |
| -5 | 4 | -7  | 28.76  | 2.05  |
| -5 | 4 | -7  | 23.49  | 2.73  |
| -5 | 4 | -7  | 29.15  | 2.13  |
| -5 | 4 | -7  | 26.01  | 2.28  |
| -5 | 4 | -7  | 29.33  | 2.22  |
| -5 | 4 | -6  | 16.44  | 1.72  |
| -5 | 4 | -6  | 13.94  | 1.58  |
| -5 | 4 | -6  | 10.66  | 1.88  |
| -5 | 4 | -6  | 15.11  | 1.46  |
| -5 | 4 | -6  | 16.59  | 2.28  |

## CIF 31

|    |   |    |         |       |
|----|---|----|---------|-------|
| -5 | 4 | -6 | 15.69   | 1.62  |
| -5 | 4 | -6 | 15.48   | 1.72  |
| -5 | 4 | -5 | 936.61  | 12.86 |
| -5 | 4 | -5 | 990.93  | 15.70 |
| -5 | 4 | -5 | 956.37  | 12.10 |
| -5 | 4 | -5 | 959.49  | 11.55 |
| -5 | 4 | -5 | 877.76  | 12.56 |
| -5 | 4 | -5 | 975.63  | 12.92 |
| -5 | 4 | -5 | 986.74  | 12.81 |
| -5 | 4 | -5 | 1059.57 | 15.80 |
| -5 | 4 | -4 | 524.12  | 8.46  |
| -5 | 4 | -4 | 553.38  | 8.69  |
| -5 | 4 | -4 | 531.15  | 10.68 |
| -5 | 4 | -4 | 526.11  | 8.43  |
| -5 | 4 | -4 | 570.76  | 8.02  |
| -5 | 4 | -4 | 555.59  | 7.67  |
| -5 | 4 | -4 | 531.63  | 8.45  |
| -5 | 4 | -4 | 531.62  | 10.61 |
| -5 | 4 | -4 | 558.31  | 8.42  |
| -5 | 4 | -3 | 641.25  | 11.23 |
| -5 | 4 | -3 | 596.99  | 7.81  |
| -5 | 4 | -3 | 583.96  | 10.25 |
| -5 | 4 | -3 | 547.10  | 8.38  |
| -5 | 4 | -3 | 603.72  | 10.60 |
| -5 | 4 | -3 | 572.66  | 7.75  |
| -5 | 4 | -3 | 619.51  | 11.08 |
| -5 | 4 | -3 | 586.23  | 8.64  |
| -5 | 4 | -3 | 550.52  | 8.36  |
| -5 | 4 | -3 | 579.63  | 8.66  |
| -5 | 4 | -2 | 8.78    | 1.01  |
| -5 | 4 | -2 | 8.38    | 1.04  |
| -5 | 4 | -2 | 6.80    | 0.93  |
| -5 | 4 | -2 | 8.59    | 1.41  |
| -5 | 4 | -2 | 9.30    | 1.14  |
| -5 | 4 | -2 | 7.93    | 0.95  |
| -5 | 4 | -2 | 8.43    | 1.28  |
| -5 | 4 | -2 | 7.67    | 1.37  |
| -5 | 4 | -2 | 8.40    | 1.34  |
| -5 | 4 | -2 | 6.74    | 0.93  |
| -5 | 4 | -2 | 8.57    | 1.02  |
| -5 | 4 | -2 | 8.51    | 1.38  |

## CIF 31

|    |   |    |        |       |
|----|---|----|--------|-------|
| -5 | 4 | -1 | 326.46 | 7.32  |
| -5 | 4 | -1 | 318.70 | 5.40  |
| -5 | 4 | -1 | 315.19 | 7.08  |
| -5 | 4 | -1 | 340.11 | 6.24  |
| -5 | 4 | -1 | 312.83 | 7.27  |
| -5 | 4 | -1 | 324.24 | 6.13  |
| -5 | 4 | -1 | 330.30 | 6.44  |
| -5 | 4 | -1 | 347.91 | 7.34  |
| -5 | 4 | -1 | 340.33 | 5.23  |
| -5 | 4 | -1 | 333.76 | 6.97  |
| -5 | 4 | -1 | 330.38 | 6.89  |
| -5 | 4 | -1 | 339.90 | 6.46  |
| -5 | 4 | 0  | 129.68 | 4.16  |
| -5 | 4 | 0  | 119.74 | 3.51  |
| -5 | 4 | 0  | 133.11 | 3.77  |
| -5 | 4 | 0  | 130.17 | 4.26  |
| -5 | 4 | 0  | 119.34 | 3.31  |
| -5 | 4 | 0  | 121.52 | 4.21  |
| -5 | 4 | 0  | 115.98 | 2.95  |
| -5 | 4 | 0  | 128.21 | 2.97  |
| -5 | 4 | 0  | 116.35 | 3.70  |
| -5 | 4 | 0  | 126.50 | 4.35  |
| -5 | 4 | 0  | 114.98 | 3.84  |
| -5 | 4 | 0  | 124.37 | 3.33  |
| -5 | 4 | 0  | 121.21 | 3.99  |
| -5 | 4 | 0  | 121.27 | 3.73  |
| -5 | 4 | 1  | 749.36 | 10.92 |
| -5 | 4 | 1  | 786.38 | 11.07 |
| -5 | 4 | 1  | 860.19 | 11.80 |
| -5 | 4 | 1  | 765.80 | 9.39  |
| -5 | 4 | 1  | 798.77 | 10.82 |
| -5 | 4 | 1  | 843.70 | 11.73 |
| -5 | 4 | 1  | 807.30 | 10.96 |
| -5 | 4 | 1  | 825.54 | 11.57 |
| -5 | 4 | 1  | 737.24 | 10.38 |
| -5 | 4 | 1  | 836.97 | 11.42 |
| -5 | 4 | 1  | 729.31 | 9.80  |
| -5 | 4 | 1  | 783.92 | 9.01  |
| -5 | 4 | 1  | 733.19 | 10.17 |
| -5 | 4 | 1  | 738.11 | 11.13 |
| -5 | 4 | 2  | 17.70  | 1.53  |

## CIF 31

|    |   |   |        |      |
|----|---|---|--------|------|
| -5 | 4 | 2 | 17.03  | 1.45 |
| -5 | 4 | 2 | 16.96  | 1.36 |
| -5 | 4 | 2 | 18.06  | 0.85 |
| -5 | 4 | 2 | 17.14  | 1.53 |
| -5 | 4 | 2 | 15.35  | 1.43 |
| -5 | 4 | 2 | 18.33  | 1.28 |
| -5 | 4 | 2 | 17.27  | 1.35 |
| -5 | 4 | 2 | 14.80  | 1.52 |
| -5 | 4 | 2 | 19.39  | 1.21 |
| -5 | 4 | 2 | 18.65  | 1.23 |
| -5 | 4 | 2 | 16.76  | 1.53 |
| -5 | 4 | 2 | 18.56  | 1.67 |
| -5 | 4 | 2 | 15.24  | 1.68 |
| -5 | 4 | 2 | 18.07  | 1.60 |
| -5 | 4 | 3 | 118.66 | 3.91 |
| -5 | 4 | 3 | 126.31 | 3.91 |
| -5 | 4 | 3 | 119.57 | 3.60 |
| -5 | 4 | 3 | 116.27 | 2.39 |
| -5 | 4 | 3 | 121.76 | 3.38 |
| -5 | 4 | 3 | 125.71 | 3.62 |
| -5 | 4 | 3 | 125.52 | 4.15 |
| -5 | 4 | 3 | 113.74 | 3.81 |
| -5 | 4 | 3 | 127.45 | 3.35 |
| -5 | 4 | 3 | 117.14 | 3.84 |
| -5 | 4 | 3 | 125.57 | 3.90 |
| -5 | 4 | 3 | 119.02 | 3.95 |
| -5 | 4 | 3 | 126.53 | 3.10 |
| -5 | 4 | 3 | 118.84 | 3.17 |
| -5 | 4 | 3 | 129.41 | 4.47 |
| -5 | 4 | 4 | 185.16 | 5.10 |
| -5 | 4 | 4 | 182.73 | 4.84 |
| -5 | 4 | 4 | 187.32 | 5.04 |
| -5 | 4 | 4 | 198.00 | 5.21 |
| -5 | 4 | 4 | 183.24 | 3.35 |
| -5 | 4 | 4 | 196.08 | 4.26 |
| -5 | 4 | 4 | 198.16 | 4.13 |
| -5 | 4 | 4 | 191.05 | 5.04 |
| -5 | 4 | 4 | 163.12 | 5.13 |
| -5 | 4 | 4 | 184.00 | 5.10 |
| -5 | 4 | 4 | 180.34 | 4.60 |
| -5 | 4 | 4 | 185.07 | 4.86 |

## CIF 31

|    |   |   |         |       |
|----|---|---|---------|-------|
| -5 | 4 | 4 | 201.90  | 4.13  |
| -5 | 4 | 4 | 182.86  | 5.22  |
| -5 | 4 | 4 | 203.64  | 4.20  |
| -5 | 4 | 4 | 175.48  | 4.32  |
| -5 | 4 | 4 | 192.28  | 5.11  |
| -5 | 4 | 5 | 2941.01 | 26.93 |
| -5 | 4 | 5 | 2789.82 | 30.75 |
| -5 | 4 | 5 | 2950.38 | 30.45 |
| -5 | 4 | 5 | 2676.20 | 30.01 |
| -5 | 4 | 5 | 2889.29 | 31.30 |
| -5 | 4 | 5 | 2699.02 | 28.08 |
| -5 | 4 | 5 | 3070.51 | 30.17 |
| -5 | 4 | 5 | 2883.31 | 30.16 |
| -5 | 4 | 5 | 2961.12 | 28.96 |
| -5 | 4 | 5 | 3259.19 | 31.49 |
| -5 | 4 | 5 | 3191.87 | 31.78 |
| -5 | 4 | 5 | 3007.49 | 31.05 |
| -5 | 4 | 5 | 3037.03 | 28.44 |
| -5 | 4 | 5 | 2795.96 | 29.42 |
| -5 | 4 | 5 | 3032.02 | 28.86 |
| -5 | 4 | 5 | 3013.17 | 28.21 |
| -5 | 4 | 6 | 521.39  | 9.33  |
| -5 | 4 | 6 | 594.94  | 10.54 |
| -5 | 4 | 6 | 542.25  | 9.62  |
| -5 | 4 | 6 | 579.82  | 9.88  |
| -5 | 4 | 6 | 553.15  | 8.91  |
| -5 | 4 | 6 | 526.55  | 10.05 |
| -5 | 4 | 6 | 553.60  | 8.01  |
| -5 | 4 | 6 | 497.76  | 8.05  |
| -5 | 4 | 6 | 535.61  | 7.45  |
| -5 | 4 | 6 | 488.74  | 8.47  |
| -5 | 4 | 6 | 551.28  | 8.33  |
| -5 | 4 | 6 | 528.72  | 8.83  |
| -5 | 4 | 6 | 606.41  | 10.26 |
| -5 | 4 | 7 | 460.19  | 7.28  |
| -5 | 4 | 7 | 469.33  | 7.13  |
| -5 | 4 | 7 | 478.51  | 9.66  |
| -5 | 4 | 7 | 486.29  | 8.46  |
| -5 | 4 | 7 | 490.79  | 9.86  |
| -5 | 4 | 7 | 424.91  | 9.23  |
| -5 | 4 | 7 | 506.76  | 7.95  |

## CIF 31

|    |   |    |        |       |
|----|---|----|--------|-------|
| -5 | 4 | 7  | 466.21 | 9.52  |
| -5 | 4 | 7  | 425.18 | 8.38  |
| -5 | 4 | 7  | 468.15 | 8.98  |
| -5 | 4 | 7  | 432.90 | 7.68  |
| -5 | 4 | 7  | 444.57 | 8.57  |
| -5 | 4 | 7  | 442.63 | 9.15  |
| -5 | 4 | 7  | 479.95 | 9.30  |
| -5 | 4 | 8  | 3.35   | 1.40  |
| -5 | 4 | 8  | 1.44   | 1.24  |
| -5 | 4 | 8  | 4.75   | 1.34  |
| -5 | 4 | 8  | 4.89   | 0.85  |
| -5 | 4 | 8  | 0.75   | 0.67  |
| -5 | 4 | 8  | 1.06   | 0.89  |
| -5 | 4 | 8  | 2.64   | 1.22  |
| -5 | 4 | 8  | 2.60   | 0.90  |
| -5 | 4 | 8  | 2.52   | 1.31  |
| -5 | 4 | 8  | 2.16   | 1.07  |
| -5 | 4 | 8  | 2.31   | 1.06  |
| -5 | 4 | 8  | 2.45   | 0.91  |
| -5 | 4 | 8  | 1.79   | 1.25  |
| -5 | 4 | 9  | 554.34 | 11.21 |
| -5 | 4 | 9  | 552.98 | 10.64 |
| -5 | 4 | 9  | 566.56 | 9.88  |
| -5 | 4 | 9  | 607.45 | 8.95  |
| -5 | 4 | 9  | 564.25 | 11.07 |
| -5 | 4 | 9  | 557.74 | 11.35 |
| -5 | 4 | 9  | 545.70 | 10.55 |
| -5 | 4 | 9  | 562.85 | 11.22 |
| -5 | 4 | 9  | 547.62 | 9.43  |
| -5 | 4 | 9  | 548.09 | 9.75  |
| -5 | 4 | 9  | 515.22 | 10.07 |
| -5 | 4 | 10 | 113.18 | 4.80  |
| -5 | 4 | 10 | 101.28 | 4.43  |
| -5 | 4 | 10 | 104.68 | 4.62  |
| -5 | 4 | 10 | 110.86 | 4.85  |
| -5 | 4 | 10 | 130.52 | 4.33  |
| -5 | 4 | 10 | 132.71 | 3.85  |
| -5 | 4 | 10 | 107.76 | 4.74  |
| -5 | 4 | 10 | 120.32 | 4.11  |
| -5 | 4 | 10 | 113.21 | 4.64  |
| -5 | 4 | 10 | 105.55 | 4.06  |

## CIF 31

|    |   |     |         |       |
|----|---|-----|---------|-------|
| -5 | 4 | 11  | 1233.80 | 17.77 |
| -5 | 4 | 11  | 1191.04 | 17.48 |
| -5 | 4 | 11  | 1194.66 | 16.61 |
| -5 | 4 | 11  | 1186.19 | 17.06 |
| -5 | 4 | 11  | 1201.53 | 15.62 |
| -5 | 4 | 11  | 1154.09 | 14.38 |
| -5 | 4 | 11  | 1231.25 | 15.64 |
| -5 | 4 | 11  | 1156.75 | 16.88 |
| -5 | 4 | 11  | 1214.73 | 17.07 |
| -5 | 4 | 12  | 260.94  | 6.62  |
| -5 | 4 | 12  | 241.16  | 6.39  |
| -5 | 4 | 12  | 243.46  | 5.50  |
| -5 | 4 | 12  | 252.23  | 6.51  |
| -5 | 4 | 12  | 250.38  | 6.43  |
| -5 | 4 | 12  | 246.55  | 6.18  |
| -5 | 4 | 13  | 274.36  | 6.18  |
| -5 | 4 | 13  | 272.71  | 6.11  |
| -5 | 4 | 13  | 258.99  | 5.79  |
| -5 | 4 | 14  | 3.70    | 0.77  |
| -5 | 5 | -12 | 33.89   | 1.97  |
| -5 | 5 | -12 | 33.98   | 1.58  |
| -5 | 5 | -11 | 179.59  | 5.08  |
| -5 | 5 | -11 | 194.26  | 4.69  |
| -5 | 5 | -11 | 193.31  | 4.70  |
| -5 | 5 | -10 | 37.97   | 2.97  |
| -5 | 5 | -10 | 35.86   | 2.15  |
| -5 | 5 | -10 | 36.68   | 4.53  |
| -5 | 5 | -10 | 38.34   | 4.18  |
| -5 | 5 | -9  | 246.24  | 6.15  |
| -5 | 5 | -9  | 247.03  | 5.87  |
| -5 | 5 | -9  | 252.76  | 5.95  |
| -5 | 5 | -9  | 243.12  | 6.09  |
| -5 | 5 | -8  | 1291.90 | 16.64 |
| -5 | 5 | -8  | 1266.26 | 16.30 |
| -5 | 5 | -8  | 1272.46 | 15.98 |
| -5 | 5 | -7  | 653.35  | 10.44 |
| -5 | 5 | -7  | 547.98  | 11.78 |
| -5 | 5 | -7  | 623.44  | 10.30 |
| -5 | 5 | -7  | 599.83  | 9.80  |
| -5 | 5 | -7  | 624.23  | 10.31 |
| -5 | 5 | -7  | 641.23  | 10.81 |

## CIF 31

|    |   |    |        |       |
|----|---|----|--------|-------|
| -5 | 5 | -7 | 586.86 | 12.59 |
| -5 | 5 | -7 | 601.47 | 10.17 |
| -5 | 5 | -6 | 407.13 | 7.74  |
| -5 | 5 | -6 | 375.04 | 9.99  |
| -5 | 5 | -6 | 374.83 | 8.19  |
| -5 | 5 | -6 | 411.54 | 7.39  |
| -5 | 5 | -6 | 418.36 | 7.95  |
| -5 | 5 | -6 | 415.24 | 7.77  |
| -5 | 5 | -6 | 403.44 | 8.07  |
| -5 | 5 | -6 | 409.28 | 7.14  |
| -5 | 5 | -5 | 704.75 | 13.35 |
| -5 | 5 | -5 | 720.61 | 10.04 |
| -5 | 5 | -5 | 698.73 | 10.47 |
| -5 | 5 | -5 | 722.03 | 13.23 |
| -5 | 5 | -5 | 718.87 | 10.04 |
| -5 | 5 | -5 | 713.02 | 11.26 |
| -5 | 5 | -5 | 736.46 | 10.94 |
| -5 | 5 | -5 | 721.77 | 10.69 |
| -5 | 5 | -4 | 130.25 | 3.75  |
| -5 | 5 | -4 | 108.27 | 4.30  |
| -5 | 5 | -4 | 133.21 | 5.29  |
| -5 | 5 | -4 | 115.57 | 3.75  |
| -5 | 5 | -4 | 115.17 | 4.91  |
| -5 | 5 | -4 | 128.69 | 3.77  |
| -5 | 5 | -4 | 131.87 | 3.47  |
| -5 | 5 | -4 | 129.97 | 3.80  |
| -5 | 5 | -4 | 133.04 | 3.51  |
| -5 | 5 | -4 | 113.55 | 4.61  |
| -5 | 5 | -4 | 120.92 | 4.93  |
| -5 | 5 | -3 | 32.53  | 2.48  |
| -5 | 5 | -3 | 24.41  | 1.59  |
| -5 | 5 | -3 | 28.47  | 2.08  |
| -5 | 5 | -3 | 28.61  | 2.27  |
| -5 | 5 | -3 | 31.63  | 2.56  |
| -5 | 5 | -3 | 29.25  | 1.53  |
| -5 | 5 | -3 | 27.46  | 1.68  |
| -5 | 5 | -3 | 33.25  | 1.70  |
| -5 | 5 | -3 | 27.54  | 2.32  |
| -5 | 5 | -3 | 29.14  | 1.80  |
| -5 | 5 | -3 | 28.03  | 1.80  |
| -5 | 5 | -2 | 19.29  | 1.57  |



## CIF 31

|    |   |    |         |       |
|----|---|----|---------|-------|
| -5 | 5 | -2 | 14.84   | 1.22  |
| -5 | 5 | -2 | 23.59   | 2.08  |
| -5 | 5 | -2 | 22.69   | 2.08  |
| -5 | 5 | -2 | 18.94   | 1.55  |
| -5 | 5 | -2 | 16.37   | 1.32  |
| -5 | 5 | -2 | 19.23   | 2.09  |
| -5 | 5 | -2 | 20.15   | 1.81  |
| -5 | 5 | -2 | 19.02   | 1.32  |
| -5 | 5 | -2 | 14.96   | 1.29  |
| -5 | 5 | -2 | 17.81   | 1.79  |
| -5 | 5 | -2 | 23.90   | 2.08  |
| -5 | 5 | -2 | 16.66   | 1.25  |
| -5 | 5 | -1 | 1160.58 | 13.20 |
| -5 | 5 | -1 | 1085.66 | 14.65 |
| -5 | 5 | -1 | 1189.61 | 16.16 |
| -5 | 5 | -1 | 1142.69 | 15.67 |
| -5 | 5 | -1 | 1157.50 | 13.78 |
| -5 | 5 | -1 | 1015.64 | 12.48 |
| -5 | 5 | -1 | 1098.69 | 11.63 |
| -5 | 5 | -1 | 1133.20 | 15.80 |
| -5 | 5 | -1 | 1200.25 | 15.87 |
| -5 | 5 | -1 | 1172.13 | 14.32 |
| -5 | 5 | -1 | 1097.27 | 12.53 |
| -5 | 5 | -1 | 1103.66 | 15.12 |
| -5 | 5 | -1 | 1043.12 | 12.66 |
| -5 | 5 | -1 | 1119.43 | 14.27 |
| -5 | 5 | -1 | 1113.25 | 14.14 |
| -5 | 5 | 0  | 150.59  | 4.04  |
| -5 | 5 | 0  | 154.94  | 4.73  |
| -5 | 5 | 0  | 144.45  | 4.76  |
| -5 | 5 | 0  | 156.40  | 4.78  |
| -5 | 5 | 0  | 149.81  | 3.78  |
| -5 | 5 | 0  | 151.40  | 4.77  |
| -5 | 5 | 0  | 160.49  | 4.24  |
| -5 | 5 | 0  | 145.47  | 4.49  |
| -5 | 5 | 0  | 160.86  | 3.61  |
| -5 | 5 | 0  | 151.36  | 3.71  |
| -5 | 5 | 0  | 147.77  | 2.97  |
| -5 | 5 | 0  | 152.03  | 4.42  |
| -5 | 5 | 0  | 149.90  | 4.62  |
| -5 | 5 | 0  | 152.34  | 5.05  |

## CIF 31

|    |   |   |        |      |
|----|---|---|--------|------|
| -5 | 5 | 0 | 141.53 | 4.26 |
| -5 | 5 | 0 | 149.55 | 4.33 |
| -5 | 5 | 1 | 430.43 | 7.09 |
| -5 | 5 | 1 | 426.84 | 7.63 |
| -5 | 5 | 1 | 425.00 | 8.27 |
| -5 | 5 | 1 | 439.43 | 5.81 |
| -5 | 5 | 1 | 429.46 | 7.56 |
| -5 | 5 | 1 | 442.70 | 8.24 |
| -5 | 5 | 1 | 421.80 | 7.92 |
| -5 | 5 | 1 | 441.03 | 8.02 |
| -5 | 5 | 1 | 450.40 | 8.21 |
| -5 | 5 | 1 | 438.29 | 7.34 |
| -5 | 5 | 1 | 451.95 | 6.89 |
| -5 | 5 | 1 | 433.00 | 8.26 |
| -5 | 5 | 1 | 423.41 | 7.97 |
| -5 | 5 | 2 | 0.74   | 0.86 |
| -5 | 5 | 2 | 1.12   | 0.94 |
| -5 | 5 | 2 | 0.87   | 0.65 |
| -5 | 5 | 2 | 1.32   | 0.57 |
| -5 | 5 | 2 | 0.59   | 0.71 |
| -5 | 5 | 2 | 0.57   | 0.92 |
| -5 | 5 | 2 | 0.43   | 0.66 |
| -5 | 5 | 2 | 1.28   | 0.79 |
| -5 | 5 | 2 | 0.32   | 0.62 |
| -5 | 5 | 2 | 0.89   | 0.83 |
| -5 | 5 | 2 | 1.06   | 0.91 |
| -5 | 5 | 2 | 0.63   | 0.43 |
| -5 | 5 | 2 | 1.09   | 0.73 |
| -5 | 5 | 2 | 2.61   | 0.76 |
| -5 | 5 | 2 | 0.95   | 0.89 |
| -5 | 5 | 3 | 20.46  | 1.65 |
| -5 | 5 | 3 | 22.15  | 1.84 |
| -5 | 5 | 3 | 24.47  | 1.95 |
| -5 | 5 | 3 | 19.34  | 1.51 |
| -5 | 5 | 3 | 26.93  | 2.23 |
| -5 | 5 | 3 | 22.85  | 1.23 |
| -5 | 5 | 3 | 21.14  | 1.94 |
| -5 | 5 | 3 | 28.81  | 2.17 |
| -5 | 5 | 3 | 22.85  | 1.95 |
| -5 | 5 | 3 | 18.31  | 1.37 |
| -5 | 5 | 3 | 21.66  | 1.88 |

## CIF 31

|    |   |   |        |       |
|----|---|---|--------|-------|
| -5 | 5 | 3 | 20.75  | 1.81  |
| -5 | 5 | 3 | 22.53  | 1.55  |
| -5 | 5 | 4 | 6.19   | 1.25  |
| -5 | 5 | 4 | 7.53   | 1.30  |
| -5 | 5 | 4 | 5.08   | 0.91  |
| -5 | 5 | 4 | 5.87   | 0.75  |
| -5 | 5 | 4 | 8.40   | 1.49  |
| -5 | 5 | 4 | 8.04   | 1.33  |
| -5 | 5 | 4 | 7.06   | 1.02  |
| -5 | 5 | 4 | 8.99   | 1.49  |
| -5 | 5 | 4 | 6.89   | 1.19  |
| -5 | 5 | 4 | 8.32   | 1.44  |
| -5 | 5 | 4 | 6.96   | 1.10  |
| -5 | 5 | 4 | 8.35   | 1.44  |
| -5 | 5 | 5 | 739.04 | 12.17 |
| -5 | 5 | 5 | 823.36 | 13.00 |
| -5 | 5 | 5 | 804.54 | 12.86 |
| -5 | 5 | 5 | 860.81 | 11.56 |
| -5 | 5 | 5 | 793.79 | 12.09 |
| -5 | 5 | 5 | 801.47 | 10.02 |
| -5 | 5 | 5 | 905.20 | 13.23 |
| -5 | 5 | 5 | 845.27 | 13.00 |
| -5 | 5 | 5 | 832.00 | 12.74 |
| -5 | 5 | 5 | 754.45 | 12.69 |
| -5 | 5 | 5 | 844.23 | 11.28 |
| -5 | 5 | 5 | 738.69 | 11.62 |
| -5 | 5 | 5 | 844.37 | 10.60 |
| -5 | 5 | 5 | 786.75 | 10.04 |
| -5 | 5 | 5 | 850.52 | 13.35 |
| -5 | 5 | 5 | 803.29 | 13.00 |
| -5 | 5 | 5 | 791.42 | 10.97 |
| -5 | 5 | 6 | 40.92  | 1.92  |
| -5 | 5 | 6 | 34.78  | 1.83  |
| -5 | 5 | 6 | 38.48  | 2.53  |
| -5 | 5 | 6 | 35.27  | 2.20  |
| -5 | 5 | 6 | 32.33  | 2.13  |
| -5 | 5 | 6 | 38.50  | 2.59  |
| -5 | 5 | 6 | 35.56  | 2.17  |
| -5 | 5 | 6 | 34.24  | 2.61  |
| -5 | 5 | 6 | 39.38  | 2.74  |
| -5 | 5 | 6 | 40.41  | 2.23  |

## CIF 31

|    |   |    |        |       |
|----|---|----|--------|-------|
| -5 | 5 | 6  | 34.43  | 2.63  |
| -5 | 5 | 6  | 36.98  | 2.72  |
| -5 | 5 | 6  | 37.58  | 2.69  |
| -5 | 5 | 7  | 261.41 | 7.14  |
| -5 | 5 | 7  | 278.49 | 7.16  |
| -5 | 5 | 7  | 275.10 | 7.17  |
| -5 | 5 | 7  | 274.02 | 7.44  |
| -5 | 5 | 7  | 267.75 | 6.76  |
| -5 | 5 | 7  | 287.24 | 5.66  |
| -5 | 5 | 7  | 275.98 | 6.23  |
| -5 | 5 | 7  | 308.86 | 8.01  |
| -5 | 5 | 7  | 282.46 | 6.74  |
| -5 | 5 | 7  | 307.68 | 6.49  |
| -5 | 5 | 8  | 656.72 | 9.67  |
| -5 | 5 | 8  | 645.39 | 10.38 |
| -5 | 5 | 8  | 609.07 | 11.40 |
| -5 | 5 | 8  | 610.28 | 12.08 |
| -5 | 5 | 8  | 628.85 | 12.20 |
| -5 | 5 | 8  | 596.78 | 11.64 |
| -5 | 5 | 8  | 630.33 | 11.88 |
| -5 | 5 | 8  | 624.00 | 10.22 |
| -5 | 5 | 8  | 601.70 | 10.55 |
| -5 | 5 | 8  | 586.07 | 10.96 |
| -5 | 5 | 8  | 582.83 | 10.87 |
| -5 | 5 | 8  | 629.78 | 12.07 |
| -5 | 5 | 9  | 23.82  | 2.42  |
| -5 | 5 | 9  | 26.88  | 2.63  |
| -5 | 5 | 9  | 20.50  | 2.45  |
| -5 | 5 | 9  | 26.83  | 1.85  |
| -5 | 5 | 9  | 24.23  | 2.11  |
| -5 | 5 | 9  | 24.93  | 1.96  |
| -5 | 5 | 9  | 22.96  | 2.21  |
| -5 | 5 | 9  | 27.87  | 2.09  |
| -5 | 5 | 9  | 25.19  | 2.46  |
| -5 | 5 | 9  | 23.74  | 2.25  |
| -5 | 5 | 9  | 23.24  | 2.22  |
| -5 | 5 | 10 | 55.72  | 3.46  |
| -5 | 5 | 10 | 55.58  | 3.46  |
| -5 | 5 | 10 | 53.20  | 3.40  |
| -5 | 5 | 10 | 58.95  | 2.80  |
| -5 | 5 | 10 | 49.17  | 2.88  |

## CIF 31

|    |   |     |        |       |
|----|---|-----|--------|-------|
| -5 | 5 | 10  | 53.66  | 3.19  |
| -5 | 5 | 10  | 50.19  | 3.21  |
| -5 | 5 | 11  | 528.60 | 9.93  |
| -5 | 5 | 11  | 502.79 | 9.59  |
| -5 | 5 | 11  | 465.78 | 8.01  |
| -5 | 5 | 11  | 491.48 | 9.52  |
| -5 | 5 | 11  | 510.05 | 10.03 |
| -5 | 5 | 11  | 512.40 | 10.14 |
| -5 | 5 | 11  | 537.73 | 9.02  |
| -5 | 5 | 11  | 486.61 | 9.93  |
| -5 | 5 | 12  | 43.03  | 2.44  |
| -5 | 5 | 12  | 45.49  | 2.65  |
| -5 | 5 | 12  | 41.55  | 2.46  |
| -5 | 5 | 12  | 43.17  | 2.63  |
| -5 | 5 | 12  | 44.24  | 2.58  |
| -5 | 5 | 13  | 50.55  | 2.12  |
| -5 | 5 | 13  | 51.36  | 2.24  |
| -5 | 5 | 13  | 47.43  | 2.24  |
| -5 | 5 | 13  | 50.12  | 2.33  |
| -5 | 5 | 13  | 47.60  | 2.23  |
| -5 | 6 | -12 | 68.49  | 2.19  |
| -5 | 6 | -12 | 70.99  | 2.28  |
| -5 | 6 | -11 | 42.10  | 2.21  |
| -5 | 6 | -11 | 36.93  | 3.24  |
| -5 | 6 | -10 | 237.09 | 5.83  |
| -5 | 6 | -10 | 234.57 | 7.35  |
| -5 | 6 | -10 | 240.17 | 5.39  |
| -5 | 6 | -10 | 232.75 | 5.86  |
| -5 | 6 | -10 | 238.26 | 6.72  |
| -5 | 6 | -9  | 309.99 | 6.89  |
| -5 | 6 | -9  | 319.96 | 6.68  |
| -5 | 6 | -9  | 332.11 | 7.65  |
| -5 | 6 | -8  | 57.34  | 3.14  |
| -5 | 6 | -8  | 66.93  | 3.06  |
| -5 | 6 | -8  | 63.64  | 3.08  |
| -5 | 6 | -8  | 64.67  | 2.97  |
| -5 | 6 | -7  | 109.04 | 3.87  |
| -5 | 6 | -7  | 109.65 | 4.16  |
| -5 | 6 | -7  | 118.44 | 4.18  |
| -5 | 6 | -7  | 95.97  | 3.48  |
| -5 | 6 | -7  | 108.00 | 4.30  |

## CIF 31

|    |   |    |        |       |
|----|---|----|--------|-------|
| -5 | 6 | -7 | 115.90 | 3.86  |
| -5 | 6 | -7 | 102.53 | 4.89  |
| -5 | 6 | -6 | 154.31 | 4.46  |
| -5 | 6 | -6 | 133.32 | 5.73  |
| -5 | 6 | -6 | 135.68 | 5.63  |
| -5 | 6 | -6 | 162.57 | 4.85  |
| -5 | 6 | -6 | 171.35 | 4.53  |
| -5 | 6 | -6 | 128.07 | 4.52  |
| -5 | 6 | -6 | 140.17 | 5.90  |
| -5 | 6 | -6 | 160.69 | 4.47  |
| -5 | 6 | -5 | 459.90 | 8.52  |
| -5 | 6 | -5 | 511.15 | 8.17  |
| -5 | 6 | -5 | 474.33 | 10.57 |
| -5 | 6 | -5 | 449.76 | 9.95  |
| -5 | 6 | -5 | 433.84 | 9.36  |
| -5 | 6 | -5 | 478.90 | 11.10 |
| -5 | 6 | -5 | 488.63 | 11.02 |
| -5 | 6 | -5 | 426.90 | 7.79  |
| -5 | 6 | -5 | 505.85 | 8.72  |
| -5 | 6 | -5 | 514.10 | 8.08  |
| -5 | 6 | -5 | 484.14 | 8.63  |
| -5 | 6 | -4 | 1.67   | 1.19  |
| -5 | 6 | -4 | 2.39   | 1.33  |
| -5 | 6 | -4 | 4.07   | 0.88  |
| -5 | 6 | -4 | 2.92   | 0.89  |
| -5 | 6 | -4 | 2.29   | 1.31  |
| -5 | 6 | -4 | 2.60   | 1.13  |
| -5 | 6 | -4 | 2.79   | 1.01  |
| -5 | 6 | -4 | 3.13   | 0.90  |
| -5 | 6 | -4 | 3.06   | 1.30  |
| -5 | 6 | -3 | 580.46 | 10.86 |
| -5 | 6 | -3 | 547.38 | 8.18  |
| -5 | 6 | -3 | 575.45 | 11.12 |
| -5 | 6 | -3 | 566.33 | 10.82 |
| -5 | 6 | -3 | 526.56 | 8.27  |
| -5 | 6 | -3 | 513.40 | 7.88  |
| -5 | 6 | -3 | 543.11 | 9.70  |
| -5 | 6 | -3 | 540.16 | 8.66  |
| -5 | 6 | -3 | 558.27 | 11.21 |
| -5 | 6 | -3 | 570.90 | 10.37 |
| -5 | 6 | -2 | 7.68   | 1.15  |

## CIF 31

|    |   |    |        |       |
|----|---|----|--------|-------|
| -5 | 6 | -2 | 9.00   | 1.56  |
| -5 | 6 | -2 | 7.77   | 1.30  |
| -5 | 6 | -2 | 9.20   | 1.54  |
| -5 | 6 | -2 | 7.80   | 0.89  |
| -5 | 6 | -2 | 9.03   | 1.56  |
| -5 | 6 | -2 | 6.91   | 1.43  |
| -5 | 6 | -2 | 7.96   | 1.01  |
| -5 | 6 | -2 | 7.92   | 1.44  |
| -5 | 6 | -2 | 8.97   | 1.18  |
| -5 | 6 | -1 | 5.64   | 1.31  |
| -5 | 6 | -1 | 7.02   | 1.07  |
| -5 | 6 | -1 | 6.11   | 0.96  |
| -5 | 6 | -1 | 5.91   | 1.25  |
| -5 | 6 | -1 | 6.14   | 1.34  |
| -5 | 6 | -1 | 5.50   | 1.30  |
| -5 | 6 | -1 | 8.56   | 1.25  |
| -5 | 6 | -1 | 7.70   | 1.04  |
| -5 | 6 | -1 | 6.47   | 1.29  |
| -5 | 6 | -1 | 7.29   | 1.12  |
| -5 | 6 | -1 | 6.32   | 1.35  |
| -5 | 6 | -1 | 5.63   | 0.77  |
| -5 | 6 | 0  | 5.58   | 1.21  |
| -5 | 6 | 0  | 3.13   | 1.21  |
| -5 | 6 | 0  | 3.31   | 1.00  |
| -5 | 6 | 0  | 3.33   | 0.65  |
| -5 | 6 | 0  | 3.15   | 1.05  |
| -5 | 6 | 0  | 7.23   | 1.30  |
| -5 | 6 | 0  | 3.46   | 0.94  |
| -5 | 6 | 0  | 4.78   | 1.16  |
| -5 | 6 | 0  | 4.03   | 1.15  |
| -5 | 6 | 0  | 2.94   | 0.77  |
| -5 | 6 | 0  | 2.90   | 1.20  |
| -5 | 6 | 0  | 3.40   | 0.88  |
| -5 | 6 | 0  | 2.65   | 1.01  |
| -5 | 6 | 1  | 685.66 | 9.48  |
| -5 | 6 | 1  | 589.58 | 10.07 |
| -5 | 6 | 1  | 554.06 | 11.06 |
| -5 | 6 | 1  | 661.18 | 10.87 |
| -5 | 6 | 1  | 615.45 | 10.55 |
| -5 | 6 | 1  | 616.72 | 9.71  |
| -5 | 6 | 1  | 645.30 | 10.52 |

## CIF 31

|    |   |   |         |       |
|----|---|---|---------|-------|
| -5 | 6 | 1 | 602.74  | 10.13 |
| -5 | 6 | 1 | 600.05  | 10.45 |
| -5 | 6 | 1 | 631.51  | 10.03 |
| -5 | 6 | 1 | 588.53  | 10.45 |
| -5 | 6 | 1 | 606.11  | 9.20  |
| -5 | 6 | 1 | 585.74  | 9.31  |
| -5 | 6 | 1 | 574.77  | 7.97  |
| -5 | 6 | 2 | 6.15    | 1.16  |
| -5 | 6 | 2 | 5.03    | 0.95  |
| -5 | 6 | 2 | 6.34    | 1.17  |
| -5 | 6 | 2 | 6.35    | 0.80  |
| -5 | 6 | 2 | 4.45    | 1.41  |
| -5 | 6 | 2 | 5.80    | 1.35  |
| -5 | 6 | 2 | 5.93    | 1.37  |
| -5 | 6 | 2 | 6.30    | 1.18  |
| -5 | 6 | 2 | 6.05    | 1.29  |
| -5 | 6 | 2 | 8.22    | 1.12  |
| -5 | 6 | 2 | 4.57    | 1.15  |
| -5 | 6 | 2 | 6.89    | 1.04  |
| -5 | 6 | 2 | 6.99    | 1.43  |
| -5 | 6 | 3 | 260.39  | 6.47  |
| -5 | 6 | 3 | 240.92  | 6.44  |
| -5 | 6 | 3 | 257.09  | 6.35  |
| -5 | 6 | 3 | 257.08  | 6.05  |
| -5 | 6 | 3 | 254.46  | 6.68  |
| -5 | 6 | 3 | 262.39  | 6.74  |
| -5 | 6 | 3 | 253.42  | 5.89  |
| -5 | 6 | 3 | 257.38  | 4.88  |
| -5 | 6 | 3 | 251.85  | 6.56  |
| -5 | 6 | 3 | 253.97  | 5.61  |
| -5 | 6 | 3 | 262.54  | 7.21  |
| -5 | 6 | 3 | 278.55  | 7.15  |
| -5 | 6 | 3 | 256.67  | 6.58  |
| -5 | 6 | 3 | 294.87  | 6.98  |
| -5 | 6 | 3 | 292.58  | 5.85  |
| -5 | 6 | 3 | 267.73  | 5.52  |
| -5 | 6 | 4 | 1160.00 | 16.85 |
| -5 | 6 | 4 | 1263.63 | 17.53 |
| -5 | 6 | 4 | 1212.58 | 16.39 |
| -5 | 6 | 4 | 1200.62 | 16.83 |
| -5 | 6 | 4 | 1090.25 | 16.40 |



## CIF 31

|    |   |   |         |       |
|----|---|---|---------|-------|
| -5 | 6 | 4 | 1250.04 | 15.03 |
| -5 | 6 | 4 | 1242.76 | 17.71 |
| -5 | 6 | 4 | 1196.23 | 13.80 |
| -5 | 6 | 4 | 1238.80 | 16.90 |
| -5 | 6 | 4 | 1208.16 | 15.36 |
| -5 | 6 | 4 | 1157.66 | 16.81 |
| -5 | 6 | 4 | 1190.44 | 14.96 |
| -5 | 6 | 4 | 1221.34 | 16.75 |
| -5 | 6 | 5 | 33.39   | 2.37  |
| -5 | 6 | 5 | 32.90   | 1.83  |
| -5 | 6 | 5 | 32.39   | 2.09  |
| -5 | 6 | 5 | 34.05   | 2.62  |
| -5 | 6 | 5 | 40.00   | 2.86  |
| -5 | 6 | 5 | 39.65   | 2.83  |
| -5 | 6 | 5 | 33.29   | 2.65  |
| -5 | 6 | 5 | 40.36   | 2.94  |
| -5 | 6 | 5 | 39.62   | 2.83  |
| -5 | 6 | 5 | 35.46   | 2.62  |
| -5 | 6 | 5 | 38.43   | 2.94  |
| -5 | 6 | 5 | 38.74   | 2.50  |
| -5 | 6 | 5 | 35.13   | 2.22  |
| -5 | 6 | 5 | 26.81   | 2.58  |
| -5 | 6 | 6 | 530.34  | 10.79 |
| -5 | 6 | 6 | 568.87  | 8.84  |
| -5 | 6 | 6 | 625.20  | 9.80  |
| -5 | 6 | 6 | 671.07  | 12.24 |
| -5 | 6 | 6 | 572.20  | 11.39 |
| -5 | 6 | 6 | 591.75  | 11.01 |
| -5 | 6 | 6 | 583.92  | 11.12 |
| -5 | 6 | 6 | 610.64  | 11.67 |
| -5 | 6 | 6 | 507.82  | 9.81  |
| -5 | 6 | 6 | 588.87  | 10.69 |
| -5 | 6 | 6 | 608.42  | 10.05 |
| -5 | 6 | 6 | 575.03  | 11.45 |
| -5 | 6 | 7 | 338.30  | 8.23  |
| -5 | 6 | 7 | 353.43  | 8.74  |
| -5 | 6 | 7 | 347.99  | 8.43  |
| -5 | 6 | 7 | 337.47  | 8.74  |
| -5 | 6 | 7 | 307.90  | 8.62  |
| -5 | 6 | 7 | 366.20  | 7.26  |
| -5 | 6 | 7 | 366.96  | 6.95  |

## CIF 31

|    |   |    |         |       |
|----|---|----|---------|-------|
| -5 | 6 | 7  | 390.71  | 7.75  |
| -5 | 6 | 7  | 345.19  | 8.09  |
| -5 | 6 | 7  | 347.86  | 7.65  |
| -5 | 6 | 7  | 324.24  | 8.40  |
| -5 | 6 | 7  | 334.12  | 8.76  |
| -5 | 6 | 8  | 1226.25 | 15.26 |
| -5 | 6 | 8  | 1152.14 | 17.22 |
| -5 | 6 | 8  | 1106.76 | 17.44 |
| -5 | 6 | 8  | 1137.60 | 16.55 |
| -5 | 6 | 8  | 1222.45 | 15.44 |
| -5 | 6 | 8  | 1222.33 | 17.96 |
| -5 | 6 | 8  | 1175.61 | 18.43 |
| -5 | 6 | 8  | 1250.36 | 16.98 |
| -5 | 6 | 8  | 1171.03 | 17.68 |
| -5 | 6 | 9  | 377.00  | 9.24  |
| -5 | 6 | 9  | 376.95  | 8.77  |
| -5 | 6 | 9  | 385.35  | 9.38  |
| -5 | 6 | 9  | 399.33  | 8.69  |
| -5 | 6 | 9  | 392.90  | 8.45  |
| -5 | 6 | 9  | 433.97  | 7.66  |
| -5 | 6 | 9  | 394.80  | 7.37  |
| -5 | 6 | 9  | 384.20  | 9.41  |
| -5 | 6 | 9  | 390.19  | 8.49  |
| -5 | 6 | 9  | 410.67  | 9.28  |
| -5 | 6 | 9  | 399.56  | 9.59  |
| -5 | 6 | 9  | 423.57  | 8.38  |
| -5 | 6 | 10 | 357.05  | 8.50  |
| -5 | 6 | 10 | 358.19  | 8.57  |
| -5 | 6 | 10 | 366.02  | 7.94  |
| -5 | 6 | 10 | 369.76  | 8.75  |
| -5 | 6 | 10 | 394.92  | 7.71  |
| -5 | 6 | 10 | 375.51  | 8.61  |
| -5 | 6 | 10 | 334.00  | 7.59  |
| -5 | 6 | 10 | 378.63  | 8.63  |
| -5 | 6 | 11 | 520.37  | 9.63  |
| -5 | 6 | 11 | 497.93  | 9.14  |
| -5 | 6 | 11 | 501.73  | 9.46  |
| -5 | 6 | 12 | 273.98  | 5.71  |
| -5 | 6 | 12 | 264.51  | 5.50  |
| -5 | 6 | 12 | 291.11  | 5.96  |
| -5 | 6 | 12 | 271.03  | 5.65  |

## CIF 31

|    |   |     |        |       |
|----|---|-----|--------|-------|
| -5 | 6 | 12  | 252.40 | 5.47  |
| -5 | 6 | 12  | 231.44 | 5.16  |
| -5 | 6 | 13  | 9.96   | 0.90  |
| -5 | 7 | -12 | 255.67 | 4.10  |
| -5 | 7 | -12 | 204.39 | 4.06  |
| -5 | 7 | -11 | 437.98 | 6.90  |
| -5 | 7 | -11 | 454.23 | 7.47  |
| -5 | 7 | -10 | 258.96 | 5.52  |
| -5 | 7 | -10 | 277.54 | 6.03  |
| -5 | 7 | -10 | 270.62 | 6.54  |
| -5 | 7 | -9  | 436.89 | 8.53  |
| -5 | 7 | -9  | 419.68 | 7.84  |
| -5 | 7 | -9  | 434.38 | 9.01  |
| -5 | 7 | -9  | 422.50 | 8.06  |
| -5 | 7 | -9  | 434.67 | 7.98  |
| -5 | 7 | -8  | 31.96  | 2.25  |
| -5 | 7 | -8  | 25.06  | 2.54  |
| -5 | 7 | -8  | 33.02  | 2.69  |
| -5 | 7 | -8  | 31.67  | 2.31  |
| -5 | 7 | -8  | 33.02  | 3.07  |
| -5 | 7 | -8  | 27.46  | 1.97  |
| -5 | 7 | -8  | 29.91  | 2.07  |
| -5 | 7 | -7  | 476.61 | 7.98  |
| -5 | 7 | -7  | 478.63 | 8.70  |
| -5 | 7 | -7  | 394.71 | 10.05 |
| -5 | 7 | -7  | 481.70 | 8.40  |
| -5 | 7 | -7  | 459.88 | 8.48  |
| -5 | 7 | -7  | 415.49 | 10.77 |
| -5 | 7 | -7  | 501.01 | 8.99  |
| -5 | 7 | -7  | 419.08 | 10.73 |
| -5 | 7 | -7  | 434.68 | 8.86  |
| -5 | 7 | -6  | 21.98  | 1.89  |
| -5 | 7 | -6  | 13.17  | 1.70  |
| -5 | 7 | -6  | 21.70  | 2.72  |
| -5 | 7 | -6  | 20.83  | 2.54  |
| -5 | 7 | -6  | 14.88  | 1.44  |
| -5 | 7 | -6  | 19.73  | 2.25  |
| -5 | 7 | -6  | 22.15  | 2.72  |
| -5 | 7 | -6  | 15.01  | 1.54  |
| -5 | 7 | -6  | 16.25  | 1.66  |
| -5 | 7 | -6  | 13.84  | 1.60  |

## CIF 31

|    |   |    |        |       |
|----|---|----|--------|-------|
| -5 | 7 | -6 | 14.73  | 1.66  |
| -5 | 7 | -5 | 398.36 | 9.59  |
| -5 | 7 | -5 | 441.83 | 7.94  |
| -5 | 7 | -5 | 381.86 | 9.15  |
| -5 | 7 | -5 | 408.96 | 10.58 |
| -5 | 7 | -5 | 445.78 | 8.29  |
| -5 | 7 | -5 | 450.23 | 7.71  |
| -5 | 7 | -5 | 405.35 | 7.82  |
| -5 | 7 | -5 | 450.55 | 8.15  |
| -5 | 7 | -5 | 416.39 | 10.22 |
| -5 | 7 | -5 | 392.92 | 10.28 |
| -5 | 7 | -4 | 235.23 | 7.31  |
| -5 | 7 | -4 | 225.17 | 5.39  |
| -5 | 7 | -4 | 228.48 | 6.87  |
| -5 | 7 | -4 | 205.66 | 6.26  |
| -5 | 7 | -4 | 203.32 | 5.24  |
| -5 | 7 | -4 | 198.06 | 4.89  |
| -5 | 7 | -4 | 232.25 | 6.99  |
| -5 | 7 | -4 | 222.29 | 5.96  |
| -5 | 7 | -3 | 303.53 | 6.13  |
| -5 | 7 | -3 | 297.89 | 8.14  |
| -5 | 7 | -3 | 285.18 | 7.72  |
| -5 | 7 | -3 | 283.60 | 6.01  |
| -5 | 7 | -3 | 277.36 | 7.72  |
| -5 | 7 | -3 | 287.08 | 7.92  |
| -5 | 7 | -3 | 281.52 | 7.39  |
| -5 | 7 | -3 | 280.84 | 6.96  |
| -5 | 7 | -3 | 283.47 | 8.18  |
| -5 | 7 | -2 | 1.70   | 0.66  |
| -5 | 7 | -2 | 3.48   | 1.35  |
| -5 | 7 | -2 | 2.30   | 1.23  |
| -5 | 7 | -2 | 2.75   | 1.23  |
| -5 | 7 | -2 | 1.29   | 0.74  |
| -5 | 7 | -2 | 1.53   | 0.85  |
| -5 | 7 | -2 | 1.82   | 1.04  |
| -5 | 7 | -2 | 1.69   | 0.81  |
| -5 | 7 | -2 | 0.79   | 0.84  |
| -5 | 7 | -2 | 1.36   | 1.17  |
| -5 | 7 | -2 | 1.49   | 0.83  |
| -5 | 7 | -2 | 1.68   | 1.20  |
| -5 | 7 | -1 | 755.53 | 12.90 |

## CIF 31

|    |   |    |         |       |
|----|---|----|---------|-------|
| -5 | 7 | -1 | 745.81  | 12.40 |
| -5 | 7 | -1 | 815.33  | 13.79 |
| -5 | 7 | -1 | 664.45  | 9.55  |
| -5 | 7 | -1 | 680.94  | 12.30 |
| -5 | 7 | -1 | 749.66  | 13.37 |
| -5 | 7 | -1 | 733.60  | 10.00 |
| -5 | 7 | -1 | 822.47  | 11.47 |
| -5 | 7 | -1 | 736.40  | 11.75 |
| -5 | 7 | -1 | 733.83  | 11.52 |
| -5 | 7 | -1 | 812.13  | 13.47 |
| -5 | 7 | -1 | 776.16  | 10.80 |
| -5 | 7 | -1 | 805.21  | 12.40 |
| -5 | 7 | 0  | 262.75  | 6.10  |
| -5 | 7 | 0  | 274.74  | 7.26  |
| -5 | 7 | 0  | 243.28  | 6.76  |
| -5 | 7 | 0  | 241.55  | 6.47  |
| -5 | 7 | 0  | 235.22  | 5.02  |
| -5 | 7 | 0  | 249.06  | 6.68  |
| -5 | 7 | 0  | 255.36  | 6.41  |
| -5 | 7 | 0  | 256.29  | 6.77  |
| -5 | 7 | 0  | 250.03  | 5.79  |
| -5 | 7 | 0  | 282.40  | 6.99  |
| -5 | 7 | 0  | 239.25  | 6.69  |
| -5 | 7 | 1  | 54.54   | 2.69  |
| -5 | 7 | 1  | 55.84   | 3.11  |
| -5 | 7 | 1  | 53.18   | 2.28  |
| -5 | 7 | 1  | 60.48   | 3.26  |
| -5 | 7 | 1  | 55.99   | 3.16  |
| -5 | 7 | 1  | 55.87   | 2.79  |
| -5 | 7 | 1  | 54.53   | 3.24  |
| -5 | 7 | 1  | 59.28   | 3.34  |
| -5 | 7 | 1  | 52.41   | 2.90  |
| -5 | 7 | 1  | 53.71   | 3.15  |
| -5 | 7 | 1  | 56.68   | 2.95  |
| -5 | 7 | 1  | 55.99   | 2.44  |
| -5 | 7 | 1  | 53.86   | 3.09  |
| -5 | 7 | 1  | 55.56   | 2.69  |
| -5 | 7 | 1  | 54.65   | 3.45  |
| -5 | 7 | 2  | 1632.13 | 19.90 |
| -5 | 7 | 2  | 1615.41 | 20.09 |
| -5 | 7 | 2  | 1834.63 | 22.91 |

## CIF 31

|    |   |   |         |       |
|----|---|---|---------|-------|
| -5 | 7 | 2 | 1674.86 | 21.88 |
| -5 | 7 | 2 | 1635.92 | 17.97 |
| -5 | 7 | 2 | 1530.98 | 20.14 |
| -5 | 7 | 2 | 1670.79 | 21.35 |
| -5 | 7 | 2 | 1568.75 | 18.09 |
| -5 | 7 | 2 | 1603.40 | 18.55 |
| -5 | 7 | 2 | 1659.70 | 21.19 |
| -5 | 7 | 2 | 1673.90 | 21.13 |
| -5 | 7 | 2 | 1680.59 | 20.80 |
| -5 | 7 | 2 | 1626.33 | 21.29 |
| -5 | 7 | 2 | 1620.64 | 21.26 |
| -5 | 7 | 2 | 1807.37 | 19.69 |
| -5 | 7 | 3 | 156.37  | 4.33  |
| -5 | 7 | 3 | 164.59  | 4.19  |
| -5 | 7 | 3 | 147.97  | 5.27  |
| -5 | 7 | 3 | 135.83  | 4.66  |
| -5 | 7 | 3 | 143.80  | 5.60  |
| -5 | 7 | 3 | 145.78  | 5.19  |
| -5 | 7 | 3 | 138.39  | 5.36  |
| -5 | 7 | 3 | 129.88  | 3.84  |
| -5 | 7 | 3 | 145.00  | 5.28  |
| -5 | 7 | 3 | 151.99  | 5.39  |
| -5 | 7 | 3 | 169.03  | 4.74  |
| -5 | 7 | 3 | 146.01  | 4.96  |
| -5 | 7 | 3 | 152.44  | 5.20  |
| -5 | 7 | 4 | 117.75  | 4.10  |
| -5 | 7 | 4 | 108.12  | 4.82  |
| -5 | 7 | 4 | 114.20  | 3.72  |
| -5 | 7 | 4 | 107.70  | 4.82  |
| -5 | 7 | 4 | 111.02  | 4.54  |
| -5 | 7 | 4 | 108.61  | 4.57  |
| -5 | 7 | 4 | 97.38   | 4.51  |
| -5 | 7 | 4 | 117.96  | 3.64  |
| -5 | 7 | 4 | 122.03  | 3.70  |
| -5 | 7 | 4 | 120.06  | 4.90  |
| -5 | 7 | 4 | 108.69  | 4.71  |
| -5 | 7 | 4 | 116.87  | 4.64  |
| -5 | 7 | 4 | 111.92  | 4.83  |
| -5 | 7 | 4 | 104.72  | 3.79  |
| -5 | 7 | 5 | 108.76  | 4.76  |
| -5 | 7 | 5 | 100.30  | 3.52  |

## CIF 31

|    |   |   |        |       |
|----|---|---|--------|-------|
| -5 | 7 | 5 | 105.13 | 4.63  |
| -5 | 7 | 5 | 119.60 | 5.14  |
| -5 | 7 | 5 | 105.40 | 4.65  |
| -5 | 7 | 5 | 105.82 | 4.64  |
| -5 | 7 | 5 | 104.00 | 4.33  |
| -5 | 7 | 5 | 99.00  | 3.99  |
| -5 | 7 | 5 | 95.33  | 3.76  |
| -5 | 7 | 5 | 110.50 | 4.98  |
| -5 | 7 | 5 | 107.35 | 3.60  |
| -5 | 7 | 5 | 99.96  | 4.52  |
| -5 | 7 | 5 | 106.65 | 4.74  |
| -5 | 7 | 6 | 192.69 | 6.54  |
| -5 | 7 | 6 | 197.51 | 4.98  |
| -5 | 7 | 6 | 201.66 | 6.53  |
| -5 | 7 | 6 | 190.51 | 5.85  |
| -5 | 7 | 6 | 213.12 | 5.17  |
| -5 | 7 | 6 | 176.12 | 6.45  |
| -5 | 7 | 6 | 181.44 | 5.61  |
| -5 | 7 | 6 | 195.36 | 6.57  |
| -5 | 7 | 6 | 186.65 | 6.28  |
| -5 | 7 | 6 | 203.93 | 6.71  |
| -5 | 7 | 6 | 210.27 | 5.67  |
| -5 | 7 | 6 | 214.79 | 6.58  |
| -5 | 7 | 6 | 195.81 | 6.72  |
| -5 | 7 | 7 | 745.79 | 13.58 |
| -5 | 7 | 7 | 737.92 | 13.66 |
| -5 | 7 | 7 | 687.20 | 13.00 |
| -5 | 7 | 7 | 738.16 | 10.94 |
| -5 | 7 | 7 | 696.93 | 10.44 |
| -5 | 7 | 7 | 707.63 | 12.48 |
| -5 | 7 | 7 | 671.06 | 12.37 |
| -5 | 7 | 7 | 714.69 | 10.16 |
| -5 | 7 | 7 | 787.72 | 12.01 |
| -5 | 7 | 7 | 709.36 | 12.99 |
| -5 | 7 | 7 | 705.33 | 13.15 |
| -5 | 7 | 8 | 24.12  | 2.39  |
| -5 | 7 | 8 | 20.83  | 2.48  |
| -5 | 7 | 8 | 19.82  | 2.02  |
| -5 | 7 | 8 | 18.62  | 2.33  |
| -5 | 7 | 8 | 18.16  | 1.78  |
| -5 | 7 | 8 | 18.97  | 1.61  |

## CIF 31

|    |   |     |         |       |
|----|---|-----|---------|-------|
| -5 | 7 | 8   | 22.60   | 2.29  |
| -5 | 7 | 8   | 19.53   | 2.09  |
| -5 | 7 | 8   | 20.61   | 2.44  |
| -5 | 7 | 8   | 18.22   | 2.06  |
| -5 | 7 | 9   | 1139.80 | 16.70 |
| -5 | 7 | 9   | 1116.33 | 16.96 |
| -5 | 7 | 9   | 1094.49 | 15.35 |
| -5 | 7 | 9   | 1073.73 | 15.28 |
| -5 | 7 | 9   | 1149.95 | 16.36 |
| -5 | 7 | 9   | 1086.89 | 16.00 |
| -5 | 7 | 10  | 384.62  | 8.13  |
| -5 | 7 | 10  | 380.39  | 8.21  |
| -5 | 7 | 10  | 384.93  | 8.28  |
| -5 | 7 | 10  | 371.73  | 7.77  |
| -5 | 7 | 11  | 296.17  | 6.13  |
| -5 | 7 | 11  | 289.00  | 6.20  |
| -5 | 7 | 11  | 294.62  | 6.22  |
| -5 | 7 | 11  | 276.38  | 5.61  |
| -5 | 7 | 12  | 2.69    | 0.67  |
| -5 | 7 | 12  | 1.92    | 0.61  |
| -5 | 7 | 12  | 2.62    | 0.63  |
| -5 | 8 | -12 | 48.21   | 1.40  |
| -5 | 8 | -11 | 2.73    | 0.72  |
| -5 | 8 | -11 | 2.70    | 2.78  |
| -5 | 8 | -11 | 2.19    | 0.75  |
| -5 | 8 | -10 | 387.42  | 7.47  |
| -5 | 8 | -10 | 419.32  | 7.03  |
| -5 | 8 | -10 | 382.96  | 6.77  |
| -5 | 8 | -10 | 425.37  | 7.26  |
| -5 | 8 | -9  | 0.70    | 3.22  |
| -5 | 8 | -9  | 2.21    | 0.96  |
| -5 | 8 | -9  | 0.57    | 0.95  |
| -5 | 8 | -8  | 4.29    | 1.51  |
| -5 | 8 | -8  | 9.39    | 3.88  |
| -5 | 8 | -8  | 4.86    | 1.07  |
| -5 | 8 | -8  | 8.20    | 1.31  |
| -5 | 8 | -8  | 5.06    | 1.27  |
| -5 | 8 | -7  | 9.68    | 1.33  |
| -5 | 8 | -7  | 5.59    | 2.58  |
| -5 | 8 | -7  | 3.51    | 2.00  |
| -5 | 8 | -7  | 7.99    | 1.86  |



## CIF 31

|    |   |    |        |       |
|----|---|----|--------|-------|
| -5 | 8 | -7 | 5.50   | 1.17  |
| -5 | 8 | -7 | 7.02   | 1.87  |
| -5 | 8 | -7 | 8.56   | 1.93  |
| -5 | 8 | -7 | 4.20   | 1.01  |
| -5 | 8 | -7 | 4.08   | 1.15  |
| -5 | 8 | -6 | 64.03  | 4.26  |
| -5 | 8 | -6 | 54.03  | 3.02  |
| -5 | 8 | -6 | 68.71  | 4.21  |
| -5 | 8 | -6 | 60.34  | 3.64  |
| -5 | 8 | -6 | 63.80  | 3.65  |
| -5 | 8 | -6 | 62.10  | 2.79  |
| -5 | 8 | -6 | 58.61  | 3.01  |
| -5 | 8 | -6 | 63.47  | 3.07  |
| -5 | 8 | -6 | 63.68  | 4.35  |
| -5 | 8 | -6 | 53.20  | 2.76  |
| -5 | 8 | -5 | 2.53   | 0.91  |
| -5 | 8 | -5 | 2.10   | 1.70  |
| -5 | 8 | -5 | 2.28   | 1.37  |
| -5 | 8 | -5 | 2.02   | 1.59  |
| -5 | 8 | -5 | 0.58   | 1.01  |
| -5 | 8 | -5 | 1.15   | 0.96  |
| -5 | 8 | -5 | 1.07   | 0.84  |
| -5 | 8 | -5 | 1.47   | 1.08  |
| -5 | 8 | -5 | 2.41   | 1.44  |
| -5 | 8 | -5 | 1.22   | 0.93  |
| -5 | 8 | -4 | 2.50   | 1.60  |
| -5 | 8 | -4 | 2.85   | 1.62  |
| -5 | 8 | -4 | 1.86   | 1.48  |
| -5 | 8 | -4 | 1.41   | 1.00  |
| -5 | 8 | -4 | 1.31   | 1.36  |
| -5 | 8 | -4 | 3.98   | 1.11  |
| -5 | 8 | -4 | 2.40   | 1.02  |
| -5 | 8 | -4 | 2.92   | 1.23  |
| -5 | 8 | -3 | 497.20 | 11.61 |
| -5 | 8 | -3 | 552.41 | 8.83  |
| -5 | 8 | -3 | 544.57 | 11.87 |
| -5 | 8 | -3 | 537.41 | 11.56 |
| -5 | 8 | -3 | 573.20 | 11.81 |
| -5 | 8 | -3 | 532.94 | 10.89 |
| -5 | 8 | -3 | 535.86 | 8.84  |
| -5 | 8 | -3 | 524.31 | 10.16 |

## CIF 31

|    |   |    |        |      |
|----|---|----|--------|------|
| -5 | 8 | -3 | 576.55 | 9.47 |
| -5 | 8 | -2 | 80.05  | 4.10 |
| -5 | 8 | -2 | 77.07  | 2.84 |
| -5 | 8 | -2 | 81.01  | 4.27 |
| -5 | 8 | -2 | 84.42  | 4.48 |
| -5 | 8 | -2 | 82.88  | 3.13 |
| -5 | 8 | -2 | 83.53  | 3.90 |
| -5 | 8 | -2 | 83.90  | 4.44 |
| -5 | 8 | -2 | 74.23  | 3.13 |
| -5 | 8 | -2 | 80.67  | 4.32 |
| -5 | 8 | -2 | 85.65  | 3.84 |
| -5 | 8 | -2 | 79.99  | 3.53 |
| -5 | 8 | -2 | 83.56  | 3.44 |
| -5 | 8 | -1 | 0.74   | 1.37 |
| -5 | 8 | -1 | 1.86   | 1.31 |
| -5 | 8 | -1 | 1.81   | 0.76 |
| -5 | 8 | -1 | 0.66   | 1.03 |
| -5 | 8 | -1 | 2.90   | 1.25 |
| -5 | 8 | -1 | 1.23   | 1.27 |
| -5 | 8 | -1 | 2.44   | 1.27 |
| -5 | 8 | -1 | 1.30   | 1.00 |
| -5 | 8 | -1 | 2.04   | 1.14 |
| -5 | 8 | -1 | 1.73   | 1.02 |
| -5 | 8 | -1 | 3.57   | 1.23 |
| -5 | 8 | 0  | 43.61  | 3.02 |
| -5 | 8 | 0  | 40.42  | 3.01 |
| -5 | 8 | 0  | 41.50  | 2.98 |
| -5 | 8 | 0  | 42.43  | 2.89 |
| -5 | 8 | 0  | 40.22  | 2.84 |
| -5 | 8 | 0  | 40.22  | 2.99 |
| -5 | 8 | 0  | 39.35  | 2.48 |
| -5 | 8 | 0  | 41.98  | 3.08 |
| -5 | 8 | 0  | 44.80  | 2.40 |
| -5 | 8 | 0  | 39.56  | 2.47 |
| -5 | 8 | 0  | 40.79  | 2.68 |
| -5 | 8 | 0  | 40.35  | 2.19 |
| -5 | 8 | 1  | 56.44  | 2.92 |
| -5 | 8 | 1  | 66.22  | 3.78 |
| -5 | 8 | 1  | 70.05  | 3.19 |
| -5 | 8 | 1  | 50.64  | 2.99 |
| -5 | 8 | 1  | 59.72  | 3.45 |

## CIF 31

|    |   |   |         |       |
|----|---|---|---------|-------|
| -5 | 8 | 1 | 56.00   | 3.38  |
| -5 | 8 | 1 | 59.27   | 3.19  |
| -5 | 8 | 1 | 65.11   | 3.49  |
| -5 | 8 | 1 | 65.70   | 3.78  |
| -5 | 8 | 1 | 67.48   | 3.05  |
| -5 | 8 | 1 | 66.53   | 2.79  |
| -5 | 8 | 1 | 59.10   | 3.81  |
| -5 | 8 | 1 | 65.34   | 3.78  |
| -5 | 8 | 1 | 62.42   | 2.70  |
| -5 | 8 | 1 | 56.01   | 3.29  |
| -5 | 8 | 2 | 272.59  | 8.00  |
| -5 | 8 | 2 | 263.09  | 7.58  |
| -5 | 8 | 2 | 282.62  | 7.94  |
| -5 | 8 | 2 | 250.00  | 5.70  |
| -5 | 8 | 2 | 273.93  | 7.63  |
| -5 | 8 | 2 | 291.39  | 7.42  |
| -5 | 8 | 2 | 263.37  | 7.68  |
| -5 | 8 | 2 | 258.41  | 6.62  |
| -5 | 8 | 2 | 277.75  | 6.94  |
| -5 | 8 | 2 | 281.19  | 7.30  |
| -5 | 8 | 2 | 283.36  | 7.73  |
| -5 | 8 | 2 | 254.80  | 5.72  |
| -5 | 8 | 2 | 273.72  | 7.46  |
| -5 | 8 | 2 | 273.63  | 6.55  |
| -5 | 8 | 3 | 1.08    | 0.97  |
| -5 | 8 | 3 | 4.08    | 1.79  |
| -5 | 8 | 3 | 1.68    | 1.31  |
| -5 | 8 | 3 | 3.87    | 1.51  |
| -5 | 8 | 3 | 1.51    | 1.41  |
| -5 | 8 | 3 | 0.25    | 0.72  |
| -5 | 8 | 3 | 0.36    | 1.20  |
| -5 | 8 | 3 | 1.37    | 1.28  |
| -5 | 8 | 3 | -0.05   | 1.10  |
| -5 | 8 | 3 | 0.95    | 1.42  |
| -5 | 8 | 3 | 1.48    | 0.77  |
| -5 | 8 | 3 | 1.68    | 0.95  |
| -5 | 8 | 3 | 1.29    | 0.97  |
| -5 | 8 | 4 | 1575.69 | 18.30 |
| -5 | 8 | 4 | 1540.17 | 20.74 |
| -5 | 8 | 4 | 1541.19 | 21.73 |
| -5 | 8 | 4 | 1563.73 | 21.95 |

## CIF 31

|    |   |   |         |       |
|----|---|---|---------|-------|
| -5 | 8 | 4 | 1589.05 | 20.94 |
| -5 | 8 | 4 | 1513.53 | 21.63 |
| -5 | 8 | 4 | 1489.45 | 17.40 |
| -5 | 8 | 4 | 1543.17 | 17.66 |
| -5 | 8 | 4 | 1456.59 | 21.09 |
| -5 | 8 | 4 | 1402.28 | 20.81 |
| -5 | 8 | 4 | 1601.97 | 21.12 |
| -5 | 8 | 4 | 1498.03 | 21.42 |
| -5 | 8 | 5 | 5.61    | 1.70  |
| -5 | 8 | 5 | 6.89    | 1.58  |
| -5 | 8 | 5 | 6.41    | 1.13  |
| -5 | 8 | 5 | 5.97    | 1.64  |
| -5 | 8 | 5 | 7.70    | 1.73  |
| -5 | 8 | 5 | 6.82    | 1.90  |
| -5 | 8 | 5 | 7.05    | 1.80  |
| -5 | 8 | 5 | 6.36    | 1.00  |
| -5 | 8 | 5 | 5.71    | 1.35  |
| -5 | 8 | 5 | 9.30    | 1.87  |
| -5 | 8 | 5 | 4.86    | 1.75  |
| -5 | 8 | 6 | 1425.50 | 20.42 |
| -5 | 8 | 6 | 1435.62 | 20.01 |
| -5 | 8 | 6 | 1535.94 | 20.59 |
| -5 | 8 | 6 | 1474.99 | 20.33 |
| -5 | 8 | 6 | 1431.92 | 17.10 |
| -5 | 8 | 6 | 1308.11 | 19.51 |
| -5 | 8 | 6 | 1400.39 | 19.78 |
| -5 | 8 | 6 | 1307.09 | 18.11 |
| -5 | 8 | 6 | 1269.21 | 15.50 |
| -5 | 8 | 6 | 1398.36 | 18.25 |
| -5 | 8 | 6 | 1459.31 | 20.65 |
| -5 | 8 | 6 | 1228.41 | 19.40 |
| -5 | 8 | 7 | 1.76    | 1.32  |
| -5 | 8 | 7 | 2.66    | 1.46  |
| -5 | 8 | 7 | 3.45    | 0.88  |
| -5 | 8 | 7 | 1.69    | 1.54  |
| -5 | 8 | 7 | 2.68    | 1.20  |
| -5 | 8 | 7 | 1.09    | 1.00  |
| -5 | 8 | 7 | 3.54    | 1.62  |
| -5 | 8 | 7 | 1.38    | 1.23  |
| -5 | 8 | 7 | 1.19    | 1.31  |
| -5 | 8 | 8 | 115.92  | 4.84  |

## CIF 31

|    |   |     |        |       |
|----|---|-----|--------|-------|
| -5 | 8 | 8   | 91.29  | 3.78  |
| -5 | 8 | 8   | 109.10 | 4.43  |
| -5 | 8 | 8   | 106.79 | 4.13  |
| -5 | 8 | 8   | 106.98 | 4.59  |
| -5 | 8 | 8   | 107.08 | 4.32  |
| -5 | 8 | 8   | 105.30 | 4.28  |
| -5 | 8 | 8   | 93.90  | 4.18  |
| -5 | 8 | 9   | 137.15 | 4.77  |
| -5 | 8 | 9   | 138.30 | 4.81  |
| -5 | 8 | 9   | 125.14 | 4.61  |
| -5 | 8 | 9   | 129.20 | 4.11  |
| -5 | 8 | 9   | 132.46 | 4.48  |
| -5 | 8 | 10  | 24.91  | 1.56  |
| -5 | 8 | 10  | 21.49  | 1.74  |
| -5 | 8 | 10  | 21.12  | 1.72  |
| -5 | 8 | 10  | 23.93  | 1.80  |
| -5 | 8 | 11  | 7.41   | 0.91  |
| -5 | 8 | 11  | 7.17   | 0.84  |
| -5 | 8 | 11  | 7.94   | 0.89  |
| -5 | 9 | -11 | 0.64   | 0.48  |
| -5 | 9 | -11 | 0.72   | 0.53  |
| -5 | 9 | -10 | 32.23  | 1.73  |
| -5 | 9 | -10 | 33.19  | 1.80  |
| -5 | 9 | -9  | 718.30 | 9.85  |
| -5 | 9 | -9  | 715.29 | 10.60 |
| -5 | 9 | -8  | 244.13 | 5.48  |
| -5 | 9 | -8  | 268.19 | 6.52  |
| -5 | 9 | -8  | 226.74 | 6.86  |
| -5 | 9 | -8  | 265.50 | 5.63  |
| -5 | 9 | -8  | 222.71 | 7.23  |
| -5 | 9 | -7  | 35.75  | 3.22  |
| -5 | 9 | -7  | 34.94  | 2.68  |
| -5 | 9 | -7  | 38.93  | 3.16  |
| -5 | 9 | -7  | 37.27  | 2.39  |
| -5 | 9 | -7  | 48.37  | 2.49  |
| -5 | 9 | -7  | 47.22  | 2.46  |
| -5 | 9 | -7  | 39.15  | 3.41  |
| -5 | 9 | -7  | 47.45  | 3.45  |
| -5 | 9 | -6  | 536.34 | 11.13 |
| -5 | 9 | -6  | 538.19 | 9.29  |
| -5 | 9 | -6  | 540.77 | 12.12 |

## CIF 31

|    |   |    |         |       |
|----|---|----|---------|-------|
| -5 | 9 | -6 | 430.46  | 11.31 |
| -5 | 9 | -6 | 608.42  | 9.34  |
| -5 | 9 | -6 | 505.62  | 9.53  |
| -5 | 9 | -6 | 510.42  | 10.76 |
| -5 | 9 | -6 | 592.63  | 9.36  |
| -5 | 9 | -6 | 508.05  | 12.18 |
| -5 | 9 | -5 | 12.90   | 1.79  |
| -5 | 9 | -5 | 6.96    | 2.01  |
| -5 | 9 | -5 | 5.93    | 1.87  |
| -5 | 9 | -5 | 16.80   | 1.51  |
| -5 | 9 | -5 | 7.17    | 1.51  |
| -5 | 9 | -5 | 5.25    | 1.61  |
| -5 | 9 | -5 | 10.30   | 1.44  |
| -5 | 9 | -5 | 11.14   | 1.45  |
| -5 | 9 | -5 | 8.01    | 1.73  |
| -5 | 9 | -4 | 1362.82 | 19.92 |
| -5 | 9 | -4 | 1241.07 | 18.53 |
| -5 | 9 | -4 | 1210.20 | 15.45 |
| -5 | 9 | -4 | 1314.46 | 20.11 |
| -5 | 9 | -4 | 1293.40 | 20.24 |
| -5 | 9 | -4 | 1147.60 | 16.04 |
| -5 | 9 | -4 | 1294.77 | 19.92 |
| -5 | 9 | -4 | 1257.54 | 20.39 |
| -5 | 9 | -4 | 1347.96 | 15.98 |
| -5 | 9 | -3 | 155.54  | 4.26  |
| -5 | 9 | -3 | 199.73  | 7.01  |
| -5 | 9 | -3 | 174.09  | 4.91  |
| -5 | 9 | -3 | 174.41  | 5.70  |
| -5 | 9 | -3 | 192.21  | 7.20  |
| -5 | 9 | -3 | 187.00  | 6.33  |
| -5 | 9 | -3 | 201.14  | 7.07  |
| -5 | 9 | -2 | 587.78  | 11.07 |
| -5 | 9 | -2 | 562.74  | 11.80 |
| -5 | 9 | -2 | 557.90  | 11.89 |
| -5 | 9 | -2 | 546.11  | 10.89 |
| -5 | 9 | -2 | 529.19  | 9.27  |
| -5 | 9 | -2 | 549.81  | 9.57  |
| -5 | 9 | -2 | 582.84  | 12.41 |
| -5 | 9 | -2 | 617.34  | 12.73 |
| -5 | 9 | -2 | 551.45  | 10.19 |
| -5 | 9 | -2 | 596.51  | 12.79 |

## CIF 31

|    |   |    |        |       |
|----|---|----|--------|-------|
| -5 | 9 | -1 | 140.64 | 5.32  |
| -5 | 9 | -1 | 133.15 | 5.57  |
| -5 | 9 | -1 | 141.15 | 4.42  |
| -5 | 9 | -1 | 127.06 | 5.87  |
| -5 | 9 | -1 | 125.06 | 4.53  |
| -5 | 9 | -1 | 133.13 | 5.44  |
| -5 | 9 | -1 | 135.05 | 5.72  |
| -5 | 9 | -1 | 140.42 | 4.36  |
| -5 | 9 | -1 | 130.06 | 5.46  |
| -5 | 9 | -1 | 134.81 | 5.28  |
| -5 | 9 | -1 | 135.74 | 4.99  |
| -5 | 9 | -1 | 138.64 | 4.81  |
| -5 | 9 | 0  | 396.08 | 9.10  |
| -5 | 9 | 0  | 403.55 | 7.76  |
| -5 | 9 | 0  | 391.49 | 9.44  |
| -5 | 9 | 0  | 387.43 | 7.56  |
| -5 | 9 | 0  | 415.21 | 9.71  |
| -5 | 9 | 0  | 384.09 | 9.63  |
| -5 | 9 | 0  | 396.14 | 9.68  |
| -5 | 9 | 0  | 397.22 | 9.06  |
| -5 | 9 | 0  | 418.23 | 8.98  |
| -5 | 9 | 1  | 661.50 | 10.52 |
| -5 | 9 | 1  | 662.53 | 11.61 |
| -5 | 9 | 1  | 716.21 | 13.07 |
| -5 | 9 | 1  | 634.97 | 10.12 |
| -5 | 9 | 1  | 699.76 | 12.80 |
| -5 | 9 | 1  | 697.31 | 14.04 |
| -5 | 9 | 1  | 662.60 | 12.91 |
| -5 | 9 | 1  | 679.09 | 13.05 |
| -5 | 9 | 1  | 631.03 | 12.12 |
| -5 | 9 | 1  | 707.90 | 13.36 |
| -5 | 9 | 2  | 7.44   | 1.98  |
| -5 | 9 | 2  | 4.35   | 1.73  |
| -5 | 9 | 2  | 5.95   | 1.68  |
| -5 | 9 | 2  | 3.39   | 1.50  |
| -5 | 9 | 2  | 6.91   | 1.56  |
| -5 | 9 | 2  | 4.03   | 1.56  |
| -5 | 9 | 2  | 6.32   | 1.50  |
| -5 | 9 | 2  | 3.87   | 0.95  |
| -5 | 9 | 2  | 4.16   | 1.22  |
| -5 | 9 | 2  | 6.17   | 1.38  |

## CIF 31

|    |   |   |        |       |
|----|---|---|--------|-------|
| -5 | 9 | 2 | 4.24   | 1.02  |
| -5 | 9 | 2 | 5.91   | 1.60  |
| -5 | 9 | 2 | 5.87   | 1.83  |
| -5 | 9 | 3 | 704.64 | 12.07 |
| -5 | 9 | 3 | 709.56 | 10.90 |
| -5 | 9 | 3 | 695.82 | 12.04 |
| -5 | 9 | 3 | 717.25 | 13.43 |
| -5 | 9 | 3 | 683.89 | 12.75 |
| -5 | 9 | 3 | 686.72 | 10.27 |
| -5 | 9 | 3 | 682.95 | 13.55 |
| -5 | 9 | 3 | 634.28 | 13.15 |
| -5 | 9 | 3 | 636.14 | 12.71 |
| -5 | 9 | 3 | 668.12 | 12.99 |
| -5 | 9 | 3 | 655.51 | 11.60 |
| -5 | 9 | 4 | 164.05 | 6.27  |
| -5 | 9 | 4 | 142.97 | 4.48  |
| -5 | 9 | 4 | 154.26 | 4.91  |
| -5 | 9 | 4 | 159.74 | 5.77  |
| -5 | 9 | 4 | 169.49 | 6.21  |
| -5 | 9 | 4 | 188.41 | 6.33  |
| -5 | 9 | 4 | 155.82 | 5.96  |
| -5 | 9 | 4 | 157.60 | 6.00  |
| -5 | 9 | 4 | 156.90 | 4.24  |
| -5 | 9 | 4 | 165.26 | 5.59  |
| -5 | 9 | 4 | 176.55 | 5.88  |
| -5 | 9 | 4 | 165.93 | 5.15  |
| -5 | 9 | 4 | 170.37 | 6.26  |
| -5 | 9 | 4 | 166.46 | 6.03  |
| -5 | 9 | 5 | 35.16  | 2.92  |
| -5 | 9 | 5 | 29.78  | 2.50  |
| -5 | 9 | 5 | 27.05  | 2.37  |
| -5 | 9 | 5 | 33.04  | 2.80  |
| -5 | 9 | 5 | 36.59  | 2.81  |
| -5 | 9 | 5 | 36.76  | 2.80  |
| -5 | 9 | 5 | 33.95  | 2.47  |
| -5 | 9 | 5 | 30.96  | 2.83  |
| -5 | 9 | 5 | 41.81  | 2.54  |
| -5 | 9 | 5 | 33.61  | 2.18  |
| -5 | 9 | 5 | 35.13  | 2.95  |
| -5 | 9 | 5 | 37.79  | 2.97  |
| -5 | 9 | 6 | 36.41  | 2.87  |



## CIF 31

|    |    |     |        |      |
|----|----|-----|--------|------|
| -5 | 9  | 6   | 43.50  | 2.36 |
| -5 | 9  | 6   | 41.49  | 2.93 |
| -5 | 9  | 6   | 38.24  | 2.88 |
| -5 | 9  | 6   | 40.90  | 2.99 |
| -5 | 9  | 6   | 34.10  | 2.69 |
| -5 | 9  | 6   | 41.88  | 2.71 |
| -5 | 9  | 6   | 46.51  | 2.59 |
| -5 | 9  | 6   | 37.02  | 2.99 |
| -5 | 9  | 7   | 287.80 | 7.19 |
| -5 | 9  | 7   | 267.37 | 6.51 |
| -5 | 9  | 7   | 290.75 | 7.26 |
| -5 | 9  | 7   | 232.46 | 6.35 |
| -5 | 9  | 7   | 258.65 | 7.04 |
| -5 | 9  | 7   | 263.11 | 7.03 |
| -5 | 9  | 7   | 261.05 | 6.82 |
| -5 | 9  | 7   | 270.93 | 6.91 |
| -5 | 9  | 8   | 64.67  | 2.87 |
| -5 | 9  | 8   | 72.00  | 3.31 |
| -5 | 9  | 8   | 72.52  | 3.09 |
| -5 | 9  | 8   | 72.82  | 3.19 |
| -5 | 9  | 8   | 76.38  | 3.48 |
| -5 | 9  | 8   | 62.47  | 3.10 |
| -5 | 9  | 9   | 72.84  | 2.69 |
| -5 | 9  | 9   | 70.70  | 2.92 |
| -5 | 9  | 9   | 72.57  | 2.83 |
| -5 | 10 | -10 | 84.25  | 2.25 |
| -5 | 10 | -10 | 82.99  | 2.38 |
| -5 | 10 | -9  | 2.54   | 0.95 |
| -5 | 10 | -9  | 8.05   | 1.00 |
| -5 | 10 | -9  | 7.83   | 2.50 |
| -5 | 10 | -9  | 4.67   | 0.80 |
| -5 | 10 | -8  | 2.89   | 1.38 |
| -5 | 10 | -8  | 3.59   | 1.24 |
| -5 | 10 | -8  | 3.73   | 0.93 |
| -5 | 10 | -8  | 3.80   | 2.31 |
| -5 | 10 | -8  | 3.00   | 0.84 |
| -5 | 10 | -7  | 272.08 | 8.16 |
| -5 | 10 | -7  | 260.61 | 7.81 |
| -5 | 10 | -7  | 268.38 | 6.78 |
| -5 | 10 | -7  | 321.11 | 6.09 |
| -5 | 10 | -7  | 293.45 | 5.64 |

## CIF 31

|    |    |    |        |      |
|----|----|----|--------|------|
| -5 | 10 | -7 | 264.68 | 7.61 |
| -5 | 10 | -7 | 303.85 | 6.14 |
| -5 | 10 | -6 | 45.55  | 3.45 |
| -5 | 10 | -6 | 45.80  | 3.10 |
| -5 | 10 | -6 | 44.14  | 3.08 |
| -5 | 10 | -6 | 47.06  | 2.66 |
| -5 | 10 | -6 | 63.53  | 2.74 |
| -5 | 10 | -6 | 54.13  | 2.41 |
| -5 | 10 | -6 | 58.07  | 2.63 |
| -5 | 10 | -5 | 9.92   | 2.16 |
| -5 | 10 | -5 | 14.34  | 1.48 |
| -5 | 10 | -5 | 8.49   | 1.82 |
| -5 | 10 | -5 | 11.06  | 2.19 |
| -5 | 10 | -5 | 12.66  | 2.05 |
| -5 | 10 | -5 | 7.66   | 2.02 |
| -5 | 10 | -5 | 14.18  | 1.44 |
| -5 | 10 | -5 | 10.53  | 1.46 |
| -5 | 10 | -5 | 11.39  | 1.63 |
| -5 | 10 | -5 | 17.71  | 1.51 |
| -5 | 10 | -4 | 23.98  | 2.81 |
| -5 | 10 | -4 | 22.52  | 2.71 |
| -5 | 10 | -4 | 21.93  | 2.61 |
| -5 | 10 | -4 | 15.35  | 1.40 |
| -5 | 10 | -4 | 20.58  | 2.67 |
| -5 | 10 | -4 | 20.56  | 2.22 |
| -5 | 10 | -4 | 20.66  | 2.58 |
| -5 | 10 | -4 | 17.75  | 1.57 |
| -5 | 10 | -3 | 89.79  | 4.86 |
| -5 | 10 | -3 | 86.72  | 3.94 |
| -5 | 10 | -3 | 96.64  | 4.86 |
| -5 | 10 | -3 | 96.66  | 4.01 |
| -5 | 10 | -3 | 92.67  | 4.93 |
| -5 | 10 | -3 | 97.46  | 5.09 |
| -5 | 10 | -3 | 88.37  | 3.52 |
| -5 | 10 | -3 | 85.20  | 3.53 |
| -5 | 10 | -3 | 95.98  | 4.55 |
| -5 | 10 | -2 | 295.63 | 8.25 |
| -5 | 10 | -2 | 297.47 | 8.26 |
| -5 | 10 | -2 | 288.35 | 7.59 |
| -5 | 10 | -2 | 293.45 | 6.63 |
| -5 | 10 | -2 | 294.58 | 8.97 |

## CIF 31

|    |    |    |        |      |
|----|----|----|--------|------|
| -5 | 10 | -2 | 283.73 | 7.62 |
| -5 | 10 | -2 | 304.68 | 6.79 |
| -5 | 10 | -2 | 266.92 | 8.30 |
| -5 | 10 | -2 | 292.58 | 6.96 |
| -5 | 10 | -1 | 15.07  | 2.28 |
| -5 | 10 | -1 | 16.82  | 1.66 |
| -5 | 10 | -1 | 14.61  | 2.12 |
| -5 | 10 | -1 | 12.81  | 1.92 |
| -5 | 10 | -1 | 15.26  | 2.09 |
| -5 | 10 | -1 | 17.68  | 2.01 |
| -5 | 10 | -1 | 17.92  | 2.16 |
| -5 | 10 | -1 | 14.01  | 2.14 |
| -5 | 10 | -1 | 16.74  | 1.64 |
| -5 | 10 | 0  | 125.99 | 4.93 |
| -5 | 10 | 0  | 117.52 | 4.36 |
| -5 | 10 | 0  | 129.64 | 5.84 |
| -5 | 10 | 0  | 110.89 | 3.99 |
| -5 | 10 | 0  | 111.51 | 4.77 |
| -5 | 10 | 0  | 104.00 | 4.82 |
| -5 | 10 | 0  | 132.81 | 5.49 |
| -5 | 10 | 0  | 111.24 | 3.89 |
| -5 | 10 | 0  | 116.18 | 5.16 |
| -5 | 10 | 0  | 108.63 | 4.50 |
| -5 | 10 | 0  | 113.28 | 4.55 |
| -5 | 10 | 0  | 128.71 | 5.42 |
| -5 | 10 | 1  | 12.41  | 2.33 |
| -5 | 10 | 1  | 12.83  | 1.46 |
| -5 | 10 | 1  | 11.64  | 1.75 |
| -5 | 10 | 1  | 14.19  | 1.70 |
| -5 | 10 | 1  | 13.84  | 2.18 |
| -5 | 10 | 1  | 9.45   | 1.86 |
| -5 | 10 | 1  | 12.85  | 1.99 |
| -5 | 10 | 1  | 12.39  | 1.39 |
| -5 | 10 | 1  | 14.23  | 1.67 |
| -5 | 10 | 1  | 12.22  | 1.85 |
| -5 | 10 | 1  | 13.77  | 2.03 |
| -5 | 10 | 2  | 2.49   | 1.53 |
| -5 | 10 | 2  | 3.06   | 1.46 |
| -5 | 10 | 2  | 4.00   | 1.70 |
| -5 | 10 | 2  | 3.11   | 1.50 |
| -5 | 10 | 2  | 2.75   | 1.15 |

## CIF 31

|    |    |   |        |      |
|----|----|---|--------|------|
| -5 | 10 | 2 | 2.79   | 1.52 |
| -5 | 10 | 2 | 2.58   | 1.16 |
| -5 | 10 | 2 | 1.72   | 1.27 |
| -5 | 10 | 2 | 3.02   | 1.32 |
| -5 | 10 | 2 | 2.39   | 0.79 |
| -5 | 10 | 2 | 2.94   | 0.92 |
| -5 | 10 | 2 | 3.23   | 1.06 |
| -5 | 10 | 3 | 5.37   | 1.69 |
| -5 | 10 | 3 | 5.39   | 1.74 |
| -5 | 10 | 3 | 3.62   | 0.94 |
| -5 | 10 | 3 | 5.82   | 1.47 |
| -5 | 10 | 3 | 4.51   | 1.27 |
| -5 | 10 | 3 | 6.00   | 1.20 |
| -5 | 10 | 3 | 4.23   | 1.40 |
| -5 | 10 | 3 | 5.01   | 1.25 |
| -5 | 10 | 3 | 5.19   | 1.51 |
| -5 | 10 | 3 | 4.37   | 1.58 |
| -5 | 10 | 4 | 1.26   | 0.98 |
| -5 | 10 | 4 | 0.41   | 1.04 |
| -5 | 10 | 4 | 1.00   | 1.10 |
| -5 | 10 | 4 | 0.76   | 1.09 |
| -5 | 10 | 4 | 1.47   | 1.24 |
| -5 | 10 | 4 | 1.70   | 1.43 |
| -5 | 10 | 4 | 1.03   | 1.44 |
| -5 | 10 | 4 | 0.64   | 0.99 |
| -5 | 10 | 4 | 0.68   | 1.17 |
| -5 | 10 | 4 | 1.19   | 0.81 |
| -5 | 10 | 5 | 111.19 | 4.47 |
| -5 | 10 | 5 | 108.51 | 4.15 |
| -5 | 10 | 5 | 105.73 | 4.09 |
| -5 | 10 | 5 | 115.87 | 4.85 |
| -5 | 10 | 5 | 94.24  | 3.86 |
| -5 | 10 | 5 | 97.79  | 4.30 |
| -5 | 10 | 5 | 113.23 | 4.57 |
| -5 | 10 | 6 | 45.99  | 2.84 |
| -5 | 10 | 6 | 43.94  | 2.74 |
| -5 | 10 | 6 | 44.62  | 2.65 |
| -5 | 10 | 6 | 41.09  | 2.60 |
| -5 | 10 | 6 | 50.16  | 2.79 |
| -5 | 10 | 6 | 42.09  | 2.18 |
| -5 | 10 | 6 | 46.27  | 2.86 |

## CIF 31

|    |    |    |        |       |
|----|----|----|--------|-------|
| -5 | 10 | 7  | 80.37  | 3.31  |
| -5 | 10 | 7  | 81.81  | 3.13  |
| -5 | 10 | 7  | 71.68  | 2.98  |
| -5 | 10 | 7  | 81.45  | 3.15  |
| -5 | 10 | 7  | 72.29  | 2.57  |
| -5 | 10 | 7  | 84.17  | 3.25  |
| -5 | 10 | 8  | 48.68  | 1.99  |
| -5 | 10 | 8  | 55.17  | 2.23  |
| -5 | 11 | -9 | 0.59   | 0.54  |
| -5 | 11 | -8 | 254.76 | 6.14  |
| -5 | 11 | -8 | 316.85 | 5.22  |
| -5 | 11 | -7 | 27.65  | 1.39  |
| -5 | 11 | -7 | 32.08  | 2.51  |
| -5 | 11 | -7 | 33.23  | 1.75  |
| -5 | 11 | -7 | 31.90  | 2.73  |
| -5 | 11 | -6 | 257.29 | 4.67  |
| -5 | 11 | -6 | 260.60 | 6.69  |
| -5 | 11 | -6 | 247.52 | 6.62  |
| -5 | 11 | -6 | 266.60 | 7.43  |
| -5 | 11 | -6 | 256.31 | 7.40  |
| -5 | 11 | -5 | 9.01   | 1.19  |
| -5 | 11 | -5 | 5.60   | 1.72  |
| -5 | 11 | -5 | 4.94   | 1.58  |
| -5 | 11 | -5 | 4.68   | 1.52  |
| -5 | 11 | -5 | 5.50   | 1.54  |
| -5 | 11 | -5 | 5.89   | 1.58  |
| -5 | 11 | -5 | 7.29   | 0.94  |
| -5 | 11 | -4 | 842.28 | 14.64 |
| -5 | 11 | -4 | 885.65 | 14.73 |
| -5 | 11 | -4 | 835.37 | 14.89 |
| -5 | 11 | -4 | 856.42 | 15.07 |
| -5 | 11 | -4 | 780.22 | 11.95 |
| -5 | 11 | -4 | 813.36 | 13.53 |
| -5 | 11 | -4 | 901.24 | 10.74 |
| -5 | 11 | -3 | 1.40   | 0.99  |
| -5 | 11 | -3 | 0.68   | 0.76  |
| -5 | 11 | -3 | 0.19   | 1.23  |
| -5 | 11 | -3 | 0.25   | 1.40  |
| -5 | 11 | -3 | 0.38   | 1.44  |
| -5 | 11 | -3 | 0.75   | 1.65  |
| -5 | 11 | -3 | 1.15   | 1.08  |

## CIF 31

|    |    |    |        |      |
|----|----|----|--------|------|
| -5 | 11 | -3 | 0.95   | 0.66 |
| -5 | 11 | -3 | 0.66   | 1.20 |
| -5 | 11 | -2 | 10.00  | 1.59 |
| -5 | 11 | -2 | 11.36  | 2.03 |
| -5 | 11 | -2 | 8.07   | 1.17 |
| -5 | 11 | -2 | 13.55  | 2.34 |
| -5 | 11 | -2 | 8.15   | 1.23 |
| -5 | 11 | -2 | 10.04  | 1.77 |
| -5 | 11 | -2 | 11.45  | 1.88 |
| -5 | 11 | -2 | 11.81  | 1.72 |
| -5 | 11 | -1 | 256.43 | 7.11 |
| -5 | 11 | -1 | 279.71 | 7.91 |
| -5 | 11 | -1 | 260.54 | 6.00 |
| -5 | 11 | -1 | 256.62 | 7.03 |
| -5 | 11 | -1 | 261.64 | 7.08 |
| -5 | 11 | -1 | 238.66 | 5.70 |
| -5 | 11 | -1 | 252.76 | 6.74 |
| -5 | 11 | -1 | 264.14 | 7.62 |
| -5 | 11 | -1 | 270.35 | 6.55 |
| -5 | 11 | 0  | 10.01  | 1.87 |
| -5 | 11 | 0  | 11.40  | 1.80 |
| -5 | 11 | 0  | 9.49   | 1.68 |
| -5 | 11 | 0  | 10.04  | 2.05 |
| -5 | 11 | 0  | 10.27  | 1.79 |
| -5 | 11 | 0  | 11.30  | 1.65 |
| -5 | 11 | 1  | 13.22  | 1.82 |
| -5 | 11 | 1  | 12.93  | 2.12 |
| -5 | 11 | 1  | 11.47  | 1.96 |
| -5 | 11 | 1  | 12.10  | 1.84 |
| -5 | 11 | 1  | 12.15  | 1.73 |
| -5 | 11 | 1  | 12.85  | 1.90 |
| -5 | 11 | 1  | 14.96  | 1.70 |
| -5 | 11 | 2  | 30.07  | 2.18 |
| -5 | 11 | 2  | 35.54  | 2.85 |
| -5 | 11 | 2  | 33.19  | 2.81 |
| -5 | 11 | 2  | 31.87  | 2.62 |
| -5 | 11 | 2  | 31.78  | 2.59 |
| -5 | 11 | 2  | 33.12  | 2.60 |
| -5 | 11 | 2  | 33.46  | 2.43 |
| -5 | 11 | 3  | 16.95  | 1.93 |
| -5 | 11 | 3  | 16.87  | 1.66 |

## CIF 31

|    |    |    |        |      |
|----|----|----|--------|------|
| -5 | 11 | 3  | 18.55  | 2.00 |
| -5 | 11 | 3  | 18.83  | 2.07 |
| -5 | 11 | 3  | 17.74  | 1.90 |
| -5 | 11 | 3  | 17.76  | 1.88 |
| -5 | 11 | 4  | 52.57  | 2.49 |
| -5 | 11 | 4  | 53.98  | 2.70 |
| -5 | 11 | 4  | 53.23  | 3.00 |
| -5 | 11 | 4  | 57.58  | 3.21 |
| -5 | 11 | 4  | 57.51  | 3.09 |
| -5 | 11 | 4  | 51.81  | 2.85 |
| -5 | 11 | 5  | 111.24 | 3.63 |
| -5 | 11 | 5  | 112.11 | 3.98 |
| -5 | 11 | 6  | 189.03 | 4.35 |
| -5 | 11 | 6  | 213.09 | 4.63 |
| -5 | 12 | -8 | 18.12  | 0.94 |
| -5 | 12 | -8 | 8.97   | 0.97 |
| -5 | 12 | -7 | 4.27   | 1.04 |
| -5 | 12 | -7 | 2.68   | 0.65 |
| -5 | 12 | -6 | 4.10   | 0.74 |
| -5 | 12 | -6 | 1.97   | 0.91 |
| -5 | 12 | -6 | 1.16   | 0.85 |
| -5 | 12 | -6 | 1.85   | 1.07 |
| -5 | 12 | -6 | 1.06   | 1.04 |
| -5 | 12 | -6 | 0.88   | 1.01 |
| -5 | 12 | -5 | 339.03 | 7.85 |
| -5 | 12 | -5 | 327.39 | 7.52 |
| -5 | 12 | -5 | 358.92 | 7.49 |
| -5 | 12 | -5 | 372.32 | 5.80 |
| -5 | 12 | -5 | 363.25 | 8.14 |
| -5 | 12 | -5 | 340.64 | 7.55 |
| -5 | 12 | -4 | 69.76  | 3.51 |
| -5 | 12 | -4 | 80.74  | 3.91 |
| -5 | 12 | -4 | 78.48  | 3.63 |
| -5 | 12 | -4 | 71.74  | 3.42 |
| -5 | 12 | -3 | 7.03   | 1.62 |
| -5 | 12 | -3 | 6.92   | 1.31 |
| -5 | 12 | -3 | 7.38   | 1.40 |
| -5 | 12 | -3 | 8.11   | 1.56 |
| -5 | 12 | -3 | 6.90   | 1.63 |
| -5 | 12 | -3 | 5.83   | 1.23 |
| -5 | 12 | -2 | 162.89 | 5.43 |

## CIF 31

|    |    |    |        |      |
|----|----|----|--------|------|
| -5 | 12 | -2 | 151.78 | 5.54 |
| -5 | 12 | -2 | 150.00 | 4.48 |
| -5 | 12 | -2 | 154.85 | 5.28 |
| -5 | 12 | -2 | 127.52 | 4.13 |
| -5 | 12 | -2 | 154.32 | 5.07 |
| -5 | 12 | -2 | 135.35 | 4.42 |
| -5 | 12 | -1 | 35.84  | 2.54 |
| -5 | 12 | -1 | 36.77  | 2.54 |
| -5 | 12 | -1 | 37.36  | 2.32 |
| -5 | 12 | -1 | 33.94  | 2.38 |
| -5 | 12 | -1 | 30.98  | 2.72 |
| -5 | 12 | 0  | 11.64  | 1.54 |
| -5 | 12 | 0  | 11.77  | 1.75 |
| -5 | 12 | 0  | 11.94  | 1.79 |
| -5 | 12 | 0  | 10.03  | 1.60 |
| -5 | 12 | 0  | 11.10  | 1.54 |
| -5 | 12 | 0  | 11.14  | 1.46 |
| -5 | 12 | 0  | 11.27  | 1.36 |
| -5 | 12 | 1  | 4.97   | 1.37 |
| -5 | 12 | 1  | 4.18   | 1.32 |
| -5 | 12 | 1  | 3.70   | 0.94 |
| -5 | 12 | 1  | 5.08   | 1.26 |
| -5 | 12 | 1  | 3.13   | 1.04 |
| -5 | 12 | 1  | 2.56   | 1.03 |
| -5 | 12 | 1  | 3.15   | 1.01 |
| -5 | 12 | 2  | 25.00  | 1.89 |
| -5 | 12 | 2  | 21.23  | 1.84 |
| -5 | 12 | 2  | 20.70  | 1.93 |
| -5 | 12 | 2  | 24.13  | 1.79 |
| -5 | 12 | 3  | 36.79  | 1.84 |
| -5 | 12 | 3  | 45.85  | 2.30 |
| -5 | 12 | 4  | 24.48  | 1.67 |
| -5 | 12 | 4  | 26.69  | 1.64 |
| -5 | 13 | -5 | 31.24  | 1.87 |
| -5 | 13 | -5 | 25.78  | 1.59 |
| -5 | 13 | -5 | 31.80  | 1.09 |
| -5 | 13 | -5 | 27.46  | 1.51 |
| -5 | 13 | -4 | 188.25 | 4.33 |
| -5 | 13 | -4 | 155.28 | 4.24 |
| -5 | 13 | -4 | 174.61 | 4.48 |
| -5 | 13 | -4 | 136.02 | 2.54 |



## CIF 31

|    |     |    |        |      |
|----|-----|----|--------|------|
| -5 | 13  | -3 | 21.89  | 1.83 |
| -5 | 13  | -3 | 22.98  | 1.73 |
| -5 | 13  | -3 | 23.50  | 1.75 |
| -5 | 13  | -2 | 2.23   | 0.86 |
| -5 | 13  | -2 | 2.14   | 0.94 |
| -5 | 13  | -1 | 5.70   | 0.88 |
| -5 | 13  | -1 | 7.49   | 1.24 |
| -5 | 13  | -1 | 5.90   | 0.89 |
| -5 | 13  | -1 | 6.85   | 1.16 |
| -5 | 13  | 0  | 24.63  | 1.71 |
| -5 | 13  | 0  | 26.08  | 1.57 |
| -5 | 13  | 1  | 2.77   | 0.73 |
| -5 | 13  | 1  | 2.42   | 0.62 |
| -4 | -10 | 2  | 7.95   | 0.67 |
| -4 | -10 | 2  | 8.82   | 0.70 |
| -4 | -10 | 3  | 156.39 | 2.90 |
| -4 | -10 | 3  | 184.22 | 3.26 |
| -4 | -10 | 4  | 118.83 | 2.44 |
| -4 | -10 | 5  | 35.87  | 1.23 |
| -4 | -10 | 5  | 43.54  | 1.61 |
| -4 | -10 | 6  | 145.25 | 3.56 |
| -4 | -10 | 6  | 186.53 | 3.34 |
| -4 | -10 | 7  | 0.13   | 0.40 |
| -4 | -10 | 7  | 1.08   | 0.58 |
| -4 | -10 | 8  | 23.51  | 1.27 |
| -4 | -10 | 8  | 23.63  | 0.92 |
| -4 | -10 | 9  | 52.72  | 1.79 |
| -4 | -9  | -1 | 20.96  | 0.99 |
| -4 | -9  | 0  | 6.19   | 0.86 |
| -4 | -9  | 0  | 6.76   | 0.80 |
| -4 | -9  | 1  | 54.36  | 2.10 |
| -4 | -9  | 1  | 54.36  | 2.14 |
| -4 | -9  | 2  | 20.50  | 1.45 |
| -4 | -9  | 2  | 18.22  | 1.24 |
| -4 | -9  | 2  | 19.70  | 1.42 |
| -4 | -9  | 3  | 192.39 | 4.25 |
| -4 | -9  | 3  | 190.25 | 5.26 |
| -4 | -9  | 3  | 204.59 | 4.26 |
| -4 | -9  | 4  | 236.72 | 4.74 |
| -4 | -9  | 4  | 252.68 | 4.96 |
| -4 | -9  | 5  | 311.36 | 5.47 |

## CIF 31

|    |    |    |        |      |
|----|----|----|--------|------|
| -4 | -9 | 5  | 311.70 | 6.84 |
| -4 | -9 | 5  | 318.36 | 6.88 |
| -4 | -9 | 6  | 18.61  | 1.25 |
| -4 | -9 | 6  | 24.33  | 2.02 |
| -4 | -9 | 6  | 25.50  | 2.03 |
| -4 | -9 | 6  | 21.70  | 1.62 |
| -4 | -9 | 6  | 23.17  | 1.57 |
| -4 | -9 | 7  | 99.68  | 2.97 |
| -4 | -9 | 7  | 98.66  | 3.65 |
| -4 | -9 | 7  | 93.50  | 3.51 |
| -4 | -9 | 7  | 94.78  | 3.14 |
| -4 | -9 | 8  | 45.63  | 2.48 |
| -4 | -9 | 8  | 47.47  | 2.49 |
| -4 | -9 | 8  | 45.41  | 2.36 |
| -4 | -9 | 8  | 51.67  | 2.24 |
| -4 | -9 | 9  | 65.65  | 2.73 |
| -4 | -9 | 9  | 65.44  | 2.72 |
| -4 | -9 | 9  | 58.46  | 2.27 |
| -4 | -9 | 9  | 59.08  | 2.48 |
| -4 | -9 | 10 | 40.80  | 1.80 |
| -4 | -9 | 10 | 40.09  | 1.74 |
| -4 | -9 | 10 | 43.35  | 2.03 |
| -4 | -9 | 11 | 41.25  | 1.66 |
| -4 | -9 | 11 | 43.43  | 1.86 |
| -4 | -8 | -3 | 138.42 | 3.08 |
| -4 | -8 | -2 | 41.35  | 1.46 |
| -4 | -8 | -2 | 44.46  | 1.79 |
| -4 | -8 | -1 | 45.10  | 1.61 |
| -4 | -8 | -1 | 57.30  | 2.25 |
| -4 | -8 | 0  | 329.41 | 6.38 |
| -4 | -8 | 0  | 346.69 | 6.26 |
| -4 | -8 | 1  | 21.45  | 1.73 |
| -4 | -8 | 1  | 21.74  | 1.51 |
| -4 | -8 | 1  | 21.91  | 1.69 |
| -4 | -8 | 2  | 30.65  | 2.06 |
| -4 | -8 | 2  | 34.01  | 1.95 |
| -4 | -8 | 3  | 179.59 | 4.68 |
| -4 | -8 | 3  | 190.29 | 5.90 |
| -4 | -8 | 3  | 176.76 | 5.65 |
| -4 | -8 | 3  | 167.66 | 5.69 |
| -4 | -8 | 3  | 191.37 | 4.72 |

## CIF 31

|    |    |    |        |      |
|----|----|----|--------|------|
| -4 | -8 | 4  | 13.92  | 1.49 |
| -4 | -8 | 4  | 16.44  | 1.59 |
| -4 | -8 | 4  | 12.67  | 1.90 |
| -4 | -8 | 4  | 13.29  | 1.81 |
| -4 | -8 | 4  | 11.13  | 1.85 |
| -4 | -8 | 4  | 10.87  | 1.29 |
| -4 | -8 | 4  | 11.64  | 1.46 |
| -4 | -8 | 5  | 91.33  | 3.35 |
| -4 | -8 | 5  | 103.36 | 4.32 |
| -4 | -8 | 5  | 85.65  | 3.98 |
| -4 | -8 | 5  | 98.72  | 3.69 |
| -4 | -8 | 5  | 102.37 | 4.36 |
| -4 | -8 | 6  | 1.17   | 0.88 |
| -4 | -8 | 6  | 0.34   | 0.84 |
| -4 | -8 | 6  | 1.01   | 1.27 |
| -4 | -8 | 6  | 2.20   | 1.22 |
| -4 | -8 | 6  | 0.86   | 0.75 |
| -4 | -8 | 6  | 1.73   | 0.81 |
| -4 | -8 | 7  | 6.70   | 1.50 |
| -4 | -8 | 7  | 8.95   | 1.24 |
| -4 | -8 | 7  | 7.45   | 1.20 |
| -4 | -8 | 7  | 6.22   | 1.06 |
| -4 | -8 | 7  | 11.04  | 1.33 |
| -4 | -8 | 8  | 55.54  | 2.78 |
| -4 | -8 | 8  | 56.99  | 3.07 |
| -4 | -8 | 8  | 54.01  | 2.95 |
| -4 | -8 | 8  | 56.22  | 2.56 |
| -4 | -8 | 8  | 59.30  | 2.75 |
| -4 | -8 | 9  | 77.73  | 2.94 |
| -4 | -8 | 9  | 86.88  | 3.61 |
| -4 | -8 | 9  | 86.02  | 3.25 |
| -4 | -8 | 9  | 77.51  | 2.59 |
| -4 | -8 | 9  | 83.16  | 3.20 |
| -4 | -8 | 9  | 84.76  | 3.51 |
| -4 | -8 | 10 | 6.90   | 1.21 |
| -4 | -8 | 10 | 6.27   | 0.96 |
| -4 | -8 | 10 | 7.71   | 1.11 |
| -4 | -8 | 10 | 7.36   | 1.23 |
| -4 | -8 | 11 | 44.55  | 2.13 |
| -4 | -8 | 11 | 45.48  | 2.14 |
| -4 | -8 | 11 | 47.91  | 2.31 |

## CIF 31

|    |    |    |         |       |
|----|----|----|---------|-------|
| -4 | -8 | 12 | 23.51   | 1.63  |
| -4 | -8 | 12 | 21.34   | 1.32  |
| -4 | -8 | 12 | 19.94   | 1.31  |
| -4 | -8 | 13 | 1.35    | 0.60  |
| -4 | -7 | -5 | 34.13   | 1.41  |
| -4 | -7 | -5 | 32.20   | 1.38  |
| -4 | -7 | -4 | 4.00    | 0.88  |
| -4 | -7 | -4 | 2.43    | 0.58  |
| -4 | -7 | -4 | 2.58    | 0.74  |
| -4 | -7 | -3 | 179.82  | 4.39  |
| -4 | -7 | -3 | 171.65  | 3.94  |
| -4 | -7 | -3 | 165.99  | 3.82  |
| -4 | -7 | -2 | 2.95    | 1.08  |
| -4 | -7 | -2 | 2.77    | 0.69  |
| -4 | -7 | -2 | 2.65    | 0.88  |
| -4 | -7 | -2 | 2.12    | 0.81  |
| -4 | -7 | -1 | 74.05   | 2.68  |
| -4 | -7 | -1 | 77.04   | 3.04  |
| -4 | -7 | 0  | 62.00   | 2.89  |
| -4 | -7 | 0  | 54.51   | 3.37  |
| -4 | -7 | 0  | 58.05   | 2.45  |
| -4 | -7 | 0  | 55.74   | 2.31  |
| -4 | -7 | 0  | 60.23   | 2.82  |
| -4 | -7 | 1  | 136.73  | 4.34  |
| -4 | -7 | 1  | 135.20  | 4.01  |
| -4 | -7 | 2  | 1101.63 | 16.96 |
| -4 | -7 | 2  | 1298.36 | 15.71 |
| -4 | -7 | 2  | 1266.30 | 15.32 |
| -4 | -7 | 2  | 1074.52 | 14.66 |
| -4 | -7 | 3  | 49.36   | 2.56  |
| -4 | -7 | 3  | 55.67   | 3.43  |
| -4 | -7 | 3  | 49.89   | 2.59  |
| -4 | -7 | 3  | 54.94   | 2.88  |
| -4 | -7 | 4  | 703.49  | 12.59 |
| -4 | -7 | 4  | 675.50  | 12.57 |
| -4 | -7 | 4  | 700.69  | 11.24 |
| -4 | -7 | 4  | 708.20  | 10.82 |
| -4 | -7 | 4  | 712.92  | 10.52 |
| -4 | -7 | 5  | 0.30    | 0.90  |
| -4 | -7 | 5  | 1.18    | 1.37  |
| -4 | -7 | 5  | 1.38    | 1.26  |

## CIF 31

|    |    |    |       |      |
|----|----|----|-------|------|
| -4 | -7 | 5  | 0.27  | 1.27 |
| -4 | -7 | 5  | 0.26  | 0.80 |
| -4 | -7 | 5  | 0.28  | 1.15 |
| -4 | -7 | 5  | 0.72  | 0.83 |
| -4 | -7 | 6  | 6.07  | 1.63 |
| -4 | -7 | 6  | 8.46  | 1.36 |
| -4 | -7 | 6  | 6.85  | 1.18 |
| -4 | -7 | 6  | 5.70  | 1.48 |
| -4 | -7 | 6  | 6.25  | 1.35 |
| -4 | -7 | 6  | 8.05  | 1.63 |
| -4 | -7 | 6  | 5.66  | 1.25 |
| -4 | -7 | 6  | 9.69  | 1.33 |
| -4 | -7 | 6  | 5.09  | 1.23 |
| -4 | -7 | 7  | 82.51 | 4.00 |
| -4 | -7 | 7  | 88.05 | 4.14 |
| -4 | -7 | 7  | 92.06 | 4.07 |
| -4 | -7 | 7  | 92.13 | 3.37 |
| -4 | -7 | 7  | 90.39 | 3.66 |
| -4 | -7 | 7  | 85.01 | 3.83 |
| -4 | -7 | 7  | 79.34 | 3.36 |
| -4 | -7 | 7  | 76.32 | 3.38 |
| -4 | -7 | 8  | 21.74 | 1.86 |
| -4 | -7 | 8  | 20.70 | 2.10 |
| -4 | -7 | 8  | 20.25 | 1.94 |
| -4 | -7 | 8  | 20.64 | 1.60 |
| -4 | -7 | 8  | 18.84 | 2.04 |
| -4 | -7 | 8  | 21.19 | 1.94 |
| -4 | -7 | 8  | 17.75 | 1.86 |
| -4 | -7 | 8  | 20.62 | 1.92 |
| -4 | -7 | 9  | 28.28 | 2.43 |
| -4 | -7 | 9  | 29.50 | 2.23 |
| -4 | -7 | 9  | 26.43 | 1.68 |
| -4 | -7 | 9  | 31.08 | 2.35 |
| -4 | -7 | 9  | 29.94 | 2.21 |
| -4 | -7 | 9  | 27.79 | 2.02 |
| -4 | -7 | 9  | 27.75 | 2.06 |
| -4 | -7 | 10 | 3.67  | 0.98 |
| -4 | -7 | 10 | 4.27  | 1.27 |
| -4 | -7 | 10 | 4.61  | 1.19 |
| -4 | -7 | 10 | 4.64  | 1.27 |
| -4 | -7 | 10 | 3.26  | 1.04 |

## CIF 31

|    |    |    |        |      |
|----|----|----|--------|------|
| -4 | -7 | 10 | 3.60   | 1.02 |
| -4 | -7 | 11 | 135.90 | 4.07 |
| -4 | -7 | 11 | 144.03 | 4.40 |
| -4 | -7 | 11 | 130.36 | 3.91 |
| -4 | -7 | 11 | 140.05 | 4.33 |
| -4 | -7 | 11 | 130.82 | 3.65 |
| -4 | -7 | 12 | 63.48  | 2.69 |
| -4 | -7 | 12 | 68.92  | 2.59 |
| -4 | -7 | 12 | 73.98  | 2.79 |
| -4 | -7 | 12 | 77.94  | 2.93 |
| -4 | -7 | 13 | 333.03 | 5.50 |
| -4 | -7 | 13 | 318.47 | 5.33 |
| -4 | -7 | 14 | 7.30   | 0.89 |
| -4 | -6 | -7 | 105.61 | 2.08 |
| -4 | -6 | -6 | 61.08  | 1.98 |
| -4 | -6 | -6 | 61.41  | 2.15 |
| -4 | -6 | -6 | 60.13  | 2.04 |
| -4 | -6 | -5 | 5.47   | 0.99 |
| -4 | -6 | -5 | 2.55   | 0.56 |
| -4 | -6 | -5 | 4.98   | 0.89 |
| -4 | -6 | -5 | 5.02   | 0.99 |
| -4 | -6 | -4 | 10.54  | 1.31 |
| -4 | -6 | -4 | 12.46  | 1.45 |
| -4 | -6 | -4 | 9.92   | 1.14 |
| -4 | -6 | -4 | 11.42  | 1.17 |
| -4 | -6 | -3 | 38.82  | 2.34 |
| -4 | -6 | -3 | 39.76  | 2.24 |
| -4 | -6 | -3 | 38.67  | 2.13 |
| -4 | -6 | -3 | 34.85  | 1.99 |
| -4 | -6 | -2 | 174.31 | 4.99 |
| -4 | -6 | -2 | 173.26 | 5.09 |
| -4 | -6 | -2 | 182.11 | 4.55 |
| -4 | -6 | -2 | 191.08 | 4.93 |
| -4 | -6 | -2 | 199.38 | 4.97 |
| -4 | -6 | -1 | 277.63 | 6.07 |
| -4 | -6 | -1 | 289.09 | 5.82 |
| -4 | -6 | -1 | 308.12 | 5.85 |
| -4 | -6 | -1 | 307.23 | 6.51 |
| -4 | -6 | -1 | 269.42 | 6.74 |
| -4 | -6 | 0  | 14.68  | 1.31 |
| -4 | -6 | 0  | 11.64  | 1.91 |

## CIF 31

|    |    |   |        |       |
|----|----|---|--------|-------|
| -4 | -6 | 0 | 13.01  | 1.35  |
| -4 | -6 | 0 | 11.18  | 1.89  |
| -4 | -6 | 0 | 14.67  | 1.72  |
| -4 | -6 | 0 | 13.73  | 1.65  |
| -4 | -6 | 0 | 17.52  | 1.52  |
| -4 | -6 | 1 | 21.56  | 1.55  |
| -4 | -6 | 1 | 23.46  | 1.93  |
| -4 | -6 | 1 | 25.58  | 2.53  |
| -4 | -6 | 1 | 18.70  | 1.39  |
| -4 | -6 | 1 | 27.29  | 2.61  |
| -4 | -6 | 1 | 25.14  | 2.45  |
| -4 | -6 | 1 | 24.07  | 1.84  |
| -4 | -6 | 1 | 20.14  | 1.65  |
| -4 | -6 | 1 | 23.56  | 2.06  |
| -4 | -6 | 2 | 11.07  | 1.50  |
| -4 | -6 | 2 | 12.00  | 1.40  |
| -4 | -6 | 2 | 10.02  | 1.73  |
| -4 | -6 | 2 | 8.68   | 1.36  |
| -4 | -6 | 2 | 11.24  | 1.85  |
| -4 | -6 | 2 | 9.52   | 1.24  |
| -4 | -6 | 2 | 9.95   | 1.19  |
| -4 | -6 | 2 | 11.13  | 1.83  |
| -4 | -6 | 3 | 0.82   | 0.81  |
| -4 | -6 | 3 | 2.84   | 1.44  |
| -4 | -6 | 3 | 1.59   | 1.33  |
| -4 | -6 | 3 | 1.69   | 1.29  |
| -4 | -6 | 3 | 1.54   | 0.80  |
| -4 | -6 | 3 | 0.92   | 0.84  |
| -4 | -6 | 3 | 1.52   | 1.31  |
| -4 | -6 | 3 | 1.81   | 0.81  |
| -4 | -6 | 4 | 485.20 | 8.89  |
| -4 | -6 | 4 | 484.39 | 10.02 |
| -4 | -6 | 4 | 499.39 | 8.78  |
| -4 | -6 | 4 | 494.92 | 10.38 |
| -4 | -6 | 4 | 497.03 | 10.16 |
| -4 | -6 | 4 | 503.95 | 8.60  |
| -4 | -6 | 4 | 494.18 | 9.94  |
| -4 | -6 | 5 | 729.75 | 12.28 |
| -4 | -6 | 5 | 707.81 | 12.75 |
| -4 | -6 | 5 | 631.37 | 11.75 |
| -4 | -6 | 5 | 700.87 | 12.44 |

## CIF 31

|    |    |   |         |       |
|----|----|---|---------|-------|
| -4 | -6 | 5 | 774.98  | 11.06 |
| -4 | -6 | 5 | 691.39  | 10.77 |
| -4 | -6 | 5 | 711.06  | 11.21 |
| -4 | -6 | 5 | 726.54  | 11.25 |
| -4 | -6 | 6 | 1035.71 | 15.59 |
| -4 | -6 | 6 | 990.83  | 14.88 |
| -4 | -6 | 6 | 950.81  | 15.00 |
| -4 | -6 | 6 | 944.67  | 13.26 |
| -4 | -6 | 6 | 997.75  | 13.13 |
| -4 | -6 | 6 | 958.06  | 13.68 |
| -4 | -6 | 6 | 925.98  | 14.42 |
| -4 | -6 | 6 | 935.25  | 14.68 |
| -4 | -6 | 6 | 893.49  | 13.67 |
| -4 | -6 | 6 | 998.33  | 14.45 |
| -4 | -6 | 7 | 172.15  | 5.85  |
| -4 | -6 | 7 | 195.55  | 4.69  |
| -4 | -6 | 7 | 182.68  | 5.11  |
| -4 | -6 | 7 | 192.12  | 5.74  |
| -4 | -6 | 7 | 213.98  | 5.16  |
| -4 | -6 | 7 | 192.16  | 5.35  |
| -4 | -6 | 7 | 185.46  | 5.57  |
| -4 | -6 | 7 | 178.91  | 5.92  |
| -4 | -6 | 7 | 188.83  | 5.88  |
| -4 | -6 | 7 | 179.26  | 5.68  |
| -4 | -6 | 7 | 200.40  | 5.60  |
| -4 | -6 | 7 | 198.36  | 5.67  |
| -4 | -6 | 8 | 2.39    | 1.26  |
| -4 | -6 | 8 | 2.60    | 1.05  |
| -4 | -6 | 8 | 2.11    | 1.23  |
| -4 | -6 | 8 | 0.87    | 0.77  |
| -4 | -6 | 8 | 4.65    | 1.28  |
| -4 | -6 | 8 | 4.33    | 1.11  |
| -4 | -6 | 8 | 1.82    | 1.27  |
| -4 | -6 | 8 | 0.74    | 0.77  |
| -4 | -6 | 8 | 3.11    | 1.19  |
| -4 | -6 | 8 | 0.91    | 1.13  |
| -4 | -6 | 8 | 0.64    | 1.01  |
| -4 | -6 | 9 | 644.68  | 10.61 |
| -4 | -6 | 9 | 688.20  | 10.54 |
| -4 | -6 | 9 | 670.23  | 11.77 |
| -4 | -6 | 9 | 659.60  | 10.11 |



## CIF 31

|    |    |    |        |       |
|----|----|----|--------|-------|
| -4 | -6 | 9  | 670.48 | 10.95 |
| -4 | -6 | 9  | 635.94 | 11.11 |
| -4 | -6 | 9  | 711.16 | 12.11 |
| -4 | -6 | 9  | 686.08 | 11.88 |
| -4 | -6 | 9  | 631.11 | 9.30  |
| -4 | -6 | 9  | 623.16 | 11.27 |
| -4 | -6 | 9  | 692.73 | 11.48 |
| -4 | -6 | 10 | 3.77   | 1.27  |
| -4 | -6 | 10 | 2.13   | 1.23  |
| -4 | -6 | 10 | 2.57   | 1.05  |
| -4 | -6 | 10 | 3.52   | 1.10  |
| -4 | -6 | 10 | 3.27   | 1.08  |
| -4 | -6 | 10 | 4.25   | 1.39  |
| -4 | -6 | 10 | 4.13   | 1.25  |
| -4 | -6 | 10 | 3.81   | 1.01  |
| -4 | -6 | 10 | 3.02   | 0.86  |
| -4 | -6 | 10 | 4.32   | 1.10  |
| -4 | -6 | 11 | 3.06   | 0.92  |
| -4 | -6 | 11 | 3.76   | 0.98  |
| -4 | -6 | 11 | 4.02   | 1.26  |
| -4 | -6 | 11 | 4.48   | 1.07  |
| -4 | -6 | 11 | 3.03   | 1.00  |
| -4 | -6 | 11 | 5.12   | 1.28  |
| -4 | -6 | 11 | 5.02   | 1.16  |
| -4 | -6 | 11 | 4.44   | 1.12  |
| -4 | -6 | 11 | 4.93   | 1.31  |
| -4 | -6 | 12 | 27.85  | 2.00  |
| -4 | -6 | 12 | 30.85  | 2.17  |
| -4 | -6 | 12 | 33.48  | 2.06  |
| -4 | -6 | 12 | 32.76  | 2.24  |
| -4 | -6 | 12 | 30.49  | 2.18  |
| -4 | -6 | 12 | 28.00  | 1.91  |
| -4 | -6 | 12 | 27.16  | 1.94  |
| -4 | -6 | 12 | 29.62  | 2.03  |
| -4 | -6 | 13 | 22.12  | 1.61  |
| -4 | -6 | 13 | 21.60  | 1.67  |
| -4 | -6 | 13 | 18.75  | 1.45  |
| -4 | -6 | 13 | 19.21  | 1.57  |
| -4 | -6 | 14 | 97.85  | 2.78  |
| -4 | -6 | 14 | 96.48  | 2.68  |
| -4 | -5 | -8 | 94.01  | 2.24  |

## CIF 31

|    |    |    |         |       |
|----|----|----|---------|-------|
| -4 | -5 | -8 | 90.83   | 2.19  |
| -4 | -5 | -7 | 32.92   | 1.70  |
| -4 | -5 | -7 | 36.79   | 1.73  |
| -4 | -5 | -7 | 33.29   | 1.63  |
| -4 | -5 | -6 | 4.84    | 0.99  |
| -4 | -5 | -6 | 5.31    | 0.94  |
| -4 | -5 | -6 | 4.66    | 1.16  |
| -4 | -5 | -6 | 4.78    | 0.82  |
| -4 | -5 | -5 | 6.82    | 1.24  |
| -4 | -5 | -5 | 5.16    | 1.24  |
| -4 | -5 | -5 | 4.78    | 1.09  |
| -4 | -5 | -5 | 5.11    | 0.96  |
| -4 | -5 | -5 | 5.13    | 1.21  |
| -4 | -5 | -4 | 108.32  | 4.15  |
| -4 | -5 | -4 | 112.34  | 3.62  |
| -4 | -5 | -4 | 107.75  | 3.88  |
| -4 | -5 | -4 | 112.88  | 3.94  |
| -4 | -5 | -4 | 107.43  | 3.64  |
| -4 | -5 | -3 | 351.20  | 7.35  |
| -4 | -5 | -3 | 329.37  | 7.19  |
| -4 | -5 | -3 | 343.23  | 7.49  |
| -4 | -5 | -3 | 352.97  | 6.94  |
| -4 | -5 | -3 | 355.26  | 7.19  |
| -4 | -5 | -3 | 339.24  | 6.90  |
| -4 | -5 | -2 | 265.33  | 6.17  |
| -4 | -5 | -2 | 270.27  | 5.91  |
| -4 | -5 | -2 | 266.82  | 6.05  |
| -4 | -5 | -2 | 272.06  | 6.57  |
| -4 | -5 | -1 | 1149.30 | 15.70 |
| -4 | -5 | -1 | 1113.65 | 15.13 |
| -4 | -5 | -1 | 1171.78 | 14.85 |
| -4 | -5 | -1 | 1189.05 | 14.57 |
| -4 | -5 | -1 | 1210.95 | 14.23 |
| -4 | -5 | -1 | 1050.26 | 16.82 |
| -4 | -5 | -1 | 1284.12 | 15.43 |
| -4 | -5 | 0  | 266.88  | 5.62  |
| -4 | -5 | 0  | 292.93  | 5.89  |
| -4 | -5 | 0  | 286.45  | 5.91  |
| -4 | -5 | 0  | 281.25  | 6.66  |
| -4 | -5 | 0  | 295.11  | 7.44  |
| -4 | -5 | 0  | 268.60  | 5.87  |

## CIF 31

|    |    |   |         |       |
|----|----|---|---------|-------|
| -4 | -5 | 0 | 277.96  | 7.48  |
| -4 | -5 | 0 | 305.26  | 6.55  |
| -4 | -5 | 0 | 320.95  | 7.89  |
| -4 | -5 | 1 | 0.67    | 0.68  |
| -4 | -5 | 1 | 1.14    | 0.69  |
| -4 | -5 | 1 | 2.39    | 0.76  |
| -4 | -5 | 1 | 2.04    | 1.08  |
| -4 | -5 | 1 | 2.13    | 1.27  |
| -4 | -5 | 1 | 1.25    | 0.89  |
| -4 | -5 | 1 | 3.03    | 1.27  |
| -4 | -5 | 1 | 1.49    | 0.71  |
| -4 | -5 | 1 | 1.46    | 0.85  |
| -4 | -5 | 1 | 1.31    | 1.14  |
| -4 | -5 | 2 | 1144.67 | 15.83 |
| -4 | -5 | 2 | 1056.23 | 16.42 |
| -4 | -5 | 2 | 1177.43 | 16.29 |
| -4 | -5 | 2 | 1088.61 | 13.56 |
| -4 | -5 | 2 | 985.43  | 12.23 |
| -4 | -5 | 2 | 1002.06 | 15.32 |
| -4 | -5 | 2 | 1036.03 | 16.05 |
| -4 | -5 | 2 | 1032.97 | 13.27 |
| -4 | -5 | 2 | 1059.54 | 13.92 |
| -4 | -5 | 2 | 1089.08 | 13.49 |
| -4 | -5 | 3 | 156.15  | 5.22  |
| -4 | -5 | 3 | 155.91  | 4.44  |
| -4 | -5 | 3 | 155.36  | 5.17  |
| -4 | -5 | 3 | 164.79  | 4.88  |
| -4 | -5 | 3 | 165.00  | 5.67  |
| -4 | -5 | 3 | 178.59  | 4.57  |
| -4 | -5 | 3 | 143.01  | 4.06  |
| -4 | -5 | 3 | 158.76  | 5.43  |
| -4 | -5 | 3 | 176.20  | 4.59  |
| -4 | -5 | 4 | 31.40   | 2.58  |
| -4 | -5 | 4 | 33.57   | 2.48  |
| -4 | -5 | 4 | 30.54   | 2.50  |
| -4 | -5 | 4 | 35.03   | 2.01  |
| -4 | -5 | 4 | 34.08   | 2.10  |
| -4 | -5 | 4 | 38.26   | 2.23  |
| -4 | -5 | 5 | 8.00    | 1.15  |
| -4 | -5 | 5 | 7.16    | 1.54  |
| -4 | -5 | 5 | 12.28   | 1.14  |

## CIF 31

|    |    |   |         |       |
|----|----|---|---------|-------|
| -4 | -5 | 5 | 9.44    | 1.30  |
| -4 | -5 | 5 | 14.67   | 1.39  |
| -4 | -5 | 5 | 10.74   | 1.44  |
| -4 | -5 | 5 | 7.56    | 1.44  |
| -4 | -5 | 5 | 10.29   | 1.48  |
| -4 | -5 | 6 | 970.46  | 12.33 |
| -4 | -5 | 6 | 962.40  | 14.72 |
| -4 | -5 | 6 | 957.92  | 11.87 |
| -4 | -5 | 6 | 913.21  | 12.39 |
| -4 | -5 | 6 | 918.17  | 12.74 |
| -4 | -5 | 6 | 946.95  | 13.11 |
| -4 | -5 | 6 | 1021.62 | 14.27 |
| -4 | -5 | 6 | 922.07  | 14.11 |
| -4 | -5 | 6 | 986.14  | 13.73 |
| -4 | -5 | 6 | 926.40  | 13.80 |
| -4 | -5 | 7 | 84.80   | 3.32  |
| -4 | -5 | 7 | 75.78   | 3.68  |
| -4 | -5 | 7 | 91.62   | 3.88  |
| -4 | -5 | 7 | 83.87   | 3.67  |
| -4 | -5 | 7 | 91.43   | 3.78  |
| -4 | -5 | 7 | 88.39   | 3.14  |
| -4 | -5 | 7 | 91.94   | 3.19  |
| -4 | -5 | 7 | 85.53   | 3.45  |
| -4 | -5 | 7 | 86.92   | 3.99  |
| -4 | -5 | 7 | 91.81   | 3.32  |
| -4 | -5 | 7 | 79.28   | 3.52  |
| -4 | -5 | 7 | 89.17   | 3.91  |
| -4 | -5 | 7 | 85.27   | 3.86  |
| -4 | -5 | 7 | 85.91   | 3.61  |
| -4 | -5 | 8 | 7.71    | 1.52  |
| -4 | -5 | 8 | 6.56    | 1.23  |
| -4 | -5 | 8 | 8.45    | 1.62  |
| -4 | -5 | 8 | 7.56    | 1.29  |
| -4 | -5 | 8 | 5.83    | 0.99  |
| -4 | -5 | 8 | 7.26    | 1.39  |
| -4 | -5 | 8 | 7.78    | 1.36  |
| -4 | -5 | 8 | 6.09    | 1.43  |
| -4 | -5 | 8 | 10.73   | 1.42  |
| -4 | -5 | 8 | 9.78    | 1.58  |
| -4 | -5 | 8 | 6.41    | 1.44  |
| -4 | -5 | 8 | 4.79    | 1.02  |

## CIF 31

|    |    |    |        |      |
|----|----|----|--------|------|
| -4 | -5 | 8  | 5.60   | 1.40 |
| -4 | -5 | 8  | 6.90   | 1.22 |
| -4 | -5 | 9  | 38.36  | 2.45 |
| -4 | -5 | 9  | 37.00  | 2.59 |
| -4 | -5 | 9  | 37.79  | 2.65 |
| -4 | -5 | 9  | 44.70  | 2.88 |
| -4 | -5 | 9  | 39.53  | 1.98 |
| -4 | -5 | 9  | 45.93  | 2.62 |
| -4 | -5 | 9  | 37.74  | 2.72 |
| -4 | -5 | 9  | 41.19  | 2.41 |
| -4 | -5 | 9  | 37.98  | 2.41 |
| -4 | -5 | 9  | 41.43  | 2.91 |
| -4 | -5 | 9  | 34.52  | 2.40 |
| -4 | -5 | 9  | 38.12  | 2.74 |
| -4 | -5 | 9  | 36.39  | 2.62 |
| -4 | -5 | 10 | 124.60 | 4.49 |
| -4 | -5 | 10 | 127.10 | 4.38 |
| -4 | -5 | 10 | 120.98 | 4.17 |
| -4 | -5 | 10 | 110.54 | 3.93 |
| -4 | -5 | 10 | 130.55 | 4.79 |
| -4 | -5 | 10 | 125.76 | 4.71 |
| -4 | -5 | 10 | 124.87 | 4.32 |
| -4 | -5 | 10 | 126.21 | 4.72 |
| -4 | -5 | 10 | 116.19 | 4.50 |
| -4 | -5 | 10 | 119.72 | 4.55 |
| -4 | -5 | 10 | 118.24 | 4.35 |
| -4 | -5 | 10 | 139.68 | 4.98 |
| -4 | -5 | 10 | 117.08 | 4.36 |
| -4 | -5 | 11 | 16.88  | 1.68 |
| -4 | -5 | 11 | 19.35  | 2.06 |
| -4 | -5 | 11 | 20.78  | 2.12 |
| -4 | -5 | 11 | 17.53  | 1.84 |
| -4 | -5 | 11 | 16.01  | 1.98 |
| -4 | -5 | 11 | 19.57  | 1.82 |
| -4 | -5 | 11 | 17.21  | 1.81 |
| -4 | -5 | 11 | 22.31  | 2.08 |
| -4 | -5 | 11 | 17.59  | 1.89 |
| -4 | -5 | 11 | 17.96  | 1.74 |
| -4 | -5 | 11 | 18.77  | 1.81 |
| -4 | -5 | 11 | 20.02  | 2.09 |
| -4 | -5 | 11 | 19.09  | 1.85 |

## CIF 31

|    |    |    |        |      |
|----|----|----|--------|------|
| -4 | -5 | 12 | 178.50 | 5.07 |
| -4 | -5 | 12 | 161.56 | 4.80 |
| -4 | -5 | 12 | 168.89 | 4.99 |
| -4 | -5 | 12 | 173.03 | 5.39 |
| -4 | -5 | 12 | 193.22 | 5.53 |
| -4 | -5 | 12 | 174.98 | 4.96 |
| -4 | -5 | 12 | 170.58 | 5.19 |
| -4 | -5 | 12 | 171.28 | 5.27 |
| -4 | -5 | 12 | 178.71 | 5.07 |
| -4 | -5 | 12 | 183.42 | 5.45 |
| -4 | -5 | 12 | 178.40 | 5.23 |
| -4 | -5 | 12 | 171.03 | 4.90 |
| -4 | -5 | 13 | 162.86 | 4.49 |
| -4 | -5 | 13 | 182.13 | 4.82 |
| -4 | -5 | 13 | 182.36 | 4.99 |
| -4 | -5 | 13 | 177.54 | 4.98 |
| -4 | -5 | 13 | 177.34 | 4.90 |
| -4 | -5 | 13 | 156.21 | 4.54 |
| -4 | -5 | 13 | 167.45 | 4.62 |
| -4 | -5 | 13 | 180.47 | 4.93 |
| -4 | -5 | 13 | 140.66 | 4.60 |
| -4 | -5 | 14 | 4.93   | 1.03 |
| -4 | -5 | 14 | 4.44   | 0.91 |
| -4 | -5 | 14 | 4.29   | 0.93 |
| -4 | -5 | 14 | 5.23   | 1.02 |
| -4 | -5 | 14 | 4.80   | 0.98 |
| -4 | -5 | 15 | 0.77   | 0.55 |
| -4 | -5 | 15 | 0.51   | 0.52 |
| -4 | -5 | 15 | 0.37   | 0.47 |
| -4 | -4 | -9 | 128.98 | 3.31 |
| -4 | -4 | -9 | 152.98 | 2.98 |
| -4 | -4 | -8 | 7.37   | 0.91 |
| -4 | -4 | -8 | 8.85   | 1.06 |
| -4 | -4 | -8 | 9.11   | 1.10 |
| -4 | -4 | -7 | 27.22  | 1.76 |
| -4 | -4 | -7 | 24.44  | 1.56 |
| -4 | -4 | -7 | 27.84  | 2.20 |
| -4 | -4 | -7 | 30.68  | 1.96 |
| -4 | -4 | -6 | 91.85  | 3.40 |
| -4 | -4 | -6 | 87.07  | 2.95 |
| -4 | -4 | -6 | 87.66  | 3.24 |

## CIF 31

|    |    |    |         |       |
|----|----|----|---------|-------|
| -4 | -4 | -6 | 89.71   | 3.51  |
| -4 | -4 | -6 | 95.24   | 4.15  |
| -4 | -4 | -5 | 86.12   | 3.51  |
| -4 | -4 | -5 | 81.47   | 4.01  |
| -4 | -4 | -5 | 87.08   | 3.42  |
| -4 | -4 | -5 | 82.50   | 3.12  |
| -4 | -4 | -4 | 5.67    | 1.29  |
| -4 | -4 | -4 | 6.76    | 1.28  |
| -4 | -4 | -4 | 6.82    | 1.12  |
| -4 | -4 | -4 | 6.64    | 1.18  |
| -4 | -4 | -4 | 5.58    | 1.33  |
| -4 | -4 | -4 | 6.49    | 1.16  |
| -4 | -4 | -4 | 2.21    | 1.23  |
| -4 | -4 | -3 | 775.73  | 11.69 |
| -4 | -4 | -3 | 767.68  | 11.52 |
| -4 | -4 | -3 | 758.14  | 11.20 |
| -4 | -4 | -3 | 753.92  | 11.54 |
| -4 | -4 | -3 | 743.58  | 11.10 |
| -4 | -4 | -2 | 753.85  | 11.11 |
| -4 | -4 | -2 | 756.12  | 10.91 |
| -4 | -4 | -2 | 719.77  | 12.63 |
| -4 | -4 | -2 | 780.78  | 11.10 |
| -4 | -4 | -2 | 697.64  | 11.48 |
| -4 | -4 | -2 | 766.13  | 11.50 |
| -4 | -4 | -1 | 38.78   | 2.25  |
| -4 | -4 | -1 | 37.36   | 2.65  |
| -4 | -4 | -1 | 38.17   | 2.14  |
| -4 | -4 | -1 | 35.64   | 2.04  |
| -4 | -4 | -1 | 39.84   | 1.96  |
| -4 | -4 | -1 | 32.30   | 2.13  |
| -4 | -4 | -1 | 35.93   | 2.63  |
| -4 | -4 | 0  | 1270.57 | 14.97 |
| -4 | -4 | 0  | 1115.25 | 17.01 |
| -4 | -4 | 0  | 1131.07 | 13.95 |
| -4 | -4 | 0  | 1256.21 | 16.81 |
| -4 | -4 | 0  | 1239.52 | 16.75 |
| -4 | -4 | 0  | 1231.35 | 14.20 |
| -4 | -4 | 0  | 1215.23 | 16.21 |
| -4 | -4 | 0  | 1217.41 | 17.41 |
| -4 | -4 | 0  | 1151.06 | 13.96 |
| -4 | -4 | 0  | 1170.65 | 15.23 |

## CIF 31

|    |    |   |         |       |
|----|----|---|---------|-------|
| -4 | -4 | 0 | 1178.67 | 14.24 |
| -4 | -4 | 1 | 1483.70 | 18.87 |
| -4 | -4 | 1 | 1380.26 | 19.34 |
| -4 | -4 | 1 | 1530.84 | 19.20 |
| -4 | -4 | 1 | 1559.65 | 20.11 |
| -4 | -4 | 1 | 1483.55 | 18.66 |
| -4 | -4 | 1 | 1416.56 | 16.19 |
| -4 | -4 | 1 | 1548.31 | 16.81 |
| -4 | -4 | 1 | 1508.05 | 17.05 |
| -4 | -4 | 1 | 1503.06 | 16.39 |
| -4 | -4 | 1 | 1483.83 | 16.70 |
| -4 | -4 | 1 | 1559.06 | 18.01 |
| -4 | -4 | 1 | 1477.87 | 16.40 |
| -4 | -4 | 1 | 1598.19 | 19.30 |
| -4 | -4 | 2 | 8.83    | 1.35  |
| -4 | -4 | 2 | 7.76    | 1.49  |
| -4 | -4 | 2 | 12.31   | 1.54  |
| -4 | -4 | 2 | 5.69    | 0.90  |
| -4 | -4 | 2 | 8.54    | 1.33  |
| -4 | -4 | 2 | 9.79    | 1.02  |
| -4 | -4 | 2 | 6.37    | 0.85  |
| -4 | -4 | 2 | 6.92    | 1.08  |
| -4 | -4 | 2 | 8.34    | 1.04  |
| -4 | -4 | 3 | 1345.71 | 17.55 |
| -4 | -4 | 3 | 1344.75 | 15.28 |
| -4 | -4 | 3 | 1245.95 | 13.82 |
| -4 | -4 | 3 | 1360.39 | 17.80 |
| -4 | -4 | 3 | 1314.36 | 16.72 |
| -4 | -4 | 3 | 1339.63 | 17.03 |
| -4 | -4 | 3 | 1298.89 | 15.16 |
| -4 | -4 | 3 | 1376.83 | 16.19 |
| -4 | -4 | 3 | 1316.98 | 16.66 |
| -4 | -4 | 3 | 1332.56 | 15.62 |
| -4 | -4 | 3 | 1268.76 | 16.52 |
| -4 | -4 | 3 | 1317.37 | 14.84 |
| -4 | -4 | 4 | 232.93  | 5.54  |
| -4 | -4 | 4 | 225.11  | 4.28  |
| -4 | -4 | 4 | 198.29  | 5.36  |
| -4 | -4 | 4 | 230.22  | 4.55  |
| -4 | -4 | 4 | 230.79  | 5.93  |
| -4 | -4 | 4 | 223.07  | 4.87  |



## CIF 31

|    |    |   |        |       |
|----|----|---|--------|-------|
| -4 | -4 | 4 | 245.43 | 4.94  |
| -4 | -4 | 4 | 234.79 | 6.24  |
| -4 | -4 | 4 | 217.26 | 5.72  |
| -4 | -4 | 4 | 216.22 | 5.60  |
| -4 | -4 | 4 | 233.58 | 5.36  |
| -4 | -4 | 4 | 225.44 | 4.95  |
| -4 | -4 | 5 | 968.40 | 13.21 |
| -4 | -4 | 5 | 935.80 | 13.08 |
| -4 | -4 | 5 | 975.15 | 11.94 |
| -4 | -4 | 5 | 972.05 | 13.87 |
| -4 | -4 | 5 | 959.10 | 11.54 |
| -4 | -4 | 5 | 979.30 | 12.15 |
| -4 | -4 | 5 | 978.49 | 12.38 |
| -4 | -4 | 5 | 997.50 | 14.25 |
| -4 | -4 | 5 | 892.18 | 11.75 |
| -4 | -4 | 5 | 905.02 | 13.23 |
| -4 | -4 | 5 | 931.22 | 13.34 |
| -4 | -4 | 5 | 913.08 | 12.83 |
| -4 | -4 | 6 | 332.23 | 6.98  |
| -4 | -4 | 6 | 355.89 | 7.45  |
| -4 | -4 | 6 | 346.73 | 7.12  |
| -4 | -4 | 6 | 326.21 | 6.25  |
| -4 | -4 | 6 | 355.04 | 6.29  |
| -4 | -4 | 6 | 329.05 | 6.30  |
| -4 | -4 | 6 | 307.35 | 7.34  |
| -4 | -4 | 6 | 313.41 | 6.98  |
| -4 | -4 | 6 | 357.00 | 7.09  |
| -4 | -4 | 6 | 329.54 | 6.14  |
| -4 | -4 | 6 | 330.64 | 6.49  |
| -4 | -4 | 6 | 331.84 | 6.88  |
| -4 | -4 | 7 | 230.44 | 5.43  |
| -4 | -4 | 7 | 207.93 | 5.66  |
| -4 | -4 | 7 | 228.02 | 5.82  |
| -4 | -4 | 7 | 218.56 | 5.66  |
| -4 | -4 | 7 | 221.99 | 6.11  |
| -4 | -4 | 7 | 218.17 | 5.33  |
| -4 | -4 | 7 | 230.10 | 4.93  |
| -4 | -4 | 7 | 238.40 | 5.30  |
| -4 | -4 | 7 | 215.76 | 5.91  |
| -4 | -4 | 7 | 198.99 | 5.00  |
| -4 | -4 | 7 | 217.58 | 5.89  |

## CIF 31

|    |    |    |        |      |
|----|----|----|--------|------|
| -4 | -4 | 7  | 206.06 | 5.90 |
| -4 | -4 | 7  | 219.75 | 5.72 |
| -4 | -4 | 7  | 221.49 | 5.53 |
| -4 | -4 | 8  | 106.82 | 3.08 |
| -4 | -4 | 8  | 105.59 | 4.09 |
| -4 | -4 | 8  | 117.73 | 4.09 |
| -4 | -4 | 8  | 114.52 | 4.14 |
| -4 | -4 | 8  | 117.00 | 4.33 |
| -4 | -4 | 8  | 115.64 | 4.37 |
| -4 | -4 | 8  | 118.67 | 4.55 |
| -4 | -4 | 8  | 113.44 | 3.83 |
| -4 | -4 | 8  | 121.02 | 4.00 |
| -4 | -4 | 8  | 111.02 | 3.81 |
| -4 | -4 | 8  | 112.51 | 3.91 |
| -4 | -4 | 8  | 104.60 | 4.03 |
| -4 | -4 | 8  | 120.28 | 4.21 |
| -4 | -4 | 8  | 104.16 | 4.16 |
| -4 | -4 | 8  | 125.71 | 4.51 |
| -4 | -4 | 8  | 116.79 | 3.91 |
| -4 | -4 | 8  | 104.00 | 3.17 |
| -4 | -4 | 9  | 134.95 | 4.84 |
| -4 | -4 | 9  | 124.43 | 4.64 |
| -4 | -4 | 9  | 118.99 | 4.17 |
| -4 | -4 | 9  | 120.36 | 4.26 |
| -4 | -4 | 9  | 126.55 | 4.22 |
| -4 | -4 | 9  | 126.42 | 4.60 |
| -4 | -4 | 9  | 117.12 | 3.46 |
| -4 | -4 | 9  | 123.44 | 4.48 |
| -4 | -4 | 9  | 112.24 | 4.01 |
| -4 | -4 | 9  | 125.01 | 4.63 |
| -4 | -4 | 9  | 110.32 | 4.14 |
| -4 | -4 | 9  | 124.80 | 4.64 |
| -4 | -4 | 9  | 123.83 | 4.36 |
| -4 | -4 | 10 | 98.80  | 3.36 |
| -4 | -4 | 10 | 86.63  | 4.12 |
| -4 | -4 | 10 | 100.20 | 4.21 |
| -4 | -4 | 10 | 91.35  | 4.09 |
| -4 | -4 | 10 | 122.77 | 4.32 |
| -4 | -4 | 10 | 100.62 | 4.26 |
| -4 | -4 | 10 | 112.36 | 4.09 |
| -4 | -4 | 10 | 87.58  | 3.68 |

## CIF 31

|    |    |    |        |       |
|----|----|----|--------|-------|
| -4 | -4 | 10 | 95.59  | 3.74  |
| -4 | -4 | 10 | 87.61  | 3.70  |
| -4 | -4 | 10 | 90.69  | 4.05  |
| -4 | -4 | 10 | 109.89 | 4.13  |
| -4 | -4 | 10 | 104.63 | 4.28  |
| -4 | -4 | 11 | 940.75 | 13.82 |
| -4 | -4 | 11 | 907.66 | 13.93 |
| -4 | -4 | 11 | 833.20 | 12.36 |
| -4 | -4 | 11 | 885.89 | 13.80 |
| -4 | -4 | 11 | 919.57 | 14.22 |
| -4 | -4 | 11 | 961.70 | 13.78 |
| -4 | -4 | 11 | 933.47 | 14.14 |
| -4 | -4 | 11 | 874.02 | 12.06 |
| -4 | -4 | 11 | 825.38 | 12.89 |
| -4 | -4 | 11 | 790.86 | 12.30 |
| -4 | -4 | 11 | 890.93 | 13.85 |
| -4 | -4 | 11 | 807.74 | 13.50 |
| -4 | -4 | 11 | 896.58 | 13.21 |
| -4 | -4 | 12 | 308.48 | 7.30  |
| -4 | -4 | 12 | 267.02 | 6.82  |
| -4 | -4 | 12 | 301.67 | 7.08  |
| -4 | -4 | 12 | 285.88 | 7.21  |
| -4 | -4 | 12 | 306.68 | 7.01  |
| -4 | -4 | 12 | 295.38 | 6.15  |
| -4 | -4 | 12 | 295.58 | 7.24  |
| -4 | -4 | 12 | 323.98 | 7.51  |
| -4 | -4 | 12 | 286.41 | 6.75  |
| -4 | -4 | 12 | 271.33 | 6.93  |
| -4 | -4 | 12 | 295.46 | 6.57  |
| -4 | -4 | 13 | 77.47  | 3.46  |
| -4 | -4 | 13 | 74.63  | 3.34  |
| -4 | -4 | 13 | 68.96  | 3.29  |
| -4 | -4 | 13 | 69.37  | 2.76  |
| -4 | -4 | 13 | 65.45  | 3.04  |
| -4 | -4 | 13 | 62.15  | 3.23  |
| -4 | -4 | 13 | 68.03  | 3.10  |
| -4 | -4 | 13 | 73.92  | 3.33  |
| -4 | -4 | 13 | 72.06  | 3.18  |
| -4 | -4 | 13 | 62.43  | 3.07  |
| -4 | -4 | 14 | 0.74   | 0.69  |
| -4 | -4 | 14 | 1.12   | 0.93  |

## CIF 31

|    |    |     |        |      |
|----|----|-----|--------|------|
| -4 | -4 | 14  | 0.95   | 0.89 |
| -4 | -4 | 14  | 0.77   | 0.90 |
| -4 | -4 | 14  | 1.25   | 0.77 |
| -4 | -4 | 14  | 0.46   | 0.88 |
| -4 | -4 | 14  | 0.78   | 0.79 |
| -4 | -4 | 14  | 1.34   | 0.70 |
| -4 | -4 | 14  | 0.87   | 0.88 |
| -4 | -4 | 15  | 66.78  | 2.46 |
| -4 | -4 | 15  | 69.33  | 2.54 |
| -4 | -4 | 15  | 70.07  | 2.51 |
| -4 | -4 | 15  | 62.53  | 2.13 |
| -4 | -4 | 15  | 67.58  | 2.35 |
| -4 | -4 | 15  | 71.00  | 2.44 |
| -4 | -3 | -10 | 15.02  | 1.25 |
| -4 | -3 | -10 | 14.67  | 0.88 |
| -4 | -3 | -9  | 0.78   | 0.63 |
| -4 | -3 | -9  | 0.94   | 0.60 |
| -4 | -3 | -9  | 1.57   | 1.00 |
| -4 | -3 | -9  | 1.09   | 0.66 |
| -4 | -3 | -8  | 468.47 | 7.47 |
| -4 | -3 | -8  | 490.97 | 7.82 |
| -4 | -3 | -8  | 493.45 | 7.78 |
| -4 | -3 | -8  | 479.34 | 7.73 |
| -4 | -3 | -7  | 69.33  | 2.94 |
| -4 | -3 | -7  | 67.35  | 3.75 |
| -4 | -3 | -7  | 57.57  | 7.24 |
| -4 | -3 | -7  | 71.03  | 3.00 |
| -4 | -3 | -7  | 61.18  | 2.71 |
| -4 | -3 | -7  | 70.17  | 3.03 |
| -4 | -3 | -7  | 65.18  | 2.49 |
| -4 | -3 | -7  | 66.17  | 2.96 |
| -4 | -3 | -6  | 59.27  | 2.78 |
| -4 | -3 | -6  | 54.79  | 2.87 |
| -4 | -3 | -6  | 56.69  | 2.80 |
| -4 | -3 | -6  | 56.06  | 2.83 |
| -4 | -3 | -6  | 55.22  | 2.55 |
| -4 | -3 | -6  | 60.16  | 3.65 |
| -4 | -3 | -6  | 61.58  | 8.25 |
| -4 | -3 | -6  | 58.89  | 2.92 |
| -4 | -3 | -5  | 59.84  | 2.96 |
| -4 | -3 | -5  | 59.33  | 3.00 |

## CIF 31

|    |    |    |        |      |
|----|----|----|--------|------|
| -4 | -3 | -5 | 58.39  | 2.87 |
| -4 | -3 | -5 | 60.43  | 7.96 |
| -4 | -3 | -5 | 55.97  | 2.68 |
| -4 | -3 | -4 | 312.10 | 6.78 |
| -4 | -3 | -4 | 278.04 | 7.37 |
| -4 | -3 | -4 | 276.59 | 6.01 |
| -4 | -3 | -4 | 308.79 | 6.38 |
| -4 | -3 | -4 | 281.92 | 9.59 |
| -4 | -3 | -3 | 255.60 | 5.96 |
| -4 | -3 | -3 | 257.08 | 5.88 |
| -4 | -3 | -3 | 240.68 | 6.40 |
| -4 | -3 | -3 | 260.24 | 5.81 |
| -4 | -3 | -3 | 252.88 | 5.74 |
| -4 | -3 | -3 | 266.38 | 5.82 |
| -4 | -3 | -3 | 246.42 | 5.59 |
| -4 | -3 | -2 | 26.97  | 1.85 |
| -4 | -3 | -2 | 30.78  | 3.97 |
| -4 | -3 | -2 | 33.78  | 2.42 |
| -4 | -3 | -2 | 26.47  | 1.75 |
| -4 | -3 | -2 | 23.84  | 1.73 |
| -4 | -3 | -2 | 32.12  | 2.01 |
| -4 | -3 | -2 | 27.27  | 2.06 |
| -4 | -3 | -2 | 25.66  | 1.72 |
| -4 | -3 | -1 | 224.70 | 5.00 |
| -4 | -3 | -1 | 207.50 | 4.73 |
| -4 | -3 | -1 | 223.61 | 5.40 |
| -4 | -3 | -1 | 203.95 | 5.99 |
| -4 | -3 | -1 | 205.03 | 4.33 |
| -4 | -3 | -1 | 206.07 | 4.76 |
| -4 | -3 | -1 | 215.14 | 5.65 |
| -4 | -3 | -1 | 214.63 | 5.09 |
| -4 | -3 | -1 | 222.39 | 5.79 |
| -4 | -3 | -1 | 209.72 | 5.42 |
| -4 | -3 | 0  | 245.81 | 4.98 |
| -4 | -3 | 0  | 238.64 | 5.89 |
| -4 | -3 | 0  | 270.17 | 5.32 |
| -4 | -3 | 0  | 238.12 | 5.68 |
| -4 | -3 | 0  | 256.19 | 6.02 |
| -4 | -3 | 0  | 253.43 | 4.85 |
| -4 | -3 | 0  | 253.04 | 4.99 |
| -4 | -3 | 0  | 225.89 | 6.08 |

## CIF 31

|    |    |   |         |       |
|----|----|---|---------|-------|
| -4 | -3 | 0 | 259.56  | 5.51  |
| -4 | -3 | 1 | 113.17  | 3.12  |
| -4 | -3 | 1 | 109.49  | 3.02  |
| -4 | -3 | 1 | 95.39   | 3.39  |
| -4 | -3 | 1 | 93.06   | 3.46  |
| -4 | -3 | 1 | 95.56   | 2.66  |
| -4 | -3 | 1 | 97.70   | 3.83  |
| -4 | -3 | 1 | 111.00  | 3.48  |
| -4 | -3 | 1 | 105.62  | 3.08  |
| -4 | -3 | 1 | 99.58   | 3.52  |
| -4 | -3 | 2 | 17.56   | 1.76  |
| -4 | -3 | 2 | 19.35   | 1.60  |
| -4 | -3 | 2 | 19.63   | 1.19  |
| -4 | -3 | 2 | 17.61   | 1.57  |
| -4 | -3 | 2 | 19.36   | 1.06  |
| -4 | -3 | 2 | 20.30   | 1.34  |
| -4 | -3 | 2 | 17.57   | 1.79  |
| -4 | -3 | 2 | 20.26   | 1.69  |
| -4 | -3 | 2 | 18.35   | 1.11  |
| -4 | -3 | 2 | 18.24   | 1.55  |
| -4 | -3 | 2 | 18.42   | 1.56  |
| -4 | -3 | 2 | 19.27   | 1.43  |
| -4 | -3 | 3 | 2600.51 | 26.65 |
| -4 | -3 | 3 | 2596.86 | 26.91 |
| -4 | -3 | 3 | 2574.24 | 24.34 |
| -4 | -3 | 3 | 2677.01 | 26.72 |
| -4 | -3 | 3 | 2528.44 | 25.96 |
| -4 | -3 | 3 | 2664.34 | 25.97 |
| -4 | -3 | 3 | 2458.82 | 26.89 |
| -4 | -3 | 3 | 2730.11 | 24.76 |
| -4 | -3 | 3 | 2617.26 | 24.66 |
| -4 | -3 | 4 | 93.35   | 3.46  |
| -4 | -3 | 4 | 96.00   | 3.10  |
| -4 | -3 | 4 | 103.85  | 2.89  |
| -4 | -3 | 4 | 94.49   | 3.35  |
| -4 | -3 | 4 | 93.23   | 3.34  |
| -4 | -3 | 4 | 94.27   | 3.16  |
| -4 | -3 | 4 | 98.53   | 3.67  |
| -4 | -3 | 4 | 112.55  | 3.11  |
| -4 | -3 | 4 | 92.44   | 3.50  |
| -4 | -3 | 4 | 101.18  | 2.78  |

## CIF 31

|    |    |   |         |       |
|----|----|---|---------|-------|
| -4 | -3 | 4 | 94.90   | 3.42  |
| -4 | -3 | 4 | 97.81   | 3.23  |
| -4 | -3 | 4 | 102.16  | 3.59  |
| -4 | -3 | 4 | 89.68   | 2.75  |
| -4 | -3 | 4 | 99.68   | 2.75  |
| -4 | -3 | 4 | 90.20   | 3.24  |
| -4 | -3 | 4 | 93.82   | 3.30  |
| -4 | -3 | 4 | 102.79  | 3.28  |
| -4 | -3 | 4 | 101.11  | 3.38  |
| -4 | -3 | 5 | 961.69  | 12.36 |
| -4 | -3 | 5 | 946.44  | 12.97 |
| -4 | -3 | 5 | 968.22  | 12.82 |
| -4 | -3 | 5 | 925.73  | 12.27 |
| -4 | -3 | 5 | 970.71  | 13.07 |
| -4 | -3 | 5 | 915.26  | 12.02 |
| -4 | -3 | 5 | 929.74  | 12.35 |
| -4 | -3 | 5 | 939.22  | 11.41 |
| -4 | -3 | 5 | 934.44  | 12.69 |
| -4 | -3 | 5 | 945.79  | 11.49 |
| -4 | -3 | 5 | 915.11  | 11.46 |
| -4 | -3 | 5 | 932.61  | 11.29 |
| -4 | -3 | 5 | 998.48  | 11.79 |
| -4 | -3 | 5 | 889.12  | 12.66 |
| -4 | -3 | 5 | 918.84  | 12.68 |
| -4 | -3 | 5 | 994.87  | 12.64 |
| -4 | -3 | 6 | 93.90   | 3.36  |
| -4 | -3 | 6 | 94.19   | 3.27  |
| -4 | -3 | 6 | 81.70   | 3.26  |
| -4 | -3 | 6 | 103.19  | 3.16  |
| -4 | -3 | 6 | 106.84  | 2.66  |
| -4 | -3 | 6 | 96.56   | 3.43  |
| -4 | -3 | 6 | 95.36   | 3.46  |
| -4 | -3 | 6 | 99.43   | 2.94  |
| -4 | -3 | 6 | 93.64   | 2.98  |
| -4 | -3 | 6 | 114.53  | 3.41  |
| -4 | -3 | 6 | 95.24   | 3.54  |
| -4 | -3 | 6 | 76.11   | 3.27  |
| -4 | -3 | 6 | 90.28   | 3.41  |
| -4 | -3 | 6 | 98.03   | 3.27  |
| -4 | -3 | 7 | 1001.44 | 13.40 |
| -4 | -3 | 7 | 811.97  | 12.67 |

## CIF 31

|    |    |    |         |       |
|----|----|----|---------|-------|
| -4 | -3 | 7  | 910.23  | 12.90 |
| -4 | -3 | 7  | 965.60  | 13.46 |
| -4 | -3 | 7  | 919.90  | 11.40 |
| -4 | -3 | 7  | 933.88  | 12.74 |
| -4 | -3 | 7  | 1021.30 | 12.74 |
| -4 | -3 | 7  | 965.70  | 11.33 |
| -4 | -3 | 7  | 891.02  | 13.21 |
| -4 | -3 | 7  | 931.39  | 12.20 |
| -4 | -3 | 7  | 920.86  | 13.18 |
| -4 | -3 | 7  | 1024.72 | 13.31 |
| -4 | -3 | 7  | 1010.96 | 13.40 |
| -4 | -3 | 7  | 1091.34 | 13.18 |
| -4 | -3 | 7  | 936.24  | 12.39 |
| -4 | -3 | 7  | 937.37  | 13.01 |
| -4 | -3 | 8  | 70.93   | 3.18  |
| -4 | -3 | 8  | 68.16   | 3.15  |
| -4 | -3 | 8  | 67.09   | 3.10  |
| -4 | -3 | 8  | 70.37   | 3.33  |
| -4 | -3 | 8  | 69.38   | 3.08  |
| -4 | -3 | 8  | 70.70   | 3.22  |
| -4 | -3 | 8  | 61.11   | 3.20  |
| -4 | -3 | 8  | 73.37   | 3.10  |
| -4 | -3 | 8  | 72.40   | 2.63  |
| -4 | -3 | 8  | 69.67   | 2.91  |
| -4 | -3 | 8  | 72.35   | 3.22  |
| -4 | -3 | 8  | 70.63   | 3.15  |
| -4 | -3 | 9  | 852.84  | 13.15 |
| -4 | -3 | 9  | 868.14  | 12.51 |
| -4 | -3 | 9  | 800.41  | 12.42 |
| -4 | -3 | 9  | 845.47  | 11.27 |
| -4 | -3 | 9  | 813.57  | 12.97 |
| -4 | -3 | 9  | 797.14  | 12.46 |
| -4 | -3 | 9  | 828.04  | 12.70 |
| -4 | -3 | 9  | 739.09  | 11.69 |
| -4 | -3 | 9  | 825.97  | 12.41 |
| -4 | -3 | 9  | 777.94  | 12.79 |
| -4 | -3 | 9  | 820.48  | 12.29 |
| -4 | -3 | 9  | 833.90  | 12.47 |
| -4 | -3 | 10 | 7.35    | 1.35  |
| -4 | -3 | 10 | 6.51    | 1.30  |
| -4 | -3 | 10 | 6.41    | 1.28  |



## CIF 31

|    |    |    |        |      |
|----|----|----|--------|------|
| -4 | -3 | 10 | 7.03   | 1.31 |
| -4 | -3 | 10 | 6.68   | 1.60 |
| -4 | -3 | 10 | 4.98   | 1.42 |
| -4 | -3 | 10 | 5.86   | 1.39 |
| -4 | -3 | 10 | 5.53   | 1.13 |
| -4 | -3 | 10 | 5.58   | 1.39 |
| -4 | -3 | 10 | 5.72   | 1.27 |
| -4 | -3 | 10 | 5.29   | 1.45 |
| -4 | -3 | 10 | 6.11   | 1.48 |
| -4 | -3 | 10 | 5.63   | 1.21 |
| -4 | -3 | 11 | 209.03 | 6.18 |
| -4 | -3 | 11 | 224.95 | 5.74 |
| -4 | -3 | 11 | 223.31 | 6.52 |
| -4 | -3 | 11 | 229.51 | 6.13 |
| -4 | -3 | 11 | 213.10 | 5.45 |
| -4 | -3 | 11 | 237.45 | 6.05 |
| -4 | -3 | 11 | 230.65 | 6.60 |
| -4 | -3 | 11 | 215.65 | 6.28 |
| -4 | -3 | 11 | 207.71 | 5.89 |
| -4 | -3 | 11 | 215.12 | 6.55 |
| -4 | -3 | 11 | 195.83 | 5.90 |
| -4 | -3 | 11 | 211.96 | 5.79 |
| -4 | -3 | 11 | 221.66 | 6.43 |
| -4 | -3 | 12 | 44.25  | 2.48 |
| -4 | -3 | 12 | 43.16  | 2.80 |
| -4 | -3 | 12 | 36.55  | 2.67 |
| -4 | -3 | 12 | 41.71  | 2.85 |
| -4 | -3 | 12 | 48.75  | 2.80 |
| -4 | -3 | 12 | 32.58  | 2.36 |
| -4 | -3 | 12 | 35.85  | 2.72 |
| -4 | -3 | 12 | 36.18  | 2.31 |
| -4 | -3 | 12 | 42.17  | 2.84 |
| -4 | -3 | 12 | 38.98  | 2.39 |
| -4 | -3 | 12 | 38.68  | 2.73 |
| -4 | -3 | 12 | 36.93  | 2.23 |
| -4 | -3 | 13 | 145.08 | 4.86 |
| -4 | -3 | 13 | 175.01 | 5.27 |
| -4 | -3 | 13 | 161.75 | 5.19 |
| -4 | -3 | 13 | 155.39 | 4.28 |
| -4 | -3 | 13 | 168.88 | 4.96 |
| -4 | -3 | 13 | 164.96 | 4.63 |

## CIF 31

|    |    |     |        |       |
|----|----|-----|--------|-------|
| -4 | -3 | 13  | 154.12 | 4.82  |
| -4 | -3 | 13  | 166.46 | 5.19  |
| -4 | -3 | 13  | 170.12 | 5.25  |
| -4 | -3 | 13  | 164.76 | 5.20  |
| -4 | -3 | 13  | 155.87 | 5.00  |
| -4 | -3 | 14  | 72.37  | 3.03  |
| -4 | -3 | 14  | 80.39  | 3.34  |
| -4 | -3 | 14  | 69.84  | 3.12  |
| -4 | -3 | 14  | 78.39  | 3.24  |
| -4 | -3 | 14  | 71.42  | 3.10  |
| -4 | -3 | 14  | 74.42  | 3.21  |
| -4 | -3 | 14  | 79.54  | 3.06  |
| -4 | -3 | 14  | 72.06  | 3.00  |
| -4 | -3 | 14  | 72.38  | 3.17  |
| -4 | -3 | 15  | 83.76  | 2.92  |
| -4 | -3 | 15  | 75.14  | 2.62  |
| -4 | -3 | 15  | 83.74  | 2.92  |
| -4 | -3 | 15  | 81.99  | 2.84  |
| -4 | -3 | 16  | 50.16  | 1.70  |
| -4 | -3 | 16  | 48.80  | 1.72  |
| -4 | -2 | -10 | 82.40  | 2.38  |
| -4 | -2 | -10 | 68.21  | 3.07  |
| -4 | -2 | -9  | 13.19  | 1.18  |
| -4 | -2 | -9  | 10.07  | 6.16  |
| -4 | -2 | -9  | 14.15  | 1.88  |
| -4 | -2 | -9  | 9.53   | 1.22  |
| -4 | -2 | -9  | 8.67   | 1.13  |
| -4 | -2 | -9  | 10.24  | 1.17  |
| -4 | -2 | -8  | 8.67   | 1.27  |
| -4 | -2 | -8  | 9.67   | 1.32  |
| -4 | -2 | -8  | 13.40  | 2.06  |
| -4 | -2 | -8  | 8.45   | 1.27  |
| -4 | -2 | -8  | 10.98  | 1.29  |
| -4 | -2 | -8  | 9.21   | 3.94  |
| -4 | -2 | -8  | 13.19  | 8.03  |
| -4 | -2 | -7  | 489.74 | 8.70  |
| -4 | -2 | -7  | 505.80 | 8.81  |
| -4 | -2 | -7  | 507.70 | 8.88  |
| -4 | -2 | -7  | 491.83 | 9.44  |
| -4 | -2 | -7  | 501.11 | 10.80 |
| -4 | -2 | -7  | 505.01 | 8.79  |

## CIF 31

|    |    |    |        |       |
|----|----|----|--------|-------|
| -4 | -2 | -7 | 516.62 | 10.79 |
| -4 | -2 | -7 | 509.23 | 13.70 |
| -4 | -2 | -7 | 486.57 | 8.64  |
| -4 | -2 | -7 | 476.08 | 7.94  |
| -4 | -2 | -6 | 237.35 | 5.52  |
| -4 | -2 | -6 | 227.56 | 5.82  |
| -4 | -2 | -6 | 239.75 | 5.87  |
| -4 | -2 | -6 | 243.69 | 5.97  |
| -4 | -2 | -6 | 221.00 | 7.54  |
| -4 | -2 | -6 | 220.48 | 5.54  |
| -4 | -2 | -6 | 247.77 | 10.43 |
| -4 | -2 | -6 | 243.01 | 6.39  |
| -4 | -2 | -6 | 239.73 | 5.50  |
| -4 | -2 | -6 | 253.69 | 7.28  |
| -4 | -2 | -5 | 7.04   | 1.28  |
| -4 | -2 | -5 | 5.24   | 1.09  |
| -4 | -2 | -5 | 6.29   | 1.20  |
| -4 | -2 | -5 | 7.94   | 1.60  |
| -4 | -2 | -5 | 4.01   | 1.90  |
| -4 | -2 | -5 | 3.75   | 3.29  |
| -4 | -2 | -5 | 5.15   | 1.09  |
| -4 | -2 | -5 | 9.39   | 6.69  |
| -4 | -2 | -5 | 7.71   | 1.33  |
| -4 | -2 | -4 | 108.33 | 3.74  |
| -4 | -2 | -4 | 99.58  | 3.29  |
| -4 | -2 | -4 | 117.44 | 6.89  |
| -4 | -2 | -4 | 101.95 | 4.05  |
| -4 | -2 | -4 | 108.67 | 3.70  |
| -4 | -2 | -4 | 107.10 | 4.42  |
| -4 | -2 | -4 | 106.45 | 3.67  |
| -4 | -2 | -4 | 100.72 | 3.73  |
| -4 | -2 | -4 | 102.88 | 3.26  |
| -4 | -2 | -4 | 103.26 | 3.45  |
| -4 | -2 | -3 | 502.42 | 8.42  |
| -4 | -2 | -3 | 549.70 | 9.82  |
| -4 | -2 | -3 | 503.70 | 8.14  |
| -4 | -2 | -3 | 530.02 | 8.45  |
| -4 | -2 | -3 | 543.17 | 8.33  |
| -4 | -2 | -3 | 584.84 | 11.52 |
| -4 | -2 | -3 | 560.62 | 8.49  |
| -4 | -2 | -2 | 323.00 | 6.77  |

## CIF 31

|    |    |    |         |       |
|----|----|----|---------|-------|
| -4 | -2 | -2 | 302.44  | 5.92  |
| -4 | -2 | -2 | 330.48  | 6.90  |
| -4 | -2 | -2 | 324.50  | 6.06  |
| -4 | -2 | -2 | 331.34  | 6.11  |
| -4 | -2 | -2 | 309.29  | 5.83  |
| -4 | -2 | -2 | 312.64  | 5.90  |
| -4 | -2 | -2 | 327.02  | 5.96  |
| -4 | -2 | -2 | 344.19  | 6.99  |
| -4 | -2 | -1 | 541.19  | 8.58  |
| -4 | -2 | -1 | 518.47  | 7.84  |
| -4 | -2 | -1 | 540.73  | 8.52  |
| -4 | -2 | -1 | 513.17  | 7.71  |
| -4 | -2 | -1 | 521.39  | 7.77  |
| -4 | -2 | -1 | 567.76  | 9.52  |
| -4 | -2 | -1 | 524.86  | 9.49  |
| -4 | -2 | -1 | 541.72  | 8.11  |
| -4 | -2 | -1 | 521.97  | 8.58  |
| -4 | -2 | -1 | 532.60  | 7.87  |
| -4 | -2 | -1 | 556.16  | 8.96  |
| -4 | -2 | -1 | 561.08  | 8.94  |
| -4 | -2 | 0  | 37.83   | 2.35  |
| -4 | -2 | 0  | 33.50   | 2.01  |
| -4 | -2 | 0  | 36.30   | 1.94  |
| -4 | -2 | 0  | 37.13   | 2.23  |
| -4 | -2 | 0  | 36.26   | 1.99  |
| -4 | -2 | 0  | 39.14   | 2.11  |
| -4 | -2 | 0  | 39.57   | 2.12  |
| -4 | -2 | 0  | 36.85   | 2.59  |
| -4 | -2 | 0  | 33.20   | 1.79  |
| -4 | -2 | 1  | 2041.45 | 21.96 |
| -4 | -2 | 1  | 2120.25 | 21.25 |
| -4 | -2 | 1  | 2123.24 | 21.70 |
| -4 | -2 | 1  | 2117.88 | 22.59 |
| -4 | -2 | 1  | 2159.99 | 19.57 |
| -4 | -2 | 1  | 2094.75 | 19.76 |
| -4 | -2 | 1  | 2018.15 | 21.31 |
| -4 | -2 | 1  | 2123.32 | 20.81 |
| -4 | -2 | 2  | 32.25   | 1.97  |
| -4 | -2 | 2  | 30.15   | 1.40  |
| -4 | -2 | 2  | 32.77   | 2.07  |
| -4 | -2 | 2  | 29.79   | 1.35  |

## CIF 31

|    |    |   |         |       |
|----|----|---|---------|-------|
| -4 | -2 | 2 | 30.35   | 1.97  |
| -4 | -2 | 2 | 33.10   | 1.94  |
| -4 | -2 | 2 | 26.80   | 1.78  |
| -4 | -2 | 2 | 29.44   | 1.76  |
| -4 | -2 | 2 | 29.93   | 1.71  |
| -4 | -2 | 2 | 29.66   | 1.61  |
| -4 | -2 | 2 | 30.08   | 1.78  |
| -4 | -2 | 3 | 23.61   | 1.37  |
| -4 | -2 | 3 | 25.51   | 1.32  |
| -4 | -2 | 3 | 24.09   | 1.32  |
| -4 | -2 | 3 | 19.77   | 1.49  |
| -4 | -2 | 3 | 21.36   | 1.71  |
| -4 | -2 | 3 | 25.27   | 1.61  |
| -4 | -2 | 3 | 22.99   | 1.44  |
| -4 | -2 | 3 | 22.85   | 1.52  |
| -4 | -2 | 3 | 25.91   | 1.60  |
| -4 | -2 | 4 | 452.41  | 7.81  |
| -4 | -2 | 4 | 447.95  | 7.12  |
| -4 | -2 | 4 | 435.18  | 7.42  |
| -4 | -2 | 4 | 476.83  | 6.75  |
| -4 | -2 | 4 | 463.42  | 6.94  |
| -4 | -2 | 4 | 466.73  | 7.15  |
| -4 | -2 | 4 | 426.55  | 7.37  |
| -4 | -2 | 4 | 472.27  | 5.83  |
| -4 | -2 | 4 | 474.08  | 7.88  |
| -4 | -2 | 4 | 463.19  | 6.22  |
| -4 | -2 | 4 | 437.89  | 7.54  |
| -4 | -2 | 4 | 458.12  | 7.35  |
| -4 | -2 | 4 | 491.29  | 6.97  |
| -4 | -2 | 4 | 466.45  | 7.48  |
| -4 | -2 | 4 | 500.14  | 7.36  |
| -4 | -2 | 4 | 449.71  | 7.47  |
| -4 | -2 | 5 | 849.68  | 11.83 |
| -4 | -2 | 5 | 895.45  | 11.71 |
| -4 | -2 | 5 | 946.06  | 12.14 |
| -4 | -2 | 5 | 904.28  | 12.17 |
| -4 | -2 | 5 | 924.29  | 12.26 |
| -4 | -2 | 5 | 1052.09 | 12.84 |
| -4 | -2 | 5 | 952.20  | 11.33 |
| -4 | -2 | 5 | 968.73  | 12.35 |
| -4 | -2 | 5 | 964.78  | 11.50 |

## CIF 31

|    |    |   |         |       |
|----|----|---|---------|-------|
| -4 | -2 | 5 | 918.69  | 11.64 |
| -4 | -2 | 5 | 968.87  | 10.40 |
| -4 | -2 | 5 | 932.95  | 10.80 |
| -4 | -2 | 5 | 844.78  | 11.98 |
| -4 | -2 | 5 | 1028.99 | 12.67 |
| -4 | -2 | 5 | 969.51  | 12.16 |
| -4 | -2 | 5 | 919.52  | 11.53 |
| -4 | -2 | 5 | 949.64  | 12.16 |
| -4 | -2 | 6 | 412.37  | 7.62  |
| -4 | -2 | 6 | 435.58  | 7.21  |
| -4 | -2 | 6 | 446.32  | 7.47  |
| -4 | -2 | 6 | 416.55  | 7.53  |
| -4 | -2 | 6 | 478.30  | 7.91  |
| -4 | -2 | 6 | 461.41  | 7.21  |
| -4 | -2 | 6 | 384.59  | 7.12  |
| -4 | -2 | 6 | 478.90  | 7.39  |
| -4 | -2 | 6 | 479.94  | 6.55  |
| -4 | -2 | 6 | 458.37  | 7.85  |
| -4 | -2 | 6 | 435.68  | 7.53  |
| -4 | -2 | 6 | 420.56  | 7.50  |
| -4 | -2 | 6 | 427.60  | 6.67  |
| -4 | -2 | 6 | 462.53  | 7.91  |
| -4 | -2 | 6 | 353.68  | 7.08  |
| -4 | -2 | 6 | 454.90  | 7.87  |
| -4 | -2 | 6 | 428.75  | 7.55  |
| -4 | -2 | 6 | 460.26  | 7.44  |
| -4 | -2 | 7 | 5.25    | 0.98  |
| -4 | -2 | 7 | 3.06    | 0.95  |
| -4 | -2 | 7 | 3.11    | 0.94  |
| -4 | -2 | 7 | 3.40    | 1.01  |
| -4 | -2 | 7 | 2.68    | 0.70  |
| -4 | -2 | 7 | 7.44    | 1.11  |
| -4 | -2 | 7 | 3.44    | 1.11  |
| -4 | -2 | 7 | 2.23    | 0.82  |
| -4 | -2 | 7 | 3.20    | 0.88  |
| -4 | -2 | 7 | 2.74    | 0.81  |
| -4 | -2 | 7 | 2.96    | 0.95  |
| -4 | -2 | 7 | 2.91    | 0.94  |
| -4 | -2 | 7 | 2.84    | 1.04  |
| -4 | -2 | 7 | 3.29    | 0.97  |
| -4 | -2 | 7 | 1.81    | 0.84  |

## CIF 31

|    |    |    |        |       |
|----|----|----|--------|-------|
| -4 | -2 | 8  | 287.85 | 6.61  |
| -4 | -2 | 8  | 323.45 | 5.96  |
| -4 | -2 | 8  | 320.39 | 6.62  |
| -4 | -2 | 8  | 278.87 | 6.07  |
| -4 | -2 | 8  | 323.26 | 6.64  |
| -4 | -2 | 8  | 342.68 | 6.64  |
| -4 | -2 | 8  | 321.70 | 6.51  |
| -4 | -2 | 8  | 297.09 | 6.85  |
| -4 | -2 | 8  | 292.33 | 6.63  |
| -4 | -2 | 8  | 319.04 | 6.88  |
| -4 | -2 | 9  | 762.48 | 11.85 |
| -4 | -2 | 9  | 692.10 | 10.72 |
| -4 | -2 | 9  | 766.90 | 12.21 |
| -4 | -2 | 9  | 712.39 | 11.54 |
| -4 | -2 | 9  | 784.87 | 11.63 |
| -4 | -2 | 9  | 738.14 | 10.99 |
| -4 | -2 | 9  | 737.84 | 11.62 |
| -4 | -2 | 9  | 724.29 | 10.54 |
| -4 | -2 | 9  | 666.63 | 11.57 |
| -4 | -2 | 10 | 14.21  | 1.68  |
| -4 | -2 | 10 | 15.84  | 1.98  |
| -4 | -2 | 10 | 16.15  | 1.78  |
| -4 | -2 | 10 | 16.43  | 1.66  |
| -4 | -2 | 10 | 16.52  | 1.57  |
| -4 | -2 | 10 | 16.58  | 1.59  |
| -4 | -2 | 10 | 14.58  | 1.92  |
| -4 | -2 | 10 | 17.40  | 1.86  |
| -4 | -2 | 10 | 17.11  | 1.78  |
| -4 | -2 | 11 | 59.47  | 3.14  |
| -4 | -2 | 11 | 60.08  | 3.44  |
| -4 | -2 | 11 | 67.23  | 3.57  |
| -4 | -2 | 11 | 63.02  | 2.99  |
| -4 | -2 | 11 | 55.20  | 3.10  |
| -4 | -2 | 11 | 59.16  | 3.14  |
| -4 | -2 | 11 | 55.39  | 2.68  |
| -4 | -2 | 11 | 59.63  | 3.45  |
| -4 | -2 | 11 | 57.68  | 3.06  |
| -4 | -2 | 12 | 266.23 | 7.08  |
| -4 | -2 | 12 | 237.90 | 6.30  |
| -4 | -2 | 12 | 279.18 | 7.27  |
| -4 | -2 | 12 | 267.97 | 6.56  |

## CIF 31

|    |    |     |        |      |
|----|----|-----|--------|------|
| -4 | -2 | 12  | 274.66 | 6.75 |
| -4 | -2 | 12  | 248.81 | 6.43 |
| -4 | -2 | 12  | 217.06 | 6.56 |
| -4 | -2 | 12  | 265.72 | 7.18 |
| -4 | -2 | 12  | 265.11 | 6.31 |
| -4 | -2 | 12  | 273.57 | 6.63 |
| -4 | -2 | 12  | 248.75 | 5.33 |
| -4 | -2 | 13  | 423.71 | 8.75 |
| -4 | -2 | 13  | 409.78 | 8.64 |
| -4 | -2 | 13  | 417.85 | 8.17 |
| -4 | -2 | 13  | 434.43 | 8.50 |
| -4 | -2 | 13  | 451.14 | 8.27 |
| -4 | -2 | 13  | 442.68 | 8.26 |
| -4 | -2 | 13  | 425.63 | 8.91 |
| -4 | -2 | 13  | 429.88 | 8.87 |
| -4 | -2 | 13  | 392.15 | 8.51 |
| -4 | -2 | 13  | 426.79 | 8.72 |
| -4 | -2 | 14  | 70.97  | 3.17 |
| -4 | -2 | 14  | 72.42  | 3.26 |
| -4 | -2 | 14  | 70.17  | 2.82 |
| -4 | -2 | 14  | 73.45  | 2.96 |
| -4 | -2 | 14  | 61.22  | 2.88 |
| -4 | -2 | 14  | 65.21  | 3.06 |
| -4 | -2 | 14  | 68.42  | 3.11 |
| -4 | -2 | 14  | 63.94  | 2.54 |
| -4 | -2 | 14  | 67.41  | 3.13 |
| -4 | -2 | 14  | 62.19  | 3.02 |
| -4 | -2 | 15  | 1.07   | 0.76 |
| -4 | -2 | 15  | -0.10  | 0.56 |
| -4 | -2 | 15  | 0.27   | 0.76 |
| -4 | -2 | 15  | 0.09   | 0.80 |
| -4 | -2 | 15  | 0.12   | 0.68 |
| -4 | -2 | 15  | 0.29   | 0.76 |
| -4 | -2 | 16  | 252.44 | 4.28 |
| -4 | -2 | 16  | 241.50 | 4.04 |
| -4 | -1 | -11 | 41.22  | 1.72 |
| -4 | -1 | -11 | 39.77  | 2.19 |
| -4 | -1 | -10 | 328.95 | 6.81 |
| -4 | -1 | -10 | 314.37 | 5.50 |
| -4 | -1 | -10 | 314.10 | 5.34 |
| -4 | -1 | -9  | 194.75 | 4.88 |



## CIF 31

|    |    |    |        |       |
|----|----|----|--------|-------|
| -4 | -1 | -9 | 190.75 | 9.32  |
| -4 | -1 | -9 | 242.50 | 6.09  |
| -4 | -1 | -9 | 199.12 | 4.73  |
| -4 | -1 | -9 | 238.52 | 5.51  |
| -4 | -1 | -9 | 239.99 | 5.20  |
| -4 | -1 | -9 | 231.00 | 8.45  |
| -4 | -1 | -9 | 226.64 | 5.13  |
| -4 | -1 | -8 | 4.62   | 1.15  |
| -4 | -1 | -8 | 3.52   | 1.09  |
| -4 | -1 | -8 | 4.16   | 1.76  |
| -4 | -1 | -8 | 6.52   | 5.78  |
| -4 | -1 | -8 | 3.52   | 0.99  |
| -4 | -1 | -8 | 3.80   | 1.78  |
| -4 | -1 | -8 | 2.87   | 3.28  |
| -4 | -1 | -8 | 3.83   | 5.20  |
| -4 | -1 | -8 | 3.06   | 1.08  |
| -4 | -1 | -8 | 3.52   | 0.90  |
| -4 | -1 | -8 | 4.31   | 0.98  |
| -4 | -1 | -7 | 855.77 | 12.47 |
| -4 | -1 | -7 | 850.75 | 12.42 |
| -4 | -1 | -7 | 881.26 | 15.38 |
| -4 | -1 | -7 | 846.24 | 13.14 |
| -4 | -1 | -7 | 915.75 | 12.56 |
| -4 | -1 | -7 | 906.57 | 12.56 |
| -4 | -1 | -7 | 915.23 | 15.07 |
| -4 | -1 | -7 | 840.71 | 12.62 |
| -4 | -1 | -7 | 884.82 | 12.51 |
| -4 | -1 | -7 | 841.83 | 12.29 |
| -4 | -1 | -7 | 812.17 | 11.59 |
| -4 | -1 | -6 | 36.55  | 2.28  |
| -4 | -1 | -6 | 35.15  | 2.32  |
| -4 | -1 | -6 | 32.46  | 2.05  |
| -4 | -1 | -6 | 36.80  | 2.95  |
| -4 | -1 | -6 | 34.76  | 2.26  |
| -4 | -1 | -6 | 38.48  | 2.29  |
| -4 | -1 | -6 | 31.95  | 2.03  |
| -4 | -1 | -6 | 33.99  | 2.48  |
| -4 | -1 | -6 | 35.13  | 2.26  |
| -4 | -1 | -6 | 34.01  | 2.20  |
| -4 | -1 | -6 | 34.12  | 2.11  |
| -4 | -1 | -6 | 38.44  | 3.50  |

## CIF 31

|    |    |    |        |      |
|----|----|----|--------|------|
| -4 | -1 | -5 | 1.37   | 1.75 |
| -4 | -1 | -5 | 3.22   | 0.97 |
| -4 | -1 | -5 | 1.23   | 0.85 |
| -4 | -1 | -5 | 2.03   | 0.79 |
| -4 | -1 | -5 | 1.23   | 0.87 |
| -4 | -1 | -5 | 2.22   | 0.88 |
| -4 | -1 | -5 | 1.71   | 0.89 |
| -4 | -1 | -5 | 1.90   | 0.87 |
| -4 | -1 | -5 | 1.95   | 1.26 |
| -4 | -1 | -5 | 1.78   | 0.85 |
| -4 | -1 | -5 | 2.14   | 0.94 |
| -4 | -1 | -4 | 9.81   | 1.20 |
| -4 | -1 | -4 | 13.60  | 1.40 |
| -4 | -1 | -4 | 11.04  | 1.23 |
| -4 | -1 | -4 | 11.50  | 1.25 |
| -4 | -1 | -4 | 11.62  | 1.70 |
| -4 | -1 | -4 | 12.05  | 1.29 |
| -4 | -1 | -4 | 11.34  | 1.24 |
| -4 | -1 | -4 | 10.34  | 1.10 |
| -4 | -1 | -4 | 10.91  | 1.21 |
| -4 | -1 | -4 | 10.24  | 1.16 |
| -4 | -1 | -3 | 7.84   | 0.93 |
| -4 | -1 | -3 | 8.88   | 1.36 |
| -4 | -1 | -3 | 8.03   | 1.04 |
| -4 | -1 | -3 | 9.40   | 0.93 |
| -4 | -1 | -3 | 9.00   | 0.98 |
| -4 | -1 | -3 | 8.44   | 1.01 |
| -4 | -1 | -3 | 8.42   | 1.01 |
| -4 | -1 | -3 | 9.29   | 1.08 |
| -4 | -1 | -3 | 7.22   | 1.02 |
| -4 | -1 | -3 | 8.64   | 1.08 |
| -4 | -1 | -3 | 7.48   | 0.98 |
| -4 | -1 | -2 | 240.48 | 4.74 |
| -4 | -1 | -2 | 235.69 | 5.11 |
| -4 | -1 | -2 | 239.35 | 4.79 |
| -4 | -1 | -2 | 248.96 | 5.91 |
| -4 | -1 | -2 | 236.57 | 5.66 |
| -4 | -1 | -2 | 228.59 | 5.45 |
| -4 | -1 | -2 | 235.37 | 5.22 |
| -4 | -1 | -2 | 239.43 | 4.83 |
| -4 | -1 | -2 | 240.18 | 4.70 |

## CIF 31

|    |    |    |         |       |
|----|----|----|---------|-------|
| -4 | -1 | -2 | 257.10  | 6.18  |
| -4 | -1 | -2 | 243.94  | 4.74  |
| -4 | -1 | -1 | 1017.39 | 13.19 |
| -4 | -1 | -1 | 986.88  | 13.07 |
| -4 | -1 | -1 | 1023.54 | 12.96 |
| -4 | -1 | 0  | 5585.98 | 48.04 |
| -4 | -1 | 0  | 5447.80 | 51.08 |
| -4 | -1 | 0  | 5577.01 | 49.35 |
| -4 | -1 | 1  | 41.19   | 1.78  |
| -4 | -1 | 1  | 43.18   | 2.09  |
| -4 | -1 | 1  | 33.03   | 1.40  |
| -4 | -1 | 1  | 40.08   | 2.18  |
| -4 | -1 | 1  | 34.05   | 1.48  |
| -4 | -1 | 1  | 32.16   | 1.04  |
| -4 | -1 | 1  | 41.61   | 1.98  |
| -4 | -1 | 1  | 32.32   | 1.61  |
| -4 | -1 | 2  | 1475.09 | 15.53 |
| -4 | -1 | 2  | 1435.56 | 15.23 |
| -4 | -1 | 2  | 1480.26 | 14.73 |
| -4 | -1 | 2  | 1400.50 | 13.50 |
| -4 | -1 | 2  | 1450.34 | 14.59 |
| -4 | -1 | 2  | 1424.02 | 16.53 |
| -4 | -1 | 2  | 1446.94 | 15.89 |
| -4 | -1 | 2  | 1504.75 | 15.27 |
| -4 | -1 | 3  | 296.22  | 5.28  |
| -4 | -1 | 3  | 297.65  | 5.78  |
| -4 | -1 | 3  | 310.88  | 5.91  |
| -4 | -1 | 3  | 293.36  | 4.74  |
| -4 | -1 | 3  | 286.65  | 4.11  |
| -4 | -1 | 3  | 297.55  | 5.47  |
| -4 | -1 | 3  | 297.27  | 4.82  |
| -4 | -1 | 3  | 295.66  | 5.14  |
| -4 | -1 | 3  | 290.26  | 4.61  |
| -4 | -1 | 4  | 1933.67 | 20.78 |
| -4 | -1 | 4  | 2168.73 | 20.22 |
| -4 | -1 | 4  | 2053.88 | 19.83 |
| -4 | -1 | 4  | 2076.95 | 20.56 |
| -4 | -1 | 4  | 2180.83 | 21.69 |
| -4 | -1 | 4  | 2112.10 | 20.12 |
| -4 | -1 | 4  | 2020.25 | 21.22 |
| -4 | -1 | 4  | 2079.93 | 19.16 |

## CIF 31

|    |    |   |         |       |
|----|----|---|---------|-------|
| -4 | -1 | 4 | 1829.50 | 20.62 |
| -4 | -1 | 4 | 1974.56 | 18.82 |
| -4 | -1 | 4 | 1976.56 | 20.72 |
| -4 | -1 | 4 | 2107.57 | 20.76 |
| -4 | -1 | 5 | 5.89    | 1.00  |
| -4 | -1 | 5 | 3.77    | 0.74  |
| -4 | -1 | 5 | 5.99    | 0.89  |
| -4 | -1 | 5 | 3.43    | 0.88  |
| -4 | -1 | 5 | 3.90    | 0.66  |
| -4 | -1 | 5 | 4.91    | 0.79  |
| -4 | -1 | 5 | 4.41    | 0.88  |
| -4 | -1 | 5 | 3.81    | 0.85  |
| -4 | -1 | 5 | 4.88    | 0.90  |
| -4 | -1 | 5 | 3.55    | 0.39  |
| -4 | -1 | 5 | 2.69    | 0.81  |
| -4 | -1 | 5 | 2.95    | 0.76  |
| -4 | -1 | 5 | 4.15    | 0.94  |
| -4 | -1 | 5 | 4.83    | 0.91  |
| -4 | -1 | 5 | 3.78    | 0.83  |
| -4 | -1 | 6 | 113.98  | 3.28  |
| -4 | -1 | 6 | 107.84  | 3.47  |
| -4 | -1 | 6 | 118.25  | 3.66  |
| -4 | -1 | 6 | 103.83  | 3.33  |
| -4 | -1 | 6 | 139.42  | 3.86  |
| -4 | -1 | 6 | 80.52   | 3.48  |
| -4 | -1 | 6 | 114.80  | 2.93  |
| -4 | -1 | 6 | 118.61  | 3.31  |
| -4 | -1 | 6 | 100.44  | 3.21  |
| -4 | -1 | 6 | 100.11  | 3.33  |
| -4 | -1 | 6 | 112.99  | 3.17  |
| -4 | -1 | 6 | 95.66   | 3.35  |
| -4 | -1 | 6 | 93.79   | 3.20  |
| -4 | -1 | 7 | 18.80   | 1.63  |
| -4 | -1 | 7 | 16.21   | 1.47  |
| -4 | -1 | 7 | 16.63   | 1.55  |
| -4 | -1 | 7 | 16.97   | 1.41  |
| -4 | -1 | 7 | 15.51   | 1.39  |
| -4 | -1 | 7 | 14.95   | 1.58  |
| -4 | -1 | 7 | 17.30   | 1.77  |
| -4 | -1 | 7 | 15.10   | 1.47  |
| -4 | -1 | 7 | 15.75   | 1.57  |

## CIF 31

|    |    |    |        |       |
|----|----|----|--------|-------|
| -4 | -1 | 7  | 16.89  | 1.39  |
| -4 | -1 | 7  | 13.51  | 1.22  |
| -4 | -1 | 7  | 15.46  | 1.52  |
| -4 | -1 | 8  | 2.16   | 0.95  |
| -4 | -1 | 8  | 1.48   | 0.85  |
| -4 | -1 | 8  | 3.01   | 1.00  |
| -4 | -1 | 8  | 1.65   | 0.94  |
| -4 | -1 | 8  | 1.96   | 0.94  |
| -4 | -1 | 8  | 1.66   | 0.90  |
| -4 | -1 | 8  | 1.56   | 0.94  |
| -4 | -1 | 8  | 1.81   | 0.75  |
| -4 | -1 | 9  | 228.11 | 5.88  |
| -4 | -1 | 9  | 222.65 | 5.05  |
| -4 | -1 | 9  | 190.84 | 5.60  |
| -4 | -1 | 9  | 186.49 | 5.15  |
| -4 | -1 | 9  | 236.33 | 6.07  |
| -4 | -1 | 9  | 227.50 | 5.63  |
| -4 | -1 | 9  | 232.18 | 5.36  |
| -4 | -1 | 9  | 221.37 | 5.97  |
| -4 | -1 | 10 | 53.98  | 3.04  |
| -4 | -1 | 10 | 58.52  | 3.29  |
| -4 | -1 | 10 | 55.03  | 2.84  |
| -4 | -1 | 10 | 54.23  | 3.03  |
| -4 | -1 | 10 | 52.78  | 2.76  |
| -4 | -1 | 10 | 56.49  | 3.13  |
| -4 | -1 | 10 | 54.84  | 3.25  |
| -4 | -1 | 10 | 57.24  | 2.91  |
| -4 | -1 | 10 | 60.39  | 3.03  |
| -4 | -1 | 10 | 51.69  | 2.40  |
| -4 | -1 | 11 | 656.51 | 9.78  |
| -4 | -1 | 11 | 738.14 | 11.40 |
| -4 | -1 | 11 | 645.05 | 11.54 |
| -4 | -1 | 11 | 612.61 | 10.83 |
| -4 | -1 | 11 | 599.89 | 10.26 |
| -4 | -1 | 11 | 657.01 | 10.77 |
| -4 | -1 | 11 | 675.40 | 11.54 |
| -4 | -1 | 11 | 678.55 | 11.55 |
| -4 | -1 | 11 | 639.34 | 11.82 |
| -4 | -1 | 12 | 35.94  | 2.53  |
| -4 | -1 | 12 | 43.44  | 2.57  |
| -4 | -1 | 12 | 45.57  | 3.06  |

## CIF 31

|    |    |     |        |      |
|----|----|-----|--------|------|
| -4 | -1 | 12  | 47.17  | 2.75 |
| -4 | -1 | 12  | 40.45  | 2.17 |
| -4 | -1 | 12  | 39.38  | 2.70 |
| -4 | -1 | 12  | 41.39  | 2.51 |
| -4 | -1 | 12  | 39.61  | 2.90 |
| -4 | -1 | 12  | 40.64  | 2.70 |
| -4 | -1 | 13  | 56.60  | 3.21 |
| -4 | -1 | 13  | 60.10  | 3.03 |
| -4 | -1 | 13  | 58.98  | 2.94 |
| -4 | -1 | 13  | 55.75  | 3.18 |
| -4 | -1 | 13  | 52.58  | 2.65 |
| -4 | -1 | 13  | 54.34  | 2.86 |
| -4 | -1 | 13  | 57.47  | 2.87 |
| -4 | -1 | 13  | 48.82  | 2.34 |
| -4 | -1 | 13  | 55.99  | 2.97 |
| -4 | -1 | 14  | 483.70 | 8.71 |
| -4 | -1 | 14  | 419.59 | 7.20 |
| -4 | -1 | 14  | 418.71 | 7.62 |
| -4 | -1 | 14  | 469.32 | 8.09 |
| -4 | -1 | 14  | 446.48 | 8.40 |
| -4 | -1 | 14  | 405.92 | 7.13 |
| -4 | -1 | 14  | 466.39 | 8.75 |
| -4 | -1 | 14  | 440.89 | 8.61 |
| -4 | -1 | 14  | 481.34 | 8.73 |
| -4 | -1 | 15  | 11.24  | 1.25 |
| -4 | -1 | 15  | 8.29   | 1.16 |
| -4 | -1 | 15  | 7.72   | 1.16 |
| -4 | -1 | 15  | 10.79  | 1.30 |
| -4 | -1 | 15  | 10.48  | 1.16 |
| -4 | -1 | 15  | 10.52  | 1.27 |
| -4 | -1 | 16  | 80.96  | 2.22 |
| -4 | -1 | 16  | 75.56  | 2.13 |
| -4 | -1 | 16  | 76.93  | 2.22 |
| -4 | 0  | -12 | 3.00   | 2.70 |
| -4 | 0  | -12 | 3.57   | 0.58 |
| -4 | 0  | -12 | 1.29   | 1.04 |
| -4 | 0  | -11 | 20.55  | 1.42 |
| -4 | 0  | -11 | 21.26  | 2.68 |
| -4 | 0  | -11 | 19.98  | 1.87 |
| -4 | 0  | -11 | 22.99  | 5.49 |
| -4 | 0  | -10 | 46.26  | 3.07 |

## CIF 31

|    |   |     |        |      |
|----|---|-----|--------|------|
| -4 | 0 | -10 | 72.57  | 3.32 |
| -4 | 0 | -10 | 42.78  | 2.15 |
| -4 | 0 | -10 | 63.96  | 2.41 |
| -4 | 0 | -10 | 64.34  | 2.51 |
| -4 | 0 | -10 | 69.96  | 2.84 |
| -4 | 0 | -10 | 48.56  | 5.31 |
| -4 | 0 | -10 | 68.08  | 5.99 |
| -4 | 0 | -9  | 35.43  | 3.33 |
| -4 | 0 | -9  | 23.11  | 1.79 |
| -4 | 0 | -9  | 33.05  | 4.17 |
| -4 | 0 | -9  | 32.28  | 2.01 |
| -4 | 0 | -9  | 30.35  | 2.05 |
| -4 | 0 | -9  | 24.38  | 2.61 |
| -4 | 0 | -9  | 29.31  | 1.84 |
| -4 | 0 | -9  | 33.26  | 2.31 |
| -4 | 0 | -9  | 31.90  | 2.16 |
| -4 | 0 | -9  | 26.11  | 3.41 |
| -4 | 0 | -9  | 35.28  | 4.80 |
| -4 | 0 | -8  | 292.62 | 6.59 |
| -4 | 0 | -8  | 304.39 | 6.96 |
| -4 | 0 | -8  | 296.13 | 6.29 |
| -4 | 0 | -8  | 290.46 | 6.99 |
| -4 | 0 | -8  | 289.85 | 6.18 |
| -4 | 0 | -8  | 307.38 | 6.87 |
| -4 | 0 | -8  | 306.68 | 6.59 |
| -4 | 0 | -8  | 288.26 | 5.93 |
| -4 | 0 | -8  | 287.94 | 6.29 |
| -4 | 0 | -7  | 114.48 | 3.99 |
| -4 | 0 | -7  | 109.06 | 4.08 |
| -4 | 0 | -7  | 115.33 | 3.87 |
| -4 | 0 | -7  | 108.12 | 3.60 |
| -4 | 0 | -7  | 106.43 | 3.71 |
| -4 | 0 | -7  | 112.86 | 4.03 |
| -4 | 0 | -7  | 108.18 | 4.08 |
| -4 | 0 | -7  | 106.76 | 3.72 |
| -4 | 0 | -7  | 105.15 | 3.74 |
| -4 | 0 | -7  | 111.73 | 3.83 |
| -4 | 0 | -6  | 107.95 | 3.77 |
| -4 | 0 | -6  | 115.66 | 3.76 |
| -4 | 0 | -6  | 116.30 | 3.73 |
| -4 | 0 | -6  | 104.21 | 3.49 |

## CIF 31

|    |   |    |         |       |
|----|---|----|---------|-------|
| -4 | 0 | -6 | 103.07  | 4.51  |
| -4 | 0 | -6 | 109.17  | 3.56  |
| -4 | 0 | -6 | 109.41  | 3.68  |
| -4 | 0 | -6 | 104.67  | 3.76  |
| -4 | 0 | -6 | 111.29  | 3.96  |
| -4 | 0 | -6 | 110.13  | 3.72  |
| -4 | 0 | -5 | 0.34    | 0.80  |
| -4 | 0 | -5 | 1.65    | 0.80  |
| -4 | 0 | -5 | 0.96    | 0.78  |
| -4 | 0 | -5 | 0.53    | 0.69  |
| -4 | 0 | -5 | 2.00    | 0.74  |
| -4 | 0 | -5 | 0.79    | 1.04  |
| -4 | 0 | -5 | 0.03    | 0.68  |
| -4 | 0 | -5 | 0.32    | 0.78  |
| -4 | 0 | -5 | 0.31    | 0.73  |
| -4 | 0 | -5 | 0.27    | 0.67  |
| -4 | 0 | -4 | 49.95   | 2.30  |
| -4 | 0 | -4 | 45.90   | 1.94  |
| -4 | 0 | -4 | 50.76   | 2.20  |
| -4 | 0 | -4 | 45.11   | 2.18  |
| -4 | 0 | -4 | 47.22   | 2.11  |
| -4 | 0 | -4 | 50.25   | 2.27  |
| -4 | 0 | -4 | 51.87   | 2.24  |
| -4 | 0 | -4 | 47.05   | 2.74  |
| -4 | 0 | -4 | 49.44   | 2.20  |
| -4 | 0 | -4 | 45.76   | 2.21  |
| -4 | 0 | -4 | 47.96   | 2.04  |
| -4 | 0 | -4 | 44.95   | 2.62  |
| -4 | 0 | -3 | 102.75  | 3.05  |
| -4 | 0 | -3 | 106.69  | 3.69  |
| -4 | 0 | -3 | 101.03  | 3.76  |
| -4 | 0 | -3 | 101.08  | 2.95  |
| -4 | 0 | -3 | 102.95  | 2.93  |
| -4 | 0 | -3 | 97.05   | 2.92  |
| -4 | 0 | -2 | 133.23  | 3.90  |
| -4 | 0 | -2 | 134.55  | 3.97  |
| -4 | 0 | -1 | 1685.89 | 18.54 |
| -4 | 0 | 0  | 501.70  | 6.64  |
| -4 | 0 | 0  | 498.21  | 7.17  |
| -4 | 0 | 0  | 520.48  | 6.56  |
| -4 | 0 | 0  | 501.54  | 7.86  |



## CIF 31

|    |   |   |         |       |
|----|---|---|---------|-------|
| -4 | 0 | 0 | 491.80  | 7.91  |
| -4 | 0 | 1 | 1136.93 | 12.12 |
| -4 | 0 | 1 | 1157.66 | 11.44 |
| -4 | 0 | 1 | 1183.05 | 12.97 |
| -4 | 0 | 1 | 1140.19 | 12.09 |
| -4 | 0 | 1 | 1114.56 | 13.46 |
| -4 | 0 | 1 | 1237.56 | 13.96 |
| -4 | 0 | 1 | 1204.67 | 12.54 |
| -4 | 0 | 1 | 1171.19 | 12.25 |
| -4 | 0 | 2 | 6346.29 | 54.27 |
| -4 | 0 | 2 | 6307.40 | 53.96 |
| -4 | 0 | 2 | 6205.45 | 53.11 |
| -4 | 0 | 2 | 6257.27 | 55.38 |
| -4 | 0 | 2 | 6220.98 | 53.85 |
| -4 | 0 | 2 | 6378.12 | 54.06 |
| -4 | 0 | 3 | 8.81    | 0.89  |
| -4 | 0 | 3 | 9.07    | 0.87  |
| -4 | 0 | 3 | 10.42   | 0.91  |
| -4 | 0 | 3 | 6.62    | 0.99  |
| -4 | 0 | 3 | 11.65   | 0.97  |
| -4 | 0 | 3 | 11.36   | 0.82  |
| -4 | 0 | 3 | 10.17   | 0.44  |
| -4 | 0 | 3 | 9.31    | 1.00  |
| -4 | 0 | 3 | 8.18    | 0.88  |
| -4 | 0 | 3 | 10.73   | 0.98  |
| -4 | 0 | 3 | 10.10   | 1.10  |
| -4 | 0 | 4 | 2811.98 | 26.74 |
| -4 | 0 | 4 | 2659.50 | 25.47 |
| -4 | 0 | 4 | 2792.27 | 26.20 |
| -4 | 0 | 4 | 2710.94 | 26.28 |
| -4 | 0 | 4 | 2770.69 | 27.17 |
| -4 | 0 | 4 | 3034.50 | 27.30 |
| -4 | 0 | 4 | 3042.11 | 27.39 |
| -4 | 0 | 4 | 2579.01 | 25.95 |
| -4 | 0 | 4 | 2924.17 | 26.69 |
| -4 | 0 | 4 | 2767.56 | 24.09 |
| -4 | 0 | 4 | 3148.04 | 26.48 |
| -4 | 0 | 4 | 2736.41 | 26.97 |
| -4 | 0 | 5 | 383.01  | 6.34  |
| -4 | 0 | 5 | 419.38  | 6.73  |
| -4 | 0 | 5 | 393.50  | 6.59  |

## CIF 31

|    |   |   |         |       |
|----|---|---|---------|-------|
| -4 | 0 | 5 | 363.42  | 6.41  |
| -4 | 0 | 5 | 398.49  | 6.69  |
| -4 | 0 | 5 | 386.77  | 6.10  |
| -4 | 0 | 5 | 372.44  | 6.56  |
| -4 | 0 | 5 | 398.29  | 6.01  |
| -4 | 0 | 5 | 426.35  | 6.00  |
| -4 | 0 | 5 | 395.64  | 4.95  |
| -4 | 0 | 5 | 415.71  | 6.57  |
| -4 | 0 | 5 | 402.91  | 6.44  |
| -4 | 0 | 6 | 4438.97 | 41.67 |
| -4 | 0 | 6 | 4636.70 | 41.93 |
| -4 | 0 | 6 | 4481.59 | 40.71 |
| -4 | 0 | 6 | 4735.39 | 41.69 |
| -4 | 0 | 6 | 4140.52 | 40.70 |
| -4 | 0 | 6 | 4862.83 | 42.01 |
| -4 | 0 | 6 | 4138.49 | 40.03 |
| -4 | 0 | 6 | 4535.81 | 40.41 |
| -4 | 0 | 6 | 4475.88 | 41.66 |
| -4 | 0 | 6 | 4702.76 | 39.11 |
| -4 | 0 | 7 | 9.78    | 1.23  |
| -4 | 0 | 7 | 5.73    | 1.12  |
| -4 | 0 | 7 | 11.48   | 1.33  |
| -4 | 0 | 7 | 11.54   | 1.42  |
| -4 | 0 | 7 | 8.67    | 1.10  |
| -4 | 0 | 7 | 6.30    | 1.03  |
| -4 | 0 | 7 | 10.26   | 1.29  |
| -4 | 0 | 7 | 12.28   | 1.18  |
| -4 | 0 | 7 | 7.69    | 1.30  |
| -4 | 0 | 7 | 10.70   | 1.22  |
| -4 | 0 | 7 | 11.03   | 0.90  |
| -4 | 0 | 7 | 9.45    | 1.02  |
| -4 | 0 | 7 | 7.97    | 0.94  |
| -4 | 0 | 7 | 9.83    | 1.20  |
| -4 | 0 | 8 | 177.60  | 4.87  |
| -4 | 0 | 8 | 179.60  | 4.99  |
| -4 | 0 | 8 | 190.58  | 5.25  |
| -4 | 0 | 8 | 170.37  | 4.58  |
| -4 | 0 | 8 | 193.31  | 4.75  |
| -4 | 0 | 8 | 176.27  | 4.66  |
| -4 | 0 | 8 | 183.81  | 4.61  |
| -4 | 0 | 8 | 191.05  | 4.80  |

## CIF 31

|    |   |    |        |       |
|----|---|----|--------|-------|
| -4 | 0 | 8  | 183.35 | 5.16  |
| -4 | 0 | 8  | 188.62 | 4.59  |
| -4 | 0 | 8  | 187.10 | 5.24  |
| -4 | 0 | 8  | 188.83 | 4.04  |
| -4 | 0 | 8  | 170.18 | 3.98  |
| -4 | 0 | 9  | 4.14   | 1.05  |
| -4 | 0 | 9  | 2.96   | 1.04  |
| -4 | 0 | 9  | 5.83   | 1.05  |
| -4 | 0 | 9  | 3.68   | 1.00  |
| -4 | 0 | 9  | 3.25   | 1.04  |
| -4 | 0 | 9  | 3.63   | 1.25  |
| -4 | 0 | 9  | 5.55   | 1.17  |
| -4 | 0 | 9  | 3.14   | 0.76  |
| -4 | 0 | 9  | 3.06   | 1.27  |
| -4 | 0 | 9  | 3.21   | 0.72  |
| -4 | 0 | 10 | 223.59 | 5.10  |
| -4 | 0 | 10 | 222.07 | 6.41  |
| -4 | 0 | 10 | 240.43 | 6.33  |
| -4 | 0 | 10 | 217.98 | 5.59  |
| -4 | 0 | 10 | 228.76 | 5.80  |
| -4 | 0 | 10 | 226.63 | 6.01  |
| -4 | 0 | 10 | 232.52 | 5.78  |
| -4 | 0 | 10 | 222.08 | 5.51  |
| -4 | 0 | 10 | 214.41 | 6.26  |
| -4 | 0 | 11 | 795.68 | 13.34 |
| -4 | 0 | 11 | 809.02 | 13.61 |
| -4 | 0 | 11 | 811.71 | 13.10 |
| -4 | 0 | 11 | 882.66 | 12.87 |
| -4 | 0 | 11 | 792.66 | 12.23 |
| -4 | 0 | 11 | 785.22 | 11.93 |
| -4 | 0 | 11 | 755.01 | 12.90 |
| -4 | 0 | 11 | 863.41 | 11.70 |
| -4 | 0 | 11 | 741.89 | 12.21 |
| -4 | 0 | 12 | 127.22 | 4.34  |
| -4 | 0 | 12 | 125.36 | 5.02  |
| -4 | 0 | 12 | 123.50 | 4.61  |
| -4 | 0 | 12 | 122.24 | 4.10  |
| -4 | 0 | 12 | 117.56 | 4.22  |
| -4 | 0 | 12 | 114.35 | 4.56  |
| -4 | 0 | 12 | 126.63 | 3.97  |
| -4 | 0 | 12 | 129.35 | 4.73  |

## CIF 31

|    |   |     |        |      |
|----|---|-----|--------|------|
| -4 | 0 | 13  | 302.91 | 7.13 |
| -4 | 0 | 13  | 298.62 | 7.45 |
| -4 | 0 | 13  | 307.46 | 6.96 |
| -4 | 0 | 13  | 291.88 | 6.41 |
| -4 | 0 | 13  | 319.44 | 6.28 |
| -4 | 0 | 13  | 296.18 | 6.70 |
| -4 | 0 | 13  | 277.79 | 6.94 |
| -4 | 0 | 13  | 306.91 | 6.29 |
| -4 | 0 | 13  | 296.23 | 7.43 |
| -4 | 0 | 14  | 7.29   | 1.15 |
| -4 | 0 | 14  | 8.11   | 1.29 |
| -4 | 0 | 14  | 8.31   | 1.33 |
| -4 | 0 | 14  | 7.09   | 1.33 |
| -4 | 0 | 14  | 7.98   | 1.12 |
| -4 | 0 | 15  | 279.97 | 5.45 |
| -4 | 0 | 15  | 268.87 | 5.52 |
| -4 | 0 | 15  | 271.75 | 5.38 |
| -4 | 0 | 15  | 287.28 | 5.64 |
| -4 | 1 | -12 | 3.95   | 1.30 |
| -4 | 1 | -12 | 4.26   | 1.86 |
| -4 | 1 | -12 | 4.42   | 0.72 |
| -4 | 1 | -12 | 4.19   | 4.20 |
| -4 | 1 | -11 | 19.30  | 3.41 |
| -4 | 1 | -11 | 17.82  | 1.91 |
| -4 | 1 | -11 | 19.56  | 1.82 |
| -4 | 1 | -11 | 20.31  | 1.50 |
| -4 | 1 | -11 | 19.94  | 4.64 |
| -4 | 1 | -10 | 355.85 | 7.72 |
| -4 | 1 | -10 | 361.65 | 7.94 |
| -4 | 1 | -10 | 327.28 | 6.64 |
| -4 | 1 | -10 | 330.64 | 8.36 |
| -4 | 1 | -10 | 347.63 | 5.95 |
| -4 | 1 | -10 | 368.24 | 8.70 |
| -4 | 1 | -10 | 356.58 | 7.18 |
| -4 | 1 | -10 | 375.38 | 6.96 |
| -4 | 1 | -10 | 390.37 | 9.52 |
| -4 | 1 | -10 | 363.03 | 6.69 |
| -4 | 1 | -9  | 352.55 | 8.82 |
| -4 | 1 | -9  | 359.27 | 8.93 |
| -4 | 1 | -9  | 299.54 | 6.68 |
| -4 | 1 | -9  | 322.98 | 6.17 |

## CIF 31

|    |   |    |        |      |
|----|---|----|--------|------|
| -4 | 1 | -9 | 329.06 | 6.26 |
| -4 | 1 | -9 | 335.27 | 7.46 |
| -4 | 1 | -9 | 325.66 | 7.13 |
| -4 | 1 | -9 | 331.49 | 6.87 |
| -4 | 1 | -9 | 341.39 | 7.13 |
| -4 | 1 | -9 | 322.19 | 7.67 |
| -4 | 1 | -9 | 317.57 | 6.76 |
| -4 | 1 | -8 | 13.93  | 1.84 |
| -4 | 1 | -8 | 13.90  | 1.58 |
| -4 | 1 | -8 | 16.61  | 1.52 |
| -4 | 1 | -8 | 13.52  | 1.79 |
| -4 | 1 | -8 | 14.31  | 1.70 |
| -4 | 1 | -8 | 14.43  | 1.66 |
| -4 | 1 | -8 | 14.10  | 2.18 |
| -4 | 1 | -8 | 15.74  | 1.46 |
| -4 | 1 | -8 | 15.05  | 1.48 |
| -4 | 1 | -8 | 14.77  | 1.55 |
| -4 | 1 | -7 | 428.03 | 8.00 |
| -4 | 1 | -7 | 425.94 | 8.33 |
| -4 | 1 | -7 | 428.97 | 7.76 |
| -4 | 1 | -7 | 407.66 | 8.27 |
| -4 | 1 | -7 | 435.14 | 7.52 |
| -4 | 1 | -7 | 390.18 | 7.62 |
| -4 | 1 | -7 | 419.75 | 7.53 |
| -4 | 1 | -7 | 413.57 | 8.05 |
| -4 | 1 | -7 | 403.54 | 7.36 |
| -4 | 1 | -7 | 455.99 | 9.89 |
| -4 | 1 | -7 | 407.63 | 7.68 |
| -4 | 1 | -6 | 200.33 | 5.02 |
| -4 | 1 | -6 | 184.64 | 4.61 |
| -4 | 1 | -6 | 199.42 | 4.84 |
| -4 | 1 | -6 | 188.46 | 5.05 |
| -4 | 1 | -6 | 197.42 | 4.66 |
| -4 | 1 | -6 | 200.29 | 5.24 |
| -4 | 1 | -6 | 190.05 | 4.73 |
| -4 | 1 | -6 | 194.31 | 4.94 |
| -4 | 1 | -5 | 36.11  | 2.01 |
| -4 | 1 | -5 | 33.15  | 2.00 |
| -4 | 1 | -5 | 36.89  | 1.94 |
| -4 | 1 | -5 | 37.24  | 1.98 |
| -4 | 1 | -5 | 34.63  | 1.84 |

## CIF 31

|    |   |    |         |       |
|----|---|----|---------|-------|
| -4 | 1 | -5 | 35.32   | 1.97  |
| -4 | 1 | -5 | 34.60   | 1.81  |
| -4 | 1 | -5 | 38.97   | 1.99  |
| -4 | 1 | -5 | 37.59   | 1.98  |
| -4 | 1 | -5 | 36.48   | 1.94  |
| -4 | 1 | -4 | 46.47   | 2.13  |
| -4 | 1 | -4 | 47.02   | 2.06  |
| -4 | 1 | -4 | 51.49   | 2.82  |
| -4 | 1 | -4 | 43.78   | 1.91  |
| -4 | 1 | -4 | 43.64   | 1.94  |
| -4 | 1 | -4 | 43.57   | 2.01  |
| -4 | 1 | -4 | 45.24   | 1.96  |
| -4 | 1 | -4 | 42.50   | 2.03  |
| -4 | 1 | -4 | 43.30   | 1.92  |
| -4 | 1 | -4 | 46.13   | 1.99  |
| -4 | 1 | -4 | 43.80   | 2.01  |
| -4 | 1 | -3 | 135.93  | 4.28  |
| -4 | 1 | -2 | 45.44   | 1.15  |
| -4 | 1 | -1 | 432.75  | 6.76  |
| -4 | 1 | -1 | 429.17  | 6.95  |
| -4 | 1 | 0  | 227.65  | 4.62  |
| -4 | 1 | 0  | 249.84  | 4.93  |
| -4 | 1 | 0  | 245.99  | 3.82  |
| -4 | 1 | 0  | 240.56  | 4.04  |
| -4 | 1 | 0  | 245.62  | 3.67  |
| -4 | 1 | 0  | 244.06  | 4.19  |
| -4 | 1 | 0  | 232.15  | 4.78  |
| -4 | 1 | 1  | 1089.31 | 11.12 |
| -4 | 1 | 1  | 1111.61 | 10.98 |
| -4 | 1 | 1  | 1082.91 | 12.51 |
| -4 | 1 | 1  | 1074.07 | 11.52 |
| -4 | 1 | 1  | 1075.82 | 12.58 |
| -4 | 1 | 1  | 1076.18 | 11.52 |
| -4 | 1 | 1  | 1115.96 | 11.76 |
| -4 | 1 | 1  | 1061.84 | 12.53 |
| -4 | 1 | 1  | 1087.30 | 9.92  |
| -4 | 1 | 2  | 210.52  | 3.58  |
| -4 | 1 | 2  | 206.66  | 3.85  |
| -4 | 1 | 2  | 218.87  | 3.87  |
| -4 | 1 | 2  | 227.42  | 4.37  |
| -4 | 1 | 2  | 233.48  | 3.69  |

## CIF 31

|    |   |   |        |      |
|----|---|---|--------|------|
| -4 | 1 | 2 | 208.24 | 2.81 |
| -4 | 1 | 2 | 231.54 | 4.61 |
| -4 | 1 | 2 | 230.62 | 4.14 |
| -4 | 1 | 2 | 224.67 | 3.88 |
| -4 | 1 | 3 | 5.78   | 0.74 |
| -4 | 1 | 3 | 4.28   | 0.66 |
| -4 | 1 | 3 | 3.98   | 0.68 |
| -4 | 1 | 3 | 6.26   | 0.88 |
| -4 | 1 | 3 | 5.18   | 0.45 |
| -4 | 1 | 3 | 6.54   | 0.86 |
| -4 | 1 | 3 | 6.60   | 0.76 |
| -4 | 1 | 3 | 6.13   | 0.76 |
| -4 | 1 | 4 | 511.14 | 7.22 |
| -4 | 1 | 4 | 489.58 | 6.83 |
| -4 | 1 | 4 | 507.86 | 7.55 |
| -4 | 1 | 4 | 538.43 | 7.21 |
| -4 | 1 | 4 | 527.78 | 7.76 |
| -4 | 1 | 4 | 507.86 | 7.43 |
| -4 | 1 | 4 | 545.10 | 6.93 |
| -4 | 1 | 4 | 481.83 | 7.38 |
| -4 | 1 | 4 | 521.86 | 5.94 |
| -4 | 1 | 4 | 513.71 | 6.72 |
| -4 | 1 | 4 | 530.02 | 7.58 |
| -4 | 1 | 5 | 37.43  | 1.95 |
| -4 | 1 | 5 | 40.90  | 1.84 |
| -4 | 1 | 5 | 40.28  | 1.73 |
| -4 | 1 | 5 | 39.85  | 1.88 |
| -4 | 1 | 5 | 35.17  | 1.91 |
| -4 | 1 | 5 | 36.72  | 1.74 |
| -4 | 1 | 5 | 37.60  | 1.91 |
| -4 | 1 | 5 | 39.46  | 2.05 |
| -4 | 1 | 5 | 38.84  | 1.40 |
| -4 | 1 | 5 | 44.62  | 1.68 |
| -4 | 1 | 5 | 39.32  | 1.74 |
| -4 | 1 | 5 | 33.85  | 1.75 |
| -4 | 1 | 6 | 32.34  | 1.97 |
| -4 | 1 | 6 | 28.33  | 1.84 |
| -4 | 1 | 6 | 32.77  | 1.77 |
| -4 | 1 | 6 | 30.08  | 1.94 |
| -4 | 1 | 6 | 39.39  | 1.85 |
| -4 | 1 | 6 | 42.43  | 1.86 |

## CIF 31

|    |   |    |        |      |
|----|---|----|--------|------|
| -4 | 1 | 6  | 39.49  | 1.88 |
| -4 | 1 | 6  | 32.38  | 1.61 |
| -4 | 1 | 6  | 27.82  | 1.81 |
| -4 | 1 | 6  | 39.87  | 1.56 |
| -4 | 1 | 6  | 30.30  | 1.83 |
| -4 | 1 | 6  | 44.25  | 1.69 |
| -4 | 1 | 6  | 39.24  | 2.10 |
| -4 | 1 | 7  | 3.57   | 0.85 |
| -4 | 1 | 7  | 6.94   | 1.15 |
| -4 | 1 | 7  | 4.55   | 1.04 |
| -4 | 1 | 7  | 7.67   | 1.14 |
| -4 | 1 | 7  | 4.47   | 0.91 |
| -4 | 1 | 7  | 5.94   | 0.96 |
| -4 | 1 | 7  | 6.14   | 1.21 |
| -4 | 1 | 7  | 8.04   | 1.15 |
| -4 | 1 | 7  | 3.75   | 0.67 |
| -4 | 1 | 7  | 4.64   | 0.67 |
| -4 | 1 | 7  | 5.77   | 0.91 |
| -4 | 1 | 7  | 3.90   | 1.00 |
| -4 | 1 | 8  | 286.27 | 7.08 |
| -4 | 1 | 8  | 393.45 | 7.78 |
| -4 | 1 | 8  | 376.04 | 7.37 |
| -4 | 1 | 8  | 396.90 | 6.94 |
| -4 | 1 | 8  | 376.12 | 7.19 |
| -4 | 1 | 8  | 375.41 | 6.90 |
| -4 | 1 | 8  | 322.73 | 6.50 |
| -4 | 1 | 8  | 344.32 | 7.10 |
| -4 | 1 | 8  | 409.72 | 8.02 |
| -4 | 1 | 8  | 378.45 | 6.27 |
| -4 | 1 | 8  | 368.54 | 6.51 |
| -4 | 1 | 9  | 180.40 | 5.11 |
| -4 | 1 | 9  | 166.92 | 4.96 |
| -4 | 1 | 9  | 174.26 | 4.87 |
| -4 | 1 | 9  | 183.96 | 4.87 |
| -4 | 1 | 9  | 177.81 | 5.40 |
| -4 | 1 | 9  | 183.83 | 5.55 |
| -4 | 1 | 9  | 177.08 | 5.54 |
| -4 | 1 | 9  | 183.82 | 4.53 |
| -4 | 1 | 10 | 366.32 | 8.66 |
| -4 | 1 | 10 | 381.26 | 7.87 |
| -4 | 1 | 10 | 396.19 | 8.01 |



## CIF 31

|    |   |     |        |      |
|----|---|-----|--------|------|
| -4 | 1 | 10  | 388.29 | 7.66 |
| -4 | 1 | 10  | 360.67 | 8.21 |
| -4 | 1 | 10  | 422.49 | 7.65 |
| -4 | 1 | 10  | 412.70 | 7.62 |
| -4 | 1 | 10  | 378.23 | 8.73 |
| -4 | 1 | 11  | 207.61 | 5.59 |
| -4 | 1 | 11  | 220.37 | 6.31 |
| -4 | 1 | 11  | 216.49 | 5.31 |
| -4 | 1 | 11  | 206.38 | 6.25 |
| -4 | 1 | 11  | 222.26 | 5.68 |
| -4 | 1 | 11  | 207.05 | 6.54 |
| -4 | 1 | 11  | 218.07 | 6.58 |
| -4 | 1 | 11  | 215.81 | 5.35 |
| -4 | 1 | 12  | 137.64 | 4.95 |
| -4 | 1 | 12  | 139.79 | 4.61 |
| -4 | 1 | 12  | 133.93 | 4.27 |
| -4 | 1 | 12  | 146.86 | 5.38 |
| -4 | 1 | 12  | 143.48 | 5.16 |
| -4 | 1 | 12  | 155.25 | 4.99 |
| -4 | 1 | 12  | 155.10 | 4.51 |
| -4 | 1 | 12  | 140.86 | 5.27 |
| -4 | 1 | 13  | 6.82   | 1.33 |
| -4 | 1 | 13  | 6.51   | 1.43 |
| -4 | 1 | 13  | 6.29   | 1.29 |
| -4 | 1 | 13  | 6.12   | 1.14 |
| -4 | 1 | 13  | 7.16   | 1.37 |
| -4 | 1 | 13  | 6.08   | 1.12 |
| -4 | 1 | 13  | 6.51   | 1.06 |
| -4 | 1 | 14  | 47.77  | 2.39 |
| -4 | 1 | 14  | 52.46  | 2.63 |
| -4 | 1 | 14  | 46.09  | 2.66 |
| -4 | 1 | 15  | 14.06  | 1.25 |
| -4 | 1 | 15  | 13.49  | 1.26 |
| -4 | 1 | 15  | 12.31  | 1.08 |
| -4 | 2 | -13 | 235.09 | 5.14 |
| -4 | 2 | -13 | 256.90 | 3.36 |
| -4 | 2 | -12 | 19.53  | 2.39 |
| -4 | 2 | -12 | 22.45  | 2.89 |
| -4 | 2 | -12 | 19.15  | 1.54 |
| -4 | 2 | -12 | 23.64  | 1.36 |
| -4 | 2 | -11 | 452.17 | 9.19 |

## CIF 31

|    |   |     |        |       |
|----|---|-----|--------|-------|
| -4 | 2 | -11 | 399.92 | 7.34  |
| -4 | 2 | -11 | 499.04 | 9.69  |
| -4 | 2 | -11 | 577.31 | 8.86  |
| -4 | 2 | -11 | 583.68 | 8.24  |
| -4 | 2 | -10 | 205.39 | 6.41  |
| -4 | 2 | -10 | 196.57 | 5.62  |
| -4 | 2 | -10 | 206.55 | 5.47  |
| -4 | 2 | -10 | 186.71 | 5.03  |
| -4 | 2 | -10 | 219.86 | 5.23  |
| -4 | 2 | -10 | 215.53 | 6.44  |
| -4 | 2 | -10 | 195.57 | 4.89  |
| -4 | 2 | -10 | 216.76 | 7.23  |
| -4 | 2 | -9  | 171.71 | 5.36  |
| -4 | 2 | -9  | 170.32 | 4.72  |
| -4 | 2 | -9  | 154.54 | 5.79  |
| -4 | 2 | -9  | 164.58 | 5.24  |
| -4 | 2 | -9  | 177.02 | 5.21  |
| -4 | 2 | -9  | 168.10 | 4.43  |
| -4 | 2 | -9  | 168.61 | 4.84  |
| -4 | 2 | -8  | 636.21 | 10.89 |
| -4 | 2 | -8  | 630.83 | 9.57  |
| -4 | 2 | -8  | 585.54 | 10.17 |
| -4 | 2 | -8  | 621.70 | 10.20 |
| -4 | 2 | -8  | 651.74 | 10.11 |
| -4 | 2 | -8  | 611.57 | 10.78 |
| -4 | 2 | -8  | 641.23 | 10.38 |
| -4 | 2 | -8  | 661.15 | 10.44 |
| -4 | 2 | -8  | 638.25 | 9.84  |
| -4 | 2 | -8  | 660.88 | 12.53 |
| -4 | 2 | -8  | 649.05 | 10.76 |
| -4 | 2 | -7  | 67.06  | 2.94  |
| -4 | 2 | -7  | 68.36  | 3.22  |
| -4 | 2 | -7  | 71.83  | 3.29  |
| -4 | 2 | -7  | 57.21  | 2.68  |
| -4 | 2 | -7  | 70.81  | 2.71  |
| -4 | 2 | -7  | 69.81  | 2.63  |
| -4 | 2 | -7  | 69.25  | 2.87  |
| -4 | 2 | -7  | 69.72  | 3.80  |
| -4 | 2 | -7  | 72.61  | 3.05  |
| -4 | 2 | -7  | 71.98  | 2.94  |
| -4 | 2 | -7  | 68.88  | 3.22  |

## CIF 31

|    |   |    |         |       |
|----|---|----|---------|-------|
| -4 | 2 | -7 | 64.18   | 3.00  |
| -4 | 2 | -6 | 40.87   | 2.27  |
| -4 | 2 | -6 | 36.25   | 2.29  |
| -4 | 2 | -6 | 41.67   | 1.97  |
| -4 | 2 | -6 | 41.17   | 2.08  |
| -4 | 2 | -6 | 45.13   | 2.92  |
| -4 | 2 | -6 | 39.55   | 2.08  |
| -4 | 2 | -6 | 41.00   | 2.04  |
| -4 | 2 | -6 | 36.49   | 2.14  |
| -4 | 2 | -6 | 40.46   | 2.13  |
| -4 | 2 | -5 | 0.39    | 0.64  |
| -4 | 2 | -5 | 1.20    | 1.06  |
| -4 | 2 | -5 | 0.99    | 0.79  |
| -4 | 2 | -5 | 1.89    | 0.72  |
| -4 | 2 | -5 | 0.31    | 0.61  |
| -4 | 2 | -5 | 0.21    | 0.56  |
| -4 | 2 | -5 | 0.03    | 0.54  |
| -4 | 2 | -5 | 0.44    | 0.67  |
| -4 | 2 | -5 | 2.08    | 0.65  |
| -4 | 2 | -5 | 2.61    | 0.68  |
| -4 | 2 | -5 | 1.26    | 0.66  |
| -4 | 2 | -4 | 31.06   | 2.23  |
| -4 | 2 | -4 | 28.57   | 1.58  |
| -4 | 2 | -4 | 30.57   | 1.68  |
| -4 | 2 | -4 | 28.70   | 1.19  |
| -4 | 2 | -4 | 30.10   | 1.67  |
| -4 | 2 | -4 | 27.24   | 1.65  |
| -4 | 2 | -4 | 30.72   | 1.62  |
| -4 | 2 | -3 | 3.87    | 1.01  |
| -4 | 2 | -3 | 1.55    | 0.40  |
| -4 | 2 | -2 | 22.86   | 1.47  |
| -4 | 2 | -2 | 21.42   | 0.93  |
| -4 | 2 | -1 | 643.69  | 9.22  |
| -4 | 2 | -1 | 672.24  | 8.87  |
| -4 | 2 | -1 | 668.21  | 7.56  |
| -4 | 2 | -1 | 658.29  | 7.11  |
| -4 | 2 | -1 | 650.04  | 8.92  |
| -4 | 2 | 0  | 5997.10 | 51.19 |
| -4 | 2 | 0  | 6211.30 | 52.43 |
| -4 | 2 | 0  | 5780.93 | 49.95 |
| -4 | 2 | 0  | 5947.43 | 50.90 |

## CIF 31

|    |   |   |         |       |
|----|---|---|---------|-------|
| -4 | 2 | 0 | 5872.54 | 52.83 |
| -4 | 2 | 0 | 6170.37 | 50.72 |
| -4 | 2 | 0 | 5863.43 | 52.26 |
| -4 | 2 | 1 | 185.70  | 3.62  |
| -4 | 2 | 1 | 199.13  | 4.01  |
| -4 | 2 | 1 | 238.72  | 4.54  |
| -4 | 2 | 1 | 217.67  | 3.72  |
| -4 | 2 | 1 | 207.89  | 3.12  |
| -4 | 2 | 1 | 208.90  | 4.43  |
| -4 | 2 | 1 | 215.85  | 3.69  |
| -4 | 2 | 1 | 223.12  | 3.06  |
| -4 | 2 | 1 | 234.17  | 4.50  |
| -4 | 2 | 2 | 1208.85 | 10.86 |
| -4 | 2 | 2 | 1267.76 | 13.80 |
| -4 | 2 | 2 | 1382.04 | 13.16 |
| -4 | 2 | 2 | 1300.69 | 14.11 |
| -4 | 2 | 2 | 1182.52 | 12.90 |
| -4 | 2 | 2 | 1177.63 | 11.94 |
| -4 | 2 | 2 | 1391.41 | 14.41 |
| -4 | 2 | 2 | 1389.49 | 14.37 |
| -4 | 2 | 2 | 1289.14 | 13.20 |
| -4 | 2 | 2 | 1342.55 | 12.42 |
| -4 | 2 | 3 | 798.22  | 9.05  |
| -4 | 2 | 3 | 740.84  | 7.36  |
| -4 | 2 | 3 | 743.26  | 8.94  |
| -4 | 2 | 3 | 771.37  | 9.93  |
| -4 | 2 | 3 | 774.47  | 9.11  |
| -4 | 2 | 3 | 810.92  | 8.93  |
| -4 | 2 | 3 | 787.61  | 9.74  |
| -4 | 2 | 3 | 796.59  | 9.55  |
| -4 | 2 | 3 | 767.58  | 8.26  |
| -4 | 2 | 3 | 769.39  | 9.94  |
| -4 | 2 | 4 | 1196.20 | 13.63 |
| -4 | 2 | 4 | 1115.74 | 12.29 |
| -4 | 2 | 4 | 1185.00 | 12.35 |
| -4 | 2 | 4 | 1206.69 | 12.68 |
| -4 | 2 | 4 | 1085.95 | 12.31 |
| -4 | 2 | 4 | 1152.20 | 13.06 |
| -4 | 2 | 4 | 1084.42 | 12.58 |
| -4 | 2 | 4 | 1132.48 | 13.18 |
| -4 | 2 | 4 | 1063.98 | 11.51 |

## CIF 31

|    |   |   |         |       |
|----|---|---|---------|-------|
| -4 | 2 | 4 | 1162.99 | 13.34 |
| -4 | 2 | 5 | 1091.81 | 12.65 |
| -4 | 2 | 5 | 1074.43 | 12.06 |
| -4 | 2 | 5 | 1189.14 | 13.68 |
| -4 | 2 | 5 | 936.35  | 11.96 |
| -4 | 2 | 5 | 1076.17 | 12.08 |
| -4 | 2 | 5 | 1190.42 | 13.74 |
| -4 | 2 | 5 | 1130.88 | 12.35 |
| -4 | 2 | 5 | 1100.97 | 11.59 |
| -4 | 2 | 5 | 1074.62 | 13.19 |
| -4 | 2 | 5 | 1071.76 | 12.70 |
| -4 | 2 | 5 | 1052.46 | 11.21 |
| -4 | 2 | 5 | 1040.75 | 12.89 |
| -4 | 2 | 6 | 434.67  | 7.77  |
| -4 | 2 | 6 | 436.26  | 5.73  |
| -4 | 2 | 6 | 448.41  | 7.94  |
| -4 | 2 | 6 | 446.76  | 7.79  |
| -4 | 2 | 6 | 473.71  | 6.83  |
| -4 | 2 | 6 | 405.84  | 7.48  |
| -4 | 2 | 6 | 414.06  | 6.70  |
| -4 | 2 | 6 | 428.63  | 7.41  |
| -4 | 2 | 6 | 442.75  | 6.94  |
| -4 | 2 | 6 | 455.83  | 7.90  |
| -4 | 2 | 6 | 459.26  | 6.50  |
| -4 | 2 | 6 | 438.61  | 7.33  |
| -4 | 2 | 7 | 395.86  | 7.66  |
| -4 | 2 | 7 | 387.55  | 7.45  |
| -4 | 2 | 7 | 415.84  | 7.81  |
| -4 | 2 | 7 | 393.09  | 7.61  |
| -4 | 2 | 7 | 405.28  | 6.57  |
| -4 | 2 | 7 | 362.29  | 7.30  |
| -4 | 2 | 7 | 355.38  | 6.41  |
| -4 | 2 | 7 | 382.77  | 7.73  |
| -4 | 2 | 7 | 383.40  | 6.33  |
| -4 | 2 | 7 | 386.96  | 7.06  |
| -4 | 2 | 8 | 4.60    | 1.09  |
| -4 | 2 | 8 | 3.98    | 1.08  |
| -4 | 2 | 8 | 2.82    | 0.84  |
| -4 | 2 | 8 | 4.00    | 1.10  |
| -4 | 2 | 8 | 3.17    | 0.76  |
| -4 | 2 | 8 | 5.16    | 1.34  |

## CIF 31

|    |   |    |        |       |
|----|---|----|--------|-------|
| -4 | 2 | 8  | 3.98   | 1.00  |
| -4 | 2 | 8  | 3.73   | 0.90  |
| -4 | 2 | 9  | 1.29   | 0.86  |
| -4 | 2 | 9  | 1.90   | 1.28  |
| -4 | 2 | 9  | 1.25   | 0.67  |
| -4 | 2 | 9  | 2.18   | 1.15  |
| -4 | 2 | 9  | 2.16   | 1.10  |
| -4 | 2 | 9  | 1.39   | 0.94  |
| -4 | 2 | 9  | 2.76   | 0.89  |
| -4 | 2 | 9  | 2.04   | 0.80  |
| -4 | 2 | 10 | 0.83   | 0.90  |
| -4 | 2 | 10 | -0.34  | 1.12  |
| -4 | 2 | 10 | -0.04  | 0.83  |
| -4 | 2 | 10 | 2.22   | 1.17  |
| -4 | 2 | 10 | -0.51  | 1.15  |
| -4 | 2 | 10 | 0.32   | 0.74  |
| -4 | 2 | 10 | 0.38   | 0.60  |
| -4 | 2 | 10 | 0.37   | 1.18  |
| -4 | 2 | 10 | 0.41   | 0.76  |
| -4 | 2 | 10 | 0.56   | 1.25  |
| -4 | 2 | 11 | 5.31   | 1.47  |
| -4 | 2 | 11 | 5.42   | 1.26  |
| -4 | 2 | 11 | 2.96   | 0.86  |
| -4 | 2 | 11 | 2.79   | 0.99  |
| -4 | 2 | 11 | 2.69   | 1.14  |
| -4 | 2 | 11 | 4.85   | 1.50  |
| -4 | 2 | 11 | 4.06   | 1.44  |
| -4 | 2 | 11 | 3.11   | 0.93  |
| -4 | 2 | 12 | 474.75 | 9.46  |
| -4 | 2 | 12 | 494.49 | 9.89  |
| -4 | 2 | 12 | 450.43 | 8.48  |
| -4 | 2 | 12 | 521.06 | 9.19  |
| -4 | 2 | 12 | 533.91 | 10.57 |
| -4 | 2 | 12 | 461.28 | 9.91  |
| -4 | 2 | 12 | 492.72 | 8.75  |
| -4 | 2 | 13 | 4.05   | 0.96  |
| -4 | 2 | 13 | 7.62   | 1.41  |
| -4 | 2 | 13 | 5.85   | 1.45  |
| -4 | 2 | 13 | 5.24   | 1.13  |
| -4 | 2 | 13 | 5.61   | 1.38  |
| -4 | 2 | 13 | 4.89   | 1.24  |

## CIF 31

|    |   |     |        |      |
|----|---|-----|--------|------|
| -4 | 2 | 14  | 292.48 | 6.07 |
| -4 | 2 | 14  | 285.87 | 6.23 |
| -4 | 2 | 14  | 274.40 | 6.14 |
| -4 | 2 | 15  | 33.04  | 1.51 |
| -4 | 2 | 15  | 39.65  | 1.79 |
| -4 | 3 | -13 | 5.91   | 2.45 |
| -4 | 3 | -12 | 40.44  | 3.19 |
| -4 | 3 | -12 | 39.46  | 2.51 |
| -4 | 3 | -12 | 32.35  | 1.86 |
| -4 | 3 | -12 | 39.11  | 1.69 |
| -4 | 3 | -11 | 6.19   | 1.05 |
| -4 | 3 | -11 | 8.91   | 1.83 |
| -4 | 3 | -11 | 15.03  | 1.33 |
| -4 | 3 | -11 | 10.43  | 5.40 |
| -4 | 3 | -10 | 52.65  | 4.28 |
| -4 | 3 | -10 | 47.51  | 2.84 |
| -4 | 3 | -10 | 46.54  | 2.57 |
| -4 | 3 | -10 | 53.07  | 2.51 |
| -4 | 3 | -10 | 48.01  | 3.33 |
| -4 | 3 | -9  | 97.86  | 3.84 |
| -4 | 3 | -9  | 137.37 | 4.11 |
| -4 | 3 | -9  | 134.56 | 4.36 |
| -4 | 3 | -9  | 123.94 | 4.42 |
| -4 | 3 | -9  | 106.43 | 4.78 |
| -4 | 3 | -9  | 148.04 | 4.22 |
| -4 | 3 | -9  | 134.52 | 4.07 |
| -4 | 3 | -9  | 143.33 | 4.81 |
| -4 | 3 | -9  | 134.69 | 4.38 |
| -4 | 3 | -8  | 56.34  | 2.73 |
| -4 | 3 | -8  | 49.29  | 2.98 |
| -4 | 3 | -8  | 56.06  | 2.81 |
| -4 | 3 | -8  | 55.63  | 2.76 |
| -4 | 3 | -8  | 51.09  | 2.98 |
| -4 | 3 | -8  | 57.16  | 3.58 |
| -4 | 3 | -8  | 56.84  | 2.69 |
| -4 | 3 | -8  | 54.54  | 2.56 |
| -4 | 3 | -8  | 60.40  | 3.22 |
| -4 | 3 | -8  | 54.08  | 2.90 |
| -4 | 3 | -8  | 57.73  | 2.90 |
| -4 | 3 | -7  | 31.27  | 2.24 |
| -4 | 3 | -7  | 30.90  | 1.88 |

## CIF 31

|    |   |    |        |      |
|----|---|----|--------|------|
| -4 | 3 | -7 | 31.21  | 2.01 |
| -4 | 3 | -7 | 30.34  | 2.04 |
| -4 | 3 | -7 | 23.95  | 2.34 |
| -4 | 3 | -7 | 30.16  | 2.28 |
| -4 | 3 | -7 | 30.79  | 2.01 |
| -4 | 3 | -7 | 28.12  | 2.03 |
| -4 | 3 | -7 | 29.51  | 2.11 |
| -4 | 3 | -6 | 11.39  | 1.39 |
| -4 | 3 | -6 | 10.73  | 1.19 |
| -4 | 3 | -6 | 11.78  | 1.61 |
| -4 | 3 | -6 | 9.78   | 1.27 |
| -4 | 3 | -6 | 11.40  | 1.55 |
| -4 | 3 | -6 | 9.66   | 1.62 |
| -4 | 3 | -6 | 11.66  | 1.12 |
| -4 | 3 | -6 | 9.70   | 1.20 |
| -4 | 3 | -6 | 10.57  | 1.31 |
| -4 | 3 | -5 | 12.81  | 1.15 |
| -4 | 3 | -5 | 13.63  | 1.34 |
| -4 | 3 | -5 | 14.71  | 1.51 |
| -4 | 3 | -5 | 14.17  | 1.68 |
| -4 | 3 | -5 | 9.75   | 1.21 |
| -4 | 3 | -5 | 12.67  | 1.00 |
| -4 | 3 | -5 | 17.83  | 1.82 |
| -4 | 3 | -5 | 12.10  | 1.23 |
| -4 | 3 | -5 | 12.78  | 1.06 |
| -4 | 3 | -5 | 10.56  | 1.18 |
| -4 | 3 | -5 | 11.48  | 1.25 |
| -4 | 3 | -4 | 459.31 | 8.75 |
| -4 | 3 | -4 | 441.70 | 7.55 |
| -4 | 3 | -4 | 452.14 | 8.72 |
| -4 | 3 | -4 | 416.79 | 6.68 |
| -4 | 3 | -4 | 423.90 | 5.96 |
| -4 | 3 | -4 | 476.10 | 8.63 |
| -4 | 3 | -4 | 406.64 | 6.75 |
| -4 | 3 | -4 | 425.38 | 6.79 |
| -4 | 3 | -4 | 424.84 | 6.68 |
| -4 | 3 | -3 | 381.89 | 7.29 |
| -4 | 3 | -3 | 374.72 | 7.55 |
| -4 | 3 | -3 | 354.95 | 5.12 |
| -4 | 3 | -3 | 373.91 | 7.45 |
| -4 | 3 | -3 | 366.10 | 7.13 |



|    |   |    |         |       |
|----|---|----|---------|-------|
| -4 | 3 | -3 | 358.52  | 7.37  |
| -4 | 3 | -2 | 8.86    | 0.95  |
| -4 | 3 | -2 | 9.75    | 1.16  |
| -4 | 3 | -2 | 11.15   | 0.79  |
| -4 | 3 | -2 | 10.20   | 1.07  |
| -4 | 3 | -1 | 225.17  | 4.38  |
| -4 | 3 | -1 | 213.00  | 4.17  |
| -4 | 3 | -1 | 219.39  | 3.73  |
| -4 | 3 | -1 | 229.53  | 4.91  |
| -4 | 3 | -1 | 222.26  | 4.76  |
| -4 | 3 | -1 | 216.25  | 4.42  |
| -4 | 3 | 0  | 650.64  | 8.37  |
| -4 | 3 | 0  | 657.40  | 8.83  |
| -4 | 3 | 0  | 570.99  | 6.11  |
| -4 | 3 | 0  | 600.08  | 8.12  |
| -4 | 3 | 0  | 580.94  | 7.51  |
| -4 | 3 | 0  | 614.22  | 7.19  |
| -4 | 3 | 0  | 595.93  | 8.64  |
| -4 | 3 | 0  | 638.41  | 6.88  |
| -4 | 3 | 0  | 635.17  | 8.46  |
| -4 | 3 | 1  | 643.76  | 6.64  |
| -4 | 3 | 1  | 728.76  | 8.27  |
| -4 | 3 | 1  | 674.26  | 8.61  |
| -4 | 3 | 1  | 697.41  | 8.28  |
| -4 | 3 | 1  | 673.50  | 8.15  |
| -4 | 3 | 1  | 697.74  | 9.04  |
| -4 | 3 | 1  | 668.61  | 7.66  |
| -4 | 3 | 1  | 628.30  | 9.01  |
| -4 | 3 | 1  | 649.84  | 9.04  |
| -4 | 3 | 1  | 702.72  | 7.85  |
| -4 | 3 | 1  | 668.95  | 9.02  |
| -4 | 3 | 2  | 4673.02 | 40.59 |
| -4 | 3 | 2  | 4466.19 | 39.42 |
| -4 | 3 | 2  | 4723.84 | 42.24 |
| -4 | 3 | 2  | 4672.47 | 41.21 |
| -4 | 3 | 2  | 4752.73 | 42.61 |
| -4 | 3 | 2  | 4858.35 | 42.70 |
| -4 | 3 | 2  | 4542.23 | 40.99 |
| -4 | 3 | 2  | 4799.98 | 42.10 |
| -4 | 3 | 2  | 4854.62 | 40.16 |
| -4 | 3 | 2  | 4765.82 | 41.27 |

## CIF 31

|    |   |   |         |       |
|----|---|---|---------|-------|
| -4 | 3 | 2 | 4755.25 | 42.57 |
| -4 | 3 | 3 | 1243.82 | 14.02 |
| -4 | 3 | 3 | 1207.82 | 11.49 |
| -4 | 3 | 3 | 1327.57 | 13.04 |
| -4 | 3 | 3 | 1237.39 | 14.18 |
| -4 | 3 | 3 | 1114.36 | 13.73 |
| -4 | 3 | 3 | 1238.00 | 12.46 |
| -4 | 3 | 3 | 1213.93 | 13.29 |
| -4 | 3 | 3 | 1125.41 | 12.46 |
| -4 | 3 | 3 | 1143.61 | 12.35 |
| -4 | 3 | 3 | 1165.33 | 13.55 |
| -4 | 3 | 3 | 1202.42 | 13.30 |
| -4 | 3 | 4 | 93.86   | 2.11  |
| -4 | 3 | 4 | 106.52  | 3.19  |
| -4 | 3 | 4 | 102.89  | 2.62  |
| -4 | 3 | 4 | 88.83   | 3.16  |
| -4 | 3 | 4 | 113.48  | 2.83  |
| -4 | 3 | 4 | 103.83  | 3.13  |
| -4 | 3 | 4 | 102.69  | 3.15  |
| -4 | 3 | 4 | 104.88  | 2.84  |
| -4 | 3 | 4 | 96.60   | 2.90  |
| -4 | 3 | 4 | 91.67   | 2.48  |
| -4 | 3 | 4 | 113.79  | 3.41  |
| -4 | 3 | 5 | 1023.80 | 12.97 |
| -4 | 3 | 5 | 1082.93 | 11.91 |
| -4 | 3 | 5 | 1044.47 | 13.55 |
| -4 | 3 | 5 | 1066.65 | 11.65 |
| -4 | 3 | 5 | 1044.05 | 12.85 |
| -4 | 3 | 5 | 1037.40 | 13.51 |
| -4 | 3 | 5 | 999.74  | 12.59 |
| -4 | 3 | 5 | 1103.73 | 12.37 |
| -4 | 3 | 5 | 948.55  | 11.92 |
| -4 | 3 | 5 | 952.78  | 13.00 |
| -4 | 3 | 5 | 1088.19 | 11.80 |
| -4 | 3 | 5 | 918.65  | 12.74 |
| -4 | 3 | 6 | 125.27  | 3.16  |
| -4 | 3 | 6 | 125.07  | 4.05  |
| -4 | 3 | 6 | 131.29  | 4.19  |
| -4 | 3 | 6 | 124.96  | 3.96  |
| -4 | 3 | 6 | 139.38  | 4.34  |
| -4 | 3 | 6 | 119.60  | 3.44  |

## CIF 31

|    |   |    |        |       |
|----|---|----|--------|-------|
| -4 | 3 | 6  | 140.89 | 4.35  |
| -4 | 3 | 6  | 122.97 | 3.27  |
| -4 | 3 | 6  | 127.69 | 3.69  |
| -4 | 3 | 6  | 149.96 | 3.57  |
| -4 | 3 | 6  | 111.92 | 3.63  |
| -4 | 3 | 7  | 495.75 | 7.54  |
| -4 | 3 | 7  | 557.70 | 9.55  |
| -4 | 3 | 7  | 538.93 | 9.74  |
| -4 | 3 | 7  | 510.71 | 8.28  |
| -4 | 3 | 7  | 583.99 | 8.80  |
| -4 | 3 | 7  | 516.66 | 7.92  |
| -4 | 3 | 7  | 496.87 | 9.46  |
| -4 | 3 | 7  | 581.86 | 9.14  |
| -4 | 3 | 7  | 605.06 | 8.57  |
| -4 | 3 | 7  | 589.61 | 10.07 |
| -4 | 3 | 7  | 529.88 | 9.11  |
| -4 | 3 | 8  | 144.96 | 5.08  |
| -4 | 3 | 8  | 130.87 | 3.69  |
| -4 | 3 | 8  | 131.28 | 3.47  |
| -4 | 3 | 8  | 142.80 | 4.62  |
| -4 | 3 | 8  | 123.34 | 4.64  |
| -4 | 3 | 8  | 131.99 | 4.67  |
| -4 | 3 | 8  | 141.07 | 4.22  |
| -4 | 3 | 8  | 144.85 | 4.11  |
| -4 | 3 | 8  | 131.25 | 4.30  |
| -4 | 3 | 9  | 161.81 | 4.27  |
| -4 | 3 | 9  | 169.78 | 5.52  |
| -4 | 3 | 9  | 190.33 | 5.12  |
| -4 | 3 | 9  | 185.76 | 5.82  |
| -4 | 3 | 9  | 195.74 | 5.05  |
| -4 | 3 | 9  | 185.39 | 5.94  |
| -4 | 3 | 9  | 157.71 | 4.83  |
| -4 | 3 | 9  | 183.04 | 5.84  |
| -4 | 3 | 10 | 34.53  | 2.63  |
| -4 | 3 | 10 | 34.30  | 2.55  |
| -4 | 3 | 10 | 33.17  | 2.63  |
| -4 | 3 | 10 | 30.58  | 2.13  |
| -4 | 3 | 10 | 34.13  | 2.76  |
| -4 | 3 | 10 | 35.65  | 2.29  |
| -4 | 3 | 10 | 32.45  | 2.73  |
| -4 | 3 | 11 | 1.38   | 1.35  |

## CIF 31

|    |   |     |         |       |
|----|---|-----|---------|-------|
| -4 | 3 | 11  | 2.74    | 1.07  |
| -4 | 3 | 11  | 2.22    | 0.99  |
| -4 | 3 | 11  | 1.26    | 0.84  |
| -4 | 3 | 11  | 0.76    | 1.04  |
| -4 | 3 | 11  | 1.16    | 1.09  |
| -4 | 3 | 11  | 1.05    | 0.75  |
| -4 | 3 | 11  | 0.66    | 0.64  |
| -4 | 3 | 11  | 1.04    | 1.30  |
| -4 | 3 | 12  | 4.04    | 1.15  |
| -4 | 3 | 12  | 3.56    | 0.80  |
| -4 | 3 | 12  | 3.04    | 1.06  |
| -4 | 3 | 12  | 3.60    | 1.26  |
| -4 | 3 | 12  | 2.96    | 0.92  |
| -4 | 3 | 12  | 2.76    | 1.27  |
| -4 | 3 | 12  | 3.58    | 1.32  |
| -4 | 3 | 12  | 3.05    | 0.88  |
| -4 | 3 | 13  | 30.48   | 2.17  |
| -4 | 3 | 13  | 27.36   | 1.99  |
| -4 | 3 | 13  | 26.34   | 2.12  |
| -4 | 3 | 13  | 32.37   | 2.33  |
| -4 | 3 | 14  | 85.06   | 3.05  |
| -4 | 3 | 14  | 85.14   | 3.03  |
| -4 | 3 | 14  | 87.39   | 3.10  |
| -4 | 3 | 14  | 78.69   | 2.73  |
| -4 | 4 | -13 | 33.02   | 2.91  |
| -4 | 4 | -12 | 195.18  | 4.61  |
| -4 | 4 | -12 | 222.72  | 4.98  |
| -4 | 4 | -11 | 14.12   | 1.45  |
| -4 | 4 | -11 | 17.62   | 1.36  |
| -4 | 4 | -11 | 19.56   | 1.86  |
| -4 | 4 | -11 | 19.38   | 2.83  |
| -4 | 4 | -10 | 1052.17 | 13.79 |
| -4 | 4 | -10 | 1123.88 | 13.41 |
| -4 | 4 | -10 | 1123.41 | 14.55 |
| -4 | 4 | -10 | 1059.71 | 15.84 |
| -4 | 4 | -10 | 1106.76 | 15.31 |
| -4 | 4 | -10 | 1067.06 | 15.33 |
| -4 | 4 | -10 | 1080.83 | 15.32 |
| -4 | 4 | -9  | 72.17   | 3.49  |
| -4 | 4 | -9  | 69.34   | 3.10  |
| -4 | 4 | -9  | 73.96   | 3.36  |

## CIF 31

|    |   |    |         |       |
|----|---|----|---------|-------|
| -4 | 4 | -9 | 72.75   | 3.23  |
| -4 | 4 | -9 | 58.02   | 3.17  |
| -4 | 4 | -9 | 71.34   | 2.81  |
| -4 | 4 | -9 | 76.99   | 4.00  |
| -4 | 4 | -9 | 75.08   | 3.63  |
| -4 | 4 | -9 | 57.17   | 3.12  |
| -4 | 4 | -8 | 1451.21 | 17.85 |
| -4 | 4 | -8 | 1384.00 | 16.92 |
| -4 | 4 | -8 | 1466.77 | 18.24 |
| -4 | 4 | -8 | 1357.40 | 17.47 |
| -4 | 4 | -8 | 1421.97 | 17.27 |
| -4 | 4 | -8 | 1384.00 | 17.10 |
| -4 | 4 | -8 | 1368.39 | 15.94 |
| -4 | 4 | -8 | 1355.32 | 19.03 |
| -4 | 4 | -8 | 1305.24 | 19.23 |
| -4 | 4 | -8 | 1327.16 | 17.38 |
| -4 | 4 | -7 | 5.09    | 1.03  |
| -4 | 4 | -7 | 3.08    | 0.96  |
| -4 | 4 | -7 | 4.49    | 1.11  |
| -4 | 4 | -7 | 3.31    | 1.14  |
| -4 | 4 | -7 | 7.09    | 1.51  |
| -4 | 4 | -7 | 2.56    | 1.05  |
| -4 | 4 | -7 | 2.66    | 1.01  |
| -4 | 4 | -7 | 4.43    | 1.51  |
| -4 | 4 | -7 | 5.29    | 1.30  |
| -4 | 4 | -7 | 4.20    | 0.86  |
| -4 | 4 | -7 | 3.17    | 1.03  |
| -4 | 4 | -6 | 85.83   | 3.25  |
| -4 | 4 | -6 | 80.55   | 4.02  |
| -4 | 4 | -6 | 85.28   | 3.97  |
| -4 | 4 | -6 | 88.94   | 2.89  |
| -4 | 4 | -6 | 90.05   | 3.34  |
| -4 | 4 | -6 | 97.28   | 3.18  |
| -4 | 4 | -6 | 88.25   | 3.73  |
| -4 | 4 | -6 | 76.50   | 3.73  |
| -4 | 4 | -6 | 82.21   | 3.33  |
| -4 | 4 | -6 | 82.56   | 3.13  |
| -4 | 4 | -6 | 94.95   | 3.27  |
| -4 | 4 | -5 | 8.20    | 1.02  |
| -4 | 4 | -5 | 11.35   | 1.65  |
| -4 | 4 | -5 | 8.71    | 1.11  |

## CIF 31

|    |   |    |        |       |
|----|---|----|--------|-------|
| -4 | 4 | -5 | 13.15  | 1.68  |
| -4 | 4 | -5 | 8.00   | 1.07  |
| -4 | 4 | -5 | 7.16   | 1.06  |
| -4 | 4 | -5 | 10.86  | 1.57  |
| -4 | 4 | -5 | 8.09   | 1.41  |
| -4 | 4 | -5 | 11.36  | 1.37  |
| -4 | 4 | -5 | 7.55   | 0.94  |
| -4 | 4 | -5 | 8.56   | 1.10  |
| -4 | 4 | -5 | 9.73   | 1.44  |
| -4 | 4 | -5 | 7.88   | 1.12  |
| -4 | 4 | -4 | 135.42 | 4.34  |
| -4 | 4 | -4 | 102.24 | 3.07  |
| -4 | 4 | -4 | 110.40 | 3.19  |
| -4 | 4 | -4 | 126.61 | 4.54  |
| -4 | 4 | -4 | 135.33 | 4.44  |
| -4 | 4 | -4 | 113.22 | 3.10  |
| -4 | 4 | -4 | 129.14 | 4.50  |
| -4 | 4 | -4 | 119.43 | 3.09  |
| -4 | 4 | -4 | 135.42 | 3.82  |
| -4 | 4 | -4 | 113.70 | 3.01  |
| -4 | 4 | -4 | 110.96 | 3.24  |
| -4 | 4 | -4 | 123.70 | 4.32  |
| -4 | 4 | -4 | 103.65 | 3.10  |
| -4 | 4 | -3 | 666.50 | 10.56 |
| -4 | 4 | -3 | 711.54 | 11.34 |
| -4 | 4 | -3 | 707.79 | 10.72 |
| -4 | 4 | -3 | 716.10 | 10.93 |
| -4 | 4 | -3 | 712.30 | 11.22 |
| -4 | 4 | -3 | 642.11 | 8.99  |
| -4 | 4 | -3 | 689.11 | 9.86  |
| -4 | 4 | -3 | 667.40 | 8.37  |
| -4 | 4 | -3 | 663.38 | 10.03 |
| -4 | 4 | -3 | 687.88 | 9.09  |
| -4 | 4 | -2 | 372.46 | 7.21  |
| -4 | 4 | -2 | 359.78 | 6.18  |
| -4 | 4 | -2 | 362.72 | 6.96  |
| -4 | 4 | -2 | 370.76 | 5.34  |
| -4 | 4 | -2 | 355.04 | 6.50  |
| -4 | 4 | -2 | 363.52 | 7.26  |
| -4 | 4 | -2 | 357.28 | 6.70  |
| -4 | 4 | -2 | 347.80 | 5.96  |

## CIF 31

|    |   |    |         |       |
|----|---|----|---------|-------|
| -4 | 4 | -1 | 63.05   | 1.92  |
| -4 | 4 | -1 | 64.59   | 2.66  |
| -4 | 4 | -1 | 58.02   | 1.66  |
| -4 | 4 | -1 | 63.46   | 2.23  |
| -4 | 4 | -1 | 63.56   | 2.51  |
| -4 | 4 | -1 | 63.87   | 2.10  |
| -4 | 4 | -1 | 61.49   | 2.35  |
| -4 | 4 | 0  | 11.15   | 1.09  |
| -4 | 4 | 0  | 11.56   | 0.99  |
| -4 | 4 | 0  | 8.78    | 1.02  |
| -4 | 4 | 0  | 12.40   | 0.99  |
| -4 | 4 | 0  | 12.62   | 0.77  |
| -4 | 4 | 0  | 11.38   | 1.24  |
| -4 | 4 | 0  | 10.27   | 1.15  |
| -4 | 4 | 1  | 3052.24 | 27.42 |
| -4 | 4 | 1  | 3130.40 | 29.45 |
| -4 | 4 | 1  | 3185.66 | 30.32 |
| -4 | 4 | 1  | 3265.39 | 30.48 |
| -4 | 4 | 1  | 3164.46 | 28.60 |
| -4 | 4 | 1  | 3154.37 | 27.99 |
| -4 | 4 | 1  | 3238.29 | 30.19 |
| -4 | 4 | 1  | 3140.14 | 29.91 |
| -4 | 4 | 2  | 649.32  | 8.04  |
| -4 | 4 | 2  | 682.22  | 8.17  |
| -4 | 4 | 2  | 641.87  | 9.04  |
| -4 | 4 | 2  | 613.60  | 7.20  |
| -4 | 4 | 2  | 627.63  | 7.80  |
| -4 | 4 | 2  | 662.73  | 8.32  |
| -4 | 4 | 2  | 665.44  | 8.23  |
| -4 | 4 | 2  | 724.65  | 9.66  |
| -4 | 4 | 2  | 624.42  | 8.86  |
| -4 | 4 | 2  | 672.73  | 9.34  |
| -4 | 4 | 2  | 605.85  | 6.36  |
| -4 | 4 | 2  | 678.65  | 9.44  |
| -4 | 4 | 3  | 10.63   | 0.88  |
| -4 | 4 | 3  | 7.13    | 1.12  |
| -4 | 4 | 3  | 7.20    | 0.83  |
| -4 | 4 | 3  | 16.61   | 1.19  |
| -4 | 4 | 3  | 22.91   | 1.65  |
| -4 | 4 | 3  | 9.34    | 1.19  |
| -4 | 4 | 3  | 6.96    | 0.66  |

## CIF 31

|    |   |   |         |       |
|----|---|---|---------|-------|
| -4 | 4 | 3 | 5.94    | 1.06  |
| -4 | 4 | 3 | 22.70   | 1.68  |
| -4 | 4 | 3 | 7.21    | 0.91  |
| -4 | 4 | 3 | 6.56    | 1.00  |
| -4 | 4 | 3 | 7.19    | 0.97  |
| -4 | 4 | 3 | 5.52    | 0.82  |
| -4 | 4 | 4 | 108.60  | 2.97  |
| -4 | 4 | 4 | 108.63  | 3.56  |
| -4 | 4 | 4 | 108.66  | 3.33  |
| -4 | 4 | 4 | 110.67  | 3.71  |
| -4 | 4 | 4 | 103.42  | 3.64  |
| -4 | 4 | 4 | 110.80  | 2.71  |
| -4 | 4 | 4 | 119.68  | 2.93  |
| -4 | 4 | 4 | 108.49  | 3.05  |
| -4 | 4 | 4 | 110.54  | 3.55  |
| -4 | 4 | 4 | 108.47  | 3.14  |
| -4 | 4 | 4 | 109.06  | 2.57  |
| -4 | 4 | 4 | 112.81  | 3.66  |
| -4 | 4 | 4 | 117.67  | 3.74  |
| -4 | 4 | 4 | 110.41  | 3.42  |
| -4 | 4 | 5 | 1581.61 | 16.97 |
| -4 | 4 | 5 | 1703.43 | 19.43 |
| -4 | 4 | 5 | 1421.27 | 16.62 |
| -4 | 4 | 5 | 1475.92 | 16.02 |
| -4 | 4 | 5 | 1894.45 | 18.31 |
| -4 | 4 | 5 | 1564.70 | 16.36 |
| -4 | 4 | 5 | 1580.08 | 16.02 |
| -4 | 4 | 5 | 1498.39 | 18.08 |
| -4 | 4 | 5 | 1616.30 | 17.28 |
| -4 | 4 | 5 | 1626.58 | 18.48 |
| -4 | 4 | 5 | 1568.65 | 18.87 |
| -4 | 4 | 5 | 1631.83 | 18.90 |
| -4 | 4 | 5 | 1652.62 | 18.74 |
| -4 | 4 | 5 | 1563.75 | 18.47 |
| -4 | 4 | 6 | 595.30  | 10.01 |
| -4 | 4 | 6 | 579.57  | 8.02  |
| -4 | 4 | 6 | 556.38  | 7.45  |
| -4 | 4 | 6 | 580.87  | 9.95  |
| -4 | 4 | 6 | 596.90  | 8.79  |
| -4 | 4 | 6 | 589.91  | 9.72  |
| -4 | 4 | 6 | 571.28  | 9.34  |



## CIF 31

|    |   |    |         |       |
|----|---|----|---------|-------|
| -4 | 4 | 6  | 564.60  | 10.11 |
| -4 | 4 | 6  | 511.28  | 8.16  |
| -4 | 4 | 6  | 545.83  | 7.81  |
| -4 | 4 | 6  | 560.57  | 8.55  |
| -4 | 4 | 6  | 625.83  | 10.31 |
| -4 | 4 | 6  | 550.08  | 9.25  |
| -4 | 4 | 7  | 848.21  | 10.79 |
| -4 | 4 | 7  | 950.88  | 11.49 |
| -4 | 4 | 7  | 883.01  | 12.92 |
| -4 | 4 | 7  | 928.11  | 13.53 |
| -4 | 4 | 7  | 887.23  | 11.96 |
| -4 | 4 | 7  | 848.09  | 12.38 |
| -4 | 4 | 7  | 768.55  | 11.95 |
| -4 | 4 | 7  | 855.15  | 13.78 |
| -4 | 4 | 7  | 946.36  | 12.23 |
| -4 | 4 | 7  | 853.48  | 13.11 |
| -4 | 4 | 7  | 919.13  | 14.00 |
| -4 | 4 | 7  | 898.58  | 13.94 |
| -4 | 4 | 8  | 338.78  | 8.20  |
| -4 | 4 | 8  | 376.84  | 6.66  |
| -4 | 4 | 8  | 349.33  | 8.36  |
| -4 | 4 | 8  | 326.44  | 7.49  |
| -4 | 4 | 8  | 330.96  | 6.81  |
| -4 | 4 | 8  | 280.39  | 6.34  |
| -4 | 4 | 8  | 296.56  | 7.36  |
| -4 | 4 | 8  | 340.36  | 6.96  |
| -4 | 4 | 8  | 344.72  | 8.27  |
| -4 | 4 | 8  | 341.30  | 7.35  |
| -4 | 4 | 9  | 1006.58 | 13.13 |
| -4 | 4 | 9  | 983.33  | 15.59 |
| -4 | 4 | 9  | 941.56  | 15.27 |
| -4 | 4 | 9  | 971.58  | 13.47 |
| -4 | 4 | 9  | 951.52  | 15.70 |
| -4 | 4 | 9  | 1055.01 | 14.05 |
| -4 | 4 | 9  | 912.10  | 14.11 |
| -4 | 4 | 10 | 255.36  | 5.83  |
| -4 | 4 | 10 | 247.74  | 6.98  |
| -4 | 4 | 10 | 244.85  | 7.18  |
| -4 | 4 | 10 | 255.27  | 6.05  |
| -4 | 4 | 10 | 264.25  | 7.36  |
| -4 | 4 | 10 | 262.74  | 7.38  |

## CIF 31

|    |   |     |        |      |
|----|---|-----|--------|------|
| -4 | 4 | 10  | 253.13 | 7.54 |
| -4 | 4 | 11  | 127.02 | 4.80 |
| -4 | 4 | 11  | 124.24 | 4.99 |
| -4 | 4 | 11  | 117.59 | 4.44 |
| -4 | 4 | 11  | 127.92 | 4.84 |
| -4 | 4 | 11  | 122.20 | 3.96 |
| -4 | 4 | 11  | 124.83 | 4.95 |
| -4 | 4 | 11  | 118.82 | 4.14 |
| -4 | 4 | 12  | 6.72   | 1.23 |
| -4 | 4 | 12  | 6.24   | 1.46 |
| -4 | 4 | 12  | 4.71   | 1.21 |
| -4 | 4 | 12  | 5.70   | 1.35 |
| -4 | 4 | 12  | 6.39   | 1.36 |
| -4 | 4 | 13  | 74.55  | 3.07 |
| -4 | 4 | 13  | 73.18  | 2.94 |
| -4 | 4 | 13  | 72.63  | 3.12 |
| -4 | 4 | 14  | 1.29   | 0.57 |
| -4 | 4 | 14  | 1.51   | 0.68 |
| -4 | 5 | -13 | 6.13   | 1.99 |
| -4 | 5 | -13 | 4.07   | 0.93 |
| -4 | 5 | -12 | 127.00 | 3.63 |
| -4 | 5 | -11 | 12.65  | 1.46 |
| -4 | 5 | -11 | 14.22  | 1.65 |
| -4 | 5 | -11 | 13.37  | 3.17 |
| -4 | 5 | -10 | 164.32 | 5.25 |
| -4 | 5 | -10 | 172.22 | 5.04 |
| -4 | 5 | -10 | 163.36 | 5.15 |
| -4 | 5 | -10 | 167.71 | 4.83 |
| -4 | 5 | -10 | 166.36 | 6.50 |
| -4 | 5 | -9  | 2.91   | 1.09 |
| -4 | 5 | -9  | 3.98   | 1.73 |
| -4 | 5 | -9  | 4.14   | 1.60 |
| -4 | 5 | -9  | 6.24   | 1.25 |
| -4 | 5 | -9  | 2.80   | 0.85 |
| -4 | 5 | -8  | 16.17  | 1.72 |
| -4 | 5 | -8  | 10.31  | 1.52 |
| -4 | 5 | -8  | 17.34  | 2.00 |
| -4 | 5 | -8  | 14.05  | 1.94 |
| -4 | 5 | -8  | 10.03  | 1.30 |
| -4 | 5 | -8  | 9.97   | 1.50 |
| -4 | 5 | -8  | 17.83  | 3.91 |

## CIF 31

|    |   |    |        |      |
|----|---|----|--------|------|
| -4 | 5 | -8 | 7.94   | 1.28 |
| -4 | 5 | -8 | 8.88   | 1.16 |
| -4 | 5 | -8 | 7.62   | 1.58 |
| -4 | 5 | -7 | 173.08 | 4.84 |
| -4 | 5 | -7 | 186.33 | 6.42 |
| -4 | 5 | -7 | 185.98 | 5.15 |
| -4 | 5 | -7 | 178.69 | 5.00 |
| -4 | 5 | -7 | 183.84 | 6.09 |
| -4 | 5 | -7 | 178.64 | 6.25 |
| -4 | 5 | -7 | 167.28 | 4.60 |
| -4 | 5 | -7 | 183.86 | 5.22 |
| -4 | 5 | -7 | 184.08 | 5.00 |
| -4 | 5 | -7 | 180.44 | 6.32 |
| -4 | 5 | -7 | 172.13 | 4.56 |
| -4 | 5 | -7 | 200.76 | 5.87 |
| -4 | 5 | -6 | 1.38   | 0.89 |
| -4 | 5 | -6 | 1.37   | 0.94 |
| -4 | 5 | -6 | 0.46   | 0.65 |
| -4 | 5 | -6 | 2.84   | 1.08 |
| -4 | 5 | -6 | 1.44   | 0.91 |
| -4 | 5 | -6 | 1.77   | 2.67 |
| -4 | 5 | -6 | 1.78   | 1.19 |
| -4 | 5 | -6 | 2.04   | 0.92 |
| -4 | 5 | -6 | 1.84   | 0.99 |
| -4 | 5 | -6 | 2.15   | 1.20 |
| -4 | 5 | -6 | 2.92   | 0.82 |
| -4 | 5 | -6 | 2.50   | 1.29 |
| -4 | 5 | -5 | 157.87 | 4.11 |
| -4 | 5 | -5 | 194.25 | 5.12 |
| -4 | 5 | -5 | 185.12 | 5.47 |
| -4 | 5 | -5 | 182.11 | 4.25 |
| -4 | 5 | -5 | 189.21 | 6.07 |
| -4 | 5 | -5 | 188.14 | 6.07 |
| -4 | 5 | -5 | 170.00 | 4.23 |
| -4 | 5 | -5 | 172.13 | 4.55 |
| -4 | 5 | -5 | 202.60 | 5.99 |
| -4 | 5 | -5 | 201.30 | 6.15 |
| -4 | 5 | -5 | 177.78 | 4.51 |
| -4 | 5 | -4 | 127.65 | 4.67 |
| -4 | 5 | -4 | 124.30 | 4.48 |
| -4 | 5 | -4 | 124.45 | 4.34 |

## CIF 31

|    |   |    |         |       |
|----|---|----|---------|-------|
| -4 | 5 | -4 | 109.46  | 3.20  |
| -4 | 5 | -4 | 123.57  | 4.16  |
| -4 | 5 | -4 | 114.86  | 3.20  |
| -4 | 5 | -4 | 120.47  | 3.65  |
| -4 | 5 | -4 | 119.82  | 3.98  |
| -4 | 5 | -4 | 117.05  | 3.25  |
| -4 | 5 | -4 | 113.72  | 3.61  |
| -4 | 5 | -4 | 123.51  | 4.65  |
| -4 | 5 | -4 | 110.67  | 3.38  |
| -4 | 5 | -3 | 218.24  | 4.98  |
| -4 | 5 | -3 | 222.10  | 5.81  |
| -4 | 5 | -3 | 235.38  | 5.75  |
| -4 | 5 | -3 | 226.12  | 5.23  |
| -4 | 5 | -3 | 219.12  | 4.40  |
| -4 | 5 | -3 | 228.63  | 5.79  |
| -4 | 5 | -3 | 231.67  | 5.57  |
| -4 | 5 | -3 | 218.45  | 6.11  |
| -4 | 5 | -3 | 234.55  | 4.65  |
| -4 | 5 | -3 | 233.48  | 4.76  |
| -4 | 5 | -2 | 103.54  | 3.39  |
| -4 | 5 | -2 | 98.86   | 3.81  |
| -4 | 5 | -2 | 103.57  | 2.65  |
| -4 | 5 | -2 | 113.22  | 4.07  |
| -4 | 5 | -2 | 101.87  | 3.54  |
| -4 | 5 | -2 | 106.18  | 3.08  |
| -4 | 5 | -2 | 100.40  | 3.35  |
| -4 | 5 | -2 | 95.92   | 2.72  |
| -4 | 5 | -2 | 98.12   | 3.70  |
| -4 | 5 | -2 | 103.92  | 3.10  |
| -4 | 5 | -1 | 3652.49 | 34.59 |
| -4 | 5 | -1 | 3690.15 | 34.56 |
| -4 | 5 | -1 | 3263.64 | 31.81 |
| -4 | 5 | -1 | 3418.33 | 30.88 |
| -4 | 5 | -1 | 3697.14 | 35.03 |
| -4 | 5 | -1 | 3583.56 | 34.62 |
| -4 | 5 | -1 | 3560.88 | 32.13 |
| -4 | 5 | -1 | 3220.76 | 33.03 |
| -4 | 5 | -1 | 3447.95 | 33.26 |
| -4 | 5 | -1 | 3437.99 | 31.22 |
| -4 | 5 | -1 | 3332.75 | 33.53 |
| -4 | 5 | -1 | 3212.59 | 32.29 |

## CIF 31

|    |   |   |         |       |
|----|---|---|---------|-------|
| -4 | 5 | 0 | 484.80  | 8.32  |
| -4 | 5 | 0 | 445.91  | 6.22  |
| -4 | 5 | 0 | 459.78  | 7.87  |
| -4 | 5 | 0 | 458.00  | 6.89  |
| -4 | 5 | 0 | 462.03  | 7.31  |
| -4 | 5 | 0 | 520.65  | 7.20  |
| -4 | 5 | 0 | 507.68  | 6.79  |
| -4 | 5 | 0 | 472.60  | 7.88  |
| -4 | 5 | 0 | 457.24  | 7.77  |
| -4 | 5 | 0 | 453.36  | 8.38  |
| -4 | 5 | 0 | 427.41  | 7.75  |
| -4 | 5 | 0 | 490.22  | 7.03  |
| -4 | 5 | 0 | 439.33  | 7.58  |
| -4 | 5 | 0 | 463.59  | 7.55  |
| -4 | 5 | 1 | 3199.66 | 30.75 |
| -4 | 5 | 1 | 3302.91 | 32.22 |
| -4 | 5 | 1 | 3057.97 | 30.89 |
| -4 | 5 | 1 | 3163.69 | 30.07 |
| -4 | 5 | 1 | 3195.18 | 31.14 |
| -4 | 5 | 1 | 3036.15 | 29.22 |
| -4 | 5 | 1 | 2997.16 | 30.90 |
| -4 | 5 | 1 | 3117.40 | 29.29 |
| -4 | 5 | 1 | 3372.44 | 31.17 |
| -4 | 5 | 1 | 2918.36 | 30.52 |
| -4 | 5 | 1 | 3123.74 | 28.43 |
| -4 | 5 | 1 | 3325.86 | 31.59 |
| -4 | 5 | 1 | 3233.57 | 31.29 |
| -4 | 5 | 1 | 3040.56 | 30.63 |
| -4 | 5 | 2 | 1.43    | 0.81  |
| -4 | 5 | 2 | 1.27    | 0.51  |
| -4 | 5 | 2 | 0.96    | 0.33  |
| -4 | 5 | 2 | 0.53    | 0.84  |
| -4 | 5 | 2 | 1.18    | 0.86  |
| -4 | 5 | 2 | 8.75    | 1.33  |
| -4 | 5 | 2 | 1.68    | 0.87  |
| -4 | 5 | 2 | 0.78    | 0.60  |
| -4 | 5 | 2 | 0.69    | 0.84  |
| -4 | 5 | 2 | 1.59    | 0.85  |
| -4 | 5 | 2 | 2.87    | 0.78  |
| -4 | 5 | 2 | 1.21    | 0.58  |
| -4 | 5 | 2 | 10.85   | 1.02  |

## CIF 31

|    |   |   |         |       |
|----|---|---|---------|-------|
| -4 | 5 | 2 | 1.23    | 0.68  |
| -4 | 5 | 3 | 4893.62 | 42.36 |
| -4 | 5 | 3 | 4656.50 | 44.10 |
| -4 | 5 | 3 | 4995.74 | 44.40 |
| -4 | 5 | 3 | 4870.07 | 44.64 |
| -4 | 5 | 3 | 5037.18 | 43.16 |
| -4 | 5 | 3 | 4456.82 | 44.05 |
| -4 | 5 | 3 | 4439.56 | 41.13 |
| -4 | 5 | 3 | 4514.34 | 43.09 |
| -4 | 5 | 3 | 4464.81 | 42.21 |
| -4 | 5 | 3 | 4638.03 | 44.66 |
| -4 | 5 | 3 | 4930.59 | 45.28 |
| -4 | 5 | 3 | 4449.58 | 43.24 |
| -4 | 5 | 3 | 4906.40 | 44.83 |
| -4 | 5 | 4 | 1371.53 | 16.94 |
| -4 | 5 | 4 | 1200.31 | 15.18 |
| -4 | 5 | 4 | 1244.92 | 16.03 |
| -4 | 5 | 4 | 1281.23 | 16.63 |
| -4 | 5 | 4 | 1258.53 | 16.18 |
| -4 | 5 | 4 | 1347.21 | 16.73 |
| -4 | 5 | 4 | 1274.14 | 16.32 |
| -4 | 5 | 4 | 1264.01 | 16.30 |
| -4 | 5 | 4 | 1217.14 | 14.22 |
| -4 | 5 | 4 | 1117.22 | 14.71 |
| -4 | 5 | 4 | 1213.16 | 14.73 |
| -4 | 5 | 4 | 1284.17 | 13.77 |
| -4 | 5 | 4 | 1251.00 | 15.64 |
| -4 | 5 | 4 | 1284.19 | 14.55 |
| -4 | 5 | 5 | 449.94  | 8.81  |
| -4 | 5 | 5 | 433.28  | 8.37  |
| -4 | 5 | 5 | 441.28  | 8.76  |
| -4 | 5 | 5 | 410.08  | 8.42  |
| -4 | 5 | 5 | 411.12  | 6.13  |
| -4 | 5 | 5 | 395.23  | 8.09  |
| -4 | 5 | 5 | 421.46  | 7.12  |
| -4 | 5 | 5 | 411.10  | 8.02  |
| -4 | 5 | 5 | 428.37  | 8.49  |
| -4 | 5 | 5 | 443.57  | 6.83  |
| -4 | 5 | 5 | 411.82  | 7.66  |
| -4 | 5 | 5 | 428.94  | 7.43  |
| -4 | 5 | 5 | 422.23  | 8.30  |

## CIF 31

|    |   |   |        |      |
|----|---|---|--------|------|
| -4 | 5 | 6 | 99.38  | 3.92 |
| -4 | 5 | 6 | 90.00  | 3.34 |
| -4 | 5 | 6 | 98.56  | 4.07 |
| -4 | 5 | 6 | 89.86  | 4.04 |
| -4 | 5 | 6 | 102.94 | 3.18 |
| -4 | 5 | 6 | 95.10  | 4.19 |
| -4 | 5 | 6 | 100.51 | 3.38 |
| -4 | 5 | 6 | 108.16 | 3.62 |
| -4 | 5 | 6 | 98.95  | 4.03 |
| -4 | 5 | 6 | 96.83  | 4.11 |
| -4 | 5 | 6 | 107.39 | 4.03 |
| -4 | 5 | 6 | 108.02 | 4.28 |
| -4 | 5 | 7 | 199.40 | 4.83 |
| -4 | 5 | 7 | 225.17 | 5.42 |
| -4 | 5 | 7 | 182.41 | 5.44 |
| -4 | 5 | 7 | 191.70 | 4.90 |
| -4 | 5 | 7 | 207.72 | 6.33 |
| -4 | 5 | 7 | 188.16 | 6.19 |
| -4 | 5 | 7 | 179.43 | 5.42 |
| -4 | 5 | 7 | 177.72 | 5.58 |
| -4 | 5 | 7 | 209.00 | 6.23 |
| -4 | 5 | 7 | 213.25 | 6.20 |
| -4 | 5 | 8 | 40.69  | 2.28 |
| -4 | 5 | 8 | 39.19  | 3.06 |
| -4 | 5 | 8 | 33.32  | 2.54 |
| -4 | 5 | 8 | 32.49  | 2.28 |
| -4 | 5 | 8 | 36.60  | 2.90 |
| -4 | 5 | 8 | 45.51  | 2.56 |
| -4 | 5 | 8 | 39.97  | 2.28 |
| -4 | 5 | 8 | 35.91  | 2.39 |
| -4 | 5 | 8 | 43.04  | 2.78 |
| -4 | 5 | 8 | 33.58  | 2.85 |
| -4 | 5 | 8 | 42.28  | 2.86 |
| -4 | 5 | 9 | 231.62 | 5.61 |
| -4 | 5 | 9 | 201.73 | 6.58 |
| -4 | 5 | 9 | 239.97 | 5.99 |
| -4 | 5 | 9 | 220.44 | 5.45 |
| -4 | 5 | 9 | 222.80 | 6.98 |
| -4 | 5 | 9 | 206.72 | 6.74 |
| -4 | 5 | 9 | 197.66 | 5.71 |
| -4 | 5 | 9 | 201.05 | 6.06 |

## CIF 31

|    |   |     |         |       |
|----|---|-----|---------|-------|
| -4 | 5 | 10  | 15.13   | 2.11  |
| -4 | 5 | 10  | 16.03   | 2.05  |
| -4 | 5 | 10  | 17.65   | 2.01  |
| -4 | 5 | 10  | 16.77   | 1.59  |
| -4 | 5 | 10  | 17.03   | 1.48  |
| -4 | 5 | 10  | 15.40   | 2.15  |
| -4 | 5 | 10  | 15.99   | 2.00  |
| -4 | 5 | 10  | 14.17   | 1.64  |
| -4 | 5 | 11  | 300.26  | 7.40  |
| -4 | 5 | 11  | 295.74  | 7.26  |
| -4 | 5 | 11  | 274.78  | 6.81  |
| -4 | 5 | 11  | 293.76  | 7.71  |
| -4 | 5 | 11  | 287.90  | 7.45  |
| -4 | 5 | 11  | 309.60  | 7.54  |
| -4 | 5 | 12  | 14.92   | 1.50  |
| -4 | 5 | 12  | 12.68   | 1.64  |
| -4 | 5 | 12  | 12.52   | 1.49  |
| -4 | 5 | 13  | 19.93   | 1.44  |
| -4 | 5 | 13  | 20.56   | 1.51  |
| -4 | 5 | 13  | 17.96   | 1.53  |
| -4 | 5 | 13  | 21.71   | 1.55  |
| -4 | 6 | -13 | 159.76  | 3.80  |
| -4 | 6 | -13 | 155.78  | 3.19  |
| -4 | 6 | -12 | 1.78    | 2.60  |
| -4 | 6 | -12 | 5.51    | 1.00  |
| -4 | 6 | -11 | 203.13  | 5.05  |
| -4 | 6 | -11 | 220.62  | 5.40  |
| -4 | 6 | -11 | 212.33  | 5.87  |
| -4 | 6 | -10 | 1100.09 | 14.66 |
| -4 | 6 | -10 | 935.92  | 15.11 |
| -4 | 6 | -10 | 1094.76 | 14.35 |
| -4 | 6 | -10 | 1180.58 | 15.26 |
| -4 | 6 | -10 | 966.16  | 12.66 |
| -4 | 6 | -10 | 1171.01 | 15.97 |
| -4 | 6 | -10 | 1038.14 | 14.23 |
| -4 | 6 | -10 | 1060.48 | 14.62 |
| -4 | 6 | -9  | 1085.07 | 14.79 |
| -4 | 6 | -9  | 1040.20 | 14.17 |
| -4 | 6 | -9  | 1031.29 | 15.88 |
| -4 | 6 | -9  | 1032.84 | 14.16 |
| -4 | 6 | -9  | 1091.71 | 15.32 |



## CIF 31

|    |   |    |         |       |
|----|---|----|---------|-------|
| -4 | 6 | -9 | 1004.09 | 14.38 |
| -4 | 6 | -9 | 1086.66 | 13.48 |
| -4 | 6 | -9 | 987.55  | 13.98 |
| -4 | 6 | -8 | 6.66    | 1.62  |
| -4 | 6 | -8 | 3.48    | 1.25  |
| -4 | 6 | -8 | 4.14    | 1.17  |
| -4 | 6 | -8 | 3.56    | 1.33  |
| -4 | 6 | -8 | 5.98    | 1.49  |
| -4 | 6 | -8 | 4.91    | 1.57  |
| -4 | 6 | -8 | 3.21    | 1.08  |
| -4 | 6 | -8 | 3.53    | 1.24  |
| -4 | 6 | -8 | 3.93    | 1.04  |
| -4 | 6 | -8 | 2.63    | 1.62  |
| -4 | 6 | -7 | 64.58   | 3.42  |
| -4 | 6 | -7 | 53.55   | 2.64  |
| -4 | 6 | -7 | 60.06   | 3.79  |
| -4 | 6 | -7 | 57.05   | 2.89  |
| -4 | 6 | -7 | 62.80   | 3.70  |
| -4 | 6 | -7 | 64.93   | 3.95  |
| -4 | 6 | -7 | 55.80   | 2.73  |
| -4 | 6 | -7 | 58.74   | 2.73  |
| -4 | 6 | -7 | 57.50   | 2.94  |
| -4 | 6 | -7 | 57.27   | 2.94  |
| -4 | 6 | -6 | 46.16   | 3.29  |
| -4 | 6 | -6 | 54.88   | 2.48  |
| -4 | 6 | -6 | 42.55   | 2.66  |
| -4 | 6 | -6 | 54.45   | 2.50  |
| -4 | 6 | -6 | 46.07   | 3.31  |
| -4 | 6 | -6 | 46.00   | 3.12  |
| -4 | 6 | -6 | 42.72   | 2.84  |
| -4 | 6 | -6 | 49.10   | 2.52  |
| -4 | 6 | -6 | 51.42   | 2.67  |
| -4 | 6 | -6 | 48.00   | 2.45  |
| -4 | 6 | -5 | 206.26  | 6.59  |
| -4 | 6 | -5 | 190.99  | 4.42  |
| -4 | 6 | -5 | 197.57  | 5.72  |
| -4 | 6 | -5 | 208.27  | 6.35  |
| -4 | 6 | -5 | 203.81  | 6.00  |
| -4 | 6 | -5 | 221.27  | 4.87  |
| -4 | 6 | -5 | 212.18  | 6.72  |
| -4 | 6 | -5 | 192.02  | 4.76  |

## CIF 31

|    |   |    |        |       |
|----|---|----|--------|-------|
| -4 | 6 | -5 | 206.69 | 4.92  |
| -4 | 6 | -5 | 207.54 | 5.35  |
| -4 | 6 | -5 | 196.23 | 4.98  |
| -4 | 6 | -5 | 197.06 | 5.47  |
| -4 | 6 | -5 | 203.88 | 4.95  |
| -4 | 6 | -4 | 753.95 | 10.94 |
| -4 | 6 | -4 | 882.02 | 13.39 |
| -4 | 6 | -4 | 884.38 | 13.26 |
| -4 | 6 | -4 | 864.76 | 13.61 |
| -4 | 6 | -4 | 822.12 | 11.70 |
| -4 | 6 | -4 | 869.87 | 11.23 |
| -4 | 6 | -4 | 812.43 | 12.44 |
| -4 | 6 | -4 | 794.45 | 10.81 |
| -4 | 6 | -4 | 877.10 | 14.42 |
| -4 | 6 | -3 | 145.63 | 3.84  |
| -4 | 6 | -3 | 160.15 | 3.90  |
| -4 | 6 | -3 | 197.71 | 5.66  |
| -4 | 6 | -3 | 170.36 | 4.13  |
| -4 | 6 | -3 | 189.97 | 5.51  |
| -4 | 6 | -3 | 199.82 | 5.93  |
| -4 | 6 | -3 | 177.74 | 4.77  |
| -4 | 6 | -3 | 177.78 | 5.04  |
| -4 | 6 | -2 | 0.10   | 0.59  |
| -4 | 6 | -2 | 0.37   | 0.85  |
| -4 | 6 | -2 | 0.10   | 0.66  |
| -4 | 6 | -2 | 0.98   | 0.83  |
| -4 | 6 | -2 | 0.32   | 0.64  |
| -4 | 6 | -2 | 0.64   | 0.85  |
| -4 | 6 | -2 | 0.32   | 0.68  |
| -4 | 6 | -2 | -0.09  | 0.88  |
| -4 | 6 | -2 | 0.26   | 0.74  |
| -4 | 6 | -2 | 1.11   | 0.70  |
| -4 | 6 | -1 | 420.84 | 7.75  |
| -4 | 6 | -1 | 425.94 | 8.67  |
| -4 | 6 | -1 | 421.53 | 6.44  |
| -4 | 6 | -1 | 406.72 | 6.81  |
| -4 | 6 | -1 | 408.10 | 7.71  |
| -4 | 6 | -1 | 433.12 | 7.12  |
| -4 | 6 | -1 | 436.51 | 8.42  |
| -4 | 6 | -1 | 413.19 | 8.21  |
| -4 | 6 | -1 | 402.91 | 7.97  |

## CIF 31

|    |   |    |        |       |
|----|---|----|--------|-------|
| -4 | 6 | -1 | 440.80 | 8.69  |
| -4 | 6 | -1 | 420.66 | 7.76  |
| -4 | 6 | -1 | 418.28 | 7.49  |
| -4 | 6 | -1 | 416.83 | 7.29  |
| -4 | 6 | 0  | 238.15 | 5.60  |
| -4 | 6 | 0  | 239.51 | 5.94  |
| -4 | 6 | 0  | 242.87 | 6.10  |
| -4 | 6 | 0  | 250.51 | 5.83  |
| -4 | 6 | 0  | 202.76 | 4.28  |
| -4 | 6 | 0  | 239.08 | 5.27  |
| -4 | 6 | 0  | 229.20 | 4.81  |
| -4 | 6 | 0  | 216.82 | 5.55  |
| -4 | 6 | 0  | 257.63 | 5.98  |
| -4 | 6 | 0  | 247.25 | 5.86  |
| -4 | 6 | 0  | 235.06 | 4.98  |
| -4 | 6 | 0  | 220.76 | 5.70  |
| -4 | 6 | 0  | 235.86 | 5.85  |
| -4 | 6 | 0  | 249.18 | 5.55  |
| -4 | 6 | 1  | 850.46 | 11.86 |
| -4 | 6 | 1  | 824.86 | 10.11 |
| -4 | 6 | 1  | 848.26 | 12.38 |
| -4 | 6 | 1  | 825.96 | 11.21 |
| -4 | 6 | 1  | 848.35 | 10.59 |
| -4 | 6 | 1  | 824.34 | 11.90 |
| -4 | 6 | 1  | 798.69 | 12.76 |
| -4 | 6 | 1  | 799.87 | 12.02 |
| -4 | 6 | 1  | 809.56 | 11.92 |
| -4 | 6 | 1  | 823.47 | 12.03 |
| -4 | 6 | 1  | 788.17 | 10.06 |
| -4 | 6 | 1  | 776.49 | 11.11 |
| -4 | 6 | 1  | 868.43 | 12.42 |
| -4 | 6 | 1  | 763.07 | 10.72 |
| -4 | 6 | 1  | 826.01 | 11.65 |
| -4 | 6 | 1  | 826.95 | 12.07 |
| -4 | 6 | 1  | 867.91 | 12.08 |
| -4 | 6 | 2  | 885.79 | 12.06 |
| -4 | 6 | 2  | 782.49 | 11.49 |
| -4 | 6 | 2  | 760.85 | 10.14 |
| -4 | 6 | 2  | 702.23 | 11.25 |
| -4 | 6 | 2  | 843.66 | 12.88 |
| -4 | 6 | 2  | 814.03 | 10.87 |

## CIF 31

|    |   |   |        |       |
|----|---|---|--------|-------|
| -4 | 6 | 2 | 816.72 | 12.04 |
| -4 | 6 | 2 | 833.25 | 12.59 |
| -4 | 6 | 2 | 778.27 | 8.91  |
| -4 | 6 | 2 | 790.65 | 10.32 |
| -4 | 6 | 2 | 784.05 | 9.99  |
| -4 | 6 | 2 | 799.96 | 12.10 |
| -4 | 6 | 2 | 818.09 | 12.17 |
| -4 | 6 | 2 | 802.33 | 12.15 |
| -4 | 6 | 3 | 14.20  | 1.47  |
| -4 | 6 | 3 | 14.62  | 1.68  |
| -4 | 6 | 3 | 16.76  | 1.74  |
| -4 | 6 | 3 | 20.08  | 1.45  |
| -4 | 6 | 3 | 17.09  | 1.81  |
| -4 | 6 | 3 | 18.51  | 1.35  |
| -4 | 6 | 3 | 17.11  | 1.47  |
| -4 | 6 | 3 | 13.97  | 1.78  |
| -4 | 6 | 3 | 13.69  | 1.70  |
| -4 | 6 | 3 | 14.89  | 1.74  |
| -4 | 6 | 3 | 20.26  | 1.15  |
| -4 | 6 | 3 | 19.60  | 1.56  |
| -4 | 6 | 4 | 150.24 | 3.88  |
| -4 | 6 | 4 | 129.63 | 4.13  |
| -4 | 6 | 4 | 149.47 | 5.09  |
| -4 | 6 | 4 | 140.41 | 4.41  |
| -4 | 6 | 4 | 138.01 | 3.76  |
| -4 | 6 | 4 | 143.49 | 4.90  |
| -4 | 6 | 4 | 150.37 | 5.13  |
| -4 | 6 | 4 | 136.97 | 4.84  |
| -4 | 6 | 4 | 139.46 | 4.91  |
| -4 | 6 | 4 | 145.18 | 4.67  |
| -4 | 6 | 4 | 133.73 | 4.94  |
| -4 | 6 | 4 | 145.71 | 4.22  |
| -4 | 6 | 4 | 149.62 | 3.40  |
| -4 | 6 | 5 | 14.03  | 1.68  |
| -4 | 6 | 5 | 15.39  | 1.36  |
| -4 | 6 | 5 | 12.16  | 1.73  |
| -4 | 6 | 5 | 14.16  | 1.89  |
| -4 | 6 | 5 | 12.96  | 1.65  |
| -4 | 6 | 5 | 15.49  | 1.95  |
| -4 | 6 | 5 | 16.03  | 1.35  |
| -4 | 6 | 5 | 15.20  | 1.84  |

## CIF 31

|    |   |    |         |       |
|----|---|----|---------|-------|
| -4 | 6 | 5  | 12.94   | 1.53  |
| -4 | 6 | 5  | 11.93   | 1.45  |
| -4 | 6 | 5  | 11.55   | 1.92  |
| -4 | 6 | 6  | 917.20  | 15.01 |
| -4 | 6 | 6  | 906.43  | 14.35 |
| -4 | 6 | 6  | 977.09  | 12.51 |
| -4 | 6 | 6  | 904.11  | 14.69 |
| -4 | 6 | 6  | 1017.59 | 13.01 |
| -4 | 6 | 6  | 925.92  | 14.75 |
| -4 | 6 | 6  | 1003.97 | 15.50 |
| -4 | 6 | 6  | 859.11  | 13.13 |
| -4 | 6 | 6  | 861.02  | 14.15 |
| -4 | 6 | 6  | 1006.69 | 15.48 |
| -4 | 6 | 7  | 27.72   | 2.51  |
| -4 | 6 | 7  | 22.78   | 2.54  |
| -4 | 6 | 7  | 27.45   | 2.56  |
| -4 | 6 | 7  | 28.80   | 2.52  |
| -4 | 6 | 7  | 24.05   | 1.73  |
| -4 | 6 | 7  | 28.38   | 1.99  |
| -4 | 6 | 7  | 25.55   | 2.28  |
| -4 | 6 | 7  | 25.82   | 2.33  |
| -4 | 6 | 7  | 27.59   | 2.53  |
| -4 | 6 | 8  | 11.14   | 1.97  |
| -4 | 6 | 8  | 10.12   | 1.55  |
| -4 | 6 | 8  | 9.19    | 1.62  |
| -4 | 6 | 8  | 10.85   | 1.74  |
| -4 | 6 | 8  | 10.67   | 1.53  |
| -4 | 6 | 8  | 9.62    | 1.66  |
| -4 | 6 | 8  | 11.01   | 1.30  |
| -4 | 6 | 8  | 9.00    | 1.77  |
| -4 | 6 | 9  | 216.52  | 6.05  |
| -4 | 6 | 9  | 208.58  | 6.73  |
| -4 | 6 | 9  | 203.19  | 6.53  |
| -4 | 6 | 9  | 213.23  | 6.90  |
| -4 | 6 | 9  | 194.42  | 6.08  |
| -4 | 6 | 10 | 194.93  | 4.93  |
| -4 | 6 | 10 | 191.68  | 6.12  |
| -4 | 6 | 10 | 186.65  | 5.82  |
| -4 | 6 | 10 | 178.45  | 5.84  |
| -4 | 6 | 10 | 169.04  | 5.76  |
| -4 | 6 | 10 | 213.13  | 5.37  |

## CIF 31

|    |   |     |        |      |
|----|---|-----|--------|------|
| -4 | 6 | 10  | 155.03 | 5.27 |
| -4 | 6 | 10  | 152.48 | 4.89 |
| -4 | 6 | 11  | 0.48   | 1.06 |
| -4 | 6 | 11  | 0.71   | 1.09 |
| -4 | 6 | 11  | 0.62   | 0.85 |
| -4 | 6 | 11  | 1.59   | 1.03 |
| -4 | 6 | 11  | 0.50   | 0.86 |
| -4 | 6 | 11  | 0.08   | 0.79 |
| -4 | 6 | 12  | 12.55  | 1.20 |
| -4 | 6 | 12  | 14.77  | 1.37 |
| -4 | 6 | 12  | 15.86  | 1.47 |
| -4 | 7 | -13 | 26.28  | 1.39 |
| -4 | 7 | -12 | 14.33  | 1.21 |
| -4 | 7 | -11 | 42.99  | 2.26 |
| -4 | 7 | -11 | 42.91  | 2.27 |
| -4 | 7 | -11 | 45.28  | 4.05 |
| -4 | 7 | -10 | 119.25 | 5.23 |
| -4 | 7 | -10 | 119.48 | 3.98 |
| -4 | 7 | -10 | 117.13 | 3.46 |
| -4 | 7 | -10 | 114.72 | 3.92 |
| -4 | 7 | -9  | 37.01  | 3.56 |
| -4 | 7 | -9  | 26.65  | 2.30 |
| -4 | 7 | -9  | 32.40  | 2.23 |
| -4 | 7 | -9  | 29.68  | 2.53 |
| -4 | 7 | -9  | 37.22  | 5.29 |
| -4 | 7 | -9  | 39.64  | 2.36 |
| -4 | 7 | -9  | 38.08  | 2.44 |
| -4 | 7 | -9  | 36.96  | 3.96 |
| -4 | 7 | -8  | 22.83  | 2.75 |
| -4 | 7 | -8  | 15.79  | 1.89 |
| -4 | 7 | -8  | 17.50  | 2.18 |
| -4 | 7 | -8  | 17.10  | 2.32 |
| -4 | 7 | -8  | 16.54  | 2.34 |
| -4 | 7 | -8  | 29.08  | 2.05 |
| -4 | 7 | -8  | 21.37  | 1.92 |
| -4 | 7 | -8  | 28.60  | 3.43 |
| -4 | 7 | -8  | 26.57  | 2.09 |
| -4 | 7 | -8  | 26.38  | 2.67 |
| -4 | 7 | -7  | 418.12 | 8.84 |
| -4 | 7 | -7  | 420.17 | 9.89 |
| -4 | 7 | -7  | 397.69 | 9.02 |

## CIF 31

|    |   |    |        |       |
|----|---|----|--------|-------|
| -4 | 7 | -7 | 402.24 | 10.35 |
| -4 | 7 | -7 | 415.45 | 10.53 |
| -4 | 7 | -7 | 419.78 | 8.14  |
| -4 | 7 | -7 | 411.82 | 8.22  |
| -4 | 7 | -7 | 436.71 | 8.04  |
| -4 | 7 | -6 | 45.66  | 2.65  |
| -4 | 7 | -6 | 56.63  | 3.62  |
| -4 | 7 | -6 | 53.86  | 3.26  |
| -4 | 7 | -6 | 54.47  | 2.77  |
| -4 | 7 | -6 | 52.72  | 2.60  |
| -4 | 7 | -6 | 52.85  | 3.76  |
| -4 | 7 | -6 | 54.07  | 2.93  |
| -4 | 7 | -6 | 45.73  | 2.53  |
| -4 | 7 | -6 | 59.28  | 3.86  |
| -4 | 7 | -6 | 45.21  | 2.45  |
| -4 | 7 | -5 | 592.25 | 11.64 |
| -4 | 7 | -5 | 530.09 | 8.62  |
| -4 | 7 | -5 | 558.40 | 9.22  |
| -4 | 7 | -5 | 550.43 | 9.44  |
| -4 | 7 | -5 | 564.53 | 10.78 |
| -4 | 7 | -5 | 494.56 | 9.01  |
| -4 | 7 | -5 | 590.15 | 11.19 |
| -4 | 7 | -5 | 539.28 | 8.81  |
| -4 | 7 | -5 | 599.74 | 12.22 |
| -4 | 7 | -5 | 598.00 | 12.13 |
| -4 | 7 | -5 | 558.92 | 10.18 |
| -4 | 7 | -4 | 158.40 | 4.37  |
| -4 | 7 | -4 | 161.19 | 4.36  |
| -4 | 7 | -4 | 159.20 | 5.62  |
| -4 | 7 | -4 | 147.79 | 4.51  |
| -4 | 7 | -4 | 155.54 | 4.38  |
| -4 | 7 | -4 | 155.79 | 5.08  |
| -4 | 7 | -4 | 165.74 | 5.54  |
| -4 | 7 | -3 | 91.14  | 4.37  |
| -4 | 7 | -3 | 84.95  | 4.04  |
| -4 | 7 | -3 | 74.07  | 2.80  |
| -4 | 7 | -3 | 87.74  | 4.19  |
| -4 | 7 | -3 | 82.92  | 4.02  |
| -4 | 7 | -3 | 82.31  | 3.02  |
| -4 | 7 | -3 | 83.99  | 3.45  |
| -4 | 7 | -3 | 82.00  | 3.04  |

## CIF 31

|    |   |    |        |      |
|----|---|----|--------|------|
| -4 | 7 | -3 | 74.77  | 3.75 |
| -4 | 7 | -3 | 86.96  | 3.75 |
| -4 | 7 | -2 | 18.38  | 1.40 |
| -4 | 7 | -2 | 17.06  | 1.46 |
| -4 | 7 | -2 | 26.49  | 2.40 |
| -4 | 7 | -2 | 19.52  | 1.87 |
| -4 | 7 | -2 | 21.15  | 1.77 |
| -4 | 7 | -2 | 20.41  | 1.98 |
| -4 | 7 | -2 | 24.20  | 1.94 |
| -4 | 7 | -2 | 19.86  | 2.06 |
| -4 | 7 | -2 | 22.89  | 1.80 |
| -4 | 7 | -2 | 19.35  | 1.58 |
| -4 | 7 | -1 | 1.92   | 1.07 |
| -4 | 7 | -1 | 1.60   | 1.04 |
| -4 | 7 | -1 | 0.73   | 0.93 |
| -4 | 7 | -1 | 2.73   | 1.17 |
| -4 | 7 | -1 | 1.30   | 0.73 |
| -4 | 7 | -1 | 0.84   | 0.92 |
| -4 | 7 | -1 | 2.87   | 1.05 |
| -4 | 7 | -1 | 1.01   | 1.01 |
| -4 | 7 | -1 | 1.18   | 0.74 |
| -4 | 7 | -1 | 3.20   | 0.96 |
| -4 | 7 | -1 | 1.70   | 0.82 |
| -4 | 7 | -1 | 1.35   | 1.18 |
| -4 | 7 | 0  | 207.93 | 5.96 |
| -4 | 7 | 0  | 187.04 | 4.54 |
| -4 | 7 | 0  | 211.42 | 5.84 |
| -4 | 7 | 0  | 197.24 | 5.12 |
| -4 | 7 | 0  | 214.71 | 5.91 |
| -4 | 7 | 0  | 199.69 | 5.77 |
| -4 | 7 | 0  | 198.66 | 5.55 |
| -4 | 7 | 0  | 204.69 | 4.62 |
| -4 | 7 | 0  | 195.11 | 5.65 |
| -4 | 7 | 0  | 211.72 | 6.04 |
| -4 | 7 | 0  | 194.37 | 5.82 |
| -4 | 7 | 0  | 176.79 | 4.75 |
| -4 | 7 | 0  | 198.52 | 5.38 |
| -4 | 7 | 1  | 104.68 | 4.54 |
| -4 | 7 | 1  | 118.86 | 4.37 |
| -4 | 7 | 1  | 116.70 | 4.46 |
| -4 | 7 | 1  | 104.56 | 4.30 |



## CIF 31

|    |   |   |         |       |
|----|---|---|---------|-------|
| -4 | 7 | 1 | 118.98  | 4.35  |
| -4 | 7 | 1 | 122.02  | 3.55  |
| -4 | 7 | 1 | 108.60  | 3.95  |
| -4 | 7 | 1 | 111.58  | 4.27  |
| -4 | 7 | 1 | 113.57  | 3.81  |
| -4 | 7 | 1 | 106.38  | 3.92  |
| -4 | 7 | 1 | 113.52  | 4.41  |
| -4 | 7 | 1 | 98.36   | 3.94  |
| -4 | 7 | 1 | 104.53  | 3.20  |
| -4 | 7 | 1 | 103.88  | 4.08  |
| -4 | 7 | 1 | 103.52  | 3.69  |
| -4 | 7 | 2 | 347.39  | 7.42  |
| -4 | 7 | 2 | 332.84  | 7.61  |
| -4 | 7 | 2 | 345.49  | 8.03  |
| -4 | 7 | 2 | 358.67  | 6.26  |
| -4 | 7 | 2 | 347.82  | 6.53  |
| -4 | 7 | 2 | 353.79  | 5.58  |
| -4 | 7 | 2 | 351.32  | 8.41  |
| -4 | 7 | 2 | 324.15  | 7.95  |
| -4 | 7 | 2 | 324.20  | 7.80  |
| -4 | 7 | 2 | 366.44  | 6.39  |
| -4 | 7 | 2 | 349.39  | 8.03  |
| -4 | 7 | 2 | 353.05  | 7.68  |
| -4 | 7 | 2 | 332.04  | 7.64  |
| -4 | 7 | 2 | 375.64  | 8.24  |
| -4 | 7 | 2 | 354.06  | 8.28  |
| -4 | 7 | 3 | 879.19  | 14.10 |
| -4 | 7 | 3 | 978.19  | 11.83 |
| -4 | 7 | 3 | 866.01  | 11.40 |
| -4 | 7 | 3 | 882.72  | 14.60 |
| -4 | 7 | 3 | 876.81  | 14.05 |
| -4 | 7 | 3 | 941.56  | 12.15 |
| -4 | 7 | 3 | 876.57  | 13.42 |
| -4 | 7 | 3 | 881.55  | 14.11 |
| -4 | 7 | 3 | 936.87  | 10.99 |
| -4 | 7 | 3 | 838.05  | 12.80 |
| -4 | 7 | 3 | 812.14  | 12.05 |
| -4 | 7 | 3 | 904.41  | 14.38 |
| -4 | 7 | 4 | 2177.78 | 22.44 |
| -4 | 7 | 4 | 2017.01 | 25.19 |
| -4 | 7 | 4 | 2086.18 | 25.34 |

## CIF 31

|    |   |   |         |       |
|----|---|---|---------|-------|
| -4 | 7 | 4 | 1883.15 | 24.08 |
| -4 | 7 | 4 | 2037.06 | 21.34 |
| -4 | 7 | 4 | 1985.42 | 23.51 |
| -4 | 7 | 4 | 2079.51 | 21.31 |
| -4 | 7 | 4 | 1965.92 | 24.69 |
| -4 | 7 | 4 | 2006.93 | 20.72 |
| -4 | 7 | 4 | 2024.91 | 25.30 |
| -4 | 7 | 4 | 1973.87 | 23.26 |
| -4 | 7 | 4 | 2088.49 | 25.88 |
| -4 | 7 | 4 | 2057.09 | 25.59 |
| -4 | 7 | 5 | 98.39   | 3.11  |
| -4 | 7 | 5 | 95.03   | 3.44  |
| -4 | 7 | 5 | 83.61   | 3.51  |
| -4 | 7 | 5 | 72.31   | 2.72  |
| -4 | 7 | 5 | 86.00   | 4.17  |
| -4 | 7 | 5 | 82.67   | 3.90  |
| -4 | 7 | 5 | 89.09   | 4.47  |
| -4 | 7 | 5 | 92.92   | 4.42  |
| -4 | 7 | 5 | 89.40   | 3.02  |
| -4 | 7 | 5 | 78.38   | 3.72  |
| -4 | 7 | 5 | 85.92   | 4.31  |
| -4 | 7 | 5 | 87.56   | 3.89  |
| -4 | 7 | 5 | 97.84   | 4.53  |
| -4 | 7 | 6 | 2297.62 | 24.64 |
| -4 | 7 | 6 | 2117.41 | 26.62 |
| -4 | 7 | 6 | 2138.39 | 26.80 |
| -4 | 7 | 6 | 2156.61 | 26.31 |
| -4 | 7 | 6 | 2095.97 | 27.11 |
| -4 | 7 | 6 | 2202.71 | 22.14 |
| -4 | 7 | 6 | 1983.65 | 26.00 |
| -4 | 7 | 6 | 1938.16 | 24.31 |
| -4 | 7 | 6 | 2274.50 | 23.90 |
| -4 | 7 | 6 | 2153.41 | 22.59 |
| -4 | 7 | 6 | 2130.67 | 25.70 |
| -4 | 7 | 6 | 2095.22 | 26.48 |
| -4 | 7 | 6 | 2085.39 | 26.76 |
| -4 | 7 | 7 | 186.78  | 5.11  |
| -4 | 7 | 7 | 172.98  | 5.98  |
| -4 | 7 | 7 | 182.30  | 6.37  |
| -4 | 7 | 7 | 160.02  | 5.75  |
| -4 | 7 | 7 | 166.09  | 5.68  |

## CIF 31

|    |   |     |        |       |
|----|---|-----|--------|-------|
| -4 | 7 | 7   | 165.85 | 5.81  |
| -4 | 7 | 7   | 185.47 | 4.68  |
| -4 | 7 | 7   | 166.45 | 5.85  |
| -4 | 7 | 7   | 193.79 | 5.45  |
| -4 | 7 | 7   | 169.45 | 6.12  |
| -4 | 7 | 8   | 565.77 | 10.58 |
| -4 | 7 | 8   | 629.22 | 9.87  |
| -4 | 7 | 8   | 549.05 | 11.62 |
| -4 | 7 | 8   | 500.39 | 9.88  |
| -4 | 7 | 8   | 485.32 | 10.47 |
| -4 | 7 | 8   | 588.61 | 10.02 |
| -4 | 7 | 8   | 515.19 | 10.61 |
| -4 | 7 | 8   | 492.07 | 9.82  |
| -4 | 7 | 8   | 538.68 | 10.63 |
| -4 | 7 | 9   | 1.38   | 0.75  |
| -4 | 7 | 9   | 2.27   | 1.40  |
| -4 | 7 | 9   | -0.11  | 1.21  |
| -4 | 7 | 9   | 1.00   | 1.09  |
| -4 | 7 | 9   | 1.20   | 0.77  |
| -4 | 7 | 9   | 1.37   | 1.02  |
| -4 | 7 | 9   | 0.17   | 1.03  |
| -4 | 7 | 9   | 0.39   | 1.00  |
| -4 | 7 | 10  | 26.91  | 2.17  |
| -4 | 7 | 10  | 28.50  | 2.27  |
| -4 | 7 | 10  | 26.49  | 2.27  |
| -4 | 7 | 10  | 29.60  | 2.40  |
| -4 | 7 | 10  | 28.85  | 2.22  |
| -4 | 7 | 11  | 39.20  | 2.15  |
| -4 | 7 | 11  | 42.90  | 2.33  |
| -4 | 7 | 12  | 4.45   | 0.66  |
| -4 | 8 | -12 | 106.17 | 2.50  |
| -4 | 8 | -11 | 191.66 | 4.35  |
| -4 | 8 | -11 | 191.32 | 4.47  |
| -4 | 8 | -11 | 197.18 | 5.54  |
| -4 | 8 | -10 | 16.30  | 1.61  |
| -4 | 8 | -10 | 15.09  | 4.16  |
| -4 | 8 | -10 | 12.15  | 1.51  |
| -4 | 8 | -10 | 15.73  | 1.35  |
| -4 | 8 | -10 | 15.17  | 1.49  |
| -4 | 8 | -9  | 119.95 | 4.47  |
| -4 | 8 | -9  | 123.87 | 5.40  |

## CIF 31

|    |   |    |        |      |
|----|---|----|--------|------|
| -4 | 8 | -9 | 133.55 | 5.02 |
| -4 | 8 | -9 | 134.83 | 5.54 |
| -4 | 8 | -9 | 150.58 | 4.41 |
| -4 | 8 | -9 | 133.35 | 4.50 |
| -4 | 8 | -9 | 151.35 | 4.38 |
| -4 | 8 | -8 | 219.31 | 6.12 |
| -4 | 8 | -8 | 213.07 | 6.29 |
| -4 | 8 | -8 | 224.33 | 7.71 |
| -4 | 8 | -8 | 229.69 | 7.11 |
| -4 | 8 | -8 | 245.24 | 7.86 |
| -4 | 8 | -8 | 222.25 | 6.05 |
| -4 | 8 | -8 | 240.35 | 5.68 |
| -4 | 8 | -8 | 223.01 | 5.59 |
| -4 | 8 | -7 | 284.48 | 7.07 |
| -4 | 8 | -7 | 298.66 | 8.87 |
| -4 | 8 | -7 | 267.29 | 7.31 |
| -4 | 8 | -7 | 267.38 | 6.65 |
| -4 | 8 | -7 | 277.11 | 6.89 |
| -4 | 8 | -7 | 310.60 | 6.47 |
| -4 | 8 | -7 | 290.11 | 6.76 |
| -4 | 8 | -7 | 313.75 | 6.61 |
| -4 | 8 | -7 | 275.95 | 8.11 |
| -4 | 8 | -7 | 278.46 | 8.62 |
| -4 | 8 | -6 | 11.83  | 1.99 |
| -4 | 8 | -6 | 13.19  | 1.56 |
| -4 | 8 | -6 | 14.56  | 1.65 |
| -4 | 8 | -6 | 17.79  | 2.31 |
| -4 | 8 | -6 | 14.61  | 1.96 |
| -4 | 8 | -6 | 13.32  | 2.31 |
| -4 | 8 | -6 | 14.25  | 2.41 |
| -4 | 8 | -6 | 10.94  | 1.98 |
| -4 | 8 | -6 | 13.45  | 1.93 |
| -4 | 8 | -6 | 12.13  | 1.58 |
| -4 | 8 | -6 | 10.23  | 1.35 |
| -4 | 8 | -5 | 1.15   | 1.30 |
| -4 | 8 | -5 | 3.40   | 1.64 |
| -4 | 8 | -5 | 0.78   | 1.22 |
| -4 | 8 | -5 | 0.86   | 1.39 |
| -4 | 8 | -5 | 1.11   | 0.88 |
| -4 | 8 | -5 | 0.31   | 0.97 |
| -4 | 8 | -5 | 0.59   | 0.83 |

## CIF 31

|    |   |    |         |       |
|----|---|----|---------|-------|
| -4 | 8 | -4 | 20.02   | 1.76  |
| -4 | 8 | -4 | 28.51   | 2.73  |
| -4 | 8 | -4 | 22.67   | 1.84  |
| -4 | 8 | -4 | 23.63   | 2.74  |
| -4 | 8 | -4 | 29.81   | 2.88  |
| -4 | 8 | -4 | 23.47   | 2.49  |
| -4 | 8 | -4 | 20.97   | 1.88  |
| -4 | 8 | -4 | 18.07   | 1.72  |
| -4 | 8 | -4 | 23.27   | 2.43  |
| -4 | 8 | -4 | 23.58   | 2.21  |
| -4 | 8 | -3 | 387.79  | 6.96  |
| -4 | 8 | -3 | 382.97  | 7.56  |
| -4 | 8 | -3 | 417.27  | 8.46  |
| -4 | 8 | -3 | 458.87  | 10.18 |
| -4 | 8 | -3 | 366.51  | 9.16  |
| -4 | 8 | -3 | 411.56  | 9.08  |
| -4 | 8 | -3 | 421.93  | 8.40  |
| -4 | 8 | -2 | 681.42  | 12.86 |
| -4 | 8 | -2 | 618.00  | 12.04 |
| -4 | 8 | -2 | 635.77  | 11.04 |
| -4 | 8 | -2 | 653.99  | 11.29 |
| -4 | 8 | -2 | 599.76  | 11.66 |
| -4 | 8 | -2 | 647.74  | 10.66 |
| -4 | 8 | -2 | 587.08  | 11.46 |
| -4 | 8 | -2 | 622.44  | 11.08 |
| -4 | 8 | -2 | 614.76  | 9.87  |
| -4 | 8 | -2 | 646.88  | 9.87  |
| -4 | 8 | -2 | 606.02  | 9.99  |
| -4 | 8 | -1 | 16.50   | 1.88  |
| -4 | 8 | -1 | 19.31   | 2.18  |
| -4 | 8 | -1 | 18.92   | 2.37  |
| -4 | 8 | -1 | 19.06   | 1.97  |
| -4 | 8 | -1 | 15.91   | 1.52  |
| -4 | 8 | -1 | 17.35   | 1.54  |
| -4 | 8 | -1 | 17.68   | 2.05  |
| -4 | 8 | -1 | 16.53   | 2.08  |
| -4 | 8 | -1 | 20.23   | 2.15  |
| -4 | 8 | -1 | 19.02   | 1.84  |
| -4 | 8 | 0  | 1377.69 | 19.09 |
| -4 | 8 | 0  | 1361.93 | 19.80 |
| -4 | 8 | 0  | 1328.35 | 16.28 |

## CIF 31

|    |   |   |         |       |
|----|---|---|---------|-------|
| -4 | 8 | 0 | 1344.42 | 18.62 |
| -4 | 8 | 0 | 1299.53 | 17.00 |
| -4 | 8 | 0 | 1335.19 | 18.62 |
| -4 | 8 | 0 | 1377.49 | 19.02 |
| -4 | 8 | 0 | 1343.71 | 18.13 |
| -4 | 8 | 0 | 1328.59 | 15.74 |
| -4 | 8 | 0 | 1345.34 | 18.70 |
| -4 | 8 | 0 | 1378.82 | 18.98 |
| -4 | 8 | 0 | 1236.91 | 18.64 |
| -4 | 8 | 0 | 1258.02 | 17.45 |
| -4 | 8 | 1 | 72.03   | 3.56  |
| -4 | 8 | 1 | 66.67   | 3.15  |
| -4 | 8 | 1 | 62.75   | 3.49  |
| -4 | 8 | 1 | 52.84   | 2.62  |
| -4 | 8 | 1 | 75.56   | 4.13  |
| -4 | 8 | 1 | 56.20   | 2.92  |
| -4 | 8 | 1 | 58.66   | 3.51  |
| -4 | 8 | 1 | 64.41   | 3.33  |
| -4 | 8 | 1 | 78.00   | 3.82  |
| -4 | 8 | 1 | 75.92   | 3.98  |
| -4 | 8 | 1 | 64.78   | 3.70  |
| -4 | 8 | 1 | 64.74   | 2.65  |
| -4 | 8 | 1 | 62.27   | 3.49  |
| -4 | 8 | 1 | 49.69   | 2.72  |
| -4 | 8 | 1 | 57.90   | 3.36  |
| -4 | 8 | 2 | 119.34  | 5.07  |
| -4 | 8 | 2 | 115.62  | 4.42  |
| -4 | 8 | 2 | 121.84  | 5.04  |
| -4 | 8 | 2 | 127.36  | 4.82  |
| -4 | 8 | 2 | 117.48  | 4.67  |
| -4 | 8 | 2 | 123.85  | 4.05  |
| -4 | 8 | 2 | 110.17  | 4.79  |
| -4 | 8 | 2 | 118.49  | 4.75  |
| -4 | 8 | 2 | 136.60  | 5.19  |
| -4 | 8 | 2 | 116.30  | 5.03  |
| -4 | 8 | 2 | 106.03  | 4.91  |
| -4 | 8 | 2 | 112.41  | 3.53  |
| -4 | 8 | 2 | 124.03  | 5.02  |
| -4 | 8 | 2 | 114.98  | 4.07  |
| -4 | 8 | 3 | 887.55  | 14.58 |
| -4 | 8 | 3 | 1056.72 | 13.93 |

## CIF 31

|    |   |   |         |       |
|----|---|---|---------|-------|
| -4 | 8 | 3 | 939.04  | 14.40 |
| -4 | 8 | 3 | 985.57  | 16.29 |
| -4 | 8 | 3 | 1071.21 | 14.36 |
| -4 | 8 | 3 | 1018.91 | 15.83 |
| -4 | 8 | 3 | 945.22  | 12.45 |
| -4 | 8 | 3 | 1045.71 | 16.35 |
| -4 | 8 | 3 | 999.83  | 15.27 |
| -4 | 8 | 3 | 958.37  | 15.92 |
| -4 | 8 | 3 | 1000.36 | 16.21 |
| -4 | 8 | 4 | 349.73  | 8.07  |
| -4 | 8 | 4 | 348.08  | 8.67  |
| -4 | 8 | 4 | 344.61  | 8.55  |
| -4 | 8 | 4 | 343.85  | 8.91  |
| -4 | 8 | 4 | 371.24  | 7.39  |
| -4 | 8 | 4 | 323.53  | 7.40  |
| -4 | 8 | 4 | 382.40  | 9.34  |
| -4 | 8 | 4 | 361.24  | 9.11  |
| -4 | 8 | 4 | 371.88  | 9.05  |
| -4 | 8 | 4 | 356.71  | 6.49  |
| -4 | 8 | 4 | 366.09  | 9.42  |
| -4 | 8 | 4 | 356.60  | 7.66  |
| -4 | 8 | 4 | 345.48  | 9.07  |
| -4 | 8 | 5 | 653.26  | 12.61 |
| -4 | 8 | 5 | 655.14  | 12.74 |
| -4 | 8 | 5 | 642.42  | 12.47 |
| -4 | 8 | 5 | 609.94  | 12.61 |
| -4 | 8 | 5 | 655.92  | 12.93 |
| -4 | 8 | 5 | 619.27  | 11.77 |
| -4 | 8 | 5 | 692.50  | 10.87 |
| -4 | 8 | 5 | 664.70  | 12.91 |
| -4 | 8 | 5 | 692.46  | 11.26 |
| -4 | 8 | 5 | 610.91  | 11.18 |
| -4 | 8 | 6 | 420.31  | 10.08 |
| -4 | 8 | 6 | 456.70  | 10.15 |
| -4 | 8 | 6 | 469.58  | 10.67 |
| -4 | 8 | 6 | 474.41  | 8.67  |
| -4 | 8 | 6 | 433.08  | 9.32  |
| -4 | 8 | 6 | 441.39  | 9.99  |
| -4 | 8 | 6 | 454.42  | 10.36 |
| -4 | 8 | 6 | 398.23  | 8.71  |
| -4 | 8 | 6 | 484.49  | 9.10  |

## CIF 31

|    |   |     |        |       |
|----|---|-----|--------|-------|
| -4 | 8 | 6   | 444.75 | 10.01 |
| -4 | 8 | 6   | 459.97 | 10.32 |
| -4 | 8 | 7   | 143.60 | 5.28  |
| -4 | 8 | 7   | 173.64 | 5.75  |
| -4 | 8 | 7   | 178.34 | 5.88  |
| -4 | 8 | 7   | 189.71 | 5.09  |
| -4 | 8 | 7   | 168.92 | 5.85  |
| -4 | 8 | 7   | 175.29 | 6.18  |
| -4 | 8 | 7   | 205.56 | 5.48  |
| -4 | 8 | 7   | 155.43 | 5.32  |
| -4 | 8 | 7   | 156.13 | 5.83  |
| -4 | 8 | 8   | 235.20 | 6.04  |
| -4 | 8 | 8   | 229.39 | 6.81  |
| -4 | 8 | 8   | 249.76 | 6.98  |
| -4 | 8 | 8   | 216.51 | 5.81  |
| -4 | 8 | 8   | 253.65 | 7.11  |
| -4 | 8 | 8   | 240.54 | 6.38  |
| -4 | 8 | 8   | 249.47 | 6.52  |
| -4 | 8 | 8   | 232.14 | 6.66  |
| -4 | 8 | 9   | 0.59   | 1.24  |
| -4 | 8 | 9   | -0.09  | 0.99  |
| -4 | 8 | 9   | -0.42  | 0.99  |
| -4 | 8 | 9   | 0.40   | 0.77  |
| -4 | 8 | 9   | 0.61   | 0.82  |
| -4 | 8 | 10  | 1.40   | 0.82  |
| -4 | 8 | 10  | 0.90   | 0.74  |
| -4 | 8 | 10  | 1.37   | 0.88  |
| -4 | 9 | -11 | 12.96  | 1.19  |
| -4 | 9 | -11 | 10.72  | 0.98  |
| -4 | 9 | -10 | 12.26  | 1.32  |
| -4 | 9 | -10 | 19.59  | 1.54  |
| -4 | 9 | -9  | 8.32   | 1.31  |
| -4 | 9 | -9  | 12.16  | 1.95  |
| -4 | 9 | -9  | 13.03  | 2.00  |
| -4 | 9 | -9  | 20.32  | 1.74  |
| -4 | 9 | -9  | 10.56  | 1.67  |
| -4 | 9 | -9  | 17.22  | 1.48  |
| -4 | 9 | -9  | 22.17  | 3.43  |
| -4 | 9 | -8  | 8.27   | 1.29  |
| -4 | 9 | -8  | 8.18   | 1.22  |
| -4 | 9 | -8  | 7.96   | 1.26  |



## CIF 31

|    |   |    |        |      |
|----|---|----|--------|------|
| -4 | 9 | -8 | 9.85   | 2.00 |
| -4 | 9 | -8 | 7.53   | 1.80 |
| -4 | 9 | -8 | 9.38   | 1.71 |
| -4 | 9 | -8 | 8.15   | 1.31 |
| -4 | 9 | -8 | 8.16   | 2.82 |
| -4 | 9 | -7 | 35.75  | 2.71 |
| -4 | 9 | -7 | 37.82  | 2.76 |
| -4 | 9 | -7 | 54.25  | 2.58 |
| -4 | 9 | -7 | 40.50  | 3.51 |
| -4 | 9 | -7 | 50.91  | 2.83 |
| -4 | 9 | -7 | 61.72  | 2.87 |
| -4 | 9 | -7 | 39.91  | 3.20 |
| -4 | 9 | -7 | 39.29  | 3.58 |
| -4 | 9 | -7 | 58.92  | 3.15 |
| -4 | 9 | -6 | 83.58  | 4.26 |
| -4 | 9 | -6 | 79.00  | 3.48 |
| -4 | 9 | -6 | 88.20  | 5.01 |
| -4 | 9 | -6 | 88.65  | 4.68 |
| -4 | 9 | -6 | 78.42  | 3.50 |
| -4 | 9 | -6 | 71.60  | 4.50 |
| -4 | 9 | -6 | 82.64  | 3.12 |
| -4 | 9 | -6 | 92.33  | 4.41 |
| -4 | 9 | -5 | 167.79 | 4.78 |
| -4 | 9 | -5 | 184.22 | 6.46 |
| -4 | 9 | -5 | 146.51 | 6.38 |
| -4 | 9 | -5 | 176.23 | 6.56 |
| -4 | 9 | -5 | 173.54 | 6.59 |
| -4 | 9 | -5 | 159.25 | 5.47 |
| -4 | 9 | -5 | 179.66 | 4.64 |
| -4 | 9 | -4 | 14.92  | 1.61 |
| -4 | 9 | -4 | 15.22  | 2.26 |
| -4 | 9 | -4 | 14.21  | 2.21 |
| -4 | 9 | -4 | 14.34  | 1.49 |
| -4 | 9 | -4 | 17.52  | 2.51 |
| -4 | 9 | -4 | 16.86  | 1.76 |
| -4 | 9 | -4 | 17.30  | 2.39 |
| -4 | 9 | -4 | 17.36  | 2.08 |
| -4 | 9 | -3 | 56.41  | 2.89 |
| -4 | 9 | -3 | 60.14  | 3.96 |
| -4 | 9 | -3 | 61.63  | 4.12 |
| -4 | 9 | -3 | 49.78  | 2.30 |

## CIF 31

|    |   |    |        |       |
|----|---|----|--------|-------|
| -4 | 9 | -3 | 52.10  | 3.06  |
| -4 | 9 | -3 | 52.93  | 2.78  |
| -4 | 9 | -3 | 57.86  | 3.94  |
| -4 | 9 | -3 | 59.04  | 3.28  |
| -4 | 9 | -3 | 54.38  | 3.46  |
| -4 | 9 | -2 | 119.60 | 4.25  |
| -4 | 9 | -2 | 128.16 | 4.86  |
| -4 | 9 | -2 | 138.86 | 5.15  |
| -4 | 9 | -2 | 148.51 | 6.06  |
| -4 | 9 | -2 | 140.97 | 5.82  |
| -4 | 9 | -2 | 133.57 | 5.65  |
| -4 | 9 | -2 | 130.44 | 4.97  |
| -4 | 9 | -2 | 121.41 | 4.07  |
| -4 | 9 | -2 | 121.61 | 5.15  |
| -4 | 9 | -2 | 127.27 | 4.58  |
| -4 | 9 | -1 | 378.90 | 9.49  |
| -4 | 9 | -1 | 379.76 | 8.86  |
| -4 | 9 | -1 | 367.07 | 7.87  |
| -4 | 9 | -1 | 380.05 | 9.13  |
| -4 | 9 | -1 | 373.96 | 9.49  |
| -4 | 9 | -1 | 365.92 | 7.24  |
| -4 | 9 | -1 | 358.14 | 9.16  |
| -4 | 9 | -1 | 374.28 | 7.67  |
| -4 | 9 | -1 | 378.60 | 8.94  |
| -4 | 9 | -1 | 371.12 | 8.43  |
| -4 | 9 | -1 | 353.00 | 7.88  |
| -4 | 9 | 0  | 434.51 | 10.07 |
| -4 | 9 | 0  | 436.70 | 9.93  |
| -4 | 9 | 0  | 393.05 | 9.85  |
| -4 | 9 | 0  | 428.40 | 8.64  |
| -4 | 9 | 0  | 428.00 | 9.94  |
| -4 | 9 | 0  | 405.72 | 7.65  |
| -4 | 9 | 0  | 447.75 | 10.88 |
| -4 | 9 | 0  | 451.92 | 10.01 |
| -4 | 9 | 0  | 412.89 | 9.65  |
| -4 | 9 | 0  | 414.77 | 8.50  |
| -4 | 9 | 0  | 440.30 | 9.52  |
| -4 | 9 | 0  | 451.01 | 10.08 |
| -4 | 9 | 0  | 447.88 | 8.52  |
| -4 | 9 | 0  | 448.66 | 9.63  |
| -4 | 9 | 0  | 431.21 | 9.21  |

## CIF 31

|    |   |   |         |       |
|----|---|---|---------|-------|
| -4 | 9 | 1 | 517.71  | 11.54 |
| -4 | 9 | 1 | 465.24  | 10.76 |
| -4 | 9 | 1 | 537.41  | 11.02 |
| -4 | 9 | 1 | 484.91  | 8.91  |
| -4 | 9 | 1 | 482.17  | 10.53 |
| -4 | 9 | 1 | 470.64  | 9.64  |
| -4 | 9 | 1 | 470.14  | 10.66 |
| -4 | 9 | 1 | 448.66  | 8.95  |
| -4 | 9 | 1 | 491.08  | 8.36  |
| -4 | 9 | 1 | 453.95  | 10.31 |
| -4 | 9 | 1 | 445.44  | 9.83  |
| -4 | 9 | 1 | 476.19  | 10.63 |
| -4 | 9 | 2 | 1431.22 | 20.70 |
| -4 | 9 | 2 | 1431.55 | 20.08 |
| -4 | 9 | 2 | 1377.71 | 18.74 |
| -4 | 9 | 2 | 1529.65 | 18.50 |
| -4 | 9 | 2 | 1523.21 | 21.17 |
| -4 | 9 | 2 | 1346.69 | 19.37 |
| -4 | 9 | 2 | 1418.38 | 21.25 |
| -4 | 9 | 2 | 1405.11 | 18.87 |
| -4 | 9 | 2 | 1419.53 | 20.71 |
| -4 | 9 | 2 | 1365.99 | 20.84 |
| -4 | 9 | 2 | 1370.80 | 19.63 |
| -4 | 9 | 2 | 1591.97 | 17.29 |
| -4 | 9 | 2 | 1447.53 | 21.15 |
| -4 | 9 | 2 | 1476.70 | 18.53 |
| -4 | 9 | 2 | 1445.50 | 20.30 |
| -4 | 9 | 3 | 106.37  | 4.73  |
| -4 | 9 | 3 | 107.53  | 4.97  |
| -4 | 9 | 3 | 95.32   | 3.77  |
| -4 | 9 | 3 | 104.22  | 4.30  |
| -4 | 9 | 3 | 101.88  | 4.88  |
| -4 | 9 | 3 | 104.98  | 4.46  |
| -4 | 9 | 3 | 120.63  | 5.28  |
| -4 | 9 | 3 | 104.60  | 4.58  |
| -4 | 9 | 3 | 95.81   | 3.22  |
| -4 | 9 | 3 | 105.49  | 4.78  |
| -4 | 9 | 3 | 101.10  | 3.98  |
| -4 | 9 | 4 | 1279.56 | 19.15 |
| -4 | 9 | 4 | 1279.44 | 16.33 |
| -4 | 9 | 4 | 1089.69 | 17.51 |

## CIF 31

|    |    |     |         |       |
|----|----|-----|---------|-------|
| -4 | 9  | 4   | 1145.34 | 17.68 |
| -4 | 9  | 4   | 1261.79 | 18.30 |
| -4 | 9  | 4   | 1301.91 | 18.94 |
| -4 | 9  | 4   | 1201.99 | 19.04 |
| -4 | 9  | 4   | 1241.63 | 19.00 |
| -4 | 9  | 4   | 1331.75 | 16.82 |
| -4 | 9  | 4   | 1169.38 | 18.57 |
| -4 | 9  | 4   | 1275.91 | 18.95 |
| -4 | 9  | 5   | 309.32  | 8.41  |
| -4 | 9  | 5   | 311.90  | 6.86  |
| -4 | 9  | 5   | 279.82  | 7.66  |
| -4 | 9  | 5   | 293.21  | 8.08  |
| -4 | 9  | 5   | 298.20  | 8.14  |
| -4 | 9  | 5   | 275.07  | 7.83  |
| -4 | 9  | 5   | 261.08  | 7.16  |
| -4 | 9  | 5   | 315.38  | 6.99  |
| -4 | 9  | 5   | 295.83  | 8.26  |
| -4 | 9  | 6   | 27.11   | 2.54  |
| -4 | 9  | 6   | 30.41   | 2.54  |
| -4 | 9  | 6   | 31.94   | 2.71  |
| -4 | 9  | 6   | 26.75   | 2.41  |
| -4 | 9  | 6   | 26.64   | 2.46  |
| -4 | 9  | 6   | 27.86   | 2.60  |
| -4 | 9  | 6   | 29.53   | 2.03  |
| -4 | 9  | 6   | 31.29   | 2.76  |
| -4 | 9  | 6   | 29.06   | 2.03  |
| -4 | 9  | 7   | 480.24  | 9.48  |
| -4 | 9  | 7   | 456.07  | 9.39  |
| -4 | 9  | 7   | 458.94  | 9.62  |
| -4 | 9  | 7   | 427.25  | 8.65  |
| -4 | 9  | 7   | 430.82  | 8.78  |
| -4 | 9  | 7   | 474.95  | 9.36  |
| -4 | 9  | 7   | 447.17  | 9.30  |
| -4 | 9  | 8   | 16.40   | 1.61  |
| -4 | 9  | 8   | 17.11   | 1.79  |
| -4 | 9  | 8   | 14.60   | 1.76  |
| -4 | 9  | 8   | 16.48   | 1.65  |
| -4 | 9  | 9   | 90.84   | 2.91  |
| -4 | 9  | 9   | 90.34   | 3.09  |
| -4 | 9  | 9   | 86.48   | 3.07  |
| -4 | 10 | -11 | 1.48    | 0.56  |

## CIF 31

|    |    |     |        |      |
|----|----|-----|--------|------|
| -4 | 10 | -10 | 171.91 | 3.47 |
| -4 | 10 | -10 | 179.99 | 3.94 |
| -4 | 10 | -10 | 171.27 | 3.60 |
| -4 | 10 | -9  | 4.53   | 1.43 |
| -4 | 10 | -9  | 6.50   | 1.53 |
| -4 | 10 | -9  | 6.30   | 1.30 |
| -4 | 10 | -9  | 9.29   | 0.93 |
| -4 | 10 | -8  | 14.17  | 2.16 |
| -4 | 10 | -8  | 21.00  | 2.42 |
| -4 | 10 | -8  | 15.22  | 1.93 |
| -4 | 10 | -8  | 15.72  | 1.50 |
| -4 | 10 | -8  | 14.70  | 1.24 |
| -4 | 10 | -8  | 13.55  | 1.80 |
| -4 | 10 | -7  | 153.96 | 5.76 |
| -4 | 10 | -7  | 155.27 | 6.22 |
| -4 | 10 | -7  | 144.49 | 5.12 |
| -4 | 10 | -7  | 145.83 | 4.74 |
| -4 | 10 | -7  | 148.77 | 4.25 |
| -4 | 10 | -7  | 143.90 | 6.16 |
| -4 | 10 | -7  | 135.31 | 3.63 |
| -4 | 10 | -7  | 148.88 | 5.12 |
| -4 | 10 | -7  | 129.20 | 4.04 |
| -4 | 10 | -6  | 3.23   | 1.06 |
| -4 | 10 | -6  | 3.72   | 1.48 |
| -4 | 10 | -6  | 3.60   | 1.60 |
| -4 | 10 | -6  | 4.19   | 1.44 |
| -4 | 10 | -6  | 3.35   | 0.87 |
| -4 | 10 | -5  | 139.44 | 6.02 |
| -4 | 10 | -5  | 143.44 | 5.72 |
| -4 | 10 | -5  | 133.41 | 5.67 |
| -4 | 10 | -5  | 134.89 | 6.20 |
| -4 | 10 | -5  | 158.56 | 4.24 |
| -4 | 10 | -5  | 162.42 | 4.97 |
| -4 | 10 | -5  | 148.52 | 3.87 |
| -4 | 10 | -5  | 136.59 | 5.10 |
| -4 | 10 | -5  | 138.54 | 5.85 |
| -4 | 10 | -4  | 299.63 | 8.61 |
| -4 | 10 | -4  | 305.14 | 8.83 |
| -4 | 10 | -4  | 298.43 | 6.90 |
| -4 | 10 | -4  | 291.25 | 6.80 |
| -4 | 10 | -4  | 305.47 | 8.89 |

## CIF 31

|    |    |    |        |       |
|----|----|----|--------|-------|
| -4 | 10 | -4 | 302.14 | 9.08  |
| -4 | 10 | -4 | 317.36 | 5.88  |
| -4 | 10 | -4 | 298.74 | 7.97  |
| -4 | 10 | -4 | 291.95 | 5.70  |
| -4 | 10 | -3 | 8.92   | 1.36  |
| -4 | 10 | -3 | 8.63   | 1.66  |
| -4 | 10 | -3 | 10.13  | 1.42  |
| -4 | 10 | -3 | 9.47   | 2.13  |
| -4 | 10 | -3 | 11.42  | 2.05  |
| -4 | 10 | -3 | 10.14  | 2.06  |
| -4 | 10 | -3 | 9.96   | 1.59  |
| -4 | 10 | -3 | 8.50   | 1.65  |
| -4 | 10 | -2 | 50.41  | 3.34  |
| -4 | 10 | -2 | 48.71  | 3.56  |
| -4 | 10 | -2 | 52.00  | 3.53  |
| -4 | 10 | -2 | 51.99  | 3.93  |
| -4 | 10 | -2 | 50.10  | 3.46  |
| -4 | 10 | -2 | 53.40  | 3.01  |
| -4 | 10 | -2 | 50.62  | 3.14  |
| -4 | 10 | -2 | 47.47  | 2.62  |
| -4 | 10 | -2 | 51.32  | 3.74  |
| -4 | 10 | -2 | 54.49  | 2.90  |
| -4 | 10 | -1 | 411.62 | 10.14 |
| -4 | 10 | -1 | 398.76 | 9.31  |
| -4 | 10 | -1 | 367.98 | 7.90  |
| -4 | 10 | -1 | 399.59 | 9.40  |
| -4 | 10 | -1 | 420.39 | 9.87  |
| -4 | 10 | -1 | 426.38 | 9.92  |
| -4 | 10 | -1 | 408.55 | 9.85  |
| -4 | 10 | -1 | 402.14 | 9.34  |
| -4 | 10 | -1 | 380.79 | 7.62  |
| -4 | 10 | -1 | 398.87 | 8.32  |
| -4 | 10 | -1 | 421.00 | 9.07  |
| -4 | 10 | -1 | 375.23 | 8.16  |
| -4 | 10 | 0  | 22.71  | 2.43  |
| -4 | 10 | 0  | 24.56  | 1.99  |
| -4 | 10 | 0  | 21.33  | 2.43  |
| -4 | 10 | 0  | 19.22  | 2.26  |
| -4 | 10 | 0  | 19.95  | 2.06  |
| -4 | 10 | 0  | 21.16  | 2.38  |
| -4 | 10 | 0  | 19.75  | 2.15  |

## CIF 31

|    |    |   |        |      |
|----|----|---|--------|------|
| -4 | 10 | 0 | 19.94  | 2.42 |
| -4 | 10 | 0 | 21.03  | 1.69 |
| -4 | 10 | 0 | 20.37  | 1.91 |
| -4 | 10 | 0 | 20.94  | 2.32 |
| -4 | 10 | 0 | 19.69  | 2.39 |
| -4 | 10 | 0 | 16.30  | 2.52 |
| -4 | 10 | 0 | 21.90  | 2.13 |
| -4 | 10 | 1 | 34.18  | 2.91 |
| -4 | 10 | 1 | 31.32  | 2.99 |
| -4 | 10 | 1 | 32.11  | 2.30 |
| -4 | 10 | 1 | 32.82  | 2.64 |
| -4 | 10 | 1 | 29.31  | 2.62 |
| -4 | 10 | 1 | 33.26  | 2.90 |
| -4 | 10 | 1 | 31.81  | 2.83 |
| -4 | 10 | 1 | 35.83  | 2.89 |
| -4 | 10 | 1 | 29.62  | 1.89 |
| -4 | 10 | 1 | 35.34  | 3.18 |
| -4 | 10 | 1 | 31.36  | 2.28 |
| -4 | 10 | 1 | 27.09  | 2.79 |
| -4 | 10 | 1 | 33.57  | 2.50 |
| -4 | 10 | 2 | 88.16  | 4.12 |
| -4 | 10 | 2 | 110.17 | 4.03 |
| -4 | 10 | 2 | 102.86 | 4.95 |
| -4 | 10 | 2 | 91.10  | 4.72 |
| -4 | 10 | 2 | 104.21 | 4.03 |
| -4 | 10 | 2 | 115.52 | 5.04 |
| -4 | 10 | 2 | 97.57  | 4.27 |
| -4 | 10 | 2 | 115.87 | 4.85 |
| -4 | 10 | 2 | 95.09  | 4.68 |
| -4 | 10 | 2 | 112.52 | 4.88 |
| -4 | 10 | 2 | 100.40 | 4.82 |
| -4 | 10 | 2 | 115.05 | 4.15 |
| -4 | 10 | 2 | 95.83  | 4.46 |
| -4 | 10 | 3 | 387.14 | 8.87 |
| -4 | 10 | 3 | 377.75 | 8.13 |
| -4 | 10 | 3 | 413.36 | 9.55 |
| -4 | 10 | 3 | 410.94 | 8.08 |
| -4 | 10 | 3 | 363.18 | 9.07 |
| -4 | 10 | 3 | 382.09 | 8.26 |
| -4 | 10 | 3 | 408.98 | 9.72 |
| -4 | 10 | 3 | 398.63 | 9.41 |

## CIF 31

|    |    |     |        |      |
|----|----|-----|--------|------|
| -4 | 10 | 3   | 411.63 | 8.11 |
| -4 | 10 | 3   | 383.85 | 9.12 |
| -4 | 10 | 4   | 8.34   | 1.24 |
| -4 | 10 | 4   | 6.73   | 1.36 |
| -4 | 10 | 4   | 8.60   | 1.47 |
| -4 | 10 | 4   | 7.92   | 1.21 |
| -4 | 10 | 4   | 6.04   | 1.48 |
| -4 | 10 | 4   | 7.67   | 1.49 |
| -4 | 10 | 4   | 7.58   | 1.52 |
| -4 | 10 | 4   | 5.35   | 1.52 |
| -4 | 10 | 4   | 7.21   | 1.78 |
| -4 | 10 | 4   | 6.73   | 1.38 |
| -4 | 10 | 4   | 6.41   | 1.81 |
| -4 | 10 | 5   | 130.09 | 4.93 |
| -4 | 10 | 5   | 141.58 | 4.76 |
| -4 | 10 | 5   | 140.76 | 4.74 |
| -4 | 10 | 5   | 117.30 | 4.27 |
| -4 | 10 | 5   | 133.94 | 4.90 |
| -4 | 10 | 5   | 153.86 | 5.28 |
| -4 | 10 | 5   | 135.22 | 4.13 |
| -4 | 10 | 5   | 137.76 | 5.04 |
| -4 | 10 | 5   | 135.62 | 5.03 |
| -4 | 10 | 6   | 12.87  | 1.65 |
| -4 | 10 | 6   | 8.90   | 1.38 |
| -4 | 10 | 6   | 8.24   | 1.40 |
| -4 | 10 | 6   | 12.08  | 1.53 |
| -4 | 10 | 6   | 12.24  | 1.62 |
| -4 | 10 | 6   | 11.41  | 1.67 |
| -4 | 10 | 6   | 11.13  | 1.31 |
| -4 | 10 | 7   | 223.12 | 4.70 |
| -4 | 10 | 7   | 242.98 | 5.42 |
| -4 | 10 | 7   | 229.90 | 5.51 |
| -4 | 10 | 7   | 240.48 | 5.38 |
| -4 | 10 | 7   | 246.40 | 5.53 |
| -4 | 10 | 8   | 8.65   | 1.03 |
| -4 | 10 | 8   | 7.84   | 0.85 |
| -4 | 11 | -10 | 63.39  | 1.93 |
| -4 | 11 | -10 | 47.68  | 1.45 |
| -4 | 11 | -9  | 8.22   | 1.39 |
| -4 | 11 | -9  | 5.86   | 0.96 |
| -4 | 11 | -9  | 7.40   | 0.93 |



## CIF 31

|    |    |    |        |       |
|----|----|----|--------|-------|
| -4 | 11 | -8 | 196.61 | 5.61  |
| -4 | 11 | -8 | 206.87 | 6.24  |
| -4 | 11 | -8 | 211.03 | 6.34  |
| -4 | 11 | -7 | 77.12  | 4.18  |
| -4 | 11 | -7 | 78.84  | 3.33  |
| -4 | 11 | -7 | 78.95  | 3.51  |
| -4 | 11 | -7 | 80.92  | 3.97  |
| -4 | 11 | -7 | 89.48  | 3.04  |
| -4 | 11 | -6 | 76.29  | 4.07  |
| -4 | 11 | -6 | 75.29  | 3.64  |
| -4 | 11 | -6 | 70.91  | 4.07  |
| -4 | 11 | -6 | 71.72  | 3.76  |
| -4 | 11 | -5 | 423.94 | 9.88  |
| -4 | 11 | -5 | 420.30 | 10.16 |
| -4 | 11 | -5 | 415.52 | 9.28  |
| -4 | 11 | -5 | 411.63 | 9.59  |
| -4 | 11 | -5 | 395.00 | 9.74  |
| -4 | 11 | -4 | 136.58 | 5.71  |
| -4 | 11 | -4 | 123.17 | 5.56  |
| -4 | 11 | -4 | 131.47 | 5.48  |
| -4 | 11 | -4 | 146.12 | 5.97  |
| -4 | 11 | -4 | 131.42 | 4.22  |
| -4 | 11 | -4 | 132.61 | 4.99  |
| -4 | 11 | -3 | 115.10 | 4.07  |
| -4 | 11 | -3 | 126.89 | 5.36  |
| -4 | 11 | -3 | 104.77 | 5.02  |
| -4 | 11 | -3 | 124.82 | 5.24  |
| -4 | 11 | -3 | 126.58 | 5.66  |
| -4 | 11 | -3 | 113.10 | 3.89  |
| -4 | 11 | -3 | 117.73 | 4.50  |
| -4 | 11 | -3 | 117.44 | 4.78  |
| -4 | 11 | -2 | 11.34  | 2.20  |
| -4 | 11 | -2 | 16.02  | 1.67  |
| -4 | 11 | -2 | 14.96  | 2.26  |
| -4 | 11 | -2 | 14.57  | 1.98  |
| -4 | 11 | -2 | 16.36  | 1.51  |
| -4 | 11 | -2 | 14.17  | 1.76  |
| -4 | 11 | -2 | 13.72  | 1.87  |
| -4 | 11 | -2 | 15.25  | 2.06  |
| -4 | 11 | -2 | 15.80  | 2.04  |
| -4 | 11 | -1 | 347.54 | 8.09  |

## CIF 31

|    |    |    |        |       |
|----|----|----|--------|-------|
| -4 | 11 | -1 | 369.29 | 9.16  |
| -4 | 11 | -1 | 383.26 | 7.82  |
| -4 | 11 | -1 | 379.37 | 8.08  |
| -4 | 11 | -1 | 388.43 | 10.17 |
| -4 | 11 | -1 | 371.75 | 8.69  |
| -4 | 11 | -1 | 365.85 | 8.60  |
| -4 | 11 | -1 | 381.66 | 8.99  |
| -4 | 11 | -1 | 385.18 | 9.23  |
| -4 | 11 | 0  | 163.08 | 4.87  |
| -4 | 11 | 0  | 171.61 | 6.40  |
| -4 | 11 | 0  | 180.56 | 6.11  |
| -4 | 11 | 0  | 162.48 | 5.63  |
| -4 | 11 | 0  | 174.33 | 5.75  |
| -4 | 11 | 0  | 178.17 | 5.97  |
| -4 | 11 | 0  | 158.76 | 5.79  |
| -4 | 11 | 0  | 170.76 | 5.44  |
| -4 | 11 | 1  | 6.58   | 1.81  |
| -4 | 11 | 1  | 3.58   | 1.34  |
| -4 | 11 | 1  | 2.70   | 1.48  |
| -4 | 11 | 1  | 3.17   | 1.33  |
| -4 | 11 | 1  | 1.74   | 1.19  |
| -4 | 11 | 1  | 3.64   | 1.32  |
| -4 | 11 | 1  | 3.07   | 1.32  |
| -4 | 11 | 1  | 3.97   | 1.20  |
| -4 | 11 | 2  | 23.73  | 2.32  |
| -4 | 11 | 2  | 20.79  | 2.25  |
| -4 | 11 | 2  | 18.50  | 1.80  |
| -4 | 11 | 2  | 19.29  | 2.15  |
| -4 | 11 | 2  | 26.25  | 2.40  |
| -4 | 11 | 2  | 22.20  | 2.23  |
| -4 | 11 | 2  | 22.11  | 2.40  |
| -4 | 11 | 2  | 21.30  | 2.02  |
| -4 | 11 | 3  | 7.73   | 1.31  |
| -4 | 11 | 3  | 9.83   | 1.63  |
| -4 | 11 | 3  | 7.91   | 1.34  |
| -4 | 11 | 3  | 6.49   | 1.28  |
| -4 | 11 | 3  | 7.73   | 1.48  |
| -4 | 11 | 3  | 9.84   | 1.70  |
| -4 | 11 | 3  | 8.06   | 1.37  |
| -4 | 11 | 4  | 3.72   | 1.25  |
| -4 | 11 | 4  | 5.66   | 1.15  |

## CIF 31

|    |    |    |        |      |
|----|----|----|--------|------|
| -4 | 11 | 4  | 4.56   | 1.13 |
| -4 | 11 | 4  | 4.75   | 1.35 |
| -4 | 11 | 4  | 5.18   | 1.16 |
| -4 | 11 | 5  | 55.77  | 2.24 |
| -4 | 11 | 5  | 55.37  | 2.50 |
| -4 | 11 | 5  | 51.94  | 2.56 |
| -4 | 11 | 6  | 7.66   | 0.92 |
| -4 | 11 | 6  | 9.38   | 1.11 |
| -4 | 12 | -9 | 97.13  | 2.15 |
| -4 | 12 | -8 | 231.61 | 5.01 |
| -4 | 12 | -8 | 227.02 | 5.53 |
| -4 | 12 | -7 | 58.62  | 3.05 |
| -4 | 12 | -7 | 61.39  | 2.93 |
| -4 | 12 | -6 | 4.93   | 1.25 |
| -4 | 12 | -6 | 3.79   | 1.26 |
| -4 | 12 | -6 | 3.15   | 1.21 |
| -4 | 12 | -6 | 3.51   | 1.07 |
| -4 | 12 | -6 | 2.92   | 1.15 |
| -4 | 12 | -6 | 2.81   | 0.76 |
| -4 | 12 | -5 | 59.78  | 3.21 |
| -4 | 12 | -5 | 63.01  | 3.41 |
| -4 | 12 | -5 | 61.45  | 3.11 |
| -4 | 12 | -5 | 60.72  | 3.32 |
| -4 | 12 | -5 | 60.24  | 3.33 |
| -4 | 12 | -4 | 43.33  | 2.83 |
| -4 | 12 | -4 | 40.49  | 2.99 |
| -4 | 12 | -4 | 39.13  | 2.74 |
| -4 | 12 | -4 | 36.36  | 2.58 |
| -4 | 12 | -4 | 37.60  | 2.38 |
| -4 | 12 | -3 | 45.03  | 3.04 |
| -4 | 12 | -3 | 43.07  | 2.70 |
| -4 | 12 | -3 | 40.90  | 2.35 |
| -4 | 12 | -3 | 43.02  | 3.01 |
| -4 | 12 | -3 | 42.51  | 2.74 |
| -4 | 12 | -3 | 40.20  | 2.60 |
| -4 | 12 | -2 | 5.50   | 1.19 |
| -4 | 12 | -2 | 6.58   | 1.33 |
| -4 | 12 | -2 | 6.97   | 1.34 |
| -4 | 12 | -2 | 4.95   | 1.11 |
| -4 | 12 | -2 | 8.70   | 1.64 |
| -4 | 12 | -1 | 6.78   | 1.43 |

## CIF 31

|    |    |    |        |      |
|----|----|----|--------|------|
| -4 | 12 | -1 | 5.74   | 1.64 |
| -4 | 12 | -1 | 4.41   | 1.07 |
| -4 | 12 | -1 | 6.48   | 1.43 |
| -4 | 12 | -1 | 3.71   | 1.18 |
| -4 | 12 | -1 | 3.51   | 0.82 |
| -4 | 12 | 0  | 61.67  | 3.20 |
| -4 | 12 | 0  | 53.81  | 2.88 |
| -4 | 12 | 0  | 60.09  | 3.37 |
| -4 | 12 | 0  | 58.52  | 2.92 |
| -4 | 12 | 0  | 57.19  | 3.08 |
| -4 | 12 | 0  | 65.17  | 2.81 |
| -4 | 12 | 1  | 459.46 | 8.86 |
| -4 | 12 | 1  | 416.60 | 8.15 |
| -4 | 12 | 1  | 453.60 | 8.68 |
| -4 | 12 | 1  | 391.32 | 7.30 |
| -4 | 12 | 1  | 482.63 | 8.14 |
| -4 | 12 | 2  | 9.40   | 1.48 |
| -4 | 12 | 2  | 9.20   | 1.20 |
| -4 | 12 | 2  | 8.31   | 1.29 |
| -4 | 12 | 3  | 1.67   | 0.95 |
| -4 | 12 | 3  | 2.04   | 0.67 |
| -4 | 12 | 3  | 3.31   | 0.93 |
| -4 | 12 | 4  | 19.14  | 1.38 |
| -4 | 12 | 4  | 21.43  | 1.41 |
| -4 | 13 | -6 | 251.24 | 5.04 |
| -4 | 13 | -6 | 264.70 | 3.83 |
| -4 | 13 | -5 | 25.68  | 1.62 |
| -4 | 13 | -5 | 36.78  | 2.10 |
| -4 | 13 | -5 | 32.15  | 1.67 |
| -4 | 13 | -5 | 24.14  | 1.53 |
| -4 | 13 | -5 | 33.97  | 1.94 |
| -4 | 13 | -5 | 39.03  | 1.41 |
| -4 | 13 | -4 | 0.48   | 0.89 |
| -4 | 13 | -4 | 0.02   | 0.53 |
| -4 | 13 | -4 | 0.66   | 0.77 |
| -4 | 13 | -4 | 0.51   | 0.47 |
| -4 | 13 | -3 | 68.81  | 2.87 |
| -4 | 13 | -3 | 74.43  | 2.92 |
| -4 | 13 | -3 | 76.20  | 3.17 |
| -4 | 13 | -2 | 45.28  | 1.87 |
| -4 | 13 | -2 | 49.57  | 2.33 |

## CIF 31

|    |     |    |        |      |
|----|-----|----|--------|------|
| -4 | 13  | -2 | 52.36  | 2.51 |
| -4 | 13  | -2 | 41.22  | 2.44 |
| -4 | 13  | -1 | 1.69   | 0.71 |
| -4 | 13  | -1 | 1.86   | 0.95 |
| -4 | 13  | -1 | 1.81   | 0.70 |
| -4 | 13  | 0  | 120.46 | 3.27 |
| -4 | 13  | 0  | 128.96 | 3.49 |
| -4 | 13  | 0  | 119.02 | 3.37 |
| -4 | 13  | 1  | 22.62  | 1.38 |
| -3 | -11 | 4  | 62.61  | 1.56 |
| -3 | -11 | 4  | 66.09  | 1.75 |
| -3 | -11 | 5  | 6.64   | 0.53 |
| -3 | -11 | 6  | 68.18  | 1.76 |
| -3 | -11 | 7  | 8.89   | 0.64 |
| -3 | -10 | -1 | 135.65 | 2.62 |
| -3 | -10 | 0  | 3.73   | 0.57 |
| -3 | -10 | 1  | 44.03  | 1.88 |
| -3 | -10 | 1  | 52.14  | 1.86 |
| -3 | -10 | 2  | 68.00  | 2.38 |
| -3 | -10 | 2  | 72.18  | 2.20 |
| -3 | -10 | 2  | 70.00  | 2.33 |
| -3 | -10 | 3  | 8.04   | 1.02 |
| -3 | -10 | 3  | 7.54   | 0.92 |
| -3 | -10 | 4  | 6.12   | 0.96 |
| -3 | -10 | 4  | 8.65   | 1.27 |
| -3 | -10 | 4  | 5.46   | 0.89 |
| -3 | -10 | 5  | 5.46   | 0.91 |
| -3 | -10 | 5  | 7.80   | 1.22 |
| -3 | -10 | 6  | 158.07 | 4.47 |
| -3 | -10 | 6  | 178.55 | 3.68 |
| -3 | -10 | 6  | 152.87 | 4.23 |
| -3 | -10 | 6  | 193.04 | 4.08 |
| -3 | -10 | 6  | 166.26 | 4.25 |
| -3 | -10 | 7  | 25.78  | 1.24 |
| -3 | -10 | 7  | 24.75  | 1.81 |
| -3 | -10 | 7  | 26.49  | 1.74 |
| -3 | -10 | 7  | 30.41  | 1.54 |
| -3 | -10 | 7  | 26.85  | 1.71 |
| -3 | -10 | 8  | 112.57 | 2.72 |
| -3 | -10 | 8  | 114.82 | 3.26 |
| -3 | -10 | 8  | 115.90 | 3.48 |

## CIF 31

|    |     |    |        |      |
|----|-----|----|--------|------|
| -3 | -10 | 8  | 115.01 | 3.28 |
| -3 | -10 | 9  | 13.02  | 1.06 |
| -3 | -10 | 9  | 13.64  | 1.24 |
| -3 | -10 | 10 | 88.19  | 2.45 |
| -3 | -10 | 10 | 85.01  | 2.49 |
| -3 | -9  | -3 | 26.61  | 1.25 |
| -3 | -9  | -2 | 34.30  | 1.66 |
| -3 | -9  | -2 | 30.33  | 1.30 |
| -3 | -9  | -1 | 194.54 | 4.33 |
| -3 | -9  | -1 | 189.81 | 3.90 |
| -3 | -9  | 0  | 61.93  | 2.14 |
| -3 | -9  | 0  | 67.65  | 2.48 |
| -3 | -9  | 1  | 14.29  | 1.47 |
| -3 | -9  | 1  | 13.78  | 1.21 |
| -3 | -9  | 2  | 85.71  | 3.20 |
| -3 | -9  | 2  | 70.97  | 3.46 |
| -3 | -9  | 2  | 87.58  | 3.02 |
| -3 | -9  | 2  | 72.64  | 2.99 |
| -3 | -9  | 3  | 118.62 | 4.51 |
| -3 | -9  | 3  | 122.40 | 4.54 |
| -3 | -9  | 3  | 117.23 | 3.92 |
| -3 | -9  | 4  | 75.33  | 3.30 |
| -3 | -9  | 4  | 68.01  | 3.49 |
| -3 | -9  | 4  | 78.72  | 3.72 |
| -3 | -9  | 4  | 87.84  | 3.14 |
| -3 | -9  | 4  | 64.35  | 2.94 |
| -3 | -9  | 4  | 72.00  | 3.56 |
| -3 | -9  | 5  | 45.49  | 2.77 |
| -3 | -9  | 5  | 46.20  | 2.92 |
| -3 | -9  | 5  | 44.05  | 2.76 |
| -3 | -9  | 5  | 43.17  | 2.50 |
| -3 | -9  | 5  | 42.14  | 2.45 |
| -3 | -9  | 6  | 37.60  | 2.30 |
| -3 | -9  | 6  | 40.54  | 2.68 |
| -3 | -9  | 6  | 38.40  | 2.59 |
| -3 | -9  | 6  | 40.20  | 2.15 |
| -3 | -9  | 6  | 40.41  | 2.44 |
| -3 | -9  | 6  | 38.22  | 2.63 |
| -3 | -9  | 7  | 53.38  | 2.91 |
| -3 | -9  | 7  | 48.12  | 2.75 |
| -3 | -9  | 7  | 56.41  | 2.47 |

## CIF 31

|    |    |    |         |       |
|----|----|----|---------|-------|
| -3 | -9 | 7  | 48.60   | 2.54  |
| -3 | -9 | 7  | 50.17   | 2.64  |
| -3 | -9 | 7  | 54.22   | 3.03  |
| -3 | -9 | 7  | 51.76   | 2.41  |
| -3 | -9 | 8  | 47.05   | 2.61  |
| -3 | -9 | 8  | 54.62   | 2.86  |
| -3 | -9 | 8  | 48.34   | 2.63  |
| -3 | -9 | 8  | 51.76   | 2.17  |
| -3 | -9 | 8  | 49.94   | 2.81  |
| -3 | -9 | 8  | 45.84   | 2.42  |
| -3 | -9 | 8  | 51.16   | 2.43  |
| -3 | -9 | 9  | 3.88    | 0.74  |
| -3 | -9 | 9  | 1.77    | 1.07  |
| -3 | -9 | 9  | 2.24    | 0.80  |
| -3 | -9 | 9  | 1.76    | 0.87  |
| -3 | -9 | 9  | 2.33    | 0.96  |
| -3 | -9 | 10 | 148.55  | 3.85  |
| -3 | -9 | 10 | 172.23  | 4.57  |
| -3 | -9 | 10 | 171.99  | 4.34  |
| -3 | -9 | 10 | 143.23  | 3.89  |
| -3 | -9 | 11 | 99.28   | 3.15  |
| -3 | -9 | 11 | 91.64   | 2.94  |
| -3 | -9 | 12 | 14.88   | 1.16  |
| -3 | -9 | 12 | 17.88   | 1.16  |
| -3 | -8 | -5 | 86.57   | 2.06  |
| -3 | -8 | -5 | 94.37   | 2.15  |
| -3 | -8 | -4 | 1.81    | 0.68  |
| -3 | -8 | -4 | 1.41    | 0.59  |
| -3 | -8 | -3 | 53.85   | 2.33  |
| -3 | -8 | -3 | 48.28   | 1.99  |
| -3 | -8 | -3 | 47.86   | 1.87  |
| -3 | -8 | -2 | 11.53   | 1.37  |
| -3 | -8 | -2 | 9.41    | 1.05  |
| -3 | -8 | -2 | 12.37   | 1.25  |
| -3 | -8 | -1 | 30.94   | 2.16  |
| -3 | -8 | -1 | 29.00   | 1.64  |
| -3 | -8 | -1 | 29.48   | 1.61  |
| -3 | -8 | -1 | 31.65   | 1.95  |
| -3 | -8 | 0  | 174.23  | 4.31  |
| -3 | -8 | 0  | 147.42  | 3.60  |
| -3 | -8 | 1  | 1869.00 | 24.29 |

## CIF 31

|    |    |   |         |       |
|----|----|---|---------|-------|
| -3 | -8 | 1 | 1853.27 | 21.96 |
| -3 | -8 | 1 | 1846.78 | 22.40 |
| -3 | -8 | 2 | 445.88  | 8.84  |
| -3 | -8 | 2 | 433.38  | 9.67  |
| -3 | -8 | 2 | 408.72  | 9.56  |
| -3 | -8 | 2 | 432.53  | 8.64  |
| -3 | -8 | 2 | 430.02  | 8.48  |
| -3 | -8 | 3 | 6.76    | 1.65  |
| -3 | -8 | 3 | 7.18    | 1.25  |
| -3 | -8 | 3 | 8.20    | 1.65  |
| -3 | -8 | 3 | 6.74    | 1.22  |
| -3 | -8 | 3 | 6.03    | 1.33  |
| -3 | -8 | 3 | 6.73    | 1.23  |
| -3 | -8 | 4 | 15.63   | 1.67  |
| -3 | -8 | 4 | 10.75   | 1.80  |
| -3 | -8 | 4 | 11.96   | 1.83  |
| -3 | -8 | 4 | 13.23   | 1.69  |
| -3 | -8 | 4 | 11.47   | 1.48  |
| -3 | -8 | 5 | 0.71    | 0.88  |
| -3 | -8 | 5 | 0.81    | 1.03  |
| -3 | -8 | 5 | 1.82    | 1.34  |
| -3 | -8 | 5 | 0.81    | 1.22  |
| -3 | -8 | 5 | 0.14    | 0.99  |
| -3 | -8 | 5 | 0.72    | 0.83  |
| -3 | -8 | 5 | 1.41    | 0.78  |
| -3 | -8 | 6 | 111.44  | 3.59  |
| -3 | -8 | 6 | 121.17  | 4.07  |
| -3 | -8 | 6 | 109.90  | 4.13  |
| -3 | -8 | 6 | 114.54  | 4.61  |
| -3 | -8 | 6 | 118.20  | 4.37  |
| -3 | -8 | 6 | 117.02  | 4.77  |
| -3 | -8 | 7 | 4.24    | 1.12  |
| -3 | -8 | 7 | 7.15    | 1.57  |
| -3 | -8 | 7 | 5.05    | 0.97  |
| -3 | -8 | 7 | 4.81    | 1.38  |
| -3 | -8 | 7 | 3.61    | 1.40  |
| -3 | -8 | 7 | 5.22    | 1.01  |
| -3 | -8 | 7 | 4.85    | 1.17  |
| -3 | -8 | 7 | 4.31    | 1.25  |
| -3 | -8 | 7 | 5.19    | 1.13  |
| -3 | -8 | 7 | 4.69    | 0.88  |



## CIF 31

|    |    |    |        |      |
|----|----|----|--------|------|
| -3 | -8 | 8  | 111.03 | 3.64 |
| -3 | -8 | 8  | 108.71 | 4.00 |
| -3 | -8 | 8  | 115.67 | 4.41 |
| -3 | -8 | 8  | 113.12 | 3.58 |
| -3 | -8 | 8  | 124.65 | 4.76 |
| -3 | -8 | 8  | 112.38 | 4.20 |
| -3 | -8 | 8  | 116.25 | 4.19 |
| -3 | -8 | 8  | 105.22 | 3.30 |
| -3 | -8 | 8  | 114.72 | 4.11 |
| -3 | -8 | 8  | 112.81 | 4.22 |
| -3 | -8 | 9  | 24.94  | 1.79 |
| -3 | -8 | 9  | 24.18  | 1.62 |
| -3 | -8 | 9  | 24.65  | 1.56 |
| -3 | -8 | 9  | 25.98  | 2.10 |
| -3 | -8 | 9  | 32.58  | 2.47 |
| -3 | -8 | 9  | 22.11  | 1.90 |
| -3 | -8 | 9  | 27.01  | 2.12 |
| -3 | -8 | 9  | 26.33  | 2.04 |
| -3 | -8 | 9  | 26.29  | 1.95 |
| -3 | -8 | 9  | 23.39  | 1.90 |
| -3 | -8 | 10 | 40.17  | 2.38 |
| -3 | -8 | 10 | 36.27  | 1.86 |
| -3 | -8 | 10 | 36.11  | 2.03 |
| -3 | -8 | 10 | 37.41  | 2.31 |
| -3 | -8 | 10 | 39.11  | 2.37 |
| -3 | -8 | 10 | 42.89  | 2.42 |
| -3 | -8 | 11 | 232.06 | 5.13 |
| -3 | -8 | 11 | 230.02 | 4.50 |
| -3 | -8 | 11 | 245.09 | 5.00 |
| -3 | -8 | 11 | 248.36 | 5.59 |
| -3 | -8 | 11 | 248.44 | 5.64 |
| -3 | -8 | 12 | 12.15  | 1.21 |
| -3 | -8 | 12 | 14.37  | 1.37 |
| -3 | -8 | 12 | 12.53  | 1.11 |
| -3 | -8 | 13 | 682.63 | 8.52 |
| -3 | -8 | 13 | 607.43 | 7.95 |
| -3 | -7 | -7 | 0.38   | 0.40 |
| -3 | -7 | -7 | 0.08   | 0.24 |
| -3 | -7 | -6 | 105.48 | 2.56 |
| -3 | -7 | -6 | 101.48 | 2.40 |
| -3 | -7 | -6 | 109.91 | 2.80 |

## CIF 31

|    |    |    |         |       |
|----|----|----|---------|-------|
| -3 | -7 | -5 | 166.78  | 3.95  |
| -3 | -7 | -5 | 158.66  | 3.54  |
| -3 | -7 | -4 | 88.60   | 3.14  |
| -3 | -7 | -4 | 83.13   | 2.70  |
| -3 | -7 | -4 | 87.54   | 3.07  |
| -3 | -7 | -4 | 79.97   | 2.60  |
| -3 | -7 | -3 | 372.17  | 7.27  |
| -3 | -7 | -3 | 357.93  | 6.80  |
| -3 | -7 | -3 | 372.00  | 6.63  |
| -3 | -7 | -2 | 35.60   | 2.34  |
| -3 | -7 | -2 | 41.50   | 2.47  |
| -3 | -7 | -2 | 39.88   | 1.98  |
| -3 | -7 | -2 | 38.47   | 2.19  |
| -3 | -7 | -2 | 39.00   | 2.19  |
| -3 | -7 | -1 | 2.48    | 0.80  |
| -3 | -7 | -1 | 3.33    | 1.17  |
| -3 | -7 | -1 | 2.69    | 0.93  |
| -3 | -7 | -1 | 2.51    | 0.75  |
| -3 | -7 | -1 | 3.53    | 1.04  |
| -3 | -7 | 0  | 11.86   | 1.27  |
| -3 | -7 | 0  | 8.12    | 1.40  |
| -3 | -7 | 0  | 8.05    | 1.30  |
| -3 | -7 | 0  | 8.51    | 1.15  |
| -3 | -7 | 1  | 71.84   | 3.04  |
| -3 | -7 | 1  | 74.70   | 3.96  |
| -3 | -7 | 1  | 66.64   | 3.85  |
| -3 | -7 | 1  | 70.61   | 3.24  |
| -3 | -7 | 1  | 75.73   | 3.50  |
| -3 | -7 | 1  | 73.95   | 3.96  |
| -3 | -7 | 2  | 14.34   | 1.67  |
| -3 | -7 | 2  | 12.13   | 1.40  |
| -3 | -7 | 2  | 16.57   | 2.14  |
| -3 | -7 | 2  | 18.26   | 2.20  |
| -3 | -7 | 2  | 14.85   | 1.77  |
| -3 | -7 | 2  | 16.73   | 1.73  |
| -3 | -7 | 3  | 1099.29 | 16.37 |
| -3 | -7 | 3  | 1033.05 | 13.83 |
| -3 | -7 | 3  | 1067.20 | 14.81 |
| -3 | -7 | 3  | 935.19  | 13.99 |
| -3 | -7 | 3  | 949.73  | 13.94 |
| -3 | -7 | 3  | 1177.28 | 16.62 |

## CIF 31

|    |    |   |        |       |
|----|----|---|--------|-------|
| -3 | -7 | 3 | 980.18 | 12.93 |
| -3 | -7 | 4 | 42.29  | 3.01  |
| -3 | -7 | 4 | 42.40  | 2.98  |
| -3 | -7 | 4 | 44.17  | 2.69  |
| -3 | -7 | 4 | 43.27  | 2.53  |
| -3 | -7 | 4 | 43.33  | 2.57  |
| -3 | -7 | 4 | 46.79  | 2.46  |
| -3 | -7 | 4 | 53.34  | 2.99  |
| -3 | -7 | 5 | 6.11   | 1.34  |
| -3 | -7 | 5 | 3.69   | 1.15  |
| -3 | -7 | 5 | 5.97   | 1.45  |
| -3 | -7 | 5 | 7.25   | 1.40  |
| -3 | -7 | 5 | 3.66   | 1.32  |
| -3 | -7 | 5 | 6.12   | 1.32  |
| -3 | -7 | 5 | 7.44   | 1.25  |
| -3 | -7 | 5 | 3.65   | 0.95  |
| -3 | -7 | 5 | 8.96   | 1.40  |
| -3 | -7 | 5 | 5.52   | 1.13  |
| -3 | -7 | 6 | 4.28   | 1.02  |
| -3 | -7 | 6 | 8.24   | 1.26  |
| -3 | -7 | 6 | 4.06   | 1.27  |
| -3 | -7 | 6 | 6.07   | 1.03  |
| -3 | -7 | 6 | 5.78   | 1.47  |
| -3 | -7 | 6 | 4.72   | 1.21  |
| -3 | -7 | 6 | 5.53   | 1.30  |
| -3 | -7 | 6 | 7.36   | 1.26  |
| -3 | -7 | 6 | 4.41   | 1.20  |
| -3 | -7 | 7 | 716.79 | 12.09 |
| -3 | -7 | 7 | 760.37 | 10.85 |
| -3 | -7 | 7 | 772.24 | 11.28 |
| -3 | -7 | 7 | 772.88 | 12.90 |
| -3 | -7 | 7 | 784.39 | 11.15 |
| -3 | -7 | 7 | 754.34 | 12.11 |
| -3 | -7 | 7 | 794.29 | 12.89 |
| -3 | -7 | 7 | 726.33 | 12.32 |
| -3 | -7 | 7 | 817.75 | 12.41 |
| -3 | -7 | 7 | 800.29 | 12.42 |
| -3 | -7 | 7 | 813.93 | 12.88 |
| -3 | -7 | 8 | 29.97  | 1.96  |
| -3 | -7 | 8 | 31.77  | 1.93  |
| -3 | -7 | 8 | 31.15  | 2.39  |

## CIF 31

|    |    |    |        |      |
|----|----|----|--------|------|
| -3 | -7 | 8  | 28.54  | 2.39 |
| -3 | -7 | 8  | 29.78  | 2.36 |
| -3 | -7 | 8  | 33.23  | 2.01 |
| -3 | -7 | 8  | 28.05  | 2.04 |
| -3 | -7 | 8  | 26.84  | 2.15 |
| -3 | -7 | 8  | 28.57  | 2.38 |
| -3 | -7 | 8  | 29.87  | 2.29 |
| -3 | -7 | 8  | 33.43  | 2.43 |
| -3 | -7 | 8  | 30.16  | 2.31 |
| -3 | -7 | 9  | 1.45   | 1.09 |
| -3 | -7 | 9  | 2.68   | 0.97 |
| -3 | -7 | 9  | 2.18   | 0.74 |
| -3 | -7 | 9  | 2.61   | 1.24 |
| -3 | -7 | 9  | 2.35   | 0.85 |
| -3 | -7 | 9  | 2.83   | 0.88 |
| -3 | -7 | 9  | 1.76   | 1.01 |
| -3 | -7 | 9  | 1.73   | 1.10 |
| -3 | -7 | 9  | 1.85   | 1.15 |
| -3 | -7 | 9  | 2.09   | 0.93 |
| -3 | -7 | 9  | 3.26   | 1.18 |
| -3 | -7 | 10 | 357.23 | 7.89 |
| -3 | -7 | 10 | 334.33 | 6.84 |
| -3 | -7 | 10 | 355.46 | 7.77 |
| -3 | -7 | 10 | 311.57 | 6.31 |
| -3 | -7 | 10 | 345.77 | 7.59 |
| -3 | -7 | 10 | 325.06 | 7.24 |
| -3 | -7 | 10 | 346.91 | 7.53 |
| -3 | -7 | 10 | 322.34 | 7.20 |
| -3 | -7 | 10 | 333.14 | 7.47 |
| -3 | -7 | 10 | 328.19 | 7.03 |
| -3 | -7 | 11 | 6.95   | 1.24 |
| -3 | -7 | 11 | 5.83   | 1.01 |
| -3 | -7 | 11 | 6.98   | 1.11 |
| -3 | -7 | 11 | 6.64   | 1.40 |
| -3 | -7 | 11 | 4.58   | 1.15 |
| -3 | -7 | 11 | 3.14   | 1.04 |
| -3 | -7 | 11 | 6.59   | 1.33 |
| -3 | -7 | 11 | 6.95   | 1.28 |
| -3 | -7 | 11 | 4.66   | 0.98 |
| -3 | -7 | 12 | 33.16  | 2.09 |
| -3 | -7 | 12 | 35.13  | 2.24 |

## CIF 31

|    |    |    |        |       |
|----|----|----|--------|-------|
| -3 | -7 | 12 | 36.14  | 2.02  |
| -3 | -7 | 12 | 31.76  | 1.94  |
| -3 | -7 | 12 | 30.21  | 1.72  |
| -3 | -7 | 12 | 32.45  | 2.15  |
| -3 | -7 | 12 | 31.64  | 2.00  |
| -3 | -7 | 12 | 34.16  | 2.12  |
| -3 | -7 | 13 | 11.45  | 1.20  |
| -3 | -7 | 13 | 11.68  | 1.00  |
| -3 | -7 | 13 | 12.04  | 1.29  |
| -3 | -7 | 13 | 14.13  | 1.38  |
| -3 | -7 | 13 | 13.03  | 1.16  |
| -3 | -7 | 14 | 5.06   | 0.84  |
| -3 | -7 | 14 | 2.75   | 0.63  |
| -3 | -7 | 14 | 4.18   | 0.79  |
| -3 | -6 | -8 | 462.51 | 5.84  |
| -3 | -6 | -8 | 471.68 | 6.08  |
| -3 | -6 | -7 | 6.61   | 0.83  |
| -3 | -6 | -7 | 3.43   | 0.72  |
| -3 | -6 | -7 | 6.49   | 0.89  |
| -3 | -6 | -7 | 2.66   | 0.91  |
| -3 | -6 | -6 | 52.23  | 2.28  |
| -3 | -6 | -6 | 47.74  | 2.53  |
| -3 | -6 | -6 | 52.75  | 2.24  |
| -3 | -6 | -5 | 8.46   | 1.03  |
| -3 | -6 | -5 | 8.25   | 1.24  |
| -3 | -6 | -5 | 6.11   | 1.28  |
| -3 | -6 | -5 | 7.98   | 1.15  |
| -3 | -6 | -4 | 107.73 | 3.82  |
| -3 | -6 | -4 | 101.74 | 3.68  |
| -3 | -6 | -4 | 100.49 | 3.46  |
| -3 | -6 | -4 | 115.05 | 4.13  |
| -3 | -6 | -4 | 94.22  | 3.57  |
| -3 | -6 | -4 | 105.18 | 3.40  |
| -3 | -6 | -3 | 1.78   | 1.06  |
| -3 | -6 | -3 | 1.01   | 0.83  |
| -3 | -6 | -3 | 2.57   | 0.94  |
| -3 | -6 | -3 | 2.04   | 1.03  |
| -3 | -6 | -3 | 1.12   | 0.87  |
| -3 | -6 | -2 | 661.92 | 10.77 |
| -3 | -6 | -2 | 650.23 | 9.73  |
| -3 | -6 | -2 | 651.05 | 9.16  |

## CIF 31

|    |    |    |        |       |
|----|----|----|--------|-------|
| -3 | -6 | -2 | 668.29 | 10.26 |
| -3 | -6 | -1 | 131.22 | 3.75  |
| -3 | -6 | -1 | 131.63 | 4.06  |
| -3 | -6 | -1 | 138.68 | 3.88  |
| -3 | -6 | 0  | 752.83 | 11.52 |
| -3 | -6 | 0  | 675.08 | 9.43  |
| -3 | -6 | 0  | 708.05 | 12.42 |
| -3 | -6 | 0  | 756.88 | 10.42 |
| -3 | -6 | 0  | 702.66 | 9.99  |
| -3 | -6 | 1  | 4.96   | 0.88  |
| -3 | -6 | 1  | 4.35   | 1.41  |
| -3 | -6 | 1  | 3.71   | 0.95  |
| -3 | -6 | 1  | 3.80   | 1.06  |
| -3 | -6 | 2  | 395.76 | 6.89  |
| -3 | -6 | 2  | 412.11 | 7.36  |
| -3 | -6 | 2  | 419.40 | 8.00  |
| -3 | -6 | 2  | 414.01 | 8.07  |
| -3 | -6 | 2  | 398.83 | 7.63  |
| -3 | -6 | 3  | 11.87  | 1.74  |
| -3 | -6 | 3  | 11.31  | 1.66  |
| -3 | -6 | 3  | 9.97   | 1.63  |
| -3 | -6 | 3  | 9.67   | 1.24  |
| -3 | -6 | 3  | 11.90  | 1.39  |
| -3 | -6 | 3  | 14.97  | 1.87  |
| -3 | -6 | 3  | 8.44   | 1.27  |
| -3 | -6 | 3  | 11.03  | 1.71  |
| -3 | -6 | 3  | 12.03  | 1.45  |
| -3 | -6 | 3  | 9.48   | 1.19  |
| -3 | -6 | 3  | 10.28  | 1.53  |
| -3 | -6 | 3  | 10.50  | 1.45  |
| -3 | -6 | 4  | 9.14   | 1.62  |
| -3 | -6 | 4  | 9.09   | 1.45  |
| -3 | -6 | 4  | 7.48   | 1.49  |
| -3 | -6 | 4  | 6.79   | 1.26  |
| -3 | -6 | 4  | 4.91   | 1.11  |
| -3 | -6 | 4  | 7.11   | 1.28  |
| -3 | -6 | 4  | 5.10   | 1.06  |
| -3 | -6 | 4  | 4.94   | 1.29  |
| -3 | -6 | 4  | 6.28   | 1.33  |
| -3 | -6 | 5  | 1.40   | 0.88  |
| -3 | -6 | 5  | 0.09   | 0.94  |

## CIF 31

|    |    |   |        |      |
|----|----|---|--------|------|
| -3 | -6 | 5 | -0.39  | 1.13 |
| -3 | -6 | 5 | 0.83   | 1.06 |
| -3 | -6 | 5 | 0.59   | 0.69 |
| -3 | -6 | 5 | 0.27   | 0.79 |
| -3 | -6 | 5 | 0.40   | 0.92 |
| -3 | -6 | 5 | 1.42   | 1.02 |
| -3 | -6 | 5 | 0.09   | 0.94 |
| -3 | -6 | 5 | 1.26   | 0.86 |
| -3 | -6 | 6 | 19.80  | 2.03 |
| -3 | -6 | 6 | 17.11  | 1.75 |
| -3 | -6 | 6 | 19.97  | 1.62 |
| -3 | -6 | 6 | 20.68  | 1.89 |
| -3 | -6 | 6 | 17.19  | 1.39 |
| -3 | -6 | 6 | 19.58  | 1.85 |
| -3 | -6 | 6 | 17.46  | 1.46 |
| -3 | -6 | 6 | 20.47  | 2.06 |
| -3 | -6 | 6 | 20.13  | 1.80 |
| -3 | -6 | 6 | 22.44  | 2.04 |
| -3 | -6 | 6 | 19.19  | 1.91 |
| -3 | -6 | 6 | 17.81  | 1.85 |
| -3 | -6 | 6 | 17.48  | 1.51 |
| -3 | -6 | 7 | 112.88 | 4.18 |
| -3 | -6 | 7 | 92.20  | 3.92 |
| -3 | -6 | 7 | 111.14 | 3.58 |
| -3 | -6 | 7 | 101.20 | 4.23 |
| -3 | -6 | 7 | 108.43 | 3.35 |
| -3 | -6 | 7 | 103.64 | 4.00 |
| -3 | -6 | 7 | 98.48  | 3.79 |
| -3 | -6 | 7 | 107.36 | 3.48 |
| -3 | -6 | 7 | 113.02 | 4.33 |
| -3 | -6 | 7 | 101.51 | 4.05 |
| -3 | -6 | 7 | 94.58  | 3.89 |
| -3 | -6 | 8 | 34.70  | 1.94 |
| -3 | -6 | 8 | 35.57  | 2.56 |
| -3 | -6 | 8 | 34.74  | 2.37 |
| -3 | -6 | 8 | 39.38  | 2.27 |
| -3 | -6 | 8 | 30.55  | 2.49 |
| -3 | -6 | 8 | 33.68  | 2.39 |
| -3 | -6 | 8 | 34.66  | 2.50 |
| -3 | -6 | 8 | 38.90  | 2.18 |
| -3 | -6 | 8 | 37.20  | 2.54 |

## CIF 31

|    |    |    |        |      |
|----|----|----|--------|------|
| -3 | -6 | 8  | 36.88  | 2.64 |
| -3 | -6 | 8  | 33.38  | 2.40 |
| -3 | -6 | 8  | 36.70  | 2.56 |
| -3 | -6 | 8  | 36.45  | 2.40 |
| -3 | -6 | 9  | 293.66 | 6.53 |
| -3 | -6 | 9  | 245.59 | 5.11 |
| -3 | -6 | 9  | 274.27 | 7.08 |
| -3 | -6 | 9  | 287.64 | 6.34 |
| -3 | -6 | 9  | 274.10 | 6.74 |
| -3 | -6 | 9  | 278.66 | 7.23 |
| -3 | -6 | 9  | 267.20 | 6.80 |
| -3 | -6 | 9  | 284.53 | 6.99 |
| -3 | -6 | 9  | 282.55 | 6.99 |
| -3 | -6 | 9  | 256.19 | 6.63 |
| -3 | -6 | 9  | 257.37 | 6.40 |
| -3 | -6 | 10 | 190.89 | 5.65 |
| -3 | -6 | 10 | 196.20 | 5.93 |
| -3 | -6 | 10 | 207.73 | 5.98 |
| -3 | -6 | 10 | 210.53 | 5.51 |
| -3 | -6 | 10 | 190.07 | 5.66 |
| -3 | -6 | 10 | 191.74 | 5.73 |
| -3 | -6 | 10 | 182.64 | 5.50 |
| -3 | -6 | 10 | 199.81 | 5.75 |
| -3 | -6 | 10 | 202.25 | 5.87 |
| -3 | -6 | 10 | 192.23 | 5.22 |
| -3 | -6 | 10 | 210.02 | 5.63 |
| -3 | -6 | 11 | 244.05 | 5.97 |
| -3 | -6 | 11 | 221.28 | 6.05 |
| -3 | -6 | 11 | 234.84 | 6.47 |
| -3 | -6 | 11 | 237.84 | 6.18 |
| -3 | -6 | 11 | 244.87 | 6.29 |
| -3 | -6 | 11 | 220.45 | 5.95 |
| -3 | -6 | 11 | 241.04 | 6.10 |
| -3 | -6 | 11 | 238.33 | 6.14 |
| -3 | -6 | 11 | 217.93 | 5.84 |
| -3 | -6 | 11 | 243.73 | 6.38 |
| -3 | -6 | 12 | 198.80 | 5.36 |
| -3 | -6 | 12 | 206.96 | 5.69 |
| -3 | -6 | 12 | 207.46 | 5.38 |
| -3 | -6 | 12 | 184.60 | 5.31 |
| -3 | -6 | 12 | 208.58 | 5.46 |



## CIF 31

|    |    |    |        |      |
|----|----|----|--------|------|
| -3 | -6 | 12 | 205.41 | 5.29 |
| -3 | -6 | 12 | 217.17 | 5.51 |
| -3 | -6 | 12 | 175.68 | 5.20 |
| -3 | -6 | 12 | 169.99 | 4.89 |
| -3 | -6 | 12 | 198.85 | 5.34 |
| -3 | -6 | 13 | 8.25   | 1.16 |
| -3 | -6 | 13 | 6.57   | 1.05 |
| -3 | -6 | 13 | 7.78   | 1.32 |
| -3 | -6 | 13 | 7.39   | 1.21 |
| -3 | -6 | 13 | 6.96   | 1.28 |
| -3 | -6 | 13 | 7.43   | 1.23 |
| -3 | -6 | 13 | 7.58   | 1.17 |
| -3 | -6 | 14 | 301.96 | 5.73 |
| -3 | -6 | 14 | 254.10 | 5.25 |
| -3 | -6 | 14 | 282.77 | 5.62 |
| -3 | -6 | 14 | 284.36 | 5.52 |
| -3 | -6 | 14 | 239.02 | 4.64 |
| -3 | -6 | 15 | 1.55   | 0.56 |
| -3 | -6 | 15 | 1.92   | 0.60 |
| -3 | -5 | -9 | 0.40   | 0.51 |
| -3 | -5 | -9 | 5.09   | 0.92 |
| -3 | -5 | -8 | 374.04 | 5.57 |
| -3 | -5 | -8 | 400.29 | 6.40 |
| -3 | -5 | -8 | 343.79 | 5.93 |
| -3 | -5 | -8 | 375.97 | 7.15 |
| -3 | -5 | -8 | 353.91 | 6.04 |
| -3 | -5 | -7 | 228.81 | 4.91 |
| -3 | -5 | -7 | 226.16 | 5.11 |
| -3 | -5 | -7 | 237.15 | 5.35 |
| -3 | -5 | -7 | 239.21 | 6.13 |
| -3 | -5 | -6 | 1.12   | 0.94 |
| -3 | -5 | -6 | 1.11   | 1.12 |
| -3 | -5 | -6 | 1.71   | 0.98 |
| -3 | -5 | -5 | 486.27 | 8.61 |
| -3 | -5 | -5 | 452.96 | 9.37 |
| -3 | -5 | -5 | 483.32 | 8.38 |
| -3 | -5 | -5 | 441.41 | 7.55 |
| -3 | -5 | -4 | 459.10 | 8.46 |
| -3 | -5 | -4 | 439.25 | 8.53 |
| -3 | -5 | -4 | 471.13 | 8.23 |
| -3 | -5 | -4 | 450.13 | 7.84 |

## CIF 31

|    |    |    |         |       |
|----|----|----|---------|-------|
| -3 | -5 | -4 | 430.80  | 8.29  |
| -3 | -5 | -4 | 436.69  | 9.06  |
| -3 | -5 | -3 | 25.59   | 2.05  |
| -3 | -5 | -3 | 25.67   | 1.94  |
| -3 | -5 | -3 | 24.55   | 1.85  |
| -3 | -5 | -3 | 25.61   | 1.84  |
| -3 | -5 | -3 | 24.23   | 1.90  |
| -3 | -5 | -3 | 27.55   | 2.24  |
| -3 | -5 | -2 | 222.46  | 5.32  |
| -3 | -5 | -2 | 226.59  | 5.64  |
| -3 | -5 | -2 | 220.17  | 6.55  |
| -3 | -5 | -2 | 213.36  | 5.06  |
| -3 | -5 | -2 | 230.35  | 4.74  |
| -3 | -5 | -2 | 229.78  | 5.72  |
| -3 | -5 | -2 | 212.73  | 5.59  |
| -3 | -5 | -1 | 2.66    | 0.78  |
| -3 | -5 | -1 | 2.51    | 0.72  |
| -3 | -5 | -1 | 2.09    | 0.85  |
| -3 | -5 | -1 | 2.10    | 1.18  |
| -3 | -5 | -1 | 2.39    | 1.22  |
| -3 | -5 | -1 | 2.51    | 0.84  |
| -3 | -5 | -1 | 1.96    | 0.93  |
| -3 | -5 | -1 | 2.47    | 1.18  |
| -3 | -5 | 0  | 1228.91 | 15.21 |
| -3 | -5 | 0  | 1232.91 | 17.02 |
| -3 | -5 | 0  | 1220.64 | 14.32 |
| -3 | -5 | 0  | 1213.82 | 16.60 |
| -3 | -5 | 0  | 1246.78 | 14.45 |
| -3 | -5 | 0  | 1265.99 | 15.65 |
| -3 | -5 | 0  | 1253.15 | 15.57 |
| -3 | -5 | 0  | 1290.78 | 17.10 |
| -3 | -5 | 1  | 866.00  | 13.57 |
| -3 | -5 | 1  | 902.73  | 11.27 |
| -3 | -5 | 1  | 980.41  | 12.51 |
| -3 | -5 | 1  | 888.56  | 11.03 |
| -3 | -5 | 1  | 987.05  | 14.46 |
| -3 | -5 | 1  | 871.19  | 14.05 |
| -3 | -5 | 1  | 1017.97 | 14.21 |
| -3 | -5 | 1  | 955.11  | 11.57 |
| -3 | -5 | 1  | 1002.91 | 12.18 |
| -3 | -5 | 1  | 952.14  | 12.74 |

## CIF 31

|    |    |   |        |       |
|----|----|---|--------|-------|
| -3 | -5 | 2 | 707.89 | 11.63 |
| -3 | -5 | 2 | 759.91 | 12.20 |
| -3 | -5 | 2 | 750.39 | 11.56 |
| -3 | -5 | 2 | 680.25 | 9.96  |
| -3 | -5 | 2 | 695.89 | 9.82  |
| -3 | -5 | 2 | 703.77 | 10.41 |
| -3 | -5 | 2 | 684.27 | 10.39 |
| -3 | -5 | 2 | 687.49 | 9.62  |
| -3 | -5 | 2 | 727.39 | 10.79 |
| -3 | -5 | 3 | 202.45 | 4.92  |
| -3 | -5 | 3 | 198.82 | 4.92  |
| -3 | -5 | 3 | 197.48 | 5.52  |
| -3 | -5 | 3 | 188.04 | 5.57  |
| -3 | -5 | 3 | 201.19 | 5.45  |
| -3 | -5 | 3 | 191.74 | 4.52  |
| -3 | -5 | 3 | 181.72 | 4.56  |
| -3 | -5 | 3 | 198.12 | 5.36  |
| -3 | -5 | 3 | 196.97 | 4.63  |
| -3 | -5 | 3 | 213.34 | 5.34  |
| -3 | -5 | 4 | 108.92 | 3.60  |
| -3 | -5 | 4 | 118.27 | 4.18  |
| -3 | -5 | 4 | 115.27 | 2.94  |
| -3 | -5 | 4 | 114.27 | 4.24  |
| -3 | -5 | 4 | 118.43 | 4.21  |
| -3 | -5 | 4 | 119.07 | 3.47  |
| -3 | -5 | 4 | 109.56 | 3.53  |
| -3 | -5 | 4 | 107.68 | 3.92  |
| -3 | -5 | 4 | 102.16 | 3.82  |
| -3 | -5 | 4 | 122.59 | 3.72  |
| -3 | -5 | 4 | 105.66 | 3.48  |
| -3 | -5 | 4 | 110.57 | 3.81  |
| -3 | -5 | 5 | 28.90  | 2.06  |
| -3 | -5 | 5 | 25.68  | 1.54  |
| -3 | -5 | 5 | 33.12  | 2.27  |
| -3 | -5 | 5 | 26.61  | 1.46  |
| -3 | -5 | 5 | 29.95  | 2.25  |
| -3 | -5 | 5 | 28.85  | 1.87  |
| -3 | -5 | 5 | 33.60  | 2.09  |
| -3 | -5 | 5 | 23.29  | 1.59  |
| -3 | -5 | 5 | 28.98  | 2.09  |
| -3 | -5 | 5 | 25.67  | 1.97  |

## CIF 31

|    |    |   |        |      |
|----|----|---|--------|------|
| -3 | -5 | 5 | 29.00  | 2.11 |
| -3 | -5 | 5 | 29.94  | 2.00 |
| -3 | -5 | 6 | 21.33  | 1.54 |
| -3 | -5 | 6 | 26.24  | 2.00 |
| -3 | -5 | 6 | 24.21  | 2.04 |
| -3 | -5 | 6 | 23.24  | 1.60 |
| -3 | -5 | 6 | 22.21  | 1.97 |
| -3 | -5 | 6 | 22.59  | 1.52 |
| -3 | -5 | 6 | 27.98  | 2.04 |
| -3 | -5 | 6 | 23.09  | 1.92 |
| -3 | -5 | 6 | 23.15  | 1.93 |
| -3 | -5 | 6 | 22.98  | 1.76 |
| -3 | -5 | 6 | 24.65  | 1.91 |
| -3 | -5 | 6 | 21.41  | 1.88 |
| -3 | -5 | 6 | 21.68  | 1.76 |
| -3 | -5 | 6 | 23.55  | 1.98 |
| -3 | -5 | 6 | 22.33  | 1.85 |
| -3 | -5 | 7 | 147.08 | 4.65 |
| -3 | -5 | 7 | 136.76 | 4.62 |
| -3 | -5 | 7 | 143.84 | 4.74 |
| -3 | -5 | 7 | 178.08 | 5.20 |
| -3 | -5 | 7 | 173.60 | 5.25 |
| -3 | -5 | 7 | 160.83 | 4.84 |
| -3 | -5 | 7 | 156.07 | 4.24 |
| -3 | -5 | 7 | 145.08 | 3.86 |
| -3 | -5 | 7 | 160.02 | 4.95 |
| -3 | -5 | 7 | 156.72 | 4.60 |
| -3 | -5 | 7 | 171.80 | 4.86 |
| -3 | -5 | 7 | 146.26 | 4.21 |
| -3 | -5 | 7 | 151.40 | 4.47 |
| -3 | -5 | 7 | 173.16 | 5.06 |
| -3 | -5 | 7 | 153.66 | 4.65 |
| -3 | -5 | 8 | 11.43  | 1.53 |
| -3 | -5 | 8 | 13.97  | 1.66 |
| -3 | -5 | 8 | 13.17  | 1.46 |
| -3 | -5 | 8 | 13.65  | 1.74 |
| -3 | -5 | 8 | 12.00  | 1.51 |
| -3 | -5 | 8 | 10.24  | 1.06 |
| -3 | -5 | 8 | 13.12  | 1.68 |
| -3 | -5 | 8 | 12.51  | 1.56 |
| -3 | -5 | 8 | 12.81  | 1.61 |

## CIF 31

|    |    |    |        |      |
|----|----|----|--------|------|
| -3 | -5 | 8  | 12.03  | 1.71 |
| -3 | -5 | 8  | 11.44  | 1.39 |
| -3 | -5 | 8  | 14.37  | 1.72 |
| -3 | -5 | 8  | 12.58  | 1.50 |
| -3 | -5 | 8  | 13.38  | 1.59 |
| -3 | -5 | 9  | 163.19 | 5.25 |
| -3 | -5 | 9  | 188.02 | 5.70 |
| -3 | -5 | 9  | 176.12 | 5.49 |
| -3 | -5 | 9  | 171.47 | 5.10 |
| -3 | -5 | 9  | 188.97 | 5.33 |
| -3 | -5 | 9  | 168.63 | 5.30 |
| -3 | -5 | 9  | 158.13 | 5.16 |
| -3 | -5 | 9  | 187.11 | 5.25 |
| -3 | -5 | 9  | 171.70 | 4.26 |
| -3 | -5 | 9  | 159.77 | 5.06 |
| -3 | -5 | 9  | 150.34 | 4.47 |
| -3 | -5 | 9  | 181.74 | 5.45 |
| -3 | -5 | 9  | 181.59 | 5.41 |
| -3 | -5 | 9  | 168.93 | 4.83 |
| -3 | -5 | 10 | 171.94 | 5.37 |
| -3 | -5 | 10 | 186.40 | 5.54 |
| -3 | -5 | 10 | 182.03 | 5.76 |
| -3 | -5 | 10 | 195.25 | 5.55 |
| -3 | -5 | 10 | 181.00 | 5.65 |
| -3 | -5 | 10 | 159.03 | 5.17 |
| -3 | -5 | 10 | 192.84 | 5.41 |
| -3 | -5 | 10 | 177.96 | 4.55 |
| -3 | -5 | 10 | 164.47 | 4.61 |
| -3 | -5 | 10 | 181.03 | 5.58 |
| -3 | -5 | 10 | 183.87 | 5.57 |
| -3 | -5 | 10 | 195.75 | 5.67 |
| -3 | -5 | 11 | 268.86 | 6.92 |
| -3 | -5 | 11 | 297.36 | 6.98 |
| -3 | -5 | 11 | 264.50 | 6.84 |
| -3 | -5 | 11 | 261.23 | 5.81 |
| -3 | -5 | 11 | 305.66 | 7.00 |
| -3 | -5 | 11 | 293.81 | 6.95 |
| -3 | -5 | 11 | 289.43 | 7.09 |
| -3 | -5 | 11 | 277.11 | 7.08 |
| -3 | -5 | 11 | 289.88 | 7.00 |
| -3 | -5 | 11 | 272.60 | 6.73 |

## CIF 31

|    |    |     |        |      |
|----|----|-----|--------|------|
| -3 | -5 | 12  | 247.54 | 6.22 |
| -3 | -5 | 12  | 230.48 | 5.30 |
| -3 | -5 | 12  | 265.69 | 6.52 |
| -3 | -5 | 12  | 220.37 | 5.73 |
| -3 | -5 | 12  | 198.43 | 5.95 |
| -3 | -5 | 12  | 240.57 | 6.14 |
| -3 | -5 | 12  | 222.34 | 6.00 |
| -3 | -5 | 12  | 213.76 | 5.93 |
| -3 | -5 | 12  | 230.35 | 6.06 |
| -3 | -5 | 12  | 206.25 | 5.84 |
| -3 | -5 | 12  | 222.94 | 5.77 |
| -3 | -5 | 13  | 258.96 | 5.64 |
| -3 | -5 | 13  | 249.11 | 6.22 |
| -3 | -5 | 13  | 256.82 | 6.09 |
| -3 | -5 | 13  | 237.31 | 5.74 |
| -3 | -5 | 13  | 262.34 | 6.05 |
| -3 | -5 | 13  | 265.33 | 6.18 |
| -3 | -5 | 13  | 227.80 | 5.32 |
| -3 | -5 | 13  | 246.68 | 6.04 |
| -3 | -5 | 13  | 241.92 | 5.27 |
| -3 | -5 | 13  | 248.21 | 5.93 |
| -3 | -5 | 13  | 216.84 | 5.48 |
| -3 | -5 | 14  | 16.23  | 1.58 |
| -3 | -5 | 14  | 16.06  | 1.60 |
| -3 | -5 | 14  | 13.52  | 1.41 |
| -3 | -5 | 14  | 17.01  | 1.33 |
| -3 | -5 | 14  | 14.69  | 1.45 |
| -3 | -5 | 14  | 13.88  | 1.35 |
| -3 | -5 | 15  | 275.38 | 4.86 |
| -3 | -5 | 15  | 292.01 | 5.19 |
| -3 | -5 | 15  | 273.20 | 5.13 |
| -3 | -5 | 15  | 298.95 | 5.33 |
| -3 | -4 | -10 | 147.42 | 2.76 |
| -3 | -4 | -10 | 145.11 | 3.75 |
| -3 | -4 | -9  | 1.10   | 0.60 |
| -3 | -4 | -9  | 1.12   | 0.76 |
| -3 | -4 | -9  | 0.75   | 0.68 |
| -3 | -4 | -9  | 0.15   | 0.95 |
| -3 | -4 | -8  | 18.62  | 1.60 |
| -3 | -4 | -8  | 11.66  | 1.79 |
| -3 | -4 | -8  | 15.70  | 1.53 |

## CIF 31

|    |    |    |         |       |
|----|----|----|---------|-------|
| -3 | -4 | -8 | 16.34   | 1.40  |
| -3 | -4 | -8 | 11.54   | 1.28  |
| -3 | -4 | -8 | 17.03   | 1.46  |
| -3 | -4 | -7 | -0.11   | 1.26  |
| -3 | -4 | -7 | 0.51    | 0.80  |
| -3 | -4 | -7 | 1.55    | 0.99  |
| -3 | -4 | -7 | 1.25    | 0.91  |
| -3 | -4 | -6 | 230.68  | 5.62  |
| -3 | -4 | -6 | 238.04  | 5.86  |
| -3 | -4 | -6 | 247.36  | 7.01  |
| -3 | -4 | -6 | 225.11  | 5.55  |
| -3 | -4 | -6 | 215.24  | 4.89  |
| -3 | -4 | -5 | 941.36  | 13.17 |
| -3 | -4 | -5 | 957.49  | 13.25 |
| -3 | -4 | -5 | 1001.55 | 15.32 |
| -3 | -4 | -5 | 894.17  | 12.57 |
| -3 | -4 | -5 | 924.27  | 12.76 |
| -3 | -4 | -5 | 908.11  | 15.91 |
| -3 | -4 | -5 | 948.29  | 12.41 |
| -3 | -4 | -4 | 116.77  | 3.75  |
| -3 | -4 | -4 | 108.52  | 3.83  |
| -3 | -4 | -4 | 117.88  | 6.65  |
| -3 | -4 | -4 | 108.21  | 3.72  |
| -3 | -4 | -4 | 125.78  | 4.63  |
| -3 | -4 | -4 | 112.35  | 3.78  |
| -3 | -4 | -4 | 113.11  | 3.59  |
| -3 | -4 | -3 | 185.97  | 4.91  |
| -3 | -4 | -3 | 184.75  | 4.73  |
| -3 | -4 | -3 | 173.80  | 4.50  |
| -3 | -4 | -3 | 183.45  | 4.80  |
| -3 | -4 | -3 | 187.47  | 4.87  |
| -3 | -4 | -3 | 184.48  | 4.56  |
| -3 | -4 | -3 | 193.32  | 5.46  |
| -3 | -4 | -2 | 292.05  | 6.01  |
| -3 | -4 | -2 | 280.11  | 6.30  |
| -3 | -4 | -2 | 291.03  | 7.11  |
| -3 | -4 | -2 | 284.49  | 5.68  |
| -3 | -4 | -2 | 289.71  | 6.11  |
| -3 | -4 | -2 | 276.94  | 5.75  |
| -3 | -4 | -1 | 473.18  | 8.86  |
| -3 | -4 | -1 | 452.40  | 7.33  |

## CIF 31

|    |    |    |         |       |
|----|----|----|---------|-------|
| -3 | -4 | -1 | 481.23  | 8.97  |
| -3 | -4 | -1 | 452.09  | 7.21  |
| -3 | -4 | -1 | 470.59  | 8.68  |
| -3 | -4 | -1 | 446.57  | 6.90  |
| -3 | -4 | -1 | 470.47  | 7.89  |
| -3 | -4 | -1 | 449.76  | 7.50  |
| -3 | -4 | 0  | 41.78   | 1.87  |
| -3 | -4 | 0  | 54.52   | 2.77  |
| -3 | -4 | 0  | 51.23   | 2.63  |
| -3 | -4 | 0  | 41.26   | 1.87  |
| -3 | -4 | 0  | 46.52   | 2.29  |
| -3 | -4 | 0  | 53.61   | 2.77  |
| -3 | -4 | 0  | 45.92   | 2.18  |
| -3 | -4 | 0  | 43.33   | 2.04  |
| -3 | -4 | 0  | 46.95   | 2.77  |
| -3 | -4 | 0  | 44.87   | 1.85  |
| -3 | -4 | 0  | 41.36   | 1.90  |
| -3 | -4 | 1  | 23.29   | 1.63  |
| -3 | -4 | 1  | 29.19   | 2.02  |
| -3 | -4 | 1  | 26.14   | 1.51  |
| -3 | -4 | 1  | 31.37   | 2.11  |
| -3 | -4 | 1  | 29.67   | 1.99  |
| -3 | -4 | 1  | 28.41   | 1.58  |
| -3 | -4 | 1  | 29.46   | 2.15  |
| -3 | -4 | 1  | 27.80   | 1.52  |
| -3 | -4 | 1  | 30.78   | 2.01  |
| -3 | -4 | 1  | 31.86   | 1.78  |
| -3 | -4 | 2  | 585.17  | 8.21  |
| -3 | -4 | 2  | 629.36  | 9.94  |
| -3 | -4 | 2  | 606.62  | 9.85  |
| -3 | -4 | 2  | 593.08  | 9.37  |
| -3 | -4 | 2  | 613.81  | 9.46  |
| -3 | -4 | 2  | 552.35  | 7.96  |
| -3 | -4 | 2  | 566.02  | 8.30  |
| -3 | -4 | 2  | 554.30  | 8.99  |
| -3 | -4 | 2  | 586.43  | 8.13  |
| -3 | -4 | 2  | 585.95  | 8.80  |
| -3 | -4 | 3  | 1439.64 | 16.30 |
| -3 | -4 | 3  | 1546.50 | 18.12 |
| -3 | -4 | 3  | 1497.25 | 14.70 |
| -3 | -4 | 3  | 1500.15 | 15.10 |



## CIF 31

|    |    |   |         |       |
|----|----|---|---------|-------|
| -3 | -4 | 3 | 1483.48 | 16.98 |
| -3 | -4 | 3 | 1478.13 | 16.11 |
| -3 | -4 | 3 | 1453.62 | 16.50 |
| -3 | -4 | 3 | 1542.36 | 16.56 |
| -3 | -4 | 3 | 1584.68 | 17.24 |
| -3 | -4 | 4 | 15.87   | 1.36  |
| -3 | -4 | 4 | 14.64   | 1.36  |
| -3 | -4 | 4 | 15.30   | 1.56  |
| -3 | -4 | 4 | 17.43   | 1.18  |
| -3 | -4 | 4 | 15.55   | 1.06  |
| -3 | -4 | 4 | 15.37   | 1.26  |
| -3 | -4 | 4 | 15.67   | 1.32  |
| -3 | -4 | 4 | 15.16   | 1.31  |
| -3 | -4 | 4 | 15.33   | 1.40  |
| -3 | -4 | 4 | 12.76   | 1.35  |
| -3 | -4 | 4 | 15.44   | 1.43  |
| -3 | -4 | 4 | 16.87   | 1.24  |
| -3 | -4 | 5 | 18.45   | 1.53  |
| -3 | -4 | 5 | 16.46   | 1.24  |
| -3 | -4 | 5 | 17.07   | 1.57  |
| -3 | -4 | 5 | 23.51   | 1.45  |
| -3 | -4 | 5 | 14.47   | 1.50  |
| -3 | -4 | 5 | 13.28   | 1.29  |
| -3 | -4 | 5 | 18.41   | 1.27  |
| -3 | -4 | 5 | 17.25   | 1.57  |
| -3 | -4 | 5 | 17.83   | 1.39  |
| -3 | -4 | 5 | 17.57   | 1.64  |
| -3 | -4 | 5 | 18.48   | 1.53  |
| -3 | -4 | 5 | 16.94   | 1.61  |
| -3 | -4 | 5 | 18.18   | 1.55  |
| -3 | -4 | 5 | 16.29   | 1.48  |
| -3 | -4 | 6 | 13.90   | 1.49  |
| -3 | -4 | 6 | 15.21   | 1.49  |
| -3 | -4 | 6 | 15.25   | 1.40  |
| -3 | -4 | 6 | 13.35   | 1.53  |
| -3 | -4 | 6 | 12.51   | 1.49  |
| -3 | -4 | 6 | 18.92   | 1.31  |
| -3 | -4 | 6 | 15.61   | 1.49  |
| -3 | -4 | 6 | 18.14   | 1.43  |
| -3 | -4 | 6 | 15.02   | 1.07  |
| -3 | -4 | 6 | 14.23   | 1.36  |

## CIF 31

|    |    |   |        |       |
|----|----|---|--------|-------|
| -3 | -4 | 6 | 13.76  | 1.36  |
| -3 | -4 | 6 | 12.60  | 1.47  |
| -3 | -4 | 6 | 15.56  | 1.55  |
| -3 | -4 | 6 | 14.38  | 1.44  |
| -3 | -4 | 6 | 15.24  | 1.43  |
| -3 | -4 | 7 | 6.00   | 1.13  |
| -3 | -4 | 7 | 6.42   | 1.39  |
| -3 | -4 | 7 | 5.71   | 0.99  |
| -3 | -4 | 7 | 6.00   | 1.12  |
| -3 | -4 | 7 | 7.14   | 1.23  |
| -3 | -4 | 7 | 5.86   | 0.79  |
| -3 | -4 | 7 | 5.26   | 0.96  |
| -3 | -4 | 7 | 8.84   | 1.30  |
| -3 | -4 | 7 | 4.20   | 1.13  |
| -3 | -4 | 7 | 7.46   | 1.17  |
| -3 | -4 | 7 | 4.66   | 1.12  |
| -3 | -4 | 7 | 5.83   | 1.03  |
| -3 | -4 | 7 | 4.52   | 1.09  |
| -3 | -4 | 7 | 4.59   | 1.10  |
| -3 | -4 | 7 | 5.67   | 1.01  |
| -3 | -4 | 8 | 2.17   | 0.74  |
| -3 | -4 | 8 | 2.96   | 0.88  |
| -3 | -4 | 8 | 11.62  | 1.77  |
| -3 | -4 | 8 | 2.68   | 1.06  |
| -3 | -4 | 8 | 2.81   | 1.11  |
| -3 | -4 | 8 | 2.19   | 1.06  |
| -3 | -4 | 8 | 11.62  | 1.53  |
| -3 | -4 | 8 | 3.75   | 1.31  |
| -3 | -4 | 8 | 4.07   | 1.16  |
| -3 | -4 | 8 | 3.54   | 1.10  |
| -3 | -4 | 8 | 2.63   | 1.00  |
| -3 | -4 | 8 | 2.46   | 0.83  |
| -3 | -4 | 8 | 2.45   | 1.01  |
| -3 | -4 | 8 | 6.17   | 1.25  |
| -3 | -4 | 8 | 2.29   | 1.04  |
| -3 | -4 | 9 | 767.42 | 11.69 |
| -3 | -4 | 9 | 778.82 | 11.94 |
| -3 | -4 | 9 | 681.53 | 11.51 |
| -3 | -4 | 9 | 724.20 | 11.51 |
| -3 | -4 | 9 | 682.12 | 10.64 |
| -3 | -4 | 9 | 740.39 | 11.88 |

CIF 31

|    |    |    |        |       |
|----|----|----|--------|-------|
| -3 | -4 | 9  | 697.78 | 11.62 |
| -3 | -4 | 9  | 692.84 | 9.94  |
| -3 | -4 | 9  | 671.59 | 11.26 |
| -3 | -4 | 9  | 635.99 | 10.85 |
| -3 | -4 | 9  | 656.05 | 11.25 |
| -3 | -4 | 9  | 614.20 | 10.07 |
| -3 | -4 | 9  | 743.09 | 11.73 |
| -3 | -4 | 9  | 700.09 | 11.20 |
| -3 | -4 | 9  | 659.38 | 9.98  |
| -3 | -4 | 10 | 361.34 | 7.95  |
| -3 | -4 | 10 | 348.19 | 7.01  |
| -3 | -4 | 10 | 334.43 | 7.83  |
| -3 | -4 | 10 | 355.21 | 8.05  |
| -3 | -4 | 10 | 368.30 | 8.20  |
| -3 | -4 | 10 | 370.87 | 7.92  |
| -3 | -4 | 10 | 412.71 | 8.38  |
| -3 | -4 | 10 | 377.06 | 8.23  |
| -3 | -4 | 10 | 327.88 | 6.71  |
| -3 | -4 | 10 | 341.72 | 7.66  |
| -3 | -4 | 10 | 333.25 | 7.84  |
| -3 | -4 | 10 | 365.41 | 8.03  |
| -3 | -4 | 10 | 339.93 | 7.05  |
| -3 | -4 | 10 | 372.70 | 7.76  |
| -3 | -4 | 11 | 184.53 | 5.47  |
| -3 | -4 | 11 | 183.63 | 5.56  |
| -3 | -4 | 11 | 180.38 | 5.61  |
| -3 | -4 | 11 | 126.19 | 4.94  |
| -3 | -4 | 11 | 156.38 | 5.46  |
| -3 | -4 | 11 | 167.50 | 5.48  |
| -3 | -4 | 11 | 177.83 | 4.93  |
| -3 | -4 | 11 | 203.18 | 5.84  |
| -3 | -4 | 11 | 153.78 | 5.15  |
| -3 | -4 | 11 | 178.29 | 5.51  |
| -3 | -4 | 11 | 170.16 | 5.46  |
| -3 | -4 | 11 | 175.87 | 5.20  |
| -3 | -4 | 12 | 123.09 | 4.49  |
| -3 | -4 | 12 | 104.95 | 4.37  |
| -3 | -4 | 12 | 103.13 | 4.19  |
| -3 | -4 | 12 | 107.85 | 4.27  |
| -3 | -4 | 12 | 98.72  | 4.23  |
| -3 | -4 | 12 | 111.80 | 4.36  |

## CIF 31

|    |    |     |        |      |
|----|----|-----|--------|------|
| -3 | -4 | 12  | 104.79 | 4.09 |
| -3 | -4 | 12  | 116.72 | 4.02 |
| -3 | -4 | 12  | 108.98 | 4.30 |
| -3 | -4 | 12  | 99.89  | 4.08 |
| -3 | -4 | 12  | 114.52 | 4.00 |
| -3 | -4 | 13  | 41.11  | 2.46 |
| -3 | -4 | 13  | 45.34  | 2.81 |
| -3 | -4 | 13  | 40.13  | 2.59 |
| -3 | -4 | 13  | 40.19  | 2.53 |
| -3 | -4 | 13  | 41.43  | 2.34 |
| -3 | -4 | 13  | 39.06  | 2.54 |
| -3 | -4 | 13  | 46.45  | 2.65 |
| -3 | -4 | 13  | 41.93  | 2.59 |
| -3 | -4 | 13  | 39.24  | 2.48 |
| -3 | -4 | 14  | 10.16  | 1.23 |
| -3 | -4 | 14  | 8.27   | 1.20 |
| -3 | -4 | 14  | 9.38   | 1.35 |
| -3 | -4 | 14  | 8.87   | 1.29 |
| -3 | -4 | 14  | 8.80   | 1.27 |
| -3 | -4 | 14  | 7.61   | 1.03 |
| -3 | -4 | 15  | 148.72 | 3.80 |
| -3 | -4 | 15  | 150.46 | 3.90 |
| -3 | -4 | 15  | 140.31 | 3.45 |
| -3 | -4 | 16  | 16.22  | 0.99 |
| -3 | -3 | -11 | 2.16   | 0.48 |
| -3 | -3 | -10 | 6.96   | 0.96 |
| -3 | -3 | -10 | 6.06   | 0.84 |
| -3 | -3 | -10 | 5.56   | 0.88 |
| -3 | -3 | -10 | 6.07   | 0.86 |
| -3 | -3 | -10 | 6.43   | 1.33 |
| -3 | -3 | -9  | 8.70   | 1.09 |
| -3 | -3 | -9  | 8.06   | 1.11 |
| -3 | -3 | -9  | 11.25  | 5.44 |
| -3 | -3 | -9  | 7.86   | 1.21 |
| -3 | -3 | -9  | 8.76   | 1.18 |
| -3 | -3 | -9  | 8.67   | 1.17 |
| -3 | -3 | -9  | 8.60   | 1.60 |
| -3 | -3 | -8  | 165.81 | 4.44 |
| -3 | -3 | -8  | 143.08 | 4.53 |
| -3 | -3 | -8  | 156.55 | 8.77 |
| -3 | -3 | -8  | 177.31 | 4.76 |

## CIF 31

|    |    |    |         |       |
|----|----|----|---------|-------|
| -3 | -3 | -8 | 152.15  | 5.65  |
| -3 | -3 | -8 | 176.66  | 4.81  |
| -3 | -3 | -8 | 172.34  | 4.73  |
| -3 | -3 | -7 | 19.55   | 1.76  |
| -3 | -3 | -7 | 16.19   | 7.99  |
| -3 | -3 | -7 | 21.74   | 1.93  |
| -3 | -3 | -7 | 23.39   | 1.97  |
| -3 | -3 | -7 | 17.56   | 2.17  |
| -3 | -3 | -7 | 15.46   | 4.05  |
| -3 | -3 | -7 | 19.80   | 1.75  |
| -3 | -3 | -6 | 444.28  | 11.87 |
| -3 | -3 | -6 | 447.36  | 8.18  |
| -3 | -3 | -6 | 440.78  | 9.00  |
| -3 | -3 | -6 | 445.31  | 8.25  |
| -3 | -3 | -6 | 432.94  | 9.62  |
| -3 | -3 | -6 | 433.08  | 10.04 |
| -3 | -3 | -6 | 438.48  | 8.37  |
| -3 | -3 | -6 | 428.71  | 8.12  |
| -3 | -3 | -6 | 446.09  | 7.51  |
| -3 | -3 | -5 | 537.88  | 9.06  |
| -3 | -3 | -5 | 553.69  | 9.27  |
| -3 | -3 | -5 | 516.83  | 10.32 |
| -3 | -3 | -5 | 537.69  | 9.51  |
| -3 | -3 | -5 | 490.55  | 8.21  |
| -3 | -3 | -5 | 508.24  | 10.13 |
| -3 | -3 | -5 | 590.84  | 12.23 |
| -3 | -3 | -5 | 541.79  | 8.98  |
| -3 | -3 | -5 | 553.71  | 8.54  |
| -3 | -3 | -4 | 1095.11 | 15.39 |
| -3 | -3 | -4 | 1093.93 | 13.84 |
| -3 | -3 | -4 | 1144.09 | 16.84 |
| -3 | -3 | -4 | 997.58  | 13.37 |
| -3 | -3 | -4 | 1076.98 | 14.13 |
| -3 | -3 | -4 | 1116.21 | 13.67 |
| -3 | -3 | -4 | 1008.46 | 13.85 |
| -3 | -3 | -4 | 1027.42 | 13.02 |
| -3 | -3 | -4 | 1095.24 | 13.45 |
| -3 | -3 | -3 | 494.40  | 8.13  |
| -3 | -3 | -3 | 489.99  | 7.85  |
| -3 | -3 | -3 | 496.46  | 10.01 |
| -3 | -3 | -3 | 512.75  | 8.30  |

## CIF 31

|    |    |    |         |       |
|----|----|----|---------|-------|
| -3 | -3 | -3 | 514.02  | 8.05  |
| -3 | -3 | -3 | 521.78  | 9.25  |
| -3 | -3 | -3 | 509.59  | 8.40  |
| -3 | -3 | -3 | 500.69  | 8.01  |
| -3 | -3 | -3 | 496.64  | 8.09  |
| -3 | -3 | -3 | 507.75  | 7.81  |
| -3 | -3 | -2 | 627.79  | 9.14  |
| -3 | -3 | -2 | 635.36  | 9.02  |
| -3 | -3 | -2 | 673.52  | 10.47 |
| -3 | -3 | -2 | 615.13  | 8.79  |
| -3 | -3 | -2 | 682.48  | 11.20 |
| -3 | -3 | -2 | 649.16  | 10.35 |
| -3 | -3 | -2 | 650.17  | 9.00  |
| -3 | -3 | -2 | 629.31  | 9.11  |
| -3 | -3 | -2 | 655.43  | 9.29  |
| -3 | -3 | -2 | 671.93  | 10.10 |
| -3 | -3 | -1 | 4484.03 | 42.43 |
| -3 | -3 | -1 | 4716.73 | 43.46 |
| -3 | -3 | -1 | 4743.74 | 43.03 |
| -3 | -3 | -1 | 4780.83 | 43.08 |
| -3 | -3 | -1 | 4391.81 | 40.56 |
| -3 | -3 | -1 | 4386.51 | 40.64 |
| -3 | -3 | -1 | 4668.86 | 43.66 |
| -3 | -3 | -1 | 4411.59 | 41.33 |
| -3 | -3 | -1 | 4512.73 | 41.38 |
| -3 | -3 | 0  | 727.95  | 9.97  |
| -3 | -3 | 0  | 794.93  | 11.45 |
| -3 | -3 | 0  | 753.35  | 11.19 |
| -3 | -3 | 0  | 794.92  | 10.72 |
| -3 | -3 | 0  | 784.89  | 10.63 |
| -3 | -3 | 0  | 812.99  | 10.97 |
| -3 | -3 | 0  | 753.65  | 9.30  |
| -3 | -3 | 0  | 743.42  | 9.88  |
| -3 | -3 | 0  | 747.86  | 9.57  |
| -3 | -3 | 0  | 745.25  | 9.12  |
| -3 | -3 | 1  | 2267.14 | 21.40 |
| -3 | -3 | 1  | 2190.74 | 20.20 |
| -3 | -3 | 1  | 2178.56 | 23.71 |
| -3 | -3 | 1  | 2321.28 | 23.13 |
| -3 | -3 | 1  | 2252.36 | 22.60 |
| -3 | -3 | 1  | 2294.49 | 22.32 |

## CIF 31

|    |    |   |         |       |
|----|----|---|---------|-------|
| -3 | -3 | 1 | 2085.05 | 22.52 |
| -3 | -3 | 1 | 2329.55 | 21.67 |
| -3 | -3 | 1 | 2270.79 | 22.81 |
| -3 | -3 | 2 | 250.69  | 3.95  |
| -3 | -3 | 2 | 231.48  | 5.28  |
| -3 | -3 | 2 | 254.24  | 3.78  |
| -3 | -3 | 2 | 260.11  | 4.41  |
| -3 | -3 | 2 | 243.55  | 4.96  |
| -3 | -3 | 2 | 240.35  | 5.06  |
| -3 | -3 | 2 | 245.92  | 5.00  |
| -3 | -3 | 2 | 257.85  | 4.65  |
| -3 | -3 | 2 | 263.83  | 5.03  |
| -3 | -3 | 3 | 997.58  | 11.71 |
| -3 | -3 | 3 | 1026.08 | 10.88 |
| -3 | -3 | 3 | 1035.35 | 12.77 |
| -3 | -3 | 3 | 1071.14 | 12.79 |
| -3 | -3 | 3 | 987.33  | 10.57 |
| -3 | -3 | 3 | 976.65  | 11.03 |
| -3 | -3 | 3 | 914.20  | 12.00 |
| -3 | -3 | 3 | 1058.31 | 11.87 |
| -3 | -3 | 3 | 871.52  | 11.65 |
| -3 | -3 | 3 | 983.41  | 11.61 |
| -3 | -3 | 4 | 88.89   | 2.86  |
| -3 | -3 | 4 | 98.22   | 3.07  |
| -3 | -3 | 4 | 87.66   | 2.77  |
| -3 | -3 | 4 | 84.25   | 2.44  |
| -3 | -3 | 4 | 110.78  | 3.29  |
| -3 | -3 | 4 | 93.44   | 2.88  |
| -3 | -3 | 4 | 85.66   | 2.42  |
| -3 | -3 | 4 | 78.14   | 1.83  |
| -3 | -3 | 4 | 92.75   | 2.93  |
| -3 | -3 | 4 | 99.21   | 2.90  |
| -3 | -3 | 4 | 91.59   | 2.91  |
| -3 | -3 | 4 | 94.11   | 2.64  |
| -3 | -3 | 4 | 93.28   | 2.69  |
| -3 | -3 | 4 | 92.15   | 3.02  |
| -3 | -3 | 5 | 696.36  | 8.82  |
| -3 | -3 | 5 | 606.92  | 9.02  |
| -3 | -3 | 5 | 674.70  | 9.30  |
| -3 | -3 | 5 | 688.57  | 9.33  |
| -3 | -3 | 5 | 605.85  | 8.94  |

## CIF 31

|    |    |   |        |       |
|----|----|---|--------|-------|
| -3 | -3 | 5 | 716.01 | 8.92  |
| -3 | -3 | 5 | 616.56 | 9.28  |
| -3 | -3 | 5 | 649.26 | 7.58  |
| -3 | -3 | 5 | 653.34 | 8.73  |
| -3 | -3 | 5 | 663.47 | 9.27  |
| -3 | -3 | 5 | 615.99 | 9.14  |
| -3 | -3 | 5 | 630.43 | 9.05  |
| -3 | -3 | 5 | 615.88 | 8.87  |
| -3 | -3 | 5 | 675.46 | 9.14  |
| -3 | -3 | 6 | 695.58 | 9.99  |
| -3 | -3 | 6 | 745.43 | 9.66  |
| -3 | -3 | 6 | 629.30 | 9.27  |
| -3 | -3 | 6 | 633.08 | 9.47  |
| -3 | -3 | 6 | 644.97 | 9.49  |
| -3 | -3 | 6 | 722.13 | 10.15 |
| -3 | -3 | 6 | 607.45 | 8.93  |
| -3 | -3 | 6 | 705.07 | 9.43  |
| -3 | -3 | 6 | 667.55 | 8.20  |
| -3 | -3 | 6 | 581.73 | 8.91  |
| -3 | -3 | 6 | 629.25 | 9.02  |
| -3 | -3 | 6 | 655.53 | 9.56  |
| -3 | -3 | 6 | 660.48 | 9.72  |
| -3 | -3 | 6 | 688.09 | 9.25  |
| -3 | -3 | 7 | 573.56 | 9.58  |
| -3 | -3 | 7 | 645.71 | 9.73  |
| -3 | -3 | 7 | 662.32 | 9.86  |
| -3 | -3 | 7 | 624.96 | 9.81  |
| -3 | -3 | 7 | 582.40 | 9.24  |
| -3 | -3 | 7 | 652.51 | 10.06 |
| -3 | -3 | 7 | 655.22 | 9.58  |
| -3 | -3 | 7 | 618.53 | 8.39  |
| -3 | -3 | 7 | 644.74 | 9.50  |
| -3 | -3 | 7 | 615.50 | 9.40  |
| -3 | -3 | 7 | 632.93 | 9.80  |
| -3 | -3 | 7 | 673.99 | 9.77  |
| -3 | -3 | 7 | 655.28 | 9.08  |
| -3 | -3 | 8 | 186.67 | 4.87  |
| -3 | -3 | 8 | 205.40 | 5.45  |
| -3 | -3 | 8 | 254.16 | 5.64  |
| -3 | -3 | 8 | 205.06 | 5.36  |
| -3 | -3 | 8 | 225.73 | 5.49  |



## CIF 31

|    |    |    |        |       |
|----|----|----|--------|-------|
| -3 | -3 | 8  | 233.81 | 5.80  |
| -3 | -3 | 8  | 202.81 | 4.57  |
| -3 | -3 | 8  | 217.39 | 5.57  |
| -3 | -3 | 8  | 198.73 | 5.04  |
| -3 | -3 | 8  | 208.75 | 5.38  |
| -3 | -3 | 8  | 208.96 | 5.54  |
| -3 | -3 | 8  | 230.31 | 5.43  |
| -3 | -3 | 8  | 191.29 | 4.40  |
| -3 | -3 | 9  | 26.12  | 1.90  |
| -3 | -3 | 9  | 29.57  | 2.25  |
| -3 | -3 | 9  | 24.07  | 2.09  |
| -3 | -3 | 9  | 29.80  | 2.08  |
| -3 | -3 | 9  | 31.31  | 2.03  |
| -3 | -3 | 9  | 35.02  | 2.57  |
| -3 | -3 | 9  | 30.89  | 2.57  |
| -3 | -3 | 9  | 27.55  | 2.25  |
| -3 | -3 | 9  | 30.84  | 2.09  |
| -3 | -3 | 9  | 27.78  | 1.99  |
| -3 | -3 | 9  | 25.81  | 2.16  |
| -3 | -3 | 9  | 28.05  | 1.62  |
| -3 | -3 | 10 | 848.82 | 13.19 |
| -3 | -3 | 10 | 847.94 | 13.33 |
| -3 | -3 | 10 | 799.84 | 12.86 |
| -3 | -3 | 10 | 723.14 | 11.62 |
| -3 | -3 | 10 | 942.03 | 12.75 |
| -3 | -3 | 10 | 813.71 | 13.15 |
| -3 | -3 | 10 | 890.93 | 13.36 |
| -3 | -3 | 10 | 817.28 | 11.86 |
| -3 | -3 | 10 | 776.69 | 12.00 |
| -3 | -3 | 10 | 808.83 | 12.12 |
| -3 | -3 | 11 | 8.64   | 1.62  |
| -3 | -3 | 11 | 13.03  | 1.83  |
| -3 | -3 | 11 | 8.51   | 1.58  |
| -3 | -3 | 11 | 10.58  | 1.63  |
| -3 | -3 | 11 | 8.83   | 1.32  |
| -3 | -3 | 11 | 8.51   | 1.51  |
| -3 | -3 | 11 | 9.31   | 1.33  |
| -3 | -3 | 11 | 9.37   | 1.34  |
| -3 | -3 | 11 | 9.62   | 1.35  |
| -3 | -3 | 11 | 11.74  | 1.73  |
| -3 | -3 | 12 | 198.42 | 5.74  |

## CIF 31

|    |    |     |        |      |
|----|----|-----|--------|------|
| -3 | -3 | 12  | 152.86 | 4.60 |
| -3 | -3 | 12  | 211.26 | 6.14 |
| -3 | -3 | 12  | 185.85 | 5.68 |
| -3 | -3 | 12  | 202.90 | 5.69 |
| -3 | -3 | 12  | 185.26 | 5.69 |
| -3 | -3 | 12  | 208.97 | 5.53 |
| -3 | -3 | 12  | 182.82 | 5.62 |
| -3 | -3 | 12  | 177.29 | 5.64 |
| -3 | -3 | 12  | 177.60 | 4.79 |
| -3 | -3 | 13  | 54.64  | 3.13 |
| -3 | -3 | 13  | 64.18  | 3.30 |
| -3 | -3 | 13  | 58.69  | 2.99 |
| -3 | -3 | 13  | 60.79  | 3.16 |
| -3 | -3 | 13  | 61.91  | 3.10 |
| -3 | -3 | 13  | 57.20  | 2.85 |
| -3 | -3 | 13  | 56.27  | 2.95 |
| -3 | -3 | 13  | 56.00  | 3.07 |
| -3 | -3 | 13  | 61.13  | 3.16 |
| -3 | -3 | 14  | 445.92 | 7.88 |
| -3 | -3 | 14  | 444.83 | 8.38 |
| -3 | -3 | 14  | 435.07 | 8.19 |
| -3 | -3 | 14  | 469.58 | 8.01 |
| -3 | -3 | 14  | 431.37 | 7.89 |
| -3 | -3 | 14  | 457.55 | 7.86 |
| -3 | -3 | 14  | 426.80 | 8.23 |
| -3 | -3 | 14  | 457.09 | 8.26 |
| -3 | -3 | 14  | 416.12 | 7.96 |
| -3 | -3 | 15  | 7.00   | 1.04 |
| -3 | -3 | 15  | 9.34   | 1.21 |
| -3 | -3 | 15  | 7.55   | 0.91 |
| -3 | -3 | 15  | 9.48   | 1.13 |
| -3 | -3 | 16  | 218.57 | 4.00 |
| -3 | -3 | 16  | 234.98 | 3.94 |
| -3 | -2 | -11 | 15.47  | 1.63 |
| -3 | -2 | -11 | 16.47  | 1.17 |
| -3 | -2 | -11 | 21.14  | 1.26 |
| -3 | -2 | -11 | 21.40  | 1.36 |
| -3 | -2 | -10 | 1.25   | 0.68 |
| -3 | -2 | -10 | -1.96  | 6.02 |
| -3 | -2 | -10 | 0.47   | 0.65 |
| -3 | -2 | -10 | 0.38   | 0.88 |

## CIF 31

|    |    |     |        |      |
|----|----|-----|--------|------|
| -3 | -2 | -10 | 0.57   | 0.80 |
| -3 | -2 | -9  | 50.24  | 2.39 |
| -3 | -2 | -9  | 48.06  | 2.37 |
| -3 | -2 | -9  | 42.01  | 4.07 |
| -3 | -2 | -9  | 49.43  | 2.57 |
| -3 | -2 | -9  | 42.70  | 2.47 |
| -3 | -2 | -9  | 47.08  | 2.53 |
| -3 | -2 | -8  | 117.04 | 3.88 |
| -3 | -2 | -8  | 123.25 | 4.01 |
| -3 | -2 | -8  | 131.39 | 7.49 |
| -3 | -2 | -8  | 123.33 | 5.19 |
| -3 | -2 | -8  | 128.65 | 4.14 |
| -3 | -2 | -8  | 106.85 | 7.58 |
| -3 | -2 | -8  | 116.94 | 4.67 |
| -3 | -2 | -8  | 114.59 | 4.03 |
| -3 | -2 | -8  | 121.92 | 4.30 |
| -3 | -2 | -8  | 123.13 | 5.98 |
| -3 | -2 | -7  | 100.53 | 4.19 |
| -3 | -2 | -7  | 87.99  | 3.42 |
| -3 | -2 | -7  | 83.64  | 4.27 |
| -3 | -2 | -7  | 84.32  | 5.61 |
| -3 | -2 | -7  | 101.33 | 3.69 |
| -3 | -2 | -7  | 98.07  | 5.98 |
| -3 | -2 | -7  | 96.24  | 3.92 |
| -3 | -2 | -7  | 92.66  | 3.58 |
| -3 | -2 | -7  | 89.96  | 3.07 |
| -3 | -2 | -7  | 82.73  | 3.56 |
| -3 | -2 | -7  | 92.59  | 3.54 |
| -3 | -2 | -6  | 17.94  | 1.65 |
| -3 | -2 | -6  | 16.33  | 1.58 |
| -3 | -2 | -6  | 9.62   | 2.96 |
| -3 | -2 | -6  | 10.08  | 1.85 |
| -3 | -2 | -6  | 15.58  | 1.64 |
| -3 | -2 | -6  | 15.55  | 1.59 |
| -3 | -2 | -6  | 16.51  | 3.37 |
| -3 | -2 | -6  | 15.66  | 1.73 |
| -3 | -2 | -6  | 16.39  | 1.55 |
| -3 | -2 | -6  | 14.16  | 1.37 |
| -3 | -2 | -5  | 567.12 | 8.79 |
| -3 | -2 | -5  | 598.47 | 9.68 |
| -3 | -2 | -5  | 607.73 | 9.31 |

## CIF 31

|    |    |    |         |       |
|----|----|----|---------|-------|
| -3 | -2 | -5 | 563.03  | 8.56  |
| -3 | -2 | -5 | 570.66  | 9.12  |
| -3 | -2 | -5 | 634.67  | 11.18 |
| -3 | -2 | -5 | 603.06  | 9.32  |
| -3 | -2 | -5 | 583.55  | 9.34  |
| -3 | -2 | -5 | 588.26  | 9.10  |
| -3 | -2 | -5 | 566.96  | 8.27  |
| -3 | -2 | -5 | 610.18  | 10.87 |
| -3 | -2 | -4 | 342.71  | 6.33  |
| -3 | -2 | -4 | 325.10  | 6.08  |
| -3 | -2 | -4 | 313.22  | 5.76  |
| -3 | -2 | -4 | 396.51  | 8.10  |
| -3 | -2 | -4 | 336.63  | 6.25  |
| -3 | -2 | -4 | 380.62  | 7.67  |
| -3 | -2 | -4 | 314.14  | 6.19  |
| -3 | -2 | -4 | 334.21  | 5.81  |
| -3 | -2 | -4 | 329.44  | 6.26  |
| -3 | -2 | -4 | 320.66  | 5.85  |
| -3 | -2 | -4 | 334.25  | 6.29  |
| -3 | -2 | -3 | 1343.44 | 15.00 |
| -3 | -2 | -3 | 1372.05 | 16.47 |
| -3 | -2 | -3 | 1384.60 | 17.06 |
| -3 | -2 | -3 | 1259.55 | 14.72 |
| -3 | -2 | -3 | 1288.71 | 14.68 |
| -3 | -2 | -3 | 1337.42 | 14.57 |
| -3 | -2 | -3 | 1311.33 | 14.55 |
| -3 | -2 | -2 | 725.93  | 10.76 |
| -3 | -2 | -2 | 706.96  | 10.00 |
| -3 | -2 | -2 | 671.02  | 10.57 |
| -3 | -2 | -2 | 730.89  | 10.24 |
| -3 | -2 | -2 | 694.27  | 10.01 |
| -3 | -2 | -2 | 683.34  | 8.95  |
| -3 | -2 | -1 | 1232.45 | 15.01 |
| -3 | -2 | -1 | 1229.82 | 13.02 |
| -3 | -2 | 0  | 547.19  | 7.62  |
| -3 | -2 | 0  | 534.34  | 6.69  |
| -3 | -2 | 0  | 571.01  | 7.51  |
| -3 | -2 | 0  | 562.88  | 6.29  |
| -3 | -2 | 0  | 555.61  | 7.04  |
| -3 | -2 | 0  | 568.40  | 7.81  |
| -3 | -2 | 1  | 4420.98 | 38.07 |

## CIF 31

|    |    |   |         |       |
|----|----|---|---------|-------|
| -3 | -2 | 1 | 4537.22 | 40.95 |
| -3 | -2 | 1 | 4445.59 | 37.85 |
| -3 | -2 | 1 | 4533.50 | 39.80 |
| -3 | -2 | 1 | 4453.55 | 39.42 |
| -3 | -2 | 1 | 4531.55 | 38.31 |
| -3 | -2 | 1 | 4693.26 | 39.10 |
| -3 | -2 | 1 | 4612.75 | 39.84 |
| -3 | -2 | 2 | 882.97  | 9.24  |
| -3 | -2 | 2 | 875.07  | 10.46 |
| -3 | -2 | 2 | 862.42  | 9.42  |
| -3 | -2 | 2 | 904.72  | 11.18 |
| -3 | -2 | 2 | 888.06  | 9.97  |
| -3 | -2 | 2 | 899.93  | 10.51 |
| -3 | -2 | 2 | 858.05  | 9.30  |
| -3 | -2 | 2 | 897.72  | 10.44 |
| -3 | -2 | 2 | 901.92  | 10.07 |
| -3 | -2 | 3 | 73.96   | 1.97  |
| -3 | -2 | 3 | 62.33   | 2.26  |
| -3 | -2 | 3 | 70.56   | 1.99  |
| -3 | -2 | 3 | 78.21   | 2.60  |
| -3 | -2 | 3 | 68.69   | 2.12  |
| -3 | -2 | 3 | 66.01   | 1.89  |
| -3 | -2 | 3 | 63.30   | 1.49  |
| -3 | -2 | 3 | 65.22   | 2.22  |
| -3 | -2 | 3 | 69.85   | 2.35  |
| -3 | -2 | 3 | 70.32   | 2.30  |
| -3 | -2 | 3 | 71.72   | 2.21  |
| -3 | -2 | 3 | 71.01   | 2.27  |
| -3 | -2 | 4 | 353.27  | 5.87  |
| -3 | -2 | 4 | 361.12  | 5.63  |
| -3 | -2 | 4 | 389.95  | 6.06  |
| -3 | -2 | 4 | 369.49  | 5.50  |
| -3 | -2 | 4 | 322.71  | 5.75  |
| -3 | -2 | 4 | 323.56  | 5.73  |
| -3 | -2 | 4 | 382.38  | 5.46  |
| -3 | -2 | 4 | 344.97  | 4.63  |
| -3 | -2 | 4 | 362.08  | 5.80  |
| -3 | -2 | 4 | 382.34  | 5.37  |
| -3 | -2 | 4 | 360.51  | 5.89  |
| -3 | -2 | 4 | 356.90  | 5.59  |
| -3 | -2 | 5 | 813.44  | 9.89  |

## CIF 31

|    |    |   |         |       |
|----|----|---|---------|-------|
| -3 | -2 | 5 | 739.00  | 9.88  |
| -3 | -2 | 5 | 868.35  | 10.67 |
| -3 | -2 | 5 | 868.28  | 10.46 |
| -3 | -2 | 5 | 921.01  | 10.46 |
| -3 | -2 | 5 | 898.02  | 10.29 |
| -3 | -2 | 5 | 731.94  | 8.84  |
| -3 | -2 | 5 | 791.26  | 9.97  |
| -3 | -2 | 5 | 866.02  | 9.99  |
| -3 | -2 | 5 | 887.98  | 10.68 |
| -3 | -2 | 5 | 818.24  | 10.09 |
| -3 | -2 | 5 | 714.80  | 10.16 |
| -3 | -2 | 6 | 442.56  | 7.05  |
| -3 | -2 | 6 | 439.53  | 7.23  |
| -3 | -2 | 6 | 434.14  | 6.82  |
| -3 | -2 | 6 | 437.38  | 7.39  |
| -3 | -2 | 6 | 461.32  | 7.13  |
| -3 | -2 | 6 | 395.45  | 7.04  |
| -3 | -2 | 6 | 418.24  | 6.19  |
| -3 | -2 | 6 | 484.20  | 7.45  |
| -3 | -2 | 6 | 483.44  | 7.14  |
| -3 | -2 | 6 | 427.75  | 6.43  |
| -3 | -2 | 7 | 1144.42 | 14.62 |
| -3 | -2 | 7 | 1344.09 | 14.93 |
| -3 | -2 | 7 | 1192.94 | 14.49 |
| -3 | -2 | 7 | 1227.07 | 13.69 |
| -3 | -2 | 7 | 1271.51 | 14.76 |
| -3 | -2 | 7 | 1176.57 | 14.01 |
| -3 | -2 | 7 | 1231.69 | 14.79 |
| -3 | -2 | 7 | 1203.18 | 11.94 |
| -3 | -2 | 7 | 1271.11 | 14.45 |
| -3 | -2 | 7 | 1247.50 | 15.09 |
| -3 | -2 | 7 | 1182.33 | 13.27 |
| -3 | -2 | 8 | 115.94  | 3.74  |
| -3 | -2 | 8 | 118.38  | 4.01  |
| -3 | -2 | 8 | 125.25  | 3.88  |
| -3 | -2 | 8 | 115.63  | 4.05  |
| -3 | -2 | 8 | 101.67  | 3.27  |
| -3 | -2 | 8 | 126.28  | 3.57  |
| -3 | -2 | 8 | 135.62  | 4.25  |
| -3 | -2 | 8 | 124.52  | 3.93  |
| -3 | -2 | 8 | 122.27  | 3.69  |

## CIF 31

|    |    |    |        |      |
|----|----|----|--------|------|
| -3 | -2 | 8  | 113.11 | 2.91 |
| -3 | -2 | 9  | 16.54  | 1.86 |
| -3 | -2 | 9  | 18.05  | 1.71 |
| -3 | -2 | 9  | 19.92  | 1.60 |
| -3 | -2 | 9  | 19.51  | 1.90 |
| -3 | -2 | 9  | 22.01  | 1.80 |
| -3 | -2 | 9  | 19.24  | 1.69 |
| -3 | -2 | 9  | 20.65  | 1.97 |
| -3 | -2 | 9  | 18.40  | 1.74 |
| -3 | -2 | 10 | 12.97  | 1.66 |
| -3 | -2 | 10 | 14.34  | 1.59 |
| -3 | -2 | 10 | 12.46  | 1.81 |
| -3 | -2 | 10 | 16.15  | 1.81 |
| -3 | -2 | 10 | 12.76  | 1.75 |
| -3 | -2 | 10 | 17.01  | 1.72 |
| -3 | -2 | 10 | 14.80  | 2.04 |
| -3 | -2 | 10 | 12.75  | 1.55 |
| -3 | -2 | 10 | 15.53  | 1.48 |
| -3 | -2 | 11 | 302.63 | 7.63 |
| -3 | -2 | 11 | 283.99 | 6.67 |
| -3 | -2 | 11 | 309.92 | 7.08 |
| -3 | -2 | 11 | 294.91 | 6.88 |
| -3 | -2 | 11 | 310.70 | 6.97 |
| -3 | -2 | 11 | 278.48 | 6.77 |
| -3 | -2 | 11 | 287.09 | 7.45 |
| -3 | -2 | 11 | 294.23 | 6.15 |
| -3 | -2 | 11 | 299.10 | 7.49 |
| -3 | -2 | 12 | 235.20 | 5.89 |
| -3 | -2 | 12 | 244.56 | 6.25 |
| -3 | -2 | 12 | 277.48 | 6.75 |
| -3 | -2 | 12 | 261.75 | 6.35 |
| -3 | -2 | 12 | 260.03 | 7.12 |
| -3 | -2 | 12 | 243.33 | 6.14 |
| -3 | -2 | 12 | 246.86 | 6.76 |
| -3 | -2 | 12 | 231.81 | 6.03 |
| -3 | -2 | 12 | 262.39 | 7.05 |
| -3 | -2 | 13 | 57.82  | 3.14 |
| -3 | -2 | 13 | 68.86  | 3.12 |
| -3 | -2 | 13 | 60.21  | 3.20 |
| -3 | -2 | 13 | 63.59  | 2.90 |
| -3 | -2 | 13 | 70.46  | 3.24 |

## CIF 31

|    |    |     |        |      |
|----|----|-----|--------|------|
| -3 | -2 | 13  | 73.47  | 3.27 |
| -3 | -2 | 13  | 64.94  | 3.41 |
| -3 | -2 | 13  | 63.51  | 2.73 |
| -3 | -2 | 13  | 60.56  | 3.32 |
| -3 | -2 | 14  | 71.65  | 3.23 |
| -3 | -2 | 14  | 69.55  | 2.80 |
| -3 | -2 | 14  | 74.60  | 3.19 |
| -3 | -2 | 14  | 75.58  | 3.03 |
| -3 | -2 | 14  | 69.66  | 3.08 |
| -3 | -2 | 14  | 68.20  | 3.18 |
| -3 | -2 | 14  | 64.83  | 3.06 |
| -3 | -2 | 15  | 1.91   | 0.81 |
| -3 | -2 | 15  | 1.85   | 0.76 |
| -3 | -2 | 15  | 1.20   | 0.90 |
| -3 | -2 | 15  | 1.35   | 0.82 |
| -3 | -2 | 15  | 1.50   | 0.81 |
| -3 | -2 | 16  | 27.03  | 1.36 |
| -3 | -1 | -12 | 80.95  | 2.80 |
| -3 | -1 | -12 | 68.24  | 4.10 |
| -3 | -1 | -11 | 38.07  | 6.16 |
| -3 | -1 | -11 | 43.54  | 1.89 |
| -3 | -1 | -11 | 41.37  | 2.62 |
| -3 | -1 | -11 | 38.50  | 2.03 |
| -3 | -1 | -10 | 4.36   | 0.94 |
| -3 | -1 | -10 | 8.98   | 4.57 |
| -3 | -1 | -10 | 9.18   | 1.29 |
| -3 | -1 | -10 | 3.55   | 0.95 |
| -3 | -1 | -10 | 4.96   | 0.91 |
| -3 | -1 | -10 | 11.14  | 1.86 |
| -3 | -1 | -10 | 0.39   | 6.22 |
| -3 | -1 | -9  | 288.02 | 6.01 |
| -3 | -1 | -9  | 291.68 | 8.00 |
| -3 | -1 | -9  | 267.35 | 7.69 |
| -3 | -1 | -9  | 267.66 | 6.55 |
| -3 | -1 | -9  | 282.54 | 8.56 |
| -3 | -1 | -9  | 304.36 | 6.41 |
| -3 | -1 | -9  | 282.63 | 6.61 |
| -3 | -1 | -9  | 287.08 | 6.07 |
| -3 | -1 | -9  | 288.19 | 8.18 |
| -3 | -1 | -8  | 0.43   | 0.79 |
| -3 | -1 | -8  | 0.61   | 0.89 |



## CIF 31

|    |    |    |        |       |
|----|----|----|--------|-------|
| -3 | -1 | -8 | 1.29   | 1.49  |
| -3 | -1 | -8 | 0.89   | 0.87  |
| -3 | -1 | -8 | 1.63   | 2.65  |
| -3 | -1 | -8 | -0.04  | 0.92  |
| -3 | -1 | -8 | 0.84   | 3.13  |
| -3 | -1 | -8 | 0.70   | 0.93  |
| -3 | -1 | -8 | 0.12   | 0.96  |
| -3 | -1 | -7 | 628.00 | 10.28 |
| -3 | -1 | -7 | 652.92 | 10.19 |
| -3 | -1 | -7 | 678.15 | 10.75 |
| -3 | -1 | -7 | 705.25 | 12.52 |
| -3 | -1 | -7 | 689.44 | 10.28 |
| -3 | -1 | -7 | 694.99 | 10.36 |
| -3 | -1 | -7 | 634.36 | 10.74 |
| -3 | -1 | -7 | 659.29 | 10.65 |
| -3 | -1 | -7 | 603.86 | 10.03 |
| -3 | -1 | -7 | 653.03 | 9.48  |
| -3 | -1 | -6 | 152.49 | 4.30  |
| -3 | -1 | -6 | 155.26 | 4.38  |
| -3 | -1 | -6 | 173.89 | 5.51  |
| -3 | -1 | -6 | 155.65 | 4.28  |
| -3 | -1 | -6 | 166.42 | 4.42  |
| -3 | -1 | -6 | 181.29 | 5.73  |
| -3 | -1 | -6 | 149.78 | 4.55  |
| -3 | -1 | -6 | 150.80 | 4.45  |
| -3 | -1 | -6 | 142.73 | 4.16  |
| -3 | -1 | -6 | 140.06 | 3.85  |
| -3 | -1 | -5 | 76.18  | 2.85  |
| -3 | -1 | -5 | 72.60  | 2.77  |
| -3 | -1 | -5 | 70.00  | 2.80  |
| -3 | -1 | -5 | 77.32  | 2.83  |
| -3 | -1 | -5 | 77.85  | 2.85  |
| -3 | -1 | -5 | 78.51  | 3.01  |
| -3 | -1 | -5 | 74.25  | 2.76  |
| -3 | -1 | -5 | 68.58  | 2.50  |
| -3 | -1 | -5 | 84.45  | 3.65  |
| -3 | -1 | -4 | 167.61 | 4.01  |
| -3 | -1 | -4 | 167.64 | 4.03  |
| -3 | -1 | -4 | 204.11 | 5.29  |
| -3 | -1 | -4 | 203.31 | 5.19  |
| -3 | -1 | -4 | 169.11 | 4.02  |

## CIF 31

|    |    |    |         |       |
|----|----|----|---------|-------|
| -3 | -1 | -4 | 156.26  | 3.84  |
| -3 | -1 | -4 | 169.21  | 4.11  |
| -3 | -1 | -4 | 168.99  | 3.53  |
| -3 | -1 | -4 | 162.55  | 3.76  |
| -3 | -1 | -3 | 986.41  | 12.89 |
| -3 | -1 | -3 | 954.52  | 12.59 |
| -3 | -1 | -3 | 979.40  | 10.89 |
| -3 | -1 | -2 | 1370.52 | 13.99 |
| -3 | -1 | -1 | 118.57  | 2.73  |
| -3 | -1 | 0  | 1344.04 | 13.03 |
| -3 | -1 | 0  | 1359.53 | 15.15 |
| -3 | -1 | 0  | 1374.55 | 13.91 |
| -3 | -1 | 0  | 1390.79 | 13.22 |
| -3 | -1 | 0  | 1358.95 | 14.14 |
| -3 | -1 | 1  | 987.68  | 10.04 |
| -3 | -1 | 1  | 992.47  | 9.95  |
| -3 | -1 | 1  | 989.75  | 9.18  |
| -3 | -1 | 1  | 986.77  | 10.67 |
| -3 | -1 | 1  | 1027.20 | 11.17 |
| -3 | -1 | 1  | 999.46  | 10.45 |
| -3 | -1 | 1  | 1033.79 | 10.79 |
| -3 | -1 | 2  | 885.13  | 8.56  |
| -3 | -1 | 2  | 887.81  | 9.30  |
| -3 | -1 | 2  | 905.45  | 9.27  |
| -3 | -1 | 2  | 917.75  | 9.99  |
| -3 | -1 | 2  | 851.15  | 10.40 |
| -3 | -1 | 2  | 799.90  | 9.85  |
| -3 | -1 | 2  | 853.22  | 9.73  |
| -3 | -1 | 2  | 920.23  | 9.70  |
| -3 | -1 | 3  | 1292.74 | 12.73 |
| -3 | -1 | 3  | 1324.34 | 13.68 |
| -3 | -1 | 3  | 1233.28 | 12.51 |
| -3 | -1 | 3  | 1170.03 | 11.83 |
| -3 | -1 | 3  | 1228.08 | 13.15 |
| -3 | -1 | 3  | 1266.48 | 12.05 |
| -3 | -1 | 3  | 1284.57 | 13.21 |
| -3 | -1 | 3  | 1274.00 | 12.83 |
| -3 | -1 | 4  | 3309.70 | 30.38 |
| -3 | -1 | 4  | 3206.47 | 30.50 |
| -3 | -1 | 4  | 3575.48 | 30.17 |
| -3 | -1 | 4  | 3690.36 | 30.21 |

## CIF 31

|    |    |   |         |       |
|----|----|---|---------|-------|
| -3 | -1 | 4 | 3458.34 | 30.61 |
| -3 | -1 | 4 | 3446.36 | 29.21 |
| -3 | -1 | 4 | 3061.21 | 30.31 |
| -3 | -1 | 4 | 3192.25 | 27.26 |
| -3 | -1 | 4 | 3343.49 | 30.50 |
| -3 | -1 | 4 | 3493.22 | 29.84 |
| -3 | -1 | 4 | 3624.40 | 30.30 |
| -3 | -1 | 5 | 417.80  | 6.75  |
| -3 | -1 | 5 | 445.65  | 6.00  |
| -3 | -1 | 5 | 453.61  | 6.60  |
| -3 | -1 | 5 | 504.25  | 6.84  |
| -3 | -1 | 5 | 415.84  | 6.57  |
| -3 | -1 | 5 | 472.13  | 6.61  |
| -3 | -1 | 5 | 465.81  | 6.49  |
| -3 | -1 | 5 | 437.40  | 6.76  |
| -3 | -1 | 5 | 506.48  | 7.21  |
| -3 | -1 | 5 | 446.45  | 4.74  |
| -3 | -1 | 5 | 483.85  | 7.00  |
| -3 | -1 | 5 | 483.18  | 6.16  |
| -3 | -1 | 5 | 463.07  | 6.27  |
| -3 | -1 | 6 | 247.57  | 4.66  |
| -3 | -1 | 6 | 306.95  | 5.34  |
| -3 | -1 | 6 | 316.62  | 5.12  |
| -3 | -1 | 6 | 257.47  | 5.21  |
| -3 | -1 | 6 | 253.97  | 4.78  |
| -3 | -1 | 6 | 295.91  | 4.83  |
| -3 | -1 | 6 | 271.41  | 5.27  |
| -3 | -1 | 6 | 263.32  | 5.27  |
| -3 | -1 | 6 | 235.46  | 3.45  |
| -3 | -1 | 6 | 303.02  | 4.43  |
| -3 | -1 | 6 | 252.19  | 4.23  |
| -3 | -1 | 7 | 482.99  | 8.50  |
| -3 | -1 | 7 | 540.39  | 8.04  |
| -3 | -1 | 7 | 579.75  | 8.55  |
| -3 | -1 | 7 | 563.46  | 8.75  |
| -3 | -1 | 7 | 570.19  | 8.16  |
| -3 | -1 | 7 | 692.07  | 9.18  |
| -3 | -1 | 7 | 667.29  | 9.41  |
| -3 | -1 | 7 | 587.13  | 6.86  |
| -3 | -1 | 7 | 646.84  | 8.44  |
| -3 | -1 | 8 | 110.24  | 3.53  |

## CIF 31

|    |    |    |         |       |
|----|----|----|---------|-------|
| -3 | -1 | 8  | 126.47  | 3.45  |
| -3 | -1 | 8  | 135.04  | 4.04  |
| -3 | -1 | 8  | 128.35  | 3.96  |
| -3 | -1 | 8  | 130.97  | 3.77  |
| -3 | -1 | 8  | 136.36  | 4.17  |
| -3 | -1 | 8  | 124.92  | 4.09  |
| -3 | -1 | 8  | 127.97  | 2.85  |
| -3 | -1 | 8  | 139.55  | 3.63  |
| -3 | -1 | 8  | 145.24  | 4.16  |
| -3 | -1 | 9  | 457.40  | 8.11  |
| -3 | -1 | 9  | 480.68  | 7.63  |
| -3 | -1 | 9  | 465.27  | 8.92  |
| -3 | -1 | 9  | 555.78  | 9.08  |
| -3 | -1 | 9  | 538.59  | 9.15  |
| -3 | -1 | 9  | 513.26  | 8.39  |
| -3 | -1 | 9  | 472.33  | 8.61  |
| -3 | -1 | 9  | 504.27  | 8.99  |
| -3 | -1 | 9  | 470.86  | 6.89  |
| -3 | -1 | 9  | 433.82  | 8.84  |
| -3 | -1 | 10 | 1441.72 | 18.98 |
| -3 | -1 | 10 | 1366.38 | 17.24 |
| -3 | -1 | 10 | 1416.09 | 18.20 |
| -3 | -1 | 10 | 1462.06 | 19.22 |
| -3 | -1 | 10 | 1425.89 | 17.94 |
| -3 | -1 | 10 | 1664.54 | 19.37 |
| -3 | -1 | 10 | 1640.60 | 18.39 |
| -3 | -1 | 10 | 1514.83 | 18.86 |
| -3 | -1 | 10 | 1326.54 | 16.01 |
| -3 | -1 | 11 | 1155.44 | 15.30 |
| -3 | -1 | 11 | 1009.98 | 14.79 |
| -3 | -1 | 11 | 1145.13 | 15.10 |
| -3 | -1 | 11 | 1064.87 | 16.03 |
| -3 | -1 | 11 | 1114.92 | 14.96 |
| -3 | -1 | 11 | 942.96  | 14.79 |
| -3 | -1 | 11 | 1024.91 | 15.67 |
| -3 | -1 | 11 | 984.60  | 15.01 |
| -3 | -1 | 12 | 3.04    | 1.16  |
| -3 | -1 | 12 | 4.90    | 1.43  |
| -3 | -1 | 12 | 2.77    | 1.06  |
| -3 | -1 | 12 | 4.93    | 1.11  |
| -3 | -1 | 12 | 2.75    | 1.04  |

## CIF 31

|    |    |     |        |      |
|----|----|-----|--------|------|
| -3 | -1 | 12  | 3.17   | 0.84 |
| -3 | -1 | 12  | 4.15   | 1.37 |
| -3 | -1 | 13  | 164.42 | 5.31 |
| -3 | -1 | 13  | 175.69 | 4.75 |
| -3 | -1 | 13  | 156.48 | 4.56 |
| -3 | -1 | 13  | 168.01 | 4.89 |
| -3 | -1 | 13  | 175.93 | 5.58 |
| -3 | -1 | 13  | 160.83 | 4.89 |
| -3 | -1 | 13  | 142.20 | 4.58 |
| -3 | -1 | 13  | 165.24 | 4.53 |
| -3 | -1 | 13  | 147.28 | 5.16 |
| -3 | -1 | 14  | 41.26  | 2.46 |
| -3 | -1 | 14  | 36.90  | 2.09 |
| -3 | -1 | 14  | 45.19  | 2.39 |
| -3 | -1 | 14  | 39.24  | 2.44 |
| -3 | -1 | 14  | 41.02  | 2.56 |
| -3 | -1 | 14  | 36.58  | 2.39 |
| -3 | -1 | 15  | 439.80 | 7.52 |
| -3 | -1 | 15  | 447.42 | 7.37 |
| -3 | -1 | 15  | 439.14 | 7.02 |
| -3 | -1 | 16  | 24.75  | 1.29 |
| -3 | -1 | 16  | 23.84  | 1.25 |
| -3 | 0  | -13 | 80.60  | 1.98 |
| -3 | 0  | -12 | 0.74   | 0.93 |
| -3 | 0  | -12 | 4.20   | 2.40 |
| -3 | 0  | -12 | 2.56   | 0.71 |
| -3 | 0  | -12 | 3.58   | 0.84 |
| -3 | 0  | -11 | 170.51 | 5.90 |
| -3 | 0  | -11 | 154.71 | 5.16 |
| -3 | 0  | -11 | 168.06 | 3.83 |
| -3 | 0  | -11 | 151.22 | 4.41 |
| -3 | 0  | -11 | 166.62 | 4.40 |
| -3 | 0  | -10 | 78.27  | 3.40 |
| -3 | 0  | -10 | 77.39  | 4.04 |
| -3 | 0  | -10 | 81.08  | 3.00 |
| -3 | 0  | -10 | 74.96  | 4.00 |
| -3 | 0  | -10 | 76.22  | 2.92 |
| -3 | 0  | -10 | 70.03  | 5.38 |
| -3 | 0  | -10 | 80.32  | 3.29 |
| -3 | 0  | -9  | 234.93 | 6.99 |
| -3 | 0  | -9  | 202.26 | 5.70 |

## CIF 31

|    |   |    |        |      |
|----|---|----|--------|------|
| -3 | 0 | -9 | 218.07 | 6.78 |
| -3 | 0 | -9 | 205.01 | 5.09 |
| -3 | 0 | -9 | 197.88 | 4.78 |
| -3 | 0 | -9 | 211.09 | 6.04 |
| -3 | 0 | -9 | 184.48 | 5.45 |
| -3 | 0 | -9 | 213.50 | 5.51 |
| -3 | 0 | -9 | 208.79 | 5.73 |
| -3 | 0 | -9 | 201.91 | 6.97 |
| -3 | 0 | -9 | 204.81 | 5.13 |
| -3 | 0 | -8 | 3.60   | 1.06 |
| -3 | 0 | -8 | 3.62   | 0.98 |
| -3 | 0 | -8 | 4.17   | 1.37 |
| -3 | 0 | -8 | 3.80   | 1.55 |
| -3 | 0 | -8 | 2.34   | 0.90 |
| -3 | 0 | -8 | 3.45   | 1.06 |
| -3 | 0 | -8 | 2.77   | 1.19 |
| -3 | 0 | -8 | 2.83   | 1.04 |
| -3 | 0 | -8 | 4.15   | 1.20 |
| -3 | 0 | -8 | 3.63   | 0.89 |
| -3 | 0 | -7 | 59.99  | 2.94 |
| -3 | 0 | -7 | 58.43  | 2.68 |
| -3 | 0 | -7 | 54.87  | 2.83 |
| -3 | 0 | -7 | 51.45  | 2.34 |
| -3 | 0 | -7 | 57.21  | 2.63 |
| -3 | 0 | -7 | 55.59  | 3.32 |
| -3 | 0 | -7 | 61.49  | 2.62 |
| -3 | 0 | -7 | 52.28  | 2.57 |
| -3 | 0 | -7 | 57.66  | 2.66 |
| -3 | 0 | -6 | 144.35 | 3.86 |
| -3 | 0 | -6 | 134.90 | 3.84 |
| -3 | 0 | -6 | 131.39 | 4.00 |
| -3 | 0 | -6 | 138.87 | 3.85 |
| -3 | 0 | -6 | 144.39 | 3.86 |
| -3 | 0 | -6 | 127.98 | 3.86 |
| -3 | 0 | -6 | 136.28 | 4.16 |
| -3 | 0 | -6 | 134.20 | 3.60 |
| -3 | 0 | -6 | 127.55 | 3.77 |
| -3 | 0 | -6 | 125.28 | 3.72 |
| -3 | 0 | -5 | 146.84 | 3.79 |
| -3 | 0 | -5 | 139.59 | 3.78 |
| -3 | 0 | -5 | 139.55 | 3.63 |

## CIF 31

|    |   |    |         |       |
|----|---|----|---------|-------|
| -3 | 0 | -5 | 145.45  | 3.66  |
| -3 | 0 | -5 | 154.13  | 3.79  |
| -3 | 0 | -5 | 144.26  | 3.59  |
| -3 | 0 | -5 | 141.95  | 3.90  |
| -3 | 0 | -5 | 139.14  | 3.50  |
| -3 | 0 | -5 | 139.97  | 3.61  |
| -3 | 0 | -4 | 1656.55 | 16.31 |
| -3 | 0 | -4 | 1876.39 | 20.09 |
| -3 | 0 | -3 | 3279.37 | 28.95 |
| -3 | 0 | -2 | 5261.79 | 44.84 |
| -3 | 0 | -1 | 88.39   | 2.06  |
| -3 | 0 | -1 | 84.18   | 1.19  |
| -3 | 0 | 0  | 1808.56 | 16.60 |
| -3 | 0 | 0  | 1851.73 | 16.68 |
| -3 | 0 | 0  | 1799.97 | 17.32 |
| -3 | 0 | 0  | 1844.83 | 16.81 |
| -3 | 0 | 1  | 1.42    | 0.45  |
| -3 | 0 | 1  | 1.74    | 0.36  |
| -3 | 0 | 1  | 1.31    | 0.43  |
| -3 | 0 | 1  | 1.59    | 0.51  |
| -3 | 0 | 1  | 2.08    | 0.48  |
| -3 | 0 | 1  | 1.84    | 0.51  |
| -3 | 0 | 2  | 924.39  | 9.09  |
| -3 | 0 | 2  | 895.18  | 9.16  |
| -3 | 0 | 2  | 861.30  | 8.96  |
| -3 | 0 | 2  | 878.13  | 8.56  |
| -3 | 0 | 2  | 818.78  | 7.51  |
| -3 | 0 | 2  | 832.69  | 9.40  |
| -3 | 0 | 2  | 822.02  | 9.58  |
| -3 | 0 | 3  | 66.19   | 1.82  |
| -3 | 0 | 3  | 58.99   | 1.76  |
| -3 | 0 | 3  | 64.42   | 1.64  |
| -3 | 0 | 3  | 65.01   | 1.99  |
| -3 | 0 | 3  | 63.21   | 1.79  |
| -3 | 0 | 3  | 64.33   | 1.25  |
| -3 | 0 | 3  | 69.46   | 1.99  |
| -3 | 0 | 3  | 68.42   | 2.03  |
| -3 | 0 | 4  | 784.23  | 9.52  |
| -3 | 0 | 4  | 883.60  | 9.80  |
| -3 | 0 | 4  | 819.22  | 8.84  |
| -3 | 0 | 4  | 788.62  | 9.15  |

## CIF 31

|    |   |   |         |       |
|----|---|---|---------|-------|
| -3 | 0 | 4 | 824.88  | 9.54  |
| -3 | 0 | 4 | 761.39  | 9.11  |
| -3 | 0 | 4 | 817.01  | 9.02  |
| -3 | 0 | 4 | 858.49  | 9.40  |
| -3 | 0 | 5 | 133.97  | 3.24  |
| -3 | 0 | 5 | 134.57  | 3.05  |
| -3 | 0 | 5 | 139.41  | 3.24  |
| -3 | 0 | 5 | 132.94  | 2.91  |
| -3 | 0 | 5 | 129.72  | 2.15  |
| -3 | 0 | 5 | 136.23  | 2.88  |
| -3 | 0 | 5 | 134.64  | 2.97  |
| -3 | 0 | 6 | 2053.69 | 21.38 |
| -3 | 0 | 6 | 1995.56 | 20.95 |
| -3 | 0 | 6 | 2047.98 | 20.77 |
| -3 | 0 | 6 | 2317.79 | 21.38 |
| -3 | 0 | 6 | 2027.18 | 18.97 |
| -3 | 0 | 6 | 2288.28 | 22.00 |
| -3 | 0 | 6 | 1913.25 | 20.19 |
| -3 | 0 | 6 | 2194.41 | 20.93 |
| -3 | 0 | 6 | 2123.60 | 21.74 |
| -3 | 0 | 6 | 2232.92 | 20.27 |
| -3 | 0 | 6 | 2082.72 | 20.16 |
| -3 | 0 | 7 | 90.35   | 2.54  |
| -3 | 0 | 7 | 102.89  | 3.16  |
| -3 | 0 | 7 | 110.73  | 3.14  |
| -3 | 0 | 7 | 105.53  | 3.06  |
| -3 | 0 | 7 | 95.36   | 3.19  |
| -3 | 0 | 7 | 107.42  | 3.55  |
| -3 | 0 | 7 | 104.25  | 3.22  |
| -3 | 0 | 7 | 108.35  | 3.07  |
| -3 | 0 | 7 | 110.76  | 3.60  |
| -3 | 0 | 7 | 92.73   | 2.31  |
| -3 | 0 | 8 | 0.14    | 0.71  |
| -3 | 0 | 8 | 2.55    | 0.78  |
| -3 | 0 | 8 | 0.68    | 0.67  |
| -3 | 0 | 8 | 0.81    | 0.60  |
| -3 | 0 | 8 | 3.40    | 0.94  |
| -3 | 0 | 8 | 1.02    | 0.92  |
| -3 | 0 | 8 | 1.68    | 0.50  |
| -3 | 0 | 8 | 0.48    | 0.47  |
| -3 | 0 | 9 | 437.69  | 7.66  |



## CIF 31

|    |   |    |        |       |
|----|---|----|--------|-------|
| -3 | 0 | 9  | 481.29 | 8.12  |
| -3 | 0 | 9  | 478.06 | 8.29  |
| -3 | 0 | 9  | 468.96 | 8.46  |
| -3 | 0 | 9  | 439.79 | 6.89  |
| -3 | 0 | 9  | 427.14 | 8.61  |
| -3 | 0 | 10 | 349.84 | 7.09  |
| -3 | 0 | 10 | 358.15 | 7.55  |
| -3 | 0 | 10 | 366.34 | 7.43  |
| -3 | 0 | 10 | 347.44 | 7.98  |
| -3 | 0 | 10 | 371.34 | 6.49  |
| -3 | 0 | 11 | 39.75  | 2.54  |
| -3 | 0 | 11 | 40.09  | 2.69  |
| -3 | 0 | 11 | 42.48  | 2.40  |
| -3 | 0 | 11 | 45.92  | 2.62  |
| -3 | 0 | 11 | 45.90  | 2.70  |
| -3 | 0 | 11 | 34.25  | 2.58  |
| -3 | 0 | 11 | 46.72  | 2.47  |
| -3 | 0 | 11 | 38.96  | 2.88  |
| -3 | 0 | 12 | 614.92 | 10.20 |
| -3 | 0 | 12 | 691.43 | 12.11 |
| -3 | 0 | 12 | 638.16 | 11.13 |
| -3 | 0 | 12 | 631.61 | 10.01 |
| -3 | 0 | 12 | 626.95 | 10.39 |
| -3 | 0 | 12 | 700.17 | 11.12 |
| -3 | 0 | 12 | 560.62 | 10.91 |
| -3 | 0 | 12 | 713.77 | 10.67 |
| -3 | 0 | 12 | 660.89 | 12.12 |
| -3 | 0 | 13 | 220.40 | 5.70  |
| -3 | 0 | 13 | 237.05 | 6.19  |
| -3 | 0 | 13 | 230.39 | 6.42  |
| -3 | 0 | 13 | 252.88 | 6.06  |
| -3 | 0 | 13 | 212.55 | 5.90  |
| -3 | 0 | 13 | 247.03 | 5.70  |
| -3 | 0 | 13 | 231.11 | 6.56  |
| -3 | 0 | 14 | 4.22   | 1.04  |
| -3 | 0 | 14 | 4.91   | 1.20  |
| -3 | 0 | 14 | 4.18   | 1.21  |
| -3 | 0 | 14 | 4.13   | 0.98  |
| -3 | 0 | 14 | 4.69   | 1.15  |
| -3 | 0 | 15 | 11.14  | 1.16  |
| -3 | 0 | 15 | 10.73  | 1.09  |

## CIF 31

|    |   |     |        |      |
|----|---|-----|--------|------|
| -3 | 0 | 15  | 10.49  | 1.19 |
| -3 | 1 | -13 | 1.88   | 3.45 |
| -3 | 1 | -13 | 1.97   | 1.70 |
| -3 | 1 | -13 | 0.98   | 1.24 |
| -3 | 1 | -13 | 0.80   | 0.54 |
| -3 | 1 | -12 | 169.93 | 5.25 |
| -3 | 1 | -12 | 155.54 | 4.19 |
| -3 | 1 | -12 | 172.29 | 4.86 |
| -3 | 1 | -12 | 209.20 | 6.82 |
| -3 | 1 | -12 | 198.75 | 4.66 |
| -3 | 1 | -12 | 214.31 | 4.55 |
| -3 | 1 | -11 | 16.92  | 1.66 |
| -3 | 1 | -11 | 16.30  | 1.97 |
| -3 | 1 | -11 | 17.17  | 1.64 |
| -3 | 1 | -11 | 17.55  | 2.12 |
| -3 | 1 | -10 | 2.55   | 0.96 |
| -3 | 1 | -10 | 5.24   | 5.89 |
| -3 | 1 | -10 | 1.41   | 1.23 |
| -3 | 1 | -10 | 0.71   | 0.69 |
| -3 | 1 | -10 | 2.40   | 1.04 |
| -3 | 1 | -10 | 0.09   | 0.80 |
| -3 | 1 | -10 | 3.69   | 4.46 |
| -3 | 1 | -9  | 182.36 | 6.00 |
| -3 | 1 | -9  | 205.44 | 6.58 |
| -3 | 1 | -9  | 192.62 | 5.58 |
| -3 | 1 | -9  | 189.48 | 4.70 |
| -3 | 1 | -9  | 189.82 | 5.38 |
| -3 | 1 | -9  | 182.30 | 5.03 |
| -3 | 1 | -9  | 185.50 | 4.90 |
| -3 | 1 | -8  | 9.57   | 1.34 |
| -3 | 1 | -8  | 12.41  | 1.80 |
| -3 | 1 | -8  | 10.60  | 1.63 |
| -3 | 1 | -8  | 9.12   | 1.13 |
| -3 | 1 | -8  | 10.41  | 1.35 |
| -3 | 1 | -8  | 10.43  | 1.35 |
| -3 | 1 | -8  | 9.68   | 1.47 |
| -3 | 1 | -8  | 9.66   | 1.20 |
| -3 | 1 | -8  | 10.27  | 1.54 |
| -3 | 1 | -8  | 9.95   | 1.17 |
| -3 | 1 | -7  | 5.70   | 1.21 |
| -3 | 1 | -7  | 5.62   | 1.04 |

## CIF 31

|    |   |    |         |       |
|----|---|----|---------|-------|
| -3 | 1 | -7 | 4.43    | 1.09  |
| -3 | 1 | -7 | 4.71    | 0.99  |
| -3 | 1 | -7 | 3.96    | 1.15  |
| -3 | 1 | -7 | 3.75    | 0.86  |
| -3 | 1 | -7 | 5.14    | 0.92  |
| -3 | 1 | -7 | 3.10    | 1.25  |
| -3 | 1 | -7 | 4.87    | 1.00  |
| -3 | 1 | -7 | 3.33    | 0.90  |
| -3 | 1 | -7 | 4.66    | 1.08  |
| -3 | 1 | -7 | 4.21    | 0.86  |
| -3 | 1 | -6 | 322.11  | 5.65  |
| -3 | 1 | -6 | 305.44  | 5.89  |
| -3 | 1 | -6 | 306.50  | 6.14  |
| -3 | 1 | -6 | 316.80  | 7.27  |
| -3 | 1 | -6 | 301.37  | 5.50  |
| -3 | 1 | -6 | 294.69  | 5.91  |
| -3 | 1 | -6 | 283.27  | 5.71  |
| -3 | 1 | -6 | 317.32  | 6.38  |
| -3 | 1 | -6 | 307.88  | 5.75  |
| -3 | 1 | -6 | 292.80  | 5.49  |
| -3 | 1 | -6 | 290.09  | 5.96  |
| -3 | 1 | -6 | 290.39  | 5.89  |
| -3 | 1 | -5 | 718.14  | 9.36  |
| -3 | 1 | -5 | 646.53  | 9.25  |
| -3 | 1 | -5 | 701.11  | 9.24  |
| -3 | 1 | -5 | 696.04  | 10.76 |
| -3 | 1 | -5 | 646.85  | 8.98  |
| -3 | 1 | -5 | 694.39  | 9.01  |
| -3 | 1 | -5 | 676.80  | 9.06  |
| -3 | 1 | -4 | 698.64  | 9.63  |
| -3 | 1 | -4 | 637.45  | 6.94  |
| -3 | 1 | -3 | 727.98  | 7.32  |
| -3 | 1 | -2 | 583.09  | 5.90  |
| -3 | 1 | -1 | 445.89  | 4.66  |
| -3 | 1 | -1 | 432.95  | 5.43  |
| -3 | 1 | 0  | 2618.59 | 22.34 |
| -3 | 1 | 0  | 2528.52 | 23.28 |
| -3 | 1 | 0  | 2663.12 | 23.40 |
| -3 | 1 | 0  | 2577.11 | 23.06 |
| -3 | 1 | 0  | 2682.97 | 24.66 |
| -3 | 1 | 0  | 2686.42 | 23.41 |

## CIF 31

|    |   |   |         |       |
|----|---|---|---------|-------|
| -3 | 1 | 0 | 2727.14 | 22.73 |
| -3 | 1 | 0 | 2562.63 | 24.28 |
| -3 | 1 | 2 | 42.00   | 1.30  |
| -3 | 1 | 2 | 38.86   | 1.29  |
| -3 | 1 | 2 | 37.52   | 1.51  |
| -3 | 1 | 2 | 40.93   | 1.45  |
| -3 | 1 | 2 | 40.03   | 1.01  |
| -3 | 1 | 2 | 41.51   | 1.34  |
| -3 | 1 | 2 | 42.74   | 1.61  |
| -3 | 1 | 3 | 287.16  | 4.23  |
| -3 | 1 | 3 | 314.35  | 4.54  |
| -3 | 1 | 3 | 297.57  | 4.22  |
| -3 | 1 | 3 | 312.57  | 4.70  |
| -3 | 1 | 3 | 325.35  | 4.82  |
| -3 | 1 | 3 | 286.09  | 3.70  |
| -3 | 1 | 3 | 312.51  | 4.20  |
| -3 | 1 | 3 | 311.73  | 4.78  |
| -3 | 1 | 4 | 3979.59 | 34.66 |
| -3 | 1 | 4 | 3677.49 | 33.87 |
| -3 | 1 | 4 | 4039.66 | 35.03 |
| -3 | 1 | 4 | 4098.62 | 34.23 |
| -3 | 1 | 4 | 3935.44 | 33.95 |
| -3 | 1 | 4 | 3874.41 | 33.18 |
| -3 | 1 | 4 | 4044.86 | 35.09 |
| -3 | 1 | 4 | 3568.82 | 33.22 |
| -3 | 1 | 4 | 3979.90 | 34.54 |
| -3 | 1 | 4 | 3804.05 | 34.07 |
| -3 | 1 | 5 | 424.77  | 6.61  |
| -3 | 1 | 5 | 435.63  | 6.02  |
| -3 | 1 | 5 | 436.73  | 6.63  |
| -3 | 1 | 5 | 463.95  | 6.28  |
| -3 | 1 | 5 | 426.40  | 5.87  |
| -3 | 1 | 5 | 424.37  | 6.00  |
| -3 | 1 | 5 | 380.76  | 6.50  |
| -3 | 1 | 5 | 430.79  | 6.62  |
| -3 | 1 | 5 | 424.36  | 5.44  |
| -3 | 1 | 5 | 480.29  | 6.46  |
| -3 | 1 | 6 | 47.01   | 2.13  |
| -3 | 1 | 6 | 46.50   | 1.84  |
| -3 | 1 | 6 | 44.07   | 1.51  |
| -3 | 1 | 6 | 52.10   | 1.99  |

## CIF 31

|    |   |    |         |       |
|----|---|----|---------|-------|
| -3 | 1 | 6  | 48.63   | 2.12  |
| -3 | 1 | 6  | 43.02   | 1.47  |
| -3 | 1 | 6  | 40.83   | 1.77  |
| -3 | 1 | 7  | 1.38    | 0.72  |
| -3 | 1 | 7  | 1.52    | 0.70  |
| -3 | 1 | 7  | 1.30    | 0.56  |
| -3 | 1 | 7  | 2.44    | 0.81  |
| -3 | 1 | 7  | 0.60    | 0.44  |
| -3 | 1 | 7  | 0.94    | 0.41  |
| -3 | 1 | 7  | 1.44    | 0.63  |
| -3 | 1 | 8  | 87.43   | 3.62  |
| -3 | 1 | 8  | 89.92   | 3.35  |
| -3 | 1 | 8  | 97.22   | 3.07  |
| -3 | 1 | 8  | 97.06   | 3.31  |
| -3 | 1 | 8  | 92.85   | 3.14  |
| -3 | 1 | 8  | 106.40  | 3.44  |
| -3 | 1 | 8  | 86.13   | 3.61  |
| -3 | 1 | 8  | 86.75   | 2.65  |
| -3 | 1 | 9  | 111.12  | 3.87  |
| -3 | 1 | 9  | 124.49  | 3.71  |
| -3 | 1 | 9  | 107.21  | 3.84  |
| -3 | 1 | 9  | 97.66   | 3.46  |
| -3 | 1 | 9  | 117.08  | 3.72  |
| -3 | 1 | 9  | 96.82   | 4.19  |
| -3 | 1 | 9  | 112.02  | 3.83  |
| -3 | 1 | 9  | 121.42  | 3.73  |
| -3 | 1 | 9  | 86.70   | 3.97  |
| -3 | 1 | 10 | 28.88   | 2.32  |
| -3 | 1 | 10 | 29.86   | 2.12  |
| -3 | 1 | 10 | 35.26   | 2.04  |
| -3 | 1 | 10 | 33.10   | 2.10  |
| -3 | 1 | 10 | 37.62   | 2.38  |
| -3 | 1 | 10 | 23.17   | 1.94  |
| -3 | 1 | 10 | 26.71   | 2.37  |
| -3 | 1 | 10 | 35.79   | 2.12  |
| -3 | 1 | 11 | 1401.44 | 17.04 |
| -3 | 1 | 11 | 1497.38 | 18.01 |
| -3 | 1 | 11 | 1539.85 | 20.50 |
| -3 | 1 | 11 | 1574.35 | 18.84 |
| -3 | 1 | 11 | 1410.63 | 18.96 |
| -3 | 1 | 11 | 1611.26 | 18.58 |

## CIF 31

|    |   |     |        |      |
|----|---|-----|--------|------|
| -3 | 1 | 12  | 49.83  | 2.82 |
| -3 | 1 | 12  | 50.11  | 3.07 |
| -3 | 1 | 12  | 52.68  | 2.68 |
| -3 | 1 | 12  | 46.45  | 3.16 |
| -3 | 1 | 13  | 382.55 | 7.85 |
| -3 | 1 | 13  | 375.95 | 7.44 |
| -3 | 1 | 13  | 396.05 | 8.47 |
| -3 | 1 | 13  | 363.00 | 7.98 |
| -3 | 1 | 13  | 403.93 | 7.50 |
| -3 | 1 | 13  | 382.15 | 8.55 |
| -3 | 1 | 14  | 44.46  | 2.38 |
| -3 | 1 | 14  | 49.78  | 2.69 |
| -3 | 1 | 14  | 41.33  | 2.07 |
| -3 | 1 | 14  | 47.63  | 2.56 |
| -3 | 1 | 14  | 48.22  | 2.63 |
| -3 | 1 | 15  | 287.85 | 5.27 |
| -3 | 1 | 15  | 278.55 | 4.94 |
| -3 | 2 | -13 | 238.71 | 5.84 |
| -3 | 2 | -13 | 232.71 | 4.47 |
| -3 | 2 | -13 | 232.45 | 4.12 |
| -3 | 2 | -12 | 104.46 | 3.56 |
| -3 | 2 | -12 | 108.71 | 4.22 |
| -3 | 2 | -12 | 105.43 | 4.90 |
| -3 | 2 | -12 | 99.30  | 3.42 |
| -3 | 2 | -12 | 98.71  | 3.17 |
| -3 | 2 | -12 | 97.32  | 3.67 |
| -3 | 2 | -11 | 25.48  | 2.40 |
| -3 | 2 | -11 | 24.83  | 2.01 |
| -3 | 2 | -11 | 27.12  | 2.48 |
| -3 | 2 | -11 | 30.28  | 2.01 |
| -3 | 2 | -10 | 142.32 | 4.34 |
| -3 | 2 | -10 | 127.13 | 4.49 |
| -3 | 2 | -10 | 134.88 | 5.79 |
| -3 | 2 | -10 | 136.38 | 5.23 |
| -3 | 2 | -10 | 126.76 | 4.62 |
| -3 | 2 | -10 | 131.44 | 3.83 |
| -3 | 2 | -10 | 133.97 | 4.04 |
| -3 | 2 | -10 | 134.28 | 6.94 |
| -3 | 2 | -9  | 181.95 | 5.61 |
| -3 | 2 | -9  | 187.72 | 5.46 |
| -3 | 2 | -9  | 182.00 | 4.54 |

## CIF 31

|    |   |    |         |       |
|----|---|----|---------|-------|
| -3 | 2 | -9 | 184.55  | 4.53  |
| -3 | 2 | -9 | 191.19  | 5.06  |
| -3 | 2 | -9 | 188.81  | 5.46  |
| -3 | 2 | -9 | 182.89  | 4.56  |
| -3 | 2 | -9 | 183.87  | 4.88  |
| -3 | 2 | -9 | 181.99  | 6.03  |
| -3 | 2 | -8 | 1.32    | 0.90  |
| -3 | 2 | -8 | 1.25    | 0.80  |
| -3 | 2 | -8 | 1.00    | 0.90  |
| -3 | 2 | -8 | 1.09    | 1.09  |
| -3 | 2 | -8 | 0.85    | 1.22  |
| -3 | 2 | -8 | 0.37    | 0.75  |
| -3 | 2 | -8 | 1.72    | 0.80  |
| -3 | 2 | -8 | 2.45    | 0.92  |
| -3 | 2 | -8 | 1.12    | 0.68  |
| -3 | 2 | -8 | 1.12    | 1.02  |
| -3 | 2 | -7 | 68.35   | 2.65  |
| -3 | 2 | -7 | 74.76   | 3.04  |
| -3 | 2 | -7 | 67.31   | 2.78  |
| -3 | 2 | -7 | 76.84   | 3.67  |
| -3 | 2 | -7 | 67.97   | 2.61  |
| -3 | 2 | -7 | 67.52   | 2.98  |
| -3 | 2 | -7 | 73.69   | 3.03  |
| -3 | 2 | -7 | 72.98   | 2.85  |
| -3 | 2 | -6 | 51.97   | 2.29  |
| -3 | 2 | -6 | 54.49   | 2.78  |
| -3 | 2 | -6 | 45.42   | 2.12  |
| -3 | 2 | -6 | 57.54   | 2.42  |
| -3 | 2 | -6 | 44.05   | 1.75  |
| -3 | 2 | -6 | 47.73   | 2.09  |
| -3 | 2 | -6 | 48.91   | 2.35  |
| -3 | 2 | -6 | 41.01   | 2.11  |
| -3 | 2 | -6 | 58.89   | 3.04  |
| -3 | 2 | -5 | 22.04   | 1.84  |
| -3 | 2 | -5 | 23.79   | 1.73  |
| -3 | 2 | -5 | 24.56   | 1.20  |
| -3 | 2 | -4 | 1532.21 | 14.73 |
| -3 | 2 | -3 | 7.68    | 0.63  |
| -3 | 2 | -2 | 2929.55 | 27.26 |
| -3 | 2 | -2 | 2908.12 | 26.70 |
| -3 | 2 | -1 | 66.18   | 1.60  |

## CIF 31

|    |   |    |         |       |
|----|---|----|---------|-------|
| -3 | 2 | -1 | 67.00   | 1.78  |
| -3 | 2 | -1 | 65.50   | 1.48  |
| -3 | 2 | -1 | 69.01   | 2.19  |
| -3 | 2 | -1 | 66.51   | 1.89  |
| -3 | 2 | -1 | 69.73   | 2.24  |
| -3 | 2 | -1 | 71.47   | 1.49  |
| -3 | 2 | -1 | 69.96   | 2.05  |
| -3 | 2 | 0  | 3443.83 | 29.91 |
| -3 | 2 | 0  | 3348.17 | 28.52 |
| -3 | 2 | 0  | 3529.36 | 31.01 |
| -3 | 2 | 0  | 3622.82 | 30.52 |
| -3 | 2 | 0  | 3420.24 | 29.39 |
| -3 | 2 | 0  | 3187.06 | 30.89 |
| -3 | 2 | 0  | 3578.14 | 29.42 |
| -3 | 2 | 0  | 3478.91 | 30.75 |
| -3 | 2 | 1  | 82.67   | 1.94  |
| -3 | 2 | 1  | 82.95   | 1.92  |
| -3 | 2 | 1  | 84.61   | 1.72  |
| -3 | 2 | 1  | 96.34   | 2.01  |
| -3 | 2 | 1  | 82.99   | 1.32  |
| -3 | 2 | 1  | 93.50   | 2.40  |
| -3 | 2 | 1  | 95.26   | 2.39  |
| -3 | 2 | 2  | 9854.40 | 82.69 |
| -3 | 2 | 2  | 9999.00 | 83.79 |
| -3 | 2 | 2  | 9728.08 | 83.30 |
| -3 | 2 | 3  | 1656.93 | 15.86 |
| -3 | 2 | 3  | 1714.58 | 15.85 |
| -3 | 2 | 3  | 1724.66 | 16.19 |
| -3 | 2 | 3  | 1559.50 | 16.47 |
| -3 | 2 | 3  | 1693.38 | 16.30 |
| -3 | 2 | 3  | 1649.07 | 16.61 |
| -3 | 2 | 3  | 1627.22 | 15.46 |
| -3 | 2 | 3  | 1781.14 | 16.95 |
| -3 | 2 | 4  | 541.75  | 7.74  |
| -3 | 2 | 4  | 571.22  | 6.75  |
| -3 | 2 | 4  | 577.41  | 7.86  |
| -3 | 2 | 4  | 587.59  | 6.96  |
| -3 | 2 | 4  | 512.14  | 5.92  |
| -3 | 2 | 4  | 526.77  | 7.39  |
| -3 | 2 | 4  | 567.40  | 7.34  |
| -3 | 2 | 4  | 497.71  | 6.67  |



## CIF 31

|    |   |   |         |       |
|----|---|---|---------|-------|
| -3 | 2 | 4 | 584.26  | 7.84  |
| -3 | 2 | 4 | 568.65  | 6.68  |
| -3 | 2 | 5 | 236.31  | 4.94  |
| -3 | 2 | 5 | 251.36  | 4.11  |
| -3 | 2 | 5 | 225.77  | 4.06  |
| -3 | 2 | 5 | 249.53  | 5.03  |
| -3 | 2 | 5 | 230.83  | 4.22  |
| -3 | 2 | 5 | 228.86  | 4.30  |
| -3 | 2 | 5 | 253.87  | 4.00  |
| -3 | 2 | 5 | 226.27  | 4.99  |
| -3 | 2 | 5 | 243.96  | 4.11  |
| -3 | 2 | 5 | 228.82  | 3.22  |
| -3 | 2 | 5 | 241.98  | 4.66  |
| -3 | 2 | 6 | 1559.82 | 17.13 |
| -3 | 2 | 6 | 1682.76 | 16.74 |
| -3 | 2 | 6 | 1620.64 | 18.57 |
| -3 | 2 | 6 | 1678.19 | 18.46 |
| -3 | 2 | 6 | 1637.53 | 16.87 |
| -3 | 2 | 6 | 1576.26 | 18.53 |
| -3 | 2 | 6 | 1660.24 | 17.03 |
| -3 | 2 | 6 | 1768.04 | 17.07 |
| -3 | 2 | 6 | 1773.89 | 18.14 |
| -3 | 2 | 7 | 74.02   | 3.08  |
| -3 | 2 | 7 | 72.30   | 2.37  |
| -3 | 2 | 7 | 85.86   | 3.23  |
| -3 | 2 | 7 | 76.99   | 2.55  |
| -3 | 2 | 7 | 86.08   | 2.85  |
| -3 | 2 | 7 | 77.10   | 2.64  |
| -3 | 2 | 7 | 77.57   | 2.83  |
| -3 | 2 | 8 | 176.69  | 5.03  |
| -3 | 2 | 8 | 165.80  | 3.93  |
| -3 | 2 | 8 | 174.52  | 4.91  |
| -3 | 2 | 8 | 199.74  | 4.46  |
| -3 | 2 | 8 | 190.68  | 4.68  |
| -3 | 2 | 8 | 207.34  | 4.67  |
| -3 | 2 | 8 | 165.97  | 4.38  |
| -3 | 2 | 9 | 53.68   | 2.98  |
| -3 | 2 | 9 | 53.43   | 2.23  |
| -3 | 2 | 9 | 53.25   | 2.44  |
| -3 | 2 | 9 | 59.48   | 2.85  |
| -3 | 2 | 9 | 52.04   | 2.79  |

## CIF 31

|    |   |     |        |      |
|----|---|-----|--------|------|
| -3 | 2 | 9   | 51.97  | 3.16 |
| -3 | 2 | 10  | 236.20 | 6.48 |
| -3 | 2 | 10  | 252.66 | 7.22 |
| -3 | 2 | 10  | 254.13 | 6.58 |
| -3 | 2 | 10  | 251.69 | 6.24 |
| -3 | 2 | 10  | 257.29 | 5.56 |
| -3 | 2 | 10  | 315.20 | 6.74 |
| -3 | 2 | 10  | 255.70 | 7.31 |
| -3 | 2 | 10  | 307.09 | 6.52 |
| -3 | 2 | 11  | 2.79   | 1.24 |
| -3 | 2 | 11  | 2.67   | 1.04 |
| -3 | 2 | 11  | 1.46   | 1.02 |
| -3 | 2 | 11  | 2.42   | 0.89 |
| -3 | 2 | 11  | 3.07   | 0.93 |
| -3 | 2 | 11  | 1.81   | 1.23 |
| -3 | 2 | 11  | 2.25   | 1.51 |
| -3 | 2 | 12  | 87.78  | 3.83 |
| -3 | 2 | 12  | 89.39  | 3.52 |
| -3 | 2 | 12  | 80.98  | 3.91 |
| -3 | 2 | 12  | 89.22  | 3.46 |
| -3 | 2 | 13  | 2.25   | 0.80 |
| -3 | 2 | 13  | 1.39   | 1.09 |
| -3 | 2 | 13  | 3.22   | 1.14 |
| -3 | 2 | 13  | 0.88   | 0.81 |
| -3 | 2 | 13  | 1.71   | 1.01 |
| -3 | 2 | 14  | 50.28  | 2.42 |
| -3 | 2 | 14  | 49.23  | 2.47 |
| -3 | 2 | 14  | 45.74  | 2.10 |
| -3 | 2 | 15  | 5.51   | 0.74 |
| -3 | 3 | -14 | 1.31   | 1.68 |
| -3 | 3 | -14 | 2.56   | 0.88 |
| -3 | 3 | -13 | 0.69   | 0.62 |
| -3 | 3 | -13 | 0.49   | 0.90 |
| -3 | 3 | -13 | 1.83   | 0.65 |
| -3 | 3 | -13 | 0.75   | 0.75 |
| -3 | 3 | -13 | 1.46   | 3.31 |
| -3 | 3 | -12 | 53.81  | 2.70 |
| -3 | 3 | -12 | 58.17  | 2.40 |
| -3 | 3 | -12 | 60.65  | 3.15 |
| -3 | 3 | -11 | 23.98  | 2.23 |
| -3 | 3 | -11 | 29.77  | 1.82 |

## CIF 31

|    |   |     |        |       |
|----|---|-----|--------|-------|
| -3 | 3 | -11 | 32.82  | 2.39  |
| -3 | 3 | -11 | 34.87  | 2.10  |
| -3 | 3 | -11 | 29.02  | 2.23  |
| -3 | 3 | -11 | 29.97  | 6.45  |
| -3 | 3 | -10 | 670.66 | 10.30 |
| -3 | 3 | -10 | 621.44 | 9.90  |
| -3 | 3 | -10 | 676.60 | 11.57 |
| -3 | 3 | -10 | 693.37 | 11.92 |
| -3 | 3 | -10 | 728.91 | 12.49 |
| -3 | 3 | -10 | 656.36 | 11.30 |
| -3 | 3 | -10 | 675.81 | 10.00 |
| -3 | 3 | -10 | 706.79 | 12.36 |
| -3 | 3 | -9  | 422.16 | 8.62  |
| -3 | 3 | -9  | 429.15 | 7.65  |
| -3 | 3 | -9  | 354.60 | 7.55  |
| -3 | 3 | -9  | 424.56 | 7.40  |
| -3 | 3 | -9  | 421.41 | 9.24  |
| -3 | 3 | -9  | 445.57 | 8.77  |
| -3 | 3 | -9  | 403.23 | 8.45  |
| -3 | 3 | -9  | 429.05 | 7.71  |
| -3 | 3 | -9  | 406.81 | 8.48  |
| -3 | 3 | -9  | 380.40 | 7.13  |
| -3 | 3 | -9  | 399.63 | 8.22  |
| -3 | 3 | -9  | 433.81 | 7.84  |
| -3 | 3 | -8  | 350.77 | 6.48  |
| -3 | 3 | -8  | 373.88 | 8.42  |
| -3 | 3 | -8  | 377.67 | 7.64  |
| -3 | 3 | -8  | 373.96 | 6.99  |
| -3 | 3 | -8  | 368.50 | 7.56  |
| -3 | 3 | -8  | 357.35 | 7.06  |
| -3 | 3 | -8  | 354.27 | 7.50  |
| -3 | 3 | -8  | 344.62 | 8.24  |
| -3 | 3 | -8  | 370.03 | 7.13  |
| -3 | 3 | -8  | 362.02 | 6.77  |
| -3 | 3 | -7  | 159.69 | 4.61  |
| -3 | 3 | -7  | 152.91 | 4.46  |
| -3 | 3 | -7  | 187.36 | 5.48  |
| -3 | 3 | -7  | 157.90 | 4.23  |
| -3 | 3 | -7  | 153.34 | 4.40  |
| -3 | 3 | -7  | 177.84 | 5.34  |
| -3 | 3 | -7  | 180.57 | 6.08  |

## CIF 31

|    |   |    |         |       |
|----|---|----|---------|-------|
| -3 | 3 | -7 | 161.64  | 4.23  |
| -3 | 3 | -7 | 185.94  | 4.85  |
| -3 | 3 | -7 | 136.34  | 3.67  |
| -3 | 3 | -7 | 167.54  | 4.21  |
| -3 | 3 | -7 | 170.00  | 4.00  |
| -3 | 3 | -7 | 168.04  | 4.38  |
| -3 | 3 | -6 | 38.04   | 2.72  |
| -3 | 3 | -6 | 46.98   | 2.24  |
| -3 | 3 | -6 | 43.58   | 2.05  |
| -3 | 3 | -6 | 44.23   | 2.49  |
| -3 | 3 | -6 | 38.92   | 2.46  |
| -3 | 3 | -6 | 41.10   | 2.48  |
| -3 | 3 | -6 | 44.65   | 2.13  |
| -3 | 3 | -6 | 40.94   | 2.55  |
| -3 | 3 | -6 | 40.86   | 1.80  |
| -3 | 3 | -6 | 41.18   | 2.11  |
| -3 | 3 | -6 | 46.70   | 2.66  |
| -3 | 3 | -6 | 42.11   | 2.12  |
| -3 | 3 | -6 | 46.81   | 2.12  |
| -3 | 3 | -6 | 44.74   | 2.28  |
| -3 | 3 | -5 | 196.32  | 4.88  |
| -3 | 3 | -5 | 183.91  | 5.14  |
| -3 | 3 | -5 | 181.27  | 4.84  |
| -3 | 3 | -5 | 192.14  | 5.08  |
| -3 | 3 | -5 | 192.08  | 3.81  |
| -3 | 3 | -5 | 195.55  | 5.23  |
| -3 | 3 | -5 | 183.82  | 5.43  |
| -3 | 3 | -4 | 2766.13 | 26.10 |
| -3 | 3 | -4 | 3005.03 | 26.29 |
| -3 | 3 | -3 | 5.39    | 0.66  |
| -3 | 3 | -3 | 3.76    | 0.73  |
| -3 | 3 | -3 | 4.42    | 0.85  |
| -3 | 3 | -3 | 4.65    | 0.70  |
| -3 | 3 | -2 | 2611.47 | 23.52 |
| -3 | 3 | -2 | 2661.38 | 25.05 |
| -3 | 3 | -2 | 2584.67 | 23.60 |
| -3 | 3 | -2 | 2673.12 | 24.66 |
| -3 | 3 | -2 | 2791.38 | 25.59 |
| -3 | 3 | -2 | 2725.66 | 24.56 |
| -3 | 3 | -1 | 1694.18 | 15.40 |
| -3 | 3 | -1 | 1722.71 | 16.98 |

## CIF 31

|    |   |    |         |       |
|----|---|----|---------|-------|
| -3 | 3 | -1 | 1839.89 | 17.34 |
| -3 | 3 | -1 | 1708.15 | 15.76 |
| -3 | 3 | -1 | 1708.52 | 16.12 |
| -3 | 3 | -1 | 1759.23 | 17.36 |
| -3 | 3 | -1 | 1809.64 | 16.88 |
| -3 | 3 | 0  | 266.21  | 3.48  |
| -3 | 3 | 0  | 327.02  | 5.08  |
| -3 | 3 | 0  | 318.50  | 4.99  |
| -3 | 3 | 0  | 274.40  | 4.67  |
| -3 | 3 | 0  | 300.72  | 4.11  |
| -3 | 3 | 0  | 313.12  | 3.60  |
| -3 | 3 | 0  | 313.15  | 4.78  |
| -3 | 3 | 1  | 827.10  | 8.40  |
| -3 | 3 | 1  | 760.16  | 8.26  |
| -3 | 3 | 1  | 748.29  | 7.67  |
| -3 | 3 | 1  | 798.57  | 8.45  |
| -3 | 3 | 1  | 792.82  | 8.33  |
| -3 | 3 | 1  | 818.81  | 9.42  |
| -3 | 3 | 1  | 741.91  | 6.99  |
| -3 | 3 | 1  | 794.74  | 9.28  |
| -3 | 3 | 2  | 100.54  | 2.65  |
| -3 | 3 | 2  | 98.83   | 1.92  |
| -3 | 3 | 2  | 108.61  | 2.29  |
| -3 | 3 | 2  | 97.73   | 2.73  |
| -3 | 3 | 2  | 97.13   | 2.26  |
| -3 | 3 | 2  | 109.63  | 2.72  |
| -3 | 3 | 2  | 101.05  | 2.17  |
| -3 | 3 | 2  | 99.79   | 2.75  |
| -3 | 3 | 2  | 92.61   | 2.36  |
| -3 | 3 | 2  | 99.11   | 2.20  |
| -3 | 3 | 2  | 89.66   | 2.62  |
| -3 | 3 | 3  | 816.00  | 9.56  |
| -3 | 3 | 3  | 732.97  | 9.71  |
| -3 | 3 | 3  | 740.30  | 9.01  |
| -3 | 3 | 3  | 733.47  | 8.22  |
| -3 | 3 | 3  | 833.66  | 8.21  |
| -3 | 3 | 3  | 737.68  | 8.36  |
| -3 | 3 | 3  | 765.77  | 8.68  |
| -3 | 3 | 3  | 790.95  | 9.31  |
| -3 | 3 | 3  | 783.16  | 9.63  |
| -3 | 3 | 3  | 745.64  | 8.53  |

## CIF 31

|    |   |   |        |      |
|----|---|---|--------|------|
| -3 | 3 | 3 | 691.00 | 9.54 |
| -3 | 3 | 4 | 468.90 | 5.94 |
| -3 | 3 | 4 | 467.11 | 7.50 |
| -3 | 3 | 4 | 537.31 | 6.72 |
| -3 | 3 | 4 | 455.78 | 6.40 |
| -3 | 3 | 4 | 517.78 | 7.36 |
| -3 | 3 | 4 | 463.95 | 6.64 |
| -3 | 3 | 4 | 431.75 | 6.35 |
| -3 | 3 | 4 | 478.41 | 6.14 |
| -3 | 3 | 4 | 478.06 | 7.43 |
| -3 | 3 | 5 | 87.71  | 3.11 |
| -3 | 3 | 5 | 84.21  | 2.79 |
| -3 | 3 | 5 | 85.30  | 2.18 |
| -3 | 3 | 5 | 90.27  | 3.06 |
| -3 | 3 | 5 | 88.39  | 2.34 |
| -3 | 3 | 5 | 79.40  | 2.22 |
| -3 | 3 | 5 | 84.21  | 2.53 |
| -3 | 3 | 5 | 93.03  | 2.91 |
| -3 | 3 | 5 | 88.99  | 2.53 |
| -3 | 3 | 5 | 99.10  | 2.64 |
| -3 | 3 | 6 | 10.10  | 1.25 |
| -3 | 3 | 6 | 10.29  | 1.23 |
| -3 | 3 | 6 | 12.81  | 0.93 |
| -3 | 3 | 6 | 10.34  | 0.91 |
| -3 | 3 | 6 | 11.06  | 1.15 |
| -3 | 3 | 6 | 14.72  | 1.30 |
| -3 | 3 | 6 | 12.96  | 1.17 |
| -3 | 3 | 6 | 11.85  | 1.40 |
| -3 | 3 | 6 | 11.09  | 1.44 |
| -3 | 3 | 6 | 12.39  | 1.13 |
| -3 | 3 | 6 | 11.39  | 1.23 |
| -3 | 3 | 7 | 75.83  | 2.81 |
| -3 | 3 | 7 | 70.58  | 2.93 |
| -3 | 3 | 7 | 71.56  | 2.19 |
| -3 | 3 | 7 | 75.06  | 3.30 |
| -3 | 3 | 7 | 69.99  | 2.34 |
| -3 | 3 | 7 | 63.02  | 2.53 |
| -3 | 3 | 7 | 72.78  | 3.43 |
| -3 | 3 | 7 | 77.11  | 2.78 |
| -3 | 3 | 7 | 69.91  | 2.85 |
| -3 | 3 | 7 | 68.70  | 2.97 |

## CIF 31

|    |   |     |        |       |
|----|---|-----|--------|-------|
| -3 | 3 | 8   | 678.32 | 11.34 |
| -3 | 3 | 8   | 665.39 | 11.59 |
| -3 | 3 | 8   | 706.68 | 10.31 |
| -3 | 3 | 8   | 688.37 | 10.81 |
| -3 | 3 | 9   | 2.71   | 0.92  |
| -3 | 3 | 9   | 4.85   | 1.37  |
| -3 | 3 | 9   | 4.31   | 1.22  |
| -3 | 3 | 9   | 2.22   | 0.87  |
| -3 | 3 | 9   | 4.92   | 1.05  |
| -3 | 3 | 10  | 119.47 | 4.69  |
| -3 | 3 | 10  | 114.63 | 4.46  |
| -3 | 3 | 10  | 122.99 | 4.12  |
| -3 | 3 | 10  | 126.23 | 4.24  |
| -3 | 3 | 11  | 462.28 | 9.33  |
| -3 | 3 | 11  | 463.73 | 9.47  |
| -3 | 3 | 11  | 490.34 | 8.55  |
| -3 | 3 | 11  | 423.40 | 9.76  |
| -3 | 3 | 11  | 469.52 | 10.24 |
| -3 | 3 | 11  | 432.68 | 8.43  |
| -3 | 3 | 12  | 693.50 | 11.22 |
| -3 | 3 | 12  | 795.84 | 11.03 |
| -3 | 3 | 12  | 666.34 | 10.81 |
| -3 | 3 | 12  | 755.07 | 10.69 |
| -3 | 3 | 12  | 761.24 | 12.38 |
| -3 | 3 | 12  | 758.93 | 12.84 |
| -3 | 3 | 12  | 739.11 | 12.86 |
| -3 | 3 | 13  | 98.87  | 3.61  |
| -3 | 3 | 13  | 93.25  | 3.38  |
| -3 | 3 | 13  | 99.71  | 3.82  |
| -3 | 3 | 14  | 20.20  | 1.50  |
| -3 | 3 | 14  | 16.32  | 1.18  |
| -3 | 3 | 14  | 20.11  | 1.49  |
| -3 | 4 | -14 | 54.08  | 2.16  |
| -3 | 4 | -14 | 62.37  | 1.79  |
| -3 | 4 | -13 | 14.82  | 2.48  |
| -3 | 4 | -13 | 14.96  | 1.29  |
| -3 | 4 | -13 | 14.00  | 1.02  |
| -3 | 4 | -12 | 144.48 | 3.63  |
| -3 | 4 | -12 | 146.69 | 4.29  |
| -3 | 4 | -12 | 152.04 | 3.74  |
| -3 | 4 | -11 | 30.15  | 1.90  |

## CIF 31

|    |   |     |        |       |
|----|---|-----|--------|-------|
| -3 | 4 | -11 | 23.16  | 2.08  |
| -3 | 4 | -11 | 28.14  | 2.22  |
| -3 | 4 | -11 | 26.04  | 1.77  |
| -3 | 4 | -11 | 24.80  | 6.24  |
| -3 | 4 | -11 | 27.47  | 3.48  |
| -3 | 4 | -10 | 15.70  | 2.76  |
| -3 | 4 | -10 | 20.64  | 1.66  |
| -3 | 4 | -10 | 26.11  | 2.23  |
| -3 | 4 | -10 | 16.60  | 4.51  |
| -3 | 4 | -10 | 22.10  | 2.20  |
| -3 | 4 | -10 | 19.72  | 2.01  |
| -3 | 4 | -10 | 22.24  | 1.73  |
| -3 | 4 | -10 | 16.60  | 4.71  |
| -3 | 4 | -9  | 63.54  | 3.40  |
| -3 | 4 | -9  | 59.93  | 3.03  |
| -3 | 4 | -9  | 58.95  | 3.20  |
| -3 | 4 | -9  | 52.47  | 2.77  |
| -3 | 4 | -9  | 62.90  | 2.68  |
| -3 | 4 | -9  | 50.26  | 3.13  |
| -3 | 4 | -9  | 68.87  | 3.76  |
| -3 | 4 | -9  | 66.16  | 3.61  |
| -3 | 4 | -9  | 61.47  | 2.74  |
| -3 | 4 | -9  | 56.46  | 3.01  |
| -3 | 4 | -8  | 557.76 | 9.56  |
| -3 | 4 | -8  | 534.06 | 10.57 |
| -3 | 4 | -8  | 534.43 | 11.77 |
| -3 | 4 | -8  | 554.24 | 9.02  |
| -3 | 4 | -8  | 541.30 | 9.82  |
| -3 | 4 | -8  | 556.00 | 9.16  |
| -3 | 4 | -8  | 546.57 | 8.83  |
| -3 | 4 | -8  | 593.89 | 9.12  |
| -3 | 4 | -8  | 558.12 | 10.28 |
| -3 | 4 | -8  | 504.59 | 9.15  |
| -3 | 4 | -7  | 42.32  | 2.31  |
| -3 | 4 | -7  | 41.84  | 2.68  |
| -3 | 4 | -7  | 46.97  | 2.24  |
| -3 | 4 | -7  | 40.95  | 3.10  |
| -3 | 4 | -7  | 40.24  | 2.76  |
| -3 | 4 | -7  | 38.45  | 2.56  |
| -3 | 4 | -7  | 43.39  | 2.42  |
| -3 | 4 | -7  | 43.81  | 2.33  |



## CIF 31

|    |   |    |        |       |
|----|---|----|--------|-------|
| -3 | 4 | -7 | 45.81  | 2.73  |
| -3 | 4 | -7 | 41.28  | 2.78  |
| -3 | 4 | -7 | 39.31  | 2.07  |
| -3 | 4 | -7 | 41.60  | 2.20  |
| -3 | 4 | -7 | 41.61  | 2.30  |
| -3 | 4 | -7 | 44.85  | 2.32  |
| -3 | 4 | -6 | 249.11 | 5.50  |
| -3 | 4 | -6 | 253.89 | 5.28  |
| -3 | 4 | -6 | 238.61 | 5.21  |
| -3 | 4 | -6 | 240.30 | 6.93  |
| -3 | 4 | -6 | 230.71 | 6.00  |
| -3 | 4 | -6 | 245.60 | 6.48  |
| -3 | 4 | -6 | 253.35 | 6.10  |
| -3 | 4 | -6 | 245.70 | 5.97  |
| -3 | 4 | -6 | 237.51 | 5.00  |
| -3 | 4 | -6 | 244.06 | 4.93  |
| -3 | 4 | -6 | 248.82 | 6.50  |
| -3 | 4 | -6 | 241.03 | 5.13  |
| -3 | 4 | -6 | 241.25 | 5.43  |
| -3 | 4 | -6 | 232.03 | 5.14  |
| -3 | 4 | -6 | 260.68 | 5.34  |
| -3 | 4 | -5 | 655.50 | 10.26 |
| -3 | 4 | -5 | 699.44 | 10.32 |
| -3 | 4 | -5 | 618.00 | 11.31 |
| -3 | 4 | -5 | 691.20 | 10.71 |
| -3 | 4 | -5 | 672.50 | 10.24 |
| -3 | 4 | -5 | 712.68 | 11.26 |
| -3 | 4 | -5 | 748.95 | 11.55 |
| -3 | 4 | -5 | 749.50 | 9.89  |
| -3 | 4 | -5 | 671.62 | 8.86  |
| -3 | 4 | -5 | 723.28 | 9.08  |
| -3 | 4 | -5 | 638.34 | 8.89  |
| -3 | 4 | -5 | 635.86 | 9.04  |
| -3 | 4 | -5 | 655.76 | 9.30  |
| -3 | 4 | -5 | 655.05 | 9.18  |
| -3 | 4 | -4 | 358.65 | 5.98  |
| -3 | 4 | -4 | 442.22 | 8.40  |
| -3 | 4 | -4 | 468.91 | 8.33  |
| -3 | 4 | -4 | 415.95 | 6.03  |
| -3 | 4 | -4 | 393.34 | 6.31  |
| -3 | 4 | -4 | 456.37 | 8.15  |

## CIF 31

|    |   |    |         |       |
|----|---|----|---------|-------|
| -3 | 4 | -4 | 413.86  | 7.54  |
| -3 | 4 | -4 | 391.63  | 6.72  |
| -3 | 4 | -3 | 260.31  | 4.47  |
| -3 | 4 | -3 | 270.73  | 5.69  |
| -3 | 4 | -3 | 280.54  | 5.01  |
| -3 | 4 | -3 | 279.10  | 4.46  |
| -3 | 4 | -3 | 276.40  | 5.28  |
| -3 | 4 | -3 | 278.02  | 4.46  |
| -3 | 4 | -2 | 4685.31 | 38.89 |
| -3 | 4 | -2 | 4592.20 | 41.49 |
| -3 | 4 | -2 | 4610.39 | 40.82 |
| -3 | 4 | -2 | 4660.26 | 40.21 |
| -3 | 4 | -2 | 4535.18 | 40.21 |
| -3 | 4 | -2 | 4740.52 | 41.83 |
| -3 | 4 | -2 | 4618.53 | 41.97 |
| -3 | 4 | -2 | 4758.14 | 40.91 |
| -3 | 4 | -1 | 1126.09 | 12.84 |
| -3 | 4 | -1 | 1078.19 | 11.15 |
| -3 | 4 | -1 | 1063.90 | 12.76 |
| -3 | 4 | -1 | 1119.04 | 12.57 |
| -3 | 4 | -1 | 1154.48 | 11.36 |
| -3 | 4 | -1 | 1090.79 | 12.63 |
| -3 | 4 | -1 | 1090.71 | 10.06 |
| -3 | 4 | -1 | 1021.10 | 11.62 |
| -3 | 4 | -1 | 1159.98 | 12.22 |
| -3 | 4 | 0  | 1617.62 | 14.57 |
| -3 | 4 | 0  | 1703.52 | 17.32 |
| -3 | 4 | 0  | 1594.30 | 15.49 |
| -3 | 4 | 0  | 1687.07 | 16.78 |
| -3 | 4 | 0  | 1612.55 | 16.19 |
| -3 | 4 | 0  | 1727.53 | 17.49 |
| -3 | 4 | 0  | 1717.99 | 17.66 |
| -3 | 4 | 0  | 1772.36 | 16.33 |
| -3 | 4 | 0  | 1680.27 | 17.46 |
| -3 | 4 | 0  | 1586.11 | 14.94 |
| -3 | 4 | 0  | 1738.74 | 17.11 |
| -3 | 4 | 1  | 996.49  | 10.20 |
| -3 | 4 | 1  | 969.23  | 8.89  |
| -3 | 4 | 1  | 1039.39 | 11.76 |
| -3 | 4 | 1  | 1095.56 | 10.93 |
| -3 | 4 | 1  | 1016.87 | 11.98 |

## CIF 31

|    |   |   |         |       |
|----|---|---|---------|-------|
| -3 | 4 | 1 | 1033.04 | 12.01 |
| -3 | 4 | 1 | 1019.75 | 9.50  |
| -3 | 4 | 1 | 960.68  | 10.42 |
| -3 | 4 | 1 | 916.21  | 11.58 |
| -3 | 4 | 1 | 960.98  | 10.63 |
| -3 | 4 | 1 | 1008.45 | 11.80 |
| -3 | 4 | 2 | 24.18   | 1.12  |
| -3 | 4 | 2 | 26.13   | 1.27  |
| -3 | 4 | 2 | 26.03   | 1.54  |
| -3 | 4 | 2 | 24.33   | 1.56  |
| -3 | 4 | 2 | 23.99   | 1.44  |
| -3 | 4 | 2 | 22.89   | 1.53  |
| -3 | 4 | 2 | 26.15   | 1.29  |
| -3 | 4 | 2 | 24.66   | 1.57  |
| -3 | 4 | 3 | 2345.68 | 22.91 |
| -3 | 4 | 3 | 2297.23 | 22.81 |
| -3 | 4 | 3 | 2124.28 | 20.90 |
| -3 | 4 | 3 | 2241.20 | 20.61 |
| -3 | 4 | 3 | 2223.16 | 20.04 |
| -3 | 4 | 3 | 2268.63 | 22.33 |
| -3 | 4 | 3 | 2228.79 | 20.34 |
| -3 | 4 | 3 | 2308.52 | 23.10 |
| -3 | 4 | 3 | 1997.71 | 21.57 |
| -3 | 4 | 3 | 2158.31 | 21.00 |
| -3 | 4 | 4 | 379.04  | 5.00  |
| -3 | 4 | 4 | 393.04  | 6.95  |
| -3 | 4 | 4 | 370.54  | 5.58  |
| -3 | 4 | 4 | 382.88  | 5.27  |
| -3 | 4 | 4 | 391.83  | 6.54  |
| -3 | 4 | 4 | 401.01  | 7.02  |
| -3 | 4 | 4 | 398.53  | 5.95  |
| -3 | 4 | 4 | 376.94  | 6.21  |
| -3 | 4 | 4 | 413.21  | 6.21  |
| -3 | 4 | 4 | 425.65  | 7.41  |
| -3 | 4 | 4 | 396.43  | 7.14  |
| -3 | 4 | 5 | 79.24   | 3.04  |
| -3 | 4 | 5 | 86.10   | 3.29  |
| -3 | 4 | 5 | 89.54   | 2.59  |
| -3 | 4 | 5 | 81.56   | 2.17  |
| -3 | 4 | 5 | 80.53   | 3.37  |
| -3 | 4 | 5 | 81.13   | 3.08  |

## CIF 31

|    |   |    |        |       |
|----|---|----|--------|-------|
| -3 | 4 | 5  | 84.16  | 2.64  |
| -3 | 4 | 5  | 73.63  | 2.37  |
| -3 | 4 | 5  | 83.68  | 2.81  |
| -3 | 4 | 5  | 84.20  | 2.75  |
| -3 | 4 | 6  | 83.83  | 3.21  |
| -3 | 4 | 6  | 85.31  | 3.26  |
| -3 | 4 | 6  | 81.01  | 2.24  |
| -3 | 4 | 6  | 91.08  | 2.86  |
| -3 | 4 | 6  | 85.58  | 3.38  |
| -3 | 4 | 6  | 80.04  | 3.53  |
| -3 | 4 | 6  | 89.01  | 2.85  |
| -3 | 4 | 6  | 86.90  | 3.47  |
| -3 | 4 | 6  | 81.04  | 2.75  |
| -3 | 4 | 6  | 86.59  | 2.98  |
| -3 | 4 | 7  | 264.89 | 6.91  |
| -3 | 4 | 7  | 279.06 | 6.42  |
| -3 | 4 | 7  | 264.97 | 6.02  |
| -3 | 4 | 7  | 262.88 | 6.06  |
| -3 | 4 | 7  | 275.23 | 5.63  |
| -3 | 4 | 7  | 267.35 | 6.38  |
| -3 | 4 | 8  | 464.24 | 9.75  |
| -3 | 4 | 8  | 479.36 | 8.16  |
| -3 | 4 | 8  | 490.30 | 10.37 |
| -3 | 4 | 8  | 449.37 | 8.68  |
| -3 | 4 | 8  | 477.55 | 9.41  |
| -3 | 4 | 9  | 2.21   | 1.52  |
| -3 | 4 | 9  | 0.65   | 0.71  |
| -3 | 4 | 9  | 2.39   | 1.27  |
| -3 | 4 | 9  | 1.54   | 1.17  |
| -3 | 4 | 9  | 1.71   | 0.81  |
| -3 | 4 | 9  | 1.07   | 0.94  |
| -3 | 4 | 10 | 219.34 | 6.71  |
| -3 | 4 | 10 | 221.45 | 6.54  |
| -3 | 4 | 11 | 341.87 | 6.76  |
| -3 | 4 | 11 | 306.74 | 7.48  |
| -3 | 4 | 11 | 302.64 | 7.56  |
| -3 | 4 | 11 | 270.78 | 6.75  |
| -3 | 4 | 11 | 301.41 | 8.00  |
| -3 | 4 | 11 | 311.56 | 6.79  |
| -3 | 4 | 11 | 283.16 | 7.75  |
| -3 | 4 | 12 | 130.90 | 4.15  |

## CIF 31

|    |   |     |        |      |
|----|---|-----|--------|------|
| -3 | 4 | 12  | 131.82 | 4.30 |
| -3 | 4 | 12  | 146.07 | 4.73 |
| -3 | 4 | 12  | 138.08 | 4.88 |
| -3 | 4 | 12  | 134.92 | 4.78 |
| -3 | 4 | 13  | 12.74  | 1.35 |
| -3 | 4 | 13  | 13.44  | 1.32 |
| -3 | 4 | 14  | 118.73 | 2.89 |
| -3 | 5 | -14 | 34.17  | 1.71 |
| -3 | 5 | -14 | 45.81  | 1.54 |
| -3 | 5 | -13 | 36.06  | 2.27 |
| -3 | 5 | -12 | 392.91 | 7.12 |
| -3 | 5 | -12 | 381.30 | 7.03 |
| -3 | 5 | -12 | 387.17 | 5.96 |
| -3 | 5 | -11 | 2.41   | 1.18 |
| -3 | 5 | -11 | 1.03   | 3.43 |
| -3 | 5 | -11 | 4.59   | 1.20 |
| -3 | 5 | -11 | 2.24   | 0.77 |
| -3 | 5 | -11 | 2.49   | 0.90 |
| -3 | 5 | -10 | 13.49  | 2.00 |
| -3 | 5 | -10 | 10.83  | 4.73 |
| -3 | 5 | -10 | 8.13   | 3.13 |
| -3 | 5 | -10 | 10.44  | 1.63 |
| -3 | 5 | -10 | 9.77   | 1.15 |
| -3 | 5 | -10 | 10.66  | 1.64 |
| -3 | 5 | -10 | 10.66  | 1.58 |
| -3 | 5 | -10 | 7.77   | 1.24 |
| -3 | 5 | -9  | 0.72   | 0.86 |
| -3 | 5 | -9  | 2.75   | 1.32 |
| -3 | 5 | -9  | 1.03   | 2.25 |
| -3 | 5 | -9  | 0.51   | 1.72 |
| -3 | 5 | -9  | 0.89   | 1.04 |
| -3 | 5 | -9  | 4.91   | 1.71 |
| -3 | 5 | -9  | 0.22   | 2.95 |
| -3 | 5 | -9  | 0.04   | 1.04 |
| -3 | 5 | -8  | 28.80  | 2.10 |
| -3 | 5 | -8  | 31.45  | 2.06 |
| -3 | 5 | -8  | 29.44  | 2.18 |
| -3 | 5 | -8  | 33.34  | 2.57 |
| -3 | 5 | -8  | 34.42  | 2.44 |
| -3 | 5 | -8  | 32.42  | 2.73 |
| -3 | 5 | -8  | 30.24  | 2.02 |

## CIF 31

|    |   |    |       |      |
|----|---|----|-------|------|
| -3 | 5 | -8 | 29.12 | 3.07 |
| -3 | 5 | -8 | 30.56 | 3.06 |
| -3 | 5 | -8 | 31.65 | 2.66 |
| -3 | 5 | -8 | 29.46 | 2.33 |
| -3 | 5 | -8 | 27.50 | 2.09 |
| -3 | 5 | -7 | 55.06 | 3.66 |
| -3 | 5 | -7 | 58.42 | 2.63 |
| -3 | 5 | -7 | 54.81 | 2.66 |
| -3 | 5 | -7 | 56.29 | 3.13 |
| -3 | 5 | -7 | 53.97 | 2.86 |
| -3 | 5 | -7 | 53.23 | 3.04 |
| -3 | 5 | -7 | 54.89 | 3.35 |
| -3 | 5 | -7 | 52.28 | 3.31 |
| -3 | 5 | -7 | 59.37 | 2.57 |
| -3 | 5 | -7 | 46.14 | 3.25 |
| -3 | 5 | -7 | 51.27 | 2.51 |
| -3 | 5 | -7 | 58.14 | 2.82 |
| -3 | 5 | -7 | 48.93 | 2.52 |
| -3 | 5 | -6 | 75.00 | 2.73 |
| -3 | 5 | -6 | 67.55 | 3.18 |
| -3 | 5 | -6 | 76.97 | 3.79 |
| -3 | 5 | -6 | 68.38 | 3.10 |
| -3 | 5 | -6 | 71.45 | 3.62 |
| -3 | 5 | -6 | 59.31 | 3.44 |
| -3 | 5 | -6 | 76.96 | 2.97 |
| -3 | 5 | -6 | 76.74 | 2.75 |
| -3 | 5 | -6 | 71.34 | 3.04 |
| -3 | 5 | -6 | 73.52 | 2.81 |
| -3 | 5 | -6 | 76.99 | 2.99 |
| -3 | 5 | -6 | 64.25 | 2.65 |
| -3 | 5 | -6 | 70.59 | 3.37 |
| -3 | 5 | -5 | 0.94  | 0.90 |
| -3 | 5 | -5 | 2.42  | 0.78 |
| -3 | 5 | -5 | 1.94  | 1.08 |
| -3 | 5 | -5 | 1.86  | 1.06 |
| -3 | 5 | -5 | 1.85  | 0.90 |
| -3 | 5 | -5 | 1.22  | 0.83 |
| -3 | 5 | -5 | 1.06  | 0.90 |
| -3 | 5 | -5 | 1.16  | 0.89 |
| -3 | 5 | -5 | 3.11  | 0.90 |
| -3 | 5 | -5 | 2.00  | 0.80 |

## CIF 31

|    |   |    |         |       |
|----|---|----|---------|-------|
| -3 | 5 | -5 | 1.76    | 0.74  |
| -3 | 5 | -5 | 1.69    | 0.74  |
| -3 | 5 | -5 | 1.06    | 0.64  |
| -3 | 5 | -4 | 143.31  | 4.19  |
| -3 | 5 | -4 | 124.03  | 4.50  |
| -3 | 5 | -4 | 145.54  | 4.48  |
| -3 | 5 | -4 | 137.91  | 4.47  |
| -3 | 5 | -4 | 158.00  | 3.77  |
| -3 | 5 | -4 | 153.36  | 3.61  |
| -3 | 5 | -4 | 145.15  | 4.51  |
| -3 | 5 | -4 | 140.93  | 3.85  |
| -3 | 5 | -4 | 152.88  | 3.79  |
| -3 | 5 | -4 | 143.80  | 3.98  |
| -3 | 5 | -3 | 1278.39 | 13.50 |
| -3 | 5 | -3 | 1204.10 | 12.04 |
| -3 | 5 | -3 | 1201.66 | 15.27 |
| -3 | 5 | -3 | 1260.08 | 15.41 |
| -3 | 5 | -3 | 1243.47 | 14.07 |
| -3 | 5 | -3 | 1184.69 | 13.18 |
| -3 | 5 | -3 | 1120.49 | 14.38 |
| -3 | 5 | -3 | 1206.53 | 14.45 |
| -3 | 5 | -3 | 1228.64 | 12.99 |
| -3 | 5 | -2 | 387.00  | 5.92  |
| -3 | 5 | -2 | 414.11  | 6.42  |
| -3 | 5 | -2 | 366.72  | 4.95  |
| -3 | 5 | -2 | 457.92  | 7.78  |
| -3 | 5 | -2 | 379.47  | 6.96  |
| -3 | 5 | -2 | 423.33  | 6.76  |
| -3 | 5 | -2 | 446.96  | 6.97  |
| -3 | 5 | -2 | 395.90  | 5.89  |
| -3 | 5 | -2 | 457.56  | 7.35  |
| -3 | 5 | -2 | 432.35  | 6.33  |
| -3 | 5 | -1 | 452.18  | 7.18  |
| -3 | 5 | -1 | 449.25  | 7.23  |
| -3 | 5 | -1 | 438.58  | 6.18  |
| -3 | 5 | -1 | 449.07  | 6.51  |
| -3 | 5 | -1 | 414.88  | 7.24  |
| -3 | 5 | -1 | 420.97  | 5.24  |
| -3 | 5 | -1 | 422.67  | 7.41  |
| -3 | 5 | -1 | 473.77  | 7.61  |
| -3 | 5 | -1 | 434.72  | 6.44  |

## CIF 31

|    |   |    |         |       |
|----|---|----|---------|-------|
| -3 | 5 | -1 | 464.02  | 6.87  |
| -3 | 5 | 0  | 89.99   | 2.04  |
| -3 | 5 | 0  | 125.97  | 3.56  |
| -3 | 5 | 0  | 102.10  | 2.60  |
| -3 | 5 | 0  | 135.90  | 3.42  |
| -3 | 5 | 0  | 124.59  | 3.41  |
| -3 | 5 | 0  | 113.22  | 2.79  |
| -3 | 5 | 0  | 136.27  | 3.61  |
| -3 | 5 | 0  | 137.32  | 3.77  |
| -3 | 5 | 0  | 116.65  | 2.71  |
| -3 | 5 | 0  | 122.51  | 3.60  |
| -3 | 5 | 0  | 107.55  | 2.90  |
| -3 | 5 | 1  | 3322.13 | 28.28 |
| -3 | 5 | 1  | 3125.05 | 29.03 |
| -3 | 5 | 1  | 3480.59 | 32.39 |
| -3 | 5 | 1  | 3124.60 | 30.43 |
| -3 | 5 | 1  | 3435.42 | 30.21 |
| -3 | 5 | 1  | 3215.22 | 30.99 |
| -3 | 5 | 1  | 3710.17 | 32.21 |
| -3 | 5 | 1  | 3430.43 | 32.51 |
| -3 | 5 | 1  | 3454.06 | 30.27 |
| -3 | 5 | 1  | 3283.38 | 32.30 |
| -3 | 5 | 1  | 3102.89 | 32.03 |
| -3 | 5 | 1  | 3633.21 | 32.31 |
| -3 | 5 | 2  | 1667.29 | 16.04 |
| -3 | 5 | 2  | 1689.97 | 18.17 |
| -3 | 5 | 2  | 1552.54 | 15.86 |
| -3 | 5 | 2  | 1528.79 | 17.72 |
| -3 | 5 | 2  | 1721.56 | 18.24 |
| -3 | 5 | 2  | 1645.28 | 18.05 |
| -3 | 5 | 2  | 1460.96 | 14.46 |
| -3 | 5 | 2  | 1495.37 | 14.99 |
| -3 | 5 | 3  | 188.17  | 4.89  |
| -3 | 5 | 3  | 210.55  | 4.05  |
| -3 | 5 | 3  | 189.34  | 3.89  |
| -3 | 5 | 3  | 197.38  | 5.06  |
| -3 | 5 | 3  | 172.63  | 4.44  |
| -3 | 5 | 3  | 190.79  | 4.77  |
| -3 | 5 | 3  | 192.96  | 5.00  |
| -3 | 5 | 4  | 256.50  | 6.09  |
| -3 | 5 | 4  | 232.63  | 5.71  |



## CIF 31

|    |   |   |         |       |
|----|---|---|---------|-------|
| -3 | 5 | 4 | 230.88  | 4.49  |
| -3 | 5 | 4 | 233.08  | 4.60  |
| -3 | 5 | 4 | 245.36  | 5.63  |
| -3 | 5 | 4 | 217.31  | 4.97  |
| -3 | 5 | 4 | 222.77  | 5.04  |
| -3 | 5 | 4 | 237.58  | 5.44  |
| -3 | 5 | 4 | 261.92  | 6.11  |
| -3 | 5 | 5 | 986.24  | 14.07 |
| -3 | 5 | 5 | 1046.66 | 14.28 |
| -3 | 5 | 5 | 975.78  | 12.33 |
| -3 | 5 | 5 | 1022.20 | 12.10 |
| -3 | 5 | 5 | 965.63  | 14.32 |
| -3 | 5 | 5 | 960.90  | 13.12 |
| -3 | 5 | 6 | 21.30   | 2.09  |
| -3 | 5 | 6 | 18.72   | 1.83  |
| -3 | 5 | 6 | 20.71   | 1.48  |
| -3 | 5 | 6 | 21.75   | 1.70  |
| -3 | 5 | 6 | 22.53   | 1.59  |
| -3 | 5 | 6 | 24.07   | 2.12  |
| -3 | 5 | 6 | 21.40   | 2.13  |
| -3 | 5 | 6 | 21.35   | 1.95  |
| -3 | 5 | 7 | 79.83   | 3.61  |
| -3 | 5 | 7 | 78.39   | 4.05  |
| -3 | 5 | 7 | 82.00   | 3.67  |
| -3 | 5 | 7 | 84.24   | 3.15  |
| -3 | 5 | 7 | 79.28   | 3.57  |
| -3 | 5 | 7 | 83.58   | 2.98  |
| -3 | 5 | 7 | 79.09   | 3.23  |
| -3 | 5 | 7 | 79.72   | 3.71  |
| -3 | 5 | 7 | 75.55   | 3.76  |
| -3 | 5 | 8 | 174.27  | 6.26  |
| -3 | 5 | 8 | 207.08  | 5.21  |
| -3 | 5 | 8 | 179.36  | 5.58  |
| -3 | 5 | 8 | 184.04  | 6.24  |
| -3 | 5 | 8 | 171.86  | 5.20  |
| -3 | 5 | 8 | 181.20  | 5.32  |
| -3 | 5 | 8 | 191.34  | 4.65  |
| -3 | 5 | 8 | 204.89  | 5.42  |
| -3 | 5 | 8 | 181.14  | 5.87  |
| -3 | 5 | 9 | 160.18  | 4.63  |
| -3 | 5 | 9 | 149.79  | 5.63  |

## CIF 31

|    |   |     |        |      |
|----|---|-----|--------|------|
| -3 | 5 | 9   | 135.05 | 4.99 |
| -3 | 5 | 9   | 144.89 | 5.66 |
| -3 | 5 | 9   | 130.26 | 5.46 |
| -3 | 5 | 9   | 165.21 | 4.91 |
| -3 | 5 | 9   | 140.34 | 4.72 |
| -3 | 5 | 10  | 233.49 | 5.66 |
| -3 | 5 | 10  | 224.05 | 6.78 |
| -3 | 5 | 10  | 212.30 | 6.43 |
| -3 | 5 | 10  | 222.84 | 6.93 |
| -3 | 5 | 10  | 230.10 | 5.83 |
| -3 | 5 | 11  | 36.30  | 2.65 |
| -3 | 5 | 11  | 43.23  | 2.70 |
| -3 | 5 | 11  | 37.44  | 2.44 |
| -3 | 5 | 11  | 35.42  | 2.62 |
| -3 | 5 | 12  | 342.99 | 6.75 |
| -3 | 5 | 12  | 331.51 | 6.41 |
| -3 | 5 | 13  | 38.96  | 1.77 |
| -3 | 5 | 13  | 33.06  | 1.58 |
| -3 | 6 | -14 | 11.44  | 1.04 |
| -3 | 6 | -14 | 14.07  | 0.87 |
| -3 | 6 | -13 | 2.23   | 1.14 |
| -3 | 6 | -12 | 61.41  | 2.64 |
| -3 | 6 | -12 | 61.21  | 2.59 |
| -3 | 6 | -12 | 58.34  | 3.96 |
| -3 | 6 | -12 | 58.97  | 2.34 |
| -3 | 6 | -11 | 277.32 | 7.29 |
| -3 | 6 | -11 | 270.59 | 6.14 |
| -3 | 6 | -11 | 277.04 | 7.02 |
| -3 | 6 | -10 | 1.46   | 3.49 |
| -3 | 6 | -10 | 1.90   | 5.85 |
| -3 | 6 | -10 | 2.18   | 0.87 |
| -3 | 6 | -10 | 1.07   | 1.09 |
| -3 | 6 | -10 | 2.69   | 1.33 |
| -3 | 6 | -9  | 6.76   | 1.30 |
| -3 | 6 | -9  | 5.40   | 1.27 |
| -3 | 6 | -9  | 5.36   | 1.22 |
| -3 | 6 | -9  | 6.85   | 3.64 |
| -3 | 6 | -9  | 6.01   | 1.53 |
| -3 | 6 | -9  | 5.54   | 2.78 |
| -3 | 6 | -9  | 5.87   | 1.48 |
| -3 | 6 | -9  | 4.70   | 1.80 |

## CIF 31

|    |   |    |         |       |
|----|---|----|---------|-------|
| -3 | 6 | -9 | 8.39    | 4.23  |
| -3 | 6 | -9 | 6.07    | 1.30  |
| -3 | 6 | -8 | 554.34  | 9.26  |
| -3 | 6 | -8 | 602.60  | 10.13 |
| -3 | 6 | -8 | 551.23  | 10.57 |
| -3 | 6 | -8 | 566.76  | 11.82 |
| -3 | 6 | -8 | 581.26  | 11.18 |
| -3 | 6 | -8 | 527.77  | 11.64 |
| -3 | 6 | -8 | 592.14  | 10.08 |
| -3 | 6 | -8 | 601.74  | 9.68  |
| -3 | 6 | -8 | 574.41  | 11.09 |
| -3 | 6 | -8 | 563.34  | 10.16 |
| -3 | 6 | -8 | 576.40  | 9.60  |
| -3 | 6 | -7 | 141.77  | 3.92  |
| -3 | 6 | -7 | 131.72  | 4.29  |
| -3 | 6 | -7 | 133.31  | 4.27  |
| -3 | 6 | -7 | 121.79  | 4.46  |
| -3 | 6 | -7 | 136.66  | 5.05  |
| -3 | 6 | -7 | 146.09  | 5.61  |
| -3 | 6 | -7 | 159.28  | 4.34  |
| -3 | 6 | -7 | 113.74  | 5.33  |
| -3 | 6 | -7 | 135.40  | 4.86  |
| -3 | 6 | -7 | 138.24  | 5.47  |
| -3 | 6 | -7 | 145.54  | 4.48  |
| -3 | 6 | -7 | 135.82  | 4.06  |
| -3 | 6 | -6 | 23.07   | 2.31  |
| -3 | 6 | -6 | 21.96   | 1.96  |
| -3 | 6 | -6 | 18.04   | 2.10  |
| -3 | 6 | -6 | 22.60   | 2.14  |
| -3 | 6 | -6 | 17.53   | 1.82  |
| -3 | 6 | -6 | 20.88   | 2.33  |
| -3 | 6 | -6 | 18.05   | 1.69  |
| -3 | 6 | -6 | 19.71   | 1.67  |
| -3 | 6 | -6 | 18.59   | 1.64  |
| -3 | 6 | -6 | 17.58   | 1.94  |
| -3 | 6 | -6 | 17.88   | 1.48  |
| -3 | 6 | -5 | 2425.68 | 26.70 |
| -3 | 6 | -5 | 2374.26 | 29.03 |
| -3 | 6 | -5 | 2752.05 | 28.62 |
| -3 | 6 | -5 | 2698.12 | 27.72 |
| -3 | 6 | -5 | 2571.01 | 25.65 |

## CIF 31

|    |   |    |         |       |
|----|---|----|---------|-------|
| -3 | 6 | -5 | 2432.97 | 28.49 |
| -3 | 6 | -5 | 2419.07 | 28.13 |
| -3 | 6 | -5 | 2362.26 | 25.39 |
| -3 | 6 | -5 | 2505.37 | 25.14 |
| -3 | 6 | -5 | 2574.48 | 26.51 |
| -3 | 6 | -5 | 2521.94 | 25.10 |
| -3 | 6 | -4 | 2.35    | 1.00  |
| -3 | 6 | -4 | 0.55    | 0.87  |
| -3 | 6 | -4 | -0.31   | 0.65  |
| -3 | 6 | -4 | 2.41    | 0.78  |
| -3 | 6 | -4 | 0.46    | 0.77  |
| -3 | 6 | -4 | 5.98    | 0.72  |
| -3 | 6 | -4 | 0.71    | 0.93  |
| -3 | 6 | -4 | 0.13    | 0.57  |
| -3 | 6 | -4 | 0.87    | 0.64  |
| -3 | 6 | -4 | 4.03    | 1.09  |
| -3 | 6 | -4 | 3.56    | 0.98  |
| -3 | 6 | -3 | 3274.63 | 30.06 |
| -3 | 6 | -3 | 3189.07 | 28.32 |
| -3 | 6 | -3 | 3139.72 | 32.45 |
| -3 | 6 | -3 | 3219.38 | 32.35 |
| -3 | 6 | -3 | 3186.19 | 31.65 |
| -3 | 6 | -3 | 3040.90 | 32.18 |
| -3 | 6 | -3 | 3144.05 | 32.66 |
| -3 | 6 | -3 | 3171.25 | 30.57 |
| -3 | 6 | -3 | 2988.44 | 29.34 |
| -3 | 6 | -3 | 2851.27 | 31.34 |
| -3 | 6 | -3 | 2988.82 | 31.78 |
| -3 | 6 | -3 | 3089.83 | 31.31 |
| -3 | 6 | -2 | 775.74  | 11.78 |
| -3 | 6 | -2 | 808.99  | 11.64 |
| -3 | 6 | -2 | 808.20  | 10.26 |
| -3 | 6 | -2 | 885.05  | 12.55 |
| -3 | 6 | -2 | 811.65  | 11.13 |
| -3 | 6 | -2 | 797.17  | 11.55 |
| -3 | 6 | -2 | 871.68  | 11.47 |
| -3 | 6 | -2 | 755.27  | 8.95  |
| -3 | 6 | -2 | 745.56  | 11.56 |
| -3 | 6 | -2 | 827.16  | 10.46 |
| -3 | 6 | -1 | 164.31  | 4.60  |
| -3 | 6 | -1 | 171.21  | 4.52  |

## CIF 31

|    |   |    |        |       |
|----|---|----|--------|-------|
| -3 | 6 | -1 | 182.86 | 4.03  |
| -3 | 6 | -1 | 173.84 | 4.43  |
| -3 | 6 | -1 | 167.14 | 3.97  |
| -3 | 6 | -1 | 177.54 | 5.05  |
| -3 | 6 | -1 | 167.43 | 3.22  |
| -3 | 6 | -1 | 182.72 | 5.02  |
| -3 | 6 | -1 | 167.06 | 4.60  |
| -3 | 6 | -1 | 193.82 | 3.93  |
| -3 | 6 | -1 | 154.68 | 4.74  |
| -3 | 6 | -1 | 166.83 | 4.69  |
| -3 | 6 | -1 | 180.31 | 4.82  |
| -3 | 6 | -1 | 174.19 | 4.30  |
| -3 | 6 | 0  | 762.68 | 11.25 |
| -3 | 6 | 0  | 703.59 | 8.60  |
| -3 | 6 | 0  | 791.87 | 10.85 |
| -3 | 6 | 0  | 788.50 | 11.24 |
| -3 | 6 | 0  | 775.62 | 11.45 |
| -3 | 6 | 0  | 770.00 | 9.75  |
| -3 | 6 | 0  | 786.92 | 11.88 |
| -3 | 6 | 0  | 760.91 | 11.18 |
| -3 | 6 | 0  | 715.96 | 10.59 |
| -3 | 6 | 0  | 823.58 | 9.61  |
| -3 | 6 | 0  | 698.49 | 11.38 |
| -3 | 6 | 0  | 787.10 | 11.47 |
| -3 | 6 | 0  | 789.51 | 10.61 |
| -3 | 6 | 1  | 213.90 | 5.62  |
| -3 | 6 | 1  | 221.75 | 4.93  |
| -3 | 6 | 1  | 231.67 | 5.59  |
| -3 | 6 | 1  | 245.69 | 5.85  |
| -3 | 6 | 1  | 252.27 | 4.80  |
| -3 | 6 | 1  | 271.61 | 4.39  |
| -3 | 6 | 1  | 249.94 | 4.55  |
| -3 | 6 | 1  | 222.94 | 5.67  |
| -3 | 6 | 1  | 251.43 | 3.62  |
| -3 | 6 | 1  | 272.32 | 4.69  |
| -3 | 6 | 1  | 245.21 | 6.10  |
| -3 | 6 | 1  | 210.46 | 5.56  |
| -3 | 6 | 1  | 238.71 | 5.65  |
| -3 | 6 | 1  | 242.35 | 5.73  |
| -3 | 6 | 1  | 222.38 | 5.32  |
| -3 | 6 | 2  | 295.37 | 6.22  |

## CIF 31

|    |   |   |        |       |
|----|---|---|--------|-------|
| -3 | 6 | 2 | 301.45 | 6.49  |
| -3 | 6 | 2 | 285.65 | 6.42  |
| -3 | 6 | 2 | 281.46 | 6.68  |
| -3 | 6 | 2 | 307.06 | 6.74  |
| -3 | 6 | 2 | 311.50 | 5.53  |
| -3 | 6 | 2 | 272.65 | 4.22  |
| -3 | 6 | 2 | 277.89 | 4.89  |
| -3 | 6 | 2 | 259.18 | 4.56  |
| -3 | 6 | 2 | 241.43 | 4.64  |
| -3 | 6 | 2 | 295.53 | 6.61  |
| -3 | 6 | 3 | 306.74 | 4.93  |
| -3 | 6 | 3 | 309.67 | 7.21  |
| -3 | 6 | 3 | 331.56 | 7.28  |
| -3 | 6 | 3 | 327.18 | 6.78  |
| -3 | 6 | 3 | 302.22 | 5.31  |
| -3 | 6 | 3 | 328.77 | 7.09  |
| -3 | 6 | 3 | 313.39 | 7.43  |
| -3 | 6 | 3 | 328.33 | 5.94  |
| -3 | 6 | 3 | 297.50 | 5.95  |
| -3 | 6 | 3 | 359.50 | 5.62  |
| -3 | 6 | 3 | 337.51 | 7.42  |
| -3 | 6 | 4 | 578.69 | 8.79  |
| -3 | 6 | 4 | 638.42 | 9.43  |
| -3 | 6 | 4 | 624.01 | 8.56  |
| -3 | 6 | 4 | 561.37 | 9.53  |
| -3 | 6 | 4 | 561.40 | 10.39 |
| -3 | 6 | 4 | 580.48 | 10.71 |
| -3 | 6 | 4 | 589.72 | 8.17  |
| -3 | 6 | 4 | 581.38 | 10.13 |
| -3 | 6 | 4 | 600.40 | 10.82 |
| -3 | 6 | 4 | 568.68 | 10.10 |
| -3 | 6 | 5 | 2.31   | 1.37  |
| -3 | 6 | 5 | 0.56   | 1.10  |
| -3 | 6 | 5 | 0.32   | 0.70  |
| -3 | 6 | 5 | 0.89   | 0.56  |
| -3 | 6 | 5 | 0.85   | 1.02  |
| -3 | 6 | 5 | -0.15  | 1.00  |
| -3 | 6 | 5 | 0.28   | 0.71  |
| -3 | 6 | 5 | 1.42   | 0.89  |
| -3 | 6 | 6 | 7.43   | 1.47  |
| -3 | 6 | 6 | 7.23   | 1.20  |

## CIF 31

|    |   |     |        |      |
|----|---|-----|--------|------|
| -3 | 6 | 6   | 5.86   | 1.50 |
| -3 | 6 | 6   | 7.01   | 1.45 |
| -3 | 6 | 6   | 8.89   | 1.69 |
| -3 | 6 | 6   | 7.00   | 1.20 |
| -3 | 6 | 6   | 5.30   | 1.13 |
| -3 | 6 | 7   | 3.95   | 0.99 |
| -3 | 6 | 7   | 5.38   | 1.68 |
| -3 | 6 | 7   | 2.92   | 1.22 |
| -3 | 6 | 7   | 3.52   | 1.27 |
| -3 | 6 | 7   | 4.60   | 1.27 |
| -3 | 6 | 7   | 4.32   | 1.06 |
| -3 | 6 | 7   | 3.93   | 1.33 |
| -3 | 6 | 7   | 4.91   | 1.38 |
| -3 | 6 | 8   | 38.55  | 3.07 |
| -3 | 6 | 8   | 35.47  | 2.52 |
| -3 | 6 | 8   | 39.59  | 2.36 |
| -3 | 6 | 8   | 34.65  | 3.01 |
| -3 | 6 | 8   | 36.24  | 2.55 |
| -3 | 6 | 8   | 33.28  | 2.44 |
| -3 | 6 | 8   | 38.91  | 2.43 |
| -3 | 6 | 8   | 36.94  | 2.72 |
| -3 | 6 | 8   | 36.11  | 2.82 |
| -3 | 6 | 9   | 124.52 | 5.19 |
| -3 | 6 | 9   | 120.79 | 5.08 |
| -3 | 6 | 9   | 121.24 | 5.10 |
| -3 | 6 | 9   | 131.67 | 4.17 |
| -3 | 6 | 9   | 119.44 | 4.16 |
| -3 | 6 | 9   | 120.63 | 4.39 |
| -3 | 6 | 9   | 115.98 | 4.61 |
| -3 | 6 | 10  | 3.00   | 1.32 |
| -3 | 6 | 10  | 3.19   | 1.24 |
| -3 | 6 | 10  | 3.59   | 1.28 |
| -3 | 6 | 11  | 6.68   | 1.27 |
| -3 | 6 | 11  | 3.82   | 1.01 |
| -3 | 6 | 11  | 5.14   | 1.28 |
| -3 | 6 | 11  | 8.26   | 1.35 |
| -3 | 6 | 12  | 104.76 | 3.17 |
| -3 | 6 | 12  | 91.26  | 2.86 |
| -3 | 7 | -13 | 72.25  | 1.95 |
| -3 | 7 | -12 | 25.34  | 1.57 |
| -3 | 7 | -12 | 22.60  | 1.64 |

## CIF 31

|    |   |     |        |      |
|----|---|-----|--------|------|
| -3 | 7 | -11 | 61.33  | 3.36 |
| -3 | 7 | -11 | 57.62  | 2.67 |
| -3 | 7 | -11 | 60.97  | 2.61 |
| -3 | 7 | -11 | 61.36  | 4.47 |
| -3 | 7 | -10 | 185.71 | 5.97 |
| -3 | 7 | -10 | 171.28 | 5.94 |
| -3 | 7 | -10 | 179.70 | 5.34 |
| -3 | 7 | -9  | 14.20  | 1.91 |
| -3 | 7 | -9  | 13.64  | 1.99 |
| -3 | 7 | -9  | 13.84  | 2.07 |
| -3 | 7 | -9  | 12.63  | 1.68 |
| -3 | 7 | -9  | 13.36  | 3.64 |
| -3 | 7 | -9  | 14.56  | 1.65 |
| -3 | 7 | -8  | 59.68  | 3.36 |
| -3 | 7 | -8  | 54.71  | 3.71 |
| -3 | 7 | -8  | 56.42  | 3.69 |
| -3 | 7 | -8  | 48.96  | 2.62 |
| -3 | 7 | -8  | 56.18  | 2.79 |
| -3 | 7 | -8  | 50.46  | 3.87 |
| -3 | 7 | -8  | 49.02  | 2.84 |
| -3 | 7 | -8  | 59.89  | 4.52 |
| -3 | 7 | -7  | 44.71  | 3.16 |
| -3 | 7 | -7  | 58.37  | 4.08 |
| -3 | 7 | -7  | 65.85  | 3.98 |
| -3 | 7 | -7  | 60.20  | 3.59 |
| -3 | 7 | -7  | 53.62  | 3.04 |
| -3 | 7 | -7  | 59.98  | 3.86 |
| -3 | 7 | -7  | 47.11  | 2.74 |
| -3 | 7 | -7  | 54.35  | 2.68 |
| -3 | 7 | -7  | 51.87  | 3.53 |
| -3 | 7 | -7  | 49.76  | 3.05 |
| -3 | 7 | -7  | 44.32  | 3.25 |
| -3 | 7 | -7  | 47.16  | 2.46 |
| -3 | 7 | -6  | 2.51   | 1.59 |
| -3 | 7 | -6  | 1.51   | 1.06 |
| -3 | 7 | -6  | 1.21   | 0.89 |
| -3 | 7 | -6  | 1.45   | 1.10 |
| -3 | 7 | -6  | 3.71   | 1.44 |
| -3 | 7 | -6  | 2.15   | 1.13 |
| -3 | 7 | -6  | 1.37   | 0.92 |
| -3 | 7 | -6  | 1.15   | 1.09 |



## CIF 31

|    |   |    |        |       |
|----|---|----|--------|-------|
| -3 | 7 | -6 | 1.23   | 1.16  |
| -3 | 7 | -6 | 1.49   | 0.85  |
| -3 | 7 | -6 | 1.99   | 0.90  |
| -3 | 7 | -5 | 25.25  | 2.31  |
| -3 | 7 | -5 | 35.18  | 2.20  |
| -3 | 7 | -5 | 20.52  | 2.23  |
| -3 | 7 | -5 | 31.18  | 2.13  |
| -3 | 7 | -5 | 22.47  | 1.91  |
| -3 | 7 | -5 | 24.28  | 2.21  |
| -3 | 7 | -5 | 28.79  | 2.07  |
| -3 | 7 | -5 | 36.26  | 1.95  |
| -3 | 7 | -4 | 205.75 | 5.09  |
| -3 | 7 | -4 | 188.37 | 4.63  |
| -3 | 7 | -4 | 213.88 | 6.28  |
| -3 | 7 | -4 | 183.45 | 5.79  |
| -3 | 7 | -4 | 222.35 | 6.52  |
| -3 | 7 | -4 | 205.50 | 5.01  |
| -3 | 7 | -4 | 208.63 | 6.15  |
| -3 | 7 | -4 | 206.86 | 6.24  |
| -3 | 7 | -4 | 204.97 | 5.55  |
| -3 | 7 | -3 | 882.93 | 11.22 |
| -3 | 7 | -3 | 950.11 | 12.68 |
| -3 | 7 | -3 | 953.04 | 14.29 |
| -3 | 7 | -3 | 999.33 | 12.48 |
| -3 | 7 | -3 | 944.95 | 14.20 |
| -3 | 7 | -3 | 978.48 | 14.45 |
| -3 | 7 | -3 | 973.81 | 10.97 |
| -3 | 7 | -3 | 811.02 | 12.99 |
| -3 | 7 | -3 | 906.49 | 13.46 |
| -3 | 7 | -3 | 869.58 | 12.51 |
| -3 | 7 | -3 | 764.35 | 11.30 |
| -3 | 7 | -3 | 732.13 | 12.77 |
| -3 | 7 | -3 | 948.48 | 13.47 |
| -3 | 7 | -2 | 653.06 | 11.45 |
| -3 | 7 | -2 | 634.78 | 9.38  |
| -3 | 7 | -2 | 618.96 | 10.70 |
| -3 | 7 | -2 | 640.21 | 11.00 |
| -3 | 7 | -2 | 643.87 | 10.30 |
| -3 | 7 | -2 | 605.01 | 8.16  |
| -3 | 7 | -2 | 606.10 | 8.98  |
| -3 | 7 | -2 | 659.14 | 10.90 |

## CIF 31

|    |   |    |         |       |
|----|---|----|---------|-------|
| -3 | 7 | -2 | 632.20  | 10.20 |
| -3 | 7 | -2 | 647.14  | 9.88  |
| -3 | 7 | -2 | 583.47  | 9.41  |
| -3 | 7 | -2 | 621.57  | 9.39  |
| -3 | 7 | -1 | 3112.80 | 31.14 |
| -3 | 7 | -1 | 2998.06 | 30.05 |
| -3 | 7 | -1 | 2878.65 | 29.13 |
| -3 | 7 | -1 | 3260.82 | 32.48 |
| -3 | 7 | -1 | 3010.48 | 29.33 |
| -3 | 7 | -1 | 3065.23 | 31.20 |
| -3 | 7 | -1 | 2848.22 | 27.46 |
| -3 | 7 | -1 | 2961.47 | 30.96 |
| -3 | 7 | -1 | 2873.91 | 29.29 |
| -3 | 7 | -1 | 2998.87 | 28.50 |
| -3 | 7 | -1 | 3061.96 | 31.84 |
| -3 | 7 | -1 | 3031.61 | 30.62 |
| -3 | 7 | 0  | 1776.28 | 22.34 |
| -3 | 7 | 0  | 1993.40 | 22.76 |
| -3 | 7 | 0  | 1813.46 | 18.97 |
| -3 | 7 | 0  | 1729.93 | 20.01 |
| -3 | 7 | 0  | 1874.49 | 21.19 |
| -3 | 7 | 0  | 1931.52 | 22.72 |
| -3 | 7 | 0  | 2001.41 | 22.67 |
| -3 | 7 | 0  | 1974.01 | 23.41 |
| -3 | 7 | 0  | 1794.64 | 21.24 |
| -3 | 7 | 0  | 1974.01 | 19.69 |
| -3 | 7 | 0  | 1912.39 | 22.35 |
| -3 | 7 | 0  | 1944.31 | 20.67 |
| -3 | 7 | 0  | 1945.10 | 21.81 |
| -3 | 7 | 1  | 301.48  | 6.89  |
| -3 | 7 | 1  | 315.44  | 7.37  |
| -3 | 7 | 1  | 283.54  | 5.33  |
| -3 | 7 | 1  | 280.56  | 5.88  |
| -3 | 7 | 1  | 327.08  | 7.38  |
| -3 | 7 | 1  | 337.63  | 7.41  |
| -3 | 7 | 1  | 293.37  | 6.18  |
| -3 | 7 | 1  | 318.34  | 7.45  |
| -3 | 7 | 1  | 336.44  | 5.75  |
| -3 | 7 | 1  | 327.96  | 6.40  |
| -3 | 7 | 1  | 321.93  | 7.78  |
| -3 | 7 | 1  | 300.79  | 7.10  |

## CIF 31

|    |   |   |         |       |
|----|---|---|---------|-------|
| -3 | 7 | 2 | 1873.31 | 22.46 |
| -3 | 7 | 2 | 1755.66 | 21.32 |
| -3 | 7 | 2 | 1729.18 | 21.76 |
| -3 | 7 | 2 | 1722.42 | 19.14 |
| -3 | 7 | 2 | 1742.35 | 20.92 |
| -3 | 7 | 2 | 1667.67 | 18.03 |
| -3 | 7 | 2 | 1796.06 | 21.40 |
| -3 | 7 | 2 | 1626.46 | 21.50 |
| -3 | 7 | 2 | 1827.65 | 21.94 |
| -3 | 7 | 2 | 1690.03 | 17.98 |
| -3 | 7 | 2 | 1706.18 | 19.53 |
| -3 | 7 | 2 | 1720.26 | 21.49 |
| -3 | 7 | 3 | 54.69   | 3.25  |
| -3 | 7 | 3 | 55.95   | 3.08  |
| -3 | 7 | 3 | 50.87   | 2.48  |
| -3 | 7 | 3 | 49.44   | 2.72  |
| -3 | 7 | 3 | 51.87   | 3.11  |
| -3 | 7 | 3 | 45.39   | 2.16  |
| -3 | 7 | 3 | 48.27   | 2.03  |
| -3 | 7 | 3 | 52.79   | 2.66  |
| -3 | 7 | 3 | 56.95   | 3.29  |
| -3 | 7 | 3 | 54.63   | 3.40  |
| -3 | 7 | 4 | 209.70  | 5.19  |
| -3 | 7 | 4 | 184.09  | 6.21  |
| -3 | 7 | 4 | 192.54  | 5.13  |
| -3 | 7 | 4 | 222.28  | 6.59  |
| -3 | 7 | 4 | 203.37  | 6.39  |
| -3 | 7 | 4 | 198.00  | 6.32  |
| -3 | 7 | 4 | 194.47  | 5.83  |
| -3 | 7 | 4 | 166.35  | 5.60  |
| -3 | 7 | 4 | 191.75  | 6.28  |
| -3 | 7 | 4 | 189.31  | 4.55  |
| -3 | 7 | 4 | 173.28  | 4.00  |
| -3 | 7 | 4 | 197.00  | 5.67  |
| -3 | 7 | 5 | 28.44   | 2.37  |
| -3 | 7 | 5 | 32.78   | 2.20  |
| -3 | 7 | 5 | 28.56   | 2.17  |
| -3 | 7 | 5 | 32.71   | 2.20  |
| -3 | 7 | 5 | 27.83   | 2.61  |
| -3 | 7 | 5 | 26.62   | 2.48  |
| -3 | 7 | 5 | 27.19   | 2.77  |

## CIF 31

|    |   |    |        |      |
|----|---|----|--------|------|
| -3 | 7 | 5  | 27.99  | 2.60 |
| -3 | 7 | 5  | 29.81  | 1.90 |
| -3 | 7 | 6  | 10.78  | 1.37 |
| -3 | 7 | 6  | 11.25  | 1.80 |
| -3 | 7 | 6  | 13.96  | 1.97 |
| -3 | 7 | 6  | 11.99  | 1.98 |
| -3 | 7 | 6  | 12.99  | 2.03 |
| -3 | 7 | 6  | 11.06  | 1.85 |
| -3 | 7 | 6  | 10.78  | 1.27 |
| -3 | 7 | 6  | 11.18  | 1.52 |
| -3 | 7 | 6  | 11.99  | 1.47 |
| -3 | 7 | 7  | 39.13  | 2.82 |
| -3 | 7 | 7  | 32.80  | 3.09 |
| -3 | 7 | 7  | 39.27  | 3.01 |
| -3 | 7 | 7  | 40.35  | 2.88 |
| -3 | 7 | 7  | 45.67  | 2.56 |
| -3 | 7 | 7  | 40.97  | 2.89 |
| -3 | 7 | 7  | 50.44  | 2.53 |
| -3 | 7 | 7  | 47.16  | 2.64 |
| -3 | 7 | 7  | 41.00  | 3.03 |
| -3 | 7 | 7  | 39.51  | 3.12 |
| -3 | 7 | 8  | 72.42  | 3.48 |
| -3 | 7 | 8  | 64.31  | 3.17 |
| -3 | 7 | 8  | 76.06  | 3.25 |
| -3 | 7 | 8  | 67.66  | 3.91 |
| -3 | 7 | 8  | 74.82  | 3.04 |
| -3 | 7 | 8  | 68.91  | 3.39 |
| -3 | 7 | 8  | 72.17  | 3.71 |
| -3 | 7 | 8  | 66.58  | 3.75 |
| -3 | 7 | 8  | 78.14  | 3.30 |
| -3 | 7 | 8  | 74.37  | 3.90 |
| -3 | 7 | 9  | 55.61  | 3.40 |
| -3 | 7 | 9  | 53.42  | 3.25 |
| -3 | 7 | 9  | 52.78  | 3.21 |
| -3 | 7 | 9  | 52.32  | 2.81 |
| -3 | 7 | 9  | 49.45  | 2.92 |
| -3 | 7 | 10 | 0.69   | 1.10 |
| -3 | 7 | 10 | 1.30   | 1.00 |
| -3 | 7 | 10 | 0.36   | 0.89 |
| -3 | 7 | 11 | 105.13 | 3.19 |
| -3 | 7 | 11 | 98.71  | 3.24 |

## CIF 31

|    |   |     |        |       |
|----|---|-----|--------|-------|
| -3 | 7 | 11  | 102.59 | 3.31  |
| -3 | 8 | -13 | 46.77  | 1.68  |
| -3 | 8 | -12 | 66.62  | 2.84  |
| -3 | 8 | -12 | 60.31  | 1.93  |
| -3 | 8 | -12 | 64.68  | 2.41  |
| -3 | 8 | -12 | 61.57  | 2.20  |
| -3 | 8 | -11 | 14.51  | 1.67  |
| -3 | 8 | -11 | 12.36  | 1.25  |
| -3 | 8 | -11 | 13.34  | 1.32  |
| -3 | 8 | -10 | 93.63  | 4.09  |
| -3 | 8 | -10 | 83.71  | 4.15  |
| -3 | 8 | -10 | 91.27  | 4.35  |
| -3 | 8 | -10 | 79.10  | 3.53  |
| -3 | 8 | -10 | 78.41  | 2.99  |
| -3 | 8 | -10 | 94.10  | 5.00  |
| -3 | 8 | -9  | 24.50  | 2.62  |
| -3 | 8 | -9  | 24.30  | 2.33  |
| -3 | 8 | -9  | 24.89  | 2.61  |
| -3 | 8 | -9  | 21.36  | 2.04  |
| -3 | 8 | -9  | 23.60  | 2.23  |
| -3 | 8 | -9  | 26.31  | 1.88  |
| -3 | 8 | -8  | 4.89   | 1.82  |
| -3 | 8 | -8  | 6.86   | 2.79  |
| -3 | 8 | -8  | 6.47   | 1.53  |
| -3 | 8 | -8  | 5.45   | 1.72  |
| -3 | 8 | -8  | 6.32   | 1.82  |
| -3 | 8 | -8  | 6.16   | 1.26  |
| -3 | 8 | -8  | 6.06   | 1.38  |
| -3 | 8 | -8  | 5.36   | 1.31  |
| -3 | 8 | -8  | 6.68   | 1.18  |
| -3 | 8 | -7  | 558.64 | 9.78  |
| -3 | 8 | -7  | 502.99 | 11.95 |
| -3 | 8 | -7  | 543.12 | 10.48 |
| -3 | 8 | -7  | 584.59 | 12.85 |
| -3 | 8 | -7  | 579.04 | 10.78 |
| -3 | 8 | -7  | 597.83 | 12.66 |
| -3 | 8 | -7  | 540.71 | 10.52 |
| -3 | 8 | -7  | 505.21 | 11.48 |
| -3 | 8 | -7  | 568.16 | 10.11 |
| -3 | 8 | -7  | 524.06 | 11.22 |
| -3 | 8 | -7  | 525.11 | 8.72  |

## CIF 31

|    |   |    |        |       |
|----|---|----|--------|-------|
| -3 | 8 | -6 | 132.43 | 4.41  |
| -3 | 8 | -6 | 127.71 | 5.66  |
| -3 | 8 | -6 | 143.70 | 4.87  |
| -3 | 8 | -6 | 146.46 | 5.71  |
| -3 | 8 | -6 | 144.89 | 5.40  |
| -3 | 8 | -6 | 150.71 | 4.77  |
| -3 | 8 | -6 | 126.31 | 5.59  |
| -3 | 8 | -6 | 133.74 | 4.57  |
| -3 | 8 | -6 | 127.69 | 3.79  |
| -3 | 8 | -5 | 108.47 | 3.75  |
| -3 | 8 | -5 | 95.78  | 4.02  |
| -3 | 8 | -5 | 98.53  | 4.62  |
| -3 | 8 | -5 | 98.61  | 3.82  |
| -3 | 8 | -5 | 87.11  | 3.68  |
| -3 | 8 | -5 | 91.40  | 4.52  |
| -3 | 8 | -5 | 94.00  | 4.41  |
| -3 | 8 | -5 | 103.56 | 3.27  |
| -3 | 8 | -4 | 169.05 | 4.46  |
| -3 | 8 | -4 | 173.68 | 6.11  |
| -3 | 8 | -4 | 167.79 | 6.01  |
| -3 | 8 | -4 | 182.27 | 5.07  |
| -3 | 8 | -4 | 166.63 | 4.84  |
| -3 | 8 | -4 | 176.82 | 4.86  |
| -3 | 8 | -4 | 151.46 | 5.19  |
| -3 | 8 | -4 | 160.30 | 5.78  |
| -3 | 8 | -3 | 41.71  | 2.06  |
| -3 | 8 | -3 | 42.10  | 2.45  |
| -3 | 8 | -3 | 28.30  | 2.50  |
| -3 | 8 | -3 | 28.99  | 2.19  |
| -3 | 8 | -3 | 35.23  | 2.68  |
| -3 | 8 | -3 | 27.13  | 2.54  |
| -3 | 8 | -3 | 33.14  | 2.10  |
| -3 | 8 | -3 | 33.66  | 2.31  |
| -3 | 8 | -3 | 29.19  | 2.60  |
| -3 | 8 | -3 | 31.80  | 2.52  |
| -3 | 8 | -2 | 551.62 | 10.11 |
| -3 | 8 | -2 | 540.13 | 11.14 |
| -3 | 8 | -2 | 534.94 | 9.52  |
| -3 | 8 | -2 | 532.46 | 10.00 |
| -3 | 8 | -2 | 556.11 | 9.33  |
| -3 | 8 | -2 | 498.36 | 10.21 |

## CIF 31

|    |   |    |        |       |
|----|---|----|--------|-------|
| -3 | 8 | -2 | 534.82 | 8.10  |
| -3 | 8 | -2 | 522.48 | 10.80 |
| -3 | 8 | -2 | 544.27 | 8.79  |
| -3 | 8 | -2 | 558.29 | 10.68 |
| -3 | 8 | -2 | 545.51 | 10.67 |
| -3 | 8 | -2 | 568.62 | 9.51  |
| -3 | 8 | -2 | 516.12 | 8.97  |
| -3 | 8 | -1 | 122.09 | 3.42  |
| -3 | 8 | -1 | 110.54 | 4.39  |
| -3 | 8 | -1 | 117.92 | 3.95  |
| -3 | 8 | -1 | 110.06 | 4.68  |
| -3 | 8 | -1 | 118.39 | 3.98  |
| -3 | 8 | -1 | 102.70 | 4.20  |
| -3 | 8 | -1 | 103.87 | 4.32  |
| -3 | 8 | -1 | 118.35 | 3.55  |
| -3 | 8 | -1 | 109.31 | 4.57  |
| -3 | 8 | -1 | 113.50 | 4.29  |
| -3 | 8 | -1 | 108.63 | 4.04  |
| -3 | 8 | 0  | 176.85 | 6.01  |
| -3 | 8 | 0  | 186.96 | 5.39  |
| -3 | 8 | 0  | 209.40 | 6.31  |
| -3 | 8 | 0  | 184.85 | 5.33  |
| -3 | 8 | 0  | 186.65 | 5.94  |
| -3 | 8 | 0  | 211.10 | 5.33  |
| -3 | 8 | 0  | 196.78 | 6.47  |
| -3 | 8 | 0  | 192.79 | 6.14  |
| -3 | 8 | 0  | 193.84 | 6.14  |
| -3 | 8 | 0  | 185.25 | 5.61  |
| -3 | 8 | 0  | 180.56 | 4.49  |
| -3 | 8 | 0  | 206.76 | 5.35  |
| -3 | 8 | 0  | 193.36 | 4.50  |
| -3 | 8 | 1  | 351.43 | 6.44  |
| -3 | 8 | 1  | 330.45 | 8.43  |
| -3 | 8 | 1  | 368.88 | 8.53  |
| -3 | 8 | 1  | 370.23 | 7.33  |
| -3 | 8 | 1  | 355.97 | 8.37  |
| -3 | 8 | 1  | 345.61 | 8.00  |
| -3 | 8 | 1  | 367.87 | 8.98  |
| -3 | 8 | 1  | 353.97 | 8.66  |
| -3 | 8 | 1  | 337.63 | 6.23  |
| -3 | 8 | 1  | 375.47 | 7.40  |

## CIF 31

|    |   |   |        |       |
|----|---|---|--------|-------|
| -3 | 8 | 1 | 352.47 | 8.29  |
| -3 | 8 | 2 | 914.57 | 14.96 |
| -3 | 8 | 2 | 835.46 | 14.04 |
| -3 | 8 | 2 | 982.16 | 12.29 |
| -3 | 8 | 2 | 933.89 | 13.00 |
| -3 | 8 | 2 | 850.04 | 13.92 |
| -3 | 8 | 2 | 874.76 | 14.90 |
| -3 | 8 | 2 | 922.84 | 14.53 |
| -3 | 8 | 2 | 834.16 | 14.65 |
| -3 | 8 | 2 | 909.41 | 11.44 |
| -3 | 8 | 2 | 904.96 | 14.87 |
| -3 | 8 | 2 | 824.25 | 12.51 |
| -3 | 8 | 2 | 873.52 | 14.50 |
| -3 | 8 | 3 | 12.77  | 1.65  |
| -3 | 8 | 3 | 13.53  | 1.83  |
| -3 | 8 | 3 | 14.75  | 1.63  |
| -3 | 8 | 3 | 11.94  | 1.81  |
| -3 | 8 | 3 | 15.98  | 1.44  |
| -3 | 8 | 3 | 15.88  | 2.17  |
| -3 | 8 | 3 | 12.38  | 1.15  |
| -3 | 8 | 3 | 16.40  | 2.16  |
| -3 | 8 | 3 | 11.97  | 1.89  |
| -3 | 8 | 3 | 13.16  | 1.52  |
| -3 | 8 | 4 | 659.41 | 12.95 |
| -3 | 8 | 4 | 649.47 | 11.69 |
| -3 | 8 | 4 | 698.08 | 13.02 |
| -3 | 8 | 4 | 672.12 | 12.97 |
| -3 | 8 | 4 | 697.67 | 10.98 |
| -3 | 8 | 4 | 656.44 | 12.05 |
| -3 | 8 | 4 | 593.39 | 12.32 |
| -3 | 8 | 4 | 637.64 | 9.94  |
| -3 | 8 | 4 | 629.69 | 12.06 |
| -3 | 8 | 4 | 689.48 | 11.02 |
| -3 | 8 | 4 | 624.65 | 12.61 |
| -3 | 8 | 5 | 2.24   | 1.58  |
| -3 | 8 | 5 | 2.76   | 1.46  |
| -3 | 8 | 5 | 2.33   | 0.97  |
| -3 | 8 | 5 | 2.31   | 0.83  |
| -3 | 8 | 5 | 3.46   | 1.57  |
| -3 | 8 | 5 | 1.85   | 1.38  |
| -3 | 8 | 5 | 2.14   | 1.05  |



## CIF 31

|    |   |     |        |      |
|----|---|-----|--------|------|
| -3 | 8 | 5   | 2.42   | 1.18 |
| -3 | 8 | 5   | 4.52   | 1.11 |
| -3 | 8 | 5   | 2.54   | 1.50 |
| -3 | 8 | 6   | 7.59   | 1.12 |
| -3 | 8 | 6   | 5.97   | 1.59 |
| -3 | 8 | 6   | 7.20   | 1.57 |
| -3 | 8 | 6   | 9.28   | 1.34 |
| -3 | 8 | 6   | 6.72   | 1.48 |
| -3 | 8 | 6   | 7.01   | 1.90 |
| -3 | 8 | 6   | 6.20   | 1.25 |
| -3 | 8 | 6   | 7.29   | 1.20 |
| -3 | 8 | 6   | 8.17   | 1.85 |
| -3 | 8 | 6   | 4.62   | 1.39 |
| -3 | 8 | 6   | 6.72   | 1.64 |
| -3 | 8 | 7   | 51.31  | 3.15 |
| -3 | 8 | 7   | 45.06  | 2.88 |
| -3 | 8 | 7   | 53.60  | 2.74 |
| -3 | 8 | 7   | 50.06  | 3.08 |
| -3 | 8 | 7   | 51.01  | 3.36 |
| -3 | 8 | 7   | 53.28  | 2.68 |
| -3 | 8 | 7   | 47.99  | 3.10 |
| -3 | 8 | 7   | 48.68  | 3.15 |
| -3 | 8 | 7   | 49.36  | 3.28 |
| -3 | 8 | 8   | 195.96 | 5.30 |
| -3 | 8 | 8   | 182.78 | 5.69 |
| -3 | 8 | 8   | 185.65 | 5.90 |
| -3 | 8 | 8   | 198.73 | 6.14 |
| -3 | 8 | 8   | 186.63 | 5.67 |
| -3 | 8 | 8   | 198.01 | 5.64 |
| -3 | 8 | 9   | 87.29  | 3.63 |
| -3 | 8 | 9   | 82.80  | 2.99 |
| -3 | 8 | 10  | 1.97   | 0.74 |
| -3 | 8 | 10  | 0.65   | 0.85 |
| -3 | 8 | 10  | 1.35   | 0.80 |
| -3 | 9 | -12 | 36.84  | 1.64 |
| -3 | 9 | -12 | 33.90  | 1.47 |
| -3 | 9 | -11 | 102.95 | 3.51 |
| -3 | 9 | -11 | 104.97 | 2.63 |
| -3 | 9 | -10 | 196.51 | 5.36 |
| -3 | 9 | -10 | 205.14 | 6.32 |
| -3 | 9 | -10 | 206.02 | 6.30 |

## CIF 31

|    |   |    |         |       |
|----|---|----|---------|-------|
| -3 | 9 | -9 | 31.43   | 2.33  |
| -3 | 9 | -9 | 26.73   | 2.14  |
| -3 | 9 | -9 | 34.58   | 3.00  |
| -3 | 9 | -9 | 33.18   | 2.55  |
| -3 | 9 | -9 | 30.31   | 2.78  |
| -3 | 9 | -9 | 36.07   | 3.10  |
| -3 | 9 | -9 | 28.07   | 1.73  |
| -3 | 9 | -8 | 360.90  | 7.98  |
| -3 | 9 | -8 | 361.36  | 8.12  |
| -3 | 9 | -8 | 350.03  | 8.82  |
| -3 | 9 | -8 | 371.76  | 10.07 |
| -3 | 9 | -8 | 373.39  | 9.91  |
| -3 | 9 | -8 | 382.90  | 6.71  |
| -3 | 9 | -7 | 2.50    | 1.45  |
| -3 | 9 | -7 | 0.42    | 1.09  |
| -3 | 9 | -7 | 4.23    | 1.76  |
| -3 | 9 | -7 | 2.23    | 1.68  |
| -3 | 9 | -7 | 0.23    | 1.18  |
| -3 | 9 | -7 | 0.24    | 0.88  |
| -3 | 9 | -7 | 4.23    | 1.68  |
| -3 | 9 | -7 | 0.56    | 1.18  |
| -3 | 9 | -7 | 0.38    | 0.73  |
| -3 | 9 | -6 | 131.46  | 4.62  |
| -3 | 9 | -6 | 167.58  | 6.33  |
| -3 | 9 | -6 | 140.90  | 4.70  |
| -3 | 9 | -6 | 157.12  | 5.84  |
| -3 | 9 | -6 | 163.10  | 4.11  |
| -3 | 9 | -6 | 163.42  | 4.72  |
| -3 | 9 | -5 | 215.06  | 5.96  |
| -3 | 9 | -5 | 221.80  | 7.11  |
| -3 | 9 | -5 | 220.25  | 7.31  |
| -3 | 9 | -5 | 210.32  | 5.78  |
| -3 | 9 | -5 | 201.28  | 6.13  |
| -3 | 9 | -5 | 202.35  | 4.62  |
| -3 | 9 | -5 | 208.16  | 5.20  |
| -3 | 9 | -4 | 838.51  | 14.36 |
| -3 | 9 | -4 | 925.46  | 15.89 |
| -3 | 9 | -4 | 892.38  | 15.81 |
| -3 | 9 | -4 | 944.99  | 13.72 |
| -3 | 9 | -4 | 860.97  | 13.65 |
| -3 | 9 | -4 | 1000.09 | 13.57 |

## CIF 31

|    |   |    |        |       |
|----|---|----|--------|-------|
| -3 | 9 | -4 | 869.60 | 15.37 |
| -3 | 9 | -4 | 878.07 | 11.87 |
| -3 | 9 | -4 | 892.54 | 11.41 |
| -3 | 9 | -3 | 183.32 | 5.37  |
| -3 | 9 | -3 | 182.84 | 6.27  |
| -3 | 9 | -3 | 199.46 | 6.96  |
| -3 | 9 | -3 | 172.30 | 5.52  |
| -3 | 9 | -3 | 157.00 | 4.70  |
| -3 | 9 | -3 | 185.49 | 5.55  |
| -3 | 9 | -3 | 172.63 | 6.18  |
| -3 | 9 | -3 | 187.66 | 6.26  |
| -3 | 9 | -2 | 12.21  | 1.77  |
| -3 | 9 | -2 | 14.78  | 2.02  |
| -3 | 9 | -2 | 11.17  | 1.50  |
| -3 | 9 | -2 | 12.51  | 1.55  |
| -3 | 9 | -2 | 14.34  | 2.18  |
| -3 | 9 | -2 | 15.71  | 2.24  |
| -3 | 9 | -2 | 14.04  | 2.29  |
| -3 | 9 | -2 | 11.88  | 1.83  |
| -3 | 9 | -2 | 13.58  | 1.78  |
| -3 | 9 | -2 | 9.60   | 1.28  |
| -3 | 9 | -2 | 12.11  | 1.64  |
| -3 | 9 | -1 | 241.77 | 7.09  |
| -3 | 9 | -1 | 251.64 | 6.31  |
| -3 | 9 | -1 | 241.53 | 7.47  |
| -3 | 9 | -1 | 225.82 | 6.53  |
| -3 | 9 | -1 | 241.34 | 7.07  |
| -3 | 9 | -1 | 240.00 | 5.54  |
| -3 | 9 | -1 | 231.03 | 5.96  |
| -3 | 9 | -1 | 234.48 | 7.34  |
| -3 | 9 | -1 | 243.45 | 6.73  |
| -3 | 9 | -1 | 241.39 | 6.44  |
| -3 | 9 | 0  | 144.40 | 5.65  |
| -3 | 9 | 0  | 141.16 | 5.64  |
| -3 | 9 | 0  | 141.70 | 5.92  |
| -3 | 9 | 0  | 159.16 | 5.78  |
| -3 | 9 | 0  | 134.30 | 4.75  |
| -3 | 9 | 0  | 146.79 | 5.64  |
| -3 | 9 | 0  | 138.49 | 4.07  |
| -3 | 9 | 0  | 150.85 | 4.18  |
| -3 | 9 | 0  | 134.86 | 5.55  |

## CIF 31

|    |   |   |        |       |
|----|---|---|--------|-------|
| -3 | 9 | 0 | 153.48 | 4.77  |
| -3 | 9 | 0 | 147.34 | 5.41  |
| -3 | 9 | 0 | 143.46 | 5.16  |
| -3 | 9 | 1 | 455.50 | 8.67  |
| -3 | 9 | 1 | 427.72 | 9.90  |
| -3 | 9 | 1 | 451.39 | 10.00 |
| -3 | 9 | 1 | 446.11 | 10.20 |
| -3 | 9 | 1 | 458.42 | 8.76  |
| -3 | 9 | 1 | 425.00 | 9.74  |
| -3 | 9 | 1 | 440.36 | 10.40 |
| -3 | 9 | 1 | 408.57 | 7.24  |
| -3 | 9 | 1 | 414.24 | 9.12  |
| -3 | 9 | 1 | 431.14 | 9.57  |
| -3 | 9 | 1 | 417.11 | 10.06 |
| -3 | 9 | 1 | 415.43 | 7.58  |
| -3 | 9 | 2 | 193.41 | 6.86  |
| -3 | 9 | 2 | 206.16 | 6.89  |
| -3 | 9 | 2 | 184.39 | 5.37  |
| -3 | 9 | 2 | 192.06 | 6.59  |
| -3 | 9 | 2 | 194.81 | 6.78  |
| -3 | 9 | 2 | 195.77 | 6.22  |
| -3 | 9 | 2 | 201.70 | 6.36  |
| -3 | 9 | 2 | 207.10 | 6.57  |
| -3 | 9 | 2 | 196.59 | 6.76  |
| -3 | 9 | 2 | 193.98 | 5.37  |
| -3 | 9 | 2 | 199.69 | 6.50  |
| -3 | 9 | 3 | 452.70 | 8.07  |
| -3 | 9 | 3 | 424.77 | 9.03  |
| -3 | 9 | 3 | 434.53 | 9.69  |
| -3 | 9 | 3 | 448.25 | 10.69 |
| -3 | 9 | 3 | 504.46 | 9.19  |
| -3 | 9 | 3 | 397.53 | 9.60  |
| -3 | 9 | 3 | 442.46 | 10.09 |
| -3 | 9 | 3 | 419.02 | 9.90  |
| -3 | 9 | 3 | 474.51 | 8.85  |
| -3 | 9 | 3 | 466.07 | 10.60 |
| -3 | 9 | 3 | 432.27 | 10.15 |
| -3 | 9 | 4 | 77.63  | 3.82  |
| -3 | 9 | 4 | 88.84  | 4.00  |
| -3 | 9 | 4 | 84.94  | 4.43  |
| -3 | 9 | 4 | 87.61  | 3.34  |

## CIF 31

|    |    |     |       |      |
|----|----|-----|-------|------|
| -3 | 9  | 4   | 87.29 | 4.54 |
| -3 | 9  | 4   | 90.59 | 3.65 |
| -3 | 9  | 4   | 89.66 | 4.51 |
| -3 | 9  | 4   | 80.80 | 4.31 |
| -3 | 9  | 4   | 78.07 | 4.06 |
| -3 | 9  | 4   | 81.26 | 3.49 |
| -3 | 9  | 4   | 89.69 | 4.58 |
| -3 | 9  | 5   | 14.44 | 2.08 |
| -3 | 9  | 5   | 10.63 | 1.83 |
| -3 | 9  | 5   | 11.15 | 2.01 |
| -3 | 9  | 5   | 10.83 | 1.79 |
| -3 | 9  | 5   | 13.12 | 1.51 |
| -3 | 9  | 5   | 10.25 | 1.57 |
| -3 | 9  | 5   | 10.94 | 1.49 |
| -3 | 9  | 5   | 13.14 | 1.44 |
| -3 | 9  | 5   | 10.37 | 1.95 |
| -3 | 9  | 5   | 11.50 | 1.96 |
| -3 | 9  | 6   | 75.43 | 3.76 |
| -3 | 9  | 6   | 65.26 | 3.47 |
| -3 | 9  | 6   | 73.61 | 3.94 |
| -3 | 9  | 6   | 77.55 | 3.91 |
| -3 | 9  | 6   | 74.38 | 3.86 |
| -3 | 9  | 6   | 72.09 | 3.68 |
| -3 | 9  | 7   | 17.57 | 1.63 |
| -3 | 9  | 7   | 19.88 | 2.03 |
| -3 | 9  | 7   | 22.31 | 2.17 |
| -3 | 9  | 7   | 19.55 | 1.85 |
| -3 | 9  | 7   | 17.32 | 1.72 |
| -3 | 9  | 7   | 21.36 | 2.02 |
| -3 | 9  | 7   | 18.12 | 1.91 |
| -3 | 9  | 8   | 5.01  | 1.19 |
| -3 | 9  | 8   | 5.14  | 1.26 |
| -3 | 9  | 8   | 4.98  | 1.04 |
| -3 | 9  | 9   | 4.82  | 0.97 |
| -3 | 9  | 9   | 5.90  | 0.85 |
| -3 | 10 | -12 | 2.61  | 0.51 |
| -3 | 10 | -12 | 2.59  | 0.42 |
| -3 | 10 | -11 | 21.97 | 1.28 |
| -3 | 10 | -10 | 5.83  | 0.94 |
| -3 | 10 | -10 | 6.90  | 1.44 |
| -3 | 10 | -10 | 7.28  | 1.45 |

## CIF 31

|    |    |    |         |       |
|----|----|----|---------|-------|
| -3 | 10 | -9 | 2.68    | 0.86  |
| -3 | 10 | -9 | 2.70    | 1.40  |
| -3 | 10 | -9 | 2.66    | 1.11  |
| -3 | 10 | -9 | 1.54    | 1.37  |
| -3 | 10 | -8 | 251.03  | 7.78  |
| -3 | 10 | -8 | 250.89  | 7.00  |
| -3 | 10 | -8 | 250.40  | 7.71  |
| -3 | 10 | -8 | 255.61  | 5.82  |
| -3 | 10 | -7 | 198.36  | 7.16  |
| -3 | 10 | -7 | 187.73  | 6.40  |
| -3 | 10 | -7 | 188.86  | 5.80  |
| -3 | 10 | -7 | 181.51  | 6.78  |
| -3 | 10 | -7 | 177.96  | 5.93  |
| -3 | 10 | -7 | 195.10  | 5.57  |
| -3 | 10 | -6 | 7.05    | 1.77  |
| -3 | 10 | -6 | 4.28    | 1.47  |
| -3 | 10 | -6 | 3.27    | 1.10  |
| -3 | 10 | -6 | 4.10    | 1.49  |
| -3 | 10 | -5 | 58.60   | 3.92  |
| -3 | 10 | -5 | 57.30   | 3.75  |
| -3 | 10 | -5 | 48.07   | 2.78  |
| -3 | 10 | -5 | 47.22   | 3.53  |
| -3 | 10 | -5 | 51.66   | 3.14  |
| -3 | 10 | -4 | 125.68  | 5.64  |
| -3 | 10 | -4 | 147.54  | 4.89  |
| -3 | 10 | -4 | 123.02  | 4.71  |
| -3 | 10 | -4 | 109.27  | 5.01  |
| -3 | 10 | -4 | 142.07  | 4.59  |
| -3 | 10 | -4 | 132.14  | 5.66  |
| -3 | 10 | -4 | 124.93  | 5.04  |
| -3 | 10 | -3 | 185.97  | 6.94  |
| -3 | 10 | -3 | 175.64  | 5.35  |
| -3 | 10 | -3 | 177.25  | 5.52  |
| -3 | 10 | -3 | 181.84  | 6.02  |
| -3 | 10 | -3 | 159.05  | 5.91  |
| -3 | 10 | -3 | 172.42  | 5.53  |
| -3 | 10 | -3 | 167.70  | 4.90  |
| -3 | 10 | -3 | 182.21  | 6.31  |
| -3 | 10 | -3 | 178.95  | 6.23  |
| -3 | 10 | -2 | 1580.98 | 21.62 |
| -3 | 10 | -2 | 1528.59 | 21.96 |

## CIF 31

|    |    |    |         |       |
|----|----|----|---------|-------|
| -3 | 10 | -2 | 1570.23 | 19.60 |
| -3 | 10 | -2 | 1541.71 | 20.50 |
| -3 | 10 | -2 | 1540.07 | 18.32 |
| -3 | 10 | -2 | 1530.54 | 21.48 |
| -3 | 10 | -2 | 1551.62 | 19.59 |
| -3 | 10 | -1 | 1031.80 | 14.87 |
| -3 | 10 | -1 | 1021.86 | 17.63 |
| -3 | 10 | -1 | 1068.59 | 17.29 |
| -3 | 10 | -1 | 1016.39 | 16.00 |
| -3 | 10 | -1 | 1013.78 | 16.16 |
| -3 | 10 | -1 | 1012.28 | 13.48 |
| -3 | 10 | -1 | 1001.79 | 16.80 |
| -3 | 10 | -1 | 1028.45 | 15.53 |
| -3 | 10 | -1 | 991.21  | 14.82 |
| -3 | 10 | 0  | 6.49    | 1.72  |
| -3 | 10 | 0  | 3.36    | 1.28  |
| -3 | 10 | 0  | 3.28    | 1.34  |
| -3 | 10 | 0  | 6.74    | 1.87  |
| -3 | 10 | 0  | 2.84    | 1.04  |
| -3 | 10 | 0  | 1.71    | 1.62  |
| -3 | 10 | 0  | 4.03    | 1.61  |
| -3 | 10 | 0  | 6.08    | 1.60  |
| -3 | 10 | 0  | 8.00    | 1.74  |
| -3 | 10 | 0  | 1.26    | 1.34  |
| -3 | 10 | 0  | 2.32    | 0.89  |
| -3 | 10 | 0  | 4.46    | 1.36  |
| -3 | 10 | 1  | 5.45    | 1.81  |
| -3 | 10 | 1  | 3.97    | 1.59  |
| -3 | 10 | 1  | 4.30    | 1.39  |
| -3 | 10 | 1  | 5.06    | 1.64  |
| -3 | 10 | 1  | 4.98    | 1.20  |
| -3 | 10 | 1  | 5.20    | 1.54  |
| -3 | 10 | 1  | 4.01    | 1.30  |
| -3 | 10 | 1  | 3.83    | 1.51  |
| -3 | 10 | 1  | 6.05    | 1.16  |
| -3 | 10 | 1  | 3.41    | 1.56  |
| -3 | 10 | 1  | 4.11    | 1.40  |
| -3 | 10 | 1  | 5.32    | 1.78  |
| -3 | 10 | 2  | 26.23   | 2.69  |
| -3 | 10 | 2  | 26.13   | 2.08  |
| -3 | 10 | 2  | 24.33   | 2.28  |

## CIF 31

|    |    |   |        |      |
|----|----|---|--------|------|
| -3 | 10 | 2 | 21.61  | 2.41 |
| -3 | 10 | 2 | 24.98  | 2.14 |
| -3 | 10 | 2 | 26.73  | 2.35 |
| -3 | 10 | 2 | 25.36  | 2.42 |
| -3 | 10 | 2 | 24.69  | 2.64 |
| -3 | 10 | 2 | 22.72  | 2.47 |
| -3 | 10 | 2 | 24.89  | 1.95 |
| -3 | 10 | 2 | 30.50  | 2.77 |
| -3 | 10 | 2 | 27.00  | 2.47 |
| -3 | 10 | 3 | 84.42  | 3.90 |
| -3 | 10 | 3 | 80.86  | 4.26 |
| -3 | 10 | 3 | 90.22  | 3.65 |
| -3 | 10 | 3 | 71.74  | 3.73 |
| -3 | 10 | 3 | 81.32  | 3.71 |
| -3 | 10 | 3 | 75.50  | 3.82 |
| -3 | 10 | 3 | 72.87  | 4.22 |
| -3 | 10 | 3 | 78.57  | 4.02 |
| -3 | 10 | 3 | 76.66  | 3.19 |
| -3 | 10 | 3 | 90.51  | 4.39 |
| -3 | 10 | 3 | 82.34  | 4.13 |
| -3 | 10 | 4 | 42.61  | 3.02 |
| -3 | 10 | 4 | 43.64  | 2.87 |
| -3 | 10 | 4 | 50.31  | 3.31 |
| -3 | 10 | 4 | 49.06  | 2.96 |
| -3 | 10 | 4 | 42.65  | 3.07 |
| -3 | 10 | 4 | 47.85  | 3.06 |
| -3 | 10 | 4 | 48.88  | 3.24 |
| -3 | 10 | 4 | 47.54  | 2.74 |
| -3 | 10 | 4 | 45.61  | 3.08 |
| -3 | 10 | 5 | 3.29   | 1.18 |
| -3 | 10 | 5 | 2.25   | 1.25 |
| -3 | 10 | 5 | 3.82   | 1.19 |
| -3 | 10 | 5 | 1.94   | 1.15 |
| -3 | 10 | 5 | 2.96   | 1.21 |
| -3 | 10 | 5 | 3.41   | 1.17 |
| -3 | 10 | 5 | 2.56   | 0.86 |
| -3 | 10 | 5 | 3.58   | 1.24 |
| -3 | 10 | 6 | 130.38 | 4.21 |
| -3 | 10 | 6 | 130.13 | 4.17 |
| -3 | 10 | 6 | 126.63 | 4.11 |
| -3 | 10 | 6 | 126.97 | 4.33 |



## CIF 31

|    |    |     |        |      |
|----|----|-----|--------|------|
| -3 | 10 | 6   | 117.86 | 4.04 |
| -3 | 10 | 6   | 138.47 | 4.46 |
| -3 | 10 | 7   | 26.61  | 1.72 |
| -3 | 10 | 7   | 24.50  | 1.74 |
| -3 | 10 | 7   | 24.79  | 1.70 |
| -3 | 10 | 7   | 22.62  | 1.46 |
| -3 | 10 | 7   | 25.06  | 1.70 |
| -3 | 11 | -11 | 47.05  | 1.48 |
| -3 | 11 | -11 | 39.51  | 1.29 |
| -3 | 11 | -10 | 0.98   | 0.82 |
| -3 | 11 | -10 | 1.13   | 0.81 |
| -3 | 11 | -9  | 1.29   | 1.10 |
| -3 | 11 | -9  | 1.34   | 0.82 |
| -3 | 11 | -9  | 1.75   | 1.11 |
| -3 | 11 | -8  | 19.90  | 2.26 |
| -3 | 11 | -8  | 16.73  | 1.85 |
| -3 | 11 | -8  | 20.11  | 2.23 |
| -3 | 11 | -8  | 20.03  | 1.55 |
| -3 | 11 | -7  | 297.34 | 7.52 |
| -3 | 11 | -7  | 300.57 | 6.71 |
| -3 | 11 | -7  | 284.69 | 7.04 |
| -3 | 11 | -6  | 282.43 | 7.78 |
| -3 | 11 | -6  | 277.04 | 7.14 |
| -3 | 11 | -6  | 284.02 | 8.08 |
| -3 | 11 | -6  | 270.55 | 7.43 |
| -3 | 11 | -6  | 254.43 | 7.90 |
| -3 | 11 | -5  | 8.49   | 1.94 |
| -3 | 11 | -5  | 6.86   | 1.83 |
| -3 | 11 | -5  | 6.88   | 1.81 |
| -3 | 11 | -5  | 8.33   | 1.93 |
| -3 | 11 | -5  | 7.09   | 1.24 |
| -3 | 11 | -5  | 6.45   | 1.33 |
| -3 | 11 | -4  | 116.49 | 5.25 |
| -3 | 11 | -4  | 121.29 | 4.31 |
| -3 | 11 | -4  | 119.80 | 4.39 |
| -3 | 11 | -4  | 129.40 | 5.51 |
| -3 | 11 | -4  | 127.33 | 5.50 |
| -3 | 11 | -4  | 123.95 | 5.40 |
| -3 | 11 | -4  | 113.39 | 4.65 |
| -3 | 11 | -3  | 13.34  | 1.57 |
| -3 | 11 | -3  | 9.38   | 1.79 |

## CIF 31

|    |    |    |         |       |
|----|----|----|---------|-------|
| -3 | 11 | -3 | 8.36    | 2.09  |
| -3 | 11 | -3 | 7.26    | 1.55  |
| -3 | 11 | -3 | 8.04    | 1.15  |
| -3 | 11 | -3 | 8.48    | 1.60  |
| -3 | 11 | -2 | 133.44  | 4.52  |
| -3 | 11 | -2 | 129.10  | 4.65  |
| -3 | 11 | -2 | 118.87  | 4.88  |
| -3 | 11 | -2 | 125.89  | 5.14  |
| -3 | 11 | -2 | 125.25  | 5.37  |
| -3 | 11 | -2 | 119.14  | 4.92  |
| -3 | 11 | -2 | 121.65  | 4.63  |
| -3 | 11 | -2 | 131.35  | 5.19  |
| -3 | 11 | -2 | 132.44  | 4.32  |
| -3 | 11 | -1 | 17.53   | 1.75  |
| -3 | 11 | -1 | 15.86   | 1.87  |
| -3 | 11 | -1 | 15.27   | 2.17  |
| -3 | 11 | -1 | 14.92   | 1.79  |
| -3 | 11 | -1 | 15.78   | 2.39  |
| -3 | 11 | -1 | 16.50   | 2.19  |
| -3 | 11 | -1 | 16.03   | 1.93  |
| -3 | 11 | -1 | 17.44   | 1.92  |
| -3 | 11 | -1 | 17.22   | 1.95  |
| -3 | 11 | -1 | 15.74   | 2.11  |
| -3 | 11 | 0  | 130.51  | 5.30  |
| -3 | 11 | 0  | 123.96  | 4.97  |
| -3 | 11 | 0  | 118.07  | 5.21  |
| -3 | 11 | 0  | 128.82  | 5.12  |
| -3 | 11 | 0  | 132.25  | 4.97  |
| -3 | 11 | 0  | 127.39  | 4.72  |
| -3 | 11 | 0  | 124.30  | 4.93  |
| -3 | 11 | 0  | 123.14  | 5.07  |
| -3 | 11 | 0  | 129.48  | 4.36  |
| -3 | 11 | 1  | 1201.52 | 17.66 |
| -3 | 11 | 1  | 1138.92 | 16.35 |
| -3 | 11 | 1  | 1170.96 | 17.62 |
| -3 | 11 | 1  | 1167.23 | 17.15 |
| -3 | 11 | 1  | 1266.89 | 17.37 |
| -3 | 11 | 1  | 1085.62 | 16.70 |
| -3 | 11 | 1  | 1085.59 | 16.85 |
| -3 | 11 | 1  | 1231.95 | 16.86 |
| -3 | 11 | 1  | 1146.12 | 16.06 |

## CIF 31

|    |    |    |        |      |
|----|----|----|--------|------|
| -3 | 11 | 2  | 13.84  | 1.80 |
| -3 | 11 | 2  | 14.37  | 1.84 |
| -3 | 11 | 2  | 11.47  | 1.49 |
| -3 | 11 | 2  | 11.17  | 1.67 |
| -3 | 11 | 2  | 14.88  | 1.98 |
| -3 | 11 | 2  | 11.40  | 1.48 |
| -3 | 11 | 2  | 11.80  | 1.77 |
| -3 | 11 | 2  | 15.38  | 1.91 |
| -3 | 11 | 2  | 11.03  | 1.59 |
| -3 | 11 | 3  | 53.32  | 2.98 |
| -3 | 11 | 3  | 45.46  | 2.90 |
| -3 | 11 | 3  | 42.65  | 2.46 |
| -3 | 11 | 3  | 48.43  | 2.92 |
| -3 | 11 | 3  | 43.84  | 2.83 |
| -3 | 11 | 3  | 39.96  | 2.56 |
| -3 | 11 | 3  | 46.99  | 2.79 |
| -3 | 11 | 4  | 92.94  | 3.64 |
| -3 | 11 | 4  | 89.52  | 3.04 |
| -3 | 11 | 4  | 91.97  | 3.38 |
| -3 | 11 | 4  | 87.01  | 3.56 |
| -3 | 11 | 4  | 101.57 | 3.78 |
| -3 | 11 | 5  | 119.68 | 3.50 |
| -3 | 11 | 6  | 103.99 | 2.83 |
| -3 | 12 | -9 | 1.12   | 0.74 |
| -3 | 12 | -9 | 1.94   | 0.76 |
| -3 | 12 | -8 | 78.25  | 3.33 |
| -3 | 12 | -8 | 74.96  | 2.79 |
| -3 | 12 | -8 | 75.77  | 3.27 |
| -3 | 12 | -7 | 23.60  | 1.91 |
| -3 | 12 | -7 | 20.15  | 2.00 |
| -3 | 12 | -7 | 19.56  | 1.64 |
| -3 | 12 | -7 | 18.15  | 1.27 |
| -3 | 12 | -6 | 24.87  | 2.17 |
| -3 | 12 | -6 | 23.08  | 2.20 |
| -3 | 12 | -6 | 24.87  | 1.89 |
| -3 | 12 | -6 | 25.11  | 2.19 |
| -3 | 12 | -6 | 23.27  | 2.09 |
| -3 | 12 | -5 | 143.84 | 5.17 |
| -3 | 12 | -5 | 159.41 | 5.31 |
| -3 | 12 | -5 | 156.63 | 4.87 |
| -3 | 12 | -5 | 156.12 | 5.21 |

## CIF 31

|    |    |    |        |      |
|----|----|----|--------|------|
| -3 | 12 | -5 | 150.05 | 5.18 |
| -3 | 12 | -4 | 1.66   | 0.78 |
| -3 | 12 | -4 | 1.68   | 1.13 |
| -3 | 12 | -4 | 0.74   | 1.21 |
| -3 | 12 | -4 | 1.89   | 1.11 |
| -3 | 12 | -4 | 1.46   | 0.89 |
| -3 | 12 | -3 | 208.72 | 5.76 |
| -3 | 12 | -3 | 222.81 | 5.63 |
| -3 | 12 | -3 | 216.73 | 5.98 |
| -3 | 12 | -3 | 224.79 | 6.81 |
| -3 | 12 | -3 | 227.58 | 6.45 |
| -3 | 12 | -3 | 223.42 | 5.97 |
| -3 | 12 | -2 | 40.35  | 2.62 |
| -3 | 12 | -2 | 34.62  | 2.27 |
| -3 | 12 | -2 | 40.42  | 2.77 |
| -3 | 12 | -2 | 32.71  | 2.13 |
| -3 | 12 | -2 | 31.16  | 2.73 |
| -3 | 12 | -2 | 35.13  | 2.45 |
| -3 | 12 | -1 | 19.52  | 1.98 |
| -3 | 12 | -1 | 19.48  | 1.51 |
| -3 | 12 | -1 | 19.76  | 1.98 |
| -3 | 12 | -1 | 18.36  | 2.06 |
| -3 | 12 | -1 | 18.21  | 1.68 |
| -3 | 12 | -1 | 18.18  | 1.84 |
| -3 | 12 | 0  | -0.04  | 1.02 |
| -3 | 12 | 0  | 0.84   | 0.89 |
| -3 | 12 | 0  | 0.86   | 1.10 |
| -3 | 12 | 0  | 0.04   | 0.84 |
| -3 | 12 | 0  | 0.35   | 0.76 |
| -3 | 12 | 0  | 0.38   | 0.83 |
| -3 | 12 | 1  | 90.24  | 3.65 |
| -3 | 12 | 1  | 88.23  | 3.47 |
| -3 | 12 | 1  | 97.50  | 3.39 |
| -3 | 12 | 2  | 8.48   | 1.24 |
| -3 | 12 | 3  | 238.92 | 5.09 |
| -3 | 12 | 3  | 244.38 | 4.91 |
| -3 | 13 | -6 | 50.44  | 2.17 |
| -3 | 13 | -6 | 49.10  | 2.09 |
| -3 | 13 | -6 | 49.24  | 2.04 |
| -3 | 13 | -6 | 53.55  | 1.65 |
| -3 | 13 | -5 | 5.31   | 0.84 |

## CIF 31

|    |     |    |        |      |
|----|-----|----|--------|------|
| -3 | 13  | -5 | 5.32   | 0.90 |
| -3 | 13  | -5 | 7.60   | 1.11 |
| -3 | 13  | -5 | 6.60   | 0.91 |
| -3 | 13  | -5 | 7.65   | 1.11 |
| -3 | 13  | -5 | 7.38   | 0.77 |
| -3 | 13  | -4 | 79.78  | 2.77 |
| -3 | 13  | -4 | 81.87  | 3.12 |
| -3 | 13  | -3 | 118.28 | 3.61 |
| -3 | 13  | -3 | 118.52 | 3.61 |
| -3 | 13  | -2 | 10.42  | 1.06 |
| -3 | 13  | -2 | 10.27  | 1.18 |
| -3 | 13  | -2 | 12.49  | 1.34 |
| -3 | 13  | -2 | 11.67  | 1.40 |
| -3 | 13  | -1 | 56.46  | 2.18 |
| -3 | 13  | -1 | 55.92  | 2.39 |
| -3 | 13  | 0  | 64.78  | 2.27 |
| -3 | 13  | 0  | 71.38  | 2.44 |
| -2 | -11 | 0  | 53.24  | 1.56 |
| -2 | -11 | 1  | 45.80  | 1.41 |
| -2 | -11 | 2  | 206.36 | 3.51 |
| -2 | -11 | 2  | 186.25 | 3.52 |
| -2 | -11 | 3  | 14.33  | 1.11 |
| -2 | -11 | 3  | 15.53  | 1.07 |
| -2 | -11 | 4  | 17.87  | 1.22 |
| -2 | -11 | 4  | 18.80  | 1.20 |
| -2 | -11 | 5  | 38.52  | 1.69 |
| -2 | -11 | 6  | 32.77  | 1.51 |
| -2 | -11 | 6  | 23.74  | 1.56 |
| -2 | -11 | 7  | 153.47 | 3.06 |
| -2 | -11 | 7  | 142.56 | 3.54 |
| -2 | -11 | 8  | 54.26  | 1.56 |
| -2 | -11 | 8  | 51.85  | 2.03 |
| -2 | -11 | 9  | 17.16  | 1.11 |
| -2 | -10 | -3 | 25.09  | 0.96 |
| -2 | -10 | -2 | 4.65   | 0.72 |
| -2 | -10 | -1 | 12.07  | 1.12 |
| -2 | -10 | -1 | 11.43  | 0.90 |
| -2 | -10 | 0  | 28.66  | 1.70 |
| -2 | -10 | 0  | 27.66  | 1.34 |
| -2 | -10 | 0  | 27.80  | 1.51 |
| -2 | -10 | 1  | 66.29  | 2.35 |

## CIF 31

|    |     |    |        |      |
|----|-----|----|--------|------|
| -2 | -10 | 2  | 86.96  | 3.13 |
| -2 | -10 | 2  | 87.11  | 3.28 |
| -2 | -10 | 3  | 30.15  | 2.18 |
| -2 | -10 | 3  | 35.39  | 1.98 |
| -2 | -10 | 3  | 28.35  | 2.01 |
| -2 | -10 | 4  | 19.61  | 1.71 |
| -2 | -10 | 4  | 16.03  | 1.71 |
| -2 | -10 | 4  | 20.70  | 1.91 |
| -2 | -10 | 4  | 24.95  | 1.70 |
| -2 | -10 | 4  | 18.22  | 1.34 |
| -2 | -10 | 4  | 21.37  | 1.86 |
| -2 | -10 | 5  | 52.74  | 2.76 |
| -2 | -10 | 5  | 52.73  | 2.86 |
| -2 | -10 | 5  | 49.72  | 2.19 |
| -2 | -10 | 5  | 50.31  | 2.59 |
| -2 | -10 | 5  | 53.94  | 2.80 |
| -2 | -10 | 6  | 118.01 | 3.95 |
| -2 | -10 | 6  | 118.36 | 4.12 |
| -2 | -10 | 6  | 116.89 | 3.38 |
| -2 | -10 | 6  | 121.70 | 3.94 |
| -2 | -10 | 6  | 121.62 | 4.13 |
| -2 | -10 | 6  | 111.94 | 3.72 |
| -2 | -10 | 7  | 1.42   | 0.69 |
| -2 | -10 | 7  | 1.84   | 0.75 |
| -2 | -10 | 7  | 0.46   | 0.80 |
| -2 | -10 | 7  | 1.36   | 0.76 |
| -2 | -10 | 7  | 1.29   | 1.01 |
| -2 | -10 | 7  | 1.09   | 0.92 |
| -2 | -10 | 7  | 0.38   | 0.71 |
| -2 | -10 | 8  | 9.14   | 1.14 |
| -2 | -10 | 8  | 8.05   | 1.28 |
| -2 | -10 | 8  | 9.51   | 1.06 |
| -2 | -10 | 8  | 9.15   | 1.19 |
| -2 | -10 | 8  | 12.43  | 1.43 |
| -2 | -10 | 9  | 260.90 | 4.97 |
| -2 | -10 | 9  | 269.04 | 4.35 |
| -2 | -10 | 9  | 291.06 | 5.79 |
| -2 | -10 | 9  | 266.20 | 4.88 |
| -2 | -10 | 9  | 282.24 | 5.62 |
| -2 | -10 | 9  | 290.35 | 5.85 |
| -2 | -10 | 10 | 149.02 | 3.66 |

## CIF 31

|    |     |    |        |      |
|----|-----|----|--------|------|
| -2 | -10 | 10 | 156.70 | 3.88 |
| -2 | -10 | 11 | 76.02  | 2.13 |
| -2 | -10 | 11 | 80.53  | 2.46 |
| -2 | -9  | -5 | 25.50  | 0.93 |
| -2 | -9  | -4 | 22.88  | 1.23 |
| -2 | -9  | -4 | 20.48  | 1.09 |
| -2 | -9  | -3 | 65.63  | 2.39 |
| -2 | -9  | -3 | 62.38  | 2.03 |
| -2 | -9  | -2 | 137.74 | 3.26 |
| -2 | -9  | -2 | 145.23 | 3.44 |
| -2 | -9  | -1 | 33.68  | 2.10 |
| -2 | -9  | -1 | 31.19  | 1.56 |
| -2 | -9  | -1 | 33.14  | 1.66 |
| -2 | -9  | -1 | 35.40  | 1.94 |
| -2 | -9  | 0  | 1.28   | 0.68 |
| -2 | -9  | 0  | 1.82   | 1.09 |
| -2 | -9  | 1  | 24.64  | 2.00 |
| -2 | -9  | 1  | 31.61  | 1.98 |
| -2 | -9  | 1  | 27.06  | 2.02 |
| -2 | -9  | 2  | 376.69 | 7.05 |
| -2 | -9  | 2  | 347.64 | 7.64 |
| -2 | -9  | 2  | 367.04 | 8.44 |
| -2 | -9  | 2  | 338.83 | 6.58 |
| -2 | -9  | 2  | 352.03 | 7.79 |
| -2 | -9  | 3  | 319.60 | 7.81 |
| -2 | -9  | 3  | 331.91 | 8.05 |
| -2 | -9  | 3  | 314.02 | 7.66 |
| -2 | -9  | 3  | 329.53 | 6.66 |
| -2 | -9  | 3  | 316.49 | 6.41 |
| -2 | -9  | 3  | 316.15 | 7.27 |
| -2 | -9  | 3  | 337.96 | 7.59 |
| -2 | -9  | 4  | 412.24 | 8.80 |
| -2 | -9  | 4  | 374.80 | 8.47 |
| -2 | -9  | 4  | 409.57 | 8.91 |
| -2 | -9  | 4  | 390.98 | 7.38 |
| -2 | -9  | 4  | 389.62 | 8.15 |
| -2 | -9  | 4  | 406.68 | 8.28 |
| -2 | -9  | 4  | 417.86 | 8.63 |
| -2 | -9  | 5  | 62.77  | 2.84 |
| -2 | -9  | 5  | 61.32  | 3.33 |
| -2 | -9  | 5  | 64.80  | 3.35 |

## CIF 31

|    |    |    |        |       |
|----|----|----|--------|-------|
| -2 | -9 | 5  | 65.26  | 3.50  |
| -2 | -9 | 5  | 64.86  | 2.88  |
| -2 | -9 | 5  | 56.23  | 3.00  |
| -2 | -9 | 5  | 64.74  | 3.25  |
| -2 | -9 | 6  | 260.91 | 6.75  |
| -2 | -9 | 6  | 253.34 | 6.74  |
| -2 | -9 | 6  | 273.16 | 5.90  |
| -2 | -9 | 6  | 238.47 | 5.66  |
| -2 | -9 | 6  | 217.33 | 5.97  |
| -2 | -9 | 6  | 252.19 | 6.53  |
| -2 | -9 | 6  | 242.24 | 6.38  |
| -2 | -9 | 6  | 249.71 | 5.68  |
| -2 | -9 | 6  | 253.03 | 6.48  |
| -2 | -9 | 7  | 29.44  | 2.27  |
| -2 | -9 | 7  | 27.24  | 2.33  |
| -2 | -9 | 7  | 28.27  | 1.86  |
| -2 | -9 | 7  | 27.98  | 2.25  |
| -2 | -9 | 7  | 27.97  | 2.00  |
| -2 | -9 | 7  | 27.00  | 2.18  |
| -2 | -9 | 7  | 28.07  | 1.87  |
| -2 | -9 | 7  | 25.81  | 1.91  |
| -2 | -9 | 8  | 311.66 | 7.22  |
| -2 | -9 | 8  | 305.14 | 5.80  |
| -2 | -9 | 8  | 276.68 | 5.86  |
| -2 | -9 | 8  | 294.43 | 6.26  |
| -2 | -9 | 8  | 293.55 | 6.77  |
| -2 | -9 | 8  | 305.60 | 6.96  |
| -2 | -9 | 8  | 299.54 | 6.47  |
| -2 | -9 | 8  | 277.88 | 6.65  |
| -2 | -9 | 9  | 619.44 | 9.63  |
| -2 | -9 | 9  | 598.51 | 8.29  |
| -2 | -9 | 9  | 605.21 | 10.39 |
| -2 | -9 | 9  | 653.81 | 10.45 |
| -2 | -9 | 9  | 647.95 | 9.29  |
| -2 | -9 | 9  | 617.19 | 9.54  |
| -2 | -9 | 9  | 632.07 | 9.93  |
| -2 | -9 | 9  | 557.80 | 9.77  |
| -2 | -9 | 10 | 6.32   | 0.98  |
| -2 | -9 | 10 | 9.50   | 1.43  |
| -2 | -9 | 10 | 7.89   | 1.11  |
| -2 | -9 | 10 | 8.52   | 1.26  |



## CIF 31

|    |    |    |        |      |
|----|----|----|--------|------|
| -2 | -9 | 10 | 7.01   | 1.31 |
| -2 | -9 | 10 | 7.76   | 1.16 |
| -2 | -9 | 11 | 147.64 | 4.08 |
| -2 | -9 | 11 | 144.89 | 4.04 |
| -2 | -9 | 11 | 141.10 | 3.46 |
| -2 | -9 | 11 | 141.90 | 3.69 |
| -2 | -9 | 11 | 153.35 | 4.16 |
| -2 | -9 | 12 | 6.94   | 0.77 |
| -2 | -9 | 12 | 6.57   | 0.95 |
| -2 | -9 | 12 | 9.18   | 1.10 |
| -2 | -9 | 12 | 7.47   | 0.89 |
| -2 | -9 | 13 | 226.50 | 3.65 |
| -2 | -9 | 13 | 275.37 | 4.43 |
| -2 | -8 | -6 | 5.09   | 0.51 |
| -2 | -8 | -6 | 5.27   | 0.74 |
| -2 | -8 | -5 | 32.18  | 1.62 |
| -2 | -8 | -5 | 30.28  | 1.31 |
| -2 | -8 | -5 | 32.85  | 1.72 |
| -2 | -8 | -4 | 286.42 | 5.60 |
| -2 | -8 | -4 | 296.36 | 5.60 |
| -2 | -8 | -3 | 345.96 | 6.79 |
| -2 | -8 | -3 | 333.09 | 5.46 |
| -2 | -8 | -3 | 342.21 | 6.36 |
| -2 | -8 | -3 | 342.37 | 5.97 |
| -2 | -8 | -2 | 42.12  | 2.45 |
| -2 | -8 | -2 | 37.56  | 2.11 |
| -2 | -8 | -2 | 38.22  | 1.81 |
| -2 | -8 | -2 | 44.52  | 2.40 |
| -2 | -8 | -2 | 40.75  | 2.47 |
| -2 | -8 | -2 | 39.98  | 2.15 |
| -2 | -8 | -1 | 17.39  | 1.79 |
| -2 | -8 | -1 | 16.68  | 1.46 |
| -2 | -8 | -1 | 16.29  | 1.39 |
| -2 | -8 | -1 | 15.05  | 1.67 |
| -2 | -8 | -1 | 17.39  | 1.61 |
| -2 | -8 | 0  | 148.78 | 4.93 |
| -2 | -8 | 0  | 162.78 | 5.73 |
| -2 | -8 | 0  | 161.74 | 4.42 |
| -2 | -8 | 0  | 158.22 | 3.99 |
| -2 | -8 | 1  | 0.28   | 0.85 |
| -2 | -8 | 1  | 1.36   | 1.22 |

## CIF 31

|    |    |   |        |      |
|----|----|---|--------|------|
| -2 | -8 | 1 | 1.77   | 1.09 |
| -2 | -8 | 1 | 2.23   | 0.90 |
| -2 | -8 | 1 | 1.41   | 0.92 |
| -2 | -8 | 1 | 3.02   | 1.42 |
| -2 | -8 | 2 | 0.48   | 0.80 |
| -2 | -8 | 2 | 2.07   | 0.96 |
| -2 | -8 | 2 | 0.06   | 1.28 |
| -2 | -8 | 2 | 1.06   | 1.31 |
| -2 | -8 | 2 | 2.17   | 1.31 |
| -2 | -8 | 2 | 0.69   | 0.81 |
| -2 | -8 | 2 | 1.53   | 1.07 |
| -2 | -8 | 2 | 1.31   | 1.11 |
| -2 | -8 | 2 | 0.56   | 0.82 |
| -2 | -8 | 3 | 235.24 | 6.90 |
| -2 | -8 | 3 | 232.58 | 6.77 |
| -2 | -8 | 3 | 236.60 | 6.76 |
| -2 | -8 | 3 | 241.52 | 5.80 |
| -2 | -8 | 3 | 235.79 | 5.65 |
| -2 | -8 | 3 | 220.53 | 5.76 |
| -2 | -8 | 3 | 224.77 | 6.18 |
| -2 | -8 | 3 | 237.84 | 6.47 |
| -2 | -8 | 3 | 232.58 | 6.21 |
| -2 | -8 | 4 | 152.65 | 5.42 |
| -2 | -8 | 4 | 136.27 | 5.14 |
| -2 | -8 | 4 | 146.26 | 5.29 |
| -2 | -8 | 4 | 141.11 | 4.34 |
| -2 | -8 | 4 | 136.68 | 4.74 |
| -2 | -8 | 4 | 148.78 | 5.03 |
| -2 | -8 | 4 | 134.24 | 4.04 |
| -2 | -8 | 4 | 135.58 | 4.78 |
| -2 | -8 | 5 | 207.35 | 5.27 |
| -2 | -8 | 5 | 211.75 | 6.24 |
| -2 | -8 | 5 | 213.14 | 6.38 |
| -2 | -8 | 5 | 209.40 | 5.35 |
| -2 | -8 | 5 | 204.56 | 5.41 |
| -2 | -8 | 5 | 208.12 | 5.88 |
| -2 | -8 | 5 | 212.32 | 6.06 |
| -2 | -8 | 5 | 215.85 | 5.44 |
| -2 | -8 | 5 | 220.97 | 6.19 |
| -2 | -8 | 6 | 365.07 | 7.25 |
| -2 | -8 | 6 | 395.34 | 8.65 |

## CIF 31

|    |    |    |        |      |
|----|----|----|--------|------|
| -2 | -8 | 6  | 346.82 | 8.14 |
| -2 | -8 | 6  | 394.54 | 8.75 |
| -2 | -8 | 6  | 376.05 | 7.29 |
| -2 | -8 | 6  | 365.01 | 7.52 |
| -2 | -8 | 6  | 353.78 | 7.98 |
| -2 | -8 | 6  | 376.02 | 8.28 |
| -2 | -8 | 6  | 398.51 | 7.87 |
| -2 | -8 | 7  | 46.40  | 2.43 |
| -2 | -8 | 7  | 53.89  | 2.67 |
| -2 | -8 | 7  | 62.38  | 3.36 |
| -2 | -8 | 7  | 65.03  | 3.52 |
| -2 | -8 | 7  | 54.10  | 2.48 |
| -2 | -8 | 7  | 53.74  | 2.89 |
| -2 | -8 | 7  | 60.61  | 2.96 |
| -2 | -8 | 7  | 54.82  | 3.13 |
| -2 | -8 | 7  | 63.53  | 3.37 |
| -2 | -8 | 7  | 59.30  | 3.04 |
| -2 | -8 | 7  | 55.79  | 3.09 |
| -2 | -8 | 8  | 375.59 | 7.66 |
| -2 | -8 | 8  | 371.77 | 8.17 |
| -2 | -8 | 8  | 350.44 | 7.85 |
| -2 | -8 | 8  | 363.32 | 6.79 |
| -2 | -8 | 8  | 363.55 | 6.73 |
| -2 | -8 | 8  | 378.77 | 7.37 |
| -2 | -8 | 8  | 322.52 | 7.59 |
| -2 | -8 | 8  | 342.01 | 7.38 |
| -2 | -8 | 8  | 390.32 | 8.01 |
| -2 | -8 | 8  | 388.94 | 8.27 |
| -2 | -8 | 9  | 1.50   | 0.83 |
| -2 | -8 | 9  | 2.82   | 0.76 |
| -2 | -8 | 9  | 1.29   | 1.16 |
| -2 | -8 | 9  | 0.94   | 0.86 |
| -2 | -8 | 9  | 0.74   | 0.97 |
| -2 | -8 | 9  | 2.51   | 1.02 |
| -2 | -8 | 9  | 0.87   | 1.00 |
| -2 | -8 | 9  | 0.64   | 0.88 |
| -2 | -8 | 9  | 0.84   | 0.89 |
| -2 | -8 | 10 | 374.69 | 7.44 |
| -2 | -8 | 10 | 371.54 | 7.80 |
| -2 | -8 | 10 | 370.93 | 6.87 |
| -2 | -8 | 10 | 376.71 | 7.14 |

## CIF 31

|    |    |    |        |      |
|----|----|----|--------|------|
| -2 | -8 | 10 | 348.67 | 7.04 |
| -2 | -8 | 10 | 371.56 | 7.88 |
| -2 | -8 | 10 | 360.08 | 7.73 |
| -2 | -8 | 10 | 335.65 | 6.89 |
| -2 | -8 | 10 | 386.37 | 7.87 |
| -2 | -8 | 10 | 380.60 | 7.60 |
| -2 | -8 | 11 | 9.61   | 1.38 |
| -2 | -8 | 11 | 7.13   | 1.03 |
| -2 | -8 | 11 | 8.03   | 1.18 |
| -2 | -8 | 11 | 8.48   | 1.42 |
| -2 | -8 | 11 | 9.75   | 1.45 |
| -2 | -8 | 12 | 115.47 | 3.56 |
| -2 | -8 | 12 | 116.37 | 3.35 |
| -2 | -8 | 12 | 120.46 | 3.80 |
| -2 | -8 | 12 | 120.11 | 3.86 |
| -2 | -8 | 13 | 8.73   | 1.02 |
| -2 | -8 | 13 | 8.02   | 0.89 |
| -2 | -8 | 13 | 8.03   | 1.10 |
| -2 | -8 | 14 | 6.32   | 0.70 |
| -2 | -8 | 14 | 7.48   | 0.83 |
| -2 | -7 | -8 | 44.26  | 1.49 |
| -2 | -7 | -8 | 49.97  | 1.59 |
| -2 | -7 | -7 | 498.13 | 7.50 |
| -2 | -7 | -7 | 488.16 | 7.37 |
| -2 | -7 | -6 | 39.07  | 1.88 |
| -2 | -7 | -6 | 34.77  | 2.07 |
| -2 | -7 | -6 | 38.07  | 1.81 |
| -2 | -7 | -6 | 41.83  | 2.14 |
| -2 | -7 | -5 | 92.77  | 3.21 |
| -2 | -7 | -5 | 94.01  | 3.28 |
| -2 | -7 | -5 | 86.59  | 2.93 |
| -2 | -7 | -4 | 50.98  | 2.56 |
| -2 | -7 | -4 | 47.66  | 2.60 |
| -2 | -7 | -4 | 41.95  | 2.14 |
| -2 | -7 | -4 | 42.18  | 2.46 |
| -2 | -7 | -4 | 44.46  | 2.48 |
| -2 | -7 | -4 | 47.73  | 2.50 |
| -2 | -7 | -4 | 42.70  | 2.07 |
| -2 | -7 | -3 | 128.44 | 4.07 |
| -2 | -7 | -3 | 133.97 | 4.34 |
| -2 | -7 | -3 | 140.20 | 4.48 |

## CIF 31

|    |    |    |        |       |
|----|----|----|--------|-------|
| -2 | -7 | -3 | 116.68 | 3.55  |
| -2 | -7 | -3 | 123.44 | 4.30  |
| -2 | -7 | -3 | 120.32 | 3.72  |
| -2 | -7 | -2 | 329.05 | 7.01  |
| -2 | -7 | -2 | 274.09 | 6.53  |
| -2 | -7 | -2 | 282.55 | 5.66  |
| -2 | -7 | -2 | 311.47 | 6.43  |
| -2 | -7 | -2 | 315.37 | 5.84  |
| -2 | -7 | -2 | 297.32 | 6.95  |
| -2 | -7 | -1 | 356.88 | 7.85  |
| -2 | -7 | -1 | 373.27 | 8.89  |
| -2 | -7 | -1 | 380.31 | 6.84  |
| -2 | -7 | -1 | 376.33 | 6.95  |
| -2 | -7 | -1 | 372.64 | 7.80  |
| -2 | -7 | 0  | 749.48 | 12.03 |
| -2 | -7 | 0  | 746.93 | 10.34 |
| -2 | -7 | 0  | 777.84 | 13.35 |
| -2 | -7 | 0  | 766.68 | 10.88 |
| -2 | -7 | 0  | 760.52 | 11.06 |
| -2 | -7 | 0  | 752.42 | 12.40 |
| -2 | -7 | 1  | 220.79 | 6.57  |
| -2 | -7 | 1  | 220.89 | 6.52  |
| -2 | -7 | 1  | 198.47 | 6.17  |
| -2 | -7 | 1  | 226.49 | 5.35  |
| -2 | -7 | 1  | 219.52 | 5.28  |
| -2 | -7 | 1  | 215.83 | 5.95  |
| -2 | -7 | 1  | 226.75 | 5.94  |
| -2 | -7 | 1  | 219.35 | 5.74  |
| -2 | -7 | 1  | 223.13 | 5.74  |
| -2 | -7 | 2  | 3.34   | 1.01  |
| -2 | -7 | 2  | 3.58   | 0.94  |
| -2 | -7 | 2  | 3.07   | 1.30  |
| -2 | -7 | 2  | 2.17   | 1.22  |
| -2 | -7 | 2  | 2.92   | 1.22  |
| -2 | -7 | 2  | 3.33   | 0.93  |
| -2 | -7 | 2  | 2.68   | 1.07  |
| -2 | -7 | 2  | 3.99   | 1.02  |
| -2 | -7 | 2  | 3.91   | 1.11  |
| -2 | -7 | 3  | 51.75  | 2.56  |
| -2 | -7 | 3  | 54.45  | 3.21  |
| -2 | -7 | 3  | 54.32  | 3.20  |

## CIF 31

|    |    |   |        |      |
|----|----|---|--------|------|
| -2 | -7 | 3 | 48.90  | 2.49 |
| -2 | -7 | 3 | 49.81  | 2.73 |
| -2 | -7 | 3 | 47.17  | 2.55 |
| -2 | -7 | 3 | 50.77  | 2.87 |
| -2 | -7 | 3 | 51.15  | 2.38 |
| -2 | -7 | 3 | 50.69  | 2.84 |
| -2 | -7 | 4 | 531.57 | 8.81 |
| -2 | -7 | 4 | 494.71 | 9.75 |
| -2 | -7 | 4 | 484.98 | 9.84 |
| -2 | -7 | 4 | 505.16 | 8.38 |
| -2 | -7 | 4 | 496.67 | 9.25 |
| -2 | -7 | 4 | 464.36 | 8.36 |
| -2 | -7 | 4 | 478.91 | 9.13 |
| -2 | -7 | 4 | 499.79 | 9.37 |
| -2 | -7 | 4 | 506.13 | 8.49 |
| -2 | -7 | 4 | 522.18 | 9.53 |
| -2 | -7 | 5 | 121.24 | 3.84 |
| -2 | -7 | 5 | 107.38 | 4.21 |
| -2 | -7 | 5 | 115.21 | 4.47 |
| -2 | -7 | 5 | 114.09 | 4.25 |
| -2 | -7 | 5 | 117.10 | 3.82 |
| -2 | -7 | 5 | 118.89 | 3.97 |
| -2 | -7 | 5 | 127.54 | 4.47 |
| -2 | -7 | 5 | 127.73 | 3.93 |
| -2 | -7 | 5 | 119.75 | 4.33 |
| -2 | -7 | 5 | 124.02 | 4.09 |
| -2 | -7 | 5 | 118.35 | 4.35 |
| -2 | -7 | 6 | 185.51 | 5.55 |
| -2 | -7 | 6 | 177.11 | 5.20 |
| -2 | -7 | 6 | 183.01 | 5.64 |
| -2 | -7 | 6 | 167.96 | 4.40 |
| -2 | -7 | 6 | 199.40 | 5.67 |
| -2 | -7 | 6 | 181.48 | 4.72 |
| -2 | -7 | 6 | 178.47 | 5.01 |
| -2 | -7 | 6 | 172.38 | 5.28 |
| -2 | -7 | 6 | 181.39 | 5.40 |
| -2 | -7 | 6 | 180.62 | 4.83 |
| -2 | -7 | 6 | 159.28 | 5.00 |
| -2 | -7 | 6 | 190.04 | 5.29 |
| -2 | -7 | 6 | 164.36 | 5.24 |
| -2 | -7 | 7 | 290.27 | 7.03 |

## CIF 31

|    |    |    |        |      |
|----|----|----|--------|------|
| -2 | -7 | 7  | 281.74 | 5.82 |
| -2 | -7 | 7  | 251.71 | 6.72 |
| -2 | -7 | 7  | 257.95 | 6.04 |
| -2 | -7 | 7  | 292.45 | 5.99 |
| -2 | -7 | 7  | 268.36 | 6.75 |
| -2 | -7 | 7  | 273.24 | 6.87 |
| -2 | -7 | 7  | 273.37 | 6.74 |
| -2 | -7 | 7  | 239.39 | 6.23 |
| -2 | -7 | 7  | 291.38 | 6.83 |
| -2 | -7 | 7  | 261.35 | 6.76 |
| -2 | -7 | 8  | 2.23   | 0.95 |
| -2 | -7 | 8  | 3.21   | 0.82 |
| -2 | -7 | 8  | 2.28   | 0.89 |
| -2 | -7 | 8  | 1.44   | 0.87 |
| -2 | -7 | 8  | 2.07   | 1.10 |
| -2 | -7 | 8  | 1.92   | 1.26 |
| -2 | -7 | 8  | 1.83   | 1.04 |
| -2 | -7 | 8  | 1.77   | 1.14 |
| -2 | -7 | 8  | 1.58   | 1.03 |
| -2 | -7 | 8  | 2.53   | 0.91 |
| -2 | -7 | 8  | 1.71   | 1.07 |
| -2 | -7 | 9  | 235.15 | 5.56 |
| -2 | -7 | 9  | 228.06 | 6.12 |
| -2 | -7 | 9  | 221.01 | 6.23 |
| -2 | -7 | 9  | 233.25 | 5.73 |
| -2 | -7 | 9  | 216.12 | 4.64 |
| -2 | -7 | 9  | 206.47 | 6.16 |
| -2 | -7 | 9  | 220.40 | 6.19 |
| -2 | -7 | 9  | 228.94 | 6.26 |
| -2 | -7 | 9  | 203.13 | 5.72 |
| -2 | -7 | 9  | 206.95 | 5.64 |
| -2 | -7 | 9  | 224.00 | 6.13 |
| -2 | -7 | 9  | 206.86 | 5.83 |
| -2 | -7 | 10 | 44.74  | 2.88 |
| -2 | -7 | 10 | 46.26  | 2.87 |
| -2 | -7 | 10 | 45.54  | 2.68 |
| -2 | -7 | 10 | 46.94  | 2.70 |
| -2 | -7 | 10 | 39.60  | 2.42 |
| -2 | -7 | 10 | 45.66  | 2.92 |
| -2 | -7 | 10 | 45.68  | 2.86 |
| -2 | -7 | 10 | 39.62  | 2.45 |

## CIF 31

|    |    |    |        |       |
|----|----|----|--------|-------|
| -2 | -7 | 10 | 38.92  | 2.36  |
| -2 | -7 | 10 | 40.89  | 2.45  |
| -2 | -7 | 11 | 811.23 | 12.70 |
| -2 | -7 | 11 | 784.67 | 11.78 |
| -2 | -7 | 11 | 911.50 | 12.71 |
| -2 | -7 | 11 | 853.87 | 13.17 |
| -2 | -7 | 11 | 912.30 | 12.52 |
| -2 | -7 | 11 | 815.92 | 12.90 |
| -2 | -7 | 11 | 868.29 | 13.16 |
| -2 | -7 | 11 | 824.15 | 12.13 |
| -2 | -7 | 11 | 863.80 | 13.03 |
| -2 | -7 | 12 | 16.98  | 1.73  |
| -2 | -7 | 12 | 13.87  | 1.63  |
| -2 | -7 | 12 | 15.03  | 1.49  |
| -2 | -7 | 12 | 15.22  | 1.48  |
| -2 | -7 | 12 | 15.51  | 1.63  |
| -2 | -7 | 12 | 17.40  | 1.82  |
| -2 | -7 | 12 | 13.09  | 1.34  |
| -2 | -7 | 12 | 16.13  | 1.61  |
| -2 | -7 | 13 | 4.68   | 1.05  |
| -2 | -7 | 13 | 4.45   | 1.01  |
| -2 | -7 | 13 | 3.65   | 0.95  |
| -2 | -7 | 13 | 3.68   | 1.02  |
| -2 | -7 | 14 | 20.98  | 1.36  |
| -2 | -7 | 14 | 19.99  | 1.48  |
| -2 | -6 | -9 | 0.68   | 0.40  |
| -2 | -6 | -9 | 1.36   | 0.53  |
| -2 | -6 | -9 | 0.59   | 0.64  |
| -2 | -6 | -9 | 0.88   | 0.52  |
| -2 | -6 | -8 | 268.72 | 5.08  |
| -2 | -6 | -8 | 273.85 | 5.86  |
| -2 | -6 | -8 | 262.69 | 5.27  |
| -2 | -6 | -7 | 17.51  | 1.36  |
| -2 | -6 | -7 | 17.99  | 1.61  |
| -2 | -6 | -7 | 14.85  | 1.42  |
| -2 | -6 | -7 | 16.88  | 1.75  |
| -2 | -6 | -6 | 50.34  | 2.41  |
| -2 | -6 | -6 | 51.51  | 2.50  |
| -2 | -6 | -6 | 49.32  | 2.93  |
| -2 | -6 | -5 | 324.80 | 6.74  |
| -2 | -6 | -5 | 317.48 | 7.49  |



## CIF 31

|    |    |    |         |       |
|----|----|----|---------|-------|
| -2 | -6 | -5 | 302.58  | 6.40  |
| -2 | -6 | -5 | 329.50  | 6.86  |
| -2 | -6 | -5 | 311.55  | 6.70  |
| -2 | -6 | -5 | 305.99  | 5.73  |
| -2 | -6 | -4 | 32.54   | 2.22  |
| -2 | -6 | -4 | 29.02   | 2.14  |
| -2 | -6 | -4 | 28.95   | 1.97  |
| -2 | -6 | -4 | 29.87   | 2.21  |
| -2 | -6 | -4 | 33.93   | 2.50  |
| -2 | -6 | -4 | 32.42   | 2.22  |
| -2 | -6 | -4 | 28.84   | 1.86  |
| -2 | -6 | -3 | 30.09   | 2.13  |
| -2 | -6 | -3 | 23.67   | 1.77  |
| -2 | -6 | -3 | 27.13   | 2.17  |
| -2 | -6 | -3 | 27.10   | 2.05  |
| -2 | -6 | -3 | 29.52   | 2.07  |
| -2 | -6 | -3 | 26.85   | 2.04  |
| -2 | -6 | -3 | 29.49   | 1.93  |
| -2 | -6 | -2 | 1170.79 | 13.98 |
| -2 | -6 | -2 | 1201.84 | 14.95 |
| -2 | -6 | -2 | 1213.73 | 14.47 |
| -2 | -6 | -2 | 1255.83 | 15.94 |
| -2 | -6 | -2 | 1275.47 | 16.02 |
| -2 | -6 | -1 | 541.64  | 10.45 |
| -2 | -6 | -1 | 476.58  | 7.83  |
| -2 | -6 | -1 | 499.42  | 7.74  |
| -2 | -6 | -1 | 460.80  | 7.93  |
| -2 | -6 | -1 | 519.37  | 8.38  |
| -2 | -6 | -1 | 550.59  | 9.44  |
| -2 | -6 | -1 | 561.34  | 9.36  |
| -2 | -6 | 0  | 259.45  | 5.17  |
| -2 | -6 | 0  | 235.99  | 6.48  |
| -2 | -6 | 0  | 248.53  | 6.64  |
| -2 | -6 | 0  | 257.35  | 5.34  |
| -2 | -6 | 0  | 233.19  | 5.90  |
| -2 | -6 | 0  | 235.79  | 5.26  |
| -2 | -6 | 0  | 241.32  | 5.84  |
| -2 | -6 | 1  | 1.99    | 0.85  |
| -2 | -6 | 1  | 2.11    | 0.79  |
| -2 | -6 | 1  | 4.84    | 1.28  |
| -2 | -6 | 1  | 2.80    | 0.82  |

## CIF 31

|    |    |   |        |      |
|----|----|---|--------|------|
| -2 | -6 | 1 | 4.34   | 1.12 |
| -2 | -6 | 1 | 2.49   | 0.95 |
| -2 | -6 | 2 | 50.34  | 2.61 |
| -2 | -6 | 2 | 51.77  | 2.91 |
| -2 | -6 | 2 | 55.77  | 2.61 |
| -2 | -6 | 2 | 44.49  | 2.63 |
| -2 | -6 | 2 | 53.16  | 3.03 |
| -2 | -6 | 2 | 50.15  | 2.84 |
| -2 | -6 | 2 | 49.74  | 2.28 |
| -2 | -6 | 2 | 52.76  | 2.59 |
| -2 | -6 | 2 | 48.50  | 2.58 |
| -2 | -6 | 2 | 49.94  | 2.32 |
| -2 | -6 | 2 | 50.61  | 2.17 |
| -2 | -6 | 3 | 151.16 | 4.64 |
| -2 | -6 | 3 | 129.70 | 4.55 |
| -2 | -6 | 3 | 132.55 | 3.63 |
| -2 | -6 | 3 | 136.80 | 4.55 |
| -2 | -6 | 3 | 144.67 | 4.77 |
| -2 | -6 | 3 | 106.42 | 3.50 |
| -2 | -6 | 3 | 140.88 | 3.87 |
| -2 | -6 | 3 | 137.81 | 4.14 |
| -2 | -6 | 3 | 125.57 | 3.87 |
| -2 | -6 | 3 | 144.38 | 4.32 |
| -2 | -6 | 3 | 127.82 | 4.24 |
| -2 | -6 | 3 | 133.83 | 3.78 |
| -2 | -6 | 3 | 132.05 | 4.26 |
| -2 | -6 | 4 | 10.63  | 1.36 |
| -2 | -6 | 4 | 11.98  | 1.57 |
| -2 | -6 | 4 | 11.67  | 1.41 |
| -2 | -6 | 4 | 12.43  | 1.55 |
| -2 | -6 | 4 | 13.19  | 1.27 |
| -2 | -6 | 4 | 11.61  | 1.15 |
| -2 | -6 | 4 | 9.89   | 1.18 |
| -2 | -6 | 4 | 18.53  | 1.64 |
| -2 | -6 | 4 | 12.24  | 1.28 |
| -2 | -6 | 4 | 13.60  | 1.50 |
| -2 | -6 | 4 | 14.38  | 1.55 |
| -2 | -6 | 4 | 11.77  | 1.28 |
| -2 | -6 | 4 | 14.01  | 1.56 |
| -2 | -6 | 5 | 36.00  | 2.32 |
| -2 | -6 | 5 | 37.79  | 2.42 |

## CIF 31

|    |    |   |        |       |
|----|----|---|--------|-------|
| -2 | -6 | 5 | 41.84  | 1.91  |
| -2 | -6 | 5 | 38.22  | 2.47  |
| -2 | -6 | 5 | 35.71  | 1.98  |
| -2 | -6 | 5 | 39.82  | 2.09  |
| -2 | -6 | 5 | 45.29  | 2.47  |
| -2 | -6 | 5 | 43.49  | 2.15  |
| -2 | -6 | 5 | 40.03  | 2.35  |
| -2 | -6 | 5 | 40.60  | 2.44  |
| -2 | -6 | 5 | 36.60  | 2.31  |
| -2 | -6 | 5 | 41.59  | 2.28  |
| -2 | -6 | 6 | 323.19 | 6.96  |
| -2 | -6 | 6 | 308.20 | 6.87  |
| -2 | -6 | 6 | 328.39 | 6.19  |
| -2 | -6 | 6 | 283.44 | 6.71  |
| -2 | -6 | 6 | 292.38 | 6.67  |
| -2 | -6 | 6 | 283.06 | 5.79  |
| -2 | -6 | 6 | 320.49 | 6.90  |
| -2 | -6 | 6 | 339.93 | 7.34  |
| -2 | -6 | 6 | 282.57 | 6.58  |
| -2 | -6 | 6 | 337.35 | 6.96  |
| -2 | -6 | 6 | 326.90 | 7.05  |
| -2 | -6 | 6 | 307.02 | 5.84  |
| -2 | -6 | 7 | 761.12 | 10.94 |
| -2 | -6 | 7 | 736.53 | 11.86 |
| -2 | -6 | 7 | 822.03 | 11.38 |
| -2 | -6 | 7 | 688.76 | 11.64 |
| -2 | -6 | 7 | 762.21 | 11.90 |
| -2 | -6 | 7 | 774.70 | 10.53 |
| -2 | -6 | 7 | 750.91 | 11.87 |
| -2 | -6 | 7 | 742.02 | 11.61 |
| -2 | -6 | 7 | 757.97 | 11.84 |
| -2 | -6 | 7 | 763.39 | 11.78 |
| -2 | -6 | 7 | 798.64 | 12.08 |
| -2 | -6 | 7 | 792.84 | 12.08 |
| -2 | -6 | 8 | 300.74 | 7.21  |
| -2 | -6 | 8 | 298.25 | 6.95  |
| -2 | -6 | 8 | 294.49 | 6.70  |
| -2 | -6 | 8 | 332.48 | 7.41  |
| -2 | -6 | 8 | 291.39 | 6.61  |
| -2 | -6 | 8 | 261.53 | 5.38  |
| -2 | -6 | 8 | 320.16 | 7.26  |

## CIF 31

|    |    |    |        |       |
|----|----|----|--------|-------|
| -2 | -6 | 8  | 298.20 | 7.00  |
| -2 | -6 | 8  | 295.73 | 6.94  |
| -2 | -6 | 8  | 279.29 | 6.60  |
| -2 | -6 | 8  | 307.12 | 7.14  |
| -2 | -6 | 8  | 307.65 | 6.92  |
| -2 | -6 | 9  | 29.89  | 2.16  |
| -2 | -6 | 9  | 35.19  | 2.52  |
| -2 | -6 | 9  | 25.58  | 1.80  |
| -2 | -6 | 9  | 31.85  | 2.51  |
| -2 | -6 | 9  | 29.24  | 2.30  |
| -2 | -6 | 9  | 33.20  | 2.47  |
| -2 | -6 | 9  | 30.58  | 2.52  |
| -2 | -6 | 9  | 30.28  | 2.31  |
| -2 | -6 | 9  | 30.20  | 2.36  |
| -2 | -6 | 9  | 30.90  | 2.65  |
| -2 | -6 | 9  | 32.98  | 2.36  |
| -2 | -6 | 9  | 30.61  | 2.23  |
| -2 | -6 | 10 | 559.85 | 9.99  |
| -2 | -6 | 10 | 554.49 | 10.18 |
| -2 | -6 | 10 | 490.75 | 9.90  |
| -2 | -6 | 10 | 515.85 | 9.57  |
| -2 | -6 | 10 | 451.90 | 7.94  |
| -2 | -6 | 10 | 546.55 | 9.79  |
| -2 | -6 | 10 | 535.65 | 9.84  |
| -2 | -6 | 10 | 522.78 | 9.71  |
| -2 | -6 | 10 | 473.06 | 9.07  |
| -2 | -6 | 10 | 533.11 | 10.01 |
| -2 | -6 | 10 | 534.28 | 10.10 |
| -2 | -6 | 10 | 520.93 | 9.12  |
| -2 | -6 | 11 | 84.04  | 3.68  |
| -2 | -6 | 11 | 83.58  | 3.76  |
| -2 | -6 | 11 | 83.01  | 3.85  |
| -2 | -6 | 11 | 96.46  | 3.98  |
| -2 | -6 | 11 | 82.12  | 3.53  |
| -2 | -6 | 11 | 83.20  | 3.85  |
| -2 | -6 | 11 | 85.39  | 3.24  |
| -2 | -6 | 11 | 75.27  | 3.63  |
| -2 | -6 | 11 | 83.75  | 3.55  |
| -2 | -6 | 11 | 71.88  | 3.24  |
| -2 | -6 | 11 | 84.05  | 3.73  |
| -2 | -6 | 12 | 48.38  | 2.84  |

## CIF 31

|    |    |     |         |       |
|----|----|-----|---------|-------|
| -2 | -6 | 12  | 44.68   | 2.75  |
| -2 | -6 | 12  | 42.39   | 2.35  |
| -2 | -6 | 12  | 42.53   | 2.64  |
| -2 | -6 | 12  | 37.40   | 2.17  |
| -2 | -6 | 12  | 43.45   | 2.81  |
| -2 | -6 | 12  | 45.21   | 2.62  |
| -2 | -6 | 12  | 39.75   | 2.49  |
| -2 | -6 | 12  | 42.20   | 2.69  |
| -2 | -6 | 12  | 44.88   | 2.54  |
| -2 | -6 | 12  | 45.49   | 2.63  |
| -2 | -6 | 13  | 17.89   | 1.72  |
| -2 | -6 | 13  | 18.99   | 1.76  |
| -2 | -6 | 13  | 20.25   | 1.71  |
| -2 | -6 | 13  | 16.98   | 1.59  |
| -2 | -6 | 13  | 17.90   | 1.77  |
| -2 | -6 | 13  | 16.20   | 1.65  |
| -2 | -6 | 13  | 16.47   | 1.44  |
| -2 | -6 | 13  | 19.86   | 1.63  |
| -2 | -6 | 14  | 24.37   | 1.55  |
| -2 | -6 | 14  | 27.99   | 1.78  |
| -2 | -6 | 14  | 23.77   | 1.70  |
| -2 | -6 | 14  | 23.91   | 1.71  |
| -2 | -6 | 14  | 27.87   | 1.85  |
| -2 | -6 | 15  | 14.14   | 1.04  |
| -2 | -6 | 15  | 17.73   | 1.26  |
| -2 | -5 | -10 | 131.02  | 2.64  |
| -2 | -5 | -10 | 135.10  | 3.48  |
| -2 | -5 | -9  | 161.09  | 4.75  |
| -2 | -5 | -9  | 175.29  | 4.31  |
| -2 | -5 | -8  | 304.93  | 5.43  |
| -2 | -5 | -8  | 272.68  | 6.26  |
| -2 | -5 | -8  | 319.48  | 6.30  |
| -2 | -5 | -8  | 279.10  | 6.95  |
| -2 | -5 | -8  | 283.77  | 5.93  |
| -2 | -5 | -8  | 321.37  | 5.75  |
| -2 | -5 | -7  | 215.04  | 5.06  |
| -2 | -5 | -7  | 220.72  | 6.48  |
| -2 | -5 | -7  | 213.90  | 5.42  |
| -2 | -5 | -7  | 220.13  | 5.55  |
| -2 | -5 | -7  | 207.96  | 4.96  |
| -2 | -5 | -6  | 1042.91 | 15.71 |

## CIF 31

|    |    |    |         |       |
|----|----|----|---------|-------|
| -2 | -5 | -6 | 1014.43 | 13.59 |
| -2 | -5 | -6 | 1029.93 | 13.89 |
| -2 | -5 | -6 | 1042.56 | 14.21 |
| -2 | -5 | -5 | 4.31    | 1.08  |
| -2 | -5 | -5 | 8.45    | 1.40  |
| -2 | -5 | -5 | 2.16    | 0.83  |
| -2 | -5 | -5 | 6.26    | 1.55  |
| -2 | -5 | -5 | 1.86    | 0.94  |
| -2 | -5 | -5 | 3.03    | 0.94  |
| -2 | -5 | -5 | 2.42    | 0.85  |
| -2 | -5 | -4 | 1772.10 | 21.69 |
| -2 | -5 | -4 | 1845.69 | 20.30 |
| -2 | -5 | -4 | 1811.96 | 20.32 |
| -2 | -5 | -4 | 1721.08 | 19.82 |
| -2 | -5 | -4 | 1646.90 | 20.48 |
| -2 | -5 | -4 | 1750.22 | 20.26 |
| -2 | -5 | -4 | 1613.68 | 19.00 |
| -2 | -5 | -4 | 1836.17 | 19.37 |
| -2 | -5 | -3 | 0.45    | 0.89  |
| -2 | -5 | -3 | 0.37    | 0.82  |
| -2 | -5 | -3 | 1.61    | 0.85  |
| -2 | -5 | -3 | 0.29    | 0.93  |
| -2 | -5 | -3 | 1.79    | 0.94  |
| -2 | -5 | -3 | 1.14    | 0.68  |
| -2 | -5 | -3 | 1.13    | 0.83  |
| -2 | -5 | -2 | 29.14   | 1.82  |
| -2 | -5 | -2 | 27.69   | 1.74  |
| -2 | -5 | -2 | 29.76   | 1.62  |
| -2 | -5 | -2 | 26.35   | 1.59  |
| -2 | -5 | -2 | 28.42   | 1.92  |
| -2 | -5 | -2 | 26.09   | 1.92  |
| -2 | -5 | -1 | 1.01    | 0.58  |
| -2 | -5 | -1 | 0.88    | 0.59  |
| -2 | -5 | -1 | 0.16    | 0.63  |
| -2 | -5 | -1 | -0.14   | 0.72  |
| -2 | -5 | -1 | 0.92    | 0.58  |
| -2 | -5 | -1 | 0.37    | 0.79  |
| -2 | -5 | 0  | 366.10  | 6.77  |
| -2 | -5 | 0  | 376.87  | 7.67  |
| -2 | -5 | 0  | 395.09  | 6.43  |
| -2 | -5 | 0  | 381.05  | 6.15  |

## CIF 31

|    |    |   |        |      |
|----|----|---|--------|------|
| -2 | -5 | 0 | 384.40 | 6.88 |
| -2 | -5 | 0 | 374.55 | 6.29 |
| -2 | -5 | 0 | 363.65 | 6.95 |
| -2 | -5 | 0 | 378.50 | 5.61 |
| -2 | -5 | 0 | 398.35 | 6.88 |
| -2 | -5 | 1 | 209.68 | 5.41 |
| -2 | -5 | 1 | 211.19 | 5.57 |
| -2 | -5 | 1 | 198.94 | 5.24 |
| -2 | -5 | 1 | 180.85 | 4.16 |
| -2 | -5 | 1 | 186.27 | 4.10 |
| -2 | -5 | 1 | 193.60 | 4.58 |
| -2 | -5 | 1 | 186.00 | 4.61 |
| -2 | -5 | 1 | 187.80 | 3.89 |
| -2 | -5 | 1 | 194.27 | 4.63 |
| -2 | -5 | 2 | 152.18 | 4.47 |
| -2 | -5 | 2 | 146.47 | 4.50 |
| -2 | -5 | 2 | 146.32 | 4.35 |
| -2 | -5 | 2 | 144.68 | 3.47 |
| -2 | -5 | 2 | 134.10 | 3.50 |
| -2 | -5 | 2 | 156.70 | 3.68 |
| -2 | -5 | 2 | 143.89 | 3.87 |
| -2 | -5 | 2 | 144.56 | 3.87 |
| -2 | -5 | 2 | 154.88 | 4.09 |
| -2 | -5 | 2 | 147.63 | 4.22 |
| -2 | -5 | 2 | 149.95 | 3.56 |
| -2 | -5 | 2 | 151.24 | 4.10 |
| -2 | -5 | 3 | 12.86  | 1.14 |
| -2 | -5 | 3 | 12.05  | 1.40 |
| -2 | -5 | 3 | 14.08  | 1.51 |
| -2 | -5 | 3 | 12.16  | 1.41 |
| -2 | -5 | 3 | 10.91  | 1.04 |
| -2 | -5 | 3 | 12.22  | 1.26 |
| -2 | -5 | 3 | 10.47  | 1.18 |
| -2 | -5 | 3 | 12.96  | 1.31 |
| -2 | -5 | 3 | 10.33  | 1.29 |
| -2 | -5 | 3 | 11.86  | 1.37 |
| -2 | -5 | 3 | 12.25  | 1.21 |
| -2 | -5 | 3 | 15.42  | 1.46 |
| -2 | -5 | 4 | 185.21 | 4.18 |
| -2 | -5 | 4 | 173.95 | 4.18 |
| -2 | -5 | 4 | 186.99 | 4.75 |

## CIF 31

|    |    |   |        |      |
|----|----|---|--------|------|
| -2 | -5 | 4 | 202.94 | 5.05 |
| -2 | -5 | 4 | 193.91 | 3.87 |
| -2 | -5 | 4 | 190.86 | 4.95 |
| -2 | -5 | 4 | 197.61 | 3.72 |
| -2 | -5 | 4 | 203.11 | 4.93 |
| -2 | -5 | 4 | 191.87 | 4.58 |
| -2 | -5 | 4 | 204.65 | 4.82 |
| -2 | -5 | 4 | 210.86 | 4.97 |
| -2 | -5 | 4 | 193.19 | 4.79 |
| -2 | -5 | 4 | 205.18 | 4.67 |
| -2 | -5 | 5 | 45.33  | 2.31 |
| -2 | -5 | 5 | 50.78  | 2.13 |
| -2 | -5 | 5 | 58.86  | 2.69 |
| -2 | -5 | 5 | 55.62  | 2.68 |
| -2 | -5 | 5 | 45.25  | 2.03 |
| -2 | -5 | 5 | 44.43  | 2.36 |
| -2 | -5 | 5 | 46.18  | 2.04 |
| -2 | -5 | 5 | 54.71  | 2.27 |
| -2 | -5 | 5 | 51.10  | 2.49 |
| -2 | -5 | 5 | 53.44  | 2.51 |
| -2 | -5 | 5 | 54.28  | 2.52 |
| -2 | -5 | 5 | 48.01  | 2.40 |
| -2 | -5 | 5 | 45.30  | 2.18 |
| -2 | -5 | 5 | 51.03  | 2.47 |
| -2 | -5 | 5 | 49.46  | 2.43 |
| -2 | -5 | 5 | 58.70  | 2.62 |
| -2 | -5 | 5 | 55.00  | 2.61 |
| -2 | -5 | 6 | 160.44 | 4.46 |
| -2 | -5 | 6 | 155.61 | 4.48 |
| -2 | -5 | 6 | 149.56 | 4.32 |
| -2 | -5 | 6 | 163.93 | 4.43 |
| -2 | -5 | 6 | 159.80 | 4.59 |
| -2 | -5 | 6 | 145.39 | 4.23 |
| -2 | -5 | 6 | 141.31 | 3.62 |
| -2 | -5 | 6 | 138.83 | 4.15 |
| -2 | -5 | 6 | 152.10 | 4.19 |
| -2 | -5 | 6 | 161.32 | 4.47 |
| -2 | -5 | 6 | 144.54 | 4.23 |
| -2 | -5 | 6 | 136.61 | 3.82 |
| -2 | -5 | 6 | 153.24 | 4.39 |
| -2 | -5 | 6 | 148.29 | 4.33 |



## CIF 31

|    |    |    |         |       |
|----|----|----|---------|-------|
| -2 | -5 | 6  | 175.27  | 4.78  |
| -2 | -5 | 6  | 154.71  | 4.34  |
| -2 | -5 | 7  | 906.45  | 12.71 |
| -2 | -5 | 7  | 913.48  | 13.02 |
| -2 | -5 | 7  | 954.54  | 12.70 |
| -2 | -5 | 7  | 941.18  | 12.81 |
| -2 | -5 | 7  | 981.66  | 13.36 |
| -2 | -5 | 7  | 847.62  | 12.47 |
| -2 | -5 | 7  | 841.38  | 10.99 |
| -2 | -5 | 7  | 951.47  | 12.97 |
| -2 | -5 | 7  | 854.05  | 12.54 |
| -2 | -5 | 7  | 928.44  | 11.93 |
| -2 | -5 | 7  | 933.19  | 12.92 |
| -2 | -5 | 7  | 862.35  | 12.57 |
| -2 | -5 | 7  | 1015.62 | 13.69 |
| -2 | -5 | 7  | 977.22  | 12.95 |
| -2 | -5 | 8  | 147.61  | 4.61  |
| -2 | -5 | 8  | 145.95  | 4.64  |
| -2 | -5 | 8  | 152.73  | 5.10  |
| -2 | -5 | 8  | 171.66  | 5.04  |
| -2 | -5 | 8  | 133.09  | 4.38  |
| -2 | -5 | 8  | 164.99  | 4.94  |
| -2 | -5 | 8  | 137.31  | 4.82  |
| -2 | -5 | 8  | 144.28  | 3.92  |
| -2 | -5 | 8  | 155.66  | 4.70  |
| -2 | -5 | 8  | 154.82  | 4.70  |
| -2 | -5 | 8  | 142.50  | 4.32  |
| -2 | -5 | 9  | 71.20   | 3.26  |
| -2 | -5 | 9  | 78.10   | 3.59  |
| -2 | -5 | 9  | 71.57   | 3.40  |
| -2 | -5 | 9  | 76.55   | 3.48  |
| -2 | -5 | 9  | 77.24   | 4.02  |
| -2 | -5 | 9  | 67.07   | 3.32  |
| -2 | -5 | 9  | 80.93   | 4.14  |
| -2 | -5 | 9  | 77.58   | 3.02  |
| -2 | -5 | 9  | 66.09   | 3.33  |
| -2 | -5 | 9  | 72.24   | 3.35  |
| -2 | -5 | 9  | 70.83   | 3.29  |
| -2 | -5 | 9  | 83.71   | 3.63  |
| -2 | -5 | 9  | 84.77   | 3.31  |
| -2 | -5 | 10 | 66.11   | 2.97  |

## CIF 31

|    |    |    |        |       |
|----|----|----|--------|-------|
| -2 | -5 | 10 | 60.24  | 3.05  |
| -2 | -5 | 10 | 64.57  | 3.39  |
| -2 | -5 | 10 | 63.84  | 3.56  |
| -2 | -5 | 10 | 65.87  | 3.33  |
| -2 | -5 | 10 | 63.81  | 3.63  |
| -2 | -5 | 10 | 58.22  | 3.12  |
| -2 | -5 | 10 | 58.60  | 4.01  |
| -2 | -5 | 10 | 64.45  | 3.25  |
| -2 | -5 | 10 | 60.49  | 3.34  |
| -2 | -5 | 10 | 66.22  | 3.26  |
| -2 | -5 | 10 | 57.13  | 3.06  |
| -2 | -5 | 10 | 72.60  | 3.41  |
| -2 | -5 | 10 | 56.13  | 2.61  |
| -2 | -5 | 11 | 67.82  | 3.20  |
| -2 | -5 | 11 | 63.94  | 3.43  |
| -2 | -5 | 11 | 76.78  | 3.75  |
| -2 | -5 | 11 | 70.07  | 3.37  |
| -2 | -5 | 11 | 71.24  | 3.38  |
| -2 | -5 | 11 | 80.91  | 3.97  |
| -2 | -5 | 11 | 70.03  | 3.90  |
| -2 | -5 | 11 | 73.67  | 3.69  |
| -2 | -5 | 11 | 75.12  | 3.32  |
| -2 | -5 | 11 | 73.46  | 3.52  |
| -2 | -5 | 11 | 77.19  | 3.54  |
| -2 | -5 | 11 | 71.57  | 3.36  |
| -2 | -5 | 11 | 78.73  | 3.61  |
| -2 | -5 | 12 | 614.31 | 10.68 |
| -2 | -5 | 12 | 620.48 | 10.83 |
| -2 | -5 | 12 | 540.37 | 9.38  |
| -2 | -5 | 12 | 583.33 | 10.70 |
| -2 | -5 | 12 | 605.19 | 10.13 |
| -2 | -5 | 12 | 669.67 | 11.26 |
| -2 | -5 | 12 | 616.16 | 11.03 |
| -2 | -5 | 12 | 585.83 | 9.70  |
| -2 | -5 | 12 | 618.56 | 10.97 |
| -2 | -5 | 12 | 553.07 | 9.95  |
| -2 | -5 | 12 | 579.73 | 10.00 |
| -2 | -5 | 12 | 668.23 | 10.62 |
| -2 | -5 | 13 | 33.29  | 2.35  |
| -2 | -5 | 13 | 26.42  | 1.84  |
| -2 | -5 | 13 | 31.93  | 2.14  |

## CIF 31

|    |    |     |        |      |
|----|----|-----|--------|------|
| -2 | -5 | 13  | 35.89  | 2.36 |
| -2 | -5 | 13  | 31.10  | 2.21 |
| -2 | -5 | 13  | 29.94  | 2.27 |
| -2 | -5 | 13  | 34.47  | 2.41 |
| -2 | -5 | 13  | 33.20  | 2.15 |
| -2 | -5 | 13  | 33.65  | 2.03 |
| -2 | -5 | 14  | 31.66  | 2.08 |
| -2 | -5 | 14  | 31.76  | 2.02 |
| -2 | -5 | 14  | 32.94  | 2.09 |
| -2 | -5 | 14  | 34.69  | 2.02 |
| -2 | -5 | 14  | 30.79  | 1.95 |
| -2 | -5 | 14  | 26.88  | 1.68 |
| -2 | -5 | 15  | 0.80   | 0.67 |
| -2 | -5 | 15  | 0.78   | 0.58 |
| -2 | -5 | 15  | 0.61   | 0.58 |
| -2 | -5 | 15  | 0.51   | 0.67 |
| -2 | -4 | -11 | 2.50   | 0.83 |
| -2 | -4 | -11 | 1.51   | 0.54 |
| -2 | -4 | -11 | 2.22   | 0.53 |
| -2 | -4 | -10 | 141.98 | 3.59 |
| -2 | -4 | -10 | 151.42 | 3.46 |
| -2 | -4 | -10 | 135.42 | 3.33 |
| -2 | -4 | -10 | 144.56 | 3.87 |
| -2 | -4 | -10 | 142.54 | 4.43 |
| -2 | -4 | -9  | 4.95   | 1.09 |
| -2 | -4 | -9  | 0.78   | 0.80 |
| -2 | -4 | -9  | 3.79   | 1.44 |
| -2 | -4 | -9  | 1.53   | 0.77 |
| -2 | -4 | -9  | 0.57   | 0.96 |
| -2 | -4 | -8  | 250.89 | 5.42 |
| -2 | -4 | -8  | 263.80 | 6.01 |
| -2 | -4 | -8  | 249.84 | 5.89 |
| -2 | -4 | -8  | 249.18 | 7.11 |
| -2 | -4 | -7  | 177.23 | 4.72 |
| -2 | -4 | -7  | 179.74 | 5.06 |
| -2 | -4 | -7  | 164.60 | 7.89 |
| -2 | -4 | -7  | 170.52 | 5.87 |
| -2 | -4 | -7  | 190.18 | 4.91 |
| -2 | -4 | -6  | 5.43   | 1.15 |
| -2 | -4 | -6  | 4.65   | 5.81 |
| -2 | -4 | -6  | 4.87   | 1.25 |

## CIF 31

|    |    |    |         |       |
|----|----|----|---------|-------|
| -2 | -4 | -6 | 4.11    | 1.16  |
| -2 | -4 | -6 | 2.50    | 1.34  |
| -2 | -4 | -6 | 2.79    | 0.97  |
| -2 | -4 | -6 | 3.60    | 0.89  |
| -2 | -4 | -5 | 256.65  | 5.83  |
| -2 | -4 | -5 | 255.76  | 8.59  |
| -2 | -4 | -5 | 237.79  | 5.74  |
| -2 | -4 | -5 | 236.17  | 5.64  |
| -2 | -4 | -5 | 229.70  | 6.00  |
| -2 | -4 | -5 | 277.77  | 7.16  |
| -2 | -4 | -5 | 227.57  | 5.31  |
| -2 | -4 | -5 | 259.31  | 5.65  |
| -2 | -4 | -5 | 237.59  | 5.03  |
| -2 | -4 | -4 | 557.66  | 8.83  |
| -2 | -4 | -4 | 565.72  | 10.67 |
| -2 | -4 | -4 | 530.58  | 8.57  |
| -2 | -4 | -4 | 534.69  | 8.32  |
| -2 | -4 | -4 | 541.67  | 9.18  |
| -2 | -4 | -4 | 521.23  | 8.51  |
| -2 | -4 | -4 | 521.59  | 8.00  |
| -2 | -4 | -3 | 7.92    | 1.07  |
| -2 | -4 | -3 | 9.27    | 2.55  |
| -2 | -4 | -3 | 5.55    | 0.99  |
| -2 | -4 | -3 | 6.16    | 0.95  |
| -2 | -4 | -3 | 10.88   | 1.18  |
| -2 | -4 | -3 | 6.57    | 0.95  |
| -2 | -4 | -3 | 10.28   | 1.22  |
| -2 | -4 | -3 | 7.58    | 0.93  |
| -2 | -4 | -2 | 760.55  | 11.57 |
| -2 | -4 | -2 | 764.26  | 10.59 |
| -2 | -4 | -2 | 785.11  | 11.75 |
| -2 | -4 | -2 | 760.28  | 11.59 |
| -2 | -4 | -2 | 757.26  | 9.82  |
| -2 | -4 | -2 | 788.43  | 10.11 |
| -2 | -4 | -2 | 734.62  | 9.97  |
| -2 | -4 | -2 | 724.94  | 9.64  |
| -2 | -4 | -2 | 829.38  | 10.63 |
| -2 | -4 | -2 | 744.35  | 9.76  |
| -2 | -4 | -1 | 1289.92 | 16.00 |
| -2 | -4 | -1 | 1262.75 | 15.70 |
| -2 | -4 | -1 | 1282.29 | 14.64 |

## CIF 31

|    |    |    |         |       |
|----|----|----|---------|-------|
| -2 | -4 | -1 | 1295.45 | 14.64 |
| -2 | -4 | -1 | 1278.97 | 14.90 |
| -2 | -4 | 0  | 338.59  | 6.79  |
| -2 | -4 | 0  | 341.77  | 6.89  |
| -2 | -4 | 0  | 351.40  | 6.60  |
| -2 | -4 | 0  | 329.20  | 6.44  |
| -2 | -4 | 0  | 340.00  | 5.99  |
| -2 | -4 | 0  | 339.72  | 5.87  |
| -2 | -4 | 0  | 355.39  | 5.88  |
| -2 | -4 | 0  | 336.96  | 5.97  |
| -2 | -4 | 0  | 338.17  | 5.03  |
| -2 | -4 | 0  | 353.70  | 5.95  |
| -2 | -4 | 1  | 574.03  | 8.25  |
| -2 | -4 | 1  | 577.85  | 8.40  |
| -2 | -4 | 1  | 590.80  | 8.22  |
| -2 | -4 | 1  | 592.47  | 7.56  |
| -2 | -4 | 2  | 4.09    | 0.49  |
| -2 | -4 | 2  | 3.95    | 0.45  |
| -2 | -4 | 2  | 4.42    | 0.78  |
| -2 | -4 | 2  | 3.86    | 0.76  |
| -2 | -4 | 2  | 3.63    | 0.93  |
| -2 | -4 | 2  | 5.39    | 0.84  |
| -2 | -4 | 2  | 3.44    | 0.81  |
| -2 | -4 | 2  | 4.13    | 0.73  |
| -2 | -4 | 2  | 4.91    | 0.86  |
| -2 | -4 | 3  | 2.74    | 0.80  |
| -2 | -4 | 3  | 2.62    | 0.86  |
| -2 | -4 | 3  | 4.10    | 0.59  |
| -2 | -4 | 3  | 3.00    | 0.51  |
| -2 | -4 | 3  | 3.38    | 0.81  |
| -2 | -4 | 3  | 4.55    | 0.83  |
| -2 | -4 | 3  | 2.90    | 0.79  |
| -2 | -4 | 3  | 2.78    | 0.73  |
| -2 | -4 | 3  | 2.39    | 0.70  |
| -2 | -4 | 3  | 3.99    | 0.77  |
| -2 | -4 | 3  | 5.78    | 0.91  |
| -2 | -4 | 3  | 3.71    | 0.75  |
| -2 | -4 | 4  | 11.67   | 1.22  |
| -2 | -4 | 4  | 13.31   | 1.19  |
| -2 | -4 | 4  | 10.40   | 1.11  |
| -2 | -4 | 4  | 9.10    | 1.06  |

## CIF 31

|    |    |   |         |       |
|----|----|---|---------|-------|
| -2 | -4 | 4 | 15.45   | 1.26  |
| -2 | -4 | 4 | 15.04   | 1.36  |
| -2 | -4 | 4 | 9.32    | 1.09  |
| -2 | -4 | 4 | 13.46   | 1.27  |
| -2 | -4 | 4 | 11.13   | 1.05  |
| -2 | -4 | 4 | 12.34   | 1.22  |
| -2 | -4 | 4 | 9.81    | 0.68  |
| -2 | -4 | 4 | 12.23   | 1.14  |
| -2 | -4 | 4 | 14.10   | 1.27  |
| -2 | -4 | 4 | 14.49   | 1.28  |
| -2 | -4 | 4 | 10.73   | 1.09  |
| -2 | -4 | 4 | 11.02   | 1.16  |
| -2 | -4 | 4 | 12.90   | 1.19  |
| -2 | -4 | 4 | 8.98    | 1.16  |
| -2 | -4 | 5 | 1712.23 | 19.49 |
| -2 | -4 | 5 | 1852.93 | 19.64 |
| -2 | -4 | 5 | 1867.28 | 19.81 |
| -2 | -4 | 5 | 1935.82 | 20.05 |
| -2 | -4 | 5 | 1899.59 | 19.21 |
| -2 | -4 | 5 | 1876.31 | 20.01 |
| -2 | -4 | 5 | 1781.04 | 19.04 |
| -2 | -4 | 5 | 1953.24 | 19.63 |
| -2 | -4 | 5 | 1851.76 | 19.44 |
| -2 | -4 | 5 | 2011.54 | 19.70 |
| -2 | -4 | 5 | 1908.08 | 19.33 |
| -2 | -4 | 5 | 1890.52 | 19.79 |
| -2 | -4 | 5 | 1621.54 | 16.90 |
| -2 | -4 | 5 | 1784.87 | 19.50 |
| -2 | -4 | 5 | 2076.16 | 20.20 |
| -2 | -4 | 5 | 2029.82 | 19.98 |
| -2 | -4 | 6 | 9.92    | 1.17  |
| -2 | -4 | 6 | 9.70    | 1.19  |
| -2 | -4 | 6 | 8.62    | 1.18  |
| -2 | -4 | 6 | 11.07   | 1.23  |
| -2 | -4 | 6 | 13.39   | 1.45  |
| -2 | -4 | 6 | 12.02   | 1.30  |
| -2 | -4 | 6 | 9.84    | 1.44  |
| -2 | -4 | 6 | 8.38    | 0.94  |
| -2 | -4 | 6 | 8.01    | 0.93  |
| -2 | -4 | 6 | 10.75   | 1.22  |
| -2 | -4 | 6 | 8.72    | 1.01  |

## CIF 31

|    |    |    |         |       |
|----|----|----|---------|-------|
| -2 | -4 | 6  | 10.06   | 1.18  |
| -2 | -4 | 6  | 11.91   | 0.93  |
| -2 | -4 | 6  | 8.78    | 1.08  |
| -2 | -4 | 7  | 122.89  | 3.84  |
| -2 | -4 | 7  | 126.39  | 3.97  |
| -2 | -4 | 7  | 115.88  | 3.86  |
| -2 | -4 | 7  | 133.44  | 4.06  |
| -2 | -4 | 7  | 122.68  | 4.19  |
| -2 | -4 | 7  | 108.54  | 3.26  |
| -2 | -4 | 7  | 138.11  | 4.06  |
| -2 | -4 | 7  | 126.83  | 3.54  |
| -2 | -4 | 7  | 124.36  | 3.85  |
| -2 | -4 | 7  | 123.84  | 3.15  |
| -2 | -4 | 7  | 133.93  | 3.99  |
| -2 | -4 | 7  | 122.09  | 4.00  |
| -2 | -4 | 7  | 123.67  | 3.62  |
| -2 | -4 | 7  | 135.57  | 3.99  |
| -2 | -4 | 8  | 1241.30 | 15.86 |
| -2 | -4 | 8  | 1267.67 | 16.25 |
| -2 | -4 | 8  | 1172.76 | 15.80 |
| -2 | -4 | 8  | 1293.50 | 16.13 |
| -2 | -4 | 8  | 1199.89 | 16.21 |
| -2 | -4 | 8  | 1255.72 | 15.94 |
| -2 | -4 | 8  | 1309.95 | 15.20 |
| -2 | -4 | 8  | 1179.35 | 14.61 |
| -2 | -4 | 8  | 1239.64 | 15.76 |
| -2 | -4 | 8  | 1273.48 | 14.47 |
| -2 | -4 | 8  | 1293.53 | 16.04 |
| -2 | -4 | 8  | 1394.14 | 16.74 |
| -2 | -4 | 9  | 4207.19 | 40.88 |
| -2 | -4 | 9  | 4151.81 | 41.09 |
| -2 | -4 | 9  | 4209.77 | 41.70 |
| -2 | -4 | 9  | 4387.33 | 41.47 |
| -2 | -4 | 9  | 4012.69 | 41.42 |
| -2 | -4 | 9  | 4344.91 | 41.26 |
| -2 | -4 | 9  | 3919.94 | 39.02 |
| -2 | -4 | 9  | 3671.09 | 38.74 |
| -2 | -4 | 9  | 4398.09 | 41.31 |
| -2 | -4 | 9  | 4997.48 | 42.43 |
| -2 | -4 | 9  | 4244.83 | 39.30 |
| -2 | -4 | 10 | 186.08  | 5.40  |

## CIF 31

|    |    |    |        |      |
|----|----|----|--------|------|
| -2 | -4 | 10 | 181.06 | 5.54 |
| -2 | -4 | 10 | 184.88 | 6.07 |
| -2 | -4 | 10 | 207.73 | 5.21 |
| -2 | -4 | 10 | 179.38 | 5.38 |
| -2 | -4 | 10 | 189.56 | 6.19 |
| -2 | -4 | 10 | 168.41 | 5.17 |
| -2 | -4 | 10 | 161.79 | 4.95 |
| -2 | -4 | 10 | 172.30 | 5.25 |
| -2 | -4 | 10 | 223.02 | 5.73 |
| -2 | -4 | 11 | 4.39   | 1.12 |
| -2 | -4 | 11 | 2.91   | 1.13 |
| -2 | -4 | 11 | 3.62   | 1.17 |
| -2 | -4 | 11 | 3.47   | 1.40 |
| -2 | -4 | 11 | 4.37   | 2.49 |
| -2 | -4 | 11 | 2.85   | 1.38 |
| -2 | -4 | 11 | 3.31   | 1.20 |
| -2 | -4 | 11 | 2.97   | 1.11 |
| -2 | -4 | 11 | 3.99   | 1.12 |
| -2 | -4 | 12 | 5.36   | 1.19 |
| -2 | -4 | 12 | 6.08   | 1.66 |
| -2 | -4 | 12 | 5.17   | 1.23 |
| -2 | -4 | 12 | 8.61   | 1.72 |
| -2 | -4 | 12 | 4.48   | 1.31 |
| -2 | -4 | 12 | 5.39   | 1.28 |
| -2 | -4 | 12 | 3.96   | 1.43 |
| -2 | -4 | 12 | 4.32   | 1.34 |
| -2 | -4 | 12 | 3.69   | 1.12 |
| -2 | -4 | 12 | 6.12   | 1.15 |
| -2 | -4 | 13 | 324.40 | 6.65 |
| -2 | -4 | 13 | 332.62 | 7.33 |
| -2 | -4 | 13 | 335.46 | 7.64 |
| -2 | -4 | 13 | 314.98 | 7.10 |
| -2 | -4 | 13 | 373.74 | 7.66 |
| -2 | -4 | 13 | 315.29 | 6.74 |
| -2 | -4 | 13 | 362.88 | 7.62 |
| -2 | -4 | 13 | 316.08 | 6.90 |
| -2 | -4 | 13 | 299.68 | 7.29 |
| -2 | -4 | 13 | 328.59 | 7.14 |
| -2 | -4 | 13 | 320.06 | 6.93 |
| -2 | -4 | 14 | 114.15 | 3.93 |
| -2 | -4 | 14 | 109.40 | 3.77 |



## CIF 31

|    |    |     |        |      |
|----|----|-----|--------|------|
| -2 | -4 | 14  | 114.89 | 3.92 |
| -2 | -4 | 14  | 110.36 | 3.59 |
| -2 | -4 | 14  | 128.38 | 3.91 |
| -2 | -4 | 14  | 116.46 | 3.68 |
| -2 | -4 | 14  | 97.49  | 3.73 |
| -2 | -4 | 14  | 101.26 | 3.42 |
| -2 | -4 | 15  | 114.57 | 3.20 |
| -2 | -4 | 15  | 120.77 | 3.43 |
| -2 | -4 | 15  | 116.78 | 3.39 |
| -2 | -4 | 16  | 0.34   | 0.44 |
| -2 | -4 | 16  | 0.73   | 0.40 |
| -2 | -3 | -12 | 27.96  | 1.06 |
| -2 | -3 | -12 | 29.59  | 1.56 |
| -2 | -3 | -11 | 219.73 | 4.32 |
| -2 | -3 | -11 | 210.96 | 4.21 |
| -2 | -3 | -10 | 21.98  | 5.47 |
| -2 | -3 | -10 | 22.87  | 1.72 |
| -2 | -3 | -10 | 24.46  | 1.62 |
| -2 | -3 | -10 | 23.11  | 1.68 |
| -2 | -3 | -10 | 23.20  | 1.85 |
| -2 | -3 | -9  | 222.54 | 4.89 |
| -2 | -3 | -9  | 227.24 | 6.07 |
| -2 | -3 | -9  | 237.28 | 5.50 |
| -2 | -3 | -9  | 247.75 | 9.08 |
| -2 | -3 | -9  | 240.90 | 5.84 |
| -2 | -3 | -9  | 238.84 | 7.02 |
| -2 | -3 | -9  | 235.40 | 5.57 |
| -2 | -3 | -8  | 148.64 | 4.23 |
| -2 | -3 | -8  | 149.36 | 4.47 |
| -2 | -3 | -8  | 179.78 | 8.69 |
| -2 | -3 | -8  | 166.14 | 5.89 |
| -2 | -3 | -8  | 145.83 | 4.56 |
| -2 | -3 | -8  | 135.54 | 4.31 |
| -2 | -3 | -8  | 162.02 | 4.32 |
| -2 | -3 | -7  | 214.31 | 5.22 |
| -2 | -3 | -7  | 225.10 | 8.08 |
| -2 | -3 | -7  | 209.44 | 6.57 |
| -2 | -3 | -7  | 202.40 | 5.36 |
| -2 | -3 | -7  | 203.58 | 8.11 |
| -2 | -3 | -7  | 215.78 | 5.49 |
| -2 | -3 | -7  | 214.39 | 5.33 |

## CIF 31

|    |    |    |         |       |
|----|----|----|---------|-------|
| -2 | -3 | -7 | 217.78  | 5.06  |
| -2 | -3 | -6 | 678.85  | 10.06 |
| -2 | -3 | -6 | 644.61  | 9.93  |
| -2 | -3 | -6 | 733.91  | 12.71 |
| -2 | -3 | -6 | 657.16  | 9.55  |
| -2 | -3 | -6 | 630.89  | 10.03 |
| -2 | -3 | -6 | 658.76  | 10.28 |
| -2 | -3 | -6 | 682.57  | 11.72 |
| -2 | -3 | -6 | 687.78  | 10.85 |
| -2 | -3 | -6 | 623.19  | 9.17  |
| -2 | -3 | -6 | 692.22  | 12.05 |
| -2 | -3 | -5 | 257.99  | 5.51  |
| -2 | -3 | -5 | 286.71  | 7.42  |
| -2 | -3 | -5 | 268.21  | 5.76  |
| -2 | -3 | -5 | 252.95  | 5.42  |
| -2 | -3 | -5 | 263.63  | 6.16  |
| -2 | -3 | -5 | 247.86  | 6.85  |
| -2 | -3 | -5 | 276.84  | 6.07  |
| -2 | -3 | -5 | 265.75  | 5.35  |
| -2 | -3 | -5 | 252.02  | 5.04  |
| -2 | -3 | -4 | 194.47  | 4.52  |
| -2 | -3 | -4 | 198.33  | 4.60  |
| -2 | -3 | -4 | 202.43  | 4.58  |
| -2 | -3 | -4 | 206.26  | 4.93  |
| -2 | -3 | -4 | 183.85  | 5.25  |
| -2 | -3 | -4 | 197.12  | 4.74  |
| -2 | -3 | -4 | 200.02  | 4.47  |
| -2 | -3 | -4 | 206.84  | 4.48  |
| -2 | -3 | -4 | 200.88  | 4.24  |
| -2 | -3 | -3 | 1062.19 | 12.69 |
| -2 | -3 | -3 | 1235.47 | 15.04 |
| -2 | -3 | -3 | 1185.99 | 14.74 |
| -2 | -3 | -3 | 1012.78 | 12.40 |
| -2 | -3 | -3 | 1079.25 | 12.95 |
| -2 | -3 | -3 | 1040.16 | 12.78 |
| -2 | -3 | -3 | 1050.55 | 12.37 |
| -2 | -3 | -3 | 1139.21 | 12.79 |
| -2 | -3 | -2 | 180.64  | 4.60  |
| -2 | -3 | -2 | 183.72  | 4.65  |
| -2 | -3 | -2 | 181.79  | 4.48  |
| -2 | -3 | -2 | 159.02  | 3.55  |

## CIF 31

|    |    |    |         |       |
|----|----|----|---------|-------|
| -2 | -3 | -2 | 170.05  | 3.87  |
| -2 | -3 | -2 | 170.02  | 3.79  |
| -2 | -3 | -1 | 15.84   | 1.12  |
| -2 | -3 | -1 | 17.53   | 1.18  |
| -2 | -3 | -1 | 16.00   | 0.91  |
| -2 | -3 | 0  | 70.18   | 2.23  |
| -2 | -3 | 0  | 69.94   | 2.11  |
| -2 | -3 | 0  | 67.93   | 2.19  |
| -2 | -3 | 0  | 69.60   | 1.89  |
| -2 | -3 | 0  | 63.37   | 2.29  |
| -2 | -3 | 0  | 71.22   | 2.22  |
| -2 | -3 | 1  | 416.72  | 4.83  |
| -2 | -3 | 1  | 433.61  | 5.91  |
| -2 | -3 | 1  | 460.13  | 6.42  |
| -2 | -3 | 1  | 420.29  | 4.61  |
| -2 | -3 | 1  | 405.09  | 4.69  |
| -2 | -3 | 1  | 438.63  | 5.75  |
| -2 | -3 | 1  | 452.24  | 6.31  |
| -2 | -3 | 2  | 1005.04 | 10.32 |
| -2 | -3 | 2  | 846.52  | 10.28 |
| -2 | -3 | 2  | 955.00  | 9.41  |
| -2 | -3 | 2  | 951.29  | 9.14  |
| -2 | -3 | 2  | 847.99  | 8.53  |
| -2 | -3 | 2  | 1003.25 | 10.57 |
| -2 | -3 | 2  | 840.59  | 10.42 |
| -2 | -3 | 2  | 902.27  | 10.04 |
| -2 | -3 | 2  | 903.03  | 10.65 |
| -2 | -3 | 2  | 916.72  | 10.57 |
| -2 | -3 | 3  | 460.57  | 5.72  |
| -2 | -3 | 3  | 458.23  | 6.63  |
| -2 | -3 | 3  | 443.86  | 6.40  |
| -2 | -3 | 3  | 455.60  | 5.86  |
| -2 | -3 | 3  | 415.82  | 4.75  |
| -2 | -3 | 3  | 437.40  | 6.38  |
| -2 | -3 | 3  | 456.84  | 6.53  |
| -2 | -3 | 3  | 414.80  | 5.94  |
| -2 | -3 | 3  | 443.60  | 6.41  |
| -2 | -3 | 3  | 424.73  | 6.04  |
| -2 | -3 | 3  | 436.51  | 6.46  |
| -2 | -3 | 3  | 485.94  | 6.48  |
| -2 | -3 | 4  | 1135.38 | 12.25 |

## CIF 31

|    |    |   |         |       |
|----|----|---|---------|-------|
| -2 | -3 | 4 | 1020.79 | 12.09 |
| -2 | -3 | 4 | 1049.33 | 11.68 |
| -2 | -3 | 4 | 976.90  | 11.45 |
| -2 | -3 | 4 | 1063.65 | 12.30 |
| -2 | -3 | 4 | 1064.15 | 11.84 |
| -2 | -3 | 4 | 1071.02 | 11.92 |
| -2 | -3 | 4 | 1076.66 | 11.91 |
| -2 | -3 | 4 | 1207.30 | 11.69 |
| -2 | -3 | 4 | 1064.65 | 11.94 |
| -2 | -3 | 4 | 1010.01 | 10.20 |
| -2 | -3 | 4 | 1017.42 | 12.01 |
| -2 | -3 | 4 | 1181.91 | 12.44 |
| -2 | -3 | 4 | 1022.79 | 11.84 |
| -2 | -3 | 5 | 1897.52 | 19.81 |
| -2 | -3 | 5 | 1944.89 | 19.77 |
| -2 | -3 | 5 | 2001.06 | 19.99 |
| -2 | -3 | 5 | 1797.13 | 19.34 |
| -2 | -3 | 5 | 1773.20 | 19.46 |
| -2 | -3 | 5 | 1908.19 | 19.25 |
| -2 | -3 | 5 | 1998.09 | 19.23 |
| -2 | -3 | 5 | 1994.12 | 19.66 |
| -2 | -3 | 5 | 1841.06 | 19.25 |
| -2 | -3 | 5 | 2127.05 | 18.36 |
| -2 | -3 | 5 | 1924.99 | 19.79 |
| -2 | -3 | 5 | 2060.56 | 19.77 |
| -2 | -3 | 6 | 246.81  | 4.87  |
| -2 | -3 | 6 | 236.16  | 5.07  |
| -2 | -3 | 6 | 222.80  | 4.92  |
| -2 | -3 | 6 | 225.38  | 4.95  |
| -2 | -3 | 6 | 265.21  | 5.27  |
| -2 | -3 | 6 | 228.91  | 5.06  |
| -2 | -3 | 6 | 221.57  | 4.40  |
| -2 | -3 | 6 | 241.19  | 4.72  |
| -2 | -3 | 6 | 275.55  | 4.37  |
| -2 | -3 | 6 | 246.46  | 5.12  |
| -2 | -3 | 6 | 253.39  | 5.11  |
| -2 | -3 | 6 | 274.30  | 4.89  |
| -2 | -3 | 7 | 185.33  | 4.62  |
| -2 | -3 | 7 | 166.53  | 4.39  |
| -2 | -3 | 7 | 145.06  | 4.22  |
| -2 | -3 | 7 | 137.48  | 4.13  |

## CIF 31

|    |    |    |        |      |
|----|----|----|--------|------|
| -2 | -3 | 7  | 152.91 | 3.52 |
| -2 | -3 | 7  | 179.44 | 4.18 |
| -2 | -3 | 7  | 171.64 | 3.81 |
| -2 | -3 | 7  | 172.64 | 4.47 |
| -2 | -3 | 7  | 161.39 | 4.27 |
| -2 | -3 | 7  | 146.31 | 3.62 |
| -2 | -3 | 8  | 138.02 | 3.91 |
| -2 | -3 | 8  | 156.81 | 4.54 |
| -2 | -3 | 8  | 132.00 | 4.28 |
| -2 | -3 | 8  | 128.91 | 4.50 |
| -2 | -3 | 8  | 152.03 | 4.37 |
| -2 | -3 | 8  | 150.57 | 3.98 |
| -2 | -3 | 8  | 155.02 | 4.09 |
| -2 | -3 | 8  | 157.52 | 3.96 |
| -2 | -3 | 8  | 161.38 | 4.60 |
| -2 | -3 | 8  | 171.06 | 4.57 |
| -2 | -3 | 8  | 150.76 | 3.65 |
| -2 | -3 | 9  | 367.78 | 7.49 |
| -2 | -3 | 9  | 332.60 | 6.44 |
| -2 | -3 | 9  | 348.57 | 7.19 |
| -2 | -3 | 9  | 290.08 | 7.17 |
| -2 | -3 | 9  | 329.53 | 6.44 |
| -2 | -3 | 9  | 348.80 | 6.66 |
| -2 | -3 | 9  | 289.23 | 6.19 |
| -2 | -3 | 9  | 331.39 | 7.17 |
| -2 | -3 | 9  | 314.28 | 6.77 |
| -2 | -3 | 10 | 133.82 | 4.23 |
| -2 | -3 | 10 | 128.43 | 4.61 |
| -2 | -3 | 10 | 143.70 | 5.02 |
| -2 | -3 | 10 | 134.59 | 4.54 |
| -2 | -3 | 10 | 109.54 | 3.73 |
| -2 | -3 | 10 | 109.85 | 4.06 |
| -2 | -3 | 10 | 124.37 | 4.50 |
| -2 | -3 | 10 | 140.43 | 4.28 |
| -2 | -3 | 10 | 119.30 | 3.86 |
| -2 | -3 | 11 | 55.06  | 3.19 |
| -2 | -3 | 11 | 57.10  | 3.36 |
| -2 | -3 | 11 | 55.79  | 2.99 |
| -2 | -3 | 11 | 59.45  | 3.92 |
| -2 | -3 | 11 | 58.34  | 3.19 |
| -2 | -3 | 11 | 60.17  | 3.27 |

## CIF 31

|    |    |     |        |       |
|----|----|-----|--------|-------|
| -2 | -3 | 11  | 52.04  | 2.69  |
| -2 | -3 | 12  | 574.53 | 10.53 |
| -2 | -3 | 12  | 525.12 | 9.81  |
| -2 | -3 | 12  | 540.12 | 10.20 |
| -2 | -3 | 12  | 575.17 | 10.26 |
| -2 | -3 | 12  | 487.44 | 9.52  |
| -2 | -3 | 12  | 547.65 | 9.71  |
| -2 | -3 | 12  | 504.88 | 9.95  |
| -2 | -3 | 13  | 14.21  | 1.72  |
| -2 | -3 | 13  | 14.60  | 1.63  |
| -2 | -3 | 13  | 14.62  | 1.60  |
| -2 | -3 | 13  | 14.08  | 1.73  |
| -2 | -3 | 13  | 14.34  | 1.79  |
| -2 | -3 | 13  | 17.27  | 1.76  |
| -2 | -3 | 13  | 13.94  | 1.70  |
| -2 | -3 | 13  | 16.09  | 1.79  |
| -2 | -3 | 14  | 14.78  | 1.61  |
| -2 | -3 | 14  | 12.22  | 1.48  |
| -2 | -3 | 14  | 15.79  | 1.44  |
| -2 | -3 | 14  | 13.26  | 1.35  |
| -2 | -3 | 14  | 13.70  | 1.43  |
| -2 | -3 | 14  | 14.23  | 1.61  |
| -2 | -3 | 14  | 12.15  | 1.45  |
| -2 | -3 | 14  | 11.77  | 1.30  |
| -2 | -3 | 15  | 330.94 | 5.63  |
| -2 | -3 | 15  | 350.68 | 6.44  |
| -2 | -3 | 15  | 328.84 | 5.69  |
| -2 | -3 | 15  | 349.53 | 6.24  |
| -2 | -3 | 15  | 331.93 | 6.35  |
| -2 | -3 | 16  | 219.74 | 3.81  |
| -2 | -2 | -12 | 19.96  | 1.15  |
| -2 | -2 | -12 | 13.04  | 1.16  |
| -2 | -2 | -12 | 13.86  | 1.47  |
| -2 | -2 | -12 | 22.07  | 1.32  |
| -2 | -2 | -11 | 20.43  | 5.70  |
| -2 | -2 | -11 | 15.72  | 1.52  |
| -2 | -2 | -11 | 15.71  | 1.38  |
| -2 | -2 | -11 | 17.70  | 1.97  |
| -2 | -2 | -11 | 14.27  | 1.39  |
| -2 | -2 | -10 | 662.41 | 9.50  |
| -2 | -2 | -10 | 662.30 | 11.03 |

## CIF 31

|    |    |     |         |       |
|----|----|-----|---------|-------|
| -2 | -2 | -10 | 638.38  | 12.42 |
| -2 | -2 | -10 | 661.11  | 12.09 |
| -2 | -2 | -10 | 635.18  | 10.85 |
| -2 | -2 | -10 | 687.86  | 10.14 |
| -2 | -2 | -10 | 673.84  | 10.24 |
| -2 | -2 | -10 | 670.62  | 9.32  |
| -2 | -2 | -9  | 551.03  | 8.60  |
| -2 | -2 | -9  | 561.44  | 9.07  |
| -2 | -2 | -9  | 548.61  | 11.35 |
| -2 | -2 | -9  | 530.17  | 10.02 |
| -2 | -2 | -9  | 536.33  | 9.39  |
| -2 | -2 | -9  | 553.80  | 12.08 |
| -2 | -2 | -9  | 524.17  | 9.75  |
| -2 | -2 | -9  | 574.84  | 9.44  |
| -2 | -2 | -9  | 524.71  | 8.59  |
| -2 | -2 | -8  | 178.39  | 4.69  |
| -2 | -2 | -8  | 189.20  | 5.01  |
| -2 | -2 | -8  | 195.02  | 5.15  |
| -2 | -2 | -8  | 181.68  | 7.63  |
| -2 | -2 | -8  | 198.66  | 6.31  |
| -2 | -2 | -8  | 190.03  | 5.61  |
| -2 | -2 | -8  | 188.20  | 4.77  |
| -2 | -2 | -8  | 195.26  | 6.77  |
| -2 | -2 | -8  | 192.31  | 5.14  |
| -2 | -2 | -7  | 1081.12 | 13.87 |
| -2 | -2 | -7  | 1114.88 | 16.44 |
| -2 | -2 | -7  | 1139.99 | 14.45 |
| -2 | -2 | -7  | 1118.85 | 15.44 |
| -2 | -2 | -7  | 1101.34 | 14.24 |
| -2 | -2 | -7  | 1128.60 | 14.27 |
| -2 | -2 | -7  | 1091.55 | 13.67 |
| -2 | -2 | -7  | 1105.66 | 16.52 |
| -2 | -2 | -7  | 1081.21 | 14.39 |
| -2 | -2 | -6  | 210.62  | 4.98  |
| -2 | -2 | -6  | 219.96  | 4.96  |
| -2 | -2 | -6  | 223.24  | 5.78  |
| -2 | -2 | -6  | 227.11  | 5.11  |
| -2 | -2 | -6  | 239.22  | 6.27  |
| -2 | -2 | -6  | 235.05  | 6.32  |
| -2 | -2 | -6  | 200.83  | 5.15  |
| -2 | -2 | -6  | 207.38  | 4.96  |

## CIF 31

|    |    |    |         |       |
|----|----|----|---------|-------|
| -2 | -2 | -6 | 224.27  | 5.10  |
| -2 | -2 | -5 | 1014.95 | 12.49 |
| -2 | -2 | -5 | 1031.34 | 12.64 |
| -2 | -2 | -5 | 1131.40 | 14.76 |
| -2 | -2 | -5 | 1034.67 | 12.79 |
| -2 | -2 | -5 | 1062.53 | 12.77 |
| -2 | -2 | -5 | 977.28  | 13.09 |
| -2 | -2 | -5 | 1094.49 | 13.33 |
| -2 | -2 | -5 | 1058.17 | 12.74 |
| -2 | -2 | -5 | 1085.93 | 12.07 |
| -2 | -2 | -5 | 1007.53 | 11.95 |
| -2 | -2 | -4 | 8.25    | 1.21  |
| -2 | -2 | -4 | 6.99    | 0.93  |
| -2 | -2 | -4 | 5.36    | 0.87  |
| -2 | -2 | -4 | 5.62    | 0.88  |
| -2 | -2 | -4 | 8.12    | 0.88  |
| -2 | -2 | -4 | 6.29    | 0.89  |
| -2 | -2 | -3 | 3313.71 | 30.11 |
| -2 | -2 | -2 | 2984.19 | 26.38 |
| -2 | -2 | -2 | 3008.96 | 26.63 |
| -2 | -2 | -1 | 818.28  | 9.14  |
| -2 | -2 | -1 | 835.84  | 9.20  |
| -2 | -2 | -1 | 814.67  | 8.53  |
| -2 | -2 | 0  | 655.62  | 7.60  |
| -2 | -2 | 0  | 642.09  | 6.50  |
| -2 | -2 | 0  | 646.21  | 6.32  |
| -2 | -2 | 0  | 682.25  | 7.83  |
| -2 | -2 | 0  | 651.81  | 7.28  |
| -2 | -2 | 0  | 655.99  | 7.21  |
| -2 | -2 | 0  | 632.69  | 7.91  |
| -2 | -2 | 0  | 675.87  | 7.71  |
| -2 | -2 | 1  | 5.22    | 0.47  |
| -2 | -2 | 1  | 4.70    | 0.42  |
| -2 | -2 | 1  | 7.12    | 0.71  |
| -2 | -2 | 1  | 5.89    | 0.57  |
| -2 | -2 | 1  | 4.96    | 0.32  |
| -2 | -2 | 1  | 7.17    | 0.76  |
| -2 | -2 | 1  | 7.11    | 0.66  |
| -2 | -2 | 1  | 6.78    | 0.72  |
| -2 | -2 | 2  | 489.89  | 5.61  |
| -2 | -2 | 2  | 488.78  | 5.49  |



## CIF 31

|    |    |   |         |       |
|----|----|---|---------|-------|
| -2 | -2 | 2 | 451.26  | 4.74  |
| -2 | -2 | 2 | 535.61  | 5.93  |
| -2 | -2 | 2 | 450.73  | 5.84  |
| -2 | -2 | 2 | 471.94  | 6.31  |
| -2 | -2 | 2 | 467.45  | 6.22  |
| -2 | -2 | 2 | 537.42  | 6.17  |
| -2 | -2 | 3 | 2.86    | 0.60  |
| -2 | -2 | 3 | 5.60    | 0.65  |
| -2 | -2 | 3 | 2.40    | 0.35  |
| -2 | -2 | 3 | 3.83    | 0.57  |
| -2 | -2 | 3 | 1.07    | 0.47  |
| -2 | -2 | 3 | 1.33    | 0.44  |
| -2 | -2 | 3 | 0.95    | 0.53  |
| -2 | -2 | 3 | 2.13    | 0.61  |
| -2 | -2 | 3 | 3.46    | 0.62  |
| -2 | -2 | 4 | 4162.64 | 38.23 |
| -2 | -2 | 4 | 4016.11 | 38.24 |
| -2 | -2 | 4 | 4109.61 | 38.53 |
| -2 | -2 | 4 | 4912.18 | 38.48 |
| -2 | -2 | 4 | 4272.39 | 38.39 |
| -2 | -2 | 4 | 4568.06 | 37.22 |
| -2 | -2 | 4 | 4466.80 | 38.18 |
| -2 | -2 | 5 | 410.51  | 6.61  |
| -2 | -2 | 5 | 439.20  | 6.87  |
| -2 | -2 | 5 | 434.08  | 6.79  |
| -2 | -2 | 5 | 476.76  | 6.27  |
| -2 | -2 | 5 | 531.42  | 7.27  |
| -2 | -2 | 5 | 497.72  | 6.84  |
| -2 | -2 | 5 | 522.41  | 6.27  |
| -2 | -2 | 5 | 555.05  | 7.37  |
| -2 | -2 | 5 | 493.22  | 6.84  |
| -2 | -2 | 5 | 457.91  | 6.22  |
| -2 | -2 | 6 | 5780.35 | 54.22 |
| -2 | -2 | 6 | 5538.69 | 54.07 |
| -2 | -2 | 6 | 6445.82 | 54.57 |
| -2 | -2 | 6 | 5955.99 | 53.83 |
| -2 | -2 | 6 | 6991.91 | 53.65 |
| -2 | -2 | 6 | 6077.31 | 54.43 |
| -2 | -2 | 6 | 6490.40 | 54.23 |
| -2 | -2 | 6 | 6091.83 | 52.87 |
| -2 | -2 | 7 | 7880.00 | 65.53 |

## CIF 31

|    |    |    |         |       |
|----|----|----|---------|-------|
| -2 | -2 | 7  | 6468.10 | 65.53 |
| -2 | -2 | 7  | 7525.05 | 66.10 |
| -2 | -2 | 7  | 7911.78 | 65.71 |
| -2 | -2 | 7  | 8602.15 | 65.39 |
| -2 | -2 | 7  | 7831.06 | 66.40 |
| -2 | -2 | 7  | 7482.20 | 65.30 |
| -2 | -2 | 7  | 6861.46 | 63.60 |
| -2 | -2 | 8  | 1806.01 | 20.00 |
| -2 | -2 | 8  | 1677.64 | 19.11 |
| -2 | -2 | 8  | 1780.61 | 20.10 |
| -2 | -2 | 8  | 1681.42 | 19.78 |
| -2 | -2 | 8  | 1743.88 | 19.32 |
| -2 | -2 | 8  | 1707.59 | 18.83 |
| -2 | -2 | 8  | 1872.82 | 19.48 |
| -2 | -2 | 8  | 1841.12 | 17.39 |
| -2 | -2 | 9  | 74.48   | 3.47  |
| -2 | -2 | 9  | 63.61   | 2.99  |
| -2 | -2 | 9  | 67.44   | 2.85  |
| -2 | -2 | 9  | 64.52   | 3.16  |
| -2 | -2 | 9  | 67.66   | 2.91  |
| -2 | -2 | 9  | 62.55   | 2.76  |
| -2 | -2 | 9  | 72.19   | 3.31  |
| -2 | -2 | 9  | 74.48   | 2.47  |
| -2 | -2 | 9  | 77.43   | 3.06  |
| -2 | -2 | 10 | 2411.15 | 27.44 |
| -2 | -2 | 10 | 2481.89 | 25.99 |
| -2 | -2 | 10 | 2844.01 | 26.88 |
| -2 | -2 | 10 | 2477.01 | 27.19 |
| -2 | -2 | 10 | 2332.77 | 26.81 |
| -2 | -2 | 10 | 2259.65 | 25.80 |
| -2 | -2 | 10 | 1994.39 | 25.36 |
| -2 | -2 | 10 | 2431.37 | 27.42 |
| -2 | -2 | 10 | 2695.75 | 24.98 |
| -2 | -2 | 10 | 2533.17 | 25.54 |
| -2 | -2 | 11 | 24.87   | 1.99  |
| -2 | -2 | 11 | 37.73   | 2.27  |
| -2 | -2 | 11 | 31.84   | 2.43  |
| -2 | -2 | 11 | 31.34   | 2.59  |
| -2 | -2 | 11 | 33.29   | 2.42  |
| -2 | -2 | 11 | 27.70   | 2.24  |
| -2 | -2 | 11 | 31.97   | 2.18  |

## CIF 31

|    |    |     |        |      |
|----|----|-----|--------|------|
| -2 | -2 | 11  | 30.72  | 2.48 |
| -2 | -2 | 12  | 271.30 | 6.46 |
| -2 | -2 | 12  | 227.07 | 6.32 |
| -2 | -2 | 12  | 229.12 | 5.75 |
| -2 | -2 | 12  | 261.59 | 6.73 |
| -2 | -2 | 12  | 233.00 | 6.66 |
| -2 | -2 | 12  | 230.11 | 6.49 |
| -2 | -2 | 13  | 221.66 | 5.89 |
| -2 | -2 | 13  | 233.89 | 6.30 |
| -2 | -2 | 13  | 214.14 | 5.59 |
| -2 | -2 | 13  | 245.57 | 6.07 |
| -2 | -2 | 13  | 209.39 | 5.99 |
| -2 | -2 | 14  | 6.35   | 1.07 |
| -2 | -2 | 14  | 6.99   | 1.21 |
| -2 | -2 | 14  | 9.32   | 1.23 |
| -2 | -2 | 14  | 7.05   | 1.21 |
| -2 | -2 | 14  | 6.03   | 1.12 |
| -2 | -2 | 15  | 30.86  | 1.89 |
| -2 | -2 | 15  | 30.48  | 1.88 |
| -2 | -2 | 15  | 29.59  | 1.69 |
| -2 | -2 | 15  | 31.73  | 1.77 |
| -2 | -2 | 16  | 6.49   | 0.74 |
| -2 | -2 | 16  | 6.53   | 0.68 |
| -2 | -1 | -13 | 1.57   | 0.65 |
| -2 | -1 | -13 | 1.25   | 0.50 |
| -2 | -1 | -12 | 108.76 | 5.96 |
| -2 | -1 | -12 | 94.45  | 3.27 |
| -2 | -1 | -12 | 117.48 | 2.92 |
| -2 | -1 | -12 | 107.44 | 3.84 |
| -2 | -1 | -12 | 124.82 | 4.31 |
| -2 | -1 | -11 | 26.47  | 3.73 |
| -2 | -1 | -11 | 26.46  | 1.76 |
| -2 | -1 | -11 | 29.28  | 2.81 |
| -2 | -1 | -11 | 28.15  | 2.12 |
| -2 | -1 | -11 | 28.57  | 2.45 |
| -2 | -1 | -11 | 25.64  | 1.61 |
| -2 | -1 | -10 | 359.25 | 6.54 |
| -2 | -1 | -10 | 380.53 | 8.88 |
| -2 | -1 | -10 | 412.14 | 9.31 |
| -2 | -1 | -10 | 389.25 | 7.29 |
| -2 | -1 | -10 | 395.39 | 8.33 |

## CIF 31

|    |    |     |         |       |
|----|----|-----|---------|-------|
| -2 | -1 | -10 | 403.74  | 8.02  |
| -2 | -1 | -10 | 378.23  | 7.03  |
| -2 | -1 | -9  | 20.59   | 1.64  |
| -2 | -1 | -9  | 18.95   | 4.38  |
| -2 | -1 | -9  | 17.95   | 1.92  |
| -2 | -1 | -9  | 19.60   | 2.20  |
| -2 | -1 | -9  | 19.63   | 1.79  |
| -2 | -1 | -9  | 17.40   | 2.15  |
| -2 | -1 | -9  | 20.15   | 1.91  |
| -2 | -1 | -9  | 19.76   | 1.66  |
| -2 | -1 | -9  | 20.08   | 1.64  |
| -2 | -1 | -8  | 46.97   | 2.37  |
| -2 | -1 | -8  | 44.13   | 2.64  |
| -2 | -1 | -8  | 52.87   | 2.51  |
| -2 | -1 | -8  | 50.43   | 2.58  |
| -2 | -1 | -8  | 47.65   | 3.33  |
| -2 | -1 | -8  | 44.90   | 3.11  |
| -2 | -1 | -8  | 46.62   | 2.33  |
| -2 | -1 | -8  | 52.92   | 3.86  |
| -2 | -1 | -7  | 846.54  | 12.03 |
| -2 | -1 | -7  | 885.90  | 11.48 |
| -2 | -1 | -7  | 904.01  | 11.70 |
| -2 | -1 | -7  | 869.03  | 11.44 |
| -2 | -1 | -7  | 844.06  | 12.67 |
| -2 | -1 | -6  | 249.70  | 5.39  |
| -2 | -1 | -6  | 263.19  | 5.24  |
| -2 | -1 | -6  | 268.41  | 5.32  |
| -2 | -1 | -6  | 245.84  | 5.61  |
| -2 | -1 | -6  | 257.46  | 5.22  |
| -2 | -1 | -5  | 165.85  | 4.72  |
| -2 | -1 | -5  | 164.52  | 3.82  |
| -2 | -1 | -5  | 175.16  | 3.30  |
| -2 | -1 | -5  | 161.72  | 4.08  |
| -2 | -1 | -4  | 4912.50 | 42.35 |
| -2 | -1 | -3  | 1681.79 | 15.99 |
| -2 | -1 | -2  | 6391.17 | 53.74 |
| -2 | -1 | -1  | 369.12  | 4.87  |
| -2 | -1 | -1  | 386.75  | 4.85  |
| -2 | -1 | 0   | 50.64   | 1.20  |
| -2 | -1 | 0   | 50.55   | 1.16  |
| -2 | -1 | 0   | 50.55   | 1.43  |

## CIF 31

|    |    |   |         |       |
|----|----|---|---------|-------|
| -2 | -1 | 0 | 53.77   | 1.53  |
| -2 | -1 | 0 | 49.78   | 1.61  |
| -2 | -1 | 0 | 53.06   | 1.38  |
| -2 | -1 | 0 | 51.52   | 1.53  |
| -2 | -1 | 1 | 88.52   | 1.70  |
| -2 | -1 | 1 | 88.10   | 1.66  |
| -2 | -1 | 1 | 99.85   | 1.41  |
| -2 | -1 | 1 | 100.90  | 2.15  |
| -2 | -1 | 1 | 99.23   | 2.03  |
| -2 | -1 | 1 | 88.15   | 2.09  |
| -2 | -1 | 1 | 97.84   | 2.08  |
| -2 | -1 | 1 | 89.45   | 1.89  |
| -2 | -1 | 2 | 81.29   | 1.46  |
| -2 | -1 | 2 | 86.42   | 1.81  |
| -2 | -1 | 2 | 92.10   | 1.82  |
| -2 | -1 | 2 | 80.31   | 1.86  |
| -2 | -1 | 2 | 83.29   | 1.89  |
| -2 | -1 | 2 | 88.53   | 1.93  |
| -2 | -1 | 3 | 6743.13 | 56.53 |
| -2 | -1 | 3 | 6636.83 | 55.98 |
| -2 | -1 | 4 | 1073.68 | 11.81 |
| -2 | -1 | 4 | 1084.85 | 11.90 |
| -2 | -1 | 4 | 1123.77 | 11.39 |
| -2 | -1 | 4 | 1146.74 | 12.02 |
| -2 | -1 | 4 | 1150.04 | 11.27 |
| -2 | -1 | 4 | 1160.98 | 11.30 |
| -2 | -1 | 5 | 4329.06 | 40.23 |
| -2 | -1 | 5 | 4390.05 | 39.52 |
| -2 | -1 | 6 | 19.37   | 1.45  |
| -2 | -1 | 6 | 22.90   | 1.30  |
| -2 | -1 | 6 | 23.79   | 1.36  |
| -2 | -1 | 6 | 21.24   | 0.97  |
| -2 | -1 | 7 | 136.51  | 3.76  |
| -2 | -1 | 7 | 139.25  | 3.97  |
| -2 | -1 | 7 | 175.78  | 4.23  |
| -2 | -1 | 7 | 167.37  | 3.86  |
| -2 | -1 | 7 | 162.04  | 4.22  |
| -2 | -1 | 7 | 174.05  | 3.78  |
| -2 | -1 | 7 | 154.81  | 2.67  |
| -2 | -1 | 8 | 90.73   | 3.03  |
| -2 | -1 | 8 | 100.67  | 3.45  |

## CIF 31

|    |    |    |        |      |
|----|----|----|--------|------|
| -2 | -1 | 8  | 102.23 | 3.65 |
| -2 | -1 | 8  | 99.05  | 3.45 |
| -2 | -1 | 8  | 105.15 | 3.28 |
| -2 | -1 | 8  | 100.56 | 3.66 |
| -2 | -1 | 8  | 116.91 | 2.93 |
| -2 | -1 | 8  | 124.60 | 3.31 |
| -2 | -1 | 9  | 292.38 | 6.36 |
| -2 | -1 | 9  | 281.71 | 5.76 |
| -2 | -1 | 9  | 276.42 | 6.42 |
| -2 | -1 | 9  | 259.40 | 6.10 |
| -2 | -1 | 9  | 258.78 | 6.42 |
| -2 | -1 | 9  | 273.66 | 5.15 |
| -2 | -1 | 9  | 274.83 | 5.24 |
| -2 | -1 | 10 | 7.42   | 1.23 |
| -2 | -1 | 10 | 8.34   | 1.55 |
| -2 | -1 | 10 | 7.42   | 1.58 |
| -2 | -1 | 10 | 7.41   | 1.34 |
| -2 | -1 | 10 | 8.95   | 1.03 |
| -2 | -1 | 11 | 21.97  | 2.20 |
| -2 | -1 | 11 | 24.27  | 2.03 |
| -2 | -1 | 11 | 26.11  | 2.09 |
| -2 | -1 | 11 | 19.74  | 1.54 |
| -2 | -1 | 11 | 19.96  | 2.01 |
| -2 | -1 | 11 | 23.78  | 2.03 |
| -2 | -1 | 11 | 28.80  | 2.54 |
| -2 | -1 | 11 | 33.64  | 2.45 |
| -2 | -1 | 12 | 180.99 | 5.06 |
| -2 | -1 | 12 | 194.73 | 5.28 |
| -2 | -1 | 12 | 207.28 | 5.63 |
| -2 | -1 | 12 | 183.79 | 5.73 |
| -2 | -1 | 12 | 218.12 | 5.81 |
| -2 | -1 | 12 | 176.55 | 5.29 |
| -2 | -1 | 12 | 183.05 | 5.83 |
| -2 | -1 | 13 | 82.97  | 3.37 |
| -2 | -1 | 13 | 80.18  | 3.63 |
| -2 | -1 | 13 | 85.27  | 3.33 |
| -2 | -1 | 13 | 82.35  | 3.27 |
| -2 | -1 | 13 | 95.27  | 3.68 |
| -2 | -1 | 13 | 89.18  | 3.92 |
| -2 | -1 | 14 | 66.53  | 3.07 |
| -2 | -1 | 14 | 67.50  | 2.81 |

## CIF 31

|    |    |     |        |       |
|----|----|-----|--------|-------|
| -2 | -1 | 14  | 60.23  | 2.75  |
| -2 | -1 | 14  | 61.32  | 2.95  |
| -2 | -1 | 15  | 18.97  | 1.42  |
| -2 | -1 | 15  | 18.99  | 1.21  |
| -2 | -1 | 15  | 18.31  | 1.43  |
| -2 | 0  | -13 | 150.87 | 3.98  |
| -2 | 0  | -13 | 144.75 | 5.32  |
| -2 | 0  | -13 | 134.98 | 3.57  |
| -2 | 0  | -13 | 157.34 | 3.53  |
| -2 | 0  | -13 | 130.06 | 3.56  |
| -2 | 0  | -12 | 23.85  | 2.07  |
| -2 | 0  | -12 | 23.69  | 1.83  |
| -2 | 0  | -12 | 32.06  | 2.43  |
| -2 | 0  | -12 | 30.03  | 1.91  |
| -2 | 0  | -12 | 24.07  | 2.49  |
| -2 | 0  | -11 | 130.10 | 4.61  |
| -2 | 0  | -11 | 130.50 | 4.98  |
| -2 | 0  | -11 | 154.46 | 4.47  |
| -2 | 0  | -11 | 142.61 | 3.89  |
| -2 | 0  | -11 | 143.06 | 6.86  |
| -2 | 0  | -11 | 138.49 | 5.11  |
| -2 | 0  | -11 | 147.69 | 4.59  |
| -2 | 0  | -11 | 132.26 | 3.85  |
| -2 | 0  | -10 | 139.81 | 5.32  |
| -2 | 0  | -10 | 133.57 | 4.75  |
| -2 | 0  | -10 | 147.62 | 4.19  |
| -2 | 0  | -10 | 139.39 | 4.63  |
| -2 | 0  | -10 | 142.63 | 4.47  |
| -2 | 0  | -10 | 140.26 | 4.18  |
| -2 | 0  | -10 | 133.55 | 3.80  |
| -2 | 0  | -9  | 883.83 | 11.37 |
| -2 | 0  | -9  | 882.21 | 14.37 |
| -2 | 0  | -9  | 880.86 | 13.47 |
| -2 | 0  | -9  | 868.62 | 11.91 |
| -2 | 0  | -9  | 857.90 | 12.45 |
| -2 | 0  | -9  | 824.53 | 12.28 |
| -2 | 0  | -9  | 835.09 | 11.89 |
| -2 | 0  | -9  | 867.73 | 13.57 |
| -2 | 0  | -9  | 800.50 | 11.42 |
| -2 | 0  | -8  | 58.26  | 2.54  |
| -2 | 0  | -8  | 56.10  | 3.07  |

## CIF 31

|    |   |    |         |       |
|----|---|----|---------|-------|
| -2 | 0 | -8 | 56.93   | 2.43  |
| -2 | 0 | -8 | 64.82   | 3.52  |
| -2 | 0 | -8 | 61.99   | 2.65  |
| -2 | 0 | -8 | 57.99   | 2.68  |
| -2 | 0 | -8 | 60.81   | 2.76  |
| -2 | 0 | -8 | 58.87   | 2.58  |
| -2 | 0 | -7 | 1227.02 | 14.47 |
| -2 | 0 | -7 | 1230.29 | 15.32 |
| -2 | 0 | -7 | 1212.48 | 14.14 |
| -2 | 0 | -7 | 1161.42 | 15.25 |
| -2 | 0 | -7 | 1292.63 | 16.93 |
| -2 | 0 | -7 | 1255.48 | 15.57 |
| -2 | 0 | -7 | 1290.06 | 14.57 |
| -2 | 0 | -7 | 1202.27 | 14.68 |
| -2 | 0 | -7 | 1237.03 | 14.35 |
| -2 | 0 | -6 | 893.31  | 11.09 |
| -2 | 0 | -6 | 894.21  | 11.65 |
| -2 | 0 | -6 | 910.40  | 11.05 |
| -2 | 0 | -6 | 884.24  | 10.84 |
| -2 | 0 | -6 | 846.45  | 11.74 |
| -2 | 0 | -6 | 858.03  | 11.20 |
| -2 | 0 | -6 | 913.87  | 11.33 |
| -2 | 0 | -6 | 919.97  | 11.53 |
| -2 | 0 | -5 | 3365.88 | 30.37 |
| -2 | 0 | -5 | 3190.15 | 30.32 |
| -2 | 0 | -4 | 858.41  | 8.67  |
| -2 | 0 | -3 | 11.98   | 0.51  |
| -2 | 0 | -3 | 4.94    | 0.49  |
| -2 | 0 | -2 | 2434.34 | 21.03 |
| -2 | 0 | -2 | 2816.76 | 22.20 |
| -2 | 0 | -1 | 1914.93 | 16.00 |
| -2 | 0 | -1 | 1974.83 | 17.12 |
| -2 | 0 | 0  | 542.03  | 5.61  |
| -2 | 0 | 0  | 561.62  | 5.90  |
| -2 | 0 | 0  | 573.02  | 5.95  |
| -2 | 0 | 0  | 605.62  | 6.14  |
| -2 | 0 | 0  | 619.87  | 6.43  |
| -2 | 0 | 0  | 591.33  | 6.15  |
| -2 | 0 | 0  | 623.14  | 6.13  |
| -2 | 0 | 1  | 419.45  | 4.34  |
| -2 | 0 | 1  | 388.43  | 4.28  |



## CIF 31

|    |   |   |         |       |
|----|---|---|---------|-------|
| -2 | 0 | 1 | 428.31  | 4.63  |
| -2 | 0 | 1 | 420.03  | 4.59  |
| -2 | 0 | 1 | 413.50  | 3.71  |
| -2 | 0 | 1 | 419.60  | 4.93  |
| -2 | 0 | 1 | 454.68  | 4.77  |
| -2 | 0 | 1 | 379.38  | 5.09  |
| -2 | 0 | 2 | 282.31  | 3.31  |
| -2 | 0 | 2 | 285.71  | 3.59  |
| -2 | 0 | 2 | 270.60  | 3.51  |
| -2 | 0 | 2 | 263.03  | 3.28  |
| -2 | 0 | 2 | 270.77  | 3.80  |
| -2 | 0 | 2 | 264.83  | 3.65  |
| -2 | 0 | 2 | 270.37  | 3.53  |
| -2 | 0 | 3 | 4577.27 | 38.37 |
| -2 | 0 | 3 | 4425.73 | 37.96 |
| -2 | 0 | 3 | 4548.68 | 38.43 |
| -2 | 0 | 3 | 4509.45 | 38.65 |
| -2 | 0 | 4 | 1636.15 | 15.73 |
| -2 | 0 | 4 | 1791.79 | 16.26 |
| -2 | 0 | 4 | 1573.88 | 15.05 |
| -2 | 0 | 4 | 1750.81 | 16.66 |
| -2 | 0 | 4 | 1687.94 | 16.51 |
| -2 | 0 | 4 | 1723.01 | 15.01 |
| -2 | 0 | 4 | 1805.85 | 15.80 |
| -2 | 0 | 4 | 1650.95 | 15.73 |
| -2 | 0 | 4 | 1689.68 | 14.94 |
| -2 | 0 | 5 | 703.67  | 8.51  |
| -2 | 0 | 5 | 659.51  | 8.46  |
| -2 | 0 | 5 | 698.10  | 8.04  |
| -2 | 0 | 5 | 718.44  | 8.88  |
| -2 | 0 | 5 | 682.45  | 7.34  |
| -2 | 0 | 5 | 743.10  | 7.86  |
| -2 | 0 | 5 | 729.11  | 7.79  |
| -2 | 0 | 6 | 1115.25 | 12.60 |
| -2 | 0 | 6 | 1184.70 | 12.93 |
| -2 | 0 | 6 | 1175.37 | 12.48 |
| -2 | 0 | 6 | 1043.59 | 12.81 |
| -2 | 0 | 6 | 1137.81 | 13.29 |
| -2 | 0 | 6 | 1078.12 | 12.42 |
| -2 | 0 | 6 | 1232.55 | 11.83 |
| -2 | 0 | 6 | 1137.31 | 11.90 |

## CIF 31

|    |   |    |         |       |
|----|---|----|---------|-------|
| -2 | 0 | 6  | 1165.83 | 11.67 |
| -2 | 0 | 7  | 2981.67 | 29.60 |
| -2 | 0 | 7  | 3103.74 | 29.24 |
| -2 | 0 | 7  | 3157.27 | 29.63 |
| -2 | 0 | 7  | 2887.65 | 28.50 |
| -2 | 0 | 7  | 2981.17 | 30.03 |
| -2 | 0 | 7  | 2731.84 | 28.97 |
| -2 | 0 | 7  | 3459.22 | 28.46 |
| -2 | 0 | 7  | 3240.36 | 28.02 |
| -2 | 0 | 8  | 1203.62 | 15.08 |
| -2 | 0 | 8  | 1296.30 | 15.09 |
| -2 | 0 | 8  | 1365.16 | 15.33 |
| -2 | 0 | 8  | 1388.00 | 16.14 |
| -2 | 0 | 8  | 1331.63 | 16.36 |
| -2 | 0 | 8  | 1415.16 | 14.64 |
| -2 | 0 | 8  | 1296.42 | 13.72 |
| -2 | 0 | 9  | 70.36   | 2.81  |
| -2 | 0 | 9  | 66.52   | 2.80  |
| -2 | 0 | 9  | 65.97   | 2.85  |
| -2 | 0 | 9  | 58.71   | 3.02  |
| -2 | 0 | 9  | 54.33   | 3.01  |
| -2 | 0 | 9  | 61.62   | 2.43  |
| -2 | 0 | 10 | 469.74  | 8.53  |
| -2 | 0 | 10 | 410.59  | 8.10  |
| -2 | 0 | 10 | 464.25  | 8.08  |
| -2 | 0 | 10 | 465.81  | 8.39  |
| -2 | 0 | 10 | 398.29  | 8.69  |
| -2 | 0 | 10 | 438.19  | 9.28  |
| -2 | 0 | 10 | 465.34  | 7.82  |
| -2 | 0 | 11 | 2238.20 | 23.68 |
| -2 | 0 | 11 | 2050.95 | 22.60 |
| -2 | 0 | 11 | 2314.14 | 24.08 |
| -2 | 0 | 11 | 1858.28 | 22.68 |
| -2 | 0 | 11 | 1978.84 | 24.33 |
| -2 | 0 | 11 | 1991.32 | 25.23 |
| -2 | 0 | 12 | 4.81    | 1.18  |
| -2 | 0 | 12 | 5.09    | 0.99  |
| -2 | 0 | 12 | 5.04    | 1.12  |
| -2 | 0 | 12 | 5.63    | 1.10  |
| -2 | 0 | 12 | 4.21    | 1.16  |
| -2 | 0 | 12 | 5.96    | 1.50  |

## CIF 31

|    |   |     |        |      |
|----|---|-----|--------|------|
| -2 | 0 | 13  | 202.89 | 5.78 |
| -2 | 0 | 13  | 197.26 | 5.00 |
| -2 | 0 | 13  | 213.04 | 5.38 |
| -2 | 0 | 13  | 220.06 | 5.34 |
| -2 | 0 | 13  | 206.11 | 6.02 |
| -2 | 0 | 14  | 316.80 | 6.79 |
| -2 | 0 | 14  | 324.13 | 6.56 |
| -2 | 0 | 14  | 299.78 | 5.88 |
| -2 | 0 | 14  | 323.22 | 6.88 |
| -2 | 0 | 15  | 67.79  | 2.14 |
| -2 | 0 | 15  | 78.03  | 2.61 |
| -2 | 1 | -14 | 141.56 | 3.92 |
| -2 | 1 | -14 | 128.76 | 2.92 |
| -2 | 1 | -13 | 148.95 | 4.44 |
| -2 | 1 | -13 | 141.07 | 3.98 |
| -2 | 1 | -13 | 152.70 | 3.89 |
| -2 | 1 | -13 | 140.11 | 3.54 |
| -2 | 1 | -12 | 1.39   | 1.29 |
| -2 | 1 | -12 | 1.23   | 0.84 |
| -2 | 1 | -12 | 1.82   | 1.12 |
| -2 | 1 | -12 | 3.04   | 0.95 |
| -2 | 1 | -12 | 0.48   | 4.88 |
| -2 | 1 | -12 | 2.86   | 1.02 |
| -2 | 1 | -12 | 2.57   | 0.79 |
| -2 | 1 | -11 | 14.90  | 3.14 |
| -2 | 1 | -11 | 11.59  | 1.63 |
| -2 | 1 | -11 | 12.53  | 1.86 |
| -2 | 1 | -11 | 13.99  | 1.66 |
| -2 | 1 | -11 | 12.03  | 1.37 |
| -2 | 1 | -11 | 15.87  | 1.70 |
| -2 | 1 | -10 | 157.94 | 5.54 |
| -2 | 1 | -10 | 147.02 | 4.02 |
| -2 | 1 | -10 | 164.58 | 5.30 |
| -2 | 1 | -10 | 143.95 | 4.91 |
| -2 | 1 | -10 | 146.17 | 4.55 |
| -2 | 1 | -10 | 160.29 | 6.76 |
| -2 | 1 | -10 | 148.95 | 4.41 |
| -2 | 1 | -10 | 139.97 | 3.98 |
| -2 | 1 | -10 | 150.25 | 7.82 |
| -2 | 1 | -9  | 137.07 | 5.38 |
| -2 | 1 | -9  | 137.00 | 4.67 |

## CIF 31

|    |   |    |         |       |
|----|---|----|---------|-------|
| -2 | 1 | -9 | 128.06  | 3.75  |
| -2 | 1 | -9 | 122.18  | 4.44  |
| -2 | 1 | -9 | 132.78  | 4.76  |
| -2 | 1 | -9 | 128.69  | 3.98  |
| -2 | 1 | -9 | 124.97  | 3.82  |
| -2 | 1 | -8 | 613.47  | 10.66 |
| -2 | 1 | -8 | 535.37  | 9.33  |
| -2 | 1 | -8 | 621.70  | 9.98  |
| -2 | 1 | -8 | 619.90  | 10.87 |
| -2 | 1 | -8 | 565.06  | 8.30  |
| -2 | 1 | -8 | 487.14  | 9.15  |
| -2 | 1 | -8 | 481.52  | 8.77  |
| -2 | 1 | -8 | 542.35  | 8.54  |
| -2 | 1 | -8 | 527.47  | 8.40  |
| -2 | 1 | -7 | 17.88   | 1.38  |
| -2 | 1 | -7 | 18.51   | 1.54  |
| -2 | 1 | -7 | 18.59   | 1.63  |
| -2 | 1 | -7 | 17.48   | 1.76  |
| -2 | 1 | -7 | 18.75   | 1.82  |
| -2 | 1 | -7 | 20.04   | 1.35  |
| -2 | 1 | -7 | 20.73   | 1.63  |
| -2 | 1 | -7 | 22.89   | 1.48  |
| -2 | 1 | -7 | 18.55   | 1.57  |
| -2 | 1 | -6 | 4437.54 | 42.59 |
| -2 | 1 | -6 | 4860.48 | 45.10 |
| -2 | 1 | -6 | 5403.32 | 45.06 |
| -2 | 1 | -6 | 5396.42 | 43.59 |
| -2 | 1 | -6 | 4120.78 | 41.67 |
| -2 | 1 | -6 | 4980.38 | 44.59 |
| -2 | 1 | -6 | 4306.80 | 42.21 |
| -2 | 1 | -5 | 9.77    | 0.76  |
| -2 | 1 | -4 | 187.02  | 2.94  |
| -2 | 1 | -3 | 190.36  | 2.70  |
| -2 | 1 | -2 | 784.41  | 7.42  |
| -2 | 1 | -1 | 43.40   | 0.93  |
| -2 | 1 | -1 | 45.81   | 1.44  |
| -2 | 1 | 0  | 281.48  | 2.68  |
| -2 | 1 | 0  | 286.66  | 3.50  |
| -2 | 1 | 0  | 287.55  | 3.54  |
| -2 | 1 | 0  | 276.71  | 3.40  |
| -2 | 1 | 0  | 293.77  | 3.70  |

## CIF 31

|    |   |   |         |       |
|----|---|---|---------|-------|
| -2 | 1 | 0 | 287.71  | 3.14  |
| -2 | 1 | 0 | 285.04  | 4.00  |
| -2 | 1 | 1 | 690.54  | 6.25  |
| -2 | 1 | 1 | 698.11  | 7.05  |
| -2 | 1 | 2 | 6016.42 | 48.99 |
| -2 | 1 | 2 | 5634.13 | 48.86 |
| -2 | 1 | 3 | 584.39  | 6.43  |
| -2 | 1 | 3 | 614.40  | 6.59  |
| -2 | 1 | 3 | 611.73  | 7.20  |
| -2 | 1 | 3 | 589.42  | 6.01  |
| -2 | 1 | 3 | 582.47  | 6.02  |
| -2 | 1 | 3 | 625.21  | 7.01  |
| -2 | 1 | 4 | 2513.35 | 21.70 |
| -2 | 1 | 4 | 2724.48 | 22.13 |
| -2 | 1 | 4 | 2165.49 | 21.03 |
| -2 | 1 | 4 | 2321.42 | 20.81 |
| -2 | 1 | 4 | 2533.94 | 22.23 |
| -2 | 1 | 5 | 6.89    | 0.70  |
| -2 | 1 | 5 | 7.36    | 0.83  |
| -2 | 1 | 5 | 7.09    | 0.75  |
| -2 | 1 | 5 | 5.96    | 0.70  |
| -2 | 1 | 5 | 7.08    | 0.64  |
| -2 | 1 | 5 | 6.34    | 0.51  |
| -2 | 1 | 5 | 7.39    | 0.78  |
| -2 | 1 | 6 | 491.74  | 5.75  |
| -2 | 1 | 6 | 563.17  | 7.09  |
| -2 | 1 | 6 | 514.59  | 7.47  |
| -2 | 1 | 6 | 473.67  | 6.91  |
| -2 | 1 | 6 | 497.89  | 7.03  |
| -2 | 1 | 6 | 568.63  | 6.86  |
| -2 | 1 | 6 | 537.67  | 8.19  |
| -2 | 1 | 6 | 511.13  | 6.96  |
| -2 | 1 | 7 | 6032.17 | 53.98 |
| -2 | 1 | 7 | 6027.95 | 54.38 |
| -2 | 1 | 7 | 6570.49 | 54.30 |
| -2 | 1 | 7 | 6248.95 | 53.76 |
| -2 | 1 | 7 | 5888.82 | 55.65 |
| -2 | 1 | 7 | 6629.33 | 53.62 |
| -2 | 1 | 7 | 5663.09 | 53.19 |
| -2 | 1 | 8 | 41.03   | 2.26  |
| -2 | 1 | 8 | 46.91   | 2.10  |

## CIF 31

|    |   |     |        |      |
|----|---|-----|--------|------|
| -2 | 1 | 8   | 42.61  | 2.19 |
| -2 | 1 | 8   | 45.48  | 2.15 |
| -2 | 1 | 8   | 41.11  | 2.52 |
| -2 | 1 | 8   | 47.55  | 2.03 |
| -2 | 1 | 9   | 90.22  | 3.14 |
| -2 | 1 | 9   | 77.65  | 3.19 |
| -2 | 1 | 9   | 89.00  | 2.96 |
| -2 | 1 | 9   | 95.50  | 3.38 |
| -2 | 1 | 9   | 72.73  | 3.59 |
| -2 | 1 | 9   | 85.70  | 3.00 |
| -2 | 1 | 10  | 155.41 | 4.66 |
| -2 | 1 | 10  | 168.00 | 4.23 |
| -2 | 1 | 10  | 162.06 | 4.45 |
| -2 | 1 | 10  | 179.70 | 4.89 |
| -2 | 1 | 10  | 148.28 | 5.26 |
| -2 | 1 | 10  | 177.85 | 4.80 |
| -2 | 1 | 10  | 175.28 | 4.66 |
| -2 | 1 | 11  | 45.99  | 2.55 |
| -2 | 1 | 11  | 32.26  | 2.66 |
| -2 | 1 | 11  | 42.54  | 2.47 |
| -2 | 1 | 11  | 33.70  | 2.88 |
| -2 | 1 | 12  | 2.54   | 1.00 |
| -2 | 1 | 12  | 5.86   | 1.14 |
| -2 | 1 | 12  | 4.28   | 1.07 |
| -2 | 1 | 12  | 3.77   | 1.30 |
| -2 | 1 | 12  | 3.30   | 1.30 |
| -2 | 1 | 13  | 2.04   | 1.08 |
| -2 | 1 | 13  | 1.71   | 0.87 |
| -2 | 1 | 13  | 2.19   | 0.80 |
| -2 | 1 | 13  | 2.19   | 0.96 |
| -2 | 1 | 13  | 3.62   | 1.23 |
| -2 | 1 | 14  | 319.24 | 6.39 |
| -2 | 1 | 14  | 302.80 | 5.92 |
| -2 | 2 | -14 | 257.20 | 4.37 |
| -2 | 2 | -14 | 248.91 | 4.99 |
| -2 | 2 | -13 | 52.51  | 4.76 |
| -2 | 2 | -13 | 58.10  | 2.89 |
| -2 | 2 | -13 | 53.63  | 2.61 |
| -2 | 2 | -13 | 50.29  | 2.30 |
| -2 | 2 | -13 | 57.15  | 2.33 |
| -2 | 2 | -13 | 48.12  | 1.96 |

## CIF 31

|    |   |     |        |      |
|----|---|-----|--------|------|
| -2 | 2 | -12 | 29.52  | 1.99 |
| -2 | 2 | -12 | 22.03  | 2.02 |
| -2 | 2 | -12 | 24.14  | 2.04 |
| -2 | 2 | -12 | 29.56  | 2.07 |
| -2 | 2 | -12 | 26.48  | 3.35 |
| -2 | 2 | -12 | 25.27  | 1.76 |
| -2 | 2 | -11 | 2.47   | 1.27 |
| -2 | 2 | -11 | 2.75   | 1.09 |
| -2 | 2 | -11 | 1.65   | 0.92 |
| -2 | 2 | -11 | 1.08   | 1.12 |
| -2 | 2 | -11 | 1.29   | 0.84 |
| -2 | 2 | -10 | 16.93  | 1.88 |
| -2 | 2 | -10 | 21.83  | 1.91 |
| -2 | 2 | -10 | 17.37  | 2.02 |
| -2 | 2 | -10 | 25.11  | 2.17 |
| -2 | 2 | -10 | 25.82  | 4.69 |
| -2 | 2 | -10 | 21.84  | 1.76 |
| -2 | 2 | -9  | 476.48 | 9.91 |
| -2 | 2 | -9  | 431.67 | 7.52 |
| -2 | 2 | -9  | 502.52 | 9.39 |
| -2 | 2 | -9  | 454.11 | 8.31 |
| -2 | 2 | -9  | 507.89 | 9.13 |
| -2 | 2 | -9  | 461.68 | 9.52 |
| -2 | 2 | -9  | 501.00 | 9.18 |
| -2 | 2 | -9  | 527.41 | 8.51 |
| -2 | 2 | -9  | 472.05 | 7.97 |
| -2 | 2 | -8  | 134.98 | 4.38 |
| -2 | 2 | -8  | 130.74 | 5.06 |
| -2 | 2 | -8  | 133.37 | 4.78 |
| -2 | 2 | -8  | 131.99 | 4.65 |
| -2 | 2 | -8  | 141.94 | 4.42 |
| -2 | 2 | -8  | 142.35 | 4.36 |
| -2 | 2 | -8  | 133.60 | 3.66 |
| -2 | 2 | -8  | 140.43 | 3.87 |
| -2 | 2 | -8  | 124.84 | 4.07 |
| -2 | 2 | -8  | 132.32 | 3.78 |
| -2 | 2 | -7  | 35.11  | 2.07 |
| -2 | 2 | -7  | 29.72  | 2.32 |
| -2 | 2 | -7  | 33.34  | 2.23 |
| -2 | 2 | -7  | 31.11  | 1.96 |
| -2 | 2 | -7  | 27.08  | 2.14 |

## CIF 31

|    |   |    |         |       |
|----|---|----|---------|-------|
| -2 | 2 | -7 | 35.88   | 1.82  |
| -2 | 2 | -7 | 34.60   | 1.72  |
| -2 | 2 | -7 | 36.25   | 2.11  |
| -2 | 2 | -7 | 36.13   | 1.80  |
| -2 | 2 | -7 | 27.86   | 1.88  |
| -2 | 2 | -7 | 35.51   | 1.87  |
| -2 | 2 | -6 | 183.15  | 4.71  |
| -2 | 2 | -6 | 170.38  | 3.68  |
| -2 | 2 | -6 | 181.65  | 4.30  |
| -2 | 2 | -6 | 181.22  | 5.23  |
| -2 | 2 | -5 | 1.42    | 0.50  |
| -2 | 2 | -4 | 3235.26 | 28.51 |
| -2 | 2 | -4 | 3255.91 | 27.95 |
| -2 | 2 | -3 | 964.50  | 9.73  |
| -2 | 2 | -3 | 955.69  | 9.60  |
| -2 | 2 | -2 | 100.86  | 1.85  |
| -2 | 2 | -2 | 99.93   | 2.08  |
| -2 | 2 | -2 | 100.32  | 2.35  |
| -2 | 2 | -1 | 313.67  | 3.66  |
| -2 | 2 | -1 | 336.06  | 4.43  |
| -2 | 2 | -1 | 311.65  | 4.05  |
| -2 | 2 | -1 | 293.54  | 3.69  |
| -2 | 2 | -1 | 329.71  | 3.87  |
| -2 | 2 | -1 | 337.52  | 4.02  |
| -2 | 2 | -1 | 355.22  | 4.68  |
| -2 | 2 | 0  | 5478.31 | 42.82 |
| -2 | 2 | 0  | 4964.19 | 42.10 |
| -2 | 2 | 0  | 4813.25 | 40.80 |
| -2 | 2 | 0  | 5418.81 | 43.01 |
| -2 | 2 | 0  | 5577.32 | 42.76 |
| -2 | 2 | 1  | 631.10  | 6.43  |
| -2 | 2 | 1  | 735.04  | 7.04  |
| -2 | 2 | 1  | 737.60  | 7.71  |
| -2 | 2 | 1  | 649.76  | 6.87  |
| -2 | 2 | 1  | 731.92  | 7.21  |
| -2 | 2 | 1  | 647.60  | 6.83  |
| -2 | 2 | 1  | 782.88  | 7.84  |
| -2 | 2 | 2  | 623.02  | 6.59  |
| -2 | 2 | 2  | 705.08  | 7.66  |
| -2 | 2 | 2  | 596.24  | 6.76  |
| -2 | 2 | 2  | 684.01  | 6.80  |



## CIF 31

|    |   |   |         |       |
|----|---|---|---------|-------|
| -2 | 2 | 2 | 683.08  | 7.36  |
| -2 | 2 | 2 | 676.17  | 7.28  |
| -2 | 2 | 2 | 635.93  | 6.71  |
| -2 | 2 | 3 | 2847.44 | 24.64 |
| -2 | 2 | 3 | 2697.69 | 24.70 |
| -2 | 2 | 3 | 2697.55 | 25.00 |
| -2 | 2 | 3 | 2834.14 | 25.12 |
| -2 | 2 | 3 | 2964.72 | 25.84 |
| -2 | 2 | 3 | 3127.30 | 25.52 |
| -2 | 2 | 3 | 2766.82 | 24.90 |
| -2 | 2 | 3 | 3058.89 | 26.19 |
| -2 | 2 | 4 | 326.43  | 4.42  |
| -2 | 2 | 4 | 368.58  | 4.75  |
| -2 | 2 | 4 | 347.29  | 5.18  |
| -2 | 2 | 4 | 342.26  | 4.87  |
| -2 | 2 | 4 | 381.28  | 5.63  |
| -2 | 2 | 4 | 335.83  | 4.46  |
| -2 | 2 | 4 | 356.99  | 4.78  |
| -2 | 2 | 4 | 375.82  | 4.91  |
| -2 | 2 | 5 | 317.94  | 4.59  |
| -2 | 2 | 5 | 361.87  | 4.99  |
| -2 | 2 | 5 | 324.69  | 4.57  |
| -2 | 2 | 5 | 354.96  | 5.21  |
| -2 | 2 | 5 | 324.80  | 5.21  |
| -2 | 2 | 5 | 372.25  | 5.22  |
| -2 | 2 | 5 | 321.96  | 5.51  |
| -2 | 2 | 6 | 91.75   | 2.64  |
| -2 | 2 | 6 | 112.19  | 2.58  |
| -2 | 2 | 6 | 110.74  | 2.68  |
| -2 | 2 | 6 | 112.41  | 2.92  |
| -2 | 2 | 6 | 105.84  | 2.83  |
| -2 | 2 | 6 | 98.07   | 2.70  |
| -2 | 2 | 6 | 100.42  | 3.02  |
| -2 | 2 | 7 | 580.41  | 8.81  |
| -2 | 2 | 7 | 635.18  | 7.99  |
| -2 | 2 | 7 | 661.33  | 8.40  |
| -2 | 2 | 7 | 663.11  | 8.89  |
| -2 | 2 | 7 | 568.76  | 9.30  |
| -2 | 2 | 7 | 595.39  | 8.70  |
| -2 | 2 | 7 | 645.28  | 8.66  |
| -2 | 2 | 8 | 3.52    | 0.66  |

## CIF 31

|    |   |     |         |       |
|----|---|-----|---------|-------|
| -2 | 2 | 8   | 4.04    | 0.73  |
| -2 | 2 | 8   | 2.91    | 0.96  |
| -2 | 2 | 8   | 3.92    | 0.89  |
| -2 | 2 | 8   | 1.72    | 1.12  |
| -2 | 2 | 8   | 2.93    | 0.80  |
| -2 | 2 | 9   | 3785.10 | 39.34 |
| -2 | 2 | 9   | 3731.48 | 38.62 |
| -2 | 2 | 9   | 3674.62 | 40.41 |
| -2 | 2 | 10  | 458.68  | 8.14  |
| -2 | 2 | 10  | 400.64  | 8.42  |
| -2 | 2 | 10  | 367.33  | 7.71  |
| -2 | 2 | 10  | 438.99  | 9.60  |
| -2 | 2 | 11  | 382.83  | 7.90  |
| -2 | 2 | 11  | 377.56  | 8.99  |
| -2 | 2 | 12  | 189.74  | 5.52  |
| -2 | 2 | 12  | 210.30  | 5.14  |
| -2 | 2 | 12  | 197.22  | 6.02  |
| -2 | 2 | 12  | 211.13  | 5.38  |
| -2 | 2 | 12  | 187.59  | 6.17  |
| -2 | 2 | 13  | 140.38  | 3.93  |
| -2 | 2 | 13  | 150.14  | 4.33  |
| -2 | 2 | 13  | 136.81  | 4.48  |
| -2 | 2 | 13  | 149.81  | 4.90  |
| -2 | 2 | 14  | 46.88   | 2.21  |
| -2 | 2 | 14  | 45.89   | 2.13  |
| -2 | 3 | -14 | 12.05   | 1.15  |
| -2 | 3 | -14 | 10.41   | 0.97  |
| -2 | 3 | -14 | 11.49   | 0.94  |
| -2 | 3 | -13 | 9.95    | 1.39  |
| -2 | 3 | -13 | 11.57   | 1.22  |
| -2 | 3 | -13 | 10.95   | 1.25  |
| -2 | 3 | -13 | 10.40   | 3.25  |
| -2 | 3 | -13 | 10.31   | 1.11  |
| -2 | 3 | -12 | 1.65    | 1.03  |
| -2 | 3 | -12 | 4.24    | 0.98  |
| -2 | 3 | -12 | 3.72    | 0.98  |
| -2 | 3 | -12 | 3.00    | 1.37  |
| -2 | 3 | -11 | 9.71    | 1.42  |
| -2 | 3 | -11 | 6.60    | 1.38  |
| -2 | 3 | -11 | 7.61    | 1.51  |
| -2 | 3 | -11 | 12.03   | 3.16  |

## CIF 31

|    |   |     |         |       |
|----|---|-----|---------|-------|
| -2 | 3 | -11 | 6.99    | 1.67  |
| -2 | 3 | -11 | 8.83    | 1.54  |
| -2 | 3 | -11 | 10.00   | 1.34  |
| -2 | 3 | -10 | 215.11  | 5.63  |
| -2 | 3 | -10 | 216.25  | 6.69  |
| -2 | 3 | -10 | 214.73  | 6.07  |
| -2 | 3 | -10 | 214.82  | 6.27  |
| -2 | 3 | -10 | 209.38  | 5.46  |
| -2 | 3 | -10 | 185.22  | 6.63  |
| -2 | 3 | -10 | 212.35  | 5.85  |
| -2 | 3 | -10 | 202.56  | 7.28  |
| -2 | 3 | -10 | 217.11  | 5.42  |
| -2 | 3 | -10 | 202.66  | 7.77  |
| -2 | 3 | -9  | 2.24    | 1.11  |
| -2 | 3 | -9  | 5.90    | 1.49  |
| -2 | 3 | -9  | 4.50    | 1.26  |
| -2 | 3 | -9  | 4.68    | 1.25  |
| -2 | 3 | -9  | 3.46    | 2.23  |
| -2 | 3 | -9  | 2.88    | 1.53  |
| -2 | 3 | -9  | 5.08    | 1.45  |
| -2 | 3 | -9  | 2.51    | 0.98  |
| -2 | 3 | -9  | 3.29    | 0.96  |
| -2 | 3 | -9  | 2.62    | 2.31  |
| -2 | 3 | -9  | 4.42    | 1.23  |
| -2 | 3 | -8  | 1000.22 | 13.48 |
| -2 | 3 | -8  | 1061.82 | 14.25 |
| -2 | 3 | -8  | 941.36  | 15.71 |
| -2 | 3 | -8  | 1004.23 | 14.13 |
| -2 | 3 | -8  | 1034.66 | 13.88 |
| -2 | 3 | -8  | 996.30  | 12.75 |
| -2 | 3 | -8  | 1015.06 | 12.99 |
| -2 | 3 | -8  | 993.24  | 12.34 |
| -2 | 3 | -8  | 980.82  | 13.46 |
| -2 | 3 | -8  | 1015.68 | 12.78 |
| -2 | 3 | -7  | 24.27   | 1.70  |
| -2 | 3 | -7  | 16.07   | 1.36  |
| -2 | 3 | -7  | 17.91   | 1.82  |
| -2 | 3 | -7  | 24.55   | 1.77  |
| -2 | 3 | -7  | 22.45   | 1.85  |
| -2 | 3 | -7  | 23.49   | 1.81  |
| -2 | 3 | -7  | 24.74   | 2.23  |

## CIF 31

|    |   |    |         |       |
|----|---|----|---------|-------|
| -2 | 3 | -7 | 20.47   | 1.49  |
| -2 | 3 | -7 | 16.15   | 1.55  |
| -2 | 3 | -7 | 17.20   | 1.32  |
| -2 | 3 | -7 | 15.32   | 1.46  |
| -2 | 3 | -7 | 16.10   | 1.35  |
| -2 | 3 | -6 | 1296.06 | 17.15 |
| -2 | 3 | -6 | 1377.27 | 15.46 |
| -2 | 3 | -6 | 1352.05 | 16.30 |
| -2 | 3 | -6 | 1329.40 | 16.16 |
| -2 | 3 | -6 | 1255.09 | 14.17 |
| -2 | 3 | -6 | 1244.39 | 16.36 |
| -2 | 3 | -5 | 216.05  | 4.87  |
| -2 | 3 | -5 | 229.29  | 4.12  |
| -2 | 3 | -4 | 330.33  | 5.91  |
| -2 | 3 | -4 | 320.66  | 4.81  |
| -2 | 3 | -4 | 332.01  | 4.81  |
| -2 | 3 | -4 | 336.50  | 5.18  |
| -2 | 3 | -3 | 902.85  | 10.80 |
| -2 | 3 | -3 | 886.22  | 9.49  |
| -2 | 3 | -3 | 902.35  | 10.85 |
| -2 | 3 | -3 | 870.75  | 9.55  |
| -2 | 3 | -3 | 849.33  | 9.29  |
| -2 | 3 | -3 | 887.98  | 9.86  |
| -2 | 3 | -3 | 919.09  | 10.09 |
| -2 | 3 | -2 | 1288.55 | 12.31 |
| -2 | 3 | -2 | 1370.56 | 12.99 |
| -2 | 3 | -2 | 1342.27 | 11.64 |
| -2 | 3 | -2 | 1364.85 | 13.33 |
| -2 | 3 | -2 | 1359.81 | 13.47 |
| -2 | 3 | -2 | 1357.70 | 13.85 |
| -2 | 3 | -2 | 1310.03 | 12.48 |
| -2 | 3 | -2 | 1419.27 | 13.90 |
| -2 | 3 | -2 | 1383.14 | 13.02 |
| -2 | 3 | -1 | 98.35   | 2.52  |
| -2 | 3 | -1 | 96.24   | 1.89  |
| -2 | 3 | -1 | 83.84   | 2.31  |
| -2 | 3 | -1 | 103.80  | 2.11  |
| -2 | 3 | -1 | 98.07   | 1.20  |
| -2 | 3 | -1 | 105.25  | 1.97  |
| -2 | 3 | -1 | 85.04   | 2.33  |
| -2 | 3 | -1 | 95.28   | 1.58  |

## CIF 31

|    |   |    |         |       |
|----|---|----|---------|-------|
| -2 | 3 | -1 | 86.05   | 2.18  |
| -2 | 3 | -1 | 90.41   | 2.31  |
| -2 | 3 | -1 | 97.06   | 2.09  |
| -2 | 3 | -1 | 89.94   | 2.07  |
| -2 | 3 | 0  | 871.92  | 8.35  |
| -2 | 3 | 0  | 886.77  | 7.85  |
| -2 | 3 | 0  | 926.62  | 9.60  |
| -2 | 3 | 0  | 840.06  | 8.64  |
| -2 | 3 | 0  | 770.93  | 8.44  |
| -2 | 3 | 0  | 885.30  | 9.55  |
| -2 | 3 | 0  | 804.07  | 7.31  |
| -2 | 3 | 0  | 847.40  | 9.15  |
| -2 | 3 | 1  | 2.71    | 0.40  |
| -2 | 3 | 1  | 2.84    | 0.45  |
| -2 | 3 | 1  | 1.70    | 0.55  |
| -2 | 3 | 1  | 3.52    | 0.67  |
| -2 | 3 | 1  | 2.28    | 0.45  |
| -2 | 3 | 2  | 1148.29 | 10.84 |
| -2 | 3 | 2  | 1146.41 | 12.34 |
| -2 | 3 | 2  | 1217.98 | 11.30 |
| -2 | 3 | 2  | 1185.66 | 11.06 |
| -2 | 3 | 2  | 1125.63 | 11.36 |
| -2 | 3 | 2  | 1205.47 | 12.50 |
| -2 | 3 | 2  | 1113.83 | 11.45 |
| -2 | 3 | 3  | 183.79  | 3.60  |
| -2 | 3 | 3  | 164.22  | 2.52  |
| -2 | 3 | 3  | 186.30  | 3.13  |
| -2 | 3 | 3  | 176.18  | 3.36  |
| -2 | 3 | 3  | 196.12  | 3.90  |
| -2 | 3 | 3  | 158.67  | 2.64  |
| -2 | 3 | 3  | 179.88  | 3.93  |
| -2 | 3 | 4  | 80.07   | 1.84  |
| -2 | 3 | 4  | 78.25   | 1.68  |
| -2 | 3 | 4  | 84.28   | 2.64  |
| -2 | 3 | 4  | 88.27   | 2.22  |
| -2 | 3 | 4  | 85.56   | 2.76  |
| -2 | 3 | 4  | 78.71   | 2.12  |
| -2 | 3 | 4  | 88.13   | 2.45  |
| -2 | 3 | 5  | 2436.44 | 24.54 |
| -2 | 3 | 5  | 2461.10 | 22.07 |
| -2 | 3 | 5  | 2763.10 | 22.79 |

## CIF 31

|    |   |     |         |       |
|----|---|-----|---------|-------|
| -2 | 3 | 5   | 2627.33 | 23.65 |
| -2 | 3 | 5   | 2529.45 | 23.68 |
| -2 | 3 | 5   | 2222.29 | 22.42 |
| -2 | 3 | 5   | 2444.88 | 24.51 |
| -2 | 3 | 5   | 2611.62 | 25.40 |
| -2 | 3 | 6   | 197.42  | 4.50  |
| -2 | 3 | 6   | 186.15  | 3.42  |
| -2 | 3 | 6   | 189.83  | 4.45  |
| -2 | 3 | 6   | 182.64  | 4.68  |
| -2 | 3 | 7   | 76.87   | 2.67  |
| -2 | 3 | 7   | 71.07   | 2.71  |
| -2 | 3 | 7   | 71.72   | 3.07  |
| -2 | 3 | 8   | 30.99   | 2.34  |
| -2 | 3 | 8   | 31.47   | 1.97  |
| -2 | 3 | 8   | 32.59   | 2.18  |
| -2 | 3 | 9   | 246.33  | 6.59  |
| -2 | 3 | 9   | 251.01  | 5.65  |
| -2 | 3 | 9   | 261.48  | 7.44  |
| -2 | 3 | 9   | 275.78  | 6.18  |
| -2 | 3 | 9   | 232.13  | 5.83  |
| -2 | 3 | 10  | 199.69  | 6.04  |
| -2 | 3 | 10  | 198.36  | 5.79  |
| -2 | 3 | 10  | 210.62  | 5.21  |
| -2 | 3 | 10  | 204.48  | 6.68  |
| -2 | 3 | 11  | 40.89   | 2.37  |
| -2 | 3 | 11  | 39.90   | 2.62  |
| -2 | 3 | 11  | 39.76   | 2.96  |
| -2 | 3 | 11  | 42.79   | 2.46  |
| -2 | 3 | 12  | 164.31  | 5.03  |
| -2 | 3 | 12  | 157.39  | 4.60  |
| -2 | 3 | 12  | 175.79  | 4.59  |
| -2 | 3 | 12  | 152.52  | 5.21  |
| -2 | 3 | 12  | 171.30  | 4.67  |
| -2 | 3 | 13  | 240.67  | 5.10  |
| -2 | 3 | 14  | 5.21    | 0.79  |
| -2 | 4 | -14 | 21.79   | 1.29  |
| -2 | 4 | -14 | 21.69   | 1.12  |
| -2 | 4 | -13 | 4.95    | 1.09  |
| -2 | 4 | -13 | 6.99    | 0.96  |
| -2 | 4 | -13 | 6.12    | 2.20  |
| -2 | 4 | -13 | 6.70    | 1.00  |

## CIF 31

|    |   |     |        |      |
|----|---|-----|--------|------|
| -2 | 4 | -12 | 3.94   | 1.19 |
| -2 | 4 | -12 | 6.29   | 3.00 |
| -2 | 4 | -12 | 7.13   | 1.23 |
| -2 | 4 | -12 | 6.36   | 1.23 |
| -2 | 4 | -12 | 5.67   | 1.09 |
| -2 | 4 | -11 | 71.86  | 3.71 |
| -2 | 4 | -11 | 68.34  | 3.84 |
| -2 | 4 | -11 | 68.28  | 3.23 |
| -2 | 4 | -11 | 70.05  | 3.14 |
| -2 | 4 | -11 | 67.83  | 3.07 |
| -2 | 4 | -11 | 61.16  | 4.24 |
| -2 | 4 | -10 | 109.32 | 4.62 |
| -2 | 4 | -10 | 95.25  | 4.97 |
| -2 | 4 | -10 | 98.73  | 4.30 |
| -2 | 4 | -10 | 108.64 | 4.08 |
| -2 | 4 | -10 | 98.62  | 3.75 |
| -2 | 4 | -10 | 106.94 | 6.72 |
| -2 | 4 | -10 | 107.72 | 3.82 |
| -2 | 4 | -10 | 116.97 | 6.62 |
| -2 | 4 | -9  | 41.03  | 2.87 |
| -2 | 4 | -9  | 45.47  | 2.81 |
| -2 | 4 | -9  | 40.26  | 2.36 |
| -2 | 4 | -9  | 44.00  | 3.37 |
| -2 | 4 | -9  | 35.20  | 2.33 |
| -2 | 4 | -9  | 34.23  | 3.50 |
| -2 | 4 | -8  | 416.55 | 7.67 |
| -2 | 4 | -8  | 469.40 | 7.90 |
| -2 | 4 | -8  | 362.11 | 9.17 |
| -2 | 4 | -8  | 430.48 | 9.02 |
| -2 | 4 | -8  | 392.54 | 8.42 |
| -2 | 4 | -8  | 413.41 | 8.67 |
| -2 | 4 | -8  | 400.84 | 8.21 |
| -2 | 4 | -8  | 361.44 | 7.20 |
| -2 | 4 | -8  | 407.84 | 7.65 |
| -2 | 4 | -7  | 40.06  | 2.13 |
| -2 | 4 | -7  | 58.14  | 3.39 |
| -2 | 4 | -7  | 53.26  | 2.91 |
| -2 | 4 | -7  | 52.37  | 2.63 |
| -2 | 4 | -7  | 53.44  | 2.88 |
| -2 | 4 | -7  | 49.77  | 2.81 |
| -2 | 4 | -7  | 46.66  | 2.27 |

## CIF 31

|    |   |    |         |       |
|----|---|----|---------|-------|
| -2 | 4 | -7 | 46.73   | 2.91  |
| -2 | 4 | -7 | 48.24   | 2.35  |
| -2 | 4 | -7 | 47.20   | 2.66  |
| -2 | 4 | -7 | 45.79   | 2.39  |
| -2 | 4 | -7 | 41.50   | 2.14  |
| -2 | 4 | -6 | 1819.77 | 18.99 |
| -2 | 4 | -6 | 1934.05 | 22.59 |
| -2 | 4 | -6 | 1909.74 | 21.04 |
| -2 | 4 | -6 | 1867.56 | 19.98 |
| -2 | 4 | -6 | 1804.56 | 20.23 |
| -2 | 4 | -6 | 1934.36 | 21.49 |
| -2 | 4 | -6 | 1778.04 | 21.24 |
| -2 | 4 | -6 | 1782.51 | 20.58 |
| -2 | 4 | -6 | 1916.03 | 21.41 |
| -2 | 4 | -6 | 1622.54 | 18.43 |
| -2 | 4 | -6 | 1743.68 | 18.51 |
| -2 | 4 | -6 | 1749.83 | 19.08 |
| -2 | 4 | -6 | 1693.51 | 18.44 |
| -2 | 4 | -5 | 251.94  | 5.58  |
| -2 | 4 | -5 | 243.85  | 5.78  |
| -2 | 4 | -5 | 250.50  | 5.43  |
| -2 | 4 | -5 | 236.29  | 5.54  |
| -2 | 4 | -5 | 223.69  | 4.39  |
| -2 | 4 | -5 | 232.44  | 4.44  |
| -2 | 4 | -4 | 113.63  | 2.88  |
| -2 | 4 | -4 | 120.33  | 2.59  |
| -2 | 4 | -4 | 94.01   | 2.75  |
| -2 | 4 | -4 | 114.22  | 2.79  |
| -2 | 4 | -4 | 112.46  | 3.51  |
| -2 | 4 | -4 | 103.92  | 3.35  |
| -2 | 4 | -4 | 100.11  | 2.78  |
| -2 | 4 | -3 | 3551.82 | 30.41 |
| -2 | 4 | -3 | 3336.75 | 29.70 |
| -2 | 4 | -3 | 3398.60 | 30.52 |
| -2 | 4 | -3 | 3480.68 | 32.39 |
| -2 | 4 | -3 | 3320.24 | 28.77 |
| -2 | 4 | -3 | 3485.49 | 30.62 |
| -2 | 4 | -3 | 3148.92 | 31.48 |
| -2 | 4 | -3 | 3638.52 | 31.43 |
| -2 | 4 | -2 | 141.32  | 2.81  |
| -2 | 4 | -2 | 136.11  | 3.27  |



## CIF 31

|    |   |    |         |       |
|----|---|----|---------|-------|
| -2 | 4 | -2 | 126.61  | 3.30  |
| -2 | 4 | -2 | 122.39  | 3.35  |
| -2 | 4 | -2 | 138.83  | 2.43  |
| -2 | 4 | -2 | 132.79  | 1.96  |
| -2 | 4 | -2 | 114.41  | 2.85  |
| -2 | 4 | -2 | 130.76  | 2.64  |
| -2 | 4 | -2 | 122.25  | 3.08  |
| -2 | 4 | -2 | 122.68  | 3.29  |
| -2 | 4 | -2 | 126.82  | 2.64  |
| -2 | 4 | -1 | 8724.23 | 73.91 |
| -2 | 4 | -1 | 8878.68 | 73.66 |
| -2 | 4 | -1 | 8800.78 | 73.02 |
| -2 | 4 | 0  | 2809.27 | 23.74 |
| -2 | 4 | 0  | 2865.99 | 24.96 |
| -2 | 4 | 0  | 2894.95 | 25.41 |
| -2 | 4 | 0  | 2508.65 | 22.92 |
| -2 | 4 | 0  | 2601.28 | 23.49 |
| -2 | 4 | 0  | 2657.28 | 23.47 |
| -2 | 4 | 0  | 2939.18 | 24.92 |
| -2 | 4 | 0  | 2439.67 | 22.36 |
| -2 | 4 | 0  | 2534.23 | 24.49 |
| -2 | 4 | 0  | 2703.11 | 25.21 |
| -2 | 4 | 1  | 21.78   | 1.08  |
| -2 | 4 | 1  | 15.08   | 0.86  |
| -2 | 4 | 1  | 17.39   | 1.35  |
| -2 | 4 | 1  | 17.60   | 1.30  |
| -2 | 4 | 1  | 18.55   | 1.32  |
| -2 | 4 | 1  | 16.01   | 0.73  |
| -2 | 4 | 1  | 17.70   | 1.25  |
| -2 | 4 | 1  | 19.92   | 0.90  |
| -2 | 4 | 2  | 612.26  | 7.21  |
| -2 | 4 | 2  | 593.41  | 8.48  |
| -2 | 4 | 2  | 550.67  | 6.83  |
| -2 | 4 | 2  | 597.92  | 8.44  |
| -2 | 4 | 2  | 677.40  | 8.64  |
| -2 | 4 | 2  | 649.79  | 8.68  |
| -2 | 4 | 3  | 432.13  | 6.07  |
| -2 | 4 | 3  | 451.10  | 5.87  |
| -2 | 4 | 3  | 485.78  | 7.58  |
| -2 | 4 | 3  | 468.19  | 7.14  |
| -2 | 4 | 3  | 431.51  | 6.72  |

## CIF 31

|    |   |    |         |       |
|----|---|----|---------|-------|
| -2 | 4 | 4  | 279.66  | 5.39  |
| -2 | 4 | 4  | 285.45  | 4.59  |
| -2 | 4 | 4  | 289.65  | 5.88  |
| -2 | 4 | 4  | 274.98  | 4.98  |
| -2 | 4 | 4  | 283.58  | 4.93  |
| -2 | 4 | 4  | 275.93  | 5.88  |
| -2 | 4 | 5  | 35.50   | 1.74  |
| -2 | 4 | 5  | 31.37   | 2.03  |
| -2 | 4 | 5  | 33.62   | 1.61  |
| -2 | 4 | 5  | 34.96   | 1.87  |
| -2 | 4 | 5  | 35.67   | 1.83  |
| -2 | 4 | 5  | 34.24   | 2.20  |
| -2 | 4 | 6  | 2427.55 | 25.57 |
| -2 | 4 | 6  | 2377.60 | 25.42 |
| -2 | 4 | 6  | 2300.03 | 25.40 |
| -2 | 4 | 6  | 2402.55 | 24.15 |
| -2 | 4 | 6  | 2400.71 | 23.48 |
| -2 | 4 | 6  | 2248.07 | 25.92 |
| -2 | 4 | 7  | 2.64    | 0.89  |
| -2 | 4 | 7  | 1.34    | 0.59  |
| -2 | 4 | 7  | 2.99    | 0.90  |
| -2 | 4 | 7  | 2.44    | 0.81  |
| -2 | 4 | 7  | 2.38    | 1.02  |
| -2 | 4 | 8  | 706.28  | 10.59 |
| -2 | 4 | 8  | 634.34  | 12.00 |
| -2 | 4 | 8  | 741.98  | 10.09 |
| -2 | 4 | 8  | 749.42  | 11.04 |
| -2 | 4 | 8  | 677.91  | 11.68 |
| -2 | 4 | 9  | 21.18   | 1.76  |
| -2 | 4 | 9  | 15.83   | 1.98  |
| -2 | 4 | 9  | 20.71   | 1.77  |
| -2 | 4 | 9  | 13.87   | 1.67  |
| -2 | 4 | 10 | 560.59  | 10.94 |
| -2 | 4 | 10 | 525.88  | 10.44 |
| -2 | 4 | 10 | 540.91  | 11.44 |
| -2 | 4 | 11 | 3.79    | 0.92  |
| -2 | 4 | 11 | 4.04    | 1.19  |
| -2 | 4 | 11 | 1.75    | 0.95  |
| -2 | 4 | 11 | 3.20    | 1.26  |
| -2 | 4 | 11 | 3.75    | 0.91  |
| -2 | 4 | 12 | 10.19   | 1.34  |

## CIF 31

|    |   |     |        |      |
|----|---|-----|--------|------|
| -2 | 4 | 12  | 11.50  | 1.49 |
| -2 | 4 | 12  | 10.43  | 1.49 |
| -2 | 4 | 13  | 1.85   | 0.65 |
| -2 | 5 | -14 | 0.46   | 0.52 |
| -2 | 5 | -14 | 0.56   | 0.49 |
| -2 | 5 | -13 | 3.06   | 0.69 |
| -2 | 5 | -13 | 2.88   | 1.45 |
| -2 | 5 | -13 | 3.41   | 1.03 |
| -2 | 5 | -13 | 2.68   | 0.82 |
| -2 | 5 | -12 | 9.05   | 3.31 |
| -2 | 5 | -12 | 7.31   | 1.26 |
| -2 | 5 | -12 | 9.12   | 1.48 |
| -2 | 5 | -12 | 7.05   | 1.19 |
| -2 | 5 | -12 | 7.96   | 1.06 |
| -2 | 5 | -12 | 9.54   | 1.32 |
| -2 | 5 | -11 | 62.41  | 3.54 |
| -2 | 5 | -11 | 70.23  | 4.41 |
| -2 | 5 | -11 | 74.38  | 3.21 |
| -2 | 5 | -11 | 68.15  | 3.14 |
| -2 | 5 | -11 | 68.37  | 5.07 |
| -2 | 5 | -10 | 1.93   | 1.20 |
| -2 | 5 | -10 | 0.73   | 1.20 |
| -2 | 5 | -10 | 1.55   | 1.52 |
| -2 | 5 | -10 | 0.89   | 3.33 |
| -2 | 5 | -10 | 0.50   | 0.94 |
| -2 | 5 | -10 | 4.01   | 1.18 |
| -2 | 5 | -9  | 27.82  | 3.11 |
| -2 | 5 | -9  | 26.99  | 2.52 |
| -2 | 5 | -9  | 32.41  | 2.52 |
| -2 | 5 | -9  | 26.56  | 2.34 |
| -2 | 5 | -9  | 26.94  | 2.42 |
| -2 | 5 | -9  | 29.76  | 2.04 |
| -2 | 5 | -9  | 28.28  | 2.97 |
| -2 | 5 | -9  | 28.68  | 4.37 |
| -2 | 5 | -9  | 31.44  | 2.29 |
| -2 | 5 | -9  | 33.97  | 2.26 |
| -2 | 5 | -9  | 32.69  | 3.98 |
| -2 | 5 | -8  | 407.88 | 7.50 |
| -2 | 5 | -8  | 390.61 | 7.67 |
| -2 | 5 | -8  | 423.54 | 7.87 |
| -2 | 5 | -8  | 404.12 | 8.58 |

## CIF 31

|    |   |    |         |       |
|----|---|----|---------|-------|
| -2 | 5 | -8 | 414.56  | 9.14  |
| -2 | 5 | -8 | 391.10  | 8.90  |
| -2 | 5 | -8 | 370.63  | 9.10  |
| -2 | 5 | -8 | 402.85  | 9.93  |
| -2 | 5 | -8 | 401.20  | 8.97  |
| -2 | 5 | -8 | 355.72  | 8.33  |
| -2 | 5 | -8 | 424.90  | 8.26  |
| -2 | 5 | -8 | 381.77  | 7.27  |
| -2 | 5 | -7 | 1019.40 | 13.22 |
| -2 | 5 | -7 | 1115.97 | 14.09 |
| -2 | 5 | -7 | 1203.79 | 15.69 |
| -2 | 5 | -7 | 1219.23 | 16.79 |
| -2 | 5 | -7 | 1169.18 | 15.45 |
| -2 | 5 | -7 | 1192.25 | 16.64 |
| -2 | 5 | -7 | 1167.25 | 16.77 |
| -2 | 5 | -7 | 1086.92 | 14.08 |
| -2 | 5 | -7 | 1124.81 | 16.03 |
| -2 | 5 | -7 | 1098.96 | 15.79 |
| -2 | 5 | -7 | 1024.78 | 13.94 |
| -2 | 5 | -7 | 1124.22 | 13.79 |
| -2 | 5 | -6 | 494.74  | 9.25  |
| -2 | 5 | -6 | 580.72  | 9.47  |
| -2 | 5 | -6 | 536.28  | 9.32  |
| -2 | 5 | -6 | 539.44  | 8.37  |
| -2 | 5 | -6 | 536.53  | 10.47 |
| -2 | 5 | -6 | 540.28  | 9.76  |
| -2 | 5 | -6 | 612.89  | 8.80  |
| -2 | 5 | -6 | 507.97  | 9.75  |
| -2 | 5 | -6 | 599.57  | 8.68  |
| -2 | 5 | -6 | 443.16  | 9.40  |
| -2 | 5 | -6 | 580.25  | 8.21  |
| -2 | 5 | -5 | 1819.03 | 19.70 |
| -2 | 5 | -5 | 2001.50 | 22.88 |
| -2 | 5 | -5 | 1893.19 | 21.01 |
| -2 | 5 | -5 | 2024.55 | 21.80 |
| -2 | 5 | -5 | 1911.30 | 21.40 |
| -2 | 5 | -5 | 1986.32 | 22.39 |
| -2 | 5 | -5 | 1919.48 | 22.02 |
| -2 | 5 | -5 | 2006.75 | 20.12 |
| -2 | 5 | -5 | 1737.09 | 20.04 |
| -2 | 5 | -5 | 1951.76 | 22.40 |

## CIF 31

|    |   |    |         |       |
|----|---|----|---------|-------|
| -2 | 5 | -5 | 2014.09 | 20.08 |
| -2 | 5 | -4 | 2787.62 | 28.62 |
| -2 | 5 | -4 | 2783.15 | 27.90 |
| -2 | 5 | -4 | 2772.81 | 26.24 |
| -2 | 5 | -4 | 2784.27 | 25.36 |
| -2 | 5 | -4 | 2729.28 | 28.08 |
| -2 | 5 | -4 | 2587.05 | 23.94 |
| -2 | 5 | -4 | 2556.56 | 27.02 |
| -2 | 5 | -4 | 2687.18 | 25.46 |
| -2 | 5 | -4 | 2615.92 | 27.85 |
| -2 | 5 | -4 | 2703.50 | 26.53 |
| -2 | 5 | -3 | 803.85  | 10.44 |
| -2 | 5 | -3 | 731.10  | 10.64 |
| -2 | 5 | -3 | 753.44  | 8.74  |
| -2 | 5 | -3 | 746.83  | 7.86  |
| -2 | 5 | -3 | 751.55  | 9.40  |
| -2 | 5 | -3 | 781.76  | 10.14 |
| -2 | 5 | -3 | 767.99  | 9.55  |
| -2 | 5 | -3 | 729.81  | 10.62 |
| -2 | 5 | -2 | 169.32  | 4.46  |
| -2 | 5 | -2 | 198.18  | 3.84  |
| -2 | 5 | -2 | 172.79  | 4.31  |
| -2 | 5 | -2 | 181.63  | 4.25  |
| -2 | 5 | -2 | 167.04  | 4.25  |
| -2 | 5 | -2 | 179.20  | 2.80  |
| -2 | 5 | -2 | 174.37  | 3.97  |
| -2 | 5 | -2 | 160.81  | 3.32  |
| -2 | 5 | -2 | 182.80  | 3.27  |
| -2 | 5 | -2 | 181.80  | 4.25  |
| -2 | 5 | -2 | 177.66  | 3.59  |
| -2 | 5 | -1 | 385.86  | 6.45  |
| -2 | 5 | -1 | 431.15  | 6.90  |
| -2 | 5 | -1 | 396.73  | 7.20  |
| -2 | 5 | -1 | 439.27  | 6.04  |
| -2 | 5 | -1 | 407.91  | 5.60  |
| -2 | 5 | -1 | 401.90  | 6.62  |
| -2 | 5 | -1 | 390.64  | 5.89  |
| -2 | 5 | -1 | 398.97  | 6.76  |
| -2 | 5 | -1 | 393.24  | 6.15  |
| -2 | 5 | -1 | 392.15  | 4.80  |
| -2 | 5 | -1 | 415.77  | 6.68  |

## CIF 31

|    |   |    |         |       |
|----|---|----|---------|-------|
| -2 | 5 | -1 | 359.81  | 5.17  |
| -2 | 5 | 0  | 7408.98 | 63.54 |
| -2 | 5 | 0  | 7337.66 | 63.38 |
| -2 | 5 | 0  | 7442.10 | 63.56 |
| -2 | 5 | 0  | 7249.42 | 61.10 |
| -2 | 5 | 0  | 7151.12 | 60.21 |
| -2 | 5 | 0  | 7385.00 | 63.80 |
| -2 | 5 | 0  | 7720.88 | 63.09 |
| -2 | 5 | 0  | 7524.96 | 61.30 |
| -2 | 5 | 0  | 7166.00 | 62.56 |
| -2 | 5 | 0  | 6857.21 | 61.75 |
| -2 | 5 | 0  | 7504.19 | 63.12 |
| -2 | 5 | 1  | 122.39  | 3.12  |
| -2 | 5 | 1  | 119.94  | 3.38  |
| -2 | 5 | 1  | 125.93  | 3.74  |
| -2 | 5 | 1  | 129.68  | 2.99  |
| -2 | 5 | 1  | 120.70  | 2.40  |
| -2 | 5 | 1  | 121.91  | 3.82  |
| -2 | 5 | 1  | 124.50  | 2.70  |
| -2 | 5 | 1  | 128.33  | 2.69  |
| -2 | 5 | 1  | 128.65  | 3.64  |
| -2 | 5 | 1  | 129.73  | 3.74  |
| -2 | 5 | 1  | 123.55  | 3.00  |
| -2 | 5 | 1  | 123.85  | 2.62  |
| -2 | 5 | 2  | 1804.10 | 16.76 |
| -2 | 5 | 2  | 1727.09 | 18.93 |
| -2 | 5 | 2  | 1647.36 | 17.88 |
| -2 | 5 | 2  | 1608.70 | 16.13 |
| -2 | 5 | 2  | 1686.15 | 17.07 |
| -2 | 5 | 2  | 1718.98 | 17.29 |
| -2 | 5 | 2  | 1664.74 | 19.09 |
| -2 | 5 | 2  | 1695.60 | 16.20 |
| -2 | 5 | 2  | 1579.45 | 18.62 |
| -2 | 5 | 3  | 1029.55 | 13.35 |
| -2 | 5 | 3  | 1107.71 | 12.24 |
| -2 | 5 | 3  | 1004.93 | 12.42 |
| -2 | 5 | 3  | 1111.48 | 11.40 |
| -2 | 5 | 3  | 1029.33 | 13.97 |
| -2 | 5 | 3  | 1024.54 | 13.52 |
| -2 | 5 | 3  | 1039.51 | 12.20 |
| -2 | 5 | 4  | 22.54   | 1.48  |

## CIF 31

|    |   |    |        |       |
|----|---|----|--------|-------|
| -2 | 5 | 4  | 24.87  | 1.29  |
| -2 | 5 | 4  | 26.08  | 1.73  |
| -2 | 5 | 4  | 24.89  | 1.64  |
| -2 | 5 | 4  | 23.39  | 1.98  |
| -2 | 5 | 4  | 21.71  | 1.72  |
| -2 | 5 | 4  | 21.51  | 1.54  |
| -2 | 5 | 5  | 1.51   | 0.90  |
| -2 | 5 | 5  | 2.65   | 0.76  |
| -2 | 5 | 5  | 2.41   | 0.57  |
| -2 | 5 | 5  | 3.48   | 0.94  |
| -2 | 5 | 5  | 1.89   | 0.73  |
| -2 | 5 | 5  | 2.36   | 1.15  |
| -2 | 5 | 6  | 117.02 | 4.37  |
| -2 | 5 | 6  | 114.81 | 4.27  |
| -2 | 5 | 6  | 131.27 | 4.51  |
| -2 | 5 | 6  | 127.91 | 3.81  |
| -2 | 5 | 6  | 124.57 | 3.19  |
| -2 | 5 | 6  | 119.92 | 3.90  |
| -2 | 5 | 6  | 143.46 | 4.07  |
| -2 | 5 | 6  | 112.99 | 4.47  |
| -2 | 5 | 7  | 374.64 | 7.83  |
| -2 | 5 | 7  | 373.54 | 7.19  |
| -2 | 5 | 7  | 366.34 | 7.24  |
| -2 | 5 | 7  | 348.91 | 8.27  |
| -2 | 5 | 7  | 347.88 | 7.83  |
| -2 | 5 | 8  | 573.35 | 10.25 |
| -2 | 5 | 8  | 581.80 | 11.76 |
| -2 | 5 | 8  | 570.42 | 10.24 |
| -2 | 5 | 8  | 598.86 | 10.05 |
| -2 | 5 | 8  | 565.82 | 11.07 |
| -2 | 5 | 9  | 167.11 | 5.88  |
| -2 | 5 | 9  | 158.20 | 6.02  |
| -2 | 5 | 9  | 177.68 | 5.06  |
| -2 | 5 | 9  | 169.88 | 5.12  |
| -2 | 5 | 9  | 170.61 | 5.52  |
| -2 | 5 | 10 | 68.19  | 2.99  |
| -2 | 5 | 10 | 59.79  | 3.38  |
| -2 | 5 | 10 | 60.77  | 3.34  |
| -2 | 5 | 10 | 69.12  | 3.04  |
| -2 | 5 | 11 | 19.68  | 1.85  |
| -2 | 5 | 11 | 17.92  | 1.64  |

## CIF 31

|    |   |     |        |      |
|----|---|-----|--------|------|
| -2 | 5 | 11  | 20.53  | 2.06 |
| -2 | 5 | 12  | 270.03 | 5.48 |
| -2 | 5 | 12  | 290.95 | 5.98 |
| -2 | 6 | -14 | 6.02   | 0.71 |
| -2 | 6 | -13 | 18.46  | 1.43 |
| -2 | 6 | -13 | 17.44  | 1.42 |
| -2 | 6 | -13 | 17.78  | 1.39 |
| -2 | 6 | -12 | 92.26  | 3.35 |
| -2 | 6 | -12 | 97.35  | 3.21 |
| -2 | 6 | -12 | 100.82 | 3.50 |
| -2 | 6 | -11 | 0.76   | 1.29 |
| -2 | 6 | -11 | 1.50   | 1.04 |
| -2 | 6 | -11 | 1.17   | 3.83 |
| -2 | 6 | -11 | 0.42   | 0.91 |
| -2 | 6 | -11 | 0.21   | 0.87 |
| -2 | 6 | -11 | 0.61   | 0.86 |
| -2 | 6 | -11 | 0.46   | 1.44 |
| -2 | 6 | -10 | 79.07  | 4.20 |
| -2 | 6 | -10 | 77.37  | 4.01 |
| -2 | 6 | -10 | 75.07  | 3.82 |
| -2 | 6 | -10 | 72.35  | 3.86 |
| -2 | 6 | -10 | 93.20  | 3.57 |
| -2 | 6 | -10 | 92.08  | 3.56 |
| -2 | 6 | -10 | 82.02  | 4.90 |
| -2 | 6 | -10 | 95.89  | 5.07 |
| -2 | 6 | -9  | 1.84   | 1.24 |
| -2 | 6 | -9  | 1.58   | 1.60 |
| -2 | 6 | -9  | 1.27   | 1.12 |
| -2 | 6 | -9  | 1.45   | 1.12 |
| -2 | 6 | -9  | 2.10   | 1.03 |
| -2 | 6 | -9  | 1.67   | 3.03 |
| -2 | 6 | -9  | 0.97   | 1.00 |
| -2 | 6 | -9  | 1.58   | 1.22 |
| -2 | 6 | -9  | 2.51   | 4.73 |
| -2 | 6 | -9  | 4.77   | 1.17 |
| -2 | 6 | -8  | 1.44   | 1.08 |
| -2 | 6 | -8  | 3.33   | 1.25 |
| -2 | 6 | -8  | 2.07   | 1.14 |
| -2 | 6 | -8  | 2.51   | 1.32 |
| -2 | 6 | -8  | 0.23   | 2.26 |
| -2 | 6 | -8  | 2.71   | 1.08 |



## CIF 31

|    |   |    |        |      |
|----|---|----|--------|------|
| -2 | 6 | -8 | 1.26   | 1.17 |
| -2 | 6 | -8 | 2.02   | 1.45 |
| -2 | 6 | -8 | 2.79   | 1.31 |
| -2 | 6 | -8 | 0.69   | 3.37 |
| -2 | 6 | -8 | 1.69   | 0.98 |
| -2 | 6 | -7 | 33.79  | 2.52 |
| -2 | 6 | -7 | 30.95  | 2.77 |
| -2 | 6 | -7 | 23.47  | 2.08 |
| -2 | 6 | -7 | 23.88  | 2.11 |
| -2 | 6 | -7 | 21.24  | 1.87 |
| -2 | 6 | -7 | 15.10  | 2.35 |
| -2 | 6 | -7 | 18.25  | 1.52 |
| -2 | 6 | -7 | 24.55  | 2.30 |
| -2 | 6 | -6 | 135.22 | 4.12 |
| -2 | 6 | -6 | 166.33 | 5.18 |
| -2 | 6 | -6 | 136.94 | 4.12 |
| -2 | 6 | -6 | 168.57 | 5.59 |
| -2 | 6 | -6 | 184.94 | 5.42 |
| -2 | 6 | -6 | 177.80 | 5.73 |
| -2 | 6 | -6 | 169.05 | 5.43 |
| -2 | 6 | -6 | 161.46 | 5.71 |
| -2 | 6 | -6 | 169.02 | 4.58 |
| -2 | 6 | -6 | 140.82 | 3.74 |
| -2 | 6 | -5 | 200.77 | 5.90 |
| -2 | 6 | -5 | 204.18 | 4.68 |
| -2 | 6 | -5 | 187.98 | 5.62 |
| -2 | 6 | -5 | 209.90 | 4.97 |
| -2 | 6 | -5 | 185.78 | 5.27 |
| -2 | 6 | -5 | 182.55 | 5.34 |
| -2 | 6 | -5 | 230.96 | 4.61 |
| -2 | 6 | -5 | 180.87 | 5.72 |
| -2 | 6 | -5 | 189.20 | 5.21 |
| -2 | 6 | -5 | 211.22 | 4.83 |
| -2 | 6 | -5 | 199.67 | 4.40 |
| -2 | 6 | -5 | 192.65 | 4.76 |
| -2 | 6 | -5 | 212.43 | 4.30 |
| -2 | 6 | -4 | 400.21 | 6.39 |
| -2 | 6 | -4 | 387.84 | 6.56 |
| -2 | 6 | -4 | 461.01 | 8.36 |
| -2 | 6 | -4 | 396.71 | 8.20 |
| -2 | 6 | -4 | 402.04 | 7.06 |

## CIF 31

|    |   |    |         |       |
|----|---|----|---------|-------|
| -2 | 6 | -4 | 434.77  | 7.81  |
| -2 | 6 | -4 | 467.18  | 8.56  |
| -2 | 6 | -4 | 408.76  | 6.74  |
| -2 | 6 | -4 | 423.93  | 8.59  |
| -2 | 6 | -4 | 394.60  | 8.06  |
| -2 | 6 | -4 | 440.37  | 7.60  |
| -2 | 6 | -4 | 425.16  | 8.22  |
| -2 | 6 | -3 | 158.82  | 3.48  |
| -2 | 6 | -3 | 148.21  | 4.29  |
| -2 | 6 | -3 | 154.84  | 3.88  |
| -2 | 6 | -3 | 171.13  | 4.07  |
| -2 | 6 | -3 | 136.70  | 4.39  |
| -2 | 6 | -3 | 144.71  | 3.81  |
| -2 | 6 | -3 | 139.92  | 4.54  |
| -2 | 6 | -3 | 146.68  | 4.30  |
| -2 | 6 | -3 | 122.62  | 3.98  |
| -2 | 6 | -3 | 140.55  | 4.46  |
| -2 | 6 | -3 | 139.44  | 3.82  |
| -2 | 6 | -3 | 130.92  | 4.31  |
| -2 | 6 | -3 | 147.17  | 4.24  |
| -2 | 6 | -3 | 145.85  | 4.49  |
| -2 | 6 | -3 | 149.14  | 2.86  |
| -2 | 6 | -3 | 155.18  | 3.70  |
| -2 | 6 | -3 | 147.23  | 4.20  |
| -2 | 6 | -2 | 1830.07 | 20.13 |
| -2 | 6 | -2 | 1782.76 | 20.37 |
| -2 | 6 | -2 | 1885.97 | 20.94 |
| -2 | 6 | -2 | 1867.73 | 20.05 |
| -2 | 6 | -2 | 1860.51 | 19.36 |
| -2 | 6 | -2 | 1849.61 | 20.81 |
| -2 | 6 | -2 | 2033.77 | 21.46 |
| -2 | 6 | -2 | 1929.41 | 20.87 |
| -2 | 6 | -2 | 1804.99 | 17.39 |
| -2 | 6 | -2 | 1863.72 | 18.76 |
| -2 | 6 | -2 | 1655.79 | 21.18 |
| -2 | 6 | -2 | 1823.77 | 21.30 |
| -2 | 6 | -2 | 1864.33 | 18.49 |
| -2 | 6 | -2 | 1976.63 | 20.99 |
| -2 | 6 | -2 | 1890.00 | 19.59 |
| -2 | 6 | -2 | 1908.77 | 19.32 |
| -2 | 6 | -1 | 2402.07 | 24.41 |

## CIF 31

|    |   |    |         |       |
|----|---|----|---------|-------|
| -2 | 6 | -1 | 2388.73 | 24.97 |
| -2 | 6 | -1 | 2476.67 | 25.21 |
| -2 | 6 | -1 | 2333.08 | 25.12 |
| -2 | 6 | -1 | 2327.06 | 24.49 |
| -2 | 6 | -1 | 2457.12 | 23.42 |
| -2 | 6 | -1 | 2275.69 | 24.62 |
| -2 | 6 | -1 | 2405.02 | 24.82 |
| -2 | 6 | -1 | 2470.55 | 24.88 |
| -2 | 6 | -1 | 2211.91 | 22.38 |
| -2 | 6 | -1 | 2289.22 | 21.54 |
| -2 | 6 | -1 | 2412.95 | 23.43 |
| -2 | 6 | -1 | 2331.03 | 24.40 |
| -2 | 6 | -1 | 2334.53 | 23.82 |
| -2 | 6 | -1 | 2360.49 | 22.47 |
| -2 | 6 | 0  | 6041.02 | 55.07 |
| -2 | 6 | 0  | 5716.29 | 55.94 |
| -2 | 6 | 0  | 5655.51 | 51.99 |
| -2 | 6 | 0  | 6207.38 | 53.21 |
| -2 | 6 | 0  | 6201.54 | 55.37 |
| -2 | 6 | 0  | 6209.53 | 55.10 |
| -2 | 6 | 0  | 6446.16 | 55.39 |
| -2 | 6 | 0  | 6190.40 | 55.30 |
| -2 | 6 | 0  | 5942.94 | 53.99 |
| -2 | 6 | 0  | 5993.97 | 53.79 |
| -2 | 6 | 0  | 5673.64 | 51.29 |
| -2 | 6 | 0  | 6050.11 | 52.02 |
| -2 | 6 | 0  | 5786.07 | 55.18 |
| -2 | 6 | 0  | 6296.43 | 53.25 |
| -2 | 6 | 0  | 6312.65 | 54.69 |
| -2 | 6 | 0  | 6366.24 | 56.14 |
| -2 | 6 | 1  | 126.07  | 3.48  |
| -2 | 6 | 1  | 116.36  | 3.84  |
| -2 | 6 | 1  | 129.77  | 3.41  |
| -2 | 6 | 1  | 104.35  | 3.88  |
| -2 | 6 | 1  | 119.49  | 4.15  |
| -2 | 6 | 1  | 108.99  | 3.67  |
| -2 | 6 | 1  | 120.84  | 3.02  |
| -2 | 6 | 1  | 123.19  | 4.18  |
| -2 | 6 | 1  | 125.43  | 3.99  |
| -2 | 6 | 1  | 106.60  | 4.03  |
| -2 | 6 | 1  | 116.73  | 2.85  |

## CIF 31

|    |   |   |        |      |
|----|---|---|--------|------|
| -2 | 6 | 1 | 123.48 | 3.38 |
| -2 | 6 | 1 | 132.55 | 2.87 |
| -2 | 6 | 1 | 112.10 | 3.83 |
| -2 | 6 | 2 | 416.76 | 8.30 |
| -2 | 6 | 2 | 379.97 | 7.35 |
| -2 | 6 | 2 | 410.94 | 5.80 |
| -2 | 6 | 2 | 453.82 | 6.38 |
| -2 | 6 | 2 | 472.76 | 7.45 |
| -2 | 6 | 2 | 443.87 | 8.03 |
| -2 | 6 | 2 | 435.12 | 8.09 |
| -2 | 6 | 2 | 504.71 | 7.02 |
| -2 | 6 | 2 | 457.89 | 6.30 |
| -2 | 6 | 2 | 417.33 | 8.30 |
| -2 | 6 | 2 | 450.65 | 8.54 |
| -2 | 6 | 2 | 464.14 | 7.24 |
| -2 | 6 | 2 | 444.82 | 8.46 |
| -2 | 6 | 3 | 17.50  | 1.69 |
| -2 | 6 | 3 | 20.40  | 1.55 |
| -2 | 6 | 3 | 18.67  | 1.53 |
| -2 | 6 | 3 | 22.78  | 1.36 |
| -2 | 6 | 3 | 19.41  | 1.98 |
| -2 | 6 | 3 | 21.87  | 1.81 |
| -2 | 6 | 3 | 21.49  | 1.21 |
| -2 | 6 | 3 | 20.56  | 1.65 |
| -2 | 6 | 3 | 20.83  | 1.85 |
| -2 | 6 | 3 | 22.18  | 1.56 |
| -2 | 6 | 3 | 21.93  | 1.43 |
| -2 | 6 | 3 | 21.06  | 2.04 |
| -2 | 6 | 4 | 59.61  | 2.58 |
| -2 | 6 | 4 | 55.59  | 3.19 |
| -2 | 6 | 4 | 55.53  | 2.77 |
| -2 | 6 | 4 | 57.48  | 3.05 |
| -2 | 6 | 4 | 56.23  | 1.95 |
| -2 | 6 | 4 | 68.21  | 2.76 |
| -2 | 6 | 4 | 65.92  | 2.44 |
| -2 | 6 | 5 | 2.06   | 0.84 |
| -2 | 6 | 5 | 0.27   | 0.59 |
| -2 | 6 | 5 | 1.80   | 0.96 |
| -2 | 6 | 5 | 1.32   | 1.14 |
| -2 | 6 | 5 | -0.10  | 0.67 |
| -2 | 6 | 5 | 0.83   | 1.08 |

## CIF 31

|    |   |     |        |       |
|----|---|-----|--------|-------|
| -2 | 6 | 5   | 1.06   | 0.68  |
| -2 | 6 | 5   | 0.60   | 1.25  |
| -2 | 6 | 6   | 181.93 | 5.80  |
| -2 | 6 | 6   | 220.62 | 5.40  |
| -2 | 6 | 6   | 218.63 | 5.16  |
| -2 | 6 | 6   | 188.33 | 6.07  |
| -2 | 6 | 6   | 180.94 | 5.89  |
| -2 | 6 | 6   | 195.55 | 5.50  |
| -2 | 6 | 6   | 203.03 | 5.19  |
| -2 | 6 | 6   | 184.17 | 6.22  |
| -2 | 6 | 7   | 62.87  | 3.40  |
| -2 | 6 | 7   | 56.23  | 3.15  |
| -2 | 6 | 7   | 63.43  | 2.97  |
| -2 | 6 | 7   | 55.69  | 3.63  |
| -2 | 6 | 7   | 57.00  | 3.29  |
| -2 | 6 | 7   | 61.39  | 2.82  |
| -2 | 6 | 7   | 61.85  | 2.88  |
| -2 | 6 | 7   | 56.29  | 3.50  |
| -2 | 6 | 8   | 687.63 | 13.34 |
| -2 | 6 | 8   | 831.24 | 11.80 |
| -2 | 6 | 8   | 640.06 | 11.54 |
| -2 | 6 | 8   | 747.70 | 11.38 |
| -2 | 6 | 8   | 735.68 | 12.14 |
| -2 | 6 | 8   | 809.06 | 11.74 |
| -2 | 6 | 8   | 712.23 | 12.37 |
| -2 | 6 | 8   | 697.40 | 12.77 |
| -2 | 6 | 9   | 16.15  | 2.01  |
| -2 | 6 | 9   | 14.09  | 2.02  |
| -2 | 6 | 9   | 13.69  | 1.49  |
| -2 | 6 | 9   | 15.94  | 1.52  |
| -2 | 6 | 9   | 16.75  | 1.74  |
| -2 | 6 | 9   | 13.42  | 1.75  |
| -2 | 6 | 9   | 17.70  | 1.59  |
| -2 | 6 | 10  | 235.28 | 6.34  |
| -2 | 6 | 10  | 226.33 | 6.47  |
| -2 | 6 | 11  | 109.31 | 3.75  |
| -2 | 6 | 11  | 111.78 | 3.64  |
| -2 | 6 | 12  | 3.05   | 0.65  |
| -2 | 7 | -14 | 44.51  | 1.45  |
| -2 | 7 | -13 | 15.36  | 1.26  |
| -2 | 7 | -13 | 18.90  | 1.67  |

## CIF 31

|    |   |     |         |       |
|----|---|-----|---------|-------|
| -2 | 7 | -13 | 15.40   | 1.25  |
| -2 | 7 | -12 | 7.41    | 1.46  |
| -2 | 7 | -12 | 7.86    | 1.18  |
| -2 | 7 | -12 | 8.27    | 0.99  |
| -2 | 7 | -12 | 8.67    | 1.24  |
| -2 | 7 | -11 | 671.70  | 14.19 |
| -2 | 7 | -11 | 724.56  | 12.93 |
| -2 | 7 | -11 | 739.63  | 11.14 |
| -2 | 7 | -11 | 789.48  | 10.82 |
| -2 | 7 | -11 | 799.16  | 12.22 |
| -2 | 7 | -10 | 16.69   | 2.13  |
| -2 | 7 | -10 | 16.29   | 4.01  |
| -2 | 7 | -10 | 16.70   | 2.07  |
| -2 | 7 | -10 | 14.96   | 2.04  |
| -2 | 7 | -10 | 17.01   | 1.68  |
| -2 | 7 | -10 | 15.12   | 1.81  |
| -2 | 7 | -10 | 19.15   | 1.69  |
| -2 | 7 | -9  | 644.09  | 12.70 |
| -2 | 7 | -9  | 666.70  | 12.74 |
| -2 | 7 | -9  | 718.44  | 13.45 |
| -2 | 7 | -9  | 771.78  | 11.19 |
| -2 | 7 | -9  | 599.12  | 13.87 |
| -2 | 7 | -9  | 705.92  | 13.44 |
| -2 | 7 | -9  | 666.73  | 13.62 |
| -2 | 7 | -9  | 606.50  | 11.22 |
| -2 | 7 | -9  | 646.11  | 10.19 |
| -2 | 7 | -9  | 776.67  | 12.07 |
| -2 | 7 | -8  | 114.74  | 4.83  |
| -2 | 7 | -8  | 112.74  | 4.62  |
| -2 | 7 | -8  | 126.26  | 5.84  |
| -2 | 7 | -8  | 125.56  | 5.35  |
| -2 | 7 | -8  | 107.40  | 4.24  |
| -2 | 7 | -8  | 116.86  | 5.25  |
| -2 | 7 | -8  | 102.61  | 3.51  |
| -2 | 7 | -7  | 3047.63 | 29.73 |
| -2 | 7 | -7  | 2690.66 | 32.44 |
| -2 | 7 | -7  | 2600.06 | 30.87 |
| -2 | 7 | -7  | 2855.32 | 31.64 |
| -2 | 7 | -7  | 2753.61 | 33.36 |
| -2 | 7 | -7  | 2857.06 | 29.90 |
| -2 | 7 | -7  | 2798.24 | 33.05 |

## CIF 31

|    |   |    |         |       |
|----|---|----|---------|-------|
| -2 | 7 | -7 | 2754.19 | 27.84 |
| -2 | 7 | -6 | 77.24   | 3.28  |
| -2 | 7 | -6 | 80.32   | 4.10  |
| -2 | 7 | -6 | 85.76   | 3.82  |
| -2 | 7 | -6 | 89.63   | 4.37  |
| -2 | 7 | -6 | 84.30   | 3.85  |
| -2 | 7 | -6 | 81.51   | 3.05  |
| -2 | 7 | -6 | 89.52   | 4.00  |
| -2 | 7 | -6 | 90.01   | 4.27  |
| -2 | 7 | -6 | 80.10   | 3.23  |
| -2 | 7 | -6 | 80.85   | 2.81  |
| -2 | 7 | -5 | 753.63  | 10.77 |
| -2 | 7 | -5 | 822.76  | 11.72 |
| -2 | 7 | -5 | 792.58  | 13.03 |
| -2 | 7 | -5 | 772.94  | 12.67 |
| -2 | 7 | -5 | 805.82  | 10.81 |
| -2 | 7 | -5 | 755.90  | 13.12 |
| -2 | 7 | -5 | 777.75  | 12.03 |
| -2 | 7 | -5 | 753.37  | 13.20 |
| -2 | 7 | -5 | 757.71  | 11.58 |
| -2 | 7 | -5 | 772.54  | 9.90  |
| -2 | 7 | -4 | 433.09  | 7.55  |
| -2 | 7 | -4 | 441.31  | 8.99  |
| -2 | 7 | -4 | 396.78  | 6.97  |
| -2 | 7 | -4 | 431.19  | 7.85  |
| -2 | 7 | -4 | 454.66  | 9.22  |
| -2 | 7 | -4 | 434.35  | 9.12  |
| -2 | 7 | -4 | 449.80  | 8.66  |
| -2 | 7 | -4 | 430.41  | 7.17  |
| -2 | 7 | -4 | 448.36  | 9.01  |
| -2 | 7 | -4 | 413.89  | 7.37  |
| -2 | 7 | -4 | 458.29  | 9.25  |
| -2 | 7 | -4 | 464.47  | 8.57  |
| -2 | 7 | -4 | 462.88  | 9.52  |
| -2 | 7 | -3 | 71.73   | 2.53  |
| -2 | 7 | -3 | 73.55   | 3.31  |
| -2 | 7 | -3 | 64.00   | 3.33  |
| -2 | 7 | -3 | 65.72   | 3.13  |
| -2 | 7 | -3 | 64.66   | 2.84  |
| -2 | 7 | -3 | 70.19   | 2.87  |
| -2 | 7 | -3 | 57.33   | 3.07  |

## CIF 31

|    |   |    |         |       |
|----|---|----|---------|-------|
| -2 | 7 | -3 | 69.85   | 3.30  |
| -2 | 7 | -3 | 58.05   | 2.96  |
| -2 | 7 | -3 | 63.76   | 3.26  |
| -2 | 7 | -3 | 73.00   | 2.60  |
| -2 | 7 | -3 | 71.28   | 2.73  |
| -2 | 7 | -3 | 64.54   | 2.85  |
| -2 | 7 | -3 | 64.28   | 3.09  |
| -2 | 7 | -3 | 70.58   | 3.53  |
| -2 | 7 | -2 | 280.99  | 4.73  |
| -2 | 7 | -2 | 292.11  | 6.69  |
| -2 | 7 | -2 | 299.27  | 6.51  |
| -2 | 7 | -2 | 320.17  | 6.26  |
| -2 | 7 | -2 | 294.98  | 6.90  |
| -2 | 7 | -2 | 321.63  | 7.17  |
| -2 | 7 | -2 | 318.53  | 7.08  |
| -2 | 7 | -2 | 315.08  | 5.66  |
| -2 | 7 | -2 | 286.38  | 7.18  |
| -2 | 7 | -2 | 306.85  | 5.69  |
| -2 | 7 | -2 | 343.07  | 7.30  |
| -2 | 7 | -2 | 256.71  | 6.22  |
| -2 | 7 | -2 | 297.54  | 6.00  |
| -2 | 7 | -2 | 300.17  | 6.03  |
| -2 | 7 | -1 | 644.86  | 10.67 |
| -2 | 7 | -1 | 654.15  | 10.40 |
| -2 | 7 | -1 | 605.64  | 10.57 |
| -2 | 7 | -1 | 680.05  | 10.81 |
| -2 | 7 | -1 | 658.76  | 9.73  |
| -2 | 7 | -1 | 699.12  | 11.44 |
| -2 | 7 | -1 | 651.04  | 10.57 |
| -2 | 7 | -1 | 639.11  | 10.05 |
| -2 | 7 | -1 | 646.88  | 10.87 |
| -2 | 7 | -1 | 633.60  | 8.12  |
| -2 | 7 | -1 | 597.77  | 10.00 |
| -2 | 7 | -1 | 686.50  | 9.04  |
| -2 | 7 | -1 | 667.02  | 11.09 |
| -2 | 7 | -1 | 654.33  | 9.54  |
| -2 | 7 | -1 | 629.69  | 8.85  |
| -2 | 7 | 0  | 913.24  | 12.94 |
| -2 | 7 | 0  | 925.79  | 14.03 |
| -2 | 7 | 0  | 992.97  | 14.35 |
| -2 | 7 | 0  | 1032.24 | 12.88 |



## CIF 31

|    |   |   |         |       |
|----|---|---|---------|-------|
| -2 | 7 | 0 | 1044.23 | 15.14 |
| -2 | 7 | 0 | 1001.80 | 14.22 |
| -2 | 7 | 0 | 915.87  | 13.88 |
| -2 | 7 | 0 | 980.94  | 13.27 |
| -2 | 7 | 0 | 1018.72 | 11.35 |
| -2 | 7 | 0 | 951.50  | 11.50 |
| -2 | 7 | 0 | 997.13  | 12.04 |
| -2 | 7 | 0 | 992.73  | 14.48 |
| -2 | 7 | 0 | 939.63  | 14.33 |
| -2 | 7 | 0 | 976.92  | 12.52 |
| -2 | 7 | 0 | 965.65  | 13.66 |
| -2 | 7 | 1 | 503.78  | 8.50  |
| -2 | 7 | 1 | 514.24  | 9.64  |
| -2 | 7 | 1 | 540.25  | 10.08 |
| -2 | 7 | 1 | 544.33  | 8.68  |
| -2 | 7 | 1 | 515.86  | 10.11 |
| -2 | 7 | 1 | 533.43  | 8.05  |
| -2 | 7 | 1 | 514.59  | 9.40  |
| -2 | 7 | 1 | 516.50  | 7.31  |
| -2 | 7 | 1 | 513.57  | 9.65  |
| -2 | 7 | 1 | 543.27  | 10.14 |
| -2 | 7 | 1 | 539.79  | 7.61  |
| -2 | 7 | 1 | 509.90  | 7.36  |
| -2 | 7 | 1 | 498.05  | 8.37  |
| -2 | 7 | 1 | 559.98  | 8.55  |
| -2 | 7 | 1 | 543.20  | 9.95  |
| -2 | 7 | 2 | 16.56   | 1.77  |
| -2 | 7 | 2 | 14.24   | 1.90  |
| -2 | 7 | 2 | 18.19   | 1.63  |
| -2 | 7 | 2 | 14.27   | 1.59  |
| -2 | 7 | 2 | 13.85   | 1.93  |
| -2 | 7 | 2 | 18.13   | 1.47  |
| -2 | 7 | 2 | 14.39   | 1.81  |
| -2 | 7 | 2 | 15.73   | 1.14  |
| -2 | 7 | 2 | 17.26   | 1.26  |
| -2 | 7 | 2 | 15.15   | 1.90  |
| -2 | 7 | 2 | 16.16   | 1.46  |
| -2 | 7 | 2 | 12.98   | 1.81  |
| -2 | 7 | 3 | 10.21   | 1.53  |
| -2 | 7 | 3 | 7.80    | 0.98  |
| -2 | 7 | 3 | 10.51   | 1.33  |

## CIF 31

|    |   |   |        |      |
|----|---|---|--------|------|
| -2 | 7 | 3 | 3.98   | 1.01 |
| -2 | 7 | 3 | 6.96   | 1.41 |
| -2 | 7 | 3 | 4.79   | 0.96 |
| -2 | 7 | 3 | 5.63   | 1.64 |
| -2 | 7 | 3 | 7.97   | 0.86 |
| -2 | 7 | 3 | 5.26   | 1.20 |
| -2 | 7 | 3 | 5.91   | 1.43 |
| -2 | 7 | 3 | 5.26   | 0.98 |
| -2 | 7 | 3 | 8.93   | 1.80 |
| -2 | 7 | 4 | 278.27 | 7.62 |
| -2 | 7 | 4 | 297.19 | 8.04 |
| -2 | 7 | 4 | 329.17 | 6.76 |
| -2 | 7 | 4 | 244.65 | 6.53 |
| -2 | 7 | 4 | 328.89 | 6.20 |
| -2 | 7 | 4 | 271.55 | 6.92 |
| -2 | 7 | 4 | 333.19 | 6.47 |
| -2 | 7 | 4 | 283.04 | 7.42 |
| -2 | 7 | 4 | 289.67 | 6.27 |
| -2 | 7 | 4 | 236.53 | 7.24 |
| -2 | 7 | 5 | 33.22  | 2.24 |
| -2 | 7 | 5 | 27.42  | 2.18 |
| -2 | 7 | 5 | 29.19  | 2.61 |
| -2 | 7 | 5 | 25.80  | 2.51 |
| -2 | 7 | 5 | 32.39  | 1.96 |
| -2 | 7 | 5 | 30.55  | 2.03 |
| -2 | 7 | 5 | 26.62  | 2.31 |
| -2 | 7 | 5 | 30.21  | 2.02 |
| -2 | 7 | 5 | 31.16  | 2.73 |
| -2 | 7 | 6 | 73.54  | 3.94 |
| -2 | 7 | 6 | 72.57  | 3.82 |
| -2 | 7 | 6 | 92.28  | 3.69 |
| -2 | 7 | 6 | 95.70  | 3.44 |
| -2 | 7 | 6 | 72.83  | 3.99 |
| -2 | 7 | 6 | 99.43  | 3.66 |
| -2 | 7 | 6 | 76.52  | 3.61 |
| -2 | 7 | 6 | 88.76  | 3.49 |
| -2 | 7 | 6 | 85.37  | 4.38 |
| -2 | 7 | 7 | 152.73 | 5.44 |
| -2 | 7 | 7 | 142.09 | 4.93 |
| -2 | 7 | 7 | 160.66 | 4.86 |
| -2 | 7 | 7 | 141.25 | 5.79 |

## CIF 31

|    |   |     |        |      |
|----|---|-----|--------|------|
| -2 | 7 | 7   | 138.97 | 5.21 |
| -2 | 7 | 7   | 168.60 | 4.79 |
| -2 | 7 | 7   | 176.13 | 4.90 |
| -2 | 7 | 7   | 143.97 | 5.56 |
| -2 | 7 | 8   | 180.44 | 5.36 |
| -2 | 7 | 8   | 175.56 | 6.10 |
| -2 | 7 | 8   | 160.70 | 5.10 |
| -2 | 7 | 8   | 181.98 | 6.13 |
| -2 | 7 | 8   | 198.73 | 5.01 |
| -2 | 7 | 8   | 184.51 | 5.74 |
| -2 | 7 | 8   | 180.19 | 5.94 |
| -2 | 7 | 9   | 114.28 | 4.44 |
| -2 | 7 | 9   | 102.34 | 4.21 |
| -2 | 7 | 9   | 108.76 | 4.39 |
| -2 | 7 | 9   | 102.40 | 3.59 |
| -2 | 7 | 9   | 92.96  | 3.79 |
| -2 | 7 | 10  | 515.17 | 8.79 |
| -2 | 7 | 10  | 469.25 | 8.29 |
| -2 | 7 | 11  | 80.94  | 2.57 |
| -2 | 7 | 11  | 91.86  | 2.76 |
| -2 | 8 | -13 | 8.52   | 1.12 |
| -2 | 8 | -13 | 8.14   | 0.91 |
| -2 | 8 | -13 | 7.02   | 0.86 |
| -2 | 8 | -12 | 1.41   | 1.00 |
| -2 | 8 | -12 | 1.46   | 0.76 |
| -2 | 8 | -12 | 1.73   | 0.81 |
| -2 | 8 | -11 | 128.37 | 5.61 |
| -2 | 8 | -11 | 127.62 | 4.65 |
| -2 | 8 | -11 | 122.44 | 4.60 |
| -2 | 8 | -11 | 122.44 | 3.82 |
| -2 | 8 | -10 | 305.75 | 9.28 |
| -2 | 8 | -10 | 342.62 | 8.33 |
| -2 | 8 | -10 | 337.25 | 8.63 |
| -2 | 8 | -10 | 351.26 | 8.78 |
| -2 | 8 | -10 | 371.40 | 7.16 |
| -2 | 8 | -10 | 323.50 | 7.65 |
| -2 | 8 | -10 | 321.56 | 7.48 |
| -2 | 8 | -9  | 24.79  | 2.42 |
| -2 | 8 | -9  | 24.46  | 2.52 |
| -2 | 8 | -9  | 23.28  | 2.82 |
| -2 | 8 | -9  | 24.56  | 2.26 |

## CIF 31

|    |   |    |        |       |
|----|---|----|--------|-------|
| -2 | 8 | -9 | 26.72  | 2.72  |
| -2 | 8 | -9 | 26.43  | 2.75  |
| -2 | 8 | -9 | 36.14  | 2.30  |
| -2 | 8 | -9 | 29.01  | 2.40  |
| -2 | 8 | -9 | 33.38  | 1.95  |
| -2 | 8 | -8 | 521.66 | 10.85 |
| -2 | 8 | -8 | 537.31 | 10.92 |
| -2 | 8 | -8 | 511.52 | 11.56 |
| -2 | 8 | -8 | 523.91 | 10.05 |
| -2 | 8 | -8 | 490.12 | 11.42 |
| -2 | 8 | -8 | 508.99 | 12.23 |
| -2 | 8 | -8 | 532.50 | 8.28  |
| -2 | 8 | -8 | 544.93 | 9.62  |
| -2 | 8 | -7 | 10.10  | 2.02  |
| -2 | 8 | -7 | 13.22  | 1.96  |
| -2 | 8 | -7 | 10.21  | 1.65  |
| -2 | 8 | -7 | 10.21  | 1.69  |
| -2 | 8 | -7 | 12.21  | 2.07  |
| -2 | 8 | -7 | 11.71  | 1.96  |
| -2 | 8 | -6 | 794.58 | 14.53 |
| -2 | 8 | -6 | 815.08 | 11.60 |
| -2 | 8 | -6 | 770.29 | 14.41 |
| -2 | 8 | -6 | 757.02 | 13.05 |
| -2 | 8 | -6 | 887.69 | 14.57 |
| -2 | 8 | -6 | 834.32 | 14.01 |
| -2 | 8 | -6 | 811.64 | 14.44 |
| -2 | 8 | -6 | 750.46 | 11.95 |
| -2 | 8 | -6 | 806.50 | 12.36 |
| -2 | 8 | -6 | 853.95 | 12.06 |
| -2 | 8 | -5 | 201.29 | 5.94  |
| -2 | 8 | -5 | 193.62 | 6.39  |
| -2 | 8 | -5 | 136.78 | 5.38  |
| -2 | 8 | -5 | 178.89 | 5.30  |
| -2 | 8 | -5 | 188.91 | 6.32  |
| -2 | 8 | -5 | 223.06 | 5.24  |
| -2 | 8 | -5 | 172.74 | 5.92  |
| -2 | 8 | -5 | 129.02 | 4.83  |
| -2 | 8 | -5 | 186.05 | 6.41  |
| -2 | 8 | -5 | 192.21 | 5.26  |
| -2 | 8 | -5 | 193.23 | 6.52  |
| -2 | 8 | -5 | 195.32 | 5.66  |

## CIF 31

|    |   |    |        |       |
|----|---|----|--------|-------|
| -2 | 8 | -5 | 210.76 | 5.06  |
| -2 | 8 | -4 | 810.98 | 13.99 |
| -2 | 8 | -4 | 812.99 | 12.11 |
| -2 | 8 | -4 | 797.55 | 13.83 |
| -2 | 8 | -4 | 716.90 | 12.58 |
| -2 | 8 | -4 | 804.43 | 11.26 |
| -2 | 8 | -4 | 782.44 | 12.98 |
| -2 | 8 | -4 | 745.15 | 13.62 |
| -2 | 8 | -4 | 782.23 | 11.68 |
| -2 | 8 | -4 | 778.74 | 11.48 |
| -2 | 8 | -4 | 798.59 | 12.86 |
| -2 | 8 | -4 | 745.03 | 13.44 |
| -2 | 8 | -4 | 756.49 | 10.61 |
| -2 | 8 | -3 | 7.25   | 1.27  |
| -2 | 8 | -3 | 5.70   | 1.17  |
| -2 | 8 | -3 | 4.30   | 1.37  |
| -2 | 8 | -3 | 2.27   | 1.32  |
| -2 | 8 | -3 | 6.02   | 1.48  |
| -2 | 8 | -3 | 6.66   | 1.26  |
| -2 | 8 | -3 | 5.52   | 1.43  |
| -2 | 8 | -3 | 4.70   | 1.37  |
| -2 | 8 | -3 | 4.82   | 0.99  |
| -2 | 8 | -3 | 4.26   | 1.15  |
| -2 | 8 | -3 | 3.33   | 1.25  |
| -2 | 8 | -3 | 3.87   | 1.25  |
| -2 | 8 | -2 | 846.44 | 13.22 |
| -2 | 8 | -2 | 869.19 | 12.53 |
| -2 | 8 | -2 | 877.57 | 14.71 |
| -2 | 8 | -2 | 875.29 | 13.98 |
| -2 | 8 | -2 | 823.19 | 13.14 |
| -2 | 8 | -2 | 798.37 | 13.15 |
| -2 | 8 | -2 | 793.15 | 13.33 |
| -2 | 8 | -2 | 896.48 | 11.74 |
| -2 | 8 | -2 | 901.51 | 11.87 |
| -2 | 8 | -2 | 910.10 | 14.30 |
| -2 | 8 | -2 | 874.89 | 12.26 |
| -2 | 8 | -2 | 846.14 | 12.32 |
| -2 | 8 | -1 | 179.85 | 5.47  |
| -2 | 8 | -1 | 187.07 | 5.82  |
| -2 | 8 | -1 | 205.03 | 5.31  |
| -2 | 8 | -1 | 196.64 | 6.47  |

## CIF 31

|    |   |    |         |       |
|----|---|----|---------|-------|
| -2 | 8 | -1 | 193.73  | 6.03  |
| -2 | 8 | -1 | 189.93  | 5.17  |
| -2 | 8 | -1 | 190.93  | 5.92  |
| -2 | 8 | -1 | 197.33  | 6.26  |
| -2 | 8 | -1 | 186.54  | 4.50  |
| -2 | 8 | -1 | 185.10  | 5.90  |
| -2 | 8 | -1 | 179.95  | 5.56  |
| -2 | 8 | -1 | 191.98  | 6.17  |
| -2 | 8 | -1 | 194.61  | 5.02  |
| -2 | 8 | -1 | 186.79  | 4.68  |
| -2 | 8 | -1 | 186.70  | 5.43  |
| -2 | 8 | 0  | 1912.32 | 23.21 |
| -2 | 8 | 0  | 1971.59 | 21.26 |
| -2 | 8 | 0  | 1794.15 | 23.01 |
| -2 | 8 | 0  | 1814.52 | 22.55 |
| -2 | 8 | 0  | 1695.38 | 22.44 |
| -2 | 8 | 0  | 1618.75 | 20.71 |
| -2 | 8 | 0  | 1819.37 | 23.68 |
| -2 | 8 | 0  | 1822.34 | 18.93 |
| -2 | 8 | 0  | 1733.50 | 18.98 |
| -2 | 8 | 0  | 1722.91 | 22.75 |
| -2 | 8 | 0  | 1715.91 | 22.99 |
| -2 | 8 | 0  | 1886.70 | 20.63 |
| -2 | 8 | 0  | 1822.47 | 22.19 |
| -2 | 8 | 0  | 1849.09 | 20.02 |
| -2 | 8 | 1  | 938.23  | 14.88 |
| -2 | 8 | 1  | 885.51  | 12.73 |
| -2 | 8 | 1  | 848.02  | 14.16 |
| -2 | 8 | 1  | 841.45  | 14.47 |
| -2 | 8 | 1  | 881.41  | 13.89 |
| -2 | 8 | 1  | 840.44  | 14.05 |
| -2 | 8 | 1  | 887.66  | 12.13 |
| -2 | 8 | 1  | 870.19  | 14.73 |
| -2 | 8 | 1  | 868.46  | 11.20 |
| -2 | 8 | 1  | 857.61  | 10.88 |
| -2 | 8 | 1  | 824.75  | 12.04 |
| -2 | 8 | 1  | 815.98  | 13.89 |
| -2 | 8 | 2  | 151.47  | 5.75  |
| -2 | 8 | 2  | 141.02  | 5.19  |
| -2 | 8 | 2  | 163.38  | 4.55  |
| -2 | 8 | 2  | 150.31  | 5.59  |

## CIF 31

|    |   |   |        |      |
|----|---|---|--------|------|
| -2 | 8 | 2 | 154.43 | 5.14 |
| -2 | 8 | 2 | 165.65 | 4.23 |
| -2 | 8 | 2 | 148.97 | 5.77 |
| -2 | 8 | 2 | 156.88 | 5.86 |
| -2 | 8 | 2 | 165.78 | 4.69 |
| -2 | 8 | 2 | 151.34 | 5.56 |
| -2 | 8 | 2 | 148.34 | 5.46 |
| -2 | 8 | 3 | 2.00   | 1.04 |
| -2 | 8 | 3 | 1.91   | 1.00 |
| -2 | 8 | 3 | 2.41   | 0.90 |
| -2 | 8 | 3 | 2.15   | 1.30 |
| -2 | 8 | 3 | 3.21   | 1.22 |
| -2 | 8 | 3 | 2.26   | 0.79 |
| -2 | 8 | 3 | 1.82   | 1.31 |
| -2 | 8 | 3 | 1.50   | 0.84 |
| -2 | 8 | 3 | 2.43   | 1.57 |
| -2 | 8 | 4 | 61.09  | 3.42 |
| -2 | 8 | 4 | 65.86  | 3.18 |
| -2 | 8 | 4 | 68.42  | 3.05 |
| -2 | 8 | 4 | 74.53  | 2.99 |
| -2 | 8 | 4 | 68.49  | 4.03 |
| -2 | 8 | 4 | 70.73  | 3.82 |
| -2 | 8 | 4 | 63.87  | 3.88 |
| -2 | 8 | 4 | 67.25  | 4.02 |
| -2 | 8 | 4 | 62.94  | 2.95 |
| -2 | 8 | 5 | 14.34  | 1.51 |
| -2 | 8 | 5 | 8.16   | 1.72 |
| -2 | 8 | 5 | 12.14  | 1.50 |
| -2 | 8 | 5 | 9.55   | 1.27 |
| -2 | 8 | 5 | 8.99   | 2.02 |
| -2 | 8 | 5 | 9.71   | 1.50 |
| -2 | 8 | 5 | 8.59   | 1.83 |
| -2 | 8 | 5 | 9.06   | 1.84 |
| -2 | 8 | 5 | 9.99   | 1.65 |
| -2 | 8 | 5 | 10.49  | 1.34 |
| -2 | 8 | 6 | 178.21 | 6.02 |
| -2 | 8 | 6 | 166.46 | 5.61 |
| -2 | 8 | 6 | 201.74 | 5.02 |
| -2 | 8 | 6 | 155.86 | 6.05 |
| -2 | 8 | 6 | 194.50 | 5.13 |
| -2 | 8 | 6 | 163.28 | 5.82 |

## CIF 31

|    |   |     |        |      |
|----|---|-----|--------|------|
| -2 | 8 | 6   | 155.50 | 5.10 |
| -2 | 8 | 6   | 183.53 | 4.92 |
| -2 | 8 | 6   | 180.56 | 6.33 |
| -2 | 8 | 7   | 227.86 | 6.64 |
| -2 | 8 | 7   | 245.73 | 6.55 |
| -2 | 8 | 7   | 217.51 | 5.70 |
| -2 | 8 | 7   | 216.89 | 6.25 |
| -2 | 8 | 7   | 257.53 | 6.86 |
| -2 | 8 | 7   | 249.36 | 7.00 |
| -2 | 8 | 8   | 58.51  | 2.71 |
| -2 | 8 | 8   | 66.50  | 3.41 |
| -2 | 8 | 8   | 53.17  | 2.99 |
| -2 | 8 | 8   | 65.57  | 3.06 |
| -2 | 8 | 8   | 59.74  | 3.12 |
| -2 | 8 | 9   | 113.13 | 3.79 |
| -2 | 8 | 9   | 110.62 | 3.74 |
| -2 | 8 | 10  | 17.34  | 1.22 |
| -2 | 8 | 10  | 16.35  | 1.27 |
| -2 | 9 | -13 | 91.94  | 2.15 |
| -2 | 9 | -13 | 92.49  | 2.24 |
| -2 | 9 | -12 | 46.20  | 1.92 |
| -2 | 9 | -12 | 40.64  | 2.18 |
| -2 | 9 | -11 | 294.45 | 6.63 |
| -2 | 9 | -11 | 281.42 | 6.77 |
| -2 | 9 | -11 | 283.05 | 6.83 |
| -2 | 9 | -10 | 153.99 | 5.12 |
| -2 | 9 | -10 | 134.94 | 5.68 |
| -2 | 9 | -10 | 152.90 | 5.57 |
| -2 | 9 | -10 | 151.97 | 5.59 |
| -2 | 9 | -10 | 170.33 | 4.49 |
| -2 | 9 | -9  | 7.73   | 1.78 |
| -2 | 9 | -9  | 6.61   | 1.45 |
| -2 | 9 | -9  | 8.86   | 1.54 |
| -2 | 9 | -9  | 10.81  | 1.93 |
| -2 | 9 | -9  | 9.06   | 1.40 |
| -2 | 9 | -9  | 9.18   | 1.84 |
| -2 | 9 | -9  | 8.02   | 1.81 |
| -2 | 9 | -8  | 84.99  | 4.64 |
| -2 | 9 | -8  | 107.20 | 4.45 |
| -2 | 9 | -8  | 107.03 | 4.73 |
| -2 | 9 | -8  | 112.70 | 5.35 |



## CIF 31

|    |   |    |         |       |
|----|---|----|---------|-------|
| -2 | 9 | -8 | 91.78   | 4.81  |
| -2 | 9 | -8 | 95.21   | 4.08  |
| -2 | 9 | -7 | 106.13  | 5.09  |
| -2 | 9 | -7 | 93.50   | 4.90  |
| -2 | 9 | -7 | 105.15  | 4.93  |
| -2 | 9 | -7 | 107.37  | 4.69  |
| -2 | 9 | -7 | 92.83   | 4.17  |
| -2 | 9 | -7 | 99.56   | 4.19  |
| -2 | 9 | -7 | 106.27  | 5.07  |
| -2 | 9 | -7 | 112.05  | 3.94  |
| -2 | 9 | -6 | 489.05  | 10.60 |
| -2 | 9 | -6 | 523.55  | 11.29 |
| -2 | 9 | -6 | 395.35  | 9.85  |
| -2 | 9 | -6 | 434.75  | 9.47  |
| -2 | 9 | -6 | 478.43  | 10.74 |
| -2 | 9 | -6 | 499.21  | 9.36  |
| -2 | 9 | -6 | 536.59  | 8.96  |
| -2 | 9 | -5 | 46.62   | 3.11  |
| -2 | 9 | -5 | 50.36   | 2.92  |
| -2 | 9 | -5 | 52.76   | 3.65  |
| -2 | 9 | -5 | 46.24   | 3.41  |
| -2 | 9 | -5 | 53.89   | 2.68  |
| -2 | 9 | -5 | 40.29   | 2.96  |
| -2 | 9 | -5 | 32.18   | 2.41  |
| -2 | 9 | -5 | 41.81   | 3.29  |
| -2 | 9 | -5 | 48.21   | 2.71  |
| -2 | 9 | -5 | 47.68   | 2.96  |
| -2 | 9 | -4 | 1180.10 | 15.77 |
| -2 | 9 | -4 | 1098.49 | 17.68 |
| -2 | 9 | -4 | 1081.05 | 17.61 |
| -2 | 9 | -4 | 1089.65 | 14.33 |
| -2 | 9 | -4 | 953.11  | 15.37 |
| -2 | 9 | -4 | 963.68  | 16.60 |
| -2 | 9 | -4 | 1051.83 | 16.54 |
| -2 | 9 | -4 | 1140.35 | 14.86 |
| -2 | 9 | -4 | 1013.45 | 16.14 |
| -2 | 9 | -3 | 1.43    | 1.27  |
| -2 | 9 | -3 | 0.82    | 1.51  |
| -2 | 9 | -3 | 3.24    | 0.93  |
| -2 | 9 | -3 | 3.11    | 1.10  |
| -2 | 9 | -3 | 2.81    | 1.24  |

## CIF 31

|    |   |    |        |       |
|----|---|----|--------|-------|
| -2 | 9 | -3 | 1.24   | 1.06  |
| -2 | 9 | -3 | 1.98   | 1.12  |
| -2 | 9 | -3 | 1.96   | 0.90  |
| -2 | 9 | -3 | 3.68   | 1.36  |
| -2 | 9 | -2 | 651.80 | 12.45 |
| -2 | 9 | -2 | 643.69 | 11.79 |
| -2 | 9 | -2 | 647.15 | 11.02 |
| -2 | 9 | -2 | 646.47 | 11.82 |
| -2 | 9 | -2 | 613.16 | 11.83 |
| -2 | 9 | -2 | 647.40 | 10.02 |
| -2 | 9 | -2 | 646.98 | 12.46 |
| -2 | 9 | -2 | 664.74 | 10.35 |
| -2 | 9 | -2 | 632.86 | 12.83 |
| -2 | 9 | -2 | 644.62 | 11.30 |
| -2 | 9 | -2 | 645.78 | 10.76 |
| -2 | 9 | -1 | 12.13  | 1.88  |
| -2 | 9 | -1 | 11.64  | 1.57  |
| -2 | 9 | -1 | 9.22   | 1.86  |
| -2 | 9 | -1 | 10.72  | 2.05  |
| -2 | 9 | -1 | 10.09  | 1.79  |
| -2 | 9 | -1 | 7.93   | 1.44  |
| -2 | 9 | -1 | 9.33   | 1.17  |
| -2 | 9 | -1 | 12.64  | 2.02  |
| -2 | 9 | -1 | 7.49   | 1.86  |
| -2 | 9 | -1 | 13.34  | 1.45  |
| -2 | 9 | -1 | 12.65  | 1.89  |
| -2 | 9 | -1 | 8.82   | 1.30  |
| -2 | 9 | -1 | 12.31  | 1.64  |
| -2 | 9 | 0  | 345.85 | 8.66  |
| -2 | 9 | 0  | 336.42 | 7.56  |
| -2 | 9 | 0  | 332.09 | 8.71  |
| -2 | 9 | 0  | 321.11 | 8.88  |
| -2 | 9 | 0  | 331.10 | 8.40  |
| -2 | 9 | 0  | 306.93 | 8.36  |
| -2 | 9 | 0  | 297.47 | 7.38  |
| -2 | 9 | 0  | 320.43 | 8.50  |
| -2 | 9 | 0  | 305.78 | 8.58  |
| -2 | 9 | 0  | 316.98 | 6.86  |
| -2 | 9 | 0  | 333.21 | 6.94  |
| -2 | 9 | 0  | 323.54 | 8.01  |
| -2 | 9 | 1  | 25.47  | 2.58  |

## CIF 31

|    |   |   |        |      |
|----|---|---|--------|------|
| -2 | 9 | 1 | 22.29  | 2.56 |
| -2 | 9 | 1 | 24.73  | 2.30 |
| -2 | 9 | 1 | 28.27  | 2.18 |
| -2 | 9 | 1 | 27.88  | 2.02 |
| -2 | 9 | 1 | 23.11  | 2.52 |
| -2 | 9 | 1 | 23.92  | 2.31 |
| -2 | 9 | 1 | 22.69  | 2.35 |
| -2 | 9 | 1 | 24.66  | 2.67 |
| -2 | 9 | 1 | 24.76  | 1.92 |
| -2 | 9 | 1 | 23.86  | 2.37 |
| -2 | 9 | 2 | 2.80   | 1.61 |
| -2 | 9 | 2 | 2.22   | 1.25 |
| -2 | 9 | 2 | 3.00   | 1.08 |
| -2 | 9 | 2 | 2.07   | 0.90 |
| -2 | 9 | 2 | 4.29   | 1.46 |
| -2 | 9 | 2 | 1.60   | 1.28 |
| -2 | 9 | 2 | 2.48   | 1.37 |
| -2 | 9 | 2 | 2.40   | 1.49 |
| -2 | 9 | 2 | 2.60   | 1.45 |
| -2 | 9 | 2 | 2.66   | 0.91 |
| -2 | 9 | 2 | 2.66   | 1.45 |
| -2 | 9 | 3 | 115.20 | 4.28 |
| -2 | 9 | 3 | 115.58 | 4.49 |
| -2 | 9 | 3 | 115.44 | 4.82 |
| -2 | 9 | 3 | 116.93 | 4.03 |
| -2 | 9 | 3 | 112.10 | 5.02 |
| -2 | 9 | 3 | 121.62 | 4.91 |
| -2 | 9 | 3 | 114.14 | 5.02 |
| -2 | 9 | 3 | 107.10 | 3.81 |
| -2 | 9 | 3 | 116.92 | 5.11 |
| -2 | 9 | 4 | 196.22 | 6.63 |
| -2 | 9 | 4 | 170.17 | 6.24 |
| -2 | 9 | 4 | 184.40 | 6.10 |
| -2 | 9 | 4 | 177.14 | 6.33 |
| -2 | 9 | 4 | 193.40 | 5.89 |
| -2 | 9 | 4 | 185.72 | 6.45 |
| -2 | 9 | 4 | 186.18 | 4.96 |
| -2 | 9 | 4 | 189.98 | 6.50 |
| -2 | 9 | 5 | 55.40  | 3.44 |
| -2 | 9 | 5 | 60.52  | 3.52 |
| -2 | 9 | 5 | 52.42  | 3.26 |

## CIF 31

|    |    |     |        |       |
|----|----|-----|--------|-------|
| -2 | 9  | 5   | 59.62  | 2.97  |
| -2 | 9  | 5   | 54.05  | 3.48  |
| -2 | 9  | 5   | 51.91  | 3.04  |
| -2 | 9  | 5   | 55.54  | 3.51  |
| -2 | 9  | 5   | 53.98  | 3.46  |
| -2 | 9  | 6   | 6.03   | 1.40  |
| -2 | 9  | 6   | 4.16   | 1.21  |
| -2 | 9  | 6   | 4.23   | 1.48  |
| -2 | 9  | 6   | 4.08   | 1.17  |
| -2 | 9  | 6   | 4.53   | 1.17  |
| -2 | 9  | 6   | 4.18   | 1.37  |
| -2 | 9  | 6   | 4.84   | 1.32  |
| -2 | 9  | 7   | 97.37  | 3.85  |
| -2 | 9  | 7   | 90.39  | 3.43  |
| -2 | 9  | 7   | 93.50  | 3.61  |
| -2 | 9  | 7   | 84.71  | 3.58  |
| -2 | 9  | 8   | 15.89  | 1.49  |
| -2 | 9  | 8   | 16.45  | 1.59  |
| -2 | 9  | 8   | 15.24  | 1.47  |
| -2 | 9  | 8   | 15.13  | 1.22  |
| -2 | 10 | -12 | 0.05   | 0.40  |
| -2 | 10 | -12 | 0.97   | 0.48  |
| -2 | 10 | -12 | 0.94   | 0.52  |
| -2 | 10 | -11 | 0.08   | 0.62  |
| -2 | 10 | -11 | 0.07   | 0.74  |
| -2 | 10 | -11 | -0.10  | 0.77  |
| -2 | 10 | -11 | 0.73   | 0.61  |
| -2 | 10 | -10 | 118.50 | 4.54  |
| -2 | 10 | -10 | 119.49 | 4.60  |
| -2 | 10 | -10 | 129.30 | 3.57  |
| -2 | 10 | -9  | 9.77   | 1.37  |
| -2 | 10 | -9  | 11.85  | 1.59  |
| -2 | 10 | -9  | 10.49  | 1.86  |
| -2 | 10 | -9  | 14.46  | 1.48  |
| -2 | 10 | -9  | 10.77  | 1.94  |
| -2 | 10 | -8  | 719.64 | 13.72 |
| -2 | 10 | -8  | 669.08 | 11.91 |
| -2 | 10 | -8  | 686.38 | 13.18 |
| -2 | 10 | -8  | 645.38 | 11.18 |
| -2 | 10 | -8  | 594.97 | 11.99 |
| -2 | 10 | -8  | 545.38 | 10.22 |

## CIF 31

|    |    |    |        |       |
|----|----|----|--------|-------|
| -2 | 10 | -8 | 583.15 | 10.33 |
| -2 | 10 | -7 | 172.73 | 5.24  |
| -2 | 10 | -7 | 211.97 | 6.71  |
| -2 | 10 | -7 | 218.46 | 6.16  |
| -2 | 10 | -7 | 207.71 | 6.47  |
| -2 | 10 | -7 | 179.72 | 5.37  |
| -2 | 10 | -6 | 4.39   | 1.69  |
| -2 | 10 | -6 | 6.31   | 1.75  |
| -2 | 10 | -6 | 5.21   | 1.67  |
| -2 | 10 | -6 | 5.67   | 1.23  |
| -2 | 10 | -6 | 3.50   | 1.04  |
| -2 | 10 | -5 | 22.67  | 2.06  |
| -2 | 10 | -5 | 24.28  | 2.68  |
| -2 | 10 | -5 | 22.58  | 2.70  |
| -2 | 10 | -5 | 21.27  | 2.50  |
| -2 | 10 | -5 | 21.17  | 1.88  |
| -2 | 10 | -5 | 22.35  | 2.18  |
| -2 | 10 | -4 | 86.37  | 3.82  |
| -2 | 10 | -4 | 102.89 | 5.05  |
| -2 | 10 | -4 | 93.09  | 4.86  |
| -2 | 10 | -4 | 92.74  | 4.44  |
| -2 | 10 | -4 | 88.05  | 4.49  |
| -2 | 10 | -4 | 88.70  | 3.53  |
| -2 | 10 | -4 | 93.22  | 4.31  |
| -2 | 10 | -3 | 133.89 | 5.95  |
| -2 | 10 | -3 | 146.99 | 5.63  |
| -2 | 10 | -3 | 143.03 | 5.57  |
| -2 | 10 | -3 | 150.38 | 5.05  |
| -2 | 10 | -3 | 130.39 | 5.32  |
| -2 | 10 | -3 | 152.04 | 5.05  |
| -2 | 10 | -3 | 134.05 | 4.91  |
| -2 | 10 | -3 | 125.08 | 4.07  |
| -2 | 10 | -2 | 20.31  | 2.14  |
| -2 | 10 | -2 | 19.82  | 1.95  |
| -2 | 10 | -2 | 22.16  | 2.55  |
| -2 | 10 | -2 | 20.38  | 2.18  |
| -2 | 10 | -2 | 19.35  | 2.42  |
| -2 | 10 | -2 | 22.90  | 2.22  |
| -2 | 10 | -2 | 20.96  | 2.37  |
| -2 | 10 | -2 | 18.98  | 2.03  |
| -2 | 10 | -1 | 21.20  | 1.99  |

## CIF 31

|    |    |    |        |       |
|----|----|----|--------|-------|
| -2 | 10 | -1 | 23.27  | 2.67  |
| -2 | 10 | -1 | 20.90  | 2.69  |
| -2 | 10 | -1 | 23.09  | 2.36  |
| -2 | 10 | -1 | 22.35  | 2.37  |
| -2 | 10 | -1 | 20.41  | 1.76  |
| -2 | 10 | -1 | 20.84  | 2.43  |
| -2 | 10 | -1 | 21.70  | 2.22  |
| -2 | 10 | -1 | 20.91  | 2.02  |
| -2 | 10 | 0  | 43.32  | 3.18  |
| -2 | 10 | 0  | 42.35  | 2.67  |
| -2 | 10 | 0  | 42.84  | 3.26  |
| -2 | 10 | 0  | 41.92  | 3.48  |
| -2 | 10 | 0  | 42.38  | 3.31  |
| -2 | 10 | 0  | 45.56  | 3.25  |
| -2 | 10 | 0  | 43.36  | 2.48  |
| -2 | 10 | 0  | 44.16  | 2.42  |
| -2 | 10 | 0  | 47.54  | 3.39  |
| -2 | 10 | 0  | 42.61  | 3.06  |
| -2 | 10 | 0  | 44.68  | 2.95  |
| -2 | 10 | 1  | 79.20  | 4.18  |
| -2 | 10 | 1  | 61.97  | 3.18  |
| -2 | 10 | 1  | 77.53  | 4.07  |
| -2 | 10 | 1  | 71.57  | 4.10  |
| -2 | 10 | 1  | 77.84  | 3.76  |
| -2 | 10 | 1  | 80.47  | 4.21  |
| -2 | 10 | 1  | 75.21  | 4.19  |
| -2 | 10 | 1  | 70.64  | 4.14  |
| -2 | 10 | 1  | 70.33  | 3.09  |
| -2 | 10 | 1  | 81.04  | 4.01  |
| -2 | 10 | 2  | 495.30 | 10.05 |
| -2 | 10 | 2  | 477.38 | 10.92 |
| -2 | 10 | 2  | 538.94 | 10.82 |
| -2 | 10 | 2  | 495.33 | 9.96  |
| -2 | 10 | 2  | 548.98 | 11.21 |
| -2 | 10 | 2  | 478.21 | 10.37 |
| -2 | 10 | 2  | 517.76 | 11.00 |
| -2 | 10 | 2  | 506.48 | 10.77 |
| -2 | 10 | 2  | 512.70 | 8.91  |
| -2 | 10 | 2  | 525.43 | 10.72 |
| -2 | 10 | 3  | 61.03  | 3.32  |
| -2 | 10 | 3  | 52.11  | 3.43  |

## CIF 31

|    |    |     |        |      |
|----|----|-----|--------|------|
| -2 | 10 | 3   | 49.66  | 3.32 |
| -2 | 10 | 3   | 48.53  | 2.70 |
| -2 | 10 | 3   | 47.23  | 2.83 |
| -2 | 10 | 3   | 50.31  | 3.21 |
| -2 | 10 | 3   | 55.14  | 3.35 |
| -2 | 10 | 3   | 58.72  | 3.57 |
| -2 | 10 | 3   | 58.91  | 3.44 |
| -2 | 10 | 4   | 0.10   | 1.15 |
| -2 | 10 | 4   | 0.36   | 1.14 |
| -2 | 10 | 4   | -0.35  | 1.00 |
| -2 | 10 | 4   | 0.24   | 0.80 |
| -2 | 10 | 4   | 1.55   | 1.14 |
| -2 | 10 | 4   | 0.52   | 0.94 |
| -2 | 10 | 4   | 0.88   | 1.26 |
| -2 | 10 | 4   | 0.26   | 1.06 |
| -2 | 10 | 5   | 181.44 | 5.33 |
| -2 | 10 | 5   | 166.62 | 4.93 |
| -2 | 10 | 5   | 186.75 | 5.21 |
| -2 | 10 | 5   | 176.44 | 5.30 |
| -2 | 10 | 5   | 176.63 | 5.24 |
| -2 | 10 | 5   | 173.32 | 5.28 |
| -2 | 10 | 6   | 221.17 | 5.13 |
| -2 | 10 | 6   | 227.61 | 5.28 |
| -2 | 10 | 6   | 211.47 | 5.00 |
| -2 | 10 | 6   | 216.11 | 5.34 |
| -2 | 10 | 6   | 234.71 | 5.43 |
| -2 | 10 | 7   | 59.44  | 2.19 |
| -2 | 10 | 7   | 93.70  | 2.62 |
| -2 | 11 | -11 | 22.19  | 1.08 |
| -2 | 11 | -11 | 23.53  | 1.18 |
| -2 | 11 | -10 | 13.17  | 1.49 |
| -2 | 11 | -10 | 12.25  | 1.44 |
| -2 | 11 | -10 | 10.45  | 0.99 |
| -2 | 11 | -9  | 2.62   | 1.23 |
| -2 | 11 | -9  | 2.41   | 0.88 |
| -2 | 11 | -9  | 2.40   | 1.16 |
| -2 | 11 | -9  | 2.67   | 0.80 |
| -2 | 11 | -8  | 14.43  | 1.69 |
| -2 | 11 | -8  | 14.99  | 2.09 |
| -2 | 11 | -8  | 12.44  | 1.50 |
| -2 | 11 | -8  | 16.09  | 2.13 |

## CIF 31

|    |    |    |        |      |
|----|----|----|--------|------|
| -2 | 11 | -7 | 73.67  | 3.77 |
| -2 | 11 | -7 | 70.71  | 3.16 |
| -2 | 11 | -7 | 67.10  | 3.48 |
| -2 | 11 | -7 | 62.13  | 3.52 |
| -2 | 11 | -6 | 425.74 | 9.52 |
| -2 | 11 | -6 | 417.52 | 9.46 |
| -2 | 11 | -5 | 99.85  | 3.83 |
| -2 | 11 | -5 | 107.42 | 4.91 |
| -2 | 11 | -5 | 110.78 | 4.93 |
| -2 | 11 | -5 | 100.77 | 4.50 |
| -2 | 11 | -5 | 103.55 | 4.10 |
| -2 | 11 | -4 | 127.06 | 4.42 |
| -2 | 11 | -4 | 120.99 | 4.57 |
| -2 | 11 | -4 | 123.97 | 5.31 |
| -2 | 11 | -4 | 123.58 | 5.38 |
| -2 | 11 | -4 | 115.07 | 4.69 |
| -2 | 11 | -4 | 116.80 | 4.65 |
| -2 | 11 | -3 | 19.62  | 2.53 |
| -2 | 11 | -3 | 21.25  | 1.89 |
| -2 | 11 | -3 | 22.38  | 2.35 |
| -2 | 11 | -3 | 19.02  | 1.79 |
| -2 | 11 | -3 | 20.31  | 2.02 |
| -2 | 11 | -3 | 20.20  | 2.13 |
| -2 | 11 | -2 | 1.93   | 1.34 |
| -2 | 11 | -2 | 0.98   | 1.37 |
| -2 | 11 | -2 | 1.82   | 0.91 |
| -2 | 11 | -2 | 2.04   | 1.49 |
| -2 | 11 | -2 | 1.67   | 1.07 |
| -2 | 11 | -2 | 1.22   | 0.93 |
| -2 | 11 | -2 | 0.92   | 1.02 |
| -2 | 11 | -2 | 1.45   | 1.10 |
| -2 | 11 | -1 | 20.11  | 2.29 |
| -2 | 11 | -1 | 17.79  | 2.31 |
| -2 | 11 | -1 | 19.71  | 2.03 |
| -2 | 11 | -1 | 19.04  | 2.07 |
| -2 | 11 | -1 | 16.70  | 2.08 |
| -2 | 11 | -1 | 20.50  | 1.98 |
| -2 | 11 | 0  | 186.58 | 5.79 |
| -2 | 11 | 0  | 172.85 | 5.76 |
| -2 | 11 | 0  | 169.60 | 5.96 |
| -2 | 11 | 0  | 171.79 | 5.72 |



## CIF 31

|    |    |    |        |      |
|----|----|----|--------|------|
| -2 | 11 | 0  | 171.81 | 6.05 |
| -2 | 11 | 0  | 169.15 | 5.63 |
| -2 | 11 | 0  | 160.23 | 5.73 |
| -2 | 11 | 0  | 180.32 | 5.51 |
| -2 | 11 | 1  | 60.27  | 3.34 |
| -2 | 11 | 1  | 53.76  | 3.09 |
| -2 | 11 | 1  | 53.03  | 3.19 |
| -2 | 11 | 1  | 54.94  | 3.22 |
| -2 | 11 | 1  | 57.47  | 3.28 |
| -2 | 11 | 1  | 53.09  | 3.23 |
| -2 | 11 | 1  | 57.61  | 3.18 |
| -2 | 11 | 1  | 55.80  | 2.97 |
| -2 | 11 | 2  | 6.96   | 1.33 |
| -2 | 11 | 2  | 5.77   | 1.11 |
| -2 | 11 | 2  | 5.19   | 1.21 |
| -2 | 11 | 2  | 6.26   | 1.15 |
| -2 | 11 | 2  | 5.46   | 1.48 |
| -2 | 11 | 2  | 6.24   | 1.33 |
| -2 | 11 | 2  | 7.77   | 1.47 |
| -2 | 11 | 2  | 6.09   | 1.28 |
| -2 | 11 | 2  | 7.22   | 1.52 |
| -2 | 11 | 2  | 6.14   | 1.27 |
| -2 | 11 | 3  | 7.61   | 1.43 |
| -2 | 11 | 3  | 5.42   | 1.34 |
| -2 | 11 | 3  | 6.67   | 1.16 |
| -2 | 11 | 3  | 8.28   | 1.23 |
| -2 | 11 | 3  | 6.10   | 1.23 |
| -2 | 11 | 3  | 7.21   | 1.42 |
| -2 | 11 | 4  | 27.75  | 1.90 |
| -2 | 11 | 4  | 30.50  | 2.07 |
| -2 | 11 | 5  | 2.63   | 0.72 |
| -2 | 12 | -9 | 10.08  | 1.22 |
| -2 | 12 | -9 | 8.41   | 1.13 |
| -2 | 12 | -9 | 8.95   | 0.81 |
| -2 | 12 | -8 | 18.98  | 1.79 |
| -2 | 12 | -8 | 18.89  | 1.47 |
| -2 | 12 | -8 | 19.66  | 1.81 |
| -2 | 12 | -8 | 20.78  | 1.29 |
| -2 | 12 | -7 | 45.84  | 2.55 |
| -2 | 12 | -7 | 44.86  | 2.44 |
| -2 | 12 | -7 | 41.42  | 2.65 |

## CIF 31

|    |    |    |        |       |
|----|----|----|--------|-------|
| -2 | 12 | -6 | 14.17  | 1.83  |
| -2 | 12 | -6 | 13.36  | 1.75  |
| -2 | 12 | -6 | 13.96  | 1.44  |
| -2 | 12 | -6 | 15.00  | 1.77  |
| -2 | 12 | -6 | 15.27  | 1.79  |
| -2 | 12 | -5 | 552.67 | 10.13 |
| -2 | 12 | -5 | 538.35 | 10.02 |
| -2 | 12 | -5 | 543.38 | 10.16 |
| -2 | 12 | -5 | 551.74 | 10.26 |
| -2 | 12 | -4 | 1.28   | 0.89  |
| -2 | 12 | -4 | 1.02   | 1.00  |
| -2 | 12 | -4 | 0.98   | 1.03  |
| -2 | 12 | -4 | -0.40  | 1.31  |
| -2 | 12 | -3 | 200.92 | 5.36  |
| -2 | 12 | -3 | 205.47 | 5.95  |
| -2 | 12 | -3 | 189.15 | 5.32  |
| -2 | 12 | -3 | 185.44 | 5.34  |
| -2 | 12 | -3 | 207.07 | 5.58  |
| -2 | 12 | -2 | 1.78   | 1.12  |
| -2 | 12 | -2 | 1.39   | 0.79  |
| -2 | 12 | -2 | 2.79   | 1.22  |
| -2 | 12 | -2 | 1.88   | 0.82  |
| -2 | 12 | -2 | 1.33   | 1.24  |
| -2 | 12 | -2 | 2.41   | 0.98  |
| -2 | 12 | -1 | 218.21 | 5.14  |
| -2 | 12 | -1 | 207.26 | 5.64  |
| -2 | 12 | -1 | 211.08 | 5.63  |
| -2 | 12 | -1 | 195.45 | 5.63  |
| -2 | 12 | -1 | 202.47 | 5.57  |
| -2 | 12 | 0  | 1.95   | 1.09  |
| -2 | 12 | 0  | 1.60   | 0.89  |
| -2 | 12 | 0  | 2.42   | 1.04  |
| -2 | 12 | 0  | 3.07   | 0.95  |
| -2 | 12 | 0  | 2.81   | 0.91  |
| -2 | 12 | 1  | 5.32   | 0.84  |
| -2 | 12 | 1  | 5.75   | 0.96  |
| -2 | 12 | 1  | 7.43   | 1.14  |
| -2 | 12 | 1  | 7.79   | 1.13  |
| -2 | 12 | 2  | -0.03  | 0.70  |
| -2 | 12 | 2  | 0.41   | 0.64  |
| -2 | 12 | 2  | -0.42  | 0.70  |

## CIF 31

|    |     |    |        |      |
|----|-----|----|--------|------|
| -2 | 12  | 3  | 88.21  | 2.51 |
| -2 | 12  | 3  | 105.20 | 2.70 |
| -2 | 13  | -6 | 16.33  | 1.21 |
| -2 | 13  | -6 | 21.06  | 1.35 |
| -2 | 13  | -6 | 16.85  | 1.21 |
| -2 | 13  | -6 | 21.35  | 1.34 |
| -2 | 13  | -5 | 12.31  | 1.21 |
| -2 | 13  | -5 | 14.73  | 1.34 |
| -2 | 13  | -4 | 41.86  | 1.90 |
| -2 | 13  | -4 | 40.81  | 2.15 |
| -2 | 13  | -3 | 48.17  | 2.14 |
| -2 | 13  | -3 | 47.09  | 2.28 |
| -2 | 13  | -2 | 67.17  | 2.19 |
| -2 | 13  | -2 | 70.46  | 2.56 |
| -1 | -12 | 3  | 215.65 | 3.25 |
| -1 | -12 | 3  | 173.47 | 3.01 |
| -1 | -12 | 4  | 23.88  | 1.13 |
| -1 | -12 | 4  | 24.37  | 1.12 |
| -1 | -12 | 5  | 21.43  | 1.05 |
| -1 | -12 | 6  | 26.63  | 1.09 |
| -1 | -12 | 6  | 29.86  | 1.17 |
| -1 | -12 | 7  | 158.39 | 2.55 |
| -1 | -11 | -2 | 27.39  | 0.99 |
| -1 | -11 | -1 | 17.40  | 1.06 |
| -1 | -11 | 0  | 21.24  | 1.03 |
| -1 | -11 | 0  | 21.98  | 1.13 |
| -1 | -11 | 1  | 263.84 | 4.93 |
| -1 | -11 | 1  | 254.65 | 4.42 |
| -1 | -11 | 2  | 27.34  | 1.52 |
| -1 | -11 | 2  | 17.33  | 1.29 |
| -1 | -11 | 3  | 234.78 | 4.60 |
| -1 | -11 | 3  | 184.09 | 4.77 |
| -1 | -11 | 4  | 31.55  | 1.75 |
| -1 | -11 | 4  | 33.45  | 1.77 |
| -1 | -11 | 4  | 29.80  | 1.94 |
| -1 | -11 | 5  | 160.62 | 4.39 |
| -1 | -11 | 5  | 166.15 | 3.96 |
| -1 | -11 | 5  | 172.40 | 4.62 |
| -1 | -11 | 6  | 39.91  | 1.93 |
| -1 | -11 | 6  | 41.60  | 1.90 |
| -1 | -11 | 6  | 41.96  | 2.23 |

## CIF 31

|    |     |    |        |      |
|----|-----|----|--------|------|
| -1 | -11 | 6  | 42.33  | 2.32 |
| -1 | -11 | 7  | 1.13   | 0.63 |
| -1 | -11 | 7  | 1.55   | 0.71 |
| -1 | -11 | 7  | 1.06   | 0.65 |
| -1 | -11 | 7  | 1.08   | 0.70 |
| -1 | -11 | 7  | 1.14   | 0.85 |
| -1 | -11 | 8  | 16.71  | 1.25 |
| -1 | -11 | 8  | 14.53  | 1.12 |
| -1 | -11 | 9  | 29.81  | 1.44 |
| -1 | -11 | 10 | 23.20  | 1.13 |
| -1 | -10 | -4 | 2.27   | 0.36 |
| -1 | -10 | -3 | 1.28   | 0.63 |
| -1 | -10 | -3 | 0.58   | 0.39 |
| -1 | -10 | -2 | 44.27  | 1.53 |
| -1 | -10 | -2 | 37.30  | 1.78 |
| -1 | -10 | -1 | 54.02  | 2.41 |
| -1 | -10 | -1 | 49.42  | 1.86 |
| -1 | -10 | -1 | 52.04  | 2.31 |
| -1 | -10 | -1 | 50.90  | 2.02 |
| -1 | -10 | 0  | 4.92   | 1.13 |
| -1 | -10 | 0  | 4.97   | 0.89 |
| -1 | -10 | 0  | 3.14   | 0.90 |
| -1 | -10 | 1  | 49.80  | 2.28 |
| -1 | -10 | 1  | 47.05  | 2.70 |
| -1 | -10 | 2  | 157.90 | 4.98 |
| -1 | -10 | 2  | 165.54 | 4.53 |
| -1 | -10 | 3  | 339.37 | 6.67 |
| -1 | -10 | 3  | 318.91 | 6.59 |
| -1 | -10 | 3  | 314.00 | 7.17 |
| -1 | -10 | 3  | 329.09 | 7.53 |
| -1 | -10 | 4  | 380.09 | 7.72 |
| -1 | -10 | 4  | 355.68 | 7.81 |
| -1 | -10 | 4  | 370.77 | 7.29 |
| -1 | -10 | 4  | 361.86 | 7.83 |
| -1 | -10 | 4  | 374.57 | 7.67 |
| -1 | -10 | 5  | 216.18 | 5.59 |
| -1 | -10 | 5  | 210.87 | 5.78 |
| -1 | -10 | 5  | 212.03 | 5.10 |
| -1 | -10 | 5  | 223.58 | 5.49 |
| -1 | -10 | 5  | 206.29 | 5.75 |
| -1 | -10 | 5  | 205.56 | 5.62 |

## CIF 31

|    |     |    |        |      |
|----|-----|----|--------|------|
| -1 | -10 | 6  | 429.62 | 7.81 |
| -1 | -10 | 6  | 539.52 | 8.30 |
| -1 | -10 | 6  | 434.83 | 8.13 |
| -1 | -10 | 6  | 474.99 | 8.86 |
| -1 | -10 | 6  | 530.23 | 9.38 |
| -1 | -10 | 6  | 442.05 | 8.17 |
| -1 | -10 | 6  | 437.75 | 8.79 |
| -1 | -10 | 6  | 459.44 | 7.41 |
| -1 | -10 | 6  | 484.50 | 9.01 |
| -1 | -10 | 7  | 73.15  | 2.95 |
| -1 | -10 | 7  | 69.29  | 2.88 |
| -1 | -10 | 7  | 75.71  | 3.30 |
| -1 | -10 | 7  | 76.19  | 3.36 |
| -1 | -10 | 7  | 78.53  | 2.82 |
| -1 | -10 | 7  | 73.04  | 3.02 |
| -1 | -10 | 7  | 73.10  | 3.37 |
| -1 | -10 | 7  | 69.13  | 2.58 |
| -1 | -10 | 8  | 146.37 | 4.36 |
| -1 | -10 | 8  | 151.23 | 3.75 |
| -1 | -10 | 8  | 154.04 | 4.15 |
| -1 | -10 | 8  | 147.90 | 4.29 |
| -1 | -10 | 8  | 149.34 | 3.69 |
| -1 | -10 | 8  | 135.44 | 4.39 |
| -1 | -10 | 9  | 38.38  | 1.80 |
| -1 | -10 | 9  | 41.38  | 2.21 |
| -1 | -10 | 9  | 42.73  | 2.13 |
| -1 | -10 | 9  | 44.42  | 2.26 |
| -1 | -10 | 9  | 43.35  | 2.43 |
| -1 | -10 | 10 | 225.78 | 4.75 |
| -1 | -10 | 10 | 199.16 | 4.38 |
| -1 | -10 | 10 | 201.49 | 3.90 |
| -1 | -10 | 10 | 223.00 | 4.55 |
| -1 | -10 | 10 | 198.95 | 4.83 |
| -1 | -10 | 11 | 37.00  | 1.74 |
| -1 | -10 | 11 | 35.16  | 1.62 |
| -1 | -10 | 12 | 80.27  | 1.98 |
| -1 | -10 | 12 | 79.22  | 2.14 |
| -1 | -9  | -6 | 139.28 | 2.69 |
| -1 | -9  | -5 | 2.76   | 0.69 |
| -1 | -9  | -4 | 3.50   | 0.84 |
| -1 | -9  | -4 | 2.30   | 0.75 |

## CIF 31

|    |    |    |        |      |
|----|----|----|--------|------|
| -1 | -9 | -3 | 9.11   | 1.23 |
| -1 | -9 | -3 | 6.04   | 1.07 |
| -1 | -9 | -3 | 7.40   | 1.05 |
| -1 | -9 | -2 | 2.91   | 0.70 |
| -1 | -9 | -2 | 6.04   | 1.13 |
| -1 | -9 | -2 | 3.59   | 1.10 |
| -1 | -9 | -2 | 4.10   | 0.93 |
| -1 | -9 | -2 | 4.25   | 0.87 |
| -1 | -9 | -1 | 138.27 | 3.66 |
| -1 | -9 | -1 | 140.64 | 3.81 |
| -1 | -9 | 0  | 31.31  | 1.96 |
| -1 | -9 | 0  | 27.36  | 2.11 |
| -1 | -9 | 0  | 28.47  | 2.30 |
| -1 | -9 | 0  | 27.18  | 1.88 |
| -1 | -9 | 1  | 153.31 | 5.27 |
| -1 | -9 | 1  | 144.65 | 5.22 |
| -1 | -9 | 1  | 146.54 | 4.61 |
| -1 | -9 | 1  | 149.09 | 4.74 |
| -1 | -9 | 1  | 155.18 | 5.18 |
| -1 | -9 | 2  | 4.37   | 1.07 |
| -1 | -9 | 2  | 4.65   | 1.15 |
| -1 | -9 | 2  | 3.50   | 1.19 |
| -1 | -9 | 2  | 3.16   | 1.33 |
| -1 | -9 | 2  | 3.42   | 1.19 |
| -1 | -9 | 2  | 4.86   | 1.15 |
| -1 | -9 | 2  | 5.20   | 1.34 |
| -1 | -9 | 2  | 3.95   | 1.02 |
| -1 | -9 | 3  | 213.40 | 6.28 |
| -1 | -9 | 3  | 235.61 | 6.63 |
| -1 | -9 | 3  | 232.98 | 5.93 |
| -1 | -9 | 3  | 215.96 | 6.28 |
| -1 | -9 | 3  | 252.57 | 5.94 |
| -1 | -9 | 3  | 229.20 | 5.75 |
| -1 | -9 | 3  | 226.94 | 6.31 |
| -1 | -9 | 3  | 256.92 | 6.81 |
| -1 | -9 | 3  | 243.58 | 6.27 |
| -1 | -9 | 4  | 2.94   | 1.08 |
| -1 | -9 | 4  | 3.02   | 1.25 |
| -1 | -9 | 4  | 3.67   | 1.20 |
| -1 | -9 | 4  | 3.88   | 1.28 |
| -1 | -9 | 4  | 3.18   | 0.88 |

## CIF 31

|    |    |   |        |      |
|----|----|---|--------|------|
| -1 | -9 | 4 | 3.78   | 1.16 |
| -1 | -9 | 4 | 1.93   | 1.13 |
| -1 | -9 | 4 | 2.50   | 1.28 |
| -1 | -9 | 4 | 2.45   | 0.82 |
| -1 | -9 | 5 | 4.22   | 1.16 |
| -1 | -9 | 5 | 3.45   | 1.16 |
| -1 | -9 | 5 | 4.84   | 1.35 |
| -1 | -9 | 5 | 5.09   | 1.27 |
| -1 | -9 | 5 | 6.75   | 1.24 |
| -1 | -9 | 5 | 4.74   | 1.37 |
| -1 | -9 | 5 | 4.61   | 1.04 |
| -1 | -9 | 5 | 5.53   | 1.26 |
| -1 | -9 | 5 | 5.81   | 1.37 |
| -1 | -9 | 5 | 6.00   | 1.41 |
| -1 | -9 | 5 | 5.54   | 1.05 |
| -1 | -9 | 6 | 278.49 | 6.77 |
| -1 | -9 | 6 | 322.20 | 7.71 |
| -1 | -9 | 6 | 315.86 | 6.51 |
| -1 | -9 | 6 | 297.73 | 7.50 |
| -1 | -9 | 6 | 330.31 | 6.96 |
| -1 | -9 | 6 | 349.80 | 6.86 |
| -1 | -9 | 6 | 323.48 | 7.16 |
| -1 | -9 | 6 | 289.43 | 7.31 |
| -1 | -9 | 6 | 336.50 | 6.97 |
| -1 | -9 | 6 | 328.96 | 7.69 |
| -1 | -9 | 7 | 170.35 | 4.66 |
| -1 | -9 | 7 | 162.66 | 4.85 |
| -1 | -9 | 7 | 162.56 | 4.87 |
| -1 | -9 | 7 | 170.64 | 5.45 |
| -1 | -9 | 7 | 160.90 | 4.41 |
| -1 | -9 | 7 | 168.07 | 5.12 |
| -1 | -9 | 7 | 176.03 | 5.45 |
| -1 | -9 | 7 | 178.24 | 5.51 |
| -1 | -9 | 7 | 175.37 | 5.04 |
| -1 | -9 | 8 | 14.67  | 1.61 |
| -1 | -9 | 8 | 12.10  | 1.74 |
| -1 | -9 | 8 | 15.77  | 1.54 |
| -1 | -9 | 8 | 12.97  | 1.63 |
| -1 | -9 | 8 | 14.05  | 1.78 |
| -1 | -9 | 8 | 17.14  | 1.69 |
| -1 | -9 | 8 | 17.23  | 1.43 |

## CIF 31

|    |    |    |        |      |
|----|----|----|--------|------|
| -1 | -9 | 8  | 15.68  | 1.68 |
| -1 | -9 | 9  | 108.22 | 3.56 |
| -1 | -9 | 9  | 114.12 | 3.80 |
| -1 | -9 | 9  | 112.98 | 4.06 |
| -1 | -9 | 9  | 119.56 | 4.33 |
| -1 | -9 | 9  | 111.09 | 4.10 |
| -1 | -9 | 9  | 113.84 | 4.04 |
| -1 | -9 | 9  | 116.76 | 4.16 |
| -1 | -9 | 10 | 4.12   | 1.01 |
| -1 | -9 | 10 | 5.72   | 1.22 |
| -1 | -9 | 10 | 6.84   | 1.25 |
| -1 | -9 | 10 | 4.15   | 1.12 |
| -1 | -9 | 10 | 4.28   | 0.96 |
| -1 | -9 | 10 | 5.22   | 1.08 |
| -1 | -9 | 11 | 12.21  | 1.37 |
| -1 | -9 | 11 | 12.92  | 1.36 |
| -1 | -9 | 11 | 11.46  | 1.16 |
| -1 | -9 | 11 | 12.26  | 1.31 |
| -1 | -9 | 11 | 11.27  | 1.38 |
| -1 | -9 | 12 | 10.75  | 1.05 |
| -1 | -9 | 12 | 9.67   | 0.95 |
| -1 | -9 | 12 | 11.91  | 1.12 |
| -1 | -9 | 12 | 11.37  | 1.20 |
| -1 | -9 | 12 | 10.04  | 1.18 |
| -1 | -9 | 13 | 6.05   | 0.71 |
| -1 | -9 | 13 | 4.24   | 0.51 |
| -1 | -9 | 13 | 5.67   | 0.80 |
| -1 | -9 | 13 | 6.41   | 0.88 |
| -1 | -8 | -7 | 186.04 | 3.76 |
| -1 | -8 | -7 | 186.77 | 3.18 |
| -1 | -8 | -6 | 1.96   | 0.80 |
| -1 | -8 | -6 | 1.43   | 0.83 |
| -1 | -8 | -6 | 1.00   | 0.54 |
| -1 | -8 | -5 | 54.60  | 2.31 |
| -1 | -8 | -5 | 54.41  | 2.45 |
| -1 | -8 | -5 | 49.79  | 2.02 |
| -1 | -8 | -4 | 92.59  | 3.32 |
| -1 | -8 | -4 | 87.87  | 2.79 |
| -1 | -8 | -4 | 92.30  | 3.67 |
| -1 | -8 | -3 | 8.97   | 1.36 |
| -1 | -8 | -3 | 6.33   | 1.18 |



|    |    |    |         |       |
|----|----|----|---------|-------|
| -1 | -8 | -3 | 6.19    | 0.92  |
| -1 | -8 | -3 | 9.49    | 1.24  |
| -1 | -8 | -3 | 7.23    | 1.23  |
| -1 | -8 | -3 | 8.75    | 1.43  |
| -1 | -8 | -3 | 7.62    | 1.10  |
| -1 | -8 | -2 | 353.94  | 6.86  |
| -1 | -8 | -2 | 338.15  | 6.28  |
| -1 | -8 | -2 | 335.85  | 7.57  |
| -1 | -8 | -1 | 87.05   | 3.13  |
| -1 | -8 | -1 | 70.78   | 3.10  |
| -1 | -8 | -1 | 95.54   | 3.28  |
| -1 | -8 | -1 | 65.94   | 3.44  |
| -1 | -8 | 0  | 1909.78 | 20.47 |
| -1 | -8 | 0  | 2032.59 | 24.50 |
| -1 | -8 | 0  | 1907.17 | 22.73 |
| -1 | -8 | 0  | 1914.24 | 21.46 |
| -1 | -8 | 0  | 2004.24 | 22.55 |
| -1 | -8 | 0  | 1932.45 | 23.49 |
| -1 | -8 | 0  | 2008.87 | 23.90 |
| -1 | -8 | 1  | 1.21    | 0.80  |
| -1 | -8 | 1  | 0.65    | 0.82  |
| -1 | -8 | 1  | 2.69    | 1.32  |
| -1 | -8 | 1  | 3.20    | 1.27  |
| -1 | -8 | 1  | 3.68    | 1.41  |
| -1 | -8 | 1  | 2.95    | 1.07  |
| -1 | -8 | 1  | 2.69    | 1.21  |
| -1 | -8 | 1  | 3.69    | 1.28  |
| -1 | -8 | 1  | 0.75    | 0.81  |
| -1 | -8 | 2  | 982.81  | 15.04 |
| -1 | -8 | 2  | 1075.84 | 15.49 |
| -1 | -8 | 2  | 1068.88 | 15.67 |
| -1 | -8 | 2  | 1000.64 | 13.43 |
| -1 | -8 | 2  | 1005.66 | 13.96 |
| -1 | -8 | 2  | 1022.10 | 14.76 |
| -1 | -8 | 2  | 866.82  | 13.21 |
| -1 | -8 | 2  | 1012.57 | 14.91 |
| -1 | -8 | 2  | 929.36  | 13.88 |
| -1 | -8 | 3  | 15.93   | 1.91  |
| -1 | -8 | 3  | 15.51   | 1.88  |
| -1 | -8 | 3  | 16.62   | 1.94  |
| -1 | -8 | 3  | 18.26   | 1.58  |

## CIF 31

|    |    |   |        |      |
|----|----|---|--------|------|
| -1 | -8 | 3 | 22.67  | 1.84 |
| -1 | -8 | 3 | 22.53  | 1.80 |
| -1 | -8 | 3 | 19.70  | 1.86 |
| -1 | -8 | 3 | 18.58  | 1.88 |
| -1 | -8 | 3 | 19.22  | 1.98 |
| -1 | -8 | 3 | 21.86  | 1.97 |
| -1 | -8 | 4 | 448.25 | 8.87 |
| -1 | -8 | 4 | 418.61 | 8.78 |
| -1 | -8 | 4 | 410.84 | 8.86 |
| -1 | -8 | 4 | 419.06 | 7.59 |
| -1 | -8 | 4 | 404.00 | 7.94 |
| -1 | -8 | 4 | 419.93 | 8.18 |
| -1 | -8 | 4 | 355.45 | 7.34 |
| -1 | -8 | 4 | 428.92 | 8.80 |
| -1 | -8 | 4 | 400.04 | 7.59 |
| -1 | -8 | 4 | 425.16 | 7.62 |
| -1 | -8 | 4 | 456.83 | 8.91 |
| -1 | -8 | 5 | 442.88 | 8.43 |
| -1 | -8 | 5 | 440.88 | 8.98 |
| -1 | -8 | 5 | 485.92 | 9.75 |
| -1 | -8 | 5 | 445.45 | 8.03 |
| -1 | -8 | 5 | 440.54 | 8.07 |
| -1 | -8 | 5 | 423.01 | 9.04 |
| -1 | -8 | 5 | 454.00 | 8.63 |
| -1 | -8 | 5 | 449.49 | 9.06 |
| -1 | -8 | 5 | 463.43 | 9.16 |
| -1 | -8 | 5 | 458.41 | 8.33 |
| -1 | -8 | 5 | 465.78 | 9.15 |
| -1 | -8 | 6 | 8.98   | 1.43 |
| -1 | -8 | 6 | 12.04  | 1.83 |
| -1 | -8 | 6 | 11.72  | 1.44 |
| -1 | -8 | 6 | 13.92  | 1.46 |
| -1 | -8 | 6 | 10.76  | 1.55 |
| -1 | -8 | 6 | 11.05  | 1.58 |
| -1 | -8 | 6 | 10.95  | 1.68 |
| -1 | -8 | 6 | 10.03  | 1.62 |
| -1 | -8 | 6 | 13.92  | 1.59 |
| -1 | -8 | 6 | 11.94  | 1.48 |
| -1 | -8 | 7 | 532.98 | 9.83 |
| -1 | -8 | 7 | 587.00 | 9.94 |
| -1 | -8 | 7 | 596.49 | 9.30 |

## CIF 31

|    |    |    |        |       |
|----|----|----|--------|-------|
| -1 | -8 | 7  | 599.91 | 10.24 |
| -1 | -8 | 7  | 538.17 | 10.43 |
| -1 | -8 | 7  | 512.51 | 10.24 |
| -1 | -8 | 7  | 536.75 | 9.32  |
| -1 | -8 | 7  | 631.49 | 10.54 |
| -1 | -8 | 7  | 603.11 | 10.88 |
| -1 | -8 | 8  | 3.88   | 1.15  |
| -1 | -8 | 8  | 3.51   | 1.15  |
| -1 | -8 | 8  | 3.93   | 1.23  |
| -1 | -8 | 8  | 3.92   | 1.19  |
| -1 | -8 | 8  | 2.42   | 1.00  |
| -1 | -8 | 8  | 6.37   | 1.02  |
| -1 | -8 | 8  | 5.60   | 1.35  |
| -1 | -8 | 8  | 3.64   | 1.44  |
| -1 | -8 | 8  | 3.26   | 1.00  |
| -1 | -8 | 8  | 6.04   | 1.32  |
| -1 | -8 | 9  | 6.09   | 1.23  |
| -1 | -8 | 9  | 6.07   | 1.33  |
| -1 | -8 | 9  | 5.98   | 1.40  |
| -1 | -8 | 9  | 4.43   | 0.80  |
| -1 | -8 | 9  | 4.95   | 0.98  |
| -1 | -8 | 9  | 5.78   | 1.34  |
| -1 | -8 | 9  | 6.04   | 1.13  |
| -1 | -8 | 9  | 6.56   | 1.29  |
| -1 | -8 | 10 | 62.16  | 3.02  |
| -1 | -8 | 10 | 69.32  | 3.19  |
| -1 | -8 | 10 | 60.52  | 3.18  |
| -1 | -8 | 10 | 64.21  | 3.19  |
| -1 | -8 | 10 | 61.63  | 2.96  |
| -1 | -8 | 11 | 180.77 | 4.92  |
| -1 | -8 | 11 | 177.74 | 4.74  |
| -1 | -8 | 11 | 177.36 | 4.71  |
| -1 | -8 | 12 | 31.00  | 1.91  |
| -1 | -8 | 12 | 33.32  | 1.94  |
| -1 | -8 | 12 | 28.25  | 2.02  |
| -1 | -8 | 13 | 2.50   | 0.78  |
| -1 | -8 | 14 | 163.59 | 3.24  |
| -1 | -8 | 14 | 169.36 | 3.58  |
| -1 | -8 | 14 | 172.79 | 3.54  |
| -1 | -7 | -9 | 50.92  | 1.48  |
| -1 | -7 | -9 | 47.96  | 1.75  |

## CIF 31

|    |    |    |         |       |
|----|----|----|---------|-------|
| -1 | -7 | -8 | 37.05   | 1.91  |
| -1 | -7 | -8 | 43.39   | 1.92  |
| -1 | -7 | -8 | 35.05   | 2.05  |
| -1 | -7 | -8 | 46.13   | 1.82  |
| -1 | -7 | -7 | 16.12   | 1.65  |
| -1 | -7 | -7 | 18.21   | 1.39  |
| -1 | -7 | -6 | 1.69    | 1.06  |
| -1 | -7 | -6 | 1.43    | 0.76  |
| -1 | -7 | -6 | 0.98    | 0.74  |
| -1 | -7 | -5 | 50.77   | 2.53  |
| -1 | -7 | -5 | 49.78   | 2.90  |
| -1 | -7 | -5 | 50.37   | 2.41  |
| -1 | -7 | -5 | 53.39   | 2.72  |
| -1 | -7 | -5 | 45.46   | 2.74  |
| -1 | -7 | -5 | 43.50   | 2.49  |
| -1 | -7 | -4 | 375.23  | 7.35  |
| -1 | -7 | -4 | 403.49  | 8.39  |
| -1 | -7 | -4 | 357.88  | 6.78  |
| -1 | -7 | -4 | 387.62  | 8.31  |
| -1 | -7 | -4 | 343.10  | 7.21  |
| -1 | -7 | -4 | 381.34  | 7.47  |
| -1 | -7 | -4 | 361.88  | 7.65  |
| -1 | -7 | -4 | 369.04  | 6.51  |
| -1 | -7 | -3 | 9.48    | 1.49  |
| -1 | -7 | -3 | 6.81    | 1.26  |
| -1 | -7 | -3 | 7.14    | 1.30  |
| -1 | -7 | -3 | 7.86    | 1.13  |
| -1 | -7 | -3 | 9.99    | 1.47  |
| -1 | -7 | -3 | 10.72   | 1.40  |
| -1 | -7 | -2 | 1335.74 | 16.15 |
| -1 | -7 | -2 | 1229.85 | 14.49 |
| -1 | -7 | -2 | 1272.64 | 15.35 |
| -1 | -7 | -2 | 1174.28 | 16.70 |
| -1 | -7 | -2 | 1273.93 | 16.30 |
| -1 | -7 | -1 | 29.28   | 1.91  |
| -1 | -7 | -1 | 41.75   | 2.85  |
| -1 | -7 | -1 | 41.44   | 2.66  |
| -1 | -7 | -1 | 26.61   | 1.79  |
| -1 | -7 | -1 | 40.75   | 2.38  |
| -1 | -7 | 0  | 62.53   | 2.71  |
| -1 | -7 | 0  | 76.19   | 3.69  |

## CIF 31

|    |    |   |         |       |
|----|----|---|---------|-------|
| -1 | -7 | 0 | 77.20   | 3.76  |
| -1 | -7 | 0 | 74.66   | 3.71  |
| -1 | -7 | 0 | 62.89   | 2.50  |
| -1 | -7 | 0 | 79.15   | 3.26  |
| -1 | -7 | 0 | 73.48   | 3.41  |
| -1 | -7 | 0 | 65.99   | 3.01  |
| -1 | -7 | 0 | 84.10   | 3.65  |
| -1 | -7 | 0 | 67.17   | 2.90  |
| -1 | -7 | 1 | 311.19  | 7.48  |
| -1 | -7 | 1 | 321.48  | 7.52  |
| -1 | -7 | 1 | 318.47  | 7.60  |
| -1 | -7 | 1 | 313.29  | 6.32  |
| -1 | -7 | 1 | 333.21  | 6.76  |
| -1 | -7 | 1 | 336.19  | 7.25  |
| -1 | -7 | 1 | 315.08  | 6.66  |
| -1 | -7 | 1 | 342.70  | 7.40  |
| -1 | -7 | 1 | 328.35  | 6.81  |
| -1 | -7 | 2 | 455.07  | 7.93  |
| -1 | -7 | 2 | 455.17  | 8.94  |
| -1 | -7 | 2 | 438.19  | 8.87  |
| -1 | -7 | 2 | 428.53  | 8.91  |
| -1 | -7 | 2 | 416.81  | 7.55  |
| -1 | -7 | 2 | 439.13  | 8.73  |
| -1 | -7 | 2 | 445.98  | 8.07  |
| -1 | -7 | 2 | 449.72  | 7.54  |
| -1 | -7 | 2 | 455.13  | 8.01  |
| -1 | -7 | 2 | 435.38  | 8.51  |
| -1 | -7 | 2 | 429.03  | 6.97  |
| -1 | -7 | 2 | 452.10  | 8.37  |
| -1 | -7 | 3 | 2.33    | 1.09  |
| -1 | -7 | 3 | 3.29    | 1.11  |
| -1 | -7 | 3 | 5.45    | 1.13  |
| -1 | -7 | 3 | 3.63    | 1.26  |
| -1 | -7 | 3 | 3.58    | 1.04  |
| -1 | -7 | 3 | 5.80    | 1.01  |
| -1 | -7 | 3 | 4.50    | 1.28  |
| -1 | -7 | 3 | 4.66    | 1.18  |
| -1 | -7 | 3 | 2.95    | 0.86  |
| -1 | -7 | 3 | 5.23    | 0.95  |
| -1 | -7 | 3 | 6.44    | 1.25  |
| -1 | -7 | 4 | 3299.15 | 33.68 |

## CIF 31

|    |    |   |         |       |
|----|----|---|---------|-------|
| -1 | -7 | 4 | 3197.29 | 33.76 |
| -1 | -7 | 4 | 3357.07 | 31.85 |
| -1 | -7 | 4 | 3281.54 | 32.39 |
| -1 | -7 | 4 | 3048.15 | 31.72 |
| -1 | -7 | 4 | 3262.88 | 33.78 |
| -1 | -7 | 4 | 3246.30 | 32.66 |
| -1 | -7 | 4 | 3286.77 | 33.34 |
| -1 | -7 | 4 | 3157.41 | 31.50 |
| -1 | -7 | 4 | 3403.67 | 33.59 |
| -1 | -7 | 4 | 3030.79 | 32.39 |
| -1 | -7 | 4 | 3310.08 | 32.24 |
| -1 | -7 | 4 | 3356.90 | 33.48 |
| -1 | -7 | 5 | 51.56   | 2.84  |
| -1 | -7 | 5 | 53.59   | 2.66  |
| -1 | -7 | 5 | 48.53   | 2.19  |
| -1 | -7 | 5 | 38.54   | 2.15  |
| -1 | -7 | 5 | 42.33   | 2.66  |
| -1 | -7 | 5 | 50.93   | 2.85  |
| -1 | -7 | 5 | 43.85   | 2.14  |
| -1 | -7 | 5 | 50.47   | 2.86  |
| -1 | -7 | 5 | 52.64   | 2.74  |
| -1 | -7 | 5 | 50.24   | 2.68  |
| -1 | -7 | 5 | 46.57   | 2.54  |
| -1 | -7 | 5 | 52.56   | 2.68  |
| -1 | -7 | 6 | 812.50  | 11.41 |
| -1 | -7 | 6 | 784.53  | 12.15 |
| -1 | -7 | 6 | 791.05  | 10.98 |
| -1 | -7 | 6 | 763.99  | 12.34 |
| -1 | -7 | 6 | 841.97  | 12.52 |
| -1 | -7 | 6 | 755.65  | 10.95 |
| -1 | -7 | 6 | 800.41  | 12.44 |
| -1 | -7 | 6 | 815.67  | 12.64 |
| -1 | -7 | 6 | 787.84  | 11.95 |
| -1 | -7 | 6 | 814.23  | 11.90 |
| -1 | -7 | 6 | 907.75  | 12.98 |
| -1 | -7 | 6 | 855.50  | 12.75 |
| -1 | -7 | 7 | 776.11  | 12.24 |
| -1 | -7 | 7 | 790.38  | 11.67 |
| -1 | -7 | 7 | 731.95  | 11.74 |
| -1 | -7 | 7 | 782.21  | 12.42 |
| -1 | -7 | 7 | 767.17  | 10.72 |

## CIF 31

|    |    |    |         |       |
|----|----|----|---------|-------|
| -1 | -7 | 7  | 724.34  | 11.30 |
| -1 | -7 | 7  | 842.19  | 12.35 |
| -1 | -7 | 7  | 765.21  | 12.35 |
| -1 | -7 | 7  | 766.40  | 11.73 |
| -1 | -7 | 7  | 788.68  | 12.50 |
| -1 | -7 | 7  | 752.47  | 11.43 |
| -1 | -7 | 7  | 857.18  | 13.03 |
| -1 | -7 | 7  | 780.18  | 12.37 |
| -1 | -7 | 8  | 980.70  | 14.38 |
| -1 | -7 | 8  | 953.69  | 14.04 |
| -1 | -7 | 8  | 924.59  | 13.66 |
| -1 | -7 | 8  | 954.99  | 13.54 |
| -1 | -7 | 8  | 928.58  | 13.43 |
| -1 | -7 | 8  | 853.48  | 13.19 |
| -1 | -7 | 8  | 883.34  | 11.74 |
| -1 | -7 | 8  | 959.60  | 13.51 |
| -1 | -7 | 8  | 992.81  | 14.57 |
| -1 | -7 | 8  | 894.15  | 14.18 |
| -1 | -7 | 8  | 884.41  | 13.13 |
| -1 | -7 | 8  | 915.49  | 12.98 |
| -1 | -7 | 8  | 1112.63 | 15.21 |
| -1 | -7 | 8  | 1005.26 | 14.23 |
| -1 | -7 | 9  | 28.56   | 3.11  |
| -1 | -7 | 9  | 36.34   | 2.60  |
| -1 | -7 | 9  | 26.55   | 2.18  |
| -1 | -7 | 9  | 32.22   | 3.24  |
| -1 | -7 | 9  | 31.46   | 2.19  |
| -1 | -7 | 9  | 30.91   | 2.19  |
| -1 | -7 | 9  | 25.20   | 2.28  |
| -1 | -7 | 9  | 28.30   | 2.08  |
| -1 | -7 | 9  | 28.71   | 1.99  |
| -1 | -7 | 9  | 32.13   | 2.70  |
| -1 | -7 | 9  | 28.73   | 2.20  |
| -1 | -7 | 10 | 212.12  | 5.88  |
| -1 | -7 | 10 | 202.44  | 5.49  |
| -1 | -7 | 10 | 204.73  | 5.95  |
| -1 | -7 | 10 | 196.64  | 6.29  |
| -1 | -7 | 10 | 205.11  | 6.06  |
| -1 | -7 | 10 | 205.80  | 5.30  |
| -1 | -7 | 10 | 198.85  | 5.46  |
| -1 | -7 | 11 | 262.91  | 6.42  |

## CIF 31

|    |    |     |        |       |
|----|----|-----|--------|-------|
| -1 | -7 | 11  | 271.91 | 6.18  |
| -1 | -7 | 11  | 265.97 | 6.59  |
| -1 | -7 | 11  | 275.02 | 6.71  |
| -1 | -7 | 11  | 257.64 | 6.64  |
| -1 | -7 | 11  | 249.95 | 5.61  |
| -1 | -7 | 11  | 269.34 | 6.73  |
| -1 | -7 | 12  | 30.93  | 2.17  |
| -1 | -7 | 12  | 37.43  | 2.48  |
| -1 | -7 | 12  | 38.05  | 2.32  |
| -1 | -7 | 12  | 39.14  | 2.63  |
| -1 | -7 | 12  | 33.83  | 2.05  |
| -1 | -7 | 12  | 31.19  | 2.30  |
| -1 | -7 | 12  | 34.65  | 2.29  |
| -1 | -7 | 13  | 31.67  | 1.94  |
| -1 | -7 | 13  | 30.46  | 1.94  |
| -1 | -7 | 14  | 158.21 | 3.49  |
| -1 | -7 | 15  | 102.96 | 2.32  |
| -1 | -7 | 15  | 132.29 | 2.77  |
| -1 | -6 | -10 | 47.15  | 1.52  |
| -1 | -6 | -10 | 49.71  | 1.63  |
| -1 | -6 | -10 | 45.01  | 1.94  |
| -1 | -6 | -9  | 284.37 | 6.14  |
| -1 | -6 | -9  | 275.06 | 5.59  |
| -1 | -6 | -9  | 274.89 | 5.07  |
| -1 | -6 | -9  | 270.12 | 5.08  |
| -1 | -6 | -8  | 30.32  | 2.33  |
| -1 | -6 | -8  | 27.00  | 1.80  |
| -1 | -6 | -8  | 32.15  | 2.02  |
| -1 | -6 | -7  | 84.47  | 2.93  |
| -1 | -6 | -7  | 95.04  | 4.10  |
| -1 | -6 | -7  | 89.94  | 3.49  |
| -1 | -6 | -7  | 86.47  | 3.29  |
| -1 | -6 | -6  | 510.99 | 8.39  |
| -1 | -6 | -6  | 485.17 | 8.53  |
| -1 | -6 | -6  | 471.76 | 8.48  |
| -1 | -6 | -6  | 473.03 | 7.60  |
| -1 | -6 | -6  | 499.51 | 10.03 |
| -1 | -6 | -5  | 160.67 | 4.62  |
| -1 | -6 | -5  | 151.21 | 4.41  |
| -1 | -6 | -5  | 148.03 | 3.92  |
| -1 | -6 | -5  | 149.51 | 4.61  |



## CIF 31

|    |    |    |         |       |
|----|----|----|---------|-------|
| -1 | -6 | -4 | 511.90  | 9.64  |
| -1 | -6 | -4 | 510.23  | 8.67  |
| -1 | -6 | -4 | 451.67  | 8.00  |
| -1 | -6 | -4 | 514.87  | 9.09  |
| -1 | -6 | -4 | 466.30  | 7.49  |
| -1 | -6 | -4 | 482.31  | 8.58  |
| -1 | -6 | -4 | 478.33  | 8.70  |
| -1 | -6 | -4 | 488.41  | 8.44  |
| -1 | -6 | -4 | 477.95  | 7.69  |
| -1 | -6 | -3 | 217.04  | 5.84  |
| -1 | -6 | -3 | 137.75  | 3.98  |
| -1 | -6 | -3 | 204.32  | 5.23  |
| -1 | -6 | -3 | 150.34  | 4.38  |
| -1 | -6 | -3 | 155.03  | 4.60  |
| -1 | -6 | -3 | 156.01  | 4.49  |
| -1 | -6 | -2 | 4065.42 | 37.09 |
| -1 | -6 | -2 | 3955.95 | 39.98 |
| -1 | -6 | -2 | 4083.39 | 37.75 |
| -1 | -6 | -2 | 3929.50 | 37.54 |
| -1 | -6 | -2 | 4008.90 | 38.77 |
| -1 | -6 | -2 | 4152.18 | 38.07 |
| -1 | -6 | -2 | 3936.47 | 37.41 |
| -1 | -6 | -1 | 3.59    | 0.79  |
| -1 | -6 | -1 | 4.07    | 0.86  |
| -1 | -6 | -1 | 4.08    | 1.23  |
| -1 | -6 | -1 | 5.52    | 1.32  |
| -1 | -6 | -1 | 7.24    | 1.39  |
| -1 | -6 | -1 | 4.52    | 0.93  |
| -1 | -6 | -1 | 6.60    | 1.21  |
| -1 | -6 | -1 | 4.80    | 1.11  |
| -1 | -6 | -1 | 5.91    | 1.15  |
| -1 | -6 | -1 | 7.33    | 1.06  |
| -1 | -6 | -1 | 4.24    | 0.85  |
| -1 | -6 | 0  | 22.84   | 1.43  |
| -1 | -6 | 0  | 26.66   | 2.13  |
| -1 | -6 | 0  | 29.60   | 2.24  |
| -1 | -6 | 0  | 22.58   | 1.53  |
| -1 | -6 | 0  | 27.39   | 1.75  |
| -1 | -6 | 0  | 27.76   | 1.94  |
| -1 | -6 | 0  | 25.32   | 1.97  |
| -1 | -6 | 0  | 26.09   | 1.72  |

## CIF 31

|    |    |   |         |       |
|----|----|---|---------|-------|
| -1 | -6 | 1 | 11.98   | 1.48  |
| -1 | -6 | 1 | 12.31   | 1.47  |
| -1 | -6 | 1 | 12.96   | 1.53  |
| -1 | -6 | 1 | 12.74   | 1.14  |
| -1 | -6 | 1 | 13.28   | 1.45  |
| -1 | -6 | 1 | 13.31   | 1.20  |
| -1 | -6 | 1 | 11.51   | 1.21  |
| -1 | -6 | 1 | 13.66   | 1.36  |
| -1 | -6 | 1 | 13.03   | 1.43  |
| -1 | -6 | 1 | 13.29   | 1.42  |
| -1 | -6 | 1 | 14.38   | 1.07  |
| -1 | -6 | 1 | 12.95   | 1.35  |
| -1 | -6 | 2 | 845.53  | 10.82 |
| -1 | -6 | 2 | 781.42  | 11.73 |
| -1 | -6 | 2 | 785.94  | 11.68 |
| -1 | -6 | 2 | 790.99  | 11.97 |
| -1 | -6 | 2 | 785.49  | 10.29 |
| -1 | -6 | 2 | 801.86  | 11.66 |
| -1 | -6 | 2 | 754.49  | 10.38 |
| -1 | -6 | 2 | 826.75  | 10.91 |
| -1 | -6 | 2 | 849.96  | 11.57 |
| -1 | -6 | 2 | 813.19  | 10.75 |
| -1 | -6 | 2 | 755.10  | 11.28 |
| -1 | -6 | 2 | 829.40  | 10.24 |
| -1 | -6 | 2 | 795.09  | 11.25 |
| -1 | -6 | 3 | 1595.43 | 16.53 |
| -1 | -6 | 3 | 1474.85 | 18.42 |
| -1 | -6 | 3 | 1550.24 | 18.61 |
| -1 | -6 | 3 | 1579.28 | 17.23 |
| -1 | -6 | 3 | 1487.73 | 17.39 |
| -1 | -6 | 3 | 1719.33 | 18.74 |
| -1 | -6 | 3 | 1574.02 | 17.84 |
| -1 | -6 | 3 | 1809.30 | 18.95 |
| -1 | -6 | 3 | 1575.96 | 17.36 |
| -1 | -6 | 3 | 1589.66 | 18.32 |
| -1 | -6 | 3 | 1690.30 | 17.64 |
| -1 | -6 | 3 | 1677.79 | 18.64 |
| -1 | -6 | 4 | 521.97  | 8.75  |
| -1 | -6 | 4 | 536.97  | 7.51  |
| -1 | -6 | 4 | 511.81  | 8.67  |
| -1 | -6 | 4 | 432.20  | 7.98  |

## CIF 31

|    |    |   |        |      |
|----|----|---|--------|------|
| -1 | -6 | 4 | 463.19 | 7.62 |
| -1 | -6 | 4 | 421.79 | 8.00 |
| -1 | -6 | 4 | 506.13 | 7.31 |
| -1 | -6 | 4 | 508.87 | 7.99 |
| -1 | -6 | 4 | 519.38 | 8.77 |
| -1 | -6 | 4 | 503.59 | 8.47 |
| -1 | -6 | 4 | 499.74 | 7.55 |
| -1 | -6 | 4 | 503.63 | 8.36 |
| -1 | -6 | 4 | 492.43 | 8.26 |
| -1 | -6 | 4 | 557.94 | 8.58 |
| -1 | -6 | 4 | 574.06 | 8.96 |
| -1 | -6 | 5 | 36.95  | 2.20 |
| -1 | -6 | 5 | 40.13  | 2.39 |
| -1 | -6 | 5 | 33.09  | 2.11 |
| -1 | -6 | 5 | 43.20  | 2.37 |
| -1 | -6 | 5 | 42.91  | 2.07 |
| -1 | -6 | 5 | 42.20  | 2.36 |
| -1 | -6 | 5 | 32.97  | 1.68 |
| -1 | -6 | 5 | 41.73  | 2.43 |
| -1 | -6 | 5 | 40.04  | 2.31 |
| -1 | -6 | 5 | 36.69  | 2.28 |
| -1 | -6 | 5 | 41.70  | 2.25 |
| -1 | -6 | 5 | 37.73  | 2.11 |
| -1 | -6 | 5 | 40.95  | 2.49 |
| -1 | -6 | 6 | 154.99 | 4.43 |
| -1 | -6 | 6 | 164.53 | 4.71 |
| -1 | -6 | 6 | 172.88 | 4.87 |
| -1 | -6 | 6 | 160.97 | 4.64 |
| -1 | -6 | 6 | 163.02 | 4.68 |
| -1 | -6 | 6 | 141.32 | 4.32 |
| -1 | -6 | 6 | 152.06 | 3.91 |
| -1 | -6 | 6 | 157.20 | 4.58 |
| -1 | -6 | 6 | 183.49 | 4.99 |
| -1 | -6 | 6 | 167.79 | 4.78 |
| -1 | -6 | 6 | 204.46 | 5.04 |
| -1 | -6 | 6 | 162.12 | 4.47 |
| -1 | -6 | 6 | 187.67 | 5.72 |
| -1 | -6 | 6 | 169.12 | 4.78 |
| -1 | -6 | 7 | 212.51 | 5.34 |
| -1 | -6 | 7 | 221.62 | 5.66 |
| -1 | -6 | 7 | 206.67 | 5.64 |

## CIF 31

|    |    |    |        |      |
|----|----|----|--------|------|
| -1 | -6 | 7  | 198.67 | 5.65 |
| -1 | -6 | 7  | 190.78 | 5.21 |
| -1 | -6 | 7  | 211.98 | 5.67 |
| -1 | -6 | 7  | 219.59 | 4.65 |
| -1 | -6 | 7  | 210.01 | 5.28 |
| -1 | -6 | 7  | 204.03 | 5.57 |
| -1 | -6 | 7  | 214.88 | 5.69 |
| -1 | -6 | 7  | 205.07 | 5.25 |
| -1 | -6 | 7  | 207.48 | 5.16 |
| -1 | -6 | 7  | 246.96 | 6.81 |
| -1 | -6 | 7  | 229.53 | 5.66 |
| -1 | -6 | 8  | 22.07  | 1.90 |
| -1 | -6 | 8  | 25.99  | 2.12 |
| -1 | -6 | 8  | 27.85  | 2.19 |
| -1 | -6 | 8  | 25.01  | 2.93 |
| -1 | -6 | 8  | 25.97  | 2.02 |
| -1 | -6 | 8  | 18.23  | 1.57 |
| -1 | -6 | 8  | 22.44  | 3.10 |
| -1 | -6 | 8  | 25.83  | 2.21 |
| -1 | -6 | 8  | 23.42  | 1.92 |
| -1 | -6 | 8  | 27.74  | 1.95 |
| -1 | -6 | 8  | 22.95  | 1.94 |
| -1 | -6 | 9  | 414.12 | 8.18 |
| -1 | -6 | 9  | 405.93 | 8.31 |
| -1 | -6 | 9  | 414.98 | 8.57 |
| -1 | -6 | 9  | 396.60 | 8.86 |
| -1 | -6 | 9  | 394.67 | 7.85 |
| -1 | -6 | 9  | 357.95 | 8.54 |
| -1 | -6 | 9  | 415.43 | 8.75 |
| -1 | -6 | 9  | 426.97 | 8.12 |
| -1 | -6 | 9  | 395.62 | 7.68 |
| -1 | -6 | 9  | 370.25 | 7.70 |
| -1 | -6 | 10 | 315.68 | 8.21 |
| -1 | -6 | 10 | 346.30 | 7.72 |
| -1 | -6 | 10 | 357.37 | 8.02 |
| -1 | -6 | 10 | 317.38 | 8.13 |
| -1 | -6 | 10 | 344.03 | 7.19 |
| -1 | -6 | 10 | 328.72 | 7.27 |
| -1 | -6 | 10 | 355.12 | 8.14 |
| -1 | -6 | 10 | 336.75 | 7.16 |
| -1 | -6 | 10 | 346.61 | 7.08 |

## CIF 31

|    |    |     |        |      |
|----|----|-----|--------|------|
| -1 | -6 | 10  | 378.21 | 8.39 |
| -1 | -6 | 10  | 328.93 | 6.98 |
| -1 | -6 | 11  | 301.49 | 7.25 |
| -1 | -6 | 11  | 313.99 | 7.51 |
| -1 | -6 | 11  | 322.79 | 7.98 |
| -1 | -6 | 11  | 302.86 | 8.02 |
| -1 | -6 | 11  | 305.16 | 6.50 |
| -1 | -6 | 11  | 332.06 | 7.28 |
| -1 | -6 | 11  | 280.86 | 7.38 |
| -1 | -6 | 11  | 291.73 | 6.53 |
| -1 | -6 | 11  | 334.19 | 7.59 |
| -1 | -6 | 12  | 90.15  | 3.72 |
| -1 | -6 | 12  | 81.87  | 3.38 |
| -1 | -6 | 12  | 85.92  | 3.67 |
| -1 | -6 | 12  | 95.97  | 4.11 |
| -1 | -6 | 12  | 86.93  | 4.39 |
| -1 | -6 | 12  | 77.08  | 3.27 |
| -1 | -6 | 12  | 81.61  | 3.12 |
| -1 | -6 | 12  | 85.59  | 3.57 |
| -1 | -6 | 13  | 44.82  | 2.32 |
| -1 | -6 | 13  | 45.19  | 2.48 |
| -1 | -6 | 13  | 47.20  | 2.58 |
| -1 | -6 | 13  | 53.08  | 2.89 |
| -1 | -6 | 13  | 43.05  | 2.32 |
| -1 | -6 | 13  | 44.25  | 2.31 |
| -1 | -6 | 14  | 5.72   | 1.00 |
| -1 | -6 | 14  | 5.48   | 0.84 |
| -1 | -6 | 14  | 6.67   | 1.01 |
| -1 | -6 | 15  | 36.71  | 1.42 |
| -1 | -6 | 15  | 46.13  | 1.90 |
| -1 | -5 | -11 | 24.47  | 1.30 |
| -1 | -5 | -11 | 26.05  | 1.58 |
| -1 | -5 | -10 | 230.42 | 4.41 |
| -1 | -5 | -10 | 218.28 | 5.49 |
| -1 | -5 | -10 | 211.76 | 4.94 |
| -1 | -5 | -9  | 19.69  | 1.40 |
| -1 | -5 | -9  | 19.55  | 1.60 |
| -1 | -5 | -9  | 20.16  | 2.10 |
| -1 | -5 | -9  | 17.00  | 1.68 |
| -1 | -5 | -8  | 34.23  | 1.84 |
| -1 | -5 | -8  | 36.49  | 2.30 |

## CIF 31

|    |    |    |         |       |
|----|----|----|---------|-------|
| -1 | -5 | -8 | 34.71   | 2.73  |
| -1 | -5 | -8 | 41.92   | 2.38  |
| -1 | -5 | -8 | 37.03   | 2.08  |
| -1 | -5 | -8 | 35.50   | 2.01  |
| -1 | -5 | -7 | 5.42    | 1.05  |
| -1 | -5 | -7 | 5.10    | 1.29  |
| -1 | -5 | -7 | 3.78    | 1.39  |
| -1 | -5 | -7 | 2.66    | 1.05  |
| -1 | -5 | -7 | 4.78    | 1.00  |
| -1 | -5 | -7 | 5.10    | 1.02  |
| -1 | -5 | -6 | 117.49  | 3.80  |
| -1 | -5 | -6 | 121.55  | 4.62  |
| -1 | -5 | -6 | 116.82  | 4.06  |
| -1 | -5 | -6 | 110.97  | 3.84  |
| -1 | -5 | -6 | 110.68  | 3.54  |
| -1 | -5 | -6 | 105.07  | 3.66  |
| -1 | -5 | -6 | 117.60  | 3.85  |
| -1 | -5 | -6 | 97.73   | 3.33  |
| -1 | -5 | -5 | 27.06   | 1.97  |
| -1 | -5 | -5 | 21.90   | 1.82  |
| -1 | -5 | -5 | 21.95   | 1.66  |
| -1 | -5 | -5 | 21.17   | 1.73  |
| -1 | -5 | -5 | 29.34   | 1.95  |
| -1 | -5 | -5 | 21.33   | 1.68  |
| -1 | -5 | -4 | 2959.40 | 29.76 |
| -1 | -5 | -4 | 2784.35 | 27.95 |
| -1 | -5 | -4 | 2922.05 | 28.87 |
| -1 | -5 | -4 | 2741.52 | 28.06 |
| -1 | -5 | -4 | 2699.31 | 27.50 |
| -1 | -5 | -4 | 2516.83 | 26.63 |
| -1 | -5 | -4 | 2830.02 | 28.28 |
| -1 | -5 | -4 | 2782.19 | 27.77 |
| -1 | -5 | -4 | 2766.55 | 27.75 |
| -1 | -5 | -3 | 556.02  | 8.64  |
| -1 | -5 | -3 | 517.25  | 8.08  |
| -1 | -5 | -3 | 511.75  | 7.76  |
| -1 | -5 | -3 | 579.86  | 8.95  |
| -1 | -5 | -3 | 574.70  | 8.48  |
| -1 | -5 | -3 | 557.66  | 8.57  |
| -1 | -5 | -2 | 50.33   | 2.20  |
| -1 | -5 | -2 | 47.18   | 2.66  |

## CIF 31

|    |    |    |         |       |
|----|----|----|---------|-------|
| -1 | -5 | -2 | 48.36   | 2.02  |
| -1 | -5 | -2 | 53.11   | 2.32  |
| -1 | -5 | -2 | 51.07   | 1.98  |
| -1 | -5 | -2 | 44.20   | 1.83  |
| -1 | -5 | -2 | 48.05   | 2.23  |
| -1 | -5 | -2 | 53.00   | 2.39  |
| -1 | -5 | -2 | 51.45   | 2.12  |
| -1 | -5 | -2 | 50.72   | 2.22  |
| -1 | -5 | -2 | 49.00   | 2.43  |
| -1 | -5 | -1 | 69.30   | 3.01  |
| -1 | -5 | -1 | 62.14   | 2.92  |
| -1 | -5 | -1 | 71.42   | 3.00  |
| -1 | -5 | -1 | 62.47   | 2.40  |
| -1 | -5 | -1 | 66.64   | 2.48  |
| -1 | -5 | -1 | 69.52   | 2.74  |
| -1 | -5 | -1 | 67.90   | 2.66  |
| -1 | -5 | -1 | 75.35   | 2.90  |
| -1 | -5 | -1 | 66.73   | 2.50  |
| -1 | -5 | -1 | 71.75   | 2.47  |
| -1 | -5 | 0  | 83.72   | 3.18  |
| -1 | -5 | 0  | 72.27   | 2.98  |
| -1 | -5 | 0  | 79.65   | 3.10  |
| -1 | -5 | 0  | 77.23   | 2.61  |
| -1 | -5 | 0  | 64.57   | 2.44  |
| -1 | -5 | 0  | 67.44   | 2.71  |
| -1 | -5 | 0  | 89.61   | 2.95  |
| -1 | -5 | 0  | 64.60   | 2.62  |
| -1 | -5 | 0  | 67.81   | 1.94  |
| -1 | -5 | 0  | 70.24   | 2.51  |
| -1 | -5 | 1  | 1783.90 | 19.62 |
| -1 | -5 | 1  | 1801.60 | 20.19 |
| -1 | -5 | 1  | 1988.61 | 20.39 |
| -1 | -5 | 1  | 1731.68 | 19.68 |
| -1 | -5 | 1  | 1886.30 | 20.24 |
| -1 | -5 | 1  | 1692.04 | 18.29 |
| -1 | -5 | 1  | 1709.27 | 17.37 |
| -1 | -5 | 1  | 1784.04 | 19.08 |
| -1 | -5 | 1  | 1821.51 | 18.70 |
| -1 | -5 | 1  | 1729.00 | 19.04 |
| -1 | -5 | 1  | 1877.15 | 18.97 |
| -1 | -5 | 1  | 1800.44 | 19.23 |

## CIF 31

|    |    |   |         |       |
|----|----|---|---------|-------|
| -1 | -5 | 1 | 1960.16 | 18.01 |
| -1 | -5 | 1 | 1984.66 | 19.45 |
| -1 | -5 | 2 | 266.09  | 5.57  |
| -1 | -5 | 2 | 265.18  | 5.44  |
| -1 | -5 | 2 | 255.50  | 4.21  |
| -1 | -5 | 2 | 237.01  | 4.88  |
| -1 | -5 | 2 | 252.62  | 5.10  |
| -1 | -5 | 2 | 252.79  | 5.06  |
| -1 | -5 | 2 | 241.08  | 4.70  |
| -1 | -5 | 2 | 229.01  | 4.95  |
| -1 | -5 | 2 | 237.35  | 5.00  |
| -1 | -5 | 2 | 263.01  | 4.68  |
| -1 | -5 | 2 | 230.52  | 4.93  |
| -1 | -5 | 3 | 553.12  | 8.50  |
| -1 | -5 | 3 | 548.11  | 7.19  |
| -1 | -5 | 3 | 579.43  | 8.67  |
| -1 | -5 | 3 | 569.20  | 8.39  |
| -1 | -5 | 3 | 567.04  | 7.34  |
| -1 | -5 | 3 | 557.71  | 8.24  |
| -1 | -5 | 3 | 528.18  | 6.92  |
| -1 | -5 | 3 | 597.01  | 8.79  |
| -1 | -5 | 3 | 547.13  | 8.18  |
| -1 | -5 | 3 | 627.62  | 7.97  |
| -1 | -5 | 3 | 573.05  | 8.40  |
| -1 | -5 | 3 | 584.00  | 8.45  |
| -1 | -5 | 3 | 586.44  | 8.35  |
| -1 | -5 | 3 | 605.18  | 8.27  |
| -1 | -5 | 3 | 559.08  | 8.45  |
| -1 | -5 | 4 | 2379.72 | 24.27 |
| -1 | -5 | 4 | 2362.95 | 24.10 |
| -1 | -5 | 4 | 2349.73 | 23.16 |
| -1 | -5 | 4 | 2338.82 | 24.21 |
| -1 | -5 | 4 | 2487.59 | 24.64 |
| -1 | -5 | 4 | 2207.93 | 23.63 |
| -1 | -5 | 4 | 2575.42 | 24.18 |
| -1 | -5 | 4 | 2616.14 | 24.52 |
| -1 | -5 | 4 | 2477.60 | 22.98 |
| -1 | -5 | 4 | 2510.76 | 24.48 |
| -1 | -5 | 4 | 2495.32 | 24.21 |
| -1 | -5 | 4 | 2266.78 | 20.91 |
| -1 | -5 | 4 | 2341.76 | 23.82 |



## CIF 31

|    |    |   |         |       |
|----|----|---|---------|-------|
| -1 | -5 | 4 | 2683.17 | 25.46 |
| -1 | -5 | 4 | 2225.90 | 22.73 |
| -1 | -5 | 5 | 2619.91 | 25.05 |
| -1 | -5 | 5 | 2465.16 | 25.10 |
| -1 | -5 | 5 | 2372.72 | 23.18 |
| -1 | -5 | 5 | 2295.65 | 24.97 |
| -1 | -5 | 5 | 2262.57 | 24.61 |
| -1 | -5 | 5 | 2714.76 | 25.61 |
| -1 | -5 | 5 | 2320.15 | 23.86 |
| -1 | -5 | 5 | 2587.33 | 25.07 |
| -1 | -5 | 5 | 2436.97 | 25.19 |
| -1 | -5 | 5 | 2391.20 | 24.59 |
| -1 | -5 | 5 | 2573.08 | 25.33 |
| -1 | -5 | 5 | 2642.34 | 24.03 |
| -1 | -5 | 5 | 2497.11 | 24.94 |
| -1 | -5 | 5 | 2460.20 | 22.40 |
| -1 | -5 | 5 | 2677.43 | 25.05 |
| -1 | -5 | 5 | 2297.73 | 25.67 |
| -1 | -5 | 5 | 2607.79 | 25.45 |
| -1 | -5 | 6 | 87.90   | 3.08  |
| -1 | -5 | 6 | 93.85   | 3.10  |
| -1 | -5 | 6 | 81.54   | 3.08  |
| -1 | -5 | 6 | 84.17   | 3.15  |
| -1 | -5 | 6 | 97.41   | 3.30  |
| -1 | -5 | 6 | 94.28   | 3.36  |
| -1 | -5 | 6 | 98.95   | 3.20  |
| -1 | -5 | 6 | 79.90   | 2.79  |
| -1 | -5 | 6 | 91.89   | 3.13  |
| -1 | -5 | 6 | 93.85   | 3.33  |
| -1 | -5 | 6 | 87.95   | 2.60  |
| -1 | -5 | 6 | 90.24   | 3.09  |
| -1 | -5 | 6 | 103.51  | 2.54  |
| -1 | -5 | 6 | 90.47   | 3.07  |
| -1 | -5 | 6 | 78.86   | 3.52  |
| -1 | -5 | 6 | 91.43   | 3.23  |
| -1 | -5 | 7 | 48.27   | 2.35  |
| -1 | -5 | 7 | 53.93   | 2.62  |
| -1 | -5 | 7 | 50.12   | 2.46  |
| -1 | -5 | 7 | 52.50   | 2.64  |
| -1 | -5 | 7 | 54.56   | 2.56  |
| -1 | -5 | 7 | 54.45   | 2.76  |

## CIF 31

|    |    |    |        |       |
|----|----|----|--------|-------|
| -1 | -5 | 7  | 50.41  | 2.48  |
| -1 | -5 | 7  | 46.65  | 2.56  |
| -1 | -5 | 7  | 51.91  | 2.30  |
| -1 | -5 | 7  | 48.34  | 2.61  |
| -1 | -5 | 7  | 49.67  | 2.41  |
| -1 | -5 | 7  | 55.18  | 2.04  |
| -1 | -5 | 7  | 53.46  | 2.49  |
| -1 | -5 | 7  | 52.01  | 2.46  |
| -1 | -5 | 8  | 595.70 | 10.26 |
| -1 | -5 | 8  | 557.98 | 9.16  |
| -1 | -5 | 8  | 609.12 | 9.82  |
| -1 | -5 | 8  | 626.66 | 10.27 |
| -1 | -5 | 8  | 648.88 | 10.02 |
| -1 | -5 | 8  | 591.32 | 10.27 |
| -1 | -5 | 8  | 622.51 | 9.79  |
| -1 | -5 | 8  | 559.98 | 9.80  |
| -1 | -5 | 8  | 612.35 | 8.83  |
| -1 | -5 | 8  | 594.25 | 9.61  |
| -1 | -5 | 8  | 622.02 | 8.82  |
| -1 | -5 | 8  | 616.95 | 9.65  |
| -1 | -5 | 8  | 586.87 | 10.76 |
| -1 | -5 | 8  | 614.31 | 9.55  |
| -1 | -5 | 9  | 611.85 | 9.78  |
| -1 | -5 | 9  | 603.28 | 10.22 |
| -1 | -5 | 9  | 618.97 | 10.67 |
| -1 | -5 | 9  | 663.32 | 10.53 |
| -1 | -5 | 9  | 604.50 | 10.94 |
| -1 | -5 | 9  | 579.62 | 9.86  |
| -1 | -5 | 9  | 565.64 | 10.75 |
| -1 | -5 | 9  | 644.09 | 10.98 |
| -1 | -5 | 9  | 614.18 | 10.12 |
| -1 | -5 | 9  | 605.62 | 9.28  |
| -1 | -5 | 9  | 633.58 | 10.11 |
| -1 | -5 | 9  | 680.52 | 11.91 |
| -1 | -5 | 9  | 623.43 | 9.72  |
| -1 | -5 | 10 | 231.35 | 5.59  |
| -1 | -5 | 10 | 240.37 | 6.20  |
| -1 | -5 | 10 | 232.37 | 6.37  |
| -1 | -5 | 10 | 266.75 | 6.37  |
| -1 | -5 | 10 | 232.02 | 6.97  |
| -1 | -5 | 10 | 224.84 | 5.77  |

## CIF 31

|    |    |     |        |      |
|----|----|-----|--------|------|
| -1 | -5 | 10  | 218.38 | 6.78 |
| -1 | -5 | 10  | 220.63 | 6.30 |
| -1 | -5 | 10  | 219.16 | 5.82 |
| -1 | -5 | 10  | 257.45 | 5.92 |
| -1 | -5 | 10  | 232.83 | 5.81 |
| -1 | -5 | 10  | 248.79 | 6.55 |
| -1 | -5 | 11  | 39.95  | 2.58 |
| -1 | -5 | 11  | 39.29  | 2.71 |
| -1 | -5 | 11  | 42.30  | 2.58 |
| -1 | -5 | 11  | 39.48  | 2.40 |
| -1 | -5 | 11  | 36.38  | 3.82 |
| -1 | -5 | 11  | 35.12  | 2.72 |
| -1 | -5 | 11  | 44.54  | 2.60 |
| -1 | -5 | 11  | 39.09  | 2.68 |
| -1 | -5 | 11  | 40.03  | 2.40 |
| -1 | -5 | 11  | 45.75  | 2.90 |
| -1 | -5 | 12  | 226.43 | 6.99 |
| -1 | -5 | 12  | 226.66 | 5.98 |
| -1 | -5 | 12  | 222.37 | 6.23 |
| -1 | -5 | 12  | 238.88 | 5.86 |
| -1 | -5 | 12  | 230.56 | 5.81 |
| -1 | -5 | 12  | 218.42 | 5.60 |
| -1 | -5 | 12  | 233.72 | 5.96 |
| -1 | -5 | 13  | 37.78  | 2.46 |
| -1 | -5 | 13  | 37.16  | 2.44 |
| -1 | -5 | 13  | 35.74  | 2.35 |
| -1 | -5 | 13  | 42.02  | 2.63 |
| -1 | -5 | 13  | 36.58  | 2.28 |
| -1 | -5 | 13  | 32.78  | 1.99 |
| -1 | -5 | 14  | 179.37 | 4.36 |
| -1 | -5 | 14  | 181.23 | 4.66 |
| -1 | -5 | 14  | 184.88 | 4.75 |
| -1 | -5 | 15  | 7.54   | 0.90 |
| -1 | -5 | 15  | 5.74   | 0.66 |
| -1 | -5 | 15  | 7.49   | 0.89 |
| -1 | -5 | 15  | 7.06   | 1.00 |
| -1 | -4 | -12 | 372.91 | 5.96 |
| -1 | -4 | -12 | 323.34 | 5.16 |
| -1 | -4 | -11 | 0.03   | 0.50 |
| -1 | -4 | -11 | 0.34   | 0.69 |
| -1 | -4 | -11 | 1.14   | 0.70 |

## CIF 31

|    |    |     |         |       |
|----|----|-----|---------|-------|
| -1 | -4 | -11 | 0.06    | 0.58  |
| -1 | -4 | -10 | 4.03    | 1.01  |
| -1 | -4 | -10 | 3.68    | 1.07  |
| -1 | -4 | -10 | 4.27    | 0.92  |
| -1 | -4 | -10 | 4.54    | 0.90  |
| -1 | -4 | -10 | 3.87    | 0.80  |
| -1 | -4 | -9  | 76.11   | 3.08  |
| -1 | -4 | -9  | 70.16   | 5.56  |
| -1 | -4 | -9  | 77.33   | 4.00  |
| -1 | -4 | -9  | 80.93   | 3.64  |
| -1 | -4 | -9  | 80.43   | 3.27  |
| -1 | -4 | -9  | 69.02   | 2.87  |
| -1 | -4 | -9  | 76.39   | 2.95  |
| -1 | -4 | -8  | 1637.38 | 18.41 |
| -1 | -4 | -8  | 1633.66 | 21.51 |
| -1 | -4 | -8  | 1740.49 | 22.57 |
| -1 | -4 | -8  | 1676.82 | 19.76 |
| -1 | -4 | -8  | 1778.34 | 19.56 |
| -1 | -4 | -8  | 1705.12 | 19.47 |
| -1 | -4 | -7  | 4.31    | 0.99  |
| -1 | -4 | -7  | 4.70    | 5.22  |
| -1 | -4 | -7  | 5.49    | 1.16  |
| -1 | -4 | -7  | 1.86    | 0.90  |
| -1 | -4 | -7  | 3.34    | 0.98  |
| -1 | -4 | -6  | 13.64   | 1.40  |
| -1 | -4 | -6  | 19.45   | 4.62  |
| -1 | -4 | -6  | 14.81   | 1.60  |
| -1 | -4 | -6  | 15.74   | 2.85  |
| -1 | -4 | -6  | 12.94   | 1.48  |
| -1 | -4 | -6  | 19.22   | 2.01  |
| -1 | -4 | -6  | 13.04   | 1.38  |
| -1 | -4 | -6  | 12.35   | 1.29  |
| -1 | -4 | -6  | 19.37   | 1.66  |
| -1 | -4 | -5  | 16.70   | 1.47  |
| -1 | -4 | -5  | 17.83   | 3.86  |
| -1 | -4 | -5  | 17.75   | 1.49  |
| -1 | -4 | -5  | 12.14   | 1.37  |
| -1 | -4 | -5  | 12.55   | 1.41  |
| -1 | -4 | -5  | 18.40   | 1.65  |
| -1 | -4 | -5  | 21.74   | 1.90  |
| -1 | -4 | -5  | 12.63   | 1.28  |

## CIF 31

|    |    |    |        |      |
|----|----|----|--------|------|
| -1 | -4 | -5 | 13.00  | 1.27 |
| -1 | -4 | -5 | 12.84  | 1.21 |
| -1 | -4 | -4 | 1.09   | 0.66 |
| -1 | -4 | -4 | 1.00   | 0.68 |
| -1 | -4 | -4 | 1.07   | 2.49 |
| -1 | -4 | -4 | 1.79   | 0.79 |
| -1 | -4 | -4 | 0.16   | 0.56 |
| -1 | -4 | -4 | 1.30   | 0.61 |
| -1 | -4 | -4 | 1.22   | 0.60 |
| -1 | -4 | -4 | 0.60   | 0.59 |
| -1 | -4 | -4 | 0.79   | 0.56 |
| -1 | -4 | -3 | 405.76 | 7.52 |
| -1 | -4 | -3 | 407.40 | 6.78 |
| -1 | -4 | -3 | 400.99 | 6.29 |
| -1 | -4 | -3 | 396.10 | 7.03 |
| -1 | -4 | -3 | 409.09 | 6.64 |
| -1 | -4 | -2 | 46.41  | 2.27 |
| -1 | -4 | -2 | 46.65  | 2.35 |
| -1 | -4 | -2 | 53.40  | 1.86 |
| -1 | -4 | -2 | 44.21  | 1.78 |
| -1 | -4 | -2 | 48.86  | 2.14 |
| -1 | -4 | -2 | 47.06  | 2.03 |
| -1 | -4 | -2 | 48.59  | 2.18 |
| -1 | -4 | -1 | 100.58 | 2.37 |
| -1 | -4 | -1 | 92.31  | 2.65 |
| -1 | -4 | -1 | 105.47 | 2.96 |
| -1 | -4 | -1 | 102.76 | 2.79 |
| -1 | -4 | -1 | 105.74 | 3.06 |
| -1 | -4 | -1 | 95.09  | 1.98 |
| -1 | -4 | -1 | 100.54 | 2.62 |
| -1 | -4 | 0  | 676.59 | 7.67 |
| -1 | -4 | 0  | 699.35 | 8.69 |
| -1 | -4 | 0  | 723.68 | 9.12 |
| -1 | -4 | 0  | 695.88 | 7.72 |
| -1 | -4 | 0  | 727.75 | 8.71 |
| -1 | -4 | 1  | 26.63  | 1.07 |
| -1 | -4 | 1  | 26.79  | 1.39 |
| -1 | -4 | 1  | 23.60  | 1.52 |
| -1 | -4 | 1  | 26.12  | 1.42 |
| -1 | -4 | 1  | 28.06  | 1.40 |
| -1 | -4 | 1  | 25.73  | 1.46 |

## CIF 31

|    |    |   |         |       |
|----|----|---|---------|-------|
| -1 | -4 | 1 | 25.58   | 1.20  |
| -1 | -4 | 1 | 22.63   | 1.35  |
| -1 | -4 | 2 | 102.55  | 2.21  |
| -1 | -4 | 2 | 91.37   | 2.05  |
| -1 | -4 | 2 | 87.74   | 1.94  |
| -1 | -4 | 2 | 110.31  | 2.77  |
| -1 | -4 | 2 | 102.87  | 2.56  |
| -1 | -4 | 2 | 85.63   | 1.11  |
| -1 | -4 | 2 | 111.49  | 2.85  |
| -1 | -4 | 2 | 106.70  | 2.65  |
| -1 | -4 | 2 | 95.06   | 2.72  |
| -1 | -4 | 3 | 1986.64 | 19.03 |
| -1 | -4 | 3 | 1846.70 | 18.47 |
| -1 | -4 | 3 | 2076.22 | 19.74 |
| -1 | -4 | 3 | 2057.41 | 20.11 |
| -1 | -4 | 3 | 1977.63 | 19.67 |
| -1 | -4 | 3 | 2054.38 | 19.06 |
| -1 | -4 | 3 | 1923.16 | 19.26 |
| -1 | -4 | 3 | 1994.48 | 17.28 |
| -1 | -4 | 3 | 2022.16 | 19.71 |
| -1 | -4 | 3 | 2029.55 | 20.21 |
| -1 | -4 | 4 | 300.17  | 5.19  |
| -1 | -4 | 4 | 263.19  | 5.03  |
| -1 | -4 | 4 | 318.89  | 5.12  |
| -1 | -4 | 4 | 313.50  | 4.87  |
| -1 | -4 | 4 | 284.02  | 4.94  |
| -1 | -4 | 4 | 304.40  | 5.30  |
| -1 | -4 | 4 | 293.27  | 5.24  |
| -1 | -4 | 4 | 288.71  | 4.47  |
| -1 | -4 | 4 | 282.21  | 4.72  |
| -1 | -4 | 4 | 308.82  | 3.98  |
| -1 | -4 | 4 | 302.96  | 5.18  |
| -1 | -4 | 4 | 282.93  | 5.80  |
| -1 | -4 | 4 | 302.17  | 5.24  |
| -1 | -4 | 5 | 735.99  | 9.40  |
| -1 | -4 | 5 | 780.38  | 9.52  |
| -1 | -4 | 5 | 689.98  | 9.38  |
| -1 | -4 | 5 | 722.01  | 9.39  |
| -1 | -4 | 5 | 748.61  | 9.45  |
| -1 | -4 | 5 | 712.92  | 8.81  |
| -1 | -4 | 5 | 652.65  | 8.70  |

## CIF 31

|    |    |   |         |       |
|----|----|---|---------|-------|
| -1 | -4 | 5 | 706.00  | 9.15  |
| -1 | -4 | 5 | 720.97  | 9.51  |
| -1 | -4 | 5 | 672.25  | 8.49  |
| -1 | -4 | 5 | 683.33  | 7.92  |
| -1 | -4 | 5 | 741.35  | 9.31  |
| -1 | -4 | 5 | 603.36  | 9.89  |
| -1 | -4 | 6 | 1317.04 | 14.82 |
| -1 | -4 | 6 | 1281.86 | 14.83 |
| -1 | -4 | 6 | 1255.31 | 15.14 |
| -1 | -4 | 6 | 1392.28 | 15.37 |
| -1 | -4 | 6 | 1417.14 | 15.59 |
| -1 | -4 | 6 | 1364.46 | 15.24 |
| -1 | -4 | 6 | 1269.52 | 14.70 |
| -1 | -4 | 6 | 1311.63 | 14.38 |
| -1 | -4 | 6 | 1231.40 | 14.28 |
| -1 | -4 | 6 | 1350.77 | 15.42 |
| -1 | -4 | 6 | 1361.00 | 14.14 |
| -1 | -4 | 6 | 1309.94 | 15.06 |
| -1 | -4 | 6 | 1400.42 | 13.91 |
| -1 | -4 | 6 | 1370.87 | 15.10 |
| -1 | -4 | 7 | 83.05   | 2.59  |
| -1 | -4 | 7 | 93.48   | 3.11  |
| -1 | -4 | 7 | 96.56   | 3.28  |
| -1 | -4 | 7 | 96.07   | 3.44  |
| -1 | -4 | 7 | 96.65   | 3.20  |
| -1 | -4 | 7 | 94.97   | 3.29  |
| -1 | -4 | 7 | 86.04   | 3.07  |
| -1 | -4 | 7 | 106.39  | 2.93  |
| -1 | -4 | 7 | 99.54   | 3.26  |
| -1 | -4 | 7 | 77.72   | 3.65  |
| -1 | -4 | 7 | 103.04  | 3.11  |
| -1 | -4 | 8 | 215.17  | 5.11  |
| -1 | -4 | 8 | 225.14  | 5.34  |
| -1 | -4 | 8 | 227.59  | 5.67  |
| -1 | -4 | 8 | 215.65  | 5.19  |
| -1 | -4 | 8 | 218.79  | 5.47  |
| -1 | -4 | 8 | 224.50  | 4.73  |
| -1 | -4 | 8 | 218.82  | 5.25  |
| -1 | -4 | 8 | 214.17  | 6.20  |
| -1 | -4 | 8 | 216.76  | 4.76  |
| -1 | -4 | 9 | 156.64  | 4.42  |

## CIF 31

|    |    |    |        |      |
|----|----|----|--------|------|
| -1 | -4 | 9  | 143.10 | 4.47 |
| -1 | -4 | 9  | 112.36 | 4.37 |
| -1 | -4 | 9  | 114.44 | 4.29 |
| -1 | -4 | 9  | 126.39 | 4.14 |
| -1 | -4 | 9  | 150.23 | 4.15 |
| -1 | -4 | 9  | 145.33 | 4.46 |
| -1 | -4 | 9  | 127.57 | 4.64 |
| -1 | -4 | 9  | 147.73 | 3.87 |
| -1 | -4 | 10 | 20.00  | 1.91 |
| -1 | -4 | 10 | 20.67  | 1.81 |
| -1 | -4 | 10 | 17.86  | 2.39 |
| -1 | -4 | 10 | 22.33  | 1.82 |
| -1 | -4 | 10 | 19.09  | 1.82 |
| -1 | -4 | 10 | 20.92  | 2.17 |
| -1 | -4 | 10 | 17.55  | 1.67 |
| -1 | -4 | 11 | 1.25   | 0.87 |
| -1 | -4 | 11 | 0.36   | 0.95 |
| -1 | -4 | 11 | -0.21  | 1.92 |
| -1 | -4 | 11 | 1.13   | 0.90 |
| -1 | -4 | 11 | 0.68   | 0.97 |
| -1 | -4 | 11 | 0.93   | 1.23 |
| -1 | -4 | 11 | -0.17  | 0.85 |
| -1 | -4 | 11 | 0.96   | 0.91 |
| -1 | -4 | 12 | 14.02  | 1.63 |
| -1 | -4 | 12 | 16.24  | 2.39 |
| -1 | -4 | 12 | 13.49  | 1.53 |
| -1 | -4 | 12 | 11.06  | 2.74 |
| -1 | -4 | 12 | 13.47  | 1.84 |
| -1 | -4 | 12 | 14.38  | 1.65 |
| -1 | -4 | 12 | 13.59  | 1.54 |
| -1 | -4 | 12 | 11.55  | 1.40 |
| -1 | -4 | 13 | 5.85   | 1.51 |
| -1 | -4 | 13 | 5.50   | 1.13 |
| -1 | -4 | 13 | 6.80   | 1.43 |
| -1 | -4 | 13 | 7.04   | 1.79 |
| -1 | -4 | 13 | 5.83   | 1.31 |
| -1 | -4 | 13 | 4.84   | 1.09 |
| -1 | -4 | 14 | 22.05  | 1.73 |
| -1 | -4 | 14 | 22.74  | 1.84 |
| -1 | -4 | 14 | 21.62  | 1.54 |
| -1 | -4 | 14 | 23.99  | 1.73 |



## CIF 31

|    |    |     |        |      |
|----|----|-----|--------|------|
| -1 | -4 | 14  | 24.31  | 1.83 |
| -1 | -4 | 14  | 21.28  | 1.48 |
| -1 | -4 | 15  | 26.59  | 1.43 |
| -1 | -4 | 15  | 24.90  | 1.55 |
| -1 | -4 | 15  | 22.24  | 1.46 |
| -1 | -3 | -12 | 255.78 | 5.20 |
| -1 | -3 | -12 | 284.55 | 4.72 |
| -1 | -3 | -12 | 286.37 | 4.74 |
| -1 | -3 | -12 | 256.43 | 5.68 |
| -1 | -3 | -11 | 149.26 | 4.94 |
| -1 | -3 | -11 | 145.78 | 4.47 |
| -1 | -3 | -11 | 149.79 | 3.99 |
| -1 | -3 | -11 | 150.84 | 3.49 |
| -1 | -3 | -11 | 157.34 | 3.95 |
| -1 | -3 | -11 | 142.39 | 3.60 |
| -1 | -3 | -10 | 385.38 | 8.20 |
| -1 | -3 | -10 | 358.50 | 9.57 |
| -1 | -3 | -10 | 387.17 | 6.98 |
| -1 | -3 | -10 | 371.12 | 8.82 |
| -1 | -3 | -10 | 417.93 | 7.68 |
| -1 | -3 | -10 | 405.38 | 7.41 |
| -1 | -3 | -10 | 409.75 | 7.32 |
| -1 | -3 | -9  | 422.07 | 8.76 |
| -1 | -3 | -9  | 372.02 | 9.95 |
| -1 | -3 | -9  | 376.89 | 7.60 |
| -1 | -3 | -9  | 337.60 | 7.00 |
| -1 | -3 | -9  | 434.55 | 8.82 |
| -1 | -3 | -9  | 356.75 | 7.24 |
| -1 | -3 | -9  | 429.80 | 7.79 |
| -1 | -3 | -8  | 79.00  | 2.93 |
| -1 | -3 | -8  | 82.53  | 5.10 |
| -1 | -3 | -8  | 79.45  | 3.29 |
| -1 | -3 | -8  | 71.99  | 3.07 |
| -1 | -3 | -8  | 80.14  | 3.26 |
| -1 | -3 | -8  | 80.04  | 3.91 |
| -1 | -3 | -8  | 77.52  | 3.21 |
| -1 | -3 | -7  | 187.85 | 4.61 |
| -1 | -3 | -7  | 196.55 | 5.06 |
| -1 | -3 | -7  | 201.59 | 5.09 |
| -1 | -3 | -7  | 199.39 | 7.49 |
| -1 | -3 | -7  | 200.72 | 5.49 |

## CIF 31

|    |    |    |         |       |
|----|----|----|---------|-------|
| -1 | -3 | -7 | 191.98  | 4.93  |
| -1 | -3 | -7 | 209.18  | 5.06  |
| -1 | -3 | -6 | 1516.50 | 16.71 |
| -1 | -3 | -6 | 1489.30 | 17.06 |
| -1 | -3 | -6 | 1477.33 | 17.10 |
| -1 | -3 | -6 | 1329.25 | 18.14 |
| -1 | -3 | -6 | 1561.32 | 18.62 |
| -1 | -3 | -6 | 1552.32 | 17.81 |
| -1 | -3 | -6 | 1375.24 | 16.63 |
| -1 | -3 | -6 | 1485.66 | 16.31 |
| -1 | -3 | -5 | 259.17  | 6.09  |
| -1 | -3 | -5 | 249.32  | 4.93  |
| -1 | -3 | -5 | 261.63  | 5.98  |
| -1 | -3 | -5 | 249.31  | 5.12  |
| -1 | -3 | -5 | 245.23  | 4.91  |
| -1 | -3 | -5 | 243.72  | 5.64  |
| -1 | -3 | -5 | 232.87  | 4.66  |
| -1 | -3 | -5 | 242.41  | 4.95  |
| -1 | -3 | -4 | 24.25   | 1.65  |
| -1 | -3 | -4 | 25.27   | 1.89  |
| -1 | -3 | -4 | 19.45   | 1.32  |
| -1 | -3 | -4 | 23.21   | 1.45  |
| -1 | -3 | -4 | 23.55   | 1.53  |
| -1 | -3 | -4 | 21.07   | 1.44  |
| -1 | -3 | -4 | 26.55   | 1.46  |
| -1 | -3 | -3 | 266.90  | 4.62  |
| -1 | -3 | -3 | 269.52  | 4.30  |
| -1 | -3 | -2 | 1255.30 | 12.68 |
| -1 | -3 | -2 | 1291.30 | 13.63 |
| -1 | -3 | -2 | 1278.77 | 13.23 |
| -1 | -3 | -1 | 22.33   | 1.17  |
| -1 | -3 | -1 | 28.66   | 1.37  |
| -1 | -3 | -1 | 25.51   | 1.44  |
| -1 | -3 | -1 | 15.12   | 0.73  |
| -1 | -3 | -1 | 19.46   | 1.14  |
| -1 | -3 | 0  | 1025.20 | 10.46 |
| -1 | -3 | 0  | 1009.97 | 10.79 |
| -1 | -3 | 0  | 997.84  | 10.51 |
| -1 | -3 | 0  | 984.22  | 9.65  |
| -1 | -3 | 0  | 1015.64 | 10.43 |
| -1 | -3 | 1  | 777.03  | 7.53  |

## CIF 31

|    |    |   |         |       |
|----|----|---|---------|-------|
| -1 | -3 | 1 | 758.20  | 7.30  |
| -1 | -3 | 1 | 795.63  | 8.84  |
| -1 | -3 | 1 | 731.51  | 8.84  |
| -1 | -3 | 1 | 803.34  | 8.76  |
| -1 | -3 | 1 | 811.64  | 8.68  |
| -1 | -3 | 1 | 746.83  | 8.80  |
| -1 | -3 | 1 | 811.81  | 8.41  |
| -1 | -3 | 1 | 788.84  | 8.71  |
| -1 | -3 | 2 | 2699.44 | 25.71 |
| -1 | -3 | 2 | 2557.83 | 25.28 |
| -1 | -3 | 2 | 3092.85 | 26.65 |
| -1 | -3 | 2 | 3111.50 | 26.29 |
| -1 | -3 | 2 | 3422.15 | 26.90 |
| -1 | -3 | 2 | 2968.71 | 24.50 |
| -1 | -3 | 2 | 3045.73 | 26.71 |
| -1 | -3 | 2 | 3053.29 | 26.98 |
| -1 | -3 | 2 | 3071.51 | 26.63 |
| -1 | -3 | 3 | 161.56  | 3.27  |
| -1 | -3 | 3 | 168.19  | 3.28  |
| -1 | -3 | 3 | 177.26  | 3.18  |
| -1 | -3 | 3 | 171.75  | 2.91  |
| -1 | -3 | 3 | 165.13  | 3.16  |
| -1 | -3 | 3 | 169.47  | 3.27  |
| -1 | -3 | 3 | 159.30  | 2.83  |
| -1 | -3 | 3 | 154.79  | 2.99  |
| -1 | -3 | 3 | 165.99  | 3.26  |
| -1 | -3 | 3 | 152.83  | 3.59  |
| -1 | -3 | 4 | 1608.13 | 16.04 |
| -1 | -3 | 4 | 1577.33 | 16.06 |
| -1 | -3 | 4 | 1541.11 | 16.06 |
| -1 | -3 | 4 | 1841.01 | 16.03 |
| -1 | -3 | 4 | 1678.36 | 15.81 |
| -1 | -3 | 4 | 1692.00 | 16.00 |
| -1 | -3 | 4 | 1535.29 | 14.99 |
| -1 | -3 | 4 | 1605.14 | 15.60 |
| -1 | -3 | 4 | 1579.31 | 14.86 |
| -1 | -3 | 4 | 1677.07 | 16.20 |
| -1 | -3 | 4 | 1400.53 | 16.77 |
| -1 | -3 | 5 | 3779.29 | 34.12 |
| -1 | -3 | 5 | 3626.90 | 33.62 |
| -1 | -3 | 5 | 4165.95 | 34.38 |

## CIF 31

|    |    |    |         |       |
|----|----|----|---------|-------|
| -1 | -3 | 5  | 3878.06 | 34.57 |
| -1 | -3 | 5  | 3656.72 | 34.24 |
| -1 | -3 | 5  | 3700.99 | 33.47 |
| -1 | -3 | 5  | 3829.50 | 33.67 |
| -1 | -3 | 5  | 3979.39 | 33.29 |
| -1 | -3 | 5  | 3641.25 | 34.30 |
| -1 | -3 | 6  | 6446.05 | 53.83 |
| -1 | -3 | 6  | 5866.36 | 54.06 |
| -1 | -3 | 6  | 6017.87 | 54.44 |
| -1 | -3 | 6  | 6672.63 | 53.17 |
| -1 | -3 | 6  | 6282.02 | 53.04 |
| -1 | -3 | 6  | 6497.32 | 54.38 |
| -1 | -3 | 6  | 6064.93 | 53.36 |
| -1 | -3 | 6  | 6095.82 | 53.22 |
| -1 | -3 | 6  | 6214.93 | 54.48 |
| -1 | -3 | 6  | 5566.47 | 55.53 |
| -1 | -3 | 7  | 6702.88 | 57.16 |
| -1 | -3 | 7  | 6310.42 | 58.34 |
| -1 | -3 | 7  | 6613.66 | 58.81 |
| -1 | -3 | 7  | 7334.20 | 58.69 |
| -1 | -3 | 7  | 7124.51 | 58.58 |
| -1 | -3 | 7  | 6539.27 | 55.92 |
| -1 | -3 | 7  | 6524.15 | 55.95 |
| -1 | -3 | 7  | 6816.70 | 57.35 |
| -1 | -3 | 7  | 6707.19 | 57.34 |
| -1 | -3 | 7  | 6309.00 | 58.21 |
| -1 | -3 | 7  | 5547.85 | 59.02 |
| -1 | -3 | 8  | 511.30  | 9.56  |
| -1 | -3 | 8  | 600.20  | 9.14  |
| -1 | -3 | 8  | 542.73  | 8.10  |
| -1 | -3 | 8  | 626.15  | 8.68  |
| -1 | -3 | 8  | 557.64  | 9.07  |
| -1 | -3 | 8  | 598.23  | 7.95  |
| -1 | -3 | 9  | 330.49  | 6.71  |
| -1 | -3 | 9  | 309.41  | 7.11  |
| -1 | -3 | 9  | 314.38  | 5.95  |
| -1 | -3 | 9  | 313.09  | 6.76  |
| -1 | -3 | 9  | 295.62  | 6.84  |
| -1 | -3 | 10 | 1175.84 | 15.41 |
| -1 | -3 | 10 | 1174.73 | 15.82 |
| -1 | -3 | 10 | 1107.41 | 16.04 |

## CIF 31

|    |    |     |         |       |
|----|----|-----|---------|-------|
| -1 | -3 | 10  | 1188.45 | 15.35 |
| -1 | -3 | 10  | 1171.17 | 15.73 |
| -1 | -3 | 10  | 1250.52 | 16.34 |
| -1 | -3 | 11  | 186.94  | 5.32  |
| -1 | -3 | 11  | 196.49  | 5.94  |
| -1 | -3 | 11  | 215.02  | 6.00  |
| -1 | -3 | 11  | 191.72  | 6.08  |
| -1 | -3 | 11  | 181.57  | 5.35  |
| -1 | -3 | 11  | 204.50  | 5.84  |
| -1 | -3 | 11  | 227.63  | 5.62  |
| -1 | -3 | 12  | 518.01  | 9.19  |
| -1 | -3 | 12  | 525.04  | 9.82  |
| -1 | -3 | 12  | 550.92  | 9.90  |
| -1 | -3 | 12  | 496.71  | 9.18  |
| -1 | -3 | 12  | 486.65  | 9.06  |
| -1 | -3 | 12  | 497.93  | 10.23 |
| -1 | -3 | 12  | 518.12  | 9.64  |
| -1 | -3 | 13  | 121.14  | 4.44  |
| -1 | -3 | 13  | 105.12  | 3.96  |
| -1 | -3 | 13  | 126.99  | 4.20  |
| -1 | -3 | 13  | 105.77  | 3.63  |
| -1 | -3 | 13  | 107.83  | 3.89  |
| -1 | -3 | 14  | 114.49  | 3.91  |
| -1 | -3 | 14  | 109.16  | 3.51  |
| -1 | -3 | 14  | 118.05  | 3.57  |
| -1 | -3 | 14  | 113.41  | 3.71  |
| -1 | -3 | 14  | 108.14  | 3.42  |
| -1 | -3 | 15  | 1.43    | 0.69  |
| -1 | -3 | 15  | 1.56    | 0.70  |
| -1 | -2 | -13 | 123.15  | 3.27  |
| -1 | -2 | -13 | 120.87  | 3.14  |
| -1 | -2 | -13 | 122.28  | 2.77  |
| -1 | -2 | -12 | 24.63   | 2.03  |
| -1 | -2 | -12 | 26.54   | 1.60  |
| -1 | -2 | -12 | 27.25   | 1.92  |
| -1 | -2 | -12 | 27.13   | 1.66  |
| -1 | -2 | -12 | 25.55   | 1.47  |
| -1 | -2 | -11 | 330.70  | 8.55  |
| -1 | -2 | -11 | 338.44  | 7.98  |
| -1 | -2 | -11 | 368.58  | 7.57  |
| -1 | -2 | -11 | 355.27  | 6.69  |

## CIF 31

|    |    |     |        |      |
|----|----|-----|--------|------|
| -1 | -2 | -11 | 350.16 | 6.79 |
| -1 | -2 | -11 | 334.98 | 5.73 |
| -1 | -2 | -11 | 333.88 | 7.55 |
| -1 | -2 | -11 | 340.85 | 6.52 |
| -1 | -2 | -10 | 291.04 | 7.72 |
| -1 | -2 | -10 | 338.86 | 6.42 |
| -1 | -2 | -10 | 299.47 | 7.48 |
| -1 | -2 | -10 | 363.63 | 7.13 |
| -1 | -2 | -10 | 326.49 | 8.23 |
| -1 | -2 | -10 | 357.95 | 7.71 |
| -1 | -2 | -10 | 347.08 | 7.05 |
| -1 | -2 | -10 | 378.98 | 7.27 |
| -1 | -2 | -9  | 5.30   | 1.47 |
| -1 | -2 | -9  | 5.73   | 1.08 |
| -1 | -2 | -9  | 3.43   | 1.19 |
| -1 | -2 | -9  | 1.90   | 0.98 |
| -1 | -2 | -9  | 1.84   | 1.33 |
| -1 | -2 | -9  | 2.39   | 1.25 |
| -1 | -2 | -9  | 1.17   | 0.91 |
| -1 | -2 | -9  | 3.00   | 0.97 |
| -1 | -2 | -8  | 8.78   | 1.13 |
| -1 | -2 | -8  | 5.37   | 1.47 |
| -1 | -2 | -8  | 6.79   | 1.56 |
| -1 | -2 | -8  | 9.64   | 1.34 |
| -1 | -2 | -8  | 10.54  | 1.30 |
| -1 | -2 | -8  | 10.00  | 1.43 |
| -1 | -2 | -8  | 10.41  | 1.31 |
| -1 | -2 | -8  | 10.43  | 1.33 |
| -1 | -2 | -7  | 423.88 | 6.98 |
| -1 | -2 | -7  | 410.12 | 7.24 |
| -1 | -2 | -7  | 419.75 | 7.42 |
| -1 | -2 | -7  | 452.67 | 8.67 |
| -1 | -2 | -7  | 433.10 | 7.52 |
| -1 | -2 | -7  | 403.31 | 7.28 |
| -1 | -2 | -7  | 396.49 | 7.86 |
| -1 | -2 | -6  | 24.53  | 1.89 |
| -1 | -2 | -6  | 24.45  | 1.50 |
| -1 | -2 | -6  | 28.26  | 1.67 |
| -1 | -2 | -6  | 26.36  | 1.63 |
| -1 | -2 | -6  | 23.11  | 1.65 |
| -1 | -2 | -6  | 25.21  | 1.60 |

## CIF 31

|    |    |    |         |       |
|----|----|----|---------|-------|
| -1 | -2 | -6 | 26.13   | 1.38  |
| -1 | -2 | -6 | 23.13   | 2.18  |
| -1 | -2 | -6 | 24.14   | 1.56  |
| -1 | -2 | -5 | 40.58   | 1.83  |
| -1 | -2 | -5 | 42.38   | 1.66  |
| -1 | -2 | -5 | 36.14   | 1.99  |
| -1 | -2 | -5 | 37.83   | 1.88  |
| -1 | -2 | -4 | 35.23   | 1.46  |
| -1 | -2 | -3 | 1263.56 | 12.30 |
| -1 | -2 | -3 | 1233.12 | 12.56 |
| -1 | -2 | -2 | 1204.70 | 11.77 |
| -1 | -2 | -2 | 1231.73 | 12.02 |
| -1 | -2 | -2 | 1211.70 | 12.43 |
| -1 | -2 | -1 | 4544.40 | 38.42 |
| -1 | -2 | -1 | 4584.43 | 38.14 |
| -1 | -2 | 0  | 2.56    | 0.46  |
| -1 | -2 | 0  | 2.55    | 0.51  |
| -1 | -2 | 0  | 2.61    | 0.55  |
| -1 | -2 | 0  | 3.18    | 0.32  |
| -1 | -2 | 0  | 4.45    | 0.47  |
| -1 | -2 | 0  | 3.05    | 0.50  |
| -1 | -2 | 1  | 3191.13 | 28.29 |
| -1 | -2 | 1  | 3142.98 | 28.16 |
| -1 | -2 | 1  | 3438.24 | 29.18 |
| -1 | -2 | 1  | 3483.36 | 29.35 |
| -1 | -2 | 1  | 3732.30 | 29.10 |
| -1 | -2 | 1  | 3559.59 | 29.16 |
| -1 | -2 | 2  | 1213.91 | 11.18 |
| -1 | -2 | 2  | 1089.94 | 10.68 |
| -1 | -2 | 2  | 1104.27 | 10.55 |
| -1 | -2 | 2  | 1028.37 | 10.77 |
| -1 | -2 | 2  | 1207.94 | 10.74 |
| -1 | -2 | 2  | 1144.83 | 10.98 |
| -1 | -2 | 2  | 1125.60 | 9.83  |
| -1 | -2 | 2  | 1238.26 | 11.25 |
| -1 | -2 | 2  | 956.17  | 11.01 |
| -1 | -2 | 3  | 7273.86 | 57.11 |
| -1 | -2 | 3  | 7032.40 | 57.16 |
| -1 | -2 | 4  | 649.85  | 7.29  |
| -1 | -2 | 4  | 658.23  | 7.35  |
| -1 | -2 | 4  | 653.24  | 6.92  |

## CIF 31

|    |    |    |         |       |
|----|----|----|---------|-------|
| -1 | -2 | 4  | 644.76  | 7.27  |
| -1 | -2 | 4  | 651.63  | 6.90  |
| -1 | -2 | 4  | 647.68  | 7.63  |
| -1 | -2 | 5  | 4690.08 | 39.96 |
| -1 | -2 | 5  | 4539.78 | 39.30 |
| -1 | -2 | 5  | 4538.23 | 40.58 |
| -1 | -2 | 5  | 4673.96 | 39.37 |
| -1 | -2 | 5  | 4692.33 | 40.21 |
| -1 | -2 | 5  | 4729.73 | 39.82 |
| -1 | -2 | 5  | 4696.74 | 40.83 |
| -1 | -2 | 6  | 204.73  | 3.51  |
| -1 | -2 | 6  | 189.92  | 2.94  |
| -1 | -2 | 6  | 198.29  | 3.05  |
| -1 | -2 | 6  | 199.02  | 3.86  |
| -1 | -2 | 6  | 203.24  | 4.24  |
| -1 | -2 | 7  | 1075.19 | 12.98 |
| -1 | -2 | 7  | 985.96  | 11.74 |
| -1 | -2 | 7  | 1055.56 | 11.83 |
| -1 | -2 | 7  | 1007.28 | 12.47 |
| -1 | -2 | 7  | 1013.95 | 10.71 |
| -1 | -2 | 8  | 19.99   | 1.44  |
| -1 | -2 | 8  | 16.07   | 1.59  |
| -1 | -2 | 8  | 17.37   | 1.56  |
| -1 | -2 | 8  | 16.18   | 1.38  |
| -1 | -2 | 8  | 16.85   | 1.55  |
| -1 | -2 | 8  | 19.76   | 1.71  |
| -1 | -2 | 9  | 168.33  | 4.95  |
| -1 | -2 | 9  | 152.42  | 4.65  |
| -1 | -2 | 9  | 187.59  | 4.67  |
| -1 | -2 | 9  | 209.98  | 4.98  |
| -1 | -2 | 9  | 178.88  | 5.04  |
| -1 | -2 | 9  | 178.22  | 4.82  |
| -1 | -2 | 10 | 423.82  | 8.68  |
| -1 | -2 | 10 | 432.11  | 8.43  |
| -1 | -2 | 10 | 418.52  | 8.78  |
| -1 | -2 | 10 | 445.17  | 7.98  |
| -1 | -2 | 10 | 430.21  | 8.30  |
| -1 | -2 | 10 | 455.27  | 8.98  |
| -1 | -2 | 10 | 449.52  | 7.80  |
| -1 | -2 | 11 | 711.87  | 11.59 |
| -1 | -2 | 11 | 774.02  | 12.14 |



## CIF 31

|    |    |     |        |       |
|----|----|-----|--------|-------|
| -1 | -2 | 11  | 689.28 | 12.05 |
| -1 | -2 | 11  | 639.57 | 11.33 |
| -1 | -2 | 11  | 743.64 | 12.19 |
| -1 | -2 | 12  | 703.22 | 11.20 |
| -1 | -2 | 12  | 677.90 | 11.16 |
| -1 | -2 | 12  | 679.95 | 11.50 |
| -1 | -2 | 12  | 689.51 | 11.10 |
| -1 | -2 | 13  | 0.04   | 1.10  |
| -1 | -2 | 13  | 3.61   | 1.00  |
| -1 | -2 | 13  | -0.04  | 0.93  |
| -1 | -2 | 13  | 0.57   | 0.73  |
| -1 | -2 | 13  | 0.27   | 0.81  |
| -1 | -2 | 13  | 0.77   | 0.90  |
| -1 | -2 | 14  | 55.89  | 2.61  |
| -1 | -2 | 14  | 67.45  | 2.77  |
| -1 | -2 | 15  | 75.86  | 2.65  |
| -1 | -2 | 15  | 67.79  | 2.09  |
| -1 | -1 | -14 | 15.48  | 0.99  |
| -1 | -1 | -14 | 26.05  | 1.10  |
| -1 | -1 | -13 | 15.14  | 1.40  |
| -1 | -1 | -13 | 16.00  | 1.48  |
| -1 | -1 | -13 | 19.51  | 1.37  |
| -1 | -1 | -12 | 13.87  | 1.53  |
| -1 | -1 | -12 | 18.71  | 3.07  |
| -1 | -1 | -12 | 15.67  | 1.87  |
| -1 | -1 | -12 | 15.58  | 2.39  |
| -1 | -1 | -12 | 15.10  | 1.32  |
| -1 | -1 | -12 | 21.23  | 1.90  |
| -1 | -1 | -12 | 16.09  | 1.42  |
| -1 | -1 | -11 | 301.47 | 7.36  |
| -1 | -1 | -11 | 267.32 | 7.15  |
| -1 | -1 | -11 | 256.51 | 5.71  |
| -1 | -1 | -11 | 275.33 | 9.36  |
| -1 | -1 | -11 | 276.64 | 7.04  |
| -1 | -1 | -11 | 278.03 | 6.38  |
| -1 | -1 | -11 | 240.65 | 5.94  |
| -1 | -1 | -11 | 260.65 | 5.94  |
| -1 | -1 | -10 | 303.94 | 7.89  |
| -1 | -1 | -10 | 296.93 | 7.36  |
| -1 | -1 | -10 | 317.44 | 6.50  |
| -1 | -1 | -10 | 300.84 | 8.55  |

## CIF 31

|    |    |     |         |       |
|----|----|-----|---------|-------|
| -1 | -1 | -10 | 287.24  | 6.80  |
| -1 | -1 | -10 | 322.34  | 6.76  |
| -1 | -1 | -9  | 394.55  | 7.06  |
| -1 | -1 | -9  | 443.85  | 9.53  |
| -1 | -1 | -9  | 406.44  | 8.54  |
| -1 | -1 | -9  | 435.46  | 7.77  |
| -1 | -1 | -9  | 432.69  | 8.32  |
| -1 | -1 | -9  | 406.15  | 9.05  |
| -1 | -1 | -9  | 395.90  | 7.76  |
| -1 | -1 | -9  | 436.11  | 8.05  |
| -1 | -1 | -8  | 139.71  | 3.84  |
| -1 | -1 | -8  | 168.97  | 4.99  |
| -1 | -1 | -8  | 149.05  | 4.12  |
| -1 | -1 | -8  | 158.67  | 5.31  |
| -1 | -1 | -8  | 130.61  | 4.79  |
| -1 | -1 | -8  | 163.19  | 4.47  |
| -1 | -1 | -8  | 133.56  | 5.49  |
| -1 | -1 | -7  | 1574.51 | 18.14 |
| -1 | -1 | -7  | 1541.39 | 16.83 |
| -1 | -1 | -7  | 1599.40 | 17.16 |
| -1 | -1 | -7  | 1638.26 | 17.59 |
| -1 | -1 | -7  | 1506.05 | 19.29 |
| -1 | -1 | -7  | 1662.29 | 17.80 |
| -1 | -1 | -6  | 5.33    | 0.84  |
| -1 | -1 | -6  | 6.56    | 1.08  |
| -1 | -1 | -6  | 4.66    | 0.57  |
| -1 | -1 | -5  | 3115.63 | 27.48 |
| -1 | -1 | -4  | 293.07  | 4.01  |
| -1 | -1 | -3  | 985.34  | 9.71  |
| -1 | -1 | -2  | 401.00  | 4.46  |
| -1 | -1 | -2  | 355.63  | 4.17  |
| -1 | -1 | 0   | 3.59    | 0.25  |
| -1 | -1 | 0   | 3.36    | 0.42  |
| -1 | -1 | 0   | 3.11    | 0.23  |
| -1 | -1 | 0   | 3.37    | 0.43  |
| -1 | -1 | 0   | 3.38    | 0.35  |
| -1 | -1 | 0   | 3.13    | 0.40  |
| -1 | -1 | 1   | 521.49  | 5.54  |
| -1 | -1 | 1   | 532.04  | 5.54  |
| -1 | -1 | 3   | 6073.68 | 48.77 |
| -1 | -1 | 3   | 5535.09 | 48.85 |

## CIF 31

|    |    |    |         |       |
|----|----|----|---------|-------|
| -1 | -1 | 5  | 4022.13 | 32.64 |
| -1 | -1 | 5  | 3955.95 | 31.68 |
| -1 | -1 | 5  | 3888.31 | 34.01 |
| -1 | -1 | 5  | 4083.16 | 33.59 |
| -1 | -1 | 6  | 3162.30 | 27.73 |
| -1 | -1 | 6  | 3141.71 | 27.92 |
| -1 | -1 | 6  | 2928.67 | 27.05 |
| -1 | -1 | 6  | 2960.86 | 25.71 |
| -1 | -1 | 7  | 967.90  | 11.56 |
| -1 | -1 | 7  | 964.96  | 11.48 |
| -1 | -1 | 8  | 2134.30 | 22.57 |
| -1 | -1 | 8  | 2150.50 | 22.37 |
| -1 | -1 | 8  | 2219.95 | 22.51 |
| -1 | -1 | 8  | 1961.73 | 21.70 |
| -1 | -1 | 8  | 2329.79 | 23.47 |
| -1 | -1 | 8  | 1921.04 | 21.26 |
| -1 | -1 | 9  | 1031.97 | 14.04 |
| -1 | -1 | 9  | 1022.38 | 13.86 |
| -1 | -1 | 9  | 1032.40 | 12.44 |
| -1 | -1 | 10 | 292.63  | 6.38  |
| -1 | -1 | 10 | 294.20  | 6.00  |
| -1 | -1 | 10 | 278.75  | 6.48  |
| -1 | -1 | 10 | 283.13  | 7.04  |
| -1 | -1 | 11 | 91.97   | 3.50  |
| -1 | -1 | 11 | 109.09  | 3.87  |
| -1 | -1 | 11 | 102.68  | 4.15  |
| -1 | -1 | 11 | 107.66  | 3.92  |
| -1 | -1 | 11 | 86.03   | 3.61  |
| -1 | -1 | 11 | 91.28   | 4.05  |
| -1 | -1 | 12 | 58.13   | 2.71  |
| -1 | -1 | 12 | 56.15   | 3.05  |
| -1 | -1 | 12 | 60.13   | 3.03  |
| -1 | -1 | 12 | 61.52   | 3.02  |
| -1 | -1 | 12 | 56.48   | 3.22  |
| -1 | -1 | 13 | 39.67   | 2.40  |
| -1 | -1 | 13 | 34.36   | 2.09  |
| -1 | -1 | 13 | 44.00   | 2.46  |
| -1 | -1 | 13 | 45.05   | 2.37  |
| -1 | -1 | 13 | 38.94   | 2.56  |
| -1 | -1 | 14 | 23.64   | 1.82  |
| -1 | -1 | 14 | 20.43   | 1.48  |

## CIF 31

|    |    |     |        |       |
|----|----|-----|--------|-------|
| -1 | -1 | 15  | 21.74  | 1.22  |
| -1 | 0  | -14 | 11.09  | 1.08  |
| -1 | 0  | -13 | 370.19 | 6.94  |
| -1 | 0  | -13 | 363.68 | 7.22  |
| -1 | 0  | -13 | 384.30 | 6.34  |
| -1 | 0  | -13 | 367.76 | 7.20  |
| -1 | 0  | -12 | 20.75  | 2.04  |
| -1 | 0  | -12 | 20.92  | 2.06  |
| -1 | 0  | -12 | 19.95  | 1.94  |
| -1 | 0  | -12 | 19.78  | 1.43  |
| -1 | 0  | -12 | 18.72  | 1.72  |
| -1 | 0  | -12 | 17.92  | 5.74  |
| -1 | 0  | -12 | 19.16  | 1.61  |
| -1 | 0  | -11 | 673.01 | 12.06 |
| -1 | 0  | -11 | 662.78 | 11.78 |
| -1 | 0  | -11 | 693.79 | 10.01 |
| -1 | 0  | -11 | 671.99 | 12.33 |
| -1 | 0  | -11 | 664.69 | 10.82 |
| -1 | 0  | -10 | 225.33 | 5.29  |
| -1 | 0  | -10 | 232.67 | 6.70  |
| -1 | 0  | -10 | 222.15 | 6.32  |
| -1 | 0  | -10 | 227.82 | 6.42  |
| -1 | 0  | -10 | 221.38 | 5.76  |
| -1 | 0  | -9  | 64.58  | 3.49  |
| -1 | 0  | -9  | 75.53  | 2.89  |
| -1 | 0  | -9  | 75.09  | 3.43  |
| -1 | 0  | -9  | 71.18  | 4.64  |
| -1 | 0  | -9  | 65.14  | 3.25  |
| -1 | 0  | -9  | 63.34  | 2.89  |
| -1 | 0  | -9  | 76.07  | 5.83  |
| -1 | 0  | -8  | 218.75 | 5.92  |
| -1 | 0  | -8  | 225.26 | 6.55  |
| -1 | 0  | -8  | 282.44 | 6.28  |
| -1 | 0  | -8  | 252.47 | 6.43  |
| -1 | 0  | -8  | 221.60 | 4.85  |
| -1 | 0  | -8  | 227.22 | 5.64  |
| -1 | 0  | -8  | 222.85 | 5.35  |
| -1 | 0  | -8  | 261.38 | 6.46  |
| -1 | 0  | -8  | 242.53 | 5.38  |
| -1 | 0  | -7  | 306.67 | 6.15  |
| -1 | 0  | -7  | 305.60 | 6.71  |

## CIF 31

|    |   |    |         |       |
|----|---|----|---------|-------|
| -1 | 0 | -7 | 341.43  | 6.95  |
| -1 | 0 | -7 | 370.12  | 6.76  |
| -1 | 0 | -7 | 294.92  | 5.71  |
| -1 | 0 | -7 | 318.90  | 5.54  |
| -1 | 0 | -7 | 284.01  | 6.05  |
| -1 | 0 | -7 | 292.59  | 6.96  |
| -1 | 0 | -7 | 338.42  | 7.05  |
| -1 | 0 | -7 | 289.00  | 5.67  |
| -1 | 0 | -7 | 311.06  | 5.70  |
| -1 | 0 | -6 | 1806.86 | 19.81 |
| -1 | 0 | -5 | 545.70  | 5.77  |
| -1 | 0 | -4 | 1135.74 | 10.45 |
| -1 | 0 | -3 | 21.24   | 0.75  |
| -1 | 0 | -3 | 19.61   | 0.67  |
| -1 | 0 | -2 | 2111.50 | 18.36 |
| -1 | 0 | -2 | 2281.23 | 18.55 |
| -1 | 0 | -1 | 22.39   | 0.43  |
| -1 | 0 | -1 | 36.53   | 0.75  |
| -1 | 0 | 0  | 516.00  | 4.93  |
| -1 | 0 | 0  | 557.58  | 5.05  |
| -1 | 0 | 1  | 0.56    | 0.18  |
| -1 | 0 | 1  | 0.41    | 0.07  |
| -1 | 0 | 2  | 2825.41 | 23.32 |
| -1 | 0 | 2  | 2725.36 | 22.92 |
| -1 | 0 | 3  | 2293.32 | 19.82 |
| -1 | 0 | 3  | 2270.33 | 19.86 |
| -1 | 0 | 3  | 2333.68 | 19.59 |
| -1 | 0 | 4  | 5520.52 | 44.07 |
| -1 | 0 | 4  | 5843.75 | 44.18 |
| -1 | 0 | 5  | 37.52   | 1.48  |
| -1 | 0 | 5  | 37.40   | 1.47  |
| -1 | 0 | 5  | 35.37   | 1.17  |
| -1 | 0 | 5  | 34.75   | 0.71  |
| -1 | 0 | 6  | 2370.77 | 22.12 |
| -1 | 0 | 6  | 2354.01 | 22.08 |
| -1 | 0 | 6  | 2380.96 | 20.75 |
| -1 | 0 | 7  | 1068.11 | 12.62 |
| -1 | 0 | 7  | 977.55  | 12.24 |
| -1 | 0 | 7  | 1118.87 | 13.47 |
| -1 | 0 | 7  | 973.59  | 12.32 |
| -1 | 0 | 7  | 1025.65 | 11.58 |

## CIF 31

|    |   |     |        |       |
|----|---|-----|--------|-------|
| -1 | 0 | 8   | 227.25 | 5.09  |
| -1 | 0 | 8   | 223.76 | 5.22  |
| -1 | 0 | 8   | 258.57 | 5.88  |
| -1 | 0 | 8   | 266.75 | 5.49  |
| -1 | 0 | 8   | 269.20 | 5.06  |
| -1 | 0 | 9   | 112.65 | 3.60  |
| -1 | 0 | 9   | 101.71 | 3.44  |
| -1 | 0 | 9   | 93.07  | 3.48  |
| -1 | 0 | 9   | 111.61 | 4.06  |
| -1 | 0 | 9   | 94.19  | 3.49  |
| -1 | 0 | 9   | 118.17 | 3.54  |
| -1 | 0 | 10  | 572.27 | 9.05  |
| -1 | 0 | 10  | 572.57 | 9.79  |
| -1 | 0 | 10  | 575.75 | 9.42  |
| -1 | 0 | 10  | 544.16 | 10.58 |
| -1 | 0 | 10  | 562.98 | 9.21  |
| -1 | 0 | 11  | 4.39   | 1.03  |
| -1 | 0 | 11  | 2.31   | 0.95  |
| -1 | 0 | 11  | 1.35   | 1.02  |
| -1 | 0 | 11  | 1.70   | 1.23  |
| -1 | 0 | 12  | 99.19  | 3.69  |
| -1 | 0 | 12  | 90.02  | 3.76  |
| -1 | 0 | 12  | 98.26  | 4.32  |
| -1 | 0 | 13  | 261.00 | 6.31  |
| -1 | 0 | 13  | 288.62 | 6.06  |
| -1 | 0 | 13  | 294.14 | 6.21  |
| -1 | 0 | 13  | 261.37 | 6.67  |
| -1 | 0 | 14  | 85.22  | 3.17  |
| -1 | 1 | -14 | 25.52  | 2.02  |
| -1 | 1 | -14 | 27.02  | 1.72  |
| -1 | 1 | -14 | 20.42  | 1.87  |
| -1 | 1 | -14 | 22.50  | 1.41  |
| -1 | 1 | -14 | 20.63  | 1.21  |
| -1 | 1 | -13 | 20.58  | 1.93  |
| -1 | 1 | -13 | 22.26  | 1.70  |
| -1 | 1 | -13 | 33.30  | 1.98  |
| -1 | 1 | -13 | 22.93  | 1.94  |
| -1 | 1 | -13 | 29.20  | 1.85  |
| -1 | 1 | -13 | 26.70  | 1.72  |
| -1 | 1 | -12 | 111.69 | 4.18  |
| -1 | 1 | -12 | 110.60 | 4.35  |

## CIF 31

|    |   |     |         |       |
|----|---|-----|---------|-------|
| -1 | 1 | -12 | 110.63  | 5.77  |
| -1 | 1 | -12 | 114.44  | 3.93  |
| -1 | 1 | -12 | 122.56  | 4.02  |
| -1 | 1 | -12 | 104.53  | 3.72  |
| -1 | 1 | -11 | 504.87  | 10.19 |
| -1 | 1 | -11 | 492.34  | 9.91  |
| -1 | 1 | -10 | 199.12  | 6.15  |
| -1 | 1 | -10 | 211.28  | 6.20  |
| -1 | 1 | -10 | 200.69  | 5.92  |
| -1 | 1 | -10 | 187.48  | 4.52  |
| -1 | 1 | -10 | 197.05  | 5.58  |
| -1 | 1 | -10 | 212.51  | 5.43  |
| -1 | 1 | -9  | 2308.51 | 27.94 |
| -1 | 1 | -9  | 2643.97 | 28.74 |
| -1 | 1 | -9  | 2517.18 | 27.91 |
| -1 | 1 | -9  | 2449.76 | 27.44 |
| -1 | 1 | -9  | 2520.92 | 26.92 |
| -1 | 1 | -9  | 2406.36 | 25.72 |
| -1 | 1 | -9  | 2635.33 | 24.94 |
| -1 | 1 | -9  | 2419.89 | 26.72 |
| -1 | 1 | -9  | 2362.17 | 25.71 |
| -1 | 1 | -9  | 2472.20 | 27.14 |
| -1 | 1 | -8  | 543.22  | 9.16  |
| -1 | 1 | -8  | 631.68  | 10.43 |
| -1 | 1 | -8  | 523.80  | 10.20 |
| -1 | 1 | -8  | 589.58  | 10.41 |
| -1 | 1 | -8  | 534.74  | 8.45  |
| -1 | 1 | -8  | 547.31  | 7.82  |
| -1 | 1 | -8  | 620.67  | 9.82  |
| -1 | 1 | -8  | 552.23  | 10.81 |
| -1 | 1 | -8  | 559.08  | 9.80  |
| -1 | 1 | -8  | 537.30  | 8.96  |
| -1 | 1 | -8  | 535.69  | 8.78  |
| -1 | 1 | -8  | 526.61  | 8.39  |
| -1 | 1 | -7  | 786.90  | 11.59 |
| -1 | 1 | -7  | 727.34  | 10.20 |
| -1 | 1 | -7  | 809.17  | 11.25 |
| -1 | 1 | -7  | 743.49  | 10.56 |
| -1 | 1 | -7  | 781.75  | 11.35 |
| -1 | 1 | -7  | 730.41  | 9.73  |
| -1 | 1 | -7  | 707.52  | 10.06 |

## CIF 31

|    |   |    |         |       |
|----|---|----|---------|-------|
| -1 | 1 | -7 | 735.41  | 11.65 |
| -1 | 1 | -7 | 710.52  | 11.84 |
| -1 | 1 | -7 | 745.53  | 9.75  |
| -1 | 1 | -7 | 710.62  | 9.95  |
| -1 | 1 | -6 | 1863.07 | 20.24 |
| -1 | 1 | -6 | 1855.73 | 19.39 |
| -1 | 1 | -5 | 429.38  | 5.71  |
| -1 | 1 | -4 | 305.44  | 4.16  |
| -1 | 1 | -3 | 1175.00 | 10.81 |
| -1 | 1 | -3 | 1140.33 | 10.09 |
| -1 | 1 | -2 | 211.70  | 2.59  |
| -1 | 1 | -2 | 207.53  | 2.54  |
| -1 | 1 | -1 | 98.38   | 1.38  |
| -1 | 1 | -1 | 85.67   | 1.29  |
| -1 | 1 | -1 | 91.41   | 1.51  |
| -1 | 1 | -1 | 101.33  | 1.50  |
| -1 | 1 | 1  | 69.43   | 1.11  |
| -1 | 1 | 1  | 69.04   | 1.11  |
| -1 | 1 | 2  | 1022.39 | 9.16  |
| -1 | 1 | 2  | 997.54  | 9.09  |
| -1 | 1 | 2  | 1009.56 | 9.05  |
| -1 | 1 | 3  | 6080.67 | 50.20 |
| -1 | 1 | 3  | 6484.43 | 50.91 |
| -1 | 1 | 4  | 68.18   | 1.75  |
| -1 | 1 | 4  | 65.73   | 1.79  |
| -1 | 1 | 4  | 75.93   | 1.88  |
| -1 | 1 | 4  | 81.58   | 1.85  |
| -1 | 1 | 4  | 80.47   | 1.36  |
| -1 | 1 | 4  | 74.99   | 1.97  |
| -1 | 1 | 5  | 611.90  | 7.59  |
| -1 | 1 | 5  | 584.16  | 7.67  |
| -1 | 1 | 5  | 629.84  | 7.82  |
| -1 | 1 | 5  | 702.21  | 7.82  |
| -1 | 1 | 5  | 718.75  | 6.69  |
| -1 | 1 | 5  | 668.46  | 7.97  |
| -1 | 1 | 6  | 109.20  | 2.70  |
| -1 | 1 | 6  | 106.68  | 2.85  |
| -1 | 1 | 6  | 113.36  | 2.94  |
| -1 | 1 | 6  | 112.64  | 2.85  |
| -1 | 1 | 7  | 15.35   | 1.19  |
| -1 | 1 | 7  | 13.53   | 1.07  |



## CIF 31

|    |   |     |         |       |
|----|---|-----|---------|-------|
| -1 | 1 | 7   | 15.47   | 1.23  |
| -1 | 1 | 7   | 11.18   | 1.12  |
| -1 | 1 | 7   | 15.10   | 1.15  |
| -1 | 1 | 7   | 12.70   | 1.05  |
| -1 | 1 | 8   | 293.51  | 5.27  |
| -1 | 1 | 8   | 272.94  | 5.72  |
| -1 | 1 | 8   | 276.79  | 5.63  |
| -1 | 1 | 8   | 295.48  | 5.68  |
| -1 | 1 | 8   | 306.11  | 5.78  |
| -1 | 1 | 9   | 1222.37 | 14.01 |
| -1 | 1 | 9   | 1269.01 | 14.86 |
| -1 | 1 | 9   | 1261.24 | 15.21 |
| -1 | 1 | 9   | 1236.67 | 15.15 |
| -1 | 1 | 10  | 27.99   | 1.92  |
| -1 | 1 | 10  | 22.38   | 2.19  |
| -1 | 1 | 10  | 28.58   | 2.00  |
| -1 | 1 | 10  | 27.81   | 1.94  |
| -1 | 1 | 11  | 109.85  | 4.52  |
| -1 | 1 | 11  | 115.69  | 3.97  |
| -1 | 1 | 11  | 103.93  | 4.66  |
| -1 | 1 | 12  | 479.40  | 8.17  |
| -1 | 1 | 12  | 423.57  | 8.93  |
| -1 | 1 | 12  | 467.85  | 8.42  |
| -1 | 1 | 12  | 398.77  | 9.17  |
| -1 | 1 | 13  | 189.10  | 5.24  |
| -1 | 1 | 13  | 200.54  | 5.64  |
| -1 | 1 | 14  | 42.97   | 1.84  |
| -1 | 2 | -15 | 2.64    | 0.56  |
| -1 | 2 | -15 | 5.57    | 0.60  |
| -1 | 2 | -14 | 15.33   | 1.49  |
| -1 | 2 | -14 | 14.89   | 1.51  |
| -1 | 2 | -14 | 18.59   | 1.32  |
| -1 | 2 | -14 | 16.36   | 1.27  |
| -1 | 2 | -14 | 19.34   | 1.28  |
| -1 | 2 | -13 | -0.94   | 4.16  |
| -1 | 2 | -13 | 1.60    | 1.00  |
| -1 | 2 | -13 | 1.68    | 0.84  |
| -1 | 2 | -13 | 1.34    | 0.78  |
| -1 | 2 | -13 | 1.61    | 0.82  |
| -1 | 2 | -12 | 182.37  | 5.66  |
| -1 | 2 | -12 | 184.27  | 5.05  |

## CIF 31

|    |   |     |         |       |
|----|---|-----|---------|-------|
| -1 | 2 | -11 | 123.20  | 5.02  |
| -1 | 2 | -11 | 119.86  | 4.38  |
| -1 | 2 | -11 | 133.07  | 4.94  |
| -1 | 2 | -11 | 116.44  | 4.01  |
| -1 | 2 | -11 | 109.17  | 4.15  |
| -1 | 2 | -11 | 109.21  | 4.01  |
| -1 | 2 | -10 | 796.71  | 13.40 |
| -1 | 2 | -10 | 714.12  | 13.20 |
| -1 | 2 | -10 | 780.78  | 12.30 |
| -1 | 2 | -10 | 782.41  | 13.12 |
| -1 | 2 | -10 | 674.91  | 10.89 |
| -1 | 2 | -10 | 717.09  | 11.69 |
| -1 | 2 | -10 | 786.46  | 12.74 |
| -1 | 2 | -10 | 733.27  | 11.29 |
| -1 | 2 | -9  | 2.60    | 1.85  |
| -1 | 2 | -9  | 1.80    | 1.04  |
| -1 | 2 | -9  | 3.41    | 1.11  |
| -1 | 2 | -9  | 5.42    | 1.15  |
| -1 | 2 | -9  | 2.58    | 3.71  |
| -1 | 2 | -9  | 2.64    | 1.15  |
| -1 | 2 | -9  | 5.00    | 1.08  |
| -1 | 2 | -9  | 1.15    | 1.08  |
| -1 | 2 | -9  | 5.67    | 1.20  |
| -1 | 2 | -9  | 4.08    | 1.04  |
| -1 | 2 | -9  | 3.08    | 3.25  |
| -1 | 2 | -8  | 2983.33 | 29.94 |
| -1 | 2 | -8  | 2900.41 | 28.29 |
| -1 | 2 | -8  | 3124.03 | 31.84 |
| -1 | 2 | -8  | 3162.08 | 30.48 |
| -1 | 2 | -8  | 3195.17 | 30.88 |
| -1 | 2 | -8  | 2970.65 | 32.61 |
| -1 | 2 | -8  | 2855.44 | 32.85 |
| -1 | 2 | -8  | 2691.17 | 28.50 |
| -1 | 2 | -8  | 2797.05 | 29.52 |
| -1 | 2 | -8  | 3023.71 | 29.75 |
| -1 | 2 | -8  | 3042.69 | 29.16 |
| -1 | 2 | -8  | 2736.27 | 29.10 |
| -1 | 2 | -8  | 3177.73 | 32.70 |
| -1 | 2 | -7  | 18.50   | 1.53  |
| -1 | 2 | -7  | 19.63   | 1.92  |
| -1 | 2 | -7  | 26.21   | 2.05  |

## CIF 31

|    |   |    |         |       |
|----|---|----|---------|-------|
| -1 | 2 | -7 | 26.14   | 1.90  |
| -1 | 2 | -7 | 27.32   | 1.78  |
| -1 | 2 | -7 | 28.04   | 1.79  |
| -1 | 2 | -7 | 22.47   | 2.06  |
| -1 | 2 | -7 | 20.91   | 1.38  |
| -1 | 2 | -7 | 23.49   | 1.82  |
| -1 | 2 | -7 | 16.19   | 1.41  |
| -1 | 2 | -7 | 20.43   | 1.61  |
| -1 | 2 | -7 | 21.86   | 1.57  |
| -1 | 2 | -6 | 21.33   | 1.81  |
| -1 | 2 | -6 | 22.30   | 1.35  |
| -1 | 2 | -6 | 22.19   | 1.40  |
| -1 | 2 | -6 | 18.95   | 1.52  |
| -1 | 2 | -5 | 252.73  | 4.65  |
| -1 | 2 | -5 | 259.70  | 4.82  |
| -1 | 2 | -5 | 260.83  | 4.23  |
| -1 | 2 | -5 | 255.47  | 3.00  |
| -1 | 2 | -4 | 1496.84 | 14.71 |
| -1 | 2 | -4 | 1488.15 | 14.79 |
| -1 | 2 | -3 | 1.68    | 0.35  |
| -1 | 2 | -3 | 0.85    | 0.35  |
| -1 | 2 | -3 | 0.88    | 0.47  |
| -1 | 2 | -3 | 1.92    | 0.40  |
| -1 | 2 | -2 | 4125.03 | 33.90 |
| -1 | 2 | -2 | 4101.86 | 34.67 |
| -1 | 2 | -2 | 4131.31 | 34.34 |
| -1 | 2 | 0  | 25.95   | 0.75  |
| -1 | 2 | 0  | 24.55   | 0.73  |
| -1 | 2 | 0  | 26.89   | 0.57  |
| -1 | 2 | 1  | 677.33  | 6.17  |
| -1 | 2 | 1  | 669.35  | 7.10  |
| -1 | 2 | 2  | 40.68   | 0.90  |
| -1 | 2 | 2  | 42.96   | 1.09  |
| -1 | 2 | 2  | 40.63   | 1.34  |
| -1 | 2 | 2  | 39.50   | 1.30  |
| -1 | 2 | 3  | 7162.14 | 60.85 |
| -1 | 2 | 3  | 7326.47 | 61.54 |
| -1 | 2 | 4  | 7.01    | 0.49  |
| -1 | 2 | 4  | 7.99    | 0.60  |
| -1 | 2 | 4  | 7.16    | 0.64  |
| -1 | 2 | 4  | 6.64    | 0.51  |

## CIF 31

|    |   |     |         |       |
|----|---|-----|---------|-------|
| -1 | 2 | 4   | 7.07    | 0.79  |
| -1 | 2 | 4   | 6.68    | 0.66  |
| -1 | 2 | 4   | 7.39    | 0.72  |
| -1 | 2 | 5   | 3124.44 | 25.43 |
| -1 | 2 | 5   | 3240.34 | 25.94 |
| -1 | 2 | 5   | 2993.51 | 26.04 |
| -1 | 2 | 5   | 3168.26 | 26.38 |
| -1 | 2 | 5   | 2919.02 | 27.08 |
| -1 | 2 | 5   | 3319.96 | 27.03 |
| -1 | 2 | 5   | 2863.30 | 27.44 |
| -1 | 2 | 6   | 269.46  | 4.03  |
| -1 | 2 | 6   | 272.05  | 4.73  |
| -1 | 2 | 6   | 258.96  | 4.84  |
| -1 | 2 | 6   | 281.47  | 4.41  |
| -1 | 2 | 6   | 280.24  | 4.95  |
| -1 | 2 | 6   | 262.17  | 5.25  |
| -1 | 2 | 7   | 601.32  | 8.34  |
| -1 | 2 | 7   | 593.68  | 8.71  |
| -1 | 2 | 7   | 579.62  | 8.92  |
| -1 | 2 | 8   | 875.27  | 11.41 |
| -1 | 2 | 8   | 903.15  | 11.89 |
| -1 | 2 | 9   | 94.42   | 3.72  |
| -1 | 2 | 9   | 102.66  | 3.36  |
| -1 | 2 | 9   | 101.44  | 3.53  |
| -1 | 2 | 10  | 195.62  | 5.63  |
| -1 | 2 | 10  | 197.45  | 5.01  |
| -1 | 2 | 10  | 202.17  | 6.46  |
| -1 | 2 | 11  | 476.06  | 8.05  |
| -1 | 2 | 11  | 467.64  | 8.46  |
| -1 | 2 | 12  | 110.74  | 4.38  |
| -1 | 2 | 12  | 115.98  | 4.65  |
| -1 | 2 | 13  | 83.17   | 2.83  |
| -1 | 2 | 13  | 87.28   | 3.52  |
| -1 | 2 | 14  | 250.94  | 4.39  |
| -1 | 3 | -15 | 57.89   | 2.05  |
| -1 | 3 | -15 | 54.36   | 1.48  |
| -1 | 3 | -14 | 6.47    | 1.14  |
| -1 | 3 | -14 | 8.46    | 0.98  |
| -1 | 3 | -14 | 9.39    | 1.04  |
| -1 | 3 | -14 | 8.88    | 1.03  |
| -1 | 3 | -13 | 66.14   | 2.69  |

## CIF 31

|    |   |     |        |       |
|----|---|-----|--------|-------|
| -1 | 3 | -13 | 61.97  | 2.71  |
| -1 | 3 | -12 | 142.79 | 5.27  |
| -1 | 3 | -12 | 144.21 | 4.35  |
| -1 | 3 | -12 | 133.09 | 5.16  |
| -1 | 3 | -12 | 159.19 | 4.72  |
| -1 | 3 | -12 | 157.57 | 4.69  |
| -1 | 3 | -11 | 540.92 | 9.40  |
| -1 | 3 | -11 | 532.17 | 11.68 |
| -1 | 3 | -11 | 575.39 | 11.44 |
| -1 | 3 | -11 | 553.89 | 11.01 |
| -1 | 3 | -11 | 525.60 | 9.55  |
| -1 | 3 | -11 | 612.90 | 10.04 |
| -1 | 3 | -11 | 616.98 | 9.52  |
| -1 | 3 | -10 | 253.89 | 6.21  |
| -1 | 3 | -10 | 261.36 | 6.97  |
| -1 | 3 | -10 | 254.89 | 7.85  |
| -1 | 3 | -10 | 285.17 | 7.64  |
| -1 | 3 | -10 | 260.70 | 5.97  |
| -1 | 3 | -10 | 263.22 | 6.26  |
| -1 | 3 | -10 | 252.22 | 8.36  |
| -1 | 3 | -10 | 295.07 | 6.50  |
| -1 | 3 | -9  | 9.06   | 1.38  |
| -1 | 3 | -9  | 3.51   | 3.58  |
| -1 | 3 | -9  | 12.04  | 1.71  |
| -1 | 3 | -9  | 11.00  | 1.34  |
| -1 | 3 | -9  | 4.57   | 1.44  |
| -1 | 3 | -9  | 7.49   | 2.20  |
| -1 | 3 | -9  | 6.10   | 1.44  |
| -1 | 3 | -9  | 10.31  | 1.38  |
| -1 | 3 | -9  | 8.57   | 1.25  |
| -1 | 3 | -9  | 6.72   | 1.39  |
| -1 | 3 | -9  | 7.40   | 3.79  |
| -1 | 3 | -9  | 3.72   | 1.30  |
| -1 | 3 | -8  | 98.35  | 3.69  |
| -1 | 3 | -8  | 98.23  | 4.04  |
| -1 | 3 | -8  | 102.51 | 3.35  |
| -1 | 3 | -8  | 120.91 | 4.88  |
| -1 | 3 | -8  | 108.08 | 4.45  |
| -1 | 3 | -8  | 106.42 | 3.83  |
| -1 | 3 | -8  | 113.54 | 3.36  |
| -1 | 3 | -8  | 116.26 | 3.67  |

## CIF 31

|    |   |    |         |       |
|----|---|----|---------|-------|
| -1 | 3 | -8 | 99.54   | 3.85  |
| -1 | 3 | -8 | 98.39   | 4.05  |
| -1 | 3 | -8 | 99.38   | 3.39  |
| -1 | 3 | -7 | 274.23  | 5.41  |
| -1 | 3 | -7 | 278.67  | 5.27  |
| -1 | 3 | -7 | 249.18  | 6.64  |
| -1 | 3 | -7 | 269.33  | 6.35  |
| -1 | 3 | -7 | 271.31  | 5.42  |
| -1 | 3 | -7 | 285.00  | 5.19  |
| -1 | 3 | -7 | 280.13  | 6.77  |
| -1 | 3 | -7 | 259.20  | 5.62  |
| -1 | 3 | -7 | 267.24  | 5.82  |
| -1 | 3 | -7 | 264.59  | 5.22  |
| -1 | 3 | -6 | 21.45   | 1.49  |
| -1 | 3 | -6 | 17.35   | 1.54  |
| -1 | 3 | -6 | 19.15   | 1.41  |
| -1 | 3 | -6 | 15.70   | 1.55  |
| -1 | 3 | -6 | 17.40   | 1.68  |
| -1 | 3 | -6 | 17.83   | 1.33  |
| -1 | 3 | -6 | 24.29   | 1.69  |
| -1 | 3 | -6 | 15.71   | 0.79  |
| -1 | 3 | -5 | 74.26   | 2.60  |
| -1 | 3 | -5 | 69.30   | 2.17  |
| -1 | 3 | -5 | 68.00   | 1.96  |
| -1 | 3 | -4 | 1081.83 | 10.03 |
| -1 | 3 | -4 | 1070.65 | 12.30 |
| -1 | 3 | -4 | 1123.12 | 11.23 |
| -1 | 3 | -4 | 1040.96 | 12.20 |
| -1 | 3 | -4 | 1093.43 | 10.75 |
| -1 | 3 | -4 | 1071.51 | 12.34 |
| -1 | 3 | -4 | 1065.38 | 11.25 |
| -1 | 3 | -4 | 1009.13 | 11.47 |
| -1 | 3 | -4 | 1080.60 | 10.95 |
| -1 | 3 | -3 | 2559.33 | 22.23 |
| -1 | 3 | -3 | 2657.05 | 24.48 |
| -1 | 3 | -3 | 2704.06 | 23.73 |
| -1 | 3 | -3 | 2776.51 | 23.49 |
| -1 | 3 | -3 | 2811.07 | 24.94 |
| -1 | 3 | -3 | 2439.19 | 22.85 |
| -1 | 3 | -3 | 2808.91 | 24.93 |
| -1 | 3 | -3 | 2643.61 | 23.46 |

## CIF 31

|    |   |    |         |       |
|----|---|----|---------|-------|
| -1 | 3 | -3 | 2674.27 | 23.75 |
| -1 | 3 | -2 | 1080.41 | 11.20 |
| -1 | 3 | -2 | 955.88  | 9.24  |
| -1 | 3 | -2 | 1137.52 | 10.60 |
| -1 | 3 | -2 | 1197.17 | 10.34 |
| -1 | 3 | -2 | 1039.24 | 9.77  |
| -1 | 3 | -2 | 1063.32 | 11.63 |
| -1 | 3 | -2 | 1120.27 | 11.00 |
| -1 | 3 | -1 | 1186.07 | 11.39 |
| -1 | 3 | -1 | 1054.52 | 10.83 |
| -1 | 3 | -1 | 1068.03 | 10.12 |
| -1 | 3 | -1 | 1038.54 | 10.32 |
| -1 | 3 | -1 | 1064.59 | 9.78  |
| -1 | 3 | -1 | 1127.20 | 10.27 |
| -1 | 3 | -1 | 1225.72 | 11.41 |
| -1 | 3 | -1 | 1020.75 | 11.65 |
| -1 | 3 | -1 | 970.09  | 10.37 |
| -1 | 3 | -1 | 1076.25 | 10.62 |
| -1 | 3 | 0  | 3645.51 | 30.59 |
| -1 | 3 | 0  | 3653.50 | 31.70 |
| -1 | 3 | 0  | 3586.86 | 31.73 |
| -1 | 3 | 0  | 3610.99 | 30.01 |
| -1 | 3 | 2  | 16.34   | 0.85  |
| -1 | 3 | 2  | 15.78   | 0.72  |
| -1 | 3 | 2  | 12.77   | 0.97  |
| -1 | 3 | 2  | 14.10   | 0.81  |
| -1 | 3 | 3  | 2342.60 | 20.06 |
| -1 | 3 | 3  | 2326.46 | 21.06 |
| -1 | 3 | 3  | 2362.03 | 22.37 |
| -1 | 3 | 4  | 412.92  | 6.32  |
| -1 | 3 | 4  | 413.06  | 4.57  |
| -1 | 3 | 4  | 445.12  | 5.57  |
| -1 | 3 | 4  | 449.73  | 6.96  |
| -1 | 3 | 4  | 395.97  | 5.61  |
| -1 | 3 | 4  | 488.30  | 6.16  |
| -1 | 3 | 5  | 5214.84 | 41.24 |
| -1 | 3 | 5  | 5215.33 | 43.59 |
| -1 | 3 | 5  | 5091.32 | 42.36 |
| -1 | 3 | 6  | 374.14  | 6.91  |
| -1 | 3 | 6  | 369.14  | 7.24  |
| -1 | 3 | 7  | 601.45  | 8.15  |

## CIF 31

|    |   |     |        |       |
|----|---|-----|--------|-------|
| -1 | 3 | 7   | 526.94 | 8.68  |
| -1 | 3 | 7   | 598.02 | 8.75  |
| -1 | 3 | 7   | 510.21 | 9.25  |
| -1 | 3 | 8   | 124.34 | 3.50  |
| -1 | 3 | 8   | 132.74 | 3.93  |
| -1 | 3 | 9   | 74.15  | 3.61  |
| -1 | 3 | 9   | 83.09  | 2.92  |
| -1 | 3 | 9   | 80.25  | 3.38  |
| -1 | 3 | 10  | 25.63  | 2.13  |
| -1 | 3 | 10  | 25.91  | 2.59  |
| -1 | 3 | 10  | 26.34  | 1.95  |
| -1 | 3 | 11  | 719.84 | 10.72 |
| -1 | 3 | 11  | 662.81 | 11.04 |
| -1 | 3 | 11  | 672.19 | 12.49 |
| -1 | 3 | 11  | 718.92 | 10.84 |
| -1 | 3 | 12  | 91.75  | 3.84  |
| -1 | 3 | 12  | 89.98  | 3.91  |
| -1 | 3 | 13  | 11.19  | 1.04  |
| -1 | 4 | -15 | 51.23  | 1.40  |
| -1 | 4 | -15 | 51.05  | 1.54  |
| -1 | 4 | -14 | 21.34  | 1.74  |
| -1 | 4 | -14 | 23.50  | 1.40  |
| -1 | 4 | -14 | 21.53  | 1.41  |
| -1 | 4 | -14 | 20.84  | 1.45  |
| -1 | 4 | -13 | 13.17  | 1.74  |
| -1 | 4 | -13 | 13.98  | 1.77  |
| -1 | 4 | -13 | 11.78  | 2.26  |
| -1 | 4 | -13 | 10.94  | 1.36  |
| -1 | 4 | -12 | 723.57 | 14.26 |
| -1 | 4 | -12 | 758.83 | 13.53 |
| -1 | 4 | -12 | 821.16 | 11.78 |
| -1 | 4 | -12 | 837.73 | 11.59 |
| -1 | 4 | -12 | 752.78 | 13.04 |
| -1 | 4 | -12 | 765.41 | 11.76 |
| -1 | 4 | -11 | 491.01 | 11.58 |
| -1 | 4 | -11 | 555.11 | 10.76 |
| -1 | 4 | -11 | 450.80 | 8.53  |
| -1 | 4 | -11 | 521.18 | 10.95 |
| -1 | 4 | -11 | 435.23 | 8.36  |
| -1 | 4 | -11 | 461.39 | 8.71  |
| -1 | 4 | -11 | 481.13 | 9.01  |



## CIF 31

|    |   |     |         |       |
|----|---|-----|---------|-------|
| -1 | 4 | -10 | 687.57  | 13.24 |
| -1 | 4 | -10 | 754.72  | 11.12 |
| -1 | 4 | -10 | 773.14  | 13.20 |
| -1 | 4 | -10 | 653.97  | 10.75 |
| -1 | 4 | -10 | 816.94  | 11.92 |
| -1 | 4 | -10 | 681.52  | 13.88 |
| -1 | 4 | -10 | 761.80  | 11.60 |
| -1 | 4 | -9  | 71.75   | 3.84  |
| -1 | 4 | -9  | 68.79   | 3.77  |
| -1 | 4 | -9  | 67.16   | 4.06  |
| -1 | 4 | -9  | 75.46   | 4.13  |
| -1 | 4 | -9  | 79.48   | 3.65  |
| -1 | 4 | -9  | 66.53   | 2.84  |
| -1 | 4 | -9  | 70.76   | 3.06  |
| -1 | 4 | -9  | 73.40   | 4.87  |
| -1 | 4 | -8  | 263.86  | 5.80  |
| -1 | 4 | -8  | 280.49  | 7.51  |
| -1 | 4 | -8  | 270.69  | 6.45  |
| -1 | 4 | -8  | 256.64  | 6.33  |
| -1 | 4 | -8  | 267.09  | 6.42  |
| -1 | 4 | -8  | 264.32  | 6.91  |
| -1 | 4 | -8  | 270.07  | 5.46  |
| -1 | 4 | -8  | 240.00  | 6.05  |
| -1 | 4 | -8  | 269.39  | 6.02  |
| -1 | 4 | -8  | 241.65  | 5.41  |
| -1 | 4 | -8  | 247.05  | 5.90  |
| -1 | 4 | -7  | 971.80  | 12.53 |
| -1 | 4 | -7  | 1157.13 | 15.89 |
| -1 | 4 | -7  | 1109.74 | 13.20 |
| -1 | 4 | -7  | 1066.39 | 14.83 |
| -1 | 4 | -7  | 1193.02 | 14.61 |
| -1 | 4 | -7  | 1031.58 | 14.18 |
| -1 | 4 | -7  | 1042.67 | 12.67 |
| -1 | 4 | -7  | 1066.71 | 13.53 |
| -1 | 4 | -7  | 1102.19 | 14.76 |
| -1 | 4 | -7  | 1068.65 | 13.41 |
| -1 | 4 | -7  | 1117.33 | 15.32 |
| -1 | 4 | -7  | 1020.05 | 12.68 |
| -1 | 4 | -6  | 162.58  | 4.35  |
| -1 | 4 | -6  | 149.85  | 4.51  |
| -1 | 4 | -6  | 158.47  | 4.64  |

## CIF 31

|    |   |    |        |       |
|----|---|----|--------|-------|
| -1 | 4 | -6 | 142.80 | 4.74  |
| -1 | 4 | -6 | 160.02 | 4.41  |
| -1 | 4 | -6 | 171.93 | 3.55  |
| -1 | 4 | -6 | 170.48 | 4.00  |
| -1 | 4 | -6 | 164.10 | 4.61  |
| -1 | 4 | -6 | 151.63 | 3.50  |
| -1 | 4 | -5 | 887.28 | 8.95  |
| -1 | 4 | -5 | 957.47 | 12.12 |
| -1 | 4 | -5 | 961.20 | 12.20 |
| -1 | 4 | -5 | 900.47 | 10.49 |
| -1 | 4 | -5 | 842.01 | 10.89 |
| -1 | 4 | -5 | 908.02 | 11.82 |
| -1 | 4 | -5 | 875.24 | 9.86  |
| -1 | 4 | -5 | 933.94 | 10.80 |
| -1 | 4 | -5 | 893.90 | 10.08 |
| -1 | 4 | -4 | 159.26 | 2.44  |
| -1 | 4 | -4 | 186.77 | 3.75  |
| -1 | 4 | -4 | 150.54 | 3.75  |
| -1 | 4 | -4 | 163.81 | 3.69  |
| -1 | 4 | -4 | 155.98 | 3.25  |
| -1 | 4 | -4 | 172.42 | 4.16  |
| -1 | 4 | -4 | 161.57 | 2.97  |
| -1 | 4 | -4 | 160.84 | 3.42  |
| -1 | 4 | -4 | 173.31 | 4.19  |
| -1 | 4 | -4 | 172.00 | 3.44  |
| -1 | 4 | -3 | 825.74 | 10.57 |
| -1 | 4 | -3 | 768.29 | 7.65  |
| -1 | 4 | -3 | 794.90 | 9.96  |
| -1 | 4 | -3 | 780.00 | 9.19  |
| -1 | 4 | -3 | 835.42 | 9.89  |
| -1 | 4 | -3 | 782.32 | 8.80  |
| -1 | 4 | -3 | 796.61 | 8.36  |
| -1 | 4 | -3 | 801.28 | 8.93  |
| -1 | 4 | -3 | 805.75 | 7.63  |
| -1 | 4 | -3 | 822.36 | 9.50  |
| -1 | 4 | -2 | 281.25 | 4.90  |
| -1 | 4 | -2 | 256.62 | 4.53  |
| -1 | 4 | -2 | 246.39 | 3.18  |
| -1 | 4 | -2 | 262.62 | 4.13  |
| -1 | 4 | -2 | 294.77 | 4.97  |
| -1 | 4 | -2 | 254.73 | 3.94  |

## CIF 31

|    |   |    |         |       |
|----|---|----|---------|-------|
| -1 | 4 | -2 | 263.05  | 3.61  |
| -1 | 4 | -2 | 296.51  | 4.13  |
| -1 | 4 | -2 | 262.02  | 5.21  |
| -1 | 4 | -2 | 252.84  | 4.33  |
| -1 | 4 | -2 | 263.80  | 4.64  |
| -1 | 4 | -2 | 279.40  | 4.21  |
| -1 | 4 | -2 | 261.52  | 3.91  |
| -1 | 4 | -1 | 4.96    | 0.64  |
| -1 | 4 | -1 | 6.79    | 0.69  |
| -1 | 4 | -1 | 11.28   | 1.00  |
| -1 | 4 | -1 | 3.50    | 0.64  |
| -1 | 4 | -1 | 7.91    | 0.84  |
| -1 | 4 | -1 | 6.86    | 0.64  |
| -1 | 4 | -1 | 3.97    | 0.66  |
| -1 | 4 | -1 | 5.72    | 0.53  |
| -1 | 4 | -1 | 5.40    | 0.57  |
| -1 | 4 | -1 | 5.74    | 0.94  |
| -1 | 4 | -1 | 7.27    | 0.88  |
| -1 | 4 | -1 | 10.67   | 0.81  |
| -1 | 4 | -1 | 5.71    | 0.72  |
| -1 | 4 | 0  | 5294.55 | 48.49 |
| -1 | 4 | 0  | 5138.96 | 47.28 |
| -1 | 4 | 0  | 5703.37 | 46.23 |
| -1 | 4 | 0  | 5407.28 | 46.70 |
| -1 | 4 | 0  | 5861.89 | 47.86 |
| -1 | 4 | 0  | 5329.80 | 47.86 |
| -1 | 4 | 0  | 5579.30 | 48.58 |
| -1 | 4 | 0  | 5717.64 | 46.49 |
| -1 | 4 | 0  | 5076.97 | 49.16 |
| -1 | 4 | 0  | 5763.66 | 47.06 |
| -1 | 4 | 1  | 754.90  | 7.79  |
| -1 | 4 | 1  | 705.58  | 7.04  |
| -1 | 4 | 1  | 589.75  | 7.51  |
| -1 | 4 | 1  | 576.44  | 6.94  |
| -1 | 4 | 1  | 655.68  | 9.38  |
| -1 | 4 | 1  | 722.99  | 9.15  |
| -1 | 4 | 1  | 717.87  | 7.87  |
| -1 | 4 | 1  | 728.19  | 7.49  |
| -1 | 4 | 2  | 195.66  | 2.94  |
| -1 | 4 | 2  | 179.67  | 3.45  |
| -1 | 4 | 2  | 169.28  | 4.15  |

## CIF 31

|    |   |     |        |       |
|----|---|-----|--------|-------|
| -1 | 4 | 2   | 206.95 | 4.42  |
| -1 | 4 | 2   | 205.01 | 3.56  |
| -1 | 4 | 3   | 230.66 | 4.26  |
| -1 | 4 | 3   | 283.71 | 3.84  |
| -1 | 4 | 3   | 231.09 | 5.27  |
| -1 | 4 | 3   | 252.36 | 5.05  |
| -1 | 4 | 3   | 246.17 | 5.12  |
| -1 | 4 | 3   | 279.76 | 4.53  |
| -1 | 4 | 4   | 51.35  | 2.06  |
| -1 | 4 | 4   | 58.05  | 1.69  |
| -1 | 4 | 4   | 50.04  | 2.50  |
| -1 | 4 | 4   | 51.92  | 2.36  |
| -1 | 4 | 4   | 56.03  | 2.04  |
| -1 | 4 | 5   | 351.58 | 7.26  |
| -1 | 4 | 5   | 410.79 | 5.62  |
| -1 | 4 | 5   | 361.00 | 6.76  |
| -1 | 4 | 5   | 407.84 | 6.48  |
| -1 | 4 | 5   | 353.81 | 7.46  |
| -1 | 4 | 6   | 17.13  | 1.69  |
| -1 | 4 | 6   | 17.74  | 1.13  |
| -1 | 4 | 6   | 17.50  | 1.46  |
| -1 | 4 | 6   | 19.18  | 1.44  |
| -1 | 4 | 6   | 17.65  | 1.79  |
| -1 | 4 | 7   | 698.38 | 11.33 |
| -1 | 4 | 7   | 688.27 | 11.95 |
| -1 | 4 | 8   | 854.53 | 11.84 |
| -1 | 4 | 8   | 722.62 | 12.45 |
| -1 | 4 | 9   | 837.14 | 14.38 |
| -1 | 4 | 9   | 912.38 | 13.93 |
| -1 | 4 | 10  | 583.42 | 9.43  |
| -1 | 4 | 10  | 443.61 | 9.35  |
| -1 | 4 | 10  | 465.15 | 10.52 |
| -1 | 4 | 10  | 533.66 | 9.05  |
| -1 | 4 | 11  | 265.12 | 6.27  |
| -1 | 4 | 11  | 245.97 | 6.83  |
| -1 | 4 | 12  | 30.21  | 1.82  |
| -1 | 5 | -15 | 47.28  | 1.51  |
| -1 | 5 | -14 | 306.01 | 4.80  |
| -1 | 5 | -14 | 306.13 | 5.54  |
| -1 | 5 | -13 | 8.45   | 1.13  |
| -1 | 5 | -13 | 11.12  | 1.73  |

## CIF 31

|    |   |     |         |       |
|----|---|-----|---------|-------|
| -1 | 5 | -13 | 8.93    | 1.47  |
| -1 | 5 | -13 | 9.79    | 1.65  |
| -1 | 5 | -13 | 10.73   | 1.35  |
| -1 | 5 | -12 | 2.50    | 1.45  |
| -1 | 5 | -12 | 1.97    | 1.27  |
| -1 | 5 | -12 | 5.51    | 1.15  |
| -1 | 5 | -12 | 4.43    | 1.03  |
| -1 | 5 | -12 | 1.08    | 1.47  |
| -1 | 5 | -12 | 5.12    | 1.27  |
| -1 | 5 | -11 | 57.97   | 3.55  |
| -1 | 5 | -11 | 51.61   | 3.87  |
| -1 | 5 | -11 | 45.53   | 3.34  |
| -1 | 5 | -11 | 51.01   | 2.67  |
| -1 | 5 | -11 | 52.08   | 2.63  |
| -1 | 5 | -11 | 49.51   | 2.82  |
| -1 | 5 | -11 | 52.76   | 4.54  |
| -1 | 5 | -10 | 2415.21 | 31.08 |
| -1 | 5 | -10 | 2323.49 | 29.54 |
| -1 | 5 | -10 | 2277.02 | 28.30 |
| -1 | 5 | -10 | 2519.81 | 26.17 |
| -1 | 5 | -10 | 2421.86 | 25.85 |
| -1 | 5 | -10 | 2533.47 | 26.56 |
| -1 | 5 | -9  | 864.44  | 12.81 |
| -1 | 5 | -9  | 909.61  | 14.21 |
| -1 | 5 | -9  | 884.29  | 14.11 |
| -1 | 5 | -9  | 901.82  | 15.82 |
| -1 | 5 | -9  | 904.26  | 12.25 |
| -1 | 5 | -9  | 850.79  | 14.95 |
| -1 | 5 | -9  | 912.92  | 13.60 |
| -1 | 5 | -9  | 873.31  | 12.24 |
| -1 | 5 | -8  | 19.22   | 2.54  |
| -1 | 5 | -8  | 25.15   | 2.29  |
| -1 | 5 | -8  | 24.31   | 2.20  |
| -1 | 5 | -8  | 28.78   | 2.30  |
| -1 | 5 | -8  | 24.38   | 2.22  |
| -1 | 5 | -8  | 26.87   | 2.43  |
| -1 | 5 | -8  | 23.82   | 2.42  |
| -1 | 5 | -8  | 20.44   | 1.62  |
| -1 | 5 | -8  | 23.86   | 1.97  |
| -1 | 5 | -8  | 19.87   | 3.39  |
| -1 | 5 | -8  | 22.61   | 1.68  |

## CIF 31

|    |   |    |         |       |
|----|---|----|---------|-------|
| -1 | 5 | -7 | 239.59  | 6.19  |
| -1 | 5 | -7 | 233.32  | 5.35  |
| -1 | 5 | -7 | 242.77  | 6.09  |
| -1 | 5 | -7 | 236.30  | 6.29  |
| -1 | 5 | -7 | 220.10  | 6.20  |
| -1 | 5 | -7 | 205.08  | 6.42  |
| -1 | 5 | -7 | 238.03  | 6.54  |
| -1 | 5 | -7 | 243.05  | 5.60  |
| -1 | 5 | -7 | 224.26  | 5.50  |
| -1 | 5 | -7 | 213.55  | 4.65  |
| -1 | 5 | -6 | 25.29   | 2.11  |
| -1 | 5 | -6 | 20.98   | 1.49  |
| -1 | 5 | -6 | 12.05   | 1.36  |
| -1 | 5 | -6 | 11.67   | 1.34  |
| -1 | 5 | -6 | 11.73   | 1.50  |
| -1 | 5 | -6 | 11.75   | 1.44  |
| -1 | 5 | -6 | 18.68   | 1.24  |
| -1 | 5 | -6 | 8.59    | 1.36  |
| -1 | 5 | -6 | 15.28   | 1.48  |
| -1 | 5 | -6 | 20.02   | 1.74  |
| -1 | 5 | -5 | 1599.12 | 18.52 |
| -1 | 5 | -5 | 1491.45 | 19.22 |
| -1 | 5 | -5 | 1684.81 | 17.88 |
| -1 | 5 | -5 | 1643.05 | 18.69 |
| -1 | 5 | -5 | 1681.36 | 19.28 |
| -1 | 5 | -5 | 1687.64 | 17.40 |
| -1 | 5 | -5 | 1655.73 | 18.11 |
| -1 | 5 | -5 | 1760.17 | 19.68 |
| -1 | 5 | -5 | 1628.45 | 16.42 |
| -1 | 5 | -5 | 1448.32 | 19.05 |
| -1 | 5 | -5 | 1670.18 | 19.58 |
| -1 | 5 | -5 | 1722.91 | 18.97 |
| -1 | 5 | -5 | 1654.79 | 17.20 |
| -1 | 5 | -5 | 1623.68 | 18.79 |
| -1 | 5 | -4 | 26.99   | 1.73  |
| -1 | 5 | -4 | 20.67   | 1.62  |
| -1 | 5 | -4 | 18.39   | 1.39  |
| -1 | 5 | -4 | 27.35   | 1.72  |
| -1 | 5 | -4 | 18.30   | 1.25  |
| -1 | 5 | -4 | 20.93   | 1.14  |
| -1 | 5 | -4 | 20.27   | 1.64  |

## CIF 31

|    |   |    |         |       |
|----|---|----|---------|-------|
| -1 | 5 | -4 | 25.40   | 1.81  |
| -1 | 5 | -4 | 25.42   | 1.53  |
| -1 | 5 | -3 | 120.45  | 2.23  |
| -1 | 5 | -3 | 121.39  | 3.14  |
| -1 | 5 | -3 | 124.88  | 3.54  |
| -1 | 5 | -3 | 122.04  | 2.93  |
| -1 | 5 | -3 | 120.23  | 3.64  |
| -1 | 5 | -3 | 129.99  | 2.71  |
| -1 | 5 | -3 | 124.32  | 3.12  |
| -1 | 5 | -3 | 123.82  | 2.94  |
| -1 | 5 | -3 | 131.91  | 3.79  |
| -1 | 5 | -3 | 123.33  | 3.41  |
| -1 | 5 | -3 | 123.06  | 3.94  |
| -1 | 5 | -3 | 112.66  | 2.95  |
| -1 | 5 | -3 | 120.29  | 2.66  |
| -1 | 5 | -2 | 549.74  | 8.07  |
| -1 | 5 | -2 | 607.54  | 6.57  |
| -1 | 5 | -2 | 621.60  | 7.91  |
| -1 | 5 | -2 | 627.67  | 8.84  |
| -1 | 5 | -2 | 571.38  | 8.17  |
| -1 | 5 | -2 | 693.57  | 9.16  |
| -1 | 5 | -2 | 573.23  | 6.96  |
| -1 | 5 | -2 | 604.43  | 7.35  |
| -1 | 5 | -2 | 578.08  | 8.55  |
| -1 | 5 | -2 | 520.10  | 9.18  |
| -1 | 5 | -2 | 601.35  | 8.65  |
| -1 | 5 | -2 | 590.12  | 7.64  |
| -1 | 5 | -2 | 582.68  | 7.41  |
| -1 | 5 | -2 | 566.06  | 7.64  |
| -1 | 5 | -1 | 1479.78 | 15.52 |
| -1 | 5 | -1 | 1543.35 | 15.13 |
| -1 | 5 | -1 | 1411.01 | 15.21 |
| -1 | 5 | -1 | 1498.39 | 16.61 |
| -1 | 5 | -1 | 1494.53 | 16.48 |
| -1 | 5 | -1 | 1417.47 | 14.41 |
| -1 | 5 | -1 | 1502.96 | 16.21 |
| -1 | 5 | -1 | 1414.79 | 16.08 |
| -1 | 5 | -1 | 1522.21 | 16.90 |
| -1 | 5 | -1 | 1535.09 | 15.34 |
| -1 | 5 | -1 | 1480.79 | 15.99 |
| -1 | 5 | 0  | 3168.39 | 29.97 |

## CIF 31

|    |   |   |         |       |
|----|---|---|---------|-------|
| -1 | 5 | 0 | 3327.50 | 30.74 |
| -1 | 5 | 0 | 3212.73 | 31.33 |
| -1 | 5 | 0 | 3210.58 | 31.09 |
| -1 | 5 | 0 | 3381.16 | 29.80 |
| -1 | 5 | 0 | 3334.12 | 32.05 |
| -1 | 5 | 0 | 3366.92 | 29.27 |
| -1 | 5 | 0 | 3489.64 | 30.75 |
| -1 | 5 | 0 | 3137.64 | 32.74 |
| -1 | 5 | 0 | 3364.89 | 31.93 |
| -1 | 5 | 0 | 3142.62 | 29.19 |
| -1 | 5 | 0 | 3467.67 | 30.08 |
| -1 | 5 | 1 | 583.53  | 7.80  |
| -1 | 5 | 1 | 730.50  | 7.14  |
| -1 | 5 | 1 | 602.77  | 8.26  |
| -1 | 5 | 1 | 667.27  | 9.34  |
| -1 | 5 | 1 | 689.60  | 8.25  |
| -1 | 5 | 1 | 657.55  | 9.88  |
| -1 | 5 | 1 | 682.59  | 7.94  |
| -1 | 5 | 1 | 626.24  | 8.78  |
| -1 | 5 | 1 | 641.49  | 7.41  |
| -1 | 5 | 1 | 606.17  | 10.02 |
| -1 | 5 | 1 | 640.57  | 9.70  |
| -1 | 5 | 1 | 701.74  | 8.37  |
| -1 | 5 | 2 | 3675.36 | 34.99 |
| -1 | 5 | 2 | 3632.34 | 33.38 |
| -1 | 5 | 2 | 3783.75 | 32.49 |
| -1 | 5 | 2 | 3895.81 | 36.49 |
| -1 | 5 | 2 | 3761.00 | 33.83 |
| -1 | 5 | 2 | 3827.45 | 33.82 |
| -1 | 5 | 3 | 126.75  | 3.58  |
| -1 | 5 | 3 | 117.49  | 4.13  |
| -1 | 5 | 3 | 128.97  | 2.55  |
| -1 | 5 | 3 | 130.97  | 4.01  |
| -1 | 5 | 3 | 134.41  | 4.21  |
| -1 | 5 | 3 | 141.08  | 3.43  |
| -1 | 5 | 4 | 888.62  | 9.40  |
| -1 | 5 | 4 | 881.08  | 13.32 |
| -1 | 5 | 4 | 913.41  | 12.83 |
| -1 | 5 | 4 | 886.23  | 11.19 |
| -1 | 5 | 5 | 1.49    | 0.80  |
| -1 | 5 | 5 | 2.34    | 0.70  |



## CIF 31

|    |   |     |        |       |
|----|---|-----|--------|-------|
| -1 | 5 | 5   | 1.91   | 1.22  |
| -1 | 5 | 6   | 948.32 | 13.86 |
| -1 | 5 | 6   | 949.52 | 14.54 |
| -1 | 5 | 6   | 964.46 | 13.55 |
| -1 | 5 | 6   | 932.83 | 14.93 |
| -1 | 5 | 7   | 213.73 | 6.23  |
| -1 | 5 | 7   | 212.62 | 6.50  |
| -1 | 5 | 7   | 223.88 | 6.34  |
| -1 | 5 | 8   | 35.96  | 2.47  |
| -1 | 5 | 8   | 38.71  | 2.34  |
| -1 | 5 | 8   | 34.54  | 2.43  |
| -1 | 5 | 8   | 38.88  | 2.27  |
| -1 | 5 | 8   | 40.86  | 2.92  |
| -1 | 5 | 9   | 46.31  | 2.53  |
| -1 | 5 | 9   | 42.79  | 2.98  |
| -1 | 5 | 9   | 52.13  | 2.61  |
| -1 | 5 | 9   | 41.53  | 2.52  |
| -1 | 5 | 9   | 41.97  | 2.78  |
| -1 | 5 | 10  | 28.11  | 2.32  |
| -1 | 5 | 10  | 29.15  | 1.93  |
| -1 | 5 | 10  | 24.00  | 2.13  |
| -1 | 5 | 10  | 24.73  | 2.43  |
| -1 | 5 | 11  | 91.52  | 3.33  |
| -1 | 5 | 11  | 89.22  | 3.74  |
| -1 | 5 | 12  | 0.21   | 0.57  |
| -1 | 5 | 12  | 0.13   | 0.49  |
| -1 | 6 | -15 | 24.79  | 1.03  |
| -1 | 6 | -14 | 11.76  | 1.10  |
| -1 | 6 | -13 | 0.05   | 1.01  |
| -1 | 6 | -13 | 0.95   | 0.72  |
| -1 | 6 | -13 | 0.85   | 0.85  |
| -1 | 6 | -12 | 0.57   | 1.32  |
| -1 | 6 | -12 | 2.14   | 0.93  |
| -1 | 6 | -12 | 1.88   | 1.04  |
| -1 | 6 | -11 | 137.34 | 5.32  |
| -1 | 6 | -11 | 138.30 | 6.30  |
| -1 | 6 | -11 | 149.89 | 4.16  |
| -1 | 6 | -11 | 139.76 | 4.28  |
| -1 | 6 | -11 | 150.48 | 5.82  |
| -1 | 6 | -10 | 52.63  | 4.01  |
| -1 | 6 | -10 | 49.44  | 3.49  |

## CIF 31

|    |   |     |         |       |
|----|---|-----|---------|-------|
| -1 | 6 | -10 | 52.14   | 3.42  |
| -1 | 6 | -10 | 51.46   | 3.23  |
| -1 | 6 | -10 | 51.21   | 3.24  |
| -1 | 6 | -10 | 49.91   | 2.67  |
| -1 | 6 | -10 | 49.22   | 3.13  |
| -1 | 6 | -10 | 50.02   | 3.66  |
| -1 | 6 | -10 | 44.69   | 4.29  |
| -1 | 6 | -9  | 247.13  | 7.32  |
| -1 | 6 | -9  | 258.20  | 7.33  |
| -1 | 6 | -9  | 235.82  | 6.94  |
| -1 | 6 | -9  | 228.39  | 6.84  |
| -1 | 6 | -9  | 244.27  | 7.64  |
| -1 | 6 | -9  | 238.24  | 5.41  |
| -1 | 6 | -9  | 244.39  | 6.73  |
| -1 | 6 | -8  | 1620.98 | 18.84 |
| -1 | 6 | -8  | 1544.97 | 22.20 |
| -1 | 6 | -8  | 1514.94 | 20.80 |
| -1 | 6 | -8  | 1637.36 | 20.86 |
| -1 | 6 | -8  | 1607.75 | 21.72 |
| -1 | 6 | -8  | 1554.04 | 19.23 |
| -1 | 6 | -8  | 1516.35 | 21.02 |
| -1 | 6 | -8  | 1466.52 | 20.89 |
| -1 | 6 | -8  | 1544.47 | 17.44 |
| -1 | 6 | -7  | 1241.14 | 17.99 |
| -1 | 6 | -7  | 1327.39 | 17.14 |
| -1 | 6 | -7  | 1331.19 | 18.15 |
| -1 | 6 | -7  | 1276.21 | 14.54 |
| -1 | 6 | -7  | 1336.36 | 19.09 |
| -1 | 6 | -7  | 1284.98 | 16.20 |
| -1 | 6 | -7  | 1300.35 | 18.39 |
| -1 | 6 | -7  | 1230.67 | 14.38 |
| -1 | 6 | -6  | 5.32    | 1.35  |
| -1 | 6 | -6  | 4.15    | 1.11  |
| -1 | 6 | -6  | 3.28    | 0.99  |
| -1 | 6 | -6  | 4.78    | 1.26  |
| -1 | 6 | -6  | 4.89    | 1.35  |
| -1 | 6 | -6  | 6.12    | 0.87  |
| -1 | 6 | -6  | 5.91    | 1.05  |
| -1 | 6 | -6  | 4.77    | 1.28  |
| -1 | 6 | -6  | 4.05    | 1.35  |
| -1 | 6 | -5  | 583.88  | 8.70  |

## CIF 31

|    |   |    |         |       |
|----|---|----|---------|-------|
| -1 | 6 | -5 | 593.91  | 9.93  |
| -1 | 6 | -5 | 597.04  | 9.41  |
| -1 | 6 | -5 | 603.50  | 10.60 |
| -1 | 6 | -5 | 654.18  | 10.89 |
| -1 | 6 | -5 | 585.90  | 9.25  |
| -1 | 6 | -5 | 621.34  | 10.28 |
| -1 | 6 | -5 | 615.88  | 10.13 |
| -1 | 6 | -5 | 593.75  | 9.67  |
| -1 | 6 | -5 | 594.33  | 8.80  |
| -1 | 6 | -5 | 597.08  | 8.06  |
| -1 | 6 | -5 | 619.94  | 9.13  |
| -1 | 6 | -5 | 592.74  | 10.37 |
| -1 | 6 | -5 | 612.73  | 9.13  |
| -1 | 6 | -4 | 77.41   | 3.04  |
| -1 | 6 | -4 | 61.93   | 2.89  |
| -1 | 6 | -4 | 67.12   | 3.01  |
| -1 | 6 | -4 | 68.13   | 3.10  |
| -1 | 6 | -4 | 80.04   | 2.92  |
| -1 | 6 | -4 | 76.62   | 3.17  |
| -1 | 6 | -4 | 69.68   | 3.08  |
| -1 | 6 | -4 | 82.60   | 2.79  |
| -1 | 6 | -4 | 64.08   | 3.20  |
| -1 | 6 | -4 | 73.63   | 2.30  |
| -1 | 6 | -4 | 67.97   | 2.48  |
| -1 | 6 | -4 | 72.34   | 2.63  |
| -1 | 6 | -4 | 75.12   | 3.50  |
| -1 | 6 | -4 | 72.31   | 3.13  |
| -1 | 6 | -4 | 70.93   | 2.86  |
| -1 | 6 | -3 | 2334.26 | 24.90 |
| -1 | 6 | -3 | 2290.20 | 24.57 |
| -1 | 6 | -3 | 2324.16 | 24.75 |
| -1 | 6 | -3 | 2366.52 | 23.86 |
| -1 | 6 | -3 | 2332.27 | 23.75 |
| -1 | 6 | -3 | 2404.71 | 25.79 |
| -1 | 6 | -3 | 2465.18 | 25.28 |
| -1 | 6 | -3 | 2344.70 | 24.76 |
| -1 | 6 | -3 | 2451.17 | 25.72 |
| -1 | 6 | -3 | 2323.38 | 22.43 |
| -1 | 6 | -3 | 2468.84 | 24.17 |
| -1 | 6 | -3 | 2360.26 | 23.09 |
| -1 | 6 | -3 | 2281.61 | 23.05 |

## CIF 31

|    |   |    |         |       |
|----|---|----|---------|-------|
| -1 | 6 | -3 | 2390.27 | 25.30 |
| -1 | 6 | -3 | 2264.46 | 26.53 |
| -1 | 6 | -3 | 2497.40 | 25.56 |
| -1 | 6 | -3 | 2455.54 | 24.94 |
| -1 | 6 | -3 | 2219.70 | 23.19 |
| -1 | 6 | -3 | 2329.62 | 22.78 |
| -1 | 6 | -2 | 1828.97 | 20.79 |
| -1 | 6 | -2 | 1966.04 | 20.34 |
| -1 | 6 | -2 | 1938.00 | 18.02 |
| -1 | 6 | -2 | 1743.71 | 19.57 |
| -1 | 6 | -2 | 1702.99 | 20.85 |
| -1 | 6 | -2 | 1854.52 | 20.85 |
| -1 | 6 | -2 | 2008.52 | 22.19 |
| -1 | 6 | -2 | 1947.96 | 21.28 |
| -1 | 6 | -2 | 1955.35 | 18.82 |
| -1 | 6 | -2 | 1901.30 | 20.83 |
| -1 | 6 | -2 | 2046.01 | 19.25 |
| -1 | 6 | -2 | 1855.96 | 20.87 |
| -1 | 6 | -2 | 1745.26 | 22.52 |
| -1 | 6 | -2 | 2049.74 | 21.62 |
| -1 | 6 | -2 | 1918.84 | 19.54 |
| -1 | 6 | -2 | 2018.78 | 19.60 |
| -1 | 6 | -2 | 1900.11 | 19.88 |
| -1 | 6 | -1 | 754.64  | 10.86 |
| -1 | 6 | -1 | 799.97  | 9.90  |
| -1 | 6 | -1 | 792.42  | 11.45 |
| -1 | 6 | -1 | 753.75  | 10.68 |
| -1 | 6 | -1 | 788.23  | 11.93 |
| -1 | 6 | -1 | 759.13  | 10.89 |
| -1 | 6 | -1 | 777.06  | 10.94 |
| -1 | 6 | -1 | 805.02  | 11.52 |
| -1 | 6 | -1 | 791.88  | 11.76 |
| -1 | 6 | -1 | 817.97  | 9.47  |
| -1 | 6 | -1 | 767.35  | 9.28  |
| -1 | 6 | -1 | 754.35  | 11.55 |
| -1 | 6 | -1 | 845.05  | 10.11 |
| -1 | 6 | -1 | 789.41  | 10.87 |
| -1 | 6 | 0  | 157.61  | 4.20  |
| -1 | 6 | 0  | 143.99  | 3.95  |
| -1 | 6 | 0  | 158.83  | 4.77  |
| -1 | 6 | 0  | 157.46  | 3.71  |

## CIF 31

|    |   |   |        |      |
|----|---|---|--------|------|
| -1 | 6 | 0 | 147.38 | 4.37 |
| -1 | 6 | 0 | 153.41 | 4.60 |
| -1 | 6 | 0 | 150.18 | 4.63 |
| -1 | 6 | 0 | 169.31 | 3.58 |
| -1 | 6 | 0 | 166.94 | 3.34 |
| -1 | 6 | 0 | 154.71 | 3.90 |
| -1 | 6 | 0 | 155.71 | 5.10 |
| -1 | 6 | 0 | 152.44 | 4.65 |
| -1 | 6 | 0 | 155.02 | 3.67 |
| -1 | 6 | 0 | 147.62 | 4.33 |
| -1 | 6 | 0 | 155.86 | 3.39 |
| -1 | 6 | 1 | 1.44   | 0.61 |
| -1 | 6 | 1 | 2.38   | 0.65 |
| -1 | 6 | 1 | 0.94   | 0.79 |
| -1 | 6 | 1 | 0.12   | 0.54 |
| -1 | 6 | 1 | 1.27   | 0.66 |
| -1 | 6 | 1 | 0.67   | 0.84 |
| -1 | 6 | 1 | 0.82   | 0.85 |
| -1 | 6 | 1 | 0.38   | 0.97 |
| -1 | 6 | 1 | 1.02   | 0.45 |
| -1 | 6 | 1 | -0.13  | 1.02 |
| -1 | 6 | 1 | 0.98   | 0.64 |
| -1 | 6 | 2 | 166.00 | 4.86 |
| -1 | 6 | 2 | 171.10 | 5.05 |
| -1 | 6 | 2 | 187.06 | 4.92 |
| -1 | 6 | 2 | 188.03 | 4.12 |
| -1 | 6 | 2 | 177.00 | 4.14 |
| -1 | 6 | 2 | 177.26 | 3.31 |
| -1 | 6 | 2 | 178.22 | 5.31 |
| -1 | 6 | 2 | 178.44 | 4.10 |
| -1 | 6 | 3 | 158.27 | 4.85 |
| -1 | 6 | 3 | 159.29 | 4.77 |
| -1 | 6 | 3 | 163.77 | 4.59 |
| -1 | 6 | 3 | 162.21 | 5.42 |
| -1 | 6 | 3 | 181.28 | 4.37 |
| -1 | 6 | 3 | 178.34 | 5.43 |
| -1 | 6 | 3 | 176.48 | 4.22 |
| -1 | 6 | 3 | 191.47 | 4.33 |
| -1 | 6 | 3 | 166.98 | 5.49 |
| -1 | 6 | 4 | 409.06 | 7.17 |
| -1 | 6 | 4 | 386.90 | 8.98 |

## CIF 31

|    |   |     |        |      |
|----|---|-----|--------|------|
| -1 | 6 | 4   | 358.85 | 8.24 |
| -1 | 6 | 4   | 406.03 | 7.10 |
| -1 | 6 | 4   | 443.51 | 7.51 |
| -1 | 6 | 5   | 115.31 | 3.75 |
| -1 | 6 | 5   | 108.66 | 4.68 |
| -1 | 6 | 5   | 100.91 | 4.20 |
| -1 | 6 | 5   | 115.91 | 3.68 |
| -1 | 6 | 5   | 105.33 | 4.73 |
| -1 | 6 | 5   | 123.36 | 3.92 |
| -1 | 6 | 6   | 247.82 | 5.88 |
| -1 | 6 | 6   | 227.07 | 5.72 |
| -1 | 6 | 6   | 239.54 | 6.55 |
| -1 | 6 | 6   | 246.12 | 5.83 |
| -1 | 6 | 6   | 231.66 | 6.85 |
| -1 | 6 | 6   | 211.62 | 5.98 |
| -1 | 6 | 6   | 263.08 | 5.84 |
| -1 | 6 | 6   | 235.12 | 7.19 |
| -1 | 6 | 7   | 262.14 | 7.15 |
| -1 | 6 | 7   | 286.62 | 6.55 |
| -1 | 6 | 7   | 266.36 | 7.21 |
| -1 | 6 | 7   | 288.72 | 6.27 |
| -1 | 6 | 7   | 250.15 | 7.37 |
| -1 | 6 | 7   | 296.96 | 6.56 |
| -1 | 6 | 8   | 113.69 | 5.06 |
| -1 | 6 | 8   | 112.50 | 4.30 |
| -1 | 6 | 8   | 138.87 | 4.39 |
| -1 | 6 | 8   | 107.49 | 4.20 |
| -1 | 6 | 8   | 133.75 | 4.08 |
| -1 | 6 | 8   | 134.55 | 4.29 |
| -1 | 6 | 8   | 115.23 | 4.79 |
| -1 | 6 | 9   | 90.49  | 4.13 |
| -1 | 6 | 9   | 89.63  | 4.33 |
| -1 | 6 | 9   | 96.24  | 3.60 |
| -1 | 6 | 9   | 89.77  | 3.82 |
| -1 | 6 | 10  | 86.35  | 3.59 |
| -1 | 6 | 10  | 88.61  | 3.50 |
| -1 | 6 | 11  | 50.33  | 2.27 |
| -1 | 7 | -14 | 127.41 | 3.09 |
| -1 | 7 | -13 | 73.96  | 2.55 |
| -1 | 7 | -13 | 80.57  | 2.88 |
| -1 | 7 | -12 | 310.56 | 7.80 |

## CIF 31

|    |   |     |        |       |
|----|---|-----|--------|-------|
| -1 | 7 | -12 | 362.61 | 6.65  |
| -1 | 7 | -12 | 307.56 | 8.90  |
| -1 | 7 | -12 | 372.18 | 7.15  |
| -1 | 7 | -11 | 125.27 | 4.77  |
| -1 | 7 | -11 | 125.20 | 5.15  |
| -1 | 7 | -10 | 14.30  | 2.45  |
| -1 | 7 | -10 | 23.66  | 2.35  |
| -1 | 7 | -10 | 22.41  | 2.38  |
| -1 | 7 | -10 | 21.27  | 2.62  |
| -1 | 7 | -10 | 19.73  | 2.39  |
| -1 | 7 | -10 | 23.46  | 1.88  |
| -1 | 7 | -10 | 17.85  | 2.17  |
| -1 | 7 | -10 | 19.53  | 2.95  |
| -1 | 7 | -9  | 395.77 | 9.72  |
| -1 | 7 | -9  | 504.03 | 9.74  |
| -1 | 7 | -9  | 402.91 | 10.67 |
| -1 | 7 | -9  | 472.32 | 8.31  |
| -1 | 7 | -9  | 386.48 | 9.58  |
| -1 | 7 | -9  | 349.56 | 9.64  |
| -1 | 7 | -9  | 432.87 | 8.65  |
| -1 | 7 | -8  | 476.96 | 11.17 |
| -1 | 7 | -8  | 440.29 | 10.58 |
| -1 | 7 | -8  | 470.33 | 9.50  |
| -1 | 7 | -8  | 434.08 | 10.19 |
| -1 | 7 | -8  | 422.71 | 9.89  |
| -1 | 7 | -7  | 11.83  | 1.70  |
| -1 | 7 | -7  | 17.85  | 1.69  |
| -1 | 7 | -7  | 13.08  | 1.97  |
| -1 | 7 | -7  | 11.85  | 1.87  |
| -1 | 7 | -7  | 8.21   | 1.57  |
| -1 | 7 | -7  | 10.28  | 1.57  |
| -1 | 7 | -7  | 11.77  | 1.93  |
| -1 | 7 | -7  | 14.44  | 2.06  |
| -1 | 7 | -7  | 16.45  | 1.82  |
| -1 | 7 | -6  | 811.88 | 13.32 |
| -1 | 7 | -6  | 818.51 | 11.82 |
| -1 | 7 | -6  | 807.30 | 13.16 |
| -1 | 7 | -6  | 807.14 | 12.16 |
| -1 | 7 | -6  | 833.41 | 12.39 |
| -1 | 7 | -6  | 822.64 | 14.08 |
| -1 | 7 | -6  | 842.94 | 12.16 |

## CIF 31

|    |   |    |         |       |
|----|---|----|---------|-------|
| -1 | 7 | -6 | 814.54  | 13.76 |
| -1 | 7 | -6 | 797.07  | 11.55 |
| -1 | 7 | -6 | 806.44  | 11.49 |
| -1 | 7 | -5 | 13.26   | 1.75  |
| -1 | 7 | -5 | 15.47   | 1.82  |
| -1 | 7 | -5 | 12.57   | 1.49  |
| -1 | 7 | -5 | 15.56   | 1.90  |
| -1 | 7 | -5 | 21.96   | 2.07  |
| -1 | 7 | -5 | 14.17   | 1.71  |
| -1 | 7 | -5 | 14.82   | 1.51  |
| -1 | 7 | -5 | 16.43   | 1.88  |
| -1 | 7 | -5 | 13.61   | 1.54  |
| -1 | 7 | -5 | 16.22   | 1.82  |
| -1 | 7 | -5 | 11.42   | 1.10  |
| -1 | 7 | -5 | 13.37   | 1.44  |
| -1 | 7 | -5 | 13.21   | 1.44  |
| -1 | 7 | -5 | 9.69    | 1.24  |
| -1 | 7 | -4 | 1030.26 | 14.42 |
| -1 | 7 | -4 | 894.27  | 13.02 |
| -1 | 7 | -4 | 1000.12 | 15.06 |
| -1 | 7 | -4 | 1059.41 | 15.43 |
| -1 | 7 | -4 | 1081.14 | 15.40 |
| -1 | 7 | -4 | 967.48  | 14.38 |
| -1 | 7 | -4 | 948.09  | 14.17 |
| -1 | 7 | -4 | 996.45  | 14.43 |
| -1 | 7 | -4 | 1018.16 | 13.06 |
| -1 | 7 | -4 | 1037.13 | 12.12 |
| -1 | 7 | -4 | 1028.58 | 13.18 |
| -1 | 7 | -4 | 1095.48 | 13.23 |
| -1 | 7 | -4 | 1044.80 | 14.24 |
| -1 | 7 | -4 | 1066.73 | 15.48 |
| -1 | 7 | -4 | 971.30  | 12.32 |
| -1 | 7 | -3 | 31.76   | 2.28  |
| -1 | 7 | -3 | 32.45   | 2.25  |
| -1 | 7 | -3 | 32.57   | 2.09  |
| -1 | 7 | -3 | 48.03   | 2.90  |
| -1 | 7 | -3 | 32.14   | 2.48  |
| -1 | 7 | -3 | 35.82   | 2.42  |
| -1 | 7 | -3 | 28.20   | 2.02  |
| -1 | 7 | -3 | 33.28   | 1.72  |
| -1 | 7 | -3 | 34.18   | 1.94  |



## CIF 31

|    |   |    |        |       |
|----|---|----|--------|-------|
| -1 | 7 | -3 | 29.44  | 2.31  |
| -1 | 7 | -3 | 30.27  | 2.04  |
| -1 | 7 | -3 | 28.12  | 1.74  |
| -1 | 7 | -3 | 34.87  | 2.40  |
| -1 | 7 | -3 | 33.86  | 2.33  |
| -1 | 7 | -3 | 52.61  | 2.12  |
| -1 | 7 | -2 | 670.34 | 10.84 |
| -1 | 7 | -2 | 602.84 | 7.85  |
| -1 | 7 | -2 | 611.23 | 10.65 |
| -1 | 7 | -2 | 653.29 | 10.78 |
| -1 | 7 | -2 | 615.00 | 8.59  |
| -1 | 7 | -2 | 630.51 | 8.85  |
| -1 | 7 | -2 | 575.31 | 10.96 |
| -1 | 7 | -2 | 643.01 | 10.63 |
| -1 | 7 | -2 | 640.04 | 10.53 |
| -1 | 7 | -2 | 682.72 | 11.25 |
| -1 | 7 | -2 | 725.83 | 9.63  |
| -1 | 7 | -2 | 652.35 | 9.40  |
| -1 | 7 | -2 | 630.95 | 9.77  |
| -1 | 7 | -1 | 332.67 | 7.14  |
| -1 | 7 | -1 | 334.34 | 6.90  |
| -1 | 7 | -1 | 342.05 | 7.82  |
| -1 | 7 | -1 | 352.02 | 7.69  |
| -1 | 7 | -1 | 358.35 | 8.14  |
| -1 | 7 | -1 | 332.93 | 7.19  |
| -1 | 7 | -1 | 368.26 | 7.82  |
| -1 | 7 | -1 | 364.89 | 6.06  |
| -1 | 7 | -1 | 334.88 | 5.67  |
| -1 | 7 | -1 | 337.75 | 7.79  |
| -1 | 7 | -1 | 330.95 | 6.18  |
| -1 | 7 | -1 | 325.05 | 6.94  |
| -1 | 7 | -1 | 334.63 | 6.32  |
| -1 | 7 | 0  | 56.00  | 2.78  |
| -1 | 7 | 0  | 72.05  | 2.77  |
| -1 | 7 | 0  | 52.27  | 3.00  |
| -1 | 7 | 0  | 55.49  | 3.22  |
| -1 | 7 | 0  | 56.04  | 2.99  |
| -1 | 7 | 0  | 57.26  | 2.72  |
| -1 | 7 | 0  | 54.20  | 3.14  |
| -1 | 7 | 0  | 64.76  | 2.42  |
| -1 | 7 | 0  | 61.32  | 2.13  |

## CIF 31

|    |   |   |         |       |
|----|---|---|---------|-------|
| -1 | 7 | 0 | 49.18   | 2.37  |
| -1 | 7 | 0 | 51.18   | 3.09  |
| -1 | 7 | 0 | 58.92   | 2.44  |
| -1 | 7 | 0 | 56.73   | 3.02  |
| -1 | 7 | 1 | 11.76   | 1.35  |
| -1 | 7 | 1 | 10.51   | 1.24  |
| -1 | 7 | 1 | 11.99   | 1.56  |
| -1 | 7 | 1 | 12.10   | 1.16  |
| -1 | 7 | 1 | 12.36   | 1.21  |
| -1 | 7 | 1 | 13.05   | 0.99  |
| -1 | 7 | 1 | 14.19   | 1.71  |
| -1 | 7 | 1 | 13.81   | 1.91  |
| -1 | 7 | 1 | 13.55   | 1.26  |
| -1 | 7 | 1 | 11.32   | 1.64  |
| -1 | 7 | 1 | 12.69   | 1.73  |
| -1 | 7 | 2 | 60.04   | 3.27  |
| -1 | 7 | 2 | 65.77   | 3.26  |
| -1 | 7 | 2 | 86.07   | 3.15  |
| -1 | 7 | 2 | 65.36   | 3.45  |
| -1 | 7 | 2 | 53.02   | 3.40  |
| -1 | 7 | 2 | 86.02   | 3.04  |
| -1 | 7 | 2 | 82.93   | 2.95  |
| -1 | 7 | 2 | 66.19   | 3.62  |
| -1 | 7 | 2 | 72.73   | 2.82  |
| -1 | 7 | 2 | 64.51   | 3.61  |
| -1 | 7 | 3 | 478.00  | 8.00  |
| -1 | 7 | 3 | 440.94  | 9.13  |
| -1 | 7 | 3 | 436.02  | 8.65  |
| -1 | 7 | 3 | 485.88  | 8.36  |
| -1 | 7 | 3 | 404.34  | 9.77  |
| -1 | 7 | 3 | 449.87  | 9.12  |
| -1 | 7 | 3 | 481.71  | 10.10 |
| -1 | 7 | 3 | 496.61  | 8.18  |
| -1 | 7 | 3 | 455.00  | 10.02 |
| -1 | 7 | 4 | 1480.97 | 19.15 |
| -1 | 7 | 4 | 1685.36 | 19.23 |
| -1 | 7 | 4 | 1804.10 | 19.95 |
| -1 | 7 | 4 | 1594.51 | 22.49 |
| -1 | 7 | 4 | 1576.11 | 21.42 |
| -1 | 7 | 4 | 1711.82 | 18.98 |
| -1 | 7 | 5 | 662.83  | 10.95 |

## CIF 31

|    |   |     |        |       |
|----|---|-----|--------|-------|
| -1 | 7 | 5   | 699.85 | 10.74 |
| -1 | 7 | 5   | 643.28 | 11.43 |
| -1 | 7 | 5   | 713.62 | 10.92 |
| -1 | 7 | 5   | 663.52 | 12.80 |
| -1 | 7 | 5   | 676.51 | 12.15 |
| -1 | 7 | 5   | 699.78 | 10.44 |
| -1 | 7 | 6   | 520.05 | 10.97 |
| -1 | 7 | 6   | 489.55 | 10.05 |
| -1 | 7 | 6   | 644.70 | 10.33 |
| -1 | 7 | 6   | 614.97 | 9.96  |
| -1 | 7 | 6   | 519.78 | 11.01 |
| -1 | 7 | 6   | 472.88 | 9.67  |
| -1 | 7 | 6   | 596.83 | 9.34  |
| -1 | 7 | 6   | 561.45 | 11.67 |
| -1 | 7 | 7   | 63.76  | 3.47  |
| -1 | 7 | 7   | 61.89  | 3.43  |
| -1 | 7 | 7   | 58.67  | 3.56  |
| -1 | 7 | 8   | 94.18  | 3.66  |
| -1 | 7 | 8   | 104.08 | 4.46  |
| -1 | 7 | 8   | 102.20 | 4.06  |
| -1 | 7 | 8   | 96.79  | 4.16  |
| -1 | 7 | 9   | 238.57 | 6.06  |
| -1 | 7 | 9   | 228.14 | 5.86  |
| -1 | 7 | 10  | 16.79  | 1.38  |
| -1 | 8 | -14 | 48.15  | 1.65  |
| -1 | 8 | -13 | 98.17  | 2.66  |
| -1 | 8 | -13 | 97.41  | 3.46  |
| -1 | 8 | -13 | 97.47  | 2.98  |
| -1 | 8 | -12 | 374.55 | 6.42  |
| -1 | 8 | -12 | 360.65 | 6.78  |
| -1 | 8 | -11 | 423.67 | 9.33  |
| -1 | 8 | -11 | 395.33 | 10.22 |
| -1 | 8 | -11 | 405.69 | 8.86  |
| -1 | 8 | -11 | 411.36 | 8.94  |
| -1 | 8 | -10 | 96.57  | 5.30  |
| -1 | 8 | -10 | 89.89  | 4.37  |
| -1 | 8 | -10 | 98.90  | 4.65  |
| -1 | 8 | -10 | 99.21  | 4.65  |
| -1 | 8 | -10 | 104.54 | 3.66  |
| -1 | 8 | -10 | 84.22  | 4.24  |
| -1 | 8 | -9  | 87.40  | 4.81  |

## CIF 31

|    |   |    |        |      |
|----|---|----|--------|------|
| -1 | 8 | -9 | 91.41  | 4.50 |
| -1 | 8 | -9 | 97.72  | 4.15 |
| -1 | 8 | -9 | 98.03  | 4.82 |
| -1 | 8 | -8 | 18.88  | 2.40 |
| -1 | 8 | -8 | 21.19  | 2.36 |
| -1 | 8 | -8 | 20.99  | 2.21 |
| -1 | 8 | -8 | 20.76  | 2.11 |
| -1 | 8 | -8 | 17.81  | 2.41 |
| -1 | 8 | -8 | 20.75  | 2.09 |
| -1 | 8 | -8 | 17.34  | 2.31 |
| -1 | 8 | -8 | 18.98  | 1.99 |
| -1 | 8 | -8 | 20.82  | 2.59 |
| -1 | 8 | -7 | 197.52 | 6.48 |
| -1 | 8 | -7 | 223.42 | 7.39 |
| -1 | 8 | -7 | 232.70 | 7.07 |
| -1 | 8 | -7 | 236.28 | 6.94 |
| -1 | 8 | -7 | 273.99 | 6.35 |
| -1 | 8 | -7 | 218.66 | 7.19 |
| -1 | 8 | -7 | 224.61 | 7.43 |
| -1 | 8 | -7 | 230.88 | 6.29 |
| -1 | 8 | -7 | 259.11 | 6.12 |
| -1 | 8 | -6 | 36.85  | 2.91 |
| -1 | 8 | -6 | 34.73  | 2.54 |
| -1 | 8 | -6 | 44.59  | 3.18 |
| -1 | 8 | -6 | 43.10  | 3.04 |
| -1 | 8 | -6 | 47.54  | 2.65 |
| -1 | 8 | -6 | 41.74  | 2.99 |
| -1 | 8 | -6 | 41.48  | 2.54 |
| -1 | 8 | -6 | 47.99  | 2.87 |
| -1 | 8 | -6 | 43.27  | 2.56 |
| -1 | 8 | -6 | 51.18  | 3.51 |
| -1 | 8 | -6 | 42.64  | 2.44 |
| -1 | 8 | -5 | 165.69 | 6.07 |
| -1 | 8 | -5 | 175.06 | 5.73 |
| -1 | 8 | -5 | 162.59 | 5.96 |
| -1 | 8 | -5 | 163.82 | 5.90 |
| -1 | 8 | -5 | 169.61 | 5.95 |
| -1 | 8 | -5 | 166.29 | 5.67 |
| -1 | 8 | -5 | 164.84 | 4.83 |
| -1 | 8 | -5 | 151.93 | 5.53 |
| -1 | 8 | -5 | 154.29 | 4.69 |

## CIF 31

|    |   |    |        |       |
|----|---|----|--------|-------|
| -1 | 8 | -5 | 163.98 | 5.41  |
| -1 | 8 | -5 | 161.33 | 5.17  |
| -1 | 8 | -4 | 263.55 | 7.07  |
| -1 | 8 | -4 | 246.14 | 7.18  |
| -1 | 8 | -4 | 270.37 | 7.59  |
| -1 | 8 | -4 | 272.98 | 7.28  |
| -1 | 8 | -4 | 244.25 | 6.65  |
| -1 | 8 | -4 | 267.74 | 7.49  |
| -1 | 8 | -4 | 270.86 | 6.19  |
| -1 | 8 | -4 | 262.29 | 6.96  |
| -1 | 8 | -4 | 254.92 | 7.25  |
| -1 | 8 | -4 | 255.18 | 6.15  |
| -1 | 8 | -4 | 251.36 | 5.81  |
| -1 | 8 | -4 | 267.32 | 6.90  |
| -1 | 8 | -3 | 186.02 | 5.81  |
| -1 | 8 | -3 | 184.17 | 6.21  |
| -1 | 8 | -3 | 170.53 | 5.73  |
| -1 | 8 | -3 | 179.01 | 5.33  |
| -1 | 8 | -3 | 183.70 | 6.28  |
| -1 | 8 | -3 | 195.46 | 6.09  |
| -1 | 8 | -3 | 185.50 | 5.93  |
| -1 | 8 | -3 | 186.66 | 4.45  |
| -1 | 8 | -3 | 185.71 | 5.01  |
| -1 | 8 | -3 | 197.87 | 4.82  |
| -1 | 8 | -3 | 181.99 | 5.86  |
| -1 | 8 | -3 | 178.52 | 5.78  |
| -1 | 8 | -3 | 177.52 | 5.36  |
| -1 | 8 | -2 | 609.73 | 11.09 |
| -1 | 8 | -2 | 608.64 | 10.94 |
| -1 | 8 | -2 | 602.11 | 11.24 |
| -1 | 8 | -2 | 629.49 | 11.64 |
| -1 | 8 | -2 | 544.14 | 10.72 |
| -1 | 8 | -2 | 616.64 | 9.15  |
| -1 | 8 | -2 | 621.58 | 10.97 |
| -1 | 8 | -2 | 676.24 | 9.45  |
| -1 | 8 | -2 | 669.09 | 10.15 |
| -1 | 8 | -2 | 629.22 | 11.81 |
| -1 | 8 | -2 | 585.93 | 9.42  |
| -1 | 8 | -2 | 610.38 | 10.25 |
| -1 | 8 | -1 | 3.29   | 1.13  |
| -1 | 8 | -1 | 2.21   | 1.33  |

## CIF 31

|    |   |    |         |       |
|----|---|----|---------|-------|
| -1 | 8 | -1 | 2.40    | 1.31  |
| -1 | 8 | -1 | 3.06    | 1.00  |
| -1 | 8 | -1 | 3.32    | 1.33  |
| -1 | 8 | -1 | 2.87    | 1.38  |
| -1 | 8 | -1 | 4.70    | 1.22  |
| -1 | 8 | -1 | 4.26    | 0.84  |
| -1 | 8 | -1 | 3.22    | 0.85  |
| -1 | 8 | -1 | 3.06    | 0.95  |
| -1 | 8 | -1 | 4.15    | 1.39  |
| -1 | 8 | -1 | 3.29    | 1.53  |
| -1 | 8 | -1 | 2.64    | 0.81  |
| -1 | 8 | -1 | 2.65    | 1.00  |
| -1 | 8 | 0  | 1455.42 | 17.67 |
| -1 | 8 | 0  | 1443.69 | 18.57 |
| -1 | 8 | 0  | 1527.30 | 20.19 |
| -1 | 8 | 0  | 1564.64 | 20.69 |
| -1 | 8 | 0  | 1335.38 | 17.87 |
| -1 | 8 | 0  | 1480.27 | 20.42 |
| -1 | 8 | 0  | 1459.75 | 16.78 |
| -1 | 8 | 0  | 1379.24 | 20.15 |
| -1 | 8 | 0  | 1496.91 | 17.20 |
| -1 | 8 | 0  | 1425.55 | 19.29 |
| -1 | 8 | 0  | 1473.68 | 20.73 |
| -1 | 8 | 1  | 16.87   | 1.70  |
| -1 | 8 | 1  | 17.63   | 2.17  |
| -1 | 8 | 1  | 21.82   | 2.38  |
| -1 | 8 | 1  | 17.29   | 1.99  |
| -1 | 8 | 1  | 18.00   | 2.16  |
| -1 | 8 | 1  | 19.55   | 1.75  |
| -1 | 8 | 1  | 20.17   | 2.39  |
| -1 | 8 | 1  | 19.50   | 1.62  |
| -1 | 8 | 1  | 18.17   | 1.55  |
| -1 | 8 | 1  | 16.93   | 2.13  |
| -1 | 8 | 2  | 381.93  | 7.76  |
| -1 | 8 | 2  | 363.45  | 7.35  |
| -1 | 8 | 2  | 348.77  | 8.50  |
| -1 | 8 | 2  | 343.44  | 8.59  |
| -1 | 8 | 2  | 329.59  | 7.94  |
| -1 | 8 | 2  | 376.09  | 8.97  |
| -1 | 8 | 2  | 364.01  | 9.35  |
| -1 | 8 | 2  | 365.25  | 7.01  |

## CIF 31

|    |   |   |        |      |
|----|---|---|--------|------|
| -1 | 8 | 2 | 349.49 | 8.92 |
| -1 | 8 | 2 | 353.64 | 6.89 |
| -1 | 8 | 2 | 339.88 | 8.80 |
| -1 | 8 | 3 | 94.76  | 3.80 |
| -1 | 8 | 3 | 79.89  | 3.92 |
| -1 | 8 | 3 | 93.96  | 3.68 |
| -1 | 8 | 3 | 85.69  | 3.79 |
| -1 | 8 | 3 | 95.89  | 4.38 |
| -1 | 8 | 3 | 105.84 | 3.71 |
| -1 | 8 | 3 | 79.89  | 3.88 |
| -1 | 8 | 3 | 87.36  | 4.45 |
| -1 | 8 | 3 | 90.19  | 3.31 |
| -1 | 8 | 3 | 89.29  | 4.58 |
| -1 | 8 | 4 | 202.02 | 6.77 |
| -1 | 8 | 4 | 194.14 | 5.43 |
| -1 | 8 | 4 | 204.95 | 5.52 |
| -1 | 8 | 4 | 159.73 | 5.66 |
| -1 | 8 | 4 | 172.12 | 6.37 |
| -1 | 8 | 4 | 207.46 | 5.28 |
| -1 | 8 | 4 | 181.43 | 6.16 |
| -1 | 8 | 4 | 190.73 | 4.87 |
| -1 | 8 | 4 | 167.67 | 6.32 |
| -1 | 8 | 5 | 139.98 | 4.88 |
| -1 | 8 | 5 | 158.66 | 5.89 |
| -1 | 8 | 5 | 144.06 | 5.40 |
| -1 | 8 | 5 | 166.25 | 4.94 |
| -1 | 8 | 5 | 166.86 | 4.93 |
| -1 | 8 | 5 | 140.56 | 5.65 |
| -1 | 8 | 5 | 158.86 | 4.64 |
| -1 | 8 | 5 | 128.53 | 5.01 |
| -1 | 8 | 6 | 335.43 | 8.16 |
| -1 | 8 | 6 | 319.31 | 7.42 |
| -1 | 8 | 6 | 368.83 | 7.36 |
| -1 | 8 | 6 | 313.17 | 8.08 |
| -1 | 8 | 6 | 374.77 | 7.15 |
| -1 | 8 | 6 | 330.72 | 8.44 |
| -1 | 8 | 7 | 425.50 | 8.51 |
| -1 | 8 | 7 | 407.70 | 9.08 |
| -1 | 8 | 7 | 392.75 | 8.25 |
| -1 | 8 | 7 | 449.37 | 8.87 |
| -1 | 8 | 7 | 435.66 | 9.07 |

## CIF 31

|    |   |     |         |       |
|----|---|-----|---------|-------|
| -1 | 8 | 8   | 68.18   | 3.22  |
| -1 | 8 | 8   | 67.04   | 2.82  |
| -1 | 8 | 9   | 9.76    | 1.11  |
| -1 | 9 | -13 | 48.43   | 2.07  |
| -1 | 9 | -13 | 49.55   | 1.83  |
| -1 | 9 | -12 | -0.28   | 0.81  |
| -1 | 9 | -12 | 0.90    | 0.63  |
| -1 | 9 | -12 | 1.67    | 0.80  |
| -1 | 9 | -11 | 4.92    | 1.59  |
| -1 | 9 | -11 | 4.39    | 1.27  |
| -1 | 9 | -11 | 5.06    | 1.26  |
| -1 | 9 | -11 | 5.36    | 1.28  |
| -1 | 9 | -10 | 501.03  | 11.16 |
| -1 | 9 | -10 | 531.27  | 11.05 |
| -1 | 9 | -10 | 542.82  | 11.03 |
| -1 | 9 | -10 | 507.83  | 10.12 |
| -1 | 9 | -10 | 491.77  | 10.46 |
| -1 | 9 | -10 | 571.96  | 8.82  |
| -1 | 9 | -9  | 5.63    | 1.50  |
| -1 | 9 | -9  | 6.26    | 1.67  |
| -1 | 9 | -9  | 10.29   | 1.62  |
| -1 | 9 | -9  | 9.74    | 1.94  |
| -1 | 9 | -9  | 8.52    | 1.82  |
| -1 | 9 | -9  | 11.30   | 1.66  |
| -1 | 9 | -8  | 1509.87 | 22.42 |
| -1 | 9 | -8  | 1654.23 | 21.86 |
| -1 | 9 | -8  | 1742.43 | 22.04 |
| -1 | 9 | -8  | 1695.01 | 21.40 |
| -1 | 9 | -8  | 1694.99 | 23.12 |
| -1 | 9 | -8  | 1622.89 | 23.37 |
| -1 | 9 | -8  | 1439.30 | 19.95 |
| -1 | 9 | -7  | 238.03  | 7.14  |
| -1 | 9 | -7  | 273.68  | 7.95  |
| -1 | 9 | -7  | 270.13  | 6.52  |
| -1 | 9 | -7  | 300.04  | 8.12  |
| -1 | 9 | -7  | 290.36  | 7.92  |
| -1 | 9 | -7  | 282.21  | 8.08  |
| -1 | 9 | -7  | 267.34  | 8.18  |
| -1 | 9 | -7  | 250.02  | 6.55  |
| -1 | 9 | -6  | 649.02  | 12.67 |
| -1 | 9 | -6  | 659.04  | 11.59 |



## CIF 31

|    |   |    |        |       |
|----|---|----|--------|-------|
| -1 | 9 | -6 | 666.25 | 10.80 |
| -1 | 9 | -6 | 624.28 | 12.51 |
| -1 | 9 | -6 | 643.07 | 10.79 |
| -1 | 9 | -6 | 621.70 | 12.75 |
| -1 | 9 | -6 | 609.47 | 12.81 |
| -1 | 9 | -5 | 736.54 | 14.08 |
| -1 | 9 | -5 | 813.68 | 13.50 |
| -1 | 9 | -5 | 766.77 | 14.27 |
| -1 | 9 | -5 | 804.67 | 14.55 |
| -1 | 9 | -5 | 766.21 | 13.65 |
| -1 | 9 | -5 | 787.29 | 12.08 |
| -1 | 9 | -5 | 746.50 | 13.19 |
| -1 | 9 | -5 | 744.71 | 14.16 |
| -1 | 9 | -5 | 712.86 | 11.46 |
| -1 | 9 | -5 | 782.62 | 13.01 |
| -1 | 9 | -4 | 449.10 | 9.97  |
| -1 | 9 | -4 | 439.77 | 10.22 |
| -1 | 9 | -4 | 451.30 | 10.54 |
| -1 | 9 | -4 | 453.23 | 10.16 |
| -1 | 9 | -4 | 390.60 | 8.76  |
| -1 | 9 | -4 | 414.30 | 8.48  |
| -1 | 9 | -4 | 440.15 | 10.66 |
| -1 | 9 | -4 | 452.63 | 9.93  |
| -1 | 9 | -4 | 428.41 | 8.06  |
| -1 | 9 | -4 | 440.59 | 8.57  |
| -1 | 9 | -4 | 405.89 | 9.83  |
| -1 | 9 | -4 | 438.13 | 9.61  |
| -1 | 9 | -3 | 59.22  | 3.55  |
| -1 | 9 | -3 | 58.53  | 3.20  |
| -1 | 9 | -3 | 48.06  | 3.61  |
| -1 | 9 | -3 | 53.86  | 3.60  |
| -1 | 9 | -3 | 57.72  | 3.60  |
| -1 | 9 | -3 | 56.04  | 3.51  |
| -1 | 9 | -3 | 55.97  | 2.89  |
| -1 | 9 | -3 | 51.48  | 3.25  |
| -1 | 9 | -3 | 56.33  | 3.18  |
| -1 | 9 | -3 | 53.53  | 2.59  |
| -1 | 9 | -3 | 55.66  | 3.49  |
| -1 | 9 | -3 | 54.57  | 3.81  |
| -1 | 9 | -2 | 5.60   | 1.44  |
| -1 | 9 | -2 | 4.72   | 1.40  |

## CIF 31

|    |   |    |        |      |
|----|---|----|--------|------|
| -1 | 9 | -2 | 4.28   | 1.14 |
| -1 | 9 | -2 | 6.24   | 1.73 |
| -1 | 9 | -2 | 7.47   | 1.86 |
| -1 | 9 | -2 | 5.52   | 1.66 |
| -1 | 9 | -2 | 5.14   | 0.97 |
| -1 | 9 | -2 | 6.77   | 1.54 |
| -1 | 9 | -2 | 4.63   | 1.16 |
| -1 | 9 | -2 | 4.64   | 1.63 |
| -1 | 9 | -2 | 8.16   | 1.37 |
| -1 | 9 | -1 | 30.40  | 2.42 |
| -1 | 9 | -1 | 37.21  | 3.15 |
| -1 | 9 | -1 | 33.60  | 2.75 |
| -1 | 9 | -1 | 30.40  | 2.35 |
| -1 | 9 | -1 | 31.93  | 3.06 |
| -1 | 9 | -1 | 32.37  | 2.79 |
| -1 | 9 | -1 | 30.47  | 2.39 |
| -1 | 9 | -1 | 27.36  | 1.86 |
| -1 | 9 | -1 | 32.19  | 2.74 |
| -1 | 9 | -1 | 27.56  | 2.11 |
| -1 | 9 | -1 | 34.52  | 3.04 |
| -1 | 9 | -1 | 27.17  | 1.89 |
| -1 | 9 | -1 | 31.01  | 2.45 |
| -1 | 9 | 0  | 1.04   | 0.93 |
| -1 | 9 | 0  | 0.62   | 1.38 |
| -1 | 9 | 0  | 1.36   | 0.90 |
| -1 | 9 | 0  | 1.41   | 1.30 |
| -1 | 9 | 0  | 0.64   | 0.88 |
| -1 | 9 | 0  | 0.68   | 1.38 |
| -1 | 9 | 0  | 3.33   | 1.32 |
| -1 | 9 | 0  | 0.58   | 1.23 |
| -1 | 9 | 0  | 1.03   | 0.78 |
| -1 | 9 | 0  | 0.47   | 1.45 |
| -1 | 9 | 0  | 0.89   | 0.68 |
| -1 | 9 | 0  | 0.11   | 1.00 |
| -1 | 9 | 1  | 104.24 | 4.95 |
| -1 | 9 | 1  | 114.87 | 4.24 |
| -1 | 9 | 1  | 105.96 | 4.84 |
| -1 | 9 | 1  | 91.68  | 4.66 |
| -1 | 9 | 1  | 106.84 | 4.58 |
| -1 | 9 | 1  | 91.26  | 4.69 |
| -1 | 9 | 1  | 110.97 | 3.77 |

## CIF 31

|    |   |   |        |      |
|----|---|---|--------|------|
| -1 | 9 | 1 | 107.06 | 4.89 |
| -1 | 9 | 1 | 90.52  | 4.72 |
| -1 | 9 | 1 | 96.68  | 4.56 |
| -1 | 9 | 1 | 110.83 | 4.07 |
| -1 | 9 | 2 | 25.39  | 2.04 |
| -1 | 9 | 2 | 22.95  | 2.58 |
| -1 | 9 | 2 | 23.77  | 2.04 |
| -1 | 9 | 2 | 20.10  | 2.24 |
| -1 | 9 | 2 | 21.02  | 2.07 |
| -1 | 9 | 2 | 20.19  | 2.25 |
| -1 | 9 | 2 | 21.19  | 2.50 |
| -1 | 9 | 2 | 22.39  | 1.77 |
| -1 | 9 | 2 | 24.19  | 2.48 |
| -1 | 9 | 2 | 21.73  | 2.49 |
| -1 | 9 | 2 | 22.37  | 2.42 |
| -1 | 9 | 3 | 173.08 | 5.05 |
| -1 | 9 | 3 | 144.89 | 5.08 |
| -1 | 9 | 3 | 165.20 | 5.67 |
| -1 | 9 | 3 | 161.53 | 5.04 |
| -1 | 9 | 3 | 166.74 | 4.60 |
| -1 | 9 | 3 | 138.17 | 4.96 |
| -1 | 9 | 3 | 147.38 | 5.67 |
| -1 | 9 | 3 | 157.62 | 5.94 |
| -1 | 9 | 4 | 0.10   | 0.95 |
| -1 | 9 | 4 | 0.06   | 1.16 |
| -1 | 9 | 4 | 0.45   | 0.74 |
| -1 | 9 | 4 | 0.84   | 0.81 |
| -1 | 9 | 4 | 0.72   | 1.35 |
| -1 | 9 | 4 | 0.37   | 1.11 |
| -1 | 9 | 4 | 1.04   | 0.72 |
| -1 | 9 | 4 | 0.33   | 1.01 |
| -1 | 9 | 4 | 1.45   | 1.23 |
| -1 | 9 | 5 | 163.11 | 5.49 |
| -1 | 9 | 5 | 130.64 | 4.69 |
| -1 | 9 | 5 | 149.34 | 5.43 |
| -1 | 9 | 5 | 154.92 | 4.58 |
| -1 | 9 | 5 | 147.87 | 5.29 |
| -1 | 9 | 5 | 139.12 | 4.66 |
| -1 | 9 | 6 | 20.67  | 1.89 |
| -1 | 9 | 6 | 17.86  | 1.55 |
| -1 | 9 | 6 | 22.09  | 2.10 |

## CIF 31

|    |    |     |        |      |
|----|----|-----|--------|------|
| -1 | 9  | 6   | 21.76  | 1.95 |
| -1 | 9  | 6   | 25.50  | 2.18 |
| -1 | 9  | 6   | 21.48  | 2.02 |
| -1 | 9  | 7   | 227.27 | 5.42 |
| -1 | 9  | 7   | 218.93 | 5.04 |
| -1 | 9  | 8   | 12.87  | 1.17 |
| -1 | 10 | -12 | 83.73  | 2.10 |
| -1 | 10 | -12 | 96.73  | 2.55 |
| -1 | 10 | -11 | 21.22  | 1.65 |
| -1 | 10 | -11 | 21.08  | 1.80 |
| -1 | 10 | -11 | 20.79  | 1.75 |
| -1 | 10 | -11 | 20.86  | 1.33 |
| -1 | 10 | -10 | 5.34   | 1.39 |
| -1 | 10 | -10 | 4.34   | 1.32 |
| -1 | 10 | -10 | 7.65   | 1.05 |
| -1 | 10 | -10 | 4.16   | 1.13 |
| -1 | 10 | -9  | 54.38  | 3.20 |
| -1 | 10 | -9  | 67.25  | 3.76 |
| -1 | 10 | -9  | 58.55  | 3.00 |
| -1 | 10 | -9  | 66.47  | 2.70 |
| -1 | 10 | -9  | 56.39  | 2.98 |
| -1 | 10 | -9  | 57.61  | 3.44 |
| -1 | 10 | -8  | 44.90  | 2.93 |
| -1 | 10 | -8  | 49.63  | 2.93 |
| -1 | 10 | -8  | 53.46  | 3.13 |
| -1 | 10 | -8  | 50.65  | 3.30 |
| -1 | 10 | -8  | 49.16  | 3.40 |
| -1 | 10 | -8  | 53.90  | 2.93 |
| -1 | 10 | -7  | 18.57  | 1.97 |
| -1 | 10 | -7  | 22.96  | 2.45 |
| -1 | 10 | -7  | 23.07  | 2.42 |
| -1 | 10 | -7  | 20.67  | 2.25 |
| -1 | 10 | -7  | 20.24  | 1.92 |
| -1 | 10 | -7  | 18.02  | 2.36 |
| -1 | 10 | -6  | 100.02 | 4.87 |
| -1 | 10 | -6  | 99.05  | 4.80 |
| -1 | 10 | -6  | 93.61  | 4.28 |
| -1 | 10 | -6  | 98.81  | 4.88 |
| -1 | 10 | -6  | 100.65 | 3.84 |
| -1 | 10 | -5  | 49.31  | 3.20 |
| -1 | 10 | -5  | 53.19  | 3.74 |

## CIF 31

|    |    |    |        |      |
|----|----|----|--------|------|
| -1 | 10 | -5 | 54.97  | 3.78 |
| -1 | 10 | -5 | 51.82  | 2.83 |
| -1 | 10 | -5 | 51.44  | 3.50 |
| -1 | 10 | -5 | 50.25  | 2.63 |
| -1 | 10 | -5 | 47.18  | 2.89 |
| -1 | 10 | -5 | 49.50  | 3.06 |
| -1 | 10 | -4 | 248.64 | 6.56 |
| -1 | 10 | -4 | 268.88 | 8.04 |
| -1 | 10 | -4 | 244.32 | 7.94 |
| -1 | 10 | -4 | 270.37 | 7.50 |
| -1 | 10 | -4 | 248.90 | 7.57 |
| -1 | 10 | -4 | 262.49 | 6.45 |
| -1 | 10 | -4 | 273.86 | 7.45 |
| -1 | 10 | -3 | 5.03   | 1.14 |
| -1 | 10 | -3 | 4.07   | 1.18 |
| -1 | 10 | -3 | 1.88   | 1.13 |
| -1 | 10 | -3 | 5.47   | 1.53 |
| -1 | 10 | -3 | 2.76   | 1.19 |
| -1 | 10 | -3 | 3.23   | 1.18 |
| -1 | 10 | -3 | 2.74   | 1.43 |
| -1 | 10 | -2 | 28.46  | 2.84 |
| -1 | 10 | -2 | 29.77  | 2.50 |
| -1 | 10 | -2 | 31.95  | 2.38 |
| -1 | 10 | -2 | 28.45  | 2.94 |
| -1 | 10 | -2 | 25.71  | 2.94 |
| -1 | 10 | -2 | 31.13  | 2.82 |
| -1 | 10 | -2 | 22.62  | 2.16 |
| -1 | 10 | -2 | 34.28  | 2.32 |
| -1 | 10 | -2 | 26.31  | 2.40 |
| -1 | 10 | -2 | 27.07  | 2.65 |
| -1 | 10 | -1 | 136.26 | 5.84 |
| -1 | 10 | -1 | 137.13 | 5.29 |
| -1 | 10 | -1 | 133.97 | 5.57 |
| -1 | 10 | -1 | 129.39 | 5.29 |
| -1 | 10 | -1 | 133.34 | 5.50 |
| -1 | 10 | -1 | 132.78 | 5.27 |
| -1 | 10 | -1 | 134.14 | 4.48 |
| -1 | 10 | -1 | 137.85 | 4.75 |
| -1 | 10 | -1 | 128.81 | 5.39 |
| -1 | 10 | -1 | 125.68 | 4.65 |
| -1 | 10 | 0  | 153.80 | 5.65 |

## CIF 31

|    |    |   |        |      |
|----|----|---|--------|------|
| -1 | 10 | 0 | 154.95 | 4.96 |
| -1 | 10 | 0 | 145.41 | 5.65 |
| -1 | 10 | 0 | 148.42 | 5.92 |
| -1 | 10 | 0 | 148.21 | 5.46 |
| -1 | 10 | 0 | 132.62 | 4.71 |
| -1 | 10 | 0 | 149.46 | 5.68 |
| -1 | 10 | 0 | 154.51 | 4.76 |
| -1 | 10 | 0 | 159.00 | 5.98 |
| -1 | 10 | 0 | 145.72 | 5.21 |
| -1 | 10 | 1 | 158.70 | 5.74 |
| -1 | 10 | 1 | 147.44 | 5.54 |
| -1 | 10 | 1 | 148.90 | 4.77 |
| -1 | 10 | 1 | 141.12 | 5.34 |
| -1 | 10 | 1 | 143.06 | 5.49 |
| -1 | 10 | 1 | 144.93 | 5.60 |
| -1 | 10 | 1 | 140.43 | 5.56 |
| -1 | 10 | 1 | 154.23 | 4.69 |
| -1 | 10 | 1 | 143.01 | 5.20 |
| -1 | 10 | 2 | 126.87 | 4.87 |
| -1 | 10 | 2 | 129.79 | 5.13 |
| -1 | 10 | 2 | 126.59 | 4.24 |
| -1 | 10 | 2 | 114.02 | 4.40 |
| -1 | 10 | 2 | 115.77 | 4.60 |
| -1 | 10 | 2 | 114.21 | 4.51 |
| -1 | 10 | 2 | 128.00 | 5.16 |
| -1 | 10 | 2 | 118.03 | 4.92 |
| -1 | 10 | 2 | 121.09 | 4.81 |
| -1 | 10 | 3 | 347.59 | 8.25 |
| -1 | 10 | 3 | 350.18 | 7.75 |
| -1 | 10 | 3 | 340.32 | 7.87 |
| -1 | 10 | 3 | 332.59 | 7.88 |
| -1 | 10 | 3 | 352.82 | 8.19 |
| -1 | 10 | 4 | 21.87  | 1.79 |
| -1 | 10 | 4 | 24.25  | 2.19 |
| -1 | 10 | 4 | 19.63  | 1.87 |
| -1 | 10 | 4 | 21.45  | 1.99 |
| -1 | 10 | 4 | 20.15  | 1.96 |
| -1 | 10 | 4 | 18.76  | 1.77 |
| -1 | 10 | 4 | 23.65  | 2.09 |
| -1 | 10 | 5 | 390.45 | 7.48 |
| -1 | 10 | 5 | 387.35 | 7.46 |

## CIF 31

|    |    |     |        |      |
|----|----|-----|--------|------|
| -1 | 10 | 5   | 381.38 | 7.21 |
| -1 | 10 | 6   | 38.85  | 1.92 |
| -1 | 11 | -11 | 3.88   | 0.72 |
| -1 | 11 | -11 | 5.04   | 0.57 |
| -1 | 11 | -10 | 209.75 | 5.25 |
| -1 | 11 | -10 | 213.26 | 5.25 |
| -1 | 11 | -9  | 3.32   | 0.78 |
| -1 | 11 | -9  | 6.07   | 1.40 |
| -1 | 11 | -9  | 6.54   | 1.43 |
| -1 | 11 | -9  | 6.19   | 0.91 |
| -1 | 11 | -8  | 26.46  | 1.70 |
| -1 | 11 | -8  | 35.02  | 2.36 |
| -1 | 11 | -8  | 35.77  | 2.70 |
| -1 | 11 | -8  | 32.29  | 2.24 |
| -1 | 11 | -8  | 28.43  | 2.39 |
| -1 | 11 | -7  | 78.36  | 3.78 |
| -1 | 11 | -7  | 68.00  | 3.48 |
| -1 | 11 | -7  | 69.20  | 3.63 |
| -1 | 11 | -6  | 2.87   | 1.49 |
| -1 | 11 | -6  | 1.22   | 1.33 |
| -1 | 11 | -6  | 1.54   | 1.12 |
| -1 | 11 | -5  | 381.62 | 9.09 |
| -1 | 11 | -5  | 377.15 | 9.07 |
| -1 | 11 | -5  | 348.10 | 8.39 |
| -1 | 11 | -5  | 345.72 | 7.58 |
| -1 | 11 | -4  | 196.36 | 6.00 |
| -1 | 11 | -4  | 200.31 | 6.59 |
| -1 | 11 | -4  | 180.89 | 6.35 |
| -1 | 11 | -4  | 180.74 | 5.64 |
| -1 | 11 | -3  | 22.76  | 2.03 |
| -1 | 11 | -3  | 26.24  | 2.30 |
| -1 | 11 | -2  | 288.02 | 6.84 |
| -1 | 11 | -2  | 298.37 | 8.06 |
| -1 | 11 | -2  | 282.58 | 7.87 |
| -1 | 11 | -2  | 276.03 | 6.82 |
| -1 | 11 | -2  | 307.27 | 7.74 |
| -1 | 11 | -2  | 280.26 | 7.47 |
| -1 | 11 | -2  | 274.66 | 6.27 |
| -1 | 11 | -1  | 3.28   | 1.17 |
| -1 | 11 | -1  | 4.47   | 1.55 |
| -1 | 11 | -1  | 4.56   | 1.57 |

## CIF 31

|    |    |    |        |      |
|----|----|----|--------|------|
| -1 | 11 | -1 | 5.37   | 1.60 |
| -1 | 11 | -1 | 3.66   | 1.23 |
| -1 | 11 | -1 | 4.29   | 1.32 |
| -1 | 11 | -1 | 4.01   | 1.25 |
| -1 | 11 | 0  | 31.40  | 2.58 |
| -1 | 11 | 0  | 32.08  | 2.52 |
| -1 | 11 | 0  | 33.36  | 2.65 |
| -1 | 11 | 0  | 35.11  | 2.54 |
| -1 | 11 | 0  | 34.79  | 2.56 |
| -1 | 11 | 0  | 33.30  | 2.60 |
| -1 | 11 | 0  | 34.18  | 2.49 |
| -1 | 11 | 1  | 41.49  | 2.66 |
| -1 | 11 | 1  | 35.10  | 2.34 |
| -1 | 11 | 1  | 35.26  | 2.39 |
| -1 | 11 | 1  | 44.09  | 2.72 |
| -1 | 11 | 1  | 35.68  | 2.53 |
| -1 | 11 | 1  | 35.86  | 2.57 |
| -1 | 11 | 1  | 39.46  | 2.52 |
| -1 | 11 | 1  | 35.98  | 2.28 |
| -1 | 11 | 2  | 373.50 | 7.40 |
| -1 | 11 | 2  | 383.96 | 7.80 |
| -1 | 11 | 2  | 377.16 | 7.77 |
| -1 | 11 | 2  | 341.10 | 6.36 |
| -1 | 11 | 2  | 354.19 | 7.58 |
| -1 | 11 | 2  | 394.62 | 7.73 |
| -1 | 11 | 3  | 3.52   | 1.05 |
| -1 | 11 | 3  | 1.51   | 0.78 |
| -1 | 11 | 3  | 2.00   | 0.98 |
| -1 | 11 | 3  | 1.78   | 0.99 |
| -1 | 11 | 4  | 517.15 | 7.55 |
| -1 | 11 | 4  | 540.18 | 7.65 |
| -1 | 12 | -9 | 214.83 | 4.68 |
| -1 | 12 | -9 | 209.78 | 3.35 |
| -1 | 12 | -8 | 239.19 | 5.54 |
| -1 | 12 | -8 | 248.62 | 4.12 |
| -1 | 12 | -7 | 60.05  | 3.03 |
| -1 | 12 | -7 | 60.14  | 2.72 |
| -1 | 12 | -7 | 56.84  | 2.93 |
| -1 | 12 | -7 | 60.85  | 2.74 |
| -1 | 12 | -6 | 83.62  | 3.62 |
| -1 | 12 | -6 | 79.87  | 3.39 |



## CIF 31

|    |     |    |        |      |
|----|-----|----|--------|------|
| -1 | 12  | -6 | 80.06  | 3.48 |
| -1 | 12  | -6 | 82.53  | 3.49 |
| -1 | 12  | -5 | 61.53  | 3.11 |
| -1 | 12  | -5 | 61.95  | 3.19 |
| -1 | 12  | -4 | 178.48 | 4.71 |
| -1 | 12  | -4 | 175.08 | 5.29 |
| -1 | 12  | -4 | 187.91 | 5.61 |
| -1 | 12  | -3 | 5.12   | 1.19 |
| -1 | 12  | -3 | 3.84   | 1.03 |
| -1 | 12  | -3 | 5.13   | 1.29 |
| -1 | 12  | -3 | 5.40   | 1.48 |
| -1 | 12  | -2 | 1.31   | 1.02 |
| -1 | 12  | -2 | 1.73   | 1.12 |
| -1 | 12  | -2 | 1.96   | 1.02 |
| -1 | 12  | -2 | 2.00   | 0.94 |
| -1 | 12  | -1 | 53.99  | 2.75 |
| -1 | 12  | -1 | 49.70  | 2.55 |
| -1 | 12  | -1 | 49.87  | 2.65 |
| -1 | 12  | -1 | 54.32  | 2.30 |
| -1 | 12  | 0  | 26.31  | 1.67 |
| -1 | 12  | 0  | 26.03  | 1.89 |
| -1 | 12  | 0  | 26.40  | 1.65 |
| -1 | 12  | 0  | 21.34  | 1.55 |
| -1 | 12  | 0  | 26.55  | 1.82 |
| -1 | 12  | 0  | 23.09  | 1.46 |
| -1 | 12  | 1  | 1.06   | 0.65 |
| -1 | 12  | 1  | 0.11   | 0.82 |
| -1 | 12  | 1  | 0.10   | 0.58 |
| 0  | -12 | 0  | 307.19 | 4.26 |
| 0  | -12 | 1  | 31.18  | 1.20 |
| 0  | -12 | 1  | 28.06  | 1.24 |
| 0  | -12 | 2  | 44.91  | 1.82 |
| 0  | -12 | 2  | 43.06  | 1.57 |
| 0  | -12 | 3  | 142.19 | 3.12 |
| 0  | -12 | 4  | 34.39  | 1.56 |
| 0  | -12 | 4  | 31.61  | 1.53 |
| 0  | -12 | 5  | 0.32   | 0.57 |
| 0  | -12 | 5  | 0.96   | 0.59 |
| 0  | -12 | 6  | 49.11  | 1.73 |
| 0  | -12 | 6  | 44.64  | 1.79 |
| 0  | -12 | 6  | 44.73  | 1.98 |

## CIF 31

|   |     |    |        |      |
|---|-----|----|--------|------|
| 0 | -12 | 7  | 13.04  | 0.84 |
| 0 | -12 | 7  | 16.55  | 1.10 |
| 0 | -12 | 7  | 15.12  | 1.18 |
| 0 | -12 | 8  | 25.57  | 1.21 |
| 0 | -12 | 8  | 29.81  | 1.43 |
| 0 | -11 | -2 | 65.79  | 1.98 |
| 0 | -11 | -2 | 52.06  | 1.96 |
| 0 | -11 | -1 | 492.03 | 6.96 |
| 0 | -11 | -1 | 417.89 | 7.00 |
| 0 | -11 | 0  | 5.30   | 0.99 |
| 0 | -11 | 0  | 5.97   | 0.99 |
| 0 | -11 | 0  | 4.78   | 0.79 |
| 0 | -11 | 1  | 27.08  | 1.62 |
| 0 | -11 | 1  | 22.22  | 1.42 |
| 0 | -11 | 2  | 6.31   | 1.16 |
| 0 | -11 | 2  | 6.86   | 0.96 |
| 0 | -11 | 2  | 6.23   | 0.98 |
| 0 | -11 | 2  | 6.02   | 1.12 |
| 0 | -11 | 3  | 85.75  | 3.02 |
| 0 | -11 | 3  | 78.96  | 3.09 |
| 0 | -11 | 3  | 81.61  | 3.40 |
| 0 | -11 | 4  | 119.57 | 4.13 |
| 0 | -11 | 4  | 110.75 | 3.98 |
| 0 | -11 | 5  | 63.63  | 2.58 |
| 0 | -11 | 5  | 62.21  | 2.80 |
| 0 | -11 | 5  | 65.46  | 3.02 |
| 0 | -11 | 5  | 59.40  | 2.93 |
| 0 | -11 | 6  | 5.18   | 0.99 |
| 0 | -11 | 6  | 9.97   | 1.12 |
| 0 | -11 | 6  | 6.21   | 1.12 |
| 0 | -11 | 6  | 5.80   | 1.19 |
| 0 | -11 | 6  | 6.05   | 1.23 |
| 0 | -11 | 7  | 8.82   | 1.00 |
| 0 | -11 | 7  | 8.77   | 1.01 |
| 0 | -11 | 7  | 8.31   | 1.24 |
| 0 | -11 | 7  | 7.80   | 1.14 |
| 0 | -11 | 8  | 4.41   | 0.80 |
| 0 | -11 | 8  | 4.29   | 0.96 |
| 0 | -11 | 8  | 6.07   | 1.06 |
| 0 | -11 | 8  | 3.88   | 0.69 |
| 0 | -11 | 9  | 6.19   | 0.79 |

## CIF 31

|   |     |    |        |       |
|---|-----|----|--------|-------|
| 0 | -11 | 9  | 6.15   | 0.97  |
| 0 | -11 | 9  | 5.69   | 0.98  |
| 0 | -11 | 10 | 74.68  | 2.37  |
| 0 | -11 | 10 | 72.26  | 2.43  |
| 0 | -11 | 11 | 27.69  | 1.25  |
| 0 | -11 | 11 | 26.88  | 1.25  |
| 0 | -10 | -5 | 86.15  | 2.05  |
| 0 | -10 | -4 | 4.47   | 0.71  |
| 0 | -10 | -3 | 29.61  | 1.64  |
| 0 | -10 | -3 | 27.94  | 1.84  |
| 0 | -10 | -3 | 29.42  | 1.52  |
| 0 | -10 | -2 | 58.69  | 2.52  |
| 0 | -10 | -2 | 56.13  | 2.75  |
| 0 | -10 | -2 | 55.58  | 2.38  |
| 0 | -10 | -2 | 54.56  | 2.08  |
| 0 | -10 | -1 | 567.86 | 8.98  |
| 0 | -10 | -1 | 591.53 | 10.01 |
| 0 | -10 | -1 | 597.59 | 8.42  |
| 0 | -10 | 0  | 134.34 | 4.18  |
| 0 | -10 | 0  | 129.36 | 4.65  |
| 0 | -10 | 1  | 493.90 | 8.98  |
| 0 | -10 | 1  | 487.19 | 9.60  |
| 0 | -10 | 2  | 0.43   | 0.73  |
| 0 | -10 | 2  | 0.96   | 0.98  |
| 0 | -10 | 2  | 1.05   | 1.05  |
| 0 | -10 | 2  | 0.24   | 1.00  |
| 0 | -10 | 2  | 1.16   | 0.73  |
| 0 | -10 | 3  | 113.16 | 4.24  |
| 0 | -10 | 3  | 114.55 | 4.18  |
| 0 | -10 | 3  | 110.58 | 4.35  |
| 0 | -10 | 3  | 112.14 | 4.08  |
| 0 | -10 | 4  | 32.14  | 2.13  |
| 0 | -10 | 4  | 33.21  | 2.37  |
| 0 | -10 | 4  | 37.72  | 2.46  |
| 0 | -10 | 4  | 34.91  | 2.51  |
| 0 | -10 | 4  | 35.89  | 2.18  |
| 0 | -10 | 4  | 38.87  | 2.50  |
| 0 | -10 | 5  | 16.75  | 1.78  |
| 0 | -10 | 5  | 19.03  | 1.71  |
| 0 | -10 | 5  | 22.02  | 1.84  |
| 0 | -10 | 5  | 20.92  | 1.93  |

## CIF 31

|   |     |    |        |      |
|---|-----|----|--------|------|
| 0 | -10 | 5  | 19.48  | 1.96 |
| 0 | -10 | 5  | 15.93  | 1.92 |
| 0 | -10 | 5  | 18.75  | 1.83 |
| 0 | -10 | 6  | 56.14  | 2.89 |
| 0 | -10 | 6  | 67.22  | 2.94 |
| 0 | -10 | 6  | 65.17  | 2.78 |
| 0 | -10 | 6  | 71.55  | 3.15 |
| 0 | -10 | 6  | 63.75  | 3.26 |
| 0 | -10 | 6  | 59.21  | 3.08 |
| 0 | -10 | 6  | 61.31  | 3.17 |
| 0 | -10 | 7  | 265.47 | 6.11 |
| 0 | -10 | 7  | 265.93 | 6.19 |
| 0 | -10 | 7  | 255.49 | 5.43 |
| 0 | -10 | 7  | 271.96 | 6.43 |
| 0 | -10 | 7  | 253.62 | 5.80 |
| 0 | -10 | 7  | 265.57 | 6.65 |
| 0 | -10 | 8  | 212.53 | 5.22 |
| 0 | -10 | 8  | 223.36 | 5.30 |
| 0 | -10 | 8  | 222.86 | 5.49 |
| 0 | -10 | 8  | 221.82 | 5.63 |
| 0 | -10 | 8  | 230.54 | 4.74 |
| 0 | -10 | 8  | 225.19 | 5.86 |
| 0 | -10 | 8  | 234.98 | 5.56 |
| 0 | -10 | 9  | 385.54 | 6.80 |
| 0 | -10 | 9  | 362.98 | 5.58 |
| 0 | -10 | 9  | 407.55 | 7.39 |
| 0 | -10 | 9  | 394.47 | 7.75 |
| 0 | -10 | 9  | 417.43 | 7.17 |
| 0 | -10 | 9  | 409.68 | 7.63 |
| 0 | -10 | 9  | 424.65 | 7.57 |
| 0 | -10 | 10 | 92.37  | 3.12 |
| 0 | -10 | 10 | 90.05  | 2.98 |
| 0 | -10 | 10 | 84.82  | 3.15 |
| 0 | -10 | 10 | 82.56  | 3.19 |
| 0 | -10 | 10 | 92.48  | 3.34 |
| 0 | -10 | 11 | 3.73   | 0.80 |
| 0 | -10 | 11 | 3.82   | 0.82 |
| 0 | -10 | 11 | 3.22   | 0.88 |
| 0 | -10 | 11 | 3.22   | 0.87 |
| 0 | -10 | 12 | 7.09   | 0.79 |
| 0 | -10 | 12 | 5.66   | 0.80 |

## CIF 31

|   |     |    |         |       |
|---|-----|----|---------|-------|
| 0 | -10 | 12 | 6.21    | 0.82  |
| 0 | -10 | 12 | 5.01    | 0.66  |
| 0 | -9  | -7 | 29.23   | 1.28  |
| 0 | -9  | -7 | 26.28   | 1.34  |
| 0 | -9  | -6 | 26.32   | 1.47  |
| 0 | -9  | -5 | 183.43  | 3.80  |
| 0 | -9  | -5 | 197.82  | 4.39  |
| 0 | -9  | -4 | 5.09    | 0.97  |
| 0 | -9  | -4 | 5.96    | 1.04  |
| 0 | -9  | -4 | 4.92    | 1.10  |
| 0 | -9  | -3 | 768.27  | 11.02 |
| 0 | -9  | -3 | 766.37  | 10.66 |
| 0 | -9  | -3 | 787.28  | 12.33 |
| 0 | -9  | -3 | 742.86  | 11.26 |
| 0 | -9  | -3 | 720.85  | 11.49 |
| 0 | -9  | -2 | 341.65  | 6.48  |
| 0 | -9  | -2 | 341.28  | 7.82  |
| 0 | -9  | -2 | 332.29  | 7.13  |
| 0 | -9  | -2 | 334.01  | 6.16  |
| 0 | -9  | -1 | 26.28   | 1.75  |
| 0 | -9  | -1 | 29.16   | 2.13  |
| 0 | -9  | -1 | 27.35   | 1.82  |
| 0 | -9  | -1 | 24.89   | 2.11  |
| 0 | -9  | -1 | 24.67   | 2.02  |
| 0 | -9  | -1 | 30.94   | 2.43  |
| 0 | -9  | 0  | 43.43   | 2.40  |
| 0 | -9  | 0  | 48.40   | 3.04  |
| 0 | -9  | 0  | 43.45   | 2.62  |
| 0 | -9  | 0  | 40.62   | 2.00  |
| 0 | -9  | 1  | 404.42  | 8.62  |
| 0 | -9  | 1  | 404.79  | 7.80  |
| 0 | -9  | 1  | 427.70  | 8.51  |
| 0 | -9  | 1  | 418.31  | 8.87  |
| 0 | -9  | 1  | 362.73  | 7.72  |
| 0 | -9  | 1  | 372.33  | 7.68  |
| 0 | -9  | 2  | 1531.32 | 19.36 |
| 0 | -9  | 2  | 1516.17 | 19.65 |
| 0 | -9  | 2  | 1583.01 | 18.55 |
| 0 | -9  | 2  | 1512.25 | 19.13 |
| 0 | -9  | 2  | 1549.22 | 19.86 |
| 0 | -9  | 2  | 1539.27 | 18.90 |

## CIF 31

|   |    |   |        |      |
|---|----|---|--------|------|
| 0 | -9 | 3 | 6.55   | 1.31 |
| 0 | -9 | 3 | 4.57   | 1.12 |
| 0 | -9 | 3 | 4.91   | 1.37 |
| 0 | -9 | 3 | 6.20   | 1.18 |
| 0 | -9 | 3 | 8.59   | 1.34 |
| 0 | -9 | 3 | 8.99   | 1.53 |
| 0 | -9 | 3 | 6.77   | 1.37 |
| 0 | -9 | 3 | 5.99   | 1.09 |
| 0 | -9 | 3 | 4.69   | 1.32 |
| 0 | -9 | 3 | 8.09   | 1.35 |
| 0 | -9 | 4 | 63.17  | 3.17 |
| 0 | -9 | 4 | 64.60  | 3.38 |
| 0 | -9 | 4 | 64.20  | 3.04 |
| 0 | -9 | 4 | 67.74  | 3.22 |
| 0 | -9 | 4 | 54.02  | 2.88 |
| 0 | -9 | 4 | 74.69  | 3.19 |
| 0 | -9 | 4 | 62.19  | 3.21 |
| 0 | -9 | 4 | 65.36  | 3.44 |
| 0 | -9 | 4 | 62.07  | 2.72 |
| 0 | -9 | 4 | 67.06  | 3.36 |
| 0 | -9 | 5 | 219.93 | 5.81 |
| 0 | -9 | 5 | 223.24 | 6.10 |
| 0 | -9 | 5 | 208.81 | 5.55 |
| 0 | -9 | 5 | 221.49 | 5.91 |
| 0 | -9 | 5 | 195.26 | 4.92 |
| 0 | -9 | 5 | 209.16 | 5.38 |
| 0 | -9 | 5 | 206.91 | 6.16 |
| 0 | -9 | 5 | 216.03 | 6.00 |
| 0 | -9 | 5 | 203.08 | 6.05 |
| 0 | -9 | 5 | 186.18 | 5.87 |
| 0 | -9 | 5 | 224.97 | 5.56 |
| 0 | -9 | 5 | 226.66 | 6.28 |
| 0 | -9 | 6 | 277.21 | 7.12 |
| 0 | -9 | 6 | 281.56 | 6.93 |
| 0 | -9 | 6 | 292.56 | 6.65 |
| 0 | -9 | 6 | 274.62 | 5.81 |
| 0 | -9 | 6 | 253.61 | 5.85 |
| 0 | -9 | 6 | 294.40 | 6.83 |
| 0 | -9 | 6 | 306.75 | 6.40 |
| 0 | -9 | 6 | 297.95 | 7.42 |
| 0 | -9 | 6 | 290.30 | 7.04 |

## CIF 31

|   |    |    |        |      |
|---|----|----|--------|------|
| 0 | -9 | 6  | 311.66 | 6.85 |
| 0 | -9 | 6  | 301.87 | 7.35 |
| 0 | -9 | 7  | 268.86 | 6.62 |
| 0 | -9 | 7  | 246.92 | 6.07 |
| 0 | -9 | 7  | 242.36 | 6.24 |
| 0 | -9 | 7  | 245.20 | 5.48 |
| 0 | -9 | 7  | 226.49 | 5.50 |
| 0 | -9 | 7  | 238.79 | 5.45 |
| 0 | -9 | 7  | 214.81 | 6.21 |
| 0 | -9 | 7  | 254.46 | 6.46 |
| 0 | -9 | 7  | 247.84 | 6.65 |
| 0 | -9 | 7  | 255.43 | 6.36 |
| 0 | -9 | 7  | 224.64 | 6.35 |
| 0 | -9 | 8  | 133.78 | 4.62 |
| 0 | -9 | 8  | 151.35 | 4.86 |
| 0 | -9 | 8  | 152.45 | 4.27 |
| 0 | -9 | 8  | 162.37 | 4.13 |
| 0 | -9 | 8  | 131.99 | 4.18 |
| 0 | -9 | 8  | 143.95 | 4.76 |
| 0 | -9 | 8  | 156.28 | 5.01 |
| 0 | -9 | 8  | 161.17 | 5.22 |
| 0 | -9 | 8  | 177.32 | 5.22 |
| 0 | -9 | 8  | 166.83 | 5.29 |
| 0 | -9 | 9  | 262.26 | 6.24 |
| 0 | -9 | 9  | 263.52 | 6.45 |
| 0 | -9 | 9  | 249.42 | 5.76 |
| 0 | -9 | 9  | 270.97 | 6.68 |
| 0 | -9 | 9  | 284.86 | 6.98 |
| 0 | -9 | 9  | 295.42 | 6.85 |
| 0 | -9 | 9  | 278.81 | 6.71 |
| 0 | -9 | 10 | 52.91  | 2.52 |
| 0 | -9 | 10 | 40.57  | 2.32 |
| 0 | -9 | 10 | 39.97  | 2.57 |
| 0 | -9 | 10 | 48.22  | 2.70 |
| 0 | -9 | 10 | 44.64  | 2.53 |
| 0 | -9 | 10 | 46.77  | 2.68 |
| 0 | -9 | 10 | 50.58  | 2.72 |
| 0 | -9 | 10 | 35.83  | 2.08 |
| 0 | -9 | 11 | 2.30   | 0.72 |
| 0 | -9 | 11 | 3.47   | 0.85 |
| 0 | -9 | 11 | 2.66   | 0.88 |

## CIF 31

|   |    |    |        |      |
|---|----|----|--------|------|
| 0 | -9 | 11 | 2.96   | 1.11 |
| 0 | -9 | 11 | 3.73   | 1.00 |
| 0 | -9 | 11 | 4.77   | 1.11 |
| 0 | -9 | 11 | 1.95   | 0.85 |
| 0 | -9 | 12 | 35.95  | 1.93 |
| 0 | -9 | 12 | 35.56  | 2.01 |
| 0 | -9 | 12 | 35.96  | 2.01 |
| 0 | -9 | 12 | 36.47  | 2.01 |
| 0 | -9 | 13 | 105.45 | 2.63 |
| 0 | -9 | 13 | 112.53 | 2.84 |
| 0 | -9 | 13 | 111.15 | 2.94 |
| 0 | -8 | -8 | 77.26  | 2.32 |
| 0 | -8 | -8 | 75.22  | 2.49 |
| 0 | -8 | -8 | 80.31  | 2.58 |
| 0 | -8 | -8 | 70.83  | 1.91 |
| 0 | -8 | -7 | 60.98  | 2.12 |
| 0 | -8 | -7 | 64.34  | 2.71 |
| 0 | -8 | -6 | 59.11  | 2.20 |
| 0 | -8 | -6 | 66.69  | 3.07 |
| 0 | -8 | -6 | 57.30  | 2.60 |
| 0 | -8 | -6 | 60.61  | 2.38 |
| 0 | -8 | -5 | 1.74   | 0.75 |
| 0 | -8 | -5 | 2.65   | 0.88 |
| 0 | -8 | -5 | 1.62   | 1.09 |
| 0 | -8 | -5 | 1.84   | 1.03 |
| 0 | -8 | -5 | 1.54   | 1.02 |
| 0 | -8 | -4 | 12.51  | 1.49 |
| 0 | -8 | -4 | 10.76  | 1.39 |
| 0 | -8 | -4 | 10.76  | 1.17 |
| 0 | -8 | -4 | 14.03  | 1.75 |
| 0 | -8 | -4 | 12.12  | 1.49 |
| 0 | -8 | -4 | 10.50  | 1.40 |
| 0 | -8 | -3 | 228.30 | 5.99 |
| 0 | -8 | -3 | 225.12 | 5.45 |
| 0 | -8 | -3 | 206.86 | 4.56 |
| 0 | -8 | -3 | 230.69 | 6.47 |
| 0 | -8 | -3 | 226.41 | 5.96 |
| 0 | -8 | -2 | 120.62 | 4.29 |
| 0 | -8 | -2 | 135.23 | 4.07 |
| 0 | -8 | -2 | 136.04 | 3.89 |
| 0 | -8 | -2 | 115.56 | 4.60 |



## CIF 31

|   |    |    |        |       |
|---|----|----|--------|-------|
| 0 | -8 | -1 | 853.18 | 11.73 |
| 0 | -8 | -1 | 890.99 | 12.13 |
| 0 | -8 | -1 | 870.93 | 13.14 |
| 0 | -8 | -1 | 907.11 | 14.03 |
| 0 | -8 | -1 | 848.01 | 12.92 |
| 0 | -8 | 0  | 27.87  | 2.35  |
| 0 | -8 | 0  | 38.56  | 2.00  |
| 0 | -8 | 0  | 35.42  | 2.16  |
| 0 | -8 | 0  | 27.91  | 2.17  |
| 0 | -8 | 0  | 27.73  | 2.26  |
| 0 | -8 | 0  | 28.74  | 2.09  |
| 0 | -8 | 0  | 29.88  | 1.98  |
| 0 | -8 | 1  | 4.16   | 0.98  |
| 0 | -8 | 1  | 4.95   | 1.27  |
| 0 | -8 | 1  | 8.10   | 1.44  |
| 0 | -8 | 1  | 4.68   | 1.24  |
| 0 | -8 | 1  | 5.38   | 0.89  |
| 0 | -8 | 1  | 6.05   | 1.29  |
| 0 | -8 | 1  | 5.82   | 1.08  |
| 0 | -8 | 1  | 5.83   | 1.21  |
| 0 | -8 | 1  | 6.03   | 1.10  |
| 0 | -8 | 1  | 5.49   | 1.33  |
| 0 | -8 | 2  | 3.82   | 0.99  |
| 0 | -8 | 2  | 3.66   | 1.09  |
| 0 | -8 | 2  | 4.25   | 1.28  |
| 0 | -8 | 2  | 4.85   | 1.10  |
| 0 | -8 | 2  | 5.17   | 0.92  |
| 0 | -8 | 2  | 5.69   | 1.11  |
| 0 | -8 | 2  | 3.28   | 1.02  |
| 0 | -8 | 2  | 3.59   | 1.23  |
| 0 | -8 | 2  | 4.93   | 1.22  |
| 0 | -8 | 2  | 4.10   | 0.94  |
| 0 | -8 | 3  | 247.81 | 6.22  |
| 0 | -8 | 3  | 245.74 | 6.15  |
| 0 | -8 | 3  | 227.94 | 6.16  |
| 0 | -8 | 3  | 239.51 | 5.87  |
| 0 | -8 | 3  | 215.40 | 4.84  |
| 0 | -8 | 3  | 216.21 | 5.51  |
| 0 | -8 | 3  | 216.42 | 5.07  |
| 0 | -8 | 3  | 170.78 | 5.59  |
| 0 | -8 | 3  | 252.28 | 6.17  |

## CIF 31

|   |    |   |        |       |
|---|----|---|--------|-------|
| 0 | -8 | 3 | 253.20 | 6.44  |
| 0 | -8 | 3 | 211.01 | 5.16  |
| 0 | -8 | 3 | 235.26 | 5.17  |
| 0 | -8 | 3 | 215.65 | 5.88  |
| 0 | -8 | 4 | 653.66 | 10.84 |
| 0 | -8 | 4 | 702.97 | 11.67 |
| 0 | -8 | 4 | 715.82 | 10.84 |
| 0 | -8 | 4 | 744.57 | 11.33 |
| 0 | -8 | 4 | 678.38 | 9.80  |
| 0 | -8 | 4 | 640.93 | 9.93  |
| 0 | -8 | 4 | 680.17 | 11.79 |
| 0 | -8 | 4 | 724.47 | 10.66 |
| 0 | -8 | 4 | 657.94 | 10.99 |
| 0 | -8 | 4 | 701.57 | 11.64 |
| 0 | -8 | 4 | 603.11 | 9.57  |
| 0 | -8 | 4 | 753.70 | 10.77 |
| 0 | -8 | 4 | 689.77 | 11.34 |
| 0 | -8 | 5 | 362.63 | 7.56  |
| 0 | -8 | 5 | 354.93 | 7.40  |
| 0 | -8 | 5 | 340.58 | 7.75  |
| 0 | -8 | 5 | 350.24 | 7.25  |
| 0 | -8 | 5 | 359.12 | 6.80  |
| 0 | -8 | 5 | 347.73 | 6.89  |
| 0 | -8 | 5 | 364.02 | 8.13  |
| 0 | -8 | 5 | 395.63 | 7.33  |
| 0 | -8 | 5 | 375.08 | 7.81  |
| 0 | -8 | 5 | 312.81 | 7.54  |
| 0 | -8 | 5 | 407.97 | 7.93  |
| 0 | -8 | 5 | 384.10 | 8.05  |
| 0 | -8 | 6 | 361.05 | 7.72  |
| 0 | -8 | 6 | 320.44 | 6.92  |
| 0 | -8 | 6 | 367.05 | 8.04  |
| 0 | -8 | 6 | 370.62 | 7.08  |
| 0 | -8 | 6 | 391.29 | 8.39  |
| 0 | -8 | 6 | 370.17 | 7.99  |
| 0 | -8 | 6 | 414.95 | 8.35  |
| 0 | -8 | 7 | 503.92 | 9.18  |
| 0 | -8 | 7 | 458.81 | 8.67  |
| 0 | -8 | 7 | 469.11 | 8.67  |
| 0 | -8 | 7 | 507.88 | 8.27  |
| 0 | -8 | 7 | 448.03 | 9.18  |

## CIF 31

|   |    |     |        |       |
|---|----|-----|--------|-------|
| 0 | -8 | 7   | 501.14 | 9.73  |
| 0 | -8 | 7   | 528.41 | 10.05 |
| 0 | -8 | 7   | 502.78 | 9.71  |
| 0 | -8 | 8   | 47.25  | 2.69  |
| 0 | -8 | 8   | 38.92  | 3.30  |
| 0 | -8 | 8   | 35.78  | 3.41  |
| 0 | -8 | 8   | 43.06  | 2.53  |
| 0 | -8 | 8   | 48.07  | 2.23  |
| 0 | -8 | 8   | 43.78  | 2.62  |
| 0 | -8 | 8   | 47.24  | 2.96  |
| 0 | -8 | 8   | 49.02  | 3.35  |
| 0 | -8 | 8   | 44.97  | 2.75  |
| 0 | -8 | 9   | 190.20 | 5.29  |
| 0 | -8 | 9   | 162.02 | 5.54  |
| 0 | -8 | 9   | 161.20 | 5.69  |
| 0 | -8 | 9   | 175.14 | 5.56  |
| 0 | -8 | 9   | 199.40 | 6.12  |
| 0 | -8 | 9   | 174.97 | 5.31  |
| 0 | -8 | 10  | 310.38 | 7.53  |
| 0 | -8 | 10  | 350.47 | 7.17  |
| 0 | -8 | 10  | 324.04 | 7.69  |
| 0 | -8 | 10  | 313.01 | 7.52  |
| 0 | -8 | 10  | 349.11 | 7.81  |
| 0 | -8 | 10  | 325.20 | 7.81  |
| 0 | -8 | 10  | 346.59 | 7.40  |
| 0 | -8 | 11  | 235.17 | 5.45  |
| 0 | -8 | 11  | 235.69 | 6.03  |
| 0 | -8 | 11  | 230.69 | 6.19  |
| 0 | -8 | 11  | 241.88 | 6.12  |
| 0 | -8 | 11  | 248.44 | 6.20  |
| 0 | -8 | 12  | 50.06  | 2.21  |
| 0 | -8 | 12  | 56.82  | 2.76  |
| 0 | -8 | 12  | 46.90  | 2.52  |
| 0 | -8 | 12  | 52.59  | 2.65  |
| 0 | -8 | 12  | 53.65  | 2.66  |
| 0 | -8 | 13  | 75.83  | 2.80  |
| 0 | -8 | 13  | 77.61  | 2.85  |
| 0 | -8 | 14  | 1.30   | 0.54  |
| 0 | -8 | 14  | 0.92   | 0.53  |
| 0 | -7 | -10 | 25.69  | 1.02  |
| 0 | -7 | -10 | 24.95  | 1.21  |

## CIF 31

|   |    |     |         |       |
|---|----|-----|---------|-------|
| 0 | -7 | -10 | 27.41   | 1.04  |
| 0 | -7 | -10 | 26.86   | 1.35  |
| 0 | -7 | -9  | 397.72  | 6.02  |
| 0 | -7 | -9  | 388.67  | 6.85  |
| 0 | -7 | -9  | 382.21  | 5.79  |
| 0 | -7 | -8  | 42.19   | 2.49  |
| 0 | -7 | -8  | 36.93   | 1.94  |
| 0 | -7 | -8  | 41.50   | 2.12  |
| 0 | -7 | -7  | 57.45   | 3.19  |
| 0 | -7 | -7  | 53.80   | 2.71  |
| 0 | -7 | -7  | 54.05   | 2.48  |
| 0 | -7 | -6  | 107.23  | 3.39  |
| 0 | -7 | -6  | 110.99  | 3.66  |
| 0 | -7 | -6  | 109.07  | 4.47  |
| 0 | -7 | -6  | 102.93  | 3.74  |
| 0 | -7 | -5  | 114.76  | 3.73  |
| 0 | -7 | -5  | 121.00  | 4.13  |
| 0 | -7 | -5  | 118.48  | 3.81  |
| 0 | -7 | -5  | 110.83  | 4.54  |
| 0 | -7 | -5  | 106.84  | 4.12  |
| 0 | -7 | -5  | 119.98  | 4.18  |
| 0 | -7 | -5  | 115.86  | 3.94  |
| 0 | -7 | -4  | 1136.34 | 14.34 |
| 0 | -7 | -4  | 1063.00 | 14.27 |
| 0 | -7 | -4  | 977.85  | 13.23 |
| 0 | -7 | -4  | 1170.31 | 16.39 |
| 0 | -7 | -4  | 1087.68 | 14.91 |
| 0 | -7 | -4  | 1059.66 | 15.21 |
| 0 | -7 | -4  | 1122.27 | 14.64 |
| 0 | -7 | -3  | 80.72   | 2.89  |
| 0 | -7 | -3  | 86.63   | 3.65  |
| 0 | -7 | -3  | 80.30   | 3.10  |
| 0 | -7 | -3  | 90.65   | 3.40  |
| 0 | -7 | -3  | 88.60   | 3.55  |
| 0 | -7 | -3  | 84.77   | 3.43  |
| 0 | -7 | -2  | 2132.19 | 22.57 |
| 0 | -7 | -2  | 2214.43 | 24.03 |
| 0 | -7 | -2  | 2165.51 | 24.74 |
| 0 | -7 | -2  | 2192.31 | 23.74 |
| 0 | -7 | -2  | 2189.63 | 23.41 |
| 0 | -7 | -1  | 78.92   | 3.61  |

## CIF 31

|   |    |    |         |       |
|---|----|----|---------|-------|
| 0 | -7 | -1 | 87.25   | 3.04  |
| 0 | -7 | -1 | 106.58  | 3.36  |
| 0 | -7 | -1 | 90.68   | 3.53  |
| 0 | -7 | -1 | 86.02   | 3.63  |
| 0 | -7 | -1 | 93.65   | 3.44  |
| 0 | -7 | -1 | 95.71   | 3.18  |
| 0 | -7 | 0  | 2113.36 | 24.43 |
| 0 | -7 | 0  | 2076.12 | 24.43 |
| 0 | -7 | 0  | 2202.46 | 24.79 |
| 0 | -7 | 0  | 2102.86 | 24.16 |
| 0 | -7 | 0  | 2273.19 | 23.97 |
| 0 | -7 | 0  | 2195.85 | 22.87 |
| 0 | -7 | 0  | 2309.78 | 24.56 |
| 0 | -7 | 0  | 2162.07 | 23.36 |
| 0 | -7 | 0  | 2141.70 | 22.40 |
| 0 | -7 | 0  | 2132.04 | 22.93 |
| 0 | -7 | 1  | 50.55   | 2.71  |
| 0 | -7 | 1  | 52.11   | 2.80  |
| 0 | -7 | 1  | 55.75   | 2.52  |
| 0 | -7 | 1  | 50.93   | 2.75  |
| 0 | -7 | 1  | 53.04   | 2.15  |
| 0 | -7 | 1  | 51.61   | 2.25  |
| 0 | -7 | 1  | 62.77   | 3.00  |
| 0 | -7 | 1  | 53.71   | 2.60  |
| 0 | -7 | 1  | 56.00   | 2.80  |
| 0 | -7 | 1  | 52.47   | 2.41  |
| 0 | -7 | 1  | 51.67   | 2.44  |
| 0 | -7 | 1  | 54.19   | 2.58  |
| 0 | -7 | 2  | 9.70    | 1.31  |
| 0 | -7 | 2  | 8.50    | 1.29  |
| 0 | -7 | 2  | 8.37    | 1.36  |
| 0 | -7 | 2  | 11.17   | 1.27  |
| 0 | -7 | 2  | 8.77    | 1.36  |
| 0 | -7 | 2  | 10.06   | 1.05  |
| 0 | -7 | 2  | 8.17    | 0.98  |
| 0 | -7 | 2  | 9.57    | 1.27  |
| 0 | -7 | 2  | 12.88   | 1.52  |
| 0 | -7 | 2  | 10.66   | 1.18  |
| 0 | -7 | 2  | 9.08    | 1.15  |
| 0 | -7 | 2  | 10.90   | 1.27  |
| 0 | -7 | 2  | 10.98   | 1.10  |

## CIF 31

|   |    |   |        |       |
|---|----|---|--------|-------|
| 0 | -7 | 2 | 8.80   | 1.23  |
| 0 | -7 | 3 | 929.06 | 12.54 |
| 0 | -7 | 3 | 960.80 | 13.01 |
| 0 | -7 | 3 | 895.24 | 13.05 |
| 0 | -7 | 3 | 934.31 | 12.29 |
| 0 | -7 | 3 | 900.17 | 11.73 |
| 0 | -7 | 3 | 907.59 | 11.50 |
| 0 | -7 | 3 | 897.61 | 12.58 |
| 0 | -7 | 3 | 936.52 | 13.09 |
| 0 | -7 | 3 | 933.27 | 11.82 |
| 0 | -7 | 3 | 920.98 | 12.88 |
| 0 | -7 | 4 | 13.87  | 1.47  |
| 0 | -7 | 4 | 15.67  | 1.39  |
| 0 | -7 | 4 | 16.51  | 1.54  |
| 0 | -7 | 4 | 16.50  | 1.70  |
| 0 | -7 | 4 | 17.46  | 1.66  |
| 0 | -7 | 4 | 12.65  | 1.54  |
| 0 | -7 | 4 | 16.94  | 1.28  |
| 0 | -7 | 4 | 17.98  | 1.49  |
| 0 | -7 | 4 | 17.50  | 1.46  |
| 0 | -7 | 4 | 18.34  | 2.29  |
| 0 | -7 | 5 | 488.87 | 8.38  |
| 0 | -7 | 5 | 447.79 | 7.64  |
| 0 | -7 | 5 | 423.72 | 7.83  |
| 0 | -7 | 5 | 407.22 | 6.95  |
| 0 | -7 | 5 | 477.05 | 7.92  |
| 0 | -7 | 5 | 412.56 | 8.34  |
| 0 | -7 | 5 | 430.31 | 7.44  |
| 0 | -7 | 5 | 419.11 | 6.60  |
| 0 | -7 | 5 | 465.45 | 8.68  |
| 0 | -7 | 5 | 457.62 | 7.86  |
| 0 | -7 | 5 | 452.49 | 7.60  |
| 0 | -7 | 5 | 456.23 | 9.00  |
| 0 | -7 | 6 | 45.48  | 2.53  |
| 0 | -7 | 6 | 46.86  | 2.59  |
| 0 | -7 | 6 | 50.87  | 2.91  |
| 0 | -7 | 6 | 43.64  | 2.40  |
| 0 | -7 | 6 | 42.49  | 2.52  |
| 0 | -7 | 6 | 47.65  | 2.68  |
| 0 | -7 | 6 | 46.66  | 2.27  |
| 0 | -7 | 6 | 47.20  | 2.69  |

## CIF 31

|   |    |    |         |       |
|---|----|----|---------|-------|
| 0 | -7 | 6  | 44.52   | 2.31  |
| 0 | -7 | 6  | 40.42   | 2.11  |
| 0 | -7 | 6  | 45.32   | 3.60  |
| 0 | -7 | 6  | 51.49   | 2.77  |
| 0 | -7 | 7  | 1386.15 | 17.37 |
| 0 | -7 | 7  | 1450.46 | 17.90 |
| 0 | -7 | 7  | 1402.48 | 17.55 |
| 0 | -7 | 7  | 1308.66 | 16.70 |
| 0 | -7 | 7  | 1453.98 | 17.78 |
| 0 | -7 | 7  | 1365.98 | 15.87 |
| 0 | -7 | 7  | 1424.35 | 18.27 |
| 0 | -7 | 7  | 1281.24 | 18.71 |
| 0 | -7 | 7  | 1457.20 | 18.13 |
| 0 | -7 | 8  | 54.88   | 2.89  |
| 0 | -7 | 8  | 53.98   | 2.64  |
| 0 | -7 | 8  | 57.84   | 3.04  |
| 0 | -7 | 8  | 51.16   | 3.67  |
| 0 | -7 | 8  | 48.68   | 3.18  |
| 0 | -7 | 8  | 54.19   | 2.76  |
| 0 | -7 | 8  | 54.52   | 3.10  |
| 0 | -7 | 8  | 53.87   | 4.27  |
| 0 | -7 | 8  | 54.07   | 2.90  |
| 0 | -7 | 9  | 124.57  | 4.40  |
| 0 | -7 | 9  | 129.61  | 4.13  |
| 0 | -7 | 9  | 125.46  | 4.50  |
| 0 | -7 | 9  | 120.17  | 5.28  |
| 0 | -7 | 9  | 110.95  | 4.76  |
| 0 | -7 | 9  | 126.93  | 4.75  |
| 0 | -7 | 9  | 130.55  | 4.48  |
| 0 | -7 | 10 | 568.12  | 9.83  |
| 0 | -7 | 10 | 521.53  | 8.91  |
| 0 | -7 | 10 | 558.89  | 10.05 |
| 0 | -7 | 10 | 504.17  | 10.62 |
| 0 | -7 | 10 | 519.67  | 10.59 |
| 0 | -7 | 10 | 488.71  | 10.04 |
| 0 | -7 | 10 | 530.11  | 10.31 |
| 0 | -7 | 10 | 582.77  | 10.82 |
| 0 | -7 | 10 | 531.45  | 9.43  |
| 0 | -7 | 11 | 36.07   | 2.37  |
| 0 | -7 | 11 | 35.85   | 2.10  |
| 0 | -7 | 11 | 37.42   | 2.46  |

## CIF 31

|   |    |     |        |      |
|---|----|-----|--------|------|
| 0 | -7 | 11  | 34.59  | 3.59 |
| 0 | -7 | 11  | 35.98  | 3.84 |
| 0 | -7 | 11  | 38.58  | 2.65 |
| 0 | -7 | 11  | 35.54  | 2.58 |
| 0 | -7 | 11  | 40.66  | 2.89 |
| 0 | -7 | 12  | 1.95   | 0.93 |
| 0 | -7 | 12  | 1.87   | 0.96 |
| 0 | -7 | 12  | 2.08   | 2.03 |
| 0 | -7 | 12  | 1.92   | 2.32 |
| 0 | -7 | 12  | 4.60   | 1.28 |
| 0 | -7 | 12  | 1.59   | 0.96 |
| 0 | -7 | 12  | 2.99   | 1.20 |
| 0 | -7 | 12  | 2.86   | 0.98 |
| 0 | -7 | 13  | 188.70 | 4.34 |
| 0 | -7 | 13  | 193.77 | 4.54 |
| 0 | -7 | 13  | 183.75 | 4.92 |
| 0 | -7 | 13  | 190.47 | 4.96 |
| 0 | -7 | 14  | 2.72   | 0.80 |
| 0 | -6 | -11 | 63.63  | 2.18 |
| 0 | -6 | -11 | 57.62  | 1.87 |
| 0 | -6 | -10 | 28.32  | 1.53 |
| 0 | -6 | -10 | 32.53  | 2.12 |
| 0 | -6 | -10 | 34.72  | 1.94 |
| 0 | -6 | -10 | 30.54  | 1.61 |
| 0 | -6 | -9  | 9.35   | 1.19 |
| 0 | -6 | -9  | 8.59   | 1.53 |
| 0 | -6 | -9  | 9.45   | 1.24 |
| 0 | -6 | -9  | 9.25   | 1.36 |
| 0 | -6 | -8  | 264.19 | 6.99 |
| 0 | -6 | -8  | 264.61 | 5.90 |
| 0 | -6 | -8  | 273.52 | 5.82 |
| 0 | -6 | -7  | 2.70   | 1.16 |
| 0 | -6 | -7  | 2.45   | 1.00 |
| 0 | -6 | -7  | 0.72   | 0.60 |
| 0 | -6 | -7  | 1.61   | 0.74 |
| 0 | -6 | -7  | 0.84   | 0.73 |
| 0 | -6 | -7  | 1.18   | 0.86 |
| 0 | -6 | -6  | 278.85 | 5.81 |
| 0 | -6 | -6  | 278.63 | 6.41 |
| 0 | -6 | -6  | 266.56 | 6.02 |
| 0 | -6 | -6  | 282.48 | 7.47 |



## CIF 31

|   |    |    |        |      |
|---|----|----|--------|------|
| 0 | -6 | -6 | 261.01 | 6.16 |
| 0 | -6 | -6 | 285.15 | 6.33 |
| 0 | -6 | -6 | 263.67 | 6.01 |
| 0 | -6 | -5 | 307.95 | 6.31 |
| 0 | -6 | -5 | 331.40 | 6.51 |
| 0 | -6 | -5 | 291.88 | 7.39 |
| 0 | -6 | -5 | 283.49 | 6.50 |
| 0 | -6 | -5 | 297.54 | 7.11 |
| 0 | -6 | -5 | 341.94 | 6.87 |
| 0 | -6 | -5 | 291.14 | 6.55 |
| 0 | -6 | -5 | 328.78 | 6.91 |
| 0 | -6 | -5 | 319.78 | 6.63 |
| 0 | -6 | -4 | 135.48 | 3.87 |
| 0 | -6 | -4 | 139.82 | 4.78 |
| 0 | -6 | -4 | 132.57 | 4.07 |
| 0 | -6 | -4 | 141.62 | 4.55 |
| 0 | -6 | -4 | 133.12 | 4.11 |
| 0 | -6 | -4 | 133.82 | 4.14 |
| 0 | -6 | -4 | 133.51 | 4.07 |
| 0 | -6 | -3 | 40.99  | 2.02 |
| 0 | -6 | -3 | 49.68  | 2.60 |
| 0 | -6 | -3 | 49.93  | 2.35 |
| 0 | -6 | -3 | 48.16  | 2.34 |
| 0 | -6 | -3 | 44.31  | 2.64 |
| 0 | -6 | -3 | 44.91  | 2.44 |
| 0 | -6 | -3 | 41.98  | 2.20 |
| 0 | -6 | -3 | 47.77  | 2.34 |
| 0 | -6 | -2 | 49.85  | 2.76 |
| 0 | -6 | -2 | 43.54  | 1.90 |
| 0 | -6 | -2 | 51.89  | 2.28 |
| 0 | -6 | -2 | 47.89  | 2.17 |
| 0 | -6 | -2 | 53.35  | 2.52 |
| 0 | -6 | -2 | 41.15  | 1.94 |
| 0 | -6 | -2 | 48.35  | 2.60 |
| 0 | -6 | -2 | 51.08  | 2.44 |
| 0 | -6 | -2 | 46.42  | 2.24 |
| 0 | -6 | -2 | 47.22  | 1.96 |
| 0 | -6 | -1 | 63.31  | 2.95 |
| 0 | -6 | -1 | 53.78  | 2.77 |
| 0 | -6 | -1 | 63.32  | 2.95 |
| 0 | -6 | -1 | 64.15  | 2.39 |

## CIF 31

|   |    |    |         |       |
|---|----|----|---------|-------|
| 0 | -6 | -1 | 61.74   | 2.71  |
| 0 | -6 | -1 | 63.36   | 2.81  |
| 0 | -6 | -1 | 61.45   | 2.35  |
| 0 | -6 | -1 | 57.33   | 2.44  |
| 0 | -6 | -1 | 63.50   | 2.39  |
| 0 | -6 | 0  | 2603.62 | 26.66 |
| 0 | -6 | 0  | 2649.88 | 26.83 |
| 0 | -6 | 0  | 2603.09 | 26.68 |
| 0 | -6 | 0  | 2518.23 | 25.10 |
| 0 | -6 | 0  | 2559.82 | 24.78 |
| 0 | -6 | 0  | 2494.03 | 26.33 |
| 0 | -6 | 0  | 2647.68 | 25.90 |
| 0 | -6 | 0  | 2384.94 | 25.88 |
| 0 | -6 | 0  | 2710.78 | 25.58 |
| 0 | -6 | 0  | 2439.97 | 24.87 |
| 0 | -6 | 0  | 2440.73 | 25.23 |
| 0 | -6 | 1  | 28.25   | 1.88  |
| 0 | -6 | 1  | 27.50   | 1.85  |
| 0 | -6 | 1  | 25.16   | 1.81  |
| 0 | -6 | 1  | 31.67   | 1.73  |
| 0 | -6 | 1  | 34.91   | 1.85  |
| 0 | -6 | 1  | 34.50   | 1.62  |
| 0 | -6 | 1  | 29.05   | 1.54  |
| 0 | -6 | 1  | 38.87   | 2.20  |
| 0 | -6 | 1  | 31.45   | 1.86  |
| 0 | -6 | 1  | 38.07   | 2.07  |
| 0 | -6 | 1  | 30.27   | 1.73  |
| 0 | -6 | 1  | 39.50   | 1.87  |
| 0 | -6 | 1  | 35.88   | 1.83  |
| 0 | -6 | 1  | 38.75   | 1.60  |
| 0 | -6 | 1  | 40.22   | 2.01  |
| 0 | -6 | 2  | 497.51  | 8.02  |
| 0 | -6 | 2  | 477.49  | 7.89  |
| 0 | -6 | 2  | 492.80  | 8.10  |
| 0 | -6 | 2  | 455.87  | 7.21  |
| 0 | -6 | 2  | 474.53  | 7.48  |
| 0 | -6 | 2  | 478.36  | 7.06  |
| 0 | -6 | 2  | 461.87  | 7.56  |
| 0 | -6 | 2  | 462.40  | 6.86  |
| 0 | -6 | 2  | 486.59  | 8.15  |
| 0 | -6 | 2  | 473.35  | 7.79  |

## CIF 31

|   |    |   |         |       |
|---|----|---|---------|-------|
| 0 | -6 | 2 | 490.73  | 7.22  |
| 0 | -6 | 2 | 484.51  | 7.13  |
| 0 | -6 | 2 | 504.05  | 7.80  |
| 0 | -6 | 3 | 583.76  | 8.75  |
| 0 | -6 | 3 | 536.04  | 7.21  |
| 0 | -6 | 3 | 548.52  | 8.51  |
| 0 | -6 | 3 | 549.59  | 6.89  |
| 0 | -6 | 3 | 516.89  | 7.72  |
| 0 | -6 | 3 | 558.61  | 8.28  |
| 0 | -6 | 3 | 519.11  | 8.41  |
| 0 | -6 | 3 | 544.00  | 7.61  |
| 0 | -6 | 3 | 544.24  | 7.93  |
| 0 | -6 | 3 | 524.52  | 8.07  |
| 0 | -6 | 3 | 595.56  | 8.35  |
| 0 | -6 | 3 | 519.95  | 8.46  |
| 0 | -6 | 4 | 85.82   | 3.22  |
| 0 | -6 | 4 | 113.74  | 3.41  |
| 0 | -6 | 4 | 101.32  | 2.96  |
| 0 | -6 | 4 | 103.11  | 3.27  |
| 0 | -6 | 4 | 106.73  | 2.73  |
| 0 | -6 | 4 | 89.39   | 3.31  |
| 0 | -6 | 4 | 91.96   | 2.60  |
| 0 | -6 | 4 | 78.21   | 3.06  |
| 0 | -6 | 4 | 87.16   | 2.82  |
| 0 | -6 | 4 | 97.60   | 3.06  |
| 0 | -6 | 4 | 96.67   | 2.99  |
| 0 | -6 | 4 | 76.70   | 3.54  |
| 0 | -6 | 5 | 1981.05 | 21.79 |
| 0 | -6 | 5 | 2069.20 | 21.48 |
| 0 | -6 | 5 | 2183.69 | 22.47 |
| 0 | -6 | 5 | 2040.73 | 21.70 |
| 0 | -6 | 5 | 2408.23 | 21.39 |
| 0 | -6 | 5 | 2007.45 | 22.36 |
| 0 | -6 | 5 | 2029.77 | 19.81 |
| 0 | -6 | 5 | 1944.44 | 22.11 |
| 0 | -6 | 5 | 2065.65 | 21.07 |
| 0 | -6 | 5 | 2076.66 | 21.50 |
| 0 | -6 | 5 | 2142.94 | 21.35 |
| 0 | -6 | 5 | 1785.46 | 23.15 |
| 0 | -6 | 6 | 6.75    | 1.18  |
| 0 | -6 | 6 | 7.22    | 1.02  |

## CIF 31

|   |    |    |         |       |
|---|----|----|---------|-------|
| 0 | -6 | 6  | 7.19    | 1.11  |
| 0 | -6 | 6  | 7.48    | 1.14  |
| 0 | -6 | 6  | 8.34    | 1.11  |
| 0 | -6 | 6  | 9.05    | 1.10  |
| 0 | -6 | 6  | 6.47    | 1.05  |
| 0 | -6 | 6  | 5.73    | 0.85  |
| 0 | -6 | 6  | 6.55    | 0.99  |
| 0 | -6 | 6  | 6.19    | 0.89  |
| 0 | -6 | 7  | 8.70    | 1.30  |
| 0 | -6 | 7  | 9.46    | 1.28  |
| 0 | -6 | 7  | 8.35    | 1.30  |
| 0 | -6 | 7  | 10.20   | 1.32  |
| 0 | -6 | 7  | 7.79    | 1.14  |
| 0 | -6 | 7  | 8.30    | 1.15  |
| 0 | -6 | 7  | 8.18    | 1.09  |
| 0 | -6 | 7  | 9.50    | 0.96  |
| 0 | -6 | 7  | 7.76    | 1.01  |
| 0 | -6 | 7  | 7.66    | 2.27  |
| 0 | -6 | 8  | 1074.85 | 14.33 |
| 0 | -6 | 8  | 1032.90 | 13.68 |
| 0 | -6 | 8  | 1020.86 | 14.12 |
| 0 | -6 | 8  | 1011.68 | 14.32 |
| 0 | -6 | 8  | 1152.64 | 15.26 |
| 0 | -6 | 8  | 1082.75 | 14.18 |
| 0 | -6 | 8  | 962.57  | 13.23 |
| 0 | -6 | 8  | 1096.20 | 13.64 |
| 0 | -6 | 8  | 1061.12 | 12.95 |
| 0 | -6 | 8  | 963.86  | 12.81 |
| 0 | -6 | 9  | 850.19  | 12.45 |
| 0 | -6 | 9  | 940.44  | 13.32 |
| 0 | -6 | 9  | 871.94  | 13.18 |
| 0 | -6 | 9  | 907.87  | 14.09 |
| 0 | -6 | 9  | 804.08  | 13.19 |
| 0 | -6 | 9  | 897.64  | 12.03 |
| 0 | -6 | 9  | 944.23  | 13.73 |
| 0 | -6 | 9  | 837.98  | 15.09 |
| 0 | -6 | 9  | 885.72  | 12.73 |
| 0 | -6 | 10 | 432.33  | 8.59  |
| 0 | -6 | 10 | 439.24  | 8.80  |
| 0 | -6 | 10 | 416.24  | 9.25  |
| 0 | -6 | 10 | 398.01  | 8.74  |

## CIF 31

|   |    |     |        |       |
|---|----|-----|--------|-------|
| 0 | -6 | 10  | 421.02 | 8.02  |
| 0 | -6 | 10  | 411.18 | 8.92  |
| 0 | -6 | 10  | 411.97 | 7.73  |
| 0 | -6 | 10  | 408.59 | 9.64  |
| 0 | -6 | 10  | 405.92 | 7.77  |
| 0 | -6 | 11  | 605.63 | 10.45 |
| 0 | -6 | 11  | 642.24 | 10.19 |
| 0 | -6 | 11  | 639.16 | 10.91 |
| 0 | -6 | 11  | 594.35 | 11.46 |
| 0 | -6 | 11  | 588.84 | 11.57 |
| 0 | -6 | 11  | 599.75 | 11.13 |
| 0 | -6 | 11  | 627.54 | 11.19 |
| 0 | -6 | 12  | 261.66 | 6.27  |
| 0 | -6 | 12  | 266.81 | 5.82  |
| 0 | -6 | 12  | 259.73 | 6.30  |
| 0 | -6 | 12  | 242.88 | 7.11  |
| 0 | -6 | 12  | 245.89 | 6.53  |
| 0 | -6 | 13  | 272.96 | 5.27  |
| 0 | -6 | 13  | 252.67 | 5.63  |
| 0 | -6 | 13  | 248.57 | 5.72  |
| 0 | -6 | 13  | 261.02 | 5.70  |
| 0 | -6 | 13  | 260.58 | 6.22  |
| 0 | -6 | 14  | 55.17  | 2.11  |
| 0 | -6 | 14  | 57.03  | 2.18  |
| 0 | -6 | 14  | 53.03  | 2.42  |
| 0 | -6 | 14  | 51.76  | 2.42  |
| 0 | -6 | 15  | 17.73  | 1.13  |
| 0 | -5 | -12 | 203.69 | 3.90  |
| 0 | -5 | -12 | 218.06 | 3.32  |
| 0 | -5 | -11 | 48.89  | 1.77  |
| 0 | -5 | -11 | 51.61  | 2.07  |
| 0 | -5 | -10 | 6.50   | 1.06  |
| 0 | -5 | -10 | 6.89   | 1.51  |
| 0 | -5 | -10 | 6.44   | 1.18  |
| 0 | -5 | -10 | 7.06   | 0.87  |
| 0 | -5 | -10 | 6.44   | 0.97  |
| 0 | -5 | -9  | 112.50 | 4.70  |
| 0 | -5 | -9  | 110.47 | 3.70  |
| 0 | -5 | -9  | 102.91 | 3.20  |
| 0 | -5 | -9  | 105.41 | 3.60  |
| 0 | -5 | -8  | 1.07   | 1.01  |

## CIF 31

|   |    |    |         |       |
|---|----|----|---------|-------|
| 0 | -5 | -8 | 1.82    | 1.11  |
| 0 | -5 | -8 | 0.57    | 0.75  |
| 0 | -5 | -8 | 3.55    | 0.82  |
| 0 | -5 | -8 | 1.22    | 0.89  |
| 0 | -5 | -7 | 1372.31 | 16.73 |
| 0 | -5 | -7 | 1283.46 | 16.38 |
| 0 | -5 | -7 | 1277.73 | 15.27 |
| 0 | -5 | -7 | 1269.19 | 15.86 |
| 0 | -5 | -7 | 1391.33 | 16.95 |
| 0 | -5 | -7 | 1259.09 | 15.63 |
| 0 | -5 | -6 | 3450.14 | 32.79 |
| 0 | -5 | -6 | 3353.62 | 33.82 |
| 0 | -5 | -6 | 3306.13 | 33.45 |
| 0 | -5 | -6 | 3376.88 | 35.96 |
| 0 | -5 | -6 | 3305.49 | 32.38 |
| 0 | -5 | -6 | 3406.21 | 33.40 |
| 0 | -5 | -6 | 3404.88 | 33.33 |
| 0 | -5 | -5 | 340.76  | 6.28  |
| 0 | -5 | -5 | 316.79  | 6.32  |
| 0 | -5 | -5 | 311.80  | 6.66  |
| 0 | -5 | -5 | 316.96  | 7.01  |
| 0 | -5 | -5 | 318.08  | 6.72  |
| 0 | -5 | -5 | 349.01  | 5.94  |
| 0 | -5 | -5 | 327.37  | 6.53  |
| 0 | -5 | -5 | 328.67  | 6.55  |
| 0 | -5 | -5 | 350.21  | 6.53  |
| 0 | -5 | -5 | 331.44  | 7.41  |
| 0 | -5 | -4 | 809.88  | 10.71 |
| 0 | -5 | -4 | 892.62  | 11.65 |
| 0 | -5 | -4 | 808.22  | 11.74 |
| 0 | -5 | -4 | 794.77  | 11.19 |
| 0 | -5 | -4 | 916.66  | 12.70 |
| 0 | -5 | -4 | 809.27  | 11.15 |
| 0 | -5 | -4 | 779.90  | 11.04 |
| 0 | -5 | -4 | 798.84  | 10.86 |
| 0 | -5 | -3 | 713.13  | 9.47  |
| 0 | -5 | -3 | 759.96  | 10.23 |
| 0 | -5 | -3 | 788.88  | 10.87 |
| 0 | -5 | -3 | 766.99  | 10.14 |
| 0 | -5 | -3 | 714.40  | 10.40 |
| 0 | -5 | -3 | 746.56  | 10.97 |

## CIF 31

|   |    |    |         |       |
|---|----|----|---------|-------|
| 0 | -5 | -3 | 784.38  | 10.31 |
| 0 | -5 | -3 | 739.05  | 10.08 |
| 0 | -5 | -3 | 742.40  | 10.02 |
| 0 | -5 | -2 | 579.67  | 9.27  |
| 0 | -5 | -2 | 592.25  | 8.09  |
| 0 | -5 | -2 | 552.14  | 7.90  |
| 0 | -5 | -2 | 506.88  | 8.12  |
| 0 | -5 | -2 | 603.43  | 8.67  |
| 0 | -5 | -2 | 592.70  | 8.87  |
| 0 | -5 | -2 | 613.28  | 8.40  |
| 0 | -5 | -2 | 591.75  | 8.94  |
| 0 | -5 | -2 | 571.58  | 8.13  |
| 0 | -5 | -2 | 548.44  | 7.39  |
| 0 | -5 | -1 | 1002.55 | 11.41 |
| 0 | -5 | -1 | 934.80  | 11.21 |
| 0 | -5 | -1 | 946.51  | 11.12 |
| 0 | -5 | -1 | 851.90  | 9.38  |
| 0 | -5 | -1 | 837.99  | 9.64  |
| 0 | -5 | -1 | 906.41  | 10.42 |
| 0 | -5 | -1 | 1015.87 | 10.64 |
| 0 | -5 | -1 | 886.13  | 10.43 |
| 0 | -5 | -1 | 931.40  | 9.65  |
| 0 | -5 | 0  | 176.23  | 3.25  |
| 0 | -5 | 0  | 172.33  | 3.37  |
| 0 | -5 | 0  | 179.98  | 3.71  |
| 0 | -5 | 0  | 172.72  | 4.00  |
| 0 | -5 | 0  | 182.56  | 3.96  |
| 0 | -5 | 0  | 186.76  | 3.71  |
| 0 | -5 | 0  | 182.50  | 2.95  |
| 0 | -5 | 1  | 505.68  | 7.78  |
| 0 | -5 | 1  | 479.14  | 6.72  |
| 0 | -5 | 1  | 496.18  | 7.27  |
| 0 | -5 | 1  | 490.62  | 6.60  |
| 0 | -5 | 1  | 553.33  | 7.71  |
| 0 | -5 | 1  | 499.92  | 6.94  |
| 0 | -5 | 1  | 571.91  | 7.28  |
| 0 | -5 | 1  | 526.07  | 7.36  |
| 0 | -5 | 2  | 568.60  | 8.11  |
| 0 | -5 | 2  | 629.13  | 6.63  |
| 0 | -5 | 2  | 635.28  | 7.80  |
| 0 | -5 | 2  | 562.05  | 8.07  |

## CIF 31

|   |    |   |        |      |
|---|----|---|--------|------|
| 0 | -5 | 2 | 602.45 | 7.55 |
| 0 | -5 | 2 | 585.54 | 7.86 |
| 0 | -5 | 3 | 456.60 | 7.07 |
| 0 | -5 | 3 | 436.96 | 6.83 |
| 0 | -5 | 3 | 438.29 | 6.70 |
| 0 | -5 | 3 | 440.65 | 7.07 |
| 0 | -5 | 3 | 456.85 | 6.13 |
| 0 | -5 | 3 | 479.45 | 6.66 |
| 0 | -5 | 3 | 401.66 | 7.04 |
| 0 | -5 | 4 | 549.44 | 8.00 |
| 0 | -5 | 4 | 535.56 | 7.72 |
| 0 | -5 | 4 | 552.71 | 8.12 |
| 0 | -5 | 4 | 572.62 | 6.84 |
| 0 | -5 | 4 | 518.71 | 7.98 |
| 0 | -5 | 4 | 545.67 | 7.49 |
| 0 | -5 | 4 | 513.19 | 8.51 |
| 0 | -5 | 5 | 452.01 | 7.40 |
| 0 | -5 | 5 | 479.60 | 6.84 |
| 0 | -5 | 5 | 431.73 | 7.03 |
| 0 | -5 | 5 | 469.43 | 7.35 |
| 0 | -5 | 5 | 451.42 | 6.89 |
| 0 | -5 | 5 | 434.74 | 7.27 |
| 0 | -5 | 5 | 422.13 | 5.53 |
| 0 | -5 | 5 | 480.17 | 6.87 |
| 0 | -5 | 5 | 435.87 | 8.08 |
| 0 | -5 | 6 | 164.68 | 4.28 |
| 0 | -5 | 6 | 158.06 | 3.74 |
| 0 | -5 | 6 | 166.27 | 3.80 |
| 0 | -5 | 6 | 155.30 | 3.90 |
| 0 | -5 | 6 | 165.11 | 4.31 |
| 0 | -5 | 6 | 163.39 | 4.07 |
| 0 | -5 | 6 | 153.38 | 3.82 |
| 0 | -5 | 6 | 169.90 | 3.90 |
| 0 | -5 | 6 | 145.75 | 4.69 |
| 0 | -5 | 7 | 409.24 | 7.29 |
| 0 | -5 | 7 | 387.31 | 6.47 |
| 0 | -5 | 7 | 368.39 | 6.76 |
| 0 | -5 | 7 | 369.31 | 7.08 |
| 0 | -5 | 7 | 404.28 | 6.95 |
| 0 | -5 | 7 | 390.77 | 6.75 |
| 0 | -5 | 7 | 383.48 | 6.73 |



## CIF 31

|   |    |    |        |      |
|---|----|----|--------|------|
| 0 | -5 | 7  | 388.85 | 6.62 |
| 0 | -5 | 8  | 377.71 | 6.95 |
| 0 | -5 | 8  | 346.33 | 7.15 |
| 0 | -5 | 8  | 362.70 | 6.84 |
| 0 | -5 | 8  | 334.40 | 6.14 |
| 0 | -5 | 8  | 338.26 | 6.54 |
| 0 | -5 | 8  | 356.69 | 6.48 |
| 0 | -5 | 8  | 355.83 | 6.55 |
| 0 | -5 | 8  | 322.71 | 8.08 |
| 0 | -5 | 9  | 10.78  | 1.49 |
| 0 | -5 | 9  | 6.15   | 1.13 |
| 0 | -5 | 9  | 11.63  | 1.71 |
| 0 | -5 | 9  | 8.06   | 1.32 |
| 0 | -5 | 9  | 7.54   | 1.50 |
| 0 | -5 | 9  | 8.53   | 1.22 |
| 0 | -5 | 9  | 8.23   | 1.10 |
| 0 | -5 | 9  | 8.35   | 1.12 |
| 0 | -5 | 9  | 6.44   | 1.74 |
| 0 | -5 | 9  | 7.21   | 1.03 |
| 0 | -5 | 10 | 0.05   | 0.99 |
| 0 | -5 | 10 | 0.80   | 0.78 |
| 0 | -5 | 10 | 3.75   | 1.29 |
| 0 | -5 | 10 | 0.54   | 1.17 |
| 0 | -5 | 10 | 0.80   | 0.81 |
| 0 | -5 | 10 | 1.09   | 0.74 |
| 0 | -5 | 10 | 1.10   | 0.76 |
| 0 | -5 | 10 | -0.27  | 1.21 |
| 0 | -5 | 11 | 4.11   | 1.15 |
| 0 | -5 | 11 | 4.52   | 1.05 |
| 0 | -5 | 11 | 4.04   | 1.35 |
| 0 | -5 | 11 | 3.90   | 1.01 |
| 0 | -5 | 11 | 4.15   | 1.64 |
| 0 | -5 | 12 | 29.91  | 2.13 |
| 0 | -5 | 12 | 30.99  | 2.31 |
| 0 | -5 | 12 | 34.97  | 3.08 |
| 0 | -5 | 12 | 29.47  | 2.38 |
| 0 | -5 | 12 | 38.72  | 2.50 |
| 0 | -5 | 13 | 101.23 | 4.45 |
| 0 | -5 | 13 | 107.83 | 3.78 |
| 0 | -5 | 13 | 109.51 | 3.56 |
| 0 | -5 | 13 | 110.76 | 3.90 |

## CIF 31

|   |    |     |        |       |
|---|----|-----|--------|-------|
| 0 | -5 | 13  | 104.84 | 3.80  |
| 0 | -5 | 13  | 110.34 | 4.19  |
| 0 | -5 | 13  | 103.33 | 4.05  |
| 0 | -5 | 14  | 410.94 | 6.33  |
| 0 | -5 | 14  | 417.11 | 7.03  |
| 0 | -5 | 14  | 406.53 | 7.48  |
| 0 | -5 | 15  | 306.69 | 5.22  |
| 0 | -4 | -12 | 44.50  | 2.28  |
| 0 | -4 | -12 | 46.86  | 2.15  |
| 0 | -4 | -12 | 44.41  | 1.82  |
| 0 | -4 | -12 | 41.74  | 1.50  |
| 0 | -4 | -12 | 41.12  | 1.57  |
| 0 | -4 | -11 | 109.47 | 4.17  |
| 0 | -4 | -11 | 107.31 | 3.81  |
| 0 | -4 | -11 | 113.20 | 3.48  |
| 0 | -4 | -11 | 112.46 | 3.15  |
| 0 | -4 | -11 | 111.44 | 3.33  |
| 0 | -4 | -11 | 105.69 | 2.98  |
| 0 | -4 | -10 | 27.43  | 1.86  |
| 0 | -4 | -10 | 26.38  | 1.99  |
| 0 | -4 | -10 | 28.83  | 1.82  |
| 0 | -4 | -10 | 22.90  | 2.10  |
| 0 | -4 | -10 | 28.71  | 1.94  |
| 0 | -4 | -9  | 722.60 | 11.01 |
| 0 | -4 | -9  | 726.24 | 11.21 |
| 0 | -4 | -9  | 747.32 | 11.34 |
| 0 | -4 | -8  | 773.49 | 11.47 |
| 0 | -4 | -8  | 775.67 | 11.20 |
| 0 | -4 | -7  | 94.30  | 5.11  |
| 0 | -4 | -7  | 101.31 | 3.63  |
| 0 | -4 | -7  | 106.23 | 4.20  |
| 0 | -4 | -7  | 90.59  | 3.08  |
| 0 | -4 | -7  | 74.04  | 3.67  |
| 0 | -4 | -7  | 85.66  | 3.08  |
| 0 | -4 | -7  | 92.17  | 3.11  |
| 0 | -4 | -7  | 86.09  | 3.38  |
| 0 | -4 | -6  | 96.85  | 3.03  |
| 0 | -4 | -6  | 111.62 | 4.72  |
| 0 | -4 | -6  | 104.57 | 3.41  |
| 0 | -4 | -6  | 114.71 | 4.25  |
| 0 | -4 | -6  | 106.33 | 3.82  |

## CIF 31

|   |    |    |         |       |
|---|----|----|---------|-------|
| 0 | -4 | -6 | 110.22  | 3.91  |
| 0 | -4 | -6 | 108.46  | 3.26  |
| 0 | -4 | -6 | 107.89  | 3.33  |
| 0 | -4 | -6 | 104.93  | 3.23  |
| 0 | -4 | -6 | 106.83  | 3.61  |
| 0 | -4 | -6 | 103.03  | 3.82  |
| 0 | -4 | -6 | 105.06  | 3.57  |
| 0 | -4 | -5 | 13.36   | 1.45  |
| 0 | -4 | -5 | 12.23   | 1.11  |
| 0 | -4 | -5 | 10.86   | 2.27  |
| 0 | -4 | -5 | 11.06   | 1.03  |
| 0 | -4 | -5 | 11.15   | 1.24  |
| 0 | -4 | -5 | 11.22   | 1.21  |
| 0 | -4 | -5 | 11.75   | 1.60  |
| 0 | -4 | -5 | 11.83   | 1.31  |
| 0 | -4 | -5 | 11.47   | 1.11  |
| 0 | -4 | -5 | 10.54   | 1.07  |
| 0 | -4 | -5 | 11.40   | 1.18  |
| 0 | -4 | -4 | 289.45  | 5.26  |
| 0 | -4 | -4 | 325.84  | 6.46  |
| 0 | -4 | -4 | 300.85  | 5.76  |
| 0 | -4 | -4 | 318.90  | 6.13  |
| 0 | -4 | -4 | 307.62  | 5.71  |
| 0 | -4 | -4 | 322.35  | 5.86  |
| 0 | -4 | -4 | 316.99  | 5.49  |
| 0 | -4 | -4 | 317.26  | 5.69  |
| 0 | -4 | -4 | 291.74  | 5.25  |
| 0 | -4 | -3 | 2050.01 | 19.92 |
| 0 | -4 | -3 | 2100.33 | 19.32 |
| 0 | -4 | -3 | 1944.42 | 18.15 |
| 0 | -4 | -3 | 1879.11 | 19.36 |
| 0 | -4 | -3 | 2057.48 | 20.10 |
| 0 | -4 | -3 | 2045.82 | 18.99 |
| 0 | -4 | -2 | 3090.60 | 26.86 |
| 0 | -4 | -2 | 3180.94 | 27.34 |
| 0 | -4 | -2 | 2873.02 | 26.80 |
| 0 | -4 | -2 | 2775.43 | 27.29 |
| 0 | -4 | -2 | 2992.79 | 28.00 |
| 0 | -4 | -2 | 2898.86 | 27.25 |
| 0 | -4 | -2 | 2912.28 | 28.01 |
| 0 | -4 | -2 | 2862.34 | 26.29 |

## CIF 31

|   |    |    |         |       |
|---|----|----|---------|-------|
| 0 | -4 | -1 | 5644.46 | 50.53 |
| 0 | -4 | -1 | 5764.24 | 51.18 |
| 0 | -4 | -1 | 6309.60 | 51.58 |
| 0 | -4 | -1 | 6133.46 | 52.02 |
| 0 | -4 | -1 | 6130.47 | 52.30 |
| 0 | -4 | -1 | 6216.38 | 51.19 |
| 0 | -4 | 0  | 87.16   | 1.80  |
| 0 | -4 | 0  | 95.24   | 2.43  |
| 0 | -4 | 0  | 102.97  | 2.33  |
| 0 | -4 | 0  | 101.30  | 2.68  |
| 0 | -4 | 0  | 94.70   | 2.58  |
| 0 | -4 | 0  | 86.71   | 2.27  |
| 0 | -4 | 0  | 92.75   | 1.43  |
| 0 | -4 | 0  | 103.17  | 2.10  |
| 0 | -4 | 0  | 97.05   | 2.39  |
| 0 | -4 | 1  | 3243.68 | 27.57 |
| 0 | -4 | 1  | 3356.87 | 28.05 |
| 0 | -4 | 1  | 2981.59 | 26.79 |
| 0 | -4 | 1  | 2894.57 | 25.31 |
| 0 | -4 | 1  | 3246.43 | 27.41 |
| 0 | -4 | 1  | 3115.01 | 27.58 |
| 0 | -4 | 1  | 2785.35 | 26.61 |
| 0 | -4 | 1  | 3259.86 | 27.53 |
| 0 | -4 | 1  | 2611.49 | 27.12 |
| 0 | -4 | 2  | 1839.23 | 18.11 |
| 0 | -4 | 2  | 1971.61 | 18.19 |
| 0 | -4 | 2  | 1754.30 | 17.95 |
| 0 | -4 | 2  | 1890.45 | 17.27 |
| 0 | -4 | 2  | 1950.18 | 17.81 |
| 0 | -4 | 2  | 1652.47 | 18.05 |
| 0 | -4 | 3  | 63.05   | 2.07  |
| 0 | -4 | 3  | 65.18   | 1.99  |
| 0 | -4 | 3  | 63.63   | 1.69  |
| 0 | -4 | 3  | 64.75   | 1.91  |
| 0 | -4 | 3  | 58.51   | 2.05  |
| 0 | -4 | 4  | 4.77    | 0.83  |
| 0 | -4 | 4  | 4.33    | 0.62  |
| 0 | -4 | 4  | 4.11    | 0.73  |
| 0 | -4 | 4  | 5.15    | 0.71  |
| 0 | -4 | 4  | 4.28    | 0.63  |
| 0 | -4 | 4  | 4.32    | 0.78  |

## CIF 31

|   |    |    |        |      |
|---|----|----|--------|------|
| 0 | -4 | 4  | 4.13   | 0.47 |
| 0 | -4 | 4  | 5.00   | 0.53 |
| 0 | -4 | 4  | 3.97   | 0.67 |
| 0 | -4 | 4  | 4.19   | 0.85 |
| 0 | -4 | 5  | 174.34 | 3.92 |
| 0 | -4 | 5  | 164.73 | 3.81 |
| 0 | -4 | 5  | 183.72 | 3.77 |
| 0 | -4 | 5  | 163.65 | 3.37 |
| 0 | -4 | 5  | 183.15 | 3.78 |
| 0 | -4 | 5  | 179.37 | 3.58 |
| 0 | -4 | 5  | 164.37 | 2.88 |
| 0 | -4 | 5  | 182.01 | 3.64 |
| 0 | -4 | 5  | 150.25 | 3.88 |
| 0 | -4 | 6  | 401.64 | 6.44 |
| 0 | -4 | 6  | 427.29 | 6.30 |
| 0 | -4 | 6  | 419.32 | 5.88 |
| 0 | -4 | 6  | 397.62 | 6.17 |
| 0 | -4 | 6  | 422.28 | 6.46 |
| 0 | -4 | 7  | 55.25  | 2.28 |
| 0 | -4 | 7  | 58.71  | 2.40 |
| 0 | -4 | 7  | 63.72  | 2.33 |
| 0 | -4 | 7  | 60.51  | 2.13 |
| 0 | -4 | 7  | 65.37  | 2.47 |
| 0 | -4 | 7  | 61.92  | 2.99 |
| 0 | -4 | 8  | 8.62   | 1.03 |
| 0 | -4 | 8  | 9.39   | 1.18 |
| 0 | -4 | 8  | 8.31   | 1.03 |
| 0 | -4 | 8  | 8.26   | 1.04 |
| 0 | -4 | 8  | 8.67   | 1.11 |
| 0 | -4 | 8  | 6.70   | 1.35 |
| 0 | -4 | 9  | 11.46  | 1.12 |
| 0 | -4 | 9  | 10.72  | 1.22 |
| 0 | -4 | 9  | 14.29  | 1.50 |
| 0 | -4 | 9  | 14.79  | 1.40 |
| 0 | -4 | 9  | 13.81  | 1.42 |
| 0 | -4 | 9  | 11.80  | 1.76 |
| 0 | -4 | 10 | 191.77 | 5.21 |
| 0 | -4 | 10 | 182.47 | 5.69 |
| 0 | -4 | 10 | 198.89 | 5.27 |
| 0 | -4 | 10 | 177.94 | 4.96 |
| 0 | -4 | 11 | 17.67  | 1.74 |

## CIF 31

|   |    |     |        |       |
|---|----|-----|--------|-------|
| 0 | -4 | 11  | 16.52  | 2.07  |
| 0 | -4 | 11  | 15.74  | 2.11  |
| 0 | -4 | 11  | 16.43  | 1.63  |
| 0 | -4 | 11  | 16.72  | 1.61  |
| 0 | -4 | 11  | 17.10  | 1.94  |
| 0 | -4 | 12  | 19.52  | 1.73  |
| 0 | -4 | 12  | 20.76  | 2.37  |
| 0 | -4 | 12  | 18.78  | 2.63  |
| 0 | -4 | 12  | 19.97  | 1.72  |
| 0 | -4 | 13  | 203.29 | 5.54  |
| 0 | -4 | 13  | 209.99 | 6.11  |
| 0 | -4 | 13  | 190.04 | 5.56  |
| 0 | -4 | 14  | 74.69  | 2.70  |
| 0 | -4 | 14  | 74.48  | 2.91  |
| 0 | -4 | 14  | 75.03  | 3.12  |
| 0 | -4 | 15  | 104.47 | 2.62  |
| 0 | -3 | -13 | 25.98  | 1.56  |
| 0 | -3 | -13 | 28.00  | 1.57  |
| 0 | -3 | -13 | 24.15  | 1.20  |
| 0 | -3 | -13 | 26.78  | 1.20  |
| 0 | -3 | -12 | 101.14 | 3.91  |
| 0 | -3 | -12 | 102.15 | 3.64  |
| 0 | -3 | -12 | 109.93 | 3.25  |
| 0 | -3 | -12 | 106.21 | 3.10  |
| 0 | -3 | -11 | 28.69  | 1.69  |
| 0 | -3 | -11 | 32.23  | 2.52  |
| 0 | -3 | -11 | 32.04  | 2.09  |
| 0 | -3 | -11 | 30.37  | 2.34  |
| 0 | -3 | -11 | 33.46  | 2.00  |
| 0 | -3 | -11 | 33.52  | 2.06  |
| 0 | -3 | -10 | 313.01 | 8.04  |
| 0 | -3 | -10 | 309.17 | 7.54  |
| 0 | -3 | -10 | 328.87 | 6.82  |
| 0 | -3 | -10 | 316.92 | 7.44  |
| 0 | -3 | -10 | 336.68 | 6.45  |
| 0 | -3 | -10 | 323.01 | 6.64  |
| 0 | -3 | -10 | 332.27 | 7.04  |
| 0 | -3 | -9  | 558.22 | 10.29 |
| 0 | -3 | -9  | 542.28 | 8.95  |
| 0 | -3 | -9  | 555.99 | 9.34  |
| 0 | -3 | -9  | 544.11 | 9.71  |

## CIF 31

|   |    |    |        |      |
|---|----|----|--------|------|
| 0 | -3 | -9 | 536.35 | 9.14 |
| 0 | -3 | -9 | 541.26 | 9.52 |
| 0 | -3 | -8 | 401.51 | 8.31 |
| 0 | -3 | -8 | 389.95 | 7.33 |
| 0 | -3 | -8 | 405.21 | 7.70 |
| 0 | -3 | -8 | 402.37 | 7.91 |
| 0 | -3 | -8 | 407.88 | 7.45 |
| 0 | -3 | -8 | 421.86 | 7.96 |
| 0 | -3 | -7 | 265.16 | 6.21 |
| 0 | -3 | -7 | 261.98 | 5.61 |
| 0 | -3 | -7 | 260.54 | 5.60 |
| 0 | -3 | -7 | 258.51 | 5.82 |
| 0 | -3 | -7 | 264.73 | 5.47 |
| 0 | -3 | -7 | 244.32 | 4.91 |
| 0 | -3 | -7 | 258.80 | 5.79 |
| 0 | -3 | -6 | 46.83  | 2.56 |
| 0 | -3 | -6 | 45.54  | 3.73 |
| 0 | -3 | -6 | 50.74  | 2.37 |
| 0 | -3 | -6 | 47.81  | 2.08 |
| 0 | -3 | -6 | 51.73  | 2.05 |
| 0 | -3 | -6 | 52.01  | 2.06 |
| 0 | -3 | -6 | 53.34  | 2.38 |
| 0 | -3 | -6 | 53.95  | 2.58 |
| 0 | -3 | -5 | 3.88   | 0.90 |
| 0 | -3 | -5 | 2.24   | 0.74 |
| 0 | -3 | -5 | 2.43   | 0.72 |
| 0 | -3 | -5 | 4.19   | 0.83 |
| 0 | -3 | -5 | 2.21   | 0.70 |
| 0 | -3 | -5 | 1.64   | 0.54 |
| 0 | -3 | -5 | 2.68   | 0.65 |
| 0 | -3 | -5 | 1.65   | 0.69 |
| 0 | -3 | -5 | 2.48   | 2.10 |
| 0 | -3 | -5 | 5.27   | 0.76 |
| 0 | -3 | -4 | 77.61  | 2.52 |
| 0 | -3 | -4 | 72.86  | 2.21 |
| 0 | -3 | -4 | 79.14  | 1.81 |
| 0 | -3 | -3 | 326.74 | 5.09 |
| 0 | -3 | -3 | 326.90 | 4.92 |
| 0 | -3 | -3 | 308.28 | 4.59 |
| 0 | -3 | -3 | 328.70 | 4.37 |
| 0 | -3 | -3 | 317.17 | 5.37 |

## CIF 31

|   |    |    |         |       |
|---|----|----|---------|-------|
| 0 | -3 | -3 | 305.31  | 4.76  |
| 0 | -3 | -2 | 8.47    | 0.74  |
| 0 | -3 | -2 | 8.13    | 0.65  |
| 0 | -3 | -2 | 7.25    | 0.71  |
| 0 | -3 | -2 | 8.41    | 0.74  |
| 0 | -3 | -2 | 7.58    | 0.58  |
| 0 | -3 | -1 | 878.55  | 9.41  |
| 0 | -3 | -1 | 800.82  | 8.60  |
| 0 | -3 | -1 | 823.63  | 9.36  |
| 0 | -3 | -1 | 935.03  | 9.21  |
| 0 | -3 | -1 | 865.73  | 7.87  |
| 0 | -3 | -1 | 879.60  | 7.99  |
| 0 | -3 | -1 | 890.46  | 9.05  |
| 0 | -3 | -1 | 881.85  | 8.89  |
| 0 | -3 | 0  | 1287.36 | 11.97 |
| 0 | -3 | 0  | 1236.89 | 12.29 |
| 0 | -3 | 0  | 1164.74 | 11.07 |
| 0 | -3 | 0  | 1349.22 | 12.40 |
| 0 | -3 | 0  | 1264.19 | 12.01 |
| 0 | -3 | 0  | 1140.30 | 11.46 |
| 0 | -3 | 1  | 8400.34 | 70.03 |
| 0 | -3 | 2  | 706.99  | 8.22  |
| 0 | -3 | 2  | 768.24  | 8.05  |
| 0 | -3 | 2  | 742.06  | 7.52  |
| 0 | -3 | 2  | 700.61  | 7.54  |
| 0 | -3 | 2  | 796.15  | 8.05  |
| 0 | -3 | 2  | 819.76  | 8.46  |
| 0 | -3 | 3  | 1641.65 | 17.55 |
| 0 | -3 | 3  | 2059.94 | 17.58 |
| 0 | -3 | 3  | 1931.41 | 17.77 |
| 0 | -3 | 3  | 1797.27 | 16.60 |
| 0 | -3 | 3  | 2024.62 | 16.94 |
| 0 | -3 | 3  | 2063.42 | 17.62 |
| 0 | -3 | 3  | 2199.33 | 18.17 |
| 0 | -3 | 4  | 148.33  | 3.05  |
| 0 | -3 | 4  | 140.18  | 3.03  |
| 0 | -3 | 4  | 157.96  | 2.76  |
| 0 | -3 | 4  | 136.48  | 2.83  |
| 0 | -3 | 4  | 150.50  | 2.15  |
| 0 | -3 | 4  | 149.68  | 2.47  |
| 0 | -3 | 4  | 137.80  | 2.84  |



## CIF 31

|   |    |    |         |       |
|---|----|----|---------|-------|
| 0 | -3 | 5  | 69.66   | 2.13  |
| 0 | -3 | 5  | 70.97   | 1.80  |
| 0 | -3 | 5  | 67.95   | 2.03  |
| 0 | -3 | 5  | 56.04   | 2.08  |
| 0 | -3 | 5  | 76.99   | 2.06  |
| 0 | -3 | 5  | 65.85   | 1.71  |
| 0 | -3 | 5  | 71.77   | 2.16  |
| 0 | -3 | 5  | 82.03   | 2.42  |
| 0 | -3 | 6  | 1113.29 | 12.49 |
| 0 | -3 | 6  | 1152.66 | 12.62 |
| 0 | -3 | 6  | 1124.96 | 11.30 |
| 0 | -3 | 6  | 1139.60 | 11.92 |
| 0 | -3 | 6  | 1107.61 | 11.69 |
| 0 | -3 | 6  | 1168.13 | 12.82 |
| 0 | -3 | 7  | 634.14  | 8.60  |
| 0 | -3 | 7  | 694.75  | 9.07  |
| 0 | -3 | 7  | 650.77  | 7.81  |
| 0 | -3 | 7  | 672.86  | 8.22  |
| 0 | -3 | 7  | 671.87  | 9.23  |
| 0 | -3 | 7  | 677.76  | 9.72  |
| 0 | -3 | 8  | 600.91  | 8.37  |
| 0 | -3 | 8  | 632.99  | 9.21  |
| 0 | -3 | 8  | 640.67  | 9.56  |
| 0 | -3 | 8  | 607.98  | 10.32 |
| 0 | -3 | 9  | 291.12  | 6.33  |
| 0 | -3 | 9  | 283.39  | 5.96  |
| 0 | -3 | 10 | 13.94   | 1.44  |
| 0 | -3 | 10 | 9.21    | 1.49  |
| 0 | -3 | 10 | 6.82    | 1.28  |
| 0 | -3 | 10 | 3.14    | 0.90  |
| 0 | -3 | 10 | 6.96    | 1.25  |
| 0 | -3 | 10 | 1.73    | 1.03  |
| 0 | -3 | 11 | 12.52   | 1.62  |
| 0 | -3 | 11 | 12.78   | 1.69  |
| 0 | -3 | 11 | 11.35   | 1.72  |
| 0 | -3 | 11 | 16.09   | 1.70  |
| 0 | -3 | 11 | 12.79   | 1.58  |
| 0 | -3 | 11 | 12.79   | 1.56  |
| 0 | -3 | 12 | 101.59  | 3.86  |
| 0 | -3 | 12 | 95.87   | 3.77  |
| 0 | -3 | 12 | 97.97   | 4.08  |

## CIF 31

|   |    |     |        |       |
|---|----|-----|--------|-------|
| 0 | -3 | 12  | 91.44  | 4.18  |
| 0 | -3 | 12  | 95.32  | 3.68  |
| 0 | -3 | 13  | 10.94  | 1.32  |
| 0 | -3 | 13  | 16.08  | 1.68  |
| 0 | -3 | 13  | 13.20  | 1.70  |
| 0 | -3 | 13  | 14.24  | 1.82  |
| 0 | -3 | 14  | 21.84  | 1.70  |
| 0 | -3 | 15  | 1.69   | 0.53  |
| 0 | -2 | -14 | 119.30 | 2.92  |
| 0 | -2 | -14 | 152.63 | 2.61  |
| 0 | -2 | -13 | 71.90  | 2.88  |
| 0 | -2 | -13 | 68.02  | 2.81  |
| 0 | -2 | -13 | 73.91  | 2.27  |
| 0 | -2 | -13 | 72.39  | 2.39  |
| 0 | -2 | -13 | 73.09  | 2.43  |
| 0 | -2 | -12 | 1.22   | 1.04  |
| 0 | -2 | -12 | 1.04   | 1.09  |
| 0 | -2 | -12 | 2.01   | 0.84  |
| 0 | -2 | -12 | 2.24   | 0.84  |
| 0 | -2 | -12 | 2.49   | 0.90  |
| 0 | -2 | -11 | 717.92 | 11.59 |
| 0 | -2 | -11 | 698.94 | 12.34 |
| 0 | -2 | -11 | 712.84 | 10.49 |
| 0 | -2 | -11 | 695.82 | 11.88 |
| 0 | -2 | -11 | 691.52 | 10.93 |
| 0 | -2 | -11 | 696.25 | 10.72 |
| 0 | -2 | -11 | 719.84 | 11.11 |
| 0 | -2 | -10 | 627.12 | 10.86 |
| 0 | -2 | -10 | 540.15 | 8.61  |
| 0 | -2 | -10 | 581.05 | 9.51  |
| 0 | -2 | -10 | 584.71 | 10.74 |
| 0 | -2 | -10 | 546.94 | 9.62  |
| 0 | -2 | -10 | 539.95 | 9.33  |
| 0 | -2 | -10 | 591.94 | 10.00 |
| 0 | -2 | -9  | 54.63  | 2.49  |
| 0 | -2 | -9  | 67.60  | 3.42  |
| 0 | -2 | -9  | 57.39  | 2.77  |
| 0 | -2 | -9  | 58.72  | 3.35  |
| 0 | -2 | -9  | 55.11  | 5.60  |
| 0 | -2 | -9  | 56.66  | 2.84  |
| 0 | -2 | -9  | 52.93  | 2.81  |

## CIF 31

|   |    |    |         |       |
|---|----|----|---------|-------|
| 0 | -2 | -8 | 398.33  | 8.59  |
| 0 | -2 | -8 | 426.29  | 7.17  |
| 0 | -2 | -8 | 433.98  | 7.50  |
| 0 | -2 | -8 | 420.69  | 8.88  |
| 0 | -2 | -8 | 396.71  | 7.50  |
| 0 | -2 | -7 | 97.80   | 3.05  |
| 0 | -2 | -7 | 95.94   | 3.12  |
| 0 | -2 | -7 | 91.02   | 3.58  |
| 0 | -2 | -7 | 97.01   | 4.07  |
| 0 | -2 | -7 | 100.25  | 3.30  |
| 0 | -2 | -7 | 94.37   | 2.56  |
| 0 | -2 | -7 | 93.98   | 3.22  |
| 0 | -2 | -6 | 2.22    | 0.68  |
| 0 | -2 | -6 | 0.26    | 0.52  |
| 0 | -2 | -6 | 0.11    | 0.64  |
| 0 | -2 | -6 | 0.75    | 1.50  |
| 0 | -2 | -6 | 0.45    | 0.46  |
| 0 | -2 | -6 | 0.37    | 0.61  |
| 0 | -2 | -5 | 1285.08 | 14.20 |
| 0 | -2 | -5 | 1314.64 | 14.60 |
| 0 | -2 | -5 | 1308.71 | 14.30 |
| 0 | -2 | -5 | 1297.29 | 13.10 |
| 0 | -2 | -4 | 122.30  | 2.80  |
| 0 | -2 | -4 | 114.99  | 2.88  |
| 0 | -2 | -4 | 119.65  | 2.81  |
| 0 | -2 | -4 | 113.20  | 2.56  |
| 0 | -2 | -4 | 112.90  | 1.83  |
| 0 | -2 | -4 | 124.91  | 2.52  |
| 0 | -2 | -3 | 601.08  | 7.40  |
| 0 | -2 | -3 | 650.03  | 7.38  |
| 0 | -2 | -3 | 654.43  | 6.44  |
| 0 | -2 | -3 | 616.41  | 6.93  |
| 0 | -2 | -2 | 3259.87 | 27.71 |
| 0 | -2 | -2 | 3186.48 | 28.01 |
| 0 | -2 | -2 | 3254.40 | 28.04 |
| 0 | -2 | -2 | 3284.62 | 27.47 |
| 0 | -2 | 0  | 8.87    | 0.56  |
| 0 | -2 | 0  | 13.83   | 0.52  |
| 0 | -2 | 0  | 9.34    | 0.63  |
| 0 | -2 | 0  | 10.25   | 0.59  |
| 0 | -2 | 0  | 11.13   | 0.65  |

## CIF 31

|   |    |    |         |       |
|---|----|----|---------|-------|
| 0 | -2 | 0  | 16.13   | 0.70  |
| 0 | -2 | 1  | 249.07  | 3.37  |
| 0 | -2 | 1  | 254.43  | 3.03  |
| 0 | -2 | 1  | 278.33  | 3.14  |
| 0 | -2 | 1  | 267.60  | 3.29  |
| 0 | -2 | 4  | 477.56  | 5.62  |
| 0 | -2 | 4  | 489.85  | 5.10  |
| 0 | -2 | 4  | 451.05  | 5.31  |
| 0 | -2 | 4  | 427.29  | 5.25  |
| 0 | -2 | 4  | 461.75  | 5.82  |
| 0 | -2 | 5  | 1115.77 | 11.45 |
| 0 | -2 | 5  | 1067.31 | 10.92 |
| 0 | -2 | 5  | 1105.86 | 11.42 |
| 0 | -2 | 5  | 1084.28 | 12.02 |
| 0 | -2 | 6  | 350.43  | 5.07  |
| 0 | -2 | 6  | 343.98  | 3.67  |
| 0 | -2 | 6  | 360.27  | 5.92  |
| 0 | -2 | 6  | 353.26  | 4.49  |
| 0 | -2 | 6  | 361.76  | 5.32  |
| 0 | -2 | 6  | 355.26  | 5.82  |
| 0 | -2 | 7  | 1119.71 | 12.33 |
| 0 | -2 | 7  | 1089.86 | 13.01 |
| 0 | -2 | 7  | 1088.48 | 12.94 |
| 0 | -2 | 8  | 72.00   | 2.80  |
| 0 | -2 | 8  | 67.62   | 2.51  |
| 0 | -2 | 8  | 67.36   | 2.61  |
| 0 | -2 | 8  | 65.85   | 2.80  |
| 0 | -2 | 9  | 435.63  | 8.18  |
| 0 | -2 | 9  | 426.56  | 7.70  |
| 0 | -2 | 10 | 1295.50 | 16.97 |
| 0 | -2 | 10 | 1191.73 | 16.36 |
| 0 | -2 | 10 | 1239.16 | 16.69 |
| 0 | -2 | 10 | 1390.89 | 16.00 |
| 0 | -2 | 10 | 1107.69 | 15.21 |
| 0 | -2 | 11 | 1317.97 | 16.75 |
| 0 | -2 | 11 | 1337.48 | 17.39 |
| 0 | -2 | 11 | 1352.97 | 17.59 |
| 0 | -2 | 12 | 379.32  | 8.26  |
| 0 | -2 | 12 | 374.27  | 7.56  |
| 0 | -2 | 12 | 394.08  | 7.89  |
| 0 | -2 | 13 | 311.56  | 6.66  |

## CIF 31

|   |    |     |         |       |
|---|----|-----|---------|-------|
| 0 | -2 | 13  | 321.00  | 6.69  |
| 0 | -2 | 15  | 263.12  | 4.30  |
| 0 | -1 | -14 | 127.49  | 2.96  |
| 0 | -1 | -14 | 119.13  | 2.74  |
| 0 | -1 | -13 | 226.87  | 5.69  |
| 0 | -1 | -13 | 217.01  | 5.31  |
| 0 | -1 | -13 | 222.02  | 4.33  |
| 0 | -1 | -13 | 237.20  | 5.04  |
| 0 | -1 | -12 | 12.57   | 1.64  |
| 0 | -1 | -12 | 13.01   | 1.81  |
| 0 | -1 | -12 | 20.87   | 1.60  |
| 0 | -1 | -12 | 19.68   | 2.26  |
| 0 | -1 | -12 | 12.49   | 1.69  |
| 0 | -1 | -12 | 19.45   | 1.73  |
| 0 | -1 | -12 | 18.27   | 1.70  |
| 0 | -1 | -11 | 30.15   | 2.57  |
| 0 | -1 | -11 | 27.18   | 2.38  |
| 0 | -1 | -11 | 28.53   | 1.96  |
| 0 | -1 | -11 | 29.05   | 6.05  |
| 0 | -1 | -11 | 30.32   | 2.15  |
| 0 | -1 | -11 | 30.30   | 2.14  |
| 0 | -1 | -11 | 29.74   | 2.23  |
| 0 | -1 | -10 | 383.57  | 8.76  |
| 0 | -1 | -10 | 440.92  | 9.03  |
| 0 | -1 | -10 | 395.42  | 7.35  |
| 0 | -1 | -10 | 340.00  | 8.88  |
| 0 | -1 | -10 | 397.00  | 9.37  |
| 0 | -1 | -10 | 371.43  | 7.57  |
| 0 | -1 | -10 | 342.18  | 7.48  |
| 0 | -1 | -9  | 1103.22 | 16.98 |
| 0 | -1 | -9  | 1111.73 | 14.77 |
| 0 | -1 | -9  | 1081.80 | 14.83 |
| 0 | -1 | -8  | 41.37   | 2.42  |
| 0 | -1 | -8  | 43.32   | 1.97  |
| 0 | -1 | -8  | 40.99   | 2.63  |
| 0 | -1 | -8  | 43.96   | 2.14  |
| 0 | -1 | -8  | 49.08   | 2.77  |
| 0 | -1 | -8  | 44.66   | 2.32  |
| 0 | -1 | -7  | 1552.22 | 16.39 |
| 0 | -1 | -7  | 1473.97 | 17.16 |
| 0 | -1 | -7  | 1482.11 | 18.60 |

## CIF 31

|   |    |    |         |       |
|---|----|----|---------|-------|
| 0 | -1 | -7 | 1513.63 | 16.77 |
| 0 | -1 | -7 | 1433.47 | 17.01 |
| 0 | -1 | -6 | 528.34  | 6.29  |
| 0 | -1 | -5 | 486.48  | 7.15  |
| 0 | -1 | -5 | 497.71  | 7.05  |
| 0 | -1 | -5 | 484.64  | 6.78  |
| 0 | -1 | -4 | 77.73   | 2.26  |
| 0 | -1 | -4 | 79.44   | 2.15  |
| 0 | -1 | -4 | 83.08   | 1.71  |
| 0 | -1 | -3 | 3417.49 | 30.66 |
| 0 | -1 | -3 | 3653.30 | 29.49 |
| 0 | -1 | -1 | 277.44  | 2.79  |
| 0 | -1 | -1 | 246.92  | 2.91  |
| 0 | -1 | -1 | 264.47  | 2.91  |
| 0 | -1 | -1 | 266.37  | 2.87  |
| 0 | -1 | -1 | 265.44  | 2.65  |
| 0 | -1 | -1 | 259.49  | 2.85  |
| 0 | -1 | -1 | 259.07  | 2.68  |
| 0 | -1 | 1  | 438.18  | 4.31  |
| 0 | -1 | 1  | 457.66  | 4.09  |
| 0 | -1 | 3  | 2996.55 | 24.88 |
| 0 | -1 | 3  | 2894.45 | 24.57 |
| 0 | -1 | 4  | 1284.48 | 11.68 |
| 0 | -1 | 4  | 1262.77 | 10.74 |
| 0 | -1 | 5  | 1655.90 | 14.58 |
| 0 | -1 | 5  | 1616.28 | 15.70 |
| 0 | -1 | 6  | 914.42  | 9.23  |
| 0 | -1 | 6  | 957.27  | 10.84 |
| 0 | -1 | 6  | 860.94  | 8.25  |
| 0 | -1 | 6  | 1018.27 | 10.44 |
| 0 | -1 | 7  | 17.05   | 1.34  |
| 0 | -1 | 7  | 15.42   | 1.14  |
| 0 | -1 | 8  | 124.95  | 3.59  |
| 0 | -1 | 8  | 102.50  | 3.41  |
| 0 | -1 | 8  | 128.64  | 3.65  |
| 0 | -1 | 8  | 92.72   | 3.15  |
| 0 | -1 | 9  | 276.25  | 6.19  |
| 0 | -1 | 9  | 269.45  | 6.16  |
| 0 | -1 | 9  | 282.14  | 6.30  |
| 0 | -1 | 9  | 319.68  | 6.48  |
| 0 | -1 | 9  | 313.28  | 6.11  |

## CIF 31

|   |    |     |        |      |
|---|----|-----|--------|------|
| 0 | -1 | 10  | 118.39 | 4.20 |
| 0 | -1 | 10  | 131.07 | 4.55 |
| 0 | -1 | 10  | 138.46 | 4.42 |
| 0 | -1 | 10  | 152.28 | 4.66 |
| 0 | -1 | 10  | 133.81 | 4.78 |
| 0 | -1 | 10  | 151.87 | 4.37 |
| 0 | -1 | 11  | 290.03 | 6.46 |
| 0 | -1 | 11  | 256.58 | 6.48 |
| 0 | -1 | 11  | 305.50 | 6.63 |
| 0 | -1 | 11  | 223.30 | 6.15 |
| 0 | -1 | 11  | 251.03 | 6.89 |
| 0 | -1 | 12  | 206.88 | 5.58 |
| 0 | -1 | 12  | 214.40 | 6.07 |
| 0 | -1 | 13  | 114.47 | 3.67 |
| 0 | -1 | 13  | 100.33 | 3.69 |
| 0 | -1 | 14  | 57.45  | 2.28 |
| 0 | 0  | -15 | 31.72  | 1.43 |
| 0 | 0  | -14 | 2.60   | 0.90 |
| 0 | 0  | -14 | 1.91   | 0.71 |
| 0 | 0  | -13 | 72.88  | 3.20 |
| 0 | 0  | -13 | 74.13  | 3.05 |
| 0 | 0  | -13 | 72.48  | 3.37 |
| 0 | 0  | -13 | 87.48  | 3.19 |
| 0 | 0  | -13 | 87.07  | 3.23 |
| 0 | 0  | -12 | 424.96 | 8.68 |
| 0 | 0  | -12 | 446.16 | 7.35 |
| 0 | 0  | -12 | 436.86 | 9.94 |
| 0 | 0  | -12 | 451.47 | 8.10 |
| 0 | 0  | -12 | 431.93 | 9.15 |
| 0 | 0  | -11 | 9.19   | 1.63 |
| 0 | 0  | -11 | 11.73  | 1.31 |
| 0 | 0  | -11 | 12.21  | 1.46 |
| 0 | 0  | -11 | 9.23   | 1.57 |
| 0 | 0  | -11 | 8.92   | 4.48 |
| 0 | 0  | -11 | 10.64  | 1.53 |
| 0 | 0  | -10 | 44.98  | 3.30 |
| 0 | 0  | -10 | 42.24  | 2.97 |
| 0 | 0  | -10 | 42.52  | 3.43 |
| 0 | 0  | -10 | 46.14  | 2.90 |
| 0 | 0  | -10 | 53.77  | 3.11 |
| 0 | 0  | -10 | 43.52  | 2.26 |

## CIF 31

|   |   |     |         |       |
|---|---|-----|---------|-------|
| 0 | 0 | -10 | 43.29   | 2.56  |
| 0 | 0 | -9  | 633.40  | 11.66 |
| 0 | 0 | -9  | 739.50  | 11.85 |
| 0 | 0 | -9  | 709.62  | 11.56 |
| 0 | 0 | -9  | 750.35  | 11.77 |
| 0 | 0 | -9  | 722.18  | 9.90  |
| 0 | 0 | -9  | 682.11  | 12.73 |
| 0 | 0 | -9  | 706.26  | 10.94 |
| 0 | 0 | -9  | 673.21  | 10.46 |
| 0 | 0 | -8  | 0.24    | 0.72  |
| 0 | 0 | -8  | 2.10    | 3.27  |
| 0 | 0 | -8  | 0.47    | 0.56  |
| 0 | 0 | -8  | 0.04    | 0.70  |
| 0 | 0 | -8  | 0.78    | 0.86  |
| 0 | 0 | -8  | 0.13    | 0.79  |
| 0 | 0 | -8  | 0.70    | 0.62  |
| 0 | 0 | -8  | 1.46    | 0.83  |
| 0 | 0 | -8  | 2.17    | 0.76  |
| 0 | 0 | -8  | 0.37    | 2.60  |
| 0 | 0 | -7  | 235.92  | 5.67  |
| 0 | 0 | -7  | 251.91  | 6.11  |
| 0 | 0 | -7  | 243.46  | 4.88  |
| 0 | 0 | -7  | 231.83  | 5.45  |
| 0 | 0 | -7  | 222.56  | 5.17  |
| 0 | 0 | -6  | 516.14  | 7.61  |
| 0 | 0 | -6  | 548.87  | 5.73  |
| 0 | 0 | -5  | 571.86  | 7.29  |
| 0 | 0 | -5  | 561.92  | 7.62  |
| 0 | 0 | -4  | 4507.69 | 38.92 |
| 0 | 0 | -4  | 4481.87 | 37.13 |
| 0 | 0 | -3  | 1923.51 | 17.50 |
| 0 | 0 | -3  | 1896.47 | 17.03 |
| 0 | 0 | -1  | 86.91   | 1.12  |
| 0 | 0 | -1  | 87.50   | 1.05  |
| 0 | 0 | 1   | 106.85  | 1.30  |
| 0 | 0 | 3   | 1979.48 | 17.38 |
| 0 | 0 | 4   | 4498.50 | 37.24 |
| 0 | 0 | 4   | 4551.37 | 38.40 |
| 0 | 0 | 5   | 589.04  | 5.82  |
| 0 | 0 | 5   | 572.74  | 5.40  |
| 0 | 0 | 5   | 580.28  | 7.23  |



## CIF 31

|   |   |     |        |       |
|---|---|-----|--------|-------|
| 0 | 0 | 6   | 579.36 | 7.39  |
| 0 | 0 | 6   | 573.81 | 6.79  |
| 0 | 0 | 7   | 261.28 | 4.83  |
| 0 | 0 | 7   | 245.53 | 4.73  |
| 0 | 0 | 8   | 0.64   | 0.53  |
| 0 | 0 | 8   | 0.62   | 0.61  |
| 0 | 0 | 8   | 2.24   | 0.68  |
| 0 | 0 | 8   | 0.28   | 0.48  |
| 0 | 0 | 9   | 602.98 | 9.58  |
| 0 | 0 | 9   | 574.43 | 9.78  |
| 0 | 0 | 9   | 597.11 | 10.51 |
| 0 | 0 | 9   | 716.48 | 10.50 |
| 0 | 0 | 9   | 728.48 | 10.26 |
| 0 | 0 | 10  | 49.72  | 2.50  |
| 0 | 0 | 10  | 42.94  | 2.44  |
| 0 | 0 | 10  | 44.71  | 2.77  |
| 0 | 0 | 10  | 37.83  | 2.39  |
| 0 | 0 | 10  | 50.46  | 2.58  |
| 0 | 0 | 11  | 11.53  | 1.39  |
| 0 | 0 | 11  | 9.42   | 1.44  |
| 0 | 0 | 11  | 12.73  | 1.83  |
| 0 | 0 | 12  | 425.88 | 7.75  |
| 0 | 0 | 12  | 438.58 | 7.99  |
| 0 | 0 | 13  | 76.34  | 3.25  |
| 0 | 0 | 14  | 2.11   | 0.68  |
| 0 | 1 | -15 | 30.86  | 1.65  |
| 0 | 1 | -15 | 31.78  | 1.32  |
| 0 | 1 | -14 | 56.99  | 2.78  |
| 0 | 1 | -14 | 60.54  | 2.59  |
| 0 | 1 | -14 | 53.32  | 2.27  |
| 0 | 1 | -14 | 56.45  | 2.38  |
| 0 | 1 | -13 | 114.74 | 4.45  |
| 0 | 1 | -13 | 105.91 | 3.45  |
| 0 | 1 | -13 | 120.26 | 3.99  |
| 0 | 1 | -12 | 226.84 | 5.88  |
| 0 | 1 | -12 | 225.83 | 6.60  |
| 0 | 1 | -12 | 206.25 | 6.78  |
| 0 | 1 | -12 | 229.38 | 5.60  |
| 0 | 1 | -12 | 222.20 | 5.76  |
| 0 | 1 | -11 | 269.28 | 7.20  |
| 0 | 1 | -11 | 290.99 | 6.96  |

## CIF 31

|   |   |     |         |       |
|---|---|-----|---------|-------|
| 0 | 1 | -11 | 285.99  | 7.43  |
| 0 | 1 | -11 | 267.21  | 6.75  |
| 0 | 1 | -11 | 261.00  | 6.43  |
| 0 | 1 | -10 | 148.22  | 5.01  |
| 0 | 1 | -10 | 123.49  | 4.84  |
| 0 | 1 | -10 | 143.27  | 5.13  |
| 0 | 1 | -10 | 149.86  | 4.82  |
| 0 | 1 | -10 | 144.44  | 4.24  |
| 0 | 1 | -10 | 123.89  | 5.52  |
| 0 | 1 | -10 | 125.47  | 5.22  |
| 0 | 1 | -10 | 146.36  | 4.55  |
| 0 | 1 | -10 | 143.46  | 4.48  |
| 0 | 1 | -9  | 271.81  | 5.69  |
| 0 | 1 | -9  | 311.67  | 7.32  |
| 0 | 1 | -9  | 278.94  | 6.93  |
| 0 | 1 | -9  | 316.65  | 6.77  |
| 0 | 1 | -9  | 306.02  | 6.98  |
| 0 | 1 | -9  | 288.20  | 7.52  |
| 0 | 1 | -9  | 282.69  | 7.81  |
| 0 | 1 | -9  | 255.31  | 5.95  |
| 0 | 1 | -9  | 300.09  | 6.26  |
| 0 | 1 | -8  | 98.89   | 3.79  |
| 0 | 1 | -8  | 97.15   | 3.42  |
| 0 | 1 | -8  | 90.00   | 3.45  |
| 0 | 1 | -8  | 92.44   | 3.98  |
| 0 | 1 | -8  | 97.81   | 3.78  |
| 0 | 1 | -8  | 115.14  | 3.25  |
| 0 | 1 | -8  | 89.10   | 3.82  |
| 0 | 1 | -8  | 125.29  | 3.63  |
| 0 | 1 | -8  | 112.56  | 4.20  |
| 0 | 1 | -8  | 129.97  | 3.63  |
| 0 | 1 | -7  | 17.55   | 1.62  |
| 0 | 1 | -7  | 15.58   | 1.35  |
| 0 | 1 | -7  | 19.67   | 1.59  |
| 0 | 1 | -7  | 21.00   | 1.80  |
| 0 | 1 | -7  | 15.87   | 1.44  |
| 0 | 1 | -6  | 941.97  | 10.63 |
| 0 | 1 | -6  | 925.11  | 11.64 |
| 0 | 1 | -5  | 1558.80 | 16.43 |
| 0 | 1 | -5  | 1620.08 | 17.17 |
| 0 | 1 | -5  | 1656.42 | 16.28 |

## CIF 31

|   |   |     |         |       |
|---|---|-----|---------|-------|
| 0 | 1 | -5  | 1630.18 | 16.20 |
| 0 | 1 | -5  | 1718.56 | 14.09 |
| 0 | 1 | -4  | 1236.81 | 11.92 |
| 0 | 1 | -4  | 1267.52 | 12.51 |
| 0 | 1 | -4  | 1206.45 | 12.99 |
| 0 | 1 | -4  | 1223.05 | 12.91 |
| 0 | 1 | -4  | 1272.46 | 12.25 |
| 0 | 1 | -3  | 3056.16 | 25.94 |
| 0 | 1 | -3  | 3089.13 | 26.61 |
| 0 | 1 | -3  | 3020.26 | 25.65 |
| 0 | 1 | -1  | 405.42  | 3.83  |
| 0 | 1 | -1  | 415.75  | 4.04  |
| 0 | 1 | 1   | 280.41  | 2.75  |
| 0 | 1 | 1   | 242.11  | 2.62  |
| 0 | 1 | 3   | 3532.38 | 29.90 |
| 0 | 1 | 3   | 3541.75 | 29.67 |
| 0 | 1 | 4   | 88.33   | 1.87  |
| 0 | 1 | 4   | 86.49   | 2.00  |
| 0 | 1 | 5   | 532.72  | 6.27  |
| 0 | 1 | 5   | 536.28  | 6.67  |
| 0 | 1 | 6   | 523.40  | 7.04  |
| 0 | 1 | 6   | 534.53  | 7.17  |
| 0 | 1 | 6   | 572.99  | 7.61  |
| 0 | 1 | 6   | 603.54  | 7.74  |
| 0 | 1 | 7   | 1262.79 | 14.75 |
| 0 | 1 | 7   | 1323.01 | 15.30 |
| 0 | 1 | 7   | 1604.60 | 16.26 |
| 0 | 1 | 7   | 1548.60 | 16.09 |
| 0 | 1 | 7   | 1452.16 | 15.68 |
| 0 | 1 | 8   | 38.77   | 1.99  |
| 0 | 1 | 8   | 40.67   | 2.15  |
| 0 | 1 | 9   | 1208.55 | 14.86 |
| 0 | 1 | 9   | 1245.38 | 15.59 |
| 0 | 1 | 10  | 392.05  | 7.37  |
| 0 | 1 | 10  | 392.89  | 8.85  |
| 0 | 1 | 11  | 29.53   | 1.88  |
| 0 | 1 | 11  | 24.51   | 2.24  |
| 0 | 1 | 12  | 18.67   | 1.58  |
| 0 | 1 | 12  | 16.60   | 1.89  |
| 0 | 1 | 13  | 208.05  | 4.84  |
| 0 | 2 | -15 | 311.46  | 4.20  |

## CIF 31

|   |   |     |         |       |
|---|---|-----|---------|-------|
| 0 | 2 | -15 | 272.19  | 3.98  |
| 0 | 2 | -14 | 249.74  | 4.73  |
| 0 | 2 | -14 | 231.20  | 5.89  |
| 0 | 2 | -14 | 274.14  | 5.37  |
| 0 | 2 | -14 | 280.00  | 5.64  |
| 0 | 2 | -13 | 300.70  | 7.47  |
| 0 | 2 | -13 | 301.40  | 6.98  |
| 0 | 2 | -13 | 317.54  | 6.80  |
| 0 | 2 | -12 | 385.96  | 8.85  |
| 0 | 2 | -12 | 404.71  | 7.96  |
| 0 | 2 | -12 | 412.38  | 8.13  |
| 0 | 2 | -11 | 1238.60 | 19.74 |
| 0 | 2 | -11 | 1275.93 | 19.21 |
| 0 | 2 | -11 | 1258.08 | 18.39 |
| 0 | 2 | -11 | 1363.67 | 16.46 |
| 0 | 2 | -11 | 1282.01 | 16.56 |
| 0 | 2 | -11 | 1355.98 | 18.74 |
| 0 | 2 | -11 | 1433.42 | 17.49 |
| 0 | 2 | -10 | 1287.49 | 18.74 |
| 0 | 2 | -10 | 1265.25 | 18.18 |
| 0 | 2 | -10 | 1394.07 | 18.02 |
| 0 | 2 | -10 | 1204.82 | 19.61 |
| 0 | 2 | -10 | 1334.34 | 15.94 |
| 0 | 2 | -10 | 1173.38 | 18.84 |
| 0 | 2 | -10 | 1193.66 | 15.82 |
| 0 | 2 | -10 | 1442.72 | 16.95 |
| 0 | 2 | -9  | 392.01  | 8.54  |
| 0 | 2 | -9  | 409.38  | 8.92  |
| 0 | 2 | -9  | 421.45  | 8.35  |
| 0 | 2 | -9  | 354.31  | 8.98  |
| 0 | 2 | -9  | 397.02  | 7.00  |
| 0 | 2 | -9  | 388.30  | 9.20  |
| 0 | 2 | -9  | 402.65  | 7.33  |
| 0 | 2 | -9  | 435.43  | 8.73  |
| 0 | 2 | -9  | 376.73  | 7.98  |
| 0 | 2 | -9  | 424.95  | 7.58  |
| 0 | 2 | -9  | 410.82  | 7.01  |
| 0 | 2 | -8  | 66.39   | 2.70  |
| 0 | 2 | -8  | 73.05   | 3.50  |
| 0 | 2 | -8  | 69.91   | 3.20  |
| 0 | 2 | -8  | 72.40   | 3.62  |

## CIF 31

|   |   |    |         |       |
|---|---|----|---------|-------|
| 0 | 2 | -8 | 65.03   | 2.93  |
| 0 | 2 | -8 | 58.81   | 2.28  |
| 0 | 2 | -8 | 67.81   | 3.31  |
| 0 | 2 | -8 | 57.85   | 2.41  |
| 0 | 2 | -8 | 76.13   | 3.12  |
| 0 | 2 | -8 | 62.92   | 3.54  |
| 0 | 2 | -8 | 57.57   | 3.60  |
| 0 | 2 | -7 | 1092.36 | 14.27 |
| 0 | 2 | -7 | 1087.47 | 14.01 |
| 0 | 2 | -7 | 1111.87 | 13.47 |
| 0 | 2 | -7 | 1070.84 | 14.42 |
| 0 | 2 | -7 | 1037.25 | 12.34 |
| 0 | 2 | -7 | 1055.85 | 13.95 |
| 0 | 2 | -7 | 1064.50 | 13.53 |
| 0 | 2 | -7 | 1028.28 | 12.71 |
| 0 | 2 | -6 | 356.30  | 6.11  |
| 0 | 2 | -6 | 360.67  | 6.59  |
| 0 | 2 | -6 | 362.18  | 5.81  |
| 0 | 2 | -6 | 353.26  | 5.69  |
| 0 | 2 | -6 | 362.55  | 5.97  |
| 0 | 2 | -6 | 346.29  | 3.61  |
| 0 | 2 | -5 | 1088.91 | 11.16 |
| 0 | 2 | -5 | 1100.16 | 12.36 |
| 0 | 2 | -5 | 1150.24 | 12.99 |
| 0 | 2 | -5 | 1135.57 | 11.67 |
| 0 | 2 | -5 | 1126.46 | 12.07 |
| 0 | 2 | -5 | 1096.97 | 11.75 |
| 0 | 2 | -5 | 1162.11 | 12.38 |
| 0 | 2 | -5 | 1046.20 | 10.67 |
| 0 | 2 | -4 | 446.78  | 5.34  |
| 0 | 2 | -4 | 434.78  | 6.23  |
| 0 | 2 | -4 | 434.87  | 6.11  |
| 0 | 2 | -4 | 442.74  | 5.74  |
| 0 | 2 | -4 | 447.78  | 5.75  |
| 0 | 2 | -3 | 6902.00 | 58.96 |
| 0 | 2 | -3 | 7094.55 | 58.90 |
| 0 | 2 | -1 | 261.76  | 3.41  |
| 0 | 2 | -1 | 262.86  | 3.22  |
| 0 | 2 | -1 | 271.68  | 3.34  |
| 0 | 2 | -1 | 249.11  | 3.05  |
| 0 | 2 | -1 | 257.44  | 2.98  |

## CIF 31

|   |   |     |         |       |
|---|---|-----|---------|-------|
| 0 | 2 | -1  | 267.50  | 3.14  |
| 0 | 2 | 0   | 11.60   | 0.54  |
| 0 | 2 | 0   | 6.99    | 0.48  |
| 0 | 2 | 0   | 10.38   | 0.43  |
| 0 | 2 | 0   | 11.61   | 0.37  |
| 0 | 2 | 0   | 8.72    | 0.46  |
| 0 | 2 | 0   | 7.68    | 0.50  |
| 0 | 2 | 2   | 3207.64 | 24.73 |
| 0 | 2 | 2   | 2794.12 | 23.85 |
| 0 | 2 | 2   | 2942.32 | 26.25 |
| 0 | 2 | 2   | 3333.36 | 25.35 |
| 0 | 2 | 3   | 557.77  | 5.74  |
| 0 | 2 | 3   | 582.83  | 6.18  |
| 0 | 2 | 4   | 111.08  | 2.21  |
| 0 | 2 | 4   | 96.22   | 1.89  |
| 0 | 2 | 4   | 109.08  | 2.09  |
| 0 | 2 | 4   | 101.07  | 2.29  |
| 0 | 2 | 5   | 1162.10 | 11.93 |
| 0 | 2 | 5   | 1109.81 | 12.65 |
| 0 | 2 | 6   | 0.02    | 0.37  |
| 0 | 2 | 7   | 108.17  | 2.97  |
| 0 | 2 | 7   | 110.20  | 3.22  |
| 0 | 2 | 8   | 420.16  | 7.39  |
| 0 | 2 | 8   | 397.90  | 7.64  |
| 0 | 2 | 9   | 63.16   | 2.55  |
| 0 | 2 | 9   | 67.92   | 2.89  |
| 0 | 2 | 10  | 525.13  | 11.01 |
| 0 | 2 | 10  | 619.86  | 9.84  |
| 0 | 2 | 11  | 638.35  | 11.86 |
| 0 | 2 | 11  | 749.22  | 10.92 |
| 0 | 2 | 12  | 3.57    | 0.97  |
| 0 | 2 | 12  | 2.00    | 1.01  |
| 0 | 2 | 13  | 63.99   | 2.43  |
| 0 | 3 | -15 | 2.08    | 0.78  |
| 0 | 3 | -15 | 2.39    | 0.65  |
| 0 | 3 | -15 | 1.29    | 0.65  |
| 0 | 3 | -14 | 22.90   | 2.02  |
| 0 | 3 | -14 | 22.29   | 1.44  |
| 0 | 3 | -14 | 25.02   | 1.77  |
| 0 | 3 | -13 | 15.53   | 1.91  |
| 0 | 3 | -13 | 13.90   | 1.80  |

## CIF 31

|   |   |     |        |       |
|---|---|-----|--------|-------|
| 0 | 3 | -13 | 11.75  | 1.74  |
| 0 | 3 | -13 | 10.79  | 3.01  |
| 0 | 3 | -13 | 11.06  | 1.46  |
| 0 | 3 | -12 | 99.36  | 3.68  |
| 0 | 3 | -12 | 91.88  | 4.58  |
| 0 | 3 | -12 | 91.03  | 4.30  |
| 0 | 3 | -12 | 102.74 | 4.48  |
| 0 | 3 | -12 | 93.88  | 3.41  |
| 0 | 3 | -12 | 104.95 | 3.98  |
| 0 | 3 | -11 | 11.84  | 2.04  |
| 0 | 3 | -11 | 15.39  | 2.05  |
| 0 | 3 | -11 | 15.61  | 2.01  |
| 0 | 3 | -11 | 11.32  | 3.09  |
| 0 | 3 | -11 | 13.62  | 2.13  |
| 0 | 3 | -11 | 9.30   | 1.36  |
| 0 | 3 | -11 | 9.51   | 1.35  |
| 0 | 3 | -11 | 10.42  | 1.52  |
| 0 | 3 | -10 | 1.58   | 1.15  |
| 0 | 3 | -10 | 1.80   | 1.17  |
| 0 | 3 | -10 | 2.48   | 1.16  |
| 0 | 3 | -10 | 2.80   | 2.81  |
| 0 | 3 | -10 | 1.65   | 1.11  |
| 0 | 3 | -10 | 1.79   | 1.27  |
| 0 | 3 | -10 | 2.39   | 0.87  |
| 0 | 3 | -10 | 1.62   | 0.83  |
| 0 | 3 | -10 | 2.76   | 1.00  |
| 0 | 3 | -9  | 244.99 | 7.01  |
| 0 | 3 | -9  | 230.19 | 7.18  |
| 0 | 3 | -9  | 262.63 | 6.92  |
| 0 | 3 | -9  | 261.07 | 6.51  |
| 0 | 3 | -9  | 239.07 | 6.60  |
| 0 | 3 | -9  | 272.54 | 5.55  |
| 0 | 3 | -9  | 280.14 | 5.77  |
| 0 | 3 | -9  | 280.42 | 6.02  |
| 0 | 3 | -8  | 593.07 | 8.86  |
| 0 | 3 | -8  | 616.08 | 9.81  |
| 0 | 3 | -8  | 660.41 | 10.91 |
| 0 | 3 | -8  | 647.57 | 11.15 |
| 0 | 3 | -8  | 617.72 | 9.48  |
| 0 | 3 | -8  | 543.53 | 11.09 |
| 0 | 3 | -8  | 579.63 | 11.15 |

## CIF 31

|   |   |    |         |       |
|---|---|----|---------|-------|
| 0 | 3 | -8 | 632.16  | 8.70  |
| 0 | 3 | -8 | 656.07  | 10.26 |
| 0 | 3 | -8 | 642.33  | 10.79 |
| 0 | 3 | -8 | 573.96  | 9.60  |
| 0 | 3 | -8 | 617.25  | 9.02  |
| 0 | 3 | -7 | 689.90  | 8.59  |
| 0 | 3 | -7 | 679.50  | 10.11 |
| 0 | 3 | -7 | 682.72  | 10.37 |
| 0 | 3 | -7 | 662.48  | 9.98  |
| 0 | 3 | -7 | 742.67  | 11.34 |
| 0 | 3 | -7 | 652.82  | 11.28 |
| 0 | 3 | -7 | 686.40  | 11.04 |
| 0 | 3 | -7 | 679.34  | 9.82  |
| 0 | 3 | -7 | 735.62  | 9.98  |
| 0 | 3 | -7 | 713.42  | 10.82 |
| 0 | 3 | -7 | 703.40  | 10.95 |
| 0 | 3 | -6 | 1202.08 | 12.18 |
| 0 | 3 | -6 | 1107.63 | 13.87 |
| 0 | 3 | -6 | 1153.89 | 13.54 |
| 0 | 3 | -6 | 1252.30 | 12.97 |
| 0 | 3 | -6 | 1184.84 | 13.91 |
| 0 | 3 | -6 | 1106.85 | 14.25 |
| 0 | 3 | -6 | 1154.78 | 13.12 |
| 0 | 3 | -6 | 1075.61 | 12.07 |
| 0 | 3 | -5 | 72.13   | 1.89  |
| 0 | 3 | -5 | 69.83   | 2.49  |
| 0 | 3 | -5 | 64.06   | 2.32  |
| 0 | 3 | -5 | 72.67   | 2.13  |
| 0 | 3 | -5 | 65.55   | 2.17  |
| 0 | 3 | -5 | 71.39   | 2.49  |
| 0 | 3 | -5 | 71.18   | 2.29  |
| 0 | 3 | -4 | 148.85  | 2.61  |
| 0 | 3 | -4 | 147.06  | 3.46  |
| 0 | 3 | -4 | 148.34  | 3.38  |
| 0 | 3 | -4 | 152.71  | 3.28  |
| 0 | 3 | -4 | 148.20  | 3.58  |
| 0 | 3 | -4 | 159.11  | 2.97  |
| 0 | 3 | -4 | 150.34  | 3.44  |
| 0 | 3 | -4 | 151.81  | 3.51  |
| 0 | 3 | -4 | 146.34  | 2.68  |
| 0 | 3 | -3 | 1842.08 | 18.34 |



## CIF 31

|   |   |    |         |       |
|---|---|----|---------|-------|
| 0 | 3 | -3 | 1807.02 | 16.71 |
| 0 | 3 | -3 | 1973.83 | 18.45 |
| 0 | 3 | -3 | 1935.92 | 17.54 |
| 0 | 3 | -3 | 1958.00 | 17.30 |
| 0 | 3 | -3 | 1728.10 | 17.20 |
| 0 | 3 | -3 | 1787.03 | 18.31 |
| 0 | 3 | -3 | 1959.92 | 19.08 |
| 0 | 3 | -3 | 1973.67 | 17.62 |
| 0 | 3 | -2 | 689.79  | 7.58  |
| 0 | 3 | -2 | 736.17  | 8.40  |
| 0 | 3 | -2 | 720.13  | 7.39  |
| 0 | 3 | -2 | 770.83  | 7.81  |
| 0 | 3 | -2 | 718.36  | 8.49  |
| 0 | 3 | -2 | 723.18  | 8.34  |
| 0 | 3 | -2 | 780.93  | 7.99  |
| 0 | 3 | -1 | 8991.83 | 75.62 |
| 0 | 3 | -1 | 9196.85 | 76.09 |
| 0 | 3 | 0  | 1326.97 | 12.14 |
| 0 | 3 | 0  | 1274.83 | 12.05 |
| 0 | 3 | 0  | 1299.07 | 11.59 |
| 0 | 3 | 0  | 1229.35 | 13.98 |
| 0 | 3 | 0  | 1202.32 | 12.10 |
| 0 | 3 | 0  | 1339.64 | 12.02 |
| 0 | 3 | 1  | 824.70  | 8.02  |
| 0 | 3 | 1  | 781.21  | 8.67  |
| 0 | 3 | 1  | 903.02  | 8.03  |
| 0 | 3 | 1  | 800.14  | 10.29 |
| 0 | 3 | 1  | 925.50  | 8.72  |
| 0 | 3 | 2  | 7.99    | 0.67  |
| 0 | 3 | 2  | 7.55    | 0.43  |
| 0 | 3 | 2  | 8.12    | 0.62  |
| 0 | 3 | 2  | 8.08    | 0.89  |
| 0 | 3 | 3  | 312.84  | 3.83  |
| 0 | 3 | 3  | 315.69  | 4.52  |
| 0 | 3 | 4  | 77.51   | 1.80  |
| 0 | 3 | 4  | 75.53   | 2.25  |
| 0 | 3 | 4  | 80.51   | 2.70  |
| 0 | 3 | 4  | 73.21   | 2.15  |
| 0 | 3 | 5  | 1.98    | 0.44  |
| 0 | 3 | 5  | 6.73    | 0.94  |
| 0 | 3 | 6  | 50.52   | 1.80  |

## CIF 31

|   |   |     |        |      |
|---|---|-----|--------|------|
| 0 | 3 | 6   | 49.31  | 2.21 |
| 0 | 3 | 6   | 54.54  | 2.20 |
| 0 | 3 | 7   | 241.30 | 5.86 |
| 0 | 3 | 7   | 244.45 | 6.26 |
| 0 | 3 | 8   | 423.08 | 7.51 |
| 0 | 3 | 8   | 380.36 | 8.06 |
| 0 | 3 | 9   | 560.91 | 9.27 |
| 0 | 3 | 10  | 325.52 | 6.73 |
| 0 | 3 | 10  | 325.57 | 6.69 |
| 0 | 3 | 11  | 33.51  | 1.99 |
| 0 | 3 | 11  | 26.44  | 2.39 |
| 0 | 4 | -15 | 118.76 | 2.66 |
| 0 | 4 | -15 | 108.85 | 2.88 |
| 0 | 4 | -14 | 70.04  | 3.29 |
| 0 | 4 | -14 | 85.88  | 3.08 |
| 0 | 4 | -13 | 185.18 | 5.95 |
| 0 | 4 | -13 | 183.84 | 5.91 |
| 0 | 4 | -13 | 194.86 | 4.64 |
| 0 | 4 | -12 | 14.09  | 2.23 |
| 0 | 4 | -12 | 15.58  | 2.09 |
| 0 | 4 | -12 | 16.73  | 2.19 |
| 0 | 4 | -12 | 18.58  | 1.61 |
| 0 | 4 | -12 | 19.76  | 1.65 |
| 0 | 4 | -12 | 22.26  | 2.02 |
| 0 | 4 | -11 | 15.69  | 2.36 |
| 0 | 4 | -11 | 16.56  | 2.25 |
| 0 | 4 | -11 | 17.88  | 2.27 |
| 0 | 4 | -11 | 19.13  | 2.20 |
| 0 | 4 | -11 | 16.09  | 3.61 |
| 0 | 4 | -11 | 15.81  | 1.57 |
| 0 | 4 | -11 | 12.16  | 1.92 |
| 0 | 4 | -11 | 21.70  | 1.70 |
| 0 | 4 | -11 | 17.96  | 1.85 |
| 0 | 4 | -10 | 178.11 | 4.71 |
| 0 | 4 | -10 | 189.25 | 6.35 |
| 0 | 4 | -10 | 188.20 | 6.20 |
| 0 | 4 | -10 | 168.93 | 6.61 |
| 0 | 4 | -10 | 183.12 | 4.71 |
| 0 | 4 | -10 | 186.65 | 5.78 |
| 0 | 4 | -10 | 195.48 | 6.82 |
| 0 | 4 | -9  | 9.36   | 1.32 |

## CIF 31

|   |   |    |        |      |
|---|---|----|--------|------|
| 0 | 4 | -9 | 14.42  | 1.74 |
| 0 | 4 | -9 | 13.61  | 1.89 |
| 0 | 4 | -9 | 12.41  | 1.80 |
| 0 | 4 | -9 | 9.08   | 2.57 |
| 0 | 4 | -9 | 13.43  | 1.82 |
| 0 | 4 | -9 | 9.34   | 1.16 |
| 0 | 4 | -9 | 12.62  | 1.61 |
| 0 | 4 | -8 | 11.16  | 2.16 |
| 0 | 4 | -8 | 12.13  | 1.77 |
| 0 | 4 | -8 | 10.44  | 1.45 |
| 0 | 4 | -8 | 7.35   | 1.45 |
| 0 | 4 | -8 | 8.47   | 1.41 |
| 0 | 4 | -8 | 7.65   | 1.51 |
| 0 | 4 | -8 | 7.72   | 0.98 |
| 0 | 4 | -8 | 13.73  | 1.77 |
| 0 | 4 | -8 | 8.53   | 1.24 |
| 0 | 4 | -8 | 9.41   | 1.40 |
| 0 | 4 | -8 | 8.45   | 1.30 |
| 0 | 4 | -8 | 7.15   | 1.02 |
| 0 | 4 | -7 | 63.17  | 2.69 |
| 0 | 4 | -7 | 63.07  | 2.07 |
| 0 | 4 | -7 | 58.97  | 2.97 |
| 0 | 4 | -7 | 50.07  | 2.59 |
| 0 | 4 | -7 | 51.11  | 2.73 |
| 0 | 4 | -7 | 58.11  | 2.90 |
| 0 | 4 | -7 | 70.46  | 2.94 |
| 0 | 4 | -7 | 53.07  | 3.02 |
| 0 | 4 | -7 | 53.51  | 2.96 |
| 0 | 4 | -7 | 58.24  | 3.12 |
| 0 | 4 | -7 | 62.74  | 2.42 |
| 0 | 4 | -7 | 56.57  | 2.66 |
| 0 | 4 | -7 | 57.12  | 2.85 |
| 0 | 4 | -7 | 65.41  | 2.95 |
| 0 | 4 | -6 | 442.95 | 7.54 |
| 0 | 4 | -6 | 403.79 | 5.68 |
| 0 | 4 | -6 | 426.58 | 7.65 |
| 0 | 4 | -6 | 410.80 | 6.69 |
| 0 | 4 | -6 | 430.51 | 7.41 |
| 0 | 4 | -6 | 400.44 | 6.32 |
| 0 | 4 | -6 | 427.30 | 7.83 |
| 0 | 4 | -6 | 395.17 | 7.86 |

## CIF 31

|   |   |    |         |       |
|---|---|----|---------|-------|
| 0 | 4 | -6 | 391.88  | 6.23  |
| 0 | 4 | -6 | 414.13  | 7.89  |
| 0 | 4 | -6 | 384.25  | 7.81  |
| 0 | 4 | -6 | 434.50  | 6.96  |
| 0 | 4 | -6 | 429.08  | 7.65  |
| 0 | 4 | -6 | 402.04  | 6.86  |
| 0 | 4 | -5 | 184.20  | 3.28  |
| 0 | 4 | -5 | 172.54  | 4.50  |
| 0 | 4 | -5 | 178.87  | 3.92  |
| 0 | 4 | -5 | 207.63  | 4.19  |
| 0 | 4 | -5 | 188.37  | 4.45  |
| 0 | 4 | -5 | 206.40  | 3.90  |
| 0 | 4 | -5 | 180.48  | 4.43  |
| 0 | 4 | -5 | 176.69  | 4.42  |
| 0 | 4 | -5 | 177.12  | 3.40  |
| 0 | 4 | -4 | 4.90    | 0.96  |
| 0 | 4 | -4 | 6.69    | 0.67  |
| 0 | 4 | -4 | 7.04    | 1.00  |
| 0 | 4 | -4 | 3.21    | 0.78  |
| 0 | 4 | -4 | 4.52    | 0.79  |
| 0 | 4 | -4 | 6.89    | 0.97  |
| 0 | 4 | -4 | 4.16    | 0.69  |
| 0 | 4 | -4 | 7.65    | 0.99  |
| 0 | 4 | -4 | 3.79    | 0.74  |
| 0 | 4 | -4 | 4.80    | 0.91  |
| 0 | 4 | -4 | 10.71   | 0.93  |
| 0 | 4 | -3 | 72.81   | 2.37  |
| 0 | 4 | -3 | 59.38   | 1.63  |
| 0 | 4 | -3 | 63.57   | 2.65  |
| 0 | 4 | -3 | 66.01   | 2.29  |
| 0 | 4 | -3 | 66.98   | 2.39  |
| 0 | 4 | -3 | 63.67   | 2.31  |
| 0 | 4 | -3 | 57.81   | 1.79  |
| 0 | 4 | -3 | 61.19   | 1.90  |
| 0 | 4 | -3 | 55.31   | 1.86  |
| 0 | 4 | -3 | 69.54   | 2.05  |
| 0 | 4 | -3 | 71.70   | 2.25  |
| 0 | 4 | -2 | 1995.56 | 18.97 |
| 0 | 4 | -2 | 2035.56 | 17.72 |
| 0 | 4 | -2 | 1996.49 | 19.48 |
| 0 | 4 | -2 | 1856.66 | 19.30 |

## CIF 31

|   |   |    |         |       |
|---|---|----|---------|-------|
| 0 | 4 | -2 | 1882.20 | 17.91 |
| 0 | 4 | -2 | 1915.74 | 17.87 |
| 0 | 4 | -2 | 1907.72 | 19.15 |
| 0 | 4 | -2 | 1829.04 | 20.65 |
| 0 | 4 | -2 | 1862.07 | 18.57 |
| 0 | 4 | -2 | 2028.42 | 19.48 |
| 0 | 4 | -2 | 1923.23 | 17.98 |
| 0 | 4 | -2 | 1882.25 | 18.18 |
| 0 | 4 | -1 | 3291.40 | 28.22 |
| 0 | 4 | -1 | 2957.04 | 27.80 |
| 0 | 4 | -1 | 3129.67 | 27.79 |
| 0 | 4 | -1 | 3122.71 | 28.82 |
| 0 | 4 | -1 | 3137.45 | 29.04 |
| 0 | 4 | -1 | 3123.32 | 27.55 |
| 0 | 4 | -1 | 3102.42 | 27.16 |
| 0 | 4 | -1 | 3099.06 | 28.50 |
| 0 | 4 | -1 | 3141.50 | 29.32 |
| 0 | 4 | -1 | 3126.66 | 27.49 |
| 0 | 4 | 0  | 106.02  | 2.25  |
| 0 | 4 | 0  | 83.11   | 2.20  |
| 0 | 4 | 0  | 99.37   | 2.36  |
| 0 | 4 | 0  | 94.02   | 2.26  |
| 0 | 4 | 0  | 94.87   | 2.57  |
| 0 | 4 | 0  | 91.67   | 2.66  |
| 0 | 4 | 0  | 104.99  | 1.98  |
| 0 | 4 | 0  | 107.16  | 2.55  |
| 0 | 4 | 0  | 90.74   | 3.20  |
| 0 | 4 | 0  | 94.13   | 2.93  |
| 0 | 4 | 0  | 104.79  | 2.24  |
| 0 | 4 | 1  | 5932.80 | 50.34 |
| 0 | 4 | 1  | 5963.20 | 51.67 |
| 0 | 4 | 1  | 6145.07 | 52.61 |
| 0 | 4 | 1  | 6229.61 | 50.30 |
| 0 | 4 | 1  | 6040.38 | 51.36 |
| 0 | 4 | 1  | 5972.61 | 51.91 |
| 0 | 4 | 1  | 6053.61 | 53.60 |
| 0 | 4 | 1  | 6056.15 | 51.25 |
| 0 | 4 | 1  | 6183.51 | 51.72 |
| 0 | 4 | 2  | 3052.02 | 26.53 |
| 0 | 4 | 2  | 2964.53 | 26.42 |
| 0 | 4 | 2  | 2785.94 | 26.67 |

## CIF 31

|   |   |     |         |       |
|---|---|-----|---------|-------|
| 0 | 4 | 2   | 2863.59 | 24.56 |
| 0 | 4 | 2   | 2925.18 | 28.29 |
| 0 | 4 | 2   | 2895.62 | 25.96 |
| 0 | 4 | 3   | 2149.62 | 19.61 |
| 0 | 4 | 3   | 1941.81 | 20.13 |
| 0 | 4 | 3   | 1949.16 | 17.21 |
| 0 | 4 | 3   | 1723.74 | 20.51 |
| 0 | 4 | 3   | 1907.46 | 21.08 |
| 0 | 4 | 3   | 2085.73 | 19.24 |
| 0 | 4 | 4   | 313.96  | 6.48  |
| 0 | 4 | 4   | 315.71  | 5.34  |
| 0 | 4 | 5   | 11.44   | 1.14  |
| 0 | 4 | 5   | 9.67    | 1.25  |
| 0 | 4 | 5   | 11.36   | 1.07  |
| 0 | 4 | 6   | 115.21  | 3.52  |
| 0 | 4 | 6   | 101.13  | 4.03  |
| 0 | 4 | 6   | 101.92  | 3.64  |
| 0 | 4 | 6   | 113.62  | 3.38  |
| 0 | 4 | 7   | 96.12   | 3.42  |
| 0 | 4 | 7   | 85.08   | 3.72  |
| 0 | 4 | 7   | 91.43   | 3.22  |
| 0 | 4 | 7   | 83.98   | 3.96  |
| 0 | 4 | 8   | 888.98  | 12.25 |
| 0 | 4 | 8   | 844.95  | 11.77 |
| 0 | 4 | 9   | 758.47  | 11.18 |
| 0 | 4 | 9   | 743.82  | 10.87 |
| 0 | 4 | 10  | 29.87   | 1.92  |
| 0 | 4 | 10  | 23.84   | 2.04  |
| 0 | 4 | 10  | 26.01   | 2.40  |
| 0 | 4 | 11  | 98.71   | 3.96  |
| 0 | 4 | 12  | 35.14   | 1.66  |
| 0 | 5 | -15 | 290.18  | 4.86  |
| 0 | 5 | -14 | 394.82  | 8.02  |
| 0 | 5 | -14 | 455.44  | 7.48  |
| 0 | 5 | -13 | 97.63   | 4.69  |
| 0 | 5 | -13 | 100.72  | 4.34  |
| 0 | 5 | -13 | 108.44  | 4.43  |
| 0 | 5 | -13 | 97.08   | 3.20  |
| 0 | 5 | -12 | 25.24   | 2.62  |
| 0 | 5 | -12 | 26.27   | 2.54  |
| 0 | 5 | -12 | 34.82   | 2.10  |

## CIF 31

|   |   |     |        |      |
|---|---|-----|--------|------|
| 0 | 5 | -12 | 36.02  | 2.42 |
| 0 | 5 | -12 | 28.99  | 2.98 |
| 0 | 5 | -11 | 1.71   | 1.46 |
| 0 | 5 | -11 | 2.26   | 1.30 |
| 0 | 5 | -11 | 0.64   | 1.37 |
| 0 | 5 | -11 | 2.28   | 1.48 |
| 0 | 5 | -11 | 5.37   | 1.11 |
| 0 | 5 | -10 | 1.81   | 1.55 |
| 0 | 5 | -10 | 1.24   | 1.36 |
| 0 | 5 | -10 | 0.76   | 1.26 |
| 0 | 5 | -10 | 1.21   | 3.05 |
| 0 | 5 | -10 | 1.28   | 0.87 |
| 0 | 5 | -10 | 1.62   | 1.23 |
| 0 | 5 | -10 | 0.64   | 0.89 |
| 0 | 5 | -10 | 1.73   | 1.17 |
| 0 | 5 | -10 | 1.51   | 1.09 |
| 0 | 5 | -9  | 8.58   | 1.54 |
| 0 | 5 | -9  | 8.90   | 2.42 |
| 0 | 5 | -9  | 8.84   | 1.73 |
| 0 | 5 | -9  | 8.52   | 1.16 |
| 0 | 5 | -9  | 7.14   | 1.38 |
| 0 | 5 | -9  | 6.34   | 1.43 |
| 0 | 5 | -9  | 6.51   | 1.37 |
| 0 | 5 | -9  | 12.00  | 1.29 |
| 0 | 5 | -9  | 7.29   | 1.68 |
| 0 | 5 | -8  | 345.59 | 8.21 |
| 0 | 5 | -8  | 334.07 | 8.65 |
| 0 | 5 | -8  | 358.27 | 8.05 |
| 0 | 5 | -8  | 347.33 | 8.02 |
| 0 | 5 | -8  | 385.85 | 8.69 |
| 0 | 5 | -8  | 332.71 | 7.74 |
| 0 | 5 | -8  | 359.80 | 6.70 |
| 0 | 5 | -8  | 354.00 | 7.51 |
| 0 | 5 | -8  | 357.76 | 7.04 |
| 0 | 5 | -7  | 394.15 | 8.38 |
| 0 | 5 | -7  | 395.81 | 8.30 |
| 0 | 5 | -7  | 386.15 | 8.60 |
| 0 | 5 | -7  | 394.70 | 8.13 |
| 0 | 5 | -7  | 438.84 | 7.59 |
| 0 | 5 | -7  | 344.23 | 8.34 |
| 0 | 5 | -7  | 389.93 | 8.05 |

## CIF 31

|   |   |    |        |      |
|---|---|----|--------|------|
| 0 | 5 | -7 | 401.45 | 6.88 |
| 0 | 5 | -7 | 391.46 | 8.38 |
| 0 | 5 | -7 | 418.68 | 7.28 |
| 0 | 5 | -6 | 167.05 | 4.65 |
| 0 | 5 | -6 | 160.74 | 3.32 |
| 0 | 5 | -6 | 169.41 | 4.47 |
| 0 | 5 | -6 | 162.29 | 4.70 |
| 0 | 5 | -6 | 165.62 | 4.51 |
| 0 | 5 | -6 | 170.07 | 4.29 |
| 0 | 5 | -6 | 161.95 | 4.20 |
| 0 | 5 | -6 | 169.72 | 4.87 |
| 0 | 5 | -6 | 174.36 | 5.21 |
| 0 | 5 | -6 | 163.38 | 3.91 |
| 0 | 5 | -6 | 167.83 | 4.97 |
| 0 | 5 | -6 | 155.36 | 4.64 |
| 0 | 5 | -6 | 151.93 | 4.83 |
| 0 | 5 | -5 | 472.64 | 8.09 |
| 0 | 5 | -5 | 474.39 | 6.29 |
| 0 | 5 | -5 | 481.94 | 8.33 |
| 0 | 5 | -5 | 482.91 | 8.10 |
| 0 | 5 | -5 | 473.05 | 7.74 |
| 0 | 5 | -5 | 465.88 | 8.06 |
| 0 | 5 | -5 | 466.00 | 8.33 |
| 0 | 5 | -5 | 514.70 | 7.67 |
| 0 | 5 | -5 | 485.35 | 8.57 |
| 0 | 5 | -5 | 454.29 | 6.94 |
| 0 | 5 | -5 | 486.02 | 8.44 |
| 0 | 5 | -5 | 518.95 | 7.62 |
| 0 | 5 | -5 | 446.22 | 8.23 |
| 0 | 5 | -5 | 459.96 | 8.62 |
| 0 | 5 | -5 | 434.60 | 8.14 |
| 0 | 5 | -5 | 479.54 | 7.13 |
| 0 | 5 | -4 | 557.07 | 8.76 |
| 0 | 5 | -4 | 553.41 | 8.72 |
| 0 | 5 | -4 | 562.99 | 6.94 |
| 0 | 5 | -4 | 587.85 | 8.74 |
| 0 | 5 | -4 | 569.46 | 8.78 |
| 0 | 5 | -4 | 570.64 | 8.85 |
| 0 | 5 | -4 | 567.13 | 7.96 |
| 0 | 5 | -4 | 575.91 | 7.60 |
| 0 | 5 | -4 | 522.99 | 8.53 |



## CIF 31

|   |   |    |        |      |
|---|---|----|--------|------|
| 0 | 5 | -4 | 560.48 | 7.76 |
| 0 | 5 | -4 | 495.77 | 8.66 |
| 0 | 5 | -4 | 558.29 | 7.50 |
| 0 | 5 | -4 | 550.62 | 9.77 |
| 0 | 5 | -4 | 581.26 | 8.27 |
| 0 | 5 | -3 | 450.42 | 6.92 |
| 0 | 5 | -3 | 426.45 | 7.15 |
| 0 | 5 | -3 | 446.93 | 5.91 |
| 0 | 5 | -3 | 430.27 | 6.70 |
| 0 | 5 | -3 | 454.80 | 7.56 |
| 0 | 5 | -3 | 452.82 | 7.65 |
| 0 | 5 | -3 | 437.07 | 7.47 |
| 0 | 5 | -3 | 453.60 | 6.43 |
| 0 | 5 | -3 | 443.23 | 8.52 |
| 0 | 5 | -3 | 482.39 | 6.85 |
| 0 | 5 | -3 | 453.95 | 7.34 |
| 0 | 5 | -3 | 455.86 | 7.62 |
| 0 | 5 | -2 | 540.04 | 7.90 |
| 0 | 5 | -2 | 576.18 | 7.03 |
| 0 | 5 | -2 | 531.48 | 7.63 |
| 0 | 5 | -2 | 575.87 | 8.75 |
| 0 | 5 | -2 | 581.65 | 8.62 |
| 0 | 5 | -2 | 576.03 | 8.68 |
| 0 | 5 | -2 | 613.91 | 7.55 |
| 0 | 5 | -2 | 547.40 | 7.06 |
| 0 | 5 | -2 | 567.22 | 8.46 |
| 0 | 5 | -2 | 550.82 | 9.73 |
| 0 | 5 | -2 | 602.43 | 8.83 |
| 0 | 5 | -2 | 610.67 | 7.45 |
| 0 | 5 | -2 | 580.56 | 7.68 |
| 0 | 5 | -1 | 464.21 | 6.86 |
| 0 | 5 | -1 | 556.84 | 7.33 |
| 0 | 5 | -1 | 527.63 | 7.85 |
| 0 | 5 | -1 | 458.34 | 8.85 |
| 0 | 5 | -1 | 450.32 | 7.82 |
| 0 | 5 | -1 | 490.19 | 7.93 |
| 0 | 5 | -1 | 617.24 | 7.55 |
| 0 | 5 | -1 | 540.78 | 6.90 |
| 0 | 5 | -1 | 498.54 | 6.27 |
| 0 | 5 | -1 | 490.64 | 7.44 |
| 0 | 5 | -1 | 500.02 | 8.22 |

## CIF 31

|   |   |    |         |       |
|---|---|----|---------|-------|
| 0 | 5 | -1 | 505.08  | 6.63  |
| 0 | 5 | 0  | 175.37  | 3.37  |
| 0 | 5 | 0  | 173.34  | 4.26  |
| 0 | 5 | 0  | 179.06  | 3.78  |
| 0 | 5 | 0  | 175.94  | 4.46  |
| 0 | 5 | 0  | 194.37  | 3.87  |
| 0 | 5 | 0  | 178.45  | 4.07  |
| 0 | 5 | 0  | 178.72  | 3.07  |
| 0 | 5 | 0  | 196.19  | 3.77  |
| 0 | 5 | 0  | 173.49  | 3.81  |
| 0 | 5 | 0  | 165.52  | 5.02  |
| 0 | 5 | 0  | 190.50  | 3.75  |
| 0 | 5 | 0  | 162.69  | 4.48  |
| 0 | 5 | 0  | 177.47  | 3.47  |
| 0 | 5 | 1  | 972.07  | 11.10 |
| 0 | 5 | 1  | 902.11  | 9.30  |
| 0 | 5 | 1  | 1034.34 | 11.16 |
| 0 | 5 | 1  | 860.97  | 11.98 |
| 0 | 5 | 1  | 892.91  | 10.99 |
| 0 | 5 | 1  | 986.23  | 11.06 |
| 0 | 5 | 1  | 791.67  | 12.78 |
| 0 | 5 | 1  | 941.69  | 11.78 |
| 0 | 5 | 1  | 829.36  | 12.24 |
| 0 | 5 | 1  | 925.44  | 10.34 |
| 0 | 5 | 2  | 560.05  | 9.14  |
| 0 | 5 | 2  | 598.44  | 8.11  |
| 0 | 5 | 2  | 565.15  | 9.01  |
| 0 | 5 | 2  | 545.94  | 8.29  |
| 0 | 5 | 2  | 521.79  | 9.59  |
| 0 | 5 | 2  | 568.35  | 9.69  |
| 0 | 5 | 2  | 555.93  | 7.95  |
| 0 | 5 | 2  | 575.03  | 7.56  |
| 0 | 5 | 2  | 596.83  | 8.07  |
| 0 | 5 | 3  | 855.62  | 10.71 |
| 0 | 5 | 3  | 838.37  | 10.48 |
| 0 | 5 | 3  | 732.51  | 10.94 |
| 0 | 5 | 3  | 903.50  | 10.81 |
| 0 | 5 | 3  | 641.66  | 11.24 |
| 0 | 5 | 3  | 767.50  | 12.13 |
| 0 | 5 | 3  | 836.60  | 10.02 |
| 0 | 5 | 4  | 867.64  | 11.09 |

## CIF 31

|   |   |     |         |       |
|---|---|-----|---------|-------|
| 0 | 5 | 4   | 873.02  | 11.21 |
| 0 | 5 | 5   | 351.10  | 6.69  |
| 0 | 5 | 5   | 350.86  | 6.79  |
| 0 | 5 | 5   | 315.41  | 7.90  |
| 0 | 5 | 5   | 328.28  | 7.51  |
| 0 | 5 | 5   | 334.39  | 6.22  |
| 0 | 5 | 6   | 3862.21 | 34.82 |
| 0 | 5 | 6   | 3697.30 | 34.27 |
| 0 | 5 | 6   | 3107.56 | 36.00 |
| 0 | 5 | 6   | 3107.28 | 34.49 |
| 0 | 5 | 6   | 3347.42 | 32.92 |
| 0 | 5 | 6   | 3139.99 | 36.45 |
| 0 | 5 | 7   | 1505.66 | 17.74 |
| 0 | 5 | 7   | 1243.90 | 18.59 |
| 0 | 5 | 7   | 1534.60 | 18.16 |
| 0 | 5 | 7   | 1477.30 | 16.99 |
| 0 | 5 | 7   | 1246.65 | 19.18 |
| 0 | 5 | 8   | 0.13    | 0.89  |
| 0 | 5 | 8   | 1.96    | 0.82  |
| 0 | 5 | 8   | 2.11    | 0.79  |
| 0 | 5 | 8   | 2.72    | 1.29  |
| 0 | 5 | 9   | 107.30  | 4.51  |
| 0 | 5 | 9   | 114.94  | 3.90  |
| 0 | 5 | 10  | 5.86    | 1.18  |
| 0 | 5 | 10  | 6.77    | 1.40  |
| 0 | 6 | -15 | 15.77   | 1.05  |
| 0 | 6 | -14 | 46.90   | 2.53  |
| 0 | 6 | -14 | 59.48   | 2.41  |
| 0 | 6 | -13 | 247.93  | 7.48  |
| 0 | 6 | -13 | 246.36  | 5.02  |
| 0 | 6 | -13 | 254.75  | 5.79  |
| 0 | 6 | -12 | 247.20  | 7.94  |
| 0 | 6 | -12 | 244.56  | 7.28  |
| 0 | 6 | -12 | 263.18  | 5.67  |
| 0 | 6 | -12 | 252.08  | 6.22  |
| 0 | 6 | -11 | 578.38  | 12.25 |
| 0 | 6 | -11 | 596.49  | 13.32 |
| 0 | 6 | -11 | 619.29  | 9.61  |
| 0 | 6 | -10 | 403.22  | 9.26  |
| 0 | 6 | -10 | 454.52  | 9.66  |
| 0 | 6 | -10 | 454.88  | 10.62 |

## CIF 31

|   |   |     |         |       |
|---|---|-----|---------|-------|
| 0 | 6 | -10 | 415.41  | 7.66  |
| 0 | 6 | -10 | 398.68  | 9.69  |
| 0 | 6 | -9  | 841.05  | 15.33 |
| 0 | 6 | -9  | 929.86  | 15.60 |
| 0 | 6 | -9  | 824.12  | 11.76 |
| 0 | 6 | -9  | 680.05  | 14.26 |
| 0 | 6 | -9  | 813.93  | 14.27 |
| 0 | 6 | -9  | 862.37  | 14.77 |
| 0 | 6 | -9  | 994.93  | 14.57 |
| 0 | 6 | -9  | 915.58  | 12.88 |
| 0 | 6 | -8  | 860.93  | 15.50 |
| 0 | 6 | -8  | 872.53  | 15.21 |
| 0 | 6 | -8  | 1013.05 | 15.59 |
| 0 | 6 | -8  | 1024.66 | 13.11 |
| 0 | 6 | -8  | 1001.41 | 15.78 |
| 0 | 6 | -8  | 863.51  | 12.95 |
| 0 | 6 | -7  | 11.50   | 1.58  |
| 0 | 6 | -7  | 8.72    | 1.60  |
| 0 | 6 | -7  | 7.36    | 1.26  |
| 0 | 6 | -7  | 7.75    | 1.33  |
| 0 | 6 | -7  | 8.12    | 1.24  |
| 0 | 6 | -7  | 8.43    | 1.62  |
| 0 | 6 | -7  | 6.83    | 1.52  |
| 0 | 6 | -7  | 6.81    | 1.24  |
| 0 | 6 | -7  | 7.32    | 1.12  |
| 0 | 6 | -7  | 8.10    | 1.60  |
| 0 | 6 | -7  | 11.21   | 1.49  |
| 0 | 6 | -7  | 13.30   | 1.82  |
| 0 | 6 | -7  | 6.54    | 1.37  |
| 0 | 6 | -6  | 6.78    | 1.28  |
| 0 | 6 | -6  | 7.03    | 1.34  |
| 0 | 6 | -6  | 6.41    | 1.27  |
| 0 | 6 | -6  | 7.56    | 1.41  |
| 0 | 6 | -6  | 9.18    | 1.36  |
| 0 | 6 | -6  | 11.46   | 1.46  |
| 0 | 6 | -6  | 6.26    | 1.17  |
| 0 | 6 | -6  | 7.42    | 1.20  |
| 0 | 6 | -6  | 5.32    | 1.23  |
| 0 | 6 | -6  | 12.65   | 1.28  |
| 0 | 6 | -6  | 5.41    | 1.04  |
| 0 | 6 | -6  | 9.50    | 1.60  |

## CIF 31

|   |   |    |         |       |
|---|---|----|---------|-------|
| 0 | 6 | -6 | 6.37    | 1.38  |
| 0 | 6 | -6 | 6.41    | 1.14  |
| 0 | 6 | -5 | 2003.60 | 23.28 |
| 0 | 6 | -5 | 2016.51 | 19.89 |
| 0 | 6 | -5 | 2127.57 | 23.70 |
| 0 | 6 | -5 | 1921.87 | 22.00 |
| 0 | 6 | -5 | 2098.93 | 23.46 |
| 0 | 6 | -5 | 2055.40 | 23.62 |
| 0 | 6 | -5 | 2152.37 | 23.17 |
| 0 | 6 | -5 | 2030.05 | 23.29 |
| 0 | 6 | -5 | 1968.23 | 21.78 |
| 0 | 6 | -5 | 1908.56 | 23.48 |
| 0 | 6 | -5 | 2125.02 | 21.27 |
| 0 | 6 | -5 | 2062.22 | 21.73 |
| 0 | 6 | -5 | 2068.68 | 22.29 |
| 0 | 6 | -5 | 2105.83 | 23.66 |
| 0 | 6 | -5 | 2118.86 | 22.11 |
| 0 | 6 | -5 | 2025.10 | 21.28 |
| 0 | 6 | -5 | 2180.93 | 24.01 |
| 0 | 6 | -4 | 89.00   | 3.49  |
| 0 | 6 | -4 | 96.86   | 3.55  |
| 0 | 6 | -4 | 86.79   | 2.47  |
| 0 | 6 | -4 | 88.12   | 3.17  |
| 0 | 6 | -4 | 89.15   | 3.29  |
| 0 | 6 | -4 | 92.42   | 3.67  |
| 0 | 6 | -4 | 94.38   | 3.57  |
| 0 | 6 | -4 | 79.65   | 3.31  |
| 0 | 6 | -4 | 101.10  | 3.64  |
| 0 | 6 | -4 | 79.35   | 3.42  |
| 0 | 6 | -4 | 93.88   | 3.62  |
| 0 | 6 | -4 | 88.43   | 3.08  |
| 0 | 6 | -4 | 86.45   | 2.81  |
| 0 | 6 | -4 | 87.57   | 2.95  |
| 0 | 6 | -4 | 95.58   | 2.98  |
| 0 | 6 | -4 | 89.98   | 3.65  |
| 0 | 6 | -4 | 89.03   | 3.46  |
| 0 | 6 | -4 | 90.88   | 3.30  |
| 0 | 6 | -4 | 85.08   | 2.78  |
| 0 | 6 | -3 | 560.62  | 9.44  |
| 0 | 6 | -3 | 610.00  | 9.30  |
| 0 | 6 | -3 | 575.82  | 7.50  |

## CIF 31

|   |   |    |        |      |
|---|---|----|--------|------|
| 0 | 6 | -3 | 587.43 | 8.62 |
| 0 | 6 | -3 | 571.80 | 9.80 |
| 0 | 6 | -3 | 569.57 | 9.61 |
| 0 | 6 | -3 | 558.08 | 9.55 |
| 0 | 6 | -3 | 555.74 | 9.45 |
| 0 | 6 | -3 | 587.36 | 8.16 |
| 0 | 6 | -3 | 563.72 | 9.12 |
| 0 | 6 | -3 | 563.08 | 9.46 |
| 0 | 6 | -3 | 580.82 | 7.98 |
| 0 | 6 | -3 | 569.76 | 8.95 |
| 0 | 6 | -3 | 554.11 | 8.43 |
| 0 | 6 | -3 | 554.86 | 9.32 |
| 0 | 6 | -2 | 478.67 | 8.26 |
| 0 | 6 | -2 | 445.22 | 8.24 |
| 0 | 6 | -2 | 454.17 | 7.59 |
| 0 | 6 | -2 | 489.90 | 6.75 |
| 0 | 6 | -2 | 480.83 | 7.59 |
| 0 | 6 | -2 | 441.06 | 8.63 |
| 0 | 6 | -2 | 385.14 | 8.02 |
| 0 | 6 | -2 | 462.36 | 8.31 |
| 0 | 6 | -2 | 453.63 | 8.22 |
| 0 | 6 | -2 | 479.75 | 8.49 |
| 0 | 6 | -2 | 486.26 | 7.14 |
| 0 | 6 | -2 | 490.76 | 6.86 |
| 0 | 6 | -2 | 466.41 | 8.28 |
| 0 | 6 | -2 | 476.17 | 8.62 |
| 0 | 6 | -2 | 541.04 | 7.22 |
| 0 | 6 | -2 | 509.08 | 7.64 |
| 0 | 6 | -1 | 31.21  | 2.01 |
| 0 | 6 | -1 | 30.69  | 1.64 |
| 0 | 6 | -1 | 48.76  | 2.16 |
| 0 | 6 | -1 | 35.08  | 2.00 |
| 0 | 6 | -1 | 40.54  | 2.01 |
| 0 | 6 | -1 | 27.76  | 1.85 |
| 0 | 6 | -1 | 31.19  | 2.16 |
| 0 | 6 | -1 | 33.30  | 2.06 |
| 0 | 6 | -1 | 33.85  | 2.14 |
| 0 | 6 | -1 | 41.79  | 1.88 |
| 0 | 6 | -1 | 32.46  | 1.45 |
| 0 | 6 | -1 | 30.02  | 2.21 |
| 0 | 6 | -1 | 36.47  | 1.67 |

CIF 31

|   |   |   |         |       |
|---|---|---|---------|-------|
| 0 | 6 | 0 | 2504.64 | 26.48 |
| 0 | 6 | 0 | 2523.85 | 25.28 |
| 0 | 6 | 0 | 2434.85 | 25.22 |
| 0 | 6 | 0 | 2666.95 | 28.10 |
| 0 | 6 | 0 | 2510.52 | 27.20 |
| 0 | 6 | 0 | 2411.24 | 26.10 |
| 0 | 6 | 0 | 2592.17 | 24.97 |
| 0 | 6 | 0 | 2476.14 | 25.87 |
| 0 | 6 | 0 | 2582.07 | 26.78 |
| 0 | 6 | 0 | 2465.23 | 23.27 |
| 0 | 6 | 0 | 2565.79 | 25.55 |
| 0 | 6 | 0 | 2459.85 | 27.61 |
| 0 | 6 | 0 | 2562.52 | 24.44 |
| 0 | 6 | 1 | 57.26   | 2.62  |
| 0 | 6 | 1 | 67.26   | 2.86  |
| 0 | 6 | 1 | 63.69   | 2.56  |
| 0 | 6 | 1 | 56.82   | 2.42  |
| 0 | 6 | 1 | 58.68   | 2.95  |
| 0 | 6 | 1 | 59.03   | 2.62  |
| 0 | 6 | 1 | 72.10   | 2.71  |
| 0 | 6 | 1 | 69.13   | 2.57  |
| 0 | 6 | 1 | 82.20   | 3.54  |
| 0 | 6 | 1 | 64.01   | 2.49  |
| 0 | 6 | 1 | 49.21   | 2.96  |
| 0 | 6 | 1 | 59.78   | 2.18  |
| 0 | 6 | 2 | 47.70   | 2.23  |
| 0 | 6 | 2 | 47.72   | 2.28  |
| 0 | 6 | 2 | 48.55   | 2.67  |
| 0 | 6 | 2 | 49.93   | 2.78  |
| 0 | 6 | 2 | 50.16   | 2.37  |
| 0 | 6 | 2 | 47.16   | 2.39  |
| 0 | 6 | 2 | 52.27   | 3.06  |
| 0 | 6 | 2 | 48.69   | 2.08  |
| 0 | 6 | 3 | 45.62   | 2.34  |
| 0 | 6 | 3 | 45.12   | 2.62  |
| 0 | 6 | 3 | 43.56   | 2.52  |
| 0 | 6 | 3 | 45.29   | 2.35  |
| 0 | 6 | 3 | 48.73   | 3.25  |
| 0 | 6 | 3 | 47.94   | 2.39  |
| 0 | 6 | 3 | 44.05   | 2.92  |
| 0 | 6 | 3 | 43.69   | 2.02  |

## CIF 31

|   |   |     |        |      |
|---|---|-----|--------|------|
| 0 | 6 | 4   | 136.63 | 4.62 |
| 0 | 6 | 4   | 136.91 | 4.17 |
| 0 | 6 | 4   | 122.56 | 4.07 |
| 0 | 6 | 4   | 129.13 | 4.04 |
| 0 | 6 | 4   | 147.64 | 5.63 |
| 0 | 6 | 4   | 131.14 | 4.10 |
| 0 | 6 | 4   | 127.49 | 4.95 |
| 0 | 6 | 4   | 134.05 | 3.73 |
| 0 | 6 | 5   | 314.14 | 8.38 |
| 0 | 6 | 5   | 365.57 | 7.19 |
| 0 | 6 | 5   | 390.47 | 7.52 |
| 0 | 6 | 5   | 367.66 | 7.31 |
| 0 | 6 | 5   | 283.72 | 7.50 |
| 0 | 6 | 5   | 320.81 | 6.28 |
| 0 | 6 | 5   | 304.19 | 8.47 |
| 0 | 6 | 6   | 254.93 | 6.60 |
| 0 | 6 | 6   | 300.40 | 6.58 |
| 0 | 6 | 6   | 260.29 | 7.50 |
| 0 | 6 | 6   | 297.63 | 6.68 |
| 0 | 6 | 6   | 314.46 | 6.89 |
| 0 | 6 | 6   | 245.12 | 6.60 |
| 0 | 6 | 6   | 288.86 | 5.94 |
| 0 | 6 | 6   | 252.08 | 7.63 |
| 0 | 6 | 7   | 0.05   | 1.01 |
| 0 | 6 | 7   | 2.08   | 0.85 |
| 0 | 6 | 7   | 0.64   | 0.96 |
| 0 | 6 | 7   | 0.06   | 1.04 |
| 0 | 6 | 8   | 226.11 | 5.90 |
| 0 | 6 | 8   | 226.71 | 6.55 |
| 0 | 6 | 9   | 8.91   | 1.46 |
| 0 | 6 | 10  | 30.64  | 1.89 |
| 0 | 7 | -14 | 2.30   | 0.94 |
| 0 | 7 | -14 | 2.00   | 0.71 |
| 0 | 7 | -13 | 168.88 | 5.97 |
| 0 | 7 | -13 | 188.80 | 4.04 |
| 0 | 7 | -12 | 1.19   | 1.26 |
| 0 | 7 | -12 | 2.68   | 0.87 |
| 0 | 7 | -12 | 2.91   | 1.13 |
| 0 | 7 | -11 | 31.88  | 2.52 |
| 0 | 7 | -11 | 35.23  | 2.62 |
| 0 | 7 | -11 | 35.16  | 3.09 |



## CIF 31

|   |   |     |         |       |
|---|---|-----|---------|-------|
| 0 | 7 | -11 | 41.36   | 2.23  |
| 0 | 7 | -11 | 32.95   | 2.59  |
| 0 | 7 | -10 | 518.23  | 12.19 |
| 0 | 7 | -10 | 547.72  | 11.70 |
| 0 | 7 | -10 | 563.17  | 12.26 |
| 0 | 7 | -10 | 575.75  | 9.14  |
| 0 | 7 | -10 | 510.36  | 10.96 |
| 0 | 7 | -10 | 496.17  | 11.28 |
| 0 | 7 | -9  | 108.45  | 5.32  |
| 0 | 7 | -9  | 114.41  | 5.23  |
| 0 | 7 | -9  | 124.56  | 5.29  |
| 0 | 7 | -9  | 126.52  | 4.06  |
| 0 | 7 | -9  | 119.97  | 5.35  |
| 0 | 7 | -8  | 52.78   | 3.61  |
| 0 | 7 | -8  | 55.15   | 3.13  |
| 0 | 7 | -8  | 57.30   | 3.65  |
| 0 | 7 | -8  | 50.91   | 2.56  |
| 0 | 7 | -8  | 53.18   | 3.07  |
| 0 | 7 | -8  | 51.58   | 3.55  |
| 0 | 7 | -8  | 51.81   | 3.63  |
| 0 | 7 | -7  | 1218.76 | 19.45 |
| 0 | 7 | -7  | 1372.16 | 18.66 |
| 0 | 7 | -7  | 1408.51 | 19.52 |
| 0 | 7 | -7  | 1222.81 | 19.11 |
| 0 | 7 | -7  | 1391.49 | 18.58 |
| 0 | 7 | -7  | 1471.35 | 17.82 |
| 0 | 7 | -7  | 1354.81 | 17.71 |
| 0 | 7 | -7  | 1343.14 | 19.50 |
| 0 | 7 | -7  | 1400.91 | 18.65 |
| 0 | 7 | -7  | 1438.60 | 20.01 |
| 0 | 7 | -7  | 1380.18 | 16.40 |
| 0 | 7 | -7  | 1254.36 | 17.12 |
| 0 | 7 | -6  | 44.80   | 2.93  |
| 0 | 7 | -6  | 46.91   | 3.01  |
| 0 | 7 | -6  | 46.87   | 2.63  |
| 0 | 7 | -6  | 57.65   | 3.39  |
| 0 | 7 | -6  | 49.37   | 2.74  |
| 0 | 7 | -6  | 48.42   | 3.05  |
| 0 | 7 | -6  | 47.07   | 2.88  |
| 0 | 7 | -6  | 58.64   | 2.92  |
| 0 | 7 | -6  | 51.58   | 3.06  |

## CIF 31

|   |   |    |        |       |
|---|---|----|--------|-------|
| 0 | 7 | -6 | 43.51  | 3.04  |
| 0 | 7 | -6 | 50.24  | 2.41  |
| 0 | 7 | -6 | 50.09  | 2.64  |
| 0 | 7 | -6 | 50.07  | 3.12  |
| 0 | 7 | -6 | 45.01  | 2.41  |
| 0 | 7 | -5 | 469.30 | 9.36  |
| 0 | 7 | -5 | 431.33 | 9.02  |
| 0 | 7 | -5 | 442.15 | 9.59  |
| 0 | 7 | -5 | 446.88 | 8.34  |
| 0 | 7 | -5 | 479.77 | 9.61  |
| 0 | 7 | -5 | 453.06 | 9.06  |
| 0 | 7 | -5 | 463.72 | 8.75  |
| 0 | 7 | -5 | 450.09 | 9.25  |
| 0 | 7 | -5 | 422.57 | 8.11  |
| 0 | 7 | -5 | 443.13 | 7.59  |
| 0 | 7 | -5 | 463.78 | 8.01  |
| 0 | 7 | -5 | 472.42 | 9.70  |
| 0 | 7 | -5 | 460.72 | 8.57  |
| 0 | 7 | -4 | 15.41  | 1.65  |
| 0 | 7 | -4 | 16.11  | 1.20  |
| 0 | 7 | -4 | 17.67  | 1.66  |
| 0 | 7 | -4 | 16.83  | 1.89  |
| 0 | 7 | -4 | 15.94  | 1.74  |
| 0 | 7 | -4 | 17.14  | 1.79  |
| 0 | 7 | -4 | 14.86  | 1.82  |
| 0 | 7 | -4 | 25.18  | 2.24  |
| 0 | 7 | -4 | 17.45  | 1.62  |
| 0 | 7 | -4 | 22.39  | 1.59  |
| 0 | 7 | -4 | 14.53  | 1.93  |
| 0 | 7 | -4 | 15.24  | 1.49  |
| 0 | 7 | -4 | 15.09  | 1.42  |
| 0 | 7 | -4 | 15.75  | 1.86  |
| 0 | 7 | -4 | 18.58  | 1.79  |
| 0 | 7 | -3 | 934.19 | 13.85 |
| 0 | 7 | -3 | 857.28 | 12.69 |
| 0 | 7 | -3 | 851.99 | 10.80 |
| 0 | 7 | -3 | 981.54 | 14.23 |
| 0 | 7 | -3 | 925.04 | 12.49 |
| 0 | 7 | -3 | 908.90 | 14.28 |
| 0 | 7 | -3 | 944.51 | 14.77 |
| 0 | 7 | -3 | 923.84 | 14.00 |

## CIF 31

|   |   |    |        |       |
|---|---|----|--------|-------|
| 0 | 7 | -3 | 936.65 | 13.86 |
| 0 | 7 | -3 | 943.13 | 14.08 |
| 0 | 7 | -3 | 936.91 | 11.91 |
| 0 | 7 | -3 | 927.07 | 13.17 |
| 0 | 7 | -3 | 855.26 | 11.31 |
| 0 | 7 | -3 | 885.51 | 13.57 |
| 0 | 7 | -3 | 973.39 | 12.69 |
| 0 | 7 | -3 | 922.70 | 13.84 |
| 0 | 7 | -3 | 841.68 | 12.64 |
| 0 | 7 | -3 | 851.81 | 11.89 |
| 0 | 7 | -2 | 6.47   | 1.28  |
| 0 | 7 | -2 | 6.85   | 1.07  |
| 0 | 7 | -2 | 8.62   | 1.01  |
| 0 | 7 | -2 | 8.61   | 1.24  |
| 0 | 7 | -2 | 21.31  | 1.95  |
| 0 | 7 | -2 | 7.11   | 1.29  |
| 0 | 7 | -2 | 9.21   | 1.47  |
| 0 | 7 | -2 | 10.50  | 1.23  |
| 0 | 7 | -2 | 6.14   | 1.24  |
| 0 | 7 | -2 | 22.09  | 1.40  |
| 0 | 7 | -2 | 8.32   | 1.25  |
| 0 | 7 | -2 | 7.79   | 1.58  |
| 0 | 7 | -2 | 8.53   | 0.99  |
| 0 | 7 | -2 | 9.83   | 1.33  |
| 0 | 7 | -2 | 6.70   | 1.17  |
| 0 | 7 | -1 | 52.88  | 2.89  |
| 0 | 7 | -1 | 52.78  | 3.17  |
| 0 | 7 | -1 | 49.85  | 2.17  |
| 0 | 7 | -1 | 53.44  | 2.51  |
| 0 | 7 | -1 | 49.91  | 3.19  |
| 0 | 7 | -1 | 54.27  | 3.10  |
| 0 | 7 | -1 | 53.67  | 2.86  |
| 0 | 7 | -1 | 50.34  | 2.74  |
| 0 | 7 | -1 | 53.07  | 2.96  |
| 0 | 7 | -1 | 56.08  | 3.19  |
| 0 | 7 | -1 | 54.98  | 2.38  |
| 0 | 7 | -1 | 49.33  | 1.95  |
| 0 | 7 | -1 | 47.66  | 2.53  |
| 0 | 7 | -1 | 53.40  | 3.23  |
| 0 | 7 | -1 | 52.60  | 2.21  |
| 0 | 7 | -1 | 55.14  | 2.59  |

## CIF 31

|   |   |   |         |       |
|---|---|---|---------|-------|
| 0 | 7 | 0 | 2153.66 | 24.98 |
| 0 | 7 | 0 | 2169.95 | 26.39 |
| 0 | 7 | 0 | 2279.75 | 24.15 |
| 0 | 7 | 0 | 2455.84 | 24.49 |
| 0 | 7 | 0 | 2263.05 | 26.76 |
| 0 | 7 | 0 | 2247.88 | 26.15 |
| 0 | 7 | 0 | 2207.28 | 24.84 |
| 0 | 7 | 0 | 2251.28 | 24.74 |
| 0 | 7 | 0 | 2190.03 | 25.33 |
| 0 | 7 | 0 | 2357.72 | 23.75 |
| 0 | 7 | 0 | 2189.39 | 26.86 |
| 0 | 7 | 0 | 2167.52 | 26.66 |
| 0 | 7 | 0 | 2174.67 | 22.59 |
| 0 | 7 | 1 | 86.33   | 3.53  |
| 0 | 7 | 1 | 109.92  | 3.72  |
| 0 | 7 | 1 | 83.97   | 4.02  |
| 0 | 7 | 1 | 110.76  | 3.73  |
| 0 | 7 | 1 | 89.79   | 4.17  |
| 0 | 7 | 1 | 92.12   | 4.03  |
| 0 | 7 | 1 | 89.07   | 3.48  |
| 0 | 7 | 1 | 96.38   | 3.77  |
| 0 | 7 | 1 | 102.32  | 3.50  |
| 0 | 7 | 1 | 101.03  | 3.11  |
| 0 | 7 | 1 | 96.01   | 4.50  |
| 0 | 7 | 2 | 2217.26 | 23.86 |
| 0 | 7 | 2 | 2128.89 | 25.82 |
| 0 | 7 | 2 | 1964.44 | 24.74 |
| 0 | 7 | 2 | 2387.96 | 24.56 |
| 0 | 7 | 2 | 2212.98 | 23.61 |
| 0 | 7 | 2 | 2169.54 | 26.04 |
| 0 | 7 | 2 | 2189.59 | 23.49 |
| 0 | 7 | 2 | 2256.63 | 27.24 |
| 0 | 7 | 2 | 2077.09 | 22.18 |
| 0 | 7 | 3 | 103.56  | 3.77  |
| 0 | 7 | 3 | 83.26   | 3.96  |
| 0 | 7 | 3 | 80.78   | 3.76  |
| 0 | 7 | 3 | 82.24   | 3.68  |
| 0 | 7 | 3 | 103.55  | 3.76  |
| 0 | 7 | 3 | 82.35   | 4.47  |
| 0 | 7 | 3 | 101.71  | 3.72  |
| 0 | 7 | 3 | 95.77   | 3.61  |

## CIF 31

|   |   |     |         |       |
|---|---|-----|---------|-------|
| 0 | 7 | 3   | 90.84   | 4.48  |
| 0 | 7 | 3   | 89.86   | 3.06  |
| 0 | 7 | 3   | 87.32   | 4.52  |
| 0 | 7 | 4   | 1147.19 | 15.33 |
| 0 | 7 | 4   | 1058.69 | 15.74 |
| 0 | 7 | 4   | 1189.83 | 15.39 |
| 0 | 7 | 4   | 1267.72 | 15.88 |
| 0 | 7 | 4   | 1070.15 | 17.61 |
| 0 | 7 | 4   | 1000.16 | 16.71 |
| 0 | 7 | 4   | 1143.27 | 15.33 |
| 0 | 7 | 5   | 133.33  | 4.32  |
| 0 | 7 | 5   | 115.49  | 5.21  |
| 0 | 7 | 5   | 127.45  | 4.33  |
| 0 | 7 | 5   | 112.04  | 4.67  |
| 0 | 7 | 5   | 121.65  | 5.44  |
| 0 | 7 | 6   | 101.51  | 4.57  |
| 0 | 7 | 6   | 103.16  | 4.03  |
| 0 | 7 | 6   | 131.70  | 4.28  |
| 0 | 7 | 6   | 127.65  | 4.34  |
| 0 | 7 | 6   | 100.53  | 3.84  |
| 0 | 7 | 6   | 101.23  | 4.56  |
| 0 | 7 | 6   | 132.04  | 4.31  |
| 0 | 7 | 6   | 101.05  | 4.08  |
| 0 | 7 | 6   | 100.59  | 4.83  |
| 0 | 7 | 7   | 48.06   | 2.95  |
| 0 | 7 | 7   | 60.09   | 2.76  |
| 0 | 7 | 7   | 50.26   | 3.01  |
| 0 | 7 | 7   | 64.62   | 2.90  |
| 0 | 7 | 7   | 52.60   | 3.24  |
| 0 | 7 | 8   | 33.33   | 2.00  |
| 0 | 7 | 8   | 40.17   | 2.65  |
| 0 | 7 | 8   | 38.26   | 2.32  |
| 0 | 7 | 8   | 40.48   | 2.50  |
| 0 | 7 | 9   | 364.22  | 6.88  |
| 0 | 7 | 9   | 331.27  | 6.54  |
| 0 | 7 | 10  | 19.69   | 1.22  |
| 0 | 8 | -14 | 0.68    | 0.55  |
| 0 | 8 | -13 | 76.19   | 2.21  |
| 0 | 8 | -13 | 67.70   | 2.59  |
| 0 | 8 | -12 | 51.14   | 3.05  |
| 0 | 8 | -12 | 48.58   | 2.13  |

## CIF 31

|   |   |     |        |       |
|---|---|-----|--------|-------|
| 0 | 8 | -11 | 207.72 | 6.51  |
| 0 | 8 | -11 | 210.88 | 6.23  |
| 0 | 8 | -11 | 216.66 | 6.25  |
| 0 | 8 | -11 | 216.28 | 7.02  |
| 0 | 8 | -11 | 231.13 | 5.09  |
| 0 | 8 | -11 | 188.06 | 6.81  |
| 0 | 8 | -11 | 188.35 | 6.04  |
| 0 | 8 | -10 | 299.49 | 8.46  |
| 0 | 8 | -10 | 326.39 | 9.23  |
| 0 | 8 | -10 | 303.94 | 8.29  |
| 0 | 8 | -10 | 300.61 | 8.50  |
| 0 | 8 | -9  | 170.75 | 6.37  |
| 0 | 8 | -9  | 166.12 | 5.53  |
| 0 | 8 | -9  | 165.32 | 6.43  |
| 0 | 8 | -9  | 174.80 | 6.53  |
| 0 | 8 | -9  | 154.84 | 6.01  |
| 0 | 8 | -9  | 163.45 | 6.36  |
| 0 | 8 | -8  | 44.54  | 3.48  |
| 0 | 8 | -8  | 47.85  | 3.11  |
| 0 | 8 | -8  | 45.90  | 3.03  |
| 0 | 8 | -8  | 45.32  | 3.45  |
| 0 | 8 | -8  | 57.68  | 3.73  |
| 0 | 8 | -8  | 49.34  | 3.55  |
| 0 | 8 | -8  | 46.97  | 2.90  |
| 0 | 8 | -7  | 518.52 | 10.69 |
| 0 | 8 | -7  | 526.25 | 11.20 |
| 0 | 8 | -7  | 518.01 | 9.67  |
| 0 | 8 | -7  | 521.78 | 10.82 |
| 0 | 8 | -7  | 497.06 | 10.06 |
| 0 | 8 | -7  | 520.64 | 11.21 |
| 0 | 8 | -7  | 506.68 | 11.45 |
| 0 | 8 | -7  | 511.74 | 9.82  |
| 0 | 8 | -6  | 345.42 | 7.53  |
| 0 | 8 | -6  | 372.32 | 8.98  |
| 0 | 8 | -6  | 371.48 | 8.15  |
| 0 | 8 | -6  | 374.57 | 8.94  |
| 0 | 8 | -6  | 363.21 | 7.97  |
| 0 | 8 | -6  | 381.60 | 9.10  |
| 0 | 8 | -6  | 383.64 | 8.73  |
| 0 | 8 | -6  | 366.67 | 7.89  |
| 0 | 8 | -6  | 373.37 | 9.02  |

## CIF 31

|   |   |    |        |       |
|---|---|----|--------|-------|
| 0 | 8 | -6 | 378.54 | 9.20  |
| 0 | 8 | -6 | 360.13 | 7.11  |
| 0 | 8 | -6 | 387.03 | 9.48  |
| 0 | 8 | -6 | 356.38 | 7.65  |
| 0 | 8 | -5 | 370.21 | 9.17  |
| 0 | 8 | -5 | 365.47 | 9.04  |
| 0 | 8 | -5 | 358.95 | 7.78  |
| 0 | 8 | -5 | 376.81 | 8.75  |
| 0 | 8 | -5 | 362.61 | 8.29  |
| 0 | 8 | -5 | 362.19 | 8.59  |
| 0 | 8 | -5 | 349.46 | 8.96  |
| 0 | 8 | -5 | 353.80 | 7.01  |
| 0 | 8 | -5 | 367.69 | 9.06  |
| 0 | 8 | -5 | 356.14 | 8.02  |
| 0 | 8 | -4 | 658.17 | 12.90 |
| 0 | 8 | -4 | 687.53 | 12.50 |
| 0 | 8 | -4 | 609.75 | 10.76 |
| 0 | 8 | -4 | 696.03 | 12.94 |
| 0 | 8 | -4 | 725.48 | 12.71 |
| 0 | 8 | -4 | 656.55 | 11.59 |
| 0 | 8 | -4 | 682.58 | 12.65 |
| 0 | 8 | -4 | 727.46 | 11.29 |
| 0 | 8 | -4 | 728.86 | 12.36 |
| 0 | 8 | -4 | 673.44 | 11.04 |
| 0 | 8 | -4 | 660.11 | 10.09 |
| 0 | 8 | -4 | 674.13 | 12.44 |
| 0 | 8 | -4 | 669.95 | 11.96 |
| 0 | 8 | -3 | 220.46 | 5.87  |
| 0 | 8 | -3 | 240.41 | 6.81  |
| 0 | 8 | -3 | 238.76 | 7.25  |
| 0 | 8 | -3 | 253.32 | 7.54  |
| 0 | 8 | -3 | 224.38 | 6.92  |
| 0 | 8 | -3 | 238.35 | 6.72  |
| 0 | 8 | -3 | 232.12 | 6.82  |
| 0 | 8 | -3 | 211.33 | 6.52  |
| 0 | 8 | -3 | 220.21 | 5.30  |
| 0 | 8 | -3 | 228.00 | 6.31  |
| 0 | 8 | -3 | 220.30 | 5.02  |
| 0 | 8 | -3 | 214.55 | 5.70  |
| 0 | 8 | -3 | 219.50 | 6.47  |
| 0 | 8 | -3 | 239.41 | 6.94  |

## CIF 31

|   |   |    |        |       |
|---|---|----|--------|-------|
| 0 | 8 | -2 | 5.07   | 1.41  |
| 0 | 8 | -2 | 4.96   | 0.90  |
| 0 | 8 | -2 | 5.42   | 1.26  |
| 0 | 8 | -2 | 3.09   | 1.70  |
| 0 | 8 | -2 | 5.53   | 1.21  |
| 0 | 8 | -2 | 4.05   | 1.27  |
| 0 | 8 | -2 | 9.39   | 1.52  |
| 0 | 8 | -2 | 3.77   | 1.32  |
| 0 | 8 | -2 | 4.58   | 1.07  |
| 0 | 8 | -2 | 7.19   | 1.22  |
| 0 | 8 | -2 | 3.49   | 1.40  |
| 0 | 8 | -2 | 2.82   | 1.12  |
| 0 | 8 | -1 | 4.94   | 1.31  |
| 0 | 8 | -1 | 6.76   | 1.06  |
| 0 | 8 | -1 | 6.37   | 1.19  |
| 0 | 8 | -1 | 7.86   | 1.74  |
| 0 | 8 | -1 | 7.04   | 1.74  |
| 0 | 8 | -1 | 7.87   | 1.70  |
| 0 | 8 | -1 | 4.96   | 1.27  |
| 0 | 8 | -1 | 5.25   | 1.24  |
| 0 | 8 | -1 | 6.14   | 1.08  |
| 0 | 8 | -1 | 6.14   | 1.61  |
| 0 | 8 | -1 | 6.76   | 0.97  |
| 0 | 8 | -1 | 6.55   | 1.67  |
| 0 | 8 | -1 | 8.82   | 1.37  |
| 0 | 8 | -1 | 4.61   | 1.35  |
| 0 | 8 | 0  | 30.52  | 2.40  |
| 0 | 8 | 0  | 35.65  | 2.06  |
| 0 | 8 | 0  | 36.36  | 2.33  |
| 0 | 8 | 0  | 26.42  | 2.58  |
| 0 | 8 | 0  | 27.46  | 2.49  |
| 0 | 8 | 0  | 25.02  | 2.05  |
| 0 | 8 | 0  | 26.06  | 2.58  |
| 0 | 8 | 0  | 27.11  | 2.60  |
| 0 | 8 | 0  | 34.84  | 2.21  |
| 0 | 8 | 0  | 28.42  | 2.75  |
| 0 | 8 | 0  | 28.65  | 2.55  |
| 0 | 8 | 0  | 38.87  | 2.42  |
| 0 | 8 | 1  | 821.29 | 13.05 |
| 0 | 8 | 1  | 977.49 | 13.67 |
| 0 | 8 | 1  | 958.76 | 13.55 |



## CIF 31

|   |   |   |        |       |
|---|---|---|--------|-------|
| 0 | 8 | 1 | 890.50 | 15.18 |
| 0 | 8 | 1 | 859.18 | 14.95 |
| 0 | 8 | 1 | 933.73 | 14.84 |
| 0 | 8 | 1 | 910.85 | 12.83 |
| 0 | 8 | 1 | 900.83 | 15.79 |
| 0 | 8 | 1 | 834.14 | 14.79 |
| 0 | 8 | 2 | 157.57 | 4.95  |
| 0 | 8 | 2 | 138.66 | 4.54  |
| 0 | 8 | 2 | 118.12 | 4.96  |
| 0 | 8 | 2 | 119.49 | 4.97  |
| 0 | 8 | 2 | 128.79 | 4.86  |
| 0 | 8 | 2 | 114.85 | 5.37  |
| 0 | 8 | 2 | 140.59 | 4.38  |
| 0 | 8 | 2 | 124.64 | 5.43  |
| 0 | 8 | 2 | 117.74 | 5.16  |
| 0 | 8 | 3 | 253.37 | 6.44  |
| 0 | 8 | 3 | 234.89 | 6.02  |
| 0 | 8 | 3 | 220.69 | 6.33  |
| 0 | 8 | 3 | 231.02 | 6.39  |
| 0 | 8 | 3 | 224.42 | 6.62  |
| 0 | 8 | 3 | 259.81 | 6.16  |
| 0 | 8 | 3 | 240.57 | 7.37  |
| 0 | 8 | 3 | 223.34 | 7.32  |
| 0 | 8 | 4 | 12.62  | 1.46  |
| 0 | 8 | 4 | 13.70  | 1.65  |
| 0 | 8 | 4 | 9.82   | 1.42  |
| 0 | 8 | 4 | 9.76   | 1.65  |
| 0 | 8 | 4 | 12.71  | 2.02  |
| 0 | 8 | 4 | 12.41  | 1.51  |
| 0 | 8 | 4 | 11.03  | 1.75  |
| 0 | 8 | 4 | 10.94  | 1.97  |
| 0 | 8 | 5 | 1.56   | 1.01  |
| 0 | 8 | 5 | 2.02   | 1.24  |
| 0 | 8 | 5 | 1.06   | 1.08  |
| 0 | 8 | 5 | 2.92   | 0.90  |
| 0 | 8 | 5 | 3.07   | 0.93  |
| 0 | 8 | 5 | 2.66   | 1.30  |
| 0 | 8 | 5 | 3.85   | 0.99  |
| 0 | 8 | 5 | 1.95   | 1.04  |
| 0 | 8 | 6 | 58.63  | 3.21  |
| 0 | 8 | 6 | 61.38  | 3.33  |

## CIF 31

|   |   |     |        |      |
|---|---|-----|--------|------|
| 0 | 8 | 6   | 60.30  | 3.42 |
| 0 | 8 | 7   | 55.96  | 2.67 |
| 0 | 8 | 7   | 59.16  | 3.13 |
| 0 | 8 | 7   | 59.52  | 2.89 |
| 0 | 8 | 7   | 57.15  | 2.91 |
| 0 | 8 | 8   | 74.92  | 2.86 |
| 0 | 8 | 8   | 72.55  | 2.83 |
| 0 | 9 | -13 | 105.81 | 3.19 |
| 0 | 9 | -13 | 71.78  | 1.64 |
| 0 | 9 | -12 | 29.72  | 2.38 |
| 0 | 9 | -12 | 33.83  | 2.21 |
| 0 | 9 | -12 | 32.37  | 1.53 |
| 0 | 9 | -11 | 4.60   | 1.26 |
| 0 | 9 | -11 | 4.16   | 1.43 |
| 0 | 9 | -11 | 3.27   | 1.20 |
| 0 | 9 | -11 | 2.35   | 1.09 |
| 0 | 9 | -11 | 2.47   | 0.78 |
| 0 | 9 | -11 | 2.63   | 1.05 |
| 0 | 9 | -10 | 35.80  | 2.94 |
| 0 | 9 | -10 | 38.96  | 2.88 |
| 0 | 9 | -10 | 38.12  | 2.90 |
| 0 | 9 | -10 | 38.51  | 3.06 |
| 0 | 9 | -9  | 277.10 | 7.91 |
| 0 | 9 | -9  | 264.90 | 7.49 |
| 0 | 9 | -9  | 270.15 | 6.77 |
| 0 | 9 | -9  | 260.82 | 7.83 |
| 0 | 9 | -9  | 250.49 | 7.64 |
| 0 | 9 | -8  | 140.63 | 5.57 |
| 0 | 9 | -8  | 150.65 | 5.41 |
| 0 | 9 | -8  | 158.60 | 5.58 |
| 0 | 9 | -8  | 122.44 | 5.23 |
| 0 | 9 | -8  | 141.46 | 5.78 |
| 0 | 9 | -8  | 144.95 | 5.89 |
| 0 | 9 | -8  | 130.40 | 4.72 |
| 0 | 9 | -8  | 122.26 | 5.54 |
| 0 | 9 | -7  | 231.85 | 6.94 |
| 0 | 9 | -7  | 242.33 | 6.38 |
| 0 | 9 | -7  | 246.83 | 7.43 |
| 0 | 9 | -7  | 261.17 | 7.51 |
| 0 | 9 | -7  | 234.96 | 7.32 |
| 0 | 9 | -7  | 238.12 | 6.20 |

## CIF 31

|   |   |    |        |      |
|---|---|----|--------|------|
| 0 | 9 | -7 | 242.54 | 6.28 |
| 0 | 9 | -7 | 236.32 | 7.53 |
| 0 | 9 | -6 | 278.03 | 7.79 |
| 0 | 9 | -6 | 291.95 | 8.22 |
| 0 | 9 | -6 | 289.61 | 8.18 |
| 0 | 9 | -6 | 302.66 | 7.24 |
| 0 | 9 | -6 | 288.06 | 7.78 |
| 0 | 9 | -6 | 279.17 | 7.76 |
| 0 | 9 | -6 | 292.51 | 8.48 |
| 0 | 9 | -6 | 290.58 | 7.30 |
| 0 | 9 | -6 | 274.81 | 8.13 |
| 0 | 9 | -5 | 215.69 | 7.19 |
| 0 | 9 | -5 | 211.96 | 6.81 |
| 0 | 9 | -5 | 205.35 | 6.35 |
| 0 | 9 | -5 | 210.37 | 6.01 |
| 0 | 9 | -5 | 209.14 | 6.36 |
| 0 | 9 | -5 | 214.77 | 6.03 |
| 0 | 9 | -5 | 221.35 | 7.34 |
| 0 | 9 | -5 | 199.78 | 6.75 |
| 0 | 9 | -5 | 206.88 | 6.91 |
| 0 | 9 | -5 | 193.15 | 5.30 |
| 0 | 9 | -5 | 211.47 | 6.27 |
| 0 | 9 | -4 | 65.07  | 3.82 |
| 0 | 9 | -4 | 75.42  | 3.95 |
| 0 | 9 | -4 | 70.10  | 3.36 |
| 0 | 9 | -4 | 80.36  | 4.43 |
| 0 | 9 | -4 | 70.68  | 4.28 |
| 0 | 9 | -4 | 60.09  | 3.89 |
| 0 | 9 | -4 | 70.91  | 3.46 |
| 0 | 9 | -4 | 69.89  | 3.98 |
| 0 | 9 | -4 | 63.98  | 2.93 |
| 0 | 9 | -4 | 59.43  | 3.15 |
| 0 | 9 | -4 | 56.68  | 3.53 |
| 0 | 9 | -4 | 69.44  | 3.81 |
| 0 | 9 | -3 | 6.50   | 1.61 |
| 0 | 9 | -3 | 5.83   | 1.62 |
| 0 | 9 | -3 | 5.16   | 1.36 |
| 0 | 9 | -3 | 6.15   | 1.90 |
| 0 | 9 | -3 | 6.70   | 1.29 |
| 0 | 9 | -3 | 7.11   | 1.58 |
| 0 | 9 | -3 | 6.32   | 1.16 |

## CIF 31

|   |   |    |         |       |
|---|---|----|---------|-------|
| 0 | 9 | -3 | 5.19    | 1.34  |
| 0 | 9 | -3 | 5.10    | 1.29  |
| 0 | 9 | -3 | 7.73    | 1.37  |
| 0 | 9 | -3 | 6.90    | 1.62  |
| 0 | 9 | -2 | 1594.82 | 21.19 |
| 0 | 9 | -2 | 1574.19 | 22.00 |
| 0 | 9 | -2 | 1557.16 | 20.93 |
| 0 | 9 | -2 | 1664.92 | 20.09 |
| 0 | 9 | -2 | 1479.92 | 20.58 |
| 0 | 9 | -2 | 1614.46 | 22.85 |
| 0 | 9 | -2 | 1587.18 | 22.18 |
| 0 | 9 | -2 | 1580.33 | 18.75 |
| 0 | 9 | -2 | 1604.32 | 19.76 |
| 0 | 9 | -2 | 1527.42 | 21.04 |
| 0 | 9 | -2 | 1571.59 | 22.09 |
| 0 | 9 | -2 | 1431.19 | 19.34 |
| 0 | 9 | -1 | 384.78  | 8.73  |
| 0 | 9 | -1 | 410.98  | 10.04 |
| 0 | 9 | -1 | 385.26  | 8.22  |
| 0 | 9 | -1 | 429.48  | 10.33 |
| 0 | 9 | -1 | 401.33  | 9.80  |
| 0 | 9 | -1 | 418.35  | 10.05 |
| 0 | 9 | -1 | 385.02  | 8.57  |
| 0 | 9 | -1 | 411.71  | 7.89  |
| 0 | 9 | -1 | 388.80  | 9.47  |
| 0 | 9 | -1 | 417.48  | 8.47  |
| 0 | 9 | -1 | 411.87  | 10.03 |
| 0 | 9 | -1 | 376.35  | 8.69  |
| 0 | 9 | 0  | 41.95   | 2.73  |
| 0 | 9 | 0  | 44.54   | 2.31  |
| 0 | 9 | 0  | 47.48   | 2.75  |
| 0 | 9 | 0  | 42.55   | 3.31  |
| 0 | 9 | 0  | 46.90   | 3.46  |
| 0 | 9 | 0  | 43.30   | 3.12  |
| 0 | 9 | 0  | 48.99   | 2.64  |
| 0 | 9 | 0  | 42.35   | 3.24  |
| 0 | 9 | 0  | 46.84   | 3.50  |
| 0 | 9 | 0  | 45.96   | 2.73  |
| 0 | 9 | 0  | 45.26   | 3.09  |
| 0 | 9 | 1  | 30.60   | 2.78  |
| 0 | 9 | 1  | 28.78   | 1.94  |

## CIF 31

|   |   |   |        |       |
|---|---|---|--------|-------|
| 0 | 9 | 1 | 28.00  | 2.18  |
| 0 | 9 | 1 | 30.28  | 2.58  |
| 0 | 9 | 1 | 27.60  | 2.63  |
| 0 | 9 | 1 | 28.67  | 2.75  |
| 0 | 9 | 1 | 28.99  | 2.09  |
| 0 | 9 | 1 | 27.09  | 2.79  |
| 0 | 9 | 1 | 25.06  | 2.65  |
| 0 | 9 | 1 | 29.09  | 2.20  |
| 0 | 9 | 1 | 26.64  | 2.60  |
| 0 | 9 | 2 | 358.48 | 7.00  |
| 0 | 9 | 2 | 356.48 | 9.19  |
| 0 | 9 | 2 | 346.36 | 7.41  |
| 0 | 9 | 2 | 347.05 | 8.45  |
| 0 | 9 | 2 | 325.32 | 8.05  |
| 0 | 9 | 2 | 333.72 | 7.79  |
| 0 | 9 | 2 | 354.60 | 8.86  |
| 0 | 9 | 2 | 340.02 | 8.93  |
| 0 | 9 | 2 | 353.85 | 7.30  |
| 0 | 9 | 2 | 337.42 | 8.90  |
| 0 | 9 | 2 | 324.52 | 8.51  |
| 0 | 9 | 2 | 383.78 | 7.85  |
| 0 | 9 | 3 | 790.67 | 12.03 |
| 0 | 9 | 3 | 807.37 | 11.41 |
| 0 | 9 | 3 | 846.06 | 12.05 |
| 0 | 9 | 3 | 739.09 | 12.30 |
| 0 | 9 | 3 | 802.17 | 13.22 |
| 0 | 9 | 3 | 788.39 | 11.54 |
| 0 | 9 | 3 | 712.03 | 13.12 |
| 0 | 9 | 3 | 714.48 | 13.31 |
| 0 | 9 | 4 | 5.72   | 1.58  |
| 0 | 9 | 4 | 5.61   | 1.41  |
| 0 | 9 | 4 | 3.97   | 1.15  |
| 0 | 9 | 4 | 4.92   | 1.36  |
| 0 | 9 | 4 | 6.25   | 1.30  |
| 0 | 9 | 4 | 4.59   | 1.40  |
| 0 | 9 | 5 | 176.70 | 4.45  |
| 0 | 9 | 5 | 180.91 | 5.38  |
| 0 | 9 | 5 | 167.80 | 4.55  |
| 0 | 9 | 5 | 164.07 | 5.34  |
| 0 | 9 | 5 | 169.52 | 5.32  |
| 0 | 9 | 6 | 20.23  | 1.82  |

## CIF 31

|   |    |     |        |      |
|---|----|-----|--------|------|
| 0 | 9  | 6   | 21.88  | 1.71 |
| 0 | 9  | 6   | 22.12  | 1.81 |
| 0 | 9  | 7   | 25.97  | 1.39 |
| 0 | 10 | -12 | 4.48   | 0.81 |
| 0 | 10 | -12 | 4.48   | 0.49 |
| 0 | 10 | -12 | 6.46   | 0.82 |
| 0 | 10 | -11 | 1.49   | 0.88 |
| 0 | 10 | -11 | 3.26   | 1.04 |
| 0 | 10 | -11 | 3.34   | 0.98 |
| 0 | 10 | -11 | 3.49   | 0.67 |
| 0 | 10 | -10 | 75.25  | 3.42 |
| 0 | 10 | -10 | 78.12  | 3.35 |
| 0 | 10 | -10 | 97.25  | 4.12 |
| 0 | 10 | -10 | 91.70  | 3.96 |
| 0 | 10 | -10 | 93.51  | 2.83 |
| 0 | 10 | -10 | 80.88  | 3.69 |
| 0 | 10 | -9  | 362.17 | 7.95 |
| 0 | 10 | -9  | 403.80 | 8.36 |
| 0 | 10 | -9  | 401.82 | 7.83 |
| 0 | 10 | -9  | 382.59 | 8.74 |
| 0 | 10 | -9  | 383.74 | 6.77 |
| 0 | 10 | -9  | 407.59 | 9.18 |
| 0 | 10 | -8  | 214.11 | 6.13 |
| 0 | 10 | -8  | 215.20 | 6.21 |
| 0 | 10 | -8  | 208.35 | 6.33 |
| 0 | 10 | -7  | 265.30 | 7.29 |
| 0 | 10 | -7  | 263.19 | 7.44 |
| 0 | 10 | -7  | 253.56 | 7.59 |
| 0 | 10 | -7  | 243.44 | 6.86 |
| 0 | 10 | -7  | 245.27 | 7.36 |
| 0 | 10 | -6  | 71.94  | 3.99 |
| 0 | 10 | -6  | 66.78  | 3.95 |
| 0 | 10 | -6  | 59.84  | 3.29 |
| 0 | 10 | -6  | 71.26  | 3.34 |
| 0 | 10 | -6  | 66.66  | 3.38 |
| 0 | 10 | -6  | 63.22  | 3.83 |
| 0 | 10 | -6  | 57.28  | 3.61 |
| 0 | 10 | -5  | 20.51  | 1.92 |
| 0 | 10 | -5  | 19.74  | 2.11 |
| 0 | 10 | -5  | 18.97  | 2.47 |
| 0 | 10 | -5  | 16.82  | 2.51 |

## CIF 31

|   |    |    |        |       |
|---|----|----|--------|-------|
| 0 | 10 | -5 | 18.38  | 2.24  |
| 0 | 10 | -5 | 21.05  | 1.95  |
| 0 | 10 | -5 | 16.68  | 2.15  |
| 0 | 10 | -5 | 18.02  | 2.10  |
| 0 | 10 | -5 | 17.50  | 1.88  |
| 0 | 10 | -4 | 34.63  | 2.90  |
| 0 | 10 | -4 | 34.47  | 2.42  |
| 0 | 10 | -4 | 32.06  | 3.05  |
| 0 | 10 | -4 | 34.56  | 3.20  |
| 0 | 10 | -4 | 38.38  | 3.00  |
| 0 | 10 | -4 | 38.44  | 2.92  |
| 0 | 10 | -4 | 32.21  | 2.70  |
| 0 | 10 | -4 | 42.75  | 2.64  |
| 0 | 10 | -4 | 33.40  | 2.57  |
| 0 | 10 | -4 | 35.25  | 2.69  |
| 0 | 10 | -3 | 111.27 | 4.77  |
| 0 | 10 | -3 | 118.44 | 4.45  |
| 0 | 10 | -3 | 117.48 | 4.29  |
| 0 | 10 | -3 | 125.89 | 4.50  |
| 0 | 10 | -3 | 114.74 | 4.97  |
| 0 | 10 | -3 | 105.60 | 4.56  |
| 0 | 10 | -3 | 113.04 | 4.44  |
| 0 | 10 | -3 | 118.52 | 4.99  |
| 0 | 10 | -2 | 1.54   | 1.19  |
| 0 | 10 | -2 | 1.25   | 0.90  |
| 0 | 10 | -2 | 0.05   | 1.13  |
| 0 | 10 | -2 | 1.50   | 1.65  |
| 0 | 10 | -2 | 2.79   | 1.01  |
| 0 | 10 | -2 | 1.08   | 1.50  |
| 0 | 10 | -2 | 0.54   | 1.19  |
| 0 | 10 | -2 | 1.26   | 1.47  |
| 0 | 10 | -2 | 0.44   | 0.90  |
| 0 | 10 | -2 | 1.18   | 1.13  |
| 0 | 10 | -2 | 1.85   | 1.32  |
| 0 | 10 | -1 | 488.14 | 10.16 |
| 0 | 10 | -1 | 507.19 | 9.34  |
| 0 | 10 | -1 | 556.70 | 11.40 |
| 0 | 10 | -1 | 501.02 | 11.00 |
| 0 | 10 | -1 | 538.36 | 10.94 |
| 0 | 10 | -1 | 508.14 | 10.93 |
| 0 | 10 | -1 | 487.62 | 10.39 |

## CIF 31

|   |    |     |        |       |
|---|----|-----|--------|-------|
| 0 | 10 | -1  | 517.62 | 9.44  |
| 0 | 10 | -1  | 508.95 | 10.86 |
| 0 | 10 | -1  | 479.46 | 9.51  |
| 0 | 10 | 0   | 149.65 | 5.44  |
| 0 | 10 | 0   | 156.32 | 4.76  |
| 0 | 10 | 0   | 131.54 | 5.26  |
| 0 | 10 | 0   | 128.65 | 5.21  |
| 0 | 10 | 0   | 149.57 | 5.32  |
| 0 | 10 | 0   | 145.03 | 5.43  |
| 0 | 10 | 0   | 134.38 | 5.41  |
| 0 | 10 | 0   | 137.90 | 4.94  |
| 0 | 10 | 1   | 636.25 | 11.69 |
| 0 | 10 | 1   | 610.72 | 11.15 |
| 0 | 10 | 1   | 572.23 | 10.80 |
| 0 | 10 | 1   | 569.26 | 10.40 |
| 0 | 10 | 1   | 602.85 | 11.34 |
| 0 | 10 | 1   | 586.62 | 11.40 |
| 0 | 10 | 1   | 594.62 | 11.52 |
| 0 | 10 | 1   | 564.96 | 10.77 |
| 0 | 10 | 2   | 57.99  | 3.37  |
| 0 | 10 | 2   | 57.22  | 2.97  |
| 0 | 10 | 2   | 50.49  | 2.66  |
| 0 | 10 | 2   | 49.64  | 2.93  |
| 0 | 10 | 2   | 57.37  | 3.16  |
| 0 | 10 | 2   | 56.05  | 3.37  |
| 0 | 10 | 2   | 55.21  | 3.22  |
| 0 | 10 | 2   | 55.93  | 3.16  |
| 0 | 10 | 3   | 31.61  | 2.18  |
| 0 | 10 | 3   | 24.98  | 2.10  |
| 0 | 10 | 3   | 27.14  | 2.17  |
| 0 | 10 | 3   | 24.31  | 2.02  |
| 0 | 10 | 3   | 25.02  | 2.11  |
| 0 | 10 | 4   | 3.06   | 1.09  |
| 0 | 10 | 4   | 2.22   | 0.88  |
| 0 | 10 | 4   | 3.84   | 1.02  |
| 0 | 10 | 4   | 3.53   | 0.84  |
| 0 | 10 | 5   | 93.02  | 2.95  |
| 0 | 10 | 5   | 106.21 | 3.20  |
| 0 | 11 | -11 | 26.72  | 1.19  |
| 0 | 11 | -10 | 79.49  | 3.07  |
| 0 | 11 | -10 | 75.79  | 2.97  |



## CIF 31

|   |    |     |        |      |
|---|----|-----|--------|------|
| 0 | 11 | -10 | 75.96  | 1.99 |
| 0 | 11 | -9  | 5.21   | 0.94 |
| 0 | 11 | -9  | 6.23   | 1.37 |
| 0 | 11 | -9  | 7.18   | 1.41 |
| 0 | 11 | -9  | 5.67   | 0.82 |
| 0 | 11 | -9  | 5.22   | 1.19 |
| 0 | 11 | -8  | 3.57   | 0.88 |
| 0 | 11 | -8  | 4.17   | 1.11 |
| 0 | 11 | -8  | 4.05   | 1.11 |
| 0 | 11 | -8  | 3.08   | 1.10 |
| 0 | 11 | -7  | 5.74   | 1.07 |
| 0 | 11 | -7  | 8.55   | 1.49 |
| 0 | 11 | -7  | 7.75   | 1.49 |
| 0 | 11 | -7  | 8.52   | 1.51 |
| 0 | 11 | -6  | 3.01   | 0.93 |
| 0 | 11 | -6  | 8.23   | 1.63 |
| 0 | 11 | -6  | 6.21   | 1.59 |
| 0 | 11 | -6  | 6.64   | 1.40 |
| 0 | 11 | -5  | 66.87  | 3.66 |
| 0 | 11 | -5  | 66.17  | 3.75 |
| 0 | 11 | -5  | 63.61  | 3.14 |
| 0 | 11 | -5  | 54.85  | 3.14 |
| 0 | 11 | -4  | 124.32 | 5.07 |
| 0 | 11 | -4  | 124.10 | 5.05 |
| 0 | 11 | -4  | 112.86 | 4.31 |
| 0 | 11 | -4  | 119.35 | 4.39 |
| 0 | 11 | -3  | 88.29  | 3.91 |
| 0 | 11 | -3  | 81.87  | 4.12 |
| 0 | 11 | -3  | 76.43  | 3.64 |
| 0 | 11 | -2  | 7.42   | 1.66 |
| 0 | 11 | -2  | 5.63   | 1.48 |
| 0 | 11 | -2  | 6.13   | 1.21 |
| 0 | 11 | -2  | 5.65   | 1.46 |
| 0 | 11 | -2  | 5.72   | 1.15 |
| 0 | 11 | -2  | 5.93   | 1.34 |
| 0 | 11 | -2  | 7.46   | 1.19 |
| 0 | 11 | -1  | 23.93  | 2.02 |
| 0 | 11 | -1  | 24.48  | 2.25 |
| 0 | 11 | -1  | 24.32  | 2.25 |
| 0 | 11 | -1  | 28.48  | 2.38 |
| 0 | 11 | -1  | 23.26  | 1.97 |

## CIF 31

|   |    |    |        |      |
|---|----|----|--------|------|
| 0 | 11 | -1 | 27.22  | 2.27 |
| 0 | 11 | -1 | 25.01  | 1.94 |
| 0 | 11 | 0  | 5.99   | 1.26 |
| 0 | 11 | 0  | 5.85   | 1.28 |
| 0 | 11 | 0  | 5.70   | 1.22 |
| 0 | 11 | 0  | 5.18   | 1.24 |
| 0 | 11 | 0  | 5.23   | 1.26 |
| 0 | 11 | 0  | 4.60   | 1.19 |
| 0 | 11 | 1  | 486.99 | 8.47 |
| 0 | 11 | 1  | 477.52 | 8.68 |
| 0 | 11 | 1  | 442.00 | 7.68 |
| 0 | 11 | 1  | 496.83 | 8.60 |
| 0 | 11 | 1  | 452.88 | 8.36 |
| 0 | 11 | 1  | 477.58 | 8.24 |
| 0 | 11 | 2  | 66.57  | 2.80 |
| 0 | 11 | 2  | 62.35  | 2.72 |
| 0 | 11 | 2  | 66.69  | 2.65 |
| 0 | 11 | 2  | 67.99  | 2.77 |
| 0 | 11 | 3  | 188.68 | 4.18 |
| 0 | 11 | 3  | 200.29 | 4.20 |
| 0 | 12 | -8 | 26.64  | 1.82 |
| 0 | 12 | -8 | 25.93  | 1.09 |
| 0 | 12 | -7 | 19.81  | 1.69 |
| 0 | 12 | -7 | 15.08  | 1.37 |
| 0 | 12 | -7 | 18.47  | 1.68 |
| 0 | 12 | -7 | 17.68  | 1.47 |
| 0 | 12 | -6 | 46.24  | 2.39 |
| 0 | 12 | -6 | 47.41  | 2.48 |
| 0 | 12 | -5 | 1.01   | 0.70 |
| 0 | 12 | -5 | 1.29   | 0.93 |
| 0 | 12 | -5 | 0.70   | 1.00 |
| 0 | 12 | -4 | 32.14  | 1.90 |
| 0 | 12 | -4 | 34.87  | 2.24 |
| 0 | 12 | -3 | 120.71 | 3.62 |
| 0 | 12 | -3 | 117.76 | 3.64 |
| 0 | 12 | -3 | 108.55 | 3.71 |
| 0 | 12 | -3 | 120.29 | 3.94 |
| 0 | 12 | -2 | 42.83  | 2.25 |
| 0 | 12 | -2 | 44.70  | 2.30 |
| 0 | 12 | -2 | 42.14  | 2.31 |
| 0 | 12 | -2 | 43.40  | 2.22 |

## CIF 31

|   |     |    |        |      |
|---|-----|----|--------|------|
| 0 | 12  | -1 | 41.79  | 2.05 |
| 0 | 12  | -1 | 37.96  | 2.06 |
| 0 | 12  | -1 | 39.28  | 1.91 |
| 0 | 12  | -1 | 36.72  | 1.84 |
| 1 | -12 | -1 | 0.81   | 0.43 |
| 1 | -12 | -1 | 0.39   | 0.48 |
| 1 | -12 | 0  | 27.91  | 1.39 |
| 1 | -12 | 0  | 25.77  | 1.17 |
| 1 | -12 | 0  | 25.77  | 1.53 |
| 1 | -12 | 1  | 51.39  | 2.24 |
| 1 | -12 | 1  | 45.19  | 1.78 |
| 1 | -12 | 2  | 1.03   | 0.64 |
| 1 | -12 | 2  | 1.45   | 0.60 |
| 1 | -12 | 3  | 5.03   | 0.82 |
| 1 | -12 | 3  | 5.40   | 0.91 |
| 1 | -12 | 3  | 5.18   | 0.98 |
| 1 | -12 | 3  | 4.71   | 0.93 |
| 1 | -12 | 4  | 185.65 | 4.40 |
| 1 | -12 | 4  | 175.23 | 4.47 |
| 1 | -12 | 5  | 61.31  | 2.21 |
| 1 | -12 | 5  | 59.40  | 2.44 |
| 1 | -12 | 5  | 57.75  | 2.48 |
| 1 | -12 | 6  | 81.89  | 2.81 |
| 1 | -12 | 6  | 83.41  | 2.82 |
| 1 | -12 | 7  | 57.84  | 2.25 |
| 1 | -12 | 7  | 55.10  | 2.21 |
| 1 | -12 | 8  | 238.58 | 4.30 |
| 1 | -12 | 8  | 217.36 | 4.04 |
| 1 | -12 | 9  | 202.42 | 3.70 |
| 1 | -11 | -4 | 337.10 | 4.09 |
| 1 | -11 | -3 | 0.48   | 0.40 |
| 1 | -11 | -3 | 1.60   | 0.75 |
| 1 | -11 | -2 | 363.48 | 5.82 |
| 1 | -11 | -2 | 374.71 | 6.80 |
| 1 | -11 | -1 | 38.54  | 2.26 |
| 1 | -11 | -1 | 33.86  | 1.94 |
| 1 | -11 | 0  | 33.75  | 2.04 |
| 1 | -11 | 0  | 33.48  | 1.84 |
| 1 | -11 | 1  | 3.98   | 1.05 |
| 1 | -11 | 1  | 5.74   | 1.19 |
| 1 | -11 | 2  | 300.19 | 6.03 |

## CIF 31

|   |     |    |        |      |
|---|-----|----|--------|------|
| 1 | -11 | 2  | 299.39 | 6.67 |
| 1 | -11 | 3  | 30.66  | 2.02 |
| 1 | -11 | 3  | 28.65  | 2.09 |
| 1 | -11 | 3  | 25.65  | 2.09 |
| 1 | -11 | 3  | 27.82  | 2.17 |
| 1 | -11 | 4  | 184.23 | 5.17 |
| 1 | -11 | 4  | 177.78 | 5.27 |
| 1 | -11 | 4  | 177.37 | 5.13 |
| 1 | -11 | 5  | 386.27 | 7.19 |
| 1 | -11 | 5  | 413.58 | 7.14 |
| 1 | -11 | 5  | 368.11 | 7.56 |
| 1 | -11 | 5  | 385.23 | 7.89 |
| 1 | -11 | 5  | 348.00 | 7.54 |
| 1 | -11 | 6  | 3.12   | 0.92 |
| 1 | -11 | 6  | 1.69   | 0.89 |
| 1 | -11 | 6  | 1.25   | 0.94 |
| 1 | -11 | 6  | 1.45   | 0.91 |
| 1 | -11 | 6  | 1.90   | 0.91 |
| 1 | -11 | 7  | 77.71  | 2.94 |
| 1 | -11 | 7  | 79.70  | 2.63 |
| 1 | -11 | 7  | 82.65  | 3.16 |
| 1 | -11 | 7  | 71.29  | 3.10 |
| 1 | -11 | 7  | 77.03  | 3.20 |
| 1 | -11 | 8  | 37.77  | 2.01 |
| 1 | -11 | 8  | 35.27  | 2.11 |
| 1 | -11 | 8  | 35.71  | 2.06 |
| 1 | -11 | 8  | 32.89  | 1.50 |
| 1 | -11 | 8  | 33.60  | 2.03 |
| 1 | -11 | 8  | 32.42  | 2.02 |
| 1 | -11 | 9  | 6.10   | 0.99 |
| 1 | -11 | 9  | 7.01   | 0.99 |
| 1 | -11 | 9  | 6.11   | 1.03 |
| 1 | -11 | 9  | 6.54   | 0.99 |
| 1 | -11 | 9  | 6.23   | 1.02 |
| 1 | -11 | 10 | 225.20 | 4.27 |
| 1 | -11 | 10 | 237.63 | 4.57 |
| 1 | -11 | 10 | 233.27 | 4.52 |
| 1 | -11 | 11 | 6.41   | 0.72 |
| 1 | -11 | 11 | 6.40   | 0.77 |
| 1 | -11 | 11 | 6.25   | 0.67 |
| 1 | -10 | -6 | 41.72  | 1.50 |

## CIF 31

|   |     |    |        |      |
|---|-----|----|--------|------|
| 1 | -10 | -5 | 400.62 | 6.03 |
| 1 | -10 | -4 | 24.79  | 1.53 |
| 1 | -10 | -4 | 20.24  | 1.70 |
| 1 | -10 | -3 | 365.91 | 6.31 |
| 1 | -10 | -3 | 339.12 | 6.08 |
| 1 | -10 | -3 | 360.69 | 7.56 |
| 1 | -10 | -3 | 348.02 | 6.92 |
| 1 | -10 | -2 | 134.83 | 3.61 |
| 1 | -10 | -2 | 122.62 | 4.50 |
| 1 | -10 | -2 | 128.63 | 3.46 |
| 1 | -10 | -1 | 144.77 | 3.71 |
| 1 | -10 | -1 | 148.19 | 4.07 |
| 1 | -10 | -1 | 146.10 | 4.58 |
| 1 | -10 | 0  | 135.38 | 4.75 |
| 1 | -10 | 0  | 146.43 | 4.56 |
| 1 | -10 | 1  | 113.88 | 3.97 |
| 1 | -10 | 1  | 122.08 | 4.62 |
| 1 | -10 | 2  | 29.82  | 2.38 |
| 1 | -10 | 2  | 26.63  | 2.21 |
| 1 | -10 | 2  | 27.29  | 1.93 |
| 1 | -10 | 2  | 27.56  | 2.36 |
| 1 | -10 | 2  | 31.77  | 2.20 |
| 1 | -10 | 3  | 3.94   | 1.03 |
| 1 | -10 | 3  | 3.61   | 0.88 |
| 1 | -10 | 3  | 3.79   | 1.07 |
| 1 | -10 | 3  | 3.99   | 1.12 |
| 1 | -10 | 3  | 2.16   | 0.77 |
| 1 | -10 | 3  | 3.87   | 1.28 |
| 1 | -10 | 3  | 3.23   | 1.21 |
| 1 | -10 | 3  | 4.09   | 1.20 |
| 1 | -10 | 3  | 2.32   | 1.19 |
| 1 | -10 | 4  | 272.44 | 5.77 |
| 1 | -10 | 4  | 273.91 | 6.04 |
| 1 | -10 | 4  | 253.98 | 6.14 |
| 1 | -10 | 4  | 260.78 | 5.63 |
| 1 | -10 | 4  | 264.44 | 6.17 |
| 1 | -10 | 4  | 268.64 | 6.45 |
| 1 | -10 | 4  | 271.64 | 6.81 |
| 1 | -10 | 4  | 279.96 | 7.04 |
| 1 | -10 | 4  | 283.25 | 7.06 |
| 1 | -10 | 4  | 273.22 | 6.82 |

## CIF 31

|   |     |   |        |      |
|---|-----|---|--------|------|
| 1 | -10 | 5 | 50.21  | 2.45 |
| 1 | -10 | 5 | 47.63  | 2.56 |
| 1 | -10 | 5 | 49.87  | 2.77 |
| 1 | -10 | 5 | 54.49  | 2.98 |
| 1 | -10 | 5 | 50.38  | 2.43 |
| 1 | -10 | 5 | 46.66  | 2.47 |
| 1 | -10 | 5 | 54.79  | 2.73 |
| 1 | -10 | 5 | 53.65  | 3.11 |
| 1 | -10 | 5 | 50.23  | 2.97 |
| 1 | -10 | 5 | 62.05  | 3.31 |
| 1 | -10 | 5 | 52.34  | 3.00 |
| 1 | -10 | 5 | 52.48  | 2.97 |
| 1 | -10 | 6 | 100.25 | 3.43 |
| 1 | -10 | 6 | 100.22 | 3.45 |
| 1 | -10 | 6 | 100.67 | 3.99 |
| 1 | -10 | 6 | 97.44  | 3.53 |
| 1 | -10 | 6 | 99.92  | 4.20 |
| 1 | -10 | 6 | 97.24  | 4.12 |
| 1 | -10 | 6 | 98.88  | 4.11 |
| 1 | -10 | 6 | 104.23 | 4.14 |
| 1 | -10 | 6 | 113.18 | 3.69 |
| 1 | -10 | 6 | 102.15 | 3.89 |
| 1 | -10 | 6 | 107.66 | 3.73 |
| 1 | -10 | 6 | 97.78  | 4.07 |
| 1 | -10 | 7 | 18.72  | 1.63 |
| 1 | -10 | 7 | 21.22  | 1.96 |
| 1 | -10 | 7 | 21.29  | 1.90 |
| 1 | -10 | 7 | 20.43  | 1.57 |
| 1 | -10 | 7 | 19.84  | 1.63 |
| 1 | -10 | 7 | 21.52  | 2.05 |
| 1 | -10 | 7 | 22.32  | 2.06 |
| 1 | -10 | 7 | 22.23  | 2.07 |
| 1 | -10 | 7 | 22.95  | 1.82 |
| 1 | -10 | 8 | 64.66  | 3.13 |
| 1 | -10 | 8 | 64.11  | 2.97 |
| 1 | -10 | 8 | 58.47  | 2.61 |
| 1 | -10 | 8 | 56.54  | 2.65 |
| 1 | -10 | 8 | 69.37  | 2.48 |
| 1 | -10 | 8 | 62.82  | 3.10 |
| 1 | -10 | 8 | 55.70  | 3.01 |
| 1 | -10 | 8 | 64.30  | 3.12 |

## CIF 31

|   |     |    |        |      |
|---|-----|----|--------|------|
| 1 | -10 | 8  | 72.44  | 3.15 |
| 1 | -10 | 8  | 64.30  | 3.15 |
| 1 | -10 | 9  | 67.63  | 2.98 |
| 1 | -10 | 9  | 65.30  | 2.89 |
| 1 | -10 | 9  | 60.13  | 2.51 |
| 1 | -10 | 9  | 54.71  | 2.52 |
| 1 | -10 | 9  | 65.07  | 3.06 |
| 1 | -10 | 9  | 61.45  | 2.97 |
| 1 | -10 | 9  | 64.75  | 2.99 |
| 1 | -10 | 9  | 67.45  | 2.97 |
| 1 | -10 | 10 | 5.77   | 1.08 |
| 1 | -10 | 10 | 6.85   | 1.11 |
| 1 | -10 | 10 | 6.17   | 0.90 |
| 1 | -10 | 10 | 4.01   | 0.83 |
| 1 | -10 | 10 | 6.09   | 1.22 |
| 1 | -10 | 10 | 6.59   | 1.11 |
| 1 | -10 | 10 | 5.40   | 1.08 |
| 1 | -10 | 11 | 21.60  | 1.46 |
| 1 | -10 | 11 | 22.60  | 1.53 |
| 1 | -10 | 11 | 18.75  | 1.21 |
| 1 | -10 | 11 | 21.73  | 1.51 |
| 1 | -10 | 12 | 83.29  | 2.37 |
| 1 | -10 | 12 | 83.65  | 2.30 |
| 1 | -9  | -8 | 14.41  | 0.97 |
| 1 | -9  | -7 | 221.23 | 4.30 |
| 1 | -9  | -7 | 201.66 | 4.25 |
| 1 | -9  | -6 | 22.30  | 1.67 |
| 1 | -9  | -6 | 25.30  | 1.67 |
| 1 | -9  | -6 | 22.53  | 1.18 |
| 1 | -9  | -5 | 162.22 | 3.69 |
| 1 | -9  | -5 | 168.93 | 4.42 |
| 1 | -9  | -4 | 0.46   | 0.74 |
| 1 | -9  | -4 | 0.33   | 0.81 |
| 1 | -9  | -4 | 0.44   | 0.99 |
| 1 | -9  | -4 | 0.72   | 0.88 |
| 1 | -9  | -4 | 1.05   | 0.79 |
| 1 | -9  | -3 | 147.79 | 5.26 |
| 1 | -9  | -3 | 145.63 | 4.90 |
| 1 | -9  | -3 | 159.14 | 3.93 |
| 1 | -9  | -2 | 20.35  | 1.68 |
| 1 | -9  | -2 | 24.45  | 2.12 |

## CIF 31

|   |    |    |        |      |
|---|----|----|--------|------|
| 1 | -9 | -2 | 22.93  | 1.75 |
| 1 | -9 | -2 | 19.34  | 1.64 |
| 1 | -9 | -2 | 24.77  | 1.73 |
| 1 | -9 | -2 | 23.04  | 1.96 |
| 1 | -9 | -1 | 103.76 | 3.41 |
| 1 | -9 | -1 | 98.99  | 3.55 |
| 1 | -9 | -1 | 102.60 | 3.65 |
| 1 | -9 | -1 | 97.02  | 3.50 |
| 1 | -9 | -1 | 91.70  | 3.99 |
| 1 | -9 | -1 | 101.88 | 3.91 |
| 1 | -9 | 0  | 0.63   | 0.83 |
| 1 | -9 | 0  | 0.06   | 0.65 |
| 1 | -9 | 0  | 0.48   | 0.69 |
| 1 | -9 | 0  | 0.80   | 0.96 |
| 1 | -9 | 0  | 0.69   | 0.79 |
| 1 | -9 | 0  | 1.11   | 1.02 |
| 1 | -9 | 0  | 0.33   | 0.72 |
| 1 | -9 | 1  | 31.55  | 2.03 |
| 1 | -9 | 1  | 28.75  | 2.14 |
| 1 | -9 | 1  | 30.37  | 2.03 |
| 1 | -9 | 1  | 30.16  | 2.37 |
| 1 | -9 | 1  | 33.66  | 2.46 |
| 1 | -9 | 1  | 32.53  | 2.17 |
| 1 | -9 | 1  | 31.00  | 2.10 |
| 1 | -9 | 1  | 29.08  | 2.44 |
| 1 | -9 | 1  | 31.67  | 2.15 |
| 1 | -9 | 2  | 4.61   | 1.10 |
| 1 | -9 | 2  | 6.73   | 1.13 |
| 1 | -9 | 2  | 5.08   | 1.21 |
| 1 | -9 | 2  | 4.60   | 1.14 |
| 1 | -9 | 2  | 5.83   | 1.19 |
| 1 | -9 | 2  | 5.80   | 1.39 |
| 1 | -9 | 2  | 5.08   | 1.01 |
| 1 | -9 | 2  | 4.20   | 1.16 |
| 1 | -9 | 2  | 4.89   | 1.32 |
| 1 | -9 | 3  | 58.53  | 2.74 |
| 1 | -9 | 3  | 62.57  | 3.13 |
| 1 | -9 | 3  | 59.14  | 3.03 |
| 1 | -9 | 3  | 62.29  | 3.17 |
| 1 | -9 | 3  | 59.77  | 2.72 |
| 1 | -9 | 3  | 64.64  | 2.91 |



## CIF 31

|   |    |   |        |       |
|---|----|---|--------|-------|
| 1 | -9 | 3 | 57.17  | 3.29  |
| 1 | -9 | 3 | 59.55  | 3.19  |
| 1 | -9 | 3 | 60.66  | 3.29  |
| 1 | -9 | 3 | 54.52  | 2.56  |
| 1 | -9 | 3 | 61.61  | 3.28  |
| 1 | -9 | 3 | 59.95  | 3.10  |
| 1 | -9 | 4 | 454.75 | 8.65  |
| 1 | -9 | 4 | 458.24 | 8.79  |
| 1 | -9 | 4 | 470.97 | 8.23  |
| 1 | -9 | 4 | 423.70 | 8.15  |
| 1 | -9 | 4 | 493.12 | 9.12  |
| 1 | -9 | 4 | 446.55 | 8.98  |
| 1 | -9 | 4 | 473.33 | 8.51  |
| 1 | -9 | 4 | 401.75 | 8.86  |
| 1 | -9 | 4 | 435.29 | 9.12  |
| 1 | -9 | 4 | 504.76 | 8.58  |
| 1 | -9 | 4 | 464.11 | 9.18  |
| 1 | -9 | 5 | 764.81 | 11.97 |
| 1 | -9 | 5 | 841.46 | 12.49 |
| 1 | -9 | 5 | 804.93 | 12.55 |
| 1 | -9 | 5 | 789.25 | 11.67 |
| 1 | -9 | 5 | 819.15 | 12.12 |
| 1 | -9 | 5 | 786.06 | 13.17 |
| 1 | -9 | 5 | 798.19 | 12.88 |
| 1 | -9 | 5 | 801.74 | 11.72 |
| 1 | -9 | 5 | 769.24 | 12.86 |
| 1 | -9 | 5 | 787.38 | 12.73 |
| 1 | -9 | 5 | 869.40 | 12.56 |
| 1 | -9 | 5 | 778.41 | 12.91 |
| 1 | -9 | 6 | 593.62 | 10.22 |
| 1 | -9 | 6 | 650.90 | 10.88 |
| 1 | -9 | 6 | 616.04 | 11.03 |
| 1 | -9 | 6 | 649.30 | 10.46 |
| 1 | -9 | 6 | 691.44 | 11.92 |
| 1 | -9 | 6 | 676.93 | 10.17 |
| 1 | -9 | 6 | 613.28 | 11.18 |
| 1 | -9 | 6 | 577.21 | 10.92 |
| 1 | -9 | 6 | 637.79 | 11.13 |
| 1 | -9 | 6 | 696.57 | 11.42 |
| 1 | -9 | 6 | 639.18 | 10.54 |
| 1 | -9 | 6 | 644.97 | 11.32 |

## CIF 31

|   |    |    |         |       |
|---|----|----|---------|-------|
| 1 | -9 | 7  | 307.74  | 6.65  |
| 1 | -9 | 7  | 277.96  | 6.62  |
| 1 | -9 | 7  | 275.96  | 6.79  |
| 1 | -9 | 7  | 255.75  | 5.67  |
| 1 | -9 | 7  | 274.28  | 6.99  |
| 1 | -9 | 7  | 282.37  | 7.15  |
| 1 | -9 | 7  | 270.94  | 7.05  |
| 1 | -9 | 7  | 293.20  | 7.22  |
| 1 | -9 | 7  | 289.61  | 7.32  |
| 1 | -9 | 7  | 281.37  | 7.08  |
| 1 | -9 | 8  | 1546.22 | 19.88 |
| 1 | -9 | 8  | 1690.25 | 19.91 |
| 1 | -9 | 8  | 1872.72 | 21.54 |
| 1 | -9 | 8  | 1633.68 | 20.44 |
| 1 | -9 | 8  | 1928.73 | 19.22 |
| 1 | -9 | 8  | 1820.36 | 21.49 |
| 1 | -9 | 8  | 1773.50 | 21.63 |
| 1 | -9 | 8  | 1705.15 | 21.58 |
| 1 | -9 | 8  | 1583.91 | 21.03 |
| 1 | -9 | 8  | 1890.42 | 22.24 |
| 1 | -9 | 8  | 1869.86 | 21.96 |
| 1 | -9 | 9  | 12.24   | 2.61  |
| 1 | -9 | 9  | 13.38   | 1.66  |
| 1 | -9 | 9  | 8.11    | 1.43  |
| 1 | -9 | 9  | 9.04    | 1.51  |
| 1 | -9 | 9  | 10.46   | 1.39  |
| 1 | -9 | 9  | 11.96   | 2.12  |
| 1 | -9 | 9  | 11.18   | 1.46  |
| 1 | -9 | 10 | 545.07  | 9.48  |
| 1 | -9 | 10 | 553.37  | 9.50  |
| 1 | -9 | 10 | 536.62  | 9.66  |
| 1 | -9 | 10 | 559.97  | 9.68  |
| 1 | -9 | 11 | 8.74    | 1.63  |
| 1 | -9 | 11 | 8.79    | 1.27  |
| 1 | -9 | 11 | 6.42    | 1.05  |
| 1 | -9 | 11 | 8.02    | 1.23  |
| 1 | -9 | 11 | 6.86    | 1.19  |
| 1 | -9 | 12 | 0.98    | 0.78  |
| 1 | -9 | 12 | 0.97    | 0.64  |
| 1 | -9 | 12 | 0.40    | 0.62  |
| 1 | -9 | 12 | 0.58    | 0.69  |

## CIF 31

|   |    |    |        |      |
|---|----|----|--------|------|
| 1 | -9 | 13 | 49.68  | 1.93 |
| 1 | -9 | 13 | 43.77  | 1.66 |
| 1 | -8 | -9 | 9.21   | 0.88 |
| 1 | -8 | -9 | 10.72  | 1.10 |
| 1 | -8 | -9 | 9.51   | 0.95 |
| 1 | -8 | -9 | 8.49   | 0.72 |
| 1 | -8 | -8 | 76.02  | 3.03 |
| 1 | -8 | -8 | 72.74  | 2.62 |
| 1 | -8 | -8 | 66.77  | 2.22 |
| 1 | -8 | -7 | 478.19 | 8.74 |
| 1 | -8 | -7 | 426.88 | 6.95 |
| 1 | -8 | -6 | 338.22 | 6.20 |
| 1 | -8 | -6 | 332.37 | 7.86 |
| 1 | -8 | -6 | 340.32 | 6.85 |
| 1 | -8 | -5 | 145.23 | 3.95 |
| 1 | -8 | -5 | 139.93 | 4.36 |
| 1 | -8 | -5 | 146.49 | 4.60 |
| 1 | -8 | -5 | 133.77 | 3.79 |
| 1 | -8 | -5 | 144.29 | 5.24 |
| 1 | -8 | -5 | 150.24 | 5.01 |
| 1 | -8 | -5 | 134.90 | 4.32 |
| 1 | -8 | -5 | 146.72 | 4.66 |
| 1 | -8 | -5 | 149.52 | 4.51 |
| 1 | -8 | -4 | 196.61 | 4.87 |
| 1 | -8 | -4 | 199.65 | 5.23 |
| 1 | -8 | -4 | 179.04 | 4.34 |
| 1 | -8 | -4 | 173.57 | 5.74 |
| 1 | -8 | -4 | 167.34 | 4.88 |
| 1 | -8 | -4 | 187.15 | 5.64 |
| 1 | -8 | -4 | 176.58 | 5.02 |
| 1 | -8 | -4 | 184.57 | 5.34 |
| 1 | -8 | -4 | 183.13 | 5.18 |
| 1 | -8 | -3 | 85.46  | 3.44 |
| 1 | -8 | -3 | 87.00  | 3.78 |
| 1 | -8 | -3 | 82.68  | 3.41 |
| 1 | -8 | -3 | 90.17  | 3.09 |
| 1 | -8 | -3 | 88.60  | 3.60 |
| 1 | -8 | -3 | 86.82  | 3.64 |
| 1 | -8 | -2 | 370.13 | 7.36 |
| 1 | -8 | -2 | 332.66 | 6.98 |
| 1 | -8 | -2 | 356.58 | 6.74 |

## CIF 31

|   |    |    |         |       |
|---|----|----|---------|-------|
| 1 | -8 | -2 | 353.73  | 7.82  |
| 1 | -8 | -2 | 335.25  | 7.22  |
| 1 | -8 | -1 | 18.52   | 1.61  |
| 1 | -8 | -1 | 22.36   | 1.91  |
| 1 | -8 | -1 | 19.78   | 1.85  |
| 1 | -8 | -1 | 18.37   | 1.72  |
| 1 | -8 | -1 | 22.51   | 1.71  |
| 1 | -8 | -1 | 18.33   | 1.92  |
| 1 | -8 | 0  | 1502.65 | 17.33 |
| 1 | -8 | 0  | 1522.58 | 18.46 |
| 1 | -8 | 0  | 1277.33 | 16.85 |
| 1 | -8 | 0  | 1447.29 | 18.87 |
| 1 | -8 | 0  | 1470.73 | 18.40 |
| 1 | -8 | 0  | 1593.25 | 17.94 |
| 1 | -8 | 0  | 1421.45 | 18.58 |
| 1 | -8 | 0  | 1465.13 | 17.25 |
| 1 | -8 | 0  | 1390.40 | 17.53 |
| 1 | -8 | 0  | 1501.46 | 17.47 |
| 1 | -8 | 1  | 2.93    | 0.93  |
| 1 | -8 | 1  | 3.91    | 0.91  |
| 1 | -8 | 1  | 2.19    | 0.81  |
| 1 | -8 | 1  | 3.33    | 1.03  |
| 1 | -8 | 1  | 4.20    | 1.13  |
| 1 | -8 | 1  | 6.58    | 1.19  |
| 1 | -8 | 1  | 3.93    | 0.90  |
| 1 | -8 | 1  | 3.95    | 0.86  |
| 1 | -8 | 1  | 3.43    | 1.03  |
| 1 | -8 | 1  | 3.17    | 1.07  |
| 1 | -8 | 1  | 3.40    | 1.10  |
| 1 | -8 | 1  | 3.03    | 0.91  |
| 1 | -8 | 2  | 628.72  | 9.62  |
| 1 | -8 | 2  | 584.54  | 9.73  |
| 1 | -8 | 2  | 571.39  | 9.68  |
| 1 | -8 | 2  | 614.64  | 10.23 |
| 1 | -8 | 2  | 632.15  | 10.24 |
| 1 | -8 | 2  | 643.08  | 9.61  |
| 1 | -8 | 2  | 608.49  | 9.65  |
| 1 | -8 | 2  | 653.27  | 10.22 |
| 1 | -8 | 2  | 655.72  | 11.02 |
| 1 | -8 | 2  | 673.20  | 10.76 |
| 1 | -8 | 2  | 591.13  | 10.32 |

## CIF 31

|   |    |   |        |       |
|---|----|---|--------|-------|
| 1 | -8 | 2 | 598.88 | 9.35  |
| 1 | -8 | 2 | 621.13 | 10.50 |
| 1 | -8 | 2 | 630.26 | 9.82  |
| 1 | -8 | 2 | 638.37 | 10.28 |
| 1 | -8 | 3 | 176.53 | 5.06  |
| 1 | -8 | 3 | 194.00 | 5.14  |
| 1 | -8 | 3 | 192.74 | 5.24  |
| 1 | -8 | 3 | 181.54 | 4.72  |
| 1 | -8 | 3 | 182.13 | 4.36  |
| 1 | -8 | 3 | 183.87 | 4.92  |
| 1 | -8 | 3 | 168.75 | 5.30  |
| 1 | -8 | 3 | 192.55 | 5.40  |
| 1 | -8 | 3 | 184.41 | 5.41  |
| 1 | -8 | 3 | 195.45 | 4.58  |
| 1 | -8 | 3 | 188.83 | 5.37  |
| 1 | -8 | 3 | 181.93 | 4.79  |
| 1 | -8 | 3 | 193.86 | 4.92  |
| 1 | -8 | 3 | 192.51 | 5.32  |
| 1 | -8 | 4 | 282.06 | 6.91  |
| 1 | -8 | 4 | 249.34 | 5.98  |
| 1 | -8 | 4 | 264.41 | 6.16  |
| 1 | -8 | 4 | 254.55 | 6.15  |
| 1 | -8 | 4 | 262.67 | 5.81  |
| 1 | -8 | 4 | 247.98 | 5.89  |
| 1 | -8 | 4 | 264.10 | 6.42  |
| 1 | -8 | 4 | 229.69 | 6.11  |
| 1 | -8 | 4 | 227.80 | 4.84  |
| 1 | -8 | 4 | 250.64 | 6.29  |
| 1 | -8 | 4 | 253.41 | 5.68  |
| 1 | -8 | 4 | 243.27 | 6.54  |
| 1 | -8 | 4 | 264.58 | 6.40  |
| 1 | -8 | 5 | 158.83 | 5.08  |
| 1 | -8 | 5 | 136.01 | 4.22  |
| 1 | -8 | 5 | 162.26 | 4.78  |
| 1 | -8 | 5 | 162.70 | 4.87  |
| 1 | -8 | 5 | 170.60 | 4.89  |
| 1 | -8 | 5 | 176.71 | 5.41  |
| 1 | -8 | 5 | 175.54 | 5.17  |
| 1 | -8 | 5 | 153.09 | 5.05  |
| 1 | -8 | 5 | 187.11 | 5.34  |
| 1 | -8 | 5 | 162.16 | 4.46  |

## CIF 31

|   |    |    |        |      |
|---|----|----|--------|------|
| 1 | -8 | 5  | 146.76 | 5.59 |
| 1 | -8 | 6  | 45.45  | 2.91 |
| 1 | -8 | 6  | 43.77  | 2.40 |
| 1 | -8 | 6  | 45.46  | 2.63 |
| 1 | -8 | 6  | 48.12  | 2.85 |
| 1 | -8 | 6  | 44.64  | 2.80 |
| 1 | -8 | 6  | 48.66  | 2.37 |
| 1 | -8 | 6  | 45.40  | 2.76 |
| 1 | -8 | 6  | 45.05  | 4.72 |
| 1 | -8 | 7  | 260.31 | 6.68 |
| 1 | -8 | 7  | 243.58 | 5.34 |
| 1 | -8 | 7  | 225.91 | 5.60 |
| 1 | -8 | 7  | 259.93 | 6.50 |
| 1 | -8 | 7  | 275.81 | 6.27 |
| 1 | -8 | 7  | 255.00 | 6.56 |
| 1 | -8 | 7  | 235.89 | 6.48 |
| 1 | -8 | 7  | 250.07 | 6.61 |
| 1 | -8 | 7  | 234.65 | 8.31 |
| 1 | -8 | 8  | 18.79  | 1.68 |
| 1 | -8 | 8  | 23.26  | 2.84 |
| 1 | -8 | 8  | 22.38  | 2.65 |
| 1 | -8 | 8  | 17.92  | 1.36 |
| 1 | -8 | 8  | 19.47  | 1.82 |
| 1 | -8 | 8  | 19.41  | 2.01 |
| 1 | -8 | 8  | 20.33  | 2.03 |
| 1 | -8 | 8  | 21.11  | 4.10 |
| 1 | -8 | 8  | 20.30  | 1.93 |
| 1 | -8 | 9  | 109.23 | 3.75 |
| 1 | -8 | 9  | 104.97 | 4.89 |
| 1 | -8 | 9  | 105.13 | 4.56 |
| 1 | -8 | 9  | 112.54 | 4.37 |
| 1 | -8 | 9  | 105.01 | 4.19 |
| 1 | -8 | 9  | 113.70 | 5.65 |
| 1 | -8 | 9  | 114.08 | 4.24 |
| 1 | -8 | 10 | 102.80 | 3.48 |
| 1 | -8 | 10 | 84.09  | 4.79 |
| 1 | -8 | 10 | 87.18  | 4.74 |
| 1 | -8 | 10 | 98.86  | 4.02 |
| 1 | -8 | 10 | 97.90  | 4.00 |
| 1 | -8 | 10 | 95.21  | 3.72 |
| 1 | -8 | 11 | 436.69 | 9.00 |

## CIF 31

|   |    |     |         |       |
|---|----|-----|---------|-------|
| 1 | -8 | 11  | 428.61  | 8.49  |
| 1 | -8 | 11  | 451.45  | 8.60  |
| 1 | -8 | 12  | 329.94  | 6.73  |
| 1 | -8 | 12  | 342.48  | 6.79  |
| 1 | -8 | 13  | 91.91   | 2.97  |
| 1 | -8 | 13  | 104.14  | 3.07  |
| 1 | -8 | 14  | 48.65   | 1.72  |
| 1 | -7 | -10 | 19.00   | 1.17  |
| 1 | -7 | -10 | 18.80   | 1.17  |
| 1 | -7 | -9  | 250.20  | 6.01  |
| 1 | -7 | -9  | 255.61  | 5.08  |
| 1 | -7 | -9  | 249.11  | 4.97  |
| 1 | -7 | -8  | 104.84  | 3.59  |
| 1 | -7 | -8  | 106.73  | 3.41  |
| 1 | -7 | -8  | 101.49  | 3.22  |
| 1 | -7 | -7  | 70.85   | 3.06  |
| 1 | -7 | -7  | 68.34   | 2.90  |
| 1 | -7 | -7  | 59.82   | 3.39  |
| 1 | -7 | -7  | 62.76   | 2.83  |
| 1 | -7 | -7  | 65.10   | 2.82  |
| 1 | -7 | -6  | 553.07  | 8.91  |
| 1 | -7 | -6  | 512.58  | 10.58 |
| 1 | -7 | -6  | 494.63  | 9.43  |
| 1 | -7 | -6  | 499.02  | 9.96  |
| 1 | -7 | -6  | 547.02  | 9.54  |
| 1 | -7 | -6  | 583.53  | 9.72  |
| 1 | -7 | -6  | 565.21  | 9.40  |
| 1 | -7 | -5  | 665.11  | 9.81  |
| 1 | -7 | -5  | 703.98  | 10.21 |
| 1 | -7 | -5  | 679.35  | 12.16 |
| 1 | -7 | -5  | 661.68  | 11.00 |
| 1 | -7 | -5  | 642.37  | 11.56 |
| 1 | -7 | -5  | 617.75  | 10.71 |
| 1 | -7 | -5  | 666.24  | 10.75 |
| 1 | -7 | -5  | 729.22  | 11.15 |
| 1 | -7 | -5  | 693.01  | 10.75 |
| 1 | -7 | -4  | 1626.61 | 17.56 |
| 1 | -7 | -4  | 1506.11 | 20.13 |
| 1 | -7 | -4  | 1489.02 | 18.69 |
| 1 | -7 | -4  | 1493.04 | 19.42 |
| 1 | -7 | -4  | 1427.43 | 18.47 |

## CIF 31

|   |    |    |         |       |
|---|----|----|---------|-------|
| 1 | -7 | -4 | 1642.22 | 19.10 |
| 1 | -7 | -4 | 1571.68 | 18.71 |
| 1 | -7 | -3 | 439.01  | 7.13  |
| 1 | -7 | -3 | 471.87  | 8.45  |
| 1 | -7 | -3 | 466.31  | 8.37  |
| 1 | -7 | -3 | 444.88  | 8.81  |
| 1 | -7 | -3 | 453.01  | 8.77  |
| 1 | -7 | -3 | 423.33  | 7.17  |
| 1 | -7 | -3 | 487.76  | 8.48  |
| 1 | -7 | -3 | 486.44  | 8.41  |
| 1 | -7 | -2 | 60.85   | 2.73  |
| 1 | -7 | -2 | 75.92   | 3.14  |
| 1 | -7 | -2 | 66.22   | 3.09  |
| 1 | -7 | -2 | 76.94   | 2.79  |
| 1 | -7 | -2 | 69.15   | 2.95  |
| 1 | -7 | -1 | 12.98   | 1.28  |
| 1 | -7 | -1 | 14.00   | 1.50  |
| 1 | -7 | -1 | 15.06   | 1.41  |
| 1 | -7 | -1 | 12.85   | 1.45  |
| 1 | -7 | -1 | 14.60   | 1.55  |
| 1 | -7 | -1 | 13.22   | 1.38  |
| 1 | -7 | -1 | 12.96   | 1.24  |
| 1 | -7 | -1 | 11.13   | 1.13  |
| 1 | -7 | 0  | 57.66   | 2.45  |
| 1 | -7 | 0  | 50.62   | 2.55  |
| 1 | -7 | 0  | 48.66   | 2.58  |
| 1 | -7 | 0  | 52.39   | 2.47  |
| 1 | -7 | 0  | 56.31   | 2.17  |
| 1 | -7 | 0  | 56.51   | 2.48  |
| 1 | -7 | 0  | 63.44   | 2.91  |
| 1 | -7 | 0  | 52.60   | 2.66  |
| 1 | -7 | 0  | 64.65   | 2.62  |
| 1 | -7 | 0  | 63.32   | 2.92  |
| 1 | -7 | 0  | 56.50   | 2.49  |
| 1 | -7 | 0  | 66.24   | 2.58  |
| 1 | -7 | 0  | 62.76   | 2.55  |
| 1 | -7 | 1  | 326.05  | 6.22  |
| 1 | -7 | 1  | 333.68  | 6.55  |
| 1 | -7 | 1  | 356.76  | 6.82  |
| 1 | -7 | 1  | 300.02  | 6.46  |
| 1 | -7 | 1  | 342.99  | 6.53  |



## CIF 31

|   |    |   |         |       |
|---|----|---|---------|-------|
| 1 | -7 | 1 | 335.33  | 6.62  |
| 1 | -7 | 1 | 368.20  | 6.35  |
| 1 | -7 | 1 | 328.97  | 5.73  |
| 1 | -7 | 1 | 352.19  | 6.49  |
| 1 | -7 | 1 | 361.17  | 7.26  |
| 1 | -7 | 1 | 320.48  | 6.65  |
| 1 | -7 | 1 | 353.81  | 6.34  |
| 1 | -7 | 1 | 341.25  | 6.89  |
| 1 | -7 | 1 | 331.26  | 6.32  |
| 1 | -7 | 1 | 317.22  | 6.13  |
| 1 | -7 | 1 | 351.62  | 6.54  |
| 1 | -7 | 2 | 682.60  | 9.96  |
| 1 | -7 | 2 | 619.36  | 9.79  |
| 1 | -7 | 2 | 687.09  | 9.87  |
| 1 | -7 | 2 | 631.39  | 9.71  |
| 1 | -7 | 2 | 642.29  | 9.23  |
| 1 | -7 | 2 | 655.80  | 9.60  |
| 1 | -7 | 2 | 655.99  | 8.90  |
| 1 | -7 | 2 | 633.22  | 8.74  |
| 1 | -7 | 2 | 633.86  | 10.43 |
| 1 | -7 | 2 | 648.86  | 10.00 |
| 1 | -7 | 2 | 683.00  | 10.28 |
| 1 | -7 | 2 | 623.00  | 8.86  |
| 1 | -7 | 2 | 676.70  | 10.23 |
| 1 | -7 | 2 | 589.59  | 9.29  |
| 1 | -7 | 3 | 35.41   | 2.18  |
| 1 | -7 | 3 | 29.42   | 1.83  |
| 1 | -7 | 3 | 26.94   | 1.86  |
| 1 | -7 | 3 | 27.43   | 1.88  |
| 1 | -7 | 3 | 27.82   | 1.93  |
| 1 | -7 | 3 | 28.71   | 2.01  |
| 1 | -7 | 3 | 32.30   | 1.67  |
| 1 | -7 | 3 | 27.90   | 1.96  |
| 1 | -7 | 3 | 33.88   | 1.88  |
| 1 | -7 | 3 | 24.52   | 2.85  |
| 1 | -7 | 4 | 1110.19 | 14.35 |
| 1 | -7 | 4 | 1014.20 | 13.24 |
| 1 | -7 | 4 | 1016.44 | 14.14 |
| 1 | -7 | 4 | 1056.47 | 13.93 |
| 1 | -7 | 4 | 1042.61 | 11.80 |
| 1 | -7 | 4 | 1004.57 | 13.71 |

## CIF 31

|   |    |    |         |       |
|---|----|----|---------|-------|
| 1 | -7 | 4  | 1067.20 | 12.96 |
| 1 | -7 | 5  | 12.90   | 1.31  |
| 1 | -7 | 5  | 13.17   | 1.51  |
| 1 | -7 | 5  | 15.61   | 1.60  |
| 1 | -7 | 5  | 10.61   | 1.16  |
| 1 | -7 | 5  | 13.12   | 2.41  |
| 1 | -7 | 6  | 854.71  | 12.61 |
| 1 | -7 | 6  | 770.49  | 11.08 |
| 1 | -7 | 6  | 762.83  | 11.40 |
| 1 | -7 | 6  | 835.18  | 12.25 |
| 1 | -7 | 6  | 779.65  | 12.17 |
| 1 | -7 | 6  | 811.10  | 12.12 |
| 1 | -7 | 6  | 827.86  | 10.79 |
| 1 | -7 | 6  | 690.51  | 12.69 |
| 1 | -7 | 7  | 14.05   | 1.66  |
| 1 | -7 | 7  | 14.42   | 1.49  |
| 1 | -7 | 7  | 14.00   | 1.51  |
| 1 | -7 | 7  | 15.60   | 1.57  |
| 1 | -7 | 7  | 17.06   | 1.33  |
| 1 | -7 | 7  | 14.97   | 1.71  |
| 1 | -7 | 7  | 14.70   | 1.73  |
| 1 | -7 | 7  | 10.01   | 2.53  |
| 1 | -7 | 8  | 475.87  | 9.08  |
| 1 | -7 | 8  | 496.71  | 8.67  |
| 1 | -7 | 8  | 516.49  | 9.09  |
| 1 | -7 | 8  | 560.05  | 9.33  |
| 1 | -7 | 8  | 480.00  | 8.80  |
| 1 | -7 | 8  | 477.82  | 9.39  |
| 1 | -7 | 8  | 449.67  | 9.15  |
| 1 | -7 | 8  | 449.46  | 7.75  |
| 1 | -7 | 8  | 423.18  | 10.51 |
| 1 | -7 | 9  | 446.91  | 8.70  |
| 1 | -7 | 9  | 428.16  | 8.15  |
| 1 | -7 | 9  | 443.05  | 8.52  |
| 1 | -7 | 9  | 508.29  | 9.74  |
| 1 | -7 | 9  | 493.99  | 9.02  |
| 1 | -7 | 9  | 395.83  | 8.76  |
| 1 | -7 | 9  | 418.05  | 8.85  |
| 1 | -7 | 9  | 424.07  | 7.71  |
| 1 | -7 | 10 | 22.52   | 1.84  |
| 1 | -7 | 10 | 23.39   | 1.93  |

## CIF 31

|   |    |     |        |      |
|---|----|-----|--------|------|
| 1 | -7 | 10  | 24.59  | 2.92 |
| 1 | -7 | 10  | 21.91  | 2.69 |
| 1 | -7 | 10  | 22.19  | 2.13 |
| 1 | -7 | 10  | 21.69  | 3.44 |
| 1 | -7 | 10  | 22.23  | 1.83 |
| 1 | -7 | 11  | 141.18 | 5.72 |
| 1 | -7 | 11  | 137.67 | 4.14 |
| 1 | -7 | 11  | 151.23 | 4.48 |
| 1 | -7 | 11  | 138.87 | 5.66 |
| 1 | -7 | 11  | 134.21 | 4.70 |
| 1 | -7 | 11  | 147.52 | 4.87 |
| 1 | -7 | 12  | 330.06 | 6.10 |
| 1 | -7 | 12  | 330.20 | 7.69 |
| 1 | -7 | 12  | 323.87 | 7.88 |
| 1 | -7 | 12  | 339.50 | 6.44 |
| 1 | -7 | 12  | 345.97 | 7.31 |
| 1 | -7 | 12  | 335.98 | 7.12 |
| 1 | -7 | 13  | 66.85  | 2.80 |
| 1 | -7 | 13  | 79.97  | 2.97 |
| 1 | -7 | 14  | 117.65 | 2.96 |
| 1 | -6 | -11 | 48.40  | 1.66 |
| 1 | -6 | -10 | 93.87  | 3.80 |
| 1 | -6 | -10 | 98.86  | 3.14 |
| 1 | -6 | -10 | 94.35  | 2.96 |
| 1 | -6 | -10 | 103.78 | 3.17 |
| 1 | -6 | -9  | 102.42 | 3.47 |
| 1 | -6 | -9  | 102.73 | 3.53 |
| 1 | -6 | -9  | 110.69 | 3.67 |
| 1 | -6 | -9  | 96.73  | 3.04 |
| 1 | -6 | -8  | 135.76 | 4.24 |
| 1 | -6 | -8  | 128.25 | 4.06 |
| 1 | -6 | -8  | 124.04 | 4.18 |
| 1 | -6 | -8  | 131.11 | 3.94 |
| 1 | -6 | -7  | 281.55 | 6.40 |
| 1 | -6 | -7  | 285.74 | 6.17 |
| 1 | -6 | -7  | 267.12 | 7.42 |
| 1 | -6 | -7  | 264.22 | 6.06 |
| 1 | -6 | -7  | 260.53 | 6.29 |
| 1 | -6 | -7  | 264.71 | 6.02 |
| 1 | -6 | -6  | 227.88 | 5.40 |
| 1 | -6 | -6  | 226.46 | 6.70 |

## CIF 31

|   |    |    |        |      |
|---|----|----|--------|------|
| 1 | -6 | -6 | 221.93 | 6.00 |
| 1 | -6 | -6 | 220.07 | 6.32 |
| 1 | -6 | -6 | 225.15 | 6.02 |
| 1 | -6 | -6 | 240.56 | 5.73 |
| 1 | -6 | -6 | 226.17 | 5.82 |
| 1 | -6 | -6 | 240.68 | 5.64 |
| 1 | -6 | -5 | 108.00 | 3.34 |
| 1 | -6 | -5 | 103.64 | 3.47 |
| 1 | -6 | -5 | 109.13 | 4.41 |
| 1 | -6 | -5 | 108.68 | 3.94 |
| 1 | -6 | -5 | 104.26 | 4.12 |
| 1 | -6 | -5 | 100.44 | 3.86 |
| 1 | -6 | -5 | 104.72 | 3.68 |
| 1 | -6 | -5 | 103.01 | 3.71 |
| 1 | -6 | -4 | 378.91 | 6.63 |
| 1 | -6 | -4 | 416.29 | 7.77 |
| 1 | -6 | -4 | 405.33 | 8.06 |
| 1 | -6 | -4 | 410.09 | 7.67 |
| 1 | -6 | -4 | 410.25 | 7.43 |
| 1 | -6 | -4 | 367.76 | 7.15 |
| 1 | -6 | -4 | 387.19 | 7.21 |
| 1 | -6 | -3 | 176.48 | 3.93 |
| 1 | -6 | -3 | 165.15 | 4.47 |
| 1 | -6 | -3 | 164.22 | 4.43 |
| 1 | -6 | -3 | 162.47 | 4.60 |
| 1 | -6 | -3 | 167.77 | 4.32 |
| 1 | -6 | -3 | 167.15 | 4.31 |
| 1 | -6 | -2 | 161.58 | 4.15 |
| 1 | -6 | -2 | 173.87 | 4.32 |
| 1 | -6 | -2 | 178.77 | 4.39 |
| 1 | -6 | -2 | 163.83 | 4.43 |
| 1 | -6 | -2 | 182.16 | 4.38 |
| 1 | -6 | -2 | 167.95 | 4.64 |
| 1 | -6 | -2 | 186.91 | 4.41 |
| 1 | -6 | -2 | 166.70 | 3.86 |
| 1 | -6 | -2 | 176.36 | 3.73 |
| 1 | -6 | -1 | 0.68   | 0.52 |
| 1 | -6 | -1 | 0.52   | 0.57 |
| 1 | -6 | -1 | 1.90   | 0.80 |
| 1 | -6 | -1 | 1.40   | 0.76 |
| 1 | -6 | -1 | 0.95   | 0.55 |

## CIF 31

|   |    |    |         |       |
|---|----|----|---------|-------|
| 1 | -6 | -1 | 0.75    | 0.55  |
| 1 | -6 | -1 | 0.14    | 0.43  |
| 1 | -6 | -1 | 2.24    | 0.79  |
| 1 | -6 | -1 | 1.84    | 0.77  |
| 1 | -6 | -1 | 0.71    | 0.72  |
| 1 | -6 | -1 | 1.48    | 0.61  |
| 1 | -6 | -1 | 1.17    | 0.71  |
| 1 | -6 | -1 | 0.67    | 0.60  |
| 1 | -6 | 0  | 156.34  | 3.77  |
| 1 | -6 | 0  | 157.53  | 4.11  |
| 1 | -6 | 0  | 155.87  | 3.90  |
| 1 | -6 | 0  | 153.48  | 3.95  |
| 1 | -6 | 0  | 165.43  | 3.77  |
| 1 | -6 | 0  | 169.58  | 3.94  |
| 1 | -6 | 0  | 160.89  | 3.44  |
| 1 | -6 | 0  | 158.43  | 3.92  |
| 1 | -6 | 0  | 157.15  | 4.20  |
| 1 | -6 | 0  | 168.18  | 4.20  |
| 1 | -6 | 0  | 162.08  | 3.53  |
| 1 | -6 | 0  | 163.34  | 3.79  |
| 1 | -6 | 0  | 171.88  | 4.28  |
| 1 | -6 | 0  | 146.98  | 3.68  |
| 1 | -6 | 0  | 146.53  | 3.61  |
| 1 | -6 | 0  | 159.07  | 3.76  |
| 1 | -6 | 1  | 834.28  | 10.47 |
| 1 | -6 | 1  | 774.16  | 10.21 |
| 1 | -6 | 1  | 795.61  | 10.37 |
| 1 | -6 | 1  | 781.64  | 9.84  |
| 1 | -6 | 1  | 778.92  | 9.52  |
| 1 | -6 | 1  | 805.83  | 10.18 |
| 1 | -6 | 1  | 756.64  | 9.44  |
| 1 | -6 | 1  | 791.64  | 10.31 |
| 1 | -6 | 1  | 813.65  | 10.91 |
| 1 | -6 | 1  | 744.49  | 10.34 |
| 1 | -6 | 1  | 720.20  | 10.40 |
| 1 | -6 | 1  | 840.30  | 9.89  |
| 1 | -6 | 1  | 818.36  | 10.65 |
| 1 | -6 | 1  | 690.33  | 9.82  |
| 1 | -6 | 2  | 1885.23 | 19.78 |
| 1 | -6 | 2  | 1865.12 | 19.45 |
| 1 | -6 | 2  | 1825.56 | 19.26 |

## CIF 31

|   |    |   |         |       |
|---|----|---|---------|-------|
| 1 | -6 | 2 | 1981.24 | 20.35 |
| 1 | -6 | 2 | 1921.48 | 19.87 |
| 1 | -6 | 2 | 1772.16 | 19.59 |
| 1 | -6 | 2 | 1874.12 | 18.42 |
| 1 | -6 | 2 | 1875.22 | 19.73 |
| 1 | -6 | 2 | 1668.68 | 19.33 |
| 1 | -6 | 3 | 2187.09 | 23.86 |
| 1 | -6 | 3 | 2495.78 | 23.83 |
| 1 | -6 | 3 | 2292.15 | 23.40 |
| 1 | -6 | 3 | 2315.73 | 23.93 |
| 1 | -6 | 3 | 2298.25 | 22.13 |
| 1 | -6 | 3 | 2274.25 | 23.77 |
| 1 | -6 | 3 | 2492.89 | 22.65 |
| 1 | -6 | 3 | 2370.46 | 24.56 |
| 1 | -6 | 4 | 66.56   | 2.88  |
| 1 | -6 | 4 | 67.50   | 2.48  |
| 1 | -6 | 4 | 73.31   | 2.66  |
| 1 | -6 | 4 | 76.54   | 2.66  |
| 1 | -6 | 4 | 77.39   | 2.94  |
| 1 | -6 | 4 | 70.51   | 2.81  |
| 1 | -6 | 4 | 73.11   | 2.04  |
| 1 | -6 | 4 | 65.76   | 2.70  |
| 1 | -6 | 4 | 80.98   | 2.35  |
| 1 | -6 | 4 | 72.14   | 2.47  |
| 1 | -6 | 4 | 75.85   | 2.96  |
| 1 | -6 | 5 | 614.64  | 9.38  |
| 1 | -6 | 5 | 603.23  | 8.65  |
| 1 | -6 | 5 | 613.49  | 9.00  |
| 1 | -6 | 5 | 612.69  | 9.40  |
| 1 | -6 | 5 | 591.92  | 9.21  |
| 1 | -6 | 5 | 577.19  | 8.17  |
| 1 | -6 | 5 | 582.73  | 9.42  |
| 1 | -6 | 6 | 6.45    | 1.15  |
| 1 | -6 | 6 | 7.86    | 1.08  |
| 1 | -6 | 6 | 6.44    | 1.07  |
| 1 | -6 | 6 | 7.89    | 1.13  |
| 1 | -6 | 6 | 5.56    | 1.16  |
| 1 | -6 | 6 | 7.97    | 0.90  |
| 1 | -6 | 6 | 5.73    | 1.34  |
| 1 | -6 | 7 | 1257.71 | 16.58 |
| 1 | -6 | 7 | 1289.52 | 15.75 |

## CIF 31

|   |    |     |         |       |
|---|----|-----|---------|-------|
| 1 | -6 | 7   | 1334.68 | 16.29 |
| 1 | -6 | 7   | 1295.89 | 16.05 |
| 1 | -6 | 7   | 1360.20 | 18.49 |
| 1 | -6 | 8   | 1533.46 | 18.90 |
| 1 | -6 | 8   | 1522.69 | 18.62 |
| 1 | -6 | 8   | 1523.15 | 18.01 |
| 1 | -6 | 8   | 1581.66 | 19.56 |
| 1 | -6 | 9   | 261.93  | 6.16  |
| 1 | -6 | 9   | 239.25  | 5.89  |
| 1 | -6 | 9   | 268.56  | 6.34  |
| 1 | -6 | 9   | 239.73  | 5.52  |
| 1 | -6 | 9   | 254.04  | 6.68  |
| 1 | -6 | 9   | 259.69  | 5.87  |
| 1 | -6 | 9   | 226.73  | 7.10  |
| 1 | -6 | 10  | 46.30   | 2.64  |
| 1 | -6 | 10  | 51.37   | 2.78  |
| 1 | -6 | 10  | 58.21   | 3.50  |
| 1 | -6 | 10  | 54.50   | 3.04  |
| 1 | -6 | 10  | 53.06   | 3.16  |
| 1 | -6 | 10  | 52.63   | 2.66  |
| 1 | -6 | 10  | 48.17   | 3.71  |
| 1 | -6 | 10  | 53.75   | 2.63  |
| 1 | -6 | 11  | 144.99  | 4.47  |
| 1 | -6 | 11  | 154.04  | 4.69  |
| 1 | -6 | 11  | 139.33  | 5.20  |
| 1 | -6 | 11  | 159.43  | 5.18  |
| 1 | -6 | 11  | 130.27  | 5.34  |
| 1 | -6 | 12  | 0.40    | 0.78  |
| 1 | -6 | 12  | 1.24    | 0.82  |
| 1 | -6 | 12  | 1.93    | 2.48  |
| 1 | -6 | 12  | 1.80    | 1.00  |
| 1 | -6 | 12  | 2.67    | 1.39  |
| 1 | -6 | 13  | 0.32    | 0.59  |
| 1 | -6 | 13  | 0.93    | 0.64  |
| 1 | -6 | 13  | -0.04   | 1.69  |
| 1 | -6 | 13  | 0.32    | 0.94  |
| 1 | -6 | 13  | 0.47    | 0.76  |
| 1 | -6 | 14  | 8.19    | 1.03  |
| 1 | -5 | -12 | -0.16   | 0.72  |
| 1 | -5 | -12 | 0.60    | 0.55  |
| 1 | -5 | -11 | 98.85   | 2.82  |

## CIF 31

|   |    |     |        |       |
|---|----|-----|--------|-------|
| 1 | -5 | -11 | 105.31 | 3.93  |
| 1 | -5 | -11 | 105.01 | 3.24  |
| 1 | -5 | -11 | 97.38  | 2.43  |
| 1 | -5 | -10 | 28.04  | 1.87  |
| 1 | -5 | -10 | 26.52  | 1.55  |
| 1 | -5 | -10 | 27.72  | 1.97  |
| 1 | -5 | -9  | 46.25  | 2.46  |
| 1 | -5 | -9  | 44.77  | 2.11  |
| 1 | -5 | -9  | 46.53  | 2.60  |
| 1 | -5 | -9  | 42.26  | 2.19  |
| 1 | -5 | -8  | 38.99  | 2.37  |
| 1 | -5 | -8  | 38.99  | 2.43  |
| 1 | -5 | -8  | 32.73  | 1.87  |
| 1 | -5 | -8  | 36.90  | 2.10  |
| 1 | -5 | -8  | 35.14  | 2.41  |
| 1 | -5 | -8  | 40.06  | 2.20  |
| 1 | -5 | -7  | 231.14 | 5.45  |
| 1 | -5 | -7  | 222.33 | 6.63  |
| 1 | -5 | -7  | 195.24 | 5.75  |
| 1 | -5 | -7  | 191.58 | 4.46  |
| 1 | -5 | -7  | 229.03 | 5.33  |
| 1 | -5 | -7  | 198.10 | 5.47  |
| 1 | -5 | -7  | 226.85 | 5.30  |
| 1 | -5 | -6  | 958.33 | 14.69 |
| 1 | -5 | -6  | 983.29 | 14.37 |
| 1 | -5 | -6  | 959.15 | 13.95 |
| 1 | -5 | -6  | 948.64 | 14.00 |
| 1 | -5 | -6  | 943.55 | 12.73 |
| 1 | -5 | -6  | 948.29 | 12.80 |
| 1 | -5 | -5  | 3.09   | 0.82  |
| 1 | -5 | -5  | 1.65   | 0.92  |
| 1 | -5 | -5  | 2.52   | 0.84  |
| 1 | -5 | -5  | 5.39   | 1.09  |
| 1 | -5 | -5  | 1.54   | 0.80  |
| 1 | -5 | -5  | 1.68   | 0.62  |
| 1 | -5 | -5  | 4.37   | 0.90  |
| 1 | -5 | -5  | 2.76   | 0.81  |
| 1 | -5 | -5  | 2.35   | 0.81  |
| 1 | -5 | -4  | 874.39 | 10.89 |
| 1 | -5 | -4  | 914.93 | 12.08 |
| 1 | -5 | -4  | 931.42 | 12.51 |



## CIF 31

|   |    |    |         |       |
|---|----|----|---------|-------|
| 1 | -5 | -4 | 883.31  | 11.91 |
| 1 | -5 | -4 | 904.04  | 11.11 |
| 1 | -5 | -4 | 942.65  | 11.48 |
| 1 | -5 | -4 | 898.18  | 11.40 |
| 1 | -5 | -3 | 128.37  | 3.55  |
| 1 | -5 | -3 | 121.63  | 3.07  |
| 1 | -5 | -3 | 127.10  | 3.22  |
| 1 | -5 | -3 | 135.15  | 3.21  |
| 1 | -5 | -3 | 136.36  | 3.42  |
| 1 | -5 | -3 | 119.35  | 3.59  |
| 1 | -5 | -3 | 144.73  | 3.55  |
| 1 | -5 | -3 | 140.49  | 3.62  |
| 1 | -5 | -3 | 146.03  | 3.58  |
| 1 | -5 | -2 | 3510.27 | 33.61 |
| 1 | -5 | -2 | 3796.72 | 32.92 |
| 1 | -5 | -2 | 3558.22 | 32.76 |
| 1 | -5 | -2 | 3765.90 | 33.32 |
| 1 | -5 | -2 | 3634.19 | 33.67 |
| 1 | -5 | -2 | 3761.47 | 34.35 |
| 1 | -5 | -2 | 3464.27 | 33.26 |
| 1 | -5 | -2 | 3727.62 | 34.51 |
| 1 | -5 | -2 | 3700.07 | 32.46 |
| 1 | -5 | -1 | 684.22  | 7.53  |
| 1 | -5 | -1 | 606.80  | 7.97  |
| 1 | -5 | -1 | 624.64  | 7.68  |
| 1 | -5 | -1 | 488.50  | 7.54  |
| 1 | -5 | -1 | 524.38  | 7.20  |
| 1 | -5 | -1 | 650.74  | 8.09  |
| 1 | -5 | -1 | 640.53  | 8.51  |
| 1 | -5 | -1 | 644.01  | 8.63  |
| 1 | -5 | -1 | 626.76  | 7.68  |
| 1 | -5 | 0  | 3339.12 | 29.67 |
| 1 | -5 | 0  | 3280.96 | 29.50 |
| 1 | -5 | 0  | 3301.84 | 29.20 |
| 1 | -5 | 0  | 3328.92 | 29.82 |
| 1 | -5 | 0  | 3299.53 | 29.17 |
| 1 | -5 | 0  | 3434.16 | 29.93 |
| 1 | -5 | 0  | 3395.34 | 30.47 |
| 1 | -5 | 0  | 3042.74 | 30.02 |
| 1 | -5 | 0  | 3347.32 | 30.32 |
| 1 | -5 | 0  | 3189.41 | 29.23 |

## CIF 31

|   |    |   |         |       |
|---|----|---|---------|-------|
| 1 | -5 | 0 | 3231.25 | 28.29 |
| 1 | -5 | 1 | 1426.66 | 15.44 |
| 1 | -5 | 1 | 1474.46 | 15.28 |
| 1 | -5 | 1 | 1588.20 | 15.54 |
| 1 | -5 | 1 | 1574.59 | 16.07 |
| 1 | -5 | 1 | 1272.87 | 15.19 |
| 1 | -5 | 1 | 1648.15 | 15.03 |
| 1 | -5 | 1 | 1376.32 | 14.67 |
| 1 | -5 | 2 | 554.55  | 8.00  |
| 1 | -5 | 2 | 570.28  | 7.74  |
| 1 | -5 | 2 | 610.20  | 8.10  |
| 1 | -5 | 2 | 589.42  | 7.13  |
| 1 | -5 | 2 | 615.07  | 7.37  |
| 1 | -5 | 3 | 122.19  | 3.29  |
| 1 | -5 | 3 | 113.48  | 2.96  |
| 1 | -5 | 3 | 125.95  | 3.05  |
| 1 | -5 | 3 | 105.10  | 2.74  |
| 1 | -5 | 3 | 122.44  | 3.34  |
| 1 | -5 | 3 | 127.30  | 3.29  |
| 1 | -5 | 3 | 130.57  | 3.31  |
| 1 | -5 | 3 | 133.90  | 2.58  |
| 1 | -5 | 3 | 125.60  | 2.68  |
| 1 | -5 | 3 | 154.71  | 3.44  |
| 1 | -5 | 4 | 25.78   | 1.48  |
| 1 | -5 | 4 | 23.61   | 1.33  |
| 1 | -5 | 4 | 20.16   | 1.35  |
| 1 | -5 | 4 | 19.27   | 1.41  |
| 1 | -5 | 4 | 25.65   | 1.60  |
| 1 | -5 | 4 | 23.85   | 0.97  |
| 1 | -5 | 4 | 24.76   | 1.18  |
| 1 | -5 | 4 | 25.00   | 1.55  |
| 1 | -5 | 5 | 1625.67 | 18.05 |
| 1 | -5 | 5 | 1638.32 | 17.48 |
| 1 | -5 | 5 | 1625.92 | 16.90 |
| 1 | -5 | 5 | 1585.42 | 17.63 |
| 1 | -5 | 5 | 1650.12 | 18.01 |
| 1 | -5 | 5 | 1665.44 | 16.29 |
| 1 | -5 | 6 | 17.40   | 1.48  |
| 1 | -5 | 6 | 15.16   | 1.31  |
| 1 | -5 | 6 | 14.41   | 1.05  |
| 1 | -5 | 6 | 19.75   | 1.46  |

## CIF 31

|   |    |     |         |       |
|---|----|-----|---------|-------|
| 1 | -5 | 6   | 11.88   | 1.35  |
| 1 | -5 | 6   | 14.07   | 1.03  |
| 1 | -5 | 7   | 225.08  | 5.35  |
| 1 | -5 | 7   | 218.62  | 5.14  |
| 1 | -5 | 7   | 241.91  | 5.08  |
| 1 | -5 | 7   | 230.09  | 5.55  |
| 1 | -5 | 7   | 241.33  | 5.97  |
| 1 | -5 | 8   | 22.01   | 1.77  |
| 1 | -5 | 8   | 21.02   | 1.75  |
| 1 | -5 | 8   | 19.44   | 1.41  |
| 1 | -5 | 8   | 23.76   | 2.02  |
| 1 | -5 | 9   | 840.14  | 12.02 |
| 1 | -5 | 9   | 863.73  | 12.21 |
| 1 | -5 | 10  | 2773.60 | 28.53 |
| 1 | -5 | 10  | 2803.04 | 28.21 |
| 1 | -5 | 11  | 49.59   | 2.79  |
| 1 | -5 | 11  | 48.27   | 3.08  |
| 1 | -5 | 11  | 45.78   | 3.01  |
| 1 | -5 | 11  | 46.65   | 3.00  |
| 1 | -5 | 11  | 49.29   | 3.41  |
| 1 | -5 | 12  | 3.45    | 0.98  |
| 1 | -5 | 12  | 3.90    | 1.93  |
| 1 | -5 | 12  | 2.76    | 0.97  |
| 1 | -5 | 12  | 3.48    | 2.09  |
| 1 | -5 | 12  | 4.25    | 1.26  |
| 1 | -5 | 12  | 4.74    | 1.26  |
| 1 | -5 | 13  | 8.81    | 1.15  |
| 1 | -5 | 13  | 9.81    | 1.18  |
| 1 | -5 | 13  | 7.52    | 1.90  |
| 1 | -5 | 13  | 7.61    | 1.27  |
| 1 | -4 | -13 | 0.96    | 0.65  |
| 1 | -4 | -13 | 0.85    | 0.50  |
| 1 | -4 | -13 | 0.82    | 0.44  |
| 1 | -4 | -12 | 33.64   | 2.22  |
| 1 | -4 | -12 | 36.84   | 1.87  |
| 1 | -4 | -12 | 33.00   | 1.51  |
| 1 | -4 | -12 | 35.24   | 1.85  |
| 1 | -4 | -11 | 270.94  | 5.27  |
| 1 | -4 | -11 | 270.99  | 6.93  |
| 1 | -4 | -11 | 275.52  | 5.39  |
| 1 | -4 | -10 | 495.21  | 8.27  |

## CIF 31

|   |    |     |        |       |
|---|----|-----|--------|-------|
| 1 | -4 | -10 | 503.71 | 8.69  |
| 1 | -4 | -10 | 486.36 | 8.06  |
| 1 | -4 | -10 | 495.37 | 9.06  |
| 1 | -4 | -9  | 963.11 | 13.02 |
| 1 | -4 | -9  | 985.86 | 13.33 |
| 1 | -4 | -9  | 939.70 | 12.49 |
| 1 | -4 | -9  | 924.60 | 12.17 |
| 1 | -4 | -9  | 921.23 | 13.64 |
| 1 | -4 | -8  | 790.81 | 11.41 |
| 1 | -4 | -8  | 721.24 | 10.49 |
| 1 | -4 | -8  | 736.89 | 10.36 |
| 1 | -4 | -8  | 802.13 | 10.95 |
| 1 | -4 | -8  | 823.38 | 12.13 |
| 1 | -4 | -7  | 721.85 | 12.28 |
| 1 | -4 | -7  | 660.17 | 10.70 |
| 1 | -4 | -7  | 783.42 | 10.95 |
| 1 | -4 | -7  | 698.11 | 11.53 |
| 1 | -4 | -7  | 683.51 | 9.71  |
| 1 | -4 | -7  | 727.02 | 10.02 |
| 1 | -4 | -7  | 750.36 | 10.28 |
| 1 | -4 | -7  | 757.29 | 11.24 |
| 1 | -4 | -6  | 16.25  | 1.59  |
| 1 | -4 | -6  | 18.47  | 1.46  |
| 1 | -4 | -6  | 16.49  | 1.59  |
| 1 | -4 | -6  | 19.86  | 1.67  |
| 1 | -4 | -6  | 18.64  | 1.51  |
| 1 | -4 | -6  | 18.51  | 1.66  |
| 1 | -4 | -6  | 16.66  | 1.24  |
| 1 | -4 | -6  | 18.33  | 1.39  |
| 1 | -4 | -6  | 16.67  | 1.50  |
| 1 | -4 | -5  | 371.36 | 7.32  |
| 1 | -4 | -5  | 382.98 | 7.14  |
| 1 | -4 | -5  | 381.59 | 6.94  |
| 1 | -4 | -5  | 389.23 | 6.61  |
| 1 | -4 | -5  | 390.12 | 6.57  |
| 1 | -4 | -5  | 376.93 | 6.21  |
| 1 | -4 | -5  | 374.37 | 6.48  |
| 1 | -4 | -5  | 373.21 | 6.66  |
| 1 | -4 | -4  | 55.43  | 2.30  |
| 1 | -4 | -4  | 56.87  | 2.39  |
| 1 | -4 | -4  | 55.46  | 2.27  |

## CIF 31

|   |    |    |         |       |
|---|----|----|---------|-------|
| 1 | -4 | -4 | 51.91   | 2.01  |
| 1 | -4 | -4 | 53.91   | 1.69  |
| 1 | -4 | -4 | 53.93   | 2.01  |
| 1 | -4 | -3 | 255.89  | 4.75  |
| 1 | -4 | -3 | 268.32  | 4.44  |
| 1 | -4 | -3 | 250.74  | 4.41  |
| 1 | -4 | -3 | 243.50  | 4.05  |
| 1 | -4 | -3 | 272.13  | 4.38  |
| 1 | -4 | -3 | 257.78  | 4.51  |
| 1 | -4 | -3 | 263.16  | 3.52  |
| 1 | -4 | -2 | 202.73  | 3.90  |
| 1 | -4 | -2 | 209.72  | 3.61  |
| 1 | -4 | -2 | 208.68  | 3.63  |
| 1 | -4 | -2 | 202.93  | 3.56  |
| 1 | -4 | -2 | 205.78  | 3.78  |
| 1 | -4 | -2 | 217.32  | 3.79  |
| 1 | -4 | -2 | 204.66  | 3.21  |
| 1 | -4 | -1 | 719.55  | 6.97  |
| 1 | -4 | -1 | 709.44  | 7.86  |
| 1 | -4 | -1 | 832.35  | 8.66  |
| 1 | -4 | -1 | 708.95  | 7.96  |
| 1 | -4 | -1 | 716.57  | 8.08  |
| 1 | -4 | -1 | 669.03  | 8.22  |
| 1 | -4 | -1 | 733.00  | 8.61  |
| 1 | -4 | -1 | 594.13  | 7.02  |
| 1 | -4 | 0  | 5164.69 | 46.69 |
| 1 | -4 | 0  | 5449.26 | 46.94 |
| 1 | -4 | 0  | 5579.19 | 46.87 |
| 1 | -4 | 0  | 5491.08 | 47.23 |
| 1 | -4 | 0  | 5028.38 | 46.92 |
| 1 | -4 | 0  | 5977.95 | 46.28 |
| 1 | -4 | 1  | 5.84    | 0.75  |
| 1 | -4 | 1  | 3.45    | 0.58  |
| 1 | -4 | 1  | 4.75    | 0.47  |
| 1 | -4 | 1  | 4.97    | 0.72  |
| 1 | -4 | 1  | 4.83    | 0.67  |
| 1 | -4 | 1  | 3.77    | 0.53  |
| 1 | -4 | 2  | 260.14  | 4.34  |
| 1 | -4 | 2  | 270.40  | 4.20  |
| 1 | -4 | 2  | 277.84  | 3.89  |
| 1 | -4 | 2  | 283.80  | 4.47  |

## CIF 31

|   |    |    |         |       |
|---|----|----|---------|-------|
| 1 | -4 | 2  | 265.36  | 3.64  |
| 1 | -4 | 2  | 267.74  | 3.74  |
| 1 | -4 | 3  | 872.19  | 9.36  |
| 1 | -4 | 3  | 871.20  | 9.33  |
| 1 | -4 | 3  | 790.80  | 9.68  |
| 1 | -4 | 3  | 812.69  | 9.68  |
| 1 | -4 | 3  | 862.85  | 8.30  |
| 1 | -4 | 3  | 812.27  | 8.61  |
| 1 | -4 | 4  | 179.61  | 3.75  |
| 1 | -4 | 4  | 176.92  | 2.35  |
| 1 | -4 | 4  | 169.41  | 3.49  |
| 1 | -4 | 4  | 169.73  | 3.22  |
| 1 | -4 | 4  | 173.61  | 3.51  |
| 1 | -4 | 4  | 163.34  | 3.50  |
| 1 | -4 | 4  | 158.75  | 3.56  |
| 1 | -4 | 4  | 163.79  | 2.25  |
| 1 | -4 | 4  | 177.68  | 3.02  |
| 1 | -4 | 5  | 963.96  | 11.19 |
| 1 | -4 | 5  | 884.39  | 10.13 |
| 1 | -4 | 5  | 909.66  | 10.86 |
| 1 | -4 | 5  | 948.16  | 10.16 |
| 1 | -4 | 6  | 168.47  | 3.92  |
| 1 | -4 | 6  | 158.27  | 3.53  |
| 1 | -4 | 6  | 156.54  | 3.12  |
| 1 | -4 | 6  | 167.70  | 4.14  |
| 1 | -4 | 6  | 170.42  | 3.76  |
| 1 | -4 | 6  | 162.68  | 3.45  |
| 1 | -4 | 7  | 1073.67 | 13.20 |
| 1 | -4 | 7  | 1071.30 | 12.80 |
| 1 | -4 | 8  | 253.66  | 5.48  |
| 1 | -4 | 8  | 269.63  | 5.49  |
| 1 | -4 | 8  | 253.75  | 5.19  |
| 1 | -4 | 9  | 63.21   | 2.58  |
| 1 | -4 | 9  | 69.89   | 2.88  |
| 1 | -4 | 9  | 77.26   | 3.14  |
| 1 | -4 | 9  | 67.97   | 2.72  |
| 1 | -4 | 9  | 73.12   | 3.69  |
| 1 | -4 | 10 | 736.62  | 10.87 |
| 1 | -4 | 10 | 744.17  | 11.55 |
| 1 | -4 | 11 | 442.79  | 9.41  |
| 1 | -4 | 11 | 443.71  | 9.73  |

## CIF 31

|   |    |     |        |       |
|---|----|-----|--------|-------|
| 1 | -4 | 12  | 746.07 | 12.45 |
| 1 | -4 | 12  | 730.90 | 12.59 |
| 1 | -4 | 13  | 11.58  | 1.34  |
| 1 | -4 | 13  | 12.13  | 1.69  |
| 1 | -4 | 13  | 11.92  | 1.47  |
| 1 | -4 | 13  | 14.36  | 1.62  |
| 1 | -4 | 14  | 21.17  | 1.36  |
| 1 | -4 | 14  | 20.75  | 1.55  |
| 1 | -3 | -14 | 0.83   | 0.31  |
| 1 | -3 | -13 | 12.26  | 1.35  |
| 1 | -3 | -13 | 13.25  | 1.12  |
| 1 | -3 | -13 | 13.18  | 1.03  |
| 1 | -3 | -13 | 14.56  | 1.19  |
| 1 | -3 | -12 | 101.52 | 3.93  |
| 1 | -3 | -12 | 99.57  | 3.28  |
| 1 | -3 | -12 | 99.24  | 3.15  |
| 1 | -3 | -12 | 104.09 | 3.52  |
| 1 | -3 | -11 | 682.04 | 9.42  |
| 1 | -3 | -11 | 725.53 | 10.64 |
| 1 | -3 | -11 | 724.80 | 10.38 |
| 1 | -3 | -11 | 651.77 | 10.77 |
| 1 | -3 | -11 | 643.82 | 11.82 |
| 1 | -3 | -10 | 22.76  | 1.71  |
| 1 | -3 | -10 | 23.06  | 1.93  |
| 1 | -3 | -10 | 22.19  | 2.92  |
| 1 | -3 | -10 | 26.83  | 1.95  |
| 1 | -3 | -10 | 26.56  | 2.17  |
| 1 | -3 | -9  | 86.99  | 3.18  |
| 1 | -3 | -9  | 85.26  | 3.35  |
| 1 | -3 | -9  | 84.31  | 3.81  |
| 1 | -3 | -9  | 78.15  | 3.59  |
| 1 | -3 | -9  | 85.13  | 2.95  |
| 1 | -3 | -9  | 85.72  | 3.57  |
| 1 | -3 | -8  | 131.00 | 3.81  |
| 1 | -3 | -8  | 118.48 | 3.78  |
| 1 | -3 | -8  | 125.37 | 4.04  |
| 1 | -3 | -8  | 117.44 | 3.25  |
| 1 | -3 | -8  | 127.31 | 4.15  |
| 1 | -3 | -7  | 551.77 | 9.22  |
| 1 | -3 | -7  | 517.39 | 9.62  |
| 1 | -3 | -7  | 536.30 | 9.49  |

## CIF 31

|   |    |    |         |       |
|---|----|----|---------|-------|
| 1 | -3 | -7 | 521.35  | 8.32  |
| 1 | -3 | -7 | 540.27  | 9.11  |
| 1 | -3 | -7 | 560.88  | 7.80  |
| 1 | -3 | -7 | 519.42  | 8.65  |
| 1 | -3 | -6 | 393.33  | 7.26  |
| 1 | -3 | -6 | 362.08  | 7.36  |
| 1 | -3 | -6 | 388.88  | 7.32  |
| 1 | -3 | -6 | 365.16  | 7.04  |
| 1 | -3 | -6 | 376.53  | 7.05  |
| 1 | -3 | -6 | 385.45  | 6.91  |
| 1 | -3 | -6 | 384.73  | 6.44  |
| 1 | -3 | -6 | 395.40  | 6.05  |
| 1 | -3 | -6 | 360.43  | 6.58  |
| 1 | -3 | -5 | 5067.30 | 45.88 |
| 1 | -3 | -5 | 5390.57 | 47.27 |
| 1 | -3 | -5 | 5697.02 | 48.82 |
| 1 | -3 | -5 | 5301.75 | 48.03 |
| 1 | -3 | -5 | 5684.45 | 48.52 |
| 1 | -3 | -5 | 4931.13 | 47.49 |
| 1 | -3 | -5 | 5410.40 | 47.62 |
| 1 | -3 | -5 | 5403.72 | 46.82 |
| 1 | -3 | -5 | 5311.49 | 46.35 |
| 1 | -3 | -4 | 431.47  | 5.54  |
| 1 | -3 | -4 | 445.17  | 6.31  |
| 1 | -3 | -4 | 449.40  | 6.39  |
| 1 | -3 | -4 | 436.93  | 5.92  |
| 1 | -3 | -4 | 441.40  | 5.18  |
| 1 | -3 | -4 | 435.69  | 5.91  |
| 1 | -3 | -3 | 2528.61 | 21.93 |
| 1 | -3 | -3 | 2495.68 | 22.04 |
| 1 | -3 | -3 | 2580.61 | 23.42 |
| 1 | -3 | -3 | 2606.78 | 23.02 |
| 1 | -3 | -3 | 2456.35 | 22.36 |
| 1 | -3 | -3 | 2499.70 | 22.20 |
| 1 | -3 | -3 | 2464.63 | 22.61 |
| 1 | -3 | -3 | 2503.84 | 21.12 |
| 1 | -3 | -2 | 14.86   | 0.66  |
| 1 | -3 | -2 | 12.96   | 0.87  |
| 1 | -3 | -2 | 13.91   | 0.76  |
| 1 | -3 | -2 | 14.37   | 0.80  |
| 1 | -3 | -2 | 15.73   | 1.00  |



## CIF 31

|   |    |    |         |       |
|---|----|----|---------|-------|
| 1 | -3 | -2 | 13.61   | 0.82  |
| 1 | -3 | -2 | 15.10   | 0.66  |
| 1 | -3 | 0  | 3693.44 | 31.96 |
| 1 | -3 | 0  | 3675.57 | 31.98 |
| 1 | -3 | 0  | 3890.71 | 32.14 |
| 1 | -3 | 0  | 3555.56 | 30.93 |
| 1 | -3 | 0  | 3729.18 | 32.33 |
| 1 | -3 | 0  | 3757.88 | 31.76 |
| 1 | -3 | 1  | 1158.10 | 11.03 |
| 1 | -3 | 1  | 1128.17 | 10.46 |
| 1 | -3 | 1  | 1192.95 | 10.44 |
| 1 | -3 | 1  | 1061.10 | 11.07 |
| 1 | -3 | 1  | 1092.09 | 11.01 |
| 1 | -3 | 1  | 1102.66 | 10.35 |
| 1 | -3 | 2  | 1110.87 | 10.57 |
| 1 | -3 | 2  | 1092.77 | 10.47 |
| 1 | -3 | 2  | 1077.28 | 10.81 |
| 1 | -3 | 2  | 1100.00 | 9.77  |
| 1 | -3 | 3  | 2675.34 | 24.35 |
| 1 | -3 | 3  | 2721.55 | 23.85 |
| 1 | -3 | 3  | 2689.88 | 24.23 |
| 1 | -3 | 3  | 2676.76 | 24.27 |
| 1 | -3 | 3  | 2675.21 | 22.62 |
| 1 | -3 | 4  | 1124.50 | 11.76 |
| 1 | -3 | 4  | 1176.26 | 10.77 |
| 1 | -3 | 4  | 1142.61 | 11.09 |
| 1 | -3 | 4  | 1158.89 | 11.96 |
| 1 | -3 | 4  | 1135.46 | 11.66 |
| 1 | -3 | 5  | 81.66   | 2.29  |
| 1 | -3 | 5  | 86.85   | 1.94  |
| 1 | -3 | 5  | 77.06   | 1.77  |
| 1 | -3 | 5  | 67.61   | 2.31  |
| 1 | -3 | 5  | 70.18   | 2.01  |
| 1 | -3 | 5  | 76.34   | 2.10  |
| 1 | -3 | 6  | 19.88   | 1.21  |
| 1 | -3 | 6  | 16.66   | 0.76  |
| 1 | -3 | 6  | 18.81   | 1.10  |
| 1 | -3 | 6  | 16.50   | 1.14  |
| 1 | -3 | 7  | 288.66  | 5.14  |
| 1 | -3 | 7  | 307.85  | 5.94  |
| 1 | -3 | 7  | 269.18  | 4.58  |

## CIF 31

|   |    |     |        |       |
|---|----|-----|--------|-------|
| 1 | -3 | 7   | 276.98 | 5.22  |
| 1 | -3 | 7   | 314.18 | 5.90  |
| 1 | -3 | 8   | 88.63  | 2.79  |
| 1 | -3 | 8   | 87.87  | 3.38  |
| 1 | -3 | 8   | 109.39 | 3.53  |
| 1 | -3 | 8   | 104.86 | 3.31  |
| 1 | -3 | 8   | 110.16 | 3.53  |
| 1 | -3 | 9   | 5.70   | 1.13  |
| 1 | -3 | 9   | 5.90   | 1.13  |
| 1 | -3 | 10  | 267.59 | 6.50  |
| 1 | -3 | 10  | 260.53 | 5.98  |
| 1 | -3 | 11  | 535.81 | 10.39 |
| 1 | -3 | 11  | 515.53 | 9.98  |
| 1 | -3 | 12  | 133.10 | 4.56  |
| 1 | -3 | 12  | 124.31 | 4.67  |
| 1 | -3 | 13  | 61.31  | 2.77  |
| 1 | -3 | 14  | 6.80   | 0.86  |
| 1 | -2 | -14 | 355.87 | 5.18  |
| 1 | -2 | -14 | 352.61 | 5.47  |
| 1 | -2 | -13 | 98.69  | 2.89  |
| 1 | -2 | -13 | 96.49  | 3.00  |
| 1 | -2 | -13 | 103.41 | 3.35  |
| 1 | -2 | -12 | 120.88 | 4.46  |
| 1 | -2 | -12 | 120.40 | 3.72  |
| 1 | -2 | -12 | 123.64 | 3.80  |
| 1 | -2 | -12 | 113.84 | 4.05  |
| 1 | -2 | -11 | 422.52 | 9.26  |
| 1 | -2 | -11 | 437.68 | 8.05  |
| 1 | -2 | -11 | 426.18 | 8.48  |
| 1 | -2 | -10 | 207.44 | 5.24  |
| 1 | -2 | -10 | 188.78 | 6.29  |
| 1 | -2 | -10 | 192.43 | 5.12  |
| 1 | -2 | -10 | 206.21 | 5.67  |
| 1 | -2 | -9  | 79.80  | 3.62  |
| 1 | -2 | -9  | 93.05  | 3.06  |
| 1 | -2 | -9  | 95.54  | 3.38  |
| 1 | -2 | -9  | 88.33  | 5.22  |
| 1 | -2 | -9  | 99.87  | 4.32  |
| 1 | -2 | -9  | 88.83  | 3.31  |
| 1 | -2 | -9  | 86.52  | 3.53  |
| 1 | -2 | -8  | 920.65 | 12.85 |

## CIF 31

|   |    |    |         |       |
|---|----|----|---------|-------|
| 1 | -2 | -8 | 913.77  | 12.43 |
| 1 | -2 | -7 | 602.38  | 9.62  |
| 1 | -2 | -7 | 574.19  | 9.22  |
| 1 | -2 | -7 | 561.87  | 8.87  |
| 1 | -2 | -7 | 557.48  | 8.91  |
| 1 | -2 | -7 | 549.72  | 8.23  |
| 1 | -2 | -7 | 586.95  | 7.39  |
| 1 | -2 | -7 | 525.27  | 8.41  |
| 1 | -2 | -6 | 266.99  | 5.53  |
| 1 | -2 | -6 | 232.41  | 4.75  |
| 1 | -2 | -6 | 243.74  | 5.55  |
| 1 | -2 | -6 | 261.52  | 5.45  |
| 1 | -2 | -6 | 270.02  | 5.41  |
| 1 | -2 | -6 | 284.45  | 4.37  |
| 1 | -2 | -6 | 272.86  | 5.25  |
| 1 | -2 | -5 | 3014.92 | 25.64 |
| 1 | -2 | -5 | 3029.09 | 26.81 |
| 1 | -2 | -5 | 3064.89 | 26.60 |
| 1 | -2 | -5 | 3059.27 | 26.06 |
| 1 | -2 | -5 | 3033.22 | 24.93 |
| 1 | -2 | -4 | 6.52    | 0.63  |
| 1 | -2 | -4 | 6.87    | 0.77  |
| 1 | -2 | -4 | 5.51    | 0.67  |
| 1 | -2 | -4 | 5.54    | 0.64  |
| 1 | -2 | -4 | 5.53    | 0.63  |
| 1 | -2 | -4 | 6.04    | 0.59  |
| 1 | -2 | -3 | 7466.01 | 61.30 |
| 1 | -2 | -3 | 7525.50 | 61.92 |
| 1 | -2 | -3 | 7645.93 | 61.63 |
| 1 | -2 | -2 | 40.79   | 0.83  |
| 1 | -2 | -2 | 42.41   | 1.09  |
| 1 | -2 | -2 | 50.36   | 1.46  |
| 1 | -2 | -2 | 41.46   | 1.44  |
| 1 | -2 | -2 | 52.82   | 1.16  |
| 1 | -2 | -2 | 41.60   | 1.33  |
| 1 | -2 | -1 | 650.91  | 6.15  |
| 1 | -2 | -1 | 657.14  | 7.38  |
| 1 | -2 | -1 | 654.18  | 6.33  |
| 1 | -2 | 0  | 28.38   | 0.82  |
| 1 | -2 | 0  | 26.48   | 0.83  |
| 1 | -2 | 0  | 28.78   | 1.23  |

## CIF 31

|   |    |    |         |       |
|---|----|----|---------|-------|
| 1 | -2 | 0  | 28.76   | 0.89  |
| 1 | -2 | 2  | 4054.60 | 34.01 |
| 1 | -2 | 2  | 4157.12 | 36.06 |
| 1 | -2 | 3  | 0.47    | 0.31  |
| 1 | -2 | 3  | 1.11    | 0.29  |
| 1 | -2 | 3  | 1.21    | 0.22  |
| 1 | -2 | 3  | 0.89    | 0.31  |
| 1 | -2 | 4  | 1478.28 | 13.06 |
| 1 | -2 | 4  | 1599.50 | 13.03 |
| 1 | -2 | 4  | 1227.66 | 10.99 |
| 1 | -2 | 4  | 1471.29 | 12.09 |
| 1 | -2 | 4  | 1363.45 | 11.76 |
| 1 | -2 | 4  | 1414.16 | 12.72 |
| 1 | -2 | 4  | 1353.11 | 12.32 |
| 1 | -2 | 5  | 252.72  | 3.92  |
| 1 | -2 | 5  | 250.03  | 2.95  |
| 1 | -2 | 5  | 247.90  | 3.94  |
| 1 | -2 | 5  | 270.41  | 4.49  |
| 1 | -2 | 5  | 265.98  | 3.12  |
| 1 | -2 | 5  | 242.61  | 3.66  |
| 1 | -2 | 5  | 249.13  | 3.79  |
| 1 | -2 | 6  | 25.09   | 1.20  |
| 1 | -2 | 6  | 24.53   | 1.44  |
| 1 | -2 | 6  | 23.65   | 0.81  |
| 1 | -2 | 6  | 22.24   | 1.18  |
| 1 | -2 | 7  | 26.58   | 1.33  |
| 1 | -2 | 7  | 27.91   | 1.70  |
| 1 | -2 | 7  | 17.60   | 0.95  |
| 1 | -2 | 7  | 20.17   | 1.29  |
| 1 | -2 | 8  | 2731.32 | 29.17 |
| 1 | -2 | 8  | 2737.58 | 27.66 |
| 1 | -2 | 8  | 2969.86 | 29.11 |
| 1 | -2 | 8  | 2974.18 | 29.31 |
| 1 | -2 | 8  | 3171.15 | 28.92 |
| 1 | -2 | 9  | 6.46    | 1.20  |
| 1 | -2 | 9  | 4.88    | 1.01  |
| 1 | -2 | 9  | 1.57    | 0.94  |
| 1 | -2 | 9  | 3.16    | 0.98  |
| 1 | -2 | 10 | 758.61  | 12.15 |
| 1 | -2 | 10 | 765.64  | 12.18 |
| 1 | -2 | 10 | 789.49  | 12.04 |

## CIF 31

|   |    |     |         |       |
|---|----|-----|---------|-------|
| 1 | -2 | 11  | 95.95   | 3.91  |
| 1 | -2 | 11  | 96.96   | 4.11  |
| 1 | -2 | 12  | 157.46  | 4.92  |
| 1 | -2 | 12  | 183.02  | 5.00  |
| 1 | -2 | 13  | 1.25    | 0.80  |
| 1 | -2 | 14  | 15.76   | 1.19  |
| 1 | -1 | -15 | 86.24   | 1.95  |
| 1 | -1 | -15 | 83.85   | 1.95  |
| 1 | -1 | -14 | 54.28   | 2.11  |
| 1 | -1 | -14 | 55.60   | 2.25  |
| 1 | -1 | -13 | 190.61  | 4.97  |
| 1 | -1 | -13 | 206.40  | 4.37  |
| 1 | -1 | -13 | 186.76  | 4.48  |
| 1 | -1 | -13 | 204.61  | 4.84  |
| 1 | -1 | -13 | 180.81  | 4.85  |
| 1 | -1 | -12 | 456.94  | 8.96  |
| 1 | -1 | -12 | 442.62  | 7.56  |
| 1 | -1 | -12 | 422.35  | 7.63  |
| 1 | -1 | -12 | 438.80  | 8.55  |
| 1 | -1 | -11 | 111.18  | 4.42  |
| 1 | -1 | -11 | 112.57  | 3.72  |
| 1 | -1 | -11 | 98.82   | 4.77  |
| 1 | -1 | -11 | 106.80  | 3.68  |
| 1 | -1 | -11 | 105.35  | 4.17  |
| 1 | -1 | -10 | 25.15   | 2.22  |
| 1 | -1 | -10 | 27.38   | 1.91  |
| 1 | -1 | -10 | 23.53   | 2.36  |
| 1 | -1 | -10 | 21.63   | 1.76  |
| 1 | -1 | -10 | 22.86   | 4.42  |
| 1 | -1 | -10 | 26.68   | 2.14  |
| 1 | -1 | -9  | 1083.62 | 15.66 |
| 1 | -1 | -9  | 1131.52 | 15.15 |
| 1 | -1 | -9  | 1055.84 | 15.20 |
| 1 | -1 | -9  | 1122.65 | 16.92 |
| 1 | -1 | -9  | 1172.76 | 15.23 |
| 1 | -1 | -9  | 1085.43 | 13.94 |
| 1 | -1 | -9  | 1122.23 | 14.81 |
| 1 | -1 | -8  | 307.44  | 6.46  |
| 1 | -1 | -8  | 301.66  | 7.07  |
| 1 | -1 | -8  | 258.27  | 5.88  |
| 1 | -1 | -8  | 272.13  | 6.32  |

## CIF 31

|   |    |    |         |      |
|---|----|----|---------|------|
| 1 | -1 | -8 | 273.75  | 5.78 |
| 1 | -1 | -7 | 11.38   | 1.14 |
| 1 | -1 | -7 | 13.31   | 1.40 |
| 1 | -1 | -7 | 10.72   | 1.21 |
| 1 | -1 | -7 | 11.89   | 1.30 |
| 1 | -1 | -7 | 13.60   | 1.32 |
| 1 | -1 | -7 | 8.03    | 0.95 |
| 1 | -1 | -7 | 12.46   | 0.82 |
| 1 | -1 | -7 | 14.39   | 1.26 |
| 1 | -1 | -7 | 12.91   | 1.14 |
| 1 | -1 | -6 | 127.10  | 3.28 |
| 1 | -1 | -6 | 120.87  | 3.38 |
| 1 | -1 | -6 | 120.18  | 3.35 |
| 1 | -1 | -6 | 114.75  | 2.94 |
| 1 | -1 | -6 | 116.90  | 2.95 |
| 1 | -1 | -6 | 116.06  | 2.38 |
| 1 | -1 | -5 | 680.84  | 8.46 |
| 1 | -1 | -5 | 692.35  | 8.22 |
| 1 | -1 | -5 | 722.76  | 8.99 |
| 1 | -1 | -5 | 702.00  | 8.85 |
| 1 | -1 | -5 | 703.84  | 8.81 |
| 1 | -1 | -5 | 661.13  | 8.04 |
| 1 | -1 | -4 | 83.66   | 2.08 |
| 1 | -1 | -4 | 80.13   | 1.50 |
| 1 | -1 | -4 | 76.70   | 1.97 |
| 1 | -1 | -4 | 84.70   | 2.24 |
| 1 | -1 | -4 | 84.03   | 2.22 |
| 1 | -1 | -4 | 76.85   | 1.93 |
| 1 | -1 | -4 | 89.99   | 2.25 |
| 1 | -1 | -4 | 81.75   | 1.12 |
| 1 | -1 | -2 | 1101.40 | 9.49 |
| 1 | -1 | -2 | 955.65  | 9.44 |
| 1 | -1 | -2 | 1104.68 | 9.51 |
| 1 | -1 | -2 | 983.30  | 8.57 |
| 1 | -1 | -2 | 940.04  | 9.18 |
| 1 | -1 | -1 | 81.04   | 1.33 |
| 1 | -1 | -1 | 76.43   | 1.22 |
| 1 | -1 | -1 | 70.89   | 1.30 |
| 1 | -1 | -1 | 72.67   | 1.44 |
| 1 | -1 | -1 | 85.23   | 1.12 |
| 1 | -1 | -1 | 67.52   | 1.09 |

## CIF 31

|   |    |     |         |       |
|---|----|-----|---------|-------|
| 1 | -1 | 1   | 95.90   | 1.71  |
| 1 | -1 | 1   | 121.99  | 1.55  |
| 1 | -1 | 2   | 196.28  | 2.63  |
| 1 | -1 | 3   | 1151.76 | 10.90 |
| 1 | -1 | 3   | 1117.44 | 10.34 |
| 1 | -1 | 4   | 308.89  | 3.03  |
| 1 | -1 | 4   | 299.63  | 2.95  |
| 1 | -1 | 4   | 304.14  | 4.36  |
| 1 | -1 | 5   | 461.48  | 6.07  |
| 1 | -1 | 5   | 437.52  | 5.99  |
| 1 | -1 | 6   | 1785.13 | 16.49 |
| 1 | -1 | 6   | 1860.79 | 18.08 |
| 1 | -1 | 7   | 742.59  | 10.02 |
| 1 | -1 | 7   | 775.03  | 10.08 |
| 1 | -1 | 8   | 625.45  | 9.04  |
| 1 | -1 | 8   | 583.16  | 8.33  |
| 1 | -1 | 9   | 2674.18 | 27.34 |
| 1 | -1 | 9   | 2616.33 | 27.17 |
| 1 | -1 | 9   | 2662.08 | 26.89 |
| 1 | -1 | 10  | 181.84  | 5.18  |
| 1 | -1 | 10  | 188.32  | 5.55  |
| 1 | -1 | 11  | 538.60  | 9.19  |
| 1 | -1 | 11  | 505.95  | 9.68  |
| 1 | -1 | 12  | 119.62  | 3.81  |
| 1 | 0  | -15 | 44.17   | 1.65  |
| 1 | 0  | -15 | 46.93   | 1.75  |
| 1 | 0  | -14 | 84.24   | 2.88  |
| 1 | 0  | -14 | 82.91   | 3.00  |
| 1 | 0  | -13 | 275.40  | 5.07  |
| 1 | 0  | -13 | 257.27  | 5.31  |
| 1 | 0  | -12 | 94.57   | 3.77  |
| 1 | 0  | -12 | 94.22   | 3.14  |
| 1 | 0  | -12 | 88.51   | 4.66  |
| 1 | 0  | -12 | 85.41   | 3.22  |
| 1 | 0  | -12 | 96.12   | 3.93  |
| 1 | 0  | -11 | 1.03    | 0.96  |
| 1 | 0  | -11 | 1.15    | 0.79  |
| 1 | 0  | -11 | 2.49    | 1.23  |
| 1 | 0  | -11 | 1.33    | 0.87  |
| 1 | 0  | -11 | 2.28    | 3.91  |
| 1 | 0  | -11 | 1.84    | 1.29  |

## CIF 31

|   |   |     |         |       |
|---|---|-----|---------|-------|
| 1 | 0 | -11 | 1.02    | 1.10  |
| 1 | 0 | -10 | 499.50  | 10.47 |
| 1 | 0 | -10 | 532.16  | 11.42 |
| 1 | 0 | -10 | 506.29  | 9.74  |
| 1 | 0 | -10 | 578.54  | 10.00 |
| 1 | 0 | -10 | 543.72  | 8.43  |
| 1 | 0 | -10 | 539.20  | 9.40  |
| 1 | 0 | -10 | 546.95  | 9.60  |
| 1 | 0 | -9  | 104.02  | 3.87  |
| 1 | 0 | -9  | 89.06   | 3.62  |
| 1 | 0 | -9  | 104.24  | 4.49  |
| 1 | 0 | -9  | 100.32  | 4.11  |
| 1 | 0 | -9  | 103.98  | 3.66  |
| 1 | 0 | -9  | 104.22  | 3.61  |
| 1 | 0 | -8  | 220.11  | 5.43  |
| 1 | 0 | -8  | 249.99  | 5.67  |
| 1 | 0 | -8  | 272.76  | 6.68  |
| 1 | 0 | -8  | 228.48  | 4.64  |
| 1 | 0 | -8  | 244.15  | 5.15  |
| 1 | 0 | -8  | 244.62  | 5.58  |
| 1 | 0 | -8  | 279.14  | 6.49  |
| 1 | 0 | -8  | 264.67  | 5.45  |
| 1 | 0 | -7  | 1113.22 | 14.32 |
| 1 | 0 | -7  | 1071.65 | 13.90 |
| 1 | 0 | -7  | 1112.11 | 13.87 |
| 1 | 0 | -7  | 1102.76 | 13.30 |
| 1 | 0 | -7  | 1091.46 | 10.47 |
| 1 | 0 | -6  | 2536.39 | 24.44 |
| 1 | 0 | -6  | 2499.18 | 24.43 |
| 1 | 0 | -6  | 2486.70 | 23.70 |
| 1 | 0 | -5  | 38.68   | 1.64  |
| 1 | 0 | -5  | 35.84   | 1.47  |
| 1 | 0 | -5  | 36.64   | 1.34  |
| 1 | 0 | -5  | 34.71   | 1.64  |
| 1 | 0 | -5  | 33.24   | 1.21  |
| 1 | 0 | -5  | 35.56   | 1.64  |
| 1 | 0 | -5  | 36.40   | 1.54  |
| 1 | 0 | -4  | 5591.53 | 46.78 |
| 1 | 0 | -4  | 5352.69 | 45.93 |
| 1 | 0 | -4  | 5617.94 | 46.97 |
| 1 | 0 | -4  | 5477.51 | 46.93 |



## CIF 31

|   |   |     |         |       |
|---|---|-----|---------|-------|
| 1 | 0 | -4  | 5345.15 | 46.56 |
| 1 | 0 | -3  | 2363.20 | 20.43 |
| 1 | 0 | -3  | 2469.54 | 20.24 |
| 1 | 0 | -3  | 2422.31 | 20.05 |
| 1 | 0 | -3  | 2316.87 | 19.73 |
| 1 | 0 | -3  | 2208.72 | 19.20 |
| 1 | 0 | -3  | 2187.94 | 19.81 |
| 1 | 0 | -3  | 2215.09 | 19.27 |
| 1 | 0 | -2  | 2826.15 | 22.75 |
| 1 | 0 | -2  | 2466.72 | 22.77 |
| 1 | 0 | -2  | 2838.67 | 22.31 |
| 1 | 0 | -2  | 2595.45 | 22.50 |
| 1 | 0 | -2  | 2576.33 | 21.76 |
| 1 | 0 | -1  | 4.09    | 0.27  |
| 1 | 0 | -1  | 4.17    | 0.30  |
| 1 | 0 | 0   | 481.35  | 4.46  |
| 1 | 0 | 0   | 498.12  | 4.33  |
| 1 | 0 | 1   | 18.82   | 0.59  |
| 1 | 0 | 2   | 2321.49 | 19.75 |
| 1 | 0 | 2   | 2254.27 | 19.74 |
| 1 | 0 | 3   | 26.75   | 0.59  |
| 1 | 0 | 3   | 21.69   | 0.59  |
| 1 | 0 | 4   | 1439.01 | 13.57 |
| 1 | 0 | 4   | 1238.06 | 12.65 |
| 1 | 0 | 5   | 600.21  | 7.36  |
| 1 | 0 | 6   | 1703.29 | 16.97 |
| 1 | 0 | 6   | 1711.01 | 17.23 |
| 1 | 0 | 7   | 318.22  | 5.66  |
| 1 | 0 | 7   | 344.55  | 5.98  |
| 1 | 0 | 8   | 241.55  | 5.19  |
| 1 | 0 | 8   | 224.84  | 4.94  |
| 1 | 0 | 9   | 62.14   | 2.80  |
| 1 | 0 | 9   | 71.37   | 3.02  |
| 1 | 0 | 10  | 217.23  | 5.21  |
| 1 | 0 | 10  | 201.36  | 5.74  |
| 1 | 0 | 11  | 659.45  | 10.01 |
| 1 | 0 | 11  | 622.73  | 11.33 |
| 1 | 0 | 12  | 19.48   | 1.57  |
| 1 | 0 | 12  | 20.78   | 1.86  |
| 1 | 1 | -15 | 26.37   | 1.51  |
| 1 | 1 | -14 | 28.25   | 1.92  |

## CIF 31

|   |   |     |         |       |
|---|---|-----|---------|-------|
| 1 | 1 | -13 | 34.85   | 1.93  |
| 1 | 1 | -13 | 42.96   | 2.61  |
| 1 | 1 | -12 | 50.59   | 3.45  |
| 1 | 1 | -12 | 59.16   | 3.26  |
| 1 | 1 | -12 | 50.89   | 3.74  |
| 1 | 1 | -12 | 49.71   | 4.21  |
| 1 | 1 | -12 | 52.36   | 2.55  |
| 1 | 1 | -12 | 60.76   | 3.16  |
| 1 | 1 | -11 | 79.10   | 3.87  |
| 1 | 1 | -11 | 95.87   | 4.13  |
| 1 | 1 | -11 | 74.87   | 4.22  |
| 1 | 1 | -11 | 85.12   | 4.70  |
| 1 | 1 | -11 | 109.79  | 4.43  |
| 1 | 1 | -11 | 97.68   | 3.87  |
| 1 | 1 | -10 | 282.54  | 7.79  |
| 1 | 1 | -10 | 287.62  | 7.22  |
| 1 | 1 | -10 | 265.66  | 6.79  |
| 1 | 1 | -10 | 287.29  | 8.23  |
| 1 | 1 | -10 | 275.20  | 6.40  |
| 1 | 1 | -9  | 998.38  | 14.08 |
| 1 | 1 | -9  | 1013.46 | 15.40 |
| 1 | 1 | -9  | 1051.86 | 14.94 |
| 1 | 1 | -9  | 971.69  | 14.31 |
| 1 | 1 | -9  | 1059.16 | 16.29 |
| 1 | 1 | -9  | 1050.66 | 12.62 |
| 1 | 1 | -9  | 1001.70 | 12.99 |
| 1 | 1 | -9  | 1029.52 | 14.61 |
| 1 | 1 | -9  | 1119.55 | 13.87 |
| 1 | 1 | -8  | 2322.91 | 25.42 |
| 1 | 1 | -8  | 2381.60 | 24.91 |
| 1 | 1 | -8  | 2288.40 | 26.28 |
| 1 | 1 | -8  | 2209.08 | 25.06 |
| 1 | 1 | -8  | 2379.00 | 26.17 |
| 1 | 1 | -8  | 2221.68 | 23.60 |
| 1 | 1 | -7  | 852.36  | 10.71 |
| 1 | 1 | -7  | 822.32  | 11.99 |
| 1 | 1 | -7  | 839.05  | 12.14 |
| 1 | 1 | -7  | 921.55  | 11.92 |
| 1 | 1 | -7  | 897.47  | 11.39 |
| 1 | 1 | -7  | 867.57  | 11.99 |
| 1 | 1 | -7  | 856.68  | 11.61 |

## CIF 31

|   |   |    |         |       |
|---|---|----|---------|-------|
| 1 | 1 | -7 | 856.89  | 10.27 |
| 1 | 1 | -6 | 2908.32 | 28.03 |
| 1 | 1 | -6 | 2972.23 | 26.88 |
| 1 | 1 | -6 | 3025.02 | 27.27 |
| 1 | 1 | -6 | 3081.57 | 28.65 |
| 1 | 1 | -6 | 2988.99 | 28.09 |
| 1 | 1 | -6 | 2960.44 | 26.73 |
| 1 | 1 | -5 | 4128.72 | 35.99 |
| 1 | 1 | -5 | 3846.91 | 34.74 |
| 1 | 1 | -5 | 4115.98 | 35.30 |
| 1 | 1 | -5 | 3782.23 | 33.51 |
| 1 | 1 | -5 | 4346.74 | 34.23 |
| 1 | 1 | -5 | 3899.05 | 35.07 |
| 1 | 1 | -5 | 4099.66 | 35.89 |
| 1 | 1 | -5 | 3882.15 | 33.00 |
| 1 | 1 | -5 | 4076.06 | 34.97 |
| 1 | 1 | -1 | 552.33  | 5.40  |
| 1 | 1 | -1 | 555.93  | 5.23  |
| 1 | 1 | 0  | 3.95    | 0.36  |
| 1 | 1 | 0  | 3.38    | 0.20  |
| 1 | 1 | 0  | 3.80    | 0.18  |
| 1 | 1 | 0  | 4.03    | 0.34  |
| 1 | 1 | 1  | 6440.20 | 53.06 |
| 1 | 1 | 2  | 402.53  | 4.35  |
| 1 | 1 | 2  | 399.62  | 4.62  |
| 1 | 1 | 3  | 971.91  | 9.38  |
| 1 | 1 | 3  | 982.21  | 9.77  |
| 1 | 1 | 4  | 255.98  | 3.62  |
| 1 | 1 | 4  | 242.84  | 3.16  |
| 1 | 1 | 4  | 233.95  | 2.78  |
| 1 | 1 | 4  | 277.29  | 3.92  |
| 1 | 1 | 4  | 290.83  | 4.27  |
| 1 | 1 | 5  | 3417.69 | 30.05 |
| 1 | 1 | 5  | 3586.55 | 30.69 |
| 1 | 1 | 6  | 5.38    | 0.73  |
| 1 | 1 | 6  | 6.05    | 0.83  |
| 1 | 1 | 7  | 1722.93 | 17.71 |
| 1 | 1 | 7  | 1673.39 | 17.79 |
| 1 | 1 | 8  | 150.19  | 3.85  |
| 1 | 1 | 8  | 150.49  | 4.26  |
| 1 | 1 | 9  | 416.95  | 7.20  |

## CIF 31

|   |   |     |        |       |
|---|---|-----|--------|-------|
| 1 | 1 | 9   | 437.09 | 8.15  |
| 1 | 1 | 10  | 270.48 | 7.12  |
| 1 | 1 | 10  | 310.40 | 6.40  |
| 1 | 1 | 11  | 240.42 | 6.30  |
| 1 | 1 | 11  | 263.20 | 5.80  |
| 1 | 1 | 12  | 13.64  | 1.57  |
| 1 | 2 | -15 | 83.41  | 2.56  |
| 1 | 2 | -15 | 76.56  | 2.63  |
| 1 | 2 | -14 | 66.18  | 2.92  |
| 1 | 2 | -13 | 0.76   | 1.06  |
| 1 | 2 | -13 | 0.68   | 0.70  |
| 1 | 2 | -13 | 2.25   | 1.13  |
| 1 | 2 | -12 | 552.98 | 12.91 |
| 1 | 2 | -12 | 641.66 | 12.13 |
| 1 | 2 | -12 | 581.71 | 11.25 |
| 1 | 2 | -12 | 618.13 | 9.71  |
| 1 | 2 | -12 | 617.78 | 12.89 |
| 1 | 2 | -12 | 636.05 | 10.80 |
| 1 | 2 | -11 | 669.38 | 12.65 |
| 1 | 2 | -11 | 700.49 | 12.38 |
| 1 | 2 | -11 | 648.25 | 13.86 |
| 1 | 2 | -11 | 647.70 | 9.87  |
| 1 | 2 | -11 | 680.24 | 10.21 |
| 1 | 2 | -11 | 622.08 | 13.19 |
| 1 | 2 | -11 | 681.34 | 11.14 |
| 1 | 2 | -10 | 444.56 | 9.29  |
| 1 | 2 | -10 | 452.46 | 9.69  |
| 1 | 2 | -10 | 427.36 | 10.00 |
| 1 | 2 | -10 | 434.38 | 8.70  |
| 1 | 2 | -10 | 403.23 | 7.13  |
| 1 | 2 | -10 | 441.90 | 7.48  |
| 1 | 2 | -10 | 372.02 | 9.69  |
| 1 | 2 | -10 | 390.01 | 7.89  |
| 1 | 2 | -9  | 200.38 | 5.42  |
| 1 | 2 | -9  | 194.26 | 5.34  |
| 1 | 2 | -9  | 160.47 | 4.00  |
| 1 | 2 | -9  | 182.02 | 5.94  |
| 1 | 2 | -9  | 188.44 | 5.71  |
| 1 | 2 | -9  | 185.10 | 5.51  |
| 1 | 2 | -9  | 186.36 | 5.64  |
| 1 | 2 | -9  | 163.04 | 4.40  |

## CIF 31

|   |   |    |         |       |
|---|---|----|---------|-------|
| 1 | 2 | -8 | 16.66   | 1.54  |
| 1 | 2 | -8 | 19.23   | 1.87  |
| 1 | 2 | -8 | 19.04   | 1.62  |
| 1 | 2 | -8 | 17.13   | 1.56  |
| 1 | 2 | -8 | 18.43   | 1.76  |
| 1 | 2 | -8 | 19.34   | 1.77  |
| 1 | 2 | -8 | 20.55   | 1.80  |
| 1 | 2 | -8 | 22.12   | 1.55  |
| 1 | 2 | -8 | 13.97   | 1.71  |
| 1 | 2 | -7 | 1016.38 | 11.87 |
| 1 | 2 | -7 | 1011.96 | 12.73 |
| 1 | 2 | -7 | 929.43  | 13.22 |
| 1 | 2 | -7 | 1190.00 | 13.41 |
| 1 | 2 | -7 | 1063.63 | 13.81 |
| 1 | 2 | -7 | 982.92  | 11.88 |
| 1 | 2 | -7 | 998.30  | 13.46 |
| 1 | 2 | -7 | 1021.42 | 12.49 |
| 1 | 2 | -7 | 1114.35 | 14.33 |
| 1 | 2 | -7 | 1008.69 | 13.88 |
| 1 | 2 | -6 | 198.66  | 3.79  |
| 1 | 2 | -6 | 197.17  | 4.26  |
| 1 | 2 | -6 | 194.30  | 3.91  |
| 1 | 2 | -6 | 205.21  | 4.10  |
| 1 | 2 | -6 | 199.34  | 4.57  |
| 1 | 2 | -6 | 196.70  | 4.16  |
| 1 | 2 | -6 | 199.52  | 4.15  |
| 1 | 2 | -6 | 193.87  | 3.54  |
| 1 | 2 | -5 | 4376.24 | 39.54 |
| 1 | 2 | -5 | 4680.69 | 40.74 |
| 1 | 2 | -5 | 4537.08 | 37.59 |
| 1 | 2 | -5 | 4413.33 | 40.01 |
| 1 | 2 | -5 | 4711.13 | 40.30 |
| 1 | 2 | -5 | 4701.97 | 40.12 |
| 1 | 2 | -5 | 4675.20 | 41.19 |
| 1 | 2 | -5 | 4642.25 | 41.06 |
| 1 | 2 | -5 | 4695.21 | 38.66 |
| 1 | 2 | -5 | 4312.34 | 40.19 |
| 1 | 2 | -5 | 4580.69 | 40.48 |
| 1 | 2 | -4 | 647.13  | 6.87  |
| 1 | 2 | -4 | 680.48  | 7.99  |
| 1 | 2 | -4 | 684.49  | 8.08  |

## CIF 31

|   |   |    |         |       |
|---|---|----|---------|-------|
| 1 | 2 | -4 | 605.96  | 7.08  |
| 1 | 2 | -4 | 601.53  | 5.94  |
| 1 | 2 | -4 | 561.79  | 7.26  |
| 1 | 2 | -4 | 692.51  | 7.93  |
| 1 | 2 | -4 | 682.29  | 8.08  |
| 1 | 2 | -4 | 607.11  | 7.36  |
| 1 | 2 | -4 | 682.55  | 7.94  |
| 1 | 2 | -3 | 5669.75 | 54.39 |
| 1 | 2 | -3 | 7390.56 | 55.07 |
| 1 | 2 | -2 | 1114.44 | 10.80 |
| 1 | 2 | -2 | 1236.83 | 11.92 |
| 1 | 2 | -2 | 1254.33 | 10.95 |
| 1 | 2 | -2 | 1083.90 | 10.72 |
| 1 | 2 | -2 | 1132.55 | 11.05 |
| 1 | 2 | -2 | 1162.07 | 11.07 |
| 1 | 2 | -2 | 1190.64 | 10.84 |
| 1 | 2 | -2 | 1043.24 | 10.90 |
| 1 | 2 | -1 | 3145.27 | 28.07 |
| 1 | 2 | -1 | 3192.58 | 26.16 |
| 1 | 2 | -1 | 3008.05 | 26.77 |
| 1 | 2 | -1 | 2883.05 | 27.00 |
| 1 | 2 | -1 | 3348.65 | 26.60 |
| 1 | 2 | -1 | 3223.91 | 26.34 |
| 1 | 2 | 0  | 6.93    | 0.67  |
| 1 | 2 | 0  | 2.47    | 0.35  |
| 1 | 2 | 0  | 2.38    | 0.38  |
| 1 | 2 | 0  | 3.05    | 0.49  |
| 1 | 2 | 0  | 2.62    | 0.26  |
| 1 | 2 | 0  | 7.26    | 0.59  |
| 1 | 2 | 0  | 3.29    | 0.30  |
| 1 | 2 | 1  | 4131.96 | 37.10 |
| 1 | 2 | 1  | 4122.04 | 35.92 |
| 1 | 2 | 2  | 1338.93 | 10.99 |
| 1 | 2 | 2  | 1034.81 | 9.53  |
| 1 | 2 | 2  | 1220.22 | 10.84 |
| 1 | 2 | 2  | 1110.69 | 10.32 |
| 1 | 2 | 2  | 977.74  | 9.79  |
| 1 | 2 | 2  | 1088.72 | 10.76 |
| 1 | 2 | 3  | 1198.84 | 11.02 |
| 1 | 2 | 3  | 1172.75 | 10.53 |
| 1 | 2 | 3  | 1213.73 | 11.46 |

## CIF 31

|   |   |     |         |       |
|---|---|-----|---------|-------|
| 1 | 2 | 3   | 1255.31 | 11.79 |
| 1 | 2 | 3   | 1180.24 | 11.39 |
| 1 | 2 | 3   | 1241.15 | 12.34 |
| 1 | 2 | 4   | 35.59   | 1.16  |
| 1 | 2 | 4   | 33.06   | 1.06  |
| 1 | 2 | 4   | 32.01   | 1.22  |
| 1 | 2 | 4   | 34.69   | 1.49  |
| 1 | 2 | 5   | 40.05   | 1.41  |
| 1 | 2 | 5   | 41.89   | 1.31  |
| 1 | 2 | 5   | 42.76   | 1.83  |
| 1 | 2 | 6   | 28.06   | 1.33  |
| 1 | 2 | 6   | 28.39   | 1.51  |
| 1 | 2 | 6   | 26.55   | 1.60  |
| 1 | 2 | 7   | 401.31  | 6.22  |
| 1 | 2 | 7   | 422.05  | 6.97  |
| 1 | 2 | 8   | 9.88    | 1.19  |
| 1 | 2 | 8   | 6.14    | 1.15  |
| 1 | 2 | 9   | 4.33    | 0.89  |
| 1 | 2 | 10  | 355.10  | 6.87  |
| 1 | 2 | 11  | 342.77  | 6.44  |
| 1 | 2 | 11  | 287.59  | 7.00  |
| 1 | 3 | -15 | 1.85    | 0.75  |
| 1 | 3 | -15 | 1.00    | 0.74  |
| 1 | 3 | -14 | 90.18   | 3.71  |
| 1 | 3 | -14 | 116.24  | 3.81  |
| 1 | 3 | -13 | 95.70   | 4.49  |
| 1 | 3 | -13 | 89.23   | 4.05  |
| 1 | 3 | -12 | 439.21  | 7.81  |
| 1 | 3 | -12 | 456.83  | 11.37 |
| 1 | 3 | -12 | 499.62  | 11.23 |
| 1 | 3 | -12 | 525.79  | 10.67 |
| 1 | 3 | -12 | 548.05  | 9.71  |
| 1 | 3 | -11 | 200.76  | 7.25  |
| 1 | 3 | -11 | 214.06  | 7.16  |
| 1 | 3 | -11 | 207.72  | 6.56  |
| 1 | 3 | -11 | 206.14  | 6.25  |
| 1 | 3 | -11 | 190.18  | 4.80  |
| 1 | 3 | -11 | 200.36  | 5.58  |
| 1 | 3 | -10 | 981.01  | 15.64 |
| 1 | 3 | -10 | 1100.52 | 17.12 |
| 1 | 3 | -10 | 1053.06 | 15.69 |

## CIF 31

|   |   |     |         |       |
|---|---|-----|---------|-------|
| 1 | 3 | -10 | 1022.06 | 17.39 |
| 1 | 3 | -10 | 1048.46 | 13.14 |
| 1 | 3 | -10 | 1111.95 | 17.51 |
| 1 | 3 | -10 | 1015.49 | 14.33 |
| 1 | 3 | -9  | 300.60  | 7.15  |
| 1 | 3 | -9  | 340.94  | 8.18  |
| 1 | 3 | -9  | 318.56  | 7.71  |
| 1 | 3 | -9  | 312.92  | 7.28  |
| 1 | 3 | -9  | 317.48  | 7.50  |
| 1 | 3 | -9  | 322.68  | 6.97  |
| 1 | 3 | -9  | 340.91  | 8.58  |
| 1 | 3 | -9  | 331.31  | 5.90  |
| 1 | 3 | -9  | 327.95  | 8.35  |
| 1 | 3 | -9  | 307.96  | 7.90  |
| 1 | 3 | -9  | 312.57  | 6.32  |
| 1 | 3 | -8  | 605.35  | 8.46  |
| 1 | 3 | -8  | 515.44  | 10.08 |
| 1 | 3 | -8  | 560.52  | 9.68  |
| 1 | 3 | -8  | 635.56  | 10.80 |
| 1 | 3 | -8  | 535.90  | 9.40  |
| 1 | 3 | -8  | 527.54  | 9.58  |
| 1 | 3 | -8  | 577.42  | 9.88  |
| 1 | 3 | -8  | 578.87  | 10.93 |
| 1 | 3 | -8  | 579.96  | 7.96  |
| 1 | 3 | -8  | 551.13  | 8.81  |
| 1 | 3 | -8  | 579.59  | 10.39 |
| 1 | 3 | -8  | 570.57  | 9.34  |
| 1 | 3 | -8  | 573.92  | 8.58  |
| 1 | 3 | -7  | 6596.84 | 57.64 |
| 1 | 3 | -7  | 6612.57 | 59.82 |
| 1 | 3 | -7  | 6701.52 | 61.16 |
| 1 | 3 | -7  | 6824.78 | 59.75 |
| 1 | 3 | -7  | 7081.51 | 61.52 |
| 1 | 3 | -7  | 6669.07 | 60.65 |
| 1 | 3 | -7  | 6691.64 | 60.13 |
| 1 | 3 | -7  | 6644.23 | 58.95 |
| 1 | 3 | -7  | 6495.07 | 58.44 |
| 1 | 3 | -7  | 6488.32 | 60.47 |
| 1 | 3 | -7  | 6857.35 | 59.57 |
| 1 | 3 | -7  | 7001.95 | 61.26 |
| 1 | 3 | -7  | 5978.56 | 58.51 |



## CIF 31

|   |   |    |         |       |
|---|---|----|---------|-------|
| 1 | 3 | -6 | 6238.77 | 54.31 |
| 1 | 3 | -6 | 6412.06 | 56.22 |
| 1 | 3 | -6 | 6204.88 | 55.62 |
| 1 | 3 | -6 | 6240.26 | 54.89 |
| 1 | 3 | -6 | 6249.61 | 54.96 |
| 1 | 3 | -6 | 6269.08 | 56.06 |
| 1 | 3 | -6 | 6191.22 | 55.51 |
| 1 | 3 | -5 | 3861.00 | 33.42 |
| 1 | 3 | -5 | 3940.72 | 35.13 |
| 1 | 3 | -5 | 3779.12 | 34.73 |
| 1 | 3 | -5 | 3617.98 | 34.09 |
| 1 | 3 | -5 | 3754.81 | 34.29 |
| 1 | 3 | -5 | 3654.53 | 33.87 |
| 1 | 3 | -5 | 3783.06 | 35.29 |
| 1 | 3 | -5 | 3661.81 | 32.97 |
| 1 | 3 | -5 | 3942.56 | 35.07 |
| 1 | 3 | -4 | 1585.74 | 15.52 |
| 1 | 3 | -4 | 1525.35 | 14.03 |
| 1 | 3 | -4 | 1702.35 | 16.07 |
| 1 | 3 | -4 | 1644.26 | 16.14 |
| 1 | 3 | -4 | 1676.32 | 16.93 |
| 1 | 3 | -4 | 1575.47 | 16.47 |
| 1 | 3 | -4 | 1651.02 | 16.05 |
| 1 | 3 | -4 | 1702.42 | 17.02 |
| 1 | 3 | -4 | 1606.85 | 15.56 |
| 1 | 3 | -4 | 1720.91 | 16.21 |
| 1 | 3 | -4 | 1706.85 | 16.98 |
| 1 | 3 | -4 | 1569.94 | 15.50 |
| 1 | 3 | -3 | 160.46  | 3.46  |
| 1 | 3 | -3 | 154.58  | 2.87  |
| 1 | 3 | -3 | 162.26  | 3.01  |
| 1 | 3 | -3 | 174.90  | 3.68  |
| 1 | 3 | -3 | 154.56  | 3.40  |
| 1 | 3 | -3 | 166.66  | 3.37  |
| 1 | 3 | -3 | 158.98  | 3.06  |
| 1 | 3 | -3 | 161.30  | 3.06  |
| 1 | 3 | -3 | 161.57  | 2.95  |
| 1 | 3 | -3 | 141.98  | 3.02  |
| 1 | 3 | -2 | 3153.88 | 27.58 |
| 1 | 3 | -2 | 3240.49 | 26.69 |
| 1 | 3 | -2 | 2972.71 | 26.57 |

## CIF 31

|   |   |    |         |       |
|---|---|----|---------|-------|
| 1 | 3 | -2 | 3060.69 | 27.89 |
| 1 | 3 | -2 | 2822.94 | 27.70 |
| 1 | 3 | -2 | 3013.77 | 26.95 |
| 1 | 3 | -2 | 2948.27 | 26.99 |
| 1 | 3 | -2 | 2844.79 | 26.64 |
| 1 | 3 | -2 | 3102.70 | 26.40 |
| 1 | 3 | -2 | 3057.63 | 27.59 |
| 1 | 3 | -1 | 787.69  | 8.68  |
| 1 | 3 | -1 | 696.88  | 7.89  |
| 1 | 3 | -1 | 695.48  | 8.07  |
| 1 | 3 | -1 | 794.17  | 9.20  |
| 1 | 3 | -1 | 838.69  | 7.68  |
| 1 | 3 | -1 | 772.62  | 8.21  |
| 1 | 3 | -1 | 801.77  | 8.82  |
| 1 | 3 | -1 | 710.45  | 7.65  |
| 1 | 3 | -1 | 720.29  | 7.42  |
| 1 | 3 | 0  | 1005.00 | 10.39 |
| 1 | 3 | 0  | 995.25  | 11.06 |
| 1 | 3 | 0  | 1018.47 | 10.63 |
| 1 | 3 | 0  | 1017.03 | 9.17  |
| 1 | 3 | 0  | 1032.23 | 10.67 |
| 1 | 3 | 1  | 22.98   | 1.07  |
| 1 | 3 | 1  | 36.74   | 1.30  |
| 1 | 3 | 1  | 9.62    | 0.86  |
| 1 | 3 | 1  | 21.95   | 1.21  |
| 1 | 3 | 1  | 44.18   | 1.57  |
| 1 | 3 | 1  | 23.50   | 0.61  |
| 1 | 3 | 1  | 25.24   | 1.13  |
| 1 | 3 | 1  | 17.35   | 0.82  |
| 1 | 3 | 2  | 1160.65 | 12.44 |
| 1 | 3 | 2  | 1178.40 | 11.33 |
| 1 | 3 | 2  | 1185.06 | 12.07 |
| 1 | 3 | 2  | 1183.79 | 11.56 |
| 1 | 3 | 3  | 237.79  | 4.98  |
| 1 | 3 | 3  | 261.01  | 3.90  |
| 1 | 3 | 4  | 19.40   | 1.31  |
| 1 | 3 | 4  | 15.62   | 1.19  |
| 1 | 3 | 4  | 19.19   | 1.11  |
| 1 | 3 | 5  | 238.44  | 4.54  |
| 1 | 3 | 6  | 1383.64 | 17.43 |
| 1 | 3 | 6  | 1614.65 | 16.69 |

## CIF 31

|   |   |     |        |      |
|---|---|-----|--------|------|
| 1 | 3 | 7   | 221.36 | 5.11 |
| 1 | 3 | 7   | 206.26 | 4.71 |
| 1 | 3 | 8   | 87.38  | 3.27 |
| 1 | 3 | 8   | 85.01  | 3.06 |
| 1 | 3 | 9   | 449.85 | 7.90 |
| 1 | 3 | 9   | 388.67 | 7.26 |
| 1 | 3 | 10  | 410.56 | 7.44 |
| 1 | 3 | 11  | 134.66 | 4.46 |
| 1 | 4 | -15 | 24.05  | 1.55 |
| 1 | 4 | -14 | 19.44  | 2.02 |
| 1 | 4 | -14 | 21.41  | 1.93 |
| 1 | 4 | -14 | 26.09  | 1.88 |
| 1 | 4 | -13 | 4.66   | 1.49 |
| 1 | 4 | -13 | 3.40   | 1.36 |
| 1 | 4 | -13 | 5.54   | 0.91 |
| 1 | 4 | -13 | 6.43   | 1.32 |
| 1 | 4 | -12 | 11.56  | 2.26 |
| 1 | 4 | -12 | 14.83  | 2.13 |
| 1 | 4 | -12 | 10.15  | 1.76 |
| 1 | 4 | -12 | 12.34  | 1.33 |
| 1 | 4 | -12 | 15.43  | 2.22 |
| 1 | 4 | -11 | 0.56   | 1.14 |
| 1 | 4 | -11 | 0.06   | 1.02 |
| 1 | 4 | -11 | 0.20   | 0.71 |
| 1 | 4 | -10 | 22.09  | 2.43 |
| 1 | 4 | -10 | 22.37  | 2.31 |
| 1 | 4 | -10 | 23.03  | 2.56 |
| 1 | 4 | -10 | 15.02  | 1.41 |
| 1 | 4 | -10 | 24.35  | 2.56 |
| 1 | 4 | -10 | 19.41  | 1.95 |
| 1 | 4 | -9  | 136.32 | 4.99 |
| 1 | 4 | -9  | 136.13 | 3.78 |
| 1 | 4 | -9  | 147.11 | 5.10 |
| 1 | 4 | -9  | 140.33 | 5.53 |
| 1 | 4 | -9  | 134.92 | 5.22 |
| 1 | 4 | -9  | 136.60 | 4.82 |
| 1 | 4 | -9  | 143.46 | 5.16 |
| 1 | 4 | -9  | 147.29 | 5.48 |
| 1 | 4 | -9  | 123.97 | 5.19 |
| 1 | 4 | -9  | 128.42 | 3.59 |
| 1 | 4 | -9  | 140.34 | 4.54 |

## CIF 31

|   |   |    |         |       |
|---|---|----|---------|-------|
| 1 | 4 | -9 | 126.15  | 5.18  |
| 1 | 4 | -9 | 144.37  | 4.83  |
| 1 | 4 | -9 | 128.10  | 4.26  |
| 1 | 4 | -8 | 223.15  | 4.73  |
| 1 | 4 | -8 | 222.18  | 6.38  |
| 1 | 4 | -8 | 219.00  | 5.97  |
| 1 | 4 | -8 | 217.03  | 6.48  |
| 1 | 4 | -8 | 239.67  | 6.07  |
| 1 | 4 | -8 | 192.71  | 5.90  |
| 1 | 4 | -8 | 219.75  | 6.17  |
| 1 | 4 | -8 | 217.35  | 6.44  |
| 1 | 4 | -8 | 203.26  | 4.43  |
| 1 | 4 | -8 | 227.11  | 5.72  |
| 1 | 4 | -8 | 214.99  | 5.17  |
| 1 | 4 | -8 | 210.25  | 5.45  |
| 1 | 4 | -8 | 219.16  | 5.83  |
| 1 | 4 | -8 | 215.26  | 5.10  |
| 1 | 4 | -7 | 106.81  | 3.80  |
| 1 | 4 | -7 | 92.91   | 3.23  |
| 1 | 4 | -7 | 86.70   | 2.73  |
| 1 | 4 | -7 | 94.15   | 3.68  |
| 1 | 4 | -7 | 77.52   | 3.02  |
| 1 | 4 | -7 | 110.72  | 4.23  |
| 1 | 4 | -7 | 125.90  | 4.38  |
| 1 | 4 | -7 | 104.22  | 3.86  |
| 1 | 4 | -7 | 87.37   | 3.76  |
| 1 | 4 | -7 | 102.13  | 3.56  |
| 1 | 4 | -7 | 86.23   | 3.04  |
| 1 | 4 | -7 | 78.12   | 3.58  |
| 1 | 4 | -7 | 101.22  | 3.74  |
| 1 | 4 | -7 | 76.66   | 2.92  |
| 1 | 4 | -6 | 1315.78 | 15.60 |
| 1 | 4 | -6 | 1295.35 | 14.23 |
| 1 | 4 | -6 | 1400.59 | 16.48 |
| 1 | 4 | -6 | 1375.64 | 16.39 |
| 1 | 4 | -6 | 1319.88 | 17.40 |
| 1 | 4 | -6 | 1356.79 | 15.60 |
| 1 | 4 | -6 | 1306.42 | 14.80 |
| 1 | 4 | -6 | 1324.66 | 15.69 |
| 1 | 4 | -6 | 1472.55 | 17.19 |
| 1 | 4 | -6 | 1348.67 | 16.59 |

## CIF 31

|   |   |    |         |       |
|---|---|----|---------|-------|
| 1 | 4 | -6 | 1353.72 | 16.09 |
| 1 | 4 | -6 | 1379.75 | 15.70 |
| 1 | 4 | -6 | 1405.27 | 15.23 |
| 1 | 4 | -6 | 1354.48 | 16.79 |
| 1 | 4 | -6 | 1286.43 | 15.37 |
| 1 | 4 | -6 | 1376.18 | 16.53 |
| 1 | 4 | -6 | 1250.58 | 16.24 |
| 1 | 4 | -5 | 675.60  | 8.51  |
| 1 | 4 | -5 | 690.11  | 9.18  |
| 1 | 4 | -5 | 684.21  | 9.31  |
| 1 | 4 | -5 | 747.53  | 9.54  |
| 1 | 4 | -5 | 662.20  | 9.82  |
| 1 | 4 | -5 | 696.15  | 9.76  |
| 1 | 4 | -5 | 733.39  | 9.24  |
| 1 | 4 | -5 | 666.24  | 10.00 |
| 1 | 4 | -5 | 717.52  | 9.25  |
| 1 | 4 | -5 | 710.30  | 10.07 |
| 1 | 4 | -5 | 688.95  | 8.56  |
| 1 | 4 | -4 | 305.06  | 4.79  |
| 1 | 4 | -4 | 285.44  | 4.97  |
| 1 | 4 | -4 | 297.34  | 5.53  |
| 1 | 4 | -4 | 310.37  | 5.84  |
| 1 | 4 | -4 | 301.84  | 5.18  |
| 1 | 4 | -4 | 293.41  | 5.02  |
| 1 | 4 | -4 | 303.32  | 5.67  |
| 1 | 4 | -4 | 307.43  | 5.05  |
| 1 | 4 | -4 | 288.73  | 4.87  |
| 1 | 4 | -4 | 304.67  | 5.70  |
| 1 | 4 | -4 | 302.82  | 5.17  |
| 1 | 4 | -3 | 2022.23 | 20.50 |
| 1 | 4 | -3 | 1975.99 | 19.22 |
| 1 | 4 | -3 | 2149.15 | 19.85 |
| 1 | 4 | -3 | 1928.95 | 20.87 |
| 1 | 4 | -3 | 1993.87 | 20.23 |
| 1 | 4 | -3 | 1934.29 | 19.56 |
| 1 | 4 | -3 | 2130.64 | 20.05 |
| 1 | 4 | -3 | 2242.20 | 19.65 |
| 1 | 4 | -3 | 1846.54 | 20.51 |
| 1 | 4 | -3 | 2126.09 | 19.99 |
| 1 | 4 | -3 | 2010.10 | 20.47 |
| 1 | 4 | -2 | 94.18   | 2.68  |

## CIF 31

|   |   |    |        |      |
|---|---|----|--------|------|
| 1 | 4 | -2 | 101.12 | 2.43 |
| 1 | 4 | -2 | 93.22  | 2.50 |
| 1 | 4 | -2 | 115.85 | 3.23 |
| 1 | 4 | -2 | 110.50 | 2.63 |
| 1 | 4 | -2 | 101.37 | 2.67 |
| 1 | 4 | -2 | 89.38  | 2.43 |
| 1 | 4 | -2 | 103.94 | 2.28 |
| 1 | 4 | -2 | 115.60 | 3.07 |
| 1 | 4 | -2 | 96.07  | 2.10 |
| 1 | 4 | -2 | 94.21  | 2.54 |
| 1 | 4 | -1 | 27.33  | 1.36 |
| 1 | 4 | -1 | 27.73  | 1.29 |
| 1 | 4 | -1 | 25.97  | 1.58 |
| 1 | 4 | -1 | 29.47  | 1.62 |
| 1 | 4 | -1 | 26.20  | 1.37 |
| 1 | 4 | -1 | 31.73  | 1.13 |
| 1 | 4 | -1 | 27.03  | 1.33 |
| 1 | 4 | -1 | 28.16  | 1.48 |
| 1 | 4 | -1 | 23.95  | 1.00 |
| 1 | 4 | 0  | 678.98 | 8.17 |
| 1 | 4 | 0  | 692.49 | 8.21 |
| 1 | 4 | 0  | 667.77 | 9.26 |
| 1 | 4 | 0  | 694.41 | 8.71 |
| 1 | 4 | 0  | 691.42 | 7.03 |
| 1 | 4 | 0  | 702.95 | 8.71 |
| 1 | 4 | 0  | 696.87 | 7.55 |
| 1 | 4 | 0  | 682.22 | 8.54 |
| 1 | 4 | 1  | 100.26 | 2.71 |
| 1 | 4 | 1  | 99.37  | 2.23 |
| 1 | 4 | 1  | 110.79 | 3.02 |
| 1 | 4 | 1  | 92.63  | 2.95 |
| 1 | 4 | 1  | 98.47  | 2.52 |
| 1 | 4 | 1  | 113.40 | 2.69 |
| 1 | 4 | 1  | 93.23  | 2.12 |
| 1 | 4 | 2  | 48.28  | 1.85 |
| 1 | 4 | 2  | 46.10  | 2.06 |
| 1 | 4 | 2  | 47.57  | 1.91 |
| 1 | 4 | 2  | 41.67  | 2.38 |
| 1 | 4 | 2  | 44.64  | 1.54 |
| 1 | 4 | 3  | 443.11 | 6.47 |
| 1 | 4 | 3  | 367.41 | 6.37 |

## CIF 31

|   |   |     |         |       |
|---|---|-----|---------|-------|
| 1 | 4 | 3   | 422.53  | 6.79  |
| 1 | 4 | 3   | 359.17  | 7.31  |
| 1 | 4 | 3   | 406.02  | 5.77  |
| 1 | 4 | 4   | 0.70    | 0.57  |
| 1 | 4 | 4   | 0.73    | 0.60  |
| 1 | 4 | 4   | 1.72    | 0.84  |
| 1 | 4 | 4   | 0.91    | 0.48  |
| 1 | 4 | 5   | 13.22   | 1.56  |
| 1 | 4 | 5   | 15.59   | 1.24  |
| 1 | 4 | 5   | 14.26   | 1.46  |
| 1 | 4 | 6   | 15.86   | 1.56  |
| 1 | 4 | 6   | 17.56   | 1.66  |
| 1 | 4 | 6   | 11.61   | 1.49  |
| 1 | 4 | 6   | 15.00   | 1.30  |
| 1 | 4 | 7   | 2.25    | 0.88  |
| 1 | 4 | 7   | 2.38    | 0.70  |
| 1 | 4 | 8   | 1743.86 | 19.40 |
| 1 | 4 | 8   | 1494.18 | 20.61 |
| 1 | 4 | 9   | 86.09   | 3.35  |
| 1 | 4 | 9   | 80.08   | 3.13  |
| 1 | 4 | 10  | 3.27    | 1.14  |
| 1 | 5 | -15 | 7.97    | 1.00  |
| 1 | 5 | -14 | 154.41  | 5.35  |
| 1 | 5 | -14 | 159.96  | 4.85  |
| 1 | 5 | -13 | 32.12   | 2.88  |
| 1 | 5 | -13 | 32.85   | 2.61  |
| 1 | 5 | -13 | 35.18   | 1.81  |
| 1 | 5 | -12 | 207.07  | 6.78  |
| 1 | 5 | -12 | 218.39  | 7.43  |
| 1 | 5 | -12 | 203.72  | 6.60  |
| 1 | 5 | -12 | 199.73  | 4.77  |
| 1 | 5 | -11 | 50.89   | 3.75  |
| 1 | 5 | -11 | 46.03   | 3.45  |
| 1 | 5 | -11 | 41.65   | 3.53  |
| 1 | 5 | -11 | 42.40   | 3.28  |
| 1 | 5 | -11 | 40.60   | 2.21  |
| 1 | 5 | -11 | 41.62   | 2.94  |
| 1 | 5 | -10 | 208.19  | 7.46  |
| 1 | 5 | -10 | 204.11  | 7.12  |
| 1 | 5 | -10 | 212.06  | 7.07  |
| 1 | 5 | -10 | 228.57  | 5.21  |

## CIF 31

|   |   |     |        |       |
|---|---|-----|--------|-------|
| 1 | 5 | -10 | 230.20 | 6.45  |
| 1 | 5 | -10 | 229.34 | 7.41  |
| 1 | 5 | -10 | 233.95 | 6.87  |
| 1 | 5 | -9  | 628.45 | 11.80 |
| 1 | 5 | -9  | 561.93 | 11.63 |
| 1 | 5 | -9  | 549.90 | 11.00 |
| 1 | 5 | -9  | 600.68 | 11.74 |
| 1 | 5 | -9  | 555.25 | 12.04 |
| 1 | 5 | -9  | 693.68 | 9.58  |
| 1 | 5 | -9  | 595.25 | 11.01 |
| 1 | 5 | -9  | 667.96 | 10.41 |
| 1 | 5 | -9  | 592.02 | 11.39 |
| 1 | 5 | -8  | 604.90 | 10.23 |
| 1 | 5 | -8  | 628.21 | 11.91 |
| 1 | 5 | -8  | 631.33 | 8.96  |
| 1 | 5 | -8  | 612.23 | 10.89 |
| 1 | 5 | -8  | 643.98 | 11.63 |
| 1 | 5 | -8  | 585.91 | 11.52 |
| 1 | 5 | -8  | 557.00 | 10.77 |
| 1 | 5 | -8  | 655.24 | 11.71 |
| 1 | 5 | -8  | 654.18 | 10.05 |
| 1 | 5 | -8  | 602.14 | 11.61 |
| 1 | 5 | -8  | 634.56 | 11.43 |
| 1 | 5 | -8  | 668.12 | 10.11 |
| 1 | 5 | -7  | 49.45  | 2.65  |
| 1 | 5 | -7  | 53.66  | 2.21  |
| 1 | 5 | -7  | 48.48  | 2.88  |
| 1 | 5 | -7  | 46.61  | 2.71  |
| 1 | 5 | -7  | 46.51  | 2.91  |
| 1 | 5 | -7  | 43.72  | 3.03  |
| 1 | 5 | -7  | 54.20  | 2.68  |
| 1 | 5 | -7  | 48.99  | 2.34  |
| 1 | 5 | -7  | 53.14  | 2.69  |
| 1 | 5 | -7  | 48.50  | 2.95  |
| 1 | 5 | -7  | 53.08  | 2.90  |
| 1 | 5 | -7  | 52.42  | 2.50  |
| 1 | 5 | -7  | 46.91  | 2.88  |
| 1 | 5 | -7  | 45.08  | 2.53  |
| 1 | 5 | -7  | 49.59  | 2.92  |
| 1 | 5 | -6  | 94.56  | 3.57  |
| 1 | 5 | -6  | 88.22  | 2.72  |



## CIF 31

|   |   |    |         |       |
|---|---|----|---------|-------|
| 1 | 5 | -6 | 93.01   | 3.72  |
| 1 | 5 | -6 | 99.26   | 3.93  |
| 1 | 5 | -6 | 94.87   | 3.29  |
| 1 | 5 | -6 | 105.38  | 3.67  |
| 1 | 5 | -6 | 89.83   | 3.27  |
| 1 | 5 | -6 | 87.56   | 3.69  |
| 1 | 5 | -6 | 97.22   | 3.72  |
| 1 | 5 | -6 | 97.93   | 3.57  |
| 1 | 5 | -6 | 90.93   | 3.11  |
| 1 | 5 | -6 | 87.47   | 4.04  |
| 1 | 5 | -6 | 87.62   | 3.66  |
| 1 | 5 | -6 | 91.67   | 3.37  |
| 1 | 5 | -6 | 95.96   | 3.35  |
| 1 | 5 | -6 | 95.49   | 3.82  |
| 1 | 5 | -6 | 88.47   | 3.80  |
| 1 | 5 | -6 | 89.94   | 3.08  |
| 1 | 5 | -5 | 2442.81 | 26.47 |
| 1 | 5 | -5 | 2515.84 | 26.64 |
| 1 | 5 | -5 | 2524.29 | 24.33 |
| 1 | 5 | -5 | 2570.29 | 25.41 |
| 1 | 5 | -5 | 2450.17 | 28.45 |
| 1 | 5 | -5 | 2530.19 | 26.49 |
| 1 | 5 | -5 | 2534.22 | 26.26 |
| 1 | 5 | -5 | 2453.84 | 26.45 |
| 1 | 5 | -5 | 2634.25 | 27.14 |
| 1 | 5 | -5 | 2672.78 | 25.85 |
| 1 | 5 | -5 | 2524.69 | 26.90 |
| 1 | 5 | -5 | 2639.82 | 26.85 |
| 1 | 5 | -5 | 2505.26 | 25.10 |
| 1 | 5 | -5 | 2356.35 | 26.34 |
| 1 | 5 | -5 | 2765.36 | 25.69 |
| 1 | 5 | -5 | 2284.40 | 27.77 |
| 1 | 5 | -5 | 2614.00 | 25.31 |
| 1 | 5 | -4 | 2463.47 | 25.68 |
| 1 | 5 | -4 | 2383.54 | 25.10 |
| 1 | 5 | -4 | 2333.36 | 23.12 |
| 1 | 5 | -4 | 2540.02 | 24.24 |
| 1 | 5 | -4 | 2418.62 | 25.33 |
| 1 | 5 | -4 | 2518.42 | 25.79 |
| 1 | 5 | -4 | 2365.85 | 25.31 |
| 1 | 5 | -4 | 2557.61 | 25.66 |

## CIF 31

|   |   |    |         |       |
|---|---|----|---------|-------|
| 1 | 5 | -4 | 2215.92 | 23.66 |
| 1 | 5 | -4 | 2393.48 | 24.82 |
| 1 | 5 | -4 | 2341.04 | 24.18 |
| 1 | 5 | -4 | 2624.69 | 23.87 |
| 1 | 5 | -4 | 2556.11 | 25.86 |
| 1 | 5 | -4 | 2197.86 | 26.83 |
| 1 | 5 | -4 | 2526.44 | 24.86 |
| 1 | 5 | -3 | 587.71  | 8.78  |
| 1 | 5 | -3 | 621.28  | 7.91  |
| 1 | 5 | -3 | 598.38  | 8.20  |
| 1 | 5 | -3 | 618.28  | 9.42  |
| 1 | 5 | -3 | 578.97  | 9.20  |
| 1 | 5 | -3 | 497.93  | 8.76  |
| 1 | 5 | -3 | 557.23  | 8.20  |
| 1 | 5 | -3 | 608.18  | 8.20  |
| 1 | 5 | -3 | 561.49  | 7.58  |
| 1 | 5 | -3 | 617.02  | 9.28  |
| 1 | 5 | -3 | 546.85  | 10.35 |
| 1 | 5 | -3 | 582.93  | 9.05  |
| 1 | 5 | -3 | 608.20  | 8.44  |
| 1 | 5 | -2 | 256.83  | 5.03  |
| 1 | 5 | -2 | 228.96  | 4.31  |
| 1 | 5 | -2 | 244.32  | 4.68  |
| 1 | 5 | -2 | 268.65  | 5.71  |
| 1 | 5 | -2 | 253.61  | 5.59  |
| 1 | 5 | -2 | 228.17  | 4.53  |
| 1 | 5 | -2 | 208.06  | 3.84  |
| 1 | 5 | -2 | 238.17  | 5.20  |
| 1 | 5 | -2 | 239.91  | 5.51  |
| 1 | 5 | -2 | 247.86  | 4.03  |
| 1 | 5 | -2 | 240.08  | 4.75  |
| 1 | 5 | -1 | 1868.19 | 18.59 |
| 1 | 5 | -1 | 1703.74 | 18.53 |
| 1 | 5 | -1 | 1897.50 | 18.54 |
| 1 | 5 | -1 | 1755.77 | 19.66 |
| 1 | 5 | -1 | 1840.84 | 20.19 |
| 1 | 5 | -1 | 1742.66 | 16.87 |
| 1 | 5 | -1 | 1750.88 | 18.31 |
| 1 | 5 | -1 | 1716.78 | 18.93 |
| 1 | 5 | -1 | 1693.89 | 21.80 |
| 1 | 5 | -1 | 1950.94 | 20.86 |

## CIF 31

|   |   |    |         |       |
|---|---|----|---------|-------|
| 1 | 5 | -1 | 1879.51 | 17.30 |
| 1 | 5 | 0  | 68.40   | 2.19  |
| 1 | 5 | 0  | 62.65   | 2.24  |
| 1 | 5 | 0  | 55.96   | 2.33  |
| 1 | 5 | 0  | 73.36   | 2.78  |
| 1 | 5 | 0  | 69.34   | 2.83  |
| 1 | 5 | 0  | 66.45   | 2.41  |
| 1 | 5 | 0  | 65.71   | 2.37  |
| 1 | 5 | 0  | 75.51   | 2.59  |
| 1 | 5 | 0  | 59.73   | 3.21  |
| 1 | 5 | 0  | 69.48   | 2.00  |
| 1 | 5 | 1  | 66.85   | 2.37  |
| 1 | 5 | 1  | 64.20   | 2.55  |
| 1 | 5 | 1  | 66.48   | 2.79  |
| 1 | 5 | 1  | 68.84   | 2.01  |
| 1 | 5 | 1  | 65.96   | 2.48  |
| 1 | 5 | 2  | 53.97   | 2.27  |
| 1 | 5 | 2  | 62.50   | 2.50  |
| 1 | 5 | 2  | 53.64   | 2.49  |
| 1 | 5 | 2  | 57.82   | 3.06  |
| 1 | 5 | 2  | 55.65   | 1.90  |
| 1 | 5 | 3  | 621.35  | 9.18  |
| 1 | 5 | 3  | 638.82  | 9.46  |
| 1 | 5 | 3  | 590.04  | 10.77 |
| 1 | 5 | 3  | 572.31  | 7.95  |
| 1 | 5 | 4  | 3006.48 | 28.62 |
| 1 | 5 | 4  | 2727.61 | 29.06 |
| 1 | 5 | 4  | 2819.95 | 31.38 |
| 1 | 5 | 4  | 2695.67 | 26.84 |
| 1 | 5 | 4  | 2925.79 | 29.05 |
| 1 | 5 | 5  | 33.92   | 2.38  |
| 1 | 5 | 5  | 40.48   | 2.28  |
| 1 | 5 | 5  | 24.37   | 2.25  |
| 1 | 5 | 5  | 27.53   | 1.65  |
| 1 | 5 | 5  | 32.04   | 2.16  |
| 1 | 5 | 6  | 127.57  | 4.01  |
| 1 | 5 | 6  | 103.75  | 4.67  |
| 1 | 5 | 6  | 101.84  | 4.16  |
| 1 | 5 | 6  | 141.81  | 4.44  |
| 1 | 5 | 6  | 117.41  | 4.16  |
| 1 | 5 | 7  | 4.79    | 0.98  |

## CIF 31

|   |   |     |        |      |
|---|---|-----|--------|------|
| 1 | 5 | 7   | 3.58   | 1.23 |
| 1 | 5 | 7   | 6.14   | 1.12 |
| 1 | 5 | 7   | 2.99   | 1.32 |
| 1 | 5 | 8   | 30.91  | 2.20 |
| 1 | 5 | 8   | 40.63  | 2.26 |
| 1 | 5 | 8   | 43.30  | 2.45 |
| 1 | 5 | 8   | 30.85  | 2.43 |
| 1 | 5 | 9   | 16.48  | 1.82 |
| 1 | 5 | 10  | 199.94 | 4.72 |
| 1 | 6 | -15 | 38.48  | 1.86 |
| 1 | 6 | -14 | 6.41   | 1.44 |
| 1 | 6 | -14 | 6.06   | 1.18 |
| 1 | 6 | -13 | 37.17  | 1.76 |
| 1 | 6 | -13 | 41.79  | 3.16 |
| 1 | 6 | -13 | 45.52  | 2.96 |
| 1 | 6 | -12 | 88.62  | 4.79 |
| 1 | 6 | -12 | 88.43  | 4.40 |
| 1 | 6 | -12 | 81.90  | 4.23 |
| 1 | 6 | -11 | 278.53 | 8.75 |
| 1 | 6 | -11 | 302.95 | 8.61 |
| 1 | 6 | -11 | 290.76 | 8.32 |
| 1 | 6 | -11 | 311.41 | 6.15 |
| 1 | 6 | -11 | 288.78 | 7.42 |
| 1 | 6 | -11 | 279.32 | 7.80 |
| 1 | 6 | -10 | 318.85 | 8.92 |
| 1 | 6 | -10 | 328.14 | 8.92 |
| 1 | 6 | -10 | 350.09 | 6.68 |
| 1 | 6 | -10 | 346.49 | 8.54 |
| 1 | 6 | -10 | 336.32 | 8.85 |
| 1 | 6 | -9  | 382.44 | 9.29 |
| 1 | 6 | -9  | 350.34 | 9.31 |
| 1 | 6 | -9  | 382.50 | 9.80 |
| 1 | 6 | -9  | 384.80 | 9.65 |
| 1 | 6 | -9  | 400.11 | 7.22 |
| 1 | 6 | -9  | 368.04 | 8.86 |
| 1 | 6 | -9  | 415.13 | 8.06 |
| 1 | 6 | -9  | 376.24 | 9.35 |
| 1 | 6 | -8  | 25.87  | 2.26 |
| 1 | 6 | -8  | 23.13  | 2.45 |
| 1 | 6 | -8  | 24.11  | 2.51 |
| 1 | 6 | -8  | 19.96  | 1.96 |

## CIF 31

|   |   |    |        |      |
|---|---|----|--------|------|
| 1 | 6 | -8 | 24.59  | 2.45 |
| 1 | 6 | -8 | 20.91  | 1.83 |
| 1 | 6 | -8 | 24.67  | 2.20 |
| 1 | 6 | -8 | 30.82  | 2.71 |
| 1 | 6 | -7 | 215.47 | 5.98 |
| 1 | 6 | -7 | 203.15 | 4.58 |
| 1 | 6 | -7 | 169.11 | 5.87 |
| 1 | 6 | -7 | 227.95 | 6.72 |
| 1 | 6 | -7 | 201.53 | 5.64 |
| 1 | 6 | -7 | 247.99 | 6.01 |
| 1 | 6 | -7 | 219.57 | 5.63 |
| 1 | 6 | -7 | 215.13 | 5.98 |
| 1 | 6 | -7 | 211.15 | 6.30 |
| 1 | 6 | -7 | 213.98 | 6.38 |
| 1 | 6 | -7 | 224.80 | 5.45 |
| 1 | 6 | -7 | 184.04 | 5.94 |
| 1 | 6 | -7 | 180.35 | 6.00 |
| 1 | 6 | -7 | 221.17 | 5.79 |
| 1 | 6 | -7 | 218.43 | 6.57 |
| 1 | 6 | -6 | 166.74 | 5.24 |
| 1 | 6 | -6 | 171.01 | 5.49 |
| 1 | 6 | -6 | 154.74 | 3.89 |
| 1 | 6 | -6 | 161.96 | 5.27 |
| 1 | 6 | -6 | 163.98 | 4.71 |
| 1 | 6 | -6 | 174.28 | 5.20 |
| 1 | 6 | -6 | 168.33 | 4.94 |
| 1 | 6 | -6 | 169.85 | 5.25 |
| 1 | 6 | -6 | 151.93 | 4.60 |
| 1 | 6 | -6 | 175.13 | 5.52 |
| 1 | 6 | -6 | 174.47 | 5.51 |
| 1 | 6 | -6 | 158.62 | 5.20 |
| 1 | 6 | -6 | 162.85 | 4.47 |
| 1 | 6 | -6 | 157.61 | 5.18 |
| 1 | 6 | -6 | 173.54 | 4.76 |
| 1 | 6 | -6 | 158.99 | 5.07 |
| 1 | 6 | -5 | 38.26  | 2.50 |
| 1 | 6 | -5 | 37.48  | 1.85 |
| 1 | 6 | -5 | 36.29  | 2.40 |
| 1 | 6 | -5 | 40.27  | 2.23 |
| 1 | 6 | -5 | 45.91  | 2.61 |
| 1 | 6 | -5 | 37.45  | 2.45 |

## CIF 31

|   |   |    |         |       |
|---|---|----|---------|-------|
| 1 | 6 | -5 | 34.78   | 2.39  |
| 1 | 6 | -5 | 44.12   | 2.43  |
| 1 | 6 | -5 | 36.80   | 2.44  |
| 1 | 6 | -5 | 37.72   | 2.54  |
| 1 | 6 | -5 | 43.01   | 2.25  |
| 1 | 6 | -5 | 30.56   | 2.17  |
| 1 | 6 | -5 | 35.69   | 2.04  |
| 1 | 6 | -5 | 32.79   | 2.44  |
| 1 | 6 | -5 | 35.79   | 2.18  |
| 1 | 6 | -4 | 530.60  | 8.46  |
| 1 | 6 | -4 | 466.33  | 9.15  |
| 1 | 6 | -4 | 456.34  | 8.63  |
| 1 | 6 | -4 | 480.49  | 7.43  |
| 1 | 6 | -4 | 496.67  | 8.77  |
| 1 | 6 | -4 | 518.69  | 9.57  |
| 1 | 6 | -4 | 507.09  | 9.30  |
| 1 | 6 | -4 | 525.92  | 9.28  |
| 1 | 6 | -4 | 492.48  | 9.39  |
| 1 | 6 | -4 | 552.02  | 9.69  |
| 1 | 6 | -4 | 548.10  | 8.42  |
| 1 | 6 | -4 | 506.81  | 8.36  |
| 1 | 6 | -4 | 533.08  | 8.59  |
| 1 | 6 | -4 | 484.69  | 7.73  |
| 1 | 6 | -4 | 514.78  | 9.49  |
| 1 | 6 | -4 | 518.56  | 9.02  |
| 1 | 6 | -3 | 1477.31 | 18.91 |
| 1 | 6 | -3 | 1518.76 | 18.08 |
| 1 | 6 | -3 | 1625.69 | 16.97 |
| 1 | 6 | -3 | 1641.59 | 17.78 |
| 1 | 6 | -3 | 1603.03 | 19.56 |
| 1 | 6 | -3 | 1605.97 | 19.36 |
| 1 | 6 | -3 | 1571.69 | 18.49 |
| 1 | 6 | -3 | 1706.21 | 19.61 |
| 1 | 6 | -3 | 1480.17 | 17.18 |
| 1 | 6 | -3 | 1463.63 | 16.32 |
| 1 | 6 | -3 | 1529.48 | 19.04 |
| 1 | 6 | -3 | 1597.87 | 17.92 |
| 1 | 6 | -3 | 1561.00 | 19.02 |
| 1 | 6 | -2 | 754.84  | 11.82 |
| 1 | 6 | -2 | 758.49  | 10.74 |
| 1 | 6 | -2 | 732.82  | 9.85  |

## CIF 31

|   |   |    |        |       |
|---|---|----|--------|-------|
| 1 | 6 | -2 | 749.58 | 10.43 |
| 1 | 6 | -2 | 820.05 | 11.99 |
| 1 | 6 | -2 | 719.62 | 10.65 |
| 1 | 6 | -2 | 782.35 | 11.81 |
| 1 | 6 | -2 | 762.90 | 11.97 |
| 1 | 6 | -2 | 795.16 | 10.57 |
| 1 | 6 | -2 | 721.98 | 9.12  |
| 1 | 6 | -2 | 818.79 | 11.73 |
| 1 | 6 | -2 | 751.82 | 12.11 |
| 1 | 6 | -2 | 869.06 | 11.13 |
| 1 | 6 | -1 | 12.77  | 1.55  |
| 1 | 6 | -1 | 14.38  | 1.40  |
| 1 | 6 | -1 | 11.04  | 1.10  |
| 1 | 6 | -1 | 12.16  | 1.26  |
| 1 | 6 | -1 | 12.37  | 1.65  |
| 1 | 6 | -1 | 11.61  | 1.38  |
| 1 | 6 | -1 | 12.84  | 1.46  |
| 1 | 6 | -1 | 11.80  | 1.49  |
| 1 | 6 | -1 | 13.37  | 1.34  |
| 1 | 6 | -1 | 10.45  | 1.24  |
| 1 | 6 | -1 | 17.81  | 1.90  |
| 1 | 6 | -1 | 13.98  | 1.00  |
| 1 | 6 | 0  | 21.60  | 1.71  |
| 1 | 6 | 0  | 23.52  | 1.67  |
| 1 | 6 | 0  | 24.82  | 2.11  |
| 1 | 6 | 0  | 27.25  | 1.99  |
| 1 | 6 | 0  | 24.69  | 1.82  |
| 1 | 6 | 0  | 27.49  | 2.05  |
| 1 | 6 | 0  | 29.54  | 1.85  |
| 1 | 6 | 0  | 25.67  | 1.69  |
| 1 | 6 | 0  | 23.12  | 2.30  |
| 1 | 6 | 0  | 29.47  | 1.42  |
| 1 | 6 | 1  | 4.60   | 1.09  |
| 1 | 6 | 1  | 4.07   | 0.86  |
| 1 | 6 | 1  | 4.94   | 1.10  |
| 1 | 6 | 1  | 4.12   | 1.20  |
| 1 | 6 | 1  | 4.05   | 1.00  |
| 1 | 6 | 1  | 3.42   | 0.90  |
| 1 | 6 | 1  | 4.51   | 0.91  |
| 1 | 6 | 1  | 9.00   | 1.24  |
| 1 | 6 | 1  | 3.87   | 0.97  |

## CIF 31

|   |   |     |         |       |
|---|---|-----|---------|-------|
| 1 | 6 | 1   | 4.74    | 0.72  |
| 1 | 6 | 1   | 4.62    | 1.39  |
| 1 | 6 | 2   | 3809.19 | 38.83 |
| 1 | 6 | 2   | 3873.54 | 38.01 |
| 1 | 6 | 2   | 4015.07 | 40.58 |
| 1 | 6 | 2   | 3919.95 | 40.33 |
| 1 | 6 | 2   | 3756.35 | 38.85 |
| 1 | 6 | 2   | 4264.60 | 39.03 |
| 1 | 6 | 2   | 4391.23 | 39.12 |
| 1 | 6 | 2   | 4060.55 | 42.01 |
| 1 | 6 | 3   | 156.01  | 4.57  |
| 1 | 6 | 3   | 155.17  | 5.02  |
| 1 | 6 | 3   | 156.14  | 4.59  |
| 1 | 6 | 4   | 470.73  | 8.98  |
| 1 | 6 | 4   | 481.49  | 10.46 |
| 1 | 6 | 5   | 168.37  | 5.05  |
| 1 | 6 | 5   | 188.41  | 5.06  |
| 1 | 6 | 5   | 167.53  | 5.03  |
| 1 | 6 | 5   | 153.34  | 5.91  |
| 1 | 6 | 5   | 143.98  | 5.34  |
| 1 | 6 | 6   | 485.32  | 8.54  |
| 1 | 6 | 6   | 478.13  | 10.32 |
| 1 | 6 | 6   | 427.86  | 9.03  |
| 1 | 6 | 6   | 447.90  | 10.31 |
| 1 | 6 | 7   | 101.27  | 3.48  |
| 1 | 6 | 7   | 92.69   | 3.57  |
| 1 | 6 | 7   | 80.58   | 3.78  |
| 1 | 6 | 7   | 76.82   | 3.93  |
| 1 | 6 | 8   | 26.05   | 2.11  |
| 1 | 6 | 9   | 243.89  | 5.53  |
| 1 | 7 | -15 | 123.39  | 2.92  |
| 1 | 7 | -14 | 151.26  | 4.94  |
| 1 | 7 | -14 | 145.91  | 3.70  |
| 1 | 7 | -13 | 31.89   | 2.76  |
| 1 | 7 | -13 | 30.33   | 2.36  |
| 1 | 7 | -13 | 26.22   | 1.35  |
| 1 | 7 | -13 | 30.12   | 1.95  |
| 1 | 7 | -12 | 34.93   | 2.77  |
| 1 | 7 | -12 | 33.30   | 2.85  |
| 1 | 7 | -12 | 30.23   | 1.70  |
| 1 | 7 | -12 | 37.53   | 2.31  |



## CIF 31

|   |   |     |         |       |
|---|---|-----|---------|-------|
| 1 | 7 | -11 | 245.03  | 8.07  |
| 1 | 7 | -11 | 257.98  | 6.83  |
| 1 | 7 | -11 | 264.42  | 8.04  |
| 1 | 7 | -11 | 245.39  | 5.34  |
| 1 | 7 | -11 | 248.00  | 6.96  |
| 1 | 7 | -11 | 248.46  | 7.40  |
| 1 | 7 | -10 | 205.17  | 5.01  |
| 1 | 7 | -10 | 193.65  | 6.52  |
| 1 | 7 | -10 | 208.29  | 6.97  |
| 1 | 7 | -10 | 202.15  | 7.24  |
| 1 | 7 | -9  | 22.54   | 2.63  |
| 1 | 7 | -9  | 27.13   | 2.65  |
| 1 | 7 | -9  | 26.76   | 2.05  |
| 1 | 7 | -9  | 23.65   | 2.60  |
| 1 | 7 | -8  | 945.51  | 15.13 |
| 1 | 7 | -8  | 915.72  | 15.65 |
| 1 | 7 | -8  | 795.85  | 15.23 |
| 1 | 7 | -8  | 1000.41 | 14.60 |
| 1 | 7 | -8  | 962.57  | 14.41 |
| 1 | 7 | -8  | 986.64  | 14.89 |
| 1 | 7 | -8  | 964.75  | 13.91 |
| 1 | 7 | -8  | 938.04  | 16.13 |
| 1 | 7 | -8  | 980.99  | 16.09 |
| 1 | 7 | -8  | 971.56  | 13.51 |
| 1 | 7 | -8  | 863.33  | 13.86 |
| 1 | 7 | -8  | 1006.64 | 16.56 |
| 1 | 7 | -7  | 787.08  | 13.27 |
| 1 | 7 | -7  | 769.90  | 13.65 |
| 1 | 7 | -7  | 765.01  | 12.97 |
| 1 | 7 | -7  | 780.65  | 13.39 |
| 1 | 7 | -7  | 784.69  | 12.71 |
| 1 | 7 | -7  | 751.72  | 13.72 |
| 1 | 7 | -7  | 722.02  | 13.45 |
| 1 | 7 | -7  | 774.09  | 13.92 |
| 1 | 7 | -7  | 761.63  | 11.84 |
| 1 | 7 | -7  | 801.11  | 12.49 |
| 1 | 7 | -6  | 877.50  | 14.11 |
| 1 | 7 | -6  | 777.09  | 13.57 |
| 1 | 7 | -6  | 842.69  | 12.55 |
| 1 | 7 | -6  | 922.75  | 14.40 |
| 1 | 7 | -6  | 855.56  | 12.65 |

## CIF 31

|   |   |    |         |       |
|---|---|----|---------|-------|
| 1 | 7 | -6 | 851.53  | 13.87 |
| 1 | 7 | -6 | 875.51  | 14.44 |
| 1 | 7 | -6 | 837.54  | 13.40 |
| 1 | 7 | -6 | 835.02  | 13.75 |
| 1 | 7 | -6 | 838.02  | 12.83 |
| 1 | 7 | -6 | 775.31  | 13.61 |
| 1 | 7 | -6 | 794.86  | 13.93 |
| 1 | 7 | -6 | 850.09  | 12.17 |
| 1 | 7 | -6 | 751.23  | 11.96 |
| 1 | 7 | -6 | 857.62  | 14.65 |
| 1 | 7 | -6 | 821.57  | 12.14 |
| 1 | 7 | -5 | 57.88   | 3.37  |
| 1 | 7 | -5 | 55.05   | 3.28  |
| 1 | 7 | -5 | 55.12   | 3.15  |
| 1 | 7 | -5 | 42.47   | 2.16  |
| 1 | 7 | -5 | 52.22   | 3.02  |
| 1 | 7 | -5 | 56.96   | 3.26  |
| 1 | 7 | -5 | 56.51   | 3.25  |
| 1 | 7 | -5 | 53.39   | 3.13  |
| 1 | 7 | -5 | 45.10   | 2.73  |
| 1 | 7 | -5 | 43.86   | 2.63  |
| 1 | 7 | -5 | 49.73   | 3.21  |
| 1 | 7 | -5 | 49.04   | 2.66  |
| 1 | 7 | -5 | 43.47   | 2.46  |
| 1 | 7 | -5 | 48.82   | 2.59  |
| 1 | 7 | -5 | 58.53   | 3.48  |
| 1 | 7 | -5 | 56.96   | 3.02  |
| 1 | 7 | -4 | 3192.60 | 34.09 |
| 1 | 7 | -4 | 3540.70 | 32.09 |
| 1 | 7 | -4 | 3123.01 | 32.72 |
| 1 | 7 | -4 | 3507.64 | 36.18 |
| 1 | 7 | -4 | 3400.58 | 35.44 |
| 1 | 7 | -4 | 3164.85 | 34.21 |
| 1 | 7 | -4 | 3345.48 | 35.61 |
| 1 | 7 | -4 | 3237.69 | 32.84 |
| 1 | 7 | -4 | 3506.96 | 33.85 |
| 1 | 7 | -4 | 3364.92 | 33.61 |
| 1 | 7 | -4 | 2996.17 | 31.42 |
| 1 | 7 | -4 | 3332.88 | 35.47 |
| 1 | 7 | -4 | 3035.48 | 34.09 |
| 1 | 7 | -3 | 4.07    | 1.36  |

## CIF 31

|   |   |    |        |      |
|---|---|----|--------|------|
| 1 | 7 | -3 | 6.46   | 1.18 |
| 1 | 7 | -3 | 8.58   | 1.14 |
| 1 | 7 | -3 | 1.97   | 1.30 |
| 1 | 7 | -3 | 7.65   | 1.69 |
| 1 | 7 | -3 | 5.23   | 1.32 |
| 1 | 7 | -3 | 3.79   | 1.10 |
| 1 | 7 | -3 | 5.19   | 1.15 |
| 1 | 7 | -3 | 4.89   | 1.43 |
| 1 | 7 | -3 | 4.48   | 1.24 |
| 1 | 7 | -3 | 2.86   | 1.10 |
| 1 | 7 | -3 | 4.76   | 1.11 |
| 1 | 7 | -3 | 3.23   | 0.77 |
| 1 | 7 | -3 | 3.05   | 1.10 |
| 1 | 7 | -3 | 6.39   | 1.22 |
| 1 | 7 | -3 | 3.66   | 1.30 |
| 1 | 7 | -2 | 428.55 | 9.22 |
| 1 | 7 | -2 | 405.10 | 7.63 |
| 1 | 7 | -2 | 410.89 | 7.28 |
| 1 | 7 | -2 | 450.21 | 8.17 |
| 1 | 7 | -2 | 433.57 | 9.02 |
| 1 | 7 | -2 | 424.17 | 8.83 |
| 1 | 7 | -2 | 440.94 | 9.33 |
| 1 | 7 | -2 | 439.98 | 9.22 |
| 1 | 7 | -2 | 440.76 | 8.01 |
| 1 | 7 | -2 | 443.79 | 8.73 |
| 1 | 7 | -2 | 436.12 | 9.52 |
| 1 | 7 | -2 | 437.55 | 8.19 |
| 1 | 7 | -1 | 340.43 | 7.80 |
| 1 | 7 | -1 | 320.63 | 6.47 |
| 1 | 7 | -1 | 333.65 | 8.19 |
| 1 | 7 | -1 | 316.03 | 7.52 |
| 1 | 7 | -1 | 324.52 | 7.37 |
| 1 | 7 | -1 | 335.72 | 7.88 |
| 1 | 7 | -1 | 319.61 | 6.76 |
| 1 | 7 | -1 | 311.87 | 6.89 |
| 1 | 7 | -1 | 343.64 | 8.56 |
| 1 | 7 | -1 | 327.45 | 7.04 |
| 1 | 7 | 0  | 71.26  | 3.49 |
| 1 | 7 | 0  | 63.79  | 3.00 |
| 1 | 7 | 0  | 65.48  | 2.92 |
| 1 | 7 | 0  | 76.51  | 4.01 |

## CIF 31

|   |   |   |         |       |
|---|---|---|---------|-------|
| 1 | 7 | 0 | 68.55   | 3.66  |
| 1 | 7 | 0 | 68.32   | 3.36  |
| 1 | 7 | 0 | 71.87   | 3.27  |
| 1 | 7 | 0 | 67.32   | 3.48  |
| 1 | 7 | 0 | 71.41   | 3.04  |
| 1 | 7 | 0 | 69.43   | 4.00  |
| 1 | 7 | 1 | 37.64   | 2.55  |
| 1 | 7 | 1 | 30.73   | 2.23  |
| 1 | 7 | 1 | 32.27   | 2.15  |
| 1 | 7 | 1 | 39.66   | 2.95  |
| 1 | 7 | 1 | 33.20   | 2.73  |
| 1 | 7 | 1 | 33.74   | 2.34  |
| 1 | 7 | 1 | 37.80   | 2.55  |
| 1 | 7 | 1 | 31.94   | 2.20  |
| 1 | 7 | 1 | 31.86   | 2.99  |
| 1 | 7 | 2 | 1185.55 | 16.35 |
| 1 | 7 | 2 | 1391.43 | 16.73 |
| 1 | 7 | 2 | 1350.68 | 16.97 |
| 1 | 7 | 2 | 1224.82 | 17.91 |
| 1 | 7 | 2 | 1250.11 | 17.91 |
| 1 | 7 | 2 | 1249.60 | 16.74 |
| 1 | 7 | 2 | 1407.95 | 17.00 |
| 1 | 7 | 2 | 1325.12 | 19.57 |
| 1 | 7 | 3 | 9.58    | 1.30  |
| 1 | 7 | 3 | 8.56    | 1.61  |
| 1 | 7 | 3 | 7.93    | 1.46  |
| 1 | 7 | 3 | 8.71    | 1.39  |
| 1 | 7 | 3 | 8.17    | 1.32  |
| 1 | 7 | 3 | 7.52    | 1.90  |
| 1 | 7 | 3 | 9.46    | 1.81  |
| 1 | 7 | 4 | 349.38  | 8.11  |
| 1 | 7 | 4 | 372.53  | 9.67  |
| 1 | 7 | 4 | 358.22  | 7.67  |
| 1 | 7 | 4 | 363.10  | 9.03  |
| 1 | 7 | 5 | 55.90   | 2.71  |
| 1 | 7 | 5 | 45.07   | 3.28  |
| 1 | 7 | 5 | 50.59   | 2.73  |
| 1 | 7 | 5 | 47.98   | 3.07  |
| 1 | 7 | 5 | 44.97   | 3.30  |
| 1 | 7 | 6 | 0.37    | 1.00  |
| 1 | 7 | 6 | 1.27    | 0.78  |

## CIF 31

|   |   |     |        |       |
|---|---|-----|--------|-------|
| 1 | 7 | 6   | 1.68   | 0.85  |
| 1 | 7 | 6   | 1.47   | 1.10  |
| 1 | 7 | 7   | 15.87  | 1.65  |
| 1 | 7 | 7   | 14.05  | 1.55  |
| 1 | 7 | 7   | 14.68  | 1.72  |
| 1 | 7 | 8   | 35.54  | 2.19  |
| 1 | 7 | 8   | 34.55  | 1.76  |
| 1 | 8 | -14 | 181.44 | 4.12  |
| 1 | 8 | -14 | 183.62 | 3.58  |
| 1 | 8 | -13 | 1.76   | 1.16  |
| 1 | 8 | -13 | 2.40   | 0.84  |
| 1 | 8 | -12 | 31.17  | 2.65  |
| 1 | 8 | -12 | 25.74  | 1.43  |
| 1 | 8 | -12 | 26.75  | 2.00  |
| 1 | 8 | -11 | 170.92 | 6.32  |
| 1 | 8 | -11 | 159.66 | 5.74  |
| 1 | 8 | -11 | 172.46 | 5.47  |
| 1 | 8 | -11 | 171.70 | 4.09  |
| 1 | 8 | -11 | 166.18 | 5.61  |
| 1 | 8 | -11 | 155.23 | 5.72  |
| 1 | 8 | -10 | 55.91  | 3.84  |
| 1 | 8 | -10 | 58.06  | 3.85  |
| 1 | 8 | -10 | 65.29  | 2.67  |
| 1 | 8 | -10 | 57.42  | 3.63  |
| 1 | 8 | -10 | 54.52  | 3.62  |
| 1 | 8 | -9  | 7.94   | 1.84  |
| 1 | 8 | -9  | 5.94   | 1.36  |
| 1 | 8 | -9  | 7.93   | 1.87  |
| 1 | 8 | -9  | 5.37   | 1.63  |
| 1 | 8 | -9  | 6.69   | 1.69  |
| 1 | 8 | -8  | 4.34   | 1.50  |
| 1 | 8 | -8  | 4.87   | 1.28  |
| 1 | 8 | -8  | 4.87   | 1.44  |
| 1 | 8 | -8  | 3.29   | 1.30  |
| 1 | 8 | -8  | 3.42   | 1.38  |
| 1 | 8 | -8  | 3.33   | 1.15  |
| 1 | 8 | -8  | 3.32   | 1.60  |
| 1 | 8 | -8  | 1.93   | 1.49  |
| 1 | 8 | -8  | 2.82   | 1.01  |
| 1 | 8 | -7  | 580.91 | 11.61 |
| 1 | 8 | -7  | 562.40 | 11.54 |

## CIF 31

|   |   |    |        |       |
|---|---|----|--------|-------|
| 1 | 8 | -7 | 586.13 | 11.61 |
| 1 | 8 | -7 | 575.01 | 11.32 |
| 1 | 8 | -7 | 551.60 | 11.55 |
| 1 | 8 | -7 | 582.45 | 10.71 |
| 1 | 8 | -7 | 582.89 | 11.11 |
| 1 | 8 | -7 | 601.02 | 12.08 |
| 1 | 8 | -7 | 594.22 | 12.33 |
| 1 | 8 | -7 | 598.14 | 10.06 |
| 1 | 8 | -7 | 500.33 | 9.68  |
| 1 | 8 | -7 | 529.05 | 11.83 |
| 1 | 8 | -6 | 11.10  | 2.01  |
| 1 | 8 | -6 | 8.79   | 1.59  |
| 1 | 8 | -6 | 7.92   | 1.46  |
| 1 | 8 | -6 | 9.28   | 1.85  |
| 1 | 8 | -6 | 14.07  | 2.09  |
| 1 | 8 | -6 | 12.94  | 1.88  |
| 1 | 8 | -6 | 13.07  | 1.73  |
| 1 | 8 | -6 | 11.04  | 1.61  |
| 1 | 8 | -6 | 10.49  | 1.47  |
| 1 | 8 | -6 | 10.24  | 1.43  |
| 1 | 8 | -6 | 10.47  | 1.46  |
| 1 | 8 | -6 | 9.69   | 1.85  |
| 1 | 8 | -6 | 11.13  | 1.88  |
| 1 | 8 | -6 | 12.31  | 1.56  |
| 1 | 8 | -5 | 396.13 | 9.02  |
| 1 | 8 | -5 | 461.14 | 8.90  |
| 1 | 8 | -5 | 445.65 | 10.10 |
| 1 | 8 | -5 | 465.41 | 10.71 |
| 1 | 8 | -5 | 479.38 | 10.18 |
| 1 | 8 | -5 | 421.76 | 9.27  |
| 1 | 8 | -5 | 410.46 | 9.22  |
| 1 | 8 | -5 | 430.17 | 8.84  |
| 1 | 8 | -5 | 436.48 | 10.25 |
| 1 | 8 | -5 | 441.94 | 8.46  |
| 1 | 8 | -5 | 394.42 | 7.71  |
| 1 | 8 | -5 | 432.20 | 10.08 |
| 1 | 8 | -5 | 452.84 | 9.28  |
| 1 | 8 | -4 | 404.05 | 9.50  |
| 1 | 8 | -4 | 390.16 | 8.51  |
| 1 | 8 | -4 | 405.72 | 7.32  |
| 1 | 8 | -4 | 389.92 | 8.10  |

## CIF 31

|   |   |    |         |       |
|---|---|----|---------|-------|
| 1 | 8 | -4 | 425.09  | 10.01 |
| 1 | 8 | -4 | 413.42  | 10.13 |
| 1 | 8 | -4 | 389.26  | 9.32  |
| 1 | 8 | -4 | 408.04  | 9.39  |
| 1 | 8 | -4 | 412.98  | 9.21  |
| 1 | 8 | -4 | 376.87  | 8.51  |
| 1 | 8 | -4 | 426.00  | 9.70  |
| 1 | 8 | -4 | 435.79  | 8.77  |
| 1 | 8 | -4 | 414.93  | 8.14  |
| 1 | 8 | -4 | 397.82  | 8.42  |
| 1 | 8 | -4 | 409.38  | 9.42  |
| 1 | 8 | -4 | 417.84  | 9.33  |
| 1 | 8 | -3 | 20.59   | 2.26  |
| 1 | 8 | -3 | 20.60   | 1.68  |
| 1 | 8 | -3 | 23.41   | 1.96  |
| 1 | 8 | -3 | 18.43   | 2.41  |
| 1 | 8 | -3 | 22.20   | 2.43  |
| 1 | 8 | -3 | 16.62   | 2.05  |
| 1 | 8 | -3 | 16.15   | 2.03  |
| 1 | 8 | -3 | 20.79   | 2.36  |
| 1 | 8 | -3 | 20.57   | 1.84  |
| 1 | 8 | -3 | 19.70   | 2.12  |
| 1 | 8 | -3 | 21.29   | 1.96  |
| 1 | 8 | -3 | 17.16   | 1.97  |
| 1 | 8 | -3 | 19.20   | 2.27  |
| 1 | 8 | -3 | 17.82   | 1.79  |
| 1 | 8 | -2 | 978.46  | 15.45 |
| 1 | 8 | -2 | 885.05  | 12.77 |
| 1 | 8 | -2 | 974.39  | 13.81 |
| 1 | 8 | -2 | 1022.74 | 16.94 |
| 1 | 8 | -2 | 984.55  | 15.33 |
| 1 | 8 | -2 | 922.09  | 14.79 |
| 1 | 8 | -2 | 949.81  | 15.61 |
| 1 | 8 | -2 | 1006.89 | 13.85 |
| 1 | 8 | -2 | 913.71  | 15.27 |
| 1 | 8 | -2 | 938.99  | 14.36 |
| 1 | 8 | -2 | 1038.45 | 14.50 |
| 1 | 8 | -2 | 1003.53 | 16.25 |
| 1 | 8 | -2 | 896.56  | 14.31 |
| 1 | 8 | -1 | 1.68    | 1.12  |
| 1 | 8 | -1 | 0.86    | 0.94  |

## CIF 31

|   |   |    |         |       |
|---|---|----|---------|-------|
| 1 | 8 | -1 | 2.98    | 1.60  |
| 1 | 8 | -1 | 1.51    | 0.88  |
| 1 | 8 | -1 | 2.20    | 1.51  |
| 1 | 8 | -1 | 2.46    | 1.42  |
| 1 | 8 | -1 | 1.84    | 1.16  |
| 1 | 8 | -1 | 0.51    | 0.86  |
| 1 | 8 | -1 | 2.27    | 1.29  |
| 1 | 8 | -1 | 2.67    | 1.11  |
| 1 | 8 | -1 | 3.02    | 1.50  |
| 1 | 8 | -1 | 0.97    | 0.87  |
| 1 | 8 | -1 | 1.38    | 1.47  |
| 1 | 8 | 0  | 1960.24 | 24.01 |
| 1 | 8 | 0  | 1935.44 | 22.11 |
| 1 | 8 | 0  | 2066.08 | 22.97 |
| 1 | 8 | 0  | 2098.63 | 26.62 |
| 1 | 8 | 0  | 2126.44 | 26.35 |
| 1 | 8 | 0  | 1984.82 | 25.36 |
| 1 | 8 | 0  | 1888.27 | 23.51 |
| 1 | 8 | 0  | 1902.43 | 24.18 |
| 1 | 8 | 0  | 1987.10 | 26.24 |
| 1 | 8 | 0  | 1984.35 | 22.98 |
| 1 | 8 | 0  | 1949.62 | 26.15 |
| 1 | 8 | 0  | 2059.28 | 23.51 |
| 1 | 8 | 1  | 89.79   | 3.77  |
| 1 | 8 | 1  | 75.86   | 3.53  |
| 1 | 8 | 1  | 92.59   | 3.58  |
| 1 | 8 | 1  | 86.27   | 3.57  |
| 1 | 8 | 1  | 70.40   | 4.09  |
| 1 | 8 | 1  | 73.41   | 4.04  |
| 1 | 8 | 1  | 83.90   | 4.15  |
| 1 | 8 | 1  | 73.98   | 3.36  |
| 1 | 8 | 1  | 73.25   | 4.33  |
| 1 | 8 | 1  | 87.26   | 3.54  |
| 1 | 8 | 1  | 65.19   | 4.14  |
| 1 | 8 | 1  | 77.83   | 4.24  |
| 1 | 8 | 2  | 372.84  | 7.96  |
| 1 | 8 | 2  | 377.07  | 7.75  |
| 1 | 8 | 2  | 383.12  | 9.18  |
| 1 | 8 | 2  | 394.78  | 8.90  |
| 1 | 8 | 2  | 357.37  | 8.37  |
| 1 | 8 | 2  | 391.34  | 10.01 |



## CIF 31

|   |   |     |        |      |
|---|---|-----|--------|------|
| 1 | 8 | 2   | 409.21 | 8.06 |
| 1 | 8 | 2   | 385.50 | 9.67 |
| 1 | 8 | 2   | 353.63 | 9.31 |
| 1 | 8 | 3   | 7.57   | 1.32 |
| 1 | 8 | 3   | 8.25   | 1.28 |
| 1 | 8 | 3   | 7.50   | 1.56 |
| 1 | 8 | 3   | 7.76   | 1.33 |
| 1 | 8 | 3   | 8.55   | 1.32 |
| 1 | 8 | 3   | 7.17   | 1.66 |
| 1 | 8 | 3   | 6.48   | 1.72 |
| 1 | 8 | 4   | 94.81  | 3.50 |
| 1 | 8 | 4   | 89.45  | 3.61 |
| 1 | 8 | 4   | 93.39  | 4.52 |
| 1 | 8 | 4   | 98.24  | 3.67 |
| 1 | 8 | 4   | 84.47  | 4.09 |
| 1 | 8 | 4   | 85.79  | 4.38 |
| 1 | 8 | 5   | 46.81  | 2.97 |
| 1 | 8 | 5   | 38.96  | 2.28 |
| 1 | 8 | 5   | 49.10  | 2.63 |
| 1 | 8 | 5   | 43.51  | 2.92 |
| 1 | 8 | 5   | 40.65  | 2.51 |
| 1 | 8 | 5   | 44.81  | 3.04 |
| 1 | 8 | 6   | 1.38   | 0.98 |
| 1 | 8 | 6   | 1.84   | 0.88 |
| 1 | 8 | 6   | 1.64   | 0.94 |
| 1 | 8 | 7   | 181.92 | 4.77 |
| 1 | 8 | 7   | 196.05 | 4.31 |
| 1 | 9 | -13 | 6.00   | 1.07 |
| 1 | 9 | -13 | 6.29   | 0.98 |
| 1 | 9 | -13 | 6.05   | 0.79 |
| 1 | 9 | -12 | 8.95   | 1.41 |
| 1 | 9 | -12 | 10.58  | 1.44 |
| 1 | 9 | -12 | 9.56   | 0.74 |
| 1 | 9 | -12 | 12.97  | 1.19 |
| 1 | 9 | -11 | 11.72  | 1.83 |
| 1 | 9 | -11 | 11.23  | 1.67 |
| 1 | 9 | -11 | 13.21  | 1.62 |
| 1 | 9 | -11 | 12.16  | 1.58 |
| 1 | 9 | -11 | 12.06  | 1.89 |
| 1 | 9 | -11 | 12.00  | 1.06 |
| 1 | 9 | -11 | 11.36  | 1.54 |

## CIF 31

|   |   |     |        |      |
|---|---|-----|--------|------|
| 1 | 9 | -10 | 4.89   | 1.48 |
| 1 | 9 | -10 | 3.94   | 1.36 |
| 1 | 9 | -10 | 4.53   | 1.51 |
| 1 | 9 | -10 | 6.86   | 1.00 |
| 1 | 9 | -10 | 4.57   | 1.36 |
| 1 | 9 | -10 | 5.20   | 1.41 |
| 1 | 9 | -9  | 98.45  | 4.72 |
| 1 | 9 | -9  | 100.59 | 3.93 |
| 1 | 9 | -9  | 112.48 | 4.29 |
| 1 | 9 | -9  | 113.49 | 4.85 |
| 1 | 9 | -9  | 111.96 | 4.98 |
| 1 | 9 | -9  | 113.50 | 4.99 |
| 1 | 9 | -8  | 11.74  | 1.79 |
| 1 | 9 | -8  | 12.37  | 1.78 |
| 1 | 9 | -8  | 11.63  | 1.88 |
| 1 | 9 | -8  | 10.93  | 1.83 |
| 1 | 9 | -8  | 14.40  | 2.19 |
| 1 | 9 | -8  | 14.27  | 2.14 |
| 1 | 9 | -7  | 176.78 | 6.22 |
| 1 | 9 | -7  | 165.36 | 5.55 |
| 1 | 9 | -7  | 172.67 | 6.04 |
| 1 | 9 | -7  | 180.34 | 6.37 |
| 1 | 9 | -7  | 163.80 | 5.63 |
| 1 | 9 | -7  | 180.12 | 6.28 |
| 1 | 9 | -7  | 170.73 | 5.42 |
| 1 | 9 | -7  | 178.24 | 6.51 |
| 1 | 9 | -6  | 335.11 | 8.71 |
| 1 | 9 | -6  | 317.88 | 8.09 |
| 1 | 9 | -6  | 335.98 | 7.82 |
| 1 | 9 | -6  | 329.03 | 8.65 |
| 1 | 9 | -6  | 325.99 | 9.00 |
| 1 | 9 | -6  | 333.87 | 8.41 |
| 1 | 9 | -6  | 349.82 | 8.04 |
| 1 | 9 | -6  | 325.06 | 8.86 |
| 1 | 9 | -6  | 338.60 | 7.20 |
| 1 | 9 | -6  | 304.16 | 8.70 |
| 1 | 9 | -5  | 5.38   | 1.82 |
| 1 | 9 | -5  | 4.01   | 1.14 |
| 1 | 9 | -5  | 5.46   | 1.75 |
| 1 | 9 | -5  | 3.93   | 1.51 |
| 1 | 9 | -5  | 3.92   | 1.29 |

## CIF 31

|   |   |    |        |      |
|---|---|----|--------|------|
| 1 | 9 | -5 | 5.77   | 1.46 |
| 1 | 9 | -5 | 4.97   | 1.63 |
| 1 | 9 | -5 | 4.73   | 1.25 |
| 1 | 9 | -5 | 4.30   | 1.10 |
| 1 | 9 | -5 | 7.26   | 1.50 |
| 1 | 9 | -5 | 6.39   | 1.41 |
| 1 | 9 | -4 | 2.85   | 1.52 |
| 1 | 9 | -4 | 2.08   | 1.04 |
| 1 | 9 | -4 | 3.28   | 1.06 |
| 1 | 9 | -4 | 6.70   | 1.96 |
| 1 | 9 | -4 | 1.83   | 1.35 |
| 1 | 9 | -4 | 3.62   | 1.54 |
| 1 | 9 | -4 | 2.58   | 1.39 |
| 1 | 9 | -4 | 2.90   | 1.31 |
| 1 | 9 | -4 | 3.37   | 1.07 |
| 1 | 9 | -4 | 2.37   | 1.19 |
| 1 | 9 | -4 | 3.38   | 1.33 |
| 1 | 9 | -3 | 258.66 | 7.40 |
| 1 | 9 | -3 | 241.09 | 6.66 |
| 1 | 9 | -3 | 245.56 | 6.32 |
| 1 | 9 | -3 | 248.83 | 7.83 |
| 1 | 9 | -3 | 219.54 | 6.87 |
| 1 | 9 | -3 | 252.91 | 7.48 |
| 1 | 9 | -3 | 244.20 | 6.52 |
| 1 | 9 | -3 | 237.90 | 6.13 |
| 1 | 9 | -3 | 228.95 | 6.65 |
| 1 | 9 | -3 | 214.98 | 6.37 |
| 1 | 9 | -3 | 249.27 | 7.39 |
| 1 | 9 | -2 | 3.61   | 1.40 |
| 1 | 9 | -2 | 5.04   | 1.73 |
| 1 | 9 | -2 | 4.44   | 1.21 |
| 1 | 9 | -2 | 4.29   | 1.09 |
| 1 | 9 | -2 | 4.92   | 1.68 |
| 1 | 9 | -2 | 4.43   | 1.59 |
| 1 | 9 | -2 | 3.94   | 1.19 |
| 1 | 9 | -2 | 3.60   | 1.34 |
| 1 | 9 | -2 | 4.47   | 1.14 |
| 1 | 9 | -2 | 4.05   | 1.50 |
| 1 | 9 | -2 | 4.44   | 1.20 |
| 1 | 9 | -1 | 148.43 | 5.32 |
| 1 | 9 | -1 | 151.75 | 4.43 |

## CIF 31

|   |   |    |        |      |
|---|---|----|--------|------|
| 1 | 9 | -1 | 157.76 | 4.91 |
| 1 | 9 | -1 | 152.16 | 6.14 |
| 1 | 9 | -1 | 148.87 | 6.10 |
| 1 | 9 | -1 | 168.77 | 6.03 |
| 1 | 9 | -1 | 163.33 | 4.99 |
| 1 | 9 | -1 | 161.59 | 5.97 |
| 1 | 9 | -1 | 172.79 | 5.36 |
| 1 | 9 | -1 | 157.86 | 6.07 |
| 1 | 9 | -1 | 141.24 | 5.26 |
| 1 | 9 | 0  | 28.88  | 2.29 |
| 1 | 9 | 0  | 30.11  | 2.01 |
| 1 | 9 | 0  | 32.62  | 2.21 |
| 1 | 9 | 0  | 30.52  | 2.90 |
| 1 | 9 | 0  | 32.04  | 2.82 |
| 1 | 9 | 0  | 32.58  | 2.74 |
| 1 | 9 | 0  | 30.99  | 2.23 |
| 1 | 9 | 0  | 35.19  | 2.94 |
| 1 | 9 | 0  | 29.36  | 2.80 |
| 1 | 9 | 0  | 33.25  | 2.36 |
| 1 | 9 | 0  | 26.91  | 2.52 |
| 1 | 9 | 1  | 144.21 | 4.29 |
| 1 | 9 | 1  | 149.01 | 4.58 |
| 1 | 9 | 1  | 148.48 | 5.56 |
| 1 | 9 | 1  | 153.22 | 5.45 |
| 1 | 9 | 1  | 148.15 | 5.27 |
| 1 | 9 | 1  | 147.76 | 4.65 |
| 1 | 9 | 1  | 150.07 | 5.77 |
| 1 | 9 | 1  | 143.35 | 5.70 |
| 1 | 9 | 1  | 145.78 | 4.75 |
| 1 | 9 | 1  | 137.20 | 5.30 |
| 1 | 9 | 2  | 5.13   | 1.38 |
| 1 | 9 | 2  | 5.39   | 1.25 |
| 1 | 9 | 2  | 3.55   | 1.08 |
| 1 | 9 | 2  | 4.18   | 0.97 |
| 1 | 9 | 2  | 4.85   | 1.44 |
| 1 | 9 | 2  | 4.62   | 1.49 |
| 1 | 9 | 2  | 3.79   | 1.00 |
| 1 | 9 | 2  | 2.22   | 1.21 |
| 1 | 9 | 2  | 4.45   | 1.41 |
| 1 | 9 | 3  | 6.02   | 1.20 |
| 1 | 9 | 3  | 5.23   | 1.38 |

## CIF 31

|   |    |     |        |       |
|---|----|-----|--------|-------|
| 1 | 9  | 3   | 5.16   | 1.36  |
| 1 | 9  | 3   | 5.81   | 1.41  |
| 1 | 9  | 4   | 2.25   | 1.00  |
| 1 | 9  | 4   | 2.60   | 0.97  |
| 1 | 9  | 4   | 2.63   | 1.11  |
| 1 | 9  | 4   | 2.98   | 1.12  |
| 1 | 9  | 4   | 2.51   | 1.07  |
| 1 | 9  | 5   | 1.88   | 0.87  |
| 1 | 9  | 5   | 2.18   | 0.92  |
| 1 | 9  | 6   | 132.07 | 3.26  |
| 1 | 10 | -12 | 74.07  | 2.49  |
| 1 | 10 | -12 | 98.71  | 2.31  |
| 1 | 10 | -11 | 36.65  | 2.06  |
| 1 | 10 | -11 | 35.57  | 2.09  |
| 1 | 10 | -11 | 33.59  | 1.95  |
| 1 | 10 | -11 | 31.11  | 1.16  |
| 1 | 10 | -10 | 212.70 | 5.49  |
| 1 | 10 | -10 | 205.68 | 5.65  |
| 1 | 10 | -10 | 223.64 | 4.01  |
| 1 | 10 | -10 | 202.64 | 5.65  |
| 1 | 10 | -9  | 44.34  | 2.73  |
| 1 | 10 | -9  | 45.08  | 2.50  |
| 1 | 10 | -9  | 44.73  | 2.80  |
| 1 | 10 | -9  | 38.71  | 1.87  |
| 1 | 10 | -9  | 40.02  | 2.77  |
| 1 | 10 | -9  | 41.54  | 2.82  |
| 1 | 10 | -8  | 154.78 | 4.99  |
| 1 | 10 | -8  | 161.84 | 5.23  |
| 1 | 10 | -8  | 147.76 | 5.02  |
| 1 | 10 | -8  | 154.45 | 5.47  |
| 1 | 10 | -7  | 82.18  | 3.97  |
| 1 | 10 | -7  | 85.64  | 4.11  |
| 1 | 10 | -7  | 74.89  | 3.57  |
| 1 | 10 | -7  | 74.40  | 3.98  |
| 1 | 10 | -7  | 72.13  | 3.83  |
| 1 | 10 | -6  | 489.64 | 9.10  |
| 1 | 10 | -6  | 482.84 | 10.18 |
| 1 | 10 | -6  | 497.86 | 10.64 |
| 1 | 10 | -6  | 492.19 | 9.92  |
| 1 | 10 | -6  | 443.26 | 8.71  |
| 1 | 10 | -6  | 460.74 | 10.23 |

## CIF 31

|   |    |    |        |      |
|---|----|----|--------|------|
| 1 | 10 | -6 | 441.13 | 9.82 |
| 1 | 10 | -5 | 221.51 | 6.64 |
| 1 | 10 | -5 | 221.89 | 6.17 |
| 1 | 10 | -5 | 245.93 | 7.25 |
| 1 | 10 | -5 | 243.00 | 7.35 |
| 1 | 10 | -5 | 217.01 | 6.67 |
| 1 | 10 | -5 | 214.20 | 6.66 |
| 1 | 10 | -5 | 200.40 | 6.24 |
| 1 | 10 | -5 | 207.82 | 5.96 |
| 1 | 10 | -4 | 408.31 | 9.07 |
| 1 | 10 | -4 | 369.98 | 7.62 |
| 1 | 10 | -4 | 389.75 | 9.59 |
| 1 | 10 | -4 | 326.00 | 9.02 |
| 1 | 10 | -4 | 407.62 | 9.29 |
| 1 | 10 | -4 | 412.06 | 8.98 |
| 1 | 10 | -4 | 359.28 | 8.61 |
| 1 | 10 | -4 | 369.55 | 8.56 |
| 1 | 10 | -3 | 307.23 | 7.65 |
| 1 | 10 | -3 | 340.30 | 8.20 |
| 1 | 10 | -3 | 316.47 | 7.18 |
| 1 | 10 | -3 | 293.38 | 6.71 |
| 1 | 10 | -3 | 326.78 | 8.80 |
| 1 | 10 | -3 | 300.45 | 7.44 |
| 1 | 10 | -3 | 318.24 | 7.30 |
| 1 | 10 | -3 | 320.89 | 8.11 |
| 1 | 10 | -2 | 166.19 | 5.32 |
| 1 | 10 | -2 | 168.46 | 5.43 |
| 1 | 10 | -2 | 164.36 | 6.00 |
| 1 | 10 | -2 | 171.53 | 6.19 |
| 1 | 10 | -2 | 175.62 | 5.89 |
| 1 | 10 | -2 | 186.38 | 5.97 |
| 1 | 10 | -2 | 160.10 | 5.33 |
| 1 | 10 | -2 | 164.32 | 5.80 |
| 1 | 10 | -1 | 49.27  | 2.73 |
| 1 | 10 | -1 | 51.95  | 3.08 |
| 1 | 10 | -1 | 53.17  | 3.48 |
| 1 | 10 | -1 | 47.98  | 3.27 |
| 1 | 10 | -1 | 50.60  | 3.18 |
| 1 | 10 | -1 | 51.66  | 3.14 |
| 1 | 10 | -1 | 54.00  | 3.39 |
| 1 | 10 | -1 | 49.14  | 3.21 |

## CIF 31

|   |    |     |        |      |
|---|----|-----|--------|------|
| 1 | 10 | 0   | 3.51   | 1.31 |
| 1 | 10 | 0   | 3.33   | 1.29 |
| 1 | 10 | 0   | 3.33   | 1.25 |
| 1 | 10 | 0   | 3.16   | 1.13 |
| 1 | 10 | 0   | 3.02   | 1.25 |
| 1 | 10 | 0   | 6.26   | 1.51 |
| 1 | 10 | 0   | 2.58   | 1.06 |
| 1 | 10 | 1   | 54.18  | 3.08 |
| 1 | 10 | 1   | 56.55  | 2.98 |
| 1 | 10 | 1   | 48.52  | 2.59 |
| 1 | 10 | 1   | 51.63  | 2.64 |
| 1 | 10 | 1   | 55.88  | 3.13 |
| 1 | 10 | 1   | 45.74  | 2.89 |
| 1 | 10 | 1   | 48.13  | 2.92 |
| 1 | 10 | 1   | 48.60  | 2.78 |
| 1 | 10 | 2   | 51.96  | 2.83 |
| 1 | 10 | 2   | 49.66  | 2.47 |
| 1 | 10 | 2   | 54.69  | 2.80 |
| 1 | 10 | 2   | 47.24  | 2.55 |
| 1 | 10 | 2   | 52.82  | 2.86 |
| 1 | 10 | 3   | 0.37   | 0.72 |
| 1 | 10 | 3   | 1.69   | 0.85 |
| 1 | 10 | 3   | 1.43   | 0.80 |
| 1 | 10 | 4   | 3.25   | 0.78 |
| 1 | 11 | -10 | 31.73  | 1.82 |
| 1 | 11 | -10 | 28.38  | 1.67 |
| 1 | 11 | -9  | 26.05  | 1.59 |
| 1 | 11 | -9  | 32.11  | 1.24 |
| 1 | 11 | -8  | 13.40  | 1.28 |
| 1 | 11 | -8  | 16.40  | 1.47 |
| 1 | 11 | -8  | 15.77  | 1.57 |
| 1 | 11 | -8  | 16.22  | 1.64 |
| 1 | 11 | -7  | 1.10   | 0.73 |
| 1 | 11 | -7  | 1.72   | 0.95 |
| 1 | 11 | -7  | 2.12   | 1.07 |
| 1 | 11 | -7  | 1.83   | 0.91 |
| 1 | 11 | -6  | 34.98  | 2.08 |
| 1 | 11 | -6  | 50.51  | 2.86 |
| 1 | 11 | -6  | 55.47  | 3.11 |
| 1 | 11 | -6  | 41.81  | 2.55 |
| 1 | 11 | -5  | 187.36 | 5.62 |

## CIF 31

|   |     |    |        |      |
|---|-----|----|--------|------|
| 1 | 11  | -5 | 177.66 | 5.64 |
| 1 | 11  | -5 | 185.66 | 4.87 |
| 1 | 11  | -4 | 44.32  | 2.81 |
| 1 | 11  | -4 | 34.55  | 2.32 |
| 1 | 11  | -3 | 221.10 | 6.23 |
| 1 | 11  | -3 | 216.82 | 5.72 |
| 1 | 11  | -2 | 20.23  | 1.89 |
| 1 | 11  | -2 | 22.82  | 1.67 |
| 1 | 11  | -2 | 19.04  | 1.93 |
| 1 | 11  | -2 | 20.05  | 1.98 |
| 1 | 11  | -1 | 238.07 | 5.36 |
| 1 | 11  | -1 | 254.64 | 6.05 |
| 1 | 11  | -1 | 245.33 | 5.83 |
| 1 | 11  | -1 | 248.79 | 5.19 |
| 1 | 11  | 0  | 22.99  | 1.68 |
| 1 | 11  | 0  | 23.03  | 1.70 |
| 1 | 11  | 0  | 24.43  | 1.67 |
| 1 | 11  | 1  | 15.25  | 1.32 |
| 1 | 11  | 1  | 15.33  | 1.35 |
| 1 | 11  | 1  | 15.51  | 1.33 |
| 1 | 11  | 1  | 13.48  | 1.26 |
| 1 | 11  | 2  | 33.02  | 1.52 |
| 1 | 12  | -7 | 162.53 | 3.85 |
| 1 | 12  | -7 | 152.24 | 3.73 |
| 1 | 12  | -7 | 156.34 | 3.51 |
| 1 | 12  | -6 | 22.34  | 1.43 |
| 1 | 12  | -6 | 25.88  | 1.64 |
| 1 | 12  | -5 | 17.94  | 1.40 |
| 1 | 12  | -5 | 17.16  | 1.48 |
| 1 | 12  | -4 | 19.60  | 1.31 |
| 1 | 12  | -4 | 22.40  | 1.60 |
| 1 | 12  | -3 | 170.16 | 3.95 |
| 1 | 12  | -3 | 177.68 | 4.00 |
| 2 | -13 | 2  | 87.35  | 1.98 |
| 2 | -13 | 2  | 65.91  | 2.10 |
| 2 | -13 | 3  | 37.56  | 1.41 |
| 2 | -13 | 3  | 59.34  | 1.71 |
| 2 | -13 | 4  | 33.21  | 1.34 |
| 2 | -13 | 5  | 13.27  | 0.97 |
| 2 | -13 | 5  | 14.05  | 0.84 |
| 2 | -13 | 6  | 24.20  | 0.91 |



## CIF 31

|   |     |    |        |      |
|---|-----|----|--------|------|
| 2 | -13 | 6  | 21.86  | 1.14 |
| 2 | -12 | -3 | 77.33  | 2.14 |
| 2 | -12 | -2 | 0.43   | 0.55 |
| 2 | -12 | -1 | 6.97   | 0.77 |
| 2 | -12 | -1 | 6.31   | 0.99 |
| 2 | -12 | -1 | 7.73   | 0.70 |
| 2 | -12 | -1 | 6.23   | 0.83 |
| 2 | -12 | 0  | 2.06   | 0.85 |
| 2 | -12 | 0  | 2.94   | 0.78 |
| 2 | -12 | 0  | 4.18   | 0.70 |
| 2 | -12 | 1  | 204.44 | 4.75 |
| 2 | -12 | 1  | 228.35 | 4.46 |
| 2 | -12 | 2  | 4.45   | 0.88 |
| 2 | -12 | 2  | 3.24   | 0.94 |
| 2 | -12 | 2  | 3.64   | 0.92 |
| 2 | -12 | 3  | 220.02 | 4.60 |
| 2 | -12 | 3  | 218.69 | 5.10 |
| 2 | -12 | 4  | 2.00   | 0.80 |
| 2 | -12 | 4  | 1.45   | 0.92 |
| 2 | -12 | 4  | 1.19   | 0.71 |
| 2 | -12 | 5  | 545.43 | 8.70 |
| 2 | -12 | 5  | 536.12 | 8.63 |
| 2 | -12 | 5  | 548.63 | 8.44 |
| 2 | -12 | 6  | 14.98  | 1.42 |
| 2 | -12 | 6  | 15.32  | 1.35 |
| 2 | -12 | 6  | 16.04  | 1.34 |
| 2 | -12 | 7  | 46.61  | 2.17 |
| 2 | -12 | 7  | 49.89  | 2.02 |
| 2 | -12 | 8  | 21.79  | 1.32 |
| 2 | -12 | 8  | 18.12  | 1.14 |
| 2 | -12 | 9  | 8.83   | 0.79 |
| 2 | -11 | -5 | 1.33   | 0.44 |
| 2 | -11 | -4 | 31.73  | 1.36 |
| 2 | -11 | -4 | 27.98  | 1.77 |
| 2 | -11 | -3 | 6.75   | 0.81 |
| 2 | -11 | -3 | 7.61   | 1.20 |
| 2 | -11 | -3 | 7.56   | 1.06 |
| 2 | -11 | -2 | 6.19   | 0.94 |
| 2 | -11 | -2 | 6.08   | 0.81 |
| 2 | -11 | -2 | 4.84   | 1.13 |
| 2 | -11 | -2 | 6.58   | 1.10 |

## CIF 31

|   |     |    |        |      |
|---|-----|----|--------|------|
| 2 | -11 | -2 | 6.54   | 0.83 |
| 2 | -11 | -1 | 51.87  | 2.67 |
| 2 | -11 | -1 | 55.51  | 2.29 |
| 2 | -11 | 0  | 155.32 | 4.84 |
| 2 | -11 | 0  | 157.67 | 4.96 |
| 2 | -11 | 1  | 16.49  | 1.45 |
| 2 | -11 | 1  | 22.89  | 1.76 |
| 2 | -11 | 1  | 21.63  | 2.00 |
| 2 | -11 | 1  | 19.83  | 1.88 |
| 2 | -11 | 2  | 1.70   | 0.74 |
| 2 | -11 | 2  | 1.42   | 0.95 |
| 2 | -11 | 2  | 1.57   | 0.75 |
| 2 | -11 | 2  | 1.90   | 1.08 |
| 2 | -11 | 2  | 1.89   | 1.04 |
| 2 | -11 | 3  | 23.61  | 1.68 |
| 2 | -11 | 3  | 21.40  | 1.66 |
| 2 | -11 | 3  | 24.65  | 2.13 |
| 2 | -11 | 3  | 22.09  | 1.97 |
| 2 | -11 | 3  | 22.80  | 1.96 |
| 2 | -11 | 3  | 21.44  | 1.76 |
| 2 | -11 | 4  | 120.46 | 3.68 |
| 2 | -11 | 4  | 122.97 | 4.15 |
| 2 | -11 | 4  | 114.15 | 3.78 |
| 2 | -11 | 4  | 123.62 | 3.98 |
| 2 | -11 | 4  | 128.34 | 4.40 |
| 2 | -11 | 4  | 115.70 | 4.21 |
| 2 | -11 | 4  | 116.04 | 4.16 |
| 2 | -11 | 4  | 119.95 | 4.19 |
| 2 | -11 | 5  | 115.77 | 3.61 |
| 2 | -11 | 5  | 116.27 | 4.04 |
| 2 | -11 | 5  | 115.53 | 3.57 |
| 2 | -11 | 5  | 115.28 | 3.74 |
| 2 | -11 | 5  | 122.95 | 3.77 |
| 2 | -11 | 5  | 110.32 | 4.11 |
| 2 | -11 | 5  | 108.00 | 4.04 |
| 2 | -11 | 5  | 113.89 | 4.06 |
| 2 | -11 | 5  | 116.13 | 4.16 |
| 2 | -11 | 6  | 441.66 | 7.46 |
| 2 | -11 | 6  | 437.60 | 8.00 |
| 2 | -11 | 6  | 437.59 | 8.18 |
| 2 | -11 | 6  | 429.50 | 7.38 |

## CIF 31

|   |     |    |        |      |
|---|-----|----|--------|------|
| 2 | -11 | 6  | 380.17 | 7.35 |
| 2 | -11 | 6  | 472.59 | 7.51 |
| 2 | -11 | 6  | 401.58 | 7.97 |
| 2 | -11 | 6  | 424.72 | 8.04 |
| 2 | -11 | 7  | 78.66  | 2.82 |
| 2 | -11 | 7  | 80.23  | 3.15 |
| 2 | -11 | 7  | 70.61  | 3.10 |
| 2 | -11 | 7  | 75.14  | 2.78 |
| 2 | -11 | 7  | 80.30  | 2.65 |
| 2 | -11 | 7  | 78.67  | 3.22 |
| 2 | -11 | 7  | 74.03  | 3.05 |
| 2 | -11 | 8  | 15.77  | 1.32 |
| 2 | -11 | 8  | 14.58  | 1.47 |
| 2 | -11 | 8  | 15.89  | 1.31 |
| 2 | -11 | 8  | 14.64  | 1.33 |
| 2 | -11 | 8  | 11.30  | 0.92 |
| 2 | -11 | 8  | 12.41  | 1.35 |
| 2 | -11 | 8  | 15.76  | 1.47 |
| 2 | -11 | 9  | 2.21   | 0.67 |
| 2 | -11 | 9  | 2.33   | 0.80 |
| 2 | -11 | 9  | 2.12   | 0.64 |
| 2 | -11 | 9  | 2.94   | 0.68 |
| 2 | -11 | 9  | 2.93   | 0.78 |
| 2 | -11 | 9  | 2.57   | 0.77 |
| 2 | -11 | 10 | 10.99  | 0.90 |
| 2 | -11 | 10 | 11.93  | 1.10 |
| 2 | -11 | 10 | 12.04  | 1.19 |
| 2 | -11 | 10 | 10.22  | 0.90 |
| 2 | -11 | 11 | 22.96  | 1.19 |
| 2 | -11 | 11 | 21.84  | 1.21 |
| 2 | -10 | -7 | 109.91 | 2.37 |
| 2 | -10 | -7 | 78.70  | 2.21 |
| 2 | -10 | -6 | 226.84 | 4.29 |
| 2 | -10 | -5 | 165.65 | 4.08 |
| 2 | -10 | -5 | 167.15 | 4.87 |
| 2 | -10 | -4 | 0.83   | 0.79 |
| 2 | -10 | -4 | 0.09   | 0.93 |
| 2 | -10 | -4 | 0.23   | 0.59 |
| 2 | -10 | -4 | 0.39   | 0.75 |
| 2 | -10 | -3 | 52.45  | 3.03 |
| 2 | -10 | -3 | 49.95  | 2.44 |

## CIF 31

|   |     |    |        |      |
|---|-----|----|--------|------|
| 2 | -10 | -3 | 53.01  | 2.86 |
| 2 | -10 | -3 | 50.73  | 2.49 |
| 2 | -10 | -3 | 62.94  | 2.58 |
| 2 | -10 | -3 | 62.68  | 2.28 |
| 2 | -10 | -2 | 500.38 | 8.68 |
| 2 | -10 | -2 | 520.54 | 8.22 |
| 2 | -10 | -2 | 520.36 | 9.73 |
| 2 | -10 | -2 | 520.59 | 8.20 |
| 2 | -10 | -2 | 540.89 | 9.30 |
| 2 | -10 | -1 | 84.30  | 3.38 |
| 2 | -10 | -1 | 75.70  | 2.80 |
| 2 | -10 | -1 | 76.33  | 3.22 |
| 2 | -10 | -1 | 74.59  | 3.03 |
| 2 | -10 | -1 | 75.83  | 3.65 |
| 2 | -10 | -1 | 76.74  | 3.64 |
| 2 | -10 | -1 | 77.19  | 3.29 |
| 2 | -10 | 0  | 44.16  | 2.05 |
| 2 | -10 | 0  | 40.50  | 2.39 |
| 2 | -10 | 0  | 44.66  | 2.76 |
| 2 | -10 | 0  | 40.10  | 2.71 |
| 2 | -10 | 0  | 43.87  | 2.45 |
| 2 | -10 | 0  | 41.75  | 2.75 |
| 2 | -10 | 0  | 44.44  | 2.52 |
| 2 | -10 | 1  | 23.62  | 1.87 |
| 2 | -10 | 1  | 22.33  | 1.85 |
| 2 | -10 | 1  | 23.65  | 2.11 |
| 2 | -10 | 1  | 25.90  | 2.22 |
| 2 | -10 | 1  | 21.95  | 2.10 |
| 2 | -10 | 1  | 21.00  | 1.83 |
| 2 | -10 | 1  | 20.65  | 1.71 |
| 2 | -10 | 1  | 21.24  | 2.03 |
| 2 | -10 | 2  | 19.59  | 1.76 |
| 2 | -10 | 2  | 18.27  | 1.74 |
| 2 | -10 | 2  | 19.02  | 1.90 |
| 2 | -10 | 2  | 17.58  | 1.88 |
| 2 | -10 | 2  | 22.38  | 2.11 |
| 2 | -10 | 2  | 21.59  | 2.08 |
| 2 | -10 | 2  | 17.98  | 1.52 |
| 2 | -10 | 2  | 20.77  | 1.81 |
| 2 | -10 | 2  | 22.74  | 2.10 |
| 2 | -10 | 2  | 19.00  | 1.77 |

## CIF 31

|   |     |   |        |      |
|---|-----|---|--------|------|
| 2 | -10 | 3 | 144.43 | 4.47 |
| 2 | -10 | 3 | 155.04 | 4.95 |
| 2 | -10 | 3 | 147.79 | 4.46 |
| 2 | -10 | 3 | 146.34 | 4.60 |
| 2 | -10 | 3 | 154.57 | 5.38 |
| 2 | -10 | 3 | 136.34 | 4.91 |
| 2 | -10 | 3 | 145.87 | 5.03 |
| 2 | -10 | 3 | 152.46 | 4.96 |
| 2 | -10 | 3 | 146.92 | 4.86 |
| 2 | -10 | 4 | 97.84  | 3.64 |
| 2 | -10 | 4 | 86.76  | 3.80 |
| 2 | -10 | 4 | 82.56  | 3.71 |
| 2 | -10 | 4 | 91.17  | 3.52 |
| 2 | -10 | 4 | 96.38  | 3.72 |
| 2 | -10 | 4 | 85.62  | 3.90 |
| 2 | -10 | 4 | 75.91  | 3.61 |
| 2 | -10 | 4 | 86.64  | 3.43 |
| 2 | -10 | 4 | 93.83  | 3.96 |
| 2 | -10 | 4 | 87.11  | 3.81 |
| 2 | -10 | 5 | 29.56  | 2.06 |
| 2 | -10 | 5 | 27.29  | 2.17 |
| 2 | -10 | 5 | 27.42  | 2.02 |
| 2 | -10 | 5 | 22.40  | 1.70 |
| 2 | -10 | 5 | 23.49  | 1.95 |
| 2 | -10 | 5 | 23.73  | 2.15 |
| 2 | -10 | 5 | 23.60  | 1.89 |
| 2 | -10 | 5 | 25.81  | 2.20 |
| 2 | -10 | 5 | 23.22  | 2.11 |
| 2 | -10 | 5 | 27.23  | 2.16 |
| 2 | -10 | 5 | 25.08  | 2.16 |
| 2 | -10 | 6 | 6.53   | 1.36 |
| 2 | -10 | 6 | 6.49   | 1.18 |
| 2 | -10 | 6 | 6.32   | 1.06 |
| 2 | -10 | 6 | 5.87   | 1.18 |
| 2 | -10 | 6 | 7.20   | 1.17 |
| 2 | -10 | 6 | 5.20   | 1.25 |
| 2 | -10 | 6 | 6.01   | 1.23 |
| 2 | -10 | 6 | 5.74   | 1.32 |
| 2 | -10 | 6 | 8.89   | 1.94 |
| 2 | -10 | 6 | 6.16   | 1.25 |
| 2 | -10 | 7 | 218.26 | 5.85 |

## CIF 31

|   |     |    |        |       |
|---|-----|----|--------|-------|
| 2 | -10 | 7  | 199.92 | 5.33  |
| 2 | -10 | 7  | 202.93 | 5.04  |
| 2 | -10 | 7  | 200.29 | 5.48  |
| 2 | -10 | 7  | 196.93 | 5.03  |
| 2 | -10 | 7  | 189.05 | 4.62  |
| 2 | -10 | 7  | 212.35 | 5.88  |
| 2 | -10 | 7  | 215.49 | 5.69  |
| 2 | -10 | 7  | 211.01 | 5.88  |
| 2 | -10 | 8  | 708.27 | 11.15 |
| 2 | -10 | 8  | 655.50 | 10.43 |
| 2 | -10 | 8  | 647.02 | 10.67 |
| 2 | -10 | 8  | 695.63 | 9.06  |
| 2 | -10 | 8  | 699.70 | 11.25 |
| 2 | -10 | 8  | 672.49 | 10.78 |
| 2 | -10 | 8  | 731.00 | 11.63 |
| 2 | -10 | 8  | 668.75 | 11.17 |
| 2 | -10 | 9  | 12.30  | 1.49  |
| 2 | -10 | 9  | 11.90  | 1.35  |
| 2 | -10 | 9  | 11.46  | 1.36  |
| 2 | -10 | 9  | 11.36  | 1.56  |
| 2 | -10 | 9  | 11.15  | 1.38  |
| 2 | -10 | 9  | 11.38  | 1.39  |
| 2 | -10 | 9  | 13.42  | 1.81  |
| 2 | -10 | 10 | 125.02 | 3.81  |
| 2 | -10 | 10 | 115.38 | 3.53  |
| 2 | -10 | 10 | 111.80 | 3.56  |
| 2 | -10 | 10 | 129.42 | 3.96  |
| 2 | -10 | 10 | 119.28 | 3.71  |
| 2 | -10 | 10 | 120.78 | 3.55  |
| 2 | -10 | 11 | 1.27   | 0.79  |
| 2 | -10 | 11 | 0.48   | 0.72  |
| 2 | -10 | 11 | 1.14   | 0.63  |
| 2 | -10 | 11 | 0.35   | 0.57  |
| 2 | -10 | 11 | 0.66   | 0.70  |
| 2 | -10 | 11 | 0.29   | 0.51  |
| 2 | -10 | 12 | 0.85   | 0.53  |
| 2 | -10 | 12 | 0.86   | 0.54  |
| 2 | -10 | 12 | 0.16   | 0.51  |
| 2 | -9  | -8 | 18.55  | 1.35  |
| 2 | -9  | -8 | 18.52  | 1.23  |
| 2 | -9  | -8 | 16.42  | 1.21  |

## CIF 31

|   |    |    |        |      |
|---|----|----|--------|------|
| 2 | -9 | -7 | 87.95  | 2.30 |
| 2 | -9 | -6 | 5.66   | 1.08 |
| 2 | -9 | -6 | 5.01   | 0.78 |
| 2 | -9 | -6 | 3.75   | 1.20 |
| 2 | -9 | -5 | 62.40  | 2.83 |
| 2 | -9 | -5 | 52.65  | 3.19 |
| 2 | -9 | -5 | 51.97  | 2.62 |
| 2 | -9 | -5 | 57.54  | 3.06 |
| 2 | -9 | -5 | 52.33  | 2.67 |
| 2 | -9 | -5 | 58.18  | 2.86 |
| 2 | -9 | -4 | 176.42 | 5.07 |
| 2 | -9 | -4 | 183.55 | 4.48 |
| 2 | -9 | -4 | 194.32 | 6.08 |
| 2 | -9 | -4 | 171.06 | 5.52 |
| 2 | -9 | -4 | 176.76 | 5.16 |
| 2 | -9 | -4 | 195.63 | 5.40 |
| 2 | -9 | -4 | 185.67 | 5.18 |
| 2 | -9 | -3 | 118.99 | 4.23 |
| 2 | -9 | -3 | 118.69 | 4.60 |
| 2 | -9 | -3 | 121.20 | 4.20 |
| 2 | -9 | -3 | 117.97 | 3.56 |
| 2 | -9 | -2 | 2.33   | 1.00 |
| 2 | -9 | -2 | 2.21   | 0.88 |
| 2 | -9 | -2 | 2.41   | 0.85 |
| 2 | -9 | -2 | 3.10   | 1.21 |
| 2 | -9 | -2 | 3.68   | 1.19 |
| 2 | -9 | -2 | 1.88   | 0.95 |
| 2 | -9 | -1 | 22.28  | 1.92 |
| 2 | -9 | -1 | 26.08  | 2.12 |
| 2 | -9 | -1 | 21.60  | 2.13 |
| 2 | -9 | -1 | 20.43  | 2.03 |
| 2 | -9 | -1 | 26.09  | 2.02 |
| 2 | -9 | -1 | 25.99  | 1.89 |
| 2 | -9 | -1 | 25.59  | 2.03 |
| 2 | -9 | 0  | 338.72 | 7.04 |
| 2 | -9 | 0  | 323.23 | 6.45 |
| 2 | -9 | 0  | 295.71 | 6.83 |
| 2 | -9 | 0  | 309.12 | 7.58 |
| 2 | -9 | 0  | 318.18 | 7.50 |
| 2 | -9 | 0  | 332.99 | 7.73 |
| 2 | -9 | 0  | 317.07 | 6.78 |

## CIF 31

|   |    |   |        |       |
|---|----|---|--------|-------|
| 2 | -9 | 0 | 312.27 | 7.41  |
| 2 | -9 | 0 | 332.96 | 6.88  |
| 2 | -9 | 0 | 330.12 | 6.76  |
| 2 | -9 | 1 | 13.47  | 1.54  |
| 2 | -9 | 1 | 11.80  | 1.53  |
| 2 | -9 | 1 | 11.50  | 1.31  |
| 2 | -9 | 1 | 12.66  | 1.30  |
| 2 | -9 | 1 | 10.56  | 1.43  |
| 2 | -9 | 1 | 10.73  | 1.56  |
| 2 | -9 | 1 | 10.14  | 1.59  |
| 2 | -9 | 1 | 10.51  | 1.61  |
| 2 | -9 | 1 | 10.98  | 1.32  |
| 2 | -9 | 1 | 10.81  | 1.56  |
| 2 | -9 | 1 | 10.25  | 1.43  |
| 2 | -9 | 1 | 9.56   | 1.30  |
| 2 | -9 | 2 | 681.01 | 10.69 |
| 2 | -9 | 2 | 658.35 | 11.01 |
| 2 | -9 | 2 | 653.76 | 9.91  |
| 2 | -9 | 2 | 614.69 | 10.72 |
| 2 | -9 | 2 | 664.32 | 10.52 |
| 2 | -9 | 2 | 656.87 | 9.88  |
| 2 | -9 | 2 | 604.89 | 10.47 |
| 2 | -9 | 2 | 672.23 | 11.78 |
| 2 | -9 | 2 | 612.85 | 10.93 |
| 2 | -9 | 2 | 625.12 | 11.07 |
| 2 | -9 | 2 | 639.52 | 9.79  |
| 2 | -9 | 2 | 640.45 | 11.04 |
| 2 | -9 | 2 | 660.33 | 10.46 |
| 2 | -9 | 2 | 686.77 | 11.03 |
| 2 | -9 | 3 | 2.51   | 1.00  |
| 2 | -9 | 3 | 3.02   | 1.15  |
| 2 | -9 | 3 | 4.10   | 1.28  |
| 2 | -9 | 3 | 4.71   | 1.13  |
| 2 | -9 | 3 | 4.23   | 1.06  |
| 2 | -9 | 3 | 3.52   | 0.91  |
| 2 | -9 | 3 | 1.76   | 0.87  |
| 2 | -9 | 3 | 1.67   | 0.76  |
| 2 | -9 | 3 | 4.60   | 1.24  |
| 2 | -9 | 3 | 4.36   | 1.22  |
| 2 | -9 | 3 | 4.10   | 1.19  |
| 2 | -9 | 3 | 2.97   | 0.79  |



## CIF 31

|   |    |   |         |       |
|---|----|---|---------|-------|
| 2 | -9 | 4 | 1145.82 | 15.66 |
| 2 | -9 | 4 | 1075.45 | 15.03 |
| 2 | -9 | 4 | 1096.98 | 14.67 |
| 2 | -9 | 4 | 1123.63 | 14.23 |
| 2 | -9 | 4 | 1084.77 | 14.92 |
| 2 | -9 | 4 | 904.19  | 13.48 |
| 2 | -9 | 4 | 987.85  | 15.07 |
| 2 | -9 | 4 | 1134.38 | 15.33 |
| 2 | -9 | 4 | 1125.31 | 14.50 |
| 2 | -9 | 4 | 956.01  | 14.78 |
| 2 | -9 | 5 | 52.76   | 3.06  |
| 2 | -9 | 5 | 48.84   | 2.84  |
| 2 | -9 | 5 | 47.29   | 2.65  |
| 2 | -9 | 5 | 40.15   | 2.61  |
| 2 | -9 | 5 | 47.13   | 2.97  |
| 2 | -9 | 5 | 49.50   | 2.91  |
| 2 | -9 | 5 | 45.91   | 2.82  |
| 2 | -9 | 5 | 43.65   | 2.46  |
| 2 | -9 | 6 | 541.32  | 9.26  |
| 2 | -9 | 6 | 523.90  | 9.82  |
| 2 | -9 | 6 | 561.83  | 10.64 |
| 2 | -9 | 6 | 561.92  | 10.23 |
| 2 | -9 | 6 | 564.58  | 9.11  |
| 2 | -9 | 6 | 522.60  | 9.82  |
| 2 | -9 | 7 | 108.85  | 4.34  |
| 2 | -9 | 7 | 107.09  | 4.41  |
| 2 | -9 | 7 | 109.76  | 4.35  |
| 2 | -9 | 7 | 119.30  | 3.64  |
| 2 | -9 | 7 | 113.80  | 4.44  |
| 2 | -9 | 7 | 104.92  | 4.15  |
| 2 | -9 | 7 | 108.59  | 4.24  |
| 2 | -9 | 7 | 102.73  | 4.11  |
| 2 | -9 | 7 | 106.39  | 6.18  |
| 2 | -9 | 8 | 88.37   | 4.28  |
| 2 | -9 | 8 | 90.55   | 3.89  |
| 2 | -9 | 8 | 106.17  | 4.20  |
| 2 | -9 | 8 | 76.40   | 2.67  |
| 2 | -9 | 8 | 88.95   | 3.75  |
| 2 | -9 | 8 | 105.51  | 4.18  |
| 2 | -9 | 8 | 101.87  | 4.03  |
| 2 | -9 | 8 | 99.42   | 3.92  |

## CIF 31

|   |    |     |        |      |
|---|----|-----|--------|------|
| 2 | -9 | 8   | 85.99  | 5.39 |
| 2 | -9 | 8   | 89.25  | 3.88 |
| 2 | -9 | 9   | 6.45   | 2.68 |
| 2 | -9 | 9   | 7.33   | 2.51 |
| 2 | -9 | 9   | 8.67   | 1.40 |
| 2 | -9 | 9   | 7.13   | 1.44 |
| 2 | -9 | 9   | 8.92   | 1.54 |
| 2 | -9 | 9   | 8.43   | 1.43 |
| 2 | -9 | 9   | 8.68   | 1.41 |
| 2 | -9 | 9   | 10.10  | 3.51 |
| 2 | -9 | 9   | 7.89   | 1.28 |
| 2 | -9 | 10  | 130.55 | 5.02 |
| 2 | -9 | 10  | 148.30 | 4.65 |
| 2 | -9 | 10  | 167.17 | 4.90 |
| 2 | -9 | 10  | 149.96 | 4.55 |
| 2 | -9 | 10  | 152.48 | 4.48 |
| 2 | -9 | 10  | 184.40 | 6.03 |
| 2 | -9 | 10  | 131.67 | 4.99 |
| 2 | -9 | 11  | 295.24 | 6.30 |
| 2 | -9 | 11  | 291.92 | 6.17 |
| 2 | -9 | 11  | 301.62 | 6.18 |
| 2 | -9 | 11  | 286.72 | 5.97 |
| 2 | -9 | 11  | 291.78 | 5.83 |
| 2 | -9 | 12  | 52.02  | 2.18 |
| 2 | -9 | 12  | 47.86  | 2.18 |
| 2 | -9 | 12  | 50.90  | 2.19 |
| 2 | -9 | 12  | 44.62  | 1.85 |
| 2 | -9 | 13  | 94.87  | 2.40 |
| 2 | -9 | 13  | 92.25  | 2.34 |
| 2 | -8 | -10 | 16.70  | 0.91 |
| 2 | -8 | -10 | 17.22  | 1.16 |
| 2 | -8 | -10 | 14.55  | 0.93 |
| 2 | -8 | -10 | 14.64  | 0.77 |
| 2 | -8 | -9  | 126.56 | 3.16 |
| 2 | -8 | -9  | 123.11 | 2.89 |
| 2 | -8 | -8  | 69.18  | 2.70 |
| 2 | -8 | -8  | 64.53  | 2.39 |
| 2 | -8 | -8  | 66.22  | 2.52 |
| 2 | -8 | -7  | 242.74 | 5.63 |
| 2 | -8 | -7  | 253.13 | 5.21 |
| 2 | -8 | -7  | 254.86 | 5.67 |

## CIF 31

|   |    |    |        |       |
|---|----|----|--------|-------|
| 2 | -8 | -6 | 175.04 | 4.32  |
| 2 | -8 | -6 | 175.04 | 5.80  |
| 2 | -8 | -6 | 149.27 | 4.84  |
| 2 | -8 | -6 | 132.46 | 4.85  |
| 2 | -8 | -6 | 151.24 | 4.88  |
| 2 | -8 | -6 | 171.50 | 4.91  |
| 2 | -8 | -6 | 184.99 | 5.04  |
| 2 | -8 | -5 | 7.57   | 1.10  |
| 2 | -8 | -5 | 8.76   | 1.39  |
| 2 | -8 | -5 | 10.14  | 1.60  |
| 2 | -8 | -5 | 8.96   | 1.40  |
| 2 | -8 | -5 | 7.00   | 1.27  |
| 2 | -8 | -5 | 7.88   | 1.39  |
| 2 | -8 | -4 | 60.39  | 2.44  |
| 2 | -8 | -4 | 77.41  | 3.87  |
| 2 | -8 | -4 | 64.71  | 3.23  |
| 2 | -8 | -4 | 59.80  | 3.12  |
| 2 | -8 | -4 | 58.50  | 3.33  |
| 2 | -8 | -4 | 68.94  | 3.17  |
| 2 | -8 | -4 | 72.80  | 3.31  |
| 2 | -8 | -3 | 1.09   | 0.72  |
| 2 | -8 | -3 | 3.74   | 1.22  |
| 2 | -8 | -3 | 1.51   | 0.93  |
| 2 | -8 | -3 | 2.06   | 1.14  |
| 2 | -8 | -2 | 141.46 | 4.58  |
| 2 | -8 | -2 | 155.77 | 4.73  |
| 2 | -8 | -2 | 157.01 | 5.02  |
| 2 | -8 | -2 | 162.40 | 5.21  |
| 2 | -8 | -2 | 156.81 | 4.65  |
| 2 | -8 | -2 | 137.06 | 4.39  |
| 2 | -8 | -2 | 158.59 | 4.35  |
| 2 | -8 | -1 | 889.56 | 12.47 |
| 2 | -8 | -1 | 845.95 | 11.78 |
| 2 | -8 | -1 | 996.10 | 13.20 |
| 2 | -8 | -1 | 895.79 | 13.01 |
| 2 | -8 | -1 | 847.87 | 12.91 |
| 2 | -8 | -1 | 750.69 | 12.60 |
| 2 | -8 | -1 | 890.03 | 12.30 |
| 2 | -8 | -1 | 852.43 | 13.04 |
| 2 | -8 | -1 | 875.36 | 12.38 |
| 2 | -8 | -1 | 827.56 | 11.77 |

## CIF 31

|   |    |    |         |       |
|---|----|----|---------|-------|
| 2 | -8 | -1 | 842.10  | 11.38 |
| 2 | -8 | 0  | 1767.84 | 20.30 |
| 2 | -8 | 0  | 1942.75 | 21.13 |
| 2 | -8 | 0  | 1797.39 | 19.64 |
| 2 | -8 | 0  | 1780.72 | 19.49 |
| 2 | -8 | 0  | 1987.49 | 21.14 |
| 2 | -8 | 0  | 1698.57 | 18.98 |
| 2 | -8 | 0  | 1840.91 | 21.43 |
| 2 | -8 | 0  | 1732.55 | 20.97 |
| 2 | -8 | 0  | 1729.55 | 20.97 |
| 2 | -8 | 0  | 1867.68 | 20.07 |
| 2 | -8 | 0  | 1638.77 | 20.68 |
| 2 | -8 | 0  | 1646.63 | 19.75 |
| 2 | -8 | 0  | 1701.67 | 19.80 |
| 2 | -8 | 0  | 1784.85 | 19.83 |
| 2 | -8 | 1  | 201.75  | 5.17  |
| 2 | -8 | 1  | 218.01  | 5.48  |
| 2 | -8 | 1  | 200.34  | 4.87  |
| 2 | -8 | 1  | 195.23  | 5.05  |
| 2 | -8 | 1  | 194.72  | 4.77  |
| 2 | -8 | 1  | 217.38  | 5.40  |
| 2 | -8 | 1  | 209.58  | 4.83  |
| 2 | -8 | 1  | 193.10  | 5.60  |
| 2 | -8 | 1  | 228.90  | 5.81  |
| 2 | -8 | 1  | 178.02  | 4.54  |
| 2 | -8 | 1  | 209.61  | 5.53  |
| 2 | -8 | 1  | 205.04  | 5.02  |
| 2 | -8 | 1  | 196.18  | 4.97  |
| 2 | -8 | 1  | 187.79  | 5.00  |
| 2 | -8 | 2  | 875.28  | 12.59 |
| 2 | -8 | 2  | 855.87  | 12.48 |
| 2 | -8 | 2  | 858.74  | 12.11 |
| 2 | -8 | 2  | 857.39  | 11.69 |
| 2 | -8 | 2  | 895.29  | 12.65 |
| 2 | -8 | 2  | 894.23  | 11.91 |
| 2 | -8 | 2  | 898.34  | 13.32 |
| 2 | -8 | 2  | 853.37  | 12.77 |
| 2 | -8 | 2  | 868.02  | 11.40 |
| 2 | -8 | 2  | 921.42  | 12.92 |
| 2 | -8 | 3  | 8.05    | 1.47  |
| 2 | -8 | 3  | 5.17    | 1.21  |

## CIF 31

|   |    |   |        |       |
|---|----|---|--------|-------|
| 2 | -8 | 3 | 6.79   | 1.17  |
| 2 | -8 | 3 | 4.20   | 1.07  |
| 2 | -8 | 3 | 6.90   | 1.35  |
| 2 | -8 | 3 | 6.93   | 0.90  |
| 2 | -8 | 3 | 8.50   | 1.32  |
| 2 | -8 | 3 | 10.59  | 1.30  |
| 2 | -8 | 3 | 4.34   | 3.06  |
| 2 | -8 | 4 | 808.33 | 12.58 |
| 2 | -8 | 4 | 790.69 | 11.95 |
| 2 | -8 | 4 | 814.50 | 12.73 |
| 2 | -8 | 4 | 783.22 | 11.86 |
| 2 | -8 | 5 | 212.09 | 5.96  |
| 2 | -8 | 5 | 180.45 | 5.32  |
| 2 | -8 | 5 | 203.19 | 5.87  |
| 2 | -8 | 5 | 189.24 | 5.50  |
| 2 | -8 | 5 | 195.71 | 5.51  |
| 2 | -8 | 5 | 197.71 | 5.46  |
| 2 | -8 | 5 | 217.81 | 5.12  |
| 2 | -8 | 5 | 184.55 | 6.40  |
| 2 | -8 | 6 | 872.08 | 13.09 |
| 2 | -8 | 6 | 856.33 | 13.19 |
| 2 | -8 | 6 | 834.04 | 12.81 |
| 2 | -8 | 6 | 804.15 | 12.41 |
| 2 | -8 | 6 | 783.00 | 11.14 |
| 2 | -8 | 6 | 778.00 | 13.92 |
| 2 | -8 | 7 | 20.32  | 2.11  |
| 2 | -8 | 7 | 23.01  | 2.04  |
| 2 | -8 | 7 | 16.34  | 1.80  |
| 2 | -8 | 7 | 24.54  | 1.65  |
| 2 | -8 | 7 | 15.31  | 1.72  |
| 2 | -8 | 7 | 17.69  | 3.48  |
| 2 | -8 | 8 | 564.64 | 10.48 |
| 2 | -8 | 8 | 603.33 | 9.98  |
| 2 | -8 | 8 | 516.72 | 9.68  |
| 2 | -8 | 8 | 539.00 | 9.98  |
| 2 | -8 | 8 | 551.79 | 10.03 |
| 2 | -8 | 8 | 470.28 | 11.36 |
| 2 | -8 | 9 | 34.86  | 2.41  |
| 2 | -8 | 9 | 40.19  | 3.07  |
| 2 | -8 | 9 | 35.32  | 2.52  |
| 2 | -8 | 9 | 26.29  | 2.23  |

## CIF 31

|   |    |     |        |      |
|---|----|-----|--------|------|
| 2 | -8 | 9   | 27.83  | 2.20 |
| 2 | -8 | 9   | 24.44  | 4.45 |
| 2 | -8 | 10  | 330.97 | 8.01 |
| 2 | -8 | 10  | 346.12 | 7.88 |
| 2 | -8 | 10  | 332.23 | 7.42 |
| 2 | -8 | 10  | 350.16 | 7.39 |
| 2 | -8 | 10  | 323.93 | 7.03 |
| 2 | -8 | 11  | 109.96 | 4.77 |
| 2 | -8 | 11  | 126.36 | 4.20 |
| 2 | -8 | 11  | 137.40 | 4.22 |
| 2 | -8 | 11  | 112.90 | 4.90 |
| 2 | -8 | 11  | 133.05 | 5.31 |
| 2 | -8 | 12  | 0.58   | 1.94 |
| 2 | -8 | 12  | 2.13   | 0.74 |
| 2 | -8 | 12  | 1.25   | 0.74 |
| 2 | -8 | 13  | 7.51   | 0.96 |
| 2 | -8 | 13  | 8.03   | 0.98 |
| 2 | -8 | 13  | 6.99   | 0.75 |
| 2 | -7 | -11 | 82.72  | 1.87 |
| 2 | -7 | -11 | 80.77  | 2.58 |
| 2 | -7 | -10 | 514.63 | 8.62 |
| 2 | -7 | -10 | 539.32 | 7.37 |
| 2 | -7 | -10 | 532.51 | 7.38 |
| 2 | -7 | -9  | 107.14 | 3.21 |
| 2 | -7 | -9  | 112.78 | 3.51 |
| 2 | -7 | -8  | 212.79 | 5.24 |
| 2 | -7 | -8  | 205.43 | 5.03 |
| 2 | -7 | -8  | 187.85 | 5.11 |
| 2 | -7 | -8  | 189.09 | 4.88 |
| 2 | -7 | -7  | 161.42 | 4.43 |
| 2 | -7 | -7  | 142.87 | 5.44 |
| 2 | -7 | -7  | 134.87 | 4.76 |
| 2 | -7 | -7  | 145.91 | 4.53 |
| 2 | -7 | -7  | 155.98 | 4.84 |
| 2 | -7 | -7  | 155.87 | 4.60 |
| 2 | -7 | -6  | 90.99  | 3.30 |
| 2 | -7 | -6  | 80.09  | 4.04 |
| 2 | -7 | -6  | 77.59  | 3.58 |
| 2 | -7 | -6  | 69.10  | 3.64 |
| 2 | -7 | -6  | 74.01  | 3.54 |
| 2 | -7 | -6  | 82.81  | 3.40 |

## CIF 31

|   |    |    |        |      |
|---|----|----|--------|------|
| 2 | -7 | -6 | 72.53  | 3.30 |
| 2 | -7 | -6 | 89.37  | 3.50 |
| 2 | -7 | -5 | 28.41  | 1.87 |
| 2 | -7 | -5 | 30.37  | 2.54 |
| 2 | -7 | -5 | 30.12  | 2.29 |
| 2 | -7 | -5 | 32.13  | 2.45 |
| 2 | -7 | -5 | 28.77  | 2.22 |
| 2 | -7 | -5 | 30.08  | 2.13 |
| 2 | -7 | -5 | 31.05  | 2.24 |
| 2 | -7 | -5 | 33.73  | 2.24 |
| 2 | -7 | -4 | 293.90 | 5.69 |
| 2 | -7 | -4 | 279.38 | 6.72 |
| 2 | -7 | -4 | 301.69 | 7.20 |
| 2 | -7 | -4 | 292.54 | 6.82 |
| 2 | -7 | -4 | 314.68 | 6.58 |
| 2 | -7 | -4 | 280.90 | 6.47 |
| 2 | -7 | -4 | 303.94 | 6.53 |
| 2 | -7 | -3 | 5.92   | 0.87 |
| 2 | -7 | -3 | 6.04   | 1.11 |
| 2 | -7 | -3 | 7.25   | 0.99 |
| 2 | -7 | -3 | 5.96   | 0.97 |
| 2 | -7 | -3 | 7.37   | 1.30 |
| 2 | -7 | -3 | 4.55   | 1.19 |
| 2 | -7 | -3 | 8.61   | 1.04 |
| 2 | -7 | -2 | 15.89  | 1.51 |
| 2 | -7 | -2 | 14.91  | 1.36 |
| 2 | -7 | -2 | 15.10  | 1.48 |
| 2 | -7 | -2 | 15.01  | 1.25 |
| 2 | -7 | -2 | 20.11  | 1.61 |
| 2 | -7 | -2 | 16.46  | 1.61 |
| 2 | -7 | -2 | 17.71  | 1.70 |
| 2 | -7 | -2 | 14.66  | 1.39 |
| 2 | -7 | -2 | 15.52  | 1.33 |
| 2 | -7 | -1 | 552.97 | 8.78 |
| 2 | -7 | -1 | 531.07 | 8.78 |
| 2 | -7 | -1 | 513.73 | 8.18 |
| 2 | -7 | -1 | 528.01 | 8.19 |
| 2 | -7 | -1 | 581.02 | 9.09 |
| 2 | -7 | -1 | 534.12 | 8.04 |
| 2 | -7 | -1 | 554.03 | 9.13 |
| 2 | -7 | -1 | 511.78 | 8.88 |

## CIF 31

|   |    |    |         |       |
|---|----|----|---------|-------|
| 2 | -7 | -1 | 562.83  | 9.31  |
| 2 | -7 | -1 | 560.69  | 8.51  |
| 2 | -7 | -1 | 539.86  | 9.04  |
| 2 | -7 | -1 | 536.60  | 8.56  |
| 2 | -7 | -1 | 515.76  | 8.16  |
| 2 | -7 | -1 | 523.45  | 7.91  |
| 2 | -7 | 0  | 986.70  | 12.42 |
| 2 | -7 | 0  | 1000.58 | 12.46 |
| 2 | -7 | 0  | 1006.92 | 12.85 |
| 2 | -7 | 0  | 888.09  | 12.31 |
| 2 | -7 | 0  | 997.23  | 12.44 |
| 2 | -7 | 0  | 992.13  | 12.90 |
| 2 | -7 | 0  | 992.61  | 12.69 |
| 2 | -7 | 0  | 1012.16 | 12.39 |
| 2 | -7 | 0  | 1046.56 | 13.21 |
| 2 | -7 | 0  | 925.60  | 11.98 |
| 2 | -7 | 0  | 1009.36 | 13.46 |
| 2 | -7 | 0  | 1026.42 | 13.33 |
| 2 | -7 | 0  | 1000.53 | 12.27 |
| 2 | -7 | 0  | 927.29  | 12.89 |
| 2 | -7 | 0  | 1103.10 | 12.86 |
| 2 | -7 | 1  | 644.12  | 9.52  |
| 2 | -7 | 1  | 600.39  | 9.00  |
| 2 | -7 | 1  | 620.47  | 9.45  |
| 2 | -7 | 1  | 652.59  | 9.43  |
| 2 | -7 | 1  | 635.73  | 9.04  |
| 2 | -7 | 1  | 641.58  | 9.59  |
| 2 | -7 | 1  | 629.19  | 9.04  |
| 2 | -7 | 1  | 644.77  | 10.11 |
| 2 | -7 | 1  | 608.26  | 9.62  |
| 2 | -7 | 1  | 639.87  | 8.73  |
| 2 | -7 | 1  | 617.69  | 9.54  |
| 2 | -7 | 1  | 617.79  | 8.92  |
| 2 | -7 | 2  | 303.15  | 6.41  |
| 2 | -7 | 2  | 320.72  | 6.28  |
| 2 | -7 | 2  | 314.93  | 6.15  |
| 2 | -7 | 2  | 302.40  | 6.22  |
| 2 | -7 | 2  | 327.80  | 6.83  |
| 2 | -7 | 2  | 313.38  | 6.35  |
| 2 | -7 | 2  | 300.23  | 5.31  |
| 2 | -7 | 2  | 303.73  | 6.19  |



## CIF 31

|   |    |    |         |       |
|---|----|----|---------|-------|
| 2 | -7 | 2  | 290.96  | 5.53  |
| 2 | -7 | 2  | 334.70  | 6.62  |
| 2 | -7 | 3  | 65.58   | 2.96  |
| 2 | -7 | 3  | 61.04   | 2.68  |
| 2 | -7 | 3  | 67.40   | 2.88  |
| 2 | -7 | 3  | 60.11   | 2.78  |
| 2 | -7 | 3  | 64.80   | 2.82  |
| 2 | -7 | 3  | 66.60   | 2.19  |
| 2 | -7 | 3  | 62.11   | 2.71  |
| 2 | -7 | 3  | 67.88   | 2.89  |
| 2 | -7 | 4  | 425.26  | 8.25  |
| 2 | -7 | 4  | 468.39  | 8.24  |
| 2 | -7 | 4  | 441.24  | 8.38  |
| 2 | -7 | 4  | 466.47  | 8.12  |
| 2 | -7 | 4  | 450.81  | 7.97  |
| 2 | -7 | 4  | 484.03  | 8.43  |
| 2 | -7 | 4  | 426.96  | 7.28  |
| 2 | -7 | 5  | 815.43  | 12.13 |
| 2 | -7 | 5  | 789.71  | 11.77 |
| 2 | -7 | 5  | 771.65  | 11.48 |
| 2 | -7 | 5  | 787.67  | 10.69 |
| 2 | -7 | 6  | 76.06   | 3.51  |
| 2 | -7 | 6  | 90.13   | 3.18  |
| 2 | -7 | 6  | 92.64   | 3.67  |
| 2 | -7 | 6  | 84.22   | 3.45  |
| 2 | -7 | 6  | 89.40   | 3.50  |
| 2 | -7 | 6  | 81.23   | 2.83  |
| 2 | -7 | 6  | 98.71   | 4.00  |
| 2 | -7 | 7  | 2843.45 | 28.62 |
| 2 | -7 | 7  | 2893.98 | 29.95 |
| 2 | -7 | 7  | 2916.90 | 30.01 |
| 2 | -7 | 7  | 2954.80 | 31.31 |
| 2 | -7 | 8  | 103.52  | 4.08  |
| 2 | -7 | 8  | 108.00  | 3.70  |
| 2 | -7 | 8  | 96.57   | 3.72  |
| 2 | -7 | 8  | 112.36  | 4.27  |
| 2 | -7 | 9  | 716.65  | 11.66 |
| 2 | -7 | 9  | 721.17  | 10.69 |
| 2 | -7 | 9  | 715.27  | 11.98 |
| 2 | -7 | 9  | 728.82  | 10.97 |
| 2 | -7 | 10 | 16.36   | 1.59  |

## CIF 31

|   |    |     |        |       |
|---|----|-----|--------|-------|
| 2 | -7 | 10  | 22.98  | 2.38  |
| 2 | -7 | 10  | 18.75  | 1.97  |
| 2 | -7 | 10  | 15.45  | 1.80  |
| 2 | -7 | 10  | 16.53  | 1.82  |
| 2 | -7 | 10  | 15.90  | 2.95  |
| 2 | -7 | 11  | 688.48 | 12.13 |
| 2 | -7 | 11  | 739.85 | 12.17 |
| 2 | -7 | 11  | 698.47 | 11.23 |
| 2 | -7 | 11  | 724.38 | 11.21 |
| 2 | -7 | 11  | 656.97 | 12.26 |
| 2 | -7 | 12  | 7.68   | 1.15  |
| 2 | -7 | 12  | 7.78   | 1.22  |
| 2 | -7 | 12  | 8.17   | 1.71  |
| 2 | -7 | 13  | 17.13  | 1.27  |
| 2 | -6 | -12 | 5.51   | 0.84  |
| 2 | -6 | -12 | 4.04   | 0.63  |
| 2 | -6 | -11 | 121.76 | 2.94  |
| 2 | -6 | -11 | 96.78  | 3.60  |
| 2 | -6 | -11 | 102.89 | 3.32  |
| 2 | -6 | -11 | 132.09 | 3.41  |
| 2 | -6 | -10 | 232.51 | 5.00  |
| 2 | -6 | -10 | 225.57 | 5.64  |
| 2 | -6 | -10 | 238.03 | 5.20  |
| 2 | -6 | -10 | 239.49 | 5.46  |
| 2 | -6 | -9  | 16.54  | 1.60  |
| 2 | -6 | -9  | 16.09  | 1.58  |
| 2 | -6 | -9  | 14.03  | 1.60  |
| 2 | -6 | -9  | 14.20  | 1.40  |
| 2 | -6 | -8  | 763.36 | 11.40 |
| 2 | -6 | -8  | 746.19 | 11.15 |
| 2 | -6 | -8  | 743.19 | 11.01 |
| 2 | -6 | -8  | 734.37 | 11.69 |
| 2 | -6 | -8  | 738.71 | 11.11 |
| 2 | -6 | -7  | 61.16  | 2.87  |
| 2 | -6 | -7  | 62.29  | 3.54  |
| 2 | -6 | -7  | 56.93  | 3.16  |
| 2 | -6 | -7  | 61.56  | 3.36  |
| 2 | -6 | -7  | 60.09  | 3.29  |
| 2 | -6 | -7  | 58.54  | 2.78  |
| 2 | -6 | -7  | 56.32  | 2.98  |
| 2 | -6 | -7  | 58.34  | 2.82  |

## CIF 31

|   |    |    |        |      |
|---|----|----|--------|------|
| 2 | -6 | -6 | 204.04 | 4.96 |
| 2 | -6 | -6 | 193.56 | 5.99 |
| 2 | -6 | -6 | 195.52 | 5.64 |
| 2 | -6 | -6 | 176.83 | 5.61 |
| 2 | -6 | -6 | 184.74 | 5.60 |
| 2 | -6 | -6 | 177.84 | 4.90 |
| 2 | -6 | -6 | 202.47 | 5.12 |
| 2 | -6 | -6 | 188.65 | 5.32 |
| 2 | -6 | -6 | 204.55 | 5.18 |
| 2 | -6 | -5 | 1.31   | 0.76 |
| 2 | -6 | -5 | 0.54   | 0.94 |
| 2 | -6 | -5 | -0.13  | 0.79 |
| 2 | -6 | -5 | 2.15   | 0.94 |
| 2 | -6 | -5 | 0.98   | 0.84 |
| 2 | -6 | -5 | 0.44   | 0.61 |
| 2 | -6 | -5 | 1.94   | 0.80 |
| 2 | -6 | -5 | -0.03  | 0.60 |
| 2 | -6 | -5 | 0.35   | 0.69 |
| 2 | -6 | -5 | -0.08  | 0.75 |
| 2 | -6 | -4 | 59.58  | 2.84 |
| 2 | -6 | -4 | 57.09  | 2.88 |
| 2 | -6 | -4 | 56.21  | 2.72 |
| 2 | -6 | -4 | 59.89  | 2.53 |
| 2 | -6 | -4 | 63.20  | 2.63 |
| 2 | -6 | -4 | 59.15  | 2.69 |
| 2 | -6 | -4 | 57.65  | 2.47 |
| 2 | -6 | -4 | 57.28  | 2.52 |
| 2 | -6 | -3 | 19.63  | 1.57 |
| 2 | -6 | -3 | 17.08  | 1.47 |
| 2 | -6 | -3 | 17.83  | 1.34 |
| 2 | -6 | -3 | 20.86  | 1.47 |
| 2 | -6 | -3 | 18.39  | 1.62 |
| 2 | -6 | -3 | 19.06  | 1.66 |
| 2 | -6 | -3 | 18.76  | 1.50 |
| 2 | -6 | -3 | 19.35  | 1.53 |
| 2 | -6 | -3 | 21.90  | 1.47 |
| 2 | -6 | -3 | 19.78  | 1.32 |
| 2 | -6 | -2 | 420.79 | 6.73 |
| 2 | -6 | -2 | 407.24 | 6.57 |
| 2 | -6 | -2 | 464.46 | 7.60 |
| 2 | -6 | -2 | 463.57 | 7.24 |

## CIF 31

|   |    |    |         |       |
|---|----|----|---------|-------|
| 2 | -6 | -2 | 505.15  | 7.85  |
| 2 | -6 | -2 | 418.18  | 6.80  |
| 2 | -6 | -2 | 440.78  | 7.03  |
| 2 | -6 | -2 | 440.78  | 7.32  |
| 2 | -6 | -2 | 466.04  | 7.86  |
| 2 | -6 | -2 | 448.19  | 7.64  |
| 2 | -6 | -2 | 457.52  | 6.98  |
| 2 | -6 | -2 | 450.57  | 7.13  |
| 2 | -6 | -2 | 443.25  | 6.30  |
| 2 | -6 | -1 | 125.36  | 3.15  |
| 2 | -6 | -1 | 97.00   | 3.16  |
| 2 | -6 | -1 | 116.70  | 3.39  |
| 2 | -6 | -1 | 120.48  | 3.28  |
| 2 | -6 | -1 | 126.14  | 3.42  |
| 2 | -6 | -1 | 117.42  | 3.19  |
| 2 | -6 | -1 | 120.03  | 3.47  |
| 2 | -6 | -1 | 116.55  | 3.16  |
| 2 | -6 | -1 | 117.88  | 3.27  |
| 2 | -6 | -1 | 117.71  | 3.48  |
| 2 | -6 | -1 | 129.29  | 3.69  |
| 2 | -6 | -1 | 118.25  | 3.48  |
| 2 | -6 | -1 | 119.73  | 3.21  |
| 2 | -6 | -1 | 111.78  | 3.06  |
| 2 | -6 | -1 | 109.71  | 3.10  |
| 2 | -6 | 0  | 5938.96 | 53.47 |
| 2 | -6 | 0  | 5917.00 | 53.73 |
| 2 | -6 | 0  | 5720.18 | 53.52 |
| 2 | -6 | 0  | 6336.60 | 53.79 |
| 2 | -6 | 0  | 6007.48 | 53.21 |
| 2 | -6 | 0  | 6139.95 | 53.93 |
| 2 | -6 | 0  | 5829.97 | 53.20 |
| 2 | -6 | 0  | 6206.92 | 53.77 |
| 2 | -6 | 0  | 6292.38 | 54.48 |
| 2 | -6 | 0  | 5743.04 | 53.58 |
| 2 | -6 | 0  | 6007.26 | 52.82 |
| 2 | -6 | 0  | 6035.71 | 52.70 |
| 2 | -6 | 0  | 6035.95 | 51.83 |
| 2 | -6 | 1  | 2215.34 | 23.46 |
| 2 | -6 | 1  | 2362.45 | 23.67 |
| 2 | -6 | 1  | 2320.12 | 23.68 |
| 2 | -6 | 1  | 2286.01 | 23.43 |

## CIF 31

|   |    |   |         |       |
|---|----|---|---------|-------|
| 2 | -6 | 1 | 2380.98 | 23.81 |
| 2 | -6 | 1 | 2409.07 | 23.65 |
| 2 | -6 | 1 | 2353.49 | 23.89 |
| 2 | -6 | 1 | 2387.95 | 24.33 |
| 2 | -6 | 1 | 2271.07 | 23.56 |
| 2 | -6 | 1 | 2457.78 | 23.79 |
| 2 | -6 | 1 | 2446.26 | 22.66 |
| 2 | -6 | 1 | 2559.83 | 22.82 |
| 2 | -6 | 2 | 2006.44 | 20.69 |
| 2 | -6 | 2 | 2042.61 | 20.51 |
| 2 | -6 | 2 | 1864.13 | 20.32 |
| 2 | -6 | 2 | 1928.07 | 20.12 |
| 2 | -6 | 2 | 1970.56 | 19.02 |
| 2 | -6 | 2 | 1944.71 | 20.55 |
| 2 | -6 | 2 | 1973.78 | 21.06 |
| 2 | -6 | 2 | 1963.32 | 20.44 |
| 2 | -6 | 2 | 2033.42 | 20.39 |
| 2 | -6 | 2 | 1905.15 | 18.83 |
| 2 | -6 | 2 | 2013.92 | 19.91 |
| 2 | -6 | 3 | 163.99  | 4.29  |
| 2 | -6 | 3 | 149.21  | 3.74  |
| 2 | -6 | 3 | 158.14  | 3.53  |
| 2 | -6 | 3 | 138.07  | 3.76  |
| 2 | -6 | 3 | 140.55  | 3.73  |
| 2 | -6 | 3 | 156.05  | 3.02  |
| 2 | -6 | 4 | 373.99  | 6.32  |
| 2 | -6 | 4 | 458.70  | 6.85  |
| 2 | -6 | 4 | 413.08  | 6.76  |
| 2 | -6 | 4 | 420.43  | 6.86  |
| 2 | -6 | 4 | 422.53  | 7.48  |
| 2 | -6 | 4 | 477.88  | 7.56  |
| 2 | -6 | 4 | 385.46  | 6.85  |
| 2 | -6 | 5 | 205.74  | 5.20  |
| 2 | -6 | 5 | 221.96  | 4.66  |
| 2 | -6 | 5 | 216.07  | 4.89  |
| 2 | -6 | 5 | 215.12  | 5.21  |
| 2 | -6 | 5 | 182.95  | 4.75  |
| 2 | -6 | 5 | 250.20  | 5.55  |
| 2 | -6 | 5 | 213.10  | 4.41  |
| 2 | -6 | 6 | 168.99  | 4.88  |
| 2 | -6 | 6 | 163.32  | 4.18  |

## CIF 31

|   |    |     |        |      |
|---|----|-----|--------|------|
| 2 | -6 | 6   | 155.16 | 4.49 |
| 2 | -6 | 6   | 156.51 | 4.50 |
| 2 | -6 | 6   | 176.90 | 4.80 |
| 2 | -6 | 7   | 20.59  | 1.78 |
| 2 | -6 | 7   | 24.51  | 1.68 |
| 2 | -6 | 7   | 17.99  | 1.61 |
| 2 | -6 | 7   | 19.93  | 1.83 |
| 2 | -6 | 8   | 0.82   | 0.83 |
| 2 | -6 | 8   | 1.04   | 0.80 |
| 2 | -6 | 8   | 1.21   | 1.12 |
| 2 | -6 | 8   | 3.64   | 0.88 |
| 2 | -6 | 8   | 2.53   | 1.23 |
| 2 | -6 | 9   | 2.72   | 0.90 |
| 2 | -6 | 9   | 1.79   | 0.86 |
| 2 | -6 | 9   | 1.51   | 1.04 |
| 2 | -6 | 9   | 1.71   | 1.38 |
| 2 | -6 | 10  | 85.33  | 3.30 |
| 2 | -6 | 10  | 82.93  | 3.73 |
| 2 | -6 | 11  | 0.21   | 1.33 |
| 2 | -6 | 11  | 0.31   | 0.89 |
| 2 | -6 | 11  | 0.99   | 1.67 |
| 2 | -6 | 12  | 85.28  | 4.11 |
| 2 | -6 | 12  | 87.10  | 4.19 |
| 2 | -6 | 12  | 86.94  | 3.45 |
| 2 | -6 | 12  | 92.88  | 4.01 |
| 2 | -6 | 13  | 14.66  | 1.29 |
| 2 | -6 | 13  | 15.97  | 1.38 |
| 2 | -5 | -13 | 63.70  | 2.01 |
| 2 | -5 | -13 | 66.17  | 1.98 |
| 2 | -5 | -12 | 321.25 | 5.44 |
| 2 | -5 | -12 | 320.68 | 5.58 |
| 2 | -5 | -11 | 20.24  | 1.81 |
| 2 | -5 | -11 | 19.39  | 1.98 |
| 2 | -5 | -11 | 21.21  | 1.46 |
| 2 | -5 | -11 | 21.43  | 1.68 |
| 2 | -5 | -11 | 20.17  | 1.66 |
| 2 | -5 | -10 | 56.98  | 3.11 |
| 2 | -5 | -10 | 65.83  | 2.74 |
| 2 | -5 | -10 | 60.95  | 2.27 |
| 2 | -5 | -10 | 59.72  | 3.02 |
| 2 | -5 | -10 | 59.28  | 2.51 |

## CIF 31

|   |    |    |         |       |
|---|----|----|---------|-------|
| 2 | -5 | -9 | 191.71  | 5.00  |
| 2 | -5 | -9 | 183.65  | 4.23  |
| 2 | -5 | -9 | 178.55  | 4.70  |
| 2 | -5 | -8 | 630.64  | 10.00 |
| 2 | -5 | -8 | 579.10  | 11.04 |
| 2 | -5 | -8 | 564.62  | 10.12 |
| 2 | -5 | -8 | 616.82  | 9.58  |
| 2 | -5 | -8 | 647.00  | 10.79 |
| 2 | -5 | -8 | 661.61  | 10.08 |
| 2 | -5 | -7 | 338.62  | 7.86  |
| 2 | -5 | -7 | 351.90  | 7.94  |
| 2 | -5 | -7 | 328.52  | 7.74  |
| 2 | -5 | -7 | 350.61  | 7.39  |
| 2 | -5 | -7 | 380.57  | 7.13  |
| 2 | -5 | -7 | 368.21  | 6.91  |
| 2 | -5 | -7 | 343.74  | 7.41  |
| 2 | -5 | -7 | 365.30  | 6.98  |
| 2 | -5 | -6 | 124.58  | 4.30  |
| 2 | -5 | -6 | 120.21  | 4.36  |
| 2 | -5 | -6 | 120.42  | 4.26  |
| 2 | -5 | -6 | 119.32  | 3.94  |
| 2 | -5 | -6 | 130.60  | 3.78  |
| 2 | -5 | -6 | 121.09  | 3.91  |
| 2 | -5 | -6 | 118.77  | 3.98  |
| 2 | -5 | -5 | 1.35    | 0.76  |
| 2 | -5 | -5 | 2.78    | 0.91  |
| 2 | -5 | -5 | 2.89    | 0.88  |
| 2 | -5 | -5 | 2.40    | 0.73  |
| 2 | -5 | -5 | 3.04    | 0.82  |
| 2 | -5 | -5 | 2.55    | 0.75  |
| 2 | -5 | -5 | 2.29    | 0.82  |
| 2 | -5 | -4 | 26.10   | 1.75  |
| 2 | -5 | -4 | 24.21   | 1.54  |
| 2 | -5 | -4 | 23.93   | 1.29  |
| 2 | -5 | -4 | 25.78   | 1.55  |
| 2 | -5 | -4 | 22.75   | 1.48  |
| 2 | -5 | -3 | 1002.14 | 12.45 |
| 2 | -5 | -3 | 1044.61 | 12.30 |
| 2 | -5 | -3 | 1153.16 | 13.06 |
| 2 | -5 | -3 | 1103.25 | 12.29 |
| 2 | -5 | -3 | 1051.86 | 11.36 |

## CIF 31

|   |    |    |         |       |
|---|----|----|---------|-------|
| 2 | -5 | -3 | 1056.02 | 11.67 |
| 2 | -5 | -3 | 1074.28 | 11.88 |
| 2 | -5 | -3 | 1053.32 | 12.86 |
| 2 | -5 | -3 | 1009.55 | 12.10 |
| 2 | -5 | -2 | 1602.75 | 16.09 |
| 2 | -5 | -2 | 1665.95 | 15.78 |
| 2 | -5 | -2 | 1663.94 | 17.49 |
| 2 | -5 | -2 | 1689.36 | 17.21 |
| 2 | -5 | -2 | 1725.41 | 17.76 |
| 2 | -5 | -2 | 1677.98 | 17.13 |
| 2 | -5 | -2 | 1698.98 | 16.45 |
| 2 | -5 | -2 | 1635.14 | 16.90 |
| 2 | -5 | -2 | 1612.65 | 17.05 |
| 2 | -5 | -2 | 1754.03 | 17.92 |
| 2 | -5 | -2 | 1661.03 | 17.60 |
| 2 | -5 | -1 | 133.61  | 2.68  |
| 2 | -5 | -1 | 108.70  | 2.77  |
| 2 | -5 | -1 | 131.44  | 3.23  |
| 2 | -5 | -1 | 127.15  | 3.08  |
| 2 | -5 | -1 | 137.96  | 3.34  |
| 2 | -5 | -1 | 135.82  | 3.16  |
| 2 | -5 | -1 | 139.55  | 2.92  |
| 2 | -5 | -1 | 122.77  | 3.01  |
| 2 | -5 | -1 | 124.81  | 3.17  |
| 2 | -5 | -1 | 151.92  | 3.50  |
| 2 | -5 | -1 | 128.98  | 2.96  |
| 2 | -5 | 0  | 7439.68 | 64.37 |
| 2 | -5 | 0  | 7275.55 | 64.54 |
| 2 | -5 | 0  | 7414.15 | 64.75 |
| 2 | -5 | 0  | 7636.53 | 64.64 |
| 2 | -5 | 0  | 7839.39 | 64.60 |
| 2 | -5 | 0  | 7752.65 | 62.43 |
| 2 | -5 | 0  | 7458.31 | 64.99 |
| 2 | -5 | 0  | 7373.47 | 64.71 |
| 2 | -5 | 1  | 428.47  | 6.27  |
| 2 | -5 | 1  | 451.36  | 6.54  |
| 2 | -5 | 1  | 415.82  | 5.25  |
| 2 | -5 | 1  | 420.30  | 6.54  |
| 2 | -5 | 1  | 437.85  | 6.35  |
| 2 | -5 | 1  | 404.06  | 5.51  |
| 2 | -5 | 2  | 184.87  | 3.92  |



## CIF 31

|   |    |    |         |       |
|---|----|----|---------|-------|
| 2 | -5 | 2  | 184.69  | 3.77  |
| 2 | -5 | 2  | 185.08  | 3.33  |
| 2 | -5 | 2  | 183.18  | 3.81  |
| 2 | -5 | 2  | 196.48  | 3.20  |
| 2 | -5 | 3  | 761.69  | 9.71  |
| 2 | -5 | 3  | 731.15  | 8.81  |
| 2 | -5 | 3  | 756.19  | 9.27  |
| 2 | -5 | 3  | 756.98  | 9.05  |
| 2 | -5 | 3  | 755.43  | 9.82  |
| 2 | -5 | 3  | 756.12  | 9.54  |
| 2 | -5 | 3  | 759.37  | 7.88  |
| 2 | -5 | 4  | 2794.06 | 25.86 |
| 2 | -5 | 4  | 2563.19 | 25.70 |
| 2 | -5 | 4  | 2942.95 | 26.55 |
| 2 | -5 | 4  | 2685.02 | 26.80 |
| 2 | -5 | 4  | 2894.25 | 26.87 |
| 2 | -5 | 5  | 2091.20 | 21.21 |
| 2 | -5 | 5  | 2046.36 | 20.21 |
| 2 | -5 | 5  | 2006.66 | 20.90 |
| 2 | -5 | 5  | 2023.23 | 21.01 |
| 2 | -5 | 5  | 2029.26 | 21.07 |
| 2 | -5 | 6  | 608.59  | 9.21  |
| 2 | -5 | 6  | 570.50  | 8.31  |
| 2 | -5 | 6  | 630.50  | 9.36  |
| 2 | -5 | 6  | 573.05  | 8.72  |
| 2 | -5 | 6  | 529.54  | 8.69  |
| 2 | -5 | 7  | 1103.41 | 14.29 |
| 2 | -5 | 7  | 1101.90 | 13.75 |
| 2 | -5 | 7  | 1143.30 | 14.89 |
| 2 | -5 | 7  | 1076.96 | 13.82 |
| 2 | -5 | 7  | 1175.83 | 14.83 |
| 2 | -5 | 8  | 410.89  | 7.71  |
| 2 | -5 | 8  | 393.96  | 7.00  |
| 2 | -5 | 8  | 397.67  | 7.90  |
| 2 | -5 | 9  | 28.05   | 1.97  |
| 2 | -5 | 9  | 29.89   | 2.03  |
| 2 | -5 | 9  | 29.02   | 2.27  |
| 2 | -5 | 9  | 32.41   | 2.50  |
| 2 | -5 | 10 | 1.72    | 0.94  |
| 2 | -5 | 10 | 0.70    | 0.97  |
| 2 | -5 | 10 | 1.01    | 0.69  |

## CIF 31

|   |    |     |        |       |
|---|----|-----|--------|-------|
| 2 | -5 | 10  | 0.06   | 1.00  |
| 2 | -5 | 11  | 71.69  | 3.02  |
| 2 | -5 | 11  | 79.56  | 3.80  |
| 2 | -5 | 11  | 73.98  | 3.46  |
| 2 | -5 | 11  | 69.36  | 3.40  |
| 2 | -5 | 12  | 4.96   | 1.61  |
| 2 | -5 | 12  | 6.07   | 1.55  |
| 2 | -5 | 12  | 8.97   | 1.39  |
| 2 | -5 | 13  | 3.30   | 0.85  |
| 2 | -5 | 14  | 0.66   | 0.47  |
| 2 | -4 | -13 | 1.41   | 0.79  |
| 2 | -4 | -13 | 1.60   | 0.70  |
| 2 | -4 | -13 | 2.42   | 0.69  |
| 2 | -4 | -13 | 2.41   | 0.70  |
| 2 | -4 | -12 | 8.45   | 1.45  |
| 2 | -4 | -12 | 8.61   | 1.28  |
| 2 | -4 | -12 | 13.59  | 1.36  |
| 2 | -4 | -12 | 11.97  | 1.06  |
| 2 | -4 | -12 | 14.63  | 1.47  |
| 2 | -4 | -11 | 2.73   | 1.09  |
| 2 | -4 | -11 | 3.33   | 0.87  |
| 2 | -4 | -11 | 3.63   | 1.10  |
| 2 | -4 | -11 | 3.46   | 0.84  |
| 2 | -4 | -11 | 3.33   | 0.77  |
| 2 | -4 | -11 | 3.95   | 1.23  |
| 2 | -4 | -10 | 526.97 | 10.22 |
| 2 | -4 | -10 | 577.93 | 9.00  |
| 2 | -4 | -10 | 592.22 | 9.62  |
| 2 | -4 | -10 | 545.54 | 8.65  |
| 2 | -4 | -10 | 568.93 | 10.09 |
| 2 | -4 | -10 | 563.01 | 8.80  |
| 2 | -4 | -9  | 21.13  | 1.75  |
| 2 | -4 | -9  | 22.38  | 1.85  |
| 2 | -4 | -9  | 16.58  | 1.77  |
| 2 | -4 | -9  | 20.61  | 1.56  |
| 2 | -4 | -9  | 17.56  | 1.90  |
| 2 | -4 | -9  | 19.04  | 1.60  |
| 2 | -4 | -8  | 692.98 | 11.33 |
| 2 | -4 | -8  | 651.04 | 11.60 |
| 2 | -4 | -8  | 639.12 | 11.07 |
| 2 | -4 | -8  | 685.83 | 9.78  |

## CIF 31

|   |    |    |         |       |
|---|----|----|---------|-------|
| 2 | -4 | -7 | 2.52    | 0.86  |
| 2 | -4 | -7 | 1.73    | 0.87  |
| 2 | -4 | -7 | 2.06    | 0.90  |
| 2 | -4 | -7 | 1.47    | 0.97  |
| 2 | -4 | -7 | 4.06    | 1.01  |
| 2 | -4 | -7 | 2.89    | 0.74  |
| 2 | -4 | -7 | 1.65    | 0.85  |
| 2 | -4 | -6 | 2462.94 | 24.58 |
| 2 | -4 | -6 | 2463.47 | 25.31 |
| 2 | -4 | -6 | 2120.81 | 24.70 |
| 2 | -4 | -6 | 2248.27 | 24.90 |
| 2 | -4 | -6 | 2211.19 | 24.14 |
| 2 | -4 | -6 | 2356.52 | 23.50 |
| 2 | -4 | -6 | 2388.77 | 23.15 |
| 2 | -4 | -6 | 2319.53 | 24.25 |
| 2 | -4 | -6 | 2179.79 | 23.92 |
| 2 | -4 | -5 | 36.37   | 1.57  |
| 2 | -4 | -5 | 39.16   | 2.22  |
| 2 | -4 | -5 | 36.82   | 2.07  |
| 2 | -4 | -5 | 36.19   | 2.00  |
| 2 | -4 | -5 | 38.75   | 2.00  |
| 2 | -4 | -5 | 37.95   | 1.93  |
| 2 | -4 | -5 | 40.73   | 1.82  |
| 2 | -4 | -5 | 32.77   | 1.66  |
| 2 | -4 | -5 | 36.07   | 1.89  |
| 2 | -4 | -4 | 290.56  | 4.42  |
| 2 | -4 | -4 | 276.26  | 5.28  |
| 2 | -4 | -4 | 299.74  | 5.21  |
| 2 | -4 | -4 | 290.17  | 4.76  |
| 2 | -4 | -4 | 285.56  | 4.31  |
| 2 | -4 | -4 | 301.63  | 4.91  |
| 2 | -4 | -3 | 456.92  | 5.76  |
| 2 | -4 | -3 | 450.43  | 6.65  |
| 2 | -4 | -3 | 438.37  | 6.36  |
| 2 | -4 | -3 | 463.15  | 6.09  |
| 2 | -4 | -3 | 445.39  | 5.84  |
| 2 | -4 | -3 | 422.43  | 5.75  |
| 2 | -4 | -3 | 415.51  | 6.52  |
| 2 | -4 | -3 | 449.29  | 6.19  |
| 2 | -4 | -3 | 410.99  | 4.84  |
| 2 | -4 | -2 | 651.57  | 7.27  |

## CIF 31

|   |    |    |         |       |
|---|----|----|---------|-------|
| 2 | -4 | -2 | 577.44  | 6.89  |
| 2 | -4 | -2 | 623.71  | 7.81  |
| 2 | -4 | -2 | 551.34  | 7.78  |
| 2 | -4 | -2 | 621.04  | 7.80  |
| 2 | -4 | -2 | 665.04  | 7.60  |
| 2 | -4 | -2 | 677.62  | 8.31  |
| 2 | -4 | -2 | 653.46  | 7.63  |
| 2 | -4 | -2 | 620.53  | 7.60  |
| 2 | -4 | -2 | 698.71  | 8.26  |
| 2 | -4 | -1 | 19.35   | 0.99  |
| 2 | -4 | -1 | 23.62   | 1.28  |
| 2 | -4 | -1 | 21.24   | 1.17  |
| 2 | -4 | -1 | 20.11   | 1.11  |
| 2 | -4 | -1 | 20.00   | 1.18  |
| 2 | -4 | -1 | 20.17   | 1.13  |
| 2 | -4 | -1 | 23.16   | 0.65  |
| 2 | -4 | -1 | 19.41   | 1.17  |
| 2 | -4 | -1 | 18.75   | 1.08  |
| 2 | -4 | -1 | 19.92   | 1.00  |
| 2 | -4 | 0  | 2594.06 | 24.16 |
| 2 | -4 | 0  | 2762.21 | 24.84 |
| 2 | -4 | 0  | 2717.45 | 24.31 |
| 2 | -4 | 0  | 2736.69 | 26.71 |
| 2 | -4 | 0  | 2743.43 | 24.83 |
| 2 | -4 | 0  | 2820.58 | 24.56 |
| 2 | -4 | 0  | 2548.48 | 23.76 |
| 2 | -4 | 1  | 9012.81 | 76.66 |
| 2 | -4 | 1  | 9234.91 | 76.25 |
| 2 | -4 | 2  | 138.73  | 3.00  |
| 2 | -4 | 2  | 134.84  | 2.25  |
| 2 | -4 | 2  | 132.72  | 2.83  |
| 2 | -4 | 2  | 135.03  | 2.21  |
| 2 | -4 | 3  | 3388.52 | 27.89 |
| 2 | -4 | 3  | 3321.25 | 29.83 |
| 2 | -4 | 3  | 3557.16 | 30.23 |
| 2 | -4 | 3  | 3417.03 | 30.23 |
| 2 | -4 | 3  | 3484.80 | 30.57 |
| 2 | -4 | 4  | 118.43  | 2.99  |
| 2 | -4 | 4  | 107.88  | 2.53  |
| 2 | -4 | 4  | 124.52  | 3.00  |
| 2 | -4 | 4  | 101.60  | 2.79  |

## CIF 31

|   |    |     |         |       |
|---|----|-----|---------|-------|
| 2 | -4 | 4   | 111.28  | 2.86  |
| 2 | -4 | 5   | 231.94  | 4.58  |
| 2 | -4 | 5   | 227.29  | 3.87  |
| 2 | -4 | 5   | 238.53  | 4.72  |
| 2 | -4 | 5   | 226.26  | 4.50  |
| 2 | -4 | 6   | 1865.82 | 20.05 |
| 2 | -4 | 6   | 1760.54 | 18.87 |
| 2 | -4 | 7   | 45.77   | 2.16  |
| 2 | -4 | 7   | 44.54   | 2.01  |
| 2 | -4 | 8   | 441.90  | 7.67  |
| 2 | -4 | 8   | 467.51  | 8.71  |
| 2 | -4 | 9   | 33.04   | 1.94  |
| 2 | -4 | 9   | 35.65   | 2.28  |
| 2 | -4 | 10  | 96.41   | 4.35  |
| 2 | -4 | 11  | 67.63   | 3.46  |
| 2 | -4 | 11  | 74.11   | 3.58  |
| 2 | -4 | 12  | 5.10    | 0.98  |
| 2 | -4 | 12  | 5.99    | 1.27  |
| 2 | -4 | 12  | 4.09    | 1.27  |
| 2 | -4 | 12  | 4.76    | 1.15  |
| 2 | -4 | 13  | 5.06    | 0.98  |
| 2 | -3 | -14 | 4.23    | 0.76  |
| 2 | -3 | -14 | 4.41    | 0.60  |
| 2 | -3 | -14 | 4.32    | 0.49  |
| 2 | -3 | -14 | 3.74    | 0.67  |
| 2 | -3 | -13 | 252.17  | 5.57  |
| 2 | -3 | -13 | 241.22  | 5.67  |
| 2 | -3 | -13 | 279.51  | 5.12  |
| 2 | -3 | -13 | 272.02  | 4.81  |
| 2 | -3 | -13 | 248.18  | 5.38  |
| 2 | -3 | -12 | 171.97  | 5.20  |
| 2 | -3 | -12 | 158.32  | 4.97  |
| 2 | -3 | -12 | 180.48  | 4.58  |
| 2 | -3 | -12 | 164.86  | 4.21  |
| 2 | -3 | -12 | 181.11  | 5.05  |
| 2 | -3 | -11 | 44.86   | 2.82  |
| 2 | -3 | -11 | 40.31   | 2.88  |
| 2 | -3 | -11 | 44.12   | 2.44  |
| 2 | -3 | -11 | 36.57   | 2.16  |
| 2 | -3 | -11 | 38.55   | 1.96  |
| 2 | -3 | -11 | 36.19   | 2.59  |

## CIF 31

|   |    |     |         |       |
|---|----|-----|---------|-------|
| 2 | -3 | -10 | 197.81  | 5.96  |
| 2 | -3 | -10 | 195.49  | 4.71  |
| 2 | -3 | -10 | 197.34  | 6.32  |
| 2 | -3 | -10 | 185.55  | 5.60  |
| 2 | -3 | -9  | 252.62  | 5.59  |
| 2 | -3 | -9  | 256.60  | 6.96  |
| 2 | -3 | -9  | 244.25  | 6.21  |
| 2 | -3 | -8  | 32.50   | 2.27  |
| 2 | -3 | -8  | 31.71   | 2.32  |
| 2 | -3 | -8  | 34.97   | 2.39  |
| 2 | -3 | -8  | 40.06   | 2.10  |
| 2 | -3 | -8  | 31.63   | 2.13  |
| 2 | -3 | -8  | 36.78   | 1.81  |
| 2 | -3 | -8  | 34.96   | 2.25  |
| 2 | -3 | -7  | 92.09   | 3.02  |
| 2 | -3 | -7  | 80.02   | 3.22  |
| 2 | -3 | -7  | 89.49   | 3.63  |
| 2 | -3 | -7  | 73.45   | 3.21  |
| 2 | -3 | -7  | 77.10   | 3.26  |
| 2 | -3 | -7  | 78.28   | 3.24  |
| 2 | -3 | -7  | 70.22   | 2.53  |
| 2 | -3 | -7  | 105.92  | 3.45  |
| 2 | -3 | -7  | 73.75   | 2.45  |
| 2 | -3 | -6  | 206.72  | 4.36  |
| 2 | -3 | -6  | 212.23  | 4.91  |
| 2 | -3 | -6  | 196.20  | 4.91  |
| 2 | -3 | -6  | 211.94  | 5.02  |
| 2 | -3 | -6  | 207.34  | 4.83  |
| 2 | -3 | -6  | 210.00  | 4.62  |
| 2 | -3 | -6  | 205.35  | 4.03  |
| 2 | -3 | -6  | 202.89  | 4.74  |
| 2 | -3 | -5  | 2649.82 | 23.99 |
| 2 | -3 | -5  | 2620.47 | 25.56 |
| 2 | -3 | -5  | 2285.18 | 24.02 |
| 2 | -3 | -5  | 2467.60 | 24.79 |
| 2 | -3 | -5  | 2755.94 | 25.55 |
| 2 | -3 | -5  | 2758.21 | 25.36 |
| 2 | -3 | -5  | 2582.71 | 25.03 |
| 2 | -3 | -5  | 2558.67 | 24.34 |
| 2 | -3 | -5  | 2353.58 | 22.14 |
| 2 | -3 | -4  | 87.25   | 2.26  |

## CIF 31

|   |    |    |         |       |
|---|----|----|---------|-------|
| 2 | -3 | -4 | 90.59   | 2.68  |
| 2 | -3 | -4 | 83.52   | 2.54  |
| 2 | -3 | -4 | 85.76   | 2.52  |
| 2 | -3 | -4 | 85.25   | 2.36  |
| 2 | -3 | -4 | 92.15   | 1.98  |
| 2 | -3 | -4 | 81.95   | 1.69  |
| 2 | -3 | -3 | 154.52  | 2.19  |
| 2 | -3 | -3 | 184.24  | 3.17  |
| 2 | -3 | -3 | 180.47  | 3.58  |
| 2 | -3 | -3 | 195.22  | 3.64  |
| 2 | -3 | -3 | 195.79  | 3.57  |
| 2 | -3 | -3 | 192.68  | 3.39  |
| 2 | -3 | -3 | 170.77  | 2.02  |
| 2 | -3 | -3 | 175.51  | 3.82  |
| 2 | -3 | -3 | 165.14  | 2.75  |
| 2 | -3 | -3 | 177.15  | 3.44  |
| 2 | -3 | -2 | 1286.21 | 12.04 |
| 2 | -3 | -2 | 1191.39 | 11.20 |
| 2 | -3 | -2 | 1133.99 | 12.26 |
| 2 | -3 | -2 | 1331.10 | 12.36 |
| 2 | -3 | -2 | 1248.93 | 13.52 |
| 2 | -3 | -2 | 1171.35 | 11.73 |
| 2 | -3 | -2 | 1221.25 | 12.25 |
| 2 | -3 | -1 | 2.64    | 0.40  |
| 2 | -3 | -1 | 2.06    | 0.56  |
| 2 | -3 | -1 | 2.81    | 0.51  |
| 2 | -3 | -1 | 3.07    | 0.77  |
| 2 | -3 | -1 | 3.64    | 0.50  |
| 2 | -3 | -1 | 3.04    | 0.48  |
| 2 | -3 | 0  | 865.25  | 8.80  |
| 2 | -3 | 0  | 878.74  | 8.95  |
| 2 | -3 | 1  | 94.79   | 1.80  |
| 2 | -3 | 1  | 99.20   | 2.16  |
| 2 | -3 | 2  | 1346.63 | 11.64 |
| 2 | -3 | 2  | 1316.93 | 12.46 |
| 2 | -3 | 3  | 796.26  | 7.26  |
| 2 | -3 | 3  | 789.95  | 8.72  |
| 2 | -3 | 3  | 770.01  | 6.79  |
| 2 | -3 | 4  | 328.64  | 4.62  |
| 2 | -3 | 4  | 320.88  | 4.31  |
| 2 | -3 | 4  | 327.32  | 4.02  |

## CIF 31

|   |    |     |         |       |
|---|----|-----|---------|-------|
| 2 | -3 | 5   | 207.80  | 4.02  |
| 2 | -3 | 5   | 199.63  | 3.17  |
| 2 | -3 | 5   | 196.44  | 3.77  |
| 2 | -3 | 6   | 1240.12 | 14.91 |
| 2 | -3 | 6   | 1243.31 | 13.73 |
| 2 | -3 | 6   | 1239.30 | 13.54 |
| 2 | -3 | 7   | 21.19   | 1.36  |
| 2 | -3 | 7   | 18.30   | 1.48  |
| 2 | -3 | 7   | 16.07   | 1.12  |
| 2 | -3 | 7   | 19.60   | 1.32  |
| 2 | -3 | 8   | 1029.74 | 12.55 |
| 2 | -3 | 8   | 1035.18 | 14.15 |
| 2 | -3 | 9   | 2.24    | 0.79  |
| 2 | -3 | 9   | 3.72    | 0.91  |
| 2 | -3 | 9   | 2.91    | 0.99  |
| 2 | -3 | 10  | 227.60  | 5.87  |
| 2 | -3 | 10  | 202.63  | 5.50  |
| 2 | -3 | 11  | 7.58    | 1.33  |
| 2 | -3 | 11  | 9.81    | 1.46  |
| 2 | -3 | 12  | 1.57    | 0.77  |
| 2 | -3 | 12  | 2.75    | 0.96  |
| 2 | -3 | 12  | 3.25    | 0.90  |
| 2 | -3 | 13  | 9.73    | 1.18  |
| 2 | -2 | -14 | 50.51   | 1.76  |
| 2 | -2 | -14 | 52.66   | 1.93  |
| 2 | -2 | -14 | 53.54   | 2.21  |
| 2 | -2 | -13 | 146.42  | 4.30  |
| 2 | -2 | -13 | 133.80  | 4.47  |
| 2 | -2 | -13 | 168.81  | 4.04  |
| 2 | -2 | -13 | 159.75  | 4.07  |
| 2 | -2 | -13 | 188.97  | 4.87  |
| 2 | -2 | -12 | 198.63  | 5.68  |
| 2 | -2 | -12 | 210.21  | 5.08  |
| 2 | -2 | -12 | 196.12  | 5.78  |
| 2 | -2 | -12 | 204.80  | 5.62  |
| 2 | -2 | -11 | 374.78  | 8.50  |
| 2 | -2 | -11 | 429.41  | 7.81  |
| 2 | -2 | -11 | 376.35  | 9.37  |
| 2 | -2 | -11 | 387.82  | 7.07  |
| 2 | -2 | -11 | 450.37  | 8.81  |
| 2 | -2 | -10 | 416.57  | 8.75  |



## CIF 31

|   |    |     |         |       |
|---|----|-----|---------|-------|
| 2 | -2 | -10 | 399.24  | 9.46  |
| 2 | -2 | -10 | 388.11  | 7.23  |
| 2 | -2 | -9  | 4038.62 | 38.69 |
| 2 | -2 | -9  | 3989.54 | 34.72 |
| 2 | -2 | -8  | 3.15    | 0.98  |
| 2 | -2 | -8  | 4.04    | 1.05  |
| 2 | -2 | -8  | 6.12    | 0.87  |
| 2 | -2 | -8  | 3.58    | 0.94  |
| 2 | -2 | -8  | 4.48    | 0.69  |
| 2 | -2 | -7  | 626.07  | 9.19  |
| 2 | -2 | -7  | 656.61  | 10.01 |
| 2 | -2 | -7  | 556.81  | 9.35  |
| 2 | -2 | -7  | 577.93  | 8.73  |
| 2 | -2 | -7  | 660.61  | 9.98  |
| 2 | -2 | -7  | 605.49  | 9.18  |
| 2 | -2 | -7  | 606.27  | 9.44  |
| 2 | -2 | -7  | 621.56  | 7.85  |
| 2 | -2 | -6  | 103.10  | 2.97  |
| 2 | -2 | -6  | 125.65  | 3.58  |
| 2 | -2 | -6  | 86.22   | 3.14  |
| 2 | -2 | -6  | 86.24   | 3.01  |
| 2 | -2 | -6  | 106.54  | 3.27  |
| 2 | -2 | -6  | 106.98  | 3.05  |
| 2 | -2 | -6  | 109.59  | 3.19  |
| 2 | -2 | -6  | 94.64   | 2.56  |
| 2 | -2 | -6  | 99.07   | 3.10  |
| 2 | -2 | -6  | 94.98   | 2.81  |
| 2 | -2 | -5  | 356.63  | 5.56  |
| 2 | -2 | -5  | 335.10  | 5.54  |
| 2 | -2 | -5  | 360.40  | 5.69  |
| 2 | -2 | -5  | 344.81  | 5.03  |
| 2 | -2 | -5  | 328.94  | 4.93  |
| 2 | -2 | -4  | 363.22  | 5.09  |
| 2 | -2 | -4  | 355.30  | 5.23  |
| 2 | -2 | -4  | 382.22  | 5.42  |
| 2 | -2 | -4  | 359.69  | 5.21  |
| 2 | -2 | -4  | 386.96  | 4.88  |
| 2 | -2 | -4  | 309.66  | 3.32  |
| 2 | -2 | -4  | 328.10  | 4.03  |
| 2 | -2 | -4  | 360.75  | 5.14  |
| 2 | -2 | -3  | 3165.98 | 24.98 |

## CIF 31

|   |    |    |         |       |
|---|----|----|---------|-------|
| 2 | -2 | -3 | 2821.96 | 22.85 |
| 2 | -2 | -3 | 2533.23 | 24.72 |
| 2 | -2 | -3 | 2957.79 | 25.10 |
| 2 | -2 | -3 | 2990.36 | 25.09 |
| 2 | -2 | -3 | 3130.82 | 25.16 |
| 2 | -2 | -3 | 3033.30 | 25.43 |
| 2 | -2 | -3 | 2613.38 | 23.35 |
| 2 | -2 | -2 | 658.24  | 7.14  |
| 2 | -2 | -2 | 658.64  | 6.86  |
| 2 | -2 | -2 | 623.14  | 7.17  |
| 2 | -2 | -2 | 678.62  | 7.32  |
| 2 | -2 | -2 | 714.10  | 7.86  |
| 2 | -2 | -2 | 661.70  | 6.53  |
| 2 | -2 | -2 | 629.39  | 6.60  |
| 2 | -2 | -1 | 645.80  | 6.52  |
| 2 | -2 | -1 | 667.51  | 7.72  |
| 2 | -2 | -1 | 669.37  | 7.18  |
| 2 | -2 | 0  | 5161.26 | 42.08 |
| 2 | -2 | 1  | 332.43  | 3.84  |
| 2 | -2 | 1  | 343.60  | 4.85  |
| 2 | -2 | 2  | 104.68  | 2.40  |
| 2 | -2 | 2  | 102.49  | 1.93  |
| 2 | -2 | 3  | 947.61  | 8.79  |
| 2 | -2 | 3  | 969.97  | 10.19 |
| 2 | -2 | 4  | 3135.31 | 30.13 |
| 2 | -2 | 4  | 3402.29 | 29.56 |
| 2 | -2 | 5  | 0.79    | 0.45  |
| 2 | -2 | 5  | 1.46    | 0.29  |
| 2 | -2 | 5  | 1.79    | 0.27  |
| 2 | -2 | 5  | 1.82    | 0.60  |
| 2 | -2 | 5  | 1.30    | 0.41  |
| 2 | -2 | 5  | 1.85    | 0.42  |
| 2 | -2 | 6  | 188.21  | 3.70  |
| 2 | -2 | 6  | 186.33  | 4.03  |
| 2 | -2 | 6  | 182.61  | 4.15  |
| 2 | -2 | 6  | 175.84  | 3.15  |
| 2 | -2 | 6  | 174.14  | 3.36  |
| 2 | -2 | 7  | 35.68   | 1.63  |
| 2 | -2 | 7  | 37.30   | 2.01  |
| 2 | -2 | 7  | 35.69   | 1.49  |
| 2 | -2 | 8  | 143.86  | 4.31  |

## CIF 31

|   |    |     |        |      |
|---|----|-----|--------|------|
| 2 | -2 | 8   | 138.18 | 4.06 |
| 2 | -2 | 9   | 468.80 | 8.42 |
| 2 | -2 | 9   | 479.85 | 8.31 |
| 2 | -2 | 10  | 22.74  | 1.95 |
| 2 | -2 | 10  | 22.05  | 1.83 |
| 2 | -2 | 10  | 22.10  | 1.85 |
| 2 | -2 | 11  | 1.10   | 0.77 |
| 2 | -2 | 12  | 28.90  | 1.87 |
| 2 | -1 | -15 | 93.15  | 2.81 |
| 2 | -1 | -15 | 104.41 | 2.68 |
| 2 | -1 | -14 | 367.09 | 6.14 |
| 2 | -1 | -14 | 344.41 | 6.40 |
| 2 | -1 | -13 | 2.31   | 1.09 |
| 2 | -1 | -13 | 2.16   | 0.81 |
| 2 | -1 | -13 | 2.65   | 1.27 |
| 2 | -1 | -13 | 2.13   | 1.13 |
| 2 | -1 | -12 | 1.36   | 0.96 |
| 2 | -1 | -12 | 3.67   | 1.17 |
| 2 | -1 | -12 | 3.44   | 1.24 |
| 2 | -1 | -12 | 6.47   | 1.12 |
| 2 | -1 | -12 | 2.58   | 1.32 |
| 2 | -1 | -12 | 3.14   | 1.24 |
| 2 | -1 | -11 | 31.68  | 2.38 |
| 2 | -1 | -11 | 36.06  | 2.60 |
| 2 | -1 | -11 | 40.08  | 2.24 |
| 2 | -1 | -11 | 34.30  | 3.00 |
| 2 | -1 | -11 | 29.55  | 2.54 |
| 2 | -1 | -11 | 38.82  | 2.63 |
| 2 | -1 | -10 | 137.49 | 5.01 |
| 2 | -1 | -10 | 140.19 | 5.49 |
| 2 | -1 | -10 | 138.12 | 3.89 |
| 2 | -1 | -9  | 77.07  | 3.72 |
| 2 | -1 | -9  | 73.68  | 3.24 |
| 2 | -1 | -9  | 74.19  | 3.50 |
| 2 | -1 | -9  | 80.91  | 3.45 |
| 2 | -1 | -9  | 73.25  | 3.50 |
| 2 | -1 | -9  | 76.51  | 3.14 |
| 2 | -1 | -8  | 44.71  | 2.41 |
| 2 | -1 | -8  | 48.89  | 2.43 |
| 2 | -1 | -8  | 46.01  | 2.55 |
| 2 | -1 | -8  | 43.66  | 2.58 |

## CIF 31

|   |    |    |         |       |
|---|----|----|---------|-------|
| 2 | -1 | -8 | 38.49   | 2.27  |
| 2 | -1 | -8 | 46.34   | 2.58  |
| 2 | -1 | -8 | 44.92   | 2.55  |
| 2 | -1 | -8 | 47.09   | 2.29  |
| 2 | -1 | -8 | 41.84   | 1.59  |
| 2 | -1 | -7 | 6078.97 | 53.94 |
| 2 | -1 | -7 | 6098.73 | 54.43 |
| 2 | -1 | -7 | 5725.84 | 52.53 |
| 2 | -1 | -7 | 6102.03 | 53.65 |
| 2 | -1 | -7 | 6370.70 | 55.01 |
| 2 | -1 | -7 | 5783.51 | 54.37 |
| 2 | -1 | -7 | 6046.41 | 54.36 |
| 2 | -1 | -7 | 5921.57 | 53.19 |
| 2 | -1 | -6 | 538.56  | 7.74  |
| 2 | -1 | -6 | 509.28  | 6.22  |
| 2 | -1 | -6 | 514.04  | 7.00  |
| 2 | -1 | -6 | 501.98  | 7.04  |
| 2 | -1 | -6 | 484.99  | 7.62  |
| 2 | -1 | -6 | 591.78  | 8.24  |
| 2 | -1 | -6 | 574.80  | 8.05  |
| 2 | -1 | -6 | 552.46  | 7.43  |
| 2 | -1 | -6 | 460.00  | 5.36  |
| 2 | -1 | -5 | 15.28   | 0.81  |
| 2 | -1 | -5 | 7.03    | 0.84  |
| 2 | -1 | -5 | 6.57    | 0.82  |
| 2 | -1 | -5 | 7.29    | 0.86  |
| 2 | -1 | -5 | 6.68    | 0.48  |
| 2 | -1 | -5 | 8.93    | 0.81  |
| 2 | -1 | -5 | 11.17   | 0.97  |
| 2 | -1 | -5 | 11.77   | 0.73  |
| 2 | -1 | -4 | 2689.13 | 24.02 |
| 2 | -1 | -4 | 2506.72 | 23.50 |
| 2 | -1 | -4 | 2631.55 | 23.95 |
| 2 | -1 | -4 | 2526.86 | 24.01 |
| 2 | -1 | -4 | 2537.64 | 22.67 |
| 2 | -1 | -4 | 2576.39 | 23.75 |
| 2 | -1 | -4 | 2590.60 | 23.23 |
| 2 | -1 | -3 | 615.58  | 6.77  |
| 2 | -1 | -3 | 596.60  | 6.58  |
| 2 | -1 | -3 | 602.34  | 6.77  |
| 2 | -1 | -2 | 5533.65 | 45.91 |

## CIF 31

|   |    |     |         |       |
|---|----|-----|---------|-------|
| 2 | -1 | -1  | 680.13  | 6.69  |
| 2 | -1 | -1  | 697.34  | 6.47  |
| 2 | -1 | 0   | 271.38  | 2.92  |
| 2 | -1 | 0   | 270.87  | 2.66  |
| 2 | -1 | 1   | 42.66   | 1.30  |
| 2 | -1 | 1   | 41.23   | 1.18  |
| 2 | -1 | 2   | 835.98  | 8.61  |
| 2 | -1 | 3   | 210.31  | 3.56  |
| 2 | -1 | 3   | 207.30  | 2.96  |
| 2 | -1 | 3   | 214.63  | 3.22  |
| 2 | -1 | 4   | 151.49  | 2.30  |
| 2 | -1 | 4   | 154.51  | 2.63  |
| 2 | -1 | 5   | 3.01    | 0.57  |
| 2 | -1 | 5   | 2.22    | 0.14  |
| 2 | -1 | 6   | 4843.14 | 42.24 |
| 2 | -1 | 6   | 4564.85 | 40.40 |
| 2 | -1 | 7   | 16.92   | 1.32  |
| 2 | -1 | 7   | 17.59   | 1.35  |
| 2 | -1 | 8   | 536.80  | 8.95  |
| 2 | -1 | 8   | 552.12  | 8.94  |
| 2 | -1 | 8   | 572.06  | 9.00  |
| 2 | -1 | 8   | 593.75  | 8.45  |
| 2 | -1 | 9   | 135.03  | 4.04  |
| 2 | -1 | 9   | 132.04  | 4.21  |
| 2 | -1 | 9   | 140.31  | 4.27  |
| 2 | -1 | 10  | 145.43  | 4.59  |
| 2 | -1 | 10  | 145.09  | 4.73  |
| 2 | -1 | 11  | 13.26   | 1.34  |
| 2 | 0  | -15 | 72.90   | 2.72  |
| 2 | 0  | -15 | 76.32   | 2.53  |
| 2 | 0  | -14 | 289.64  | 6.65  |
| 2 | 0  | -14 | 306.44  | 6.28  |
| 2 | 0  | -13 | 161.25  | 5.57  |
| 2 | 0  | -13 | 174.36  | 5.55  |
| 2 | 0  | -13 | 200.71  | 4.31  |
| 2 | 0  | -13 | 175.86  | 6.48  |
| 2 | 0  | -13 | 211.41  | 5.71  |
| 2 | 0  | -12 | 3.80    | 1.34  |
| 2 | 0  | -12 | 4.54    | 1.29  |
| 2 | 0  | -12 | 6.36    | 1.02  |
| 2 | 0  | -12 | 5.05    | 1.73  |

## CIF 31

|   |   |     |         |       |
|---|---|-----|---------|-------|
| 2 | 0 | -11 | 1896.63 | 25.58 |
| 2 | 0 | -11 | 1984.13 | 26.94 |
| 2 | 0 | -11 | 2145.77 | 23.94 |
| 2 | 0 | -11 | 2114.65 | 24.80 |
| 2 | 0 | -11 | 2043.13 | 21.72 |
| 2 | 0 | -10 | 416.10  | 9.44  |
| 2 | 0 | -10 | 409.78  | 9.75  |
| 2 | 0 | -10 | 399.86  | 7.47  |
| 2 | 0 | -10 | 397.30  | 8.43  |
| 2 | 0 | -9  | 54.89   | 2.76  |
| 2 | 0 | -9  | 58.75   | 2.84  |
| 2 | 0 | -9  | 55.82   | 3.10  |
| 2 | 0 | -9  | 59.64   | 3.28  |
| 2 | 0 | -9  | 61.39   | 2.72  |
| 2 | 0 | -9  | 53.86   | 3.03  |
| 2 | 0 | -9  | 55.21   | 2.87  |
| 2 | 0 | -9  | 56.05   | 2.64  |
| 2 | 0 | -8  | 1309.47 | 16.38 |
| 2 | 0 | -8  | 1293.08 | 14.41 |
| 2 | 0 | -8  | 1373.31 | 16.16 |
| 2 | 0 | -8  | 1228.73 | 15.50 |
| 2 | 0 | -8  | 1234.54 | 14.46 |
| 2 | 0 | -8  | 1473.28 | 16.29 |
| 2 | 0 | -8  | 1431.37 | 17.28 |
| 2 | 0 | -8  | 1479.34 | 17.69 |
| 2 | 0 | -8  | 1084.94 | 15.88 |
| 2 | 0 | -8  | 1319.65 | 16.28 |
| 2 | 0 | -8  | 1239.51 | 15.04 |
| 2 | 0 | -7  | 3079.35 | 30.86 |
| 2 | 0 | -7  | 3171.05 | 30.10 |
| 2 | 0 | -7  | 3116.57 | 29.25 |
| 2 | 0 | -7  | 3163.46 | 29.19 |
| 2 | 0 | -7  | 3146.36 | 30.32 |
| 2 | 0 | -7  | 3053.17 | 30.44 |
| 2 | 0 | -7  | 3153.08 | 28.82 |
| 2 | 0 | -7  | 3039.21 | 31.05 |
| 2 | 0 | -7  | 3164.51 | 30.66 |
| 2 | 0 | -6  | 1194.85 | 13.62 |
| 2 | 0 | -6  | 1191.63 | 12.90 |
| 2 | 0 | -6  | 1189.86 | 12.39 |
| 2 | 0 | -6  | 1171.92 | 11.98 |

## CIF 31

|   |   |    |         |       |
|---|---|----|---------|-------|
| 2 | 0 | -6 | 1077.72 | 12.07 |
| 2 | 0 | -6 | 1165.12 | 13.68 |
| 2 | 0 | -6 | 1237.55 | 13.51 |
| 2 | 0 | -6 | 1104.04 | 10.38 |
| 2 | 0 | -6 | 1159.52 | 11.00 |
| 2 | 0 | -5 | 657.92  | 8.56  |
| 2 | 0 | -5 | 712.76  | 8.41  |
| 2 | 0 | -5 | 732.37  | 8.27  |
| 2 | 0 | -5 | 719.87  | 7.87  |
| 2 | 0 | -5 | 783.45  | 9.13  |
| 2 | 0 | -5 | 741.12  | 8.92  |
| 2 | 0 | -5 | 755.81  | 8.86  |
| 2 | 0 | -5 | 713.50  | 7.13  |
| 2 | 0 | -5 | 692.48  | 7.78  |
| 2 | 0 | -4 | 1835.95 | 16.86 |
| 2 | 0 | -4 | 1727.20 | 16.36 |
| 2 | 0 | -4 | 1959.28 | 16.92 |
| 2 | 0 | -4 | 1729.49 | 15.84 |
| 2 | 0 | -4 | 1566.43 | 16.20 |
| 2 | 0 | -4 | 1918.12 | 16.92 |
| 2 | 0 | -4 | 1886.12 | 16.99 |
| 2 | 0 | -4 | 1485.52 | 15.33 |
| 2 | 0 | -4 | 1667.19 | 15.70 |
| 2 | 0 | -3 | 4795.20 | 38.28 |
| 2 | 0 | -3 | 5015.14 | 38.74 |
| 2 | 0 | -3 | 3955.34 | 37.37 |
| 2 | 0 | -3 | 4904.99 | 37.88 |
| 2 | 0 | -2 | 269.60  | 3.59  |
| 2 | 0 | -2 | 332.62  | 4.33  |
| 2 | 0 | -2 | 228.24  | 3.31  |
| 2 | 0 | -2 | 267.67  | 3.40  |
| 2 | 0 | -2 | 297.33  | 3.35  |
| 2 | 0 | -2 | 260.59  | 3.36  |
| 2 | 0 | -2 | 260.33  | 3.60  |
| 2 | 0 | -2 | 256.33  | 3.27  |
| 2 | 0 | -2 | 229.72  | 3.11  |
| 2 | 0 | -1 | 418.71  | 4.73  |
| 2 | 0 | -1 | 433.80  | 5.09  |
| 2 | 0 | -1 | 432.48  | 4.62  |
| 2 | 0 | -1 | 409.35  | 4.36  |
| 2 | 0 | 0  | 522.56  | 4.59  |

## CIF 31

|   |   |     |         |       |
|---|---|-----|---------|-------|
| 2 | 0 | 0   | 528.37  | 5.06  |
| 2 | 0 | 0   | 548.74  | 6.02  |
| 2 | 0 | 0   | 563.35  | 5.34  |
| 2 | 0 | 0   | 549.30  | 5.37  |
| 2 | 0 | 1   | 1732.95 | 16.62 |
| 2 | 0 | 1   | 2018.07 | 17.02 |
| 2 | 0 | 2   | 2274.32 | 21.82 |
| 2 | 0 | 2   | 2745.15 | 22.08 |
| 2 | 0 | 3   | 4.08    | 0.60  |
| 2 | 0 | 3   | 5.28    | 0.45  |
| 2 | 0 | 4   | 818.01  | 7.92  |
| 2 | 0 | 4   | 807.64  | 8.27  |
| 2 | 0 | 5   | 3354.07 | 31.00 |
| 2 | 0 | 5   | 3208.97 | 29.78 |
| 2 | 0 | 6   | 929.76  | 11.39 |
| 2 | 0 | 6   | 973.65  | 11.55 |
| 2 | 0 | 7   | 1230.81 | 14.46 |
| 2 | 0 | 7   | 1229.97 | 14.58 |
| 2 | 0 | 8   | 61.25   | 2.43  |
| 2 | 0 | 8   | 57.14   | 2.56  |
| 2 | 0 | 8   | 61.79   | 2.71  |
| 2 | 0 | 9   | 837.55  | 12.03 |
| 2 | 0 | 11  | 135.84  | 3.88  |
| 2 | 1 | -15 | 24.02   | 1.72  |
| 2 | 1 | -15 | 16.53   | 1.39  |
| 2 | 1 | -14 | 64.18   | 3.16  |
| 2 | 1 | -14 | 57.31   | 2.77  |
| 2 | 1 | -13 | 74.97   | 3.69  |
| 2 | 1 | -13 | 68.07   | 4.26  |
| 2 | 1 | -12 | 183.61  | 6.68  |
| 2 | 1 | -12 | 202.93  | 5.87  |
| 2 | 1 | -12 | 207.87  | 6.18  |
| 2 | 1 | -12 | 178.48  | 6.89  |
| 2 | 1 | -11 | 31.87   | 2.53  |
| 2 | 1 | -11 | 29.08   | 2.92  |
| 2 | 1 | -11 | 31.65   | 2.38  |
| 2 | 1 | -11 | 32.44   | 2.49  |
| 2 | 1 | -11 | 30.70   | 2.86  |
| 2 | 1 | -10 | 7.89    | 1.41  |
| 2 | 1 | -10 | 8.70    | 1.40  |
| 2 | 1 | -10 | 10.85   | 1.50  |



## CIF 31

|   |   |     |        |      |
|---|---|-----|--------|------|
| 2 | 1 | -10 | 8.62   | 1.69 |
| 2 | 1 | -10 | 7.72   | 1.67 |
| 2 | 1 | -10 | 8.28   | 1.49 |
| 2 | 1 | -10 | 9.54   | 1.37 |
| 2 | 1 | -9  | 265.08 | 5.75 |
| 2 | 1 | -9  | 259.30 | 6.94 |
| 2 | 1 | -9  | 266.52 | 6.58 |
| 2 | 1 | -9  | 264.83 | 6.38 |
| 2 | 1 | -9  | 281.03 | 6.34 |
| 2 | 1 | -9  | 261.07 | 6.55 |
| 2 | 1 | -9  | 263.17 | 5.76 |
| 2 | 1 | -8  | 118.34 | 3.49 |
| 2 | 1 | -8  | 101.44 | 3.24 |
| 2 | 1 | -8  | 103.47 | 3.65 |
| 2 | 1 | -8  | 103.90 | 3.49 |
| 2 | 1 | -8  | 97.58  | 3.86 |
| 2 | 1 | -8  | 95.74  | 3.76 |
| 2 | 1 | -8  | 96.31  | 3.66 |
| 2 | 1 | -8  | 115.29 | 3.39 |
| 2 | 1 | -7  | 185.89 | 3.44 |
| 2 | 1 | -7  | 153.88 | 4.28 |
| 2 | 1 | -7  | 158.47 | 3.86 |
| 2 | 1 | -7  | 167.80 | 3.99 |
| 2 | 1 | -7  | 176.06 | 4.71 |
| 2 | 1 | -7  | 171.13 | 4.15 |
| 2 | 1 | -7  | 156.90 | 4.15 |
| 2 | 1 | -7  | 174.73 | 4.66 |
| 2 | 1 | -7  | 167.16 | 4.39 |
| 2 | 1 | -7  | 168.26 | 3.75 |
| 2 | 1 | -7  | 156.41 | 2.94 |
| 2 | 1 | -6  | 24.63  | 1.46 |
| 2 | 1 | -6  | 23.41  | 1.42 |
| 2 | 1 | -6  | 29.05  | 1.16 |
| 2 | 1 | -6  | 24.50  | 1.06 |
| 2 | 1 | -6  | 23.52  | 1.55 |
| 2 | 1 | -6  | 26.10  | 1.27 |
| 2 | 1 | -6  | 25.82  | 1.55 |
| 2 | 1 | -6  | 27.39  | 1.64 |
| 2 | 1 | -6  | 26.62  | 0.96 |
| 2 | 1 | -6  | 24.12  | 1.33 |
| 2 | 1 | -6  | 24.72  | 1.02 |

## CIF 31

|   |   |    |         |       |
|---|---|----|---------|-------|
| 2 | 1 | -5 | 4597.19 | 40.10 |
| 2 | 1 | -5 | 4819.90 | 40.67 |
| 2 | 1 | -5 | 4327.08 | 38.82 |
| 2 | 1 | -5 | 4739.41 | 41.06 |
| 2 | 1 | -5 | 4967.64 | 41.04 |
| 2 | 1 | -5 | 4525.35 | 39.90 |
| 2 | 1 | -5 | 4996.94 | 41.12 |
| 2 | 1 | -5 | 4777.75 | 41.21 |
| 2 | 1 | -5 | 4394.71 | 38.83 |
| 2 | 1 | -5 | 4285.58 | 40.05 |
| 2 | 1 | -4 | 1358.76 | 12.71 |
| 2 | 1 | -4 | 1335.01 | 13.11 |
| 2 | 1 | -4 | 1127.90 | 11.99 |
| 2 | 1 | -4 | 1077.40 | 11.15 |
| 2 | 1 | -4 | 1283.88 | 12.29 |
| 2 | 1 | -4 | 1108.97 | 12.13 |
| 2 | 1 | -4 | 1167.51 | 12.67 |
| 2 | 1 | -4 | 1271.78 | 12.52 |
| 2 | 1 | -4 | 1157.64 | 12.58 |
| 2 | 1 | -4 | 1168.70 | 11.52 |
| 2 | 1 | -4 | 1180.52 | 12.29 |
| 2 | 1 | -3 | 5965.51 | 55.93 |
| 2 | 1 | -3 | 6298.47 | 55.35 |
| 2 | 1 | -2 | 93.61   | 1.84  |
| 2 | 1 | -2 | 81.10   | 1.46  |
| 2 | 1 | -2 | 87.66   | 2.07  |
| 2 | 1 | -2 | 92.80   | 2.00  |
| 2 | 1 | -2 | 79.71   | 1.80  |
| 2 | 1 | -2 | 74.33   | 1.67  |
| 2 | 1 | -2 | 90.96   | 1.69  |
| 2 | 1 | -2 | 73.33   | 1.33  |
| 2 | 1 | -1 | 88.14   | 1.60  |
| 2 | 1 | -1 | 86.23   | 1.65  |
| 2 | 1 | -1 | 88.51   | 1.34  |
| 2 | 1 | -1 | 89.11   | 1.76  |
| 2 | 1 | 0  | 49.15   | 1.09  |
| 2 | 1 | 0  | 55.08   | 1.40  |
| 2 | 1 | 0  | 53.04   | 1.02  |
| 2 | 1 | 0  | 49.56   | 1.46  |
| 2 | 1 | 0  | 51.34   | 0.96  |
| 2 | 1 | 1  | 406.13  | 5.01  |

## CIF 31

|   |   |     |         |       |
|---|---|-----|---------|-------|
| 2 | 1 | 1   | 365.48  | 4.73  |
| 2 | 1 | 1   | 389.78  | 4.67  |
| 2 | 1 | 1   | 348.34  | 4.12  |
| 2 | 1 | 2   | 6469.00 | 54.20 |
| 2 | 1 | 2   | 6485.70 | 54.05 |
| 2 | 1 | 3   | 1638.15 | 15.55 |
| 2 | 1 | 3   | 1663.75 | 15.84 |
| 2 | 1 | 3   | 1656.87 | 16.08 |
| 2 | 1 | 4   | 5343.51 | 42.71 |
| 2 | 1 | 4   | 5300.32 | 43.99 |
| 2 | 1 | 5   | 170.37  | 3.40  |
| 2 | 1 | 5   | 173.36  | 3.74  |
| 2 | 1 | 6   | 254.73  | 4.68  |
| 2 | 1 | 6   | 267.58  | 4.92  |
| 2 | 1 | 7   | 905.38  | 11.65 |
| 2 | 1 | 7   | 945.34  | 12.37 |
| 2 | 1 | 8   | 49.81   | 2.51  |
| 2 | 1 | 9   | 18.22   | 1.49  |
| 2 | 1 | 10  | 350.60  | 7.86  |
| 2 | 1 | 10  | 364.35  | 6.70  |
| 2 | 1 | 11  | 24.46   | 1.99  |
| 2 | 2 | -16 | 7.62    | 0.71  |
| 2 | 2 | -16 | 7.26    | 0.75  |
| 2 | 2 | -15 | 26.50   | 1.86  |
| 2 | 2 | -14 | 4.51    | 1.27  |
| 2 | 2 | -13 | 195.95  | 6.91  |
| 2 | 2 | -13 | 196.39  | 6.12  |
| 2 | 2 | -13 | 196.24  | 5.68  |
| 2 | 2 | -12 | 202.12  | 7.33  |
| 2 | 2 | -12 | 218.65  | 6.78  |
| 2 | 2 | -12 | 203.21  | 6.17  |
| 2 | 2 | -12 | 202.59  | 6.35  |
| 2 | 2 | -11 | 27.48   | 2.33  |
| 2 | 2 | -11 | 27.14   | 2.83  |
| 2 | 2 | -11 | 29.58   | 2.64  |
| 2 | 2 | -11 | 27.42   | 2.45  |
| 2 | 2 | -11 | 24.66   | 2.39  |
| 2 | 2 | -11 | 28.16   | 2.21  |
| 2 | 2 | -10 | 2410.30 | 26.72 |
| 2 | 2 | -10 | 2565.05 | 29.97 |
| 2 | 2 | -10 | 2443.23 | 28.79 |

## CIF 31

|   |   |     |         |       |
|---|---|-----|---------|-------|
| 2 | 2 | -10 | 2430.54 | 27.90 |
| 2 | 2 | -10 | 2365.41 | 27.25 |
| 2 | 2 | -10 | 2215.52 | 29.28 |
| 2 | 2 | -10 | 2522.32 | 27.43 |
| 2 | 2 | -10 | 2425.06 | 28.78 |
| 2 | 2 | -10 | 2619.55 | 26.62 |
| 2 | 2 | -9  | 65.02   | 2.85  |
| 2 | 2 | -9  | 72.14   | 3.17  |
| 2 | 2 | -9  | 80.35   | 3.74  |
| 2 | 2 | -9  | 68.62   | 3.46  |
| 2 | 2 | -9  | 85.45   | 3.49  |
| 2 | 2 | -9  | 80.77   | 3.64  |
| 2 | 2 | -9  | 75.21   | 3.35  |
| 2 | 2 | -9  | 72.93   | 3.74  |
| 2 | 2 | -9  | 72.72   | 3.65  |
| 2 | 2 | -9  | 75.27   | 2.99  |
| 2 | 2 | -9  | 70.16   | 2.93  |
| 2 | 2 | -9  | 75.94   | 3.88  |
| 2 | 2 | -8  | 1832.74 | 19.30 |
| 2 | 2 | -8  | 1724.03 | 19.91 |
| 2 | 2 | -8  | 1845.96 | 21.26 |
| 2 | 2 | -8  | 1687.55 | 19.84 |
| 2 | 2 | -8  | 1793.31 | 20.31 |
| 2 | 2 | -8  | 1755.32 | 21.45 |
| 2 | 2 | -8  | 1594.36 | 20.78 |
| 2 | 2 | -8  | 1949.46 | 20.13 |
| 2 | 2 | -8  | 1661.54 | 20.64 |
| 2 | 2 | -8  | 1758.24 | 19.45 |
| 2 | 2 | -7  | 7622.04 | 68.26 |
| 2 | 2 | -7  | 7834.43 | 69.36 |
| 2 | 2 | -7  | 8496.88 | 69.55 |
| 2 | 2 | -7  | 8022.19 | 70.49 |
| 2 | 2 | -7  | 7579.70 | 69.52 |
| 2 | 2 | -7  | 7879.66 | 68.24 |
| 2 | 2 | -7  | 8100.64 | 69.83 |
| 2 | 2 | -7  | 8056.63 | 69.02 |
| 2 | 2 | -7  | 7189.64 | 69.69 |
| 2 | 2 | -7  | 8450.61 | 70.81 |
| 2 | 2 | -7  | 7911.58 | 68.84 |
| 2 | 2 | -6  | 5670.31 | 54.85 |
| 2 | 2 | -6  | 6388.85 | 53.78 |

## CIF 31

|   |   |    |         |       |
|---|---|----|---------|-------|
| 2 | 2 | -6 | 6405.87 | 54.75 |
| 2 | 2 | -6 | 6099.41 | 51.45 |
| 2 | 2 | -6 | 5634.01 | 51.21 |
| 2 | 2 | -6 | 6524.17 | 54.14 |
| 2 | 2 | -6 | 6217.30 | 53.18 |
| 2 | 2 | -6 | 6638.96 | 54.39 |
| 2 | 2 | -6 | 6527.45 | 55.23 |
| 2 | 2 | -6 | 6283.32 | 55.19 |
| 2 | 2 | -6 | 6281.14 | 52.27 |
| 2 | 2 | -6 | 6409.38 | 54.45 |
| 2 | 2 | -5 | 516.89  | 7.36  |
| 2 | 2 | -5 | 522.10  | 7.51  |
| 2 | 2 | -5 | 450.65  | 6.66  |
| 2 | 2 | -5 | 446.81  | 5.59  |
| 2 | 2 | -5 | 602.75  | 5.47  |
| 2 | 2 | -5 | 572.38  | 7.54  |
| 2 | 2 | -5 | 457.26  | 6.67  |
| 2 | 2 | -5 | 545.30  | 7.60  |
| 2 | 2 | -5 | 482.78  | 7.06  |
| 2 | 2 | -5 | 497.08  | 6.30  |
| 2 | 2 | -5 | 549.21  | 7.51  |
| 2 | 2 | -4 | 4260.71 | 39.02 |
| 2 | 2 | -4 | 4734.14 | 40.10 |
| 2 | 2 | -4 | 4604.80 | 38.91 |
| 2 | 2 | -4 | 4302.10 | 37.63 |
| 2 | 2 | -4 | 4305.36 | 38.95 |
| 2 | 2 | -4 | 4311.31 | 39.91 |
| 2 | 2 | -4 | 4511.37 | 39.77 |
| 2 | 2 | -4 | 4428.07 | 39.23 |
| 2 | 2 | -4 | 4290.50 | 38.90 |
| 2 | 2 | -4 | 4622.86 | 39.80 |
| 2 | 2 | -4 | 4617.63 | 38.60 |
| 2 | 2 | -4 | 4695.65 | 39.80 |
| 2 | 2 | -3 | 1.17    | 0.41  |
| 2 | 2 | -3 | 4.68    | 0.67  |
| 2 | 2 | -3 | 5.71    | 0.57  |
| 2 | 2 | -3 | 5.32    | 0.73  |
| 2 | 2 | -3 | 1.21    | 0.58  |
| 2 | 2 | -3 | 1.43    | 0.42  |
| 2 | 2 | -3 | 7.25    | 0.76  |
| 2 | 2 | -3 | 3.00    | 0.61  |

## CIF 31

|   |   |    |         |       |
|---|---|----|---------|-------|
| 2 | 2 | -3 | 1.46    | 0.48  |
| 2 | 2 | -3 | 2.41    | 0.53  |
| 2 | 2 | -3 | 0.63    | 0.52  |
| 2 | 2 | -3 | 1.48    | 0.33  |
| 2 | 2 | -2 | 487.25  | 5.45  |
| 2 | 2 | -2 | 461.26  | 7.16  |
| 2 | 2 | -2 | 532.58  | 5.99  |
| 2 | 2 | -2 | 423.52  | 5.16  |
| 2 | 2 | -2 | 523.72  | 6.18  |
| 2 | 2 | -2 | 518.48  | 6.19  |
| 2 | 2 | -2 | 393.77  | 6.11  |
| 2 | 2 | -2 | 450.05  | 5.69  |
| 2 | 2 | -1 | 6.03    | 0.89  |
| 2 | 2 | -1 | 4.81    | 0.45  |
| 2 | 2 | -1 | 4.28    | 0.59  |
| 2 | 2 | 0  | 636.39  | 8.37  |
| 2 | 2 | 0  | 710.98  | 7.30  |
| 2 | 2 | 0  | 676.45  | 6.89  |
| 2 | 2 | 0  | 706.49  | 7.40  |
| 2 | 2 | 0  | 660.37  | 7.71  |
| 2 | 2 | 0  | 651.84  | 6.01  |
| 2 | 2 | 1  | 849.60  | 8.83  |
| 2 | 2 | 1  | 942.99  | 9.92  |
| 2 | 2 | 1  | 908.12  | 9.16  |
| 2 | 2 | 1  | 772.63  | 8.22  |
| 2 | 2 | 1  | 814.20  | 9.02  |
| 2 | 2 | 1  | 770.89  | 7.58  |
| 2 | 2 | 2  | 3237.96 | 26.95 |
| 2 | 2 | 2  | 2940.74 | 25.38 |
| 2 | 2 | 2  | 2999.17 | 26.35 |
| 2 | 2 | 2  | 2868.61 | 25.80 |
| 2 | 2 | 2  | 2822.56 | 24.66 |
| 2 | 2 | 2  | 2591.26 | 24.13 |
| 2 | 2 | 2  | 2807.54 | 25.46 |
| 2 | 2 | 3  | 3060.22 | 27.70 |
| 2 | 2 | 3  | 3143.03 | 27.33 |
| 2 | 2 | 3  | 3117.95 | 27.00 |
| 2 | 2 | 4  | 6.56    | 0.63  |
| 2 | 2 | 4  | 5.88    | 0.56  |
| 2 | 2 | 4  | 6.09    | 0.73  |
| 2 | 2 | 5  | 1069.36 | 11.29 |

## CIF 31

|   |   |     |         |       |
|---|---|-----|---------|-------|
| 2 | 2 | 5   | 1071.58 | 12.22 |
| 2 | 2 | 6   | 215.49  | 4.37  |
| 2 | 2 | 6   | 230.91  | 5.05  |
| 2 | 2 | 7   | 1154.35 | 13.64 |
| 2 | 2 | 8   | 185.51  | 4.47  |
| 2 | 2 | 9   | 568.20  | 8.97  |
| 2 | 2 | 10  | 673.82  | 9.59  |
| 2 | 2 | 10  | 595.78  | 10.90 |
| 2 | 3 | -16 | 241.50  | 3.73  |
| 2 | 3 | -15 | 290.54  | 6.17  |
| 2 | 3 | -14 | 11.64   | 1.64  |
| 2 | 3 | -14 | 11.74   | 1.45  |
| 2 | 3 | -14 | 10.45   | 1.58  |
| 2 | 3 | -13 | 17.01   | 2.45  |
| 2 | 3 | -13 | 20.69   | 2.31  |
| 2 | 3 | -13 | 19.13   | 2.05  |
| 2 | 3 | -13 | 17.25   | 2.13  |
| 2 | 3 | -13 | 14.39   | 1.70  |
| 2 | 3 | -12 | 494.52  | 10.99 |
| 2 | 3 | -12 | 529.15  | 10.65 |
| 2 | 3 | -12 | 484.52  | 10.29 |
| 2 | 3 | -12 | 492.85  | 9.91  |
| 2 | 3 | -12 | 454.64  | 11.47 |
| 2 | 3 | -12 | 479.42  | 11.77 |
| 2 | 3 | -12 | 495.62  | 9.27  |
| 2 | 3 | -11 | 59.38   | 3.73  |
| 2 | 3 | -11 | 64.70   | 3.65  |
| 2 | 3 | -11 | 59.00   | 3.44  |
| 2 | 3 | -11 | 61.41   | 4.06  |
| 2 | 3 | -11 | 58.82   | 3.40  |
| 2 | 3 | -11 | 58.72   | 3.77  |
| 2 | 3 | -11 | 56.43   | 3.02  |
| 2 | 3 | -10 | 124.89  | 4.62  |
| 2 | 3 | -10 | 107.52  | 4.81  |
| 2 | 3 | -10 | 108.31  | 4.60  |
| 2 | 3 | -10 | 114.02  | 4.50  |
| 2 | 3 | -10 | 121.99  | 4.84  |
| 2 | 3 | -10 | 116.65  | 4.64  |
| 2 | 3 | -10 | 107.16  | 5.01  |
| 2 | 3 | -10 | 114.50  | 5.02  |
| 2 | 3 | -10 | 113.88  | 4.17  |

## CIF 31

|   |   |    |        |      |
|---|---|----|--------|------|
| 2 | 3 | -9 | 351.87 | 6.80 |
| 2 | 3 | -9 | 351.29 | 7.78 |
| 2 | 3 | -9 | 371.03 | 8.54 |
| 2 | 3 | -9 | 330.85 | 8.16 |
| 2 | 3 | -9 | 365.25 | 7.81 |
| 2 | 3 | -9 | 373.84 | 8.55 |
| 2 | 3 | -9 | 335.31 | 7.76 |
| 2 | 3 | -9 | 358.31 | 8.59 |
| 2 | 3 | -9 | 349.17 | 6.92 |
| 2 | 3 | -9 | 361.61 | 8.54 |
| 2 | 3 | -9 | 348.07 | 7.41 |
| 2 | 3 | -8 | 154.23 | 4.11 |
| 2 | 3 | -8 | 155.89 | 4.76 |
| 2 | 3 | -8 | 153.82 | 5.21 |
| 2 | 3 | -8 | 161.03 | 4.76 |
| 2 | 3 | -8 | 163.40 | 5.30 |
| 2 | 3 | -8 | 160.89 | 4.89 |
| 2 | 3 | -8 | 157.49 | 5.16 |
| 2 | 3 | -8 | 153.26 | 4.29 |
| 2 | 3 | -8 | 176.37 | 4.69 |
| 2 | 3 | -8 | 150.37 | 5.10 |
| 2 | 3 | -8 | 144.74 | 4.50 |
| 2 | 3 | -7 | 168.24 | 4.12 |
| 2 | 3 | -7 | 222.87 | 5.97 |
| 2 | 3 | -7 | 171.93 | 4.85 |
| 2 | 3 | -7 | 210.11 | 5.08 |
| 2 | 3 | -7 | 191.21 | 5.12 |
| 2 | 3 | -7 | 161.27 | 4.78 |
| 2 | 3 | -7 | 199.91 | 5.36 |
| 2 | 3 | -7 | 182.09 | 4.55 |
| 2 | 3 | -7 | 174.74 | 4.11 |
| 2 | 3 | -7 | 198.88 | 4.70 |
| 2 | 3 | -7 | 181.02 | 4.75 |
| 2 | 3 | -6 | 236.76 | 4.62 |
| 2 | 3 | -6 | 245.20 | 5.40 |
| 2 | 3 | -6 | 233.39 | 5.46 |
| 2 | 3 | -6 | 263.01 | 5.47 |
| 2 | 3 | -6 | 213.87 | 5.01 |
| 2 | 3 | -6 | 234.65 | 5.44 |
| 2 | 3 | -6 | 257.41 | 5.32 |
| 2 | 3 | -6 | 242.86 | 4.90 |



## CIF 31

|   |   |    |         |       |
|---|---|----|---------|-------|
| 2 | 3 | -6 | 263.40  | 6.28  |
| 2 | 3 | -6 | 266.29  | 5.15  |
| 2 | 3 | -6 | 246.02  | 5.53  |
| 2 | 3 | -6 | 245.80  | 4.26  |
| 2 | 3 | -6 | 225.12  | 5.12  |
| 2 | 3 | -5 | 1958.43 | 20.15 |
| 2 | 3 | -5 | 1900.72 | 20.62 |
| 2 | 3 | -5 | 1944.98 | 19.53 |
| 2 | 3 | -5 | 1941.51 | 17.81 |
| 2 | 3 | -5 | 2053.52 | 20.93 |
| 2 | 3 | -5 | 1888.16 | 20.20 |
| 2 | 3 | -5 | 2057.42 | 20.16 |
| 2 | 3 | -5 | 2063.85 | 20.98 |
| 2 | 3 | -5 | 1986.75 | 19.33 |
| 2 | 3 | -5 | 1994.96 | 19.99 |
| 2 | 3 | -5 | 2192.55 | 21.15 |
| 2 | 3 | -5 | 1936.52 | 18.81 |
| 2 | 3 | -4 | 1108.02 | 11.98 |
| 2 | 3 | -4 | 1121.13 | 11.98 |
| 2 | 3 | -4 | 943.21  | 11.33 |
| 2 | 3 | -4 | 1185.26 | 13.22 |
| 2 | 3 | -4 | 1122.57 | 12.78 |
| 2 | 3 | -4 | 1065.98 | 12.99 |
| 2 | 3 | -4 | 1027.99 | 11.95 |
| 2 | 3 | -4 | 1035.81 | 12.44 |
| 2 | 3 | -4 | 1096.91 | 11.86 |
| 2 | 3 | -4 | 1135.98 | 12.02 |
| 2 | 3 | -4 | 1108.04 | 12.83 |
| 2 | 3 | -4 | 1086.38 | 10.09 |
| 2 | 3 | -3 | 442.25  | 5.78  |
| 2 | 3 | -3 | 476.02  | 7.02  |
| 2 | 3 | -3 | 414.84  | 5.94  |
| 2 | 3 | -3 | 453.33  | 5.81  |
| 2 | 3 | -3 | 461.57  | 6.98  |
| 2 | 3 | -3 | 441.99  | 7.09  |
| 2 | 3 | -3 | 452.07  | 6.40  |
| 2 | 3 | -3 | 455.21  | 6.30  |
| 2 | 3 | -3 | 418.69  | 6.06  |
| 2 | 3 | -3 | 413.08  | 5.73  |
| 2 | 3 | -3 | 428.35  | 6.13  |
| 2 | 3 | -2 | 951.25  | 11.19 |

## CIF 31

|   |   |    |         |       |
|---|---|----|---------|-------|
| 2 | 3 | -2 | 874.04  | 9.97  |
| 2 | 3 | -2 | 885.49  | 9.51  |
| 2 | 3 | -2 | 948.37  | 11.37 |
| 2 | 3 | -2 | 967.04  | 10.18 |
| 2 | 3 | -2 | 825.09  | 10.09 |
| 2 | 3 | -2 | 949.47  | 9.51  |
| 2 | 3 | -2 | 913.88  | 10.19 |
| 2 | 3 | -2 | 1010.25 | 11.20 |
| 2 | 3 | -2 | 832.75  | 9.90  |
| 2 | 3 | -1 | 414.59  | 6.75  |
| 2 | 3 | -1 | 394.68  | 5.28  |
| 2 | 3 | -1 | 455.01  | 6.00  |
| 2 | 3 | -1 | 431.02  | 5.46  |
| 2 | 3 | -1 | 430.13  | 6.14  |
| 2 | 3 | -1 | 436.74  | 6.48  |
| 2 | 3 | -1 | 429.95  | 4.40  |
| 2 | 3 | 0  | 71.33   | 1.85  |
| 2 | 3 | 0  | 69.93   | 2.08  |
| 2 | 3 | 0  | 72.26   | 2.19  |
| 2 | 3 | 0  | 67.22   | 2.23  |
| 2 | 3 | 0  | 70.16   | 1.32  |
| 2 | 3 | 1  | 12.84   | 1.13  |
| 2 | 3 | 1  | 14.79   | 0.92  |
| 2 | 3 | 1  | 15.51   | 1.05  |
| 2 | 3 | 1  | 14.25   | 1.03  |
| 2 | 3 | 1  | 16.62   | 1.14  |
| 2 | 3 | 1  | 13.42   | 0.65  |
| 2 | 3 | 2  | 157.69  | 3.15  |
| 2 | 3 | 2  | 160.19  | 3.37  |
| 2 | 3 | 2  | 149.93  | 2.59  |
| 2 | 3 | 2  | 157.27  | 3.42  |
| 2 | 3 | 3  | 1040.62 | 11.60 |
| 2 | 3 | 3  | 1041.78 | 10.87 |
| 2 | 3 | 4  | 203.50  | 4.19  |
| 2 | 3 | 4  | 204.13  | 3.74  |
| 2 | 3 | 5  | 270.95  | 5.30  |
| 2 | 3 | 5  | 281.81  | 5.90  |
| 2 | 3 | 6  | 750.07  | 10.22 |
| 2 | 3 | 6  | 750.54  | 10.88 |
| 2 | 3 | 6  | 616.84  | 10.66 |
| 2 | 3 | 6  | 649.03  | 8.99  |

## CIF 31

|   |   |     |        |      |
|---|---|-----|--------|------|
| 2 | 3 | 7   | 219.59 | 5.17 |
| 2 | 3 | 7   | 231.57 | 5.76 |
| 2 | 3 | 8   | 171.35 | 4.53 |
| 2 | 3 | 8   | 133.98 | 4.86 |
| 2 | 3 | 9   | 239.28 | 5.36 |
| 2 | 3 | 9   | 262.38 | 5.78 |
| 2 | 3 | 10  | 20.04  | 1.90 |
| 2 | 4 | -16 | 1.11   | 0.39 |
| 2 | 4 | -15 | 97.26  | 3.41 |
| 2 | 4 | -15 | 116.88 | 3.26 |
| 2 | 4 | -14 | 90.34  | 4.11 |
| 2 | 4 | -14 | 90.67  | 3.62 |
| 2 | 4 | -14 | 91.13  | 3.83 |
| 2 | 4 | -13 | 316.98 | 8.61 |
| 2 | 4 | -13 | 311.03 | 7.71 |
| 2 | 4 | -13 | 306.35 | 7.80 |
| 2 | 4 | -13 | 298.37 | 7.39 |
| 2 | 4 | -13 | 308.69 | 8.94 |
| 2 | 4 | -13 | 317.74 | 6.95 |
| 2 | 4 | -12 | 3.14   | 1.53 |
| 2 | 4 | -12 | 4.73   | 1.54 |
| 2 | 4 | -12 | 2.98   | 1.32 |
| 2 | 4 | -12 | 4.08   | 1.35 |
| 2 | 4 | -11 | 3.41   | 1.56 |
| 2 | 4 | -11 | 4.08   | 1.48 |
| 2 | 4 | -11 | 2.59   | 1.31 |
| 2 | 4 | -11 | 3.51   | 1.48 |
| 2 | 4 | -11 | 3.23   | 1.43 |
| 2 | 4 | -11 | 4.38   | 1.76 |
| 2 | 4 | -11 | 3.79   | 1.11 |
| 2 | 4 | -11 | 4.36   | 1.24 |
| 2 | 4 | -10 | 194.60 | 5.01 |
| 2 | 4 | -10 | 179.29 | 6.03 |
| 2 | 4 | -10 | 185.04 | 6.53 |
| 2 | 4 | -10 | 168.53 | 6.10 |
| 2 | 4 | -10 | 186.05 | 5.99 |
| 2 | 4 | -10 | 172.59 | 6.13 |
| 2 | 4 | -10 | 173.88 | 6.45 |
| 2 | 4 | -10 | 182.64 | 4.26 |
| 2 | 4 | -10 | 175.40 | 5.23 |
| 2 | 4 | -10 | 164.78 | 6.40 |

## CIF 31

|   |   |     |         |       |
|---|---|-----|---------|-------|
| 2 | 4 | -10 | 175.91  | 6.38  |
| 2 | 4 | -10 | 174.94  | 5.65  |
| 2 | 4 | -10 | 184.24  | 6.10  |
| 2 | 4 | -9  | 4267.66 | 40.01 |
| 2 | 4 | -9  | 4199.07 | 43.08 |
| 2 | 4 | -9  | 4823.68 | 45.46 |
| 2 | 4 | -9  | 4543.23 | 44.73 |
| 2 | 4 | -9  | 4241.63 | 42.63 |
| 2 | 4 | -9  | 4402.81 | 44.60 |
| 2 | 4 | -9  | 4475.74 | 43.61 |
| 2 | 4 | -9  | 3761.98 | 42.96 |
| 2 | 4 | -9  | 3773.64 | 37.93 |
| 2 | 4 | -9  | 4244.27 | 41.44 |
| 2 | 4 | -9  | 4395.22 | 41.46 |
| 2 | 4 | -9  | 3953.73 | 42.38 |
| 2 | 4 | -8  | 1245.50 | 15.26 |
| 2 | 4 | -8  | 1246.97 | 14.96 |
| 2 | 4 | -8  | 1208.87 | 16.64 |
| 2 | 4 | -8  | 1112.52 | 15.91 |
| 2 | 4 | -8  | 1505.70 | 19.42 |
| 2 | 4 | -8  | 1272.83 | 17.71 |
| 2 | 4 | -8  | 1188.27 | 15.24 |
| 2 | 4 | -8  | 1227.39 | 17.06 |
| 2 | 4 | -8  | 1114.30 | 16.64 |
| 2 | 4 | -8  | 1151.56 | 15.85 |
| 2 | 4 | -8  | 1326.31 | 15.92 |
| 2 | 4 | -8  | 955.07  | 16.19 |
| 2 | 4 | -8  | 1279.45 | 16.92 |
| 2 | 4 | -7  | 133.53  | 4.09  |
| 2 | 4 | -7  | 121.37  | 3.55  |
| 2 | 4 | -7  | 140.42  | 4.62  |
| 2 | 4 | -7  | 154.50  | 4.86  |
| 2 | 4 | -7  | 131.15  | 4.30  |
| 2 | 4 | -7  | 155.77  | 5.38  |
| 2 | 4 | -7  | 115.03  | 3.85  |
| 2 | 4 | -7  | 121.83  | 3.87  |
| 2 | 4 | -7  | 135.74  | 4.56  |
| 2 | 4 | -7  | 117.05  | 4.21  |
| 2 | 4 | -7  | 130.11  | 4.24  |
| 2 | 4 | -7  | 121.13  | 3.84  |
| 2 | 4 | -7  | 122.92  | 3.85  |

## CIF 31

|   |   |    |         |       |
|---|---|----|---------|-------|
| 2 | 4 | -7 | 125.82  | 4.52  |
| 2 | 4 | -7 | 151.15  | 4.70  |
| 2 | 4 | -6 | 10.25   | 1.22  |
| 2 | 4 | -6 | 12.28   | 1.64  |
| 2 | 4 | -6 | 8.45    | 1.04  |
| 2 | 4 | -6 | 9.72    | 1.09  |
| 2 | 4 | -6 | 9.89    | 1.22  |
| 2 | 4 | -6 | 16.20   | 1.56  |
| 2 | 4 | -6 | 10.43   | 1.30  |
| 2 | 4 | -6 | 13.14   | 1.43  |
| 2 | 4 | -6 | 9.11    | 1.17  |
| 2 | 4 | -6 | 10.73   | 1.26  |
| 2 | 4 | -6 | 12.05   | 1.41  |
| 2 | 4 | -6 | 10.21   | 0.97  |
| 2 | 4 | -6 | 10.02   | 1.27  |
| 2 | 4 | -6 | 17.52   | 1.66  |
| 2 | 4 | -5 | 1899.88 | 20.72 |
| 2 | 4 | -5 | 1811.69 | 19.27 |
| 2 | 4 | -5 | 1877.49 | 20.64 |
| 2 | 4 | -5 | 1928.63 | 17.50 |
| 2 | 4 | -5 | 1953.80 | 19.59 |
| 2 | 4 | -5 | 2159.01 | 23.69 |
| 2 | 4 | -5 | 1896.64 | 20.78 |
| 2 | 4 | -5 | 1886.23 | 21.22 |
| 2 | 4 | -5 | 1878.28 | 21.16 |
| 2 | 4 | -5 | 1824.43 | 20.62 |
| 2 | 4 | -5 | 1842.95 | 19.83 |
| 2 | 4 | -5 | 2055.42 | 21.19 |
| 2 | 4 | -5 | 1810.46 | 19.36 |
| 2 | 4 | -5 | 1906.65 | 19.81 |
| 2 | 4 | -5 | 2019.76 | 21.46 |
| 2 | 4 | -5 | 1872.45 | 19.38 |
| 2 | 4 | -4 | 11.19   | 1.20  |
| 2 | 4 | -4 | 10.02   | 1.01  |
| 2 | 4 | -4 | 10.42   | 1.05  |
| 2 | 4 | -4 | 13.89   | 1.41  |
| 2 | 4 | -4 | 15.27   | 1.52  |
| 2 | 4 | -4 | 11.23   | 1.29  |
| 2 | 4 | -4 | 9.93    | 1.10  |
| 2 | 4 | -4 | 14.58   | 1.25  |
| 2 | 4 | -4 | 11.01   | 1.02  |

## CIF 31

|   |   |    |         |       |
|---|---|----|---------|-------|
| 2 | 4 | -4 | 10.80   | 1.03  |
| 2 | 4 | -4 | 9.65    | 0.63  |
| 2 | 4 | -3 | 2.01    | 0.63  |
| 2 | 4 | -3 | 1.36    | 0.78  |
| 2 | 4 | -3 | 2.07    | 0.69  |
| 2 | 4 | -3 | 3.21    | 0.69  |
| 2 | 4 | -3 | 2.07    | 0.63  |
| 2 | 4 | -3 | 2.87    | 0.83  |
| 2 | 4 | -3 | 1.60    | 0.56  |
| 2 | 4 | -3 | 1.07    | 0.68  |
| 2 | 4 | -2 | 5.55    | 0.90  |
| 2 | 4 | -2 | 4.83    | 0.80  |
| 2 | 4 | -2 | 7.54    | 0.82  |
| 2 | 4 | -2 | 4.17    | 0.84  |
| 2 | 4 | -2 | 5.18    | 0.82  |
| 2 | 4 | -2 | 4.78    | 0.97  |
| 2 | 4 | -2 | 4.50    | 0.65  |
| 2 | 4 | -2 | 3.18    | 0.54  |
| 2 | 4 | -2 | 5.25    | 0.90  |
| 2 | 4 | -2 | 5.09    | 0.90  |
| 2 | 4 | -1 | 585.09  | 8.19  |
| 2 | 4 | -1 | 557.77  | 7.81  |
| 2 | 4 | -1 | 556.18  | 7.24  |
| 2 | 4 | -1 | 614.53  | 8.03  |
| 2 | 4 | -1 | 605.44  | 9.00  |
| 2 | 4 | -1 | 564.66  | 7.97  |
| 2 | 4 | -1 | 500.93  | 6.01  |
| 2 | 4 | -1 | 548.65  | 7.63  |
| 2 | 4 | -1 | 607.33  | 8.44  |
| 2 | 4 | 0  | 371.65  | 5.87  |
| 2 | 4 | 0  | 352.85  | 5.32  |
| 2 | 4 | 0  | 352.94  | 5.80  |
| 2 | 4 | 0  | 359.08  | 6.59  |
| 2 | 4 | 0  | 354.24  | 5.89  |
| 2 | 4 | 0  | 325.43  | 5.75  |
| 2 | 4 | 0  | 306.37  | 5.48  |
| 2 | 4 | 0  | 328.82  | 5.86  |
| 2 | 4 | 1  | 1285.50 | 14.56 |
| 2 | 4 | 1  | 1225.34 | 13.55 |
| 2 | 4 | 1  | 1349.68 | 13.88 |
| 2 | 4 | 1  | 1352.62 | 14.55 |

## CIF 31

|   |   |     |         |       |
|---|---|-----|---------|-------|
| 2 | 4 | 1   | 1268.59 | 15.18 |
| 2 | 4 | 1   | 1298.32 | 14.47 |
| 2 | 4 | 1   | 1208.60 | 14.01 |
| 2 | 4 | 2   | 848.38  | 10.04 |
| 2 | 4 | 2   | 837.35  | 10.48 |
| 2 | 4 | 3   | 6.77    | 0.91  |
| 2 | 4 | 3   | 5.47    | 0.97  |
| 2 | 4 | 4   | 545.29  | 8.15  |
| 2 | 4 | 4   | 539.21  | 8.64  |
| 2 | 4 | 5   | 234.31  | 5.19  |
| 2 | 4 | 5   | 239.16  | 6.52  |
| 2 | 4 | 6   | 4.22    | 0.92  |
| 2 | 4 | 6   | 4.30    | 1.02  |
| 2 | 4 | 6   | 3.14    | 0.94  |
| 2 | 4 | 6   | 3.01    | 1.11  |
| 2 | 4 | 7   | 181.18  | 4.67  |
| 2 | 4 | 7   | 209.50  | 5.28  |
| 2 | 4 | 8   | 275.67  | 5.78  |
| 2 | 4 | 8   | 277.30  | 6.12  |
| 2 | 5 | -15 | 0.97    | 0.83  |
| 2 | 5 | -15 | 0.08    | 0.62  |
| 2 | 5 | -15 | 0.81    | 0.67  |
| 2 | 5 | -14 | 27.96   | 2.44  |
| 2 | 5 | -14 | 29.43   | 2.16  |
| 2 | 5 | -14 | 34.41   | 2.01  |
| 2 | 5 | -13 | 29.78   | 2.77  |
| 2 | 5 | -13 | 28.77   | 2.46  |
| 2 | 5 | -13 | 30.89   | 2.55  |
| 2 | 5 | -13 | 33.28   | 2.20  |
| 2 | 5 | -12 | 555.71  | 12.73 |
| 2 | 5 | -12 | 631.40  | 13.05 |
| 2 | 5 | -12 | 590.86  | 11.91 |
| 2 | 5 | -12 | 616.98  | 12.06 |
| 2 | 5 | -12 | 568.49  | 10.69 |
| 2 | 5 | -12 | 620.55  | 10.28 |
| 2 | 5 | -11 | 66.59   | 4.29  |
| 2 | 5 | -11 | 76.94   | 4.48  |
| 2 | 5 | -11 | 80.63   | 4.31  |
| 2 | 5 | -11 | 73.74   | 4.15  |
| 2 | 5 | -11 | 59.11   | 2.44  |
| 2 | 5 | -11 | 70.33   | 3.76  |

## CIF 31

|   |   |     |        |       |
|---|---|-----|--------|-------|
| 2 | 5 | -10 | 67.00  | 4.09  |
| 2 | 5 | -10 | 58.25  | 2.70  |
| 2 | 5 | -10 | 58.98  | 3.67  |
| 2 | 5 | -10 | 66.78  | 4.20  |
| 2 | 5 | -10 | 68.01  | 3.92  |
| 2 | 5 | -10 | 61.37  | 3.97  |
| 2 | 5 | -10 | 58.40  | 2.45  |
| 2 | 5 | -10 | 66.28  | 3.50  |
| 2 | 5 | -10 | 55.93  | 3.59  |
| 2 | 5 | -9  | 69.43  | 3.24  |
| 2 | 5 | -9  | 74.76  | 3.03  |
| 2 | 5 | -9  | 79.21  | 4.01  |
| 2 | 5 | -9  | 66.07  | 3.91  |
| 2 | 5 | -9  | 62.87  | 4.01  |
| 2 | 5 | -9  | 71.90  | 3.93  |
| 2 | 5 | -9  | 82.38  | 2.81  |
| 2 | 5 | -9  | 68.52  | 3.52  |
| 2 | 5 | -9  | 77.98  | 3.51  |
| 2 | 5 | -9  | 61.50  | 3.84  |
| 2 | 5 | -9  | 70.02  | 3.81  |
| 2 | 5 | -8  | 170.93 | 6.30  |
| 2 | 5 | -8  | 195.77 | 6.26  |
| 2 | 5 | -8  | 161.51 | 4.96  |
| 2 | 5 | -8  | 142.90 | 4.19  |
| 2 | 5 | -8  | 152.59 | 5.46  |
| 2 | 5 | -8  | 169.25 | 5.83  |
| 2 | 5 | -8  | 157.19 | 4.95  |
| 2 | 5 | -8  | 157.72 | 4.90  |
| 2 | 5 | -8  | 174.42 | 5.84  |
| 2 | 5 | -8  | 160.66 | 5.33  |
| 2 | 5 | -8  | 161.57 | 4.84  |
| 2 | 5 | -8  | 164.90 | 5.73  |
| 2 | 5 | -8  | 170.17 | 5.74  |
| 2 | 5 | -7  | 947.49 | 13.54 |
| 2 | 5 | -7  | 866.25 | 11.98 |
| 2 | 5 | -7  | 891.20 | 15.48 |
| 2 | 5 | -7  | 948.72 | 13.33 |
| 2 | 5 | -7  | 923.26 | 12.64 |
| 2 | 5 | -7  | 909.71 | 13.46 |
| 2 | 5 | -7  | 951.80 | 14.19 |
| 2 | 5 | -7  | 935.81 | 13.43 |



## CIF 31

|   |   |    |        |       |
|---|---|----|--------|-------|
| 2 | 5 | -7 | 959.79 | 13.11 |
| 2 | 5 | -7 | 993.71 | 14.77 |
| 2 | 5 | -7 | 856.10 | 13.70 |
| 2 | 5 | -7 | 940.26 | 14.33 |
| 2 | 5 | -6 | 158.48 | 4.79  |
| 2 | 5 | -6 | 144.07 | 4.78  |
| 2 | 5 | -6 | 143.52 | 3.90  |
| 2 | 5 | -6 | 155.99 | 4.74  |
| 2 | 5 | -6 | 141.49 | 5.53  |
| 2 | 5 | -6 | 155.81 | 4.52  |
| 2 | 5 | -6 | 158.18 | 4.75  |
| 2 | 5 | -6 | 130.78 | 4.18  |
| 2 | 5 | -6 | 166.73 | 5.14  |
| 2 | 5 | -6 | 134.68 | 4.67  |
| 2 | 5 | -6 | 154.00 | 4.78  |
| 2 | 5 | -6 | 157.31 | 4.40  |
| 2 | 5 | -6 | 140.97 | 4.66  |
| 2 | 5 | -6 | 146.58 | 4.25  |
| 2 | 5 | -6 | 159.67 | 5.05  |
| 2 | 5 | -5 | 61.65  | 2.96  |
| 2 | 5 | -5 | 58.67  | 2.97  |
| 2 | 5 | -5 | 51.53  | 2.27  |
| 2 | 5 | -5 | 54.34  | 2.40  |
| 2 | 5 | -5 | 49.41  | 2.57  |
| 2 | 5 | -5 | 46.90  | 2.61  |
| 2 | 5 | -5 | 47.91  | 2.68  |
| 2 | 5 | -5 | 48.09  | 2.47  |
| 2 | 5 | -5 | 53.79  | 2.88  |
| 2 | 5 | -5 | 50.57  | 2.74  |
| 2 | 5 | -5 | 50.62  | 2.44  |
| 2 | 5 | -5 | 54.44  | 2.68  |
| 2 | 5 | -5 | 51.83  | 2.36  |
| 2 | 5 | -5 | 52.23  | 2.44  |
| 2 | 5 | -4 | 189.25 | 5.00  |
| 2 | 5 | -4 | 185.61 | 4.29  |
| 2 | 5 | -4 | 177.83 | 4.56  |
| 2 | 5 | -4 | 204.26 | 4.51  |
| 2 | 5 | -4 | 183.67 | 5.91  |
| 2 | 5 | -4 | 214.71 | 5.42  |
| 2 | 5 | -4 | 195.34 | 5.32  |
| 2 | 5 | -4 | 179.70 | 4.48  |

## CIF 31

|   |   |    |        |      |
|---|---|----|--------|------|
| 2 | 5 | -4 | 184.11 | 4.65 |
| 2 | 5 | -4 | 168.86 | 3.99 |
| 2 | 5 | -4 | 194.69 | 5.22 |
| 2 | 5 | -4 | 212.97 | 5.18 |
| 2 | 5 | -3 | 16.94  | 1.49 |
| 2 | 5 | -3 | 10.02  | 1.11 |
| 2 | 5 | -3 | 9.28   | 1.05 |
| 2 | 5 | -3 | 13.61  | 1.41 |
| 2 | 5 | -3 | 14.68  | 1.59 |
| 2 | 5 | -3 | 11.64  | 1.12 |
| 2 | 5 | -3 | 9.42   | 1.16 |
| 2 | 5 | -3 | 9.63   | 0.94 |
| 2 | 5 | -3 | 12.15  | 1.34 |
| 2 | 5 | -2 | 160.17 | 4.17 |
| 2 | 5 | -2 | 151.94 | 3.78 |
| 2 | 5 | -2 | 155.65 | 3.69 |
| 2 | 5 | -2 | 148.38 | 4.19 |
| 2 | 5 | -2 | 156.46 | 4.68 |
| 2 | 5 | -2 | 147.24 | 4.52 |
| 2 | 5 | -2 | 134.06 | 2.93 |
| 2 | 5 | -2 | 147.09 | 3.88 |
| 2 | 5 | -2 | 141.68 | 4.18 |
| 2 | 5 | -1 | 177.80 | 4.27 |
| 2 | 5 | -1 | 184.03 | 4.48 |
| 2 | 5 | -1 | 198.13 | 4.19 |
| 2 | 5 | -1 | 191.45 | 5.21 |
| 2 | 5 | -1 | 191.11 | 5.14 |
| 2 | 5 | -1 | 191.35 | 4.49 |
| 2 | 5 | -1 | 191.39 | 4.75 |
| 2 | 5 | 0  | 382.87 | 6.26 |
| 2 | 5 | 0  | 407.86 | 6.51 |
| 2 | 5 | 0  | 431.46 | 7.13 |
| 2 | 5 | 0  | 405.24 | 7.86 |
| 2 | 5 | 0  | 358.11 | 7.30 |
| 2 | 5 | 0  | 405.98 | 6.93 |
| 2 | 5 | 0  | 345.26 | 6.62 |
| 2 | 5 | 1  | 0.91   | 0.60 |
| 2 | 5 | 1  | 0.87   | 0.77 |
| 2 | 5 | 1  | 0.42   | 0.67 |
| 2 | 5 | 1  | 0.69   | 0.74 |
| 2 | 5 | 1  | 0.64   | 0.70 |

## CIF 31

|   |   |     |         |       |
|---|---|-----|---------|-------|
| 2 | 5 | 1   | 0.56    | 0.81  |
| 2 | 5 | 2   | 30.45   | 1.76  |
| 2 | 5 | 2   | 30.24   | 1.96  |
| 2 | 5 | 2   | 31.99   | 2.02  |
| 2 | 5 | 3   | 1.27    | 0.76  |
| 2 | 5 | 3   | 0.86    | 0.85  |
| 2 | 5 | 3   | 0.71    | 0.73  |
| 2 | 5 | 3   | 0.91    | 0.76  |
| 2 | 5 | 4   | 1879.25 | 20.99 |
| 2 | 5 | 4   | 1748.44 | 19.46 |
| 2 | 5 | 4   | 1560.86 | 20.42 |
| 2 | 5 | 4   | 1816.61 | 20.30 |
| 2 | 5 | 4   | 1669.42 | 22.36 |
| 2 | 5 | 5   | 3.83    | 1.02  |
| 2 | 5 | 5   | 2.19    | 0.91  |
| 2 | 5 | 5   | 3.67    | 1.30  |
| 2 | 5 | 6   | 1056.68 | 13.53 |
| 2 | 5 | 6   | 1062.01 | 14.09 |
| 2 | 5 | 6   | 911.30  | 15.52 |
| 2 | 5 | 6   | 947.93  | 14.68 |
| 2 | 5 | 7   | 233.62  | 5.24  |
| 2 | 5 | 7   | 225.15  | 5.59  |
| 2 | 5 | 7   | 195.73  | 5.96  |
| 2 | 5 | 7   | 177.71  | 6.02  |
| 2 | 5 | 8   | 260.63  | 6.40  |
| 2 | 6 | -15 | 15.34   | 1.49  |
| 2 | 6 | -15 | 16.93   | 1.25  |
| 2 | 6 | -15 | 14.79   | 1.08  |
| 2 | 6 | -14 | 25.62   | 2.29  |
| 2 | 6 | -14 | 27.49   | 2.02  |
| 2 | 6 | -14 | 24.10   | 1.67  |
| 2 | 6 | -13 | 16.33   | 2.14  |
| 2 | 6 | -13 | 13.45   | 1.84  |
| 2 | 6 | -13 | 13.26   | 1.86  |
| 2 | 6 | -13 | 19.10   | 1.67  |
| 2 | 6 | -12 | 53.60   | 3.79  |
| 2 | 6 | -12 | 55.15   | 3.56  |
| 2 | 6 | -12 | 52.66   | 3.47  |
| 2 | 6 | -12 | 43.38   | 2.92  |
| 2 | 6 | -12 | 42.71   | 2.51  |
| 2 | 6 | -11 | 65.69   | 4.14  |

## CIF 31

|   |   |     |        |       |
|---|---|-----|--------|-------|
| 2 | 6 | -11 | 78.28  | 4.38  |
| 2 | 6 | -11 | 83.94  | 4.48  |
| 2 | 6 | -11 | 77.55  | 2.73  |
| 2 | 6 | -11 | 71.85  | 3.66  |
| 2 | 6 | -11 | 76.82  | 4.06  |
| 2 | 6 | -10 | 494.40 | 11.03 |
| 2 | 6 | -10 | 498.46 | 11.42 |
| 2 | 6 | -10 | 499.65 | 11.81 |
| 2 | 6 | -10 | 526.55 | 11.65 |
| 2 | 6 | -10 | 544.78 | 11.79 |
| 2 | 6 | -10 | 482.02 | 7.84  |
| 2 | 6 | -10 | 512.52 | 10.53 |
| 2 | 6 | -10 | 529.94 | 9.73  |
| 2 | 6 | -10 | 514.04 | 11.18 |
| 2 | 6 | -9  | 32.81  | 2.46  |
| 2 | 6 | -9  | 38.65  | 3.01  |
| 2 | 6 | -9  | 35.41  | 3.01  |
| 2 | 6 | -9  | 33.73  | 3.02  |
| 2 | 6 | -9  | 29.81  | 2.75  |
| 2 | 6 | -9  | 31.65  | 2.61  |
| 2 | 6 | -9  | 32.03  | 2.36  |
| 2 | 6 | -9  | 29.57  | 2.71  |
| 2 | 6 | -9  | 32.12  | 2.81  |
| 2 | 6 | -8  | 303.84 | 7.51  |
| 2 | 6 | -8  | 315.66 | 6.40  |
| 2 | 6 | -8  | 281.33 | 7.76  |
| 2 | 6 | -8  | 324.49 | 8.52  |
| 2 | 6 | -8  | 308.08 | 7.31  |
| 2 | 6 | -8  | 290.82 | 6.62  |
| 2 | 6 | -8  | 285.23 | 7.28  |
| 2 | 6 | -8  | 310.63 | 8.01  |
| 2 | 6 | -8  | 301.45 | 7.04  |
| 2 | 6 | -8  | 277.02 | 7.85  |
| 2 | 6 | -8  | 322.46 | 8.36  |
| 2 | 6 | -7  | 739.77 | 12.55 |
| 2 | 6 | -7  | 736.59 | 10.83 |
| 2 | 6 | -7  | 754.76 | 13.09 |
| 2 | 6 | -7  | 725.15 | 12.54 |
| 2 | 6 | -7  | 771.20 | 13.36 |
| 2 | 6 | -7  | 779.18 | 12.30 |
| 2 | 6 | -7  | 856.90 | 12.77 |

## CIF 31

|   |   |    |        |       |
|---|---|----|--------|-------|
| 2 | 6 | -7 | 780.47 | 12.19 |
| 2 | 6 | -7 | 749.71 | 12.66 |
| 2 | 6 | -7 | 759.01 | 13.27 |
| 2 | 6 | -7 | 720.31 | 12.96 |
| 2 | 6 | -7 | 808.03 | 13.05 |
| 2 | 6 | -7 | 757.34 | 11.80 |
| 2 | 6 | -7 | 705.11 | 12.76 |
| 2 | 6 | -7 | 779.84 | 13.58 |
| 2 | 6 | -6 | 374.43 | 8.36  |
| 2 | 6 | -6 | 335.21 | 7.86  |
| 2 | 6 | -6 | 303.86 | 6.26  |
| 2 | 6 | -6 | 316.88 | 7.69  |
| 2 | 6 | -6 | 345.66 | 7.83  |
| 2 | 6 | -6 | 321.17 | 7.47  |
| 2 | 6 | -6 | 340.37 | 7.88  |
| 2 | 6 | -6 | 291.46 | 6.92  |
| 2 | 6 | -6 | 347.01 | 8.13  |
| 2 | 6 | -6 | 326.32 | 7.95  |
| 2 | 6 | -6 | 330.66 | 7.82  |
| 2 | 6 | -6 | 320.03 | 6.94  |
| 2 | 6 | -6 | 307.31 | 7.40  |
| 2 | 6 | -6 | 304.92 | 6.60  |
| 2 | 6 | -6 | 327.10 | 6.72  |
| 2 | 6 | -5 | 39.64  | 2.73  |
| 2 | 6 | -5 | 42.19  | 2.65  |
| 2 | 6 | -5 | 40.83  | 2.20  |
| 2 | 6 | -5 | 42.03  | 2.29  |
| 2 | 6 | -5 | 38.58  | 2.67  |
| 2 | 6 | -5 | 39.38  | 2.60  |
| 2 | 6 | -5 | 51.09  | 2.94  |
| 2 | 6 | -5 | 44.07  | 2.56  |
| 2 | 6 | -5 | 41.04  | 2.75  |
| 2 | 6 | -5 | 41.06  | 2.40  |
| 2 | 6 | -5 | 34.44  | 2.26  |
| 2 | 6 | -5 | 37.31  | 2.09  |
| 2 | 6 | -5 | 42.83  | 2.80  |
| 2 | 6 | -5 | 38.97  | 2.43  |
| 2 | 6 | -4 | 12.32  | 1.70  |
| 2 | 6 | -4 | 11.90  | 1.49  |
| 2 | 6 | -4 | 12.57  | 1.34  |
| 2 | 6 | -4 | 13.63  | 1.35  |

## CIF 31

|   |   |    |        |      |
|---|---|----|--------|------|
| 2 | 6 | -4 | 13.79  | 1.73 |
| 2 | 6 | -4 | 9.49   | 1.38 |
| 2 | 6 | -4 | 14.10  | 1.69 |
| 2 | 6 | -4 | 12.86  | 1.45 |
| 2 | 6 | -4 | 10.30  | 1.24 |
| 2 | 6 | -4 | 10.58  | 1.15 |
| 2 | 6 | -4 | 10.68  | 1.52 |
| 2 | 6 | -4 | 11.64  | 1.54 |
| 2 | 6 | -3 | 127.49 | 4.75 |
| 2 | 6 | -3 | 126.58 | 4.21 |
| 2 | 6 | -3 | 133.68 | 3.92 |
| 2 | 6 | -3 | 121.78 | 3.68 |
| 2 | 6 | -3 | 144.51 | 5.02 |
| 2 | 6 | -3 | 119.82 | 4.50 |
| 2 | 6 | -3 | 139.11 | 4.47 |
| 2 | 6 | -3 | 146.32 | 4.92 |
| 2 | 6 | -3 | 134.59 | 4.12 |
| 2 | 6 | -3 | 113.39 | 3.09 |
| 2 | 6 | -3 | 138.65 | 4.61 |
| 2 | 6 | -3 | 136.49 | 4.82 |
| 2 | 6 | -2 | 46.72  | 2.39 |
| 2 | 6 | -2 | 50.28  | 2.46 |
| 2 | 6 | -2 | 48.57  | 2.29 |
| 2 | 6 | -2 | 54.45  | 3.02 |
| 2 | 6 | -2 | 50.39  | 2.58 |
| 2 | 6 | -2 | 55.25  | 3.02 |
| 2 | 6 | -2 | 50.61  | 3.01 |
| 2 | 6 | -2 | 54.79  | 2.61 |
| 2 | 6 | -2 | 51.81  | 2.75 |
| 2 | 6 | -2 | 52.09  | 3.14 |
| 2 | 6 | -1 | 3.05   | 0.78 |
| 2 | 6 | -1 | 1.66   | 0.73 |
| 2 | 6 | -1 | 2.35   | 0.90 |
| 2 | 6 | -1 | 3.57   | 1.13 |
| 2 | 6 | -1 | 3.28   | 1.09 |
| 2 | 6 | -1 | 1.62   | 0.97 |
| 2 | 6 | -1 | 2.43   | 0.81 |
| 2 | 6 | -1 | 3.58   | 1.39 |
| 2 | 6 | 0  | 267.79 | 6.08 |
| 2 | 6 | 0  | 244.61 | 5.38 |
| 2 | 6 | 0  | 249.09 | 6.38 |

## CIF 31

|   |   |     |         |       |
|---|---|-----|---------|-------|
| 2 | 6 | 0   | 235.96  | 6.06  |
| 2 | 6 | 0   | 259.40  | 6.69  |
| 2 | 6 | 0   | 277.97  | 6.11  |
| 2 | 6 | 0   | 233.61  | 5.48  |
| 2 | 6 | 0   | 228.47  | 6.92  |
| 2 | 6 | 1   | 498.78  | 8.27  |
| 2 | 6 | 1   | 486.47  | 8.79  |
| 2 | 6 | 1   | 493.97  | 9.31  |
| 2 | 6 | 1   | 518.80  | 9.06  |
| 2 | 6 | 1   | 533.20  | 9.83  |
| 2 | 6 | 1   | 538.35  | 9.10  |
| 2 | 6 | 1   | 446.25  | 10.50 |
| 2 | 6 | 2   | 1204.00 | 14.99 |
| 2 | 6 | 2   | 1128.26 | 16.69 |
| 2 | 6 | 2   | 1293.44 | 16.13 |
| 2 | 6 | 2   | 1201.47 | 17.37 |
| 2 | 6 | 2   | 1140.97 | 15.59 |
| 2 | 6 | 2   | 1201.60 | 15.95 |
| 2 | 6 | 2   | 1187.54 | 16.14 |
| 2 | 6 | 2   | 1291.28 | 16.13 |
| 2 | 6 | 2   | 1184.23 | 18.26 |
| 2 | 6 | 3   | 26.93   | 1.83  |
| 2 | 6 | 3   | 26.72   | 2.28  |
| 2 | 6 | 3   | 29.65   | 2.15  |
| 2 | 6 | 3   | 31.32   | 2.21  |
| 2 | 6 | 3   | 27.79   | 2.08  |
| 2 | 6 | 3   | 26.65   | 2.65  |
| 2 | 6 | 4   | 32.62   | 2.05  |
| 2 | 6 | 4   | 29.93   | 2.23  |
| 2 | 6 | 4   | 30.46   | 2.22  |
| 2 | 6 | 4   | 32.37   | 2.31  |
| 2 | 6 | 4   | 29.44   | 2.66  |
| 2 | 6 | 5   | 298.65  | 8.35  |
| 2 | 6 | 5   | 298.26  | 7.79  |
| 2 | 6 | 6   | 44.29   | 3.01  |
| 2 | 6 | 6   | 48.17   | 2.62  |
| 2 | 6 | 6   | 43.36   | 3.11  |
| 2 | 6 | 7   | 15.60   | 1.64  |
| 2 | 6 | 7   | 14.46   | 1.75  |
| 2 | 7 | -14 | 21.82   | 1.98  |
| 2 | 7 | -14 | 21.44   | 1.66  |

## CIF 31

|   |   |     |        |       |
|---|---|-----|--------|-------|
| 2 | 7 | -14 | 20.18  | 1.32  |
| 2 | 7 | -13 | 2.01   | 1.11  |
| 2 | 7 | -13 | 3.40   | 1.29  |
| 2 | 7 | -13 | 4.90   | 1.04  |
| 2 | 7 | -12 | 16.24  | 2.35  |
| 2 | 7 | -12 | 16.41  | 2.13  |
| 2 | 7 | -12 | 17.89  | 2.23  |
| 2 | 7 | -12 | 15.88  | 1.87  |
| 2 | 7 | -12 | 15.91  | 1.57  |
| 2 | 7 | -11 | 867.69 | 15.46 |
| 2 | 7 | -11 | 836.69 | 15.11 |
| 2 | 7 | -11 | 883.22 | 15.49 |
| 2 | 7 | -11 | 829.67 | 10.57 |
| 2 | 7 | -11 | 866.26 | 14.04 |
| 2 | 7 | -11 | 805.26 | 14.32 |
| 2 | 7 | -10 | 44.49  | 3.30  |
| 2 | 7 | -10 | 46.04  | 3.55  |
| 2 | 7 | -10 | 40.96  | 2.07  |
| 2 | 7 | -10 | 44.53  | 3.18  |
| 2 | 7 | -10 | 40.49  | 2.58  |
| 2 | 7 | -10 | 47.01  | 3.39  |
| 2 | 7 | -9  | 226.85 | 6.54  |
| 2 | 7 | -9  | 214.86 | 6.18  |
| 2 | 7 | -9  | 231.16 | 7.53  |
| 2 | 7 | -9  | 218.54 | 7.08  |
| 2 | 7 | -9  | 230.24 | 6.19  |
| 2 | 7 | -9  | 221.87 | 7.27  |
| 2 | 7 | -8  | 1.06   | 1.17  |
| 2 | 7 | -8  | 2.35   | 1.32  |
| 2 | 7 | -8  | 1.32   | 1.05  |
| 2 | 7 | -8  | 1.91   | 1.22  |
| 2 | 7 | -8  | 1.70   | 1.09  |
| 2 | 7 | -8  | 1.12   | 1.19  |
| 2 | 7 | -8  | 1.30   | 0.98  |
| 2 | 7 | -8  | 2.80   | 1.45  |
| 2 | 7 | -8  | 1.46   | 1.02  |
| 2 | 7 | -8  | 2.08   | 1.47  |
| 2 | 7 | -8  | 0.92   | 1.37  |
| 2 | 7 | -7  | 267.18 | 7.41  |
| 2 | 7 | -7  | 266.22 | 5.96  |
| 2 | 7 | -7  | 289.83 | 7.93  |



## CIF 31

|   |   |    |        |       |
|---|---|----|--------|-------|
| 2 | 7 | -7 | 259.07 | 7.57  |
| 2 | 7 | -7 | 276.12 | 7.31  |
| 2 | 7 | -7 | 305.00 | 7.38  |
| 2 | 7 | -7 | 281.67 | 7.22  |
| 2 | 7 | -7 | 278.86 | 7.50  |
| 2 | 7 | -7 | 274.24 | 7.85  |
| 2 | 7 | -7 | 283.52 | 8.02  |
| 2 | 7 | -7 | 282.60 | 6.79  |
| 2 | 7 | -6 | 169.23 | 5.92  |
| 2 | 7 | -6 | 172.62 | 4.70  |
| 2 | 7 | -6 | 183.98 | 6.02  |
| 2 | 7 | -6 | 184.48 | 5.95  |
| 2 | 7 | -6 | 180.17 | 6.09  |
| 2 | 7 | -6 | 178.18 | 5.83  |
| 2 | 7 | -6 | 181.00 | 6.05  |
| 2 | 7 | -6 | 181.59 | 5.34  |
| 2 | 7 | -6 | 186.19 | 5.64  |
| 2 | 7 | -6 | 189.09 | 6.20  |
| 2 | 7 | -6 | 173.28 | 6.30  |
| 2 | 7 | -6 | 182.13 | 5.31  |
| 2 | 7 | -6 | 191.29 | 6.48  |
| 2 | 7 | -6 | 186.28 | 5.35  |
| 2 | 7 | -5 | 122.18 | 4.95  |
| 2 | 7 | -5 | 127.41 | 4.84  |
| 2 | 7 | -5 | 120.83 | 3.94  |
| 2 | 7 | -5 | 131.80 | 4.69  |
| 2 | 7 | -5 | 121.11 | 4.17  |
| 2 | 7 | -5 | 132.95 | 5.24  |
| 2 | 7 | -5 | 123.30 | 4.99  |
| 2 | 7 | -5 | 119.65 | 4.86  |
| 2 | 7 | -5 | 123.79 | 4.82  |
| 2 | 7 | -5 | 127.72 | 4.63  |
| 2 | 7 | -5 | 115.87 | 4.99  |
| 2 | 7 | -5 | 130.02 | 5.22  |
| 2 | 7 | -5 | 113.79 | 4.19  |
| 2 | 7 | -5 | 119.00 | 5.02  |
| 2 | 7 | -5 | 124.02 | 4.61  |
| 2 | 7 | -4 | 476.22 | 9.46  |
| 2 | 7 | -4 | 486.08 | 8.47  |
| 2 | 7 | -4 | 458.76 | 8.52  |
| 2 | 7 | -4 | 522.77 | 10.85 |

## CIF 31

|   |   |    |        |       |
|---|---|----|--------|-------|
| 2 | 7 | -4 | 529.35 | 10.82 |
| 2 | 7 | -4 | 440.29 | 9.89  |
| 2 | 7 | -4 | 501.69 | 9.84  |
| 2 | 7 | -4 | 527.13 | 10.63 |
| 2 | 7 | -4 | 525.67 | 9.52  |
| 2 | 7 | -4 | 494.07 | 9.37  |
| 2 | 7 | -4 | 501.74 | 9.57  |
| 2 | 7 | -4 | 494.92 | 10.18 |
| 2 | 7 | -4 | 483.18 | 10.13 |
| 2 | 7 | -3 | 53.39  | 3.29  |
| 2 | 7 | -3 | 47.97  | 2.68  |
| 2 | 7 | -3 | 49.16  | 2.53  |
| 2 | 7 | -3 | 54.04  | 3.42  |
| 2 | 7 | -3 | 49.16  | 3.19  |
| 2 | 7 | -3 | 52.78  | 2.90  |
| 2 | 7 | -3 | 42.97  | 2.42  |
| 2 | 7 | -3 | 55.00  | 3.32  |
| 2 | 7 | -3 | 57.90  | 3.48  |
| 2 | 7 | -3 | 51.01  | 2.80  |
| 2 | 7 | -3 | 54.98  | 3.16  |
| 2 | 7 | -3 | 62.22  | 3.54  |
| 2 | 7 | -2 | 3.88   | 1.41  |
| 2 | 7 | -2 | 3.07   | 0.95  |
| 2 | 7 | -2 | 7.42   | 1.51  |
| 2 | 7 | -2 | 3.46   | 1.01  |
| 2 | 7 | -2 | 3.02   | 1.18  |
| 2 | 7 | -2 | 3.80   | 1.08  |
| 2 | 7 | -2 | 3.36   | 1.03  |
| 2 | 7 | -2 | 2.12   | 1.42  |
| 2 | 7 | -1 | 231.16 | 6.67  |
| 2 | 7 | -1 | 237.37 | 5.78  |
| 2 | 7 | -1 | 211.12 | 5.37  |
| 2 | 7 | -1 | 235.63 | 7.11  |
| 2 | 7 | -1 | 231.09 | 6.52  |
| 2 | 7 | -1 | 205.07 | 6.05  |
| 2 | 7 | -1 | 227.12 | 6.72  |
| 2 | 7 | -1 | 216.29 | 5.70  |
| 2 | 7 | -1 | 203.99 | 5.67  |
| 2 | 7 | -1 | 229.65 | 7.20  |
| 2 | 7 | 0  | 778.87 | 12.99 |
| 2 | 7 | 0  | 740.65 | 11.63 |

## CIF 31

|   |   |   |        |       |
|---|---|---|--------|-------|
| 2 | 7 | 0 | 739.74 | 11.18 |
| 2 | 7 | 0 | 806.93 | 13.90 |
| 2 | 7 | 0 | 779.08 | 12.76 |
| 2 | 7 | 0 | 733.47 | 12.04 |
| 2 | 7 | 0 | 762.08 | 13.13 |
| 2 | 7 | 0 | 822.66 | 12.41 |
| 2 | 7 | 0 | 690.41 | 13.71 |
| 2 | 7 | 1 | 357.47 | 8.18  |
| 2 | 7 | 1 | 394.80 | 8.04  |
| 2 | 7 | 1 | 417.20 | 8.02  |
| 2 | 7 | 1 | 378.26 | 7.34  |
| 2 | 7 | 1 | 356.60 | 8.85  |
| 2 | 7 | 1 | 368.49 | 8.94  |
| 2 | 7 | 1 | 351.89 | 7.87  |
| 2 | 7 | 1 | 351.43 | 8.11  |
| 2 | 7 | 1 | 377.60 | 7.86  |
| 2 | 7 | 1 | 322.23 | 9.01  |
| 2 | 7 | 2 | 278.46 | 6.78  |
| 2 | 7 | 2 | 314.24 | 6.62  |
| 2 | 7 | 2 | 275.36 | 7.30  |
| 2 | 7 | 2 | 293.65 | 7.73  |
| 2 | 7 | 2 | 288.90 | 6.91  |
| 2 | 7 | 2 | 355.16 | 7.59  |
| 2 | 7 | 2 | 345.25 | 7.42  |
| 2 | 7 | 2 | 282.86 | 8.30  |
| 2 | 7 | 3 | 137.97 | 4.58  |
| 2 | 7 | 3 | 128.34 | 4.67  |
| 2 | 7 | 3 | 132.84 | 5.73  |
| 2 | 7 | 3 | 132.90 | 4.45  |
| 2 | 7 | 3 | 130.72 | 5.50  |
| 2 | 7 | 4 | 53.15  | 2.82  |
| 2 | 7 | 4 | 45.08  | 2.82  |
| 2 | 7 | 4 | 42.71  | 3.23  |
| 2 | 7 | 4 | 52.72  | 2.77  |
| 2 | 7 | 4 | 44.94  | 3.12  |
| 2 | 7 | 5 | 82.17  | 4.07  |
| 2 | 7 | 5 | 85.05  | 3.74  |
| 2 | 7 | 5 | 79.66  | 4.08  |
| 2 | 7 | 6 | 33.27  | 2.33  |
| 2 | 7 | 6 | 33.79  | 2.32  |
| 2 | 7 | 6 | 32.30  | 2.41  |

## CIF 31

|   |   |     |        |      |
|---|---|-----|--------|------|
| 2 | 7 | 7   | 440.48 | 7.00 |
| 2 | 8 | -14 | 4.81   | 0.98 |
| 2 | 8 | -14 | 6.53   | 0.89 |
| 2 | 8 | -14 | 7.19   | 0.69 |
| 2 | 8 | -13 | 10.95  | 1.54 |
| 2 | 8 | -13 | 12.80  | 1.47 |
| 2 | 8 | -13 | 9.80   | 1.42 |
| 2 | 8 | -13 | 8.27   | 0.95 |
| 2 | 8 | -12 | 133.33 | 5.06 |
| 2 | 8 | -12 | 117.70 | 4.45 |
| 2 | 8 | -12 | 122.95 | 4.79 |
| 2 | 8 | -12 | 110.22 | 3.85 |
| 2 | 8 | -12 | 130.41 | 3.63 |
| 2 | 8 | -11 | 13.45  | 2.04 |
| 2 | 8 | -11 | 9.22   | 1.56 |
| 2 | 8 | -11 | 9.28   | 1.67 |
| 2 | 8 | -10 | 399.13 | 9.65 |
| 2 | 8 | -10 | 391.35 | 9.57 |
| 2 | 8 | -10 | 364.76 | 6.28 |
| 2 | 8 | -10 | 391.80 | 9.22 |
| 2 | 8 | -10 | 370.16 | 9.26 |
| 2 | 8 | -9  | 1.26   | 1.23 |
| 2 | 8 | -9  | 1.49   | 1.13 |
| 2 | 8 | -9  | 2.66   | 1.54 |
| 2 | 8 | -9  | 0.88   | 1.20 |
| 2 | 8 | -9  | 1.10   | 0.88 |
| 2 | 8 | -9  | 5.12   | 1.53 |
| 2 | 8 | -8  | 391.89 | 9.15 |
| 2 | 8 | -8  | 368.05 | 9.21 |
| 2 | 8 | -8  | 386.17 | 9.34 |
| 2 | 8 | -8  | 395.87 | 8.72 |
| 2 | 8 | -8  | 397.35 | 8.75 |
| 2 | 8 | -8  | 391.76 | 9.19 |
| 2 | 8 | -8  | 385.75 | 8.37 |
| 2 | 8 | -8  | 399.81 | 9.66 |
| 2 | 8 | -8  | 384.50 | 9.70 |
| 2 | 8 | -8  | 401.49 | 8.27 |
| 2 | 8 | -7  | 65.13  | 3.85 |
| 2 | 8 | -7  | 57.72  | 3.52 |
| 2 | 8 | -7  | 69.87  | 3.84 |
| 2 | 8 | -7  | 72.85  | 4.09 |

## CIF 31

|   |   |    |        |       |
|---|---|----|--------|-------|
| 2 | 8 | -7 | 55.88  | 3.23  |
| 2 | 8 | -7 | 59.46  | 3.41  |
| 2 | 8 | -7 | 56.21  | 3.80  |
| 2 | 8 | -7 | 63.89  | 3.62  |
| 2 | 8 | -7 | 52.44  | 3.00  |
| 2 | 8 | -7 | 67.56  | 4.13  |
| 2 | 8 | -7 | 66.23  | 3.89  |
| 2 | 8 | -6 | 426.99 | 9.70  |
| 2 | 8 | -6 | 347.28 | 8.61  |
| 2 | 8 | -6 | 395.50 | 9.47  |
| 2 | 8 | -6 | 395.33 | 10.00 |
| 2 | 8 | -6 | 392.16 | 9.16  |
| 2 | 8 | -6 | 398.92 | 9.37  |
| 2 | 8 | -6 | 406.54 | 8.76  |
| 2 | 8 | -6 | 415.27 | 9.49  |
| 2 | 8 | -6 | 354.33 | 8.20  |
| 2 | 8 | -6 | 384.92 | 8.40  |
| 2 | 8 | -6 | 346.60 | 9.31  |
| 2 | 8 | -6 | 359.32 | 7.96  |
| 2 | 8 | -6 | 400.77 | 9.81  |
| 2 | 8 | -5 | 204.81 | 5.29  |
| 2 | 8 | -5 | 193.54 | 6.05  |
| 2 | 8 | -5 | 216.52 | 6.35  |
| 2 | 8 | -5 | 193.01 | 5.52  |
| 2 | 8 | -5 | 219.34 | 7.00  |
| 2 | 8 | -5 | 212.37 | 7.30  |
| 2 | 8 | -5 | 216.68 | 6.84  |
| 2 | 8 | -5 | 200.15 | 6.26  |
| 2 | 8 | -5 | 223.69 | 6.30  |
| 2 | 8 | -5 | 212.57 | 6.90  |
| 2 | 8 | -5 | 204.58 | 6.95  |
| 2 | 8 | -5 | 225.18 | 6.03  |
| 2 | 8 | -5 | 213.17 | 6.91  |
| 2 | 8 | -5 | 215.51 | 6.39  |
| 2 | 8 | -4 | 151.00 | 5.79  |
| 2 | 8 | -4 | 132.74 | 4.74  |
| 2 | 8 | -4 | 136.85 | 4.32  |
| 2 | 8 | -4 | 133.79 | 4.47  |
| 2 | 8 | -4 | 159.79 | 6.09  |
| 2 | 8 | -4 | 159.54 | 6.32  |
| 2 | 8 | -4 | 151.41 | 5.77  |

## CIF 31

|   |   |    |        |      |
|---|---|----|--------|------|
| 2 | 8 | -4 | 154.33 | 5.75 |
| 2 | 8 | -4 | 145.18 | 4.99 |
| 2 | 8 | -4 | 151.24 | 5.76 |
| 2 | 8 | -4 | 132.76 | 4.85 |
| 2 | 8 | -4 | 136.81 | 4.72 |
| 2 | 8 | -4 | 139.67 | 4.96 |
| 2 | 8 | -4 | 151.81 | 5.51 |
| 2 | 8 | -4 | 148.94 | 5.58 |
| 2 | 8 | -3 | 245.11 | 7.24 |
| 2 | 8 | -3 | 246.49 | 5.93 |
| 2 | 8 | -3 | 236.20 | 5.91 |
| 2 | 8 | -3 | 248.17 | 7.78 |
| 2 | 8 | -3 | 248.29 | 7.61 |
| 2 | 8 | -3 | 242.11 | 7.15 |
| 2 | 8 | -3 | 222.39 | 6.92 |
| 2 | 8 | -3 | 248.45 | 7.36 |
| 2 | 8 | -3 | 236.50 | 6.26 |
| 2 | 8 | -3 | 231.71 | 6.83 |
| 2 | 8 | -3 | 221.91 | 6.31 |
| 2 | 8 | -3 | 227.12 | 6.70 |
| 2 | 8 | -3 | 240.25 | 7.32 |
| 2 | 8 | -2 | 1.23   | 1.37 |
| 2 | 8 | -2 | 0.64   | 0.90 |
| 2 | 8 | -2 | 0.80   | 0.82 |
| 2 | 8 | -2 | 0.56   | 1.52 |
| 2 | 8 | -2 | 1.88   | 1.27 |
| 2 | 8 | -2 | 1.22   | 1.21 |
| 2 | 8 | -2 | -0.06  | 0.99 |
| 2 | 8 | -2 | 0.43   | 1.19 |
| 2 | 8 | -2 | 0.50   | 0.96 |
| 2 | 8 | -2 | 0.43   | 0.85 |
| 2 | 8 | -2 | -0.26  | 1.20 |
| 2 | 8 | -1 | 2.75   | 1.32 |
| 2 | 8 | -1 | 0.95   | 0.88 |
| 2 | 8 | -1 | 2.05   | 1.67 |
| 2 | 8 | -1 | 1.02   | 0.80 |
| 2 | 8 | -1 | 2.75   | 1.59 |
| 2 | 8 | -1 | 1.27   | 1.30 |
| 2 | 8 | -1 | 2.84   | 1.22 |
| 2 | 8 | -1 | 5.76   | 1.53 |
| 2 | 8 | -1 | 1.44   | 1.00 |

## CIF 31

|   |   |    |        |      |
|---|---|----|--------|------|
| 2 | 8 | -1 | 1.17   | 1.32 |
| 2 | 8 | -1 | 1.18   | 0.97 |
| 2 | 8 | -1 | 0.75   | 1.36 |
| 2 | 8 | 0  | 167.65 | 5.52 |
| 2 | 8 | 0  | 178.46 | 5.14 |
| 2 | 8 | 0  | 167.20 | 4.83 |
| 2 | 8 | 0  | 172.87 | 6.41 |
| 2 | 8 | 0  | 166.06 | 6.12 |
| 2 | 8 | 0  | 159.24 | 5.88 |
| 2 | 8 | 0  | 161.32 | 5.28 |
| 2 | 8 | 0  | 164.38 | 6.28 |
| 2 | 8 | 0  | 173.50 | 5.32 |
| 2 | 8 | 0  | 158.51 | 6.14 |
| 2 | 8 | 1  | 16.46  | 1.77 |
| 2 | 8 | 1  | 19.29  | 1.83 |
| 2 | 8 | 1  | 16.96  | 1.58 |
| 2 | 8 | 1  | 16.91  | 2.31 |
| 2 | 8 | 1  | 18.49  | 2.14 |
| 2 | 8 | 1  | 17.56  | 2.08 |
| 2 | 8 | 1  | 17.29  | 1.69 |
| 2 | 8 | 1  | 18.40  | 2.35 |
| 2 | 8 | 1  | 18.30  | 1.80 |
| 2 | 8 | 1  | 16.57  | 2.28 |
| 2 | 8 | 1  | 16.07  | 1.73 |
| 2 | 8 | 2  | 45.54  | 2.59 |
| 2 | 8 | 2  | 48.40  | 3.21 |
| 2 | 8 | 2  | 42.07  | 2.69 |
| 2 | 8 | 2  | 41.96  | 2.74 |
| 2 | 8 | 2  | 42.16  | 3.31 |
| 2 | 8 | 2  | 44.92  | 2.63 |
| 2 | 8 | 2  | 45.18  | 3.29 |
| 2 | 8 | 2  | 42.06  | 2.58 |
| 2 | 8 | 2  | 45.78  | 3.28 |
| 2 | 8 | 3  | 362.29 | 7.18 |
| 2 | 8 | 3  | 349.64 | 7.83 |
| 2 | 8 | 3  | 339.44 | 7.04 |
| 2 | 8 | 3  | 300.24 | 8.23 |
| 2 | 8 | 3  | 372.38 | 7.46 |
| 2 | 8 | 3  | 337.23 | 8.32 |
| 2 | 8 | 3  | 325.74 | 8.44 |
| 2 | 8 | 4  | 269.24 | 7.13 |

## CIF 31

|   |   |     |        |       |
|---|---|-----|--------|-------|
| 2 | 8 | 4   | 276.65 | 6.77  |
| 2 | 8 | 5   | 34.49  | 2.32  |
| 2 | 8 | 5   | 27.80  | 1.73  |
| 2 | 8 | 5   | 30.81  | 2.15  |
| 2 | 8 | 6   | 5.95   | 0.87  |
| 2 | 8 | 6   | 4.64   | 0.98  |
| 2 | 9 | -13 | 227.70 | 4.74  |
| 2 | 9 | -13 | 226.77 | 3.50  |
| 2 | 9 | -12 | 6.26   | 1.19  |
| 2 | 9 | -12 | 8.83   | 0.93  |
| 2 | 9 | -11 | 155.94 | 4.86  |
| 2 | 9 | -11 | 141.39 | 4.79  |
| 2 | 9 | -11 | 150.57 | 5.05  |
| 2 | 9 | -11 | 136.14 | 4.53  |
| 2 | 9 | -11 | 149.63 | 4.90  |
| 2 | 9 | -10 | 8.01   | 1.45  |
| 2 | 9 | -10 | 8.51   | 1.60  |
| 2 | 9 | -10 | 5.94   | 1.53  |
| 2 | 9 | -10 | 6.38   | 0.81  |
| 2 | 9 | -10 | 7.26   | 1.49  |
| 2 | 9 | -10 | 8.24   | 1.59  |
| 2 | 9 | -9  | 634.98 | 10.82 |
| 2 | 9 | -9  | 608.48 | 11.64 |
| 2 | 9 | -9  | 597.11 | 8.43  |
| 2 | 9 | -9  | 638.11 | 11.95 |
| 2 | 9 | -8  | 297.19 | 7.68  |
| 2 | 9 | -8  | 297.51 | 7.18  |
| 2 | 9 | -8  | 311.93 | 7.42  |
| 2 | 9 | -8  | 305.51 | 7.79  |
| 2 | 9 | -8  | 293.35 | 7.03  |
| 2 | 9 | -8  | 298.98 | 7.80  |
| 2 | 9 | -8  | 289.28 | 8.06  |
| 2 | 9 | -8  | 287.69 | 7.99  |
| 2 | 9 | -7  | 31.82  | 2.69  |
| 2 | 9 | -7  | 29.99  | 2.55  |
| 2 | 9 | -7  | 28.11  | 2.27  |
| 2 | 9 | -7  | 32.64  | 2.84  |
| 2 | 9 | -7  | 28.93  | 2.44  |
| 2 | 9 | -7  | 28.00  | 2.50  |
| 2 | 9 | -7  | 29.77  | 2.15  |
| 2 | 9 | -7  | 26.75  | 2.56  |



## CIF 31

|   |   |    |        |       |
|---|---|----|--------|-------|
| 2 | 9 | -6 | 247.44 | 7.38  |
| 2 | 9 | -6 | 276.82 | 7.68  |
| 2 | 9 | -6 | 267.17 | 7.90  |
| 2 | 9 | -6 | 266.84 | 7.35  |
| 2 | 9 | -6 | 281.81 | 7.07  |
| 2 | 9 | -6 | 255.88 | 6.59  |
| 2 | 9 | -6 | 233.20 | 6.66  |
| 2 | 9 | -6 | 264.75 | 7.78  |
| 2 | 9 | -6 | 256.03 | 6.35  |
| 2 | 9 | -6 | 250.61 | 7.41  |
| 2 | 9 | -5 | 64.11  | 3.50  |
| 2 | 9 | -5 | 71.41  | 4.17  |
| 2 | 9 | -5 | 71.59  | 4.34  |
| 2 | 9 | -5 | 67.80  | 3.85  |
| 2 | 9 | -5 | 59.26  | 3.18  |
| 2 | 9 | -5 | 66.74  | 3.44  |
| 2 | 9 | -5 | 62.29  | 3.73  |
| 2 | 9 | -5 | 62.27  | 3.15  |
| 2 | 9 | -5 | 62.11  | 3.59  |
| 2 | 9 | -5 | 68.68  | 3.56  |
| 2 | 9 | -4 | 452.63 | 10.03 |
| 2 | 9 | -4 | 365.81 | 7.64  |
| 2 | 9 | -4 | 418.75 | 10.28 |
| 2 | 9 | -4 | 417.80 | 9.81  |
| 2 | 9 | -4 | 419.32 | 9.63  |
| 2 | 9 | -4 | 420.50 | 9.27  |
| 2 | 9 | -4 | 453.58 | 9.18  |
| 2 | 9 | -4 | 405.67 | 9.44  |
| 2 | 9 | -4 | 391.40 | 8.20  |
| 2 | 9 | -4 | 382.63 | 8.85  |
| 2 | 9 | -4 | 425.35 | 9.50  |
| 2 | 9 | -3 | 324.56 | 8.26  |
| 2 | 9 | -3 | 311.46 | 6.84  |
| 2 | 9 | -3 | 326.68 | 8.20  |
| 2 | 9 | -3 | 338.51 | 9.33  |
| 2 | 9 | -3 | 316.52 | 7.98  |
| 2 | 9 | -3 | 305.72 | 7.34  |
| 2 | 9 | -3 | 328.82 | 8.44  |
| 2 | 9 | -3 | 338.21 | 7.49  |
| 2 | 9 | -3 | 326.76 | 7.96  |
| 2 | 9 | -3 | 335.32 | 8.58  |

## CIF 31

|   |   |    |        |      |
|---|---|----|--------|------|
| 2 | 9 | -2 | 386.96 | 8.75 |
| 2 | 9 | -2 | 339.03 | 7.02 |
| 2 | 9 | -2 | 326.98 | 6.94 |
| 2 | 9 | -2 | 353.36 | 9.36 |
| 2 | 9 | -2 | 379.29 | 9.15 |
| 2 | 9 | -2 | 390.05 | 8.62 |
| 2 | 9 | -2 | 330.56 | 7.79 |
| 2 | 9 | -2 | 375.05 | 7.92 |
| 2 | 9 | -2 | 374.05 | 8.15 |
| 2 | 9 | -2 | 373.27 | 8.78 |
| 2 | 9 | -2 | 360.57 | 9.00 |
| 2 | 9 | -2 | 332.62 | 7.68 |
| 2 | 9 | -1 | 23.56  | 2.24 |
| 2 | 9 | -1 | 27.94  | 2.01 |
| 2 | 9 | -1 | 24.31  | 2.74 |
| 2 | 9 | -1 | 24.36  | 2.53 |
| 2 | 9 | -1 | 27.24  | 2.56 |
| 2 | 9 | -1 | 28.76  | 2.17 |
| 2 | 9 | -1 | 22.04  | 2.35 |
| 2 | 9 | -1 | 27.22  | 2.61 |
| 2 | 9 | -1 | 24.30  | 2.25 |
| 2 | 9 | 0  | 2.84   | 1.06 |
| 2 | 9 | 0  | 3.88   | 1.53 |
| 2 | 9 | 0  | 3.03   | 1.31 |
| 2 | 9 | 0  | 1.89   | 1.15 |
| 2 | 9 | 0  | 3.69   | 1.49 |
| 2 | 9 | 0  | 2.64   | 1.00 |
| 2 | 9 | 0  | 1.48   | 0.81 |
| 2 | 9 | 0  | 3.75   | 1.43 |
| 2 | 9 | 0  | 2.75   | 1.15 |
| 2 | 9 | 1  | 33.04  | 2.58 |
| 2 | 9 | 1  | 27.59  | 2.19 |
| 2 | 9 | 1  | 30.08  | 2.29 |
| 2 | 9 | 1  | 34.58  | 2.72 |
| 2 | 9 | 1  | 32.17  | 2.64 |
| 2 | 9 | 1  | 31.79  | 2.49 |
| 2 | 9 | 2  | 140.79 | 4.59 |
| 2 | 9 | 2  | 136.16 | 4.06 |
| 2 | 9 | 2  | 149.00 | 4.94 |
| 2 | 9 | 2  | 138.44 | 4.97 |
| 2 | 9 | 2  | 139.27 | 4.90 |

## CIF 31

|   |    |     |        |      |
|---|----|-----|--------|------|
| 2 | 9  | 2   | 140.84 | 4.92 |
| 2 | 9  | 3   | 46.36  | 2.17 |
| 2 | 9  | 3   | 61.47  | 2.82 |
| 2 | 9  | 4   | 19.87  | 1.67 |
| 2 | 9  | 4   | 20.09  | 1.38 |
| 2 | 9  | 5   | 29.37  | 1.51 |
| 2 | 10 | -11 | 76.59  | 2.48 |
| 2 | 10 | -11 | 73.42  | 1.89 |
| 2 | 10 | -10 | 145.97 | 4.29 |
| 2 | 10 | -10 | 159.46 | 4.51 |
| 2 | 10 | -10 | 149.67 | 4.55 |
| 2 | 10 | -9  | 287.76 | 6.64 |
| 2 | 10 | -9  | 296.41 | 6.16 |
| 2 | 10 | -9  | 279.93 | 6.29 |
| 2 | 10 | -9  | 275.03 | 4.32 |
| 2 | 10 | -9  | 280.38 | 6.77 |
| 2 | 10 | -9  | 274.67 | 6.73 |
| 2 | 10 | -8  | 9.19   | 1.33 |
| 2 | 10 | -8  | 9.37   | 1.55 |
| 2 | 10 | -8  | 9.59   | 1.37 |
| 2 | 10 | -8  | 9.02   | 1.47 |
| 2 | 10 | -7  | 0.44   | 1.01 |
| 2 | 10 | -7  | 2.50   | 1.34 |
| 2 | 10 | -7  | 1.30   | 0.87 |
| 2 | 10 | -7  | 2.11   | 1.16 |
| 2 | 10 | -7  | 0.14   | 0.83 |
| 2 | 10 | -6  | 133.09 | 4.18 |
| 2 | 10 | -6  | 131.68 | 4.85 |
| 2 | 10 | -6  | 136.82 | 5.12 |
| 2 | 10 | -6  | 134.60 | 4.77 |
| 2 | 10 | -6  | 133.24 | 4.92 |
| 2 | 10 | -6  | 116.74 | 4.44 |
| 2 | 10 | -5  | 58.18  | 3.29 |
| 2 | 10 | -5  | 55.76  | 2.94 |
| 2 | 10 | -5  | 56.45  | 3.43 |
| 2 | 10 | -5  | 61.96  | 3.62 |
| 2 | 10 | -5  | 54.70  | 3.24 |
| 2 | 10 | -5  | 53.52  | 3.10 |
| 2 | 10 | -5  | 49.88  | 2.75 |
| 2 | 10 | -4  | 24.78  | 2.23 |
| 2 | 10 | -4  | 21.41  | 2.04 |

## CIF 31

|   |    |    |        |      |
|---|----|----|--------|------|
| 2 | 10 | -4 | 19.92  | 2.36 |
| 2 | 10 | -4 | 24.58  | 2.31 |
| 2 | 10 | -4 | 19.59  | 1.93 |
| 2 | 10 | -4 | 20.30  | 1.96 |
| 2 | 10 | -3 | 35.01  | 2.48 |
| 2 | 10 | -3 | 34.64  | 2.22 |
| 2 | 10 | -3 | 29.10  | 2.67 |
| 2 | 10 | -3 | 36.33  | 2.79 |
| 2 | 10 | -3 | 36.11  | 2.64 |
| 2 | 10 | -3 | 28.67  | 2.08 |
| 2 | 10 | -3 | 30.46  | 2.37 |
| 2 | 10 | -2 | 103.01 | 3.80 |
| 2 | 10 | -2 | 105.95 | 4.27 |
| 2 | 10 | -2 | 100.57 | 3.83 |
| 2 | 10 | -2 | 92.77  | 4.25 |
| 2 | 10 | -2 | 110.22 | 4.51 |
| 2 | 10 | -2 | 95.76  | 4.11 |
| 2 | 10 | -2 | 97.19  | 3.82 |
| 2 | 10 | -2 | 109.13 | 4.33 |
| 2 | 10 | -1 | 67.57  | 2.79 |
| 2 | 10 | -1 | 70.27  | 3.27 |
| 2 | 10 | -1 | 76.98  | 3.56 |
| 2 | 10 | -1 | 70.19  | 3.30 |
| 2 | 10 | -1 | 73.38  | 3.48 |
| 2 | 10 | -1 | 71.03  | 3.31 |
| 2 | 10 | -1 | 72.50  | 3.49 |
| 2 | 10 | 0  | 25.02  | 2.03 |
| 2 | 10 | 0  | 28.31  | 2.17 |
| 2 | 10 | 0  | 25.21  | 1.89 |
| 2 | 10 | 0  | 28.56  | 1.98 |
| 2 | 10 | 0  | 26.71  | 2.07 |
| 2 | 10 | 0  | 27.66  | 2.15 |
| 2 | 10 | 1  | 8.76   | 1.32 |
| 2 | 10 | 1  | 7.68   | 1.20 |
| 2 | 10 | 1  | 9.37   | 1.28 |
| 2 | 10 | 2  | 4.32   | 0.87 |
| 2 | 10 | 2  | 4.56   | 0.95 |
| 2 | 10 | 2  | 3.35   | 0.75 |
| 2 | 10 | 3  | 30.43  | 1.54 |
| 2 | 11 | -9 | 7.28   | 0.82 |
| 2 | 11 | -8 | 26.94  | 1.53 |

## CIF 31

|   |     |    |        |      |
|---|-----|----|--------|------|
| 2 | 11  | -8 | 54.18  | 2.29 |
| 2 | 11  | -7 | 143.19 | 3.76 |
| 2 | 11  | -7 | 157.38 | 4.31 |
| 2 | 11  | -6 | 28.33  | 1.91 |
| 2 | 11  | -6 | 26.70  | 1.99 |
| 2 | 11  | -5 | 46.21  | 2.57 |
| 2 | 11  | -5 | 47.03  | 2.64 |
| 2 | 11  | -5 | 42.35  | 1.98 |
| 2 | 11  | -4 | 18.75  | 1.76 |
| 2 | 11  | -4 | 16.22  | 1.75 |
| 2 | 11  | -4 | 17.44  | 1.46 |
| 2 | 11  | -3 | 14.45  | 1.41 |
| 2 | 11  | -3 | 14.40  | 1.52 |
| 2 | 11  | -2 | 208.55 | 4.75 |
| 2 | 11  | -2 | 197.69 | 4.82 |
| 2 | 11  | -1 | 48.66  | 2.17 |
| 2 | 11  | -1 | 56.71  | 2.33 |
| 2 | 11  | 0  | 46.40  | 1.85 |
| 3 | -13 | 0  | 59.28  | 1.42 |
| 3 | -13 | 0  | 56.73  | 1.74 |
| 3 | -13 | 1  | 61.89  | 2.16 |
| 3 | -13 | 1  | 68.03  | 1.82 |
| 3 | -13 | 2  | 12.12  | 1.01 |
| 3 | -13 | 2  | 12.16  | 0.92 |
| 3 | -13 | 3  | 111.60 | 2.94 |
| 3 | -13 | 4  | 94.42  | 2.34 |
| 3 | -13 | 5  | 8.03   | 0.73 |
| 3 | -13 | 6  | 47.61  | 1.31 |
| 3 | -13 | 6  | 57.70  | 1.87 |
| 3 | -12 | -3 | 236.33 | 4.64 |
| 3 | -12 | -2 | 8.22   | 1.09 |
| 3 | -12 | -2 | 6.47   | 0.93 |
| 3 | -12 | -1 | 87.82  | 3.26 |
| 3 | -12 | -1 | 89.93  | 3.09 |
| 3 | -12 | 0  | 1.15   | 0.69 |
| 3 | -12 | 0  | 0.64   | 0.76 |
| 3 | -12 | 1  | 17.94  | 1.33 |
| 3 | -12 | 1  | 17.74  | 1.62 |
| 3 | -12 | 2  | 38.67  | 1.96 |
| 3 | -12 | 2  | 40.81  | 2.06 |
| 3 | -12 | 2  | 35.00  | 2.09 |

## CIF 31

|   |     |    |         |       |
|---|-----|----|---------|-------|
| 3 | -12 | 3  | 208.62  | 4.74  |
| 3 | -12 | 3  | 219.17  | 5.18  |
| 3 | -12 | 4  | 3.22    | 0.87  |
| 3 | -12 | 4  | 1.82    | 0.72  |
| 3 | -12 | 4  | 2.25    | 0.72  |
| 3 | -12 | 4  | 2.14    | 0.75  |
| 3 | -12 | 5  | 148.51  | 3.66  |
| 3 | -12 | 5  | 139.91  | 3.75  |
| 3 | -12 | 5  | 138.73  | 4.06  |
| 3 | -12 | 5  | 139.06  | 3.85  |
| 3 | -12 | 5  | 142.24  | 3.63  |
| 3 | -12 | 6  | 22.44   | 1.42  |
| 3 | -12 | 6  | 22.69   | 1.63  |
| 3 | -12 | 6  | 20.76   | 1.42  |
| 3 | -12 | 6  | 18.92   | 1.24  |
| 3 | -12 | 6  | 23.60   | 1.75  |
| 3 | -12 | 6  | 19.74   | 1.29  |
| 3 | -12 | 7  | 18.72   | 1.26  |
| 3 | -12 | 7  | 20.34   | 1.46  |
| 3 | -12 | 7  | 22.05   | 1.55  |
| 3 | -12 | 8  | 80.42   | 2.20  |
| 3 | -12 | 8  | 87.88   | 2.63  |
| 3 | -12 | 8  | 84.05   | 2.62  |
| 3 | -12 | 9  | 2.67    | 0.63  |
| 3 | -12 | 9  | 1.71    | 0.56  |
| 3 | -11 | -6 | 103.81  | 2.13  |
| 3 | -11 | -5 | 146.84  | 3.00  |
| 3 | -11 | -5 | 119.08  | 3.54  |
| 3 | -11 | -4 | 89.72   | 3.32  |
| 3 | -11 | -4 | 87.16   | 3.12  |
| 3 | -11 | -3 | 50.47   | 2.01  |
| 3 | -11 | -3 | 44.80   | 2.61  |
| 3 | -11 | -3 | 45.34   | 2.14  |
| 3 | -11 | -3 | 46.68   | 2.45  |
| 3 | -11 | -2 | 12.74   | 1.14  |
| 3 | -11 | -2 | 12.51   | 1.30  |
| 3 | -11 | -2 | 14.44   | 1.62  |
| 3 | -11 | -2 | 14.02   | 1.36  |
| 3 | -11 | -2 | 14.77   | 1.27  |
| 3 | -11 | -1 | 1193.44 | 13.20 |
| 3 | -11 | -1 | 1167.59 | 14.92 |

## CIF 31

|   |     |    |         |       |
|---|-----|----|---------|-------|
| 3 | -11 | -1 | 1163.30 | 15.92 |
| 3 | -11 | 0  | 127.06  | 4.15  |
| 3 | -11 | 0  | 138.62  | 4.05  |
| 3 | -11 | 1  | 18.08   | 1.65  |
| 3 | -11 | 1  | 16.19   | 1.61  |
| 3 | -11 | 1  | 19.50   | 1.70  |
| 3 | -11 | 1  | 17.97   | 1.82  |
| 3 | -11 | 2  | 137.63  | 4.24  |
| 3 | -11 | 2  | 130.42  | 3.66  |
| 3 | -11 | 2  | 126.81  | 4.28  |
| 3 | -11 | 2  | 144.21  | 4.30  |
| 3 | -11 | 2  | 120.32  | 4.34  |
| 3 | -11 | 3  | 12.63   | 1.48  |
| 3 | -11 | 3  | 11.71   | 1.55  |
| 3 | -11 | 3  | 10.60   | 1.19  |
| 3 | -11 | 3  | 9.62    | 1.31  |
| 3 | -11 | 3  | 9.99    | 1.41  |
| 3 | -11 | 3  | 12.21   | 1.47  |
| 3 | -11 | 3  | 10.87   | 1.37  |
| 3 | -11 | 4  | 119.03  | 3.99  |
| 3 | -11 | 4  | 122.75  | 4.33  |
| 3 | -11 | 4  | 117.52  | 3.53  |
| 3 | -11 | 4  | 120.09  | 3.96  |
| 3 | -11 | 4  | 115.49  | 3.52  |
| 3 | -11 | 4  | 116.19  | 4.04  |
| 3 | -11 | 4  | 134.91  | 4.60  |
| 3 | -11 | 4  | 118.63  | 3.90  |
| 3 | -11 | 4  | 118.23  | 4.15  |
| 3 | -11 | 4  | 130.60  | 4.19  |
| 3 | -11 | 4  | 118.34  | 4.17  |
| 3 | -11 | 5  | 9.49    | 1.34  |
| 3 | -11 | 5  | 9.12    | 1.45  |
| 3 | -11 | 5  | 8.43    | 1.19  |
| 3 | -11 | 5  | 9.10    | 1.27  |
| 3 | -11 | 5  | 7.69    | 1.06  |
| 3 | -11 | 5  | 8.32    | 1.28  |
| 3 | -11 | 5  | 9.18    | 1.28  |
| 3 | -11 | 5  | 7.68    | 1.45  |
| 3 | -11 | 5  | 8.72    | 1.35  |
| 3 | -11 | 5  | 6.29    | 1.14  |
| 3 | -11 | 5  | 8.55    | 1.26  |

## CIF 31

|   |     |    |        |      |
|---|-----|----|--------|------|
| 3 | -11 | 6  | 294.78 | 6.26 |
| 3 | -11 | 6  | 287.37 | 6.46 |
| 3 | -11 | 6  | 284.49 | 5.63 |
| 3 | -11 | 6  | 298.45 | 6.64 |
| 3 | -11 | 6  | 301.98 | 6.33 |
| 3 | -11 | 6  | 277.00 | 5.63 |
| 3 | -11 | 6  | 269.44 | 6.20 |
| 3 | -11 | 6  | 303.72 | 5.81 |
| 3 | -11 | 6  | 306.19 | 6.82 |
| 3 | -11 | 6  | 260.28 | 6.09 |
| 3 | -11 | 6  | 280.21 | 6.00 |
| 3 | -11 | 7  | 310.45 | 6.23 |
| 3 | -11 | 7  | 301.48 | 6.44 |
| 3 | -11 | 7  | 282.17 | 5.46 |
| 3 | -11 | 7  | 306.33 | 6.40 |
| 3 | -11 | 7  | 298.61 | 6.10 |
| 3 | -11 | 7  | 278.22 | 5.52 |
| 3 | -11 | 7  | 283.31 | 6.14 |
| 3 | -11 | 7  | 299.22 | 5.26 |
| 3 | -11 | 7  | 309.45 | 6.55 |
| 3 | -11 | 7  | 256.53 | 5.79 |
| 3 | -11 | 7  | 271.36 | 5.64 |
| 3 | -11 | 8  | 19.29  | 1.63 |
| 3 | -11 | 8  | 17.86  | 1.50 |
| 3 | -11 | 8  | 19.96  | 1.64 |
| 3 | -11 | 8  | 19.76  | 1.55 |
| 3 | -11 | 8  | 16.74  | 1.29 |
| 3 | -11 | 8  | 21.17  | 1.62 |
| 3 | -11 | 8  | 17.61  | 1.57 |
| 3 | -11 | 8  | 16.32  | 1.37 |
| 3 | -11 | 8  | 18.77  | 1.36 |
| 3 | -11 | 9  | 0.77   | 0.66 |
| 3 | -11 | 9  | 2.40   | 0.79 |
| 3 | -11 | 9  | 1.97   | 0.84 |
| 3 | -11 | 9  | 2.06   | 0.69 |
| 3 | -11 | 9  | 2.64   | 0.62 |
| 3 | -11 | 9  | 1.62   | 0.66 |
| 3 | -11 | 9  | 1.92   | 0.83 |
| 3 | -11 | 10 | 1.20   | 0.60 |
| 3 | -11 | 10 | 1.08   | 0.54 |
| 3 | -11 | 10 | 0.86   | 0.62 |



## CIF 31

|   |     |    |         |       |
|---|-----|----|---------|-------|
| 3 | -11 | 11 | 42.40   | 1.43  |
| 3 | -10 | -7 | 24.19   | 1.43  |
| 3 | -10 | -7 | 30.37   | 1.49  |
| 3 | -10 | -6 | 130.71  | 3.40  |
| 3 | -10 | -6 | 109.39  | 3.81  |
| 3 | -10 | -5 | 4.91    | 1.01  |
| 3 | -10 | -5 | 1.21    | 0.97  |
| 3 | -10 | -5 | 2.39    | 0.81  |
| 3 | -10 | -5 | 2.33    | 0.91  |
| 3 | -10 | -5 | 2.48    | 0.76  |
| 3 | -10 | -4 | 47.24   | 2.34  |
| 3 | -10 | -4 | 48.26   | 2.56  |
| 3 | -10 | -4 | 50.62   | 2.87  |
| 3 | -10 | -4 | 45.25   | 2.51  |
| 3 | -10 | -3 | 81.59   | 3.46  |
| 3 | -10 | -3 | 88.61   | 3.86  |
| 3 | -10 | -3 | 77.61   | 3.36  |
| 3 | -10 | -3 | 81.97   | 2.85  |
| 3 | -10 | -3 | 80.81   | 3.35  |
| 3 | -10 | -3 | 87.04   | 3.41  |
| 3 | -10 | -2 | 27.88   | 2.17  |
| 3 | -10 | -2 | 26.82   | 2.31  |
| 3 | -10 | -2 | 25.40   | 2.01  |
| 3 | -10 | -2 | 27.40   | 1.86  |
| 3 | -10 | -2 | 22.98   | 1.87  |
| 3 | -10 | -1 | 4.76    | 1.13  |
| 3 | -10 | -1 | 5.33    | 1.22  |
| 3 | -10 | -1 | 4.85    | 1.10  |
| 3 | -10 | -1 | 5.98    | 1.18  |
| 3 | -10 | -1 | 3.93    | 1.04  |
| 3 | -10 | 0  | 2.77    | 1.02  |
| 3 | -10 | 0  | 3.70    | 1.17  |
| 3 | -10 | 0  | 3.23    | 1.06  |
| 3 | -10 | 0  | 2.43    | 1.15  |
| 3 | -10 | 0  | 2.44    | 0.96  |
| 3 | -10 | 0  | 2.03    | 0.90  |
| 3 | -10 | 1  | 1128.14 | 15.06 |
| 3 | -10 | 1  | 1075.77 | 14.00 |
| 3 | -10 | 1  | 1029.10 | 14.90 |
| 3 | -10 | 1  | 1049.35 | 15.70 |
| 3 | -10 | 1  | 1056.27 | 15.25 |

## CIF 31

|   |     |   |         |       |
|---|-----|---|---------|-------|
| 3 | -10 | 1 | 995.53  | 13.56 |
| 3 | -10 | 1 | 1043.98 | 14.89 |
| 3 | -10 | 1 | 1054.18 | 14.37 |
| 3 | -10 | 1 | 1013.43 | 14.12 |
| 3 | -10 | 2 | 1588.21 | 19.26 |
| 3 | -10 | 2 | 1533.84 | 19.44 |
| 3 | -10 | 2 | 1551.76 | 18.29 |
| 3 | -10 | 2 | 1557.51 | 18.98 |
| 3 | -10 | 2 | 1582.23 | 18.27 |
| 3 | -10 | 2 | 1562.87 | 19.40 |
| 3 | -10 | 2 | 1523.89 | 20.38 |
| 3 | -10 | 2 | 1440.44 | 19.37 |
| 3 | -10 | 2 | 1414.73 | 19.07 |
| 3 | -10 | 2 | 1508.14 | 19.22 |
| 3 | -10 | 2 | 1532.85 | 19.03 |
| 3 | -10 | 3 | 191.33  | 5.53  |
| 3 | -10 | 3 | 204.34  | 5.75  |
| 3 | -10 | 3 | 195.64  | 5.17  |
| 3 | -10 | 3 | 181.28  | 5.28  |
| 3 | -10 | 3 | 173.79  | 4.93  |
| 3 | -10 | 3 | 184.69  | 5.62  |
| 3 | -10 | 3 | 194.19  | 5.09  |
| 3 | -10 | 3 | 166.03  | 5.65  |
| 3 | -10 | 3 | 205.75  | 5.93  |
| 3 | -10 | 3 | 188.53  | 5.62  |
| 3 | -10 | 3 | 182.27  | 5.34  |
| 3 | -10 | 3 | 169.00  | 4.98  |
| 3 | -10 | 3 | 162.88  | 5.16  |
| 3 | -10 | 4 | 124.59  | 4.48  |
| 3 | -10 | 4 | 138.55  | 4.38  |
| 3 | -10 | 4 | 132.03  | 4.72  |
| 3 | -10 | 4 | 136.57  | 4.56  |
| 3 | -10 | 4 | 130.61  | 4.24  |
| 3 | -10 | 4 | 125.72  | 4.53  |
| 3 | -10 | 4 | 128.82  | 4.21  |
| 3 | -10 | 4 | 130.53  | 4.75  |
| 3 | -10 | 4 | 127.33  | 4.57  |
| 3 | -10 | 4 | 155.68  | 4.83  |
| 3 | -10 | 4 | 147.38  | 4.86  |
| 3 | -10 | 4 | 148.58  | 4.50  |
| 3 | -10 | 4 | 143.08  | 4.86  |

## CIF 31

|   |     |   |        |      |
|---|-----|---|--------|------|
| 3 | -10 | 5 | 52.50  | 3.01 |
| 3 | -10 | 5 | 52.29  | 2.99 |
| 3 | -10 | 5 | 58.21  | 3.12 |
| 3 | -10 | 5 | 53.16  | 2.84 |
| 3 | -10 | 5 | 53.05  | 2.76 |
| 3 | -10 | 5 | 54.77  | 3.07 |
| 3 | -10 | 5 | 53.13  | 2.78 |
| 3 | -10 | 5 | 52.52  | 3.18 |
| 3 | -10 | 5 | 54.48  | 3.13 |
| 3 | -10 | 5 | 57.59  | 3.05 |
| 3 | -10 | 5 | 53.51  | 2.82 |
| 3 | -10 | 5 | 45.39  | 2.48 |
| 3 | -10 | 6 | 3.63   | 1.12 |
| 3 | -10 | 6 | 3.88   | 1.33 |
| 3 | -10 | 6 | 4.75   | 1.23 |
| 3 | -10 | 6 | 4.58   | 1.22 |
| 3 | -10 | 6 | 5.43   | 1.13 |
| 3 | -10 | 6 | 4.54   | 1.21 |
| 3 | -10 | 6 | 3.54   | 0.94 |
| 3 | -10 | 6 | 4.72   | 1.12 |
| 3 | -10 | 6 | 4.93   | 1.40 |
| 3 | -10 | 6 | 5.24   | 1.23 |
| 3 | -10 | 6 | 3.26   | 1.09 |
| 3 | -10 | 6 | 5.25   | 1.19 |
| 3 | -10 | 6 | 2.85   | 3.31 |
| 3 | -10 | 7 | 199.50 | 5.47 |
| 3 | -10 | 7 | 193.86 | 5.40 |
| 3 | -10 | 7 | 186.49 | 5.46 |
| 3 | -10 | 7 | 178.46 | 4.32 |
| 3 | -10 | 7 | 199.27 | 5.64 |
| 3 | -10 | 7 | 183.30 | 5.25 |
| 3 | -10 | 7 | 194.72 | 5.11 |
| 3 | -10 | 8 | 248.09 | 6.01 |
| 3 | -10 | 8 | 243.62 | 5.95 |
| 3 | -10 | 8 | 238.82 | 6.09 |
| 3 | -10 | 8 | 247.96 | 6.06 |
| 3 | -10 | 8 | 237.62 | 5.78 |
| 3 | -10 | 8 | 238.81 | 5.48 |
| 3 | -10 | 8 | 239.32 | 6.09 |
| 3 | -10 | 9 | 4.93   | 1.11 |
| 3 | -10 | 9 | 4.01   | 1.00 |

## CIF 31

|   |     |    |        |      |
|---|-----|----|--------|------|
| 3 | -10 | 9  | 3.64   | 1.03 |
| 3 | -10 | 9  | 3.33   | 1.04 |
| 3 | -10 | 9  | 2.92   | 0.85 |
| 3 | -10 | 9  | 4.11   | 0.89 |
| 3 | -10 | 9  | 4.71   | 2.45 |
| 3 | -10 | 10 | 8.42   | 1.12 |
| 3 | -10 | 10 | 7.81   | 1.09 |
| 3 | -10 | 10 | 6.96   | 1.09 |
| 3 | -10 | 10 | 8.84   | 1.16 |
| 3 | -10 | 11 | 18.75  | 1.30 |
| 3 | -10 | 11 | 20.00  | 1.33 |
| 3 | -10 | 11 | 17.68  | 1.27 |
| 3 | -10 | 12 | 2.30   | 0.55 |
| 3 | -10 | 12 | 2.50   | 0.48 |
| 3 | -9  | -9 | 6.24   | 0.88 |
| 3 | -9  | -9 | 6.33   | 0.73 |
| 3 | -9  | -9 | 4.23   | 0.57 |
| 3 | -9  | -8 | 3.76   | 0.76 |
| 3 | -9  | -8 | 4.02   | 0.85 |
| 3 | -9  | -8 | 3.77   | 0.62 |
| 3 | -9  | -7 | 20.41  | 1.26 |
| 3 | -9  | -7 | 20.22  | 1.60 |
| 3 | -9  | -6 | 72.81  | 3.00 |
| 3 | -9  | -6 | 69.17  | 2.37 |
| 3 | -9  | -6 | 70.02  | 3.18 |
| 3 | -9  | -6 | 72.33  | 3.43 |
| 3 | -9  | -6 | 71.46  | 3.23 |
| 3 | -9  | -6 | 75.07  | 3.11 |
| 3 | -9  | -5 | 11.80  | 1.51 |
| 3 | -9  | -5 | 9.75   | 1.52 |
| 3 | -9  | -5 | 11.07  | 1.51 |
| 3 | -9  | -5 | 8.97   | 1.30 |
| 3 | -9  | -5 | 11.64  | 1.54 |
| 3 | -9  | -4 | 77.12  | 3.57 |
| 3 | -9  | -4 | 85.12  | 3.91 |
| 3 | -9  | -4 | 78.16  | 3.62 |
| 3 | -9  | -4 | 81.83  | 2.82 |
| 3 | -9  | -3 | 464.54 | 9.27 |
| 3 | -9  | -3 | 449.96 | 9.52 |
| 3 | -9  | -3 | 445.21 | 9.00 |
| 3 | -9  | -3 | 464.51 | 8.70 |

## CIF 31

|   |    |    |        |      |
|---|----|----|--------|------|
| 3 | -9 | -3 | 440.09 | 7.71 |
| 3 | -9 | -3 | 460.14 | 8.78 |
| 3 | -9 | -2 | 180.97 | 5.25 |
| 3 | -9 | -2 | 164.90 | 5.41 |
| 3 | -9 | -2 | 192.56 | 5.30 |
| 3 | -9 | -2 | 180.06 | 5.20 |
| 3 | -9 | -2 | 170.31 | 4.80 |
| 3 | -9 | -1 | 441.75 | 8.60 |
| 3 | -9 | -1 | 441.62 | 8.12 |
| 3 | -9 | -1 | 438.62 | 8.78 |
| 3 | -9 | -1 | 405.84 | 7.44 |
| 3 | -9 | -1 | 398.35 | 8.45 |
| 3 | -9 | -1 | 417.87 | 8.75 |
| 3 | -9 | -1 | 415.37 | 7.94 |
| 3 | -9 | -1 | 380.37 | 7.74 |
| 3 | -9 | -1 | 418.45 | 7.95 |
| 3 | -9 | 0  | 142.99 | 4.67 |
| 3 | -9 | 0  | 145.47 | 4.45 |
| 3 | -9 | 0  | 133.38 | 4.62 |
| 3 | -9 | 0  | 126.26 | 4.03 |
| 3 | -9 | 0  | 161.90 | 5.21 |
| 3 | -9 | 0  | 139.65 | 4.81 |
| 3 | -9 | 0  | 147.71 | 4.37 |
| 3 | -9 | 0  | 147.84 | 4.75 |
| 3 | -9 | 0  | 137.25 | 4.27 |
| 3 | -9 | 0  | 172.74 | 4.84 |
| 3 | -9 | 0  | 155.77 | 4.44 |
| 3 | -9 | 1  | 247.87 | 6.27 |
| 3 | -9 | 1  | 236.15 | 6.23 |
| 3 | -9 | 1  | 261.97 | 6.10 |
| 3 | -9 | 1  | 247.07 | 6.07 |
| 3 | -9 | 1  | 251.64 | 5.89 |
| 3 | -9 | 1  | 254.22 | 6.49 |
| 3 | -9 | 1  | 245.14 | 5.77 |
| 3 | -9 | 1  | 242.05 | 6.73 |
| 3 | -9 | 1  | 240.86 | 6.46 |
| 3 | -9 | 1  | 254.88 | 6.45 |
| 3 | -9 | 1  | 217.04 | 5.34 |
| 3 | -9 | 1  | 247.63 | 6.27 |
| 3 | -9 | 1  | 242.89 | 5.57 |
| 3 | -9 | 1  | 228.84 | 5.77 |

## CIF 31

|   |    |   |         |       |
|---|----|---|---------|-------|
| 3 | -9 | 1 | 240.90  | 5.91  |
| 3 | -9 | 2 | 11.41   | 1.59  |
| 3 | -9 | 2 | 12.94   | 1.59  |
| 3 | -9 | 2 | 10.05   | 1.57  |
| 3 | -9 | 2 | 12.28   | 1.72  |
| 3 | -9 | 2 | 10.17   | 1.54  |
| 3 | -9 | 2 | 11.26   | 1.47  |
| 3 | -9 | 2 | 9.88    | 1.35  |
| 3 | -9 | 2 | 11.87   | 1.58  |
| 3 | -9 | 2 | 14.29   | 1.50  |
| 3 | -9 | 2 | 10.11   | 1.54  |
| 3 | -9 | 2 | 11.77   | 1.71  |
| 3 | -9 | 2 | 12.77   | 1.61  |
| 3 | -9 | 2 | 9.71    | 1.14  |
| 3 | -9 | 2 | 14.09   | 1.66  |
| 3 | -9 | 3 | 181.86  | 5.58  |
| 3 | -9 | 3 | 178.68  | 5.28  |
| 3 | -9 | 3 | 193.43  | 5.40  |
| 3 | -9 | 3 | 192.33  | 5.25  |
| 3 | -9 | 3 | 197.51  | 5.61  |
| 3 | -9 | 3 | 182.45  | 5.16  |
| 3 | -9 | 3 | 177.45  | 5.76  |
| 3 | -9 | 3 | 193.86  | 5.67  |
| 3 | -9 | 3 | 153.52  | 4.95  |
| 3 | -9 | 3 | 189.63  | 5.35  |
| 3 | -9 | 3 | 163.90  | 4.82  |
| 3 | -9 | 3 | 147.16  | 5.97  |
| 3 | -9 | 4 | 908.35  | 14.16 |
| 3 | -9 | 4 | 919.43  | 13.64 |
| 3 | -9 | 4 | 893.82  | 13.57 |
| 3 | -9 | 4 | 885.71  | 13.83 |
| 3 | -9 | 4 | 884.00  | 13.75 |
| 3 | -9 | 4 | 1029.74 | 14.26 |
| 3 | -9 | 4 | 920.36  | 13.31 |
| 3 | -9 | 4 | 923.84  | 12.85 |
| 3 | -9 | 4 | 777.73  | 13.77 |
| 3 | -9 | 5 | 206.58  | 6.23  |
| 3 | -9 | 5 | 247.02  | 6.30  |
| 3 | -9 | 5 | 236.65  | 6.17  |
| 3 | -9 | 5 | 228.28  | 6.29  |
| 3 | -9 | 5 | 208.80  | 6.25  |

## CIF 31

|   |    |    |        |      |
|---|----|----|--------|------|
| 3 | -9 | 5  | 235.52 | 6.30 |
| 3 | -9 | 5  | 216.64 | 5.93 |
| 3 | -9 | 5  | 215.09 | 5.70 |
| 3 | -9 | 5  | 205.18 | 5.27 |
| 3 | -9 | 5  | 181.83 | 6.94 |
| 3 | -9 | 6  | 160.35 | 5.11 |
| 3 | -9 | 6  | 163.32 | 5.28 |
| 3 | -9 | 6  | 163.49 | 5.43 |
| 3 | -9 | 6  | 168.54 | 5.30 |
| 3 | -9 | 6  | 145.85 | 4.77 |
| 3 | -9 | 6  | 168.16 | 4.93 |
| 3 | -9 | 6  | 151.71 | 4.29 |
| 3 | -9 | 6  | 141.44 | 6.50 |
| 3 | -9 | 7  | 0.41   | 1.22 |
| 3 | -9 | 7  | 0.53   | 0.63 |
| 3 | -9 | 7  | 0.67   | 1.02 |
| 3 | -9 | 7  | 1.28   | 1.12 |
| 3 | -9 | 7  | 0.56   | 1.01 |
| 3 | -9 | 7  | 0.91   | 0.95 |
| 3 | -9 | 7  | -0.15  | 0.80 |
| 3 | -9 | 7  | 0.28   | 0.86 |
| 3 | -9 | 7  | 0.12   | 3.92 |
| 3 | -9 | 8  | 386.48 | 8.31 |
| 3 | -9 | 8  | 379.33 | 7.99 |
| 3 | -9 | 8  | 419.44 | 7.91 |
| 3 | -9 | 8  | 358.57 | 8.21 |
| 3 | -9 | 8  | 368.14 | 7.96 |
| 3 | -9 | 8  | 371.47 | 8.09 |
| 3 | -9 | 8  | 366.84 | 7.69 |
| 3 | -9 | 8  | 388.76 | 7.55 |
| 3 | -9 | 8  | 347.20 | 9.96 |
| 3 | -9 | 9  | 30.34  | 2.20 |
| 3 | -9 | 9  | 34.21  | 3.00 |
| 3 | -9 | 9  | 30.62  | 2.23 |
| 3 | -9 | 9  | 32.15  | 2.45 |
| 3 | -9 | 9  | 31.84  | 2.33 |
| 3 | -9 | 9  | 32.56  | 2.30 |
| 3 | -9 | 9  | 30.32  | 2.11 |
| 3 | -9 | 9  | 32.13  | 2.05 |
| 3 | -9 | 9  | 28.55  | 4.64 |
| 3 | -9 | 10 | 198.17 | 5.84 |

## CIF 31

|   |    |     |        |       |
|---|----|-----|--------|-------|
| 3 | -9 | 10  | 211.05 | 5.21  |
| 3 | -9 | 10  | 209.70 | 5.54  |
| 3 | -9 | 10  | 192.42 | 4.81  |
| 3 | -9 | 10  | 198.32 | 4.63  |
| 3 | -9 | 11  | 109.64 | 3.68  |
| 3 | -9 | 11  | 115.73 | 3.47  |
| 3 | -9 | 12  | 38.08  | 1.70  |
| 3 | -9 | 12  | 36.39  | 1.62  |
| 3 | -8 | -10 | 1.89   | 0.57  |
| 3 | -8 | -10 | 3.09   | 0.67  |
| 3 | -8 | -10 | 1.48   | 0.52  |
| 3 | -8 | -9  | 93.59  | 2.92  |
| 3 | -8 | -9  | 88.20  | 2.80  |
| 3 | -8 | -8  | 205.45 | 4.91  |
| 3 | -8 | -8  | 215.76 | 4.66  |
| 3 | -8 | -8  | 205.92 | 4.93  |
| 3 | -8 | -7  | 48.22  | 2.31  |
| 3 | -8 | -7  | 45.76  | 2.77  |
| 3 | -8 | -7  | 44.50  | 2.71  |
| 3 | -8 | -7  | 46.58  | 2.58  |
| 3 | -8 | -7  | 54.48  | 2.82  |
| 3 | -8 | -6  | 7.05   | 1.09  |
| 3 | -8 | -6  | 5.80   | 1.34  |
| 3 | -8 | -6  | 4.98   | 1.33  |
| 3 | -8 | -6  | 5.29   | 1.31  |
| 3 | -8 | -6  | 6.49   | 1.16  |
| 3 | -8 | -6  | 6.15   | 1.33  |
| 3 | -8 | -5  | 2.83   | 0.85  |
| 3 | -8 | -5  | 2.07   | 1.10  |
| 3 | -8 | -5  | 3.30   | 1.25  |
| 3 | -8 | -5  | 2.98   | 1.08  |
| 3 | -8 | -5  | 1.72   | 0.92  |
| 3 | -8 | -5  | 2.52   | 1.07  |
| 3 | -8 | -4  | 633.01 | 9.05  |
| 3 | -8 | -4  | 693.37 | 11.58 |
| 3 | -8 | -4  | 646.43 | 11.80 |
| 3 | -8 | -4  | 664.59 | 11.44 |
| 3 | -8 | -4  | 650.29 | 10.16 |
| 3 | -8 | -4  | 659.30 | 10.09 |
| 3 | -8 | -4  | 608.39 | 9.30  |
| 3 | -8 | -3  | 14.17  | 1.73  |



## CIF 31

|   |    |    |        |       |
|---|----|----|--------|-------|
| 3 | -8 | -3 | 12.05  | 1.46  |
| 3 | -8 | -3 | 12.08  | 1.32  |
| 3 | -8 | -3 | 12.40  | 1.46  |
| 3 | -8 | -3 | 13.74  | 1.35  |
| 3 | -8 | -2 | 921.63 | 13.19 |
| 3 | -8 | -2 | 868.66 | 12.58 |
| 3 | -8 | -2 | 887.59 | 13.19 |
| 3 | -8 | -2 | 874.08 | 12.12 |
| 3 | -8 | -2 | 861.71 | 12.63 |
| 3 | -8 | -2 | 772.70 | 12.75 |
| 3 | -8 | -2 | 964.77 | 12.72 |
| 3 | -8 | -2 | 902.67 | 12.13 |
| 3 | -8 | -2 | 881.74 | 12.48 |
| 3 | -8 | -2 | 836.86 | 12.03 |
| 3 | -8 | -1 | 364.22 | 7.43  |
| 3 | -8 | -1 | 347.39 | 7.04  |
| 3 | -8 | -1 | 382.52 | 7.75  |
| 3 | -8 | -1 | 361.24 | 6.95  |
| 3 | -8 | -1 | 337.62 | 7.39  |
| 3 | -8 | -1 | 333.16 | 7.44  |
| 3 | -8 | -1 | 342.99 | 7.39  |
| 3 | -8 | -1 | 348.81 | 6.78  |
| 3 | -8 | -1 | 365.30 | 7.41  |
| 3 | -8 | -1 | 358.25 | 6.75  |
| 3 | -8 | -1 | 312.90 | 6.61  |
| 3 | -8 | -1 | 333.70 | 6.76  |
| 3 | -8 | -1 | 345.89 | 6.41  |
| 3 | -8 | 0  | 199.71 | 4.96  |
| 3 | -8 | 0  | 189.75 | 4.94  |
| 3 | -8 | 0  | 195.64 | 5.26  |
| 3 | -8 | 0  | 199.72 | 5.12  |
| 3 | -8 | 0  | 193.65 | 5.20  |
| 3 | -8 | 0  | 175.46 | 4.83  |
| 3 | -8 | 0  | 194.65 | 5.34  |
| 3 | -8 | 0  | 187.76 | 4.91  |
| 3 | -8 | 0  | 198.96 | 5.58  |
| 3 | -8 | 0  | 187.19 | 5.30  |
| 3 | -8 | 0  | 186.39 | 5.22  |
| 3 | -8 | 0  | 194.86 | 4.73  |
| 3 | -8 | 0  | 212.86 | 5.41  |
| 3 | -8 | 0  | 192.43 | 4.85  |

## CIF 31

|   |    |   |        |       |
|---|----|---|--------|-------|
| 3 | -8 | 0 | 187.56 | 4.77  |
| 3 | -8 | 1 | 107.58 | 3.86  |
| 3 | -8 | 1 | 113.13 | 3.75  |
| 3 | -8 | 1 | 112.08 | 3.93  |
| 3 | -8 | 1 | 108.56 | 3.74  |
| 3 | -8 | 1 | 117.08 | 4.00  |
| 3 | -8 | 1 | 116.04 | 3.94  |
| 3 | -8 | 1 | 98.79  | 3.58  |
| 3 | -8 | 1 | 108.88 | 3.96  |
| 3 | -8 | 1 | 94.39  | 3.51  |
| 3 | -8 | 1 | 115.12 | 4.20  |
| 3 | -8 | 1 | 115.13 | 4.04  |
| 3 | -8 | 1 | 94.11  | 3.61  |
| 3 | -8 | 1 | 110.13 | 3.33  |
| 3 | -8 | 1 | 123.49 | 3.98  |
| 3 | -8 | 1 | 125.58 | 3.69  |
| 3 | -8 | 2 | 551.05 | 9.73  |
| 3 | -8 | 2 | 451.02 | 8.35  |
| 3 | -8 | 2 | 592.44 | 9.71  |
| 3 | -8 | 2 | 542.62 | 9.42  |
| 3 | -8 | 2 | 516.98 | 8.99  |
| 3 | -8 | 2 | 575.64 | 9.81  |
| 3 | -8 | 2 | 629.58 | 9.84  |
| 3 | -8 | 2 | 576.27 | 10.13 |
| 3 | -8 | 2 | 605.71 | 9.99  |
| 3 | -8 | 2 | 524.37 | 9.27  |
| 3 | -8 | 2 | 569.62 | 8.15  |
| 3 | -8 | 2 | 580.58 | 9.36  |
| 3 | -8 | 2 | 480.86 | 8.51  |
| 3 | -8 | 3 | 39.99  | 2.23  |
| 3 | -8 | 3 | 33.88  | 2.61  |
| 3 | -8 | 3 | 37.87  | 2.32  |
| 3 | -8 | 3 | 34.48  | 2.30  |
| 3 | -8 | 3 | 30.74  | 2.23  |
| 3 | -8 | 3 | 40.74  | 2.47  |
| 3 | -8 | 3 | 33.77  | 2.44  |
| 3 | -8 | 3 | 29.94  | 2.10  |
| 3 | -8 | 3 | 33.98  | 2.12  |
| 3 | -8 | 3 | 35.38  | 2.50  |
| 3 | -8 | 4 | 160.85 | 5.21  |
| 3 | -8 | 4 | 167.97 | 5.12  |

## CIF 31

|   |    |    |        |       |
|---|----|----|--------|-------|
| 3 | -8 | 4  | 172.03 | 5.15  |
| 3 | -8 | 4  | 175.91 | 5.43  |
| 3 | -8 | 4  | 166.64 | 4.90  |
| 3 | -8 | 4  | 160.62 | 4.62  |
| 3 | -8 | 4  | 160.61 | 4.83  |
| 3 | -8 | 4  | 183.93 | 5.37  |
| 3 | -8 | 4  | 167.02 | 4.51  |
| 3 | -8 | 5  | 96.68  | 4.17  |
| 3 | -8 | 5  | 101.40 | 3.84  |
| 3 | -8 | 5  | 91.30  | 3.90  |
| 3 | -8 | 5  | 89.86  | 3.75  |
| 3 | -8 | 5  | 107.30 | 4.28  |
| 3 | -8 | 5  | 97.12  | 3.76  |
| 3 | -8 | 5  | 98.36  | 3.69  |
| 3 | -8 | 5  | 102.71 | 3.49  |
| 3 | -8 | 6  | 139.02 | 4.95  |
| 3 | -8 | 6  | 141.83 | 4.93  |
| 3 | -8 | 6  | 147.37 | 4.65  |
| 3 | -8 | 6  | 151.03 | 4.62  |
| 3 | -8 | 6  | 132.18 | 3.88  |
| 3 | -8 | 6  | 155.66 | 5.26  |
| 3 | -8 | 7  | 517.98 | 10.30 |
| 3 | -8 | 7  | 557.27 | 10.21 |
| 3 | -8 | 7  | 527.17 | 9.62  |
| 3 | -8 | 7  | 509.13 | 8.01  |
| 3 | -8 | 7  | 542.06 | 10.76 |
| 3 | -8 | 8  | 5.74   | 1.37  |
| 3 | -8 | 8  | 6.93   | 1.21  |
| 3 | -8 | 8  | 7.05   | 1.25  |
| 3 | -8 | 8  | 5.27   | 1.19  |
| 3 | -8 | 8  | 6.45   | 2.40  |
| 3 | -8 | 9  | 28.55  | 2.25  |
| 3 | -8 | 9  | 23.50  | 1.96  |
| 3 | -8 | 9  | 29.81  | 2.10  |
| 3 | -8 | 10 | 78.99  | 3.25  |
| 3 | -8 | 10 | 93.54  | 4.25  |
| 3 | -8 | 10 | 90.95  | 3.76  |
| 3 | -8 | 10 | 83.91  | 3.33  |
| 3 | -8 | 10 | 86.15  | 3.26  |
| 3 | -8 | 10 | 77.25  | 5.10  |
| 3 | -8 | 11 | 9.10   | 2.38  |

## CIF 31

|   |    |     |        |      |
|---|----|-----|--------|------|
| 3 | -8 | 11  | 14.10  | 1.30 |
| 3 | -8 | 11  | 14.51  | 1.29 |
| 3 | -8 | 11  | 10.54  | 2.70 |
| 3 | -8 | 12  | 67.81  | 2.48 |
| 3 | -8 | 13  | 41.85  | 1.51 |
| 3 | -7 | -11 | 103.09 | 2.40 |
| 3 | -7 | -11 | 114.73 | 2.74 |
| 3 | -7 | -10 | 0.70   | 0.67 |
| 3 | -7 | -10 | 1.91   | 0.81 |
| 3 | -7 | -10 | 1.45   | 0.74 |
| 3 | -7 | -10 | 1.60   | 0.66 |
| 3 | -7 | -9  | 51.89  | 2.70 |
| 3 | -7 | -9  | 59.59  | 2.66 |
| 3 | -7 | -9  | 59.98  | 2.57 |
| 3 | -7 | -9  | 60.43  | 2.85 |
| 3 | -7 | -9  | 57.00  | 2.60 |
| 3 | -7 | -8  | 79.06  | 3.08 |
| 3 | -7 | -8  | 69.96  | 3.52 |
| 3 | -7 | -8  | 70.48  | 3.01 |
| 3 | -7 | -8  | 77.25  | 3.40 |
| 3 | -7 | -8  | 73.43  | 3.18 |
| 3 | -7 | -7  | 45.18  | 2.46 |
| 3 | -7 | -7  | 40.03  | 2.77 |
| 3 | -7 | -7  | 39.80  | 2.85 |
| 3 | -7 | -7  | 38.11  | 2.75 |
| 3 | -7 | -7  | 37.39  | 2.33 |
| 3 | -7 | -7  | 38.03  | 2.32 |
| 3 | -7 | -7  | 34.64  | 2.44 |
| 3 | -7 | -7  | 41.84  | 2.47 |
| 3 | -7 | -6  | 10.29  | 1.29 |
| 3 | -7 | -6  | 10.18  | 1.78 |
| 3 | -7 | -6  | 13.26  | 1.72 |
| 3 | -7 | -6  | 13.44  | 1.81 |
| 3 | -7 | -6  | 11.15  | 1.61 |
| 3 | -7 | -6  | 14.22  | 1.51 |
| 3 | -7 | -6  | 11.59  | 1.42 |
| 3 | -7 | -6  | 12.25  | 1.43 |
| 3 | -7 | -6  | 10.62  | 1.46 |
| 3 | -7 | -5  | 29.54  | 1.86 |
| 3 | -7 | -5  | 26.74  | 2.42 |
| 3 | -7 | -5  | 31.18  | 2.38 |

## CIF 31

|   |    |    |         |       |
|---|----|----|---------|-------|
| 3 | -7 | -5 | 27.04   | 2.33  |
| 3 | -7 | -5 | 29.18   | 2.29  |
| 3 | -7 | -5 | 29.68   | 2.05  |
| 3 | -7 | -5 | 29.44   | 2.05  |
| 3 | -7 | -5 | 30.04   | 2.04  |
| 3 | -7 | -5 | 30.85   | 2.14  |
| 3 | -7 | -4 | 205.35  | 5.70  |
| 3 | -7 | -4 | 204.12  | 5.64  |
| 3 | -7 | -4 | 181.56  | 4.88  |
| 3 | -7 | -4 | 184.03  | 4.91  |
| 3 | -7 | -4 | 185.67  | 4.89  |
| 3 | -7 | -4 | 169.33  | 4.23  |
| 3 | -7 | -3 | 47.94   | 2.29  |
| 3 | -7 | -3 | 50.51   | 2.68  |
| 3 | -7 | -3 | 54.36   | 2.81  |
| 3 | -7 | -3 | 57.70   | 2.63  |
| 3 | -7 | -3 | 41.47   | 2.22  |
| 3 | -7 | -3 | 49.39   | 2.73  |
| 3 | -7 | -3 | 48.09   | 2.68  |
| 3 | -7 | -3 | 56.10   | 2.57  |
| 3 | -7 | -3 | 50.22   | 2.45  |
| 3 | -7 | -2 | 1739.99 | 20.11 |
| 3 | -7 | -2 | 1737.58 | 19.65 |
| 3 | -7 | -2 | 1831.05 | 20.53 |
| 3 | -7 | -2 | 1740.61 | 19.42 |
| 3 | -7 | -2 | 1727.50 | 19.65 |
| 3 | -7 | -2 | 1730.13 | 20.42 |
| 3 | -7 | -2 | 1803.21 | 20.41 |
| 3 | -7 | -2 | 1755.12 | 19.19 |
| 3 | -7 | -2 | 1778.47 | 19.36 |
| 3 | -7 | -2 | 1664.53 | 19.10 |
| 3 | -7 | -1 | 279.12  | 5.61  |
| 3 | -7 | -1 | 329.92  | 6.61  |
| 3 | -7 | -1 | 323.01  | 6.36  |
| 3 | -7 | -1 | 319.12  | 6.41  |
| 3 | -7 | -1 | 317.90  | 6.29  |
| 3 | -7 | -1 | 302.46  | 6.11  |
| 3 | -7 | -1 | 315.25  | 5.65  |
| 3 | -7 | -1 | 303.74  | 6.47  |
| 3 | -7 | -1 | 324.85  | 6.70  |
| 3 | -7 | -1 | 305.56  | 6.42  |

## CIF 31

|   |    |    |         |       |
|---|----|----|---------|-------|
| 3 | -7 | -1 | 308.40  | 5.85  |
| 3 | -7 | -1 | 313.23  | 6.31  |
| 3 | -7 | -1 | 316.80  | 6.17  |
| 3 | -7 | -1 | 294.62  | 5.86  |
| 3 | -7 | 0  | 1964.45 | 19.65 |
| 3 | -7 | 0  | 1629.46 | 20.23 |
| 3 | -7 | 0  | 2041.91 | 21.69 |
| 3 | -7 | 0  | 1865.25 | 20.92 |
| 3 | -7 | 0  | 1886.75 | 20.98 |
| 3 | -7 | 0  | 2061.39 | 21.36 |
| 3 | -7 | 0  | 1882.60 | 20.78 |
| 3 | -7 | 0  | 1948.51 | 21.44 |
| 3 | -7 | 0  | 2216.48 | 21.70 |
| 3 | -7 | 0  | 1927.55 | 20.20 |
| 3 | -7 | 0  | 1918.47 | 21.63 |
| 3 | -7 | 0  | 2020.35 | 21.60 |
| 3 | -7 | 0  | 2124.45 | 21.69 |
| 3 | -7 | 0  | 2051.05 | 21.14 |
| 3 | -7 | 0  | 1937.88 | 20.09 |
| 3 | -7 | 0  | 1801.99 | 19.95 |
| 3 | -7 | 1  | 3158.23 | 30.63 |
| 3 | -7 | 1  | 2906.59 | 30.42 |
| 3 | -7 | 1  | 2896.78 | 30.21 |
| 3 | -7 | 1  | 3144.92 | 30.73 |
| 3 | -7 | 1  | 3074.18 | 30.34 |
| 3 | -7 | 1  | 3078.26 | 30.84 |
| 3 | -7 | 1  | 2600.99 | 29.74 |
| 3 | -7 | 1  | 3312.97 | 31.16 |
| 3 | -7 | 1  | 3072.54 | 31.26 |
| 3 | -7 | 1  | 2997.96 | 30.34 |
| 3 | -7 | 1  | 3066.59 | 30.05 |
| 3 | -7 | 1  | 3368.37 | 29.33 |
| 3 | -7 | 1  | 3037.90 | 29.21 |
| 3 | -7 | 1  | 3363.16 | 29.47 |
| 3 | -7 | 2  | 653.71  | 10.12 |
| 3 | -7 | 2  | 693.18  | 10.08 |
| 3 | -7 | 2  | 610.08  | 9.54  |
| 3 | -7 | 2  | 665.62  | 10.01 |
| 3 | -7 | 2  | 610.13  | 9.94  |
| 3 | -7 | 2  | 605.75  | 8.23  |
| 3 | -7 | 2  | 708.23  | 10.31 |

## CIF 31

|   |    |   |         |       |
|---|----|---|---------|-------|
| 3 | -7 | 2 | 638.33  | 10.45 |
| 3 | -7 | 2 | 654.64  | 9.72  |
| 3 | -7 | 2 | 691.24  | 9.71  |
| 3 | -7 | 2 | 634.93  | 8.35  |
| 3 | -7 | 2 | 732.96  | 9.66  |
| 3 | -7 | 3 | 1013.33 | 13.43 |
| 3 | -7 | 3 | 937.55  | 12.55 |
| 3 | -7 | 3 | 910.76  | 12.89 |
| 3 | -7 | 3 | 960.52  | 11.65 |
| 3 | -7 | 3 | 893.95  | 12.57 |
| 3 | -7 | 3 | 934.49  | 12.40 |
| 3 | -7 | 3 | 1013.30 | 12.45 |
| 3 | -7 | 3 | 910.87  | 10.39 |
| 3 | -7 | 4 | 207.88  | 5.45  |
| 3 | -7 | 4 | 206.81  | 4.79  |
| 3 | -7 | 4 | 216.21  | 5.68  |
| 3 | -7 | 4 | 219.75  | 5.22  |
| 3 | -7 | 4 | 212.27  | 5.03  |
| 3 | -7 | 5 | 40.71   | 2.05  |
| 3 | -7 | 5 | 34.27   | 2.05  |
| 3 | -7 | 5 | 36.49   | 2.37  |
| 3 | -7 | 5 | 27.00   | 1.93  |
| 3 | -7 | 5 | 27.47   | 1.88  |
| 3 | -7 | 5 | 39.63   | 2.46  |
| 3 | -7 | 6 | 2.36    | 1.02  |
| 3 | -7 | 6 | 1.58    | 0.74  |
| 3 | -7 | 6 | 1.03    | 0.83  |
| 3 | -7 | 6 | 1.66    | 0.86  |
| 3 | -7 | 6 | 1.45    | 0.87  |
| 3 | -7 | 6 | 4.91    | 0.83  |
| 3 | -7 | 6 | 1.84    | 1.09  |
| 3 | -7 | 7 | 46.70   | 2.83  |
| 3 | -7 | 7 | 50.16   | 2.81  |
| 3 | -7 | 7 | 49.21   | 2.72  |
| 3 | -7 | 7 | 51.46   | 2.71  |
| 3 | -7 | 8 | 50.17   | 2.94  |
| 3 | -7 | 8 | 56.32   | 2.87  |
| 3 | -7 | 8 | 54.21   | 2.88  |
| 3 | -7 | 8 | 52.02   | 2.78  |
| 3 | -7 | 9 | 14.65   | 1.65  |
| 3 | -7 | 9 | 15.33   | 1.64  |

## CIF 31

|   |    |     |        |      |
|---|----|-----|--------|------|
| 3 | -7 | 9   | 15.37  | 1.64 |
| 3 | -7 | 9   | 11.93  | 1.81 |
| 3 | -7 | 10  | 181.81 | 5.13 |
| 3 | -7 | 10  | 191.42 | 5.13 |
| 3 | -7 | 10  | 182.99 | 6.44 |
| 3 | -7 | 11  | 57.54  | 3.22 |
| 3 | -7 | 11  | 55.46  | 2.59 |
| 3 | -7 | 11  | 54.85  | 2.51 |
| 3 | -7 | 11  | 51.27  | 3.86 |
| 3 | -7 | 12  | 20.97  | 2.49 |
| 3 | -7 | 13  | 84.97  | 2.27 |
| 3 | -6 | -12 | 104.22 | 3.13 |
| 3 | -6 | -12 | 95.04  | 2.67 |
| 3 | -6 | -11 | 6.59   | 0.91 |
| 3 | -6 | -11 | 5.64   | 0.99 |
| 3 | -6 | -11 | 6.17   | 0.84 |
| 3 | -6 | -11 | 5.56   | 1.02 |
| 3 | -6 | -10 | 3.13   | 1.00 |
| 3 | -6 | -10 | 2.74   | 0.92 |
| 3 | -6 | -10 | 5.39   | 1.19 |
| 3 | -6 | -10 | 3.11   | 0.92 |
| 3 | -6 | -10 | 3.74   | 1.12 |
| 3 | -6 | -9  | 117.88 | 3.99 |
| 3 | -6 | -9  | 123.28 | 4.29 |
| 3 | -6 | -9  | 120.71 | 3.90 |
| 3 | -6 | -8  | 37.69  | 2.30 |
| 3 | -6 | -8  | 29.93  | 2.71 |
| 3 | -6 | -8  | 39.43  | 2.80 |
| 3 | -6 | -8  | 35.48  | 2.66 |
| 3 | -6 | -8  | 37.65  | 2.49 |
| 3 | -6 | -8  | 37.14  | 2.25 |
| 3 | -6 | -8  | 39.01  | 2.37 |
| 3 | -6 | -7  | 5.78   | 1.13 |
| 3 | -6 | -7  | 3.55   | 1.36 |
| 3 | -6 | -7  | 4.51   | 1.25 |
| 3 | -6 | -7  | 3.85   | 1.24 |
| 3 | -6 | -7  | 4.27   | 1.05 |
| 3 | -6 | -7  | 5.29   | 1.05 |
| 3 | -6 | -7  | 5.61   | 1.12 |
| 3 | -6 | -7  | 5.01   | 1.15 |
| 3 | -6 | -6  | 8.15   | 1.46 |



## CIF 31

|   |    |    |        |      |
|---|----|----|--------|------|
| 3 | -6 | -6 | 8.07   | 1.37 |
| 3 | -6 | -6 | 6.40   | 1.30 |
| 3 | -6 | -6 | 6.95   | 1.19 |
| 3 | -6 | -6 | 6.73   | 1.16 |
| 3 | -6 | -6 | 6.21   | 1.14 |
| 3 | -6 | -6 | 8.82   | 1.25 |
| 3 | -6 | -5 | 3.28   | 1.07 |
| 3 | -6 | -5 | 1.74   | 0.90 |
| 3 | -6 | -5 | 0.13   | 0.85 |
| 3 | -6 | -5 | 0.46   | 0.72 |
| 3 | -6 | -5 | 0.63   | 0.76 |
| 3 | -6 | -5 | 0.41   | 0.70 |
| 3 | -6 | -5 | 0.44   | 0.77 |
| 3 | -6 | -4 | 571.12 | 9.60 |
| 3 | -6 | -4 | 577.24 | 9.08 |
| 3 | -6 | -4 | 559.47 | 8.17 |
| 3 | -6 | -4 | 586.75 | 8.85 |
| 3 | -6 | -4 | 587.27 | 9.11 |
| 3 | -6 | -3 | 326.81 | 6.50 |
| 3 | -6 | -3 | 330.48 | 6.40 |
| 3 | -6 | -3 | 319.57 | 6.53 |
| 3 | -6 | -3 | 356.27 | 6.49 |
| 3 | -6 | -3 | 338.36 | 5.80 |
| 3 | -6 | -3 | 317.78 | 5.85 |
| 3 | -6 | -3 | 349.86 | 6.79 |
| 3 | -6 | -3 | 304.91 | 6.36 |
| 3 | -6 | -3 | 336.37 | 6.30 |
| 3 | -6 | -3 | 332.25 | 6.26 |
| 3 | -6 | -3 | 333.73 | 6.14 |
| 3 | -6 | -2 | 301.16 | 5.02 |
| 3 | -6 | -2 | 263.34 | 4.78 |
| 3 | -6 | -2 | 290.00 | 5.95 |
| 3 | -6 | -2 | 295.20 | 5.81 |
| 3 | -6 | -2 | 301.53 | 5.78 |
| 3 | -6 | -2 | 348.09 | 6.36 |
| 3 | -6 | -2 | 282.92 | 5.67 |
| 3 | -6 | -2 | 311.24 | 5.43 |
| 3 | -6 | -2 | 267.84 | 5.52 |
| 3 | -6 | -2 | 295.84 | 6.00 |
| 3 | -6 | -2 | 302.39 | 5.91 |
| 3 | -6 | -2 | 301.58 | 5.71 |

## CIF 31

|   |    |    |        |       |
|---|----|----|--------|-------|
| 3 | -6 | -2 | 303.64 | 5.51  |
| 3 | -6 | -2 | 299.43 | 5.70  |
| 3 | -6 | -2 | 299.40 | 5.48  |
| 3 | -6 | -1 | 239.21 | 4.45  |
| 3 | -6 | -1 | 225.46 | 4.55  |
| 3 | -6 | -1 | 236.88 | 5.14  |
| 3 | -6 | -1 | 265.54 | 5.19  |
| 3 | -6 | -1 | 231.63 | 5.00  |
| 3 | -6 | -1 | 235.66 | 5.01  |
| 3 | -6 | -1 | 243.65 | 5.07  |
| 3 | -6 | -1 | 243.11 | 4.98  |
| 3 | -6 | -1 | 239.68 | 5.15  |
| 3 | -6 | -1 | 230.41 | 4.94  |
| 3 | -6 | -1 | 227.83 | 4.62  |
| 3 | -6 | -1 | 242.93 | 4.93  |
| 3 | -6 | -1 | 236.48 | 5.13  |
| 3 | -6 | -1 | 241.37 | 5.15  |
| 3 | -6 | -1 | 237.84 | 4.95  |
| 3 | -6 | -1 | 264.34 | 5.06  |
| 3 | -6 | -1 | 246.04 | 4.67  |
| 3 | -6 | 0  | 786.79 | 10.04 |
| 3 | -6 | 0  | 811.93 | 10.52 |
| 3 | -6 | 0  | 748.80 | 10.12 |
| 3 | -6 | 0  | 763.37 | 10.39 |
| 3 | -6 | 0  | 786.58 | 10.32 |
| 3 | -6 | 0  | 861.12 | 10.88 |
| 3 | -6 | 0  | 751.25 | 9.81  |
| 3 | -6 | 0  | 806.02 | 10.54 |
| 3 | -6 | 0  | 788.13 | 10.24 |
| 3 | -6 | 0  | 764.51 | 8.22  |
| 3 | -6 | 0  | 799.58 | 10.53 |
| 3 | -6 | 0  | 752.15 | 10.56 |
| 3 | -6 | 0  | 921.94 | 10.70 |
| 3 | -6 | 0  | 672.56 | 9.59  |
| 3 | -6 | 0  | 796.26 | 9.57  |
| 3 | -6 | 0  | 775.77 | 9.82  |
| 3 | -6 | 1  | 188.23 | 4.25  |
| 3 | -6 | 1  | 177.10 | 3.67  |
| 3 | -6 | 1  | 177.41 | 4.22  |
| 3 | -6 | 1  | 171.00 | 4.06  |
| 3 | -6 | 1  | 175.98 | 4.24  |

## CIF 31

|   |    |   |         |       |
|---|----|---|---------|-------|
| 3 | -6 | 1 | 160.36  | 4.13  |
| 3 | -6 | 1 | 168.50  | 3.22  |
| 3 | -6 | 1 | 176.79  | 4.20  |
| 3 | -6 | 1 | 174.23  | 4.37  |
| 3 | -6 | 1 | 190.09  | 4.17  |
| 3 | -6 | 1 | 179.34  | 3.92  |
| 3 | -6 | 1 | 162.97  | 3.40  |
| 3 | -6 | 2 | 863.30  | 10.96 |
| 3 | -6 | 2 | 834.60  | 10.69 |
| 3 | -6 | 2 | 862.44  | 11.20 |
| 3 | -6 | 2 | 766.53  | 10.44 |
| 3 | -6 | 2 | 782.82  | 9.65  |
| 3 | -6 | 2 | 882.17  | 11.05 |
| 3 | -6 | 2 | 815.11  | 11.28 |
| 3 | -6 | 2 | 806.66  | 10.46 |
| 3 | -6 | 2 | 876.86  | 10.46 |
| 3 | -6 | 2 | 824.10  | 9.28  |
| 3 | -6 | 3 | 3376.27 | 31.38 |
| 3 | -6 | 3 | 2984.84 | 30.24 |
| 3 | -6 | 3 | 3316.52 | 30.10 |
| 3 | -6 | 3 | 3286.41 | 30.53 |
| 3 | -6 | 3 | 3285.11 | 30.33 |
| 3 | -6 | 3 | 3097.97 | 28.11 |
| 3 | -6 | 4 | 0.55    | 0.56  |
| 3 | -6 | 4 | 1.21    | 0.72  |
| 3 | -6 | 4 | 2.10    | 0.87  |
| 3 | -6 | 4 | 0.83    | 0.66  |
| 3 | -6 | 5 | 2653.23 | 27.36 |
| 3 | -6 | 5 | 2551.35 | 26.71 |
| 3 | -6 | 5 | 2712.94 | 27.47 |
| 3 | -6 | 5 | 2745.50 | 26.87 |
| 3 | -6 | 5 | 2537.65 | 26.19 |
| 3 | -6 | 6 | 19.91   | 1.80  |
| 3 | -6 | 6 | 17.81   | 1.57  |
| 3 | -6 | 6 | 17.39   | 1.59  |
| 3 | -6 | 6 | 19.39   | 1.62  |
| 3 | -6 | 7 | 143.80  | 4.58  |
| 3 | -6 | 7 | 142.28  | 4.41  |
| 3 | -6 | 7 | 144.23  | 4.42  |
| 3 | -6 | 8 | 561.48  | 10.06 |
| 3 | -6 | 8 | 531.38  | 10.29 |

## CIF 31

|   |    |     |        |      |
|---|----|-----|--------|------|
| 3 | -6 | 8   | 548.87 | 9.43 |
| 3 | -6 | 8   | 554.02 | 9.66 |
| 3 | -6 | 9   | 7.06   | 1.23 |
| 3 | -6 | 9   | 5.65   | 1.22 |
| 3 | -6 | 9   | 6.42   | 1.45 |
| 3 | -6 | 10  | 2.09   | 0.96 |
| 3 | -6 | 10  | 1.73   | 1.28 |
| 3 | -6 | 11  | 313.33 | 7.38 |
| 3 | -6 | 11  | 290.29 | 6.77 |
| 3 | -6 | 11  | 256.99 | 5.94 |
| 3 | -6 | 11  | 233.41 | 7.02 |
| 3 | -6 | 12  | 59.61  | 3.25 |
| 3 | -6 | 12  | 64.30  | 2.46 |
| 3 | -5 | -13 | 37.62  | 1.52 |
| 3 | -5 | -13 | 37.79  | 1.60 |
| 3 | -5 | -12 | 356.22 | 7.10 |
| 3 | -5 | -12 | 369.59 | 6.56 |
| 3 | -5 | -11 | 39.56  | 1.95 |
| 3 | -5 | -11 | 39.23  | 2.38 |
| 3 | -5 | -11 | 41.09  | 2.26 |
| 3 | -5 | -11 | 47.19  | 2.57 |
| 3 | -5 | -11 | 41.72  | 2.05 |
| 3 | -5 | -10 | 209.66 | 5.84 |
| 3 | -5 | -10 | 211.68 | 5.13 |
| 3 | -5 | -10 | 224.26 | 5.30 |
| 3 | -5 | -9  | 148.82 | 4.97 |
| 3 | -5 | -9  | 144.55 | 4.16 |
| 3 | -5 | -9  | 155.85 | 4.50 |
| 3 | -5 | -8  | 188.02 | 5.43 |
| 3 | -5 | -8  | 165.67 | 5.82 |
| 3 | -5 | -8  | 178.44 | 5.76 |
| 3 | -5 | -8  | 176.75 | 5.81 |
| 3 | -5 | -8  | 181.08 | 5.55 |
| 3 | -5 | -8  | 181.24 | 4.75 |
| 3 | -5 | -7  | 84.50  | 3.47 |
| 3 | -5 | -7  | 81.92  | 3.80 |
| 3 | -5 | -7  | 81.79  | 3.70 |
| 3 | -5 | -7  | 84.94  | 3.79 |
| 3 | -5 | -7  | 75.42  | 3.42 |
| 3 | -5 | -7  | 80.74  | 3.17 |
| 3 | -5 | -7  | 76.68  | 2.98 |

## CIF 31

|   |    |    |         |       |
|---|----|----|---------|-------|
| 3 | -5 | -7 | 80.41   | 3.44  |
| 3 | -5 | -6 | 21.29   | 1.71  |
| 3 | -5 | -6 | 19.62   | 1.86  |
| 3 | -5 | -6 | 19.27   | 1.79  |
| 3 | -5 | -6 | 17.19   | 1.77  |
| 3 | -5 | -6 | 22.93   | 1.96  |
| 3 | -5 | -6 | 24.02   | 1.84  |
| 3 | -5 | -6 | 21.25   | 1.56  |
| 3 | -5 | -6 | 22.21   | 1.79  |
| 3 | -5 | -6 | 21.80   | 1.76  |
| 3 | -5 | -5 | 1033.15 | 12.16 |
| 3 | -5 | -5 | 1051.13 | 12.99 |
| 3 | -5 | -5 | 1101.92 | 14.56 |
| 3 | -5 | -5 | 1119.41 | 14.40 |
| 3 | -5 | -5 | 1106.57 | 14.39 |
| 3 | -5 | -5 | 1082.66 | 14.14 |
| 3 | -5 | -5 | 1131.70 | 13.85 |
| 3 | -5 | -5 | 1061.00 | 12.91 |
| 3 | -5 | -5 | 1022.85 | 12.78 |
| 3 | -5 | -5 | 1031.24 | 13.46 |
| 3 | -5 | -5 | 925.50  | 13.04 |
| 3 | -5 | -4 | 261.70  | 4.67  |
| 3 | -5 | -4 | 257.64  | 5.11  |
| 3 | -5 | -4 | 251.33  | 4.99  |
| 3 | -5 | -4 | 252.12  | 5.46  |
| 3 | -5 | -4 | 247.12  | 5.29  |
| 3 | -5 | -4 | 260.08  | 4.99  |
| 3 | -5 | -4 | 229.75  | 4.44  |
| 3 | -5 | -4 | 218.08  | 4.15  |
| 3 | -5 | -4 | 260.81  | 5.09  |
| 3 | -5 | -4 | 262.49  | 5.37  |
| 3 | -5 | -4 | 238.73  | 5.08  |
| 3 | -5 | -3 | 201.86  | 3.94  |
| 3 | -5 | -3 | 188.53  | 4.43  |
| 3 | -5 | -3 | 216.29  | 4.82  |
| 3 | -5 | -3 | 194.35  | 4.42  |
| 3 | -5 | -3 | 238.90  | 4.96  |
| 3 | -5 | -3 | 212.78  | 4.54  |
| 3 | -5 | -3 | 208.55  | 4.26  |
| 3 | -5 | -3 | 196.94  | 4.04  |
| 3 | -5 | -3 | 195.02  | 3.96  |

## CIF 31

|   |    |    |         |       |
|---|----|----|---------|-------|
| 3 | -5 | -3 | 213.39  | 4.66  |
| 3 | -5 | -3 | 205.27  | 4.51  |
| 3 | -5 | -3 | 194.93  | 4.37  |
| 3 | -5 | -2 | 1698.57 | 16.53 |
| 3 | -5 | -2 | 1465.71 | 15.60 |
| 3 | -5 | -2 | 1682.18 | 17.45 |
| 3 | -5 | -2 | 1481.10 | 17.08 |
| 3 | -5 | -2 | 1566.15 | 16.98 |
| 3 | -5 | -2 | 1629.04 | 17.15 |
| 3 | -5 | -2 | 1701.87 | 17.33 |
| 3 | -5 | -2 | 1672.86 | 17.29 |
| 3 | -5 | -2 | 1494.75 | 16.96 |
| 3 | -5 | -2 | 1944.33 | 17.88 |
| 3 | -5 | -2 | 1707.67 | 16.98 |
| 3 | -5 | -2 | 1638.67 | 16.76 |
| 3 | -5 | -2 | 1495.52 | 16.50 |
| 3 | -5 | -2 | 1621.49 | 17.02 |
| 3 | -5 | -1 | 3116.54 | 30.20 |
| 3 | -5 | -1 | 3414.35 | 31.21 |
| 3 | -5 | -1 | 3605.23 | 31.49 |
| 3 | -5 | -1 | 3614.74 | 31.48 |
| 3 | -5 | -1 | 3474.41 | 31.47 |
| 3 | -5 | -1 | 3306.48 | 30.98 |
| 3 | -5 | -1 | 3319.81 | 33.99 |
| 3 | -5 | -1 | 3404.78 | 31.14 |
| 3 | -5 | -1 | 3206.33 | 30.66 |
| 3 | -5 | -1 | 3321.30 | 30.71 |
| 3 | -5 | 0  | 118.90  | 2.94  |
| 3 | -5 | 0  | 118.01  | 4.05  |
| 3 | -5 | 0  | 111.50  | 3.06  |
| 3 | -5 | 1  | 482.19  | 6.75  |
| 3 | -5 | 1  | 455.40  | 6.17  |
| 3 | -5 | 1  | 412.40  | 8.13  |
| 3 | -5 | 1  | 455.15  | 6.96  |
| 3 | -5 | 1  | 507.69  | 6.69  |
| 3 | -5 | 1  | 450.45  | 5.82  |
| 3 | -5 | 2  | 401.17  | 5.37  |
| 3 | -5 | 2  | 389.03  | 5.09  |
| 3 | -5 | 3  | 1285.00 | 13.82 |
| 3 | -5 | 3  | 1149.74 | 11.25 |
| 3 | -5 | 3  | 1238.23 | 13.28 |

## CIF 31

|   |    |     |         |       |
|---|----|-----|---------|-------|
| 3 | -5 | 3   | 1335.57 | 13.43 |
| 3 | -5 | 3   | 1160.52 | 12.98 |
| 3 | -5 | 3   | 1145.99 | 13.73 |
| 3 | -5 | 3   | 1147.69 | 11.13 |
| 3 | -5 | 4   | 158.55  | 3.55  |
| 3 | -5 | 4   | 147.58  | 3.68  |
| 3 | -5 | 4   | 155.50  | 3.68  |
| 3 | -5 | 4   | 166.58  | 4.06  |
| 3 | -5 | 5   | 2.18    | 0.77  |
| 3 | -5 | 5   | 3.02    | 0.57  |
| 3 | -5 | 5   | 2.95    | 0.76  |
| 3 | -5 | 5   | 2.99    | 0.78  |
| 3 | -5 | 5   | 3.10    | 0.83  |
| 3 | -5 | 6   | 74.24   | 3.02  |
| 3 | -5 | 6   | 73.77   | 2.86  |
| 3 | -5 | 6   | 73.98   | 2.86  |
| 3 | -5 | 7   | 56.46   | 2.68  |
| 3 | -5 | 7   | 59.88   | 2.86  |
| 3 | -5 | 7   | 50.15   | 2.55  |
| 3 | -5 | 7   | 56.88   | 2.58  |
| 3 | -5 | 8   | 28.92   | 2.01  |
| 3 | -5 | 8   | 26.94   | 1.83  |
| 3 | -5 | 8   | 32.45   | 2.22  |
| 3 | -5 | 9   | 0.55    | 0.75  |
| 3 | -5 | 9   | 0.47    | 0.66  |
| 3 | -5 | 9   | 1.37    | 0.93  |
| 3 | -5 | 9   | 1.25    | 0.95  |
| 3 | -5 | 10  | 11.39   | 1.50  |
| 3 | -5 | 10  | 8.70    | 1.46  |
| 3 | -5 | 11  | 2.26    | 1.07  |
| 3 | -5 | 11  | 2.08    | 0.93  |
| 3 | -5 | 11  | 4.39    | 1.02  |
| 3 | -5 | 11  | 3.46    | 1.18  |
| 3 | -5 | 12  | 345.19  | 7.33  |
| 3 | -4 | -14 | 118.28  | 2.35  |
| 3 | -4 | -14 | 125.68  | 2.67  |
| 3 | -4 | -13 | 11.37   | 1.22  |
| 3 | -4 | -13 | 10.31   | 1.15  |
| 3 | -4 | -13 | 13.59   | 1.29  |
| 3 | -4 | -12 | 127.78  | 4.39  |
| 3 | -4 | -12 | 126.44  | 4.16  |

## CIF 31

|   |    |     |        |      |
|---|----|-----|--------|------|
| 3 | -4 | -12 | 151.34 | 4.09 |
| 3 | -4 | -12 | 149.31 | 3.44 |
| 3 | -4 | -12 | 134.68 | 4.23 |
| 3 | -4 | -12 | 132.77 | 3.32 |
| 3 | -4 | -11 | 319.91 | 7.28 |
| 3 | -4 | -11 | 313.76 | 5.83 |
| 3 | -4 | -11 | 343.58 | 6.87 |
| 3 | -4 | -11 | 284.68 | 7.31 |
| 3 | -4 | -11 | 295.99 | 5.75 |
| 3 | -4 | -11 | 323.08 | 6.21 |
| 3 | -4 | -10 | 228.31 | 6.18 |
| 3 | -4 | -10 | 237.10 | 5.36 |
| 3 | -4 | -10 | 241.38 | 5.89 |
| 3 | -4 | -9  | 0.92   | 0.87 |
| 3 | -4 | -9  | 2.83   | 1.02 |
| 3 | -4 | -9  | 1.63   | 1.02 |
| 3 | -4 | -9  | 0.86   | 0.79 |
| 3 | -4 | -9  | 1.02   | 0.66 |
| 3 | -4 | -8  | 503.10 | 9.44 |
| 3 | -4 | -8  | 441.40 | 9.34 |
| 3 | -4 | -8  | 471.18 | 9.56 |
| 3 | -4 | -8  | 502.44 | 9.67 |
| 3 | -4 | -8  | 470.64 | 8.77 |
| 3 | -4 | -8  | 486.27 | 8.95 |
| 3 | -4 | -7  | 290.31 | 5.91 |
| 3 | -4 | -7  | 312.98 | 6.80 |
| 3 | -4 | -7  | 262.91 | 6.72 |
| 3 | -4 | -7  | 266.40 | 6.59 |
| 3 | -4 | -7  | 243.90 | 6.29 |
| 3 | -4 | -7  | 290.67 | 6.83 |
| 3 | -4 | -7  | 314.32 | 6.93 |
| 3 | -4 | -7  | 291.16 | 6.30 |
| 3 | -4 | -7  | 281.73 | 5.57 |
| 3 | -4 | -7  | 293.07 | 6.53 |
| 3 | -4 | -7  | 314.01 | 6.53 |
| 3 | -4 | -6  | 83.90  | 2.80 |
| 3 | -4 | -6  | 88.96  | 3.33 |
| 3 | -4 | -6  | 80.93  | 3.31 |
| 3 | -4 | -6  | 82.07  | 3.27 |
| 3 | -4 | -6  | 77.61  | 3.23 |
| 3 | -4 | -6  | 82.38  | 3.20 |



## CIF 31

|   |    |    |         |       |
|---|----|----|---------|-------|
| 3 | -4 | -6 | 90.36   | 3.13  |
| 3 | -4 | -6 | 86.59   | 2.80  |
| 3 | -4 | -6 | 86.73   | 3.22  |
| 3 | -4 | -6 | 81.86   | 3.02  |
| 3 | -4 | -5 | 84.87   | 2.68  |
| 3 | -4 | -5 | 83.19   | 3.08  |
| 3 | -4 | -5 | 97.45   | 3.05  |
| 3 | -4 | -5 | 82.56   | 2.81  |
| 3 | -4 | -5 | 93.32   | 3.27  |
| 3 | -4 | -5 | 87.14   | 3.09  |
| 3 | -4 | -5 | 87.39   | 3.03  |
| 3 | -4 | -5 | 85.79   | 2.80  |
| 3 | -4 | -5 | 91.10   | 3.06  |
| 3 | -4 | -5 | 75.72   | 2.71  |
| 3 | -4 | -4 | 429.01  | 6.21  |
| 3 | -4 | -4 | 393.34  | 6.73  |
| 3 | -4 | -4 | 416.57  | 6.60  |
| 3 | -4 | -4 | 380.22  | 6.31  |
| 3 | -4 | -4 | 389.70  | 7.16  |
| 3 | -4 | -4 | 351.69  | 5.09  |
| 3 | -4 | -4 | 404.64  | 6.56  |
| 3 | -4 | -3 | 2182.47 | 21.39 |
| 3 | -4 | -3 | 2177.95 | 19.95 |
| 3 | -4 | -3 | 2367.98 | 22.29 |
| 3 | -4 | -3 | 2351.21 | 21.98 |
| 3 | -4 | -3 | 2265.39 | 21.03 |
| 3 | -4 | -3 | 2239.06 | 23.64 |
| 3 | -4 | -3 | 2128.97 | 20.81 |
| 3 | -4 | -3 | 2439.37 | 22.07 |
| 3 | -4 | -2 | 24.78   | 1.29  |
| 3 | -4 | -2 | 29.89   | 1.12  |
| 3 | -4 | -2 | 22.21   | 1.28  |
| 3 | -4 | -2 | 19.23   | 1.23  |
| 3 | -4 | -2 | 24.17   | 1.37  |
| 3 | -4 | -2 | 23.81   | 1.29  |
| 3 | -4 | -2 | 21.39   | 1.36  |
| 3 | -4 | -2 | 24.00   | 1.72  |
| 3 | -4 | -2 | 22.64   | 1.17  |
| 3 | -4 | -2 | 25.89   | 1.27  |
| 3 | -4 | -1 | 1104.56 | 10.88 |
| 3 | -4 | -1 | 1015.75 | 11.36 |

## CIF 31

|   |    |     |         |       |
|---|----|-----|---------|-------|
| 3 | -4 | -1  | 922.07  | 11.14 |
| 3 | -4 | -1  | 992.98  | 11.35 |
| 3 | -4 | -1  | 1063.41 | 11.63 |
| 3 | -4 | -1  | 1059.39 | 11.73 |
| 3 | -4 | -1  | 1091.80 | 13.36 |
| 3 | -4 | -1  | 1044.04 | 11.16 |
| 3 | -4 | -1  | 1134.80 | 11.06 |
| 3 | -4 | -1  | 995.63  | 11.31 |
| 3 | -4 | 0   | 1727.56 | 16.16 |
| 3 | -4 | 0   | 1690.82 | 16.34 |
| 3 | -4 | 1   | 1198.31 | 11.76 |
| 3 | -4 | 1   | 1185.35 | 12.49 |
| 3 | -4 | 2   | 4634.03 | 39.84 |
| 3 | -4 | 2   | 4646.24 | 40.41 |
| 3 | -4 | 3   | 253.70  | 3.47  |
| 3 | -4 | 3   | 279.12  | 5.75  |
| 3 | -4 | 3   | 278.83  | 4.42  |
| 3 | -4 | 3   | 268.94  | 4.79  |
| 3 | -4 | 3   | 250.89  | 3.00  |
| 3 | -4 | 4   | 407.49  | 7.22  |
| 3 | -4 | 4   | 399.28  | 6.29  |
| 3 | -4 | 5   | 692.23  | 9.41  |
| 3 | -4 | 5   | 750.64  | 9.01  |
| 3 | -4 | 5   | 639.11  | 8.09  |
| 3 | -4 | 5   | 704.11  | 9.58  |
| 3 | -4 | 5   | 660.57  | 9.13  |
| 3 | -4 | 6   | 245.83  | 5.26  |
| 3 | -4 | 6   | 257.01  | 5.19  |
| 3 | -4 | 7   | 46.02   | 2.49  |
| 3 | -4 | 7   | 42.88   | 2.10  |
| 3 | -4 | 8   | 568.08  | 9.05  |
| 3 | -4 | 8   | 577.68  | 10.23 |
| 3 | -4 | 9   | 56.18   | 3.04  |
| 3 | -4 | 9   | 66.61   | 3.21  |
| 3 | -4 | 10  | 18.95   | 1.88  |
| 3 | -4 | 11  | 29.12   | 2.24  |
| 3 | -4 | 11  | 27.81   | 2.09  |
| 3 | -4 | 11  | 22.69   | 1.83  |
| 3 | -4 | 12  | 120.00  | 3.96  |
| 3 | -3 | -14 | 16.76   | 1.25  |
| 3 | -3 | -14 | 18.74   | 1.14  |

## CIF 31

|   |    |     |        |       |
|---|----|-----|--------|-------|
| 3 | -3 | -14 | 14.95  | 0.86  |
| 3 | -3 | -14 | 15.19  | 1.23  |
| 3 | -3 | -13 | 94.42  | 3.28  |
| 3 | -3 | -13 | 93.05  | 3.39  |
| 3 | -3 | -13 | 98.78  | 3.07  |
| 3 | -3 | -13 | 82.47  | 3.48  |
| 3 | -3 | -13 | 82.07  | 2.63  |
| 3 | -3 | -12 | 754.36 | 12.04 |
| 3 | -3 | -12 | 747.69 | 11.85 |
| 3 | -3 | -12 | 723.76 | 12.87 |
| 3 | -3 | -12 | 729.51 | 10.28 |
| 3 | -3 | -12 | 745.39 | 9.93  |
| 3 | -3 | -11 | 484.32 | 9.46  |
| 3 | -3 | -11 | 481.36 | 8.57  |
| 3 | -3 | -11 | 479.73 | 10.65 |
| 3 | -3 | -10 | 135.31 | 4.65  |
| 3 | -3 | -10 | 128.21 | 5.03  |
| 3 | -3 | -9  | 2.81   | 0.90  |
| 3 | -3 | -9  | 3.77   | 1.15  |
| 3 | -3 | -9  | 4.61   | 1.26  |
| 3 | -3 | -9  | 2.63   | 1.05  |
| 3 | -3 | -9  | 2.96   | 0.75  |
| 3 | -3 | -9  | 2.88   | 1.07  |
| 3 | -3 | -8  | 692.63 | 10.73 |
| 3 | -3 | -8  | 756.58 | 11.98 |
| 3 | -3 | -8  | 730.56 | 11.86 |
| 3 | -3 | -8  | 723.85 | 11.42 |
| 3 | -3 | -8  | 746.73 | 11.12 |
| 3 | -3 | -8  | 717.53 | 10.48 |
| 3 | -3 | -7  | 70.77  | 2.80  |
| 3 | -3 | -7  | 80.91  | 3.29  |
| 3 | -3 | -7  | 80.01  | 3.38  |
| 3 | -3 | -7  | 76.32  | 3.21  |
| 3 | -3 | -7  | 76.05  | 3.10  |
| 3 | -3 | -7  | 77.04  | 3.08  |
| 3 | -3 | -7  | 73.53  | 3.07  |
| 3 | -3 | -6  | 12.24  | 1.18  |
| 3 | -3 | -6  | 9.63   | 1.23  |
| 3 | -3 | -6  | 9.89   | 1.19  |
| 3 | -3 | -6  | 10.62  | 1.22  |
| 3 | -3 | -6  | 10.33  | 1.18  |

## CIF 31

|   |    |    |        |       |
|---|----|----|--------|-------|
| 3 | -3 | -6 | 12.58  | 1.30  |
| 3 | -3 | -6 | 12.72  | 1.27  |
| 3 | -3 | -6 | 10.13  | 1.12  |
| 3 | -3 | -5 | 92.55  | 2.75  |
| 3 | -3 | -5 | 88.69  | 2.92  |
| 3 | -3 | -5 | 99.76  | 3.03  |
| 3 | -3 | -5 | 84.85  | 2.55  |
| 3 | -3 | -5 | 85.32  | 2.84  |
| 3 | -3 | -5 | 92.69  | 2.86  |
| 3 | -3 | -5 | 95.70  | 2.51  |
| 3 | -3 | -5 | 91.90  | 2.98  |
| 3 | -3 | -5 | 93.96  | 2.94  |
| 3 | -3 | -5 | 88.21  | 2.84  |
| 3 | -3 | -4 | 488.23 | 6.72  |
| 3 | -3 | -4 | 488.50 | 6.58  |
| 3 | -3 | -4 | 486.26 | 6.97  |
| 3 | -3 | -4 | 438.79 | 6.68  |
| 3 | -3 | -4 | 514.38 | 7.05  |
| 3 | -3 | -4 | 478.74 | 6.40  |
| 3 | -3 | -4 | 476.79 | 6.96  |
| 3 | -3 | -4 | 480.18 | 7.37  |
| 3 | -3 | -4 | 417.57 | 5.21  |
| 3 | -3 | -3 | 769.95 | 9.11  |
| 3 | -3 | -3 | 657.80 | 9.08  |
| 3 | -3 | -3 | 847.15 | 9.40  |
| 3 | -3 | -3 | 796.09 | 9.38  |
| 3 | -3 | -3 | 844.74 | 9.40  |
| 3 | -3 | -3 | 797.99 | 9.02  |
| 3 | -3 | -3 | 790.68 | 10.11 |
| 3 | -3 | -3 | 725.39 | 7.99  |
| 3 | -3 | -2 | 92.91  | 2.39  |
| 3 | -3 | -2 | 103.90 | 2.42  |
| 3 | -3 | -2 | 88.87  | 2.42  |
| 3 | -3 | -2 | 84.44  | 2.35  |
| 3 | -3 | -2 | 99.19  | 2.89  |
| 3 | -3 | -2 | 95.95  | 2.06  |
| 3 | -3 | -2 | 83.12  | 1.99  |
| 3 | -3 | -1 | 788.40 | 8.72  |
| 3 | -3 | -1 | 801.01 | 8.67  |
| 3 | -3 | -1 | 802.21 | 9.88  |
| 3 | -3 | 0  | 298.69 | 4.32  |

## CIF 31

|   |    |     |         |       |
|---|----|-----|---------|-------|
| 3 | -3 | 0   | 288.61  | 4.29  |
| 3 | -3 | 1   | 1730.15 | 16.40 |
| 3 | -3 | 1   | 1875.28 | 18.57 |
| 3 | -3 | 2   | 2647.75 | 23.76 |
| 3 | -3 | 2   | 2862.22 | 26.45 |
| 3 | -3 | 3   | 6.20    | 0.53  |
| 3 | -3 | 3   | 5.95    | 0.85  |
| 3 | -3 | 3   | 6.67    | 0.76  |
| 3 | -3 | 4   | 2819.40 | 26.77 |
| 3 | -3 | 4   | 2819.04 | 25.73 |
| 3 | -3 | 5   | 203.64  | 4.20  |
| 3 | -3 | 5   | 208.08  | 4.17  |
| 3 | -3 | 6   | 47.87   | 2.25  |
| 3 | -3 | 6   | 45.80   | 1.92  |
| 3 | -3 | 7   | 179.09  | 4.28  |
| 3 | -3 | 7   | 175.53  | 4.73  |
| 3 | -3 | 7   | 166.66  | 3.99  |
| 3 | -3 | 8   | 381.17  | 6.73  |
| 3 | -3 | 8   | 371.50  | 7.64  |
| 3 | -3 | 9   | 383.47  | 8.29  |
| 3 | -3 | 9   | 407.67  | 8.07  |
| 3 | -3 | 10  | 747.03  | 11.74 |
| 3 | -3 | 11  | 28.96   | 2.03  |
| 3 | -3 | 11  | 26.02   | 1.98  |
| 3 | -2 | -15 | 4.01    | 0.60  |
| 3 | -2 | -15 | 4.23    | 0.47  |
| 3 | -2 | -14 | 51.45   | 1.90  |
| 3 | -2 | -14 | 55.63   | 2.06  |
| 3 | -2 | -13 | 1.23    | 0.83  |
| 3 | -2 | -13 | 1.79    | 0.90  |
| 3 | -2 | -13 | 1.68    | 0.87  |
| 3 | -2 | -13 | 1.28    | 1.15  |
| 3 | -2 | -12 | 96.96   | 3.83  |
| 3 | -2 | -12 | 95.43   | 3.96  |
| 3 | -2 | -12 | 86.32   | 3.25  |
| 3 | -2 | -12 | 89.51   | 4.47  |
| 3 | -2 | -11 | 2.48    | 1.16  |
| 3 | -2 | -11 | 2.47    | 1.08  |
| 3 | -2 | -11 | 2.20    | 1.35  |
| 3 | -2 | -11 | 2.90    | 1.26  |
| 3 | -2 | -10 | 270.03  | 6.66  |

## CIF 31

|   |    |     |         |       |
|---|----|-----|---------|-------|
| 3 | -2 | -10 | 259.15  | 6.88  |
| 3 | -2 | -10 | 285.65  | 7.78  |
| 3 | -2 | -10 | 246.01  | 7.00  |
| 3 | -2 | -10 | 271.55  | 6.64  |
| 3 | -2 | -9  | 55.64   | 2.94  |
| 3 | -2 | -9  | 56.03   | 2.83  |
| 3 | -2 | -9  | 57.07   | 3.06  |
| 3 | -2 | -9  | 59.52   | 3.33  |
| 3 | -2 | -9  | 57.55   | 3.21  |
| 3 | -2 | -9  | 60.95   | 3.25  |
| 3 | -2 | -9  | 53.77   | 2.15  |
| 3 | -2 | -9  | 60.66   | 2.98  |
| 3 | -2 | -8  | 178.85  | 4.98  |
| 3 | -2 | -8  | 195.75  | 5.25  |
| 3 | -2 | -8  | 202.66  | 4.98  |
| 3 | -2 | -8  | 199.50  | 5.60  |
| 3 | -2 | -8  | 168.20  | 5.03  |
| 3 | -2 | -8  | 204.79  | 5.59  |
| 3 | -2 | -8  | 205.98  | 5.56  |
| 3 | -2 | -8  | 179.53  | 4.49  |
| 3 | -2 | -8  | 161.97  | 4.50  |
| 3 | -2 | -8  | 180.41  | 4.59  |
| 3 | -2 | -7  | 86.33   | 3.16  |
| 3 | -2 | -7  | 79.26   | 2.82  |
| 3 | -2 | -7  | 96.79   | 3.57  |
| 3 | -2 | -7  | 101.13  | 3.44  |
| 3 | -2 | -7  | 83.69   | 3.23  |
| 3 | -2 | -7  | 86.17   | 3.29  |
| 3 | -2 | -7  | 95.22   | 3.45  |
| 3 | -2 | -7  | 75.08   | 2.79  |
| 3 | -2 | -7  | 87.05   | 2.87  |
| 3 | -2 | -7  | 70.88   | 2.95  |
| 3 | -2 | -7  | 74.53   | 2.78  |
| 3 | -2 | -6  | 1756.86 | 18.68 |
| 3 | -2 | -6  | 1677.17 | 18.31 |
| 3 | -2 | -6  | 1879.06 | 19.72 |
| 3 | -2 | -6  | 1928.29 | 19.29 |
| 3 | -2 | -6  | 1790.00 | 18.90 |
| 3 | -2 | -6  | 1908.38 | 19.36 |
| 3 | -2 | -6  | 1846.67 | 19.32 |
| 3 | -2 | -6  | 1812.17 | 18.92 |

## CIF 31

|   |    |    |         |       |
|---|----|----|---------|-------|
| 3 | -2 | -6 | 1819.41 | 16.50 |
| 3 | -2 | -6 | 1764.24 | 18.11 |
| 3 | -2 | -6 | 1622.86 | 17.48 |
| 3 | -2 | -5 | 246.77  | 4.77  |
| 3 | -2 | -5 | 260.80  | 4.65  |
| 3 | -2 | -5 | 254.30  | 3.78  |
| 3 | -2 | -5 | 232.87  | 4.53  |
| 3 | -2 | -5 | 241.43  | 4.72  |
| 3 | -2 | -5 | 225.76  | 4.49  |
| 3 | -2 | -5 | 216.17  | 4.60  |
| 3 | -2 | -5 | 252.32  | 4.36  |
| 3 | -2 | -5 | 278.15  | 4.99  |
| 3 | -2 | -5 | 262.22  | 4.58  |
| 3 | -2 | -5 | 241.56  | 4.47  |
| 3 | -2 | -4 | 578.90  | 7.36  |
| 3 | -2 | -4 | 554.98  | 7.01  |
| 3 | -2 | -4 | 554.53  | 7.24  |
| 3 | -2 | -4 | 509.34  | 7.03  |
| 3 | -2 | -4 | 573.73  | 7.23  |
| 3 | -2 | -4 | 565.94  | 7.39  |
| 3 | -2 | -4 | 572.73  | 7.27  |
| 3 | -2 | -4 | 576.76  | 7.48  |
| 3 | -2 | -4 | 522.32  | 5.50  |
| 3 | -2 | -3 | 1604.81 | 15.64 |
| 3 | -2 | -3 | 1547.46 | 15.01 |
| 3 | -2 | -3 | 1582.79 | 15.56 |
| 3 | -2 | -3 | 1729.33 | 15.48 |
| 3 | -2 | -3 | 1571.08 | 15.47 |
| 3 | -2 | -3 | 1608.34 | 15.66 |
| 3 | -2 | -3 | 1611.13 | 15.78 |
| 3 | -2 | -3 | 1797.69 | 16.41 |
| 3 | -2 | -3 | 1597.40 | 14.19 |
| 3 | -2 | -3 | 1346.04 | 14.05 |
| 3 | -2 | -1 | 85.35   | 1.62  |
| 3 | -2 | -1 | 79.38   | 1.98  |
| 3 | -2 | -1 | 97.03   | 2.17  |
| 3 | -2 | -1 | 92.23   | 2.45  |
| 3 | -2 | -1 | 93.12   | 2.26  |
| 3 | -2 | 0  | 3200.38 | 26.79 |
| 3 | -2 | 0  | 3217.00 | 28.03 |
| 3 | -2 | 1  | 61.10   | 1.05  |

## CIF 31

|   |    |     |         |       |
|---|----|-----|---------|-------|
| 3 | -2 | 1   | 64.89   | 1.64  |
| 3 | -2 | 1   | 66.07   | 1.82  |
| 3 | -2 | 2   | 2991.20 | 24.53 |
| 3 | -2 | 2   | 3065.22 | 27.18 |
| 3 | -2 | 2   | 3048.29 | 26.25 |
| 3 | -2 | 3   | 8.34    | 0.87  |
| 3 | -2 | 3   | 11.58   | 0.84  |
| 3 | -2 | 4   | 1533.28 | 15.69 |
| 3 | -2 | 4   | 1520.55 | 15.12 |
| 3 | -2 | 5   | 26.57   | 1.53  |
| 3 | -2 | 5   | 20.00   | 1.17  |
| 3 | -2 | 6   | 51.74   | 2.27  |
| 3 | -2 | 6   | 48.82   | 1.91  |
| 3 | -2 | 7   | 68.22   | 2.44  |
| 3 | -2 | 7   | 72.17   | 2.89  |
| 3 | -2 | 7   | 66.26   | 2.28  |
| 3 | -2 | 8   | 1.06    | 0.60  |
| 3 | -2 | 8   | 4.57    | 0.87  |
| 3 | -2 | 9   | 165.92  | 5.13  |
| 3 | -2 | 9   | 177.16  | 4.97  |
| 3 | -2 | 10  | 125.64  | 4.03  |
| 3 | -2 | 11  | 28.95   | 1.83  |
| 3 | -1 | -15 | 256.15  | 4.93  |
| 3 | -1 | -15 | 285.47  | 4.51  |
| 3 | -1 | -14 | 41.50   | 2.33  |
| 3 | -1 | -13 | 369.08  | 7.84  |
| 3 | -1 | -13 | 354.92  | 9.09  |
| 3 | -1 | -12 | 45.67   | 3.14  |
| 3 | -1 | -12 | 54.30   | 3.09  |
| 3 | -1 | -12 | 53.62   | 2.52  |
| 3 | -1 | -12 | 48.50   | 3.62  |
| 3 | -1 | -12 | 56.77   | 3.03  |
| 3 | -1 | -11 | 1537.81 | 20.03 |
| 3 | -1 | -11 | 1523.67 | 22.20 |
| 3 | -1 | -10 | 24.76   | 2.06  |
| 3 | -1 | -10 | 24.16   | 2.38  |
| 3 | -1 | -10 | 24.61   | 2.31  |
| 3 | -1 | -10 | 28.47   | 2.48  |
| 3 | -1 | -10 | 23.15   | 1.95  |
| 3 | -1 | -10 | 27.19   | 2.12  |
| 3 | -1 | -9  | 123.21  | 4.40  |



## CIF 31

|   |    |    |        |      |
|---|----|----|--------|------|
| 3 | -1 | -9 | 112.52 | 3.91 |
| 3 | -1 | -9 | 114.20 | 4.41 |
| 3 | -1 | -9 | 106.77 | 4.42 |
| 3 | -1 | -9 | 112.17 | 4.39 |
| 3 | -1 | -9 | 109.13 | 4.36 |
| 3 | -1 | -9 | 111.24 | 3.99 |
| 3 | -1 | -9 | 108.90 | 3.84 |
| 3 | -1 | -9 | 114.77 | 3.71 |
| 3 | -1 | -8 | 105.28 | 3.77 |
| 3 | -1 | -8 | 85.53  | 2.91 |
| 3 | -1 | -8 | 93.92  | 3.26 |
| 3 | -1 | -8 | 91.70  | 3.33 |
| 3 | -1 | -8 | 101.72 | 3.85 |
| 3 | -1 | -8 | 102.65 | 3.92 |
| 3 | -1 | -8 | 75.75  | 3.44 |
| 3 | -1 | -8 | 86.57  | 3.57 |
| 3 | -1 | -8 | 93.24  | 3.34 |
| 3 | -1 | -8 | 85.60  | 3.09 |
| 3 | -1 | -8 | 94.28  | 3.22 |
| 3 | -1 | -7 | 1.07   | 0.65 |
| 3 | -1 | -7 | 1.58   | 0.83 |
| 3 | -1 | -7 | 1.53   | 0.47 |
| 3 | -1 | -7 | 1.22   | 0.90 |
| 3 | -1 | -7 | 1.55   | 0.54 |
| 3 | -1 | -7 | 1.45   | 0.62 |
| 3 | -1 | -7 | 2.95   | 0.69 |
| 3 | -1 | -7 | 1.37   | 0.69 |
| 3 | -1 | -7 | 2.01   | 0.81 |
| 3 | -1 | -7 | 1.03   | 0.63 |
| 3 | -1 | -7 | 2.42   | 0.84 |
| 3 | -1 | -7 | 1.45   | 0.62 |
| 3 | -1 | -7 | 1.64   | 0.76 |
| 3 | -1 | -7 | 1.58   | 0.60 |
| 3 | -1 | -6 | 46.73  | 2.12 |
| 3 | -1 | -6 | 44.14  | 1.66 |
| 3 | -1 | -6 | 44.60  | 1.88 |
| 3 | -1 | -6 | 47.10  | 2.22 |
| 3 | -1 | -6 | 42.57  | 2.00 |
| 3 | -1 | -6 | 46.56  | 2.14 |
| 3 | -1 | -6 | 49.00  | 1.48 |
| 3 | -1 | -6 | 47.41  | 2.04 |

## CIF 31

|   |    |    |         |       |
|---|----|----|---------|-------|
| 3 | -1 | -6 | 44.65   | 1.68  |
| 3 | -1 | -5 | 438.33  | 6.53  |
| 3 | -1 | -5 | 445.58  | 6.21  |
| 3 | -1 | -5 | 456.73  | 6.25  |
| 3 | -1 | -5 | 401.67  | 6.38  |
| 3 | -1 | -5 | 412.88  | 6.26  |
| 3 | -1 | -5 | 448.53  | 6.65  |
| 3 | -1 | -5 | 452.33  | 6.60  |
| 3 | -1 | -5 | 427.59  | 6.56  |
| 3 | -1 | -5 | 436.85  | 5.59  |
| 3 | -1 | -5 | 436.76  | 6.51  |
| 3 | -1 | -5 | 412.55  | 5.58  |
| 3 | -1 | -5 | 440.86  | 6.07  |
| 3 | -1 | -4 | 3559.17 | 34.56 |
| 3 | -1 | -4 | 4009.50 | 34.45 |
| 3 | -1 | -4 | 3733.22 | 34.32 |
| 3 | -1 | -4 | 3891.92 | 34.78 |
| 3 | -1 | -4 | 4207.27 | 34.48 |
| 3 | -1 | -4 | 4119.78 | 34.76 |
| 3 | -1 | -4 | 3720.00 | 34.82 |
| 3 | -1 | -4 | 3930.96 | 34.18 |
| 3 | -1 | -4 | 3970.85 | 34.02 |
| 3 | -1 | -4 | 4170.28 | 35.12 |
| 3 | -1 | -4 | 4362.00 | 34.76 |
| 3 | -1 | -3 | 272.50  | 4.09  |
| 3 | -1 | -3 | 282.42  | 4.27  |
| 3 | -1 | -3 | 304.82  | 4.37  |
| 3 | -1 | -3 | 243.22  | 4.21  |
| 3 | -1 | -3 | 272.88  | 3.96  |
| 3 | -1 | -3 | 298.58  | 4.77  |
| 3 | -1 | -3 | 303.18  | 4.36  |
| 3 | -1 | -3 | 280.92  | 4.51  |
| 3 | -1 | -2 | 39.29   | 1.39  |
| 3 | -1 | -2 | 38.37   | 1.38  |
| 3 | -1 | -2 | 37.46   | 1.13  |
| 3 | -1 | -2 | 40.55   | 1.52  |
| 3 | -1 | -2 | 40.30   | 0.78  |
| 3 | -1 | 0  | 2584.03 | 21.20 |
| 3 | -1 | 0  | 2482.10 | 20.70 |
| 3 | -1 | 1  | 434.70  | 4.61  |
| 3 | -1 | 1  | 414.86  | 5.52  |

## CIF 31

|   |    |     |        |       |
|---|----|-----|--------|-------|
| 3 | -1 | 1   | 438.07 | 4.49  |
| 3 | -1 | 1   | 448.85 | 5.91  |
| 3 | -1 | 1   | 428.99 | 5.59  |
| 3 | -1 | 1   | 413.29 | 4.09  |
| 3 | -1 | 2   | 607.91 | 7.21  |
| 3 | -1 | 2   | 626.63 | 7.56  |
| 3 | -1 | 2   | 612.63 | 7.37  |
| 3 | -1 | 3   | 658.32 | 7.94  |
| 3 | -1 | 3   | 715.34 | 8.47  |
| 3 | -1 | 4   | 610.11 | 7.13  |
| 3 | -1 | 4   | 659.56 | 7.93  |
| 3 | -1 | 5   | 759.19 | 10.28 |
| 3 | -1 | 6   | 311.30 | 5.86  |
| 3 | -1 | 7   | 4.38   | 0.79  |
| 3 | -1 | 7   | 3.76   | 0.70  |
| 3 | -1 | 7   | 5.74   | 0.89  |
| 3 | -1 | 7   | 4.25   | 0.79  |
| 3 | -1 | 8   | 10.00  | 1.21  |
| 3 | -1 | 8   | 9.03   | 1.12  |
| 3 | -1 | 8   | 12.50  | 1.28  |
| 3 | -1 | 9   | 182.76 | 4.94  |
| 3 | 0  | -15 | 8.15   | 1.08  |
| 3 | 0  | -14 | 6.89   | 1.23  |
| 3 | 0  | -14 | 4.45   | 1.37  |
| 3 | 0  | -14 | 5.43   | 1.16  |
| 3 | 0  | -13 | 213.88 | 6.69  |
| 3 | 0  | -13 | 222.65 | 6.16  |
| 3 | 0  | -13 | 229.83 | 7.55  |
| 3 | 0  | -13 | 220.20 | 5.83  |
| 3 | 0  | -12 | 658.82 | 12.86 |
| 3 | 0  | -12 | 662.62 | 11.54 |
| 3 | 0  | -12 | 644.60 | 9.43  |
| 3 | 0  | -12 | 604.56 | 13.12 |
| 3 | 0  | -12 | 602.40 | 10.67 |
| 3 | 0  | -11 | 30.31  | 2.77  |
| 3 | 0  | -11 | 31.79  | 2.42  |
| 3 | 0  | -11 | 32.90  | 2.93  |
| 3 | 0  | -11 | 32.39  | 2.51  |
| 3 | 0  | -10 | 375.85 | 8.06  |
| 3 | 0  | -10 | 368.01 | 7.87  |
| 3 | 0  | -10 | 381.63 | 9.17  |

## CIF 31

|   |   |     |         |       |
|---|---|-----|---------|-------|
| 3 | 0 | -10 | 397.80  | 9.17  |
| 3 | 0 | -10 | 338.94  | 8.60  |
| 3 | 0 | -10 | 362.66  | 8.17  |
| 3 | 0 | -10 | 391.14  | 7.77  |
| 3 | 0 | -9  | 443.60  | 8.94  |
| 3 | 0 | -9  | 464.51  | 8.39  |
| 3 | 0 | -9  | 483.14  | 9.66  |
| 3 | 0 | -9  | 466.30  | 8.77  |
| 3 | 0 | -9  | 430.90  | 9.07  |
| 3 | 0 | -9  | 408.28  | 8.52  |
| 3 | 0 | -9  | 427.59  | 7.75  |
| 3 | 0 | -9  | 419.10  | 7.80  |
| 3 | 0 | -8  | 0.55    | 0.85  |
| 3 | 0 | -8  | 2.42    | 0.62  |
| 3 | 0 | -8  | 0.94    | 0.81  |
| 3 | 0 | -8  | 3.45    | 0.74  |
| 3 | 0 | -8  | 1.38    | 0.83  |
| 3 | 0 | -8  | 0.63    | 0.40  |
| 3 | 0 | -8  | 1.05    | 0.66  |
| 3 | 0 | -8  | 0.62    | 0.75  |
| 3 | 0 | -8  | 0.90    | 0.75  |
| 3 | 0 | -8  | 1.94    | 0.77  |
| 3 | 0 | -8  | 2.35    | 0.76  |
| 3 | 0 | -7  | 106.42  | 3.53  |
| 3 | 0 | -7  | 96.45   | 3.13  |
| 3 | 0 | -7  | 100.22  | 2.94  |
| 3 | 0 | -7  | 96.93   | 2.70  |
| 3 | 0 | -7  | 83.61   | 2.55  |
| 3 | 0 | -7  | 103.65  | 3.09  |
| 3 | 0 | -7  | 104.07  | 3.37  |
| 3 | 0 | -7  | 100.49  | 3.18  |
| 3 | 0 | -7  | 111.18  | 3.72  |
| 3 | 0 | -7  | 99.31   | 3.40  |
| 3 | 0 | -7  | 127.75  | 3.94  |
| 3 | 0 | -7  | 110.93  | 3.52  |
| 3 | 0 | -7  | 119.07  | 3.49  |
| 3 | 0 | -6  | 2083.05 | 21.48 |
| 3 | 0 | -6  | 1939.84 | 20.72 |
| 3 | 0 | -6  | 2170.30 | 20.88 |
| 3 | 0 | -6  | 2069.10 | 20.03 |
| 3 | 0 | -6  | 2182.72 | 21.38 |

## CIF 31

|   |   |    |         |       |
|---|---|----|---------|-------|
| 3 | 0 | -6 | 2044.75 | 21.32 |
| 3 | 0 | -6 | 2113.25 | 21.10 |
| 3 | 0 | -6 | 2219.43 | 21.70 |
| 3 | 0 | -6 | 2127.03 | 19.36 |
| 3 | 0 | -6 | 2047.11 | 20.12 |
| 3 | 0 | -6 | 2038.11 | 19.81 |
| 3 | 0 | -5 | 144.28  | 3.45  |
| 3 | 0 | -5 | 123.93  | 2.80  |
| 3 | 0 | -5 | 136.67  | 3.35  |
| 3 | 0 | -5 | 132.57  | 3.55  |
| 3 | 0 | -5 | 141.39  | 3.28  |
| 3 | 0 | -5 | 140.47  | 3.48  |
| 3 | 0 | -5 | 128.86  | 2.87  |
| 3 | 0 | -5 | 137.95  | 3.20  |
| 3 | 0 | -5 | 128.96  | 3.21  |
| 3 | 0 | -5 | 155.18  | 3.61  |
| 3 | 0 | -5 | 129.04  | 2.67  |
| 3 | 0 | -5 | 138.46  | 3.09  |
| 3 | 0 | -5 | 144.74  | 3.03  |
| 3 | 0 | -4 | 698.53  | 9.17  |
| 3 | 0 | -4 | 713.34  | 10.21 |
| 3 | 0 | -4 | 789.91  | 8.98  |
| 3 | 0 | -4 | 891.51  | 9.50  |
| 3 | 0 | -4 | 838.11  | 10.14 |
| 3 | 0 | -4 | 967.31  | 9.94  |
| 3 | 0 | -4 | 811.76  | 9.24  |
| 3 | 0 | -4 | 871.09  | 10.05 |
| 3 | 0 | -4 | 805.65  | 9.06  |
| 3 | 0 | -4 | 862.10  | 9.37  |
| 3 | 0 | -3 | 62.66   | 1.88  |
| 3 | 0 | -3 | 66.22   | 2.38  |
| 3 | 0 | -3 | 67.87   | 1.87  |
| 3 | 0 | -3 | 66.54   | 1.82  |
| 3 | 0 | -3 | 66.82   | 1.87  |
| 3 | 0 | -3 | 63.65   | 1.75  |
| 3 | 0 | -3 | 68.61   | 1.92  |
| 3 | 0 | -3 | 69.09   | 1.98  |
| 3 | 0 | -2 | 843.50  | 9.21  |
| 3 | 0 | -2 | 833.94  | 8.95  |
| 3 | 0 | -2 | 855.67  | 9.07  |
| 3 | 0 | -2 | 829.68  | 8.45  |

## CIF 31

|   |   |     |         |       |
|---|---|-----|---------|-------|
| 3 | 0 | -2  | 827.35  | 8.95  |
| 3 | 0 | -2  | 908.04  | 9.83  |
| 3 | 0 | -2  | 869.71  | 9.42  |
| 3 | 0 | -2  | 866.76  | 8.83  |
| 3 | 0 | -2  | 879.30  | 9.05  |
| 3 | 0 | -1  | 1.67    | 0.42  |
| 3 | 0 | -1  | 1.63    | 0.48  |
| 3 | 0 | -1  | 1.55    | 0.30  |
| 3 | 0 | -1  | 1.88    | 0.41  |
| 3 | 0 | -1  | 1.49    | 0.53  |
| 3 | 0 | 0   | 1733.37 | 14.00 |
| 3 | 0 | 0   | 1671.41 | 14.57 |
| 3 | 0 | 0   | 1879.84 | 15.81 |
| 3 | 0 | 0   | 1826.95 | 14.55 |
| 3 | 0 | 0   | 1908.21 | 16.02 |
| 3 | 0 | 1   | 90.67   | 1.90  |
| 3 | 0 | 1   | 92.58   | 2.28  |
| 3 | 0 | 1   | 95.70   | 2.38  |
| 3 | 0 | 1   | 89.76   | 1.65  |
| 3 | 0 | 2   | 5399.37 | 45.86 |
| 3 | 0 | 2   | 5078.56 | 44.96 |
| 3 | 0 | 2   | 5507.78 | 45.56 |
| 3 | 0 | 2   | 5132.96 | 44.54 |
| 3 | 0 | 3   | 2953.28 | 27.67 |
| 3 | 0 | 3   | 3354.85 | 28.48 |
| 3 | 0 | 4   | 1704.88 | 16.06 |
| 3 | 0 | 4   | 1750.01 | 16.80 |
| 3 | 0 | 5   | 156.40  | 3.65  |
| 3 | 0 | 6   | 131.00  | 3.53  |
| 3 | 0 | 6   | 135.08  | 3.47  |
| 3 | 0 | 6   | 139.03  | 3.69  |
| 3 | 0 | 7   | 51.86   | 2.35  |
| 3 | 0 | 7   | 55.83   | 2.34  |
| 3 | 0 | 7   | 55.90   | 2.49  |
| 3 | 0 | 8   | 2.65    | 0.75  |
| 3 | 0 | 9   | 205.25  | 4.77  |
| 3 | 1 | -16 | 23.04   | 1.09  |
| 3 | 1 | -16 | 22.06   | 1.14  |
| 3 | 1 | -15 | 395.47  | 7.12  |
| 3 | 1 | -15 | 435.06  | 7.00  |
| 3 | 1 | -14 | 37.32   | 2.76  |

## CIF 31

|   |   |     |         |       |
|---|---|-----|---------|-------|
| 3 | 1 | -14 | 37.09   | 2.40  |
| 3 | 1 | -14 | 37.87   | 3.02  |
| 3 | 1 | -14 | 39.16   | 2.37  |
| 3 | 1 | -13 | 152.58  | 5.98  |
| 3 | 1 | -13 | 157.94  | 5.37  |
| 3 | 1 | -13 | 159.82  | 6.37  |
| 3 | 1 | -12 | 2.47    | 1.41  |
| 3 | 1 | -12 | 2.11    | 1.07  |
| 3 | 1 | -12 | 2.65    | 1.01  |
| 3 | 1 | -12 | 2.48    | 1.07  |
| 3 | 1 | -12 | 3.54    | 1.18  |
| 3 | 1 | -11 | 1027.75 | 17.22 |
| 3 | 1 | -11 | 1034.38 | 16.05 |
| 3 | 1 | -11 | 961.75  | 14.59 |
| 3 | 1 | -11 | 1025.77 | 15.09 |
| 3 | 1 | -11 | 947.38  | 15.73 |
| 3 | 1 | -11 | 1116.80 | 14.79 |
| 3 | 1 | -10 | 1608.18 | 20.65 |
| 3 | 1 | -10 | 1348.45 | 17.75 |
| 3 | 1 | -10 | 1572.87 | 21.36 |
| 3 | 1 | -10 | 1486.17 | 19.05 |
| 3 | 1 | -10 | 1378.69 | 20.89 |
| 3 | 1 | -10 | 1502.06 | 20.41 |
| 3 | 1 | -10 | 1634.31 | 18.78 |
| 3 | 1 | -9  | 526.27  | 8.84  |
| 3 | 1 | -9  | 480.97  | 8.44  |
| 3 | 1 | -9  | 509.15  | 10.26 |
| 3 | 1 | -9  | 512.03  | 9.18  |
| 3 | 1 | -9  | 487.72  | 8.72  |
| 3 | 1 | -9  | 478.42  | 8.58  |
| 3 | 1 | -9  | 508.57  | 10.05 |
| 3 | 1 | -9  | 491.34  | 9.54  |
| 3 | 1 | -9  | 441.23  | 7.95  |
| 3 | 1 | -8  | 137.50  | 4.04  |
| 3 | 1 | -8  | 137.16  | 3.98  |
| 3 | 1 | -8  | 103.60  | 3.85  |
| 3 | 1 | -8  | 146.83  | 4.14  |
| 3 | 1 | -8  | 133.56  | 4.25  |
| 3 | 1 | -8  | 151.14  | 4.94  |
| 3 | 1 | -8  | 138.12  | 4.10  |
| 3 | 1 | -8  | 155.52  | 4.82  |

## CIF 31

|   |   |    |        |      |
|---|---|----|--------|------|
| 3 | 1 | -8 | 136.67 | 4.19 |
| 3 | 1 | -8 | 146.28 | 4.59 |
| 3 | 1 | -8 | 155.25 | 3.94 |
| 3 | 1 | -8 | 119.24 | 3.51 |
| 3 | 1 | -7 | 623.02 | 8.73 |
| 3 | 1 | -7 | 563.01 | 8.59 |
| 3 | 1 | -7 | 559.62 | 7.21 |
| 3 | 1 | -7 | 601.41 | 8.55 |
| 3 | 1 | -7 | 553.00 | 8.90 |
| 3 | 1 | -7 | 592.92 | 8.90 |
| 3 | 1 | -7 | 559.80 | 9.12 |
| 3 | 1 | -7 | 585.12 | 9.08 |
| 3 | 1 | -7 | 579.89 | 8.92 |
| 3 | 1 | -7 | 591.92 | 9.26 |
| 3 | 1 | -7 | 624.54 | 9.45 |
| 3 | 1 | -7 | 576.79 | 8.24 |
| 3 | 1 | -7 | 529.16 | 8.56 |
| 3 | 1 | -6 | 273.47 | 5.43 |
| 3 | 1 | -6 | 287.59 | 5.21 |
| 3 | 1 | -6 | 273.79 | 5.34 |
| 3 | 1 | -6 | 273.54 | 4.40 |
| 3 | 1 | -6 | 295.27 | 5.72 |
| 3 | 1 | -6 | 242.50 | 5.08 |
| 3 | 1 | -6 | 271.04 | 4.90 |
| 3 | 1 | -6 | 266.61 | 5.38 |
| 3 | 1 | -6 | 265.26 | 5.44 |
| 3 | 1 | -6 | 273.87 | 4.37 |
| 3 | 1 | -6 | 261.10 | 4.99 |
| 3 | 1 | -6 | 287.55 | 4.77 |
| 3 | 1 | -5 | 497.45 | 7.03 |
| 3 | 1 | -5 | 504.80 | 7.54 |
| 3 | 1 | -5 | 411.40 | 6.38 |
| 3 | 1 | -5 | 416.56 | 5.80 |
| 3 | 1 | -5 | 448.47 | 6.43 |
| 3 | 1 | -5 | 513.28 | 7.58 |
| 3 | 1 | -5 | 424.47 | 6.47 |
| 3 | 1 | -5 | 465.06 | 7.16 |
| 3 | 1 | -5 | 474.06 | 6.86 |
| 3 | 1 | -5 | 464.47 | 6.89 |
| 3 | 1 | -5 | 448.77 | 6.65 |
| 3 | 1 | -5 | 449.96 | 7.11 |



## CIF 31

|   |   |    |         |       |
|---|---|----|---------|-------|
| 3 | 1 | -5 | 432.78  | 6.05  |
| 3 | 1 | -5 | 484.19  | 6.95  |
| 3 | 1 | -4 | 3362.83 | 30.51 |
| 3 | 1 | -4 | 3169.19 | 31.84 |
| 3 | 1 | -4 | 3369.52 | 29.66 |
| 3 | 1 | -4 | 2946.12 | 29.89 |
| 3 | 1 | -4 | 3266.19 | 30.57 |
| 3 | 1 | -4 | 3014.25 | 31.53 |
| 3 | 1 | -4 | 3600.64 | 30.21 |
| 3 | 1 | -4 | 3449.28 | 30.34 |
| 3 | 1 | -4 | 3451.00 | 30.39 |
| 3 | 1 | -4 | 3750.38 | 30.41 |
| 3 | 1 | -4 | 3421.68 | 30.98 |
| 3 | 1 | -3 | 1319.66 | 12.68 |
| 3 | 1 | -3 | 995.94  | 13.81 |
| 3 | 1 | -3 | 1295.34 | 12.37 |
| 3 | 1 | -3 | 1198.85 | 12.17 |
| 3 | 1 | -3 | 1119.55 | 13.20 |
| 3 | 1 | -3 | 1310.28 | 12.41 |
| 3 | 1 | -3 | 1242.94 | 13.24 |
| 3 | 1 | -3 | 1164.89 | 12.38 |
| 3 | 1 | -3 | 1240.66 | 12.71 |
| 3 | 1 | -3 | 1198.67 | 11.89 |
| 3 | 1 | -2 | 897.49  | 9.05  |
| 3 | 1 | -2 | 863.48  | 9.23  |
| 3 | 1 | -2 | 829.99  | 7.82  |
| 3 | 1 | -2 | 776.10  | 9.55  |
| 3 | 1 | -2 | 831.51  | 9.44  |
| 3 | 1 | -2 | 856.48  | 9.09  |
| 3 | 1 | -2 | 797.45  | 8.65  |
| 3 | 1 | -2 | 875.94  | 9.02  |
| 3 | 1 | -1 | 952.51  | 9.83  |
| 3 | 1 | -1 | 968.76  | 10.21 |
| 3 | 1 | -1 | 964.99  | 8.76  |
| 3 | 1 | -1 | 952.21  | 10.00 |
| 3 | 1 | 0  | 1387.29 | 12.69 |
| 3 | 1 | 0  | 1358.86 | 12.68 |
| 3 | 1 | 0  | 1412.39 | 13.81 |
| 3 | 1 | 0  | 1365.59 | 13.06 |
| 3 | 1 | 0  | 1380.14 | 13.26 |
| 3 | 1 | 1  | 101.47  | 1.78  |

## CIF 31

|   |   |     |         |       |
|---|---|-----|---------|-------|
| 3 | 1 | 1   | 97.03   | 2.37  |
| 3 | 1 | 1   | 122.01  | 2.69  |
| 3 | 1 | 1   | 103.00  | 2.14  |
| 3 | 1 | 1   | 90.69   | 1.29  |
| 3 | 1 | 1   | 103.74  | 1.90  |
| 3 | 1 | 1   | 116.58  | 2.15  |
| 3 | 1 | 2   | 1415.48 | 14.02 |
| 3 | 1 | 2   | 1313.28 | 12.75 |
| 3 | 1 | 2   | 1288.82 | 13.77 |
| 3 | 1 | 2   | 1342.39 | 14.20 |
| 3 | 1 | 2   | 1373.98 | 13.19 |
| 3 | 1 | 3   | 1028.04 | 12.07 |
| 3 | 1 | 3   | 1020.80 | 10.73 |
| 3 | 1 | 4   | 161.41  | 3.14  |
| 3 | 1 | 4   | 169.68  | 3.58  |
| 3 | 1 | 5   | 71.79   | 2.19  |
| 3 | 1 | 5   | 80.72   | 2.63  |
| 3 | 1 | 6   | 154.45  | 4.09  |
| 3 | 1 | 7   | 699.90  | 10.27 |
| 3 | 1 | 7   | 676.81  | 10.15 |
| 3 | 1 | 8   | 1.00    | 0.65  |
| 3 | 2 | -16 | 25.95   | 1.21  |
| 3 | 2 | -16 | 28.29   | 1.31  |
| 3 | 2 | -15 | 2.64    | 0.90  |
| 3 | 2 | -15 | 0.92    | 0.82  |
| 3 | 2 | -14 | 64.77   | 3.69  |
| 3 | 2 | -14 | 65.76   | 3.22  |
| 3 | 2 | -13 | 54.40   | 3.83  |
| 3 | 2 | -13 | 59.42   | 3.43  |
| 3 | 2 | -13 | 55.57   | 2.93  |
| 3 | 2 | -13 | 54.04   | 3.15  |
| 3 | 2 | -13 | 53.60   | 3.91  |
| 3 | 2 | -12 | 261.57  | 8.24  |
| 3 | 2 | -12 | 274.73  | 7.85  |
| 3 | 2 | -12 | 247.90  | 6.77  |
| 3 | 2 | -12 | 260.77  | 7.10  |
| 3 | 2 | -12 | 241.67  | 8.07  |
| 3 | 2 | -12 | 235.51  | 7.37  |
| 3 | 2 | -12 | 256.96  | 6.50  |
| 3 | 2 | -11 | 273.56  | 6.86  |
| 3 | 2 | -11 | 327.00  | 8.94  |

## CIF 31

|   |   |     |        |      |
|---|---|-----|--------|------|
| 3 | 2 | -11 | 379.09 | 8.48 |
| 3 | 2 | -11 | 337.96 | 7.94 |
| 3 | 2 | -11 | 332.65 | 8.32 |
| 3 | 2 | -11 | 310.50 | 8.32 |
| 3 | 2 | -11 | 306.18 | 7.39 |
| 3 | 2 | -11 | 319.73 | 9.00 |
| 3 | 2 | -11 | 309.26 | 8.34 |
| 3 | 2 | -11 | 295.80 | 6.92 |
| 3 | 2 | -10 | 16.99  | 1.72 |
| 3 | 2 | -10 | 14.52  | 1.66 |
| 3 | 2 | -10 | 12.14  | 1.67 |
| 3 | 2 | -10 | 22.54  | 1.98 |
| 3 | 2 | -10 | 13.91  | 1.87 |
| 3 | 2 | -10 | 13.96  | 1.70 |
| 3 | 2 | -10 | 12.44  | 1.87 |
| 3 | 2 | -10 | 13.73  | 1.88 |
| 3 | 2 | -10 | 19.17  | 2.16 |
| 3 | 2 | -10 | 16.26  | 1.64 |
| 3 | 2 | -10 | 13.70  | 2.03 |
| 3 | 2 | -9  | 21.33  | 1.78 |
| 3 | 2 | -9  | 18.41  | 1.75 |
| 3 | 2 | -9  | 18.16  | 1.88 |
| 3 | 2 | -9  | 21.28  | 1.84 |
| 3 | 2 | -9  | 22.23  | 1.96 |
| 3 | 2 | -9  | 24.80  | 2.30 |
| 3 | 2 | -9  | 20.95  | 2.06 |
| 3 | 2 | -9  | 20.89  | 1.72 |
| 3 | 2 | -9  | 17.08  | 1.53 |
| 3 | 2 | -8  | 114.32 | 4.13 |
| 3 | 2 | -8  | 134.37 | 4.01 |
| 3 | 2 | -8  | 119.16 | 4.00 |
| 3 | 2 | -8  | 124.98 | 3.94 |
| 3 | 2 | -8  | 122.57 | 4.23 |
| 3 | 2 | -8  | 108.41 | 4.03 |
| 3 | 2 | -8  | 123.59 | 4.18 |
| 3 | 2 | -8  | 120.20 | 4.31 |
| 3 | 2 | -8  | 126.30 | 4.48 |
| 3 | 2 | -8  | 116.49 | 3.50 |
| 3 | 2 | -8  | 133.12 | 4.13 |
| 3 | 2 | -8  | 113.50 | 4.25 |
| 3 | 2 | -8  | 123.51 | 4.35 |

## CIF 31

|   |   |    |         |       |
|---|---|----|---------|-------|
| 3 | 2 | -8 | 116.22  | 3.77  |
| 3 | 2 | -7 | 1152.77 | 14.98 |
| 3 | 2 | -7 | 1337.08 | 14.70 |
| 3 | 2 | -7 | 1173.33 | 15.00 |
| 3 | 2 | -7 | 1176.91 | 15.09 |
| 3 | 2 | -7 | 1271.74 | 14.80 |
| 3 | 2 | -7 | 1289.11 | 15.99 |
| 3 | 2 | -7 | 1226.90 | 15.33 |
| 3 | 2 | -7 | 1281.74 | 15.44 |
| 3 | 2 | -7 | 1189.69 | 14.22 |
| 3 | 2 | -7 | 1130.14 | 14.32 |
| 3 | 2 | -7 | 1072.63 | 14.76 |
| 3 | 2 | -7 | 1249.00 | 15.59 |
| 3 | 2 | -7 | 1092.32 | 12.55 |
| 3 | 2 | -7 | 1230.88 | 14.74 |
| 3 | 2 | -6 | 487.38  | 7.57  |
| 3 | 2 | -6 | 467.85  | 7.63  |
| 3 | 2 | -6 | 444.53  | 6.85  |
| 3 | 2 | -6 | 454.50  | 7.53  |
| 3 | 2 | -6 | 472.05  | 7.84  |
| 3 | 2 | -6 | 409.09  | 5.59  |
| 3 | 2 | -6 | 434.23  | 6.88  |
| 3 | 2 | -6 | 440.03  | 7.29  |
| 3 | 2 | -6 | 489.25  | 7.92  |
| 3 | 2 | -6 | 478.02  | 7.90  |
| 3 | 2 | -6 | 484.83  | 7.40  |
| 3 | 2 | -6 | 445.61  | 6.70  |
| 3 | 2 | -6 | 430.20  | 7.20  |
| 3 | 2 | -6 | 439.44  | 6.17  |
| 3 | 2 | -6 | 490.86  | 7.57  |
| 3 | 2 | -5 | 861.95  | 10.58 |
| 3 | 2 | -5 | 841.57  | 11.19 |
| 3 | 2 | -5 | 825.43  | 10.19 |
| 3 | 2 | -5 | 758.10  | 9.02  |
| 3 | 2 | -5 | 787.23  | 10.15 |
| 3 | 2 | -5 | 873.02  | 11.54 |
| 3 | 2 | -5 | 876.21  | 11.04 |
| 3 | 2 | -5 | 885.32  | 10.61 |
| 3 | 2 | -5 | 921.90  | 11.25 |
| 3 | 2 | -5 | 798.91  | 9.70  |
| 3 | 2 | -5 | 786.48  | 10.61 |

## CIF 31

|   |   |    |         |       |
|---|---|----|---------|-------|
| 3 | 2 | -4 | 407.58  | 5.88  |
| 3 | 2 | -4 | 351.73  | 6.49  |
| 3 | 2 | -4 | 357.70  | 5.76  |
| 3 | 2 | -4 | 365.82  | 5.18  |
| 3 | 2 | -4 | 388.59  | 5.80  |
| 3 | 2 | -4 | 402.47  | 6.55  |
| 3 | 2 | -4 | 392.79  | 6.59  |
| 3 | 2 | -4 | 365.02  | 5.56  |
| 3 | 2 | -4 | 375.76  | 6.22  |
| 3 | 2 | -4 | 399.29  | 5.86  |
| 3 | 2 | -4 | 359.46  | 6.26  |
| 3 | 2 | -4 | 364.02  | 4.83  |
| 3 | 2 | -3 | 67.61   | 1.96  |
| 3 | 2 | -3 | 60.71   | 2.06  |
| 3 | 2 | -3 | 60.15   | 1.61  |
| 3 | 2 | -3 | 61.98   | 2.60  |
| 3 | 2 | -3 | 69.65   | 2.43  |
| 3 | 2 | -3 | 80.58   | 2.03  |
| 3 | 2 | -3 | 72.99   | 2.34  |
| 3 | 2 | -3 | 74.80   | 2.26  |
| 3 | 2 | -3 | 58.11   | 2.02  |
| 3 | 2 | -3 | 60.63   | 1.96  |
| 3 | 2 | -3 | 70.39   | 1.87  |
| 3 | 2 | -2 | 857.23  | 8.90  |
| 3 | 2 | -2 | 879.73  | 8.51  |
| 3 | 2 | -2 | 836.42  | 9.83  |
| 3 | 2 | -2 | 843.40  | 9.57  |
| 3 | 2 | -2 | 866.88  | 9.41  |
| 3 | 2 | -1 | 4484.15 | 35.30 |
| 3 | 2 | -1 | 3928.51 | 39.00 |
| 3 | 2 | -1 | 4428.80 | 36.37 |
| 3 | 2 | -1 | 4494.28 | 35.25 |
| 3 | 2 | -1 | 3896.37 | 37.16 |
| 3 | 2 | -1 | 4404.92 | 36.86 |
| 3 | 2 | -1 | 4693.51 | 37.51 |
| 3 | 2 | -1 | 4548.30 | 36.85 |
| 3 | 2 | 0  | 605.79  | 8.77  |
| 3 | 2 | 0  | 616.75  | 7.20  |
| 3 | 2 | 0  | 570.39  | 6.21  |
| 3 | 2 | 0  | 604.70  | 7.10  |
| 3 | 2 | 0  | 570.52  | 7.57  |

## CIF 31

|   |   |     |         |       |
|---|---|-----|---------|-------|
| 3 | 2 | 0   | 573.47  | 7.40  |
| 3 | 2 | 0   | 531.48  | 7.07  |
| 3 | 2 | 1   | 1481.65 | 15.64 |
| 3 | 2 | 1   | 1352.92 | 14.21 |
| 3 | 2 | 1   | 1497.30 | 14.49 |
| 3 | 2 | 1   | 1250.79 | 12.71 |
| 3 | 2 | 1   | 1349.19 | 13.62 |
| 3 | 2 | 1   | 1259.96 | 14.00 |
| 3 | 2 | 2   | 810.54  | 10.11 |
| 3 | 2 | 2   | 833.98  | 9.68  |
| 3 | 2 | 2   | 657.25  | 7.75  |
| 3 | 2 | 2   | 633.79  | 8.42  |
| 3 | 2 | 2   | 673.25  | 8.80  |
| 3 | 2 | 2   | 644.87  | 8.24  |
| 3 | 2 | 3   | 1494.09 | 15.35 |
| 3 | 2 | 3   | 1544.51 | 15.93 |
| 3 | 2 | 3   | 1423.40 | 14.55 |
| 3 | 2 | 3   | 1346.56 | 13.68 |
| 3 | 2 | 3   | 1245.98 | 13.88 |
| 3 | 2 | 3   | 1166.35 | 14.15 |
| 3 | 2 | 4   | 348.09  | 5.52  |
| 3 | 2 | 4   | 381.22  | 6.50  |
| 3 | 2 | 5   | 609.38  | 8.32  |
| 3 | 2 | 5   | 606.45  | 9.28  |
| 3 | 2 | 6   | 15.85   | 1.25  |
| 3 | 2 | 6   | 19.15   | 1.62  |
| 3 | 2 | 7   | 97.53   | 3.62  |
| 3 | 2 | 7   | 96.24   | 3.11  |
| 3 | 2 | 8   | 129.54  | 3.89  |
| 3 | 3 | -16 | 227.45  | 3.82  |
| 3 | 3 | -15 | 8.87    | 1.15  |
| 3 | 3 | -14 | 377.98  | 9.38  |
| 3 | 3 | -14 | 425.89  | 8.97  |
| 3 | 3 | -14 | 416.33  | 7.79  |
| 3 | 3 | -14 | 395.42  | 8.21  |
| 3 | 3 | -13 | 61.63   | 3.65  |
| 3 | 3 | -13 | 62.93   | 4.12  |
| 3 | 3 | -13 | 68.87   | 3.41  |
| 3 | 3 | -13 | 58.98   | 3.36  |
| 3 | 3 | -13 | 53.40   | 3.76  |
| 3 | 3 | -13 | 57.02   | 2.95  |

## CIF 31

|   |   |     |        |       |
|---|---|-----|--------|-------|
| 3 | 3 | -12 | 185.30 | 6.58  |
| 3 | 3 | -12 | 171.32 | 6.77  |
| 3 | 3 | -12 | 197.69 | 6.21  |
| 3 | 3 | -12 | 180.44 | 5.87  |
| 3 | 3 | -12 | 194.35 | 6.02  |
| 3 | 3 | -12 | 176.92 | 6.82  |
| 3 | 3 | -12 | 172.03 | 6.36  |
| 3 | 3 | -12 | 188.83 | 5.34  |
| 3 | 3 | -11 | 9.93   | 1.56  |
| 3 | 3 | -11 | 9.85   | 1.65  |
| 3 | 3 | -11 | 9.59   | 1.59  |
| 3 | 3 | -11 | 7.98   | 1.66  |
| 3 | 3 | -11 | 9.30   | 1.83  |
| 3 | 3 | -11 | 11.26  | 1.71  |
| 3 | 3 | -11 | 8.65   | 1.88  |
| 3 | 3 | -11 | 10.96  | 1.94  |
| 3 | 3 | -11 | 8.01   | 1.35  |
| 3 | 3 | -10 | 872.26 | 12.68 |
| 3 | 3 | -10 | 743.39 | 13.21 |
| 3 | 3 | -10 | 896.62 | 15.52 |
| 3 | 3 | -10 | 908.15 | 15.16 |
| 3 | 3 | -10 | 783.19 | 14.07 |
| 3 | 3 | -10 | 874.54 | 13.76 |
| 3 | 3 | -10 | 915.71 | 15.48 |
| 3 | 3 | -10 | 860.65 | 14.00 |
| 3 | 3 | -10 | 767.08 | 14.39 |
| 3 | 3 | -10 | 821.50 | 14.55 |
| 3 | 3 | -10 | 855.12 | 13.21 |
| 3 | 3 | -10 | 888.00 | 12.57 |
| 3 | 3 | -9  | 31.36  | 2.12  |
| 3 | 3 | -9  | 25.03  | 2.14  |
| 3 | 3 | -9  | 23.76  | 2.05  |
| 3 | 3 | -9  | 22.18  | 2.34  |
| 3 | 3 | -9  | 22.74  | 2.16  |
| 3 | 3 | -9  | 21.44  | 2.17  |
| 3 | 3 | -9  | 19.73  | 2.17  |
| 3 | 3 | -9  | 22.45  | 1.80  |
| 3 | 3 | -9  | 33.67  | 2.36  |
| 3 | 3 | -9  | 27.43  | 2.51  |
| 3 | 3 | -9  | 24.74  | 2.04  |
| 3 | 3 | -8  | 203.66 | 5.14  |

## CIF 31

|   |   |    |        |       |
|---|---|----|--------|-------|
| 3 | 3 | -8 | 219.20 | 5.90  |
| 3 | 3 | -8 | 241.22 | 6.52  |
| 3 | 3 | -8 | 233.47 | 5.84  |
| 3 | 3 | -8 | 237.51 | 7.01  |
| 3 | 3 | -8 | 224.51 | 6.07  |
| 3 | 3 | -8 | 217.93 | 6.01  |
| 3 | 3 | -8 | 209.44 | 5.35  |
| 3 | 3 | -8 | 211.43 | 5.45  |
| 3 | 3 | -8 | 219.82 | 5.95  |
| 3 | 3 | -8 | 214.21 | 5.67  |
| 3 | 3 | -7 | 602.95 | 9.22  |
| 3 | 3 | -7 | 620.78 | 10.31 |
| 3 | 3 | -7 | 649.99 | 10.62 |
| 3 | 3 | -7 | 616.40 | 9.71  |
| 3 | 3 | -7 | 597.53 | 9.70  |
| 3 | 3 | -7 | 594.69 | 9.21  |
| 3 | 3 | -7 | 571.43 | 9.77  |
| 3 | 3 | -7 | 649.59 | 10.57 |
| 3 | 3 | -7 | 595.21 | 9.93  |
| 3 | 3 | -7 | 637.48 | 9.96  |
| 3 | 3 | -7 | 620.22 | 9.27  |
| 3 | 3 | -7 | 630.23 | 9.71  |
| 3 | 3 | -7 | 588.29 | 9.85  |
| 3 | 3 | -7 | 637.98 | 10.58 |
| 3 | 3 | -7 | 587.90 | 9.91  |
| 3 | 3 | -6 | 695.03 | 9.93  |
| 3 | 3 | -6 | 689.85 | 10.48 |
| 3 | 3 | -6 | 691.38 | 9.49  |
| 3 | 3 | -6 | 672.15 | 10.28 |
| 3 | 3 | -6 | 640.74 | 7.75  |
| 3 | 3 | -6 | 590.37 | 9.41  |
| 3 | 3 | -6 | 674.34 | 11.61 |
| 3 | 3 | -6 | 619.17 | 9.72  |
| 3 | 3 | -6 | 634.40 | 10.09 |
| 3 | 3 | -6 | 657.41 | 10.52 |
| 3 | 3 | -6 | 674.45 | 10.30 |
| 3 | 3 | -6 | 679.01 | 9.80  |
| 3 | 3 | -6 | 633.12 | 9.62  |
| 3 | 3 | -6 | 683.56 | 9.81  |
| 3 | 3 | -6 | 649.30 | 10.19 |
| 3 | 3 | -6 | 654.26 | 8.90  |



## CIF 31

|   |   |    |         |       |
|---|---|----|---------|-------|
| 3 | 3 | -6 | 649.03  | 10.14 |
| 3 | 3 | -5 | 578.93  | 8.78  |
| 3 | 3 | -5 | 641.15  | 9.01  |
| 3 | 3 | -5 | 670.85  | 9.87  |
| 3 | 3 | -5 | 680.96  | 8.01  |
| 3 | 3 | -5 | 670.43  | 9.49  |
| 3 | 3 | -5 | 694.53  | 9.44  |
| 3 | 3 | -5 | 652.06  | 9.69  |
| 3 | 3 | -5 | 746.30  | 10.50 |
| 3 | 3 | -5 | 608.53  | 8.87  |
| 3 | 3 | -5 | 722.76  | 10.15 |
| 3 | 3 | -5 | 702.30  | 9.07  |
| 3 | 3 | -5 | 655.93  | 9.85  |
| 3 | 3 | -4 | 90.48   | 2.59  |
| 3 | 3 | -4 | 107.06  | 3.62  |
| 3 | 3 | -4 | 89.89   | 2.82  |
| 3 | 3 | -4 | 85.50   | 2.38  |
| 3 | 3 | -4 | 115.00  | 4.05  |
| 3 | 3 | -4 | 94.34   | 3.33  |
| 3 | 3 | -4 | 106.86  | 3.56  |
| 3 | 3 | -4 | 80.62   | 2.66  |
| 3 | 3 | -4 | 91.89   | 2.54  |
| 3 | 3 | -4 | 103.34  | 3.11  |
| 3 | 3 | -4 | 89.35   | 2.73  |
| 3 | 3 | -4 | 83.09   | 2.04  |
| 3 | 3 | -3 | 954.86  | 10.40 |
| 3 | 3 | -3 | 927.92  | 12.55 |
| 3 | 3 | -3 | 1048.64 | 11.51 |
| 3 | 3 | -3 | 1024.70 | 10.46 |
| 3 | 3 | -3 | 1122.27 | 13.28 |
| 3 | 3 | -3 | 1079.56 | 11.79 |
| 3 | 3 | -3 | 951.45  | 11.46 |
| 3 | 3 | -3 | 985.18  | 12.34 |
| 3 | 3 | -3 | 1108.29 | 11.65 |
| 3 | 3 | -2 | 231.85  | 5.53  |
| 3 | 3 | -2 | 247.34  | 4.67  |
| 3 | 3 | -2 | 261.74  | 3.57  |
| 3 | 3 | -2 | 256.10  | 3.99  |
| 3 | 3 | -2 | 230.01  | 5.19  |
| 3 | 3 | -2 | 262.54  | 4.90  |
| 3 | 3 | -2 | 246.15  | 4.51  |

## CIF 31

|   |   |     |         |       |
|---|---|-----|---------|-------|
| 3 | 3 | -2  | 263.64  | 5.40  |
| 3 | 3 | -2  | 250.17  | 4.61  |
| 3 | 3 | -1  | 1884.44 | 23.36 |
| 3 | 3 | -1  | 2242.36 | 21.50 |
| 3 | 3 | -1  | 2248.19 | 20.40 |
| 3 | 3 | -1  | 2298.68 | 20.41 |
| 3 | 3 | -1  | 2345.26 | 21.90 |
| 3 | 3 | -1  | 2240.34 | 20.97 |
| 3 | 3 | -1  | 2243.43 | 22.10 |
| 3 | 3 | -1  | 2365.58 | 21.88 |
| 3 | 3 | -1  | 2288.17 | 22.86 |
| 3 | 3 | 0   | 775.00  | 8.87  |
| 3 | 3 | 0   | 719.73  | 8.13  |
| 3 | 3 | 0   | 789.74  | 9.18  |
| 3 | 3 | 0   | 730.36  | 9.42  |
| 3 | 3 | 0   | 737.83  | 9.44  |
| 3 | 3 | 0   | 757.61  | 9.30  |
| 3 | 3 | 0   | 729.11  | 9.85  |
| 3 | 3 | 1   | 4416.01 | 38.30 |
| 3 | 3 | 1   | 4654.90 | 39.59 |
| 3 | 3 | 1   | 4428.96 | 39.89 |
| 3 | 3 | 1   | 4571.67 | 39.96 |
| 3 | 3 | 1   | 4412.15 | 40.32 |
| 3 | 3 | 1   | 4767.29 | 40.45 |
| 3 | 3 | 2   | 635.15  | 7.85  |
| 3 | 3 | 2   | 658.43  | 9.18  |
| 3 | 3 | 2   | 641.52  | 8.86  |
| 3 | 3 | 3   | 548.10  | 8.48  |
| 3 | 3 | 3   | 538.60  | 7.96  |
| 3 | 3 | 4   | 1066.28 | 12.61 |
| 3 | 3 | 4   | 1072.33 | 13.36 |
| 3 | 3 | 5   | 577.43  | 9.49  |
| 3 | 3 | 5   | 595.69  | 9.12  |
| 3 | 3 | 6   | 463.16  | 7.59  |
| 3 | 3 | 6   | 486.16  | 8.81  |
| 3 | 3 | 6   | 477.36  | 8.18  |
| 3 | 3 | 7   | 23.51   | 1.75  |
| 3 | 3 | 8   | 176.81  | 4.56  |
| 3 | 4 | -16 | 11.52   | 0.79  |
| 3 | 4 | -15 | 142.20  | 4.15  |
| 3 | 4 | -15 | 148.37  | 3.54  |

## CIF 31

|   |   |     |        |       |
|---|---|-----|--------|-------|
| 3 | 4 | -14 | 7.02   | 1.55  |
| 3 | 4 | -14 | 7.37   | 1.26  |
| 3 | 4 | -13 | 44.58  | 3.29  |
| 3 | 4 | -13 | 42.85  | 2.81  |
| 3 | 4 | -13 | 44.59  | 2.87  |
| 3 | 4 | -13 | 37.56  | 2.35  |
| 3 | 4 | -12 | 110.62 | 5.14  |
| 3 | 4 | -12 | 103.28 | 4.63  |
| 3 | 4 | -12 | 96.36  | 4.35  |
| 3 | 4 | -12 | 104.67 | 4.67  |
| 3 | 4 | -12 | 93.08  | 5.02  |
| 3 | 4 | -12 | 107.51 | 3.93  |
| 3 | 4 | -11 | 185.57 | 5.17  |
| 3 | 4 | -11 | 153.72 | 5.67  |
| 3 | 4 | -11 | 177.35 | 6.60  |
| 3 | 4 | -11 | 182.03 | 6.28  |
| 3 | 4 | -11 | 172.07 | 5.76  |
| 3 | 4 | -11 | 172.55 | 6.38  |
| 3 | 4 | -11 | 176.87 | 6.05  |
| 3 | 4 | -11 | 147.11 | 6.08  |
| 3 | 4 | -11 | 164.65 | 6.40  |
| 3 | 4 | -11 | 152.66 | 6.43  |
| 3 | 4 | -11 | 170.89 | 5.61  |
| 3 | 4 | -11 | 166.95 | 4.95  |
| 3 | 4 | -10 | 359.10 | 7.50  |
| 3 | 4 | -10 | 354.26 | 8.55  |
| 3 | 4 | -10 | 377.51 | 9.68  |
| 3 | 4 | -10 | 373.52 | 8.59  |
| 3 | 4 | -10 | 369.57 | 9.13  |
| 3 | 4 | -10 | 347.64 | 9.00  |
| 3 | 4 | -10 | 333.31 | 9.38  |
| 3 | 4 | -10 | 367.27 | 7.98  |
| 3 | 4 | -10 | 370.59 | 8.14  |
| 3 | 4 | -10 | 371.38 | 9.44  |
| 3 | 4 | -10 | 361.20 | 8.58  |
| 3 | 4 | -9  | 677.39 | 10.77 |
| 3 | 4 | -9  | 681.17 | 12.12 |
| 3 | 4 | -9  | 582.69 | 11.83 |
| 3 | 4 | -9  | 677.52 | 11.68 |
| 3 | 4 | -9  | 734.69 | 13.82 |
| 3 | 4 | -9  | 698.41 | 12.52 |

## CIF 31

|   |   |    |        |       |
|---|---|----|--------|-------|
| 3 | 4 | -9 | 593.91 | 11.74 |
| 3 | 4 | -9 | 703.84 | 11.51 |
| 3 | 4 | -9 | 728.97 | 11.61 |
| 3 | 4 | -9 | 557.25 | 11.78 |
| 3 | 4 | -9 | 687.76 | 11.95 |
| 3 | 4 | -8 | 2.34   | 0.88  |
| 3 | 4 | -8 | 3.95   | 1.19  |
| 3 | 4 | -8 | 3.27   | 1.02  |
| 3 | 4 | -8 | 4.35   | 1.24  |
| 3 | 4 | -8 | 2.84   | 0.97  |
| 3 | 4 | -8 | 3.03   | 0.94  |
| 3 | 4 | -8 | 3.54   | 1.23  |
| 3 | 4 | -8 | 2.49   | 0.86  |
| 3 | 4 | -8 | 4.16   | 1.18  |
| 3 | 4 | -8 | 2.68   | 1.18  |
| 3 | 4 | -8 | 2.41   | 1.04  |
| 3 | 4 | -8 | 3.82   | 1.14  |
| 3 | 4 | -7 | 4.51   | 1.04  |
| 3 | 4 | -7 | 5.71   | 1.08  |
| 3 | 4 | -7 | 5.12   | 1.30  |
| 3 | 4 | -7 | 5.12   | 1.14  |
| 3 | 4 | -7 | 3.99   | 1.42  |
| 3 | 4 | -7 | 6.48   | 1.26  |
| 3 | 4 | -7 | 5.40   | 0.96  |
| 3 | 4 | -7 | 5.87   | 1.13  |
| 3 | 4 | -7 | 4.63   | 1.25  |
| 3 | 4 | -7 | 4.74   | 1.19  |
| 3 | 4 | -7 | 6.02   | 1.11  |
| 3 | 4 | -7 | 4.46   | 1.09  |
| 3 | 4 | -7 | 6.92   | 1.33  |
| 3 | 4 | -7 | 5.36   | 1.27  |
| 3 | 4 | -7 | 6.10   | 1.29  |
| 3 | 4 | -6 | 14.39  | 1.63  |
| 3 | 4 | -6 | 14.51  | 1.42  |
| 3 | 4 | -6 | 15.25  | 1.61  |
| 3 | 4 | -6 | 13.29  | 1.43  |
| 3 | 4 | -6 | 12.08  | 1.80  |
| 3 | 4 | -6 | 15.63  | 1.57  |
| 3 | 4 | -6 | 18.58  | 1.69  |
| 3 | 4 | -6 | 13.23  | 1.62  |
| 3 | 4 | -6 | 15.01  | 1.53  |

## CIF 31

|   |   |    |         |       |
|---|---|----|---------|-------|
| 3 | 4 | -6 | 16.55   | 1.61  |
| 3 | 4 | -6 | 14.57   | 1.58  |
| 3 | 4 | -6 | 14.08   | 1.61  |
| 3 | 4 | -5 | 17.31   | 1.64  |
| 3 | 4 | -5 | 19.88   | 1.56  |
| 3 | 4 | -5 | 16.68   | 1.57  |
| 3 | 4 | -5 | 18.32   | 1.13  |
| 3 | 4 | -5 | 14.63   | 1.86  |
| 3 | 4 | -5 | 17.93   | 1.44  |
| 3 | 4 | -5 | 15.76   | 1.71  |
| 3 | 4 | -5 | 18.88   | 1.63  |
| 3 | 4 | -5 | 18.54   | 1.79  |
| 3 | 4 | -5 | 18.33   | 1.69  |
| 3 | 4 | -5 | 18.46   | 1.60  |
| 3 | 4 | -4 | 14.13   | 1.54  |
| 3 | 4 | -4 | 18.19   | 1.48  |
| 3 | 4 | -4 | 15.54   | 1.44  |
| 3 | 4 | -4 | 15.32   | 1.16  |
| 3 | 4 | -4 | 13.98   | 1.79  |
| 3 | 4 | -4 | 13.13   | 1.66  |
| 3 | 4 | -4 | 16.93   | 1.63  |
| 3 | 4 | -4 | 15.36   | 1.60  |
| 3 | 4 | -4 | 14.93   | 1.69  |
| 3 | 4 | -4 | 14.81   | 1.32  |
| 3 | 4 | -4 | 15.51   | 1.48  |
| 3 | 4 | -4 | 15.56   | 1.40  |
| 3 | 4 | -4 | 14.36   | 1.53  |
| 3 | 4 | -4 | 17.39   | 1.03  |
| 3 | 4 | -3 | 1581.40 | 18.11 |
| 3 | 4 | -3 | 1594.97 | 16.92 |
| 3 | 4 | -3 | 1563.48 | 17.25 |
| 3 | 4 | -3 | 1671.53 | 15.93 |
| 3 | 4 | -3 | 1381.51 | 18.97 |
| 3 | 4 | -3 | 1270.43 | 17.28 |
| 3 | 4 | -3 | 1598.15 | 18.02 |
| 3 | 4 | -3 | 1390.85 | 17.99 |
| 3 | 4 | -3 | 1438.69 | 16.44 |
| 3 | 4 | -3 | 1460.04 | 17.81 |
| 3 | 4 | -3 | 1614.01 | 17.09 |
| 3 | 4 | -2 | 619.93  | 9.39  |
| 3 | 4 | -2 | 578.10  | 8.50  |

## CIF 31

|   |   |    |        |       |
|---|---|----|--------|-------|
| 3 | 4 | -2 | 543.60 | 10.07 |
| 3 | 4 | -2 | 553.60 | 7.53  |
| 3 | 4 | -2 | 630.81 | 9.37  |
| 3 | 4 | -2 | 586.33 | 9.86  |
| 3 | 4 | -2 | 575.96 | 9.25  |
| 3 | 4 | -2 | 567.46 | 8.44  |
| 3 | 4 | -1 | 30.04  | 1.91  |
| 3 | 4 | -1 | 28.27  | 1.76  |
| 3 | 4 | -1 | 26.04  | 1.35  |
| 3 | 4 | -1 | 30.57  | 1.81  |
| 3 | 4 | -1 | 30.74  | 2.13  |
| 3 | 4 | -1 | 30.70  | 1.95  |
| 3 | 4 | 0  | 50.64  | 2.35  |
| 3 | 4 | 0  | 38.49  | 2.01  |
| 3 | 4 | 0  | 44.41  | 1.78  |
| 3 | 4 | 0  | 49.37  | 2.59  |
| 3 | 4 | 0  | 38.40  | 2.04  |
| 3 | 4 | 0  | 47.60  | 2.31  |
| 3 | 4 | 1  | 503.04 | 7.75  |
| 3 | 4 | 1  | 447.77 | 6.77  |
| 3 | 4 | 1  | 467.05 | 7.61  |
| 3 | 4 | 1  | 478.30 | 8.59  |
| 3 | 4 | 1  | 482.14 | 7.84  |
| 3 | 4 | 1  | 450.16 | 7.63  |
| 3 | 4 | 2  | 271.31 | 5.07  |
| 3 | 4 | 2  | 272.61 | 6.22  |
| 3 | 4 | 2  | 281.40 | 6.11  |
| 3 | 4 | 3  | 191.64 | 4.31  |
| 3 | 4 | 3  | 203.60 | 4.97  |
| 3 | 4 | 3  | 207.64 | 5.19  |
| 3 | 4 | 3  | 185.83 | 5.04  |
| 3 | 4 | 4  | 119.10 | 4.13  |
| 3 | 4 | 4  | 112.54 | 3.36  |
| 3 | 4 | 4  | 122.98 | 3.92  |
| 3 | 4 | 5  | 973.93 | 13.77 |
| 3 | 4 | 5  | 939.96 | 12.08 |
| 3 | 4 | 6  | 231.14 | 5.64  |
| 3 | 4 | 6  | 206.03 | 6.06  |
| 3 | 4 | 7  | 0.60   | 0.64  |
| 3 | 4 | 7  | 0.92   | 0.91  |
| 3 | 4 | 7  | 1.33   | 0.77  |

## CIF 31

|   |   |     |        |      |
|---|---|-----|--------|------|
| 3 | 5 | -15 | 288.04 | 6.24 |
| 3 | 5 | -15 | 238.79 | 4.79 |
| 3 | 5 | -14 | 18.82  | 2.09 |
| 3 | 5 | -14 | 17.97  | 1.70 |
| 3 | 5 | -14 | 15.10  | 1.58 |
| 3 | 5 | -14 | 13.44  | 1.33 |
| 3 | 5 | -13 | 231.00 | 7.34 |
| 3 | 5 | -13 | 256.53 | 7.67 |
| 3 | 5 | -13 | 232.14 | 6.59 |
| 3 | 5 | -13 | 256.47 | 6.89 |
| 3 | 5 | -13 | 269.99 | 5.94 |
| 3 | 5 | -12 | 208.83 | 7.30 |
| 3 | 5 | -12 | 232.21 | 7.55 |
| 3 | 5 | -12 | 224.55 | 6.93 |
| 3 | 5 | -12 | 221.11 | 6.83 |
| 3 | 5 | -12 | 210.12 | 6.22 |
| 3 | 5 | -11 | 281.00 | 6.37 |
| 3 | 5 | -11 | 283.00 | 7.88 |
| 3 | 5 | -11 | 268.41 | 8.49 |
| 3 | 5 | -11 | 311.37 | 8.94 |
| 3 | 5 | -11 | 294.79 | 8.30 |
| 3 | 5 | -11 | 280.92 | 8.28 |
| 3 | 5 | -11 | 278.41 | 7.05 |
| 3 | 5 | -11 | 287.28 | 7.77 |
| 3 | 5 | -11 | 292.78 | 6.63 |
| 3 | 5 | -10 | 190.20 | 5.25 |
| 3 | 5 | -10 | 186.89 | 6.41 |
| 3 | 5 | -10 | 168.84 | 6.74 |
| 3 | 5 | -10 | 187.31 | 6.50 |
| 3 | 5 | -10 | 162.26 | 6.37 |
| 3 | 5 | -10 | 185.31 | 5.90 |
| 3 | 5 | -10 | 203.21 | 5.92 |
| 3 | 5 | -10 | 177.15 | 6.59 |
| 3 | 5 | -10 | 194.00 | 6.42 |
| 3 | 5 | -9  | 166.40 | 5.12 |
| 3 | 5 | -9  | 167.87 | 6.31 |
| 3 | 5 | -9  | 173.98 | 4.97 |
| 3 | 5 | -9  | 175.23 | 6.08 |
| 3 | 5 | -9  | 170.37 | 6.16 |
| 3 | 5 | -9  | 155.75 | 6.48 |
| 3 | 5 | -9  | 167.64 | 5.21 |

## CIF 31

|   |   |    |        |      |
|---|---|----|--------|------|
| 3 | 5 | -9 | 170.16 | 6.15 |
| 3 | 5 | -9 | 145.27 | 5.29 |
| 3 | 5 | -9 | 178.86 | 5.49 |
| 3 | 5 | -9 | 167.66 | 6.16 |
| 3 | 5 | -9 | 173.74 | 6.02 |
| 3 | 5 | -8 | 13.78  | 1.66 |
| 3 | 5 | -8 | 12.09  | 1.43 |
| 3 | 5 | -8 | 15.76  | 1.99 |
| 3 | 5 | -8 | 15.05  | 2.30 |
| 3 | 5 | -8 | 13.63  | 1.68 |
| 3 | 5 | -8 | 13.76  | 1.98 |
| 3 | 5 | -8 | 14.23  | 1.88 |
| 3 | 5 | -8 | 14.44  | 1.70 |
| 3 | 5 | -8 | 10.47  | 1.61 |
| 3 | 5 | -8 | 15.29  | 1.98 |
| 3 | 5 | -8 | 14.04  | 1.97 |
| 3 | 5 | -7 | 149.00 | 5.01 |
| 3 | 5 | -7 | 161.55 | 4.64 |
| 3 | 5 | -7 | 163.24 | 5.25 |
| 3 | 5 | -7 | 172.31 | 6.45 |
| 3 | 5 | -7 | 133.41 | 4.67 |
| 3 | 5 | -7 | 154.55 | 4.73 |
| 3 | 5 | -7 | 168.36 | 5.25 |
| 3 | 5 | -7 | 162.45 | 5.49 |
| 3 | 5 | -7 | 164.04 | 5.24 |
| 3 | 5 | -7 | 158.30 | 4.91 |
| 3 | 5 | -7 | 145.54 | 5.17 |
| 3 | 5 | -7 | 163.99 | 5.57 |
| 3 | 5 | -6 | 21.49  | 2.01 |
| 3 | 5 | -6 | 24.85  | 2.13 |
| 3 | 5 | -6 | 23.86  | 1.86 |
| 3 | 5 | -6 | 22.59  | 2.04 |
| 3 | 5 | -6 | 23.48  | 1.99 |
| 3 | 5 | -6 | 24.96  | 2.12 |
| 3 | 5 | -6 | 25.12  | 2.04 |
| 3 | 5 | -6 | 22.61  | 2.16 |
| 3 | 5 | -6 | 27.28  | 2.33 |
| 3 | 5 | -6 | 24.22  | 2.11 |
| 3 | 5 | -6 | 22.03  | 1.96 |
| 3 | 5 | -6 | 30.15  | 2.27 |
| 3 | 5 | -6 | 25.51  | 1.79 |



## CIF 31

|   |   |    |        |       |
|---|---|----|--------|-------|
| 3 | 5 | -5 | 29.80  | 2.30  |
| 3 | 5 | -5 | 30.74  | 2.02  |
| 3 | 5 | -5 | 27.85  | 2.09  |
| 3 | 5 | -5 | 26.22  | 1.69  |
| 3 | 5 | -5 | 32.04  | 2.80  |
| 3 | 5 | -5 | 33.83  | 2.43  |
| 3 | 5 | -5 | 30.48  | 2.08  |
| 3 | 5 | -5 | 30.62  | 2.44  |
| 3 | 5 | -5 | 28.53  | 2.33  |
| 3 | 5 | -5 | 24.97  | 2.01  |
| 3 | 5 | -5 | 27.90  | 1.97  |
| 3 | 5 | -5 | 31.11  | 2.36  |
| 3 | 5 | -5 | 34.12  | 2.18  |
| 3 | 5 | -4 | 118.75 | 4.19  |
| 3 | 5 | -4 | 120.61 | 3.76  |
| 3 | 5 | -4 | 113.11 | 3.34  |
| 3 | 5 | -4 | 107.30 | 4.79  |
| 3 | 5 | -4 | 113.36 | 3.82  |
| 3 | 5 | -4 | 115.97 | 4.30  |
| 3 | 5 | -4 | 113.23 | 4.38  |
| 3 | 5 | -4 | 117.87 | 3.87  |
| 3 | 5 | -4 | 110.11 | 3.62  |
| 3 | 5 | -4 | 125.02 | 4.01  |
| 3 | 5 | -4 | 115.11 | 4.25  |
| 3 | 5 | -3 | 208.59 | 5.42  |
| 3 | 5 | -3 | 205.87 | 5.00  |
| 3 | 5 | -3 | 170.56 | 4.08  |
| 3 | 5 | -3 | 180.05 | 4.66  |
| 3 | 5 | -3 | 200.47 | 5.55  |
| 3 | 5 | -3 | 213.82 | 6.01  |
| 3 | 5 | -3 | 228.13 | 5.35  |
| 3 | 5 | -3 | 199.76 | 5.57  |
| 3 | 5 | -3 | 218.52 | 5.24  |
| 3 | 5 | -2 | 731.12 | 10.93 |
| 3 | 5 | -2 | 801.51 | 10.82 |
| 3 | 5 | -2 | 620.02 | 9.20  |
| 3 | 5 | -2 | 773.14 | 11.52 |
| 3 | 5 | -2 | 702.56 | 11.82 |
| 3 | 5 | -2 | 759.65 | 12.13 |
| 3 | 5 | -2 | 682.05 | 10.43 |
| 3 | 5 | -2 | 730.50 | 11.34 |

## CIF 31

|   |   |     |         |       |
|---|---|-----|---------|-------|
| 3 | 5 | -2  | 750.81  | 10.73 |
| 3 | 5 | -1  | 1016.72 | 13.24 |
| 3 | 5 | -1  | 1048.54 | 13.44 |
| 3 | 5 | -1  | 966.06  | 12.04 |
| 3 | 5 | -1  | 990.58  | 13.58 |
| 3 | 5 | -1  | 944.08  | 14.58 |
| 3 | 5 | -1  | 1068.15 | 14.92 |
| 3 | 5 | -1  | 985.67  | 13.70 |
| 3 | 5 | -1  | 1056.84 | 13.45 |
| 3 | 5 | 0   | 1333.21 | 15.73 |
| 3 | 5 | 0   | 1191.56 | 14.09 |
| 3 | 5 | 0   | 1278.64 | 17.27 |
| 3 | 5 | 0   | 1282.18 | 16.83 |
| 3 | 5 | 0   | 1196.06 | 15.48 |
| 3 | 5 | 1   | 1.70    | 0.63  |
| 3 | 5 | 1   | 2.97    | 0.96  |
| 3 | 5 | 1   | 2.99    | 1.04  |
| 3 | 5 | 1   | 3.15    | 0.98  |
| 3 | 5 | 2   | 224.88  | 4.94  |
| 3 | 5 | 2   | 224.30  | 5.73  |
| 3 | 5 | 3   | 24.11   | 1.63  |
| 3 | 5 | 3   | 28.50   | 2.04  |
| 3 | 5 | 3   | 22.06   | 1.90  |
| 3 | 5 | 3   | 29.05   | 2.16  |
| 3 | 5 | 4   | 435.05  | 8.93  |
| 3 | 5 | 4   | 501.23  | 8.86  |
| 3 | 5 | 4   | 472.30  | 9.09  |
| 3 | 5 | 4   | 464.62  | 8.74  |
| 3 | 5 | 4   | 410.84  | 9.73  |
| 3 | 5 | 5   | 454.63  | 8.66  |
| 3 | 5 | 5   | 423.47  | 9.50  |
| 3 | 5 | 6   | 1.98    | 1.11  |
| 3 | 5 | 6   | 1.80    | 0.86  |
| 3 | 5 | 7   | 191.99  | 5.64  |
| 3 | 6 | -15 | 1.41    | 0.76  |
| 3 | 6 | -15 | 1.05    | 0.51  |
| 3 | 6 | -15 | 1.72    | 0.50  |
| 3 | 6 | -14 | 288.28  | 7.01  |
| 3 | 6 | -14 | 280.46  | 6.01  |
| 3 | 6 | -14 | 299.15  | 5.27  |
| 3 | 6 | -13 | 9.76    | 1.77  |

## CIF 31

|   |   |     |        |      |
|---|---|-----|--------|------|
| 3 | 6 | -13 | 6.84   | 1.50 |
| 3 | 6 | -13 | 7.64   | 1.53 |
| 3 | 6 | -13 | 6.66   | 1.09 |
| 3 | 6 | -12 | 205.92 | 6.81 |
| 3 | 6 | -12 | 222.78 | 6.78 |
| 3 | 6 | -12 | 216.23 | 6.71 |
| 3 | 6 | -12 | 208.53 | 5.16 |
| 3 | 6 | -11 | 234.66 | 7.23 |
| 3 | 6 | -11 | 225.29 | 7.29 |
| 3 | 6 | -11 | 237.70 | 7.50 |
| 3 | 6 | -11 | 230.45 | 6.60 |
| 3 | 6 | -11 | 238.14 | 7.11 |
| 3 | 6 | -10 | 187.39 | 6.91 |
| 3 | 6 | -10 | 189.10 | 6.55 |
| 3 | 6 | -10 | 176.95 | 6.35 |
| 3 | 6 | -10 | 198.78 | 6.97 |
| 3 | 6 | -10 | 189.95 | 6.23 |
| 3 | 6 | -10 | 199.93 | 5.88 |
| 3 | 6 | -10 | 178.99 | 6.52 |
| 3 | 6 | -10 | 201.85 | 6.70 |
| 3 | 6 | -9  | 291.26 | 7.34 |
| 3 | 6 | -9  | 276.04 | 6.47 |
| 3 | 6 | -9  | 272.94 | 7.82 |
| 3 | 6 | -9  | 302.76 | 8.04 |
| 3 | 6 | -9  | 293.31 | 7.21 |
| 3 | 6 | -9  | 273.09 | 8.09 |
| 3 | 6 | -9  | 308.26 | 8.41 |
| 3 | 6 | -8  | 34.67  | 2.73 |
| 3 | 6 | -8  | 35.32  | 2.30 |
| 3 | 6 | -8  | 32.29  | 2.58 |
| 3 | 6 | -8  | 36.85  | 2.44 |
| 3 | 6 | -8  | 36.93  | 2.73 |
| 3 | 6 | -8  | 34.38  | 2.88 |
| 3 | 6 | -8  | 35.43  | 2.67 |
| 3 | 6 | -8  | 36.54  | 2.59 |
| 3 | 6 | -8  | 39.73  | 3.05 |
| 3 | 6 | -8  | 31.90  | 2.64 |
| 3 | 6 | -8  | 33.57  | 2.91 |
| 3 | 6 | -7  | 106.12 | 4.49 |
| 3 | 6 | -7  | 105.33 | 3.88 |
| 3 | 6 | -7  | 104.02 | 4.61 |

## CIF 31

|   |   |    |        |      |
|---|---|----|--------|------|
| 3 | 6 | -7 | 99.23  | 4.16 |
| 3 | 6 | -7 | 110.74 | 4.29 |
| 3 | 6 | -7 | 102.97 | 4.48 |
| 3 | 6 | -7 | 110.01 | 4.82 |
| 3 | 6 | -7 | 102.24 | 4.62 |
| 3 | 6 | -7 | 113.91 | 4.70 |
| 3 | 6 | -7 | 106.73 | 4.24 |
| 3 | 6 | -7 | 93.25  | 4.24 |
| 3 | 6 | -6 | 20.17  | 2.18 |
| 3 | 6 | -6 | 20.15  | 2.08 |
| 3 | 6 | -6 | 19.92  | 1.86 |
| 3 | 6 | -6 | 23.33  | 2.24 |
| 3 | 6 | -6 | 20.05  | 2.14 |
| 3 | 6 | -6 | 21.22  | 2.23 |
| 3 | 6 | -6 | 17.83  | 1.94 |
| 3 | 6 | -6 | 19.51  | 2.21 |
| 3 | 6 | -6 | 19.34  | 2.24 |
| 3 | 6 | -6 | 18.56  | 2.12 |
| 3 | 6 | -6 | 19.36  | 1.96 |
| 3 | 6 | -6 | 19.68  | 1.92 |
| 3 | 6 | -6 | 17.21  | 2.17 |
| 3 | 6 | -6 | 18.61  | 1.76 |
| 3 | 6 | -5 | 0.38   | 1.14 |
| 3 | 6 | -5 | 0.91   | 1.00 |
| 3 | 6 | -5 | 0.93   | 0.98 |
| 3 | 6 | -5 | 0.78   | 0.70 |
| 3 | 6 | -5 | 0.70   | 1.06 |
| 3 | 6 | -5 | 0.11   | 1.06 |
| 3 | 6 | -5 | 2.00   | 0.98 |
| 3 | 6 | -5 | -0.06  | 1.11 |
| 3 | 6 | -5 | 0.17   | 0.73 |
| 3 | 6 | -5 | 0.04   | 0.95 |
| 3 | 6 | -5 | 0.06   | 0.90 |
| 3 | 6 | -5 | 0.28   | 0.95 |
| 3 | 6 | -4 | 4.54   | 1.14 |
| 3 | 6 | -4 | 8.33   | 1.16 |
| 3 | 6 | -4 | 3.19   | 1.13 |
| 3 | 6 | -4 | 7.81   | 1.42 |
| 3 | 6 | -4 | 5.68   | 1.61 |
| 3 | 6 | -4 | 6.05   | 1.39 |
| 3 | 6 | -4 | 4.94   | 1.30 |

## CIF 31

|   |   |    |        |       |
|---|---|----|--------|-------|
| 3 | 6 | -4 | 7.34   | 1.43  |
| 3 | 6 | -4 | 8.42   | 1.54  |
| 3 | 6 | -3 | 11.96  | 1.48  |
| 3 | 6 | -3 | 11.35  | 1.47  |
| 3 | 6 | -3 | 9.84   | 1.18  |
| 3 | 6 | -3 | 15.60  | 1.75  |
| 3 | 6 | -3 | 11.32  | 1.78  |
| 3 | 6 | -3 | 11.56  | 1.57  |
| 3 | 6 | -3 | 11.68  | 1.62  |
| 3 | 6 | -3 | 11.50  | 1.49  |
| 3 | 6 | -3 | 11.67  | 1.83  |
| 3 | 6 | -2 | 399.48 | 7.84  |
| 3 | 6 | -2 | 412.51 | 7.94  |
| 3 | 6 | -2 | 422.27 | 7.26  |
| 3 | 6 | -2 | 392.84 | 8.13  |
| 3 | 6 | -2 | 404.58 | 8.99  |
| 3 | 6 | -2 | 428.22 | 9.43  |
| 3 | 6 | -2 | 443.99 | 8.48  |
| 3 | 6 | -2 | 393.66 | 8.40  |
| 3 | 6 | -2 | 398.81 | 9.38  |
| 3 | 6 | -2 | 450.03 | 8.40  |
| 3 | 6 | -1 | 8.62   | 1.36  |
| 3 | 6 | -1 | 5.36   | 0.93  |
| 3 | 6 | -1 | 5.26   | 1.20  |
| 3 | 6 | -1 | 5.24   | 1.45  |
| 3 | 6 | -1 | 4.20   | 1.27  |
| 3 | 6 | -1 | 3.61   | 1.11  |
| 3 | 6 | -1 | 4.01   | 1.08  |
| 3 | 6 | -1 | 7.12   | 1.77  |
| 3 | 6 | 0  | 737.44 | 11.51 |
| 3 | 6 | 0  | 776.38 | 10.61 |
| 3 | 6 | 0  | 713.87 | 12.05 |
| 3 | 6 | 0  | 754.23 | 12.89 |
| 3 | 6 | 0  | 661.21 | 11.11 |
| 3 | 6 | 0  | 625.06 | 12.97 |
| 3 | 6 | 0  | 830.63 | 12.03 |
| 3 | 6 | 1  | 145.56 | 4.63  |
| 3 | 6 | 1  | 161.20 | 4.98  |
| 3 | 6 | 1  | 152.73 | 4.09  |
| 3 | 6 | 1  | 142.95 | 4.68  |
| 3 | 6 | 1  | 146.26 | 5.14  |

## CIF 31

|   |   |     |        |       |
|---|---|-----|--------|-------|
| 3 | 6 | 2   | 622.14 | 11.41 |
| 3 | 6 | 2   | 630.71 | 12.08 |
| 3 | 6 | 2   | 640.63 | 10.79 |
| 3 | 6 | 2   | 630.93 | 11.11 |
| 3 | 6 | 2   | 631.88 | 12.76 |
| 3 | 6 | 3   | 1.84   | 0.90  |
| 3 | 6 | 3   | 3.03   | 1.17  |
| 3 | 6 | 3   | 2.08   | 1.01  |
| 3 | 6 | 3   | 0.97   | 1.31  |
| 3 | 6 | 4   | 104.27 | 3.87  |
| 3 | 6 | 4   | 115.32 | 4.11  |
| 3 | 6 | 4   | 103.05 | 4.66  |
| 3 | 6 | 5   | 11.00  | 1.34  |
| 3 | 6 | 5   | 7.70   | 1.57  |
| 3 | 6 | 5   | 6.63   | 1.33  |
| 3 | 6 | 6   | 44.59  | 2.72  |
| 3 | 6 | 6   | 42.98  | 2.75  |
| 3 | 6 | 7   | 4.49   | 0.84  |
| 3 | 7 | -14 | 2.51   | 0.79  |
| 3 | 7 | -14 | 5.25   | 0.70  |
| 3 | 7 | -13 | 14.41  | 1.64  |
| 3 | 7 | -13 | 14.98  | 1.72  |
| 3 | 7 | -13 | 11.40  | 1.12  |
| 3 | 7 | -12 | 33.60  | 2.76  |
| 3 | 7 | -12 | 34.56  | 2.69  |
| 3 | 7 | -12 | 34.53  | 2.80  |
| 3 | 7 | -12 | 30.79  | 2.40  |
| 3 | 7 | -12 | 37.38  | 1.99  |
| 3 | 7 | -11 | 5.20   | 1.58  |
| 3 | 7 | -11 | 3.08   | 1.47  |
| 3 | 7 | -11 | 4.46   | 1.66  |
| 3 | 7 | -11 | 4.74   | 1.29  |
| 3 | 7 | -11 | 6.18   | 1.49  |
| 3 | 7 | -10 | 354.49 | 9.23  |
| 3 | 7 | -10 | 351.19 | 8.71  |
| 3 | 7 | -10 | 335.03 | 7.63  |
| 3 | 7 | -10 | 349.20 | 9.12  |
| 3 | 7 | -9  | 2.00   | 1.38  |
| 3 | 7 | -9  | 1.68   | 1.14  |
| 3 | 7 | -9  | 5.63   | 1.50  |
| 3 | 7 | -9  | 1.61   | 1.14  |

## CIF 31

|   |   |    |        |       |
|---|---|----|--------|-------|
| 3 | 7 | -9 | 1.99   | 1.55  |
| 3 | 7 | -9 | 2.30   | 1.38  |
| 3 | 7 | -9 | 1.72   | 1.07  |
| 3 | 7 | -9 | 2.41   | 1.42  |
| 3 | 7 | -8 | 31.59  | 2.64  |
| 3 | 7 | -8 | 29.72  | 2.11  |
| 3 | 7 | -8 | 29.70  | 2.74  |
| 3 | 7 | -8 | 29.21  | 2.71  |
| 3 | 7 | -8 | 30.55  | 2.41  |
| 3 | 7 | -8 | 31.50  | 2.39  |
| 3 | 7 | -8 | 29.72  | 2.58  |
| 3 | 7 | -8 | 28.99  | 2.86  |
| 3 | 7 | -8 | 30.21  | 2.75  |
| 3 | 7 | -8 | 34.56  | 2.55  |
| 3 | 7 | -7 | 804.01 | 13.86 |
| 3 | 7 | -7 | 739.25 | 11.69 |
| 3 | 7 | -7 | 807.22 | 14.04 |
| 3 | 7 | -7 | 773.27 | 13.72 |
| 3 | 7 | -7 | 831.30 | 13.72 |
| 3 | 7 | -7 | 781.65 | 13.33 |
| 3 | 7 | -7 | 797.23 | 13.98 |
| 3 | 7 | -7 | 806.18 | 14.22 |
| 3 | 7 | -7 | 781.79 | 14.49 |
| 3 | 7 | -7 | 813.44 | 14.14 |
| 3 | 7 | -7 | 821.62 | 13.07 |
| 3 | 7 | -7 | 719.37 | 13.98 |
| 3 | 7 | -6 | 6.03   | 1.61  |
| 3 | 7 | -6 | 6.58   | 1.25  |
| 3 | 7 | -6 | 5.98   | 1.40  |
| 3 | 7 | -6 | 3.86   | 1.26  |
| 3 | 7 | -6 | 6.36   | 1.62  |
| 3 | 7 | -6 | 6.57   | 1.52  |
| 3 | 7 | -6 | 5.61   | 1.60  |
| 3 | 7 | -6 | 4.89   | 1.46  |
| 3 | 7 | -6 | 6.19   | 1.77  |
| 3 | 7 | -6 | 7.93   | 1.46  |
| 3 | 7 | -6 | 5.56   | 1.61  |
| 3 | 7 | -6 | 6.19   | 1.27  |
| 3 | 7 | -5 | 6.56   | 1.72  |
| 3 | 7 | -5 | 7.33   | 1.30  |
| 3 | 7 | -5 | 4.62   | 1.24  |

## CIF 31

|   |   |    |         |       |
|---|---|----|---------|-------|
| 3 | 7 | -5 | 7.47    | 1.42  |
| 3 | 7 | -5 | 5.99    | 1.09  |
| 3 | 7 | -5 | 4.66    | 1.49  |
| 3 | 7 | -5 | 6.19    | 1.59  |
| 3 | 7 | -5 | 5.09    | 1.61  |
| 3 | 7 | -5 | 2.59    | 1.30  |
| 3 | 7 | -5 | 6.96    | 1.80  |
| 3 | 7 | -5 | 3.08    | 1.49  |
| 3 | 7 | -5 | 7.11    | 1.44  |
| 3 | 7 | -5 | 4.33    | 1.40  |
| 3 | 7 | -5 | 4.30    | 1.30  |
| 3 | 7 | -4 | 46.05   | 2.85  |
| 3 | 7 | -4 | 49.56   | 2.78  |
| 3 | 7 | -4 | 47.00   | 2.47  |
| 3 | 7 | -4 | 50.49   | 3.45  |
| 3 | 7 | -4 | 45.45   | 3.24  |
| 3 | 7 | -4 | 45.95   | 2.97  |
| 3 | 7 | -4 | 44.85   | 3.21  |
| 3 | 7 | -4 | 52.77   | 3.05  |
| 3 | 7 | -4 | 57.31   | 3.12  |
| 3 | 7 | -4 | 42.49   | 2.99  |
| 3 | 7 | -4 | 46.43   | 3.17  |
| 3 | 7 | -3 | 1082.84 | 16.67 |
| 3 | 7 | -3 | 892.98  | 13.89 |
| 3 | 7 | -3 | 1137.53 | 14.95 |
| 3 | 7 | -3 | 925.59  | 13.15 |
| 3 | 7 | -3 | 1093.80 | 17.04 |
| 3 | 7 | -3 | 1030.68 | 16.28 |
| 3 | 7 | -3 | 999.73  | 14.78 |
| 3 | 7 | -3 | 1058.76 | 16.40 |
| 3 | 7 | -3 | 1057.13 | 16.91 |
| 3 | 7 | -3 | 1049.21 | 15.01 |
| 3 | 7 | -3 | 1037.72 | 15.02 |
| 3 | 7 | -3 | 1005.89 | 15.55 |
| 3 | 7 | -3 | 1052.94 | 16.69 |
| 3 | 7 | -2 | 14.97   | 2.17  |
| 3 | 7 | -2 | 12.90   | 1.65  |
| 3 | 7 | -2 | 11.91   | 1.32  |
| 3 | 7 | -2 | 20.50   | 2.18  |
| 3 | 7 | -2 | 16.78   | 2.16  |
| 3 | 7 | -2 | 13.25   | 1.70  |



## CIF 31

|   |   |    |        |      |
|---|---|----|--------|------|
| 3 | 7 | -2 | 15.55  | 1.76 |
| 3 | 7 | -2 | 10.57  | 1.53 |
| 3 | 7 | -2 | 15.64  | 2.25 |
| 3 | 7 | -1 | 74.11  | 4.03 |
| 3 | 7 | -1 | 78.87  | 3.49 |
| 3 | 7 | -1 | 76.91  | 4.33 |
| 3 | 7 | -1 | 76.92  | 3.88 |
| 3 | 7 | -1 | 71.94  | 3.64 |
| 3 | 7 | -1 | 78.12  | 4.08 |
| 3 | 7 | -1 | 80.45  | 3.68 |
| 3 | 7 | -1 | 81.13  | 4.42 |
| 3 | 7 | -1 | 76.55  | 3.52 |
| 3 | 7 | 0  | 9.85   | 1.72 |
| 3 | 7 | 0  | 9.52   | 1.49 |
| 3 | 7 | 0  | 10.60  | 1.95 |
| 3 | 7 | 0  | 8.92   | 1.57 |
| 3 | 7 | 0  | 8.96   | 1.43 |
| 3 | 7 | 0  | 9.15   | 1.57 |
| 3 | 7 | 0  | 7.80   | 1.39 |
| 3 | 7 | 0  | 10.27  | 2.08 |
| 3 | 7 | 0  | 9.60   | 1.50 |
| 3 | 7 | 1  | 2.50   | 1.28 |
| 3 | 7 | 1  | 2.88   | 1.00 |
| 3 | 7 | 1  | 3.91   | 1.34 |
| 3 | 7 | 1  | 3.24   | 1.31 |
| 3 | 7 | 1  | 2.51   | 1.08 |
| 3 | 7 | 1  | 3.45   | 1.11 |
| 3 | 7 | 1  | 2.36   | 1.02 |
| 3 | 7 | 1  | 2.56   | 1.09 |
| 3 | 7 | 1  | 2.46   | 1.65 |
| 3 | 7 | 2  | 36.04  | 2.37 |
| 3 | 7 | 2  | 43.79  | 2.60 |
| 3 | 7 | 2  | 34.66  | 2.43 |
| 3 | 7 | 2  | 40.18  | 2.78 |
| 3 | 7 | 2  | 39.18  | 3.07 |
| 3 | 7 | 2  | 42.97  | 2.56 |
| 3 | 7 | 3  | 336.62 | 7.42 |
| 3 | 7 | 3  | 357.85 | 9.16 |
| 3 | 7 | 3  | 354.61 | 8.83 |
| 3 | 7 | 4  | 73.33  | 3.26 |
| 3 | 7 | 4  | 81.70  | 4.04 |

## CIF 31

|   |   |     |        |      |
|---|---|-----|--------|------|
| 3 | 7 | 4   | 79.21  | 3.70 |
| 3 | 7 | 5   | 151.12 | 4.83 |
| 3 | 7 | 5   | 150.79 | 4.93 |
| 3 | 7 | 6   | 97.60  | 3.07 |
| 3 | 8 | -13 | 605.77 | 9.61 |
| 3 | 8 | -13 | 637.46 | 9.14 |
| 3 | 8 | -13 | 618.10 | 9.50 |
| 3 | 8 | -12 | 13.15  | 1.66 |
| 3 | 8 | -12 | 17.15  | 1.90 |
| 3 | 8 | -12 | 16.15  | 1.76 |
| 3 | 8 | -12 | 13.26  | 1.53 |
| 3 | 8 | -12 | 14.67  | 1.14 |
| 3 | 8 | -11 | 230.42 | 6.60 |
| 3 | 8 | -11 | 247.62 | 6.44 |
| 3 | 8 | -11 | 239.23 | 6.64 |
| 3 | 8 | -11 | 246.82 | 4.97 |
| 3 | 8 | -10 | 37.99  | 2.76 |
| 3 | 8 | -10 | 38.72  | 2.96 |
| 3 | 8 | -10 | 37.69  | 2.79 |
| 3 | 8 | -10 | 35.92  | 2.81 |
| 3 | 8 | -9  | 28.88  | 2.44 |
| 3 | 8 | -9  | 29.01  | 2.50 |
| 3 | 8 | -9  | 30.00  | 2.59 |
| 3 | 8 | -9  | 29.98  | 2.42 |
| 3 | 8 | -9  | 33.03  | 2.81 |
| 3 | 8 | -9  | 29.51  | 2.63 |
| 3 | 8 | -9  | 29.73  | 2.18 |
| 3 | 8 | -8  | 124.04 | 4.95 |
| 3 | 8 | -8  | 114.47 | 4.84 |
| 3 | 8 | -8  | 118.59 | 4.73 |
| 3 | 8 | -8  | 116.28 | 4.46 |
| 3 | 8 | -8  | 118.38 | 5.01 |
| 3 | 8 | -8  | 118.23 | 4.44 |
| 3 | 8 | -8  | 119.75 | 5.10 |
| 3 | 8 | -8  | 121.48 | 5.21 |
| 3 | 8 | -8  | 111.56 | 4.29 |
| 3 | 8 | -8  | 120.56 | 5.24 |
| 3 | 8 | -7  | 5.03   | 1.52 |
| 3 | 8 | -7  | 4.19   | 1.23 |
| 3 | 8 | -7  | 4.61   | 1.22 |
| 3 | 8 | -7  | 4.19   | 1.41 |

## CIF 31

|   |   |    |        |      |
|---|---|----|--------|------|
| 3 | 8 | -7 | 7.38   | 1.77 |
| 3 | 8 | -7 | 5.53   | 1.45 |
| 3 | 8 | -7 | 5.57   | 1.60 |
| 3 | 8 | -7 | 4.77   | 1.50 |
| 3 | 8 | -7 | 5.87   | 1.28 |
| 3 | 8 | -7 | 3.71   | 1.46 |
| 3 | 8 | -6 | 127.99 | 5.29 |
| 3 | 8 | -6 | 121.67 | 4.13 |
| 3 | 8 | -6 | 117.63 | 4.80 |
| 3 | 8 | -6 | 120.98 | 4.51 |
| 3 | 8 | -6 | 122.33 | 5.09 |
| 3 | 8 | -6 | 123.04 | 5.47 |
| 3 | 8 | -6 | 125.57 | 5.17 |
| 3 | 8 | -6 | 126.68 | 5.19 |
| 3 | 8 | -6 | 110.29 | 4.73 |
| 3 | 8 | -6 | 118.66 | 5.26 |
| 3 | 8 | -6 | 133.86 | 5.42 |
| 3 | 8 | -6 | 125.80 | 4.63 |
| 3 | 8 | -6 | 116.40 | 5.09 |
| 3 | 8 | -5 | 0.56   | 0.88 |
| 3 | 8 | -5 | 0.83   | 1.38 |
| 3 | 8 | -5 | 0.92   | 1.34 |
| 3 | 8 | -5 | 0.26   | 1.07 |
| 3 | 8 | -5 | -0.12  | 0.82 |
| 3 | 8 | -5 | -0.38  | 1.45 |
| 3 | 8 | -5 | 0.38   | 1.20 |
| 3 | 8 | -5 | 1.34   | 1.02 |
| 3 | 8 | -5 | 0.60   | 1.06 |
| 3 | 8 | -5 | 0.80   | 1.06 |
| 3 | 8 | -4 | 14.12  | 2.25 |
| 3 | 8 | -4 | 13.53  | 1.61 |
| 3 | 8 | -4 | 11.31  | 2.05 |
| 3 | 8 | -4 | 13.81  | 2.16 |
| 3 | 8 | -4 | 13.17  | 2.03 |
| 3 | 8 | -4 | 12.31  | 1.61 |
| 3 | 8 | -4 | 11.95  | 1.70 |
| 3 | 8 | -4 | 12.87  | 1.94 |
| 3 | 8 | -4 | 12.28  | 2.04 |
| 3 | 8 | -4 | 14.46  | 1.76 |
| 3 | 8 | -4 | 14.42  | 1.81 |
| 3 | 8 | -4 | 12.55  | 1.77 |

## CIF 31

|   |   |    |         |       |
|---|---|----|---------|-------|
| 3 | 8 | -4 | 12.78   | 1.92  |
| 3 | 8 | -3 | 9.09    | 1.88  |
| 3 | 8 | -3 | 11.40   | 1.50  |
| 3 | 8 | -3 | 7.56    | 2.08  |
| 3 | 8 | -3 | 7.43    | 1.88  |
| 3 | 8 | -3 | 7.04    | 1.65  |
| 3 | 8 | -3 | 9.39    | 1.75  |
| 3 | 8 | -3 | 7.60    | 1.56  |
| 3 | 8 | -3 | 7.32    | 1.41  |
| 3 | 8 | -3 | 10.97   | 1.62  |
| 3 | 8 | -3 | 8.91    | 1.64  |
| 3 | 8 | -3 | 7.05    | 1.39  |
| 3 | 8 | -3 | 7.67    | 1.69  |
| 3 | 8 | -2 | 490.74  | 10.55 |
| 3 | 8 | -2 | 495.96  | 9.22  |
| 3 | 8 | -2 | 491.65  | 11.12 |
| 3 | 8 | -2 | 442.27  | 10.33 |
| 3 | 8 | -2 | 502.06  | 10.37 |
| 3 | 8 | -2 | 416.07  | 9.40  |
| 3 | 8 | -2 | 511.12  | 10.69 |
| 3 | 8 | -2 | 539.28  | 9.93  |
| 3 | 8 | -2 | 457.24  | 10.29 |
| 3 | 8 | -2 | 561.31  | 10.25 |
| 3 | 8 | -2 | 509.45  | 11.13 |
| 3 | 8 | -1 | 1991.60 | 24.82 |
| 3 | 8 | -1 | 2003.84 | 23.25 |
| 3 | 8 | -1 | 2037.02 | 26.75 |
| 3 | 8 | -1 | 2047.11 | 26.03 |
| 3 | 8 | -1 | 2147.20 | 26.37 |
| 3 | 8 | -1 | 2011.33 | 24.53 |
| 3 | 8 | -1 | 1917.80 | 23.61 |
| 3 | 8 | -1 | 2076.25 | 25.24 |
| 3 | 8 | -1 | 2041.02 | 24.05 |
| 3 | 8 | -1 | 2080.98 | 26.32 |
| 3 | 8 | -1 | 2030.67 | 26.47 |
| 3 | 8 | 0  | 162.11  | 5.26  |
| 3 | 8 | 0  | 179.64  | 5.14  |
| 3 | 8 | 0  | 143.66  | 5.79  |
| 3 | 8 | 0  | 135.79  | 5.28  |
| 3 | 8 | 0  | 164.46  | 5.77  |
| 3 | 8 | 0  | 151.11  | 4.89  |

## CIF 31

|   |   |     |        |      |
|---|---|-----|--------|------|
| 3 | 8 | 0   | 163.96 | 5.29 |
| 3 | 8 | 0   | 176.75 | 5.25 |
| 3 | 8 | 0   | 151.54 | 5.86 |
| 3 | 8 | 0   | 181.23 | 5.32 |
| 3 | 8 | 0   | 151.53 | 5.88 |
| 3 | 8 | 1   | 28.94  | 2.07 |
| 3 | 8 | 1   | 31.96  | 2.19 |
| 3 | 8 | 1   | 29.96  | 2.64 |
| 3 | 8 | 1   | 28.66  | 2.27 |
| 3 | 8 | 1   | 32.12  | 2.46 |
| 3 | 8 | 1   | 31.40  | 2.22 |
| 3 | 8 | 1   | 31.39  | 2.77 |
| 3 | 8 | 1   | 27.13  | 2.55 |
| 3 | 8 | 2   | 9.62   | 1.63 |
| 3 | 8 | 2   | 10.43  | 1.42 |
| 3 | 8 | 2   | 9.55   | 1.76 |
| 3 | 8 | 2   | 10.59  | 1.65 |
| 3 | 8 | 2   | 10.70  | 1.75 |
| 3 | 8 | 3   | 46.26  | 2.48 |
| 3 | 8 | 3   | 45.12  | 2.86 |
| 3 | 8 | 3   | 47.14  | 2.76 |
| 3 | 8 | 3   | 45.84  | 2.82 |
| 3 | 8 | 4   | 1.17   | 0.75 |
| 3 | 9 | -12 | 13.13  | 1.22 |
| 3 | 9 | -12 | 17.32  | 1.49 |
| 3 | 9 | -11 | 87.56  | 3.17 |
| 3 | 9 | -11 | 98.02  | 3.66 |
| 3 | 9 | -10 | 147.67 | 4.43 |
| 3 | 9 | -10 | 162.81 | 5.08 |
| 3 | 9 | -10 | 163.10 | 5.06 |
| 3 | 9 | -9  | 1.47   | 0.89 |
| 3 | 9 | -9  | 1.08   | 1.01 |
| 3 | 9 | -9  | 1.13   | 1.08 |
| 3 | 9 | -9  | 2.18   | 1.15 |
| 3 | 9 | -9  | 2.12   | 1.13 |
| 3 | 9 | -8  | 50.98  | 3.05 |
| 3 | 9 | -8  | 51.39  | 2.77 |
| 3 | 9 | -8  | 53.87  | 3.15 |
| 3 | 9 | -8  | 51.52  | 2.75 |
| 3 | 9 | -8  | 48.38  | 2.92 |
| 3 | 9 | -8  | 43.21  | 3.00 |

## CIF 31

|   |   |    |        |      |
|---|---|----|--------|------|
| 3 | 9 | -8 | 50.22  | 3.16 |
| 3 | 9 | -7 | 55.99  | 3.27 |
| 3 | 9 | -7 | 55.19  | 3.13 |
| 3 | 9 | -7 | 57.52  | 3.50 |
| 3 | 9 | -7 | 55.05  | 3.09 |
| 3 | 9 | -7 | 48.03  | 2.90 |
| 3 | 9 | -7 | 55.51  | 3.39 |
| 3 | 9 | -7 | 54.15  | 3.28 |
| 3 | 9 | -6 | 41.07  | 3.04 |
| 3 | 9 | -6 | 41.09  | 2.89 |
| 3 | 9 | -6 | 44.44  | 3.27 |
| 3 | 9 | -6 | 46.11  | 2.97 |
| 3 | 9 | -6 | 38.10  | 2.53 |
| 3 | 9 | -6 | 41.49  | 2.48 |
| 3 | 9 | -6 | 43.20  | 3.03 |
| 3 | 9 | -6 | 42.32  | 2.90 |
| 3 | 9 | -5 | 46.96  | 2.83 |
| 3 | 9 | -5 | 48.09  | 3.27 |
| 3 | 9 | -5 | 50.25  | 3.52 |
| 3 | 9 | -5 | 48.92  | 3.16 |
| 3 | 9 | -5 | 48.35  | 3.22 |
| 3 | 9 | -5 | 43.71  | 2.93 |
| 3 | 9 | -5 | 44.44  | 2.64 |
| 3 | 9 | -5 | 43.01  | 2.80 |
| 3 | 9 | -5 | 41.02  | 2.65 |
| 3 | 9 | -4 | 87.88  | 4.10 |
| 3 | 9 | -4 | 86.49  | 3.89 |
| 3 | 9 | -4 | 79.78  | 4.19 |
| 3 | 9 | -4 | 82.73  | 4.12 |
| 3 | 9 | -4 | 84.26  | 3.98 |
| 3 | 9 | -4 | 71.73  | 3.65 |
| 3 | 9 | -4 | 87.52  | 3.62 |
| 3 | 9 | -4 | 72.69  | 3.41 |
| 3 | 9 | -4 | 81.34  | 3.87 |
| 3 | 9 | -3 | 138.83 | 5.05 |
| 3 | 9 | -3 | 130.90 | 4.10 |
| 3 | 9 | -3 | 138.91 | 5.41 |
| 3 | 9 | -3 | 126.42 | 5.27 |
| 3 | 9 | -3 | 134.53 | 4.84 |
| 3 | 9 | -3 | 117.15 | 4.46 |
| 3 | 9 | -3 | 128.13 | 4.59 |

## CIF 31

|   |    |     |        |      |
|---|----|-----|--------|------|
| 3 | 9  | -3  | 132.51 | 5.03 |
| 3 | 9  | -2  | 87.21  | 3.84 |
| 3 | 9  | -2  | 82.72  | 4.08 |
| 3 | 9  | -2  | 89.01  | 4.13 |
| 3 | 9  | -2  | 87.67  | 3.70 |
| 3 | 9  | -2  | 79.17  | 3.77 |
| 3 | 9  | -2  | 82.82  | 4.03 |
| 3 | 9  | -1  | 11.76  | 1.54 |
| 3 | 9  | -1  | 12.53  | 1.97 |
| 3 | 9  | -1  | 12.68  | 1.75 |
| 3 | 9  | -1  | 12.36  | 1.75 |
| 3 | 9  | -1  | 10.25  | 1.65 |
| 3 | 9  | -1  | 11.67  | 1.77 |
| 3 | 9  | -1  | 9.91   | 1.45 |
| 3 | 9  | 0   | 50.08  | 2.38 |
| 3 | 9  | 0   | 53.20  | 3.09 |
| 3 | 9  | 0   | 48.97  | 2.69 |
| 3 | 9  | 0   | 57.72  | 2.97 |
| 3 | 9  | 0   | 54.90  | 3.09 |
| 3 | 9  | 0   | 52.36  | 3.09 |
| 3 | 9  | 0   | 51.28  | 2.81 |
| 3 | 9  | 1   | 182.08 | 5.09 |
| 3 | 9  | 1   | 166.08 | 4.53 |
| 3 | 9  | 1   | 173.88 | 5.24 |
| 3 | 9  | 1   | 169.85 | 5.12 |
| 3 | 9  | 2   | 31.73  | 2.09 |
| 3 | 9  | 2   | 26.31  | 1.68 |
| 3 | 9  | 2   | 30.64  | 1.97 |
| 3 | 9  | 3   | 23.71  | 1.38 |
| 3 | 10 | -10 | 91.71  | 2.99 |
| 3 | 10 | -10 | 79.45  | 2.60 |
| 3 | 10 | -9  | 13.93  | 1.46 |
| 3 | 10 | -9  | 15.19  | 1.29 |
| 3 | 10 | -9  | 14.09  | 1.24 |
| 3 | 10 | -8  | 120.89 | 3.90 |
| 3 | 10 | -8  | 115.95 | 4.01 |
| 3 | 10 | -7  | 26.39  | 1.95 |
| 3 | 10 | -7  | 30.28  | 2.26 |
| 3 | 10 | -7  | 27.55  | 1.90 |
| 3 | 10 | -7  | 26.68  | 2.06 |
| 3 | 10 | -6  | 172.68 | 5.04 |

## CIF 31

|   |     |    |        |      |
|---|-----|----|--------|------|
| 3 | 10  | -6 | 178.22 | 5.33 |
| 3 | 10  | -6 | 186.87 | 5.06 |
| 3 | 10  | -5 | 7.29   | 1.38 |
| 3 | 10  | -5 | 11.62  | 1.62 |
| 3 | 10  | -5 | 10.55  | 1.72 |
| 3 | 10  | -5 | 6.84   | 1.35 |
| 3 | 10  | -5 | 6.18   | 1.12 |
| 3 | 10  | -5 | 7.13   | 1.22 |
| 3 | 10  | -4 | 8.29   | 1.34 |
| 3 | 10  | -4 | 7.52   | 1.27 |
| 3 | 10  | -4 | 10.18  | 1.59 |
| 3 | 10  | -4 | 9.89   | 1.68 |
| 3 | 10  | -4 | 8.59   | 1.41 |
| 3 | 10  | -4 | 7.73   | 1.16 |
| 3 | 10  | -3 | 7.30   | 1.18 |
| 3 | 10  | -3 | 8.90   | 1.54 |
| 3 | 10  | -3 | 7.86   | 1.47 |
| 3 | 10  | -3 | 8.11   | 1.33 |
| 3 | 10  | -2 | 65.14  | 2.58 |
| 3 | 10  | -2 | 70.63  | 3.03 |
| 3 | 10  | -2 | 56.24  | 2.40 |
| 3 | 10  | -2 | 61.18  | 2.88 |
| 3 | 10  | -2 | 68.74  | 2.98 |
| 3 | 10  | -1 | 53.44  | 2.56 |
| 3 | 10  | -1 | 44.56  | 2.17 |
| 3 | 10  | -1 | 53.33  | 2.59 |
| 3 | 10  | -1 | 40.25  | 2.06 |
| 3 | 10  | -1 | 50.00  | 2.30 |
| 3 | 10  | 0  | 5.06   | 0.88 |
| 3 | 10  | 0  | 5.73   | 0.93 |
| 3 | 10  | 1  | 126.26 | 3.07 |
| 3 | 11  | -7 | 9.13   | 0.96 |
| 3 | 11  | -6 | 56.41  | 2.02 |
| 3 | 11  | -6 | 65.76  | 2.43 |
| 3 | 11  | -5 | 7.22   | 0.92 |
| 3 | 11  | -4 | 68.63  | 2.38 |
| 3 | 11  | -4 | 67.91  | 2.37 |
| 4 | -13 | -1 | 21.34  | 1.20 |
| 4 | -13 | -1 | 22.31  | 1.15 |
| 4 | -13 | 0  | 125.43 | 3.10 |
| 4 | -13 | 0  | 124.32 | 3.01 |



## CIF 31

|       |    |        |      |
|-------|----|--------|------|
| 4 -13 | 1  | 1.42   | 0.51 |
| 4 -13 | 1  | 2.10   | 0.66 |
| 4 -13 | 1  | 3.51   | 0.71 |
| 4 -13 | 2  | 52.74  | 2.10 |
| 4 -13 | 2  | 55.74  | 1.87 |
| 4 -13 | 3  | 55.59  | 1.76 |
| 4 -13 | 4  | 0.13   | 0.45 |
| 4 -13 | 4  | 0.86   | 0.55 |
| 4 -13 | 5  | 37.26  | 1.33 |
| 4 -13 | 5  | 35.23  | 1.56 |
| 4 -13 | 6  | 238.31 | 3.91 |
| 4 -12 | -4 | 22.34  | 1.32 |
| 4 -12 | -3 | 1.82   | 0.41 |
| 4 -12 | -3 | 2.10   | 0.73 |
| 4 -12 | -3 | 1.76   | 0.43 |
| 4 -12 | -3 | 2.10   | 0.70 |
| 4 -12 | -2 | 9.85   | 1.22 |
| 4 -12 | -2 | 8.20   | 0.92 |
| 4 -12 | -2 | 9.15   | 1.15 |
| 4 -12 | -2 | 6.65   | 0.74 |
| 4 -12 | -1 | 473.35 | 8.23 |
| 4 -12 | -1 | 449.47 | 7.23 |
| 4 -12 | -1 | 466.11 | 7.92 |
| 4 -12 | 0  | 60.51  | 2.54 |
| 4 -12 | 0  | 61.01  | 2.83 |
| 4 -12 | 0  | 57.22  | 2.44 |
| 4 -12 | 1  | 4.54   | 0.95 |
| 4 -12 | 1  | 5.48   | 0.97 |
| 4 -12 | 1  | 5.63   | 1.05 |
| 4 -12 | 2  | 6.01   | 1.05 |
| 4 -12 | 2  | 6.79   | 1.06 |
| 4 -12 | 2  | 5.61   | 1.03 |
| 4 -12 | 2  | 6.94   | 1.20 |
| 4 -12 | 2  | 6.74   | 0.98 |
| 4 -12 | 3  | 44.18  | 2.23 |
| 4 -12 | 3  | 41.70  | 2.23 |
| 4 -12 | 3  | 44.20  | 2.36 |
| 4 -12 | 4  | 36.83  | 2.03 |
| 4 -12 | 4  | 35.25  | 1.68 |
| 4 -12 | 4  | 38.63  | 2.13 |
| 4 -12 | 4  | 35.31  | 1.86 |

## CIF 31

|   |     |    |        |      |
|---|-----|----|--------|------|
| 4 | -12 | 4  | 40.11  | 2.26 |
| 4 | -12 | 5  | 60.61  | 2.46 |
| 4 | -12 | 5  | 56.72  | 2.07 |
| 4 | -12 | 5  | 56.49  | 2.50 |
| 4 | -12 | 5  | 64.07  | 2.34 |
| 4 | -12 | 5  | 63.54  | 2.70 |
| 4 | -12 | 6  | 3.93   | 0.89 |
| 4 | -12 | 6  | 3.56   | 0.65 |
| 4 | -12 | 6  | 3.64   | 0.80 |
| 4 | -12 | 6  | 3.84   | 0.92 |
| 4 | -12 | 7  | 63.90  | 2.30 |
| 4 | -12 | 7  | 62.06  | 2.22 |
| 4 | -12 | 7  | 54.88  | 2.20 |
| 4 | -12 | 7  | 51.77  | 1.50 |
| 4 | -12 | 7  | 63.40  | 2.33 |
| 4 | -12 | 8  | 268.89 | 4.51 |
| 4 | -12 | 8  | 244.37 | 4.39 |
| 4 | -12 | 9  | 76.77  | 1.92 |
| 4 | -12 | 9  | 86.92  | 2.16 |
| 4 | -11 | -6 | 8.10   | 0.78 |
| 4 | -11 | -5 | 58.46  | 2.58 |
| 4 | -11 | -5 | 55.18  | 2.18 |
| 4 | -11 | -4 | 4.40   | 0.83 |
| 4 | -11 | -4 | 3.95   | 1.07 |
| 4 | -11 | -4 | 4.31   | 0.90 |
| 4 | -11 | -4 | 3.91   | 1.00 |
| 4 | -11 | -4 | 3.77   | 0.86 |
| 4 | -11 | -3 | 8.38   | 1.39 |
| 4 | -11 | -3 | 5.97   | 1.08 |
| 4 | -11 | -3 | 8.44   | 1.38 |
| 4 | -11 | -3 | 8.87   | 1.19 |
| 4 | -11 | -3 | 11.35  | 1.04 |
| 4 | -11 | -2 | 22.79  | 2.06 |
| 4 | -11 | -2 | 25.84  | 1.98 |
| 4 | -11 | -2 | 25.68  | 2.11 |
| 4 | -11 | -2 | 21.89  | 1.83 |
| 4 | -11 | -2 | 21.20  | 1.54 |
| 4 | -11 | -1 | 2.41   | 0.94 |
| 4 | -11 | -1 | 3.97   | 1.00 |
| 4 | -11 | 0  | 169.33 | 4.87 |
| 4 | -11 | 0  | 171.08 | 5.06 |

## CIF 31

|       |   |        |      |
|-------|---|--------|------|
| 4 -11 | 0 | 176.03 | 5.25 |
| 4 -11 | 1 | 403.24 | 7.94 |
| 4 -11 | 1 | 384.09 | 7.26 |
| 4 -11 | 1 | 391.29 | 8.15 |
| 4 -11 | 1 | 389.98 | 7.79 |
| 4 -11 | 1 | 405.66 | 7.59 |
| 4 -11 | 2 | 16.72  | 1.74 |
| 4 -11 | 2 | 14.62  | 1.49 |
| 4 -11 | 2 | 13.26  | 1.63 |
| 4 -11 | 2 | 15.73  | 1.78 |
| 4 -11 | 2 | 12.46  | 1.47 |
| 4 -11 | 3 | 122.31 | 4.24 |
| 4 -11 | 3 | 123.89 | 3.95 |
| 4 -11 | 3 | 127.99 | 4.30 |
| 4 -11 | 3 | 120.38 | 3.87 |
| 4 -11 | 3 | 122.87 | 4.34 |
| 4 -11 | 3 | 111.71 | 3.70 |
| 4 -11 | 3 | 122.29 | 4.42 |
| 4 -11 | 3 | 117.68 | 4.01 |
| 4 -11 | 3 | 117.45 | 3.69 |
| 4 -11 | 3 | 137.45 | 4.18 |
| 4 -11 | 3 | 116.60 | 4.07 |
| 4 -11 | 4 | 152.57 | 4.68 |
| 4 -11 | 4 | 143.25 | 4.27 |
| 4 -11 | 4 | 146.17 | 4.61 |
| 4 -11 | 4 | 137.91 | 4.19 |
| 4 -11 | 4 | 168.49 | 5.01 |
| 4 -11 | 4 | 135.46 | 4.13 |
| 4 -11 | 4 | 145.65 | 4.71 |
| 4 -11 | 4 | 124.55 | 4.06 |
| 4 -11 | 4 | 125.91 | 3.78 |
| 4 -11 | 4 | 137.29 | 4.13 |
| 4 -11 | 4 | 124.65 | 3.80 |
| 4 -11 | 4 | 135.19 | 4.47 |
| 4 -11 | 5 | 392.77 | 7.73 |
| 4 -11 | 5 | 397.11 | 7.35 |
| 4 -11 | 5 | 376.67 | 7.55 |
| 4 -11 | 5 | 378.65 | 7.22 |
| 4 -11 | 5 | 384.36 | 7.84 |
| 4 -11 | 5 | 386.42 | 7.32 |
| 4 -11 | 5 | 370.11 | 7.07 |

## CIF 31

|       |    |        |      |
|-------|----|--------|------|
| 4 -11 | 5  | 362.88 | 6.81 |
| 4 -11 | 5  | 369.96 | 7.74 |
| 4 -11 | 6  | 79.49  | 3.27 |
| 4 -11 | 6  | 65.19  | 3.05 |
| 4 -11 | 6  | 77.74  | 3.15 |
| 4 -11 | 6  | 83.10  | 3.28 |
| 4 -11 | 6  | 79.63  | 3.23 |
| 4 -11 | 6  | 74.96  | 3.00 |
| 4 -11 | 6  | 74.60  | 3.22 |
| 4 -11 | 6  | 78.95  | 3.11 |
| 4 -11 | 6  | 78.85  | 2.78 |
| 4 -11 | 6  | 79.00  | 3.25 |
| 4 -11 | 7  | 87.60  | 3.30 |
| 4 -11 | 7  | 86.98  | 3.17 |
| 4 -11 | 7  | 84.29  | 3.17 |
| 4 -11 | 7  | 79.55  | 2.97 |
| 4 -11 | 7  | 76.58  | 3.13 |
| 4 -11 | 7  | 89.44  | 3.21 |
| 4 -11 | 7  | 73.13  | 2.33 |
| 4 -11 | 7  | 79.77  | 3.12 |
| 4 -11 | 8  | 232.22 | 5.10 |
| 4 -11 | 8  | 229.93 | 4.91 |
| 4 -11 | 8  | 221.23 | 5.02 |
| 4 -11 | 8  | 216.49 | 4.72 |
| 4 -11 | 8  | 199.11 | 4.88 |
| 4 -11 | 8  | 193.05 | 4.59 |
| 4 -11 | 8  | 231.92 | 4.94 |
| 4 -11 | 9  | 8.17   | 1.04 |
| 4 -11 | 9  | 7.91   | 0.94 |
| 4 -11 | 9  | 8.20   | 1.00 |
| 4 -11 | 9  | 6.89   | 0.88 |
| 4 -11 | 9  | 7.03   | 0.96 |
| 4 -11 | 9  | 8.02   | 0.97 |
| 4 -11 | 10 | 58.07  | 1.97 |
| 4 -11 | 10 | 57.39  | 1.92 |
| 4 -11 | 10 | 46.39  | 1.57 |
| 4 -11 | 10 | 47.49  | 1.55 |
| 4 -10 | -8 | 10.76  | 0.96 |
| 4 -10 | -7 | 198.78 | 3.78 |
| 4 -10 | -6 | 13.41  | 1.34 |
| 4 -10 | -6 | 12.01  | 1.51 |

## CIF 31

|   |     |    |        |      |
|---|-----|----|--------|------|
| 4 | -10 | -6 | 10.25  | 1.22 |
| 4 | -10 | -6 | 10.34  | 1.24 |
| 4 | -10 | -5 | 143.15 | 4.77 |
| 4 | -10 | -5 | 137.12 | 4.31 |
| 4 | -10 | -5 | 135.02 | 4.54 |
| 4 | -10 | -5 | 130.36 | 4.32 |
| 4 | -10 | -4 | 6.71   | 1.36 |
| 4 | -10 | -4 | 5.33   | 1.15 |
| 4 | -10 | -4 | 6.53   | 1.37 |
| 4 | -10 | -4 | 7.20   | 1.27 |
| 4 | -10 | -4 | 9.32   | 1.00 |
| 4 | -10 | -4 | 6.95   | 1.27 |
| 4 | -10 | -3 | 416.08 | 8.99 |
| 4 | -10 | -3 | 416.03 | 8.54 |
| 4 | -10 | -3 | 410.08 | 8.40 |
| 4 | -10 | -3 | 375.32 | 7.65 |
| 4 | -10 | -3 | 370.97 | 6.84 |
| 4 | -10 | -3 | 393.60 | 7.63 |
| 4 | -10 | -2 | 95.40  | 4.02 |
| 4 | -10 | -2 | 102.06 | 3.73 |
| 4 | -10 | -2 | 109.43 | 3.88 |
| 4 | -10 | -1 | 32.22  | 2.36 |
| 4 | -10 | -1 | 34.06  | 2.46 |
| 4 | -10 | -1 | 28.75  | 1.95 |
| 4 | -10 | -1 | 37.64  | 2.45 |
| 4 | -10 | -1 | 34.93  | 2.52 |
| 4 | -10 | -1 | 32.66  | 2.37 |
| 4 | -10 | -1 | 29.95  | 2.10 |
| 4 | -10 | -1 | 32.34  | 2.01 |
| 4 | -10 | -1 | 30.95  | 2.09 |
| 4 | -10 | -1 | 34.05  | 2.22 |
| 4 | -10 | 0  | 22.42  | 2.11 |
| 4 | -10 | 0  | 21.59  | 1.92 |
| 4 | -10 | 0  | 17.82  | 1.89 |
| 4 | -10 | 0  | 19.39  | 1.69 |
| 4 | -10 | 0  | 27.13  | 2.20 |
| 4 | -10 | 0  | 18.34  | 1.98 |
| 4 | -10 | 0  | 19.21  | 1.86 |
| 4 | -10 | 0  | 19.23  | 1.64 |
| 4 | -10 | 0  | 19.73  | 1.65 |
| 4 | -10 | 0  | 27.51  | 2.04 |

## CIF 31

|       |   |        |      |
|-------|---|--------|------|
| 4 -10 | 1 | 416.74 | 8.62 |
| 4 -10 | 1 | 422.72 | 8.23 |
| 4 -10 | 1 | 387.51 | 7.89 |
| 4 -10 | 1 | 429.70 | 8.90 |
| 4 -10 | 1 | 403.28 | 7.95 |
| 4 -10 | 1 | 394.67 | 8.80 |
| 4 -10 | 1 | 458.75 | 9.02 |
| 4 -10 | 1 | 383.23 | 8.09 |
| 4 -10 | 1 | 415.05 | 7.74 |
| 4 -10 | 1 | 389.78 | 7.93 |
| 4 -10 | 1 | 379.76 | 7.70 |
| 4 -10 | 2 | 48.39  | 2.77 |
| 4 -10 | 2 | 48.79  | 3.00 |
| 4 -10 | 2 | 54.38  | 2.98 |
| 4 -10 | 2 | 54.95  | 3.02 |
| 4 -10 | 2 | 49.37  | 2.77 |
| 4 -10 | 2 | 52.32  | 3.04 |
| 4 -10 | 2 | 51.87  | 2.79 |
| 4 -10 | 2 | 51.23  | 3.13 |
| 4 -10 | 2 | 54.60  | 3.06 |
| 4 -10 | 2 | 57.08  | 2.93 |
| 4 -10 | 2 | 58.29  | 2.80 |
| 4 -10 | 2 | 54.09  | 2.80 |
| 4 -10 | 3 | 12.42  | 1.72 |
| 4 -10 | 3 | 10.30  | 1.62 |
| 4 -10 | 3 | 10.66  | 1.61 |
| 4 -10 | 3 | 11.52  | 2.01 |
| 4 -10 | 3 | 14.79  | 1.75 |
| 4 -10 | 3 | 9.09   | 1.39 |
| 4 -10 | 3 | 8.34   | 1.51 |
| 4 -10 | 3 | 9.87   | 1.46 |
| 4 -10 | 3 | 9.71   | 1.55 |
| 4 -10 | 3 | 11.31  | 1.71 |
| 4 -10 | 3 | 10.28  | 1.46 |
| 4 -10 | 3 | 9.25   | 1.29 |
| 4 -10 | 3 | 9.62   | 1.36 |
| 4 -10 | 4 | 326.22 | 7.69 |
| 4 -10 | 4 | 310.52 | 7.35 |
| 4 -10 | 4 | 327.00 | 7.31 |
| 4 -10 | 4 | 306.10 | 7.21 |
| 4 -10 | 4 | 303.77 | 6.90 |

## CIF 31

|   |     |   |        |      |
|---|-----|---|--------|------|
| 4 | -10 | 4 | 307.48 | 7.33 |
| 4 | -10 | 4 | 281.70 | 6.86 |
| 4 | -10 | 4 | 308.60 | 7.29 |
| 4 | -10 | 4 | 287.58 | 6.62 |
| 4 | -10 | 4 | 268.99 | 6.10 |
| 4 | -10 | 4 | 314.52 | 6.70 |
| 4 | -10 | 5 | 158.26 | 5.34 |
| 4 | -10 | 5 | 150.51 | 4.94 |
| 4 | -10 | 5 | 146.43 | 4.74 |
| 4 | -10 | 5 | 146.90 | 4.93 |
| 4 | -10 | 5 | 149.68 | 4.76 |
| 4 | -10 | 5 | 135.95 | 4.81 |
| 4 | -10 | 5 | 125.34 | 4.63 |
| 4 | -10 | 5 | 158.77 | 5.37 |
| 4 | -10 | 5 | 138.26 | 4.71 |
| 4 | -10 | 5 | 150.12 | 4.55 |
| 4 | -10 | 5 | 168.30 | 4.53 |
| 4 | -10 | 5 | 164.27 | 4.59 |
| 4 | -10 | 5 | 121.92 | 6.48 |
| 4 | -10 | 6 | 4.06   | 1.41 |
| 4 | -10 | 6 | 2.90   | 0.84 |
| 4 | -10 | 6 | 5.99   | 1.38 |
| 4 | -10 | 6 | 3.68   | 1.07 |
| 4 | -10 | 6 | 5.23   | 1.31 |
| 4 | -10 | 6 | 3.45   | 1.15 |
| 4 | -10 | 6 | 4.00   | 1.10 |
| 4 | -10 | 6 | 4.75   | 1.32 |
| 4 | -10 | 6 | 2.92   | 0.89 |
| 4 | -10 | 6 | 8.00   | 4.40 |
| 4 | -10 | 7 | 139.15 | 4.52 |
| 4 | -10 | 7 | 144.44 | 4.46 |
| 4 | -10 | 7 | 150.34 | 4.73 |
| 4 | -10 | 7 | 145.44 | 4.83 |
| 4 | -10 | 7 | 156.33 | 4.71 |
| 4 | -10 | 7 | 127.90 | 3.43 |
| 4 | -10 | 7 | 116.36 | 6.33 |
| 4 | -10 | 8 | 14.37  | 2.19 |
| 4 | -10 | 8 | 14.28  | 1.58 |
| 4 | -10 | 8 | 13.75  | 1.50 |
| 4 | -10 | 8 | 15.54  | 1.64 |
| 4 | -10 | 8 | 14.67  | 1.62 |

## CIF 31

|   |     |    |         |       |
|---|-----|----|---------|-------|
| 4 | -10 | 8  | 13.06   | 1.46  |
| 4 | -10 | 8  | 9.27    | 3.81  |
| 4 | -10 | 9  | 8.65    | 1.23  |
| 4 | -10 | 9  | 9.95    | 1.21  |
| 4 | -10 | 9  | 9.10    | 1.25  |
| 4 | -10 | 9  | 6.65    | 1.15  |
| 4 | -10 | 9  | 7.64    | 1.12  |
| 4 | -10 | 10 | 187.54  | 4.24  |
| 4 | -10 | 10 | 177.25  | 3.96  |
| 4 | -10 | 10 | 186.18  | 4.35  |
| 4 | -10 | 10 | 177.00  | 3.89  |
| 4 | -10 | 11 | 1.52    | 0.57  |
| 4 | -10 | 11 | 1.10    | 0.44  |
| 4 | -10 | 11 | 2.08    | 0.61  |
| 4 | -9  | -9 | 93.69   | 2.47  |
| 4 | -9  | -9 | 89.85   | 2.43  |
| 4 | -9  | -8 | 14.39   | 1.16  |
| 4 | -9  | -8 | 18.03   | 1.43  |
| 4 | -9  | -8 | 16.33   | 1.07  |
| 4 | -9  | -8 | 17.22   | 1.40  |
| 4 | -9  | -7 | 426.26  | 6.42  |
| 4 | -9  | -7 | 419.95  | 8.75  |
| 4 | -9  | -7 | 431.19  | 8.30  |
| 4 | -9  | -7 | 417.90  | 8.20  |
| 4 | -9  | -6 | 32.26   | 1.66  |
| 4 | -9  | -6 | 25.80   | 2.26  |
| 4 | -9  | -6 | 28.60   | 2.26  |
| 4 | -9  | -6 | 30.05   | 2.26  |
| 4 | -9  | -5 | 304.29  | 7.68  |
| 4 | -9  | -5 | 294.05  | 7.28  |
| 4 | -9  | -5 | 278.22  | 7.06  |
| 4 | -9  | -5 | 292.92  | 6.18  |
| 4 | -9  | -4 | 1250.93 | 18.04 |
| 4 | -9  | -4 | 1302.80 | 17.62 |
| 4 | -9  | -4 | 1252.97 | 17.41 |
| 4 | -9  | -4 | 1231.64 | 15.92 |
| 4 | -9  | -4 | 1209.15 | 16.06 |
| 4 | -9  | -4 | 1263.43 | 15.78 |
| 4 | -9  | -4 | 1216.27 | 16.29 |
| 4 | -9  | -4 | 1204.42 | 14.82 |
| 4 | -9  | -3 | 115.28  | 4.49  |



## CIF 31

|   |    |    |         |       |
|---|----|----|---------|-------|
| 4 | -9 | -3 | 111.10  | 3.93  |
| 4 | -9 | -3 | 103.65  | 3.88  |
| 4 | -9 | -3 | 109.88  | 3.84  |
| 4 | -9 | -3 | 94.64   | 3.73  |
| 4 | -9 | -3 | 96.82   | 3.51  |
| 4 | -9 | -2 | 1360.99 | 18.21 |
| 4 | -9 | -2 | 1416.21 | 17.95 |
| 4 | -9 | -2 | 1452.90 | 19.03 |
| 4 | -9 | -2 | 1329.63 | 17.27 |
| 4 | -9 | -2 | 1326.22 | 17.60 |
| 4 | -9 | -2 | 1454.43 | 18.92 |
| 4 | -9 | -2 | 1366.77 | 17.25 |
| 4 | -9 | -2 | 1556.00 | 17.82 |
| 4 | -9 | -2 | 1462.15 | 17.60 |
| 4 | -9 | -2 | 1347.34 | 17.04 |
| 4 | -9 | -1 | 512.61  | 9.60  |
| 4 | -9 | -1 | 515.39  | 9.17  |
| 4 | -9 | -1 | 481.87  | 9.65  |
| 4 | -9 | -1 | 499.76  | 8.90  |
| 4 | -9 | -1 | 449.44  | 9.09  |
| 4 | -9 | -1 | 467.36  | 9.39  |
| 4 | -9 | -1 | 500.48  | 9.26  |
| 4 | -9 | -1 | 429.41  | 8.13  |
| 4 | -9 | -1 | 500.62  | 8.82  |
| 4 | -9 | -1 | 479.40  | 8.54  |
| 4 | -9 | -1 | 444.24  | 8.40  |
| 4 | -9 | 0  | 444.13  | 8.10  |
| 4 | -9 | 0  | 439.80  | 8.41  |
| 4 | -9 | 0  | 450.59  | 8.93  |
| 4 | -9 | 0  | 461.84  | 8.66  |
| 4 | -9 | 0  | 435.41  | 8.47  |
| 4 | -9 | 0  | 443.77  | 8.52  |
| 4 | -9 | 0  | 442.49  | 9.07  |
| 4 | -9 | 0  | 457.58  | 9.05  |
| 4 | -9 | 0  | 466.65  | 8.80  |
| 4 | -9 | 0  | 428.56  | 7.76  |
| 4 | -9 | 0  | 426.83  | 8.18  |
| 4 | -9 | 0  | 407.50  | 7.67  |
| 4 | -9 | 1  | 350.44  | 7.55  |
| 4 | -9 | 1  | 349.66  | 7.38  |
| 4 | -9 | 1  | 371.46  | 8.02  |

## CIF 31

|   |    |   |        |      |
|---|----|---|--------|------|
| 4 | -9 | 1 | 389.90 | 8.08 |
| 4 | -9 | 1 | 395.30 | 7.99 |
| 4 | -9 | 1 | 394.07 | 8.14 |
| 4 | -9 | 1 | 373.21 | 7.73 |
| 4 | -9 | 1 | 421.28 | 8.59 |
| 4 | -9 | 1 | 377.15 | 7.85 |
| 4 | -9 | 1 | 372.83 | 8.34 |
| 4 | -9 | 1 | 374.92 | 8.11 |
| 4 | -9 | 1 | 361.39 | 7.66 |
| 4 | -9 | 1 | 358.00 | 6.71 |
| 4 | -9 | 1 | 351.88 | 7.23 |
| 4 | -9 | 2 | 119.01 | 4.57 |
| 4 | -9 | 2 | 110.15 | 3.94 |
| 4 | -9 | 2 | 139.98 | 4.68 |
| 4 | -9 | 2 | 132.88 | 4.48 |
| 4 | -9 | 2 | 132.77 | 4.63 |
| 4 | -9 | 2 | 127.56 | 4.38 |
| 4 | -9 | 2 | 139.86 | 4.87 |
| 4 | -9 | 2 | 119.86 | 4.36 |
| 4 | -9 | 2 | 120.03 | 4.04 |
| 4 | -9 | 2 | 126.41 | 4.74 |
| 4 | -9 | 2 | 128.36 | 4.59 |
| 4 | -9 | 2 | 126.80 | 4.26 |
| 4 | -9 | 2 | 116.88 | 3.95 |
| 4 | -9 | 3 | 53.73  | 3.38 |
| 4 | -9 | 3 | 54.21  | 3.00 |
| 4 | -9 | 3 | 53.08  | 2.89 |
| 4 | -9 | 3 | 54.90  | 3.05 |
| 4 | -9 | 3 | 57.99  | 3.06 |
| 4 | -9 | 3 | 58.00  | 3.21 |
| 4 | -9 | 3 | 53.37  | 2.99 |
| 4 | -9 | 3 | 54.97  | 3.21 |
| 4 | -9 | 3 | 59.66  | 3.14 |
| 4 | -9 | 3 | 59.10  | 2.93 |
| 4 | -9 | 3 | 47.83  | 3.42 |
| 4 | -9 | 3 | 49.20  | 2.67 |
| 4 | -9 | 4 | 16.57  | 2.34 |
| 4 | -9 | 4 | 15.10  | 1.78 |
| 4 | -9 | 4 | 17.53  | 1.80 |
| 4 | -9 | 4 | 16.34  | 1.90 |
| 4 | -9 | 4 | 14.35  | 1.82 |

## CIF 31

|   |    |    |        |      |
|---|----|----|--------|------|
| 4 | -9 | 4  | 15.23  | 1.75 |
| 4 | -9 | 4  | 14.93  | 1.59 |
| 4 | -9 | 4  | 15.10  | 1.49 |
| 4 | -9 | 4  | 15.57  | 2.72 |
| 4 | -9 | 4  | 15.87  | 1.60 |
| 4 | -9 | 5  | 173.82 | 5.86 |
| 4 | -9 | 5  | 174.93 | 5.34 |
| 4 | -9 | 5  | 167.26 | 5.09 |
| 4 | -9 | 5  | 171.32 | 5.46 |
| 4 | -9 | 5  | 175.97 | 5.62 |
| 4 | -9 | 5  | 171.66 | 5.62 |
| 4 | -9 | 5  | 179.94 | 5.36 |
| 4 | -9 | 5  | 178.48 | 5.05 |
| 4 | -9 | 5  | 167.59 | 4.62 |
| 4 | -9 | 5  | 179.78 | 4.86 |
| 4 | -9 | 5  | 160.89 | 5.91 |
| 4 | -9 | 6  | 89.76  | 3.69 |
| 4 | -9 | 6  | 85.25  | 3.98 |
| 4 | -9 | 6  | 82.37  | 3.84 |
| 4 | -9 | 6  | 91.46  | 3.81 |
| 4 | -9 | 6  | 85.54  | 3.42 |
| 4 | -9 | 6  | 78.94  | 3.03 |
| 4 | -9 | 6  | 76.87  | 4.34 |
| 4 | -9 | 7  | 50.97  | 3.27 |
| 4 | -9 | 7  | 51.44  | 2.80 |
| 4 | -9 | 7  | 51.47  | 2.94 |
| 4 | -9 | 7  | 45.70  | 2.72 |
| 4 | -9 | 7  | 49.92  | 2.57 |
| 4 | -9 | 7  | 55.04  | 2.27 |
| 4 | -9 | 7  | 54.42  | 4.45 |
| 4 | -9 | 8  | 7.80   | 1.50 |
| 4 | -9 | 8  | 8.79   | 1.34 |
| 4 | -9 | 8  | 8.12   | 1.39 |
| 4 | -9 | 8  | 7.17   | 3.60 |
| 4 | -9 | 9  | 18.29  | 1.65 |
| 4 | -9 | 9  | 14.25  | 1.52 |
| 4 | -9 | 9  | 13.61  | 4.06 |
| 4 | -9 | 10 | 17.93  | 2.44 |
| 4 | -9 | 10 | 17.86  | 1.48 |
| 4 | -9 | 10 | 16.27  | 1.41 |
| 4 | -9 | 11 | 10.59  | 1.00 |

## CIF 31

|   |    |     |        |       |
|---|----|-----|--------|-------|
| 4 | -9 | 11  | 8.06   | 1.06  |
| 4 | -9 | 11  | 7.57   | 0.82  |
| 4 | -9 | 12  | 14.13  | 0.92  |
| 4 | -8 | -10 | 0.93   | 0.44  |
| 4 | -8 | -10 | 1.56   | 0.67  |
| 4 | -8 | -10 | 1.08   | 0.57  |
| 4 | -8 | -10 | 1.13   | 0.57  |
| 4 | -8 | -9  | 0.46   | 0.58  |
| 4 | -8 | -9  | 0.43   | 0.78  |
| 4 | -8 | -9  | 0.61   | 0.68  |
| 4 | -8 | -9  | 1.06   | 0.75  |
| 4 | -8 | -8  | 245.87 | 5.16  |
| 4 | -8 | -8  | 232.72 | 6.20  |
| 4 | -8 | -8  | 251.17 | 5.73  |
| 4 | -8 | -7  | 165.08 | 4.35  |
| 4 | -8 | -7  | 172.26 | 5.75  |
| 4 | -8 | -7  | 169.38 | 5.52  |
| 4 | -8 | -7  | 163.87 | 5.41  |
| 4 | -8 | -7  | 175.27 | 4.95  |
| 4 | -8 | -6  | 416.43 | 7.36  |
| 4 | -8 | -6  | 456.79 | 9.83  |
| 4 | -8 | -6  | 484.10 | 9.66  |
| 4 | -8 | -6  | 430.58 | 9.22  |
| 4 | -8 | -6  | 468.62 | 8.74  |
| 4 | -8 | -6  | 433.96 | 8.37  |
| 4 | -8 | -6  | 445.49 | 8.40  |
| 4 | -8 | -6  | 390.07 | 8.15  |
| 4 | -8 | -5  | 608.75 | 9.12  |
| 4 | -8 | -5  | 658.98 | 12.11 |
| 4 | -8 | -5  | 667.75 | 11.81 |
| 4 | -8 | -5  | 627.64 | 11.46 |
| 4 | -8 | -5  | 615.37 | 10.62 |
| 4 | -8 | -5  | 646.04 | 10.62 |
| 4 | -8 | -5  | 659.73 | 10.73 |
| 4 | -8 | -4  | 283.63 | 5.65  |
| 4 | -8 | -4  | 402.45 | 8.59  |
| 4 | -8 | -4  | 354.78 | 8.30  |
| 4 | -8 | -4  | 343.29 | 8.01  |
| 4 | -8 | -4  | 392.80 | 7.76  |
| 4 | -8 | -4  | 382.47 | 7.63  |
| 4 | -8 | -4  | 351.07 | 7.22  |

## CIF 31

|   |    |    |         |       |
|---|----|----|---------|-------|
| 4 | -8 | -4 | 309.05  | 6.30  |
| 4 | -8 | -3 | 910.44  | 12.90 |
| 4 | -8 | -3 | 1019.57 | 14.66 |
| 4 | -8 | -3 | 1070.40 | 15.27 |
| 4 | -8 | -3 | 1089.42 | 14.50 |
| 4 | -8 | -3 | 1059.73 | 15.03 |
| 4 | -8 | -3 | 978.10  | 13.64 |
| 4 | -8 | -3 | 1084.08 | 14.28 |
| 4 | -8 | -3 | 967.56  | 13.53 |
| 4 | -8 | -2 | 111.95  | 4.18  |
| 4 | -8 | -2 | 122.02  | 4.20  |
| 4 | -8 | -2 | 129.22  | 4.59  |
| 4 | -8 | -2 | 123.75  | 4.16  |
| 4 | -8 | -2 | 111.01  | 3.92  |
| 4 | -8 | -2 | 105.99  | 4.07  |
| 4 | -8 | -2 | 105.85  | 3.92  |
| 4 | -8 | -2 | 115.41  | 3.82  |
| 4 | -8 | -2 | 114.42  | 3.96  |
| 4 | -8 | -2 | 129.45  | 4.05  |
| 4 | -8 | -1 | 54.39   | 2.62  |
| 4 | -8 | -1 | 64.83   | 3.19  |
| 4 | -8 | -1 | 60.43   | 3.02  |
| 4 | -8 | -1 | 65.21   | 3.01  |
| 4 | -8 | -1 | 69.53   | 3.30  |
| 4 | -8 | -1 | 69.54   | 3.13  |
| 4 | -8 | -1 | 66.47   | 2.77  |
| 4 | -8 | -1 | 52.91   | 2.78  |
| 4 | -8 | -1 | 68.66   | 3.23  |
| 4 | -8 | -1 | 65.45   | 3.04  |
| 4 | -8 | -1 | 59.31   | 2.64  |
| 4 | -8 | -1 | 70.53   | 3.08  |
| 4 | -8 | -1 | 56.12   | 2.59  |
| 4 | -8 | 0  | 1219.14 | 16.21 |
| 4 | -8 | 0  | 1375.15 | 17.18 |
| 4 | -8 | 0  | 1365.75 | 17.12 |
| 4 | -8 | 0  | 1352.99 | 16.99 |
| 4 | -8 | 0  | 1404.13 | 17.25 |
| 4 | -8 | 0  | 1406.24 | 17.05 |
| 4 | -8 | 0  | 1507.83 | 18.04 |
| 4 | -8 | 0  | 1305.73 | 16.76 |
| 4 | -8 | 0  | 1341.03 | 16.16 |

## CIF 31

|   |    |   |         |       |
|---|----|---|---------|-------|
| 4 | -8 | 0 | 1321.97 | 17.39 |
| 4 | -8 | 0 | 1329.56 | 17.10 |
| 4 | -8 | 0 | 1251.37 | 16.27 |
| 4 | -8 | 0 | 1305.37 | 15.43 |
| 4 | -8 | 0 | 1201.44 | 15.66 |
| 4 | -8 | 0 | 1323.38 | 15.60 |
| 4 | -8 | 1 | 13.52   | 1.84  |
| 4 | -8 | 1 | 17.72   | 1.71  |
| 4 | -8 | 1 | 15.20   | 1.59  |
| 4 | -8 | 1 | 18.93   | 1.81  |
| 4 | -8 | 1 | 17.90   | 1.73  |
| 4 | -8 | 1 | 16.82   | 1.78  |
| 4 | -8 | 1 | 18.25   | 1.83  |
| 4 | -8 | 1 | 16.75   | 1.88  |
| 4 | -8 | 1 | 19.07   | 1.76  |
| 4 | -8 | 1 | 15.97   | 1.56  |
| 4 | -8 | 1 | 15.32   | 1.29  |
| 4 | -8 | 1 | 16.10   | 1.49  |
| 4 | -8 | 1 | 14.77   | 1.27  |
| 4 | -8 | 1 | 19.90   | 1.61  |
| 4 | -8 | 1 | 17.50   | 1.48  |
| 4 | -8 | 2 | 620.98  | 10.70 |
| 4 | -8 | 2 | 645.28  | 10.61 |
| 4 | -8 | 2 | 694.68  | 10.69 |
| 4 | -8 | 2 | 632.84  | 10.61 |
| 4 | -8 | 2 | 630.16  | 10.51 |
| 4 | -8 | 2 | 646.92  | 10.87 |
| 4 | -8 | 2 | 684.98  | 11.14 |
| 4 | -8 | 2 | 634.66  | 10.49 |
| 4 | -8 | 2 | 636.04  | 11.17 |
| 4 | -8 | 2 | 621.92  | 9.88  |
| 4 | -8 | 2 | 640.84  | 8.70  |
| 4 | -8 | 2 | 652.31  | 9.72  |
| 4 | -8 | 3 | 431.25  | 8.62  |
| 4 | -8 | 3 | 440.97  | 8.35  |
| 4 | -8 | 3 | 419.34  | 8.02  |
| 4 | -8 | 3 | 419.54  | 8.28  |
| 4 | -8 | 3 | 358.51  | 8.04  |
| 4 | -8 | 3 | 413.89  | 8.15  |
| 4 | -8 | 3 | 368.63  | 8.41  |
| 4 | -8 | 3 | 441.76  | 7.88  |

## CIF 31

|   |    |     |        |      |
|---|----|-----|--------|------|
| 4 | -8 | 3   | 420.43 | 7.41 |
| 4 | -8 | 3   | 480.26 | 8.30 |
| 4 | -8 | 4   | 24.45  | 2.16 |
| 4 | -8 | 4   | 19.57  | 1.66 |
| 4 | -8 | 4   | 23.75  | 1.93 |
| 4 | -8 | 4   | 24.23  | 1.98 |
| 4 | -8 | 4   | 20.33  | 2.03 |
| 4 | -8 | 4   | 24.46  | 1.84 |
| 4 | -8 | 4   | 24.76  | 1.99 |
| 4 | -8 | 5   | 1.60   | 1.12 |
| 4 | -8 | 5   | 0.84   | 0.73 |
| 4 | -8 | 5   | 1.02   | 0.88 |
| 4 | -8 | 5   | 0.85   | 0.71 |
| 4 | -8 | 5   | 0.67   | 0.94 |
| 4 | -8 | 5   | 1.39   | 0.81 |
| 4 | -8 | 5   | 0.25   | 0.90 |
| 4 | -8 | 5   | 0.81   | 0.93 |
| 4 | -8 | 6   | 13.03  | 1.74 |
| 4 | -8 | 6   | 9.45   | 1.35 |
| 4 | -8 | 6   | 13.69  | 1.66 |
| 4 | -8 | 6   | 10.83  | 1.56 |
| 4 | -8 | 6   | 12.69  | 1.45 |
| 4 | -8 | 6   | 13.15  | 1.31 |
| 4 | -8 | 6   | 13.45  | 1.74 |
| 4 | -8 | 7   | 278.30 | 7.21 |
| 4 | -8 | 7   | 272.15 | 6.20 |
| 4 | -8 | 8   | 213.80 | 6.20 |
| 4 | -8 | 8   | 205.64 | 5.72 |
| 4 | -8 | 8   | 211.95 | 5.27 |
| 4 | -8 | 8   | 221.68 | 6.66 |
| 4 | -8 | 9   | 131.07 | 4.52 |
| 4 | -8 | 10  | 15.79  | 1.71 |
| 4 | -8 | 10  | 13.78  | 1.40 |
| 4 | -8 | 10  | 14.74  | 3.02 |
| 4 | -8 | 11  | 176.59 | 4.09 |
| 4 | -8 | 11  | 162.25 | 4.48 |
| 4 | -8 | 11  | 165.50 | 3.81 |
| 4 | -8 | 12  | 104.47 | 2.45 |
| 4 | -7 | -12 | 5.13   | 0.70 |
| 4 | -7 | -12 | 3.19   | 0.53 |
| 4 | -7 | -11 | 39.00  | 1.56 |

## CIF 31

|   |    |     |         |       |
|---|----|-----|---------|-------|
| 4 | -7 | -11 | 34.26   | 1.55  |
| 4 | -7 | -11 | 40.41   | 1.78  |
| 4 | -7 | -11 | 39.83   | 1.64  |
| 4 | -7 | -10 | 24.67   | 1.65  |
| 4 | -7 | -10 | 28.62   | 1.72  |
| 4 | -7 | -10 | 27.80   | 1.72  |
| 4 | -7 | -10 | 29.20   | 1.75  |
| 4 | -7 | -9  | 0.36    | 0.72  |
| 4 | -7 | -9  | 1.66    | 0.87  |
| 4 | -7 | -9  | 1.22    | 0.92  |
| 4 | -7 | -9  | 1.63    | 1.05  |
| 4 | -7 | -8  | 541.68  | 8.99  |
| 4 | -7 | -8  | 531.26  | 10.63 |
| 4 | -7 | -8  | 518.79  | 10.55 |
| 4 | -7 | -8  | 521.96  | 9.78  |
| 4 | -7 | -8  | 528.65  | 9.16  |
| 4 | -7 | -7  | 179.24  | 4.78  |
| 4 | -7 | -7  | 174.86  | 5.87  |
| 4 | -7 | -7  | 170.48  | 5.70  |
| 4 | -7 | -7  | 174.86  | 5.79  |
| 4 | -7 | -7  | 170.81  | 5.31  |
| 4 | -7 | -7  | 161.80  | 4.81  |
| 4 | -7 | -7  | 196.57  | 5.43  |
| 4 | -7 | -7  | 172.93  | 5.23  |
| 4 | -7 | -7  | 184.23  | 5.22  |
| 4 | -7 | -6  | 2165.29 | 25.55 |
| 4 | -7 | -6  | 2021.76 | 24.90 |
| 4 | -7 | -6  | 2109.47 | 25.25 |
| 4 | -7 | -6  | 2020.15 | 24.99 |
| 4 | -7 | -6  | 2055.25 | 24.27 |
| 4 | -7 | -6  | 2129.38 | 23.56 |
| 4 | -7 | -6  | 2160.89 | 24.11 |
| 4 | -7 | -6  | 2195.23 | 24.36 |
| 4 | -7 | -6  | 1920.33 | 22.88 |
| 4 | -7 | -5  | 98.23   | 4.15  |
| 4 | -7 | -5  | 91.67   | 4.05  |
| 4 | -7 | -5  | 91.95   | 4.05  |
| 4 | -7 | -5  | 99.15   | 4.14  |
| 4 | -7 | -5  | 95.08   | 3.79  |
| 4 | -7 | -5  | 102.76  | 3.69  |
| 4 | -7 | -5  | 94.84   | 3.79  |



CIF 31

|   |    |    |         |       |
|---|----|----|---------|-------|
| 4 | -7 | -4 | 2043.40 | 22.15 |
| 4 | -7 | -4 | 2049.09 | 22.19 |
| 4 | -7 | -4 | 2152.83 | 24.20 |
| 4 | -7 | -4 | 2089.61 | 23.30 |
| 4 | -7 | -4 | 1960.60 | 21.79 |
| 4 | -7 | -4 | 2085.77 | 22.87 |
| 4 | -7 | -4 | 2097.79 | 23.19 |
| 4 | -7 | -4 | 1974.11 | 22.33 |
| 4 | -7 | -3 | 937.63  | 13.27 |
| 4 | -7 | -3 | 883.10  | 12.08 |
| 4 | -7 | -3 | 906.21  | 12.10 |
| 4 | -7 | -3 | 845.85  | 12.60 |
| 4 | -7 | -3 | 919.91  | 13.26 |
| 4 | -7 | -3 | 933.00  | 12.90 |
| 4 | -7 | -3 | 869.99  | 11.78 |
| 4 | -7 | -3 | 874.88  | 11.91 |
| 4 | -7 | -3 | 883.61  | 12.89 |
| 4 | -7 | -3 | 839.03  | 11.88 |
| 4 | -7 | -3 | 919.28  | 12.70 |
| 4 | -7 | -3 | 917.19  | 12.13 |
| 4 | -7 | -2 | 325.82  | 6.06  |
| 4 | -7 | -2 | 356.42  | 7.33  |
| 4 | -7 | -2 | 350.85  | 6.81  |
| 4 | -7 | -2 | 353.95  | 7.19  |
| 4 | -7 | -2 | 357.55  | 7.10  |
| 4 | -7 | -2 | 351.83  | 7.30  |
| 4 | -7 | -2 | 358.36  | 7.19  |
| 4 | -7 | -2 | 349.67  | 6.58  |
| 4 | -7 | -2 | 345.08  | 6.84  |
| 4 | -7 | -2 | 374.11  | 7.39  |
| 4 | -7 | -2 | 341.86  | 6.80  |
| 4 | -7 | -2 | 367.29  | 6.63  |
| 4 | -7 | -2 | 358.08  | 7.08  |
| 4 | -7 | -2 | 375.59  | 6.67  |
| 4 | -7 | -1 | 109.84  | 3.31  |
| 4 | -7 | -1 | 95.85   | 3.24  |
| 4 | -7 | -1 | 107.58  | 3.72  |
| 4 | -7 | -1 | 116.81  | 3.74  |
| 4 | -7 | -1 | 109.71  | 3.73  |
| 4 | -7 | -1 | 115.39  | 3.78  |
| 4 | -7 | -1 | 110.08  | 3.67  |

## CIF 31

|   |    |    |        |      |
|---|----|----|--------|------|
| 4 | -7 | -1 | 87.99  | 3.45 |
| 4 | -7 | -1 | 102.66 | 3.61 |
| 4 | -7 | -1 | 103.02 | 3.41 |
| 4 | -7 | -1 | 119.52 | 3.92 |
| 4 | -7 | -1 | 104.50 | 3.65 |
| 4 | -7 | -1 | 108.43 | 3.46 |
| 4 | -7 | -1 | 106.28 | 3.28 |
| 4 | -7 | -1 | 119.26 | 3.41 |
| 4 | -7 | -1 | 113.15 | 3.31 |
| 4 | -7 | 0  | 194.69 | 4.69 |
| 4 | -7 | 0  | 208.12 | 5.05 |
| 4 | -7 | 0  | 195.26 | 4.80 |
| 4 | -7 | 0  | 205.11 | 5.09 |
| 4 | -7 | 0  | 223.12 | 5.29 |
| 4 | -7 | 0  | 212.93 | 5.30 |
| 4 | -7 | 0  | 193.43 | 4.88 |
| 4 | -7 | 0  | 212.65 | 5.13 |
| 4 | -7 | 0  | 186.94 | 5.11 |
| 4 | -7 | 0  | 200.95 | 4.71 |
| 4 | -7 | 0  | 199.84 | 4.33 |
| 4 | -7 | 0  | 174.04 | 4.10 |
| 4 | -7 | 0  | 196.70 | 4.73 |
| 4 | -7 | 1  | 3.05   | 0.90 |
| 4 | -7 | 1  | 2.35   | 0.90 |
| 4 | -7 | 1  | 2.30   | 0.81 |
| 4 | -7 | 1  | 2.09   | 1.00 |
| 4 | -7 | 1  | 2.22   | 0.89 |
| 4 | -7 | 1  | 1.15   | 0.72 |
| 4 | -7 | 1  | 2.76   | 1.08 |
| 4 | -7 | 1  | 1.13   | 0.58 |
| 4 | -7 | 2  | 21.78  | 1.75 |
| 4 | -7 | 2  | 20.89  | 1.66 |
| 4 | -7 | 2  | 19.98  | 1.56 |
| 4 | -7 | 2  | 19.90  | 1.30 |
| 4 | -7 | 2  | 25.36  | 1.79 |
| 4 | -7 | 2  | 17.69  | 1.72 |
| 4 | -7 | 2  | 22.92  | 1.56 |
| 4 | -7 | 2  | 17.98  | 1.15 |
| 4 | -7 | 3  | 90.01  | 3.44 |
| 4 | -7 | 3  | 79.63  | 3.05 |
| 4 | -7 | 3  | 85.71  | 2.94 |

## CIF 31

|   |    |     |        |       |
|---|----|-----|--------|-------|
| 4 | -7 | 3   | 84.71  | 3.22  |
| 4 | -7 | 3   | 91.76  | 3.07  |
| 4 | -7 | 4   | 169.11 | 4.89  |
| 4 | -7 | 4   | 159.02 | 4.31  |
| 4 | -7 | 4   | 153.41 | 4.47  |
| 4 | -7 | 4   | 158.81 | 4.89  |
| 4 | -7 | 4   | 152.38 | 4.11  |
| 4 | -7 | 5   | 585.11 | 9.59  |
| 4 | -7 | 5   | 561.23 | 10.14 |
| 4 | -7 | 5   | 553.01 | 8.83  |
| 4 | -7 | 6   | 53.07  | 2.97  |
| 4 | -7 | 6   | 48.13  | 2.72  |
| 4 | -7 | 6   | 47.99  | 2.83  |
| 4 | -7 | 7   | 458.42 | 9.07  |
| 4 | -7 | 7   | 439.91 | 8.94  |
| 4 | -7 | 7   | 428.55 | 8.76  |
| 4 | -7 | 7   | 397.96 | 7.66  |
| 4 | -7 | 7   | 479.55 | 9.44  |
| 4 | -7 | 8   | 24.50  | 2.11  |
| 4 | -7 | 8   | 24.58  | 1.97  |
| 4 | -7 | 8   | 23.16  | 1.79  |
| 4 | -7 | 9   | 28.96  | 2.22  |
| 4 | -7 | 9   | 36.88  | 2.72  |
| 4 | -7 | 10  | 125.13 | 5.10  |
| 4 | -7 | 11  | 41.02  | 2.69  |
| 4 | -7 | 12  | 9.57   | 1.10  |
| 4 | -6 | -12 | 15.24  | 1.40  |
| 4 | -6 | -12 | 13.13  | 0.98  |
| 4 | -6 | -11 | 1.29   | 0.68  |
| 4 | -6 | -11 | -0.09  | 0.61  |
| 4 | -6 | -11 | 0.39   | 0.63  |
| 4 | -6 | -11 | 0.51   | 0.81  |
| 4 | -6 | -10 | 177.86 | 4.55  |
| 4 | -6 | -10 | 191.40 | 4.90  |
| 4 | -6 | -10 | 185.82 | 5.15  |
| 4 | -6 | -10 | 196.06 | 4.88  |
| 4 | -6 | -9  | 218.36 | 5.72  |
| 4 | -6 | -9  | 218.35 | 5.46  |
| 4 | -6 | -9  | 193.04 | 6.17  |
| 4 | -6 | -9  | 207.04 | 6.08  |
| 4 | -6 | -9  | 197.93 | 5.12  |

## CIF 31

|   |    |    |         |       |
|---|----|----|---------|-------|
| 4 | -6 | -9 | 220.36  | 5.60  |
| 4 | -6 | -8 | 9.73    | 1.42  |
| 4 | -6 | -8 | 8.42    | 1.59  |
| 4 | -6 | -8 | 8.59    | 1.61  |
| 4 | -6 | -8 | 8.67    | 1.63  |
| 4 | -6 | -8 | 9.92    | 1.56  |
| 4 | -6 | -8 | 11.08   | 1.55  |
| 4 | -6 | -7 | 24.81   | 2.04  |
| 4 | -6 | -7 | 24.99   | 2.31  |
| 4 | -6 | -7 | 27.60   | 2.37  |
| 4 | -6 | -7 | 26.98   | 2.37  |
| 4 | -6 | -7 | 27.84   | 2.43  |
| 4 | -6 | -7 | 28.76   | 2.25  |
| 4 | -6 | -7 | 24.16   | 1.87  |
| 4 | -6 | -7 | 28.68   | 2.22  |
| 4 | -6 | -7 | 25.45   | 2.15  |
| 4 | -6 | -6 | 1003.93 | 13.90 |
| 4 | -6 | -6 | 917.66  | 14.30 |
| 4 | -6 | -6 | 901.68  | 14.06 |
| 4 | -6 | -6 | 951.67  | 14.30 |
| 4 | -6 | -6 | 978.92  | 14.47 |
| 4 | -6 | -6 | 966.49  | 14.04 |
| 4 | -6 | -6 | 942.03  | 12.93 |
| 4 | -6 | -6 | 946.35  | 12.92 |
| 4 | -6 | -6 | 981.76  | 13.82 |
| 4 | -6 | -5 | 11.84   | 1.36  |
| 4 | -6 | -5 | 13.49   | 1.38  |
| 4 | -6 | -5 | 15.56   | 1.66  |
| 4 | -6 | -5 | 11.61   | 1.54  |
| 4 | -6 | -5 | 15.52   | 1.64  |
| 4 | -6 | -5 | 11.28   | 1.54  |
| 4 | -6 | -5 | 14.94   | 1.60  |
| 4 | -6 | -5 | 12.40   | 1.25  |
| 4 | -6 | -5 | 14.80   | 1.47  |
| 4 | -6 | -5 | 12.88   | 1.45  |
| 4 | -6 | -5 | 13.95   | 1.51  |
| 4 | -6 | -4 | 142.03  | 3.76  |
| 4 | -6 | -4 | 154.08  | 4.28  |
| 4 | -6 | -4 | 151.52  | 4.22  |
| 4 | -6 | -4 | 155.81  | 4.71  |
| 4 | -6 | -4 | 154.89  | 4.49  |

## CIF 31

|   |    |    |        |       |
|---|----|----|--------|-------|
| 4 | -6 | -4 | 144.51 | 4.35  |
| 4 | -6 | -4 | 146.93 | 4.08  |
| 4 | -6 | -4 | 142.73 | 4.10  |
| 4 | -6 | -4 | 150.94 | 4.40  |
| 4 | -6 | -3 | 16.05  | 1.41  |
| 4 | -6 | -3 | 20.98  | 1.75  |
| 4 | -6 | -3 | 19.07  | 1.65  |
| 4 | -6 | -3 | 18.06  | 1.47  |
| 4 | -6 | -3 | 18.32  | 1.54  |
| 4 | -6 | -3 | 15.73  | 1.46  |
| 4 | -6 | -3 | 14.69  | 1.33  |
| 4 | -6 | -3 | 19.05  | 1.41  |
| 4 | -6 | -3 | 18.12  | 1.54  |
| 4 | -6 | -3 | 19.29  | 1.46  |
| 4 | -6 | -3 | 16.89  | 1.48  |
| 4 | -6 | -3 | 20.61  | 1.49  |
| 4 | -6 | -2 | 843.46 | 10.55 |
| 4 | -6 | -2 | 763.65 | 9.62  |
| 4 | -6 | -2 | 792.65 | 11.00 |
| 4 | -6 | -2 | 735.40 | 10.66 |
| 4 | -6 | -2 | 834.19 | 11.12 |
| 4 | -6 | -2 | 822.65 | 11.27 |
| 4 | -6 | -2 | 807.47 | 10.76 |
| 4 | -6 | -2 | 755.59 | 10.66 |
| 4 | -6 | -2 | 722.81 | 10.36 |
| 4 | -6 | -2 | 728.84 | 10.16 |
| 4 | -6 | -2 | 848.20 | 11.17 |
| 4 | -6 | -2 | 777.78 | 10.12 |
| 4 | -6 | -1 | 860.67 | 10.95 |
| 4 | -6 | -1 | 861.29 | 10.38 |
| 4 | -6 | -1 | 816.56 | 11.04 |
| 4 | -6 | -1 | 811.19 | 10.77 |
| 4 | -6 | -1 | 818.57 | 11.05 |
| 4 | -6 | -1 | 868.40 | 11.52 |
| 4 | -6 | -1 | 818.35 | 11.00 |
| 4 | -6 | -1 | 750.67 | 10.58 |
| 4 | -6 | -1 | 827.28 | 11.07 |
| 4 | -6 | -1 | 751.52 | 10.11 |
| 4 | -6 | -1 | 878.60 | 10.40 |
| 4 | -6 | 0  | 236.27 | 4.81  |
| 4 | -6 | 0  | 241.49 | 4.84  |

## CIF 31

|   |    |   |        |       |
|---|----|---|--------|-------|
| 4 | -6 | 0 | 228.04 | 4.91  |
| 4 | -6 | 0 | 226.73 | 4.74  |
| 4 | -6 | 0 | 234.72 | 5.20  |
| 4 | -6 | 0 | 244.79 | 5.32  |
| 4 | -6 | 0 | 228.97 | 5.24  |
| 4 | -6 | 0 | 234.09 | 5.24  |
| 4 | -6 | 0 | 245.65 | 4.68  |
| 4 | -6 | 0 | 248.18 | 4.47  |
| 4 | -6 | 1 | 456.47 | 7.18  |
| 4 | -6 | 1 | 407.13 | 6.30  |
| 4 | -6 | 1 | 396.22 | 6.80  |
| 4 | -6 | 1 | 406.76 | 6.63  |
| 4 | -6 | 1 | 394.74 | 7.00  |
| 4 | -6 | 1 | 428.13 | 7.33  |
| 4 | -6 | 1 | 374.94 | 6.60  |
| 4 | -6 | 1 | 443.70 | 7.46  |
| 4 | -6 | 1 | 405.02 | 6.32  |
| 4 | -6 | 1 | 425.43 | 5.97  |
| 4 | -6 | 2 | 1.87   | 0.81  |
| 4 | -6 | 2 | 0.09   | 0.42  |
| 4 | -6 | 2 | 1.04   | 0.61  |
| 4 | -6 | 2 | 0.58   | 0.69  |
| 4 | -6 | 2 | 0.12   | 0.39  |
| 4 | -6 | 2 | 0.11   | 0.56  |
| 4 | -6 | 2 | 0.34   | 0.50  |
| 4 | -6 | 2 | 0.80   | 0.40  |
| 4 | -6 | 3 | 172.48 | 4.10  |
| 4 | -6 | 3 | 176.07 | 3.94  |
| 4 | -6 | 4 | 834.48 | 11.30 |
| 4 | -6 | 4 | 860.33 | 12.04 |
| 4 | -6 | 5 | 208.29 | 5.34  |
| 4 | -6 | 5 | 196.19 | 5.02  |
| 4 | -6 | 5 | 201.99 | 4.61  |
| 4 | -6 | 5 | 212.17 | 5.44  |
| 4 | -6 | 6 | 52.26  | 2.77  |
| 4 | -6 | 6 | 53.38  | 2.77  |
| 4 | -6 | 6 | 51.99  | 2.40  |
| 4 | -6 | 6 | 53.15  | 2.73  |
| 4 | -6 | 7 | 61.70  | 3.03  |
| 4 | -6 | 7 | 55.37  | 2.94  |
| 4 | -6 | 7 | 54.70  | 2.81  |

## CIF 31

|   |    |     |         |       |
|---|----|-----|---------|-------|
| 4 | -6 | 7   | 58.36   | 2.65  |
| 4 | -6 | 8   | 3.01    | 0.99  |
| 4 | -6 | 8   | 3.85    | 0.96  |
| 4 | -6 | 8   | 3.11    | 0.90  |
| 4 | -6 | 9   | 949.14  | 14.15 |
| 4 | -6 | 9   | 1177.05 | 15.95 |
| 4 | -6 | 10  | 944.91  | 14.40 |
| 4 | -6 | 11  | 243.47  | 6.10  |
| 4 | -6 | 11  | 217.41  | 5.47  |
| 4 | -5 | -13 | 17.29   | 1.21  |
| 4 | -5 | -13 | 15.68   | 1.01  |
| 4 | -5 | -13 | 17.34   | 1.23  |
| 4 | -5 | -12 | 12.76   | 1.24  |
| 4 | -5 | -12 | 14.24   | 1.34  |
| 4 | -5 | -12 | 14.67   | 1.44  |
| 4 | -5 | -12 | 13.14   | 1.14  |
| 4 | -5 | -11 | 320.59  | 6.64  |
| 4 | -5 | -11 | 289.16  | 5.48  |
| 4 | -5 | -11 | 279.60  | 6.25  |
| 4 | -5 | -11 | 282.68  | 6.86  |
| 4 | -5 | -11 | 316.72  | 6.77  |
| 4 | -5 | -11 | 306.14  | 6.08  |
| 4 | -5 | -10 | 17.88   | 1.72  |
| 4 | -5 | -10 | 15.05   | 1.78  |
| 4 | -5 | -10 | 14.37   | 1.74  |
| 4 | -5 | -9  | 222.34  | 5.82  |
| 4 | -5 | -9  | 220.11  | 6.32  |
| 4 | -5 | -9  | 216.53  | 6.47  |
| 4 | -5 | -9  | 213.86  | 5.86  |
| 4 | -5 | -9  | 207.28  | 5.15  |
| 4 | -5 | -9  | 229.95  | 6.18  |
| 4 | -5 | -9  | 214.95  | 5.53  |
| 4 | -5 | -8  | 43.52   | 2.73  |
| 4 | -5 | -8  | 32.29   | 2.48  |
| 4 | -5 | -8  | 32.90   | 2.30  |
| 4 | -5 | -8  | 33.90   | 2.13  |
| 4 | -5 | -8  | 41.92   | 2.74  |
| 4 | -5 | -8  | 36.14   | 2.47  |
| 4 | -5 | -7  | 185.45  | 4.79  |
| 4 | -5 | -7  | 202.88  | 5.68  |
| 4 | -5 | -7  | 178.55  | 5.60  |

## CIF 31

|   |    |    |         |       |
|---|----|----|---------|-------|
| 4 | -5 | -7 | 183.08  | 5.59  |
| 4 | -5 | -7 | 209.54  | 5.88  |
| 4 | -5 | -7 | 193.37  | 5.25  |
| 4 | -5 | -7 | 193.51  | 4.87  |
| 4 | -5 | -7 | 200.02  | 5.64  |
| 4 | -5 | -7 | 191.12  | 5.22  |
| 4 | -5 | -6 | 105.86  | 3.40  |
| 4 | -5 | -6 | 96.45   | 3.53  |
| 4 | -5 | -6 | 93.81   | 3.78  |
| 4 | -5 | -6 | 100.78  | 3.85  |
| 4 | -5 | -6 | 95.76   | 3.76  |
| 4 | -5 | -6 | 101.10  | 3.58  |
| 4 | -5 | -6 | 101.67  | 3.33  |
| 4 | -5 | -6 | 96.73   | 3.74  |
| 4 | -5 | -6 | 109.54  | 4.03  |
| 4 | -5 | -6 | 95.73   | 3.43  |
| 4 | -5 | -5 | 424.23  | 7.15  |
| 4 | -5 | -5 | 438.55  | 8.06  |
| 4 | -5 | -5 | 437.25  | 7.72  |
| 4 | -5 | -5 | 418.37  | 7.50  |
| 4 | -5 | -5 | 436.08  | 8.03  |
| 4 | -5 | -5 | 431.05  | 8.07  |
| 4 | -5 | -5 | 454.75  | 8.12  |
| 4 | -5 | -5 | 429.04  | 7.80  |
| 4 | -5 | -5 | 453.40  | 7.65  |
| 4 | -5 | -5 | 423.14  | 7.79  |
| 4 | -5 | -4 | 1344.71 | 14.83 |
| 4 | -5 | -4 | 1251.70 | 15.40 |
| 4 | -5 | -4 | 1304.56 | 15.40 |
| 4 | -5 | -4 | 1252.21 | 15.06 |
| 4 | -5 | -4 | 1226.93 | 14.27 |
| 4 | -5 | -4 | 1379.25 | 15.76 |
| 4 | -5 | -4 | 1331.38 | 15.61 |
| 4 | -5 | -4 | 1335.69 | 15.26 |
| 4 | -5 | -4 | 1270.17 | 17.15 |
| 4 | -5 | -4 | 1201.35 | 13.50 |
| 4 | -5 | -4 | 1329.39 | 15.51 |
| 4 | -5 | -4 | 1219.51 | 14.52 |
| 4 | -5 | -3 | 4781.00 | 42.42 |
| 4 | -5 | -3 | 4422.50 | 40.23 |
| 4 | -5 | -3 | 4316.46 | 42.53 |



## CIF 31

|   |    |    |         |       |
|---|----|----|---------|-------|
| 4 | -5 | -3 | 4296.37 | 42.76 |
| 4 | -5 | -3 | 4517.20 | 42.78 |
| 4 | -5 | -3 | 4775.52 | 42.83 |
| 4 | -5 | -3 | 4858.65 | 43.31 |
| 4 | -5 | -3 | 4685.30 | 42.93 |
| 4 | -5 | -3 | 5105.65 | 43.09 |
| 4 | -5 | -3 | 4897.00 | 41.90 |
| 4 | -5 | -3 | 4762.06 | 45.85 |
| 4 | -5 | -3 | 4511.77 | 42.35 |
| 4 | -5 | -3 | 4713.77 | 41.72 |
| 4 | -5 | -3 | 4935.15 | 43.17 |
| 4 | -5 | -2 | 3.14    | 0.58  |
| 4 | -5 | -2 | 3.04    | 0.76  |
| 4 | -5 | -2 | 3.65    | 0.82  |
| 4 | -5 | -2 | 2.37    | 0.83  |
| 4 | -5 | -2 | 1.65    | 0.67  |
| 4 | -5 | -2 | 2.16    | 0.77  |
| 4 | -5 | -2 | 1.93    | 0.70  |
| 4 | -5 | -2 | 1.68    | 0.71  |
| 4 | -5 | -2 | 2.14    | 0.64  |
| 4 | -5 | -2 | 3.62    | 0.99  |
| 4 | -5 | -2 | 2.36    | 0.59  |
| 4 | -5 | -2 | 2.37    | 0.67  |
| 4 | -5 | -1 | 3168.43 | 28.67 |
| 4 | -5 | -1 | 3147.49 | 29.46 |
| 4 | -5 | -1 | 3066.48 | 29.46 |
| 4 | -5 | -1 | 3012.26 | 29.53 |
| 4 | -5 | -1 | 2975.52 | 29.76 |
| 4 | -5 | -1 | 3133.53 | 32.71 |
| 4 | -5 | -1 | 3094.05 | 29.20 |
| 4 | -5 | -1 | 3208.39 | 28.44 |
| 4 | -5 | -1 | 3138.59 | 29.68 |
| 4 | -5 | 0  | 442.84  | 6.65  |
| 4 | -5 | 0  | 430.67  | 6.90  |
| 4 | -5 | 0  | 474.23  | 7.19  |
| 4 | -5 | 0  | 483.25  | 7.21  |
| 4 | -5 | 0  | 467.79  | 6.17  |
| 4 | -5 | 1  | 3523.56 | 32.87 |
| 4 | -5 | 1  | 3541.25 | 35.96 |
| 4 | -5 | 1  | 3518.27 | 31.22 |
| 4 | -5 | 1  | 3636.81 | 32.86 |

## CIF 31

|   |    |     |        |      |
|---|----|-----|--------|------|
| 4 | -5 | 2   | 108.41 | 2.58 |
| 4 | -5 | 2   | 98.00  | 3.89 |
| 4 | -5 | 2   | 99.79  | 2.49 |
| 4 | -5 | 3   | 216.77 | 3.61 |
| 4 | -5 | 3   | 237.95 | 6.18 |
| 4 | -5 | 3   | 224.48 | 4.10 |
| 4 | -5 | 3   | 233.07 | 5.00 |
| 4 | -5 | 4   | 119.10 | 3.63 |
| 4 | -5 | 4   | 111.71 | 2.97 |
| 4 | -5 | 4   | 124.09 | 3.68 |
| 4 | -5 | 5   | 176.91 | 4.64 |
| 4 | -5 | 5   | 184.60 | 4.13 |
| 4 | -5 | 5   | 180.81 | 4.69 |
| 4 | -5 | 6   | 1.29   | 0.78 |
| 4 | -5 | 6   | 3.07   | 0.84 |
| 4 | -5 | 6   | 2.37   | 0.73 |
| 4 | -5 | 6   | 1.03   | 0.72 |
| 4 | -5 | 7   | 195.46 | 5.26 |
| 4 | -5 | 7   | 182.41 | 4.62 |
| 4 | -5 | 7   | 179.77 | 4.88 |
| 4 | -5 | 8   | 10.16  | 1.32 |
| 4 | -5 | 8   | 11.07  | 1.47 |
| 4 | -5 | 9   | 2.85   | 1.10 |
| 4 | -5 | 10  | 167.22 | 5.27 |
| 4 | -5 | 11  | 15.33  | 1.64 |
| 4 | -5 | 11  | 13.30  | 1.44 |
| 4 | -4 | -14 | 1.09   | 0.49 |
| 4 | -4 | -14 | 1.98   | 0.59 |
| 4 | -4 | -13 | 70.85  | 2.62 |
| 4 | -4 | -13 | 67.81  | 2.54 |
| 4 | -4 | -13 | 76.74  | 2.63 |
| 4 | -4 | -13 | 60.78  | 2.69 |
| 4 | -4 | -13 | 84.83  | 2.92 |
| 4 | -4 | -12 | 5.14   | 1.03 |
| 4 | -4 | -12 | 7.84   | 1.27 |
| 4 | -4 | -12 | 5.06   | 1.20 |
| 4 | -4 | -12 | 6.55   | 1.25 |
| 4 | -4 | -12 | 6.63   | 1.01 |
| 4 | -4 | -11 | 125.91 | 4.31 |
| 4 | -4 | -11 | 124.34 | 4.08 |
| 4 | -4 | -11 | 123.46 | 4.91 |

## CIF 31

|   |    |     |         |       |
|---|----|-----|---------|-------|
| 4 | -4 | -11 | 118.51  | 4.27  |
| 4 | -4 | -10 | 253.02  | 6.34  |
| 4 | -4 | -10 | 238.86  | 6.99  |
| 4 | -4 | -10 | 242.01  | 6.62  |
| 4 | -4 | -10 | 251.22  | 6.44  |
| 4 | -4 | -9  | 905.20  | 13.30 |
| 4 | -4 | -9  | 942.98  | 13.39 |
| 4 | -4 | -9  | 956.10  | 15.10 |
| 4 | -4 | -9  | 976.48  | 15.11 |
| 4 | -4 | -9  | 917.80  | 14.13 |
| 4 | -4 | -9  | 913.68  | 12.17 |
| 4 | -4 | -9  | 906.68  | 13.49 |
| 4 | -4 | -9  | 933.76  | 13.23 |
| 4 | -4 | -8  | 347.17  | 7.22  |
| 4 | -4 | -8  | 362.68  | 8.05  |
| 4 | -4 | -8  | 337.77  | 7.83  |
| 4 | -4 | -8  | 355.78  | 8.14  |
| 4 | -4 | -8  | 336.38  | 7.49  |
| 4 | -4 | -8  | 344.57  | 6.53  |
| 4 | -4 | -8  | 346.89  | 7.76  |
| 4 | -4 | -8  | 350.18  | 7.28  |
| 4 | -4 | -7  | 868.22  | 12.29 |
| 4 | -4 | -7  | 1004.51 | 13.93 |
| 4 | -4 | -7  | 926.09  | 13.54 |
| 4 | -4 | -7  | 864.52  | 13.20 |
| 4 | -4 | -7  | 874.15  | 13.10 |
| 4 | -4 | -7  | 955.85  | 13.72 |
| 4 | -4 | -7  | 920.47  | 13.47 |
| 4 | -4 | -7  | 930.73  | 13.15 |
| 4 | -4 | -7  | 912.04  | 13.08 |
| 4 | -4 | -7  | 847.14  | 13.09 |
| 4 | -4 | -7  | 822.87  | 12.07 |
| 4 | -4 | -6  | 586.28  | 9.05  |
| 4 | -4 | -6  | 592.49  | 9.09  |
| 4 | -4 | -6  | 565.07  | 9.17  |
| 4 | -4 | -6  | 587.20  | 9.54  |
| 4 | -4 | -6  | 609.78  | 9.74  |
| 4 | -4 | -6  | 559.43  | 9.41  |
| 4 | -4 | -6  | 593.88  | 9.56  |
| 4 | -4 | -6  | 602.26  | 9.70  |
| 4 | -4 | -6  | 521.91  | 9.24  |

## CIF 31

|   |    |    |         |       |
|---|----|----|---------|-------|
| 4 | -4 | -6 | 572.49  | 9.27  |
| 4 | -4 | -6 | 599.33  | 9.62  |
| 4 | -4 | -6 | 526.55  | 8.63  |
| 4 | -4 | -5 | 1585.84 | 17.53 |
| 4 | -4 | -5 | 1714.33 | 18.02 |
| 4 | -4 | -5 | 1653.04 | 18.40 |
| 4 | -4 | -5 | 1549.53 | 17.94 |
| 4 | -4 | -5 | 1588.38 | 17.86 |
| 4 | -4 | -5 | 1636.97 | 18.14 |
| 4 | -4 | -5 | 1689.74 | 18.51 |
| 4 | -4 | -5 | 1502.57 | 17.79 |
| 4 | -4 | -5 | 1650.00 | 18.23 |
| 4 | -4 | -5 | 1604.08 | 17.37 |
| 4 | -4 | -5 | 1614.47 | 18.17 |
| 4 | -4 | -5 | 1640.52 | 18.11 |
| 4 | -4 | -5 | 1717.37 | 17.10 |
| 4 | -4 | -5 | 1521.12 | 18.82 |
| 4 | -4 | -5 | 1633.74 | 18.11 |
| 4 | -4 | -5 | 1350.68 | 16.75 |
| 4 | -4 | -4 | 109.67  | 3.16  |
| 4 | -4 | -4 | 106.88  | 3.18  |
| 4 | -4 | -4 | 104.07  | 3.24  |
| 4 | -4 | -4 | 110.98  | 3.27  |
| 4 | -4 | -4 | 102.95  | 3.12  |
| 4 | -4 | -4 | 107.71  | 3.22  |
| 4 | -4 | -4 | 107.10  | 3.09  |
| 4 | -4 | -4 | 106.93  | 3.24  |
| 4 | -4 | -4 | 119.00  | 3.43  |
| 4 | -4 | -4 | 106.13  | 3.21  |
| 4 | -4 | -4 | 102.86  | 2.99  |
| 4 | -4 | -4 | 115.89  | 3.91  |
| 4 | -4 | -4 | 104.05  | 2.49  |
| 4 | -4 | -4 | 114.02  | 3.34  |
| 4 | -4 | -3 | 6.92    | 1.02  |
| 4 | -4 | -3 | 6.49    | 0.87  |
| 4 | -4 | -3 | 7.32    | 0.94  |
| 4 | -4 | -3 | 8.18    | 0.97  |
| 4 | -4 | -3 | 9.14    | 1.19  |
| 4 | -4 | -3 | 6.71    | 0.74  |
| 4 | -4 | -3 | 6.73    | 0.92  |
| 4 | -4 | -2 | 716.22  | 9.05  |

## CIF 31

|   |    |     |         |       |
|---|----|-----|---------|-------|
| 4 | -4 | -2  | 659.80  | 8.74  |
| 4 | -4 | -2  | 693.48  | 8.74  |
| 4 | -4 | -2  | 695.92  | 8.69  |
| 4 | -4 | -2  | 671.96  | 8.87  |
| 4 | -4 | -2  | 666.62  | 10.19 |
| 4 | -4 | -1  | 2969.24 | 28.51 |
| 4 | -4 | -1  | 3141.95 | 28.93 |
| 4 | -4 | -1  | 3262.32 | 28.87 |
| 4 | -4 | -1  | 3137.55 | 28.86 |
| 4 | -4 | -1  | 3310.52 | 31.59 |
| 4 | -4 | -1  | 3043.59 | 28.34 |
| 4 | -4 | -1  | 2973.10 | 29.06 |
| 4 | -4 | 0   | 13.14   | 1.05  |
| 4 | -4 | 0   | 12.18   | 1.00  |
| 4 | -4 | 0   | 13.98   | 1.11  |
| 4 | -4 | 1   | 59.97   | 1.95  |
| 4 | -4 | 1   | 67.56   | 2.25  |
| 4 | -4 | 1   | 66.60   | 2.87  |
| 4 | -4 | 1   | 60.37   | 2.14  |
| 4 | -4 | 2   | 360.02  | 5.20  |
| 4 | -4 | 2   | 362.70  | 7.24  |
| 4 | -4 | 3   | 693.27  | 10.64 |
| 4 | -4 | 3   | 718.23  | 9.30  |
| 4 | -4 | 4   | 118.41  | 3.93  |
| 4 | -4 | 4   | 115.64  | 3.37  |
| 4 | -4 | 5   | 7.95    | 1.00  |
| 4 | -4 | 6   | 96.23   | 3.36  |
| 4 | -4 | 6   | 92.08   | 3.21  |
| 4 | -4 | 7   | 4.15    | 0.90  |
| 4 | -4 | 7   | 3.36    | 0.92  |
| 4 | -4 | 7   | 3.70    | 0.83  |
| 4 | -4 | 8   | 1431.33 | 17.31 |
| 4 | -4 | 8   | 1422.81 | 18.63 |
| 4 | -4 | 9   | 86.58   | 3.66  |
| 4 | -4 | 10  | 914.95  | 13.33 |
| 4 | -4 | 11  | 17.30   | 1.60  |
| 4 | -3 | -14 | 72.62   | 2.37  |
| 4 | -3 | -14 | 84.69   | 2.36  |
| 4 | -3 | -14 | 61.26   | 1.69  |
| 4 | -3 | -14 | 95.79   | 2.87  |
| 4 | -3 | -13 | 27.15   | 1.75  |

## CIF 31

|   |    |     |        |      |
|---|----|-----|--------|------|
| 4 | -3 | -13 | 26.98  | 1.84 |
| 4 | -3 | -13 | 30.48  | 1.80 |
| 4 | -3 | -13 | 28.66  | 2.33 |
| 4 | -3 | -13 | 29.18  | 1.57 |
| 4 | -3 | -13 | 34.19  | 2.14 |
| 4 | -3 | -13 | 27.29  | 1.52 |
| 4 | -3 | -12 | 3.08   | 1.02 |
| 4 | -3 | -12 | 2.51   | 0.93 |
| 4 | -3 | -12 | 3.96   | 1.36 |
| 4 | -3 | -12 | 3.96   | 1.09 |
| 4 | -3 | -11 | 1.41   | 0.90 |
| 4 | -3 | -11 | 1.34   | 1.19 |
| 4 | -3 | -11 | 2.16   | 1.15 |
| 4 | -3 | -10 | 39.00  | 2.66 |
| 4 | -3 | -10 | 37.69  | 2.43 |
| 4 | -3 | -10 | 40.93  | 2.93 |
| 4 | -3 | -10 | 33.44  | 2.75 |
| 4 | -3 | -10 | 35.09  | 2.60 |
| 4 | -3 | -10 | 31.66  | 2.38 |
| 4 | -3 | -10 | 34.59  | 2.20 |
| 4 | -3 | -9  | 177.19 | 5.39 |
| 4 | -3 | -9  | 203.01 | 5.74 |
| 4 | -3 | -9  | 194.80 | 5.20 |
| 4 | -3 | -9  | 190.83 | 6.01 |
| 4 | -3 | -9  | 182.64 | 5.92 |
| 4 | -3 | -9  | 180.10 | 5.72 |
| 4 | -3 | -9  | 173.00 | 4.34 |
| 4 | -3 | -9  | 174.97 | 5.09 |
| 4 | -3 | -9  | 183.93 | 5.13 |
| 4 | -3 | -8  | 126.60 | 4.32 |
| 4 | -3 | -8  | 154.89 | 4.80 |
| 4 | -3 | -8  | 136.34 | 4.06 |
| 4 | -3 | -8  | 137.29 | 4.36 |
| 4 | -3 | -8  | 153.59 | 5.04 |
| 4 | -3 | -8  | 131.03 | 4.61 |
| 4 | -3 | -8  | 128.78 | 4.54 |
| 4 | -3 | -8  | 134.46 | 4.74 |
| 4 | -3 | -8  | 146.94 | 4.85 |
| 4 | -3 | -8  | 140.22 | 4.69 |
| 4 | -3 | -8  | 130.14 | 4.17 |
| 4 | -3 | -8  | 138.66 | 4.35 |

## CIF 31

|   |    |    |         |       |
|---|----|----|---------|-------|
| 4 | -3 | -7 | 518.43  | 8.97  |
| 4 | -3 | -7 | 577.72  | 9.27  |
| 4 | -3 | -7 | 535.53  | 8.38  |
| 4 | -3 | -7 | 536.78  | 8.53  |
| 4 | -3 | -7 | 565.51  | 9.85  |
| 4 | -3 | -7 | 551.77  | 9.34  |
| 4 | -3 | -7 | 583.56  | 9.57  |
| 4 | -3 | -7 | 567.20  | 9.39  |
| 4 | -3 | -7 | 585.93  | 9.84  |
| 4 | -3 | -7 | 584.89  | 9.68  |
| 4 | -3 | -7 | 555.96  | 8.43  |
| 4 | -3 | -7 | 484.39  | 8.90  |
| 4 | -3 | -7 | 583.27  | 9.00  |
| 4 | -3 | -6 | 125.33  | 3.72  |
| 4 | -3 | -6 | 122.11  | 3.73  |
| 4 | -3 | -6 | 123.53  | 3.52  |
| 4 | -3 | -6 | 143.96  | 4.06  |
| 4 | -3 | -6 | 129.61  | 3.86  |
| 4 | -3 | -6 | 134.17  | 3.88  |
| 4 | -3 | -6 | 120.49  | 3.72  |
| 4 | -3 | -6 | 136.01  | 3.95  |
| 4 | -3 | -6 | 126.67  | 3.75  |
| 4 | -3 | -6 | 133.47  | 3.91  |
| 4 | -3 | -6 | 118.77  | 3.55  |
| 4 | -3 | -6 | 128.72  | 3.96  |
| 4 | -3 | -6 | 135.05  | 3.91  |
| 4 | -3 | -6 | 131.84  | 3.53  |
| 4 | -3 | -6 | 110.61  | 3.28  |
| 4 | -3 | -5 | 1041.67 | 12.62 |
| 4 | -3 | -5 | 1036.30 | 12.68 |
| 4 | -3 | -5 | 1058.35 | 12.85 |
| 4 | -3 | -5 | 944.76  | 12.34 |
| 4 | -3 | -5 | 1001.17 | 12.55 |
| 4 | -3 | -5 | 1001.60 | 12.36 |
| 4 | -3 | -5 | 1013.17 | 12.47 |
| 4 | -3 | -5 | 1005.65 | 12.07 |
| 4 | -3 | -5 | 1032.30 | 12.86 |
| 4 | -3 | -5 | 997.70  | 12.18 |
| 4 | -3 | -5 | 1053.03 | 13.32 |
| 4 | -3 | -4 | 100.33  | 3.01  |
| 4 | -3 | -4 | 102.18  | 3.06  |

## CIF 31

|   |    |    |         |       |
|---|----|----|---------|-------|
| 4 | -3 | -4 | 99.33   | 2.94  |
| 4 | -3 | -4 | 107.15  | 2.95  |
| 4 | -3 | -4 | 101.80  | 3.01  |
| 4 | -3 | -4 | 95.62   | 2.93  |
| 4 | -3 | -4 | 104.03  | 3.35  |
| 4 | -3 | -4 | 101.50  | 2.20  |
| 4 | -3 | -3 | 1289.83 | 13.61 |
| 4 | -3 | -3 | 1182.57 | 12.25 |
| 4 | -3 | -3 | 1133.98 | 12.82 |
| 4 | -3 | -3 | 1227.12 | 12.95 |
| 4 | -3 | -3 | 1196.34 | 13.21 |
| 4 | -3 | -3 | 1116.00 | 13.22 |
| 4 | -3 | -3 | 1194.07 | 14.35 |
| 4 | -3 | -3 | 1192.35 | 12.02 |
| 4 | -3 | -2 | 4618.12 | 43.22 |
| 4 | -3 | -2 | 4830.30 | 41.70 |
| 4 | -3 | -2 | 4841.97 | 43.23 |
| 4 | -3 | -2 | 4784.64 | 42.53 |
| 4 | -3 | -2 | 4815.80 | 42.80 |
| 4 | -3 | -2 | 5186.74 | 42.86 |
| 4 | -3 | -2 | 4939.00 | 43.26 |
| 4 | -3 | -2 | 5081.60 | 43.61 |
| 4 | -3 | -2 | 5117.89 | 45.02 |
| 4 | -3 | -2 | 4932.58 | 42.30 |
| 4 | -3 | -1 | 722.15  | 7.24  |
| 4 | -3 | -1 | 680.65  | 8.48  |
| 4 | -3 | -1 | 695.54  | 8.40  |
| 4 | -3 | -1 | 723.14  | 8.25  |
| 4 | -3 | -1 | 659.60  | 8.61  |
| 4 | -3 | -1 | 707.34  | 9.88  |
| 4 | -3 | -1 | 707.44  | 8.92  |
| 4 | -3 | 0  | 642.22  | 7.47  |
| 4 | -3 | 0  | 671.27  | 9.24  |
| 4 | -3 | 1  | 208.17  | 3.74  |
| 4 | -3 | 1  | 230.83  | 5.00  |
| 4 | -3 | 2  | 12.41   | 0.94  |
| 4 | -3 | 2  | 13.07   | 1.24  |
| 4 | -3 | 3  | 349.84  | 5.07  |
| 4 | -3 | 3  | 370.43  | 6.78  |
| 4 | -3 | 4  | 429.03  | 5.82  |
| 4 | -3 | 4  | 453.85  | 7.70  |



## CIF 31

|   |    |     |        |       |
|---|----|-----|--------|-------|
| 4 | -3 | 4   | 446.40 | 6.68  |
| 4 | -3 | 5   | 12.95  | 1.07  |
| 4 | -3 | 5   | 14.30  | 1.22  |
| 4 | -3 | 6   | 11.24  | 1.24  |
| 4 | -3 | 6   | 12.08  | 1.15  |
| 4 | -3 | 7   | 29.84  | 1.86  |
| 4 | -3 | 7   | 30.19  | 2.06  |
| 4 | -3 | 7   | 31.06  | 1.85  |
| 4 | -3 | 8   | 54.84  | 2.94  |
| 4 | -3 | 9   | 148.05 | 4.51  |
| 4 | -3 | 10  | 55.80  | 2.70  |
| 4 | -2 | -15 | 23.12  | 0.92  |
| 4 | -2 | -15 | 36.05  | 1.54  |
| 4 | -2 | -14 | 245.18 | 5.22  |
| 4 | -2 | -14 | 271.37 | 4.71  |
| 4 | -2 | -14 | 242.58 | 6.36  |
| 4 | -2 | -14 | 266.23 | 4.82  |
| 4 | -2 | -13 | 4.19   | 1.00  |
| 4 | -2 | -13 | 5.70   | 1.63  |
| 4 | -2 | -13 | 7.41   | 1.33  |
| 4 | -2 | -12 | 488.36 | 10.04 |
| 4 | -2 | -12 | 455.97 | 8.98  |
| 4 | -2 | -12 | 485.91 | 11.03 |
| 4 | -2 | -11 | 3.92   | 1.28  |
| 4 | -2 | -11 | 4.54   | 1.08  |
| 4 | -2 | -11 | 4.18   | 1.47  |
| 4 | -2 | -11 | 3.40   | 1.30  |
| 4 | -2 | -11 | 3.50   | 1.22  |
| 4 | -2 | -10 | 1.79   | 0.99  |
| 4 | -2 | -10 | 0.64   | 0.78  |
| 4 | -2 | -10 | 1.98   | 1.26  |
| 4 | -2 | -10 | 0.17   | 1.19  |
| 4 | -2 | -10 | 0.34   | 1.09  |
| 4 | -2 | -10 | 1.09   | 1.07  |
| 4 | -2 | -10 | 1.29   | 0.97  |
| 4 | -2 | -10 | 0.94   | 0.74  |
| 4 | -2 | -9  | 2.12   | 1.00  |
| 4 | -2 | -9  | 2.94   | 1.06  |
| 4 | -2 | -9  | 1.83   | 0.83  |
| 4 | -2 | -9  | 3.22   | 0.93  |
| 4 | -2 | -9  | 1.31   | 0.86  |

## CIF 31

|   |    |    |        |      |
|---|----|----|--------|------|
| 4 | -2 | -9 | 1.23   | 0.99 |
| 4 | -2 | -9 | 2.02   | 1.09 |
| 4 | -2 | -9 | 1.94   | 1.06 |
| 4 | -2 | -9 | 1.10   | 0.75 |
| 4 | -2 | -9 | 1.78   | 0.94 |
| 4 | -2 | -9 | 1.62   | 0.85 |
| 4 | -2 | -8 | 4.04   | 1.08 |
| 4 | -2 | -8 | 5.01   | 1.12 |
| 4 | -2 | -8 | 3.54   | 0.91 |
| 4 | -2 | -8 | 4.45   | 0.88 |
| 4 | -2 | -8 | 3.46   | 0.92 |
| 4 | -2 | -8 | 5.53   | 1.17 |
| 4 | -2 | -8 | 3.56   | 0.99 |
| 4 | -2 | -8 | 4.50   | 1.12 |
| 4 | -2 | -8 | 3.77   | 0.90 |
| 4 | -2 | -8 | 4.05   | 0.94 |
| 4 | -2 | -8 | 3.78   | 0.94 |
| 4 | -2 | -7 | 410.22 | 7.58 |
| 4 | -2 | -7 | 375.40 | 6.44 |
| 4 | -2 | -7 | 385.83 | 7.11 |
| 4 | -2 | -7 | 412.43 | 7.90 |
| 4 | -2 | -7 | 392.93 | 7.35 |
| 4 | -2 | -7 | 414.28 | 7.81 |
| 4 | -2 | -7 | 368.34 | 7.23 |
| 4 | -2 | -7 | 406.73 | 7.69 |
| 4 | -2 | -7 | 392.49 | 7.02 |
| 4 | -2 | -7 | 413.78 | 7.18 |
| 4 | -2 | -7 | 379.84 | 7.29 |
| 4 | -2 | -7 | 382.64 | 6.73 |
| 4 | -2 | -7 | 381.10 | 7.24 |
| 4 | -2 | -6 | 455.64 | 7.58 |
| 4 | -2 | -6 | 452.98 | 7.28 |
| 4 | -2 | -6 | 461.32 | 6.51 |
| 4 | -2 | -6 | 467.63 | 7.44 |
| 4 | -2 | -6 | 442.77 | 7.39 |
| 4 | -2 | -6 | 417.65 | 7.34 |
| 4 | -2 | -6 | 482.43 | 7.98 |
| 4 | -2 | -6 | 451.51 | 7.42 |
| 4 | -2 | -6 | 457.20 | 7.54 |
| 4 | -2 | -6 | 437.71 | 7.38 |
| 4 | -2 | -6 | 461.42 | 7.71 |

## CIF 31

|   |    |    |         |       |
|---|----|----|---------|-------|
| 4 | -2 | -6 | 447.66  | 7.16  |
| 4 | -2 | -6 | 444.14  | 7.57  |
| 4 | -2 | -6 | 461.96  | 6.49  |
| 4 | -2 | -6 | 481.53  | 7.58  |
| 4 | -2 | -6 | 422.40  | 7.21  |
| 4 | -2 | -6 | 446.52  | 7.46  |
| 4 | -2 | -5 | 1133.66 | 12.85 |
| 4 | -2 | -5 | 1162.04 | 12.44 |
| 4 | -2 | -5 | 920.20  | 12.33 |
| 4 | -2 | -5 | 1078.28 | 12.47 |
| 4 | -2 | -5 | 1067.36 | 12.62 |
| 4 | -2 | -5 | 1049.14 | 12.20 |
| 4 | -2 | -5 | 814.03  | 11.80 |
| 4 | -2 | -5 | 1080.60 | 12.69 |
| 4 | -2 | -5 | 1058.78 | 12.65 |
| 4 | -2 | -5 | 1091.99 | 12.82 |
| 4 | -2 | -5 | 1075.72 | 11.82 |
| 4 | -2 | -5 | 1132.42 | 12.89 |
| 4 | -2 | -5 | 1171.36 | 13.25 |
| 4 | -2 | -5 | 990.92  | 9.83  |
| 4 | -2 | -4 | 1138.08 | 13.05 |
| 4 | -2 | -4 | 1105.40 | 12.30 |
| 4 | -2 | -4 | 1199.35 | 13.46 |
| 4 | -2 | -4 | 1144.29 | 12.84 |
| 4 | -2 | -4 | 1138.26 | 13.13 |
| 4 | -2 | -4 | 1070.32 | 12.26 |
| 4 | -2 | -4 | 1129.92 | 13.25 |
| 4 | -2 | -4 | 1061.43 | 13.22 |
| 4 | -2 | -3 | 772.14  | 9.60  |
| 4 | -2 | -3 | 753.87  | 8.82  |
| 4 | -2 | -3 | 768.61  | 9.43  |
| 4 | -2 | -3 | 749.77  | 9.18  |
| 4 | -2 | -3 | 768.49  | 7.72  |
| 4 | -2 | -2 | 1225.26 | 12.40 |
| 4 | -2 | -2 | 1336.20 | 12.64 |
| 4 | -2 | -2 | 1270.07 | 13.19 |
| 4 | -2 | -2 | 1290.67 | 11.92 |
| 4 | -2 | -2 | 1270.59 | 13.53 |
| 4 | -2 | -2 | 1217.76 | 11.53 |
| 4 | -2 | -1 | 206.35  | 3.85  |
| 4 | -2 | -1 | 209.21  | 3.74  |

## CIF 31

|   |    |     |         |       |
|---|----|-----|---------|-------|
| 4 | -2 | -1  | 212.57  | 2.65  |
| 4 | -2 | 0   | 5435.84 | 45.18 |
| 4 | -2 | 0   | 5866.85 | 46.92 |
| 4 | -2 | 0   | 5233.64 | 44.14 |
| 4 | -2 | 0   | 6100.02 | 48.67 |
| 4 | -2 | 1   | 656.48  | 7.77  |
| 4 | -2 | 1   | 661.97  | 8.84  |
| 4 | -2 | 1   | 652.27  | 8.18  |
| 4 | -2 | 2   | 35.41   | 1.00  |
| 4 | -2 | 2   | 22.60   | 1.23  |
| 4 | -2 | 2   | 20.86   | 0.77  |
| 4 | -2 | 2   | 19.79   | 1.39  |
| 4 | -2 | 2   | 37.01   | 1.65  |
| 4 | -2 | 3   | 2.93    | 0.36  |
| 4 | -2 | 3   | 1.53    | 0.53  |
| 4 | -2 | 3   | 1.18    | 0.29  |
| 4 | -2 | 3   | 1.84    | 0.47  |
| 4 | -2 | 3   | 1.54    | 0.56  |
| 4 | -2 | 3   | 2.40    | 0.63  |
| 4 | -2 | 4   | 32.74   | 1.83  |
| 4 | -2 | 4   | 35.76   | 1.53  |
| 4 | -2 | 4   | 35.25   | 1.26  |
| 4 | -2 | 4   | 33.40   | 1.75  |
| 4 | -2 | 4   | 34.90   | 1.73  |
| 4 | -2 | 5   | 0.33    | 0.36  |
| 4 | -2 | 5   | 3.77    | 0.72  |
| 4 | -2 | 6   | 41.38   | 1.99  |
| 4 | -2 | 6   | 40.88   | 1.98  |
| 4 | -2 | 7   | 66.94   | 2.99  |
| 4 | -2 | 8   | 609.03  | 10.37 |
| 4 | -2 | 8   | 632.42  | 9.98  |
| 4 | -1 | -15 | 14.55   | 1.02  |
| 4 | -1 | -15 | 13.55   | 1.14  |
| 4 | -1 | -14 | 37.85   | 2.35  |
| 4 | -1 | -14 | 46.26   | 2.37  |
| 4 | -1 | -14 | 51.09   | 1.91  |
| 4 | -1 | -14 | 42.25   | 2.92  |
| 4 | -1 | -13 | 6.79    | 1.44  |
| 4 | -1 | -13 | 8.10    | 1.32  |
| 4 | -1 | -13 | 6.55    | 1.03  |
| 4 | -1 | -13 | 5.98    | 1.71  |

## CIF 31

|   |    |     |        |      |
|---|----|-----|--------|------|
| 4 | -1 | -13 | 7.85   | 1.33 |
| 4 | -1 | -12 | 153.34 | 5.71 |
| 4 | -1 | -12 | 145.67 | 4.78 |
| 4 | -1 | -12 | 160.90 | 6.13 |
| 4 | -1 | -11 | 222.61 | 6.96 |
| 4 | -1 | -11 | 223.07 | 5.96 |
| 4 | -1 | -11 | 220.75 | 7.12 |
| 4 | -1 | -11 | 195.88 | 6.59 |
| 4 | -1 | -11 | 201.80 | 6.03 |
| 4 | -1 | -11 | 231.98 | 6.05 |
| 4 | -1 | -10 | 362.24 | 8.50 |
| 4 | -1 | -10 | 404.90 | 9.20 |
| 4 | -1 | -10 | 384.20 | 7.79 |
| 4 | -1 | -10 | 410.59 | 9.42 |
| 4 | -1 | -10 | 370.35 | 8.88 |
| 4 | -1 | -10 | 354.51 | 8.07 |
| 4 | -1 | -10 | 352.47 | 7.49 |
| 4 | -1 | -10 | 380.39 | 7.83 |
| 4 | -1 | -9  | 176.56 | 5.52 |
| 4 | -1 | -9  | 181.14 | 4.86 |
| 4 | -1 | -9  | 176.23 | 5.19 |
| 4 | -1 | -9  | 175.46 | 5.69 |
| 4 | -1 | -9  | 177.70 | 5.66 |
| 4 | -1 | -9  | 186.48 | 4.63 |
| 4 | -1 | -9  | 178.75 | 5.73 |
| 4 | -1 | -9  | 173.18 | 5.11 |
| 4 | -1 | -9  | 180.56 | 4.87 |
| 4 | -1 | -9  | 191.00 | 5.21 |
| 4 | -1 | -8  | 378.91 | 7.74 |
| 4 | -1 | -8  | 381.42 | 6.80 |
| 4 | -1 | -8  | 372.69 | 6.78 |
| 4 | -1 | -8  | 362.04 | 6.90 |
| 4 | -1 | -8  | 374.54 | 7.48 |
| 4 | -1 | -8  | 348.09 | 7.62 |
| 4 | -1 | -8  | 397.45 | 8.04 |
| 4 | -1 | -8  | 372.84 | 7.72 |
| 4 | -1 | -8  | 413.60 | 8.27 |
| 4 | -1 | -8  | 365.90 | 6.72 |
| 4 | -1 | -8  | 387.10 | 7.50 |
| 4 | -1 | -7  | 4.30   | 0.98 |
| 4 | -1 | -7  | 4.12   | 0.77 |

## CIF 31

|   |    |    |       |      |
|---|----|----|-------|------|
| 4 | -1 | -7 | 4.37  | 0.89 |
| 4 | -1 | -7 | 3.12  | 0.77 |
| 4 | -1 | -7 | 4.59  | 0.91 |
| 4 | -1 | -7 | 6.37  | 0.97 |
| 4 | -1 | -7 | 5.98  | 1.06 |
| 4 | -1 | -7 | 7.59  | 1.22 |
| 4 | -1 | -7 | 4.22  | 1.03 |
| 4 | -1 | -7 | 5.33  | 1.01 |
| 4 | -1 | -7 | 5.31  | 0.95 |
| 4 | -1 | -7 | 5.69  | 0.99 |
| 4 | -1 | -6 | 35.79 | 2.00 |
| 4 | -1 | -6 | 36.83 | 1.93 |
| 4 | -1 | -6 | 34.47 | 1.99 |
| 4 | -1 | -6 | 40.10 | 1.94 |
| 4 | -1 | -6 | 29.19 | 1.86 |
| 4 | -1 | -6 | 33.09 | 1.88 |
| 4 | -1 | -6 | 35.79 | 1.91 |
| 4 | -1 | -6 | 33.45 | 1.88 |
| 4 | -1 | -6 | 28.16 | 1.62 |
| 4 | -1 | -6 | 37.96 | 2.04 |
| 4 | -1 | -6 | 32.73 | 1.86 |
| 4 | -1 | -6 | 38.27 | 1.98 |
| 4 | -1 | -6 | 32.36 | 1.91 |
| 4 | -1 | -6 | 36.03 | 1.56 |
| 4 | -1 | -6 | 31.55 | 1.57 |
| 4 | -1 | -6 | 37.06 | 1.80 |
| 4 | -1 | -6 | 44.64 | 2.07 |
| 4 | -1 | -6 | 34.51 | 1.89 |
| 4 | -1 | -5 | 29.46 | 1.68 |
| 4 | -1 | -5 | 41.22 | 1.85 |
| 4 | -1 | -5 | 29.86 | 2.16 |
| 4 | -1 | -5 | 40.40 | 1.82 |
| 4 | -1 | -5 | 42.52 | 1.97 |
| 4 | -1 | -5 | 35.80 | 1.63 |
| 4 | -1 | -5 | 32.91 | 2.03 |
| 4 | -1 | -5 | 37.47 | 1.82 |
| 4 | -1 | -5 | 39.07 | 2.09 |
| 4 | -1 | -5 | 42.98 | 1.79 |
| 4 | -1 | -5 | 36.11 | 1.83 |
| 4 | -1 | -5 | 40.71 | 2.07 |
| 4 | -1 | -5 | 40.28 | 1.67 |

## CIF 31

|   |    |    |         |       |
|---|----|----|---------|-------|
| 4 | -1 | -5 | 39.66   | 1.83  |
| 4 | -1 | -4 | 467.92  | 7.68  |
| 4 | -1 | -4 | 528.15  | 6.93  |
| 4 | -1 | -4 | 509.95  | 7.01  |
| 4 | -1 | -4 | 517.52  | 7.45  |
| 4 | -1 | -4 | 435.67  | 6.13  |
| 4 | -1 | -4 | 475.02  | 6.80  |
| 4 | -1 | -4 | 488.51  | 6.49  |
| 4 | -1 | -4 | 500.76  | 7.16  |
| 4 | -1 | -4 | 464.49  | 7.38  |
| 4 | -1 | -4 | 518.61  | 7.00  |
| 4 | -1 | -4 | 566.19  | 7.64  |
| 4 | -1 | -3 | 6.31    | 0.87  |
| 4 | -1 | -3 | 6.06    | 0.73  |
| 4 | -1 | -3 | 6.20    | 0.84  |
| 4 | -1 | -3 | 7.32    | 0.74  |
| 4 | -1 | -3 | 6.14    | 0.76  |
| 4 | -1 | -3 | 4.73    | 0.60  |
| 4 | -1 | -3 | 8.50    | 0.97  |
| 4 | -1 | -3 | 6.70    | 0.80  |
| 4 | -1 | -3 | 8.07    | 0.91  |
| 4 | -1 | -2 | 230.74  | 4.09  |
| 4 | -1 | -2 | 225.90  | 3.62  |
| 4 | -1 | -2 | 222.75  | 3.92  |
| 4 | -1 | -2 | 241.19  | 3.68  |
| 4 | -1 | -2 | 233.89  | 4.00  |
| 4 | -1 | -2 | 201.54  | 3.17  |
| 4 | -1 | -2 | 224.69  | 4.12  |
| 4 | -1 | -2 | 249.29  | 4.53  |
| 4 | -1 | -1 | 1100.61 | 10.70 |
| 4 | -1 | -1 | 998.62  | 9.07  |
| 4 | -1 | -1 | 1052.02 | 11.27 |
| 4 | -1 | -1 | 988.91  | 10.01 |
| 4 | -1 | -1 | 1136.00 | 11.68 |
| 4 | -1 | -1 | 1142.35 | 11.71 |
| 4 | -1 | 0  | 236.42  | 3.54  |
| 4 | -1 | 0  | 263.04  | 4.33  |
| 4 | -1 | 0  | 224.90  | 2.43  |
| 4 | -1 | 0  | 239.52  | 4.35  |
| 4 | -1 | 0  | 225.63  | 3.18  |
| 4 | -1 | 0  | 258.80  | 4.78  |

## CIF 31

|   |    |     |        |      |
|---|----|-----|--------|------|
| 4 | -1 | 1   | 402.45 | 4.97 |
| 4 | -1 | 1   | 372.42 | 3.94 |
| 4 | -1 | 1   | 362.80 | 4.67 |
| 4 | -1 | 1   | 403.94 | 5.98 |
| 4 | -1 | 1   | 381.73 | 4.56 |
| 4 | -1 | 1   | 375.57 | 5.84 |
| 4 | -1 | 2   | 46.21  | 1.42 |
| 4 | -1 | 2   | 50.41  | 1.91 |
| 4 | -1 | 2   | 45.47  | 1.33 |
| 4 | -1 | 2   | 50.14  | 2.04 |
| 4 | -1 | 2   | 50.02  | 2.00 |
| 4 | -1 | 2   | 43.93  | 1.10 |
| 4 | -1 | 3   | 131.35 | 3.51 |
| 4 | -1 | 3   | 123.11 | 3.00 |
| 4 | -1 | 3   | 133.74 | 3.41 |
| 4 | -1 | 3   | 135.19 | 3.42 |
| 4 | -1 | 3   | 128.92 | 2.67 |
| 4 | -1 | 4   | 50.12  | 1.74 |
| 4 | -1 | 4   | 50.42  | 2.15 |
| 4 | -1 | 5   | 39.70  | 1.70 |
| 4 | -1 | 5   | 39.20  | 1.99 |
| 4 | -1 | 6   | 196.64 | 4.25 |
| 4 | -1 | 6   | 194.77 | 4.89 |
| 4 | -1 | 6   | 205.87 | 4.90 |
| 4 | -1 | 6   | 207.15 | 4.71 |
| 4 | -1 | 7   | 397.75 | 7.65 |
| 4 | -1 | 7   | 405.92 | 7.25 |
| 4 | 0  | -15 | 221.03 | 4.58 |
| 4 | 0  | -15 | 254.89 | 4.91 |
| 4 | 0  | -14 | 5.28   | 1.33 |
| 4 | 0  | -14 | 7.51   | 1.19 |
| 4 | 0  | -14 | 7.26   | 1.69 |
| 4 | 0  | -14 | 7.96   | 1.29 |
| 4 | 0  | -13 | 287.22 | 6.92 |
| 4 | 0  | -13 | 305.57 | 5.60 |
| 4 | 0  | -13 | 336.17 | 9.20 |
| 4 | 0  | -13 | 311.34 | 8.28 |
| 4 | 0  | -13 | 327.12 | 7.13 |
| 4 | 0  | -12 | 122.27 | 4.46 |
| 4 | 0  | -12 | 113.08 | 4.66 |
| 4 | 0  | -12 | 114.70 | 4.18 |



## CIF 31

|   |   |     |        |       |
|---|---|-----|--------|-------|
| 4 | 0 | -11 | 870.83 | 15.19 |
| 4 | 0 | -11 | 851.35 | 13.36 |
| 4 | 0 | -11 | 788.80 | 12.61 |
| 4 | 0 | -11 | 768.66 | 14.17 |
| 4 | 0 | -11 | 809.72 | 13.62 |
| 4 | 0 | -11 | 773.70 | 12.17 |
| 4 | 0 | -10 | 208.90 | 6.43  |
| 4 | 0 | -10 | 262.09 | 7.37  |
| 4 | 0 | -10 | 251.43 | 6.65  |
| 4 | 0 | -10 | 243.91 | 6.05  |
| 4 | 0 | -10 | 202.86 | 6.52  |
| 4 | 0 | -10 | 226.38 | 6.48  |
| 4 | 0 | -10 | 230.45 | 5.67  |
| 4 | 0 | -9  | 3.35   | 1.16  |
| 4 | 0 | -9  | 3.14   | 0.82  |
| 4 | 0 | -9  | 3.96   | 1.21  |
| 4 | 0 | -9  | 2.24   | 1.07  |
| 4 | 0 | -9  | 1.79   | 0.74  |
| 4 | 0 | -9  | 3.21   | 1.01  |
| 4 | 0 | -9  | 2.73   | 1.11  |
| 4 | 0 | -9  | 2.11   | 1.00  |
| 4 | 0 | -9  | 2.70   | 0.86  |
| 4 | 0 | -8  | 189.67 | 5.35  |
| 4 | 0 | -8  | 202.40 | 5.10  |
| 4 | 0 | -8  | 182.02 | 4.57  |
| 4 | 0 | -8  | 190.06 | 5.61  |
| 4 | 0 | -8  | 174.84 | 4.18  |
| 4 | 0 | -8  | 171.60 | 4.38  |
| 4 | 0 | -8  | 191.49 | 5.20  |
| 4 | 0 | -8  | 204.40 | 5.67  |
| 4 | 0 | -8  | 186.38 | 5.26  |
| 4 | 0 | -8  | 189.48 | 5.00  |
| 4 | 0 | -8  | 193.11 | 5.34  |
| 4 | 0 | -8  | 152.00 | 4.03  |
| 4 | 0 | -8  | 181.73 | 5.06  |
| 4 | 0 | -7  | 9.25   | 1.11  |
| 4 | 0 | -7  | 10.18  | 1.26  |
| 4 | 0 | -7  | 4.43   | 1.03  |
| 4 | 0 | -7  | 10.54  | 1.09  |
| 4 | 0 | -7  | 10.25  | 1.25  |
| 4 | 0 | -7  | 7.74   | 1.13  |

## CIF 31

|   |   |    |         |       |
|---|---|----|---------|-------|
| 4 | 0 | -7 | 6.41    | 1.12  |
| 4 | 0 | -7 | 9.97    | 1.24  |
| 4 | 0 | -7 | 7.74    | 1.13  |
| 4 | 0 | -7 | 11.69   | 1.26  |
| 4 | 0 | -7 | 7.33    | 1.16  |
| 4 | 0 | -7 | 8.05    | 1.17  |
| 4 | 0 | -7 | 8.34    | 0.96  |
| 4 | 0 | -7 | 7.24    | 1.06  |
| 4 | 0 | -6 | 4868.59 | 42.28 |
| 4 | 0 | -6 | 4524.88 | 41.87 |
| 4 | 0 | -6 | 4281.06 | 40.21 |
| 4 | 0 | -6 | 4259.20 | 41.67 |
| 4 | 0 | -6 | 4528.63 | 41.98 |
| 4 | 0 | -6 | 4771.71 | 42.36 |
| 4 | 0 | -6 | 4393.91 | 41.19 |
| 4 | 0 | -6 | 4577.82 | 42.01 |
| 4 | 0 | -6 | 4323.27 | 40.35 |
| 4 | 0 | -6 | 4501.16 | 40.99 |
| 4 | 0 | -6 | 4168.97 | 41.37 |
| 4 | 0 | -6 | 4327.34 | 41.81 |
| 4 | 0 | -6 | 4863.25 | 40.25 |
| 4 | 0 | -6 | 4435.82 | 40.79 |
| 4 | 0 | -6 | 4813.86 | 41.22 |
| 4 | 0 | -6 | 4387.34 | 41.71 |
| 4 | 0 | -5 | 389.13  | 6.45  |
| 4 | 0 | -5 | 307.00  | 6.58  |
| 4 | 0 | -5 | 399.68  | 6.27  |
| 4 | 0 | -5 | 386.90  | 5.94  |
| 4 | 0 | -5 | 330.45  | 6.78  |
| 4 | 0 | -5 | 337.40  | 5.80  |
| 4 | 0 | -5 | 403.20  | 6.83  |
| 4 | 0 | -5 | 384.90  | 6.07  |
| 4 | 0 | -5 | 347.44  | 6.05  |
| 4 | 0 | -5 | 395.20  | 6.77  |
| 4 | 0 | -5 | 412.67  | 6.03  |
| 4 | 0 | -5 | 384.56  | 6.36  |
| 4 | 0 | -5 | 419.37  | 6.51  |
| 4 | 0 | -4 | 2947.30 | 26.05 |
| 4 | 0 | -4 | 2754.41 | 25.59 |
| 4 | 0 | -4 | 2843.57 | 25.47 |
| 4 | 0 | -4 | 2876.23 | 26.30 |

## CIF 31

|   |   |    |         |       |
|---|---|----|---------|-------|
| 4 | 0 | -4 | 2495.40 | 26.56 |
| 4 | 0 | -4 | 2355.90 | 24.65 |
| 4 | 0 | -4 | 2877.30 | 25.78 |
| 4 | 0 | -4 | 2490.65 | 24.97 |
| 4 | 0 | -4 | 3027.62 | 25.99 |
| 4 | 0 | -4 | 3014.64 | 26.41 |
| 4 | 0 | -3 | 10.19   | 0.92  |
| 4 | 0 | -3 | 9.73    | 1.36  |
| 4 | 0 | -3 | 11.38   | 0.97  |
| 4 | 0 | -3 | 13.19   | 1.06  |
| 4 | 0 | -3 | 11.82   | 0.81  |
| 4 | 0 | -3 | 9.65    | 0.97  |
| 4 | 0 | -3 | 7.64    | 0.67  |
| 4 | 0 | -3 | 6.88    | 0.74  |
| 4 | 0 | -3 | 6.89    | 0.97  |
| 4 | 0 | -3 | 10.91   | 0.92  |
| 4 | 0 | -3 | 10.07   | 0.92  |
| 4 | 0 | -3 | 11.11   | 1.02  |
| 4 | 0 | -2 | 5976.20 | 53.47 |
| 4 | 0 | -2 | 5923.38 | 53.17 |
| 4 | 0 | -2 | 6730.46 | 53.89 |
| 4 | 0 | -2 | 6036.25 | 52.14 |
| 4 | 0 | -2 | 6217.44 | 53.17 |
| 4 | 0 | -2 | 6263.59 | 54.60 |
| 4 | 0 | -2 | 6463.50 | 54.23 |
| 4 | 0 | -2 | 6170.78 | 52.90 |
| 4 | 0 | -2 | 6808.27 | 54.88 |
| 4 | 0 | -1 | 1157.68 | 12.21 |
| 4 | 0 | -1 | 1127.18 | 11.95 |
| 4 | 0 | -1 | 1176.73 | 11.90 |
| 4 | 0 | -1 | 1231.17 | 13.02 |
| 4 | 0 | -1 | 1130.54 | 11.59 |
| 4 | 0 | -1 | 1064.94 | 10.84 |
| 4 | 0 | -1 | 1269.20 | 13.40 |
| 4 | 0 | -1 | 1286.19 | 12.73 |
| 4 | 0 | 0  | 522.97  | 5.64  |
| 4 | 0 | 0  | 510.78  | 6.49  |
| 4 | 0 | 0  | 462.76  | 6.15  |
| 4 | 0 | 0  | 532.44  | 7.26  |
| 4 | 0 | 0  | 500.35  | 6.07  |
| 4 | 0 | 0  | 533.52  | 7.51  |

## CIF 31

|   |   |     |         |       |
|---|---|-----|---------|-------|
| 4 | 0 | 0   | 567.00  | 7.28  |
| 4 | 0 | 0   | 488.40  | 4.97  |
| 4 | 0 | 0   | 511.38  | 6.64  |
| 4 | 0 | 1   | 1609.66 | 14.59 |
| 4 | 0 | 1   | 1601.81 | 16.40 |
| 4 | 0 | 1   | 1641.75 | 15.29 |
| 4 | 0 | 1   | 1486.32 | 15.45 |
| 4 | 0 | 1   | 1727.89 | 16.99 |
| 4 | 0 | 1   | 1513.15 | 14.29 |
| 4 | 0 | 2   | 136.64  | 3.59  |
| 4 | 0 | 2   | 157.29  | 3.15  |
| 4 | 0 | 2   | 140.87  | 3.30  |
| 4 | 0 | 2   | 151.66  | 2.67  |
| 4 | 0 | 2   | 147.06  | 3.60  |
| 4 | 0 | 2   | 139.42  | 2.66  |
| 4 | 0 | 3   | 105.05  | 2.35  |
| 4 | 0 | 3   | 98.19   | 2.63  |
| 4 | 0 | 3   | 100.65  | 2.93  |
| 4 | 0 | 3   | 104.61  | 2.67  |
| 4 | 0 | 3   | 102.00  | 2.49  |
| 4 | 0 | 4   | 52.39   | 2.01  |
| 4 | 0 | 4   | 47.77   | 1.86  |
| 4 | 0 | 5   | 0.03    | 0.40  |
| 4 | 0 | 5   | 1.60    | 0.51  |
| 4 | 0 | 6   | 121.51  | 3.50  |
| 4 | 0 | 6   | 116.04  | 3.83  |
| 4 | 0 | 6   | 114.24  | 3.46  |
| 4 | 0 | 7   | 108.96  | 3.48  |
| 4 | 0 | 7   | 107.57  | 3.75  |
| 4 | 0 | 7   | 110.37  | 3.61  |
| 4 | 1 | -16 | 81.22   | 2.00  |
| 4 | 1 | -16 | 72.82   | 1.89  |
| 4 | 1 | -15 | 7.03    | 0.97  |
| 4 | 1 | -15 | 10.43   | 1.11  |
| 4 | 1 | -14 | 435.67  | 9.59  |
| 4 | 1 | -14 | 466.51  | 7.99  |
| 4 | 1 | -13 | 63.26   | 3.92  |
| 4 | 1 | -13 | 63.96   | 3.27  |
| 4 | 1 | -13 | 53.72   | 2.96  |
| 4 | 1 | -13 | 62.07   | 2.98  |
| 4 | 1 | -12 | 41.58   | 3.35  |

## CIF 31

|   |   |     |        |       |
|---|---|-----|--------|-------|
| 4 | 1 | -12 | 40.01  | 2.88  |
| 4 | 1 | -12 | 38.00  | 2.61  |
| 4 | 1 | -12 | 42.50  | 2.95  |
| 4 | 1 | -12 | 37.14  | 3.27  |
| 4 | 1 | -12 | 37.69  | 2.86  |
| 4 | 1 | -12 | 39.00  | 2.50  |
| 4 | 1 | -11 | 595.35 | 10.94 |
| 4 | 1 | -11 | 691.78 | 12.54 |
| 4 | 1 | -11 | 648.33 | 13.07 |
| 4 | 1 | -11 | 678.25 | 13.24 |
| 4 | 1 | -11 | 613.27 | 12.18 |
| 4 | 1 | -11 | 652.88 | 10.58 |
| 4 | 1 | -10 | 57.92  | 3.04  |
| 4 | 1 | -10 | 53.49  | 2.79  |
| 4 | 1 | -10 | 60.85  | 3.68  |
| 4 | 1 | -10 | 61.25  | 3.10  |
| 4 | 1 | -10 | 62.33  | 3.06  |
| 4 | 1 | -10 | 56.73  | 2.93  |
| 4 | 1 | -10 | 57.62  | 3.49  |
| 4 | 1 | -10 | 45.39  | 3.20  |
| 4 | 1 | -10 | 48.52  | 3.23  |
| 4 | 1 | -10 | 46.58  | 2.55  |
| 4 | 1 | -9  | 235.19 | 5.86  |
| 4 | 1 | -9  | 204.34 | 5.51  |
| 4 | 1 | -9  | 218.24 | 5.94  |
| 4 | 1 | -9  | 234.37 | 6.65  |
| 4 | 1 | -9  | 216.43 | 5.75  |
| 4 | 1 | -9  | 219.33 | 5.46  |
| 4 | 1 | -9  | 209.11 | 5.99  |
| 4 | 1 | -9  | 218.92 | 5.73  |
| 4 | 1 | -9  | 213.84 | 6.22  |
| 4 | 1 | -9  | 185.48 | 5.99  |
| 4 | 1 | -9  | 215.27 | 6.22  |
| 4 | 1 | -9  | 212.33 | 5.17  |
| 4 | 1 | -9  | 212.27 | 5.03  |
| 4 | 1 | -8  | 15.96  | 1.78  |
| 4 | 1 | -8  | 1.98   | 0.82  |
| 4 | 1 | -8  | 1.26   | 0.57  |
| 4 | 1 | -8  | 2.41   | 0.71  |
| 4 | 1 | -8  | 1.93   | 1.02  |
| 4 | 1 | -8  | 2.11   | 0.95  |

## CIF 31

|   |   |    |        |      |
|---|---|----|--------|------|
| 4 | 1 | -8 | 1.43   | 0.95 |
| 4 | 1 | -8 | 1.61   | 0.89 |
| 4 | 1 | -8 | 1.07   | 0.85 |
| 4 | 1 | -8 | 10.44  | 1.41 |
| 4 | 1 | -8 | 0.76   | 0.96 |
| 4 | 1 | -8 | 1.23   | 0.97 |
| 4 | 1 | -8 | 8.80   | 1.15 |
| 4 | 1 | -8 | 0.96   | 0.59 |
| 4 | 1 | -7 | 17.69  | 1.62 |
| 4 | 1 | -7 | 13.89  | 1.42 |
| 4 | 1 | -7 | 18.53  | 1.66 |
| 4 | 1 | -7 | 15.63  | 1.56 |
| 4 | 1 | -7 | 21.00  | 1.77 |
| 4 | 1 | -7 | 14.24  | 1.17 |
| 4 | 1 | -7 | 19.24  | 1.73 |
| 4 | 1 | -7 | 17.69  | 1.60 |
| 4 | 1 | -7 | 16.14  | 1.60 |
| 4 | 1 | -7 | 16.07  | 1.43 |
| 4 | 1 | -7 | 17.34  | 1.41 |
| 4 | 1 | -7 | 15.11  | 1.57 |
| 4 | 1 | -7 | 16.19  | 1.50 |
| 4 | 1 | -7 | 18.59  | 1.74 |
| 4 | 1 | -7 | 17.93  | 1.46 |
| 4 | 1 | -7 | 16.08  | 1.51 |
| 4 | 1 | -6 | 107.08 | 3.41 |
| 4 | 1 | -6 | 117.32 | 3.93 |
| 4 | 1 | -6 | 116.24 | 3.45 |
| 4 | 1 | -6 | 115.33 | 3.78 |
| 4 | 1 | -6 | 99.50  | 3.52 |
| 4 | 1 | -6 | 108.34 | 2.93 |
| 4 | 1 | -6 | 97.30  | 3.35 |
| 4 | 1 | -6 | 81.01  | 3.59 |
| 4 | 1 | -6 | 124.00 | 3.63 |
| 4 | 1 | -6 | 121.71 | 3.98 |
| 4 | 1 | -6 | 100.36 | 3.15 |
| 4 | 1 | -6 | 98.86  | 3.29 |
| 4 | 1 | -6 | 116.57 | 3.42 |
| 4 | 1 | -6 | 99.68  | 3.33 |
| 4 | 1 | -6 | 86.97  | 3.31 |
| 4 | 1 | -6 | 120.06 | 3.10 |
| 4 | 1 | -6 | 103.07 | 3.34 |

## CIF 31

|   |   |    |         |       |
|---|---|----|---------|-------|
| 4 | 1 | -6 | 114.26  | 3.29  |
| 4 | 1 | -6 | 102.55  | 3.47  |
| 4 | 1 | -5 | 3.88    | 0.75  |
| 4 | 1 | -5 | 8.04    | 1.52  |
| 4 | 1 | -5 | 2.90    | 0.75  |
| 4 | 1 | -5 | 5.56    | 0.81  |
| 4 | 1 | -5 | 3.98    | 0.85  |
| 4 | 1 | -5 | 2.55    | 0.75  |
| 4 | 1 | -5 | 7.06    | 1.37  |
| 4 | 1 | -5 | 3.10    | 0.64  |
| 4 | 1 | -5 | 2.70    | 0.92  |
| 4 | 1 | -5 | 3.11    | 0.72  |
| 4 | 1 | -5 | 3.69    | 0.66  |
| 4 | 1 | -5 | 3.20    | 0.84  |
| 4 | 1 | -5 | 3.07    | 0.87  |
| 4 | 1 | -5 | 5.22    | 0.79  |
| 4 | 1 | -4 | 2041.72 | 20.37 |
| 4 | 1 | -4 | 2156.43 | 20.22 |
| 4 | 1 | -4 | 1926.74 | 19.62 |
| 4 | 1 | -4 | 2019.43 | 20.58 |
| 4 | 1 | -4 | 1941.79 | 19.28 |
| 4 | 1 | -4 | 2056.56 | 20.04 |
| 4 | 1 | -4 | 2054.03 | 20.30 |
| 4 | 1 | -4 | 2269.64 | 21.66 |
| 4 | 1 | -4 | 2160.83 | 20.64 |
| 4 | 1 | -4 | 2122.43 | 21.37 |
| 4 | 1 | -3 | 296.42  | 4.85  |
| 4 | 1 | -3 | 277.89  | 4.93  |
| 4 | 1 | -3 | 311.26  | 5.07  |
| 4 | 1 | -3 | 287.90  | 4.51  |
| 4 | 1 | -3 | 289.44  | 5.05  |
| 4 | 1 | -3 | 258.39  | 5.49  |
| 4 | 1 | -3 | 296.67  | 4.67  |
| 4 | 1 | -3 | 259.50  | 5.24  |
| 4 | 1 | -3 | 298.01  | 5.20  |
| 4 | 1 | -3 | 272.77  | 4.78  |
| 4 | 1 | -3 | 285.67  | 4.70  |
| 4 | 1 | -2 | 1472.86 | 14.76 |
| 4 | 1 | -2 | 1429.40 | 17.27 |
| 4 | 1 | -2 | 1423.78 | 15.05 |
| 4 | 1 | -2 | 1431.44 | 15.13 |

## CIF 31

|   |   |    |         |       |
|---|---|----|---------|-------|
| 4 | 1 | -2 | 1400.37 | 14.20 |
| 4 | 1 | -2 | 1390.56 | 15.80 |
| 4 | 1 | -2 | 1490.45 | 15.03 |
| 4 | 1 | -2 | 1541.32 | 14.52 |
| 4 | 1 | -2 | 1550.67 | 15.27 |
| 4 | 1 | -1 | 35.32   | 1.39  |
| 4 | 1 | -1 | 29.69   | 1.47  |
| 4 | 1 | -1 | 37.55   | 1.79  |
| 4 | 1 | -1 | 34.04   | 1.67  |
| 4 | 1 | -1 | 30.85   | 1.43  |
| 4 | 1 | -1 | 35.96   | 1.66  |
| 4 | 1 | -1 | 32.15   | 1.30  |
| 4 | 1 | 0  | 5309.61 | 44.74 |
| 4 | 1 | 0  | 5309.13 | 45.62 |
| 4 | 1 | 0  | 5357.29 | 46.43 |
| 4 | 1 | 0  | 5622.75 | 45.48 |
| 4 | 1 | 0  | 5657.82 | 47.17 |
| 4 | 1 | 1  | 888.59  | 9.89  |
| 4 | 1 | 1  | 907.77  | 9.95  |
| 4 | 1 | 1  | 896.78  | 11.13 |
| 4 | 1 | 1  | 959.09  | 10.61 |
| 4 | 1 | 1  | 938.93  | 10.78 |
| 4 | 1 | 1  | 930.25  | 11.58 |
| 4 | 1 | 2  | 279.42  | 4.86  |
| 4 | 1 | 2  | 257.67  | 5.16  |
| 4 | 1 | 2  | 246.99  | 4.13  |
| 4 | 1 | 2  | 233.18  | 4.63  |
| 4 | 1 | 2  | 264.98  | 4.66  |
| 4 | 1 | 2  | 244.41  | 5.00  |
| 4 | 1 | 2  | 238.28  | 3.83  |
| 4 | 1 | 3  | 8.00    | 0.94  |
| 4 | 1 | 3  | 8.12    | 0.80  |
| 4 | 1 | 3  | 8.53    | 0.76  |
| 4 | 1 | 4  | 11.03   | 1.09  |
| 4 | 1 | 4  | 10.81   | 0.95  |
| 4 | 1 | 4  | 10.57   | 0.97  |
| 4 | 1 | 5  | 2.27    | 0.69  |
| 4 | 1 | 5  | 2.14    | 0.61  |
| 4 | 1 | 5  | 1.99    | 0.53  |
| 4 | 1 | 6  | 34.16   | 2.03  |
| 4 | 1 | 6  | 31.56   | 1.83  |



## CIF 31

|   |   |     |        |       |
|---|---|-----|--------|-------|
| 4 | 1 | 6   | 35.38  | 1.84  |
| 4 | 1 | 7   | 839.23 | 11.88 |
| 4 | 2 | -16 | 204.95 | 3.39  |
| 4 | 2 | -15 | 1.13   | 1.00  |
| 4 | 2 | -15 | -0.05  | 0.64  |
| 4 | 2 | -14 | 65.03  | 3.76  |
| 4 | 2 | -14 | 68.22  | 3.20  |
| 4 | 2 | -14 | 54.93  | 2.77  |
| 4 | 2 | -14 | 60.23  | 3.66  |
| 4 | 2 | -14 | 75.13  | 3.01  |
| 4 | 2 | -13 | 402.01 | 10.15 |
| 4 | 2 | -13 | 421.17 | 9.33  |
| 4 | 2 | -13 | 377.84 | 8.16  |
| 4 | 2 | -13 | 368.77 | 9.73  |
| 4 | 2 | -13 | 415.09 | 7.91  |
| 4 | 2 | -12 | 273.08 | 8.36  |
| 4 | 2 | -12 | 279.74 | 7.81  |
| 4 | 2 | -12 | 311.85 | 7.27  |
| 4 | 2 | -12 | 267.29 | 7.01  |
| 4 | 2 | -12 | 253.57 | 8.09  |
| 4 | 2 | -12 | 285.10 | 7.89  |
| 4 | 2 | -12 | 246.89 | 7.59  |
| 4 | 2 | -12 | 239.93 | 6.04  |
| 4 | 2 | -11 | 56.31  | 3.12  |
| 4 | 2 | -11 | 68.68  | 3.53  |
| 4 | 2 | -11 | 60.60  | 3.25  |
| 4 | 2 | -11 | 68.19  | 3.99  |
| 4 | 2 | -11 | 60.35  | 3.31  |
| 4 | 2 | -11 | 66.96  | 3.89  |
| 4 | 2 | -11 | 58.43  | 3.79  |
| 4 | 2 | -11 | 59.73  | 3.73  |
| 4 | 2 | -11 | 64.69  | 3.02  |
| 4 | 2 | -10 | 15.42  | 1.72  |
| 4 | 2 | -10 | 14.51  | 1.72  |
| 4 | 2 | -10 | 13.05  | 1.75  |
| 4 | 2 | -10 | 13.48  | 1.64  |
| 4 | 2 | -10 | 15.72  | 2.15  |
| 4 | 2 | -10 | 14.23  | 1.75  |
| 4 | 2 | -10 | 14.98  | 1.99  |
| 4 | 2 | -10 | 16.20  | 2.15  |
| 4 | 2 | -10 | 14.02  | 1.55  |

## CIF 31

|   |   |     |        |       |
|---|---|-----|--------|-------|
| 4 | 2 | -10 | 14.58  | 1.50  |
| 4 | 2 | -9  | 686.51 | 12.17 |
| 4 | 2 | -9  | 738.55 | 11.62 |
| 4 | 2 | -9  | 742.19 | 12.02 |
| 4 | 2 | -9  | 812.42 | 13.59 |
| 4 | 2 | -9  | 716.30 | 11.44 |
| 4 | 2 | -9  | 792.69 | 12.55 |
| 4 | 2 | -9  | 768.69 | 12.80 |
| 4 | 2 | -9  | 686.19 | 12.41 |
| 4 | 2 | -9  | 731.62 | 12.85 |
| 4 | 2 | -9  | 766.09 | 12.54 |
| 4 | 2 | -9  | 736.88 | 11.52 |
| 4 | 2 | -9  | 735.54 | 10.56 |
| 4 | 2 | -8  | 286.57 | 7.03  |
| 4 | 2 | -8  | 310.67 | 6.67  |
| 4 | 2 | -8  | 292.13 | 6.92  |
| 4 | 2 | -8  | 298.07 | 7.28  |
| 4 | 2 | -8  | 280.63 | 6.23  |
| 4 | 2 | -8  | 302.29 | 7.07  |
| 4 | 2 | -8  | 299.68 | 7.05  |
| 4 | 2 | -8  | 304.81 | 7.11  |
| 4 | 2 | -8  | 291.14 | 6.26  |
| 4 | 2 | -8  | 292.80 | 6.99  |
| 4 | 2 | -8  | 261.70 | 6.83  |
| 4 | 2 | -8  | 306.47 | 6.72  |
| 4 | 2 | -8  | 313.54 | 5.81  |
| 4 | 2 | -7  | 3.40   | 0.96  |
| 4 | 2 | -7  | 2.01   | 0.87  |
| 4 | 2 | -7  | 2.09   | 0.90  |
| 4 | 2 | -7  | 2.50   | 1.00  |
| 4 | 2 | -7  | 2.09   | 0.62  |
| 4 | 2 | -7  | 3.39   | 0.85  |
| 4 | 2 | -7  | 2.12   | 0.98  |
| 4 | 2 | -7  | 2.60   | 0.88  |
| 4 | 2 | -7  | 1.82   | 1.01  |
| 4 | 2 | -7  | 6.29   | 1.04  |
| 4 | 2 | -7  | 2.02   | 0.73  |
| 4 | 2 | -7  | 1.93   | 0.81  |
| 4 | 2 | -7  | 1.16   | 0.90  |
| 4 | 2 | -7  | 1.72   | 0.99  |
| 4 | 2 | -7  | 1.32   | 0.83  |

## CIF 31

|   |   |    |         |       |
|---|---|----|---------|-------|
| 4 | 2 | -6 | 475.69  | 7.95  |
| 4 | 2 | -6 | 499.98  | 8.84  |
| 4 | 2 | -6 | 445.64  | 7.56  |
| 4 | 2 | -6 | 445.60  | 6.68  |
| 4 | 2 | -6 | 396.41  | 7.30  |
| 4 | 2 | -6 | 452.30  | 8.00  |
| 4 | 2 | -6 | 429.06  | 8.37  |
| 4 | 2 | -6 | 440.66  | 7.45  |
| 4 | 2 | -6 | 476.26  | 8.61  |
| 4 | 2 | -6 | 482.49  | 8.27  |
| 4 | 2 | -6 | 449.50  | 7.70  |
| 4 | 2 | -6 | 454.56  | 7.75  |
| 4 | 2 | -6 | 481.62  | 8.35  |
| 4 | 2 | -6 | 450.62  | 8.22  |
| 4 | 2 | -6 | 459.51  | 7.20  |
| 4 | 2 | -6 | 458.95  | 8.13  |
| 4 | 2 | -5 | 899.61  | 11.54 |
| 4 | 2 | -5 | 964.02  | 13.33 |
| 4 | 2 | -5 | 877.69  | 11.65 |
| 4 | 2 | -5 | 1005.51 | 11.18 |
| 4 | 2 | -5 | 912.78  | 11.53 |
| 4 | 2 | -5 | 917.23  | 12.08 |
| 4 | 2 | -5 | 944.02  | 12.35 |
| 4 | 2 | -5 | 963.29  | 12.77 |
| 4 | 2 | -5 | 910.09  | 12.69 |
| 4 | 2 | -5 | 966.56  | 11.59 |
| 4 | 2 | -5 | 984.10  | 12.05 |
| 4 | 2 | -5 | 989.95  | 12.68 |
| 4 | 2 | -5 | 929.93  | 11.62 |
| 4 | 2 | -5 | 950.06  | 12.68 |
| 4 | 2 | -4 | 494.51  | 7.17  |
| 4 | 2 | -4 | 505.95  | 7.05  |
| 4 | 2 | -4 | 513.46  | 7.32  |
| 4 | 2 | -4 | 520.27  | 8.32  |
| 4 | 2 | -4 | 450.77  | 6.73  |
| 4 | 2 | -4 | 464.99  | 7.76  |
| 4 | 2 | -4 | 472.18  | 7.39  |
| 4 | 2 | -4 | 497.92  | 7.55  |
| 4 | 2 | -4 | 489.38  | 8.19  |
| 4 | 2 | -4 | 532.51  | 6.85  |
| 4 | 2 | -3 | 22.75   | 1.24  |

## CIF 31

|   |   |    |         |       |
|---|---|----|---------|-------|
| 4 | 2 | -3 | 20.38   | 2.02  |
| 4 | 2 | -3 | 24.02   | 1.39  |
| 4 | 2 | -3 | 20.96   | 1.56  |
| 4 | 2 | -3 | 21.54   | 1.50  |
| 4 | 2 | -3 | 24.00   | 1.38  |
| 4 | 2 | -3 | 24.50   | 1.52  |
| 4 | 2 | -3 | 27.35   | 1.58  |
| 4 | 2 | -2 | 29.69   | 1.28  |
| 4 | 2 | -2 | 23.77   | 2.02  |
| 4 | 2 | -2 | 28.61   | 1.66  |
| 4 | 2 | -2 | 34.87   | 1.53  |
| 4 | 2 | -2 | 30.08   | 1.80  |
| 4 | 2 | -2 | 30.48   | 1.69  |
| 4 | 2 | -2 | 26.24   | 1.60  |
| 4 | 2 | -2 | 31.01   | 1.62  |
| 4 | 2 | -2 | 29.69   | 1.55  |
| 4 | 2 | -2 | 30.16   | 1.47  |
| 4 | 2 | -1 | 1856.97 | 22.68 |
| 4 | 2 | -1 | 2079.50 | 20.38 |
| 4 | 2 | -1 | 1812.81 | 19.09 |
| 4 | 2 | -1 | 1793.20 | 20.53 |
| 4 | 2 | -1 | 1917.51 | 20.03 |
| 4 | 2 | -1 | 2063.70 | 20.77 |
| 4 | 2 | -1 | 2250.44 | 20.38 |
| 4 | 2 | -1 | 2163.19 | 19.64 |
| 4 | 2 | 0  | 32.45   | 2.16  |
| 4 | 2 | 0  | 38.32   | 1.85  |
| 4 | 2 | 0  | 38.18   | 1.64  |
| 4 | 2 | 0  | 37.39   | 1.67  |
| 4 | 2 | 0  | 31.39   | 1.60  |
| 4 | 2 | 0  | 36.94   | 1.86  |
| 4 | 2 | 0  | 35.54   | 1.71  |
| 4 | 2 | 1  | 560.32  | 9.59  |
| 4 | 2 | 1  | 600.22  | 8.30  |
| 4 | 2 | 1  | 557.00  | 7.52  |
| 4 | 2 | 1  | 536.00  | 8.03  |
| 4 | 2 | 1  | 502.61  | 7.91  |
| 4 | 2 | 1  | 563.10  | 7.99  |
| 4 | 2 | 2  | 343.47  | 5.71  |
| 4 | 2 | 2  | 339.24  | 6.05  |
| 4 | 2 | 2  | 352.03  | 6.32  |

## CIF 31

|   |   |     |        |      |
|---|---|-----|--------|------|
| 4 | 2 | 3   | 551.88 | 9.58 |
| 4 | 2 | 3   | 550.73 | 7.95 |
| 4 | 2 | 4   | 106.54 | 3.56 |
| 4 | 2 | 4   | 114.19 | 3.29 |
| 4 | 2 | 5   | 4.85   | 1.04 |
| 4 | 2 | 5   | 6.88   | 0.99 |
| 4 | 2 | 6   | 250.15 | 5.97 |
| 4 | 2 | 6   | 259.20 | 5.44 |
| 4 | 2 | 7   | 537.05 | 8.80 |
| 4 | 3 | -16 | 40.74  | 1.29 |
| 4 | 3 | -15 | 6.91   | 1.00 |
| 4 | 3 | -15 | 73.48  | 2.37 |
| 4 | 3 | -14 | 67.38  | 3.84 |
| 4 | 3 | -14 | 74.92  | 3.58 |
| 4 | 3 | -14 | 68.18  | 2.79 |
| 4 | 3 | -13 | 190.70 | 6.37 |
| 4 | 3 | -13 | 180.32 | 5.29 |
| 4 | 3 | -13 | 149.30 | 5.24 |
| 4 | 3 | -13 | 170.76 | 5.13 |
| 4 | 3 | -13 | 163.07 | 6.08 |
| 4 | 3 | -13 | 164.70 | 4.63 |
| 4 | 3 | -12 | 44.23  | 3.30 |
| 4 | 3 | -12 | 41.02  | 2.76 |
| 4 | 3 | -12 | 37.32  | 2.72 |
| 4 | 3 | -12 | 32.68  | 2.48 |
| 4 | 3 | -12 | 35.25  | 2.99 |
| 4 | 3 | -12 | 40.53  | 2.84 |
| 4 | 3 | -12 | 36.00  | 3.07 |
| 4 | 3 | -12 | 35.42  | 2.99 |
| 4 | 3 | -12 | 44.11  | 2.54 |
| 4 | 3 | -11 | 222.91 | 6.12 |
| 4 | 3 | -11 | 219.81 | 6.55 |
| 4 | 3 | -11 | 219.47 | 7.63 |
| 4 | 3 | -11 | 246.00 | 7.60 |
| 4 | 3 | -11 | 255.18 | 7.16 |
| 4 | 3 | -11 | 210.17 | 6.20 |
| 4 | 3 | -11 | 255.34 | 7.99 |
| 4 | 3 | -11 | 244.11 | 7.08 |
| 4 | 3 | -11 | 230.79 | 7.46 |
| 4 | 3 | -11 | 242.00 | 7.70 |
| 4 | 3 | -11 | 222.51 | 6.19 |

## CIF 31

|   |   |     |         |       |
|---|---|-----|---------|-------|
| 4 | 3 | -11 | 214.96  | 5.53  |
| 4 | 3 | -10 | 5.88    | 1.33  |
| 4 | 3 | -10 | 6.35    | 1.37  |
| 4 | 3 | -10 | 5.81    | 1.71  |
| 4 | 3 | -10 | 5.87    | 1.28  |
| 4 | 3 | -10 | 7.00    | 1.49  |
| 4 | 3 | -10 | 5.93    | 1.50  |
| 4 | 3 | -10 | 7.02    | 1.46  |
| 4 | 3 | -10 | 7.73    | 1.88  |
| 4 | 3 | -10 | 7.03    | 1.78  |
| 4 | 3 | -10 | 5.96    | 1.35  |
| 4 | 3 | -10 | 4.84    | 1.04  |
| 4 | 3 | -9  | 820.86  | 12.67 |
| 4 | 3 | -9  | 833.89  | 13.68 |
| 4 | 3 | -9  | 794.31  | 12.73 |
| 4 | 3 | -9  | 964.27  | 16.20 |
| 4 | 3 | -9  | 885.78  | 14.15 |
| 4 | 3 | -9  | 820.21  | 13.85 |
| 4 | 3 | -9  | 817.43  | 13.70 |
| 4 | 3 | -9  | 821.16  | 12.55 |
| 4 | 3 | -9  | 815.07  | 13.05 |
| 4 | 3 | -9  | 854.55  | 13.32 |
| 4 | 3 | -9  | 860.82  | 11.73 |
| 4 | 3 | -9  | 908.08  | 14.72 |
| 4 | 3 | -8  | 74.72   | 3.29  |
| 4 | 3 | -8  | 72.04   | 3.54  |
| 4 | 3 | -8  | 67.29   | 3.45  |
| 4 | 3 | -8  | 85.39   | 4.39  |
| 4 | 3 | -8  | 70.48   | 3.02  |
| 4 | 3 | -8  | 71.21   | 3.43  |
| 4 | 3 | -8  | 65.57   | 3.46  |
| 4 | 3 | -8  | 70.90   | 3.57  |
| 4 | 3 | -8  | 66.68   | 3.26  |
| 4 | 3 | -8  | 69.43   | 3.21  |
| 4 | 3 | -8  | 69.68   | 2.96  |
| 4 | 3 | -8  | 68.08   | 3.56  |
| 4 | 3 | -8  | 71.93   | 3.43  |
| 4 | 3 | -7  | 935.89  | 13.39 |
| 4 | 3 | -7  | 975.57  | 13.25 |
| 4 | 3 | -7  | 1009.34 | 13.46 |
| 4 | 3 | -7  | 951.83  | 14.42 |

## CIF 31

|   |   |    |         |       |
|---|---|----|---------|-------|
| 4 | 3 | -7 | 1038.57 | 14.57 |
| 4 | 3 | -7 | 1077.89 | 16.59 |
| 4 | 3 | -7 | 993.42  | 13.35 |
| 4 | 3 | -7 | 961.69  | 13.83 |
| 4 | 3 | -7 | 1019.45 | 14.85 |
| 4 | 3 | -7 | 999.93  | 14.12 |
| 4 | 3 | -7 | 987.71  | 13.39 |
| 4 | 3 | -7 | 893.77  | 13.13 |
| 4 | 3 | -7 | 987.63  | 14.40 |
| 4 | 3 | -7 | 902.62  | 13.79 |
| 4 | 3 | -6 | 82.63   | 3.17  |
| 4 | 3 | -6 | 93.30   | 3.84  |
| 4 | 3 | -6 | 96.12   | 3.52  |
| 4 | 3 | -6 | 97.51   | 3.83  |
| 4 | 3 | -6 | 92.30   | 3.53  |
| 4 | 3 | -6 | 101.04  | 2.85  |
| 4 | 3 | -6 | 122.20  | 3.81  |
| 4 | 3 | -6 | 96.25   | 3.52  |
| 4 | 3 | -6 | 94.26   | 4.06  |
| 4 | 3 | -6 | 101.01  | 3.67  |
| 4 | 3 | -6 | 102.26  | 3.93  |
| 4 | 3 | -6 | 79.17   | 3.02  |
| 4 | 3 | -6 | 89.46   | 3.63  |
| 4 | 3 | -6 | 97.34   | 3.79  |
| 4 | 3 | -5 | 947.54  | 12.04 |
| 4 | 3 | -5 | 988.67  | 12.74 |
| 4 | 3 | -5 | 1056.82 | 13.80 |
| 4 | 3 | -5 | 1007.98 | 11.66 |
| 4 | 3 | -5 | 994.41  | 15.16 |
| 4 | 3 | -5 | 933.18  | 12.60 |
| 4 | 3 | -5 | 941.77  | 12.44 |
| 4 | 3 | -5 | 906.58  | 12.57 |
| 4 | 3 | -5 | 1016.44 | 14.20 |
| 4 | 3 | -5 | 1002.11 | 13.97 |
| 4 | 3 | -5 | 919.26  | 11.70 |
| 4 | 3 | -5 | 949.29  | 12.64 |
| 4 | 3 | -5 | 991.89  | 13.31 |
| 4 | 3 | -5 | 962.06  | 13.61 |
| 4 | 3 | -4 | 101.36  | 2.87  |
| 4 | 3 | -4 | 104.12  | 3.97  |
| 4 | 3 | -4 | 102.68  | 3.36  |

## CIF 31

|   |   |    |         |       |
|---|---|----|---------|-------|
| 4 | 3 | -4 | 87.85   | 3.45  |
| 4 | 3 | -4 | 113.88  | 3.12  |
| 4 | 3 | -4 | 101.35  | 4.12  |
| 4 | 3 | -4 | 93.45   | 3.08  |
| 4 | 3 | -4 | 102.55  | 3.87  |
| 4 | 3 | -4 | 91.20   | 3.14  |
| 4 | 3 | -4 | 92.40   | 3.74  |
| 4 | 3 | -4 | 99.32   | 3.35  |
| 4 | 3 | -4 | 101.59  | 3.37  |
| 4 | 3 | -4 | 103.52  | 2.75  |
| 4 | 3 | -3 | 2694.07 | 29.43 |
| 4 | 3 | -3 | 2485.70 | 24.06 |
| 4 | 3 | -3 | 2844.06 | 29.67 |
| 4 | 3 | -3 | 2577.58 | 28.19 |
| 4 | 3 | -3 | 2717.92 | 27.25 |
| 4 | 3 | -3 | 2709.55 | 26.69 |
| 4 | 3 | -3 | 2787.22 | 26.83 |
| 4 | 3 | -3 | 2504.12 | 25.82 |
| 4 | 3 | -3 | 2524.68 | 27.88 |
| 4 | 3 | -3 | 3084.07 | 26.02 |
| 4 | 3 | -2 | 15.45   | 1.74  |
| 4 | 3 | -2 | 15.85   | 1.63  |
| 4 | 3 | -2 | 15.50   | 1.63  |
| 4 | 3 | -2 | 21.38   | 1.54  |
| 4 | 3 | -2 | 18.52   | 1.33  |
| 4 | 3 | -2 | 21.19   | 1.57  |
| 4 | 3 | -2 | 19.45   | 1.69  |
| 4 | 3 | -2 | 21.10   | 1.42  |
| 4 | 3 | -1 | 86.73   | 3.88  |
| 4 | 3 | -1 | 78.68   | 3.34  |
| 4 | 3 | -1 | 111.68  | 3.32  |
| 4 | 3 | -1 | 110.12  | 3.36  |
| 4 | 3 | -1 | 101.35  | 3.60  |
| 4 | 3 | -1 | 105.68  | 3.12  |
| 4 | 3 | 0  | 191.78  | 5.80  |
| 4 | 3 | 0  | 273.55  | 5.13  |
| 4 | 3 | 0  | 272.44  | 5.54  |
| 4 | 3 | 0  | 162.03  | 4.87  |
| 4 | 3 | 0  | 265.65  | 5.29  |
| 4 | 3 | 0  | 227.31  | 5.51  |
| 4 | 3 | 1  | 223.68  | 4.70  |



## CIF 31

|   |   |     |        |       |
|---|---|-----|--------|-------|
| 4 | 3 | 1   | 206.11 | 4.92  |
| 4 | 3 | 1   | 227.37 | 5.01  |
| 4 | 3 | 1   | 207.48 | 5.25  |
| 4 | 3 | 2   | 21.91  | 1.89  |
| 4 | 3 | 2   | 26.11  | 1.68  |
| 4 | 3 | 2   | 25.16  | 1.80  |
| 4 | 3 | 2   | 26.65  | 1.79  |
| 4 | 3 | 3   | 271.85 | 5.63  |
| 4 | 3 | 3   | 270.35 | 5.90  |
| 4 | 3 | 3   | 270.04 | 6.12  |
| 4 | 3 | 4   | 358.66 | 6.72  |
| 4 | 3 | 4   | 345.18 | 6.97  |
| 4 | 3 | 4   | 337.40 | 7.20  |
| 4 | 3 | 5   | 60.30  | 2.66  |
| 4 | 3 | 5   | 61.71  | 2.89  |
| 4 | 3 | 5   | 59.80  | 3.00  |
| 4 | 3 | 6   | 57.81  | 2.75  |
| 4 | 3 | 6   | 49.76  | 2.95  |
| 4 | 3 | 7   | 69.69  | 2.90  |
| 4 | 4 | -15 | 75.45  | 2.94  |
| 4 | 4 | -15 | 55.68  | 2.00  |
| 4 | 4 | -14 | 1.15   | 1.29  |
| 4 | 4 | -14 | 1.92   | 1.11  |
| 4 | 4 | -14 | 2.08   | 0.85  |
| 4 | 4 | -14 | 0.57   | 0.71  |
| 4 | 4 | -13 | 67.27  | 4.12  |
| 4 | 4 | -13 | 74.86  | 4.12  |
| 4 | 4 | -13 | 80.43  | 3.61  |
| 4 | 4 | -13 | 72.57  | 3.53  |
| 4 | 4 | -13 | 69.48  | 2.91  |
| 4 | 4 | -12 | 290.78 | 7.66  |
| 4 | 4 | -12 | 275.17 | 8.50  |
| 4 | 4 | -12 | 314.68 | 8.79  |
| 4 | 4 | -12 | 321.29 | 8.12  |
| 4 | 4 | -12 | 286.56 | 8.35  |
| 4 | 4 | -12 | 322.30 | 8.17  |
| 4 | 4 | -12 | 286.02 | 8.30  |
| 4 | 4 | -12 | 320.55 | 6.70  |
| 4 | 4 | -11 | 970.69 | 13.91 |
| 4 | 4 | -11 | 905.49 | 15.07 |
| 4 | 4 | -11 | 906.68 | 16.13 |

## CIF 31

|   |   |     |         |       |
|---|---|-----|---------|-------|
| 4 | 4 | -11 | 990.31  | 16.65 |
| 4 | 4 | -11 | 853.05  | 15.41 |
| 4 | 4 | -11 | 882.55  | 16.36 |
| 4 | 4 | -11 | 951.54  | 15.54 |
| 4 | 4 | -11 | 751.37  | 14.43 |
| 4 | 4 | -11 | 914.31  | 14.61 |
| 4 | 4 | -11 | 1010.36 | 13.30 |
| 4 | 4 | -10 | 109.30  | 4.16  |
| 4 | 4 | -10 | 97.62   | 4.55  |
| 4 | 4 | -10 | 90.13   | 4.60  |
| 4 | 4 | -10 | 88.19   | 4.99  |
| 4 | 4 | -10 | 89.48   | 4.42  |
| 4 | 4 | -10 | 86.29   | 4.24  |
| 4 | 4 | -10 | 91.19   | 3.94  |
| 4 | 4 | -10 | 123.62  | 4.71  |
| 4 | 4 | -10 | 85.18   | 4.58  |
| 4 | 4 | -10 | 90.01   | 4.27  |
| 4 | 4 | -10 | 113.63  | 3.82  |
| 4 | 4 | -9  | 125.08  | 4.44  |
| 4 | 4 | -9  | 125.14  | 5.03  |
| 4 | 4 | -9  | 108.50  | 4.86  |
| 4 | 4 | -9  | 141.55  | 6.12  |
| 4 | 4 | -9  | 127.25  | 4.32  |
| 4 | 4 | -9  | 131.73  | 5.26  |
| 4 | 4 | -9  | 114.78  | 4.57  |
| 4 | 4 | -9  | 120.45  | 4.57  |
| 4 | 4 | -9  | 140.42  | 4.94  |
| 4 | 4 | -9  | 108.63  | 4.99  |
| 4 | 4 | -9  | 119.00  | 4.90  |
| 4 | 4 | -8  | 117.16  | 4.21  |
| 4 | 4 | -8  | 117.11  | 4.20  |
| 4 | 4 | -8  | 115.70  | 4.73  |
| 4 | 4 | -8  | 105.83  | 4.55  |
| 4 | 4 | -8  | 134.23  | 5.85  |
| 4 | 4 | -8  | 114.85  | 4.25  |
| 4 | 4 | -8  | 123.65  | 4.99  |
| 4 | 4 | -8  | 118.34  | 4.77  |
| 4 | 4 | -8  | 116.39  | 4.58  |
| 4 | 4 | -8  | 105.70  | 4.04  |
| 4 | 4 | -8  | 114.05  | 4.37  |
| 4 | 4 | -8  | 122.01  | 4.90  |

## CIF 31

|   |   |    |         |       |
|---|---|----|---------|-------|
| 4 | 4 | -8 | 115.36  | 4.70  |
| 4 | 4 | -7 | 221.16  | 5.94  |
| 4 | 4 | -7 | 250.53  | 6.01  |
| 4 | 4 | -7 | 229.36  | 6.54  |
| 4 | 4 | -7 | 269.72  | 6.30  |
| 4 | 4 | -7 | 226.56  | 6.03  |
| 4 | 4 | -7 | 207.43  | 6.34  |
| 4 | 4 | -7 | 222.42  | 6.35  |
| 4 | 4 | -7 | 211.28  | 6.25  |
| 4 | 4 | -7 | 226.13  | 6.10  |
| 4 | 4 | -7 | 206.11  | 5.80  |
| 4 | 4 | -7 | 214.42  | 6.20  |
| 4 | 4 | -7 | 194.56  | 5.77  |
| 4 | 4 | -7 | 222.55  | 6.35  |
| 4 | 4 | -6 | 318.03  | 6.89  |
| 4 | 4 | -6 | 324.96  | 7.08  |
| 4 | 4 | -6 | 355.57  | 9.12  |
| 4 | 4 | -6 | 369.39  | 7.34  |
| 4 | 4 | -6 | 310.39  | 6.84  |
| 4 | 4 | -6 | 344.61  | 7.60  |
| 4 | 4 | -6 | 342.71  | 7.88  |
| 4 | 4 | -6 | 322.98  | 7.52  |
| 4 | 4 | -6 | 341.13  | 7.56  |
| 4 | 4 | -6 | 324.47  | 7.67  |
| 4 | 4 | -5 | 952.43  | 14.44 |
| 4 | 4 | -5 | 1088.11 | 13.74 |
| 4 | 4 | -5 | 928.90  | 13.76 |
| 4 | 4 | -5 | 965.45  | 11.94 |
| 4 | 4 | -5 | 886.05  | 12.57 |
| 4 | 4 | -5 | 969.77  | 14.70 |
| 4 | 4 | -5 | 1018.48 | 13.48 |
| 4 | 4 | -5 | 1038.76 | 14.77 |
| 4 | 4 | -5 | 976.45  | 14.41 |
| 4 | 4 | -5 | 1029.03 | 15.10 |
| 4 | 4 | -5 | 960.35  | 13.51 |
| 4 | 4 | -5 | 960.04  | 15.94 |
| 4 | 4 | -4 | 277.03  | 6.67  |
| 4 | 4 | -4 | 239.97  | 5.58  |
| 4 | 4 | -4 | 233.44  | 5.81  |
| 4 | 4 | -4 | 238.49  | 7.05  |
| 4 | 4 | -4 | 222.69  | 6.37  |

## CIF 31

|   |   |    |         |       |
|---|---|----|---------|-------|
| 4 | 4 | -4 | 268.61  | 6.51  |
| 4 | 4 | -4 | 238.07  | 5.45  |
| 4 | 4 | -4 | 248.56  | 5.67  |
| 4 | 4 | -4 | 234.12  | 6.19  |
| 4 | 4 | -4 | 226.25  | 4.48  |
| 4 | 4 | -3 | 1465.49 | 17.74 |
| 4 | 4 | -3 | 1366.25 | 16.24 |
| 4 | 4 | -3 | 1345.72 | 16.38 |
| 4 | 4 | -3 | 1117.31 | 17.70 |
| 4 | 4 | -3 | 1406.20 | 17.41 |
| 4 | 4 | -3 | 1360.99 | 18.11 |
| 4 | 4 | -3 | 1285.39 | 15.43 |
| 4 | 4 | -3 | 1325.46 | 16.19 |
| 4 | 4 | -3 | 1368.49 | 17.46 |
| 4 | 4 | -3 | 1237.32 | 15.46 |
| 4 | 4 | -3 | 1273.15 | 14.72 |
| 4 | 4 | -2 | 7.88    | 1.27  |
| 4 | 4 | -2 | 8.89    | 1.33  |
| 4 | 4 | -2 | 7.93    | 1.15  |
| 4 | 4 | -2 | 7.33    | 1.24  |
| 4 | 4 | -2 | 7.82    | 1.46  |
| 4 | 4 | -2 | 6.64    | 1.24  |
| 4 | 4 | -2 | 8.54    | 1.29  |
| 4 | 4 | -2 | 6.82    | 1.10  |
| 4 | 4 | -1 | 1650.87 | 19.63 |
| 4 | 4 | -1 | 1680.81 | 19.08 |
| 4 | 4 | -1 | 1477.81 | 19.86 |
| 4 | 4 | -1 | 1657.10 | 18.68 |
| 4 | 4 | -1 | 1541.66 | 19.25 |
| 4 | 4 | -1 | 1549.15 | 17.83 |
| 4 | 4 | 0  | 1279.08 | 15.22 |
| 4 | 4 | 0  | 1261.55 | 16.04 |
| 4 | 4 | 0  | 1140.75 | 16.62 |
| 4 | 4 | 0  | 1336.09 | 15.73 |
| 4 | 4 | 0  | 1142.44 | 15.62 |
| 4 | 4 | 1  | 44.57   | 2.30  |
| 4 | 4 | 1  | 35.89   | 2.47  |
| 4 | 4 | 1  | 40.94   | 2.34  |
| 4 | 4 | 1  | 35.16   | 2.16  |
| 4 | 4 | 2  | 768.79  | 11.02 |
| 4 | 4 | 2  | 760.54  | 11.42 |

## CIF 31

|   |   |     |        |       |
|---|---|-----|--------|-------|
| 4 | 4 | 3   | 797.13 | 11.44 |
| 4 | 4 | 3   | 766.25 | 12.14 |
| 4 | 4 | 3   | 770.40 | 11.70 |
| 4 | 4 | 4   | 5.61   | 1.07  |
| 4 | 4 | 4   | 5.21   | 1.13  |
| 4 | 4 | 4   | 5.60   | 1.13  |
| 4 | 4 | 5   | 91.31  | 3.34  |
| 4 | 4 | 5   | 92.58  | 3.59  |
| 4 | 4 | 6   | 95.59  | 3.49  |
| 4 | 4 | 7   | 23.43  | 2.01  |
| 4 | 5 | -15 | 1.31   | 0.75  |
| 4 | 5 | -15 | 0.80   | 0.42  |
| 4 | 5 | -14 | 5.33   | 1.37  |
| 4 | 5 | -14 | 5.25   | 1.01  |
| 4 | 5 | -14 | 5.55   | 1.11  |
| 4 | 5 | -14 | 4.29   | 0.81  |
| 4 | 5 | -13 | 163.48 | 5.83  |
| 4 | 5 | -13 | 199.63 | 6.43  |
| 4 | 5 | -13 | 189.64 | 5.44  |
| 4 | 5 | -13 | 152.26 | 5.19  |
| 4 | 5 | -13 | 167.83 | 4.23  |
| 4 | 5 | -12 | 153.12 | 5.61  |
| 4 | 5 | -12 | 191.96 | 6.15  |
| 4 | 5 | -12 | 176.72 | 6.34  |
| 4 | 5 | -12 | 175.75 | 5.94  |
| 4 | 5 | -12 | 174.20 | 5.52  |
| 4 | 5 | -12 | 161.44 | 4.39  |
| 4 | 5 | -12 | 197.86 | 6.81  |
| 4 | 5 | -11 | 18.62  | 1.78  |
| 4 | 5 | -11 | 20.04  | 2.22  |
| 4 | 5 | -11 | 18.42  | 2.30  |
| 4 | 5 | -11 | 20.61  | 2.69  |
| 4 | 5 | -11 | 21.91  | 2.41  |
| 4 | 5 | -11 | 15.28  | 2.19  |
| 4 | 5 | -11 | 17.37  | 1.86  |
| 4 | 5 | -11 | 17.68  | 2.28  |
| 4 | 5 | -11 | 19.51  | 2.15  |
| 4 | 5 | -11 | 16.79  | 1.57  |
| 4 | 5 | -10 | 119.61 | 4.35  |
| 4 | 5 | -10 | 128.93 | 5.30  |
| 4 | 5 | -10 | 125.80 | 5.40  |

## CIF 31

|   |   |     |        |      |
|---|---|-----|--------|------|
| 4 | 5 | -10 | 142.85 | 6.42 |
| 4 | 5 | -10 | 139.21 | 5.74 |
| 4 | 5 | -10 | 128.19 | 4.94 |
| 4 | 5 | -10 | 114.97 | 4.64 |
| 4 | 5 | -10 | 125.81 | 5.53 |
| 4 | 5 | -10 | 134.50 | 5.33 |
| 4 | 5 | -9  | 37.88  | 2.54 |
| 4 | 5 | -9  | 41.60  | 2.60 |
| 4 | 5 | -9  | 40.10  | 3.02 |
| 4 | 5 | -9  | 33.86  | 2.73 |
| 4 | 5 | -9  | 34.66  | 3.41 |
| 4 | 5 | -9  | 37.56  | 2.61 |
| 4 | 5 | -9  | 34.14  | 2.98 |
| 4 | 5 | -9  | 35.88  | 2.82 |
| 4 | 5 | -9  | 39.40  | 2.61 |
| 4 | 5 | -9  | 42.70  | 2.85 |
| 4 | 5 | -9  | 36.82  | 2.97 |
| 4 | 5 | -9  | 35.32  | 2.88 |
| 4 | 5 | -8  | 5.98   | 1.37 |
| 4 | 5 | -8  | 6.42   | 1.33 |
| 4 | 5 | -8  | 6.09   | 1.36 |
| 4 | 5 | -8  | 7.61   | 2.00 |
| 4 | 5 | -8  | 5.98   | 1.31 |
| 4 | 5 | -8  | 6.18   | 1.26 |
| 4 | 5 | -8  | 7.12   | 1.40 |
| 4 | 5 | -8  | 6.16   | 1.46 |
| 4 | 5 | -8  | 7.43   | 1.47 |
| 4 | 5 | -8  | 7.50   | 1.60 |
| 4 | 5 | -8  | 7.07   | 1.60 |
| 4 | 5 | -7  | 84.24  | 3.94 |
| 4 | 5 | -7  | 95.69  | 3.84 |
| 4 | 5 | -7  | 86.43  | 4.23 |
| 4 | 5 | -7  | 78.84  | 3.61 |
| 4 | 5 | -7  | 105.70 | 4.11 |
| 4 | 5 | -7  | 96.95  | 3.96 |
| 4 | 5 | -7  | 91.26  | 4.11 |
| 4 | 5 | -7  | 64.31  | 3.80 |
| 4 | 5 | -7  | 99.59  | 4.26 |
| 4 | 5 | -7  | 82.13  | 4.16 |
| 4 | 5 | -7  | 95.01  | 4.18 |
| 4 | 5 | -7  | 102.52 | 4.16 |

## CIF 31

|   |   |    |         |       |
|---|---|----|---------|-------|
| 4 | 5 | -7 | 89.98   | 4.07  |
| 4 | 5 | -7 | 84.74   | 4.23  |
| 4 | 5 | -6 | 965.17  | 15.06 |
| 4 | 5 | -6 | 984.57  | 15.32 |
| 4 | 5 | -6 | 1030.95 | 14.35 |
| 4 | 5 | -6 | 944.31  | 14.54 |
| 4 | 5 | -6 | 872.76  | 16.72 |
| 4 | 5 | -6 | 1080.16 | 15.64 |
| 4 | 5 | -6 | 964.50  | 14.10 |
| 4 | 5 | -6 | 1030.32 | 15.94 |
| 4 | 5 | -6 | 959.90  | 15.60 |
| 4 | 5 | -6 | 972.53  | 15.34 |
| 4 | 5 | -6 | 982.14  | 14.39 |
| 4 | 5 | -6 | 1022.54 | 14.79 |
| 4 | 5 | -6 | 967.38  | 13.76 |
| 4 | 5 | -5 | 9.21    | 1.50  |
| 4 | 5 | -5 | 11.86   | 1.58  |
| 4 | 5 | -5 | 11.41   | 1.18  |
| 4 | 5 | -5 | 6.58    | 1.68  |
| 4 | 5 | -5 | 8.68    | 1.58  |
| 4 | 5 | -5 | 13.86   | 1.67  |
| 4 | 5 | -5 | 11.28   | 1.56  |
| 4 | 5 | -5 | 9.22    | 1.74  |
| 4 | 5 | -5 | 8.04    | 1.73  |
| 4 | 5 | -5 | 8.57    | 1.25  |
| 4 | 5 | -5 | 6.77    | 1.54  |
| 4 | 5 | -4 | 39.64   | 2.64  |
| 4 | 5 | -4 | 39.49   | 2.48  |
| 4 | 5 | -4 | 35.38   | 2.31  |
| 4 | 5 | -4 | 33.07   | 2.61  |
| 4 | 5 | -4 | 34.10   | 2.73  |
| 4 | 5 | -4 | 30.23   | 1.99  |
| 4 | 5 | -4 | 36.67   | 2.69  |
| 4 | 5 | -3 | 157.97  | 5.07  |
| 4 | 5 | -3 | 184.72  | 5.17  |
| 4 | 5 | -3 | 152.12  | 5.28  |
| 4 | 5 | -3 | 155.46  | 4.58  |
| 4 | 5 | -3 | 174.76  | 5.86  |
| 4 | 5 | -3 | 197.14  | 5.18  |
| 4 | 5 | -3 | 159.43  | 5.35  |
| 4 | 5 | -2 | 1095.60 | 15.28 |

## CIF 31

|   |   |    |         |       |
|---|---|----|---------|-------|
| 4 | 5 | -2 | 1196.07 | 15.41 |
| 4 | 5 | -2 | 1102.06 | 15.80 |
| 4 | 5 | -2 | 1116.80 | 16.82 |
| 4 | 5 | -2 | 1177.42 | 17.05 |
| 4 | 5 | -2 | 1045.49 | 14.81 |
| 4 | 5 | -2 | 1146.22 | 16.09 |
| 4 | 5 | -2 | 1155.34 | 15.01 |
| 4 | 5 | -1 | 1.26    | 0.74  |
| 4 | 5 | -1 | 1.24    | 0.90  |
| 4 | 5 | -1 | 1.63    | 1.02  |
| 4 | 5 | -1 | 1.18    | 1.13  |
| 4 | 5 | -1 | 1.24    | 0.98  |
| 4 | 5 | -1 | 0.49    | 0.96  |
| 4 | 5 | -1 | 1.10    | 1.03  |
| 4 | 5 | -1 | 2.27    | 0.86  |
| 4 | 5 | 0  | 282.10  | 7.61  |
| 4 | 5 | 0  | 321.81  | 7.74  |
| 4 | 5 | 0  | 322.35  | 7.19  |
| 4 | 5 | 0  | 278.62  | 6.58  |
| 4 | 5 | 0  | 306.98  | 6.66  |
| 4 | 5 | 1  | 1305.09 | 16.14 |
| 4 | 5 | 1  | 1152.07 | 17.17 |
| 4 | 5 | 1  | 1109.60 | 16.37 |
| 4 | 5 | 1  | 1265.31 | 16.24 |
| 4 | 5 | 2  | 275.44  | 6.39  |
| 4 | 5 | 2  | 272.43  | 6.61  |
| 4 | 5 | 2  | 272.05  | 7.04  |
| 4 | 5 | 2  | 289.60  | 6.68  |
| 4 | 5 | 3  | 350.47  | 7.27  |
| 4 | 5 | 3  | 368.35  | 7.77  |
| 4 | 5 | 3  | 367.99  | 7.65  |
| 4 | 5 | 4  | 116.25  | 4.16  |
| 4 | 5 | 4  | 110.39  | 3.80  |
| 4 | 5 | 4  | 97.38   | 3.90  |
| 4 | 5 | 4  | 114.55  | 4.07  |
| 4 | 5 | 4  | 97.35   | 4.50  |
| 4 | 5 | 5  | 6.90    | 1.16  |
| 4 | 5 | 5  | 5.42    | 1.05  |
| 4 | 5 | 5  | 3.01    | 1.09  |
| 4 | 5 | 6  | 3.99    | 1.08  |
| 4 | 5 | 6  | 4.23    | 1.16  |



## CIF 31

|   |   |     |        |       |
|---|---|-----|--------|-------|
| 4 | 6 | -15 | 227.24 | 4.64  |
| 4 | 6 | -14 | 86.03  | 2.94  |
| 4 | 6 | -14 | 80.97  | 2.14  |
| 4 | 6 | -13 | 20.30  | 2.15  |
| 4 | 6 | -13 | 19.73  | 1.83  |
| 4 | 6 | -13 | 19.47  | 1.93  |
| 4 | 6 | -13 | 22.37  | 1.40  |
| 4 | 6 | -12 | 27.91  | 2.41  |
| 4 | 6 | -12 | 29.33  | 2.51  |
| 4 | 6 | -12 | 30.02  | 2.63  |
| 4 | 6 | -12 | 27.03  | 2.26  |
| 4 | 6 | -12 | 28.56  | 1.72  |
| 4 | 6 | -11 | 4.93   | 1.33  |
| 4 | 6 | -11 | 4.69   | 1.38  |
| 4 | 6 | -11 | 5.21   | 1.64  |
| 4 | 6 | -11 | 4.90   | 1.52  |
| 4 | 6 | -11 | 6.29   | 1.75  |
| 4 | 6 | -11 | 4.30   | 1.17  |
| 4 | 6 | -11 | 4.37   | 1.27  |
| 4 | 6 | -11 | 3.12   | 0.87  |
| 4 | 6 | -10 | 4.22   | 1.21  |
| 4 | 6 | -10 | 4.17   | 1.36  |
| 4 | 6 | -10 | 3.42   | 1.24  |
| 4 | 6 | -10 | 3.26   | 1.02  |
| 4 | 6 | -10 | 4.54   | 1.64  |
| 4 | 6 | -10 | 4.66   | 1.65  |
| 4 | 6 | -10 | 4.04   | 1.29  |
| 4 | 6 | -10 | 3.53   | 1.31  |
| 4 | 6 | -10 | 3.74   | 1.19  |
| 4 | 6 | -10 | 4.11   | 1.44  |
| 4 | 6 | -9  | 681.73 | 11.94 |
| 4 | 6 | -9  | 697.99 | 11.29 |
| 4 | 6 | -9  | 605.68 | 11.54 |
| 4 | 6 | -9  | 683.44 | 11.99 |
| 4 | 6 | -9  | 653.60 | 12.63 |
| 4 | 6 | -9  | 719.63 | 12.18 |
| 4 | 6 | -9  | 635.13 | 12.58 |
| 4 | 6 | -9  | 715.48 | 13.56 |
| 4 | 6 | -9  | 655.03 | 13.03 |
| 4 | 6 | -8  | 1.58   | 1.29  |
| 4 | 6 | -8  | 0.20   | 0.91  |

## CIF 31

|   |   |    |         |       |
|---|---|----|---------|-------|
| 4 | 6 | -8 | 0.68    | 1.10  |
| 4 | 6 | -8 | 0.67    | 0.91  |
| 4 | 6 | -8 | 2.25    | 1.07  |
| 4 | 6 | -8 | 6.85    | 1.60  |
| 4 | 6 | -8 | 0.45    | 1.22  |
| 4 | 6 | -8 | 5.20    | 1.41  |
| 4 | 6 | -8 | 1.42    | 1.31  |
| 4 | 6 | -8 | 0.52    | 0.96  |
| 4 | 6 | -8 | 0.83    | 1.03  |
| 4 | 6 | -8 | 2.34    | 1.33  |
| 4 | 6 | -7 | 195.16  | 6.27  |
| 4 | 6 | -7 | 206.71  | 5.76  |
| 4 | 6 | -7 | 194.01  | 6.46  |
| 4 | 6 | -7 | 186.03  | 5.87  |
| 4 | 6 | -7 | 206.08  | 6.12  |
| 4 | 6 | -7 | 189.88  | 5.92  |
| 4 | 6 | -7 | 201.80  | 6.36  |
| 4 | 6 | -7 | 198.22  | 6.65  |
| 4 | 6 | -7 | 171.95  | 6.32  |
| 4 | 6 | -7 | 203.83  | 6.48  |
| 4 | 6 | -7 | 195.08  | 5.95  |
| 4 | 6 | -7 | 174.07  | 5.84  |
| 4 | 6 | -6 | 996.52  | 15.75 |
| 4 | 6 | -6 | 911.57  | 15.29 |
| 4 | 6 | -6 | 1037.37 | 14.52 |
| 4 | 6 | -6 | 1000.35 | 15.53 |
| 4 | 6 | -6 | 997.75  | 15.96 |
| 4 | 6 | -6 | 925.42  | 14.30 |
| 4 | 6 | -6 | 966.17  | 15.73 |
| 4 | 6 | -6 | 979.57  | 16.18 |
| 4 | 6 | -6 | 977.53  | 15.90 |
| 4 | 6 | -6 | 1000.42 | 14.83 |
| 4 | 6 | -6 | 860.22  | 13.86 |
| 4 | 6 | -6 | 964.23  | 15.88 |
| 4 | 6 | -6 | 915.88  | 13.99 |
| 4 | 6 | -5 | 748.63  | 13.59 |
| 4 | 6 | -5 | 756.13  | 13.01 |
| 4 | 6 | -5 | 788.77  | 12.32 |
| 4 | 6 | -5 | 787.92  | 13.72 |
| 4 | 6 | -5 | 725.47  | 13.20 |
| 4 | 6 | -5 | 686.13  | 12.90 |

## CIF 31

|   |   |    |        |       |
|---|---|----|--------|-------|
| 4 | 6 | -5 | 767.55 | 12.40 |
| 4 | 6 | -5 | 779.62 | 14.00 |
| 4 | 6 | -5 | 848.65 | 13.14 |
| 4 | 6 | -5 | 734.16 | 13.37 |
| 4 | 6 | -5 | 731.38 | 12.66 |
| 4 | 6 | -4 | 498.04 | 9.98  |
| 4 | 6 | -4 | 521.97 | 9.66  |
| 4 | 6 | -4 | 554.41 | 10.75 |
| 4 | 6 | -4 | 535.07 | 9.88  |
| 4 | 6 | -4 | 526.77 | 11.13 |
| 4 | 6 | -4 | 509.77 | 11.08 |
| 4 | 6 | -4 | 557.44 | 10.16 |
| 4 | 6 | -4 | 489.38 | 10.47 |
| 4 | 6 | -4 | 501.07 | 10.59 |
| 4 | 6 | -3 | 3.60   | 1.06  |
| 4 | 6 | -3 | 1.27   | 0.98  |
| 4 | 6 | -3 | 1.89   | 1.10  |
| 4 | 6 | -3 | 1.06   | 1.35  |
| 4 | 6 | -3 | 2.05   | 1.22  |
| 4 | 6 | -3 | 2.02   | 1.11  |
| 4 | 6 | -3 | 1.24   | 1.08  |
| 4 | 6 | -3 | 1.71   | 1.21  |
| 4 | 6 | -2 | 8.09   | 1.25  |
| 4 | 6 | -2 | 12.27  | 1.63  |
| 4 | 6 | -2 | 9.74   | 1.49  |
| 4 | 6 | -2 | 10.92  | 1.71  |
| 4 | 6 | -2 | 9.84   | 1.83  |
| 4 | 6 | -2 | 9.10   | 1.42  |
| 4 | 6 | -2 | 12.37  | 1.58  |
| 4 | 6 | -1 | 22.98  | 2.11  |
| 4 | 6 | -1 | 23.50  | 2.19  |
| 4 | 6 | -1 | 24.24  | 2.46  |
| 4 | 6 | -1 | 22.94  | 2.03  |
| 4 | 6 | -1 | 20.17  | 1.89  |
| 4 | 6 | 0  | 14.08  | 1.73  |
| 4 | 6 | 0  | 13.35  | 1.69  |
| 4 | 6 | 0  | 15.08  | 1.97  |
| 4 | 6 | 0  | 14.32  | 1.74  |
| 4 | 6 | 0  | 15.43  | 2.31  |
| 4 | 6 | 0  | 16.32  | 1.70  |
| 4 | 6 | 1  | 324.95 | 7.35  |

## CIF 31

|   |   |     |        |      |
|---|---|-----|--------|------|
| 4 | 6 | 1   | 310.90 | 7.51 |
| 4 | 6 | 1   | 301.53 | 7.63 |
| 4 | 6 | 1   | 328.41 | 7.38 |
| 4 | 6 | 1   | 327.45 | 7.25 |
| 4 | 6 | 2   | 186.03 | 6.01 |
| 4 | 6 | 2   | 186.93 | 5.32 |
| 4 | 6 | 2   | 189.52 | 5.56 |
| 4 | 6 | 2   | 204.06 | 5.68 |
| 4 | 6 | 2   | 191.38 | 6.64 |
| 4 | 6 | 2   | 199.96 | 5.35 |
| 4 | 6 | 3   | 37.32  | 2.42 |
| 4 | 6 | 3   | 36.19  | 2.48 |
| 4 | 6 | 3   | 38.08  | 2.40 |
| 4 | 6 | 3   | 34.64  | 2.81 |
| 4 | 6 | 4   | 12.87  | 1.45 |
| 4 | 6 | 4   | 11.55  | 1.74 |
| 4 | 6 | 4   | 10.79  | 1.59 |
| 4 | 6 | 5   | 4.14   | 1.12 |
| 4 | 6 | 5   | 4.53   | 1.17 |
| 4 | 7 | -14 | 5.98   | 0.81 |
| 4 | 7 | -14 | 6.15   | 0.87 |
| 4 | 7 | -13 | 357.77 | 7.47 |
| 4 | 7 | -13 | 362.58 | 6.87 |
| 4 | 7 | -12 | 76.13  | 3.71 |
| 4 | 7 | -12 | 77.85  | 3.53 |
| 4 | 7 | -12 | 72.40  | 3.66 |
| 4 | 7 | -12 | 69.71  | 3.27 |
| 4 | 7 | -12 | 75.01  | 2.28 |
| 4 | 7 | -11 | 137.01 | 5.03 |
| 4 | 7 | -11 | 151.21 | 5.43 |
| 4 | 7 | -11 | 140.39 | 5.28 |
| 4 | 7 | -11 | 152.59 | 5.45 |
| 4 | 7 | -11 | 137.05 | 4.78 |
| 4 | 7 | -11 | 138.69 | 5.07 |
| 4 | 7 | -11 | 126.62 | 3.30 |
| 4 | 7 | -10 | 3.86   | 1.14 |
| 4 | 7 | -10 | 5.34   | 1.52 |
| 4 | 7 | -10 | 4.96   | 1.38 |
| 4 | 7 | -10 | 2.46   | 1.00 |
| 4 | 7 | -10 | 5.19   | 1.46 |
| 4 | 7 | -9  | 29.36  | 2.44 |

## CIF 31

|   |   |    |        |      |
|---|---|----|--------|------|
| 4 | 7 | -9 | 28.25  | 2.05 |
| 4 | 7 | -9 | 31.10  | 2.64 |
| 4 | 7 | -9 | 33.09  | 2.71 |
| 4 | 7 | -9 | 34.38  | 2.66 |
| 4 | 7 | -9 | 32.30  | 2.87 |
| 4 | 7 | -9 | 28.08  | 2.60 |
| 4 | 7 | -9 | 29.10  | 2.31 |
| 4 | 7 | -9 | 28.16  | 2.67 |
| 4 | 7 | -8 | 22.49  | 2.30 |
| 4 | 7 | -8 | 20.78  | 1.87 |
| 4 | 7 | -8 | 21.15  | 2.26 |
| 4 | 7 | -8 | 21.10  | 2.28 |
| 4 | 7 | -8 | 22.11  | 2.13 |
| 4 | 7 | -8 | 20.71  | 1.97 |
| 4 | 7 | -8 | 19.77  | 1.97 |
| 4 | 7 | -8 | 19.02  | 2.16 |
| 4 | 7 | -8 | 20.39  | 2.47 |
| 4 | 7 | -8 | 20.75  | 2.44 |
| 4 | 7 | -8 | 21.80  | 2.21 |
| 4 | 7 | -8 | 20.97  | 2.03 |
| 4 | 7 | -7 | 97.63  | 4.56 |
| 4 | 7 | -7 | 86.80  | 3.66 |
| 4 | 7 | -7 | 91.18  | 4.37 |
| 4 | 7 | -7 | 101.63 | 4.47 |
| 4 | 7 | -7 | 93.00  | 4.21 |
| 4 | 7 | -7 | 94.50  | 4.14 |
| 4 | 7 | -7 | 96.04  | 4.22 |
| 4 | 7 | -7 | 99.30  | 4.63 |
| 4 | 7 | -7 | 90.67  | 4.48 |
| 4 | 7 | -7 | 85.87  | 4.46 |
| 4 | 7 | -7 | 99.52  | 4.65 |
| 4 | 7 | -7 | 98.19  | 4.16 |
| 4 | 7 | -7 | 88.99  | 4.54 |
| 4 | 7 | -6 | 7.43   | 1.84 |
| 4 | 7 | -6 | 8.98   | 1.45 |
| 4 | 7 | -6 | 7.10   | 1.42 |
| 4 | 7 | -6 | 4.28   | 1.19 |
| 4 | 7 | -6 | 4.95   | 1.45 |
| 4 | 7 | -6 | 8.69   | 1.71 |
| 4 | 7 | -6 | 12.01  | 2.01 |
| 4 | 7 | -6 | 9.67   | 1.59 |

## CIF 31

|   |   |    |         |       |
|---|---|----|---------|-------|
| 4 | 7 | -6 | 5.85    | 1.51  |
| 4 | 7 | -6 | 12.18   | 2.02  |
| 4 | 7 | -6 | 8.92    | 1.55  |
| 4 | 7 | -6 | 6.32    | 1.62  |
| 4 | 7 | -5 | 0.43    | 1.31  |
| 4 | 7 | -5 | 1.53    | 0.95  |
| 4 | 7 | -5 | 1.04    | 0.95  |
| 4 | 7 | -5 | 2.27    | 1.10  |
| 4 | 7 | -5 | 0.62    | 1.26  |
| 4 | 7 | -5 | 2.24    | 1.31  |
| 4 | 7 | -5 | 1.60    | 1.40  |
| 4 | 7 | -5 | 0.19    | 1.23  |
| 4 | 7 | -5 | 0.91    | 1.01  |
| 4 | 7 | -5 | 1.53    | 1.16  |
| 4 | 7 | -5 | 0.49    | 0.96  |
| 4 | 7 | -4 | 671.84  | 11.78 |
| 4 | 7 | -4 | 776.38  | 12.21 |
| 4 | 7 | -4 | 772.59  | 13.99 |
| 4 | 7 | -4 | 737.52  | 13.51 |
| 4 | 7 | -4 | 676.09  | 12.06 |
| 4 | 7 | -4 | 762.17  | 12.47 |
| 4 | 7 | -4 | 710.82  | 13.38 |
| 4 | 7 | -4 | 813.12  | 12.83 |
| 4 | 7 | -4 | 707.55  | 13.04 |
| 4 | 7 | -4 | 740.17  | 13.27 |
| 4 | 7 | -3 | 56.34   | 3.69  |
| 4 | 7 | -3 | 54.29   | 2.98  |
| 4 | 7 | -3 | 57.98   | 3.73  |
| 4 | 7 | -3 | 55.68   | 3.58  |
| 4 | 7 | -3 | 54.11   | 2.98  |
| 4 | 7 | -3 | 53.65   | 3.42  |
| 4 | 7 | -3 | 59.56   | 3.68  |
| 4 | 7 | -3 | 54.79   | 3.05  |
| 4 | 7 | -3 | 54.46   | 3.16  |
| 4 | 7 | -3 | 55.20   | 3.27  |
| 4 | 7 | -3 | 59.21   | 3.72  |
| 4 | 7 | -2 | 1270.13 | 18.67 |
| 4 | 7 | -2 | 1305.57 | 17.09 |
| 4 | 7 | -2 | 1261.04 | 18.24 |
| 4 | 7 | -2 | 1195.56 | 17.69 |
| 4 | 7 | -2 | 1232.72 | 18.52 |

## CIF 31

|   |   |     |         |       |
|---|---|-----|---------|-------|
| 4 | 7 | -2  | 1202.31 | 16.90 |
| 4 | 7 | -2  | 1298.30 | 17.12 |
| 4 | 7 | -2  | 1102.10 | 16.30 |
| 4 | 7 | -2  | 1214.14 | 18.79 |
| 4 | 7 | -1  | 151.79  | 5.59  |
| 4 | 7 | -1  | 154.18  | 4.91  |
| 4 | 7 | -1  | 151.00  | 5.86  |
| 4 | 7 | -1  | 142.27  | 5.22  |
| 4 | 7 | -1  | 146.15  | 5.11  |
| 4 | 7 | -1  | 152.24  | 5.56  |
| 4 | 7 | -1  | 133.46  | 4.63  |
| 4 | 7 | -1  | 138.88  | 5.73  |
| 4 | 7 | 0   | 64.47   | 3.54  |
| 4 | 7 | 0   | 60.02   | 3.05  |
| 4 | 7 | 0   | 58.52   | 3.51  |
| 4 | 7 | 0   | 57.49   | 3.55  |
| 4 | 7 | 0   | 59.54   | 3.22  |
| 4 | 7 | 0   | 55.93   | 3.27  |
| 4 | 7 | 0   | 60.87   | 3.05  |
| 4 | 7 | 0   | 52.91   | 3.62  |
| 4 | 7 | 1   | 69.09   | 3.32  |
| 4 | 7 | 1   | 80.84   | 3.47  |
| 4 | 7 | 1   | 60.71   | 3.20  |
| 4 | 7 | 1   | 71.15   | 3.68  |
| 4 | 7 | 1   | 68.95   | 3.10  |
| 4 | 7 | 1   | 67.58   | 3.24  |
| 4 | 7 | 1   | 75.42   | 3.38  |
| 4 | 7 | 1   | 67.00   | 3.90  |
| 4 | 7 | 2   | 2.78    | 0.93  |
| 4 | 7 | 2   | 3.36    | 0.97  |
| 4 | 7 | 2   | 3.88    | 1.10  |
| 4 | 7 | 2   | 1.56    | 1.10  |
| 4 | 7 | 3   | 154.56  | 4.73  |
| 4 | 7 | 3   | 153.46  | 5.28  |
| 4 | 7 | 3   | 150.77  | 5.00  |
| 4 | 7 | 4   | 0.55    | 0.86  |
| 4 | 7 | 5   | 26.71   | 1.59  |
| 4 | 8 | -13 | 1.25    | 0.64  |
| 4 | 8 | -13 | 1.37    | 0.59  |
| 4 | 8 | -13 | 0.98    | 0.65  |
| 4 | 8 | -12 | 19.54   | 1.66  |

## CIF 31

|   |   |     |       |      |
|---|---|-----|-------|------|
| 4 | 8 | -12 | 23.12 | 1.81 |
| 4 | 8 | -11 | 46.66 | 2.66 |
| 4 | 8 | -11 | 47.28 | 2.82 |
| 4 | 8 | -11 | 42.67 | 2.74 |
| 4 | 8 | -11 | 45.52 | 2.51 |
| 4 | 8 | -11 | 47.85 | 2.72 |
| 4 | 8 | -10 | 6.25  | 1.33 |
| 4 | 8 | -10 | 6.95  | 1.10 |
| 4 | 8 | -10 | 9.15  | 1.64 |
| 4 | 8 | -10 | 8.28  | 1.42 |
| 4 | 8 | -10 | 8.89  | 1.50 |
| 4 | 8 | -9  | 92.53 | 3.83 |
| 4 | 8 | -9  | 81.66 | 3.70 |
| 4 | 8 | -9  | 90.74 | 3.85 |
| 4 | 8 | -9  | 92.83 | 4.20 |
| 4 | 8 | -9  | 88.06 | 4.08 |
| 4 | 8 | -8  | 65.81 | 3.48 |
| 4 | 8 | -8  | 55.97 | 3.19 |
| 4 | 8 | -8  | 49.81 | 2.80 |
| 4 | 8 | -8  | 55.01 | 2.90 |
| 4 | 8 | -8  | 56.98 | 3.36 |
| 4 | 8 | -8  | 61.46 | 3.05 |
| 4 | 8 | -8  | 55.08 | 3.31 |
| 4 | 8 | -8  | 55.99 | 3.49 |
| 4 | 8 | -8  | 58.40 | 3.47 |
| 4 | 8 | -7  | 9.46  | 1.82 |
| 4 | 8 | -7  | 7.47  | 1.40 |
| 4 | 8 | -7  | 5.72  | 1.40 |
| 4 | 8 | -7  | 6.88  | 1.78 |
| 4 | 8 | -7  | 9.03  | 1.52 |
| 4 | 8 | -7  | 9.46  | 1.69 |
| 4 | 8 | -7  | 7.44  | 1.58 |
| 4 | 8 | -7  | 7.80  | 1.34 |
| 4 | 8 | -7  | 6.60  | 1.52 |
| 4 | 8 | -6  | 0.73  | 1.29 |
| 4 | 8 | -6  | 2.90  | 0.99 |
| 4 | 8 | -6  | 2.19  | 0.91 |
| 4 | 8 | -6  | 1.37  | 0.94 |
| 4 | 8 | -6  | 0.27  | 1.23 |
| 4 | 8 | -6  | 0.25  | 1.40 |
| 4 | 8 | -6  | 2.68  | 1.31 |



## CIF 31

|   |   |    |        |      |
|---|---|----|--------|------|
| 4 | 8 | -6 | 1.40   | 1.34 |
| 4 | 8 | -6 | 2.08   | 1.14 |
| 4 | 8 | -6 | 1.51   | 1.29 |
| 4 | 8 | -6 | 3.00   | 1.30 |
| 4 | 8 | -6 | 0.66   | 0.94 |
| 4 | 8 | -6 | 1.42   | 1.07 |
| 4 | 8 | -5 | 98.27  | 3.79 |
| 4 | 8 | -5 | 108.74 | 4.73 |
| 4 | 8 | -5 | 114.83 | 4.77 |
| 4 | 8 | -5 | 114.54 | 4.32 |
| 4 | 8 | -5 | 99.16  | 4.01 |
| 4 | 8 | -5 | 95.38  | 4.48 |
| 4 | 8 | -5 | 105.10 | 4.18 |
| 4 | 8 | -5 | 95.90  | 4.34 |
| 4 | 8 | -5 | 93.48  | 4.15 |
| 4 | 8 | -4 | 11.12  | 2.01 |
| 4 | 8 | -4 | 13.90  | 1.60 |
| 4 | 8 | -4 | 13.45  | 2.12 |
| 4 | 8 | -4 | 16.00  | 2.20 |
| 4 | 8 | -4 | 13.51  | 1.90 |
| 4 | 8 | -4 | 13.96  | 1.67 |
| 4 | 8 | -4 | 12.62  | 1.87 |
| 4 | 8 | -4 | 15.04  | 2.08 |
| 4 | 8 | -4 | 12.60  | 1.64 |
| 4 | 8 | -4 | 10.40  | 1.55 |
| 4 | 8 | -4 | 9.97   | 1.65 |
| 4 | 8 | -3 | 191.88 | 6.19 |
| 4 | 8 | -3 | 177.87 | 5.15 |
| 4 | 8 | -3 | 207.09 | 6.77 |
| 4 | 8 | -3 | 193.76 | 6.59 |
| 4 | 8 | -3 | 190.56 | 6.38 |
| 4 | 8 | -3 | 192.32 | 6.03 |
| 4 | 8 | -3 | 175.25 | 5.67 |
| 4 | 8 | -3 | 200.09 | 6.32 |
| 4 | 8 | -3 | 184.70 | 5.50 |
| 4 | 8 | -3 | 179.55 | 5.73 |
| 4 | 8 | -3 | 181.90 | 6.17 |
| 4 | 8 | -2 | 30.21  | 2.58 |
| 4 | 8 | -2 | 28.41  | 2.12 |
| 4 | 8 | -2 | 28.20  | 2.64 |
| 4 | 8 | -2 | 31.43  | 2.72 |

## CIF 31

|   |   |     |        |      |
|---|---|-----|--------|------|
| 4 | 8 | -2  | 31.19  | 2.45 |
| 4 | 8 | -2  | 26.27  | 2.15 |
| 4 | 8 | -2  | 27.83  | 2.39 |
| 4 | 8 | -2  | 31.56  | 2.29 |
| 4 | 8 | -2  | 25.30  | 2.36 |
| 4 | 8 | -2  | 28.27  | 2.56 |
| 4 | 8 | -1  | 21.85  | 2.05 |
| 4 | 8 | -1  | 21.42  | 1.81 |
| 4 | 8 | -1  | 19.80  | 2.33 |
| 4 | 8 | -1  | 16.31  | 1.99 |
| 4 | 8 | -1  | 19.82  | 2.12 |
| 4 | 8 | -1  | 19.49  | 1.84 |
| 4 | 8 | -1  | 21.82  | 2.00 |
| 4 | 8 | -1  | 17.04  | 2.00 |
| 4 | 8 | -1  | 18.71  | 2.13 |
| 4 | 8 | 0   | 309.08 | 6.72 |
| 4 | 8 | 0   | 334.44 | 7.93 |
| 4 | 8 | 0   | 295.58 | 6.84 |
| 4 | 8 | 0   | 336.51 | 7.57 |
| 4 | 8 | 0   | 296.99 | 6.23 |
| 4 | 8 | 0   | 320.51 | 7.82 |
| 4 | 8 | 0   | 302.78 | 7.75 |
| 4 | 8 | 1   | 49.30  | 2.20 |
| 4 | 8 | 1   | 60.22  | 3.13 |
| 4 | 8 | 1   | 55.78  | 2.77 |
| 4 | 8 | 1   | 55.95  | 3.15 |
| 4 | 8 | 1   | 54.33  | 3.04 |
| 4 | 8 | 1   | 52.44  | 2.91 |
| 4 | 8 | 2   | 47.07  | 2.42 |
| 4 | 8 | 2   | 45.01  | 2.59 |
| 4 | 8 | 3   | 138.04 | 3.60 |
| 4 | 9 | -11 | 39.66  | 2.06 |
| 4 | 9 | -11 | 42.74  | 2.08 |
| 4 | 9 | -10 | 40.56  | 2.24 |
| 4 | 9 | -9  | 65.59  | 2.82 |
| 4 | 9 | -9  | 65.11  | 2.92 |
| 4 | 9 | -9  | 58.62  | 2.92 |
| 4 | 9 | -9  | 63.84  | 3.07 |
| 4 | 9 | -8  | 57.87  | 2.87 |
| 4 | 9 | -8  | 48.26  | 2.74 |
| 4 | 9 | -8  | 52.66  | 2.41 |

## CIF 31

|   |   |    |        |      |
|---|---|----|--------|------|
| 4 | 9 | -8 | 44.39  | 2.48 |
| 4 | 9 | -8 | 51.61  | 2.83 |
| 4 | 9 | -7 | 104.87 | 4.01 |
| 4 | 9 | -7 | 97.05  | 3.64 |
| 4 | 9 | -7 | 105.67 | 4.23 |
| 4 | 9 | -7 | 100.90 | 3.68 |
| 4 | 9 | -7 | 97.20  | 3.45 |
| 4 | 9 | -7 | 100.85 | 4.09 |
| 4 | 9 | -7 | 91.55  | 3.78 |
| 4 | 9 | -6 | 23.88  | 2.14 |
| 4 | 9 | -6 | 27.10  | 2.21 |
| 4 | 9 | -6 | 24.84  | 2.35 |
| 4 | 9 | -6 | 24.97  | 2.08 |
| 4 | 9 | -6 | 23.39  | 2.07 |
| 4 | 9 | -6 | 22.58  | 1.92 |
| 4 | 9 | -5 | 330.38 | 6.72 |
| 4 | 9 | -5 | 330.05 | 7.60 |
| 4 | 9 | -4 | 235.20 | 6.07 |
| 4 | 9 | -4 | 196.07 | 5.83 |
| 4 | 9 | -4 | 208.41 | 6.10 |
| 4 | 9 | -4 | 227.96 | 6.18 |
| 4 | 9 | -4 | 217.17 | 5.77 |
| 4 | 9 | -4 | 180.79 | 5.11 |
| 4 | 9 | -4 | 180.24 | 5.18 |
| 4 | 9 | -4 | 190.86 | 5.31 |
| 4 | 9 | -3 | 199.59 | 5.40 |
| 4 | 9 | -3 | 186.44 | 5.32 |
| 4 | 9 | -3 | 196.35 | 5.76 |
| 4 | 9 | -3 | 194.13 | 5.43 |
| 4 | 9 | -2 | 18.23  | 1.63 |
| 4 | 9 | -2 | 17.76  | 1.82 |
| 4 | 9 | -2 | 20.62  | 1.88 |
| 4 | 9 | -2 | 19.47  | 1.85 |
| 4 | 9 | -2 | 16.91  | 1.71 |
| 4 | 9 | -1 | 46.81  | 2.18 |
| 4 | 9 | -1 | 46.59  | 2.66 |
| 4 | 9 | -1 | 41.17  | 2.27 |
| 4 | 9 | -1 | 52.01  | 2.58 |
| 4 | 9 | -1 | 49.76  | 2.66 |
| 4 | 9 | 0  | 5.71   | 1.08 |
| 4 | 9 | 0  | 5.25   | 0.91 |

## CIF 31

|   |     |    |        |      |
|---|-----|----|--------|------|
| 4 | 9   | 1  | 25.06  | 1.58 |
| 4 | 9   | 1  | 24.67  | 1.58 |
| 4 | 9   | 1  | 22.25  | 1.40 |
| 4 | 10  | -9 | 47.85  | 1.90 |
| 4 | 10  | -8 | 20.79  | 1.46 |
| 4 | 10  | -8 | 27.51  | 1.58 |
| 4 | 10  | -7 | 1.04   | 0.54 |
| 4 | 10  | -7 | 0.29   | 0.73 |
| 4 | 10  | -6 | 179.79 | 4.57 |
| 4 | 10  | -6 | 173.26 | 4.06 |
| 4 | 10  | -5 | 38.50  | 1.99 |
| 4 | 10  | -5 | 41.06  | 2.10 |
| 4 | 10  | -5 | 39.59  | 1.99 |
| 4 | 10  | -4 | 136.67 | 3.79 |
| 4 | 10  | -4 | 137.34 | 3.82 |
| 4 | 10  | -4 | 134.72 | 3.64 |
| 4 | 10  | -3 | 139.47 | 3.35 |
| 4 | 10  | -3 | 128.69 | 3.45 |
| 4 | 10  | -2 | 5.72   | 0.81 |
| 4 | 10  | -2 | 5.35   | 0.91 |
| 5 | -13 | -1 | 2.58   | 0.53 |
| 5 | -13 | -1 | 2.17   | 0.38 |
| 5 | -13 | 0  | 28.68  | 1.42 |
| 5 | -13 | 0  | 29.06  | 1.21 |
| 5 | -13 | 1  | 6.69   | 0.84 |
| 5 | -13 | 1  | 6.32   | 0.74 |
| 5 | -13 | 1  | 5.96   | 0.73 |
| 5 | -13 | 2  | 0.79   | 0.58 |
| 5 | -13 | 2  | 2.20   | 0.60 |
| 5 | -13 | 3  | 22.89  | 1.22 |
| 5 | -13 | 4  | 173.12 | 3.19 |
| 5 | -13 | 5  | 33.70  | 1.37 |
| 5 | -13 | 5  | 36.87  | 1.21 |
| 5 | -12 | -4 | 19.38  | 0.88 |
| 5 | -12 | -4 | 22.99  | 1.33 |
| 5 | -12 | -4 | 21.08  | 1.16 |
| 5 | -12 | -3 | 36.93  | 1.33 |
| 5 | -12 | -3 | 40.02  | 1.97 |
| 5 | -12 | -3 | 40.78  | 1.83 |
| 5 | -12 | -2 | 20.04  | 1.03 |
| 5 | -12 | -2 | 22.75  | 1.63 |

## CIF 31

|   |     |    |        |      |
|---|-----|----|--------|------|
| 5 | -12 | -2 | 21.05  | 1.51 |
| 5 | -12 | -2 | 20.20  | 1.48 |
| 5 | -12 | -2 | 22.42  | 1.23 |
| 5 | -12 | -1 | 4.93   | 1.00 |
| 5 | -12 | -1 | 6.01   | 1.03 |
| 5 | -12 | -1 | 5.47   | 0.96 |
| 5 | -12 | -1 | 3.06   | 0.77 |
| 5 | -12 | 0  | 11.09  | 1.40 |
| 5 | -12 | 0  | 12.77  | 1.32 |
| 5 | -12 | 0  | 12.54  | 1.22 |
| 5 | -12 | 1  | 35.72  | 2.13 |
| 5 | -12 | 1  | 37.02  | 2.12 |
| 5 | -12 | 2  | 159.54 | 4.32 |
| 5 | -12 | 2  | 157.13 | 3.91 |
| 5 | -12 | 2  | 158.89 | 4.28 |
| 5 | -12 | 3  | 5.75   | 1.08 |
| 5 | -12 | 3  | 5.94   | 0.99 |
| 5 | -12 | 3  | 7.79   | 1.16 |
| 5 | -12 | 3  | 6.12   | 1.02 |
| 5 | -12 | 4  | 89.52  | 3.13 |
| 5 | -12 | 4  | 87.20  | 2.84 |
| 5 | -12 | 4  | 72.60  | 2.92 |
| 5 | -12 | 4  | 77.87  | 2.87 |
| 5 | -12 | 4  | 100.91 | 2.98 |
| 5 | -12 | 5  | 351.08 | 5.93 |
| 5 | -12 | 5  | 339.50 | 5.88 |
| 5 | -12 | 5  | 341.06 | 6.45 |
| 5 | -12 | 5  | 353.27 | 5.70 |
| 5 | -12 | 5  | 330.25 | 5.99 |
| 5 | -12 | 6  | 2.54   | 0.81 |
| 5 | -12 | 6  | 2.71   | 0.74 |
| 5 | -12 | 6  | 3.15   | 0.79 |
| 5 | -12 | 6  | 3.29   | 0.69 |
| 5 | -12 | 6  | 1.41   | 0.68 |
| 5 | -12 | 6  | 4.06   | 0.61 |
| 5 | -12 | 6  | 1.70   | 0.68 |
| 5 | -12 | 7  | 3.55   | 0.75 |
| 5 | -12 | 7  | 3.32   | 0.71 |
| 5 | -12 | 7  | 2.70   | 0.66 |
| 5 | -12 | 7  | 2.78   | 0.67 |
| 5 | -12 | 7  | 3.41   | 0.59 |

## CIF 31

|   |     |    |        |      |
|---|-----|----|--------|------|
| 5 | -12 | 8  | 13.25  | 0.97 |
| 5 | -12 | 8  | 10.39  | 0.74 |
| 5 | -11 | -6 | 216.04 | 3.84 |
| 5 | -11 | -5 | 121.94 | 3.10 |
| 5 | -11 | -5 | 111.24 | 3.40 |
| 5 | -11 | -5 | 119.48 | 3.53 |
| 5 | -11 | -4 | 54.40  | 2.70 |
| 5 | -11 | -4 | 60.94  | 2.71 |
| 5 | -11 | -4 | 57.03  | 2.64 |
| 5 | -11 | -3 | 17.60  | 1.73 |
| 5 | -11 | -3 | 17.90  | 1.68 |
| 5 | -11 | -3 | 17.70  | 1.74 |
| 5 | -11 | -3 | 15.91  | 1.56 |
| 5 | -11 | -3 | 18.45  | 1.33 |
| 5 | -11 | -2 | 37.57  | 2.44 |
| 5 | -11 | -2 | 34.05  | 2.32 |
| 5 | -11 | -2 | 35.35  | 2.45 |
| 5 | -11 | -2 | 35.57  | 2.31 |
| 5 | -11 | -2 | 35.31  | 1.96 |
| 5 | -11 | -1 | 13.33  | 1.57 |
| 5 | -11 | -1 | 12.45  | 1.25 |
| 5 | -11 | -1 | 14.96  | 1.47 |
| 5 | -11 | 0  | 9.85   | 1.48 |
| 5 | -11 | 0  | 11.33  | 1.42 |
| 5 | -11 | 0  | 10.50  | 1.50 |
| 5 | -11 | 0  | 9.82   | 1.21 |
| 5 | -11 | 0  | 10.53  | 1.40 |
| 5 | -11 | 0  | 11.12  | 1.25 |
| 5 | -11 | 0  | 13.34  | 1.56 |
| 5 | -11 | 1  | 301.58 | 6.87 |
| 5 | -11 | 1  | 279.00 | 6.30 |
| 5 | -11 | 1  | 306.76 | 7.07 |
| 5 | -11 | 1  | 259.79 | 5.99 |
| 5 | -11 | 1  | 284.26 | 6.57 |
| 5 | -11 | 1  | 263.11 | 5.81 |
| 5 | -11 | 1  | 278.36 | 6.24 |
| 5 | -11 | 2  | 10.36  | 1.54 |
| 5 | -11 | 2  | 10.57  | 1.44 |
| 5 | -11 | 2  | 10.12  | 1.37 |
| 5 | -11 | 2  | 9.64   | 1.44 |
| 5 | -11 | 2  | 10.90  | 1.34 |

## CIF 31

|       |   |        |       |
|-------|---|--------|-------|
| 5 -11 | 2 | 12.30  | 1.58  |
| 5 -11 | 2 | 9.38   | 1.34  |
| 5 -11 | 3 | 0.76   | 0.75  |
| 5 -11 | 3 | 0.83   | 1.05  |
| 5 -11 | 3 | 0.81   | 0.96  |
| 5 -11 | 3 | 1.88   | 1.02  |
| 5 -11 | 3 | 0.71   | 1.08  |
| 5 -11 | 3 | 0.99   | 0.97  |
| 5 -11 | 3 | 0.57   | 0.77  |
| 5 -11 | 3 | 0.44   | 0.88  |
| 5 -11 | 3 | 0.62   | 0.75  |
| 5 -11 | 3 | 0.67   | 0.91  |
| 5 -11 | 3 | 1.27   | 1.05  |
| 5 -11 | 4 | 886.06 | 12.88 |
| 5 -11 | 4 | 883.38 | 12.58 |
| 5 -11 | 4 | 844.55 | 12.18 |
| 5 -11 | 4 | 903.20 | 12.83 |
| 5 -11 | 4 | 865.82 | 12.30 |
| 5 -11 | 4 | 761.47 | 12.37 |
| 5 -11 | 4 | 790.15 | 12.04 |
| 5 -11 | 4 | 841.87 | 12.24 |
| 5 -11 | 4 | 912.20 | 12.03 |
| 5 -11 | 5 | 7.77   | 1.41  |
| 5 -11 | 5 | 7.87   | 1.29  |
| 5 -11 | 5 | 7.60   | 1.52  |
| 5 -11 | 5 | 7.71   | 1.27  |
| 5 -11 | 5 | 7.48   | 1.22  |
| 5 -11 | 5 | 5.89   | 1.16  |
| 5 -11 | 5 | 5.53   | 1.06  |
| 5 -11 | 5 | 6.34   | 1.15  |
| 5 -11 | 5 | 7.90   | 1.08  |
| 5 -11 | 6 | 293.44 | 6.36  |
| 5 -11 | 6 | 277.46 | 5.98  |
| 5 -11 | 6 | 280.89 | 6.05  |
| 5 -11 | 6 | 293.04 | 6.28  |
| 5 -11 | 6 | 288.34 | 6.09  |
| 5 -11 | 6 | 272.32 | 6.12  |
| 5 -11 | 6 | 279.25 | 5.80  |
| 5 -11 | 6 | 284.19 | 5.19  |
| 5 -11 | 7 | 34.77  | 2.00  |
| 5 -11 | 7 | 31.73  | 1.95  |

## CIF 31

|   |     |    |        |      |
|---|-----|----|--------|------|
| 5 | -11 | 7  | 31.09  | 1.91 |
| 5 | -11 | 7  | 29.77  | 1.95 |
| 5 | -11 | 7  | 30.91  | 1.96 |
| 5 | -11 | 7  | 30.65  | 1.77 |
| 5 | -11 | 8  | 299.47 | 5.36 |
| 5 | -11 | 8  | 298.79 | 5.60 |
| 5 | -11 | 8  | 275.04 | 5.34 |
| 5 | -11 | 8  | 251.70 | 5.27 |
| 5 | -11 | 8  | 254.89 | 4.60 |
| 5 | -11 | 9  | 0.60   | 0.64 |
| 5 | -11 | 9  | 1.09   | 0.56 |
| 5 | -11 | 9  | 0.19   | 0.53 |
| 5 | -11 | 9  | 0.63   | 0.49 |
| 5 | -10 | -8 | 58.78  | 1.89 |
| 5 | -10 | -7 | 71.24  | 2.76 |
| 5 | -10 | -6 | 46.27  | 2.61 |
| 5 | -10 | -6 | 46.37  | 2.50 |
| 5 | -10 | -6 | 43.65  | 2.50 |
| 5 | -10 | -6 | 44.71  | 2.48 |
| 5 | -10 | -6 | 45.02  | 2.27 |
| 5 | -10 | -5 | 108.71 | 4.10 |
| 5 | -10 | -5 | 112.73 | 4.13 |
| 5 | -10 | -5 | 107.35 | 4.08 |
| 5 | -10 | -5 | 105.81 | 3.97 |
| 5 | -10 | -5 | 117.91 | 3.82 |
| 5 | -10 | -5 | 99.81  | 3.16 |
| 5 | -10 | -4 | 1.64   | 0.69 |
| 5 | -10 | -4 | 1.79   | 1.01 |
| 5 | -10 | -4 | 1.47   | 0.97 |
| 5 | -10 | -4 | 1.97   | 1.09 |
| 5 | -10 | -4 | 0.82   | 0.78 |
| 5 | -10 | -4 | 1.49   | 0.85 |
| 5 | -10 | -3 | 6.12   | 1.35 |
| 5 | -10 | -3 | 7.84   | 1.47 |
| 5 | -10 | -3 | 6.40   | 1.45 |
| 5 | -10 | -3 | 5.12   | 1.27 |
| 5 | -10 | -3 | 5.24   | 1.04 |
| 5 | -10 | -3 | 2.85   | 0.89 |
| 5 | -10 | -3 | 3.13   | 0.93 |
| 5 | -10 | -3 | 5.69   | 1.10 |
| 5 | -10 | -3 | 5.22   | 1.15 |



## CIF 31

|   |     |    |        |      |
|---|-----|----|--------|------|
| 5 | -10 | -2 | 3.75   | 1.03 |
| 5 | -10 | -2 | 3.08   | 1.16 |
| 5 | -10 | -2 | 3.57   | 1.02 |
| 5 | -10 | -2 | 2.33   | 0.85 |
| 5 | -10 | -2 | 3.46   | 0.98 |
| 5 | -10 | -2 | 3.89   | 1.03 |
| 5 | -10 | -1 | 12.80  | 1.82 |
| 5 | -10 | -1 | 12.46  | 1.65 |
| 5 | -10 | -1 | 13.24  | 1.70 |
| 5 | -10 | -1 | 12.78  | 1.51 |
| 5 | -10 | -1 | 11.99  | 1.47 |
| 5 | -10 | -1 | 12.28  | 1.64 |
| 5 | -10 | -1 | 12.25  | 1.33 |
| 5 | -10 | -1 | 13.17  | 1.49 |
| 5 | -10 | -1 | 12.11  | 1.35 |
| 5 | -10 | -1 | 11.09  | 1.49 |
| 5 | -10 | 0  | 123.58 | 4.61 |
| 5 | -10 | 0  | 117.19 | 4.31 |
| 5 | -10 | 0  | 125.60 | 4.73 |
| 5 | -10 | 0  | 117.77 | 4.25 |
| 5 | -10 | 0  | 113.04 | 4.44 |
| 5 | -10 | 0  | 123.90 | 4.43 |
| 5 | -10 | 0  | 112.23 | 3.91 |
| 5 | -10 | 0  | 123.37 | 4.20 |
| 5 | -10 | 0  | 112.03 | 4.03 |
| 5 | -10 | 1  | 17.33  | 1.78 |
| 5 | -10 | 1  | 17.38  | 1.99 |
| 5 | -10 | 1  | 18.92  | 1.98 |
| 5 | -10 | 1  | 16.42  | 1.75 |
| 5 | -10 | 1  | 20.06  | 2.04 |
| 5 | -10 | 1  | 13.91  | 1.70 |
| 5 | -10 | 1  | 18.37  | 1.91 |
| 5 | -10 | 1  | 15.33  | 1.74 |
| 5 | -10 | 1  | 15.30  | 1.51 |
| 5 | -10 | 1  | 16.43  | 1.89 |
| 5 | -10 | 1  | 16.86  | 1.76 |
| 5 | -10 | 2  | 292.76 | 7.11 |
| 5 | -10 | 2  | 293.94 | 7.32 |
| 5 | -10 | 2  | 302.36 | 7.10 |
| 5 | -10 | 2  | 317.51 | 7.27 |
| 5 | -10 | 2  | 324.47 | 7.50 |

## CIF 31

|   |     |   |        |      |
|---|-----|---|--------|------|
| 5 | -10 | 2 | 299.91 | 7.16 |
| 5 | -10 | 2 | 287.46 | 7.02 |
| 5 | -10 | 2 | 269.33 | 6.32 |
| 5 | -10 | 2 | 304.16 | 7.69 |
| 5 | -10 | 2 | 320.36 | 7.30 |
| 5 | -10 | 2 | 288.98 | 6.71 |
| 5 | -10 | 3 | 84.32  | 4.09 |
| 5 | -10 | 3 | 95.89  | 4.10 |
| 5 | -10 | 3 | 98.80  | 3.96 |
| 5 | -10 | 3 | 93.31  | 3.97 |
| 5 | -10 | 3 | 94.24  | 4.01 |
| 5 | -10 | 3 | 89.03  | 3.83 |
| 5 | -10 | 3 | 92.72  | 4.01 |
| 5 | -10 | 3 | 102.45 | 4.17 |
| 5 | -10 | 3 | 91.45  | 3.63 |
| 5 | -10 | 3 | 85.65  | 4.00 |
| 5 | -10 | 3 | 101.98 | 3.96 |
| 5 | -10 | 3 | 84.91  | 3.46 |
| 5 | -10 | 4 | 14.81  | 2.27 |
| 5 | -10 | 4 | 18.16  | 1.82 |
| 5 | -10 | 4 | 16.66  | 1.72 |
| 5 | -10 | 4 | 17.68  | 1.91 |
| 5 | -10 | 4 | 19.34  | 1.95 |
| 5 | -10 | 4 | 20.54  | 2.00 |
| 5 | -10 | 4 | 20.07  | 1.90 |
| 5 | -10 | 4 | 16.85  | 1.64 |
| 5 | -10 | 4 | 16.08  | 3.84 |
| 5 | -10 | 5 | 11.07  | 1.98 |
| 5 | -10 | 5 | 11.99  | 1.61 |
| 5 | -10 | 5 | 13.00  | 1.53 |
| 5 | -10 | 5 | 11.07  | 1.64 |
| 5 | -10 | 5 | 12.12  | 1.63 |
| 5 | -10 | 5 | 11.58  | 1.61 |
| 5 | -10 | 5 | 13.19  | 1.66 |
| 5 | -10 | 5 | 11.43  | 1.49 |
| 5 | -10 | 5 | 15.04  | 1.44 |
| 5 | -10 | 5 | 13.03  | 3.99 |
| 5 | -10 | 5 | 10.12  | 1.36 |
| 5 | -10 | 6 | 48.87  | 3.16 |
| 5 | -10 | 6 | 51.94  | 2.80 |
| 5 | -10 | 6 | 53.52  | 2.64 |

## CIF 31

|   |     |    |        |      |
|---|-----|----|--------|------|
| 5 | -10 | 6  | 53.12  | 2.87 |
| 5 | -10 | 6  | 48.65  | 2.86 |
| 5 | -10 | 6  | 54.85  | 2.71 |
| 5 | -10 | 6  | 62.68  | 2.48 |
| 5 | -10 | 6  | 51.67  | 4.71 |
| 5 | -10 | 7  | 302.19 | 6.41 |
| 5 | -10 | 7  | 292.06 | 5.98 |
| 5 | -10 | 7  | 277.62 | 6.65 |
| 5 | -10 | 7  | 274.82 | 5.86 |
| 5 | -10 | 8  | 4.25   | 1.03 |
| 5 | -10 | 8  | 3.64   | 0.84 |
| 5 | -10 | 8  | 3.56   | 1.04 |
| 5 | -10 | 8  | 4.27   | 1.07 |
| 5 | -10 | 8  | 3.97   | 0.85 |
| 5 | -10 | 9  | 6.15   | 0.96 |
| 5 | -10 | 9  | 6.14   | 0.82 |
| 5 | -10 | 9  | 5.75   | 1.01 |
| 5 | -10 | 9  | 5.13   | 1.00 |
| 5 | -10 | 9  | 4.09   | 0.68 |
| 5 | -10 | 10 | 82.83  | 2.33 |
| 5 | -10 | 10 | 84.17  | 2.59 |
| 5 | -10 | 10 | 85.72  | 2.63 |
| 5 | -9  | -9 | 76.17  | 2.31 |
| 5 | -9  | -9 | 73.94  | 2.38 |
| 5 | -9  | -8 | 71.55  | 2.18 |
| 5 | -9  | -8 | 79.87  | 2.83 |
| 5 | -9  | -7 | 251.24 | 4.67 |
| 5 | -9  | -7 | 257.81 | 6.43 |
| 5 | -9  | -6 | 40.71  | 1.85 |
| 5 | -9  | -6 | 33.09  | 2.45 |
| 5 | -9  | -6 | 35.03  | 2.62 |
| 5 | -9  | -6 | 33.16  | 2.49 |
| 5 | -9  | -6 | 33.35  | 2.43 |
| 5 | -9  | -6 | 32.06  | 2.14 |
| 5 | -9  | -6 | 35.74  | 2.20 |
| 5 | -9  | -6 | 36.80  | 2.35 |
| 5 | -9  | -5 | 34.68  | 2.58 |
| 5 | -9  | -5 | 37.78  | 2.71 |
| 5 | -9  | -5 | 30.53  | 2.49 |
| 5 | -9  | -5 | 35.66  | 2.59 |
| 5 | -9  | -5 | 37.99  | 2.40 |

## CIF 31

|   |    |    |        |       |
|---|----|----|--------|-------|
| 5 | -9 | -5 | 27.51  | 2.08  |
| 5 | -9 | -5 | 35.03  | 2.30  |
| 5 | -9 | -5 | 34.33  | 2.27  |
| 5 | -9 | -5 | 31.70  | 1.78  |
| 5 | -9 | -4 | 184.47 | 5.85  |
| 5 | -9 | -4 | 192.75 | 5.98  |
| 5 | -9 | -4 | 175.08 | 5.69  |
| 5 | -9 | -4 | 181.02 | 5.68  |
| 5 | -9 | -4 | 175.86 | 5.23  |
| 5 | -9 | -4 | 154.46 | 4.76  |
| 5 | -9 | -4 | 171.71 | 5.04  |
| 5 | -9 | -4 | 164.21 | 4.85  |
| 5 | -9 | -4 | 138.36 | 4.14  |
| 5 | -9 | -3 | 707.67 | 11.58 |
| 5 | -9 | -3 | 710.11 | 11.03 |
| 5 | -9 | -3 | 722.06 | 11.44 |
| 5 | -9 | -3 | 690.77 | 10.79 |
| 5 | -9 | -3 | 696.76 | 10.76 |
| 5 | -9 | -2 | 2.69   | 1.30  |
| 5 | -9 | -2 | 2.03   | 0.93  |
| 5 | -9 | -2 | 4.86   | 1.00  |
| 5 | -9 | -2 | 3.55   | 1.27  |
| 5 | -9 | -2 | 6.46   | 1.45  |
| 5 | -9 | -2 | 5.83   | 1.20  |
| 5 | -9 | -2 | 5.20   | 1.27  |
| 5 | -9 | -2 | 8.15   | 1.36  |
| 5 | -9 | -2 | 3.30   | 0.94  |
| 5 | -9 | -2 | 3.10   | 1.01  |
| 5 | -9 | -1 | 699.83 | 11.85 |
| 5 | -9 | -1 | 688.04 | 10.76 |
| 5 | -9 | -1 | 701.50 | 10.86 |
| 5 | -9 | -1 | 708.64 | 11.61 |
| 5 | -9 | -1 | 725.46 | 12.15 |
| 5 | -9 | -1 | 668.47 | 11.39 |
| 5 | -9 | -1 | 654.67 | 10.52 |
| 5 | -9 | -1 | 658.40 | 11.40 |
| 5 | -9 | -1 | 724.55 | 11.76 |
| 5 | -9 | -1 | 648.10 | 10.53 |
| 5 | -9 | -1 | 671.60 | 10.34 |
| 5 | -9 | -1 | 721.56 | 11.52 |
| 5 | -9 | -1 | 689.58 | 10.33 |

## CIF 31

|   |    |   |        |       |
|---|----|---|--------|-------|
| 5 | -9 | 0 | 374.81 | 7.77  |
| 5 | -9 | 0 | 403.07 | 8.47  |
| 5 | -9 | 0 | 396.94 | 8.29  |
| 5 | -9 | 0 | 386.29 | 8.33  |
| 5 | -9 | 0 | 410.07 | 8.46  |
| 5 | -9 | 0 | 386.27 | 7.74  |
| 5 | -9 | 0 | 382.12 | 8.57  |
| 5 | -9 | 0 | 403.55 | 8.32  |
| 5 | -9 | 0 | 393.15 | 7.57  |
| 5 | -9 | 0 | 389.17 | 7.17  |
| 5 | -9 | 0 | 418.38 | 8.41  |
| 5 | -9 | 0 | 389.12 | 7.04  |
| 5 | -9 | 1 | 126.25 | 4.76  |
| 5 | -9 | 1 | 124.90 | 4.60  |
| 5 | -9 | 1 | 121.73 | 4.36  |
| 5 | -9 | 1 | 134.50 | 4.75  |
| 5 | -9 | 1 | 142.02 | 4.80  |
| 5 | -9 | 1 | 130.51 | 4.65  |
| 5 | -9 | 1 | 139.57 | 4.87  |
| 5 | -9 | 1 | 132.24 | 4.43  |
| 5 | -9 | 1 | 146.09 | 5.15  |
| 5 | -9 | 1 | 133.70 | 4.53  |
| 5 | -9 | 1 | 123.40 | 3.95  |
| 5 | -9 | 2 | 547.38 | 10.33 |
| 5 | -9 | 2 | 554.05 | 9.88  |
| 5 | -9 | 2 | 476.68 | 9.66  |
| 5 | -9 | 2 | 596.55 | 10.42 |
| 5 | -9 | 2 | 539.19 | 10.30 |
| 5 | -9 | 2 | 516.51 | 9.71  |
| 5 | -9 | 2 | 570.26 | 10.81 |
| 5 | -9 | 2 | 550.96 | 9.80  |
| 5 | -9 | 2 | 595.46 | 9.83  |
| 5 | -9 | 2 | 514.98 | 9.36  |
| 5 | -9 | 3 | 167.17 | 5.58  |
| 5 | -9 | 3 | 162.81 | 4.78  |
| 5 | -9 | 3 | 178.87 | 5.27  |
| 5 | -9 | 3 | 174.58 | 5.06  |
| 5 | -9 | 3 | 167.34 | 5.32  |
| 5 | -9 | 3 | 193.24 | 5.85  |
| 5 | -9 | 3 | 208.17 | 5.61  |
| 5 | -9 | 3 | 173.59 | 5.78  |

## CIF 31

|   |    |    |         |       |
|---|----|----|---------|-------|
| 5 | -9 | 3  | 192.38  | 5.35  |
| 5 | -9 | 3  | 166.81  | 5.11  |
| 5 | -9 | 4  | 1326.08 | 18.19 |
| 5 | -9 | 4  | 1250.11 | 16.23 |
| 5 | -9 | 4  | 1311.44 | 17.24 |
| 5 | -9 | 4  | 1366.41 | 16.96 |
| 5 | -9 | 4  | 1328.22 | 18.23 |
| 5 | -9 | 4  | 1158.13 | 16.31 |
| 5 | -9 | 4  | 1431.20 | 17.64 |
| 5 | -9 | 5  | 10.67   | 1.85  |
| 5 | -9 | 5  | 9.59    | 1.49  |
| 5 | -9 | 5  | 10.80   | 1.41  |
| 5 | -9 | 5  | 6.18    | 1.47  |
| 5 | -9 | 5  | 7.49    | 1.28  |
| 5 | -9 | 5  | 13.21   | 1.75  |
| 5 | -9 | 5  | 11.14   | 1.71  |
| 5 | -9 | 5  | 14.93   | 1.43  |
| 5 | -9 | 6  | 553.92  | 9.76  |
| 5 | -9 | 6  | 530.33  | 9.20  |
| 5 | -9 | 6  | 555.48  | 10.42 |
| 5 | -9 | 6  | 533.25  | 9.34  |
| 5 | -9 | 6  | 562.03  | 10.66 |
| 5 | -9 | 6  | 528.28  | 8.39  |
| 5 | -9 | 7  | 40.03   | 2.88  |
| 5 | -9 | 7  | 40.02   | 2.46  |
| 5 | -9 | 7  | 44.02   | 2.43  |
| 5 | -9 | 7  | 43.57   | 2.79  |
| 5 | -9 | 7  | 40.70   | 2.34  |
| 5 | -9 | 7  | 39.95   | 3.24  |
| 5 | -9 | 8  | 258.44  | 5.55  |
| 5 | -9 | 8  | 235.96  | 6.13  |
| 5 | -9 | 8  | 234.86  | 5.29  |
| 5 | -9 | 8  | 262.14  | 7.70  |
| 5 | -9 | 9  | 693.27  | 9.38  |
| 5 | -9 | 9  | 669.97  | 10.55 |
| 5 | -9 | 9  | 670.88  | 8.99  |
| 5 | -9 | 10 | 31.78   | 1.71  |
| 5 | -9 | 10 | 29.28   | 1.40  |
| 5 | -9 | 10 | 34.48   | 1.92  |
| 5 | -9 | 10 | 33.04   | 1.90  |
| 5 | -9 | 11 | 0.29    | 0.39  |

## CIF 31

|   |    |     |         |       |
|---|----|-----|---------|-------|
| 5 | -9 | 11  | 0.31    | 0.49  |
| 5 | -8 | -11 | 6.49    | 0.87  |
| 5 | -8 | -11 | 6.09    | 0.50  |
| 5 | -8 | -11 | 7.04    | 0.61  |
| 5 | -8 | -11 | 6.64    | 0.62  |
| 5 | -8 | -10 | 24.31   | 1.40  |
| 5 | -8 | -10 | 25.70   | 1.37  |
| 5 | -8 | -10 | 23.33   | 1.46  |
| 5 | -8 | -9  | 148.66  | 3.68  |
| 5 | -8 | -9  | 148.92  | 4.04  |
| 5 | -8 | -8  | 97.83   | 3.17  |
| 5 | -8 | -8  | 99.82   | 3.21  |
| 5 | -8 | -8  | 97.81   | 4.14  |
| 5 | -8 | -8  | 104.89  | 4.14  |
| 5 | -8 | -8  | 98.59   | 3.73  |
| 5 | -8 | -8  | 112.58  | 3.77  |
| 5 | -8 | -7  | 2.51    | 0.88  |
| 5 | -8 | -7  | 2.60    | 1.19  |
| 5 | -8 | -7  | 1.82    | 1.25  |
| 5 | -8 | -7  | 2.37    | 1.15  |
| 5 | -8 | -7  | 2.03    | 1.14  |
| 5 | -8 | -7  | 2.08    | 0.90  |
| 5 | -8 | -7  | 1.52    | 0.82  |
| 5 | -8 | -7  | 1.96    | 0.94  |
| 5 | -8 | -6  | 1362.09 | 19.05 |
| 5 | -8 | -6  | 1439.56 | 19.15 |
| 5 | -8 | -6  | 1418.78 | 19.24 |
| 5 | -8 | -6  | 1389.93 | 19.01 |
| 5 | -8 | -6  | 1457.31 | 18.61 |
| 5 | -8 | -6  | 1358.03 | 17.41 |
| 5 | -8 | -6  | 1387.26 | 18.23 |
| 5 | -8 | -6  | 1335.20 | 17.45 |
| 5 | -8 | -5  | 7.92    | 1.17  |
| 5 | -8 | -5  | 6.43    | 1.18  |
| 5 | -8 | -5  | 6.32    | 1.38  |
| 5 | -8 | -5  | 8.94    | 1.62  |
| 5 | -8 | -5  | 6.79    | 1.44  |
| 5 | -8 | -5  | 8.08    | 1.53  |
| 5 | -8 | -5  | 6.88    | 1.33  |
| 5 | -8 | -5  | 9.12    | 1.40  |
| 5 | -8 | -5  | 7.53    | 1.32  |

## CIF 31

|   |    |    |         |       |
|---|----|----|---------|-------|
| 5 | -8 | -5 | 7.13    | 1.06  |
| 5 | -8 | -4 | 1556.58 | 18.50 |
| 5 | -8 | -4 | 1510.83 | 18.39 |
| 5 | -8 | -4 | 1599.26 | 20.31 |
| 5 | -8 | -4 | 1626.32 | 20.41 |
| 5 | -8 | -4 | 1498.79 | 19.32 |
| 5 | -8 | -4 | 1488.27 | 18.50 |
| 5 | -8 | -4 | 1517.85 | 19.32 |
| 5 | -8 | -4 | 1525.02 | 18.54 |
| 5 | -8 | -3 | 3.33    | 1.22  |
| 5 | -8 | -3 | 3.07    | 1.07  |
| 5 | -8 | -3 | 3.06    | 1.20  |
| 5 | -8 | -3 | 2.32    | 1.02  |
| 5 | -8 | -3 | 1.83    | 0.83  |
| 5 | -8 | -3 | 1.54    | 0.83  |
| 5 | -8 | -3 | 2.64    | 1.08  |
| 5 | -8 | -3 | 0.29    | 0.76  |
| 5 | -8 | -2 | 265.06  | 6.38  |
| 5 | -8 | -2 | 266.56  | 6.26  |
| 5 | -8 | -2 | 268.34  | 6.63  |
| 5 | -8 | -2 | 288.96  | 6.87  |
| 5 | -8 | -2 | 256.76  | 6.11  |
| 5 | -8 | -2 | 248.16  | 6.14  |
| 5 | -8 | -2 | 275.52  | 6.55  |
| 5 | -8 | -2 | 273.60  | 5.99  |
| 5 | -8 | -2 | 275.81  | 6.56  |
| 5 | -8 | -2 | 256.63  | 5.80  |
| 5 | -8 | -1 | 60.17   | 2.83  |
| 5 | -8 | -1 | 58.14   | 3.00  |
| 5 | -8 | -1 | 64.87   | 3.20  |
| 5 | -8 | -1 | 66.67   | 3.21  |
| 5 | -8 | -1 | 73.06   | 3.40  |
| 5 | -8 | -1 | 56.29   | 2.78  |
| 5 | -8 | -1 | 64.62   | 3.23  |
| 5 | -8 | -1 | 63.76   | 3.03  |
| 5 | -8 | -1 | 50.10   | 2.46  |
| 5 | -8 | -1 | 58.05   | 2.57  |
| 5 | -8 | -1 | 69.39   | 3.25  |
| 5 | -8 | -1 | 60.91   | 2.58  |
| 5 | -8 | 0  | 43.67   | 2.40  |
| 5 | -8 | 0  | 41.83   | 2.51  |



## CIF 31

|   |    |   |        |       |
|---|----|---|--------|-------|
| 5 | -8 | 0 | 38.53  | 2.40  |
| 5 | -8 | 0 | 43.89  | 2.70  |
| 5 | -8 | 0 | 37.66  | 2.46  |
| 5 | -8 | 0 | 46.02  | 2.75  |
| 5 | -8 | 0 | 41.98  | 2.49  |
| 5 | -8 | 0 | 41.16  | 2.45  |
| 5 | -8 | 0 | 42.11  | 2.72  |
| 5 | -8 | 0 | 39.49  | 2.12  |
| 5 | -8 | 0 | 42.83  | 2.13  |
| 5 | -8 | 0 | 35.63  | 1.89  |
| 5 | -8 | 1 | 1.98   | 0.88  |
| 5 | -8 | 1 | 0.73   | 1.03  |
| 5 | -8 | 1 | 1.69   | 0.95  |
| 5 | -8 | 1 | 1.65   | 1.04  |
| 5 | -8 | 1 | 0.76   | 0.99  |
| 5 | -8 | 1 | 4.67   | 1.30  |
| 5 | -8 | 1 | 1.43   | 0.90  |
| 5 | -8 | 1 | 1.45   | 0.67  |
| 5 | -8 | 1 | 3.19   | 1.25  |
| 5 | -8 | 1 | 1.15   | 0.60  |
| 5 | -8 | 2 | 87.69  | 3.74  |
| 5 | -8 | 2 | 83.63  | 3.42  |
| 5 | -8 | 2 | 85.46  | 3.32  |
| 5 | -8 | 2 | 82.26  | 3.61  |
| 5 | -8 | 2 | 85.36  | 3.71  |
| 5 | -8 | 2 | 94.08  | 3.97  |
| 5 | -8 | 2 | 81.58  | 3.35  |
| 5 | -8 | 2 | 83.22  | 3.79  |
| 5 | -8 | 3 | 587.28 | 10.38 |
| 5 | -8 | 3 | 575.52 | 9.77  |
| 5 | -8 | 3 | 597.86 | 9.53  |
| 5 | -8 | 3 | 500.31 | 9.69  |
| 5 | -8 | 3 | 600.67 | 10.52 |
| 5 | -8 | 3 | 527.67 | 9.25  |
| 5 | -8 | 3 | 533.29 | 10.38 |
| 5 | -8 | 4 | 1.99   | 1.06  |
| 5 | -8 | 4 | 2.44   | 1.09  |
| 5 | -8 | 4 | 2.24   | 0.95  |
| 5 | -8 | 4 | 1.83   | 1.16  |
| 5 | -8 | 4 | 2.46   | 1.01  |
| 5 | -8 | 4 | 1.82   | 1.10  |

## CIF 31

|   |    |     |         |       |
|---|----|-----|---------|-------|
| 5 | -8 | 5   | 2.01    | 0.81  |
| 5 | -8 | 5   | 1.71    | 0.90  |
| 5 | -8 | 5   | 3.90    | 1.26  |
| 5 | -8 | 5   | 2.10    | 0.75  |
| 5 | -8 | 5   | 1.04    | 0.83  |
| 5 | -8 | 5   | 1.78    | 1.01  |
| 5 | -8 | 6   | 61.33   | 3.28  |
| 5 | -8 | 6   | 56.48   | 2.79  |
| 5 | -8 | 6   | 63.82   | 3.37  |
| 5 | -8 | 6   | 59.82   | 2.87  |
| 5 | -8 | 6   | 57.59   | 3.20  |
| 5 | -8 | 6   | 53.81   | 2.36  |
| 5 | -8 | 7   | 5.19    | 1.21  |
| 5 | -8 | 7   | 5.13    | 1.10  |
| 5 | -8 | 7   | 7.75    | 1.45  |
| 5 | -8 | 7   | 6.04    | 1.10  |
| 5 | -8 | 7   | 3.22    | 1.02  |
| 5 | -8 | 7   | 6.08    | 1.37  |
| 5 | -8 | 8   | 6.41    | 1.22  |
| 5 | -8 | 8   | 6.81    | 1.14  |
| 5 | -8 | 8   | 4.45    | 1.17  |
| 5 | -8 | 8   | 4.19    | 0.97  |
| 5 | -8 | 9   | 1.52    | 0.76  |
| 5 | -8 | 9   | 1.65    | 0.88  |
| 5 | -8 | 9   | 1.11    | 1.42  |
| 5 | -8 | 10  | 367.50  | 5.85  |
| 5 | -8 | 10  | 365.99  | 7.03  |
| 5 | -8 | 11  | 2.08    | 0.56  |
| 5 | -7 | -12 | 2.79    | 0.64  |
| 5 | -7 | -12 | 2.59    | 0.53  |
| 5 | -7 | -12 | 1.86    | 0.39  |
| 5 | -7 | -11 | 290.94  | 4.63  |
| 5 | -7 | -11 | 286.01  | 5.05  |
| 5 | -7 | -11 | 297.71  | 5.14  |
| 5 | -7 | -10 | 406.54  | 6.74  |
| 5 | -7 | -10 | 397.98  | 6.85  |
| 5 | -7 | -10 | 426.57  | 7.35  |
| 5 | -7 | -10 | 417.38  | 7.18  |
| 5 | -7 | -9  | 1103.85 | 13.72 |
| 5 | -7 | -9  | 1080.00 | 13.89 |
| 5 | -7 | -9  | 1061.56 | 15.78 |

## CIF 31

|   |    |    |         |       |
|---|----|----|---------|-------|
| 5 | -7 | -9 | 1104.24 | 15.54 |
| 5 | -7 | -9 | 1050.19 | 13.95 |
| 5 | -7 | -8 | 22.74   | 1.70  |
| 5 | -7 | -8 | 21.76   | 1.90  |
| 5 | -7 | -8 | 20.95   | 2.02  |
| 5 | -7 | -8 | 25.49   | 1.92  |
| 5 | -7 | -8 | 17.32   | 1.76  |
| 5 | -7 | -8 | 20.68   | 1.95  |
| 5 | -7 | -8 | 22.64   | 1.92  |
| 5 | -7 | -7 | 780.48  | 12.11 |
| 5 | -7 | -7 | 727.20  | 12.74 |
| 5 | -7 | -7 | 649.54  | 12.04 |
| 5 | -7 | -7 | 756.56  | 12.53 |
| 5 | -7 | -7 | 728.78  | 11.30 |
| 5 | -7 | -7 | 663.76  | 11.14 |
| 5 | -7 | -7 | 762.79  | 12.28 |
| 5 | -7 | -6 | 197.99  | 5.75  |
| 5 | -7 | -6 | 200.06  | 6.21  |
| 5 | -7 | -6 | 206.88  | 6.21  |
| 5 | -7 | -6 | 204.07  | 6.10  |
| 5 | -7 | -6 | 182.88  | 5.15  |
| 5 | -7 | -6 | 232.66  | 5.81  |
| 5 | -7 | -6 | 211.67  | 5.53  |
| 5 | -7 | -6 | 196.06  | 5.85  |
| 5 | -7 | -6 | 227.93  | 5.75  |
| 5 | -7 | -5 | 108.26  | 3.98  |
| 5 | -7 | -5 | 107.40  | 3.92  |
| 5 | -7 | -5 | 117.12  | 4.51  |
| 5 | -7 | -5 | 104.73  | 4.23  |
| 5 | -7 | -5 | 98.70   | 4.20  |
| 5 | -7 | -5 | 107.24  | 3.85  |
| 5 | -7 | -5 | 106.11  | 3.82  |
| 5 | -7 | -5 | 111.00  | 4.23  |
| 5 | -7 | -4 | 106.42  | 3.55  |
| 5 | -7 | -4 | 128.84  | 4.53  |
| 5 | -7 | -4 | 115.33  | 4.07  |
| 5 | -7 | -4 | 113.87  | 3.98  |
| 5 | -7 | -4 | 109.47  | 4.20  |
| 5 | -7 | -4 | 97.84   | 3.94  |
| 5 | -7 | -4 | 110.15  | 3.86  |
| 5 | -7 | -4 | 122.16  | 3.97  |

## CIF 31

|   |    |    |         |       |
|---|----|----|---------|-------|
| 5 | -7 | -4 | 110.85  | 4.14  |
| 5 | -7 | -3 | 145.90  | 4.31  |
| 5 | -7 | -3 | 141.38  | 4.80  |
| 5 | -7 | -3 | 149.58  | 4.77  |
| 5 | -7 | -3 | 155.50  | 4.77  |
| 5 | -7 | -3 | 144.75  | 4.49  |
| 5 | -7 | -3 | 148.60  | 4.81  |
| 5 | -7 | -3 | 144.62  | 4.75  |
| 5 | -7 | -3 | 152.47  | 4.81  |
| 5 | -7 | -3 | 152.89  | 4.59  |
| 5 | -7 | -3 | 149.57  | 4.25  |
| 5 | -7 | -3 | 154.05  | 4.69  |
| 5 | -7 | -3 | 155.67  | 4.33  |
| 5 | -7 | -3 | 152.26  | 4.72  |
| 5 | -7 | -2 | 1562.30 | 18.88 |
| 5 | -7 | -2 | 1643.37 | 18.18 |
| 5 | -7 | -2 | 1639.02 | 19.95 |
| 5 | -7 | -2 | 1849.62 | 20.23 |
| 5 | -7 | -2 | 1586.44 | 19.54 |
| 5 | -7 | -2 | 1584.91 | 19.73 |
| 5 | -7 | -2 | 1730.33 | 20.36 |
| 5 | -7 | -2 | 1580.41 | 19.86 |
| 5 | -7 | -2 | 1608.59 | 19.37 |
| 5 | -7 | -2 | 1595.04 | 19.22 |
| 5 | -7 | -2 | 1872.71 | 19.95 |
| 5 | -7 | -2 | 1653.16 | 19.78 |
| 5 | -7 | -2 | 1791.41 | 18.86 |
| 5 | -7 | -2 | 1738.93 | 18.54 |
| 5 | -7 | -1 | 53.11   | 2.59  |
| 5 | -7 | -1 | 62.12   | 2.62  |
| 5 | -7 | -1 | 51.34   | 2.70  |
| 5 | -7 | -1 | 57.98   | 2.65  |
| 5 | -7 | -1 | 52.07   | 2.53  |
| 5 | -7 | -1 | 47.22   | 2.68  |
| 5 | -7 | -1 | 50.09   | 2.63  |
| 5 | -7 | -1 | 53.77   | 2.72  |
| 5 | -7 | -1 | 53.17   | 2.74  |
| 5 | -7 | -1 | 56.90   | 2.89  |
| 5 | -7 | -1 | 52.04   | 2.70  |
| 5 | -7 | -1 | 59.34   | 2.65  |
| 5 | -7 | -1 | 55.43   | 2.80  |

## CIF 31

|   |    |    |        |       |
|---|----|----|--------|-------|
| 5 | -7 | -1 | 54.27  | 2.28  |
| 5 | -7 | -1 | 56.75  | 2.38  |
| 5 | -7 | -1 | 55.10  | 2.26  |
| 5 | -7 | 0  | 271.64 | 5.77  |
| 5 | -7 | 0  | 268.88 | 5.79  |
| 5 | -7 | 0  | 259.08 | 5.98  |
| 5 | -7 | 0  | 265.23 | 6.10  |
| 5 | -7 | 0  | 271.16 | 6.23  |
| 5 | -7 | 0  | 251.76 | 5.47  |
| 5 | -7 | 0  | 249.20 | 6.16  |
| 5 | -7 | 0  | 247.38 | 6.06  |
| 5 | -7 | 0  | 265.12 | 5.69  |
| 5 | -7 | 0  | 238.04 | 5.98  |
| 5 | -7 | 0  | 257.21 | 5.04  |
| 5 | -7 | 0  | 225.71 | 5.72  |
| 5 | -7 | 1  | 736.89 | 10.89 |
| 5 | -7 | 1  | 753.34 | 9.91  |
| 5 | -7 | 1  | 748.41 | 10.70 |
| 5 | -7 | 1  | 706.28 | 10.08 |
| 5 | -7 | 1  | 718.20 | 10.96 |
| 5 | -7 | 1  | 747.11 | 11.25 |
| 5 | -7 | 1  | 697.82 | 11.40 |
| 5 | -7 | 1  | 704.66 | 9.41  |
| 5 | -7 | 1  | 706.30 | 10.27 |
| 5 | -7 | 1  | 700.34 | 11.29 |
| 5 | -7 | 1  | 713.79 | 9.21  |
| 5 | -7 | 2  | 1.20   | 0.80  |
| 5 | -7 | 2  | 1.30   | 0.80  |
| 5 | -7 | 2  | 4.80   | 0.92  |
| 5 | -7 | 2  | 0.86   | 0.86  |
| 5 | -7 | 2  | 1.46   | 0.91  |
| 5 | -7 | 2  | 2.22   | 0.64  |
| 5 | -7 | 2  | 1.47   | 0.74  |
| 5 | -7 | 2  | 2.90   | 1.04  |
| 5 | -7 | 3  | 318.59 | 6.86  |
| 5 | -7 | 3  | 280.07 | 5.85  |
| 5 | -7 | 3  | 276.19 | 6.63  |
| 5 | -7 | 3  | 315.00 | 6.24  |
| 5 | -7 | 3  | 271.98 | 5.89  |
| 5 | -7 | 4  | 224.88 | 5.95  |
| 5 | -7 | 4  | 218.34 | 5.18  |

## CIF 31

|   |    |     |         |       |
|---|----|-----|---------|-------|
| 5 | -7 | 4   | 224.48  | 5.50  |
| 5 | -7 | 4   | 214.80  | 5.24  |
| 5 | -7 | 4   | 215.79  | 5.95  |
| 5 | -7 | 5   | 414.61  | 8.57  |
| 5 | -7 | 5   | 426.50  | 8.26  |
| 5 | -7 | 6   | 16.39   | 1.80  |
| 5 | -7 | 6   | 16.03   | 1.66  |
| 5 | -7 | 6   | 16.32   | 1.61  |
| 5 | -7 | 6   | 15.42   | 1.75  |
| 5 | -7 | 7   | 495.62  | 9.62  |
| 5 | -7 | 7   | 471.06  | 9.37  |
| 5 | -7 | 8   | 29.04   | 2.30  |
| 5 | -7 | 8   | 37.60   | 2.67  |
| 5 | -7 | 9   | 384.06  | 8.02  |
| 5 | -7 | 9   | 494.11  | 9.70  |
| 5 | -7 | 10  | 223.78  | 5.51  |
| 5 | -7 | 10  | 226.10  | 6.47  |
| 5 | -7 | 11  | 380.65  | 6.54  |
| 5 | -6 | -13 | 11.03   | 0.78  |
| 5 | -6 | -12 | 286.11  | 5.16  |
| 5 | -6 | -12 | 278.94  | 4.77  |
| 5 | -6 | -11 | 592.71  | 8.82  |
| 5 | -6 | -11 | 555.40  | 8.39  |
| 5 | -6 | -10 | 364.51  | 6.81  |
| 5 | -6 | -10 | 403.93  | 7.41  |
| 5 | -6 | -10 | 382.05  | 7.99  |
| 5 | -6 | -10 | 351.12  | 8.04  |
| 5 | -6 | -10 | 403.90  | 7.67  |
| 5 | -6 | -10 | 399.57  | 7.48  |
| 5 | -6 | -9  | 382.42  | 7.34  |
| 5 | -6 | -9  | 402.46  | 8.69  |
| 5 | -6 | -9  | 401.95  | 8.93  |
| 5 | -6 | -9  | 399.48  | 7.60  |
| 5 | -6 | -8  | 1160.48 | 15.23 |
| 5 | -6 | -8  | 1291.41 | 17.41 |
| 5 | -6 | -8  | 1258.95 | 17.91 |
| 5 | -6 | -8  | 1153.70 | 16.15 |
| 5 | -6 | -8  | 1216.55 | 15.75 |
| 5 | -6 | -8  | 1375.42 | 16.91 |
| 5 | -6 | -8  | 1222.00 | 17.41 |
| 5 | -6 | -7  | 351.84  | 8.02  |

## CIF 31

|   |    |    |         |       |
|---|----|----|---------|-------|
| 5 | -6 | -7 | 367.27  | 8.41  |
| 5 | -6 | -7 | 356.21  | 8.34  |
| 5 | -6 | -7 | 342.21  | 7.91  |
| 5 | -6 | -7 | 324.34  | 7.99  |
| 5 | -6 | -7 | 351.66  | 8.27  |
| 5 | -6 | -7 | 331.10  | 7.44  |
| 5 | -6 | -7 | 342.91  | 7.08  |
| 5 | -6 | -7 | 318.87  | 7.03  |
| 5 | -6 | -7 | 343.52  | 7.89  |
| 5 | -6 | -6 | 585.68  | 9.59  |
| 5 | -6 | -6 | 618.43  | 10.33 |
| 5 | -6 | -6 | 623.58  | 10.90 |
| 5 | -6 | -6 | 599.03  | 10.89 |
| 5 | -6 | -6 | 580.02  | 10.46 |
| 5 | -6 | -6 | 634.59  | 11.21 |
| 5 | -6 | -6 | 569.85  | 10.70 |
| 5 | -6 | -6 | 631.31  | 10.99 |
| 5 | -6 | -6 | 594.19  | 10.22 |
| 5 | -6 | -6 | 587.19  | 9.61  |
| 5 | -6 | -6 | 569.50  | 9.69  |
| 5 | -6 | -6 | 609.95  | 10.71 |
| 5 | -6 | -5 | 34.61   | 2.10  |
| 5 | -6 | -5 | 36.08   | 2.38  |
| 5 | -6 | -5 | 32.59   | 2.23  |
| 5 | -6 | -5 | 40.21   | 2.47  |
| 5 | -6 | -5 | 39.48   | 2.56  |
| 5 | -6 | -5 | 41.01   | 2.51  |
| 5 | -6 | -5 | 40.07   | 2.56  |
| 5 | -6 | -5 | 40.28   | 2.55  |
| 5 | -6 | -5 | 39.12   | 2.33  |
| 5 | -6 | -5 | 37.46   | 2.18  |
| 5 | -6 | -5 | 35.16   | 2.12  |
| 5 | -6 | -5 | 42.49   | 2.53  |
| 5 | -6 | -4 | 1186.79 | 14.93 |
| 5 | -6 | -4 | 1239.58 | 15.97 |
| 5 | -6 | -4 | 1209.32 | 15.93 |
| 5 | -6 | -4 | 1197.43 | 15.63 |
| 5 | -6 | -4 | 1267.70 | 16.32 |
| 5 | -6 | -4 | 1187.25 | 14.67 |
| 5 | -6 | -4 | 1220.20 | 15.90 |
| 5 | -6 | -4 | 1208.72 | 16.03 |

## CIF 31

|   |    |    |         |       |
|---|----|----|---------|-------|
| 5 | -6 | -4 | 1254.32 | 15.79 |
| 5 | -6 | -4 | 1262.71 | 14.90 |
| 5 | -6 | -4 | 1229.86 | 15.87 |
| 5 | -6 | -3 | 249.45  | 5.76  |
| 5 | -6 | -3 | 316.25  | 6.53  |
| 5 | -6 | -3 | 266.64  | 6.18  |
| 5 | -6 | -3 | 243.53  | 5.97  |
| 5 | -6 | -3 | 302.64  | 6.41  |
| 5 | -6 | -3 | 280.85  | 6.31  |
| 5 | -6 | -3 | 279.85  | 6.14  |
| 5 | -6 | -3 | 258.47  | 5.45  |
| 5 | -6 | -3 | 259.05  | 5.64  |
| 5 | -6 | -3 | 283.99  | 6.22  |
| 5 | -6 | -2 | 6.38    | 1.08  |
| 5 | -6 | -2 | 8.49    | 0.97  |
| 5 | -6 | -2 | 7.03    | 1.08  |
| 5 | -6 | -2 | 7.62    | 1.25  |
| 5 | -6 | -2 | 5.33    | 1.10  |
| 5 | -6 | -2 | 7.57    | 1.16  |
| 5 | -6 | -2 | 7.70    | 1.21  |
| 5 | -6 | -2 | 5.65    | 1.02  |
| 5 | -6 | -2 | 7.10    | 1.00  |
| 5 | -6 | -2 | 6.97    | 1.06  |
| 5 | -6 | -2 | 5.63    | 1.05  |
| 5 | -6 | -1 | 589.45  | 9.39  |
| 5 | -6 | -1 | 624.57  | 8.72  |
| 5 | -6 | -1 | 577.86  | 9.21  |
| 5 | -6 | -1 | 598.15  | 9.11  |
| 5 | -6 | -1 | 557.10  | 8.54  |
| 5 | -6 | -1 | 585.22  | 9.19  |
| 5 | -6 | -1 | 602.77  | 9.38  |
| 5 | -6 | -1 | 585.72  | 9.65  |
| 5 | -6 | -1 | 595.04  | 9.57  |
| 5 | -6 | -1 | 641.19  | 8.89  |
| 5 | -6 | -1 | 608.93  | 9.30  |
| 5 | -6 | 0  | 4.12    | 0.98  |
| 5 | -6 | 0  | 3.33    | 0.82  |
| 5 | -6 | 0  | 2.69    | 0.76  |
| 5 | -6 | 0  | 5.18    | 0.86  |
| 5 | -6 | 0  | 3.45    | 0.90  |
| 5 | -6 | 0  | 4.21    | 0.88  |



## CIF 31

|   |    |     |        |       |
|---|----|-----|--------|-------|
| 5 | -6 | 0   | 2.60   | 0.91  |
| 5 | -6 | 0   | 3.36   | 0.75  |
| 5 | -6 | 0   | 3.26   | 0.89  |
| 5 | -6 | 1   | 7.15   | 1.08  |
| 5 | -6 | 1   | 5.35   | 0.84  |
| 5 | -6 | 1   | 6.70   | 0.95  |
| 5 | -6 | 1   | 5.69   | 1.03  |
| 5 | -6 | 1   | 5.89   | 1.06  |
| 5 | -6 | 1   | 6.86   | 1.13  |
| 5 | -6 | 2   | 6.52   | 1.07  |
| 5 | -6 | 2   | 6.86   | 0.84  |
| 5 | -6 | 2   | 9.10   | 1.25  |
| 5 | -6 | 2   | 7.75   | 1.16  |
| 5 | -6 | 2   | 8.29   | 0.73  |
| 5 | -6 | 3   | 585.33 | 9.58  |
| 5 | -6 | 3   | 577.02 | 9.54  |
| 5 | -6 | 4   | 3.31   | 0.83  |
| 5 | -6 | 4   | 3.37   | 1.01  |
| 5 | -6 | 5   | 543.03 | 9.61  |
| 5 | -6 | 5   | 531.02 | 9.28  |
| 5 | -6 | 5   | 520.71 | 9.42  |
| 5 | -6 | 6   | 163.26 | 5.05  |
| 5 | -6 | 6   | 152.50 | 4.91  |
| 5 | -6 | 6   | 171.04 | 5.11  |
| 5 | -6 | 7   | 121.51 | 4.39  |
| 5 | -6 | 7   | 112.98 | 4.19  |
| 5 | -6 | 8   | 72.85  | 3.36  |
| 5 | -6 | 9   | 354.73 | 7.85  |
| 5 | -6 | 10  | 193.40 | 5.45  |
| 5 | -6 | 11  | 18.34  | 1.36  |
| 5 | -5 | -13 | 49.64  | 1.95  |
| 5 | -5 | -13 | 44.27  | 1.58  |
| 5 | -5 | -12 | 47.92  | 2.24  |
| 5 | -5 | -12 | 49.68  | 2.35  |
| 5 | -5 | -12 | 45.00  | 2.07  |
| 5 | -5 | -11 | 491.06 | 8.14  |
| 5 | -5 | -11 | 492.68 | 7.53  |
| 5 | -5 | -11 | 498.68 | 8.45  |
| 5 | -5 | -11 | 515.32 | 10.00 |
| 5 | -5 | -10 | 45.30  | 2.41  |
| 5 | -5 | -10 | 50.69  | 3.12  |

## CIF 31

|   |    |     |        |       |
|---|----|-----|--------|-------|
| 5 | -5 | -10 | 47.66  | 3.08  |
| 5 | -5 | -10 | 47.01  | 2.82  |
| 5 | -5 | -10 | 50.83  | 2.66  |
| 5 | -5 | -9  | 25.60  | 1.85  |
| 5 | -5 | -9  | 27.58  | 2.43  |
| 5 | -5 | -9  | 24.49  | 2.34  |
| 5 | -5 | -9  | 26.36  | 2.45  |
| 5 | -5 | -9  | 31.07  | 2.37  |
| 5 | -5 | -9  | 33.77  | 2.11  |
| 5 | -5 | -9  | 25.08  | 2.10  |
| 5 | -5 | -9  | 26.62  | 2.16  |
| 5 | -5 | -8  | 600.85 | 10.16 |
| 5 | -5 | -8  | 630.21 | 11.61 |
| 5 | -5 | -8  | 592.99 | 11.29 |
| 5 | -5 | -8  | 596.16 | 11.28 |
| 5 | -5 | -8  | 623.99 | 11.38 |
| 5 | -5 | -8  | 598.07 | 10.77 |
| 5 | -5 | -8  | 614.06 | 9.79  |
| 5 | -5 | -8  | 617.13 | 11.12 |
| 5 | -5 | -8  | 600.97 | 10.15 |
| 5 | -5 | -7  | 270.33 | 6.32  |
| 5 | -5 | -7  | 296.32 | 7.15  |
| 5 | -5 | -7  | 296.96 | 7.29  |
| 5 | -5 | -7  | 253.71 | 6.62  |
| 5 | -5 | -7  | 265.25 | 6.85  |
| 5 | -5 | -7  | 240.18 | 6.38  |
| 5 | -5 | -7  | 293.24 | 7.09  |
| 5 | -5 | -7  | 279.28 | 7.08  |
| 5 | -5 | -7  | 279.07 | 6.76  |
| 5 | -5 | -7  | 287.91 | 6.99  |
| 5 | -5 | -7  | 275.62 | 6.23  |
| 5 | -5 | -6  | 38.42  | 2.28  |
| 5 | -5 | -6  | 37.54  | 2.51  |
| 5 | -5 | -6  | 41.15  | 2.34  |
| 5 | -5 | -6  | 38.74  | 2.49  |
| 5 | -5 | -6  | 37.16  | 2.38  |
| 5 | -5 | -6  | 37.84  | 2.40  |
| 5 | -5 | -6  | 42.79  | 2.59  |
| 5 | -5 | -6  | 33.01  | 2.21  |
| 5 | -5 | -6  | 45.19  | 2.66  |
| 5 | -5 | -6  | 37.88  | 2.14  |

## CIF 31

|   |    |    |        |       |
|---|----|----|--------|-------|
| 5 | -5 | -6 | 40.27  | 2.57  |
| 5 | -5 | -6 | 37.25  | 2.38  |
| 5 | -5 | -6 | 41.39  | 2.53  |
| 5 | -5 | -6 | 45.15  | 2.35  |
| 5 | -5 | -5 | 775.95 | 11.43 |
| 5 | -5 | -5 | 826.92 | 12.09 |
| 5 | -5 | -5 | 822.86 | 11.89 |
| 5 | -5 | -5 | 861.50 | 11.91 |
| 5 | -5 | -5 | 826.13 | 11.75 |
| 5 | -5 | -5 | 835.10 | 12.23 |
| 5 | -5 | -5 | 773.31 | 11.65 |
| 5 | -5 | -5 | 803.72 | 11.28 |
| 5 | -5 | -5 | 876.45 | 12.29 |
| 5 | -5 | -5 | 780.42 | 11.90 |
| 5 | -5 | -5 | 799.13 | 11.87 |
| 5 | -5 | -5 | 769.82 | 11.81 |
| 5 | -5 | -5 | 850.16 | 11.10 |
| 5 | -5 | -4 | 6.92   | 1.29  |
| 5 | -5 | -4 | 6.99   | 1.08  |
| 5 | -5 | -4 | 6.77   | 1.33  |
| 5 | -5 | -4 | 7.22   | 1.14  |
| 5 | -5 | -4 | 6.42   | 1.12  |
| 5 | -5 | -4 | 7.13   | 1.04  |
| 5 | -5 | -4 | 9.83   | 1.21  |
| 5 | -5 | -4 | 6.38   | 1.13  |
| 5 | -5 | -4 | 9.03   | 1.27  |
| 5 | -5 | -4 | 7.80   | 1.19  |
| 5 | -5 | -4 | 8.13   | 1.27  |
| 5 | -5 | -4 | 5.92   | 0.85  |
| 5 | -5 | -4 | 5.90   | 0.84  |
| 5 | -5 | -4 | 7.16   | 1.12  |
| 5 | -5 | -3 | 24.23  | 1.76  |
| 5 | -5 | -3 | 22.71  | 1.24  |
| 5 | -5 | -3 | 18.86  | 1.52  |
| 5 | -5 | -3 | 22.87  | 1.74  |
| 5 | -5 | -3 | 22.01  | 1.60  |
| 5 | -5 | -3 | 22.23  | 1.64  |
| 5 | -5 | -3 | 33.53  | 1.93  |
| 5 | -5 | -3 | 25.80  | 1.80  |
| 5 | -5 | -3 | 38.82  | 1.83  |
| 5 | -5 | -2 | 1.02   | 0.74  |

## CIF 31

|   |    |     |         |       |
|---|----|-----|---------|-------|
| 5 | -5 | -2  | 0.93    | 0.63  |
| 5 | -5 | -2  | 0.73    | 0.75  |
| 5 | -5 | -2  | 2.10    | 0.75  |
| 5 | -5 | -2  | 0.78    | 0.61  |
| 5 | -5 | -2  | 0.68    | 0.69  |
| 5 | -5 | -2  | 0.58    | 0.54  |
| 5 | -5 | -2  | 0.97    | 0.69  |
| 5 | -5 | -2  | 0.16    | 0.56  |
| 5 | -5 | -1  | 431.07  | 7.15  |
| 5 | -5 | -1  | 453.76  | 7.33  |
| 5 | -5 | -1  | 415.04  | 6.98  |
| 5 | -5 | -1  | 478.61  | 7.57  |
| 5 | -5 | -1  | 473.60  | 7.40  |
| 5 | -5 | -1  | 417.75  | 7.53  |
| 5 | -5 | -1  | 437.44  | 7.07  |
| 5 | -5 | -1  | 435.12  | 7.62  |
| 5 | -5 | 0   | 160.99  | 3.89  |
| 5 | -5 | 0   | 153.18  | 3.88  |
| 5 | -5 | 0   | 148.57  | 3.85  |
| 5 | -5 | 0   | 145.66  | 4.10  |
| 5 | -5 | 0   | 168.91  | 4.14  |
| 5 | -5 | 1   | 1107.54 | 12.83 |
| 5 | -5 | 1   | 1110.97 | 13.41 |
| 5 | -5 | 1   | 1113.76 | 13.56 |
| 5 | -5 | 2   | 17.79   | 1.23  |
| 5 | -5 | 2   | 20.24   | 1.52  |
| 5 | -5 | 3   | 27.08   | 1.37  |
| 5 | -5 | 3   | 29.50   | 1.90  |
| 5 | -5 | 4   | 141.26  | 4.29  |
| 5 | -5 | 5   | 773.56  | 11.61 |
| 5 | -5 | 5   | 738.26  | 11.35 |
| 5 | -5 | 5   | 766.66  | 11.49 |
| 5 | -5 | 6   | 401.11  | 8.00  |
| 5 | -5 | 6   | 385.24  | 8.01  |
| 5 | -5 | 6   | 402.72  | 7.94  |
| 5 | -5 | 7   | 640.10  | 10.40 |
| 5 | -5 | 7   | 616.20  | 10.20 |
| 5 | -5 | 8   | 1216.10 | 16.00 |
| 5 | -5 | 9   | 298.10  | 7.06  |
| 5 | -5 | 10  | 27.30   | 1.99  |
| 5 | -4 | -14 | 4.71    | 0.65  |

## CIF 31

|   |    |     |         |       |
|---|----|-----|---------|-------|
| 5 | -4 | -14 | 4.26    | 0.69  |
| 5 | -4 | -13 | 282.94  | 5.20  |
| 5 | -4 | -13 | 291.22  | 5.48  |
| 5 | -4 | -12 | 227.24  | 5.10  |
| 5 | -4 | -12 | 249.96  | 5.60  |
| 5 | -4 | -12 | 247.39  | 6.73  |
| 5 | -4 | -12 | 237.55  | 5.66  |
| 5 | -4 | -11 | 1124.13 | 14.82 |
| 5 | -4 | -11 | 1238.72 | 17.95 |
| 5 | -4 | -11 | 1068.19 | 16.26 |
| 5 | -4 | -11 | 1329.18 | 16.39 |
| 5 | -4 | -10 | 102.41  | 4.07  |
| 5 | -4 | -10 | 98.61   | 3.61  |
| 5 | -4 | -10 | 107.66  | 4.73  |
| 5 | -4 | -10 | 97.29   | 4.51  |
| 5 | -4 | -10 | 104.53  | 4.48  |
| 5 | -4 | -10 | 97.96   | 3.37  |
| 5 | -4 | -10 | 121.69  | 4.28  |
| 5 | -4 | -10 | 118.16  | 4.19  |
| 5 | -4 | -9  | 533.23  | 10.11 |
| 5 | -4 | -9  | 574.22  | 10.36 |
| 5 | -4 | -9  | 519.21  | 9.03  |
| 5 | -4 | -9  | 620.23  | 11.62 |
| 5 | -4 | -9  | 570.91  | 10.92 |
| 5 | -4 | -9  | 555.30  | 11.17 |
| 5 | -4 | -9  | 558.58  | 10.73 |
| 5 | -4 | -9  | 555.86  | 9.07  |
| 5 | -4 | -9  | 605.61  | 10.06 |
| 5 | -4 | -9  | 533.75  | 10.09 |
| 5 | -4 | -8  | 1.48    | 0.85  |
| 5 | -4 | -8  | 1.98    | 0.91  |
| 5 | -4 | -8  | 2.58    | 1.12  |
| 5 | -4 | -8  | 2.46    | 1.00  |
| 5 | -4 | -8  | 2.65    | 1.11  |
| 5 | -4 | -8  | 2.37    | 1.13  |
| 5 | -4 | -8  | 2.66    | 0.96  |
| 5 | -4 | -8  | 2.63    | 1.11  |
| 5 | -4 | -8  | 2.23    | 1.12  |
| 5 | -4 | -8  | 3.07    | 0.92  |
| 5 | -4 | -7  | 436.22  | 8.45  |
| 5 | -4 | -7  | 464.26  | 8.86  |

## CIF 31

|   |    |    |         |       |
|---|----|----|---------|-------|
| 5 | -4 | -7 | 486.70  | 8.93  |
| 5 | -4 | -7 | 438.38  | 8.64  |
| 5 | -4 | -7 | 445.28  | 8.73  |
| 5 | -4 | -7 | 452.91  | 8.81  |
| 5 | -4 | -7 | 462.85  | 8.99  |
| 5 | -4 | -7 | 468.80  | 8.10  |
| 5 | -4 | -6 | 532.99  | 9.14  |
| 5 | -4 | -6 | 582.41  | 9.55  |
| 5 | -4 | -6 | 539.47  | 9.45  |
| 5 | -4 | -6 | 551.86  | 8.84  |
| 5 | -4 | -6 | 513.64  | 9.36  |
| 5 | -4 | -6 | 549.07  | 9.33  |
| 5 | -4 | -6 | 556.88  | 9.17  |
| 5 | -4 | -6 | 601.75  | 9.79  |
| 5 | -4 | -6 | 539.61  | 8.99  |
| 5 | -4 | -6 | 557.18  | 9.41  |
| 5 | -4 | -6 | 566.14  | 9.17  |
| 5 | -4 | -6 | 567.06  | 9.60  |
| 5 | -4 | -6 | 573.70  | 8.83  |
| 5 | -4 | -6 | 527.94  | 8.36  |
| 5 | -4 | -5 | 3210.27 | 29.75 |
| 5 | -4 | -5 | 3165.42 | 30.09 |
| 5 | -4 | -5 | 2912.91 | 29.61 |
| 5 | -4 | -5 | 2910.33 | 29.64 |
| 5 | -4 | -5 | 2945.22 | 29.50 |
| 5 | -4 | -5 | 3016.04 | 28.80 |
| 5 | -4 | -5 | 2857.99 | 29.21 |
| 5 | -4 | -5 | 2964.50 | 28.82 |
| 5 | -4 | -5 | 2970.68 | 29.25 |
| 5 | -4 | -5 | 3021.24 | 29.29 |
| 5 | -4 | -5 | 2565.26 | 28.13 |
| 5 | -4 | -5 | 2832.84 | 29.46 |
| 5 | -4 | -5 | 2904.05 | 28.90 |
| 5 | -4 | -5 | 2616.57 | 27.46 |
| 5 | -4 | -4 | 180.19  | 4.60  |
| 5 | -4 | -4 | 168.10  | 4.20  |
| 5 | -4 | -4 | 187.06  | 4.78  |
| 5 | -4 | -4 | 191.03  | 4.72  |
| 5 | -4 | -4 | 177.07  | 4.35  |
| 5 | -4 | -4 | 197.58  | 4.36  |
| 5 | -4 | -4 | 204.12  | 4.61  |

## CIF 31

|   |    |    |        |       |
|---|----|----|--------|-------|
| 5 | -4 | -4 | 207.65 | 4.99  |
| 5 | -4 | -4 | 181.38 | 4.60  |
| 5 | -4 | -4 | 197.43 | 5.59  |
| 5 | -4 | -4 | 185.22 | 3.72  |
| 5 | -4 | -4 | 184.84 | 4.58  |
| 5 | -4 | -3 | 126.91 | 3.70  |
| 5 | -4 | -3 | 100.04 | 3.05  |
| 5 | -4 | -3 | 115.90 | 3.58  |
| 5 | -4 | -3 | 115.94 | 3.30  |
| 5 | -4 | -3 | 110.77 | 3.28  |
| 5 | -4 | -3 | 143.18 | 3.58  |
| 5 | -4 | -3 | 123.36 | 3.58  |
| 5 | -4 | -3 | 116.42 | 3.59  |
| 5 | -4 | -3 | 128.29 | 4.34  |
| 5 | -4 | -3 | 118.21 | 2.99  |
| 5 | -4 | -3 | 128.50 | 3.58  |
| 5 | -4 | -2 | 17.89  | 1.44  |
| 5 | -4 | -2 | 18.30  | 1.45  |
| 5 | -4 | -2 | 17.45  | 1.28  |
| 5 | -4 | -2 | 17.94  | 1.24  |
| 5 | -4 | -2 | 17.00  | 1.29  |
| 5 | -4 | -2 | 15.22  | 1.20  |
| 5 | -4 | -2 | 16.38  | 1.32  |
| 5 | -4 | -2 | 16.44  | 1.42  |
| 5 | -4 | -2 | 17.00  | 1.61  |
| 5 | -4 | -2 | 18.80  | 1.23  |
| 5 | -4 | -1 | 758.81 | 10.03 |
| 5 | -4 | -1 | 761.12 | 9.57  |
| 5 | -4 | -1 | 741.30 | 9.77  |
| 5 | -4 | -1 | 792.82 | 9.65  |
| 5 | -4 | -1 | 715.10 | 9.53  |
| 5 | -4 | -1 | 761.80 | 10.55 |
| 5 | -4 | 0  | 125.70 | 3.32  |
| 5 | -4 | 0  | 124.62 | 3.18  |
| 5 | -4 | 0  | 124.00 | 3.18  |
| 5 | -4 | 0  | 127.81 | 3.55  |
| 5 | -4 | 0  | 124.06 | 4.26  |
| 5 | -4 | 0  | 124.28 | 3.34  |
| 5 | -4 | 1  | 347.75 | 5.72  |
| 5 | -4 | 1  | 343.92 | 7.36  |
| 5 | -4 | 1  | 359.32 | 6.15  |

## CIF 31

|   |    |     |         |       |
|---|----|-----|---------|-------|
| 5 | -4 | 2   | 10.54   | 0.98  |
| 5 | -4 | 2   | 10.54   | 1.08  |
| 5 | -4 | 2   | 7.60    | 1.20  |
| 5 | -4 | 3   | 619.44  | 10.79 |
| 5 | -4 | 3   | 636.82  | 9.32  |
| 5 | -4 | 4   | 584.88  | 9.15  |
| 5 | -4 | 5   | 1021.74 | 13.60 |
| 5 | -4 | 6   | 12.55   | 1.45  |
| 5 | -4 | 6   | 13.41   | 1.41  |
| 5 | -4 | 7   | 27.51   | 1.95  |
| 5 | -4 | 7   | 25.87   | 2.07  |
| 5 | -4 | 7   | 28.08   | 1.94  |
| 5 | -4 | 8   | 502.12  | 8.78  |
| 5 | -4 | 9   | 192.11  | 5.28  |
| 5 | -3 | -14 | 10.45   | 0.96  |
| 5 | -3 | -14 | 9.83    | 1.01  |
| 5 | -3 | -13 | 51.36   | 2.22  |
| 5 | -3 | -13 | 53.69   | 3.17  |
| 5 | -3 | -13 | 60.00   | 2.65  |
| 5 | -3 | -12 | 151.42  | 4.87  |
| 5 | -3 | -12 | 149.53  | 4.30  |
| 5 | -3 | -12 | 164.72  | 5.97  |
| 5 | -3 | -12 | 150.03  | 4.64  |
| 5 | -3 | -11 | 77.26   | 3.77  |
| 5 | -3 | -11 | 75.00   | 3.16  |
| 5 | -3 | -11 | 78.45   | 4.20  |
| 5 | -3 | -11 | 74.32   | 3.92  |
| 5 | -3 | -11 | 89.77   | 3.63  |
| 5 | -3 | -11 | 75.18   | 3.29  |
| 5 | -3 | -10 | 724.92  | 12.61 |
| 5 | -3 | -10 | 779.93  | 13.04 |
| 5 | -3 | -10 | 711.84  | 11.08 |
| 5 | -3 | -10 | 830.66  | 14.16 |
| 5 | -3 | -10 | 718.06  | 13.29 |
| 5 | -3 | -10 | 729.25  | 13.18 |
| 5 | -3 | -10 | 740.07  | 10.55 |
| 5 | -3 | -10 | 779.65  | 11.92 |
| 5 | -3 | -10 | 792.39  | 12.41 |
| 5 | -3 | -9  | 594.99  | 10.92 |
| 5 | -3 | -9  | 628.06  | 11.34 |
| 5 | -3 | -9  | 591.14  | 10.10 |



## CIF 31

|   |    |    |        |       |
|---|----|----|--------|-------|
| 5 | -3 | -9 | 641.17 | 11.81 |
| 5 | -3 | -9 | 621.86 | 10.56 |
| 5 | -3 | -9 | 625.31 | 11.59 |
| 5 | -3 | -9 | 599.04 | 10.00 |
| 5 | -3 | -9 | 580.06 | 10.48 |
| 5 | -3 | -8 | 32.13  | 2.32  |
| 5 | -3 | -8 | 34.93  | 2.47  |
| 5 | -3 | -8 | 34.76  | 2.23  |
| 5 | -3 | -8 | 37.90  | 2.42  |
| 5 | -3 | -8 | 31.55  | 2.46  |
| 5 | -3 | -8 | 28.23  | 2.17  |
| 5 | -3 | -8 | 31.29  | 2.25  |
| 5 | -3 | -8 | 33.33  | 2.42  |
| 5 | -3 | -8 | 30.56  | 2.03  |
| 5 | -3 | -8 | 34.16  | 2.38  |
| 5 | -3 | -8 | 37.47  | 2.20  |
| 5 | -3 | -8 | 35.43  | 2.38  |
| 5 | -3 | -7 | 391.70 | 7.67  |
| 5 | -3 | -7 | 406.63 | 7.63  |
| 5 | -3 | -7 | 387.71 | 7.80  |
| 5 | -3 | -7 | 410.63 | 7.86  |
| 5 | -3 | -7 | 400.63 | 7.78  |
| 5 | -3 | -7 | 404.26 | 8.09  |
| 5 | -3 | -7 | 400.30 | 7.48  |
| 5 | -3 | -7 | 414.02 | 8.16  |
| 5 | -3 | -7 | 393.21 | 7.86  |
| 5 | -3 | -7 | 396.48 | 6.98  |
| 5 | -3 | -6 | 64.47  | 2.85  |
| 5 | -3 | -6 | 66.06  | 2.92  |
| 5 | -3 | -6 | 61.29  | 2.77  |
| 5 | -3 | -6 | 66.64  | 3.02  |
| 5 | -3 | -6 | 59.90  | 2.83  |
| 5 | -3 | -6 | 65.05  | 2.84  |
| 5 | -3 | -6 | 63.15  | 2.70  |
| 5 | -3 | -6 | 63.79  | 2.81  |
| 5 | -3 | -6 | 64.33  | 2.71  |
| 5 | -3 | -6 | 63.20  | 2.84  |
| 5 | -3 | -6 | 66.93  | 2.82  |
| 5 | -3 | -6 | 58.95  | 2.77  |
| 5 | -3 | -6 | 65.17  | 2.86  |
| 5 | -3 | -6 | 59.59  | 2.71  |

## CIF 31

|   |    |    |         |       |
|---|----|----|---------|-------|
| 5 | -3 | -6 | 60.18   | 2.33  |
| 5 | -3 | -5 | 128.17  | 3.83  |
| 5 | -3 | -5 | 122.68  | 3.35  |
| 5 | -3 | -5 | 126.62  | 3.82  |
| 5 | -3 | -5 | 119.90  | 3.91  |
| 5 | -3 | -5 | 125.95  | 3.54  |
| 5 | -3 | -5 | 114.40  | 3.65  |
| 5 | -3 | -5 | 120.86  | 3.45  |
| 5 | -3 | -5 | 124.40  | 3.69  |
| 5 | -3 | -5 | 108.36  | 3.68  |
| 5 | -3 | -5 | 114.43  | 3.68  |
| 5 | -3 | -5 | 113.17  | 3.35  |
| 5 | -3 | -5 | 115.00  | 3.66  |
| 5 | -3 | -5 | 122.36  | 4.12  |
| 5 | -3 | -5 | 119.32  | 3.59  |
| 5 | -3 | -4 | 115.20  | 3.52  |
| 5 | -3 | -4 | 113.50  | 2.97  |
| 5 | -3 | -4 | 132.61  | 3.74  |
| 5 | -3 | -4 | 111.55  | 3.44  |
| 5 | -3 | -4 | 104.62  | 2.99  |
| 5 | -3 | -4 | 102.50  | 2.98  |
| 5 | -3 | -4 | 124.39  | 3.48  |
| 5 | -3 | -4 | 102.83  | 3.42  |
| 5 | -3 | -4 | 105.30  | 3.47  |
| 5 | -3 | -4 | 108.10  | 3.85  |
| 5 | -3 | -4 | 113.05  | 2.64  |
| 5 | -3 | -4 | 102.86  | 3.18  |
| 5 | -3 | -3 | 41.10   | 2.07  |
| 5 | -3 | -3 | 45.43   | 1.72  |
| 5 | -3 | -3 | 37.60   | 1.69  |
| 5 | -3 | -3 | 39.17   | 1.88  |
| 5 | -3 | -3 | 43.68   | 2.39  |
| 5 | -3 | -3 | 37.32   | 1.81  |
| 5 | -3 | -2 | 1561.10 | 17.60 |
| 5 | -3 | -2 | 1609.02 | 15.71 |
| 5 | -3 | -2 | 1771.52 | 17.76 |
| 5 | -3 | -2 | 1608.15 | 16.76 |
| 5 | -3 | -2 | 1585.04 | 16.34 |
| 5 | -3 | -2 | 1776.10 | 17.62 |
| 5 | -3 | -2 | 1530.77 | 17.48 |
| 5 | -3 | -2 | 1762.67 | 19.33 |

## CIF 31

|   |    |     |         |       |
|---|----|-----|---------|-------|
| 5 | -3 | -1  | 4145.77 | 37.03 |
| 5 | -3 | -1  | 4546.47 | 39.53 |
| 5 | -3 | -1  | 4363.40 | 38.28 |
| 5 | -3 | -1  | 4332.46 | 38.79 |
| 5 | -3 | -1  | 4599.58 | 38.34 |
| 5 | -3 | -1  | 4251.07 | 39.23 |
| 5 | -3 | 0   | 527.33  | 7.66  |
| 5 | -3 | 0   | 518.83  | 6.95  |
| 5 | -3 | 1   | 7.75    | 0.93  |
| 5 | -3 | 1   | 6.36    | 0.71  |
| 5 | -3 | 1   | 8.14    | 1.13  |
| 5 | -3 | 2   | 111.53  | 3.00  |
| 5 | -3 | 2   | 113.35  | 3.85  |
| 5 | -3 | 3   | 1.47    | 0.61  |
| 5 | -3 | 3   | 1.06    | 0.52  |
| 5 | -3 | 3   | 1.58    | 0.68  |
| 5 | -3 | 4   | 1480.67 | 15.71 |
| 5 | -3 | 5   | 424.52  | 7.57  |
| 5 | -3 | 6   | 652.40  | 10.64 |
| 5 | -3 | 6   | 652.06  | 10.06 |
| 5 | -3 | 7   | 1.72    | 0.74  |
| 5 | -3 | 7   | 0.46    | 0.60  |
| 5 | -2 | -15 | 62.42   | 1.86  |
| 5 | -2 | -14 | 161.46  | 3.49  |
| 5 | -2 | -14 | 150.59  | 5.00  |
| 5 | -2 | -13 | 63.86   | 3.27  |
| 5 | -2 | -13 | 68.80   | 2.69  |
| 5 | -2 | -13 | 68.97   | 3.84  |
| 5 | -2 | -13 | 69.09   | 2.94  |
| 5 | -2 | -12 | 35.76   | 2.73  |
| 5 | -2 | -12 | 36.53   | 2.23  |
| 5 | -2 | -12 | 36.10   | 3.07  |
| 5 | -2 | -12 | 31.39   | 2.20  |
| 5 | -2 | -11 | 202.78  | 6.45  |
| 5 | -2 | -11 | 183.95  | 5.10  |
| 5 | -2 | -11 | 207.35  | 6.92  |
| 5 | -2 | -11 | 176.23  | 6.20  |
| 5 | -2 | -11 | 205.60  | 5.51  |
| 5 | -2 | -11 | 186.98  | 5.46  |
| 5 | -2 | -10 | 957.80  | 15.25 |
| 5 | -2 | -10 | 1104.53 | 16.41 |

## CIF 31

|   |    |     |         |       |
|---|----|-----|---------|-------|
| 5 | -2 | -10 | 938.10  | 13.26 |
| 5 | -2 | -10 | 1132.32 | 17.06 |
| 5 | -2 | -10 | 997.54  | 15.92 |
| 5 | -2 | -10 | 943.32  | 14.38 |
| 5 | -2 | -10 | 1051.82 | 14.32 |
| 5 | -2 | -10 | 968.54  | 14.54 |
| 5 | -2 | -9  | 1040.74 | 16.01 |
| 5 | -2 | -9  | 1209.91 | 17.10 |
| 5 | -2 | -9  | 1134.36 | 15.00 |
| 5 | -2 | -9  | 1100.61 | 15.54 |
| 5 | -2 | -9  | 1190.94 | 17.20 |
| 5 | -2 | -9  | 1113.90 | 16.54 |
| 5 | -2 | -9  | 1037.30 | 16.20 |
| 5 | -2 | -9  | 1064.91 | 15.30 |
| 5 | -2 | -9  | 1292.09 | 15.39 |
| 5 | -2 | -9  | 1174.09 | 16.08 |
| 5 | -2 | -8  | 40.29   | 2.53  |
| 5 | -2 | -8  | 50.23   | 2.95  |
| 5 | -2 | -8  | 36.73   | 2.25  |
| 5 | -2 | -8  | 38.30   | 2.40  |
| 5 | -2 | -8  | 41.08   | 2.42  |
| 5 | -2 | -8  | 41.89   | 2.65  |
| 5 | -2 | -8  | 40.09   | 2.64  |
| 5 | -2 | -8  | 45.16   | 2.57  |
| 5 | -2 | -8  | 39.90   | 2.45  |
| 5 | -2 | -8  | 29.26   | 1.88  |
| 5 | -2 | -8  | 43.08   | 2.60  |
| 5 | -2 | -7  | 505.06  | 8.97  |
| 5 | -2 | -7  | 515.28  | 8.60  |
| 5 | -2 | -7  | 501.90  | 7.76  |
| 5 | -2 | -7  | 516.02  | 8.39  |
| 5 | -2 | -7  | 520.88  | 8.66  |
| 5 | -2 | -7  | 521.11  | 8.92  |
| 5 | -2 | -7  | 497.86  | 8.39  |
| 5 | -2 | -7  | 459.34  | 8.20  |
| 5 | -2 | -7  | 469.22  | 8.74  |
| 5 | -2 | -7  | 517.60  | 8.65  |
| 5 | -2 | -7  | 495.31  | 8.97  |
| 5 | -2 | -7  | 504.02  | 8.85  |
| 5 | -2 | -7  | 513.92  | 9.34  |
| 5 | -2 | -7  | 463.30  | 8.42  |

## CIF 31

|   |    |    |         |       |
|---|----|----|---------|-------|
| 5 | -2 | -7 | 433.25  | 7.30  |
| 5 | -2 | -7 | 512.62  | 9.01  |
| 5 | -2 | -6 | 829.70  | 11.52 |
| 5 | -2 | -6 | 762.00  | 10.55 |
| 5 | -2 | -6 | 784.93  | 10.92 |
| 5 | -2 | -6 | 780.73  | 11.17 |
| 5 | -2 | -6 | 737.77  | 10.97 |
| 5 | -2 | -6 | 748.24  | 10.89 |
| 5 | -2 | -6 | 754.73  | 10.34 |
| 5 | -2 | -6 | 737.11  | 11.02 |
| 5 | -2 | -6 | 776.95  | 10.51 |
| 5 | -2 | -6 | 676.49  | 10.73 |
| 5 | -2 | -6 | 790.99  | 11.25 |
| 5 | -2 | -6 | 809.06  | 11.29 |
| 5 | -2 | -6 | 713.97  | 9.96  |
| 5 | -2 | -6 | 828.43  | 11.58 |
| 5 | -2 | -6 | 862.20  | 12.06 |
| 5 | -2 | -6 | 792.29  | 11.58 |
| 5 | -2 | -6 | 780.83  | 10.84 |
| 5 | -2 | -6 | 755.47  | 11.23 |
| 5 | -2 | -5 | 1060.00 | 13.29 |
| 5 | -2 | -5 | 1009.93 | 12.34 |
| 5 | -2 | -5 | 1008.09 | 13.40 |
| 5 | -2 | -5 | 1125.16 | 13.20 |
| 5 | -2 | -5 | 1015.87 | 12.95 |
| 5 | -2 | -5 | 1044.47 | 12.89 |
| 5 | -2 | -5 | 1045.07 | 13.24 |
| 5 | -2 | -5 | 1038.14 | 12.07 |
| 5 | -2 | -5 | 1051.51 | 12.81 |
| 5 | -2 | -5 | 930.03  | 13.16 |
| 5 | -2 | -5 | 1078.27 | 13.53 |
| 5 | -2 | -5 | 1052.29 | 12.59 |
| 5 | -2 | -5 | 1089.08 | 13.92 |
| 5 | -2 | -5 | 1017.11 | 12.55 |
| 5 | -2 | -4 | 126.23  | 3.23  |
| 5 | -2 | -4 | 129.69  | 3.56  |
| 5 | -2 | -4 | 124.83  | 3.56  |
| 5 | -2 | -4 | 118.74  | 3.39  |
| 5 | -2 | -4 | 127.54  | 3.69  |
| 5 | -2 | -4 | 133.74  | 3.09  |
| 5 | -2 | -4 | 138.49  | 3.52  |

## CIF 31

|   |    |    |         |       |
|---|----|----|---------|-------|
| 5 | -2 | -4 | 133.62  | 3.66  |
| 5 | -2 | -4 | 133.04  | 3.90  |
| 5 | -2 | -4 | 132.44  | 3.57  |
| 5 | -2 | -4 | 129.83  | 3.92  |
| 5 | -2 | -3 | 5624.77 | 49.08 |
| 5 | -2 | -3 | 5573.77 | 50.26 |
| 5 | -2 | -3 | 5637.86 | 48.51 |
| 5 | -2 | -3 | 5661.39 | 49.59 |
| 5 | -2 | -3 | 5481.02 | 48.08 |
| 5 | -2 | -3 | 5655.93 | 50.59 |
| 5 | -2 | -2 | 2262.11 | 21.75 |
| 5 | -2 | -2 | 2163.05 | 20.00 |
| 5 | -2 | -2 | 2118.91 | 20.09 |
| 5 | -2 | -2 | 2170.51 | 20.68 |
| 5 | -2 | -2 | 2015.13 | 21.14 |
| 5 | -2 | -2 | 2010.26 | 18.88 |
| 5 | -2 | -2 | 2101.11 | 21.59 |
| 5 | -2 | -2 | 2187.24 | 22.50 |
| 5 | -2 | -1 | 489.46  | 6.24  |
| 5 | -2 | -1 | 515.79  | 7.44  |
| 5 | -2 | -1 | 479.86  | 6.46  |
| 5 | -2 | -1 | 534.54  | 7.04  |
| 5 | -2 | -1 | 577.49  | 7.82  |
| 5 | -2 | -1 | 463.82  | 7.55  |
| 5 | -2 | -1 | 508.76  | 8.27  |
| 5 | -2 | -1 | 534.06  | 7.85  |
| 5 | -2 | 0  | 62.17   | 1.71  |
| 5 | -2 | 0  | 66.26   | 2.35  |
| 5 | -2 | 0  | 66.12   | 2.13  |
| 5 | -2 | 0  | 60.75   | 2.41  |
| 5 | -2 | 0  | 68.45   | 2.81  |
| 5 | -2 | 0  | 66.54   | 2.47  |
| 5 | -2 | 1  | 1.73    | 0.42  |
| 5 | -2 | 1  | 2.60    | 0.70  |
| 5 | -2 | 1  | 1.80    | 0.61  |
| 5 | -2 | 1  | 3.36    | 0.75  |
| 5 | -2 | 1  | 2.47    | 0.79  |
| 5 | -2 | 2  | 393.39  | 6.34  |
| 5 | -2 | 2  | 358.50  | 6.41  |
| 5 | -2 | 2  | 373.26  | 7.17  |
| 5 | -2 | 2  | 396.77  | 6.69  |

## CIF 31

|   |    |     |        |       |
|---|----|-----|--------|-------|
| 5 | -2 | 3   | 1.74   | 0.63  |
| 5 | -2 | 3   | 3.73   | 0.67  |
| 5 | -2 | 3   | 3.66   | 0.80  |
| 5 | -2 | 3   | 3.29   | 0.79  |
| 5 | -2 | 4   | 2.13   | 0.64  |
| 5 | -2 | 4   | 3.25   | 0.80  |
| 5 | -2 | 5   | 3.38   | 0.69  |
| 5 | -2 | 5   | 3.24   | 0.82  |
| 5 | -2 | 6   | 850.57 | 12.66 |
| 5 | -2 | 6   | 867.59 | 12.26 |
| 5 | -2 | 6   | 893.71 | 12.16 |
| 5 | -2 | 7   | 102.55 | 3.90  |
| 5 | -1 | -15 | 201.55 | 3.85  |
| 5 | -1 | -14 | 91.60  | 3.74  |
| 5 | -1 | -14 | 96.51  | 4.31  |
| 5 | -1 | -14 | 93.41  | 3.15  |
| 5 | -1 | -13 | 1.03   | 1.15  |
| 5 | -1 | -13 | 2.24   | 0.82  |
| 5 | -1 | -13 | 0.90   | 1.30  |
| 5 | -1 | -13 | 0.83   | 0.79  |
| 5 | -1 | -12 | 431.05 | 8.26  |
| 5 | -1 | -12 | 430.30 | 10.51 |
| 5 | -1 | -12 | 417.01 | 8.87  |
| 5 | -1 | -11 | 101.57 | 4.75  |
| 5 | -1 | -11 | 105.25 | 4.86  |
| 5 | -1 | -11 | 100.77 | 4.33  |
| 5 | -1 | -11 | 112.98 | 4.06  |
| 5 | -1 | -10 | 8.35   | 1.58  |
| 5 | -1 | -10 | 5.99   | 1.57  |
| 5 | -1 | -10 | 6.01   | 1.06  |
| 5 | -1 | -10 | 7.94   | 1.44  |
| 5 | -1 | -10 | 6.88   | 1.52  |
| 5 | -1 | -10 | 6.36   | 1.48  |
| 5 | -1 | -10 | 8.31   | 1.47  |
| 5 | -1 | -10 | 8.95   | 1.30  |
| 5 | -1 | -10 | 8.71   | 1.42  |
| 5 | -1 | -9  | 122.68 | 4.65  |
| 5 | -1 | -9  | 132.36 | 4.97  |
| 5 | -1 | -9  | 127.22 | 4.00  |
| 5 | -1 | -9  | 116.77 | 4.08  |
| 5 | -1 | -9  | 119.25 | 4.41  |

## CIF 31

|   |    |    |         |       |
|---|----|----|---------|-------|
| 5 | -1 | -9 | 127.82  | 4.88  |
| 5 | -1 | -9 | 106.74  | 4.44  |
| 5 | -1 | -9 | 117.14  | 4.45  |
| 5 | -1 | -9 | 116.68  | 3.77  |
| 5 | -1 | -9 | 122.11  | 4.47  |
| 5 | -1 | -8 | 36.05   | 2.43  |
| 5 | -1 | -8 | 44.47   | 2.54  |
| 5 | -1 | -8 | 34.93   | 2.00  |
| 5 | -1 | -8 | 37.69   | 2.30  |
| 5 | -1 | -8 | 36.89   | 2.58  |
| 5 | -1 | -8 | 36.03   | 2.15  |
| 5 | -1 | -8 | 35.45   | 2.37  |
| 5 | -1 | -8 | 38.84   | 2.58  |
| 5 | -1 | -8 | 38.23   | 2.47  |
| 5 | -1 | -8 | 40.66   | 2.51  |
| 5 | -1 | -8 | 31.27   | 1.82  |
| 5 | -1 | -8 | 34.58   | 2.34  |
| 5 | -1 | -7 | 1234.22 | 16.95 |
| 5 | -1 | -7 | 1412.75 | 16.89 |
| 5 | -1 | -7 | 1445.45 | 16.77 |
| 5 | -1 | -7 | 1432.02 | 17.15 |
| 5 | -1 | -7 | 1363.72 | 16.34 |
| 5 | -1 | -7 | 1418.40 | 17.46 |
| 5 | -1 | -7 | 1394.31 | 17.71 |
| 5 | -1 | -7 | 1545.25 | 17.67 |
| 5 | -1 | -7 | 1448.20 | 18.12 |
| 5 | -1 | -7 | 1309.14 | 16.95 |
| 5 | -1 | -7 | 1498.80 | 17.58 |
| 5 | -1 | -7 | 1316.91 | 17.31 |
| 5 | -1 | -7 | 1469.77 | 17.78 |
| 5 | -1 | -7 | 1355.58 | 15.71 |
| 5 | -1 | -7 | 1324.08 | 16.47 |
| 5 | -1 | -7 | 1520.94 | 17.93 |
| 5 | -1 | -6 | 529.47  | 8.31  |
| 5 | -1 | -6 | 485.84  | 9.11  |
| 5 | -1 | -6 | 566.62  | 9.36  |
| 5 | -1 | -6 | 492.96  | 8.06  |
| 5 | -1 | -6 | 524.19  | 8.78  |
| 5 | -1 | -6 | 468.25  | 8.09  |
| 5 | -1 | -6 | 512.86  | 8.70  |
| 5 | -1 | -6 | 449.91  | 8.68  |



## CIF 31

|   |    |    |         |       |
|---|----|----|---------|-------|
| 5 | -1 | -6 | 489.98  | 8.21  |
| 5 | -1 | -6 | 529.33  | 8.92  |
| 5 | -1 | -6 | 510.45  | 7.90  |
| 5 | -1 | -6 | 522.66  | 8.62  |
| 5 | -1 | -6 | 562.00  | 9.18  |
| 5 | -1 | -6 | 529.95  | 7.94  |
| 5 | -1 | -6 | 502.73  | 8.02  |
| 5 | -1 | -6 | 530.12  | 8.78  |
| 5 | -1 | -6 | 529.14  | 8.14  |
| 5 | -1 | -6 | 523.48  | 8.78  |
| 5 | -1 | -5 | 303.61  | 6.16  |
| 5 | -1 | -5 | 269.72  | 6.85  |
| 5 | -1 | -5 | 354.67  | 6.14  |
| 5 | -1 | -5 | 363.90  | 6.29  |
| 5 | -1 | -5 | 334.89  | 6.15  |
| 5 | -1 | -5 | 324.57  | 6.01  |
| 5 | -1 | -5 | 310.80  | 5.20  |
| 5 | -1 | -5 | 326.80  | 5.91  |
| 5 | -1 | -5 | 317.20  | 6.60  |
| 5 | -1 | -5 | 332.39  | 5.71  |
| 5 | -1 | -5 | 338.28  | 6.28  |
| 5 | -1 | -5 | 353.91  | 6.83  |
| 5 | -1 | -5 | 344.67  | 6.08  |
| 5 | -1 | -5 | 343.70  | 6.63  |
| 5 | -1 | -5 | 312.38  | 6.29  |
| 5 | -1 | -4 | 1748.63 | 18.69 |
| 5 | -1 | -4 | 1805.57 | 20.65 |
| 5 | -1 | -4 | 1703.03 | 17.98 |
| 5 | -1 | -4 | 1891.73 | 18.79 |
| 5 | -1 | -4 | 1542.51 | 18.46 |
| 5 | -1 | -4 | 1714.41 | 17.86 |
| 5 | -1 | -4 | 1790.23 | 18.62 |
| 5 | -1 | -4 | 1688.48 | 17.44 |
| 5 | -1 | -4 | 1595.18 | 19.08 |
| 5 | -1 | -4 | 1809.90 | 18.78 |
| 5 | -1 | -4 | 1852.54 | 19.62 |
| 5 | -1 | -4 | 1875.52 | 19.25 |
| 5 | -1 | -3 | -0.08   | 0.56  |
| 5 | -1 | -3 | 0.54    | 0.89  |
| 5 | -1 | -3 | 1.41    | 0.62  |
| 5 | -1 | -3 | 1.61    | 0.79  |

## CIF 31

|   |    |    |         |       |
|---|----|----|---------|-------|
| 5 | -1 | -3 | 0.87    | 0.46  |
| 5 | -1 | -3 | 0.55    | 0.51  |
| 5 | -1 | -3 | 0.62    | 0.52  |
| 5 | -1 | -3 | 0.38    | 0.54  |
| 5 | -1 | -2 | 2895.16 | 26.20 |
| 5 | -1 | -2 | 2632.79 | 24.82 |
| 5 | -1 | -2 | 2927.53 | 24.75 |
| 5 | -1 | -2 | 2749.03 | 25.63 |
| 5 | -1 | -2 | 2512.02 | 24.02 |
| 5 | -1 | -2 | 2331.90 | 25.69 |
| 5 | -1 | -1 | 0.36    | 0.56  |
| 5 | -1 | -1 | -0.04   | 0.50  |
| 5 | -1 | -1 | 0.21    | 0.34  |
| 5 | -1 | -1 | 0.92    | 0.50  |
| 5 | -1 | -1 | 0.22    | 0.44  |
| 5 | -1 | -1 | 0.53    | 0.38  |
| 5 | -1 | -1 | 0.25    | 0.54  |
| 5 | -1 | -1 | 0.03    | 0.72  |
| 5 | -1 | -1 | 0.35    | 0.08  |
| 5 | -1 | 0  | 131.73  | 2.92  |
| 5 | -1 | 0  | 132.16  | 3.44  |
| 5 | -1 | 0  | 124.08  | 3.14  |
| 5 | -1 | 0  | 134.45  | 3.61  |
| 5 | -1 | 0  | 126.69  | 2.52  |
| 5 | -1 | 0  | 139.11  | 3.92  |
| 5 | -1 | 0  | 132.30  | 3.40  |
| 5 | -1 | 1  | 17.18   | 1.07  |
| 5 | -1 | 1  | 18.87   | 1.40  |
| 5 | -1 | 1  | 15.09   | 1.25  |
| 5 | -1 | 1  | 18.65   | 0.94  |
| 5 | -1 | 1  | 18.45   | 1.47  |
| 5 | -1 | 1  | 15.57   | 1.39  |
| 5 | -1 | 1  | 14.87   | 1.21  |
| 5 | -1 | 2  | 129.67  | 2.91  |
| 5 | -1 | 2  | 117.49  | 3.41  |
| 5 | -1 | 2  | 122.14  | 2.53  |
| 5 | -1 | 2  | 121.04  | 3.71  |
| 5 | -1 | 2  | 135.06  | 3.75  |
| 5 | -1 | 3  | 1104.81 | 12.17 |
| 5 | -1 | 3  | 1131.15 | 12.23 |
| 5 | -1 | 4  | 905.40  | 12.24 |

## CIF 31

|   |    |     |         |       |
|---|----|-----|---------|-------|
| 5 | -1 | 4   | 874.60  | 10.56 |
| 5 | -1 | 5   | 1852.99 | 21.10 |
| 5 | -1 | 5   | 1872.63 | 19.56 |
| 5 | -1 | 6   | 6.24    | 0.98  |
| 5 | -1 | 6   | 6.70    | 1.14  |
| 5 | 0  | -15 | 41.39   | 2.27  |
| 5 | 0  | -15 | 41.47   | 1.74  |
| 5 | 0  | -14 | 15.84   | 1.83  |
| 5 | 0  | -14 | 14.21   | 1.28  |
| 5 | 0  | -14 | 18.29   | 1.52  |
| 5 | 0  | -13 | 2.38    | 0.88  |
| 5 | 0  | -13 | 2.91    | 1.36  |
| 5 | 0  | -13 | 1.24    | 0.89  |
| 5 | 0  | -13 | 1.56    | 0.98  |
| 5 | 0  | -12 | 696.19  | 13.39 |
| 5 | 0  | -12 | 682.71  | 11.81 |
| 5 | 0  | -12 | 608.98  | 10.54 |
| 5 | 0  | -12 | 699.31  | 13.58 |
| 5 | 0  | -12 | 639.29  | 12.16 |
| 5 | 0  | -12 | 708.19  | 10.97 |
| 5 | 0  | -11 | 58.08   | 3.76  |
| 5 | 0  | -11 | 63.77   | 3.46  |
| 5 | 0  | -11 | 54.70   | 2.84  |
| 5 | 0  | -11 | 63.05   | 3.90  |
| 5 | 0  | -11 | 55.43   | 3.44  |
| 5 | 0  | -11 | 65.58   | 3.04  |
| 5 | 0  | -10 | 111.97  | 4.78  |
| 5 | 0  | -10 | 129.97  | 4.64  |
| 5 | 0  | -10 | 114.98  | 5.01  |
| 5 | 0  | -10 | 106.37  | 3.82  |
| 5 | 0  | -10 | 109.53  | 4.52  |
| 5 | 0  | -10 | 114.90  | 4.89  |
| 5 | 0  | -10 | 117.60  | 4.82  |
| 5 | 0  | -10 | 113.58  | 3.85  |
| 5 | 0  | -9  | 2.31    | 0.88  |
| 5 | 0  | -9  | 0.91    | 1.01  |
| 5 | 0  | -9  | 1.75    | 0.74  |
| 5 | 0  | -9  | 1.64    | 1.09  |
| 5 | 0  | -9  | 1.28    | 0.93  |
| 5 | 0  | -9  | 4.47    | 1.21  |
| 5 | 0  | -9  | 2.89    | 1.25  |

## CIF 31

|   |   |    |         |       |
|---|---|----|---------|-------|
| 5 | 0 | -9 | 4.00    | 1.33  |
| 5 | 0 | -9 | 1.45    | 1.15  |
| 5 | 0 | -9 | 0.92    | 0.73  |
| 5 | 0 | -9 | 2.41    | 1.03  |
| 5 | 0 | -8 | 1232.95 | 15.55 |
| 5 | 0 | -8 | 1178.11 | 15.89 |
| 5 | 0 | -8 | 1237.19 | 14.67 |
| 5 | 0 | -8 | 1205.64 | 16.28 |
| 5 | 0 | -8 | 1205.10 | 15.56 |
| 5 | 0 | -8 | 1263.92 | 16.64 |
| 5 | 0 | -8 | 1030.84 | 16.00 |
| 5 | 0 | -8 | 1142.55 | 15.66 |
| 5 | 0 | -8 | 1157.94 | 16.19 |
| 5 | 0 | -8 | 1157.44 | 16.39 |
| 5 | 0 | -8 | 1160.78 | 14.61 |
| 5 | 0 | -8 | 1157.15 | 16.00 |
| 5 | 0 | -7 | 141.89  | 4.52  |
| 5 | 0 | -7 | 131.01  | 4.15  |
| 5 | 0 | -7 | 150.89  | 4.67  |
| 5 | 0 | -7 | 155.81  | 4.84  |
| 5 | 0 | -7 | 138.50  | 3.93  |
| 5 | 0 | -7 | 161.25  | 4.76  |
| 5 | 0 | -7 | 152.97  | 4.88  |
| 5 | 0 | -7 | 159.49  | 4.71  |
| 5 | 0 | -7 | 155.67  | 4.86  |
| 5 | 0 | -7 | 145.23  | 4.34  |
| 5 | 0 | -7 | 160.63  | 4.17  |
| 5 | 0 | -7 | 144.09  | 4.21  |
| 5 | 0 | -7 | 153.31  | 4.63  |
| 5 | 0 | -7 | 154.61  | 4.77  |
| 5 | 0 | -7 | 149.87  | 4.21  |
| 5 | 0 | -7 | 147.13  | 4.62  |
| 5 | 0 | -6 | 269.55  | 6.03  |
| 5 | 0 | -6 | 318.91  | 7.58  |
| 5 | 0 | -6 | 291.23  | 6.00  |
| 5 | 0 | -6 | 333.43  | 6.86  |
| 5 | 0 | -6 | 273.22  | 5.59  |
| 5 | 0 | -6 | 326.66  | 6.51  |
| 5 | 0 | -6 | 246.68  | 5.89  |
| 5 | 0 | -6 | 286.76  | 6.91  |
| 5 | 0 | -6 | 313.09  | 5.98  |

## CIF 31

|   |   |    |        |      |
|---|---|----|--------|------|
| 5 | 0 | -6 | 314.52 | 6.75 |
| 5 | 0 | -6 | 275.09 | 5.69 |
| 5 | 0 | -6 | 299.27 | 6.13 |
| 5 | 0 | -6 | 308.22 | 6.78 |
| 5 | 0 | -6 | 291.02 | 5.60 |
| 5 | 0 | -6 | 303.50 | 6.26 |
| 5 | 0 | -6 | 321.99 | 6.48 |
| 5 | 0 | -6 | 279.98 | 5.42 |
| 5 | 0 | -5 | 471.58 | 7.72 |
| 5 | 0 | -5 | 408.21 | 8.92 |
| 5 | 0 | -5 | 453.40 | 7.38 |
| 5 | 0 | -5 | 453.70 | 7.28 |
| 5 | 0 | -5 | 435.02 | 7.72 |
| 5 | 0 | -5 | 459.94 | 7.27 |
| 5 | 0 | -5 | 427.82 | 7.01 |
| 5 | 0 | -5 | 523.35 | 8.45 |
| 5 | 0 | -5 | 478.93 | 7.98 |
| 5 | 0 | -5 | 428.27 | 6.83 |
| 5 | 0 | -5 | 474.22 | 8.52 |
| 5 | 0 | -5 | 438.47 | 7.36 |
| 5 | 0 | -5 | 451.72 | 7.18 |
| 5 | 0 | -5 | 464.14 | 7.39 |
| 5 | 0 | -5 | 467.37 | 7.95 |
| 5 | 0 | -5 | 433.64 | 7.77 |
| 5 | 0 | -5 | 462.19 | 8.00 |
| 5 | 0 | -4 | 5.17   | 0.89 |
| 5 | 0 | -4 | 5.03   | 0.91 |
| 5 | 0 | -4 | 3.60   | 1.37 |
| 5 | 0 | -4 | 6.79   | 1.05 |
| 5 | 0 | -4 | 5.84   | 0.98 |
| 5 | 0 | -4 | 6.23   | 1.01 |
| 5 | 0 | -4 | 6.71   | 0.76 |
| 5 | 0 | -4 | 5.32   | 0.84 |
| 5 | 0 | -4 | 5.61   | 0.88 |
| 5 | 0 | -4 | 5.70   | 0.85 |
| 5 | 0 | -4 | 5.41   | 0.89 |
| 5 | 0 | -4 | 4.46   | 0.84 |
| 5 | 0 | -3 | 68.12  | 2.45 |
| 5 | 0 | -3 | 83.72  | 3.54 |
| 5 | 0 | -3 | 75.63  | 2.52 |
| 5 | 0 | -3 | 84.37  | 2.75 |

## CIF 31

|   |   |    |         |       |
|---|---|----|---------|-------|
| 5 | 0 | -3 | 75.01   | 1.99  |
| 5 | 0 | -3 | 71.81   | 2.66  |
| 5 | 0 | -3 | 66.97   | 2.31  |
| 5 | 0 | -3 | 61.92   | 2.75  |
| 5 | 0 | -3 | 80.67   | 2.45  |
| 5 | 0 | -3 | 75.24   | 2.67  |
| 5 | 0 | -3 | 88.18   | 3.07  |
| 5 | 0 | -2 | 215.20  | 4.40  |
| 5 | 0 | -2 | 220.35  | 4.33  |
| 5 | 0 | -2 | 229.62  | 4.65  |
| 5 | 0 | -2 | 199.45  | 3.30  |
| 5 | 0 | -2 | 206.89  | 4.06  |
| 5 | 0 | -2 | 210.53  | 4.98  |
| 5 | 0 | -2 | 225.77  | 4.10  |
| 5 | 0 | -2 | 203.88  | 4.45  |
| 5 | 0 | -1 | 1875.31 | 19.22 |
| 5 | 0 | -1 | 1976.80 | 19.23 |
| 5 | 0 | -1 | 1751.12 | 17.29 |
| 5 | 0 | -1 | 1931.08 | 18.72 |
| 5 | 0 | -1 | 1986.87 | 20.26 |
| 5 | 0 | -1 | 1914.18 | 18.58 |
| 5 | 0 | -1 | 2067.96 | 21.31 |
| 5 | 0 | -1 | 2058.59 | 20.21 |
| 5 | 0 | 0  | 201.69  | 4.08  |
| 5 | 0 | 0  | 194.23  | 3.94  |
| 5 | 0 | 0  | 198.65  | 3.72  |
| 5 | 0 | 0  | 189.13  | 4.39  |
| 5 | 0 | 0  | 196.13  | 4.82  |
| 5 | 0 | 0  | 191.57  | 4.48  |
| 5 | 0 | 1  | 15.02   | 1.16  |
| 5 | 0 | 1  | 11.88   | 1.13  |
| 5 | 0 | 1  | 12.81   | 0.93  |
| 5 | 0 | 1  | 11.67   | 1.01  |
| 5 | 0 | 2  | 12.39   | 1.10  |
| 5 | 0 | 2  | 11.75   | 1.01  |
| 5 | 0 | 2  | 8.59    | 0.98  |
| 5 | 0 | 2  | 11.00   | 0.91  |
| 5 | 0 | 2  | 11.16   | 1.18  |
| 5 | 0 | 2  | 11.41   | 1.23  |
| 5 | 0 | 2  | 10.33   | 0.72  |
| 5 | 0 | 2  | 10.68   | 0.97  |

## CIF 31

|   |   |     |         |       |
|---|---|-----|---------|-------|
| 5 | 0 | 3   | 2.31    | 0.58  |
| 5 | 0 | 3   | 2.29    | 0.58  |
| 5 | 0 | 3   | 1.89    | 0.78  |
| 5 | 0 | 4   | 71.59   | 2.42  |
| 5 | 0 | 4   | 72.79   | 3.12  |
| 5 | 0 | 4   | 75.51   | 2.67  |
| 5 | 0 | 5   | 44.45   | 2.58  |
| 5 | 0 | 6   | 310.37  | 7.00  |
| 5 | 1 | -15 | 6.81    | 1.26  |
| 5 | 1 | -15 | 7.17    | 0.88  |
| 5 | 1 | -14 | 1.72    | 1.31  |
| 5 | 1 | -14 | 1.62    | 1.19  |
| 5 | 1 | -14 | 3.05    | 0.88  |
| 5 | 1 | -13 | 44.22   | 3.25  |
| 5 | 1 | -13 | 44.31   | 2.81  |
| 5 | 1 | -13 | 39.95   | 2.35  |
| 5 | 1 | -13 | 47.02   | 2.95  |
| 5 | 1 | -13 | 39.43   | 3.12  |
| 5 | 1 | -13 | 33.56   | 2.65  |
| 5 | 1 | -13 | 30.93   | 2.09  |
| 5 | 1 | -12 | 23.41   | 2.64  |
| 5 | 1 | -12 | 27.42   | 2.44  |
| 5 | 1 | -12 | 18.47   | 1.77  |
| 5 | 1 | -12 | 23.63   | 2.48  |
| 5 | 1 | -12 | 27.15   | 2.83  |
| 5 | 1 | -12 | 24.32   | 2.50  |
| 5 | 1 | -12 | 29.75   | 2.08  |
| 5 | 1 | -11 | 11.84   | 2.07  |
| 5 | 1 | -11 | 9.93    | 1.36  |
| 5 | 1 | -11 | 8.40    | 1.76  |
| 5 | 1 | -11 | 10.03   | 1.81  |
| 5 | 1 | -11 | 8.16    | 1.71  |
| 5 | 1 | -11 | 5.35    | 1.15  |
| 5 | 1 | -10 | 942.38  | 15.40 |
| 5 | 1 | -10 | 979.09  | 14.45 |
| 5 | 1 | -10 | 926.40  | 13.54 |
| 5 | 1 | -10 | 1013.86 | 15.56 |
| 5 | 1 | -10 | 1024.95 | 14.80 |
| 5 | 1 | -10 | 966.50  | 15.87 |
| 5 | 1 | -10 | 968.64  | 16.09 |
| 5 | 1 | -10 | 987.13  | 15.87 |

## CIF 31

|   |   |     |         |       |
|---|---|-----|---------|-------|
| 5 | 1 | -10 | 1009.35 | 13.26 |
| 5 | 1 | -9  | 51.22   | 3.17  |
| 5 | 1 | -9  | 55.70   | 3.03  |
| 5 | 1 | -9  | 53.11   | 2.90  |
| 5 | 1 | -9  | 54.80   | 3.14  |
| 5 | 1 | -9  | 47.88   | 2.85  |
| 5 | 1 | -9  | 46.39   | 2.96  |
| 5 | 1 | -9  | 53.65   | 3.14  |
| 5 | 1 | -9  | 47.27   | 3.08  |
| 5 | 1 | -9  | 50.05   | 3.21  |
| 5 | 1 | -9  | 46.35   | 2.54  |
| 5 | 1 | -9  | 59.19   | 2.52  |
| 5 | 1 | -8  | 2194.35 | 25.77 |
| 5 | 1 | -8  | 2348.84 | 25.33 |
| 5 | 1 | -8  | 2369.72 | 25.91 |
| 5 | 1 | -8  | 2413.21 | 26.45 |
| 5 | 1 | -8  | 2232.68 | 23.34 |
| 5 | 1 | -8  | 2350.22 | 26.05 |
| 5 | 1 | -8  | 2167.93 | 25.51 |
| 5 | 1 | -8  | 2380.69 | 26.84 |
| 5 | 1 | -8  | 2201.50 | 24.19 |
| 5 | 1 | -8  | 2353.37 | 25.41 |
| 5 | 1 | -8  | 2141.91 | 25.74 |
| 5 | 1 | -8  | 2259.45 | 26.35 |
| 5 | 1 | -8  | 2262.79 | 25.00 |
| 5 | 1 | -7  | 1.72    | 0.89  |
| 5 | 1 | -7  | 3.70    | 1.50  |
| 5 | 1 | -7  | 4.00    | 1.07  |
| 5 | 1 | -7  | 1.55    | 0.69  |
| 5 | 1 | -7  | 1.94    | 0.93  |
| 5 | 1 | -7  | 3.39    | 2.14  |
| 5 | 1 | -7  | 3.52    | 0.97  |
| 5 | 1 | -7  | 2.85    | 1.18  |
| 5 | 1 | -7  | 3.76    | 1.11  |
| 5 | 1 | -7  | 3.05    | 0.93  |
| 5 | 1 | -7  | 2.37    | 1.39  |
| 5 | 1 | -7  | 2.47    | 0.97  |
| 5 | 1 | -7  | 3.90    | 1.06  |
| 5 | 1 | -6  | 3472.34 | 33.18 |
| 5 | 1 | -6  | 3439.70 | 34.80 |
| 5 | 1 | -6  | 2785.63 | 33.04 |



## CIF 31

|   |   |    |         |       |
|---|---|----|---------|-------|
| 5 | 1 | -6 | 3365.47 | 31.81 |
| 5 | 1 | -6 | 3490.48 | 33.66 |
| 5 | 1 | -6 | 3396.69 | 32.72 |
| 5 | 1 | -6 | 3717.68 | 35.75 |
| 5 | 1 | -6 | 3541.19 | 34.23 |
| 5 | 1 | -6 | 2948.49 | 31.23 |
| 5 | 1 | -6 | 3682.24 | 34.71 |
| 5 | 1 | -6 | 3270.81 | 33.22 |
| 5 | 1 | -6 | 3290.31 | 32.56 |
| 5 | 1 | -6 | 3190.26 | 32.48 |
| 5 | 1 | -6 | 3315.10 | 33.43 |
| 5 | 1 | -5 | 491.38  | 7.84  |
| 5 | 1 | -5 | 410.68  | 9.00  |
| 5 | 1 | -5 | 474.56  | 7.76  |
| 5 | 1 | -5 | 445.93  | 7.39  |
| 5 | 1 | -5 | 443.26  | 6.88  |
| 5 | 1 | -5 | 442.47  | 7.90  |
| 5 | 1 | -5 | 477.32  | 8.22  |
| 5 | 1 | -5 | 455.38  | 7.86  |
| 5 | 1 | -5 | 399.08  | 8.71  |
| 5 | 1 | -5 | 416.56  | 7.23  |
| 5 | 1 | -5 | 469.85  | 7.59  |
| 5 | 1 | -5 | 508.60  | 8.69  |
| 5 | 1 | -5 | 411.44  | 8.08  |
| 5 | 1 | -5 | 471.42  | 8.21  |
| 5 | 1 | -4 | 961.38  | 12.30 |
| 5 | 1 | -4 | 863.68  | 14.73 |
| 5 | 1 | -4 | 1056.56 | 12.83 |
| 5 | 1 | -4 | 1040.58 | 13.18 |
| 5 | 1 | -4 | 1083.01 | 12.85 |
| 5 | 1 | -4 | 1098.39 | 12.10 |
| 5 | 1 | -4 | 1001.81 | 13.04 |
| 5 | 1 | -4 | 1013.21 | 12.92 |
| 5 | 1 | -4 | 1048.25 | 14.10 |
| 5 | 1 | -4 | 988.61  | 11.99 |
| 5 | 1 | -4 | 1025.14 | 12.51 |
| 5 | 1 | -4 | 1102.05 | 13.93 |
| 5 | 1 | -4 | 1050.29 | 13.05 |
| 5 | 1 | -4 | 961.35  | 13.24 |
| 5 | 1 | -3 | 146.34  | 3.63  |
| 5 | 1 | -3 | 154.99  | 3.92  |

## CIF 31

|   |   |    |        |      |
|---|---|----|--------|------|
| 5 | 1 | -3 | 162.69 | 3.98 |
| 5 | 1 | -3 | 169.22 | 3.50 |
| 5 | 1 | -3 | 153.26 | 3.93 |
| 5 | 1 | -3 | 147.42 | 4.50 |
| 5 | 1 | -3 | 157.12 | 3.45 |
| 5 | 1 | -3 | 160.17 | 4.39 |
| 5 | 1 | -3 | 149.85 | 3.72 |
| 5 | 1 | -3 | 157.20 | 4.16 |
| 5 | 1 | -3 | 152.94 | 4.01 |
| 5 | 1 | -3 | 164.44 | 4.47 |
| 5 | 1 | -3 | 168.32 | 3.99 |
| 5 | 1 | -2 | 134.98 | 3.27 |
| 5 | 1 | -2 | 139.84 | 4.77 |
| 5 | 1 | -2 | 138.09 | 3.65 |
| 5 | 1 | -2 | 148.14 | 3.66 |
| 5 | 1 | -2 | 141.21 | 3.05 |
| 5 | 1 | -2 | 141.74 | 3.92 |
| 5 | 1 | -2 | 141.77 | 3.50 |
| 5 | 1 | -2 | 144.31 | 4.17 |
| 5 | 1 | -2 | 145.30 | 3.81 |
| 5 | 1 | -1 | 660.55 | 8.48 |
| 5 | 1 | -1 | 668.78 | 9.27 |
| 5 | 1 | -1 | 642.58 | 8.88 |
| 5 | 1 | -1 | 629.12 | 9.64 |
| 5 | 1 | -1 | 683.66 | 8.95 |
| 5 | 1 | -1 | 672.59 | 8.12 |
| 5 | 1 | 0  | 0.63   | 0.38 |
| 5 | 1 | 0  | 0.09   | 0.90 |
| 5 | 1 | 0  | 0.39   | 0.60 |
| 5 | 1 | 0  | 0.22   | 0.42 |
| 5 | 1 | 0  | 0.48   | 0.43 |
| 5 | 1 | 0  | 0.92   | 0.59 |
| 5 | 1 | 0  | 0.34   | 0.58 |
| 5 | 1 | 0  | 0.43   | 0.68 |
| 5 | 1 | 1  | 352.61 | 5.35 |
| 5 | 1 | 1  | 351.45 | 6.22 |
| 5 | 1 | 1  | 342.53 | 6.45 |
| 5 | 1 | 2  | 49.84  | 2.28 |
| 5 | 1 | 2  | 46.36  | 1.78 |
| 5 | 1 | 2  | 46.19  | 2.14 |
| 5 | 1 | 2  | 44.03  | 1.99 |

## CIF 31

|   |   |     |        |       |
|---|---|-----|--------|-------|
| 5 | 1 | 3   | 169.43 | 4.35  |
| 5 | 1 | 3   | 173.41 | 4.17  |
| 5 | 1 | 3   | 175.83 | 5.01  |
| 5 | 1 | 4   | 314.28 | 6.04  |
| 5 | 1 | 4   | 324.26 | 6.45  |
| 5 | 1 | 4   | 333.93 | 7.36  |
| 5 | 1 | 5   | 253.45 | 5.37  |
| 5 | 1 | 5   | 243.62 | 5.61  |
| 5 | 1 | 5   | 244.94 | 6.33  |
| 5 | 2 | -15 | 5.28   | 1.17  |
| 5 | 2 | -15 | 4.51   | 0.70  |
| 5 | 2 | -14 | 10.71  | 1.84  |
| 5 | 2 | -14 | 10.57  | 1.48  |
| 5 | 2 | -14 | 11.70  | 1.73  |
| 5 | 2 | -14 | 12.45  | 1.24  |
| 5 | 2 | -13 | 534.75 | 11.46 |
| 5 | 2 | -13 | 551.11 | 10.78 |
| 5 | 2 | -13 | 522.15 | 10.61 |
| 5 | 2 | -13 | 539.42 | 11.34 |
| 5 | 2 | -13 | 503.65 | 10.68 |
| 5 | 2 | -13 | 562.10 | 8.83  |
| 5 | 2 | -12 | 2.49   | 1.39  |
| 5 | 2 | -12 | 5.37   | 1.56  |
| 5 | 2 | -12 | 2.88   | 1.11  |
| 5 | 2 | -12 | 1.65   | 1.18  |
| 5 | 2 | -12 | 1.50   | 1.26  |
| 5 | 2 | -12 | 2.93   | 0.97  |
| 5 | 2 | -11 | 2.59   | 1.05  |
| 5 | 2 | -11 | 2.30   | 1.16  |
| 5 | 2 | -11 | 3.70   | 1.66  |
| 5 | 2 | -11 | 3.91   | 1.17  |
| 5 | 2 | -11 | 2.78   | 1.38  |
| 5 | 2 | -11 | 3.27   | 1.21  |
| 5 | 2 | -11 | 2.53   | 1.25  |
| 5 | 2 | -11 | 2.67   | 1.35  |
| 5 | 2 | -11 | 2.25   | 0.93  |
| 5 | 2 | -10 | 7.65   | 1.46  |
| 5 | 2 | -10 | 8.53   | 1.47  |
| 5 | 2 | -10 | 6.97   | 1.46  |
| 5 | 2 | -10 | 13.30  | 2.21  |
| 5 | 2 | -10 | 10.09  | 1.71  |

## CIF 31

|   |   |     |        |      |
|---|---|-----|--------|------|
| 5 | 2 | -10 | 9.75   | 1.63 |
| 5 | 2 | -10 | 8.84   | 1.65 |
| 5 | 2 | -10 | 8.86   | 1.82 |
| 5 | 2 | -10 | 13.34  | 2.11 |
| 5 | 2 | -10 | 9.25   | 1.43 |
| 5 | 2 | -10 | 6.62   | 1.08 |
| 5 | 2 | -9  | 35.77  | 2.66 |
| 5 | 2 | -9  | 40.96  | 2.67 |
| 5 | 2 | -9  | 35.77  | 2.61 |
| 5 | 2 | -9  | 34.81  | 2.70 |
| 5 | 2 | -9  | 39.64  | 2.90 |
| 5 | 2 | -9  | 30.24  | 2.49 |
| 5 | 2 | -9  | 36.69  | 2.73 |
| 5 | 2 | -9  | 37.99  | 2.66 |
| 5 | 2 | -9  | 37.89  | 2.32 |
| 5 | 2 | -9  | 35.46  | 2.58 |
| 5 | 2 | -9  | 32.31  | 2.55 |
| 5 | 2 | -9  | 33.81  | 2.77 |
| 5 | 2 | -9  | 35.88  | 2.46 |
| 5 | 2 | -8  | 150.55 | 4.98 |
| 5 | 2 | -8  | 149.29 | 4.80 |
| 5 | 2 | -8  | 150.04 | 5.13 |
| 5 | 2 | -8  | 146.28 | 5.24 |
| 5 | 2 | -8  | 140.23 | 5.08 |
| 5 | 2 | -8  | 141.84 | 5.00 |
| 5 | 2 | -8  | 145.57 | 5.16 |
| 5 | 2 | -8  | 126.34 | 4.53 |
| 5 | 2 | -8  | 143.10 | 4.63 |
| 5 | 2 | -8  | 148.98 | 4.79 |
| 5 | 2 | -8  | 133.10 | 4.69 |
| 5 | 2 | -8  | 142.72 | 4.80 |
| 5 | 2 | -7  | 239.78 | 6.14 |
| 5 | 2 | -7  | 268.15 | 6.86 |
| 5 | 2 | -7  | 254.83 | 6.13 |
| 5 | 2 | -7  | 257.96 | 6.71 |
| 5 | 2 | -7  | 258.49 | 6.65 |
| 5 | 2 | -7  | 241.30 | 5.15 |
| 5 | 2 | -7  | 240.33 | 6.30 |
| 5 | 2 | -7  | 267.94 | 7.07 |
| 5 | 2 | -7  | 259.97 | 6.01 |
| 5 | 2 | -7  | 286.20 | 7.19 |

## CIF 31

|   |   |    |        |       |
|---|---|----|--------|-------|
| 5 | 2 | -7 | 256.99 | 6.00  |
| 5 | 2 | -7 | 275.98 | 6.63  |
| 5 | 2 | -7 | 246.37 | 6.03  |
| 5 | 2 | -7 | 241.39 | 6.02  |
| 5 | 2 | -7 | 266.66 | 6.74  |
| 5 | 2 | -7 | 256.01 | 6.45  |
| 5 | 2 | -6 | 183.28 | 4.86  |
| 5 | 2 | -6 | 211.01 | 6.23  |
| 5 | 2 | -6 | 191.24 | 4.49  |
| 5 | 2 | -6 | 220.74 | 5.04  |
| 5 | 2 | -6 | 204.92 | 5.38  |
| 5 | 2 | -6 | 199.34 | 5.43  |
| 5 | 2 | -6 | 235.49 | 6.37  |
| 5 | 2 | -6 | 180.64 | 5.48  |
| 5 | 2 | -6 | 178.41 | 4.72  |
| 5 | 2 | -6 | 193.36 | 5.09  |
| 5 | 2 | -6 | 200.18 | 5.58  |
| 5 | 2 | -6 | 195.60 | 5.54  |
| 5 | 2 | -5 | 437.88 | 7.45  |
| 5 | 2 | -5 | 390.25 | 8.68  |
| 5 | 2 | -5 | 456.25 | 8.17  |
| 5 | 2 | -5 | 445.52 | 7.32  |
| 5 | 2 | -5 | 452.35 | 7.41  |
| 5 | 2 | -5 | 446.73 | 8.03  |
| 5 | 2 | -5 | 455.86 | 8.66  |
| 5 | 2 | -5 | 408.31 | 8.48  |
| 5 | 2 | -5 | 427.94 | 7.19  |
| 5 | 2 | -5 | 446.81 | 7.85  |
| 5 | 2 | -5 | 458.95 | 8.48  |
| 5 | 2 | -5 | 451.22 | 8.68  |
| 5 | 2 | -4 | 816.64 | 10.50 |
| 5 | 2 | -4 | 776.46 | 11.09 |
| 5 | 2 | -4 | 828.16 | 11.04 |
| 5 | 2 | -4 | 836.06 | 11.37 |
| 5 | 2 | -4 | 792.23 | 10.40 |
| 5 | 2 | -4 | 802.34 | 11.10 |
| 5 | 2 | -4 | 726.03 | 12.73 |
| 5 | 2 | -4 | 849.14 | 12.35 |
| 5 | 2 | -4 | 748.51 | 11.04 |
| 5 | 2 | -4 | 827.10 | 11.81 |
| 5 | 2 | -4 | 816.09 | 12.30 |

## CIF 31

|   |   |    |        |       |
|---|---|----|--------|-------|
| 5 | 2 | -4 | 742.80 | 10.20 |
| 5 | 2 | -3 | 695.34 | 9.17  |
| 5 | 2 | -3 | 601.11 | 12.16 |
| 5 | 2 | -3 | 722.45 | 10.36 |
| 5 | 2 | -3 | 761.66 | 10.38 |
| 5 | 2 | -3 | 837.69 | 12.62 |
| 5 | 2 | -3 | 710.69 | 10.13 |
| 5 | 2 | -3 | 724.24 | 9.82  |
| 5 | 2 | -3 | 745.37 | 9.66  |
| 5 | 2 | -3 | 735.79 | 11.18 |
| 5 | 2 | -3 | 781.13 | 10.96 |
| 5 | 2 | -3 | 667.10 | 9.94  |
| 5 | 2 | -3 | 765.48 | 10.07 |
| 5 | 2 | -2 | 12.45  | 1.86  |
| 5 | 2 | -2 | 17.62  | 1.51  |
| 5 | 2 | -2 | 16.22  | 1.65  |
| 5 | 2 | -2 | 15.75  | 1.51  |
| 5 | 2 | -2 | 17.20  | 1.47  |
| 5 | 2 | -2 | 16.71  | 1.45  |
| 5 | 2 | -2 | 16.52  | 1.23  |
| 5 | 2 | -2 | 15.00  | 1.39  |
| 5 | 2 | -1 | 19.20  | 2.10  |
| 5 | 2 | -1 | 19.84  | 1.63  |
| 5 | 2 | -1 | 18.69  | 1.59  |
| 5 | 2 | -1 | 21.95  | 1.56  |
| 5 | 2 | -1 | 19.02  | 1.50  |
| 5 | 2 | -1 | 24.09  | 1.73  |
| 5 | 2 | -1 | 15.82  | 1.17  |
| 5 | 2 | 0  | 54.85  | 3.35  |
| 5 | 2 | 0  | 74.64  | 2.89  |
| 5 | 2 | 0  | 57.71  | 2.70  |
| 5 | 2 | 0  | 56.33  | 2.38  |
| 5 | 2 | 0  | 70.06  | 2.70  |
| 5 | 2 | 0  | 69.12  | 2.90  |
| 5 | 2 | 0  | 64.22  | 2.28  |
| 5 | 2 | 1  | 31.93  | 1.65  |
| 5 | 2 | 1  | 27.93  | 2.40  |
| 5 | 2 | 1  | 32.87  | 1.97  |
| 5 | 2 | 1  | 31.20  | 1.86  |
| 5 | 2 | 2  | 4.63   | 1.18  |
| 5 | 2 | 2  | 6.28   | 1.13  |

## CIF 31

|   |   |     |        |       |
|---|---|-----|--------|-------|
| 5 | 2 | 2   | 5.21   | 0.83  |
| 5 | 2 | 2   | 5.82   | 1.00  |
| 5 | 2 | 3   | 206.33 | 5.16  |
| 5 | 2 | 3   | 192.23 | 4.80  |
| 5 | 2 | 4   | 145.52 | 4.46  |
| 5 | 2 | 4   | 155.90 | 4.35  |
| 5 | 2 | 4   | 156.10 | 5.11  |
| 5 | 2 | 5   | 379.28 | 7.13  |
| 5 | 2 | 6   | 7.44   | 1.09  |
| 5 | 3 | -15 | 27.99  | 1.69  |
| 5 | 3 | -15 | 22.66  | 1.11  |
| 5 | 3 | -14 | 107.71 | 4.17  |
| 5 | 3 | -14 | 109.48 | 3.08  |
| 5 | 3 | -13 | 454.76 | 10.38 |
| 5 | 3 | -13 | 458.01 | 9.78  |
| 5 | 3 | -13 | 458.45 | 8.68  |
| 5 | 3 | -13 | 418.95 | 9.51  |
| 5 | 3 | -13 | 404.46 | 9.52  |
| 5 | 3 | -13 | 410.96 | 7.23  |
| 5 | 3 | -12 | 262.39 | 7.00  |
| 5 | 3 | -12 | 264.79 | 8.02  |
| 5 | 3 | -12 | 288.88 | 8.08  |
| 5 | 3 | -12 | 272.75 | 6.86  |
| 5 | 3 | -12 | 256.19 | 7.96  |
| 5 | 3 | -12 | 278.46 | 7.24  |
| 5 | 3 | -12 | 263.94 | 7.91  |
| 5 | 3 | -12 | 278.24 | 5.88  |
| 5 | 3 | -11 | 503.76 | 9.72  |
| 5 | 3 | -11 | 522.03 | 10.51 |
| 5 | 3 | -11 | 431.97 | 9.92  |
| 5 | 3 | -11 | 561.61 | 12.53 |
| 5 | 3 | -11 | 544.46 | 10.89 |
| 5 | 3 | -11 | 544.69 | 11.32 |
| 5 | 3 | -11 | 529.92 | 11.56 |
| 5 | 3 | -11 | 502.06 | 9.83  |
| 5 | 3 | -11 | 512.60 | 11.45 |
| 5 | 3 | -11 | 470.50 | 8.22  |
| 5 | 3 | -10 | 803.05 | 12.96 |
| 5 | 3 | -10 | 784.97 | 13.61 |
| 5 | 3 | -10 | 793.87 | 14.40 |
| 5 | 3 | -10 | 838.47 | 15.78 |

## CIF 31

|   |   |     |        |       |
|---|---|-----|--------|-------|
| 5 | 3 | -10 | 821.81 | 14.07 |
| 5 | 3 | -10 | 784.01 | 13.17 |
| 5 | 3 | -10 | 764.59 | 10.83 |
| 5 | 3 | -9  | 739.56 | 12.00 |
| 5 | 3 | -9  | 693.24 | 12.64 |
| 5 | 3 | -9  | 728.20 | 12.95 |
| 5 | 3 | -9  | 711.14 | 13.02 |
| 5 | 3 | -9  | 745.35 | 14.77 |
| 5 | 3 | -9  | 719.20 | 13.06 |
| 5 | 3 | -9  | 672.02 | 11.96 |
| 5 | 3 | -9  | 682.31 | 11.66 |
| 5 | 3 | -9  | 632.09 | 11.75 |
| 5 | 3 | -9  | 714.70 | 13.07 |
| 5 | 3 | -9  | 660.94 | 12.21 |
| 5 | 3 | -8  | 95.16  | 3.97  |
| 5 | 3 | -8  | 110.86 | 4.20  |
| 5 | 3 | -8  | 95.38  | 4.36  |
| 5 | 3 | -8  | 94.74  | 4.28  |
| 5 | 3 | -8  | 106.41 | 5.28  |
| 5 | 3 | -8  | 98.94  | 3.89  |
| 5 | 3 | -8  | 109.37 | 4.36  |
| 5 | 3 | -8  | 104.00 | 4.56  |
| 5 | 3 | -8  | 102.47 | 4.22  |
| 5 | 3 | -8  | 110.04 | 4.00  |
| 5 | 3 | -8  | 109.60 | 4.31  |
| 5 | 3 | -8  | 102.39 | 4.56  |
| 5 | 3 | -8  | 103.77 | 4.40  |
| 5 | 3 | -7  | 127.94 | 4.33  |
| 5 | 3 | -7  | 140.93 | 5.13  |
| 5 | 3 | -7  | 150.36 | 4.80  |
| 5 | 3 | -7  | 152.72 | 5.22  |
| 5 | 3 | -7  | 144.16 | 5.00  |
| 5 | 3 | -7  | 153.07 | 4.68  |
| 5 | 3 | -7  | 135.82 | 4.68  |
| 5 | 3 | -7  | 142.75 | 5.33  |
| 5 | 3 | -7  | 140.71 | 5.05  |
| 5 | 3 | -7  | 143.34 | 4.79  |
| 5 | 3 | -7  | 149.35 | 4.84  |
| 5 | 3 | -7  | 129.05 | 4.22  |
| 5 | 3 | -7  | 152.69 | 5.22  |
| 5 | 3 | -7  | 149.92 | 5.19  |



## CIF 31

|   |   |    |         |       |
|---|---|----|---------|-------|
| 5 | 3 | -6 | 333.37  | 6.80  |
| 5 | 3 | -6 | 346.04  | 7.40  |
| 5 | 3 | -6 | 371.52  | 7.71  |
| 5 | 3 | -6 | 371.34  | 8.18  |
| 5 | 3 | -6 | 343.96  | 6.42  |
| 5 | 3 | -6 | 383.61  | 9.49  |
| 5 | 3 | -6 | 371.47  | 7.22  |
| 5 | 3 | -6 | 344.81  | 7.40  |
| 5 | 3 | -6 | 344.16  | 8.52  |
| 5 | 3 | -6 | 346.21  | 8.19  |
| 5 | 3 | -6 | 350.74  | 7.39  |
| 5 | 3 | -6 | 325.51  | 7.53  |
| 5 | 3 | -6 | 344.59  | 8.02  |
| 5 | 3 | -5 | 663.95  | 9.85  |
| 5 | 3 | -5 | 659.30  | 10.76 |
| 5 | 3 | -5 | 763.81  | 12.13 |
| 5 | 3 | -5 | 701.29  | 10.15 |
| 5 | 3 | -5 | 723.67  | 13.36 |
| 5 | 3 | -5 | 707.58  | 10.50 |
| 5 | 3 | -5 | 695.40  | 10.77 |
| 5 | 3 | -5 | 789.81  | 12.92 |
| 5 | 3 | -5 | 735.82  | 12.50 |
| 5 | 3 | -5 | 760.98  | 11.27 |
| 5 | 3 | -5 | 705.82  | 11.37 |
| 5 | 3 | -5 | 755.48  | 11.13 |
| 5 | 3 | -5 | 711.27  | 12.07 |
| 5 | 3 | -4 | 121.84  | 4.76  |
| 5 | 3 | -4 | 112.63  | 3.57  |
| 5 | 3 | -4 | 121.38  | 4.92  |
| 5 | 3 | -4 | 106.20  | 3.55  |
| 5 | 3 | -4 | 110.98  | 3.56  |
| 5 | 3 | -4 | 114.66  | 4.58  |
| 5 | 3 | -4 | 108.85  | 4.49  |
| 5 | 3 | -4 | 115.93  | 3.89  |
| 5 | 3 | -4 | 120.30  | 3.97  |
| 5 | 3 | -4 | 112.68  | 3.36  |
| 5 | 3 | -3 | 944.07  | 15.65 |
| 5 | 3 | -3 | 993.77  | 15.52 |
| 5 | 3 | -3 | 1019.23 | 15.23 |
| 5 | 3 | -3 | 1038.98 | 14.09 |
| 5 | 3 | -3 | 1055.77 | 13.00 |

## CIF 31

|   |   |    |         |       |
|---|---|----|---------|-------|
| 5 | 3 | -3 | 1008.60 | 13.41 |
| 5 | 3 | -3 | 1072.28 | 13.70 |
| 5 | 3 | -3 | 1005.09 | 15.03 |
| 5 | 3 | -3 | 995.95  | 12.73 |
| 5 | 3 | -2 | 913.51  | 15.69 |
| 5 | 3 | -2 | 1199.26 | 14.71 |
| 5 | 3 | -2 | 988.20  | 15.31 |
| 5 | 3 | -2 | 899.00  | 14.80 |
| 5 | 3 | -2 | 1149.62 | 14.58 |
| 5 | 3 | -2 | 1070.82 | 13.61 |
| 5 | 3 | -2 | 1123.38 | 14.18 |
| 5 | 3 | -2 | 1069.86 | 15.36 |
| 5 | 3 | -2 | 1144.06 | 13.55 |
| 5 | 3 | -2 | 1261.82 | 14.47 |
| 5 | 3 | -1 | 890.16  | 15.33 |
| 5 | 3 | -1 | 1076.99 | 14.24 |
| 5 | 3 | -1 | 925.58  | 15.03 |
| 5 | 3 | -1 | 1189.13 | 14.46 |
| 5 | 3 | -1 | 1146.55 | 14.46 |
| 5 | 3 | -1 | 1169.86 | 15.76 |
| 5 | 3 | -1 | 1223.16 | 14.73 |
| 5 | 3 | -1 | 1085.48 | 13.29 |
| 5 | 3 | 0  | 31.20   | 2.65  |
| 5 | 3 | 0  | 31.27   | 2.15  |
| 5 | 3 | 0  | 28.18   | 2.24  |
| 5 | 3 | 0  | 29.47   | 1.97  |
| 5 | 3 | 0  | 32.59   | 2.27  |
| 5 | 3 | 0  | 26.01   | 1.72  |
| 5 | 3 | 1  | 297.86  | 6.45  |
| 5 | 3 | 1  | 271.12  | 6.04  |
| 5 | 3 | 1  | 260.03  | 6.42  |
| 5 | 3 | 1  | 294.98  | 5.79  |
| 5 | 3 | 2  | 50.41   | 2.35  |
| 5 | 3 | 2  | 46.81   | 2.62  |
| 5 | 3 | 2  | 54.85   | 2.67  |
| 5 | 3 | 3  | 12.20   | 1.50  |
| 5 | 3 | 3  | 11.38   | 1.51  |
| 5 | 3 | 3  | 12.92   | 1.48  |
| 5 | 3 | 4  | 691.15  | 10.86 |
| 5 | 3 | 4  | 659.89  | 10.45 |
| 5 | 3 | 5  | 6.58    | 1.14  |

## CIF 31

|   |   |     |        |       |
|---|---|-----|--------|-------|
| 5 | 3 | 5   | 8.34   | 1.16  |
| 5 | 3 | 6   | 332.11 | 6.47  |
| 5 | 4 | -15 | 86.69  | 2.95  |
| 5 | 4 | -14 | 17.11  | 1.93  |
| 5 | 4 | -14 | 18.10  | 1.87  |
| 5 | 4 | -14 | 16.61  | 1.10  |
| 5 | 4 | -13 | 281.28 | 7.67  |
| 5 | 4 | -13 | 312.09 | 7.92  |
| 5 | 4 | -13 | 298.99 | 6.63  |
| 5 | 4 | -13 | 285.46 | 6.80  |
| 5 | 4 | -13 | 256.59 | 7.20  |
| 5 | 4 | -13 | 254.69 | 5.05  |
| 5 | 4 | -12 | 5.29   | 1.28  |
| 5 | 4 | -12 | 5.35   | 1.18  |
| 5 | 4 | -12 | 5.89   | 1.60  |
| 5 | 4 | -12 | 6.17   | 1.70  |
| 5 | 4 | -12 | 5.47   | 1.38  |
| 5 | 4 | -12 | 5.89   | 1.69  |
| 5 | 4 | -12 | 4.65   | 1.39  |
| 5 | 4 | -12 | 4.73   | 0.94  |
| 5 | 4 | -11 | 5.92   | 1.38  |
| 5 | 4 | -11 | 4.98   | 1.23  |
| 5 | 4 | -11 | 5.83   | 1.54  |
| 5 | 4 | -11 | 9.48   | 1.97  |
| 5 | 4 | -11 | 7.09   | 1.60  |
| 5 | 4 | -11 | 6.60   | 2.01  |
| 5 | 4 | -11 | 5.91   | 1.54  |
| 5 | 4 | -11 | 6.48   | 1.65  |
| 5 | 4 | -11 | 5.79   | 1.33  |
| 5 | 4 | -11 | 4.03   | 0.91  |
| 5 | 4 | -10 | 114.15 | 4.37  |
| 5 | 4 | -10 | 99.98  | 4.56  |
| 5 | 4 | -10 | 97.41  | 5.32  |
| 5 | 4 | -10 | 109.27 | 4.91  |
| 5 | 4 | -10 | 101.13 | 4.24  |
| 5 | 4 | -10 | 103.83 | 4.93  |
| 5 | 4 | -10 | 103.81 | 4.54  |
| 5 | 4 | -9  | 852.48 | 13.24 |
| 5 | 4 | -9  | 854.80 | 14.47 |
| 5 | 4 | -9  | 716.96 | 13.56 |
| 5 | 4 | -9  | 869.83 | 16.54 |

## CIF 31

|   |   |    |        |       |
|---|---|----|--------|-------|
| 5 | 4 | -9 | 835.75 | 12.82 |
| 5 | 4 | -9 | 851.97 | 14.62 |
| 5 | 4 | -9 | 810.40 | 13.59 |
| 5 | 4 | -9 | 799.73 | 12.53 |
| 5 | 4 | -9 | 752.24 | 14.18 |
| 5 | 4 | -9 | 814.92 | 14.11 |
| 5 | 4 | -8 | 74.80  | 3.52  |
| 5 | 4 | -8 | 79.60  | 3.65  |
| 5 | 4 | -8 | 73.55  | 3.97  |
| 5 | 4 | -8 | 59.84  | 3.39  |
| 5 | 4 | -8 | 72.80  | 3.59  |
| 5 | 4 | -8 | 70.86  | 4.01  |
| 5 | 4 | -8 | 74.61  | 3.93  |
| 5 | 4 | -8 | 70.81  | 3.74  |
| 5 | 4 | -8 | 72.63  | 3.55  |
| 5 | 4 | -8 | 65.88  | 3.74  |
| 5 | 4 | -8 | 70.14  | 3.87  |
| 5 | 4 | -7 | 328.77 | 7.47  |
| 5 | 4 | -7 | 319.80 | 7.89  |
| 5 | 4 | -7 | 280.27 | 7.02  |
| 5 | 4 | -7 | 313.64 | 9.26  |
| 5 | 4 | -7 | 324.52 | 7.26  |
| 5 | 4 | -7 | 278.06 | 6.91  |
| 5 | 4 | -7 | 290.36 | 7.80  |
| 5 | 4 | -7 | 300.39 | 7.49  |
| 5 | 4 | -7 | 294.27 | 7.26  |
| 5 | 4 | -7 | 291.32 | 7.59  |
| 5 | 4 | -7 | 283.09 | 7.78  |
| 5 | 4 | -6 | 64.09  | 3.57  |
| 5 | 4 | -6 | 61.00  | 3.19  |
| 5 | 4 | -6 | 62.40  | 3.35  |
| 5 | 4 | -6 | 61.67  | 2.60  |
| 5 | 4 | -6 | 67.17  | 4.23  |
| 5 | 4 | -6 | 64.34  | 3.12  |
| 5 | 4 | -6 | 54.99  | 2.85  |
| 5 | 4 | -6 | 57.14  | 3.65  |
| 5 | 4 | -6 | 60.07  | 3.56  |
| 5 | 4 | -6 | 61.13  | 3.47  |
| 5 | 4 | -6 | 59.18  | 3.21  |
| 5 | 4 | -6 | 56.54  | 3.16  |
| 5 | 4 | -6 | 61.51  | 3.58  |

## CIF 31

|   |   |    |        |      |
|---|---|----|--------|------|
| 5 | 4 | -5 | 152.83 | 5.46 |
| 5 | 4 | -5 | 147.59 | 4.80 |
| 5 | 4 | -5 | 152.25 | 5.13 |
| 5 | 4 | -5 | 133.42 | 4.03 |
| 5 | 4 | -5 | 141.54 | 5.85 |
| 5 | 4 | -5 | 130.35 | 4.15 |
| 5 | 4 | -5 | 141.88 | 4.51 |
| 5 | 4 | -5 | 159.81 | 5.93 |
| 5 | 4 | -5 | 148.75 | 5.31 |
| 5 | 4 | -5 | 148.08 | 5.39 |
| 5 | 4 | -5 | 156.07 | 5.70 |
| 5 | 4 | -5 | 142.02 | 4.73 |
| 5 | 4 | -5 | 138.02 | 4.61 |
| 5 | 4 | -4 | 25.73  | 2.38 |
| 5 | 4 | -4 | 28.88  | 2.28 |
| 5 | 4 | -4 | 25.86  | 2.24 |
| 5 | 4 | -4 | 22.43  | 2.45 |
| 5 | 4 | -4 | 19.50  | 2.93 |
| 5 | 4 | -4 | 32.80  | 2.15 |
| 5 | 4 | -4 | 30.38  | 2.48 |
| 5 | 4 | -4 | 28.83  | 2.22 |
| 5 | 4 | -4 | 25.43  | 1.93 |
| 5 | 4 | -4 | 26.05  | 2.35 |
| 5 | 4 | -3 | 6.39   | 1.49 |
| 5 | 4 | -3 | 6.09   | 1.36 |
| 5 | 4 | -3 | 4.54   | 1.02 |
| 5 | 4 | -3 | 4.79   | 1.38 |
| 5 | 4 | -3 | 6.28   | 1.34 |
| 5 | 4 | -3 | 4.40   | 1.62 |
| 5 | 4 | -3 | 5.86   | 1.30 |
| 5 | 4 | -3 | 8.67   | 1.54 |
| 5 | 4 | -3 | 6.35   | 1.02 |
| 5 | 4 | -2 | 246.17 | 6.73 |
| 5 | 4 | -2 | 205.87 | 5.56 |
| 5 | 4 | -2 | 239.36 | 6.36 |
| 5 | 4 | -2 | 218.90 | 6.79 |
| 5 | 4 | -2 | 233.29 | 5.90 |
| 5 | 4 | -2 | 221.30 | 6.33 |
| 5 | 4 | -2 | 208.20 | 5.27 |
| 5 | 4 | -2 | 226.61 | 5.46 |
| 5 | 4 | -1 | 87.75  | 3.89 |

## CIF 31

|   |   |     |        |      |
|---|---|-----|--------|------|
| 5 | 4 | -1  | 93.49  | 3.74 |
| 5 | 4 | -1  | 96.65  | 3.84 |
| 5 | 4 | -1  | 79.21  | 4.02 |
| 5 | 4 | -1  | 90.36  | 3.74 |
| 5 | 4 | -1  | 80.85  | 3.68 |
| 5 | 4 | -1  | 92.64  | 3.60 |
| 5 | 4 | -1  | 99.20  | 3.49 |
| 5 | 4 | 0   | 385.29 | 8.10 |
| 5 | 4 | 0   | 344.41 | 7.59 |
| 5 | 4 | 0   | 370.54 | 8.75 |
| 5 | 4 | 0   | 370.04 | 7.64 |
| 5 | 4 | 0   | 363.30 | 7.96 |
| 5 | 4 | 0   | 392.93 | 8.06 |
| 5 | 4 | 0   | 374.26 | 7.23 |
| 5 | 4 | 1   | 15.14  | 1.73 |
| 5 | 4 | 1   | 6.34   | 1.41 |
| 5 | 4 | 1   | 11.50  | 1.50 |
| 5 | 4 | 1   | 6.81   | 1.17 |
| 5 | 4 | 1   | 12.08  | 1.35 |
| 5 | 4 | 2   | 1.13   | 0.74 |
| 5 | 4 | 2   | 1.95   | 1.01 |
| 5 | 4 | 2   | 0.92   | 1.00 |
| 5 | 4 | 2   | 1.30   | 0.92 |
| 5 | 4 | 3   | 1.01   | 0.87 |
| 5 | 4 | 3   | -0.05  | 0.79 |
| 5 | 4 | 3   | -0.20  | 0.81 |
| 5 | 4 | 4   | 2.24   | 0.94 |
| 5 | 4 | 4   | 1.37   | 0.80 |
| 5 | 4 | 5   | 12.89  | 1.38 |
| 5 | 4 | 5   | 14.38  | 1.71 |
| 5 | 4 | 6   | 176.81 | 5.02 |
| 5 | 5 | -15 | 21.61  | 1.42 |
| 5 | 5 | -14 | 0.76   | 0.94 |
| 5 | 5 | -14 | 1.46   | 0.72 |
| 5 | 5 | -13 | 227.03 | 6.44 |
| 5 | 5 | -13 | 220.89 | 5.38 |
| 5 | 5 | -13 | 224.44 | 5.89 |
| 5 | 5 | -12 | 1.03   | 0.93 |
| 5 | 5 | -12 | 2.24   | 1.23 |
| 5 | 5 | -12 | 1.67   | 1.13 |
| 5 | 5 | -12 | 1.19   | 1.28 |

## CIF 31

|   |   |     |        |       |
|---|---|-----|--------|-------|
| 5 | 5 | -12 | 1.66   | 1.15  |
| 5 | 5 | -12 | 0.28   | 0.85  |
| 5 | 5 | -12 | 1.88   | 1.41  |
| 5 | 5 | -11 | 12.13  | 1.50  |
| 5 | 5 | -11 | 10.80  | 1.76  |
| 5 | 5 | -11 | 8.51   | 1.62  |
| 5 | 5 | -11 | 8.89   | 1.73  |
| 5 | 5 | -11 | 12.25  | 1.98  |
| 5 | 5 | -11 | 9.32   | 1.46  |
| 5 | 5 | -11 | 8.90   | 1.68  |
| 5 | 5 | -11 | 13.22  | 1.82  |
| 5 | 5 | -10 | 176.09 | 5.35  |
| 5 | 5 | -10 | 162.11 | 5.88  |
| 5 | 5 | -10 | 146.28 | 5.49  |
| 5 | 5 | -10 | 166.79 | 6.38  |
| 5 | 5 | -10 | 151.72 | 6.60  |
| 5 | 5 | -10 | 166.84 | 5.00  |
| 5 | 5 | -10 | 168.10 | 6.12  |
| 5 | 5 | -10 | 157.72 | 5.45  |
| 5 | 5 | -10 | 172.51 | 5.57  |
| 5 | 5 | -10 | 159.49 | 6.05  |
| 5 | 5 | -10 | 160.69 | 5.81  |
| 5 | 5 | -9  | 563.98 | 10.31 |
| 5 | 5 | -9  | 594.41 | 10.61 |
| 5 | 5 | -9  | 556.93 | 11.53 |
| 5 | 5 | -9  | 481.38 | 10.21 |
| 5 | 5 | -9  | 491.76 | 12.49 |
| 5 | 5 | -9  | 581.11 | 10.64 |
| 5 | 5 | -9  | 592.62 | 12.11 |
| 5 | 5 | -9  | 562.28 | 11.17 |
| 5 | 5 | -9  | 567.01 | 10.50 |
| 5 | 5 | -9  | 609.12 | 11.13 |
| 5 | 5 | -9  | 583.67 | 11.75 |
| 5 | 5 | -9  | 564.81 | 11.72 |
| 5 | 5 | -8  | 53.67  | 3.19  |
| 5 | 5 | -8  | 53.99  | 3.06  |
| 5 | 5 | -8  | 50.38  | 2.86  |
| 5 | 5 | -8  | 52.70  | 3.18  |
| 5 | 5 | -8  | 53.79  | 3.45  |
| 5 | 5 | -8  | 50.10  | 3.09  |
| 5 | 5 | -8  | 53.22  | 3.38  |

## CIF 31

|   |   |    |         |       |
|---|---|----|---------|-------|
| 5 | 5 | -8 | 55.05   | 3.52  |
| 5 | 5 | -7 | 1448.81 | 19.64 |
| 5 | 5 | -7 | 1522.53 | 18.91 |
| 5 | 5 | -7 | 1400.70 | 20.11 |
| 5 | 5 | -7 | 1287.22 | 21.71 |
| 5 | 5 | -7 | 1388.82 | 18.49 |
| 5 | 5 | -7 | 1396.25 | 18.89 |
| 5 | 5 | -7 | 1463.09 | 19.89 |
| 5 | 5 | -7 | 1426.02 | 20.55 |
| 5 | 5 | -7 | 1383.30 | 19.16 |
| 5 | 5 | -7 | 1382.31 | 20.17 |
| 5 | 5 | -7 | 1412.77 | 19.80 |
| 5 | 5 | -7 | 1249.32 | 18.50 |
| 5 | 5 | -7 | 1317.58 | 19.65 |
| 5 | 5 | -6 | 1638.99 | 21.75 |
| 5 | 5 | -6 | 1569.72 | 20.22 |
| 5 | 5 | -6 | 1556.51 | 23.59 |
| 5 | 5 | -6 | 1560.01 | 19.97 |
| 5 | 5 | -6 | 1613.67 | 22.14 |
| 5 | 5 | -6 | 1559.01 | 20.66 |
| 5 | 5 | -6 | 1629.75 | 22.22 |
| 5 | 5 | -6 | 1594.03 | 21.81 |
| 5 | 5 | -6 | 1596.22 | 20.21 |
| 5 | 5 | -6 | 1542.89 | 19.76 |
| 5 | 5 | -5 | 224.48  | 6.69  |
| 5 | 5 | -5 | 237.24  | 6.31  |
| 5 | 5 | -5 | 218.46  | 6.18  |
| 5 | 5 | -5 | 216.94  | 5.91  |
| 5 | 5 | -5 | 207.89  | 6.64  |
| 5 | 5 | -5 | 229.09  | 7.08  |
| 5 | 5 | -5 | 230.94  | 6.34  |
| 5 | 5 | -5 | 203.70  | 5.60  |
| 5 | 5 | -5 | 214.58  | 6.67  |
| 5 | 5 | -4 | 49.01   | 3.10  |
| 5 | 5 | -4 | 52.53   | 3.03  |
| 5 | 5 | -4 | 50.15   | 2.86  |
| 5 | 5 | -4 | 51.51   | 2.64  |
| 5 | 5 | -4 | 53.83   | 3.47  |
| 5 | 5 | -4 | 47.52   | 2.75  |
| 5 | 5 | -4 | 53.14   | 3.58  |
| 5 | 5 | -4 | 45.74   | 3.40  |



## CIF 31

|   |   |    |        |      |
|---|---|----|--------|------|
| 5 | 5 | -4 | 54.58  | 3.08 |
| 5 | 5 | -4 | 54.84  | 3.34 |
| 5 | 5 | -3 | 70.38  | 3.55 |
| 5 | 5 | -3 | 73.61  | 3.51 |
| 5 | 5 | -3 | 66.63  | 3.10 |
| 5 | 5 | -3 | 74.25  | 4.00 |
| 5 | 5 | -3 | 79.45  | 4.17 |
| 5 | 5 | -3 | 73.46  | 3.32 |
| 5 | 5 | -3 | 77.14  | 3.63 |
| 5 | 5 | -3 | 73.06  | 3.78 |
| 5 | 5 | -2 | 156.84 | 5.11 |
| 5 | 5 | -2 | 162.00 | 5.49 |
| 5 | 5 | -2 | 156.00 | 5.99 |
| 5 | 5 | -2 | 163.05 | 5.95 |
| 5 | 5 | -2 | 182.29 | 5.42 |
| 5 | 5 | -2 | 175.62 | 5.09 |
| 5 | 5 | -2 | 154.88 | 5.40 |
| 5 | 5 | -1 | 2.15   | 0.96 |
| 5 | 5 | -1 | 1.10   | 1.14 |
| 5 | 5 | -1 | 1.42   | 1.26 |
| 5 | 5 | -1 | 2.10   | 1.19 |
| 5 | 5 | -1 | 1.14   | 0.98 |
| 5 | 5 | -1 | 1.51   | 0.95 |
| 5 | 5 | -1 | 1.26   | 0.81 |
| 5 | 5 | 0  | 95.24  | 3.98 |
| 5 | 5 | 0  | 101.05 | 4.58 |
| 5 | 5 | 0  | 105.60 | 4.50 |
| 5 | 5 | 0  | 110.10 | 4.16 |
| 5 | 5 | 0  | 89.89  | 3.71 |
| 5 | 5 | 0  | 102.94 | 3.82 |
| 5 | 5 | 1  | 82.88  | 3.60 |
| 5 | 5 | 1  | 62.92  | 3.56 |
| 5 | 5 | 1  | 62.52  | 3.33 |
| 5 | 5 | 1  | 81.69  | 3.58 |
| 5 | 5 | 1  | 84.31  | 3.34 |
| 5 | 5 | 2  | 163.66 | 5.01 |
| 5 | 5 | 2  | 155.64 | 4.82 |
| 5 | 5 | 3  | 22.69  | 1.93 |
| 5 | 5 | 3  | 23.14  | 1.84 |
| 5 | 5 | 3  | 20.51  | 2.28 |
| 5 | 5 | 4  | 133.47 | 4.79 |

## CIF 31

|   |   |     |        |      |
|---|---|-----|--------|------|
| 5 | 5 | 5   | 220.12 | 5.79 |
| 5 | 6 | -14 | 109.74 | 3.49 |
| 5 | 6 | -14 | 85.21  | 2.67 |
| 5 | 6 | -13 | 44.20  | 2.26 |
| 5 | 6 | -13 | 44.95  | 2.50 |
| 5 | 6 | -12 | 3.26   | 1.39 |
| 5 | 6 | -12 | 2.01   | 1.03 |
| 5 | 6 | -12 | 3.01   | 1.27 |
| 5 | 6 | -12 | 1.47   | 0.89 |
| 5 | 6 | -11 | 32.14  | 2.53 |
| 5 | 6 | -11 | 26.34  | 2.05 |
| 5 | 6 | -11 | 31.02  | 2.71 |
| 5 | 6 | -11 | 28.57  | 2.53 |
| 5 | 6 | -11 | 31.85  | 2.70 |
| 5 | 6 | -11 | 30.44  | 2.28 |
| 5 | 6 | -11 | 31.88  | 2.50 |
| 5 | 6 | -10 | 108.15 | 3.88 |
| 5 | 6 | -10 | 108.17 | 3.94 |
| 5 | 6 | -10 | 89.61  | 4.37 |
| 5 | 6 | -10 | 115.28 | 4.97 |
| 5 | 6 | -10 | 104.70 | 4.02 |
| 5 | 6 | -10 | 109.52 | 4.89 |
| 5 | 6 | -10 | 96.91  | 4.29 |
| 5 | 6 | -10 | 113.07 | 4.33 |
| 5 | 6 | -10 | 95.68  | 4.32 |
| 5 | 6 | -10 | 108.18 | 4.70 |
| 5 | 6 | -9  | 127.76 | 4.62 |
| 5 | 6 | -9  | 128.69 | 4.50 |
| 5 | 6 | -9  | 124.00 | 5.11 |
| 5 | 6 | -9  | 136.12 | 4.84 |
| 5 | 6 | -9  | 137.03 | 5.30 |
| 5 | 6 | -9  | 135.97 | 4.87 |
| 5 | 6 | -9  | 134.44 | 4.82 |
| 5 | 6 | -9  | 126.33 | 4.95 |
| 5 | 6 | -9  | 137.53 | 5.44 |
| 5 | 6 | -8  | 22.50  | 2.27 |
| 5 | 6 | -8  | 17.47  | 1.88 |
| 5 | 6 | -8  | 19.71  | 2.15 |
| 5 | 6 | -8  | 17.56  | 1.87 |
| 5 | 6 | -8  | 21.20  | 1.98 |
| 5 | 6 | -8  | 21.07  | 2.21 |

## CIF 31

|   |   |    |        |       |
|---|---|----|--------|-------|
| 5 | 6 | -8 | 21.22  | 2.49  |
| 5 | 6 | -8 | 21.27  | 2.34  |
| 5 | 6 | -8 | 19.79  | 2.18  |
| 5 | 6 | -8 | 17.94  | 2.01  |
| 5 | 6 | -8 | 17.86  | 1.94  |
| 5 | 6 | -8 | 20.51  | 2.36  |
| 5 | 6 | -7 | 5.56   | 1.62  |
| 5 | 6 | -7 | 4.93   | 1.35  |
| 5 | 6 | -7 | 5.34   | 1.35  |
| 5 | 6 | -7 | 8.91   | 1.47  |
| 5 | 6 | -7 | 2.39   | 1.20  |
| 5 | 6 | -7 | 3.16   | 1.21  |
| 5 | 6 | -7 | 5.32   | 1.56  |
| 5 | 6 | -7 | 5.18   | 1.59  |
| 5 | 6 | -7 | 3.45   | 1.41  |
| 5 | 6 | -7 | 1.77   | 1.28  |
| 5 | 6 | -7 | 3.67   | 1.09  |
| 5 | 6 | -7 | 4.33   | 1.34  |
| 5 | 6 | -6 | 23.25  | 2.50  |
| 5 | 6 | -6 | 20.17  | 2.20  |
| 5 | 6 | -6 | 20.80  | 2.06  |
| 5 | 6 | -6 | 20.02  | 1.99  |
| 5 | 6 | -6 | 21.84  | 2.33  |
| 5 | 6 | -6 | 18.45  | 2.33  |
| 5 | 6 | -6 | 23.08  | 2.39  |
| 5 | 6 | -6 | 20.17  | 2.44  |
| 5 | 6 | -6 | 17.52  | 2.17  |
| 5 | 6 | -6 | 21.84  | 2.34  |
| 5 | 6 | -5 | 226.27 | 7.08  |
| 5 | 6 | -5 | 222.49 | 6.65  |
| 5 | 6 | -5 | 226.14 | 6.24  |
| 5 | 6 | -5 | 243.80 | 7.27  |
| 5 | 6 | -5 | 226.06 | 6.24  |
| 5 | 6 | -5 | 211.04 | 6.62  |
| 5 | 6 | -5 | 220.32 | 7.21  |
| 5 | 6 | -5 | 208.23 | 6.72  |
| 5 | 6 | -5 | 211.53 | 6.42  |
| 5 | 6 | -4 | 846.96 | 13.86 |
| 5 | 6 | -4 | 896.65 | 13.72 |
| 5 | 6 | -4 | 898.95 | 14.62 |
| 5 | 6 | -4 | 932.66 | 13.89 |

## CIF 31

|   |   |    |        |       |
|---|---|----|--------|-------|
| 5 | 6 | -4 | 891.30 | 15.38 |
| 5 | 6 | -4 | 917.48 | 14.17 |
| 5 | 6 | -4 | 831.91 | 14.37 |
| 5 | 6 | -4 | 896.73 | 14.94 |
| 5 | 6 | -3 | 51.55  | 2.93  |
| 5 | 6 | -3 | 63.75  | 3.35  |
| 5 | 6 | -3 | 61.62  | 2.94  |
| 5 | 6 | -3 | 50.50  | 3.09  |
| 5 | 6 | -3 | 60.70  | 3.13  |
| 5 | 6 | -3 | 56.68  | 3.59  |
| 5 | 6 | -3 | 59.59  | 3.81  |
| 5 | 6 | -3 | 59.29  | 3.27  |
| 5 | 6 | -3 | 57.44  | 3.35  |
| 5 | 6 | -3 | 60.33  | 3.68  |
| 5 | 6 | -2 | 448.84 | 9.07  |
| 5 | 6 | -2 | 427.10 | 8.64  |
| 5 | 6 | -2 | 438.64 | 9.73  |
| 5 | 6 | -2 | 438.65 | 10.13 |
| 5 | 6 | -2 | 413.66 | 8.41  |
| 5 | 6 | -2 | 437.93 | 8.93  |
| 5 | 6 | -2 | 401.36 | 8.82  |
| 5 | 6 | -2 | 429.25 | 10.21 |
| 5 | 6 | -1 | 212.88 | 6.08  |
| 5 | 6 | -1 | 196.77 | 6.17  |
| 5 | 6 | -1 | 225.25 | 6.82  |
| 5 | 6 | -1 | 234.38 | 6.32  |
| 5 | 6 | -1 | 228.93 | 5.91  |
| 5 | 6 | -1 | 205.71 | 7.03  |
| 5 | 6 | 0  | 76.99  | 3.69  |
| 5 | 6 | 0  | 70.43  | 3.38  |
| 5 | 6 | 0  | 73.05  | 3.79  |
| 5 | 6 | 0  | 72.94  | 3.44  |
| 5 | 6 | 0  | 72.24  | 3.15  |
| 5 | 6 | 0  | 68.32  | 4.03  |
| 5 | 6 | 1  | 8.36   | 1.41  |
| 5 | 6 | 1  | 5.04   | 1.21  |
| 5 | 6 | 1  | 7.48   | 1.57  |
| 5 | 6 | 1  | 6.81   | 1.29  |
| 5 | 6 | 1  | 6.87   | 1.31  |
| 5 | 6 | 1  | 7.97   | 1.29  |
| 5 | 6 | 1  | 5.85   | 1.55  |

## CIF 31

|   |   |     |         |       |
|---|---|-----|---------|-------|
| 5 | 6 | 2   | 150.29  | 4.59  |
| 5 | 6 | 2   | 164.75  | 4.78  |
| 5 | 6 | 2   | 163.08  | 5.14  |
| 5 | 6 | 2   | 150.64  | 5.47  |
| 5 | 6 | 3   | 42.98   | 2.26  |
| 5 | 6 | 3   | 46.34   | 2.83  |
| 5 | 6 | 4   | 115.27  | 3.33  |
| 5 | 7 | -13 | 22.51   | 1.64  |
| 5 | 7 | -13 | 22.89   | 1.60  |
| 5 | 7 | -12 | 55.95   | 2.79  |
| 5 | 7 | -12 | 56.01   | 2.63  |
| 5 | 7 | -12 | 56.77   | 2.87  |
| 5 | 7 | -11 | 265.70  | 6.55  |
| 5 | 7 | -11 | 255.65  | 6.53  |
| 5 | 7 | -11 | 261.09  | 6.16  |
| 5 | 7 | -11 | 269.12  | 6.65  |
| 5 | 7 | -10 | 443.20  | 7.85  |
| 5 | 7 | -10 | 406.33  | 8.76  |
| 5 | 7 | -10 | 448.16  | 9.20  |
| 5 | 7 | -10 | 428.01  | 7.94  |
| 5 | 7 | -10 | 420.35  | 8.69  |
| 5 | 7 | -10 | 444.10  | 9.36  |
| 5 | 7 | -9  | 186.72  | 5.38  |
| 5 | 7 | -9  | 184.70  | 5.84  |
| 5 | 7 | -9  | 160.50  | 5.38  |
| 5 | 7 | -9  | 167.25  | 5.40  |
| 5 | 7 | -9  | 174.77  | 5.87  |
| 5 | 7 | -9  | 173.69  | 5.76  |
| 5 | 7 | -9  | 170.87  | 5.78  |
| 5 | 7 | -8  | 1121.14 | 15.78 |
| 5 | 7 | -8  | 1048.36 | 14.35 |
| 5 | 7 | -8  | 973.93  | 15.47 |
| 5 | 7 | -8  | 972.40  | 15.06 |
| 5 | 7 | -8  | 1036.32 | 14.54 |
| 5 | 7 | -8  | 1119.40 | 15.87 |
| 5 | 7 | -8  | 1088.75 | 16.29 |
| 5 | 7 | -8  | 1003.46 | 16.06 |
| 5 | 7 | -8  | 1098.21 | 15.86 |
| 5 | 7 | -8  | 1043.51 | 15.13 |
| 5 | 7 | -7  | 4.41    | 1.49  |
| 5 | 7 | -7  | 3.59    | 1.20  |

## CIF 31

|   |   |    |        |      |
|---|---|----|--------|------|
| 5 | 7 | -7 | 3.83   | 1.07 |
| 5 | 7 | -7 | 1.31   | 0.97 |
| 5 | 7 | -7 | 1.90   | 1.15 |
| 5 | 7 | -7 | 4.94   | 1.29 |
| 5 | 7 | -7 | 4.96   | 1.45 |
| 5 | 7 | -7 | 2.92   | 1.40 |
| 5 | 7 | -7 | 5.36   | 1.50 |
| 5 | 7 | -7 | 2.64   | 1.35 |
| 5 | 7 | -7 | 6.62   | 1.33 |
| 5 | 7 | -7 | 2.69   | 1.22 |
| 5 | 7 | -6 | 41.43  | 3.04 |
| 5 | 7 | -6 | 37.11  | 2.48 |
| 5 | 7 | -6 | 30.58  | 2.42 |
| 5 | 7 | -6 | 32.40  | 2.68 |
| 5 | 7 | -6 | 36.90  | 2.53 |
| 5 | 7 | -6 | 36.68  | 2.80 |
| 5 | 7 | -6 | 37.83  | 2.90 |
| 5 | 7 | -6 | 33.58  | 2.60 |
| 5 | 7 | -6 | 36.45  | 2.89 |
| 5 | 7 | -6 | 35.16  | 2.54 |
| 5 | 7 | -6 | 33.31  | 2.69 |
| 5 | 7 | -5 | 107.06 | 4.85 |
| 5 | 7 | -5 | 92.10  | 3.86 |
| 5 | 7 | -5 | 106.91 | 4.15 |
| 5 | 7 | -5 | 98.59  | 4.54 |
| 5 | 7 | -5 | 113.52 | 4.79 |
| 5 | 7 | -5 | 117.00 | 4.32 |
| 5 | 7 | -5 | 98.50  | 4.20 |
| 5 | 7 | -5 | 98.80  | 4.61 |
| 5 | 7 | -5 | 112.17 | 4.86 |
| 5 | 7 | -5 | 93.67  | 4.31 |
| 5 | 7 | -5 | 98.93  | 4.24 |
| 5 | 7 | -4 | 152.52 | 4.96 |
| 5 | 7 | -4 | 163.57 | 5.84 |
| 5 | 7 | -4 | 171.50 | 5.87 |
| 5 | 7 | -4 | 157.05 | 5.09 |
| 5 | 7 | -4 | 156.69 | 4.99 |
| 5 | 7 | -4 | 156.12 | 5.64 |
| 5 | 7 | -4 | 149.86 | 5.26 |
| 5 | 7 | -4 | 154.53 | 5.51 |
| 5 | 7 | -3 | 64.19  | 3.74 |

## CIF 31

|   |   |     |       |      |
|---|---|-----|-------|------|
| 5 | 7 | -3  | 63.65 | 3.22 |
| 5 | 7 | -3  | 59.30 | 3.68 |
| 5 | 7 | -3  | 60.23 | 3.49 |
| 5 | 7 | -3  | 55.01 | 3.29 |
| 5 | 7 | -3  | 63.56 | 3.69 |
| 5 | 7 | -3  | 56.52 | 3.11 |
| 5 | 7 | -3  | 48.16 | 2.85 |
| 5 | 7 | -3  | 57.28 | 3.56 |
| 5 | 7 | -2  | 11.41 | 1.90 |
| 5 | 7 | -2  | 12.89 | 1.59 |
| 5 | 7 | -2  | 11.82 | 1.76 |
| 5 | 7 | -2  | 13.01 | 1.67 |
| 5 | 7 | -2  | 13.46 | 1.79 |
| 5 | 7 | -2  | 13.33 | 1.62 |
| 5 | 7 | -2  | 10.75 | 1.86 |
| 5 | 7 | -1  | 8.87  | 1.58 |
| 5 | 7 | -1  | 8.84  | 1.33 |
| 5 | 7 | -1  | 8.01  | 1.59 |
| 5 | 7 | -1  | 8.21  | 1.43 |
| 5 | 7 | -1  | 7.01  | 1.20 |
| 5 | 7 | -1  | 8.40  | 1.48 |
| 5 | 7 | -1  | 9.94  | 1.72 |
| 5 | 7 | 0   | 52.92 | 2.88 |
| 5 | 7 | 0   | 45.37 | 2.69 |
| 5 | 7 | 0   | 48.78 | 2.98 |
| 5 | 7 | 0   | 48.54 | 2.60 |
| 5 | 7 | 0   | 48.84 | 2.71 |
| 5 | 7 | 0   | 47.46 | 3.13 |
| 5 | 7 | 1   | 40.93 | 2.23 |
| 5 | 7 | 1   | 45.65 | 2.58 |
| 5 | 7 | 1   | 39.30 | 2.69 |
| 5 | 7 | 1   | 39.34 | 2.66 |
| 5 | 7 | 2   | 70.90 | 3.05 |
| 5 | 7 | 2   | 60.53 | 2.48 |
| 5 | 7 | 3   | 28.14 | 1.52 |
| 5 | 8 | -12 | 2.70  | 0.68 |
| 5 | 8 | -11 | 45.50 | 2.05 |
| 5 | 8 | -11 | 54.60 | 2.56 |
| 5 | 8 | -10 | 6.27  | 1.02 |
| 5 | 8 | -10 | 9.34  | 1.38 |
| 5 | 8 | -10 | 8.49  | 1.22 |

## CIF 31

|   |   |    |        |       |
|---|---|----|--------|-------|
| 5 | 8 | -9 | 9.87   | 1.32  |
| 5 | 8 | -9 | 8.58   | 1.10  |
| 5 | 8 | -9 | 8.46   | 1.34  |
| 5 | 8 | -9 | 8.75   | 1.40  |
| 5 | 8 | -9 | 8.70   | 1.38  |
| 5 | 8 | -9 | 7.86   | 1.34  |
| 5 | 8 | -8 | 413.44 | 7.95  |
| 5 | 8 | -8 | 388.08 | 8.09  |
| 5 | 8 | -8 | 358.45 | 6.87  |
| 5 | 8 | -8 | 377.56 | 7.80  |
| 5 | 8 | -8 | 338.12 | 7.95  |
| 5 | 8 | -8 | 375.41 | 8.10  |
| 5 | 8 | -7 | 95.87  | 3.92  |
| 5 | 8 | -7 | 95.67  | 3.62  |
| 5 | 8 | -7 | 100.87 | 4.30  |
| 5 | 8 | -7 | 91.01  | 3.59  |
| 5 | 8 | -7 | 91.42  | 3.92  |
| 5 | 8 | -7 | 89.77  | 3.68  |
| 5 | 8 | -7 | 91.35  | 3.92  |
| 5 | 8 | -6 | 432.44 | 8.83  |
| 5 | 8 | -6 | 403.99 | 8.33  |
| 5 | 8 | -6 | 411.82 | 9.17  |
| 5 | 8 | -6 | 424.40 | 8.55  |
| 5 | 8 | -6 | 451.28 | 8.90  |
| 5 | 8 | -6 | 383.68 | 7.72  |
| 5 | 8 | -6 | 392.00 | 8.65  |
| 5 | 8 | -6 | 439.08 | 9.04  |
| 5 | 8 | -6 | 384.59 | 8.34  |
| 5 | 8 | -5 | 2.58   | 1.30  |
| 5 | 8 | -5 | 2.03   | 1.20  |
| 5 | 8 | -5 | 0.96   | 0.79  |
| 5 | 8 | -5 | 1.24   | 0.98  |
| 5 | 8 | -5 | 1.52   | 0.92  |
| 5 | 8 | -4 | 707.41 | 11.73 |
| 5 | 8 | -4 | 702.50 | 11.96 |
| 5 | 8 | -4 | 710.98 | 12.34 |
| 5 | 8 | -4 | 721.51 | 11.99 |
| 5 | 8 | -4 | 697.76 | 11.53 |
| 5 | 8 | -4 | 704.79 | 11.81 |
| 5 | 8 | -3 | 2.58   | 1.20  |
| 5 | 8 | -3 | 0.64   | 1.22  |



## CIF 31

|   |   |     |        |      |
|---|---|-----|--------|------|
| 5 | 8 | -3  | 2.23   | 1.31 |
| 5 | 8 | -3  | 3.89   | 1.17 |
| 5 | 8 | -3  | 2.25   | 1.08 |
| 5 | 8 | -3  | 1.68   | 0.84 |
| 5 | 8 | -3  | 1.26   | 0.85 |
| 5 | 8 | -3  | 1.37   | 0.95 |
| 5 | 8 | -2  | 42.66  | 2.52 |
| 5 | 8 | -2  | 43.06  | 2.78 |
| 5 | 8 | -2  | 40.01  | 2.60 |
| 5 | 8 | -2  | 43.03  | 2.67 |
| 5 | 8 | -2  | 40.96  | 2.36 |
| 5 | 8 | -2  | 38.55  | 2.36 |
| 5 | 8 | -2  | 37.91  | 2.41 |
| 5 | 8 | -2  | 39.20  | 2.55 |
| 5 | 8 | -1  | 12.83  | 1.42 |
| 5 | 8 | -1  | 14.08  | 1.74 |
| 5 | 8 | -1  | 12.43  | 1.44 |
| 5 | 8 | -1  | 16.12  | 1.62 |
| 5 | 8 | -1  | 12.42  | 1.25 |
| 5 | 8 | -1  | 13.68  | 1.56 |
| 5 | 8 | 0   | 27.54  | 1.98 |
| 5 | 8 | 0   | 25.17  | 1.71 |
| 5 | 8 | 1   | 120.65 | 3.35 |
| 5 | 9 | -10 | 4.98   | 0.78 |
| 5 | 9 | -9  | 34.05  | 1.62 |
| 5 | 9 | -9  | 30.10  | 1.49 |
| 5 | 9 | -8  | 0.37   | 0.70 |
| 5 | 9 | -8  | 0.53   | 0.49 |
| 5 | 9 | -7  | 192.13 | 4.45 |
| 5 | 9 | -7  | 187.48 | 4.62 |
| 5 | 9 | -6  | 18.94  | 1.60 |
| 5 | 9 | -6  | 19.10  | 1.54 |
| 5 | 9 | -6  | 19.87  | 1.76 |
| 5 | 9 | -6  | 16.28  | 1.43 |
| 5 | 9 | -5  | 84.55  | 3.12 |
| 5 | 9 | -5  | 92.13  | 3.20 |
| 5 | 9 | -4  | 29.18  | 1.83 |
| 5 | 9 | -4  | 25.97  | 1.56 |
| 5 | 9 | -4  | 29.13  | 1.95 |
| 5 | 9 | -4  | 31.18  | 2.03 |
| 5 | 9 | -4  | 28.09  | 1.82 |

## CIF 31

|   |     |    |        |      |
|---|-----|----|--------|------|
| 5 | 9   | -3 | 11.77  | 1.16 |
| 5 | 9   | -3 | 11.40  | 1.13 |
| 5 | 9   | -3 | 10.90  | 1.32 |
| 5 | 9   | -3 | 9.56   | 1.16 |
| 5 | 9   | -2 | 22.14  | 1.26 |
| 5 | 9   | -2 | 19.31  | 1.24 |
| 5 | 9   | -1 | 0.48   | 0.54 |
| 5 | 9   | -1 | 0.70   | 0.56 |
| 6 | -13 | -1 | 79.19  | 2.11 |
| 6 | -13 | -1 | 79.99  | 2.17 |
| 6 | -13 | 0  | 3.94   | 0.62 |
| 6 | -13 | 0  | 3.94   | 0.66 |
| 6 | -13 | 1  | 87.84  | 2.54 |
| 6 | -13 | 1  | 84.89  | 2.48 |
| 6 | -13 | 2  | 36.41  | 1.63 |
| 6 | -13 | 2  | 35.19  | 1.59 |
| 6 | -13 | 3  | 0.89   | 0.45 |
| 6 | -13 | 3  | 0.47   | 0.43 |
| 6 | -13 | 4  | 54.07  | 1.51 |
| 6 | -12 | -4 | 188.90 | 3.05 |
| 6 | -12 | -4 | 211.94 | 4.03 |
| 6 | -12 | -3 | 4.65   | 0.64 |
| 6 | -12 | -3 | 3.42   | 0.70 |
| 6 | -12 | -3 | 5.62   | 0.89 |
| 6 | -12 | -3 | 3.98   | 0.78 |
| 6 | -12 | -2 | 112.70 | 3.25 |
| 6 | -12 | -2 | 121.66 | 3.53 |
| 6 | -12 | -2 | 115.34 | 3.43 |
| 6 | -12 | -2 | 117.28 | 2.86 |
| 6 | -12 | -1 | 115.33 | 3.41 |
| 6 | -12 | -1 | 127.26 | 3.84 |
| 6 | -12 | -1 | 119.04 | 3.64 |
| 6 | -12 | -1 | 121.81 | 3.70 |
| 6 | -12 | 0  | 6.04   | 0.98 |
| 6 | -12 | 0  | 6.48   | 1.07 |
| 6 | -12 | 0  | 7.09   | 1.06 |
| 6 | -12 | 1  | 446.90 | 7.63 |
| 6 | -12 | 1  | 448.07 | 7.83 |
| 6 | -12 | 2  | 5.56   | 1.09 |
| 6 | -12 | 2  | 5.54   | 1.00 |
| 6 | -12 | 2  | 7.47   | 1.11 |

## CIF 31

|   |     |    |        |      |
|---|-----|----|--------|------|
| 6 | -12 | 2  | 5.92   | 0.89 |
| 6 | -12 | 2  | 6.09   | 0.93 |
| 6 | -12 | 2  | 6.07   | 0.87 |
| 6 | -12 | 3  | 69.83  | 2.79 |
| 6 | -12 | 3  | 71.87  | 2.65 |
| 6 | -12 | 3  | 59.08  | 2.62 |
| 6 | -12 | 3  | 57.02  | 2.32 |
| 6 | -12 | 3  | 60.52  | 2.28 |
| 6 | -12 | 3  | 75.93  | 2.59 |
| 6 | -12 | 3  | 58.34  | 2.24 |
| 6 | -12 | 4  | 182.69 | 4.35 |
| 6 | -12 | 4  | 175.35 | 4.10 |
| 6 | -12 | 4  | 160.25 | 4.24 |
| 6 | -12 | 4  | 144.58 | 3.74 |
| 6 | -12 | 4  | 158.96 | 3.53 |
| 6 | -12 | 4  | 188.95 | 3.90 |
| 6 | -12 | 4  | 153.07 | 3.62 |
| 6 | -12 | 5  | 3.39   | 0.85 |
| 6 | -12 | 5  | 2.94   | 0.61 |
| 6 | -12 | 5  | 2.69   | 0.77 |
| 6 | -12 | 5  | 2.77   | 0.72 |
| 6 | -12 | 5  | 2.86   | 0.74 |
| 6 | -12 | 6  | 54.14  | 2.09 |
| 6 | -12 | 6  | 51.03  | 1.95 |
| 6 | -12 | 6  | 49.75  | 1.92 |
| 6 | -12 | 7  | 4.53   | 0.72 |
| 6 | -12 | 7  | 3.87   | 0.63 |
| 6 | -12 | 7  | 2.60   | 0.51 |
| 6 | -11 | -6 | 19.71  | 1.21 |
| 6 | -11 | -6 | 21.10  | 1.40 |
| 6 | -11 | -6 | 17.21  | 1.10 |
| 6 | -11 | -5 | 23.90  | 1.56 |
| 6 | -11 | -5 | 26.37  | 1.77 |
| 6 | -11 | -5 | 26.50  | 1.71 |
| 6 | -11 | -5 | 24.86  | 1.69 |
| 6 | -11 | -4 | 24.37  | 1.73 |
| 6 | -11 | -4 | 26.39  | 1.89 |
| 6 | -11 | -4 | 25.62  | 1.82 |
| 6 | -11 | -4 | 25.60  | 1.87 |
| 6 | -11 | -3 | 185.57 | 4.87 |
| 6 | -11 | -3 | 200.54 | 5.33 |

## CIF 31

|   |     |    |        |      |
|---|-----|----|--------|------|
| 6 | -11 | -3 | 180.65 | 4.98 |
| 6 | -11 | -3 | 168.89 | 4.94 |
| 6 | -11 | -3 | 187.38 | 4.38 |
| 6 | -11 | -3 | 193.45 | 4.25 |
| 6 | -11 | -2 | 254.36 | 6.07 |
| 6 | -11 | -2 | 292.83 | 6.76 |
| 6 | -11 | -2 | 277.70 | 6.44 |
| 6 | -11 | -2 | 266.90 | 6.41 |
| 6 | -11 | -2 | 253.01 | 5.70 |
| 6 | -11 | -2 | 271.92 | 5.67 |
| 6 | -11 | -2 | 304.51 | 5.93 |
| 6 | -11 | -1 | 99.45  | 3.89 |
| 6 | -11 | -1 | 97.29  | 3.54 |
| 6 | -11 | -1 | 103.01 | 3.50 |
| 6 | -11 | -1 | 102.15 | 3.48 |
| 6 | -11 | 0  | 115.25 | 4.18 |
| 6 | -11 | 0  | 112.60 | 3.93 |
| 6 | -11 | 0  | 106.23 | 4.02 |
| 6 | -11 | 0  | 100.50 | 3.65 |
| 6 | -11 | 0  | 109.03 | 3.73 |
| 6 | -11 | 1  | 330.36 | 6.29 |
| 6 | -11 | 1  | 341.22 | 7.10 |
| 6 | -11 | 1  | 323.12 | 6.97 |
| 6 | -11 | 1  | 327.41 | 6.72 |
| 6 | -11 | 1  | 327.59 | 6.76 |
| 6 | -11 | 2  | 143.94 | 4.62 |
| 6 | -11 | 2  | 142.11 | 4.50 |
| 6 | -11 | 2  | 148.31 | 4.57 |
| 6 | -11 | 2  | 134.39 | 4.35 |
| 6 | -11 | 2  | 138.02 | 4.11 |
| 6 | -11 | 2  | 131.17 | 4.28 |
| 6 | -11 | 3  | 97.47  | 3.73 |
| 6 | -11 | 3  | 92.30  | 3.64 |
| 6 | -11 | 3  | 104.16 | 3.77 |
| 6 | -11 | 3  | 97.70  | 3.72 |
| 6 | -11 | 3  | 98.93  | 3.38 |
| 6 | -11 | 3  | 94.21  | 3.59 |
| 6 | -11 | 3  | 94.97  | 3.37 |
| 6 | -11 | 4  | 1.18   | 0.80 |
| 6 | -11 | 4  | 4.59   | 1.00 |
| 6 | -11 | 4  | 0.94   | 1.17 |

## CIF 31

|       |    |       |      |
|-------|----|-------|------|
| 6 -11 | 4  | 2.30  | 0.94 |
| 6 -11 | 4  | 1.44  | 0.81 |
| 6 -11 | 4  | 1.99  | 0.79 |
| 6 -11 | 4  | 2.63  | 0.79 |
| 6 -11 | 5  | 43.30 | 2.19 |
| 6 -11 | 5  | 48.03 | 2.61 |
| 6 -11 | 5  | 46.04 | 2.42 |
| 6 -11 | 5  | 40.98 | 2.37 |
| 6 -11 | 5  | 44.74 | 2.41 |
| 6 -11 | 5  | 38.56 | 2.14 |
| 6 -11 | 5  | 42.74 | 1.97 |
| 6 -11 | 5  | 43.57 | 1.99 |
| 6 -11 | 6  | 13.76 | 1.28 |
| 6 -11 | 6  | 14.68 | 1.67 |
| 6 -11 | 6  | 13.48 | 1.36 |
| 6 -11 | 6  | 10.41 | 1.26 |
| 6 -11 | 6  | 9.83  | 1.26 |
| 6 -11 | 6  | 8.26  | 1.05 |
| 6 -11 | 6  | 17.12 | 1.07 |
| 6 -11 | 7  | 58.97 | 2.16 |
| 6 -11 | 7  | 63.49 | 2.63 |
| 6 -11 | 7  | 57.65 | 2.36 |
| 6 -11 | 7  | 62.78 | 2.48 |
| 6 -11 | 7  | 57.50 | 2.42 |
| 6 -11 | 7  | 57.06 | 2.44 |
| 6 -11 | 8  | 1.07  | 0.62 |
| 6 -11 | 8  | 1.04  | 0.45 |
| 6 -11 | 8  | 1.01  | 0.94 |
| 6 -11 | 8  | 1.77  | 0.60 |
| 6 -11 | 8  | 1.34  | 0.55 |
| 6 -11 | 9  | 19.24 | 1.05 |
| 6 -11 | 9  | 19.26 | 1.12 |
| 6 -10 | -8 | 63.42 | 2.01 |
| 6 -10 | -8 | 56.24 | 1.94 |
| 6 -10 | -7 | 4.60  | 0.98 |
| 6 -10 | -7 | 6.71  | 0.95 |
| 6 -10 | -7 | 4.46  | 0.77 |
| 6 -10 | -6 | 3.93  | 0.95 |
| 6 -10 | -6 | 2.71  | 0.95 |
| 6 -10 | -6 | 3.30  | 0.92 |
| 6 -10 | -6 | 2.46  | 0.86 |

## CIF 31

|   |     |    |       |      |
|---|-----|----|-------|------|
| 6 | -10 | -6 | 3.47  | 0.90 |
| 6 | -10 | -5 | 29.89 | 2.08 |
| 6 | -10 | -5 | 33.31 | 2.37 |
| 6 | -10 | -5 | 31.07 | 2.20 |
| 6 | -10 | -5 | 29.25 | 2.17 |
| 6 | -10 | -5 | 29.43 | 1.96 |
| 6 | -10 | -5 | 29.76 | 1.95 |
| 6 | -10 | -5 | 29.36 | 1.90 |
| 6 | -10 | -4 | 4.13  | 0.90 |
| 6 | -10 | -4 | 2.24  | 1.01 |
| 6 | -10 | -4 | 1.58  | 1.21 |
| 6 | -10 | -4 | 1.98  | 1.05 |
| 6 | -10 | -4 | 4.69  | 1.19 |
| 6 | -10 | -4 | 3.23  | 0.96 |
| 6 | -10 | -4 | 1.98  | 0.86 |
| 6 | -10 | -4 | 1.49  | 0.77 |
| 6 | -10 | -3 | 83.28 | 3.62 |
| 6 | -10 | -3 | 88.64 | 3.96 |
| 6 | -10 | -3 | 88.82 | 3.84 |
| 6 | -10 | -3 | 93.16 | 3.70 |
| 6 | -10 | -3 | 89.16 | 3.53 |
| 6 | -10 | -3 | 89.01 | 3.26 |
| 6 | -10 | -3 | 92.83 | 3.35 |
| 6 | -10 | -2 | 1.05  | 0.87 |
| 6 | -10 | -2 | 0.71  | 0.70 |
| 6 | -10 | -2 | 1.06  | 0.88 |
| 6 | -10 | -2 | 0.56  | 0.62 |
| 6 | -10 | -2 | 0.08  | 0.86 |
| 6 | -10 | -2 | 0.91  | 0.70 |
| 6 | -10 | -1 | 23.54 | 1.91 |
| 6 | -10 | -1 | 26.91 | 2.06 |
| 6 | -10 | -1 | 24.76 | 1.90 |
| 6 | -10 | -1 | 28.00 | 2.28 |
| 6 | -10 | -1 | 29.27 | 2.23 |
| 6 | -10 | -1 | 29.98 | 2.19 |
| 6 | -10 | -1 | 30.02 | 2.20 |
| 6 | -10 | -1 | 24.02 | 1.61 |
| 6 | -10 | 0  | 4.70  | 1.26 |
| 6 | -10 | 0  | 1.01  | 2.05 |
| 6 | -10 | 0  | 2.60  | 1.26 |
| 6 | -10 | 0  | 2.56  | 1.04 |

## CIF 31

|   |     |   |        |       |
|---|-----|---|--------|-------|
| 6 | -10 | 0 | 4.39   | 1.10  |
| 6 | -10 | 0 | 2.12   | 1.05  |
| 6 | -10 | 0 | 1.76   | 0.92  |
| 6 | -10 | 0 | 1.89   | 1.09  |
| 6 | -10 | 1 | 76.68  | 3.57  |
| 6 | -10 | 1 | 79.14  | 3.69  |
| 6 | -10 | 1 | 77.08  | 3.58  |
| 6 | -10 | 1 | 72.28  | 3.57  |
| 6 | -10 | 1 | 70.02  | 3.21  |
| 6 | -10 | 1 | 80.10  | 3.80  |
| 6 | -10 | 1 | 76.65  | 3.31  |
| 6 | -10 | 1 | 71.80  | 3.52  |
| 6 | -10 | 2 | 800.95 | 12.98 |
| 6 | -10 | 2 | 922.56 | 12.73 |
| 6 | -10 | 2 | 854.91 | 12.53 |
| 6 | -10 | 2 | 822.94 | 13.03 |
| 6 | -10 | 2 | 868.69 | 13.18 |
| 6 | -10 | 2 | 818.15 | 13.24 |
| 6 | -10 | 2 | 808.49 | 13.11 |
| 6 | -10 | 2 | 774.28 | 12.36 |
| 6 | -10 | 2 | 859.46 | 13.79 |
| 6 | -10 | 2 | 814.67 | 12.06 |
| 6 | -10 | 3 | 1.23   | 1.80  |
| 6 | -10 | 3 | 0.53   | 0.91  |
| 6 | -10 | 3 | -0.40  | 0.91  |
| 6 | -10 | 3 | -0.13  | 1.41  |
| 6 | -10 | 3 | 0.55   | 1.06  |
| 6 | -10 | 3 | 1.09   | 0.98  |
| 6 | -10 | 3 | 0.63   | 0.99  |
| 6 | -10 | 3 | 0.27   | 0.75  |
| 6 | -10 | 3 | 1.60   | 0.89  |
| 6 | -10 | 3 | 0.32   | 0.91  |
| 6 | -10 | 4 | 376.03 | 8.46  |
| 6 | -10 | 4 | 375.05 | 8.02  |
| 6 | -10 | 4 | 394.34 | 7.62  |
| 6 | -10 | 4 | 357.89 | 7.81  |
| 6 | -10 | 4 | 373.41 | 7.98  |
| 6 | -10 | 4 | 368.26 | 7.92  |
| 6 | -10 | 4 | 407.07 | 8.57  |
| 6 | -10 | 4 | 349.18 | 7.85  |
| 6 | -10 | 4 | 370.22 | 6.99  |

## CIF 31

|   |     |     |        |      |
|---|-----|-----|--------|------|
| 6 | -10 | 4   | 336.57 | 7.81 |
| 6 | -10 | 4   | 396.77 | 7.30 |
| 6 | -10 | 4   | 361.07 | 7.61 |
| 6 | -10 | 5   | 39.58  | 3.02 |
| 6 | -10 | 5   | 44.76  | 2.45 |
| 6 | -10 | 5   | 48.24  | 2.77 |
| 6 | -10 | 5   | 42.93  | 2.64 |
| 6 | -10 | 5   | 36.43  | 2.43 |
| 6 | -10 | 5   | 37.44  | 2.54 |
| 6 | -10 | 5   | 37.52  | 2.04 |
| 6 | -10 | 5   | 51.30  | 2.35 |
| 6 | -10 | 5   | 37.66  | 3.50 |
| 6 | -10 | 5   | 35.98  | 2.36 |
| 6 | -10 | 6   | 260.41 | 5.67 |
| 6 | -10 | 6   | 246.13 | 5.97 |
| 6 | -10 | 6   | 253.60 | 6.23 |
| 6 | -10 | 6   | 248.75 | 6.07 |
| 6 | -10 | 6   | 256.52 | 6.39 |
| 6 | -10 | 6   | 244.54 | 4.69 |
| 6 | -10 | 6   | 255.08 | 7.37 |
| 6 | -10 | 7   | 12.06  | 1.25 |
| 6 | -10 | 7   | 12.50  | 1.41 |
| 6 | -10 | 7   | 12.46  | 1.44 |
| 6 | -10 | 7   | 10.85  | 1.34 |
| 6 | -10 | 7   | 12.02  | 1.47 |
| 6 | -10 | 8   | 147.27 | 3.47 |
| 6 | -10 | 8   | 148.50 | 3.96 |
| 6 | -10 | 8   | 137.42 | 3.88 |
| 6 | -10 | 8   | 143.90 | 4.15 |
| 6 | -10 | 9   | 86.51  | 2.13 |
| 6 | -10 | 9   | 104.62 | 2.85 |
| 6 | -10 | 10  | 285.73 | 4.29 |
| 6 | -9  | -10 | 0.75   | 0.36 |
| 6 | -9  | -10 | 0.78   | 0.39 |
| 6 | -9  | -9  | 247.30 | 3.82 |
| 6 | -9  | -9  | 262.68 | 4.79 |
| 6 | -9  | -8  | 73.38  | 2.20 |
| 6 | -9  | -8  | 83.68  | 3.30 |
| 6 | -9  | -8  | 78.95  | 2.89 |
| 6 | -9  | -8  | 80.69  | 2.81 |
| 6 | -9  | -7  | 199.89 | 4.05 |



## CIF 31

|   |    |    |         |       |
|---|----|----|---------|-------|
| 6 | -9 | -7 | 216.22  | 5.39  |
| 6 | -9 | -7 | 207.59  | 5.19  |
| 6 | -9 | -7 | 206.54  | 5.03  |
| 6 | -9 | -6 | 133.12  | 3.33  |
| 6 | -9 | -6 | 151.69  | 4.86  |
| 6 | -9 | -6 | 141.84  | 4.83  |
| 6 | -9 | -6 | 132.92  | 4.50  |
| 6 | -9 | -6 | 145.57  | 4.57  |
| 6 | -9 | -6 | 143.80  | 4.30  |
| 6 | -9 | -5 | 23.95   | 2.06  |
| 6 | -9 | -5 | 20.61   | 2.01  |
| 6 | -9 | -5 | 24.50   | 2.07  |
| 6 | -9 | -5 | 22.97   | 1.85  |
| 6 | -9 | -5 | 23.93   | 2.01  |
| 6 | -9 | -5 | 24.55   | 1.91  |
| 6 | -9 | -5 | 24.49   | 1.65  |
| 6 | -9 | -4 | 5.91    | 1.07  |
| 6 | -9 | -4 | 5.97    | 1.12  |
| 6 | -9 | -4 | 5.63    | 1.21  |
| 6 | -9 | -4 | 5.55    | 1.31  |
| 6 | -9 | -4 | 4.56    | 1.15  |
| 6 | -9 | -4 | 5.40    | 1.10  |
| 6 | -9 | -4 | 4.40    | 1.15  |
| 6 | -9 | -4 | 6.68    | 1.12  |
| 6 | -9 | -3 | 1.21    | 0.89  |
| 6 | -9 | -3 | 2.39    | 0.94  |
| 6 | -9 | -3 | 0.89    | 0.87  |
| 6 | -9 | -3 | 1.97    | 1.04  |
| 6 | -9 | -3 | 1.80    | 1.01  |
| 6 | -9 | -3 | 0.47    | 0.69  |
| 6 | -9 | -3 | 1.36    | 0.82  |
| 6 | -9 | -3 | 1.21    | 0.93  |
| 6 | -9 | -3 | 1.60    | 0.84  |
| 6 | -9 | -2 | 1171.67 | 15.52 |
| 6 | -9 | -2 | 1126.39 | 15.32 |
| 6 | -9 | -2 | 1144.35 | 15.92 |
| 6 | -9 | -2 | 1101.07 | 16.18 |
| 6 | -9 | -2 | 1119.07 | 15.95 |
| 6 | -9 | -2 | 1090.94 | 15.01 |
| 6 | -9 | -2 | 1142.62 | 14.62 |
| 6 | -9 | -2 | 1159.52 | 15.99 |

## CIF 31

|   |    |    |        |      |
|---|----|----|--------|------|
| 6 | -9 | -1 | 0.72   | 1.19 |
| 6 | -9 | -1 | 0.60   | 2.41 |
| 6 | -9 | -1 | 1.26   | 1.11 |
| 6 | -9 | -1 | 3.72   | 1.28 |
| 6 | -9 | -1 | 0.51   | 0.95 |
| 6 | -9 | -1 | 0.89   | 0.98 |
| 6 | -9 | -1 | 0.26   | 0.93 |
| 6 | -9 | -1 | 0.54   | 0.89 |
| 6 | -9 | -1 | 2.90   | 1.11 |
| 6 | -9 | -1 | 1.92   | 0.76 |
| 6 | -9 | -1 | 1.42   | 1.13 |
| 6 | -9 | -1 | 1.32   | 0.68 |
| 6 | -9 | 0  | 59.96  | 3.02 |
| 6 | -9 | 0  | 62.53  | 3.37 |
| 6 | -9 | 0  | 62.98  | 3.40 |
| 6 | -9 | 0  | 63.33  | 3.33 |
| 6 | -9 | 0  | 62.39  | 3.29 |
| 6 | -9 | 0  | 51.42  | 3.10 |
| 6 | -9 | 0  | 61.58  | 3.38 |
| 6 | -9 | 0  | 55.74  | 3.01 |
| 6 | -9 | 0  | 68.44  | 3.52 |
| 6 | -9 | 0  | 56.62  | 2.85 |
| 6 | -9 | 0  | 62.90  | 3.32 |
| 6 | -9 | 1  | 3.66   | 1.11 |
| 6 | -9 | 1  | 1.93   | 1.75 |
| 6 | -9 | 1  | 2.48   | 1.26 |
| 6 | -9 | 1  | 3.18   | 1.10 |
| 6 | -9 | 1  | 2.41   | 1.41 |
| 6 | -9 | 1  | 5.25   | 1.45 |
| 6 | -9 | 1  | 4.03   | 1.35 |
| 6 | -9 | 1  | 5.71   | 1.43 |
| 6 | -9 | 1  | 4.34   | 1.31 |
| 6 | -9 | 1  | 3.23   | 1.14 |
| 6 | -9 | 1  | 3.15   | 1.00 |
| 6 | -9 | 1  | 1.76   | 1.31 |
| 6 | -9 | 2  | 145.23 | 5.18 |
| 6 | -9 | 2  | 153.42 | 5.23 |
| 6 | -9 | 2  | 142.82 | 4.60 |
| 6 | -9 | 2  | 163.59 | 5.19 |
| 6 | -9 | 2  | 150.62 | 5.09 |
| 6 | -9 | 2  | 152.49 | 5.25 |

## CIF 31

|   |    |   |        |      |
|---|----|---|--------|------|
| 6 | -9 | 2 | 175.77 | 5.72 |
| 6 | -9 | 2 | 137.42 | 4.99 |
| 6 | -9 | 2 | 147.52 | 4.48 |
| 6 | -9 | 2 | 140.93 | 5.24 |
| 6 | -9 | 2 | 164.96 | 4.80 |
| 6 | -9 | 2 | 149.58 | 4.92 |
| 6 | -9 | 3 | 88.01  | 4.07 |
| 6 | -9 | 3 | 83.29  | 3.44 |
| 6 | -9 | 3 | 89.97  | 3.88 |
| 6 | -9 | 3 | 85.48  | 3.88 |
| 6 | -9 | 3 | 81.69  | 3.78 |
| 6 | -9 | 3 | 95.27  | 4.20 |
| 6 | -9 | 3 | 77.71  | 3.15 |
| 6 | -9 | 3 | 84.19  | 4.07 |
| 6 | -9 | 3 | 78.49  | 3.65 |
| 6 | -9 | 4 | 13.08  | 1.90 |
| 6 | -9 | 4 | 11.74  | 1.37 |
| 6 | -9 | 4 | 12.13  | 1.50 |
| 6 | -9 | 4 | 13.22  | 1.36 |
| 6 | -9 | 4 | 12.43  | 1.72 |
| 6 | -9 | 4 | 14.66  | 1.80 |
| 6 | -9 | 4 | 16.21  | 1.99 |
| 6 | -9 | 4 | 13.90  | 1.42 |
| 6 | -9 | 4 | 13.54  | 1.65 |
| 6 | -9 | 5 | 441.82 | 9.41 |
| 6 | -9 | 5 | 467.66 | 8.50 |
| 6 | -9 | 5 | 466.49 | 7.89 |
| 6 | -9 | 5 | 478.80 | 9.22 |
| 6 | -9 | 5 | 431.09 | 8.99 |
| 6 | -9 | 5 | 450.17 | 9.58 |
| 6 | -9 | 5 | 468.75 | 9.75 |
| 6 | -9 | 5 | 469.94 | 7.98 |
| 6 | -9 | 6 | 7.74   | 1.23 |
| 6 | -9 | 6 | 6.19   | 0.97 |
| 6 | -9 | 6 | 6.61   | 1.30 |
| 6 | -9 | 6 | 6.30   | 1.27 |
| 6 | -9 | 6 | 5.80   | 0.88 |
| 6 | -9 | 6 | 7.02   | 1.49 |
| 6 | -9 | 7 | 1.78   | 0.81 |
| 6 | -9 | 7 | 1.57   | 0.90 |
| 6 | -9 | 7 | 1.52   | 0.86 |

## CIF 31

|   |    |     |        |      |
|---|----|-----|--------|------|
| 6 | -9 | 7   | 1.35   | 1.68 |
| 6 | -9 | 8   | 182.98 | 4.22 |
| 6 | -9 | 8   | 183.16 | 4.78 |
| 6 | -9 | 8   | 161.49 | 4.64 |
| 6 | -9 | 8   | 160.76 | 5.34 |
| 6 | -9 | 9   | 139.45 | 3.14 |
| 6 | -9 | 9   | 145.42 | 3.79 |
| 6 | -9 | 9   | 134.50 | 3.72 |
| 6 | -9 | 9   | 137.98 | 4.01 |
| 6 | -9 | 10  | 97.06  | 2.74 |
| 6 | -8 | -11 | 57.08  | 1.55 |
| 6 | -8 | -11 | 59.64  | 1.76 |
| 6 | -8 | -10 | 23.20  | 1.34 |
| 6 | -8 | -10 | 23.14  | 1.32 |
| 6 | -8 | -10 | 24.36  | 1.51 |
| 6 | -8 | -9  | 46.11  | 2.03 |
| 6 | -8 | -9  | 48.22  | 2.50 |
| 6 | -8 | -9  | 46.45  | 2.29 |
| 6 | -8 | -9  | 45.19  | 2.13 |
| 6 | -8 | -8  | 178.60 | 4.27 |
| 6 | -8 | -8  | 159.23 | 5.04 |
| 6 | -8 | -7  | 17.44  | 1.70 |
| 6 | -8 | -7  | 17.67  | 1.80 |
| 6 | -8 | -7  | 16.54  | 1.83 |
| 6 | -8 | -7  | 13.07  | 1.74 |
| 6 | -8 | -7  | 16.41  | 1.80 |
| 6 | -8 | -7  | 18.00  | 1.65 |
| 6 | -8 | -7  | 17.24  | 1.81 |
| 6 | -8 | -7  | 18.43  | 1.77 |
| 6 | -8 | -6  | 52.20  | 2.91 |
| 6 | -8 | -6  | 57.16  | 3.12 |
| 6 | -8 | -6  | 50.57  | 3.13 |
| 6 | -8 | -6  | 59.51  | 3.24 |
| 6 | -8 | -6  | 48.54  | 3.17 |
| 6 | -8 | -6  | 54.60  | 3.13 |
| 6 | -8 | -6  | 59.66  | 3.17 |
| 6 | -8 | -6  | 52.69  | 2.80 |
| 6 | -8 | -5  | 44.14  | 2.62 |
| 6 | -8 | -5  | 45.28  | 2.78 |
| 6 | -8 | -5  | 43.81  | 2.99 |
| 6 | -8 | -5  | 46.29  | 2.85 |

## CIF 31

|   |    |    |        |      |
|---|----|----|--------|------|
| 6 | -8 | -5 | 48.01  | 3.04 |
| 6 | -8 | -5 | 41.67  | 2.76 |
| 6 | -8 | -5 | 38.10  | 2.38 |
| 6 | -8 | -5 | 44.50  | 2.57 |
| 6 | -8 | -5 | 45.07  | 2.84 |
| 6 | -8 | -5 | 43.30  | 2.47 |
| 6 | -8 | -4 | 22.23  | 1.97 |
| 6 | -8 | -4 | 18.81  | 1.83 |
| 6 | -8 | -4 | 17.44  | 1.77 |
| 6 | -8 | -4 | 21.59  | 2.01 |
| 6 | -8 | -4 | 16.01  | 1.91 |
| 6 | -8 | -4 | 19.03  | 1.99 |
| 6 | -8 | -4 | 16.74  | 1.70 |
| 6 | -8 | -4 | 16.59  | 1.63 |
| 6 | -8 | -4 | 18.76  | 1.94 |
| 6 | -8 | -4 | 20.73  | 1.78 |
| 6 | -8 | -3 | 4.49   | 1.38 |
| 6 | -8 | -3 | 3.01   | 1.23 |
| 6 | -8 | -3 | 5.19   | 1.74 |
| 6 | -8 | -3 | 5.51   | 1.32 |
| 6 | -8 | -3 | 5.03   | 1.35 |
| 6 | -8 | -3 | 5.13   | 1.30 |
| 6 | -8 | -3 | 5.77   | 1.23 |
| 6 | -8 | -3 | 5.95   | 1.11 |
| 6 | -8 | -3 | 5.59   | 1.27 |
| 6 | -8 | -3 | 4.76   | 1.05 |
| 6 | -8 | -2 | 7.70   | 1.63 |
| 6 | -8 | -2 | 8.41   | 1.58 |
| 6 | -8 | -2 | 8.13   | 2.40 |
| 6 | -8 | -2 | 8.37   | 1.46 |
| 6 | -8 | -2 | 9.51   | 1.56 |
| 6 | -8 | -2 | 7.52   | 1.40 |
| 6 | -8 | -2 | 10.48  | 1.50 |
| 6 | -8 | -2 | 14.31  | 1.57 |
| 6 | -8 | -2 | 7.57   | 1.47 |
| 6 | -8 | -2 | 10.08  | 1.28 |
| 6 | -8 | -2 | 10.24  | 1.62 |
| 6 | -8 | -2 | 9.49   | 1.16 |
| 6 | -8 | -1 | 237.06 | 6.08 |
| 6 | -8 | -1 | 238.59 | 5.73 |
| 6 | -8 | -1 | 231.08 | 6.25 |

## CIF 31

|   |    |    |         |       |
|---|----|----|---------|-------|
| 6 | -8 | -1 | 214.79  | 6.13  |
| 6 | -8 | -1 | 231.20  | 6.33  |
| 6 | -8 | -1 | 231.79  | 5.81  |
| 6 | -8 | -1 | 251.58  | 6.71  |
| 6 | -8 | -1 | 237.56  | 6.30  |
| 6 | -8 | -1 | 247.86  | 6.48  |
| 6 | -8 | -1 | 251.77  | 5.84  |
| 6 | -8 | -1 | 226.12  | 5.23  |
| 6 | -8 | -1 | 239.94  | 6.40  |
| 6 | -8 | 0  | 5283.09 | 50.31 |
| 6 | -8 | 0  | 5645.85 | 50.01 |
| 6 | -8 | 0  | 5197.60 | 50.61 |
| 6 | -8 | 0  | 5099.72 | 48.47 |
| 6 | -8 | 0  | 5177.32 | 48.99 |
| 6 | -8 | 0  | 5136.38 | 49.99 |
| 6 | -8 | 0  | 5068.84 | 50.48 |
| 6 | -8 | 0  | 5376.50 | 51.38 |
| 6 | -8 | 0  | 5329.33 | 50.87 |
| 6 | -8 | 0  | 4936.77 | 48.36 |
| 6 | -8 | 0  | 5526.34 | 51.28 |
| 6 | -8 | 0  | 5290.07 | 47.58 |
| 6 | -8 | 1  | 123.73  | 4.30  |
| 6 | -8 | 1  | 121.04  | 4.48  |
| 6 | -8 | 1  | 123.57  | 4.10  |
| 6 | -8 | 1  | 122.50  | 4.42  |
| 6 | -8 | 1  | 109.74  | 4.34  |
| 6 | -8 | 1  | 123.25  | 4.73  |
| 6 | -8 | 1  | 117.78  | 4.54  |
| 6 | -8 | 1  | 118.66  | 3.85  |
| 6 | -8 | 1  | 134.70  | 4.79  |
| 6 | -8 | 1  | 119.23  | 4.45  |
| 6 | -8 | 2  | 1015.83 | 14.40 |
| 6 | -8 | 2  | 961.79  | 13.34 |
| 6 | -8 | 2  | 969.63  | 14.18 |
| 6 | -8 | 2  | 1017.67 | 14.61 |
| 6 | -8 | 2  | 998.18  | 15.13 |
| 6 | -8 | 2  | 940.70  | 12.75 |
| 6 | -8 | 2  | 976.09  | 14.86 |
| 6 | -8 | 2  | 897.29  | 14.40 |
| 6 | -8 | 3  | 127.38  | 4.57  |
| 6 | -8 | 3  | 111.71  | 3.92  |

## CIF 31

|   |    |     |        |      |
|---|----|-----|--------|------|
| 6 | -8 | 3   | 114.08 | 3.62 |
| 6 | -8 | 3   | 122.05 | 4.48 |
| 6 | -8 | 3   | 121.13 | 4.72 |
| 6 | -8 | 4   | 311.51 | 7.39 |
| 6 | -8 | 4   | 288.33 | 6.46 |
| 6 | -8 | 4   | 275.53 | 6.79 |
| 6 | -8 | 4   | 301.11 | 7.28 |
| 6 | -8 | 4   | 285.22 | 7.42 |
| 6 | -8 | 5   | 90.55  | 3.48 |
| 6 | -8 | 5   | 95.79  | 3.93 |
| 6 | -8 | 5   | 87.67  | 3.83 |
| 6 | -8 | 5   | 97.08  | 4.21 |
| 6 | -8 | 6   | 6.53   | 1.32 |
| 6 | -8 | 6   | 7.51   | 1.20 |
| 6 | -8 | 6   | 7.58   | 1.38 |
| 6 | -8 | 6   | 7.48   | 1.34 |
| 6 | -8 | 7   | 94.65  | 3.98 |
| 6 | -8 | 7   | 84.82  | 3.17 |
| 6 | -8 | 7   | 73.68  | 3.37 |
| 6 | -8 | 7   | 107.31 | 4.26 |
| 6 | -8 | 8   | 121.99 | 3.52 |
| 6 | -8 | 8   | 117.27 | 4.01 |
| 6 | -8 | 9   | 323.22 | 5.39 |
| 6 | -8 | 9   | 316.49 | 6.26 |
| 6 | -8 | 10  | 61.30  | 2.16 |
| 6 | -7 | -12 | 295.47 | 4.30 |
| 6 | -7 | -12 | 294.70 | 4.28 |
| 6 | -7 | -11 | 71.43  | 2.05 |
| 6 | -7 | -11 | 70.14  | 2.37 |
| 6 | -7 | -11 | 72.78  | 2.48 |
| 6 | -7 | -10 | 31.46  | 1.88 |
| 6 | -7 | -10 | 22.55  | 1.69 |
| 6 | -7 | -10 | 21.53  | 1.84 |
| 6 | -7 | -10 | 31.34  | 1.90 |
| 6 | -7 | -10 | 26.68  | 1.65 |
| 6 | -7 | -9  | 44.57  | 2.61 |
| 6 | -7 | -9  | 42.79  | 2.77 |
| 6 | -7 | -9  | 41.09  | 2.65 |
| 6 | -7 | -9  | 37.58  | 2.32 |
| 6 | -7 | -9  | 41.14  | 2.40 |
| 6 | -7 | -8  | 63.91  | 3.29 |

## CIF 31

|   |    |    |        |      |
|---|----|----|--------|------|
| 6 | -7 | -8 | 61.12  | 3.45 |
| 6 | -7 | -8 | 54.81  | 3.21 |
| 6 | -7 | -8 | 57.04  | 3.24 |
| 6 | -7 | -8 | 54.70  | 2.83 |
| 6 | -7 | -8 | 64.06  | 2.88 |
| 6 | -7 | -8 | 60.06  | 2.84 |
| 6 | -7 | -8 | 56.42  | 3.25 |
| 6 | -7 | -7 | 136.99 | 4.90 |
| 6 | -7 | -7 | 134.21 | 4.79 |
| 6 | -7 | -7 | 143.30 | 5.34 |
| 6 | -7 | -7 | 124.91 | 4.62 |
| 6 | -7 | -7 | 129.14 | 4.99 |
| 6 | -7 | -7 | 140.67 | 5.13 |
| 6 | -7 | -7 | 126.95 | 4.50 |
| 6 | -7 | -7 | 130.30 | 4.32 |
| 6 | -7 | -7 | 135.17 | 4.96 |
| 6 | -7 | -6 | 338.52 | 7.69 |
| 6 | -7 | -6 | 342.94 | 7.72 |
| 6 | -7 | -6 | 365.35 | 8.44 |
| 6 | -7 | -6 | 340.41 | 7.78 |
| 6 | -7 | -6 | 324.91 | 8.02 |
| 6 | -7 | -6 | 347.71 | 8.27 |
| 6 | -7 | -6 | 322.86 | 7.45 |
| 6 | -7 | -6 | 334.56 | 7.14 |
| 6 | -7 | -6 | 339.03 | 8.02 |
| 6 | -7 | -5 | 74.48  | 3.20 |
| 6 | -7 | -5 | 69.61  | 3.48 |
| 6 | -7 | -5 | 74.32  | 3.44 |
| 6 | -7 | -5 | 78.86  | 3.47 |
| 6 | -7 | -5 | 80.43  | 3.80 |
| 6 | -7 | -5 | 83.96  | 3.67 |
| 6 | -7 | -5 | 76.45  | 3.75 |
| 6 | -7 | -5 | 74.48  | 3.67 |
| 6 | -7 | -5 | 75.31  | 3.70 |
| 6 | -7 | -5 | 75.75  | 3.47 |
| 6 | -7 | -5 | 78.90  | 3.66 |
| 6 | -7 | -4 | 193.93 | 5.28 |
| 6 | -7 | -4 | 214.60 | 6.04 |
| 6 | -7 | -4 | 189.11 | 5.71 |
| 6 | -7 | -4 | 201.73 | 5.63 |
| 6 | -7 | -4 | 162.99 | 5.18 |



## CIF 31

|   |    |    |         |       |
|---|----|----|---------|-------|
| 6 | -7 | -4 | 202.27  | 5.46  |
| 6 | -7 | -4 | 188.70  | 5.48  |
| 6 | -7 | -4 | 191.83  | 5.13  |
| 6 | -7 | -4 | 201.42  | 5.81  |
| 6 | -7 | -4 | 192.30  | 5.80  |
| 6 | -7 | -4 | 200.02  | 5.65  |
| 6 | -7 | -4 | 218.05  | 5.37  |
| 6 | -7 | -4 | 204.23  | 5.86  |
| 6 | -7 | -3 | 53.62   | 3.02  |
| 6 | -7 | -3 | 47.84   | 2.87  |
| 6 | -7 | -3 | 54.52   | 2.99  |
| 6 | -7 | -3 | 47.99   | 3.36  |
| 6 | -7 | -3 | 54.97   | 2.97  |
| 6 | -7 | -3 | 55.07   | 3.00  |
| 6 | -7 | -3 | 56.54   | 3.03  |
| 6 | -7 | -3 | 51.66   | 3.01  |
| 6 | -7 | -3 | 61.19   | 3.13  |
| 6 | -7 | -3 | 59.30   | 2.88  |
| 6 | -7 | -3 | 61.07   | 3.14  |
| 6 | -7 | -3 | 58.35   | 2.72  |
| 6 | -7 | -2 | 1004.35 | 14.32 |
| 6 | -7 | -2 | 1041.80 | 13.00 |
| 6 | -7 | -2 | 1001.92 | 14.33 |
| 6 | -7 | -2 | 1023.58 | 14.53 |
| 6 | -7 | -2 | 982.86  | 14.28 |
| 6 | -7 | -2 | 859.43  | 13.70 |
| 6 | -7 | -2 | 1173.87 | 15.56 |
| 6 | -7 | -2 | 1095.30 | 14.99 |
| 6 | -7 | -2 | 999.40  | 13.30 |
| 6 | -7 | -2 | 1050.31 | 14.18 |
| 6 | -7 | -2 | 1117.05 | 15.05 |
| 6 | -7 | -2 | 1075.20 | 12.86 |
| 6 | -7 | -1 | 22.02   | 1.95  |
| 6 | -7 | -1 | 24.05   | 1.73  |
| 6 | -7 | -1 | 21.41   | 1.93  |
| 6 | -7 | -1 | 22.44   | 1.98  |
| 6 | -7 | -1 | 22.39   | 1.88  |
| 6 | -7 | -1 | 20.24   | 1.82  |
| 6 | -7 | -1 | 16.36   | 1.84  |
| 6 | -7 | -1 | 21.64   | 1.98  |
| 6 | -7 | -1 | 22.08   | 1.63  |

## CIF 31

|   |    |    |        |      |
|---|----|----|--------|------|
| 6 | -7 | -1 | 24.02  | 2.00 |
| 6 | -7 | -1 | 22.27  | 1.60 |
| 6 | -7 | 0  | 204.53 | 5.19 |
| 6 | -7 | 0  | 200.52 | 5.45 |
| 6 | -7 | 0  | 195.85 | 4.97 |
| 6 | -7 | 0  | 188.49 | 4.76 |
| 6 | -7 | 0  | 200.03 | 5.35 |
| 6 | -7 | 0  | 179.36 | 5.30 |
| 6 | -7 | 0  | 208.29 | 5.49 |
| 6 | -7 | 0  | 202.85 | 5.75 |
| 6 | -7 | 0  | 209.02 | 5.60 |
| 6 | -7 | 0  | 213.61 | 4.57 |
| 6 | -7 | 0  | 191.59 | 5.60 |
| 6 | -7 | 1  | 243.23 | 5.88 |
| 6 | -7 | 1  | 218.51 | 4.96 |
| 6 | -7 | 1  | 219.17 | 5.15 |
| 6 | -7 | 1  | 231.82 | 5.73 |
| 6 | -7 | 1  | 227.96 | 5.94 |
| 6 | -7 | 1  | 217.10 | 5.70 |
| 6 | -7 | 1  | 224.96 | 6.05 |
| 6 | -7 | 1  | 217.48 | 4.39 |
| 6 | -7 | 1  | 200.51 | 5.88 |
| 6 | -7 | 2  | 286.11 | 6.71 |
| 6 | -7 | 2  | 285.72 | 6.00 |
| 6 | -7 | 2  | 291.72 | 6.61 |
| 6 | -7 | 2  | 288.25 | 7.04 |
| 6 | -7 | 3  | 532.57 | 9.78 |
| 6 | -7 | 3  | 512.28 | 8.54 |
| 6 | -7 | 3  | 500.91 | 9.24 |
| 6 | -7 | 3  | 506.56 | 9.39 |
| 6 | -7 | 3  | 533.06 | 9.08 |
| 6 | -7 | 4  | 6.25   | 1.29 |
| 6 | -7 | 4  | 5.96   | 1.09 |
| 6 | -7 | 4  | 4.20   | 0.94 |
| 6 | -7 | 4  | 3.97   | 1.14 |
| 6 | -7 | 5  | 287.03 | 7.11 |
| 6 | -7 | 5  | 303.27 | 7.08 |
| 6 | -7 | 5  | 303.86 | 7.43 |
| 6 | -7 | 6  | 5.02   | 1.19 |
| 6 | -7 | 6  | 3.65   | 1.06 |
| 6 | -7 | 6  | 4.30   | 1.14 |

## CIF 31

|   |    |     |        |       |
|---|----|-----|--------|-------|
| 6 | -7 | 7   | 327.72 | 7.39  |
| 6 | -7 | 7   | 353.65 | 7.79  |
| 6 | -7 | 8   | 22.35  | 1.88  |
| 6 | -7 | 8   | 22.70  | 1.87  |
| 6 | -7 | 8   | 26.69  | 2.21  |
| 6 | -7 | 9   | 76.10  | 2.93  |
| 6 | -7 | 9   | 84.15  | 3.57  |
| 6 | -7 | 10  | 72.12  | 2.37  |
| 6 | -6 | -13 | 431.59 | 5.19  |
| 6 | -6 | -13 | 355.42 | 4.56  |
| 6 | -6 | -12 | 105.29 | 2.87  |
| 6 | -6 | -11 | 898.87 | 10.53 |
| 6 | -6 | -11 | 861.64 | 12.65 |
| 6 | -6 | -11 | 872.48 | 11.43 |
| 6 | -6 | -11 | 915.73 | 11.78 |
| 6 | -6 | -10 | 739.85 | 12.15 |
| 6 | -6 | -10 | 729.73 | 12.44 |
| 6 | -6 | -10 | 729.53 | 11.31 |
| 6 | -6 | -9  | 75.48  | 3.77  |
| 6 | -6 | -9  | 70.30  | 3.66  |
| 6 | -6 | -9  | 78.04  | 3.94  |
| 6 | -6 | -9  | 71.16  | 3.43  |
| 6 | -6 | -9  | 74.49  | 3.11  |
| 6 | -6 | -9  | 78.93  | 3.25  |
| 6 | -6 | -9  | 74.82  | 3.47  |
| 6 | -6 | -8  | 80.13  | 3.95  |
| 6 | -6 | -8  | 81.16  | 3.89  |
| 6 | -6 | -8  | 64.91  | 3.55  |
| 6 | -6 | -8  | 71.02  | 3.74  |
| 6 | -6 | -8  | 78.42  | 3.66  |
| 6 | -6 | -8  | 76.41  | 3.26  |
| 6 | -6 | -8  | 74.03  | 3.20  |
| 6 | -6 | -8  | 78.84  | 3.81  |
| 6 | -6 | -7  | 329.47 | 7.33  |
| 6 | -6 | -7  | 350.69 | 8.24  |
| 6 | -6 | -7  | 353.49 | 8.31  |
| 6 | -6 | -7  | 325.75 | 7.62  |
| 6 | -6 | -7  | 340.83 | 8.23  |
| 6 | -6 | -7  | 329.67 | 8.13  |
| 6 | -6 | -7  | 312.74 | 7.50  |
| 6 | -6 | -7  | 374.07 | 7.18  |

## CIF 31

|   |    |    |        |      |
|---|----|----|--------|------|
| 6 | -6 | -7 | 344.13 | 7.22 |
| 6 | -6 | -7 | 348.57 | 8.07 |
| 6 | -6 | -6 | 1.61   | 0.86 |
| 6 | -6 | -6 | 1.97   | 0.90 |
| 6 | -6 | -6 | 0.79   | 1.03 |
| 6 | -6 | -6 | 1.86   | 0.97 |
| 6 | -6 | -6 | 1.65   | 0.81 |
| 6 | -6 | -6 | 1.23   | 0.93 |
| 6 | -6 | -6 | 1.50   | 0.87 |
| 6 | -6 | -6 | 1.14   | 0.74 |
| 6 | -6 | -6 | 1.60   | 1.01 |
| 6 | -6 | -6 | 2.75   | 1.20 |
| 6 | -6 | -6 | 2.64   | 0.96 |
| 6 | -6 | -6 | 2.30   | 1.09 |
| 6 | -6 | -6 | 1.98   | 0.82 |
| 6 | -6 | -5 | 37.75  | 2.47 |
| 6 | -6 | -5 | 44.89  | 2.86 |
| 6 | -6 | -5 | 33.42  | 2.51 |
| 6 | -6 | -5 | 37.73  | 2.61 |
| 6 | -6 | -5 | 38.84  | 2.56 |
| 6 | -6 | -5 | 40.23  | 2.33 |
| 6 | -6 | -5 | 40.05  | 2.64 |
| 6 | -6 | -5 | 41.01  | 2.46 |
| 6 | -6 | -5 | 37.67  | 2.37 |
| 6 | -6 | -5 | 42.95  | 2.65 |
| 6 | -6 | -5 | 39.72  | 2.65 |
| 6 | -6 | -5 | 43.70  | 2.67 |
| 6 | -6 | -5 | 41.41  | 2.16 |
| 6 | -6 | -5 | 44.18  | 2.72 |
| 6 | -6 | -4 | 226.87 | 5.87 |
| 6 | -6 | -4 | 287.05 | 6.41 |
| 6 | -6 | -4 | 245.47 | 6.37 |
| 6 | -6 | -4 | 237.66 | 6.34 |
| 6 | -6 | -4 | 248.11 | 6.20 |
| 6 | -6 | -4 | 234.44 | 5.94 |
| 6 | -6 | -4 | 271.07 | 6.07 |
| 6 | -6 | -4 | 225.26 | 5.82 |
| 6 | -6 | -4 | 246.73 | 6.07 |
| 6 | -6 | -4 | 215.69 | 5.94 |
| 6 | -6 | -4 | 247.92 | 6.27 |
| 6 | -6 | -4 | 225.77 | 5.71 |

## CIF 31

|   |    |    |         |       |
|---|----|----|---------|-------|
| 6 | -6 | -4 | 245.35  | 6.18  |
| 6 | -6 | -3 | 10.92   | 1.61  |
| 6 | -6 | -3 | 9.14    | 1.31  |
| 6 | -6 | -3 | 11.02   | 1.41  |
| 6 | -6 | -3 | 10.08   | 1.37  |
| 6 | -6 | -3 | 13.03   | 1.60  |
| 6 | -6 | -3 | 10.77   | 1.42  |
| 6 | -6 | -3 | 11.47   | 1.49  |
| 6 | -6 | -3 | 9.85    | 1.18  |
| 6 | -6 | -2 | 3279.65 | 33.70 |
| 6 | -6 | -2 | 3457.23 | 31.71 |
| 6 | -6 | -2 | 3318.69 | 33.06 |
| 6 | -6 | -2 | 3386.40 | 33.51 |
| 6 | -6 | -2 | 3137.28 | 32.68 |
| 6 | -6 | -2 | 3265.62 | 33.12 |
| 6 | -6 | -2 | 3090.29 | 32.53 |
| 6 | -6 | -2 | 3236.07 | 33.72 |
| 6 | -6 | -2 | 3307.36 | 32.69 |
| 6 | -6 | -1 | 357.49  | 7.64  |
| 6 | -6 | -1 | 407.16  | 7.03  |
| 6 | -6 | -1 | 349.57  | 6.99  |
| 6 | -6 | -1 | 372.83  | 7.19  |
| 6 | -6 | -1 | 340.33  | 7.03  |
| 6 | -6 | -1 | 366.15  | 7.03  |
| 6 | -6 | -1 | 364.48  | 7.29  |
| 6 | -6 | -1 | 378.83  | 7.17  |
| 6 | -6 | -1 | 344.79  | 7.35  |
| 6 | -6 | -1 | 366.41  | 7.65  |
| 6 | -6 | -1 | 378.74  | 7.29  |
| 6 | -6 | 0  | 1.12    | 0.80  |
| 6 | -6 | 0  | 1.60    | 0.81  |
| 6 | -6 | 0  | 1.38    | 0.81  |
| 6 | -6 | 0  | 2.74    | 0.86  |
| 6 | -6 | 0  | 3.55    | 1.05  |
| 6 | -6 | 0  | 0.80    | 0.81  |
| 6 | -6 | 1  | 167.69  | 4.29  |
| 6 | -6 | 1  | 165.51  | 4.58  |
| 6 | -6 | 1  | 156.67  | 4.51  |
| 6 | -6 | 1  | 173.20  | 4.93  |
| 6 | -6 | 2  | 442.98  | 7.99  |
| 6 | -6 | 2  | 462.41  | 8.21  |

## CIF 31

|   |    |     |        |       |
|---|----|-----|--------|-------|
| 6 | -6 | 2   | 457.79 | 8.57  |
| 6 | -6 | 3   | 503.51 | 9.12  |
| 6 | -6 | 3   | 478.93 | 8.70  |
| 6 | -6 | 4   | 0.68   | 0.81  |
| 6 | -6 | 4   | 1.98   | 0.92  |
| 6 | -6 | 5   | 135.21 | 4.64  |
| 6 | -6 | 5   | 119.10 | 4.21  |
| 6 | -6 | 5   | 130.14 | 4.51  |
| 6 | -6 | 5   | 126.08 | 4.55  |
| 6 | -6 | 6   | 1.77   | 0.92  |
| 6 | -6 | 6   | 1.06   | 0.85  |
| 6 | -6 | 6   | 1.27   | 0.90  |
| 6 | -6 | 7   | 901.95 | 13.25 |
| 6 | -6 | 7   | 899.95 | 13.48 |
| 6 | -6 | 8   | 10.78  | 1.37  |
| 6 | -6 | 8   | 9.34   | 1.29  |
| 6 | -6 | 9   | 224.75 | 5.13  |
| 6 | -6 | 9   | 260.92 | 6.12  |
| 6 | -5 | -13 | 718.51 | 8.44  |
| 6 | -5 | -13 | 695.65 | 8.47  |
| 6 | -5 | -12 | 137.21 | 3.70  |
| 6 | -5 | -12 | 116.14 | 4.09  |
| 6 | -5 | -12 | 120.03 | 3.39  |
| 6 | -5 | -12 | 134.55 | 3.62  |
| 6 | -5 | -11 | 652.42 | 11.61 |
| 6 | -5 | -11 | 658.00 | 9.85  |
| 6 | -5 | -11 | 664.44 | 10.00 |
| 6 | -5 | -10 | 160.77 | 5.60  |
| 6 | -5 | -10 | 145.27 | 5.35  |
| 6 | -5 | -10 | 138.13 | 4.99  |
| 6 | -5 | -10 | 131.03 | 4.01  |
| 6 | -5 | -10 | 152.29 | 4.50  |
| 6 | -5 | -10 | 145.91 | 4.74  |
| 6 | -5 | -9  | 162.16 | 5.20  |
| 6 | -5 | -9  | 175.40 | 5.31  |
| 6 | -5 | -9  | 176.30 | 5.94  |
| 6 | -5 | -9  | 163.09 | 5.51  |
| 6 | -5 | -9  | 172.22 | 5.83  |
| 6 | -5 | -9  | 171.07 | 5.60  |
| 6 | -5 | -9  | 167.37 | 4.78  |
| 6 | -5 | -9  | 185.79 | 4.99  |

## CIF 31

|   |    |    |        |      |
|---|----|----|--------|------|
| 6 | -5 | -9 | 160.87 | 5.58 |
| 6 | -5 | -9 | 172.80 | 5.55 |
| 6 | -5 | -8 | 399.16 | 8.51 |
| 6 | -5 | -8 | 446.82 | 9.73 |
| 6 | -5 | -8 | 420.99 | 9.09 |
| 6 | -5 | -8 | 459.95 | 9.68 |
| 6 | -5 | -8 | 479.52 | 9.56 |
| 6 | -5 | -8 | 420.06 | 9.41 |
| 6 | -5 | -8 | 428.27 | 9.24 |
| 6 | -5 | -8 | 450.68 | 8.96 |
| 6 | -5 | -8 | 465.64 | 8.26 |
| 6 | -5 | -8 | 384.86 | 8.91 |
| 6 | -5 | -7 | 12.34  | 1.53 |
| 6 | -5 | -7 | 19.75  | 2.00 |
| 6 | -5 | -7 | 14.88  | 1.73 |
| 6 | -5 | -7 | 13.79  | 1.68 |
| 6 | -5 | -7 | 14.27  | 1.69 |
| 6 | -5 | -7 | 13.10  | 1.81 |
| 6 | -5 | -7 | 15.21  | 1.70 |
| 6 | -5 | -7 | 10.99  | 1.56 |
| 6 | -5 | -7 | 13.36  | 1.36 |
| 6 | -5 | -6 | 112.26 | 4.15 |
| 6 | -5 | -6 | 112.97 | 4.37 |
| 6 | -5 | -6 | 113.65 | 3.94 |
| 6 | -5 | -6 | 121.94 | 4.41 |
| 6 | -5 | -6 | 109.85 | 4.27 |
| 6 | -5 | -6 | 109.73 | 4.20 |
| 6 | -5 | -6 | 129.06 | 4.41 |
| 6 | -5 | -6 | 108.42 | 3.83 |
| 6 | -5 | -6 | 106.25 | 4.06 |
| 6 | -5 | -6 | 115.08 | 4.04 |
| 6 | -5 | -6 | 130.16 | 4.62 |
| 6 | -5 | -6 | 110.53 | 3.82 |
| 6 | -5 | -6 | 106.05 | 3.42 |
| 6 | -5 | -5 | 177.43 | 5.14 |
| 6 | -5 | -5 | 188.49 | 5.67 |
| 6 | -5 | -5 | 179.89 | 5.38 |
| 6 | -5 | -5 | 190.42 | 5.38 |
| 6 | -5 | -5 | 177.53 | 4.75 |
| 6 | -5 | -5 | 189.87 | 5.29 |
| 6 | -5 | -5 | 192.09 | 5.24 |

## CIF 31

|   |    |    |        |      |
|---|----|----|--------|------|
| 6 | -5 | -5 | 191.12 | 5.43 |
| 6 | -5 | -5 | 178.30 | 5.12 |
| 6 | -5 | -4 | 421.63 | 8.22 |
| 6 | -5 | -4 | 405.25 | 8.09 |
| 6 | -5 | -4 | 415.67 | 8.31 |
| 6 | -5 | -4 | 430.28 | 8.24 |
| 6 | -5 | -4 | 408.79 | 7.57 |
| 6 | -5 | -4 | 421.37 | 7.28 |
| 6 | -5 | -4 | 416.96 | 7.95 |
| 6 | -5 | -4 | 458.10 | 7.95 |
| 6 | -5 | -4 | 377.44 | 7.74 |
| 6 | -5 | -4 | 431.33 | 8.34 |
| 6 | -5 | -4 | 382.36 | 7.75 |
| 6 | -5 | -4 | 408.09 | 6.76 |
| 6 | -5 | -4 | 414.44 | 7.98 |
| 6 | -5 | -3 | 98.51  | 3.73 |
| 6 | -5 | -3 | 97.42  | 3.29 |
| 6 | -5 | -3 | 98.72  | 3.67 |
| 6 | -5 | -3 | 90.71  | 3.27 |
| 6 | -5 | -3 | 103.00 | 3.45 |
| 6 | -5 | -3 | 103.01 | 3.66 |
| 6 | -5 | -3 | 95.47  | 3.67 |
| 6 | -5 | -3 | 102.18 | 3.21 |
| 6 | -5 | -3 | 97.12  | 3.53 |
| 6 | -5 | -2 | 184.39 | 5.08 |
| 6 | -5 | -2 | 190.60 | 4.61 |
| 6 | -5 | -2 | 193.44 | 5.04 |
| 6 | -5 | -2 | 174.51 | 4.55 |
| 6 | -5 | -2 | 189.89 | 4.76 |
| 6 | -5 | -2 | 206.79 | 4.78 |
| 6 | -5 | -2 | 222.74 | 5.36 |
| 6 | -5 | -2 | 196.32 | 5.28 |
| 6 | -5 | -2 | 184.75 | 4.63 |
| 6 | -5 | -1 | 209.10 | 5.50 |
| 6 | -5 | -1 | 224.82 | 4.93 |
| 6 | -5 | -1 | 234.33 | 5.36 |
| 6 | -5 | -1 | 219.42 | 4.87 |
| 6 | -5 | -1 | 216.68 | 5.06 |
| 6 | -5 | -1 | 178.72 | 4.47 |
| 6 | -5 | -1 | 217.80 | 5.41 |
| 6 | -5 | -1 | 194.50 | 5.25 |



## CIF 31

|   |    |     |         |       |
|---|----|-----|---------|-------|
| 6 | -5 | -1  | 234.73  | 5.20  |
| 6 | -5 | 0   | 0.64    | 0.83  |
| 6 | -5 | 0   | 0.44    | 0.71  |
| 6 | -5 | 0   | 0.46    | 0.66  |
| 6 | -5 | 0   | 0.97    | 0.68  |
| 6 | -5 | 0   | 0.37    | 0.58  |
| 6 | -5 | 0   | 0.15    | 0.79  |
| 6 | -5 | 0   | 0.47    | 0.78  |
| 6 | -5 | 1   | 1078.47 | 13.19 |
| 6 | -5 | 1   | 1027.88 | 12.93 |
| 6 | -5 | 1   | 1012.57 | 12.88 |
| 6 | -5 | 1   | 986.01  | 13.85 |
| 6 | -5 | 1   | 1107.31 | 14.07 |
| 6 | -5 | 2   | 239.77  | 5.29  |
| 6 | -5 | 2   | 228.18  | 5.21  |
| 6 | -5 | 3   | 7.40    | 1.11  |
| 6 | -5 | 3   | 8.12    | 1.29  |
| 6 | -5 | 4   | 7.71    | 1.17  |
| 6 | -5 | 4   | 4.39    | 1.10  |
| 6 | -5 | 5   | 48.21   | 2.74  |
| 6 | -5 | 6   | 335.67  | 7.39  |
| 6 | -5 | 6   | 318.53  | 7.28  |
| 6 | -5 | 7   | 1252.28 | 16.38 |
| 6 | -5 | 7   | 1176.77 | 15.88 |
| 6 | -5 | 8   | 311.74  | 6.71  |
| 6 | -5 | 9   | 130.62  | 4.15  |
| 6 | -4 | -14 | 40.11   | 1.89  |
| 6 | -4 | -14 | 41.77   | 1.33  |
| 6 | -4 | -13 | 268.56  | 6.36  |
| 6 | -4 | -13 | 252.57  | 4.85  |
| 6 | -4 | -12 | 393.35  | 8.89  |
| 6 | -4 | -12 | 413.48  | 7.15  |
| 6 | -4 | -11 | 75.38   | 3.49  |
| 6 | -4 | -11 | 73.59   | 3.86  |
| 6 | -4 | -11 | 65.57   | 3.59  |
| 6 | -4 | -11 | 72.34   | 3.66  |
| 6 | -4 | -11 | 66.15   | 3.00  |
| 6 | -4 | -11 | 71.02   | 3.20  |
| 6 | -4 | -10 | 9.53    | 1.47  |
| 6 | -4 | -10 | 12.68   | 1.68  |
| 6 | -4 | -10 | 10.85   | 1.84  |

## CIF 31

|   |    |     |        |      |
|---|----|-----|--------|------|
| 6 | -4 | -10 | 7.50   | 1.59 |
| 6 | -4 | -10 | 9.27   | 1.60 |
| 6 | -4 | -10 | 9.03   | 1.19 |
| 6 | -4 | -10 | 9.39   | 1.32 |
| 6 | -4 | -10 | 11.13  | 1.57 |
| 6 | -4 | -9  | 80.95  | 3.79 |
| 6 | -4 | -9  | 88.86  | 4.08 |
| 6 | -4 | -9  | 78.81  | 3.35 |
| 6 | -4 | -9  | 81.27  | 4.16 |
| 6 | -4 | -9  | 75.39  | 3.67 |
| 6 | -4 | -9  | 76.76  | 3.67 |
| 6 | -4 | -9  | 78.28  | 3.95 |
| 6 | -4 | -9  | 77.63  | 3.24 |
| 6 | -4 | -9  | 87.71  | 3.95 |
| 6 | -4 | -8  | 380.84 | 8.39 |
| 6 | -4 | -8  | 435.48 | 8.98 |
| 6 | -4 | -8  | 383.75 | 8.35 |
| 6 | -4 | -8  | 379.11 | 7.77 |
| 6 | -4 | -8  | 410.83 | 9.21 |
| 6 | -4 | -8  | 363.83 | 8.08 |
| 6 | -4 | -8  | 318.33 | 7.68 |
| 6 | -4 | -8  | 362.44 | 8.49 |
| 6 | -4 | -8  | 356.87 | 7.46 |
| 6 | -4 | -8  | 366.70 | 8.28 |
| 6 | -4 | -8  | 360.98 | 7.05 |
| 6 | -4 | -8  | 391.01 | 8.61 |
| 6 | -4 | -7  | 23.82  | 2.03 |
| 6 | -4 | -7  | 31.30  | 2.35 |
| 6 | -4 | -7  | 27.03  | 2.24 |
| 6 | -4 | -7  | 29.44  | 2.12 |
| 6 | -4 | -7  | 21.26  | 2.01 |
| 6 | -4 | -7  | 25.33  | 2.01 |
| 6 | -4 | -7  | 25.98  | 2.04 |
| 6 | -4 | -7  | 26.44  | 2.08 |
| 6 | -4 | -7  | 23.93  | 2.19 |
| 6 | -4 | -7  | 23.03  | 2.10 |
| 6 | -4 | -7  | 23.41  | 1.86 |
| 6 | -4 | -7  | 29.37  | 2.23 |
| 6 | -4 | -7  | 21.43  | 1.61 |
| 6 | -4 | -6  | 108.69 | 4.04 |
| 6 | -4 | -6  | 114.93 | 4.19 |

## CIF 31

|   |    |    |        |      |
|---|----|----|--------|------|
| 6 | -4 | -6 | 104.63 | 4.03 |
| 6 | -4 | -6 | 103.88 | 4.05 |
| 6 | -4 | -6 | 118.66 | 4.16 |
| 6 | -4 | -6 | 119.67 | 4.45 |
| 6 | -4 | -6 | 112.36 | 3.90 |
| 6 | -4 | -6 | 102.83 | 3.86 |
| 6 | -4 | -6 | 103.16 | 3.73 |
| 6 | -4 | -6 | 100.92 | 3.96 |
| 6 | -4 | -6 | 107.74 | 3.89 |
| 6 | -4 | -6 | 114.12 | 4.19 |
| 6 | -4 | -6 | 112.55 | 4.11 |
| 6 | -4 | -6 | 99.56  | 3.82 |
| 6 | -4 | -5 | 37.63  | 2.41 |
| 6 | -4 | -5 | 48.99  | 2.70 |
| 6 | -4 | -5 | 40.38  | 2.52 |
| 6 | -4 | -5 | 48.80  | 2.42 |
| 6 | -4 | -5 | 44.46  | 2.55 |
| 6 | -4 | -5 | 44.07  | 2.31 |
| 6 | -4 | -5 | 46.65  | 2.53 |
| 6 | -4 | -5 | 40.21  | 2.71 |
| 6 | -4 | -5 | 48.55  | 2.68 |
| 6 | -4 | -5 | 40.57  | 2.64 |
| 6 | -4 | -5 | 44.42  | 2.45 |
| 6 | -4 | -4 | 93.05  | 3.58 |
| 6 | -4 | -4 | 83.73  | 3.03 |
| 6 | -4 | -4 | 89.74  | 3.05 |
| 6 | -4 | -4 | 97.71  | 3.48 |
| 6 | -4 | -4 | 85.28  | 3.44 |
| 6 | -4 | -4 | 94.34  | 3.66 |
| 6 | -4 | -4 | 92.03  | 2.78 |
| 6 | -4 | -4 | 90.62  | 3.31 |
| 6 | -4 | -3 | 147.99 | 4.46 |
| 6 | -4 | -3 | 133.88 | 3.58 |
| 6 | -4 | -3 | 146.32 | 4.34 |
| 6 | -4 | -3 | 142.58 | 3.80 |
| 6 | -4 | -3 | 127.09 | 3.52 |
| 6 | -4 | -3 | 151.64 | 4.23 |
| 6 | -4 | -3 | 153.01 | 3.74 |
| 6 | -4 | -3 | 145.41 | 4.09 |
| 6 | -4 | -2 | 1.20   | 0.89 |
| 6 | -4 | -2 | 2.02   | 0.62 |

## CIF 31

|   |    |     |         |       |
|---|----|-----|---------|-------|
| 6 | -4 | -2  | 1.36    | 0.86  |
| 6 | -4 | -2  | 2.09    | 0.66  |
| 6 | -4 | -2  | 2.16    | 0.71  |
| 6 | -4 | -2  | 1.89    | 0.61  |
| 6 | -4 | -2  | 1.95    | 0.76  |
| 6 | -4 | -2  | 1.32    | 0.64  |
| 6 | -4 | -1  | 1190.72 | 14.58 |
| 6 | -4 | -1  | 1122.44 | 13.17 |
| 6 | -4 | -1  | 1133.52 | 13.78 |
| 6 | -4 | -1  | 1249.98 | 13.51 |
| 6 | -4 | -1  | 1099.78 | 14.15 |
| 6 | -4 | -1  | 1242.89 | 15.19 |
| 6 | -4 | -1  | 1253.53 | 14.40 |
| 6 | -4 | 0   | 796.91  | 10.77 |
| 6 | -4 | 0   | 785.59  | 9.87  |
| 6 | -4 | 0   | 737.17  | 10.30 |
| 6 | -4 | 0   | 758.95  | 9.75  |
| 6 | -4 | 0   | 825.76  | 11.07 |
| 6 | -4 | 1   | 1766.28 | 19.20 |
| 6 | -4 | 1   | 1792.89 | 18.42 |
| 6 | -4 | 1   | 1736.17 | 18.28 |
| 6 | -4 | 1   | 1773.47 | 19.67 |
| 6 | -4 | 2   | 1980.50 | 20.38 |
| 6 | -4 | 2   | 1840.14 | 19.63 |
| 6 | -4 | 3   | 269.59  | 5.32  |
| 6 | -4 | 3   | 259.80  | 5.32  |
| 6 | -4 | 4   | 2181.51 | 23.63 |
| 6 | -4 | 4   | 2533.75 | 25.75 |
| 6 | -4 | 5   | 203.95  | 5.48  |
| 6 | -4 | 6   | 9.77    | 1.37  |
| 6 | -4 | 6   | 10.26   | 1.37  |
| 6 | -4 | 7   | 103.06  | 3.79  |
| 6 | -3 | -14 | 168.75  | 3.35  |
| 6 | -3 | -14 | 137.35  | 4.34  |
| 6 | -3 | -14 | 157.86  | 3.20  |
| 6 | -3 | -14 | 148.88  | 3.12  |
| 6 | -3 | -13 | 584.56  | 9.62  |
| 6 | -3 | -13 | 595.88  | 8.90  |
| 6 | -3 | -12 | 4.68    | 1.23  |
| 6 | -3 | -12 | 4.30    | 1.39  |
| 6 | -3 | -12 | 3.06    | 1.11  |

## CIF 31

|   |    |     |        |      |
|---|----|-----|--------|------|
| 6 | -3 | -12 | 3.67   | 0.96 |
| 6 | -3 | -11 | 199.22 | 6.13 |
| 6 | -3 | -11 | 212.26 | 6.45 |
| 6 | -3 | -11 | 215.76 | 6.90 |
| 6 | -3 | -11 | 228.24 | 6.89 |
| 6 | -3 | -11 | 240.78 | 5.70 |
| 6 | -3 | -11 | 213.69 | 5.94 |
| 6 | -3 | -10 | 21.07  | 2.12 |
| 6 | -3 | -10 | 17.77  | 1.82 |
| 6 | -3 | -10 | 25.86  | 2.35 |
| 6 | -3 | -10 | 19.93  | 1.88 |
| 6 | -3 | -10 | 26.57  | 2.52 |
| 6 | -3 | -10 | 18.85  | 2.19 |
| 6 | -3 | -10 | 22.31  | 2.30 |
| 6 | -3 | -10 | 21.67  | 1.79 |
| 6 | -3 | -10 | 23.81  | 2.15 |
| 6 | -3 | -9  | 401.06 | 9.06 |
| 6 | -3 | -9  | 408.29 | 9.35 |
| 6 | -3 | -9  | 441.99 | 8.79 |
| 6 | -3 | -9  | 418.56 | 8.60 |
| 6 | -3 | -9  | 438.83 | 9.76 |
| 6 | -3 | -9  | 402.24 | 9.15 |
| 6 | -3 | -9  | 427.79 | 9.52 |
| 6 | -3 | -9  | 416.04 | 8.49 |
| 6 | -3 | -9  | 369.72 | 8.60 |
| 6 | -3 | -9  | 420.75 | 7.72 |
| 6 | -3 | -9  | 419.65 | 9.11 |
| 6 | -3 | -8  | 155.94 | 5.29 |
| 6 | -3 | -8  | 181.30 | 5.38 |
| 6 | -3 | -8  | 169.20 | 5.59 |
| 6 | -3 | -8  | 168.52 | 5.16 |
| 6 | -3 | -8  | 156.16 | 4.87 |
| 6 | -3 | -8  | 164.01 | 5.37 |
| 6 | -3 | -8  | 132.55 | 5.03 |
| 6 | -3 | -8  | 163.90 | 5.08 |
| 6 | -3 | -8  | 155.57 | 5.10 |
| 6 | -3 | -8  | 155.21 | 4.22 |
| 6 | -3 | -8  | 169.69 | 5.42 |
| 6 | -3 | -7  | 27.66  | 2.20 |
| 6 | -3 | -7  | 27.59  | 2.25 |
| 6 | -3 | -7  | 28.24  | 2.17 |

## CIF 31

|   |    |    |        |      |
|---|----|----|--------|------|
| 6 | -3 | -7 | 27.39  | 2.19 |
| 6 | -3 | -7 | 24.14  | 1.85 |
| 6 | -3 | -7 | 25.98  | 2.08 |
| 6 | -3 | -7 | 24.39  | 1.88 |
| 6 | -3 | -7 | 28.00  | 2.22 |
| 6 | -3 | -7 | 26.62  | 2.02 |
| 6 | -3 | -7 | 26.90  | 2.19 |
| 6 | -3 | -7 | 28.03  | 2.11 |
| 6 | -3 | -7 | 24.96  | 1.99 |
| 6 | -3 | -7 | 26.25  | 2.16 |
| 6 | -3 | -6 | 388.55 | 7.96 |
| 6 | -3 | -6 | 429.87 | 7.39 |
| 6 | -3 | -6 | 336.68 | 7.64 |
| 6 | -3 | -6 | 417.77 | 8.05 |
| 6 | -3 | -6 | 416.00 | 8.15 |
| 6 | -3 | -6 | 409.57 | 8.42 |
| 6 | -3 | -6 | 344.92 | 7.44 |
| 6 | -3 | -6 | 377.66 | 7.08 |
| 6 | -3 | -6 | 395.24 | 7.96 |
| 6 | -3 | -6 | 407.26 | 7.33 |
| 6 | -3 | -6 | 344.35 | 7.91 |
| 6 | -3 | -6 | 403.74 | 7.86 |
| 6 | -3 | -6 | 421.91 | 8.34 |
| 6 | -3 | -6 | 425.11 | 8.26 |
| 6 | -3 | -6 | 408.02 | 7.73 |
| 6 | -3 | -5 | 40.14  | 2.42 |
| 6 | -3 | -5 | 35.51  | 1.95 |
| 6 | -3 | -5 | 34.58  | 2.72 |
| 6 | -3 | -5 | 34.05  | 2.25 |
| 6 | -3 | -5 | 38.61  | 2.34 |
| 6 | -3 | -5 | 34.85  | 2.14 |
| 6 | -3 | -5 | 41.97  | 2.04 |
| 6 | -3 | -5 | 37.89  | 2.36 |
| 6 | -3 | -5 | 41.19  | 2.02 |
| 6 | -3 | -5 | 38.98  | 2.21 |
| 6 | -3 | -5 | 31.08  | 2.30 |
| 6 | -3 | -5 | 41.71  | 2.58 |
| 6 | -3 | -5 | 38.03  | 2.13 |
| 6 | -3 | -4 | 15.06  | 1.57 |
| 6 | -3 | -4 | 14.52  | 1.21 |
| 6 | -3 | -4 | 17.52  | 1.76 |

## CIF 31

|   |    |     |         |       |
|---|----|-----|---------|-------|
| 6 | -3 | -4  | 13.84   | 1.47  |
| 6 | -3 | -4  | 13.30   | 1.50  |
| 6 | -3 | -4  | 13.05   | 1.34  |
| 6 | -3 | -4  | 12.89   | 1.12  |
| 6 | -3 | -4  | 13.16   | 1.11  |
| 6 | -3 | -4  | 13.34   | 1.32  |
| 6 | -3 | -4  | 14.46   | 1.50  |
| 6 | -3 | -4  | 14.96   | 1.71  |
| 6 | -3 | -4  | 12.70   | 1.25  |
| 6 | -3 | -3  | 136.36  | 3.21  |
| 6 | -3 | -3  | 130.00  | 3.29  |
| 6 | -3 | -3  | 118.89  | 3.05  |
| 6 | -3 | -3  | 124.25  | 3.57  |
| 6 | -3 | -3  | 126.46  | 3.96  |
| 6 | -3 | -3  | 122.14  | 3.52  |
| 6 | -3 | -2  | 589.19  | 7.38  |
| 6 | -3 | -2  | 584.97  | 9.14  |
| 6 | -3 | -2  | 600.66  | 9.23  |
| 6 | -3 | -1  | 134.18  | 4.08  |
| 6 | -3 | -1  | 130.62  | 3.84  |
| 6 | -3 | -1  | 129.46  | 3.28  |
| 6 | -3 | -1  | 140.88  | 3.70  |
| 6 | -3 | -1  | 133.91  | 3.94  |
| 6 | -3 | 0   | 30.06   | 1.86  |
| 6 | -3 | 0   | 29.07   | 1.56  |
| 6 | -3 | 0   | 27.44   | 1.66  |
| 6 | -3 | 0   | 24.67   | 1.89  |
| 6 | -3 | 1   | 779.42  | 10.75 |
| 6 | -3 | 1   | 790.66  | 10.53 |
| 6 | -3 | 2   | 70.19   | 2.75  |
| 6 | -3 | 3   | 278.58  | 5.67  |
| 6 | -3 | 4   | 551.31  | 8.42  |
| 6 | -3 | 5   | 51.47   | 2.69  |
| 6 | -3 | 6   | 2750.81 | 29.00 |
| 6 | -3 | 7   | 27.14   | 1.91  |
| 6 | -2 | -15 | 196.23  | 4.54  |
| 6 | -2 | -14 | 26.06   | 1.77  |
| 6 | -2 | -14 | 25.32   | 1.35  |
| 6 | -2 | -14 | 28.49   | 2.24  |
| 6 | -2 | -14 | 21.60   | 1.30  |
| 6 | -2 | -13 | 90.03   | 3.86  |

## CIF 31

|   |    |     |        |      |
|---|----|-----|--------|------|
| 6 | -2 | -13 | 91.96  | 4.31 |
| 6 | -2 | -13 | 96.19  | 3.15 |
| 6 | -2 | -12 | 52.08  | 3.29 |
| 6 | -2 | -12 | 57.23  | 3.61 |
| 6 | -2 | -12 | 50.11  | 3.23 |
| 6 | -2 | -12 | 59.76  | 2.70 |
| 6 | -2 | -11 | 382.61 | 9.10 |
| 6 | -2 | -11 | 350.68 | 9.14 |
| 6 | -2 | -11 | 381.28 | 8.33 |
| 6 | -2 | -11 | 425.94 | 9.58 |
| 6 | -2 | -11 | 436.43 | 7.84 |
| 6 | -2 | -11 | 382.04 | 8.51 |
| 6 | -2 | -10 | 1.91   | 1.06 |
| 6 | -2 | -10 | 1.76   | 0.90 |
| 6 | -2 | -10 | 1.82   | 1.10 |
| 6 | -2 | -10 | 1.88   | 1.21 |
| 6 | -2 | -10 | 2.52   | 1.31 |
| 6 | -2 | -10 | 2.87   | 1.27 |
| 6 | -2 | -10 | 1.17   | 0.90 |
| 6 | -2 | -10 | 1.50   | 0.89 |
| 6 | -2 | -10 | 2.56   | 1.07 |
| 6 | -2 | -9  | 60.69  | 3.43 |
| 6 | -2 | -9  | 62.72  | 3.61 |
| 6 | -2 | -9  | 59.64  | 3.03 |
| 6 | -2 | -9  | 62.37  | 3.32 |
| 6 | -2 | -9  | 48.07  | 3.16 |
| 6 | -2 | -9  | 54.37  | 3.30 |
| 6 | -2 | -9  | 56.35  | 3.39 |
| 6 | -2 | -9  | 56.21  | 3.17 |
| 6 | -2 | -9  | 60.33  | 2.66 |
| 6 | -2 | -9  | 60.31  | 3.33 |
| 6 | -2 | -8  | 272.64 | 7.01 |
| 6 | -2 | -8  | 281.41 | 6.59 |
| 6 | -2 | -8  | 272.66 | 6.36 |
| 6 | -2 | -8  | 241.94 | 6.22 |
| 6 | -2 | -8  | 278.35 | 7.32 |
| 6 | -2 | -8  | 285.57 | 6.94 |
| 6 | -2 | -8  | 276.00 | 7.25 |
| 6 | -2 | -8  | 279.20 | 6.34 |
| 6 | -2 | -8  | 252.17 | 6.73 |
| 6 | -2 | -8  | 258.04 | 6.74 |



## CIF 31

|   |    |    |         |       |
|---|----|----|---------|-------|
| 6 | -2 | -8 | 253.81  | 6.38  |
| 6 | -2 | -8 | 270.38  | 6.95  |
| 6 | -2 | -7 | 443.37  | 8.94  |
| 6 | -2 | -7 | 496.46  | 8.65  |
| 6 | -2 | -7 | 498.43  | 8.86  |
| 6 | -2 | -7 | 442.89  | 8.86  |
| 6 | -2 | -7 | 469.13  | 9.39  |
| 6 | -2 | -7 | 463.96  | 8.62  |
| 6 | -2 | -7 | 487.66  | 9.19  |
| 6 | -2 | -7 | 478.03  | 8.93  |
| 6 | -2 | -7 | 468.14  | 9.14  |
| 6 | -2 | -7 | 488.44  | 9.02  |
| 6 | -2 | -7 | 450.29  | 8.75  |
| 6 | -2 | -7 | 453.24  | 8.90  |
| 6 | -2 | -7 | 454.30  | 9.06  |
| 6 | -2 | -7 | 462.97  | 8.53  |
| 6 | -2 | -7 | 465.86  | 9.19  |
| 6 | -2 | -6 | 6.11    | 1.14  |
| 6 | -2 | -6 | 4.33    | 2.82  |
| 6 | -2 | -6 | 4.14    | 1.20  |
| 6 | -2 | -6 | 8.93    | 1.33  |
| 6 | -2 | -6 | 4.00    | 1.50  |
| 6 | -2 | -6 | 7.14    | 1.20  |
| 6 | -2 | -6 | 4.63    | 1.04  |
| 6 | -2 | -6 | 3.92    | 0.74  |
| 6 | -2 | -6 | 4.67    | 1.11  |
| 6 | -2 | -6 | 2.44    | 2.76  |
| 6 | -2 | -6 | 5.21    | 1.05  |
| 6 | -2 | -6 | 5.76    | 1.70  |
| 6 | -2 | -6 | 4.29    | 1.00  |
| 6 | -2 | -6 | 5.19    | 1.38  |
| 6 | -2 | -6 | 4.13    | 1.00  |
| 6 | -2 | -6 | 4.53    | 0.94  |
| 6 | -2 | -5 | 1767.95 | 19.03 |
| 6 | -2 | -5 | 1406.06 | 20.70 |
| 6 | -2 | -5 | 1592.03 | 20.10 |
| 6 | -2 | -5 | 1804.24 | 19.95 |
| 6 | -2 | -5 | 1727.73 | 19.68 |
| 6 | -2 | -5 | 1785.82 | 19.66 |
| 6 | -2 | -5 | 1838.48 | 20.50 |
| 6 | -2 | -5 | 1833.48 | 19.50 |

## CIF 31

|   |    |    |         |       |
|---|----|----|---------|-------|
| 6 | -2 | -5 | 1568.30 | 20.43 |
| 6 | -2 | -5 | 1715.91 | 19.90 |
| 6 | -2 | -5 | 1726.01 | 20.65 |
| 6 | -2 | -5 | 1739.25 | 18.93 |
| 6 | -2 | -5 | 1821.99 | 20.46 |
| 6 | -2 | -4 | 48.41   | 2.53  |
| 6 | -2 | -4 | 56.78   | 3.17  |
| 6 | -2 | -4 | 48.69   | 2.14  |
| 6 | -2 | -4 | 55.48   | 2.66  |
| 6 | -2 | -4 | 42.07   | 2.24  |
| 6 | -2 | -4 | 47.28   | 2.28  |
| 6 | -2 | -4 | 47.71   | 2.18  |
| 6 | -2 | -4 | 47.95   | 2.44  |
| 6 | -2 | -4 | 46.43   | 2.66  |
| 6 | -2 | -4 | 47.78   | 2.12  |
| 6 | -2 | -4 | 53.22   | 2.55  |
| 6 | -2 | -3 | 285.76  | 6.18  |
| 6 | -2 | -3 | 277.60  | 5.12  |
| 6 | -2 | -3 | 305.06  | 5.83  |
| 6 | -2 | -3 | 297.52  | 5.44  |
| 6 | -2 | -3 | 294.70  | 4.52  |
| 6 | -2 | -3 | 287.65  | 5.94  |
| 6 | -2 | -3 | 308.99  | 6.74  |
| 6 | -2 | -3 | 288.42  | 5.29  |
| 6 | -2 | -3 | 306.64  | 6.12  |
| 6 | -2 | -2 | 426.14  | 7.55  |
| 6 | -2 | -2 | 433.76  | 6.33  |
| 6 | -2 | -2 | 419.17  | 6.53  |
| 6 | -2 | -2 | 428.35  | 7.16  |
| 6 | -2 | -1 | 76.31   | 2.29  |
| 6 | -2 | -1 | 72.59   | 2.40  |
| 6 | -2 | -1 | 79.77   | 2.86  |
| 6 | -2 | 0  | 2739.42 | 27.15 |
| 6 | -2 | 0  | 2702.27 | 25.55 |
| 6 | -2 | 0  | 2676.70 | 26.77 |
| 6 | -2 | 0  | 2761.20 | 27.50 |
| 6 | -2 | 1  | 1348.59 | 15.91 |
| 6 | -2 | 1  | 1315.47 | 16.33 |
| 6 | -2 | 1  | 1336.50 | 16.22 |
| 6 | -2 | 2  | 1654.01 | 18.41 |
| 6 | -2 | 2  | 1565.20 | 18.95 |

## CIF 31

|   |    |     |        |       |
|---|----|-----|--------|-------|
| 6 | -2 | 3   | 171.13 | 4.46  |
| 6 | -2 | 3   | 172.75 | 4.97  |
| 6 | -2 | 4   | 12.37  | 1.31  |
| 6 | -2 | 4   | 11.75  | 1.47  |
| 6 | -2 | 5   | 933.80 | 13.57 |
| 6 | -2 | 6   | 78.46  | 3.19  |
| 6 | -1 | -15 | 28.67  | 1.55  |
| 6 | -1 | -15 | 32.38  | 2.01  |
| 6 | -1 | -14 | 37.08  | 2.43  |
| 6 | -1 | -14 | 36.01  | 1.69  |
| 6 | -1 | -13 | 169.86 | 5.74  |
| 6 | -1 | -13 | 178.13 | 5.48  |
| 6 | -1 | -12 | 75.67  | 4.13  |
| 6 | -1 | -12 | 72.42  | 3.96  |
| 6 | -1 | -12 | 74.62  | 3.64  |
| 6 | -1 | -12 | 75.12  | 3.02  |
| 6 | -1 | -11 | 223.11 | 6.89  |
| 6 | -1 | -11 | 242.23 | 7.39  |
| 6 | -1 | -11 | 241.78 | 6.45  |
| 6 | -1 | -11 | 250.69 | 7.52  |
| 6 | -1 | -11 | 229.56 | 6.69  |
| 6 | -1 | -11 | 230.26 | 5.48  |
| 6 | -1 | -10 | 1.36   | 1.14  |
| 6 | -1 | -10 | 5.00   | 1.19  |
| 6 | -1 | -10 | 1.26   | 1.34  |
| 6 | -1 | -10 | 1.63   | 1.10  |
| 6 | -1 | -10 | 1.81   | 1.26  |
| 6 | -1 | -10 | 1.74   | 1.09  |
| 6 | -1 | -10 | 1.95   | 0.83  |
| 6 | -1 | -10 | 1.61   | 1.11  |
| 6 | -1 | -9  | 156.76 | 5.58  |
| 6 | -1 | -9  | 181.98 | 5.48  |
| 6 | -1 | -9  | 165.12 | 5.22  |
| 6 | -1 | -9  | 170.91 | 4.93  |
| 6 | -1 | -9  | 173.44 | 5.59  |
| 6 | -1 | -9  | 179.54 | 5.93  |
| 6 | -1 | -9  | 174.36 | 5.96  |
| 6 | -1 | -9  | 141.33 | 5.16  |
| 6 | -1 | -9  | 161.79 | 5.61  |
| 6 | -1 | -9  | 162.42 | 5.49  |
| 6 | -1 | -9  | 167.39 | 5.60  |

## CIF 31

|   |    |    |         |       |
|---|----|----|---------|-------|
| 6 | -1 | -8 | 680.27  | 10.91 |
| 6 | -1 | -8 | 634.39  | 10.53 |
| 6 | -1 | -8 | 649.58  | 11.03 |
| 6 | -1 | -8 | 663.91  | 11.88 |
| 6 | -1 | -8 | 623.41  | 10.24 |
| 6 | -1 | -8 | 631.48  | 11.17 |
| 6 | -1 | -8 | 654.87  | 11.57 |
| 6 | -1 | -8 | 636.97  | 10.92 |
| 6 | -1 | -8 | 572.13  | 10.56 |
| 6 | -1 | -8 | 604.90  | 11.10 |
| 6 | -1 | -8 | 648.35  | 11.51 |
| 6 | -1 | -8 | 575.63  | 10.81 |
| 6 | -1 | -7 | 1051.36 | 14.15 |
| 6 | -1 | -7 | 1052.20 | 14.97 |
| 6 | -1 | -7 | 939.47  | 14.57 |
| 6 | -1 | -7 | 1069.71 | 14.04 |
| 6 | -1 | -7 | 1021.04 | 14.68 |
| 6 | -1 | -7 | 1100.32 | 15.21 |
| 6 | -1 | -7 | 1093.66 | 15.17 |
| 6 | -1 | -7 | 945.48  | 13.66 |
| 6 | -1 | -7 | 1106.84 | 15.17 |
| 6 | -1 | -7 | 961.96  | 14.28 |
| 6 | -1 | -7 | 1082.47 | 15.20 |
| 6 | -1 | -7 | 980.32  | 13.50 |
| 6 | -1 | -7 | 906.62  | 13.05 |
| 6 | -1 | -7 | 1018.11 | 14.87 |
| 6 | -1 | -6 | 7.14    | 1.25  |
| 6 | -1 | -6 | 13.25   | 1.43  |
| 6 | -1 | -6 | 9.75    | 3.12  |
| 6 | -1 | -6 | 9.36    | 1.34  |
| 6 | -1 | -6 | 8.96    | 1.61  |
| 6 | -1 | -6 | 8.90    | 1.21  |
| 6 | -1 | -6 | 12.20   | 2.88  |
| 6 | -1 | -6 | 6.97    | 1.06  |
| 6 | -1 | -6 | 8.09    | 1.57  |
| 6 | -1 | -6 | 10.31   | 1.18  |
| 6 | -1 | -6 | 9.17    | 1.28  |
| 6 | -1 | -6 | 9.25    | 1.61  |
| 6 | -1 | -6 | 9.26    | 1.30  |
| 6 | -1 | -6 | 8.06    | 1.06  |
| 6 | -1 | -6 | 9.85    | 1.37  |

## CIF 31

|   |    |    |         |       |
|---|----|----|---------|-------|
| 6 | -1 | -5 | 955.88  | 12.97 |
| 6 | -1 | -5 | 712.27  | 13.70 |
| 6 | -1 | -5 | 869.42  | 11.96 |
| 6 | -1 | -5 | 927.80  | 12.59 |
| 6 | -1 | -5 | 959.13  | 13.58 |
| 6 | -1 | -5 | 883.71  | 12.27 |
| 6 | -1 | -5 | 879.57  | 11.99 |
| 6 | -1 | -5 | 932.40  | 13.07 |
| 6 | -1 | -5 | 1110.14 | 12.57 |
| 6 | -1 | -5 | 895.72  | 13.60 |
| 6 | -1 | -5 | 914.85  | 11.51 |
| 6 | -1 | -5 | 930.68  | 12.60 |
| 6 | -1 | -5 | 922.22  | 13.45 |
| 6 | -1 | -5 | 864.24  | 11.34 |
| 6 | -1 | -5 | 975.68  | 13.22 |
| 6 | -1 | -4 | 243.71  | 5.55  |
| 6 | -1 | -4 | 244.37  | 6.79  |
| 6 | -1 | -4 | 283.56  | 5.48  |
| 6 | -1 | -4 | 256.89  | 5.72  |
| 6 | -1 | -4 | 243.86  | 5.29  |
| 6 | -1 | -4 | 245.35  | 5.20  |
| 6 | -1 | -4 | 254.88  | 5.83  |
| 6 | -1 | -4 | 239.29  | 4.79  |
| 6 | -1 | -4 | 263.87  | 5.59  |
| 6 | -1 | -4 | 237.04  | 4.67  |
| 6 | -1 | -4 | 264.66  | 5.87  |
| 6 | -1 | -3 | 0.42    | 0.64  |
| 6 | -1 | -3 | 1.49    | 1.07  |
| 6 | -1 | -3 | -0.10   | 0.85  |
| 6 | -1 | -3 | 0.69    | 0.62  |
| 6 | -1 | -3 | 2.05    | 0.65  |
| 6 | -1 | -3 | 0.60    | 0.69  |
| 6 | -1 | -3 | -0.02   | 0.41  |
| 6 | -1 | -3 | 0.32    | 0.49  |
| 6 | -1 | -3 | -0.04   | 0.84  |
| 6 | -1 | -3 | 2.88    | 0.76  |
| 6 | -1 | -2 | 772.03  | 10.01 |
| 6 | -1 | -2 | 744.77  | 9.86  |
| 6 | -1 | -2 | 763.20  | 10.26 |
| 6 | -1 | -2 | 748.99  | 9.05  |
| 6 | -1 | -2 | 738.81  | 10.31 |

## CIF 31

|   |    |     |        |       |
|---|----|-----|--------|-------|
| 6 | -1 | -1  | 7.99   | 1.03  |
| 6 | -1 | -1  | 8.09   | 0.95  |
| 6 | -1 | -1  | 8.71   | 1.23  |
| 6 | -1 | -1  | 7.13   | 0.93  |
| 6 | -1 | -1  | 7.98   | 0.78  |
| 6 | -1 | -1  | 8.40   | 1.18  |
| 6 | -1 | 0   | 540.30 | 8.46  |
| 6 | -1 | 0   | 542.06 | 7.59  |
| 6 | -1 | 0   | 558.20 | 8.87  |
| 6 | -1 | 1   | 92.19  | 3.18  |
| 6 | -1 | 1   | 90.53  | 2.67  |
| 6 | -1 | 1   | 84.97  | 2.81  |
| 6 | -1 | 2   | 830.73 | 10.37 |
| 6 | -1 | 2   | 823.54 | 10.94 |
| 6 | -1 | 2   | 880.83 | 12.60 |
| 6 | -1 | 2   | 880.44 | 11.85 |
| 6 | -1 | 3   | 166.19 | 4.63  |
| 6 | -1 | 3   | 158.21 | 4.32  |
| 6 | -1 | 4   | 863.27 | 12.22 |
| 6 | -1 | 4   | 873.97 | 13.13 |
| 6 | -1 | 5   | 5.85   | 1.05  |
| 6 | -1 | 5   | 4.95   | 1.10  |
| 6 | 0  | -15 | 291.08 | 5.92  |
| 6 | 0  | -15 | 284.25 | 6.26  |
| 6 | 0  | -14 | 28.11  | 2.29  |
| 6 | 0  | -14 | 26.50  | 2.33  |
| 6 | 0  | -14 | 28.37  | 1.49  |
| 6 | 0  | -13 | 124.72 | 5.09  |
| 6 | 0  | -13 | 116.60 | 4.62  |
| 6 | 0  | -13 | 122.78 | 5.10  |
| 6 | 0  | -13 | 113.08 | 4.38  |
| 6 | 0  | -13 | 126.09 | 3.57  |
| 6 | 0  | -12 | 94.06  | 4.71  |
| 6 | 0  | -12 | 94.65  | 4.08  |
| 6 | 0  | -12 | 96.54  | 4.72  |
| 6 | 0  | -12 | 90.96  | 4.23  |
| 6 | 0  | -12 | 83.31  | 3.10  |
| 6 | 0  | -11 | 122.60 | 5.33  |
| 6 | 0  | -11 | 114.54 | 5.09  |
| 6 | 0  | -11 | 105.71 | 4.91  |
| 6 | 0  | -11 | 116.54 | 4.96  |

## CIF 31

|   |   |     |        |       |
|---|---|-----|--------|-------|
| 6 | 0 | -10 | 132.59 | 5.39  |
| 6 | 0 | -10 | 125.48 | 4.81  |
| 6 | 0 | -10 | 121.34 | 4.91  |
| 6 | 0 | -10 | 130.53 | 5.25  |
| 6 | 0 | -10 | 124.90 | 5.21  |
| 6 | 0 | -10 | 128.64 | 5.19  |
| 6 | 0 | -9  | 0.66   | 1.00  |
| 6 | 0 | -9  | 2.22   | 0.96  |
| 6 | 0 | -9  | 1.96   | 1.19  |
| 6 | 0 | -9  | 0.56   | 1.07  |
| 6 | 0 | -9  | 0.07   | 0.70  |
| 6 | 0 | -9  | 0.54   | 1.12  |
| 6 | 0 | -9  | 1.52   | 0.98  |
| 6 | 0 | -9  | 2.14   | 1.08  |
| 6 | 0 | -9  | 0.62   | 0.88  |
| 6 | 0 | -9  | 0.11   | 1.08  |
| 6 | 0 | -8  | 2.35   | 1.09  |
| 6 | 0 | -8  | 1.95   | 1.09  |
| 6 | 0 | -8  | 2.35   | 1.41  |
| 6 | 0 | -8  | 2.12   | 1.18  |
| 6 | 0 | -8  | 3.08   | 0.95  |
| 6 | 0 | -8  | 2.13   | 1.13  |
| 6 | 0 | -8  | 1.33   | 1.05  |
| 6 | 0 | -8  | 1.88   | 1.41  |
| 6 | 0 | -8  | 1.90   | 0.87  |
| 6 | 0 | -8  | 2.52   | 1.17  |
| 6 | 0 | -8  | 4.42   | 1.01  |
| 6 | 0 | -8  | 1.78   | 0.98  |
| 6 | 0 | -8  | 1.17   | 1.09  |
| 6 | 0 | -8  | 2.79   | 0.91  |
| 6 | 0 | -8  | 2.26   | 1.10  |
| 6 | 0 | -7  | 612.30 | 10.75 |
| 6 | 0 | -7  | 655.05 | 10.56 |
| 6 | 0 | -7  | 686.37 | 11.87 |
| 6 | 0 | -7  | 630.09 | 11.55 |
| 6 | 0 | -7  | 625.53 | 11.26 |
| 6 | 0 | -7  | 635.94 | 10.09 |
| 6 | 0 | -7  | 654.87 | 10.81 |
| 6 | 0 | -7  | 723.69 | 12.08 |
| 6 | 0 | -7  | 570.74 | 9.70  |
| 6 | 0 | -7  | 652.31 | 11.49 |

## CIF 31

|   |   |    |         |       |
|---|---|----|---------|-------|
| 6 | 0 | -7 | 653.25  | 10.47 |
| 6 | 0 | -7 | 584.92  | 9.87  |
| 6 | 0 | -7 | 584.63  | 10.46 |
| 6 | 0 | -7 | 641.09  | 11.32 |
| 6 | 0 | -7 | 648.59  | 10.59 |
| 6 | 0 | -6 | 1691.99 | 20.31 |
| 6 | 0 | -6 | 1594.05 | 22.21 |
| 6 | 0 | -6 | 1719.14 | 19.81 |
| 6 | 0 | -6 | 1835.51 | 20.03 |
| 6 | 0 | -6 | 1678.20 | 20.59 |
| 6 | 0 | -6 | 1790.45 | 20.23 |
| 6 | 0 | -6 | 1718.22 | 20.53 |
| 6 | 0 | -6 | 1582.81 | 21.45 |
| 6 | 0 | -6 | 1766.83 | 19.17 |
| 6 | 0 | -6 | 1815.10 | 21.66 |
| 6 | 0 | -6 | 1694.15 | 19.23 |
| 6 | 0 | -6 | 1578.56 | 19.48 |
| 6 | 0 | -6 | 1787.50 | 21.17 |
| 6 | 0 | -6 | 1766.63 | 20.60 |
| 6 | 0 | -6 | 1613.08 | 20.50 |
| 6 | 0 | -5 | 24.52   | 1.83  |
| 6 | 0 | -5 | 19.07   | 2.72  |
| 6 | 0 | -5 | 17.68   | 1.61  |
| 6 | 0 | -5 | 19.67   | 1.67  |
| 6 | 0 | -5 | 21.83   | 1.95  |
| 6 | 0 | -5 | 21.81   | 1.55  |
| 6 | 0 | -5 | 21.32   | 1.76  |
| 6 | 0 | -5 | 20.67   | 2.15  |
| 6 | 0 | -5 | 24.41   | 1.72  |
| 6 | 0 | -5 | 18.86   | 1.57  |
| 6 | 0 | -5 | 26.10   | 1.95  |
| 6 | 0 | -4 | 0.63    | 0.63  |
| 6 | 0 | -4 | 2.08    | 1.53  |
| 6 | 0 | -4 | 2.09    | 0.91  |
| 6 | 0 | -4 | 0.20    | 0.75  |
| 6 | 0 | -4 | 1.16    | 0.78  |
| 6 | 0 | -4 | 0.18    | 0.69  |
| 6 | 0 | -4 | -0.06   | 0.52  |
| 6 | 0 | -4 | 0.55    | 0.88  |
| 6 | 0 | -4 | 0.71    | 0.67  |
| 6 | 0 | -4 | 0.15    | 0.58  |



## CIF 31

|   |   |     |         |       |
|---|---|-----|---------|-------|
| 6 | 0 | -3  | 55.46   | 2.41  |
| 6 | 0 | -3  | 56.23   | 3.46  |
| 6 | 0 | -3  | 60.50   | 2.53  |
| 6 | 0 | -3  | 67.06   | 2.86  |
| 6 | 0 | -3  | 61.38   | 2.68  |
| 6 | 0 | -3  | 50.50   | 2.18  |
| 6 | 0 | -3  | 58.52   | 2.28  |
| 6 | 0 | -3  | 46.93   | 2.69  |
| 6 | 0 | -3  | 54.94   | 2.53  |
| 6 | 0 | -2  | 762.23  | 10.41 |
| 6 | 0 | -2  | 728.73  | 10.21 |
| 6 | 0 | -2  | 800.10  | 11.19 |
| 6 | 0 | -2  | 752.26  | 10.77 |
| 6 | 0 | -2  | 753.86  | 9.78  |
| 6 | 0 | -2  | 726.78  | 11.48 |
| 6 | 0 | -2  | 760.91  | 9.72  |
| 6 | 0 | -2  | 764.93  | 11.01 |
| 6 | 0 | -1  | 78.90   | 2.81  |
| 6 | 0 | -1  | 99.12   | 4.37  |
| 6 | 0 | -1  | 88.67   | 2.99  |
| 6 | 0 | -1  | 75.09   | 3.28  |
| 6 | 0 | -1  | 97.47   | 2.81  |
| 6 | 0 | -1  | 89.90   | 3.31  |
| 6 | 0 | 0   | 4.85    | 0.80  |
| 6 | 0 | 0   | 4.87    | 0.90  |
| 6 | 0 | 0   | 5.35    | 1.19  |
| 6 | 0 | 0   | 4.67    | 0.74  |
| 6 | 0 | 0   | 5.64    | 1.11  |
| 6 | 0 | 1   | 1324.28 | 15.03 |
| 6 | 0 | 1   | 1308.04 | 14.13 |
| 6 | 0 | 2   | 2.36    | 0.78  |
| 6 | 0 | 2   | 2.64    | 0.99  |
| 6 | 0 | 3   | 2727.32 | 27.12 |
| 6 | 0 | 3   | 2796.03 | 29.78 |
| 6 | 0 | 4   | 190.23  | 5.68  |
| 6 | 0 | 5   | 135.56  | 4.35  |
| 6 | 1 | -15 | 37.70   | 2.24  |
| 6 | 1 | -14 | 18.00   | 2.01  |
| 6 | 1 | -14 | 18.12   | 1.92  |
| 6 | 1 | -14 | 20.14   | 1.21  |
| 6 | 1 | -13 | 42.39   | 3.12  |

## CIF 31

|   |   |     |        |       |
|---|---|-----|--------|-------|
| 6 | 1 | -13 | 46.60  | 2.84  |
| 6 | 1 | -13 | 44.13  | 3.01  |
| 6 | 1 | -13 | 39.23  | 2.94  |
| 6 | 1 | -13 | 37.78  | 2.70  |
| 6 | 1 | -13 | 44.46  | 2.03  |
| 6 | 1 | -12 | 71.68  | 4.13  |
| 6 | 1 | -12 | 79.99  | 3.97  |
| 6 | 1 | -12 | 77.17  | 4.36  |
| 6 | 1 | -12 | 66.19  | 3.96  |
| 6 | 1 | -12 | 75.43  | 4.07  |
| 6 | 1 | -12 | 83.26  | 2.95  |
| 6 | 1 | -11 | 78.31  | 3.68  |
| 6 | 1 | -11 | 67.43  | 3.35  |
| 6 | 1 | -11 | 70.14  | 4.00  |
| 6 | 1 | -11 | 63.57  | 3.75  |
| 6 | 1 | -11 | 66.97  | 3.90  |
| 6 | 1 | -10 | 358.86 | 8.80  |
| 6 | 1 | -10 | 375.11 | 8.37  |
| 6 | 1 | -10 | 360.32 | 8.20  |
| 6 | 1 | -10 | 359.21 | 8.55  |
| 6 | 1 | -10 | 364.57 | 8.86  |
| 6 | 1 | -10 | 367.19 | 9.42  |
| 6 | 1 | -10 | 364.50 | 8.30  |
| 6 | 1 | -10 | 363.12 | 8.95  |
| 6 | 1 | -10 | 369.53 | 9.14  |
| 6 | 1 | -9  | 774.90 | 13.24 |
| 6 | 1 | -9  | 786.26 | 12.89 |
| 6 | 1 | -9  | 743.15 | 13.14 |
| 6 | 1 | -9  | 793.04 | 13.12 |
| 6 | 1 | -9  | 791.18 | 13.13 |
| 6 | 1 | -9  | 754.29 | 13.18 |
| 6 | 1 | -9  | 772.72 | 13.83 |
| 6 | 1 | -9  | 728.89 | 13.81 |
| 6 | 1 | -9  | 745.07 | 12.19 |
| 6 | 1 | -8  | 21.50  | 2.08  |
| 6 | 1 | -8  | 18.25  | 1.97  |
| 6 | 1 | -8  | 21.16  | 2.28  |
| 6 | 1 | -8  | 21.04  | 1.72  |
| 6 | 1 | -8  | 25.26  | 2.25  |
| 6 | 1 | -8  | 21.09  | 2.46  |
| 6 | 1 | -8  | 15.35  | 1.69  |

## CIF 31

|   |   |    |         |       |
|---|---|----|---------|-------|
| 6 | 1 | -8 | 22.21   | 2.24  |
| 6 | 1 | -8 | 16.46   | 2.00  |
| 6 | 1 | -8 | 19.94   | 1.85  |
| 6 | 1 | -8 | 19.23   | 1.87  |
| 6 | 1 | -8 | 16.44   | 1.87  |
| 6 | 1 | -8 | 19.02   | 1.86  |
| 6 | 1 | -7 | 884.38  | 13.38 |
| 6 | 1 | -7 | 881.45  | 13.32 |
| 6 | 1 | -7 | 957.70  | 14.79 |
| 6 | 1 | -7 | 869.62  | 14.29 |
| 6 | 1 | -7 | 1029.56 | 14.90 |
| 6 | 1 | -7 | 887.30  | 12.56 |
| 6 | 1 | -7 | 933.61  | 14.02 |
| 6 | 1 | -7 | 876.26  | 14.61 |
| 6 | 1 | -7 | 849.86  | 12.95 |
| 6 | 1 | -7 | 982.67  | 15.24 |
| 6 | 1 | -7 | 930.25  | 13.82 |
| 6 | 1 | -7 | 884.19  | 12.95 |
| 6 | 1 | -7 | 878.71  | 13.18 |
| 6 | 1 | -7 | 950.06  | 14.04 |
| 6 | 1 | -6 | 45.79   | 2.54  |
| 6 | 1 | -6 | 38.45   | 3.48  |
| 6 | 1 | -6 | 40.34   | 2.49  |
| 6 | 1 | -6 | 54.68   | 2.99  |
| 6 | 1 | -6 | 41.23   | 2.34  |
| 6 | 1 | -6 | 44.21   | 2.65  |
| 6 | 1 | -6 | 48.89   | 3.84  |
| 6 | 1 | -6 | 44.54   | 3.04  |
| 6 | 1 | -6 | 36.67   | 2.28  |
| 6 | 1 | -6 | 41.66   | 2.32  |
| 6 | 1 | -6 | 42.33   | 2.75  |
| 6 | 1 | -6 | 44.80   | 2.91  |
| 6 | 1 | -5 | 619.23  | 9.77  |
| 6 | 1 | -5 | 553.93  | 11.80 |
| 6 | 1 | -5 | 629.74  | 10.08 |
| 6 | 1 | -5 | 690.63  | 10.88 |
| 6 | 1 | -5 | 681.83  | 10.18 |
| 6 | 1 | -5 | 677.24  | 10.76 |
| 6 | 1 | -5 | 655.78  | 10.34 |
| 6 | 1 | -5 | 554.48  | 11.75 |
| 6 | 1 | -5 | 698.42  | 11.56 |

## CIF 31

|   |   |    |        |       |
|---|---|----|--------|-------|
| 6 | 1 | -5 | 573.78 | 9.24  |
| 6 | 1 | -5 | 612.11 | 9.70  |
| 6 | 1 | -5 | 616.90 | 10.75 |
| 6 | 1 | -5 | 593.28 | 10.86 |
| 6 | 1 | -4 | 12.38  | 1.26  |
| 6 | 1 | -4 | 19.07  | 1.70  |
| 6 | 1 | -4 | 7.76   | 2.30  |
| 6 | 1 | -4 | 8.58   | 1.22  |
| 6 | 1 | -4 | 18.26  | 1.65  |
| 6 | 1 | -4 | 17.53  | 1.24  |
| 6 | 1 | -4 | 15.32  | 1.57  |
| 6 | 1 | -4 | 13.62  | 1.42  |
| 6 | 1 | -4 | 14.98  | 1.83  |
| 6 | 1 | -4 | 9.37   | 1.02  |
| 6 | 1 | -4 | 16.47  | 1.49  |
| 6 | 1 | -4 | 10.60  | 1.49  |
| 6 | 1 | -4 | 9.37   | 1.53  |
| 6 | 1 | -3 | 212.50 | 4.74  |
| 6 | 1 | -3 | 205.43 | 5.11  |
| 6 | 1 | -3 | 203.18 | 5.11  |
| 6 | 1 | -3 | 216.24 | 5.31  |
| 6 | 1 | -3 | 203.65 | 4.99  |
| 6 | 1 | -3 | 191.62 | 5.66  |
| 6 | 1 | -3 | 198.41 | 5.51  |
| 6 | 1 | -3 | 204.01 | 4.82  |
| 6 | 1 | -3 | 203.12 | 5.06  |
| 6 | 1 | -2 | 477.96 | 7.38  |
| 6 | 1 | -2 | 440.20 | 10.55 |
| 6 | 1 | -2 | 507.48 | 8.34  |
| 6 | 1 | -2 | 520.17 | 8.79  |
| 6 | 1 | -2 | 506.45 | 8.06  |
| 6 | 1 | -2 | 423.55 | 7.76  |
| 6 | 1 | -2 | 447.12 | 9.15  |
| 6 | 1 | -2 | 436.94 | 8.41  |
| 6 | 1 | -2 | 519.45 | 7.99  |
| 6 | 1 | -2 | 510.19 | 8.58  |
| 6 | 1 | -1 | 861.68 | 14.68 |
| 6 | 1 | -1 | 911.22 | 12.08 |
| 6 | 1 | -1 | 853.30 | 12.41 |
| 6 | 1 | -1 | 750.32 | 12.04 |
| 6 | 1 | -1 | 851.07 | 11.22 |

## CIF 31

|   |   |     |        |       |
|---|---|-----|--------|-------|
| 6 | 1 | -1  | 977.80 | 12.95 |
| 6 | 1 | 0   | 4.49   | 1.37  |
| 6 | 1 | 0   | 2.81   | 0.87  |
| 6 | 1 | 0   | 3.87   | 0.93  |
| 6 | 1 | 0   | 2.71   | 0.77  |
| 6 | 1 | 0   | 5.79   | 1.15  |
| 6 | 1 | 1   | 13.74  | 1.96  |
| 6 | 1 | 1   | 10.85  | 1.30  |
| 6 | 1 | 1   | 10.29  | 1.24  |
| 6 | 1 | 1   | 11.70  | 1.21  |
| 6 | 1 | 1   | 15.41  | 1.67  |
| 6 | 1 | 2   | 13.91  | 1.41  |
| 6 | 1 | 2   | 13.14  | 1.25  |
| 6 | 1 | 3   | 337.87 | 8.53  |
| 6 | 1 | 3   | 331.46 | 6.64  |
| 6 | 1 | 3   | 344.87 | 7.82  |
| 6 | 1 | 4   | 167.66 | 4.47  |
| 6 | 1 | 5   | 81.68  | 3.41  |
| 6 | 2 | -15 | 46.32  | 2.44  |
| 6 | 2 | -14 | 258.90 | 6.12  |
| 6 | 2 | -14 | 258.15 | 6.39  |
| 6 | 2 | -13 | 23.24  | 2.21  |
| 6 | 2 | -13 | 22.22  | 2.27  |
| 6 | 2 | -13 | 18.97  | 2.02  |
| 6 | 2 | -13 | 20.85  | 2.11  |
| 6 | 2 | -12 | 412.50 | 9.92  |
| 6 | 2 | -12 | 461.05 | 10.00 |
| 6 | 2 | -12 | 430.22 | 10.40 |
| 6 | 2 | -12 | 434.46 | 8.70  |
| 6 | 2 | -12 | 395.60 | 9.22  |
| 6 | 2 | -12 | 431.34 | 9.95  |
| 6 | 2 | -11 | 105.56 | 4.29  |
| 6 | 2 | -11 | 94.87  | 4.11  |
| 6 | 2 | -11 | 109.78 | 5.08  |
| 6 | 2 | -11 | 112.46 | 5.54  |
| 6 | 2 | -11 | 104.72 | 4.43  |
| 6 | 2 | -11 | 100.20 | 4.57  |
| 6 | 2 | -11 | 97.78  | 4.69  |
| 6 | 2 | -10 | 235.78 | 6.47  |
| 6 | 2 | -10 | 197.10 | 6.22  |
| 6 | 2 | -10 | 199.53 | 6.43  |

## CIF 31

|   |   |     |         |       |
|---|---|-----|---------|-------|
| 6 | 2 | -10 | 197.80  | 6.79  |
| 6 | 2 | -10 | 214.43  | 7.67  |
| 6 | 2 | -10 | 200.97  | 6.43  |
| 6 | 2 | -10 | 196.79  | 6.28  |
| 6 | 2 | -10 | 191.72  | 6.12  |
| 6 | 2 | -10 | 172.09  | 6.37  |
| 6 | 2 | -10 | 192.32  | 5.85  |
| 6 | 2 | -9  | 950.87  | 15.47 |
| 6 | 2 | -9  | 1123.29 | 15.97 |
| 6 | 2 | -9  | 1012.10 | 15.93 |
| 6 | 2 | -9  | 1090.02 | 17.13 |
| 6 | 2 | -9  | 1114.79 | 16.74 |
| 6 | 2 | -9  | 1057.99 | 16.42 |
| 6 | 2 | -9  | 1117.83 | 16.72 |
| 6 | 2 | -9  | 1019.88 | 15.20 |
| 6 | 2 | -9  | 1039.28 | 14.94 |
| 6 | 2 | -9  | 1056.64 | 15.55 |
| 6 | 2 | -9  | 988.02  | 15.44 |
| 6 | 2 | -9  | 1062.02 | 15.81 |
| 6 | 2 | -8  | 682.91  | 11.75 |
| 6 | 2 | -8  | 686.43  | 12.40 |
| 6 | 2 | -8  | 756.84  | 12.97 |
| 6 | 2 | -8  | 613.94  | 12.00 |
| 6 | 2 | -8  | 712.62  | 12.26 |
| 6 | 2 | -8  | 685.38  | 12.71 |
| 6 | 2 | -8  | 649.61  | 11.57 |
| 6 | 2 | -8  | 682.24  | 10.93 |
| 6 | 2 | -8  | 709.46  | 11.85 |
| 6 | 2 | -8  | 608.30  | 11.12 |
| 6 | 2 | -8  | 714.60  | 12.85 |
| 6 | 2 | -8  | 679.39  | 12.09 |
| 6 | 2 | -7  | 529.20  | 9.79  |
| 6 | 2 | -7  | 580.36  | 11.43 |
| 6 | 2 | -7  | 563.55  | 10.59 |
| 6 | 2 | -7  | 489.07  | 8.71  |
| 6 | 2 | -7  | 519.98  | 10.15 |
| 6 | 2 | -7  | 575.03  | 11.50 |
| 6 | 2 | -7  | 604.36  | 11.49 |
| 6 | 2 | -7  | 554.72  | 10.68 |
| 6 | 2 | -7  | 574.15  | 10.12 |
| 6 | 2 | -7  | 513.16  | 9.37  |

## CIF 31

|   |   |    |        |       |
|---|---|----|--------|-------|
| 6 | 2 | -7 | 550.54 | 10.80 |
| 6 | 2 | -7 | 526.83 | 10.37 |
| 6 | 2 | -6 | 311.28 | 6.79  |
| 6 | 2 | -6 | 352.82 | 8.82  |
| 6 | 2 | -6 | 297.83 | 6.99  |
| 6 | 2 | -6 | 316.00 | 8.30  |
| 6 | 2 | -6 | 326.84 | 6.77  |
| 6 | 2 | -6 | 322.70 | 7.38  |
| 6 | 2 | -6 | 331.90 | 7.54  |
| 6 | 2 | -6 | 339.48 | 8.27  |
| 6 | 2 | -6 | 317.37 | 7.11  |
| 6 | 2 | -6 | 273.40 | 6.09  |
| 6 | 2 | -6 | 334.56 | 7.86  |
| 6 | 2 | -6 | 318.49 | 7.82  |
| 6 | 2 | -5 | 24.07  | 1.76  |
| 6 | 2 | -5 | 25.98  | 2.13  |
| 6 | 2 | -5 | 26.90  | 1.95  |
| 6 | 2 | -5 | 31.83  | 2.74  |
| 6 | 2 | -5 | 23.67  | 1.66  |
| 6 | 2 | -5 | 24.98  | 1.99  |
| 6 | 2 | -5 | 22.53  | 2.83  |
| 6 | 2 | -5 | 29.09  | 2.34  |
| 6 | 2 | -5 | 27.54  | 2.70  |
| 6 | 2 | -5 | 24.69  | 1.95  |
| 6 | 2 | -5 | 28.63  | 2.08  |
| 6 | 2 | -5 | 26.84  | 2.21  |
| 6 | 2 | -5 | 26.16  | 2.44  |
| 6 | 2 | -4 | 373.17 | 6.70  |
| 6 | 2 | -4 | 344.46 | 9.21  |
| 6 | 2 | -4 | 381.15 | 7.78  |
| 6 | 2 | -4 | 410.78 | 7.72  |
| 6 | 2 | -4 | 388.12 | 7.58  |
| 6 | 2 | -4 | 442.26 | 9.68  |
| 6 | 2 | -4 | 414.80 | 6.96  |
| 6 | 2 | -4 | 405.58 | 7.79  |
| 6 | 2 | -4 | 327.00 | 8.56  |
| 6 | 2 | -4 | 411.06 | 8.66  |
| 6 | 2 | -4 | 385.88 | 7.53  |
| 6 | 2 | -4 | 407.95 | 8.23  |
| 6 | 2 | -3 | 5.97   | 1.74  |
| 6 | 2 | -3 | 4.71   | 1.09  |

## CIF 31

|   |   |     |        |      |
|---|---|-----|--------|------|
| 6 | 2 | -3  | 9.28   | 1.56 |
| 6 | 2 | -3  | 5.87   | 1.08 |
| 6 | 2 | -3  | 3.85   | 0.75 |
| 6 | 2 | -3  | 4.86   | 1.21 |
| 6 | 2 | -3  | 3.94   | 1.36 |
| 6 | 2 | -3  | 5.39   | 1.25 |
| 6 | 2 | -3  | 7.35   | 1.22 |
| 6 | 2 | -3  | 4.39   | 1.10 |
| 6 | 2 | -3  | 7.75   | 1.50 |
| 6 | 2 | -3  | 5.38   | 1.04 |
| 6 | 2 | -2  | 61.22  | 2.96 |
| 6 | 2 | -2  | 67.47  | 3.14 |
| 6 | 2 | -2  | 64.89  | 3.25 |
| 6 | 2 | -2  | 67.01  | 3.00 |
| 6 | 2 | -2  | 66.22  | 2.91 |
| 6 | 2 | -2  | 63.54  | 3.47 |
| 6 | 2 | -2  | 63.82  | 2.96 |
| 6 | 2 | -1  | 252.00 | 5.92 |
| 6 | 2 | -1  | 227.63 | 6.02 |
| 6 | 2 | -1  | 213.06 | 5.35 |
| 6 | 2 | -1  | 246.91 | 5.58 |
| 6 | 2 | -1  | 224.88 | 6.42 |
| 6 | 2 | -1  | 245.45 | 5.99 |
| 6 | 2 | 0   | 76.06  | 3.24 |
| 6 | 2 | 0   | 61.92  | 3.00 |
| 6 | 2 | 0   | 71.30  | 2.95 |
| 6 | 2 | 0   | 69.51  | 3.52 |
| 6 | 2 | 0   | 72.87  | 3.34 |
| 6 | 2 | 1   | 253.15 | 5.95 |
| 6 | 2 | 1   | 235.37 | 5.48 |
| 6 | 2 | 1   | 248.39 | 6.37 |
| 6 | 2 | 2   | 256.47 | 6.02 |
| 6 | 2 | 2   | 263.52 | 5.77 |
| 6 | 2 | 2   | 264.47 | 6.77 |
| 6 | 2 | 3   | 109.89 | 3.83 |
| 6 | 2 | 4   | 202.20 | 5.14 |
| 6 | 3 | -15 | 5.85   | 1.01 |
| 6 | 3 | -15 | 4.47   | 0.71 |
| 6 | 3 | -14 | 0.95   | 1.00 |
| 6 | 3 | -14 | 1.12   | 0.90 |
| 6 | 3 | -13 | -0.33  | 1.16 |



## CIF 31

|   |   |     |        |      |
|---|---|-----|--------|------|
| 6 | 3 | -13 | 0.96   | 1.10 |
| 6 | 3 | -13 | 0.17   | 1.05 |
| 6 | 3 | -13 | 0.58   | 0.83 |
| 6 | 3 | -13 | 0.05   | 0.95 |
| 6 | 3 | -12 | 109.77 | 4.30 |
| 6 | 3 | -12 | 106.40 | 4.82 |
| 6 | 3 | -12 | 118.60 | 5.00 |
| 6 | 3 | -12 | 110.92 | 5.24 |
| 6 | 3 | -12 | 113.45 | 4.43 |
| 6 | 3 | -12 | 98.74  | 4.09 |
| 6 | 3 | -12 | 108.81 | 4.86 |
| 6 | 3 | -11 | 3.37   | 1.17 |
| 6 | 3 | -11 | 3.88   | 1.22 |
| 6 | 3 | -11 | 5.66   | 1.66 |
| 6 | 3 | -11 | 3.85   | 1.14 |
| 6 | 3 | -11 | 4.70   | 1.79 |
| 6 | 3 | -11 | 4.31   | 1.37 |
| 6 | 3 | -11 | 5.03   | 1.22 |
| 6 | 3 | -11 | 4.08   | 1.10 |
| 6 | 3 | -10 | 26.57  | 2.30 |
| 6 | 3 | -10 | 22.83  | 2.32 |
| 6 | 3 | -10 | 29.14  | 2.68 |
| 6 | 3 | -10 | 24.33  | 2.95 |
| 6 | 3 | -10 | 23.98  | 2.49 |
| 6 | 3 | -10 | 22.78  | 2.00 |
| 6 | 3 | -10 | 27.19  | 2.33 |
| 6 | 3 | -10 | 29.76  | 2.77 |
| 6 | 3 | -10 | 22.72  | 2.22 |
| 6 | 3 | -9  | 53.07  | 3.16 |
| 6 | 3 | -9  | 44.46  | 3.12 |
| 6 | 3 | -9  | 45.25  | 3.19 |
| 6 | 3 | -9  | 42.36  | 3.73 |
| 6 | 3 | -9  | 49.04  | 3.16 |
| 6 | 3 | -9  | 49.73  | 3.43 |
| 6 | 3 | -9  | 50.10  | 3.04 |
| 6 | 3 | -9  | 51.56  | 3.12 |
| 6 | 3 | -9  | 46.10  | 3.23 |
| 6 | 3 | -9  | 44.85  | 3.06 |
| 6 | 3 | -8  | 279.74 | 6.76 |
| 6 | 3 | -8  | 288.44 | 7.15 |
| 6 | 3 | -8  | 265.84 | 7.55 |

## CIF 31

|   |   |    |        |       |
|---|---|----|--------|-------|
| 6 | 3 | -8 | 259.97 | 7.19  |
| 6 | 3 | -8 | 239.37 | 8.28  |
| 6 | 3 | -8 | 260.97 | 7.10  |
| 6 | 3 | -8 | 291.90 | 8.07  |
| 6 | 3 | -8 | 241.18 | 6.97  |
| 6 | 3 | -8 | 282.19 | 6.95  |
| 6 | 3 | -8 | 269.15 | 6.99  |
| 6 | 3 | -8 | 272.11 | 7.63  |
| 6 | 3 | -8 | 280.83 | 7.65  |
| 6 | 3 | -7 | 177.83 | 5.15  |
| 6 | 3 | -7 | 205.32 | 6.59  |
| 6 | 3 | -7 | 163.07 | 5.49  |
| 6 | 3 | -7 | 223.88 | 6.69  |
| 6 | 3 | -7 | 213.86 | 6.17  |
| 6 | 3 | -7 | 222.21 | 7.64  |
| 6 | 3 | -7 | 189.41 | 5.76  |
| 6 | 3 | -7 | 204.06 | 6.89  |
| 6 | 3 | -7 | 188.00 | 6.32  |
| 6 | 3 | -7 | 199.16 | 6.05  |
| 6 | 3 | -7 | 203.12 | 5.94  |
| 6 | 3 | -7 | 192.72 | 6.17  |
| 6 | 3 | -7 | 198.15 | 6.42  |
| 6 | 3 | -6 | 454.94 | 9.97  |
| 6 | 3 | -6 | 460.03 | 8.98  |
| 6 | 3 | -6 | 452.29 | 8.27  |
| 6 | 3 | -6 | 499.75 | 11.52 |
| 6 | 3 | -6 | 432.75 | 8.22  |
| 6 | 3 | -6 | 453.79 | 8.96  |
| 6 | 3 | -6 | 516.16 | 10.71 |
| 6 | 3 | -6 | 467.11 | 10.41 |
| 6 | 3 | -6 | 491.46 | 9.39  |
| 6 | 3 | -6 | 444.12 | 9.44  |
| 6 | 3 | -6 | 453.54 | 9.95  |
| 6 | 3 | -5 | 226.75 | 7.24  |
| 6 | 3 | -5 | 203.21 | 6.33  |
| 6 | 3 | -5 | 190.94 | 5.25  |
| 6 | 3 | -5 | 207.05 | 7.03  |
| 6 | 3 | -5 | 178.73 | 4.93  |
| 6 | 3 | -5 | 199.16 | 5.41  |
| 6 | 3 | -5 | 222.09 | 6.88  |
| 6 | 3 | -5 | 202.36 | 6.89  |

## CIF 31

|   |   |    |        |      |
|---|---|----|--------|------|
| 6 | 3 | -5 | 177.77 | 5.43 |
| 6 | 3 | -5 | 194.01 | 5.76 |
| 6 | 3 | -4 | 423.43 | 9.87 |
| 6 | 3 | -4 | 410.69 | 8.38 |
| 6 | 3 | -4 | 364.74 | 8.60 |
| 6 | 3 | -4 | 429.13 | 8.23 |
| 6 | 3 | -4 | 361.25 | 9.34 |
| 6 | 3 | -4 | 367.39 | 7.37 |
| 6 | 3 | -4 | 384.33 | 7.24 |
| 6 | 3 | -4 | 459.15 | 9.79 |
| 6 | 3 | -4 | 393.46 | 9.51 |
| 6 | 3 | -4 | 430.47 | 8.42 |
| 6 | 3 | -4 | 404.48 | 8.19 |
| 6 | 3 | -4 | 392.35 | 9.12 |
| 6 | 3 | -3 | 348.44 | 8.73 |
| 6 | 3 | -3 | 378.42 | 7.93 |
| 6 | 3 | -3 | 388.95 | 7.78 |
| 6 | 3 | -3 | 311.81 | 8.27 |
| 6 | 3 | -3 | 322.03 | 6.50 |
| 6 | 3 | -3 | 418.12 | 9.37 |
| 6 | 3 | -3 | 372.32 | 7.97 |
| 6 | 3 | -3 | 367.68 | 7.44 |
| 6 | 3 | -3 | 356.10 | 7.57 |
| 6 | 3 | -3 | 345.73 | 8.51 |
| 6 | 3 | -3 | 355.10 | 7.23 |
| 6 | 3 | -2 | 1.21   | 1.24 |
| 6 | 3 | -2 | 0.87   | 0.90 |
| 6 | 3 | -2 | 1.61   | 0.75 |
| 6 | 3 | -2 | 0.70   | 0.89 |
| 6 | 3 | -2 | 0.85   | 1.07 |
| 6 | 3 | -2 | 0.97   | 0.75 |
| 6 | 3 | -2 | 0.56   | 0.90 |
| 6 | 3 | -2 | 0.11   | 1.07 |
| 6 | 3 | -2 | 1.88   | 0.87 |
| 6 | 3 | -1 | 111.66 | 5.04 |
| 6 | 3 | -1 | 136.11 | 4.65 |
| 6 | 3 | -1 | 119.71 | 4.79 |
| 6 | 3 | -1 | 142.50 | 4.47 |
| 6 | 3 | -1 | 131.80 | 4.96 |
| 6 | 3 | -1 | 127.63 | 4.43 |
| 6 | 3 | 0  | 6.12   | 1.37 |

## CIF 31

|   |   |     |         |       |
|---|---|-----|---------|-------|
| 6 | 3 | 0   | 10.63   | 1.52  |
| 6 | 3 | 0   | 6.14    | 1.30  |
| 6 | 3 | 0   | 8.49    | 1.29  |
| 6 | 3 | 0   | 8.62    | 1.43  |
| 6 | 3 | 0   | 7.10    | 1.32  |
| 6 | 3 | 1   | 2015.84 | 22.39 |
| 6 | 3 | 1   | 1668.40 | 23.03 |
| 6 | 3 | 1   | 1947.88 | 21.68 |
| 6 | 3 | 1   | 1778.45 | 22.08 |
| 6 | 3 | 2   | 80.64   | 3.49  |
| 6 | 3 | 2   | 76.95   | 3.76  |
| 6 | 3 | 2   | 82.97   | 3.39  |
| 6 | 3 | 3   | 32.42   | 2.23  |
| 6 | 3 | 4   | 33.42   | 2.10  |
| 6 | 3 | 5   | 193.23  | 5.44  |
| 6 | 4 | -14 | 122.06  | 3.99  |
| 6 | 4 | -14 | 140.41  | 4.22  |
| 6 | 4 | -13 | 200.15  | 5.91  |
| 6 | 4 | -13 | 197.49  | 5.17  |
| 6 | 4 | -12 | 201.84  | 5.88  |
| 6 | 4 | -12 | 186.42  | 6.01  |
| 6 | 4 | -12 | 202.48  | 6.47  |
| 6 | 4 | -12 | 197.78  | 5.30  |
| 6 | 4 | -12 | 177.56  | 6.45  |
| 6 | 4 | -12 | 214.74  | 6.10  |
| 6 | 4 | -12 | 197.78  | 6.28  |
| 6 | 4 | -11 | 300.34  | 7.08  |
| 6 | 4 | -11 | 309.34  | 7.81  |
| 6 | 4 | -11 | 309.73  | 7.92  |
| 6 | 4 | -11 | 304.88  | 8.50  |
| 6 | 4 | -11 | 294.87  | 8.95  |
| 6 | 4 | -11 | 323.93  | 8.09  |
| 6 | 4 | -11 | 312.88  | 8.34  |
| 6 | 4 | -11 | 302.53  | 7.53  |
| 6 | 4 | -10 | 156.21  | 5.17  |
| 6 | 4 | -10 | 148.34  | 5.57  |
| 6 | 4 | -10 | 120.76  | 4.96  |
| 6 | 4 | -10 | 120.67  | 6.04  |
| 6 | 4 | -10 | 131.55  | 5.47  |
| 6 | 4 | -10 | 139.22  | 4.86  |
| 6 | 4 | -10 | 155.57  | 5.24  |

## CIF 31

|   |   |     |        |      |
|---|---|-----|--------|------|
| 6 | 4 | -10 | 136.87 | 5.58 |
| 6 | 4 | -10 | 138.57 | 5.23 |
| 6 | 4 | -9  | 63.18  | 3.11 |
| 6 | 4 | -9  | 62.90  | 3.36 |
| 6 | 4 | -9  | 73.60  | 3.99 |
| 6 | 4 | -9  | 68.48  | 3.86 |
| 6 | 4 | -9  | 56.97  | 3.36 |
| 6 | 4 | -9  | 64.69  | 3.25 |
| 6 | 4 | -9  | 66.72  | 3.92 |
| 6 | 4 | -9  | 61.76  | 3.50 |
| 6 | 4 | -9  | 63.95  | 3.20 |
| 6 | 4 | -9  | 59.74  | 3.36 |
| 6 | 4 | -9  | 55.04  | 3.55 |
| 6 | 4 | -9  | 59.87  | 3.58 |
| 6 | 4 | -8  | 207.36 | 6.03 |
| 6 | 4 | -8  | 217.82 | 6.22 |
| 6 | 4 | -8  | 197.94 | 6.59 |
| 6 | 4 | -8  | 209.55 | 6.60 |
| 6 | 4 | -8  | 185.78 | 5.83 |
| 6 | 4 | -8  | 201.88 | 7.73 |
| 6 | 4 | -8  | 212.69 | 6.23 |
| 6 | 4 | -8  | 218.93 | 7.16 |
| 6 | 4 | -8  | 212.54 | 6.74 |
| 6 | 4 | -8  | 219.76 | 6.34 |
| 6 | 4 | -8  | 218.57 | 6.37 |
| 6 | 4 | -8  | 200.41 | 6.44 |
| 6 | 4 | -8  | 190.97 | 6.50 |
| 6 | 4 | -7  | 259.55 | 6.49 |
| 6 | 4 | -7  | 237.75 | 8.22 |
| 6 | 4 | -7  | 261.44 | 7.28 |
| 6 | 4 | -7  | 241.65 | 7.43 |
| 6 | 4 | -7  | 257.48 | 7.20 |
| 6 | 4 | -7  | 259.30 | 7.02 |
| 6 | 4 | -7  | 245.83 | 6.93 |
| 6 | 4 | -7  | 242.61 | 7.38 |
| 6 | 4 | -6  | 1.94   | 1.18 |
| 6 | 4 | -6  | 1.09   | 0.81 |
| 6 | 4 | -6  | 2.04   | 1.18 |
| 6 | 4 | -6  | 2.26   | 1.29 |
| 6 | 4 | -6  | 0.93   | 1.35 |
| 6 | 4 | -6  | 0.62   | 0.79 |

## CIF 31

|   |   |    |        |      |
|---|---|----|--------|------|
| 6 | 4 | -6 | 0.38   | 1.90 |
| 6 | 4 | -6 | 1.19   | 1.23 |
| 6 | 4 | -6 | 0.76   | 1.36 |
| 6 | 4 | -6 | 2.76   | 1.07 |
| 6 | 4 | -6 | 2.06   | 1.11 |
| 6 | 4 | -5 | 46.71  | 3.21 |
| 6 | 4 | -5 | 46.74  | 3.07 |
| 6 | 4 | -5 | 41.87  | 2.47 |
| 6 | 4 | -5 | 41.20  | 3.35 |
| 6 | 4 | -5 | 45.85  | 2.61 |
| 6 | 4 | -5 | 45.13  | 4.04 |
| 6 | 4 | -5 | 52.14  | 3.29 |
| 6 | 4 | -5 | 42.59  | 3.42 |
| 6 | 4 | -5 | 48.52  | 3.66 |
| 6 | 4 | -5 | 40.85  | 2.73 |
| 6 | 4 | -5 | 47.70  | 2.81 |
| 6 | 4 | -5 | 42.87  | 3.07 |
| 6 | 4 | -4 | 128.78 | 5.22 |
| 6 | 4 | -4 | 142.48 | 5.03 |
| 6 | 4 | -4 | 145.59 | 4.65 |
| 6 | 4 | -4 | 136.43 | 4.37 |
| 6 | 4 | -4 | 136.14 | 6.34 |
| 6 | 4 | -4 | 149.08 | 4.96 |
| 6 | 4 | -4 | 139.09 | 5.38 |
| 6 | 4 | -3 | 16.59  | 2.05 |
| 6 | 4 | -3 | 13.74  | 1.78 |
| 6 | 4 | -3 | 15.79  | 1.89 |
| 6 | 4 | -3 | 14.48  | 1.68 |
| 6 | 4 | -3 | 10.04  | 1.33 |
| 6 | 4 | -3 | 16.66  | 1.94 |
| 6 | 4 | -3 | 17.62  | 2.59 |
| 6 | 4 | -3 | 13.43  | 1.68 |
| 6 | 4 | -3 | 15.65  | 2.01 |
| 6 | 4 | -2 | 1.12   | 1.09 |
| 6 | 4 | -2 | 1.42   | 1.00 |
| 6 | 4 | -2 | 1.61   | 1.02 |
| 6 | 4 | -2 | 3.99   | 1.20 |
| 6 | 4 | -2 | -0.38  | 1.04 |
| 6 | 4 | -2 | 1.94   | 1.58 |
| 6 | 4 | -2 | 0.09   | 0.94 |
| 6 | 4 | -2 | 1.86   | 1.15 |

## CIF 31

|   |   |     |        |      |
|---|---|-----|--------|------|
| 6 | 4 | -1  | 215.99 | 6.17 |
| 6 | 4 | -1  | 209.77 | 5.95 |
| 6 | 4 | -1  | 219.91 | 5.91 |
| 6 | 4 | -1  | 218.13 | 6.97 |
| 6 | 4 | -1  | 215.45 | 5.87 |
| 6 | 4 | -1  | 210.35 | 6.20 |
| 6 | 4 | 0   | 274.64 | 6.74 |
| 6 | 4 | 0   | 260.08 | 7.35 |
| 6 | 4 | 1   | 219.63 | 5.95 |
| 6 | 4 | 1   | 216.91 | 6.38 |
| 6 | 4 | 1   | 229.47 | 5.83 |
| 6 | 4 | 2   | 203.82 | 5.52 |
| 6 | 4 | 2   | 185.68 | 5.67 |
| 6 | 4 | 2   | 197.31 | 5.21 |
| 6 | 4 | 3   | 135.21 | 4.23 |
| 6 | 4 | 4   | 257.47 | 6.55 |
| 6 | 5 | -14 | 4.40   | 0.95 |
| 6 | 5 | -13 | 463.13 | 8.61 |
| 6 | 5 | -13 | 445.68 | 7.81 |
| 6 | 5 | -12 | 52.14  | 2.77 |
| 6 | 5 | -12 | 57.20  | 3.06 |
| 6 | 5 | -12 | 50.08  | 2.89 |
| 6 | 5 | -12 | 54.57  | 2.75 |
| 6 | 5 | -11 | 162.88 | 5.39 |
| 6 | 5 | -11 | 146.64 | 4.84 |
| 6 | 5 | -11 | 162.33 | 5.71 |
| 6 | 5 | -11 | 155.85 | 5.17 |
| 6 | 5 | -11 | 169.47 | 5.62 |
| 6 | 5 | -11 | 163.19 | 5.51 |
| 6 | 5 | -11 | 166.68 | 5.38 |
| 6 | 5 | -10 | 33.44  | 2.36 |
| 6 | 5 | -10 | 29.98  | 2.55 |
| 6 | 5 | -10 | 20.35  | 1.86 |
| 6 | 5 | -10 | 33.00  | 2.18 |
| 6 | 5 | -10 | 27.60  | 2.61 |
| 6 | 5 | -10 | 27.40  | 2.28 |
| 6 | 5 | -10 | 28.00  | 2.26 |
| 6 | 5 | -10 | 24.48  | 2.28 |
| 6 | 5 | -10 | 27.43  | 2.42 |
| 6 | 5 | -9  | 165.18 | 5.06 |
| 6 | 5 | -9  | 175.85 | 5.43 |

## CIF 31

|   |   |    |        |      |
|---|---|----|--------|------|
| 6 | 5 | -9 | 126.90 | 6.13 |
| 6 | 5 | -9 | 163.87 | 5.22 |
| 6 | 5 | -9 | 146.74 | 5.79 |
| 6 | 5 | -9 | 156.20 | 5.53 |
| 6 | 5 | -9 | 160.94 | 5.14 |
| 6 | 5 | -9 | 175.80 | 5.54 |
| 6 | 5 | -9 | 154.69 | 5.50 |
| 6 | 5 | -9 | 157.78 | 5.77 |
| 6 | 5 | -8 | 4.49   | 1.31 |
| 6 | 5 | -8 | 3.70   | 1.24 |
| 6 | 5 | -8 | 3.15   | 1.20 |
| 6 | 5 | -8 | 3.62   | 1.80 |
| 6 | 5 | -8 | 2.86   | 1.02 |
| 6 | 5 | -8 | 3.17   | 1.31 |
| 6 | 5 | -8 | 2.71   | 1.22 |
| 6 | 5 | -8 | 2.79   | 1.33 |
| 6 | 5 | -8 | 4.23   | 1.22 |
| 6 | 5 | -8 | 4.65   | 1.27 |
| 6 | 5 | -8 | 3.58   | 1.45 |
| 6 | 5 | -7 | 1.00   | 1.29 |
| 6 | 5 | -7 | 0.76   | 0.86 |
| 6 | 5 | -7 | 1.46   | 1.14 |
| 6 | 5 | -7 | 1.28   | 1.08 |
| 6 | 5 | -7 | 2.21   | 1.14 |
| 6 | 5 | -7 | 0.40   | 1.17 |
| 6 | 5 | -7 | 0.95   | 1.39 |
| 6 | 5 | -7 | 0.69   | 1.08 |
| 6 | 5 | -7 | 2.20   | 1.39 |
| 6 | 5 | -7 | 0.80   | 1.10 |
| 6 | 5 | -7 | 0.97   | 0.91 |
| 6 | 5 | -7 | 1.29   | 1.10 |
| 6 | 5 | -6 | 1.19   | 1.08 |
| 6 | 5 | -6 | 0.50   | 1.01 |
| 6 | 5 | -6 | 1.07   | 1.20 |
| 6 | 5 | -6 | -0.31  | 0.87 |
| 6 | 5 | -6 | 0.80   | 1.21 |
| 6 | 5 | -6 | 1.10   | 1.28 |
| 6 | 5 | -6 | 0.05   | 1.04 |
| 6 | 5 | -6 | -0.05  | 0.96 |
| 6 | 5 | -6 | 1.99   | 1.29 |
| 6 | 5 | -5 | 241.82 | 6.95 |



## CIF 31

|   |   |    |        |       |
|---|---|----|--------|-------|
| 6 | 5 | -5 | 223.89 | 6.27  |
| 6 | 5 | -5 | 219.93 | 5.90  |
| 6 | 5 | -5 | 229.84 | 7.11  |
| 6 | 5 | -5 | 228.27 | 6.27  |
| 6 | 5 | -5 | 238.59 | 7.47  |
| 6 | 5 | -5 | 216.62 | 6.29  |
| 6 | 5 | -5 | 228.21 | 7.06  |
| 6 | 5 | -4 | 1.31   | 0.91  |
| 6 | 5 | -4 | 1.04   | 0.81  |
| 6 | 5 | -4 | 2.40   | 1.06  |
| 6 | 5 | -4 | 1.31   | 0.83  |
| 6 | 5 | -4 | 2.64   | 1.54  |
| 6 | 5 | -4 | 2.14   | 1.29  |
| 6 | 5 | -4 | 1.22   | 1.43  |
| 6 | 5 | -4 | 2.53   | 1.48  |
| 6 | 5 | -4 | 1.43   | 1.02  |
| 6 | 5 | -4 | 2.53   | 1.27  |
| 6 | 5 | -3 | 55.34  | 3.13  |
| 6 | 5 | -3 | 65.15  | 3.15  |
| 6 | 5 | -3 | 54.93  | 3.42  |
| 6 | 5 | -3 | 55.68  | 3.68  |
| 6 | 5 | -3 | 67.20  | 3.37  |
| 6 | 5 | -3 | 52.63  | 3.27  |
| 6 | 5 | -2 | 17.84  | 1.98  |
| 6 | 5 | -2 | 20.74  | 1.91  |
| 6 | 5 | -2 | 20.03  | 2.17  |
| 6 | 5 | -2 | 19.82  | 2.34  |
| 6 | 5 | -2 | 18.89  | 2.30  |
| 6 | 5 | -2 | 19.06  | 1.92  |
| 6 | 5 | -2 | 17.03  | 1.91  |
| 6 | 5 | -1 | 546.30 | 9.96  |
| 6 | 5 | -1 | 483.51 | 9.30  |
| 6 | 5 | -1 | 559.69 | 11.25 |
| 6 | 5 | -1 | 526.22 | 10.64 |
| 6 | 5 | -1 | 541.71 | 9.91  |
| 6 | 5 | -1 | 472.09 | 9.34  |
| 6 | 5 | 0  | 2.00   | 1.01  |
| 6 | 5 | 0  | 1.65   | 1.16  |
| 6 | 5 | 0  | 2.71   | 1.06  |
| 6 | 5 | 0  | 2.19   | 0.91  |
| 6 | 5 | 1  | 0.29   | 0.83  |

## CIF 31

|   |   |     |        |      |
|---|---|-----|--------|------|
| 6 | 5 | 1   | 0.05   | 0.88 |
| 6 | 5 | 2   | 316.90 | 6.40 |
| 6 | 5 | 2   | 309.78 | 7.80 |
| 6 | 5 | 3   | 1.61   | 0.81 |
| 6 | 5 | 3   | 2.78   | 0.82 |
| 6 | 5 | 3   | 2.45   | 0.99 |
| 6 | 6 | -13 | 11.41  | 1.31 |
| 6 | 6 | -13 | 11.34  | 1.19 |
| 6 | 6 | -12 | 0.86   | 0.89 |
| 6 | 6 | -12 | 1.25   | 0.76 |
| 6 | 6 | -12 | 1.74   | 0.98 |
| 6 | 6 | -11 | 298.54 | 7.01 |
| 6 | 6 | -11 | 226.17 | 6.04 |
| 6 | 6 | -11 | 303.09 | 7.05 |
| 6 | 6 | -11 | 260.36 | 5.89 |
| 6 | 6 | -11 | 265.61 | 6.50 |
| 6 | 6 | -10 | 469.97 | 8.36 |
| 6 | 6 | -10 | 446.42 | 8.86 |
| 6 | 6 | -10 | 458.51 | 9.34 |
| 6 | 6 | -9  | 120.67 | 4.18 |
| 6 | 6 | -9  | 124.94 | 4.25 |
| 6 | 6 | -9  | 109.41 | 4.51 |
| 6 | 6 | -9  | 114.55 | 4.61 |
| 6 | 6 | -9  | 115.56 | 4.17 |
| 6 | 6 | -9  | 105.15 | 4.35 |
| 6 | 6 | -9  | 120.89 | 4.32 |
| 6 | 6 | -9  | 124.78 | 4.90 |
| 6 | 6 | -8  | 56.07  | 3.18 |
| 6 | 6 | -8  | 60.16  | 3.06 |
| 6 | 6 | -8  | 55.63  | 3.26 |
| 6 | 6 | -8  | 60.43  | 2.95 |
| 6 | 6 | -8  | 60.51  | 3.26 |
| 6 | 6 | -8  | 61.38  | 3.57 |
| 6 | 6 | -8  | 56.47  | 3.33 |
| 6 | 6 | -8  | 60.15  | 3.27 |
| 6 | 6 | -8  | 55.75  | 3.06 |
| 6 | 6 | -7  | 19.34  | 2.16 |
| 6 | 6 | -7  | 18.78  | 1.88 |
| 6 | 6 | -7  | 17.07  | 1.96 |
| 6 | 6 | -7  | 17.12  | 1.86 |
| 6 | 6 | -7  | 17.59  | 1.94 |

## CIF 31

|   |   |    |        |       |
|---|---|----|--------|-------|
| 6 | 6 | -7 | 19.98  | 2.18  |
| 6 | 6 | -7 | 20.81  | 2.19  |
| 6 | 6 | -7 | 18.50  | 2.19  |
| 6 | 6 | -7 | 18.31  | 2.08  |
| 6 | 6 | -7 | 18.26  | 1.88  |
| 6 | 6 | -7 | 17.15  | 2.07  |
| 6 | 6 | -6 | 94.49  | 4.34  |
| 6 | 6 | -6 | 93.89  | 3.93  |
| 6 | 6 | -6 | 81.43  | 3.91  |
| 6 | 6 | -6 | 102.63 | 4.42  |
| 6 | 6 | -6 | 96.87  | 4.39  |
| 6 | 6 | -6 | 87.52  | 4.15  |
| 6 | 6 | -6 | 98.92  | 4.45  |
| 6 | 6 | -6 | 102.36 | 4.17  |
| 6 | 6 | -6 | 89.91  | 4.26  |
| 6 | 6 | -5 | 87.80  | 4.33  |
| 6 | 6 | -5 | 76.57  | 3.63  |
| 6 | 6 | -5 | 82.65  | 3.73  |
| 6 | 6 | -5 | 87.49  | 4.19  |
| 6 | 6 | -5 | 85.54  | 4.20  |
| 6 | 6 | -5 | 76.27  | 3.84  |
| 6 | 6 | -5 | 78.83  | 4.11  |
| 6 | 6 | -5 | 89.13  | 4.39  |
| 6 | 6 | -5 | 86.58  | 3.82  |
| 6 | 6 | -5 | 74.91  | 3.86  |
| 6 | 6 | -5 | 74.40  | 3.71  |
| 6 | 6 | -4 | 635.89 | 11.95 |
| 6 | 6 | -4 | 506.36 | 9.75  |
| 6 | 6 | -4 | 617.58 | 10.64 |
| 6 | 6 | -4 | 552.27 | 10.51 |
| 6 | 6 | -4 | 577.85 | 11.47 |
| 6 | 6 | -4 | 629.61 | 10.87 |
| 6 | 6 | -4 | 531.61 | 10.58 |
| 6 | 6 | -4 | 566.89 | 11.12 |
| 6 | 6 | -3 | 348.98 | 7.82  |
| 6 | 6 | -3 | 360.98 | 8.65  |
| 6 | 6 | -3 | 331.86 | 7.43  |
| 6 | 6 | -3 | 358.50 | 8.52  |
| 6 | 6 | -3 | 377.87 | 8.97  |
| 6 | 6 | -3 | 364.53 | 7.87  |
| 6 | 6 | -3 | 324.26 | 7.69  |

## CIF 31

|   |   |     |        |      |
|---|---|-----|--------|------|
| 6 | 6 | -3  | 325.55 | 8.41 |
| 6 | 6 | -2  | 305.13 | 7.59 |
| 6 | 6 | -2  | 278.68 | 7.24 |
| 6 | 6 | -2  | 305.23 | 7.79 |
| 6 | 6 | -2  | 304.04 | 7.03 |
| 6 | 6 | -2  | 269.12 | 7.68 |
| 6 | 6 | -1  | 239.17 | 6.04 |
| 6 | 6 | -1  | 243.44 | 6.47 |
| 6 | 6 | -1  | 226.45 | 6.04 |
| 6 | 6 | -1  | 254.04 | 6.74 |
| 6 | 6 | -1  | 241.41 | 7.01 |
| 6 | 6 | 0   | 170.60 | 5.29 |
| 6 | 6 | 0   | 173.74 | 5.45 |
| 6 | 6 | 0   | 173.66 | 4.98 |
| 6 | 6 | 0   | 183.79 | 5.24 |
| 6 | 6 | 1   | 247.13 | 5.65 |
| 6 | 6 | 1   | 257.61 | 6.11 |
| 6 | 6 | 1   | 238.27 | 5.10 |
| 6 | 6 | 1   | 241.90 | 6.46 |
| 6 | 6 | 2   | 22.13  | 1.55 |
| 6 | 6 | 3   | 63.91  | 2.26 |
| 6 | 7 | -12 | 0.82   | 0.57 |
| 6 | 7 | -12 | 0.91   | 0.52 |
| 6 | 7 | -12 | 0.73   | 0.65 |
| 6 | 7 | -11 | 1.11   | 0.75 |
| 6 | 7 | -11 | 1.47   | 0.84 |
| 6 | 7 | -10 | 36.70  | 2.13 |
| 6 | 7 | -10 | 41.29  | 2.49 |
| 6 | 7 | -10 | 38.61  | 2.24 |
| 6 | 7 | -10 | 37.32  | 2.31 |
| 6 | 7 | -9  | 2.67   | 0.93 |
| 6 | 7 | -9  | 1.16   | 0.81 |
| 6 | 7 | -9  | 2.50   | 1.05 |
| 6 | 7 | -9  | 2.34   | 1.12 |
| 6 | 7 | -9  | 2.06   | 0.97 |
| 6 | 7 | -8  | 50.02  | 2.69 |
| 6 | 7 | -8  | 43.40  | 2.33 |
| 6 | 7 | -8  | 52.06  | 2.80 |
| 6 | 7 | -8  | 49.74  | 2.87 |
| 6 | 7 | -8  | 44.96  | 2.76 |
| 6 | 7 | -8  | 48.28  | 2.85 |

## CIF 31

|   |   |    |        |      |
|---|---|----|--------|------|
| 6 | 7 | -7 | 0.70   | 1.08 |
| 6 | 7 | -7 | -1.07  | 0.93 |
| 6 | 7 | -7 | -0.08  | 0.83 |
| 6 | 7 | -7 | 0.13   | 1.03 |
| 6 | 7 | -7 | 0.57   | 1.00 |
| 6 | 7 | -7 | 1.83   | 1.01 |
| 6 | 7 | -7 | 0.20   | 1.03 |
| 6 | 7 | -7 | 0.63   | 0.87 |
| 6 | 7 | -6 | 142.68 | 4.91 |
| 6 | 7 | -6 | 126.76 | 4.44 |
| 6 | 7 | -6 | 126.68 | 4.50 |
| 6 | 7 | -6 | 137.79 | 4.86 |
| 6 | 7 | -6 | 123.94 | 4.30 |
| 6 | 7 | -6 | 118.85 | 4.61 |
| 6 | 7 | -6 | 136.42 | 4.87 |
| 6 | 7 | -6 | 122.83 | 4.50 |
| 6 | 7 | -5 | 18.13  | 2.00 |
| 6 | 7 | -5 | 15.42  | 1.89 |
| 6 | 7 | -5 | 19.61  | 1.98 |
| 6 | 7 | -5 | 17.02  | 1.66 |
| 6 | 7 | -5 | 17.14  | 1.87 |
| 6 | 7 | -5 | 18.85  | 2.07 |
| 6 | 7 | -5 | 14.43  | 1.62 |
| 6 | 7 | -4 | 161.52 | 5.35 |
| 6 | 7 | -4 | 173.50 | 5.47 |
| 6 | 7 | -4 | 176.34 | 5.38 |
| 6 | 7 | -4 | 146.24 | 4.12 |
| 6 | 7 | -4 | 154.43 | 4.99 |
| 6 | 7 | -4 | 146.85 | 4.57 |
| 6 | 7 | -4 | 153.00 | 4.92 |
| 6 | 7 | -3 | 90.27  | 3.83 |
| 6 | 7 | -3 | 87.39  | 3.87 |
| 6 | 7 | -3 | 80.64  | 3.59 |
| 6 | 7 | -3 | 74.98  | 3.28 |
| 6 | 7 | -3 | 84.96  | 3.75 |
| 6 | 7 | -3 | 74.50  | 3.51 |
| 6 | 7 | -2 | 39.63  | 2.53 |
| 6 | 7 | -2 | 37.45  | 2.51 |
| 6 | 7 | -2 | 33.14  | 2.50 |
| 6 | 7 | -2 | 40.05  | 2.38 |
| 6 | 7 | -2 | 30.30  | 1.97 |

## CIF 31

|   |   |     |        |      |
|---|---|-----|--------|------|
| 6 | 7 | -2  | 40.10  | 2.47 |
| 6 | 7 | -2  | 39.44  | 2.56 |
| 6 | 7 | -1  | 9.04   | 1.29 |
| 6 | 7 | -1  | 6.27   | 1.14 |
| 6 | 7 | -1  | 7.09   | 1.24 |
| 6 | 7 | -1  | 8.69   | 1.15 |
| 6 | 7 | -1  | 7.78   | 1.15 |
| 6 | 7 | -1  | 7.16   | 1.31 |
| 6 | 7 | 0   | 105.62 | 3.11 |
| 6 | 7 | 0   | 100.74 | 3.64 |
| 6 | 7 | 0   | 104.31 | 3.41 |
| 6 | 7 | 1   | 25.62  | 1.68 |
| 6 | 8 | -10 | 18.52  | 1.36 |
| 6 | 8 | -10 | 21.19  | 1.36 |
| 6 | 8 | -9  | 8.91   | 1.02 |
| 6 | 8 | -9  | 8.66   | 1.04 |
| 6 | 8 | -8  | 0.77   | 0.75 |
| 6 | 8 | -8  | 1.29   | 0.84 |
| 6 | 8 | -8  | 0.60   | 0.70 |
| 6 | 8 | -7  | 25.56  | 1.79 |
| 6 | 8 | -7  | 25.59  | 1.94 |
| 6 | 8 | -7  | 21.66  | 1.46 |
| 6 | 8 | -7  | 18.97  | 1.37 |
| 6 | 8 | -7  | 22.37  | 1.72 |
| 6 | 8 | -6  | 42.59  | 2.32 |
| 6 | 8 | -6  | 33.66  | 1.92 |
| 6 | 8 | -6  | 37.46  | 2.34 |
| 6 | 8 | -6  | 40.01  | 2.14 |
| 6 | 8 | -6  | 39.82  | 2.29 |
| 6 | 8 | -6  | 34.05  | 2.11 |
| 6 | 8 | -5  | 2.62   | 0.93 |
| 6 | 8 | -5  | 3.19   | 0.90 |
| 6 | 8 | -5  | 2.72   | 0.99 |
| 6 | 8 | -4  | 0.53   | 0.83 |
| 6 | 8 | -4  | 0.98   | 0.64 |
| 6 | 8 | -4  | 1.05   | 0.89 |
| 6 | 8 | -4  | 1.10   | 0.92 |
| 6 | 8 | -4  | 1.24   | 0.82 |
| 6 | 8 | -4  | 0.66   | 0.77 |
| 6 | 8 | -3  | 78.28  | 2.81 |
| 6 | 8 | -3  | 73.89  | 2.61 |

## CIF 31

|   |     |    |        |      |
|---|-----|----|--------|------|
| 6 | 8   | -3 | 75.51  | 2.96 |
| 6 | 8   | -3 | 68.31  | 2.68 |
| 6 | 8   | -3 | 74.56  | 2.61 |
| 6 | 8   | -2 | 4.96   | 0.83 |
| 6 | 8   | -2 | 4.80   | 0.98 |
| 6 | 8   | -2 | 2.43   | 0.61 |
| 6 | 8   | -2 | 5.41   | 0.89 |
| 6 | 8   | -1 | 45.88  | 1.84 |
| 6 | 8   | -1 | 42.17  | 1.91 |
| 7 | -13 | 1  | 206.23 | 3.80 |
| 7 | -13 | 1  | 239.32 | 3.62 |
| 7 | -13 | 2  | 143.57 | 3.12 |
| 7 | -13 | 2  | 191.56 | 3.06 |
| 7 | -12 | -4 | 8.03   | 0.63 |
| 7 | -12 | -4 | 11.05  | 0.95 |
| 7 | -12 | -3 | 193.63 | 3.90 |
| 7 | -12 | -3 | 212.04 | 3.40 |
| 7 | -12 | -2 | 8.10   | 1.06 |
| 7 | -12 | -2 | 8.34   | 0.96 |
| 7 | -12 | -1 | 2.25   | 0.70 |
| 7 | -12 | -1 | 1.52   | 0.64 |
| 7 | -12 | -1 | 0.99   | 0.54 |
| 7 | -12 | 0  | 31.87  | 1.75 |
| 7 | -12 | 0  | 32.45  | 1.66 |
| 7 | -12 | 0  | 30.08  | 1.66 |
| 7 | -12 | 1  | 8.80   | 1.02 |
| 7 | -12 | 1  | 8.78   | 1.11 |
| 7 | -12 | 1  | 8.91   | 1.00 |
| 7 | -12 | 1  | 8.76   | 1.00 |
| 7 | -12 | 2  | 105.71 | 3.34 |
| 7 | -12 | 2  | 97.36  | 3.05 |
| 7 | -12 | 2  | 107.05 | 3.05 |
| 7 | -12 | 3  | 19.99  | 1.42 |
| 7 | -12 | 3  | 15.46  | 1.31 |
| 7 | -12 | 3  | 16.91  | 1.29 |
| 7 | -12 | 3  | 21.11  | 1.31 |
| 7 | -12 | 4  | 59.40  | 2.26 |
| 7 | -12 | 4  | 66.40  | 2.32 |
| 7 | -12 | 4  | 63.83  | 1.94 |
| 7 | -12 | 4  | 55.25  | 2.04 |
| 7 | -12 | 5  | 20.80  | 1.28 |

## CIF 31

|       |    |        |      |
|-------|----|--------|------|
| 7 -12 | 5  | 14.51  | 0.91 |
| 7 -12 | 5  | 19.69  | 1.24 |
| 7 -12 | 5  | 12.19  | 0.68 |
| 7 -12 | 5  | 17.83  | 1.16 |
| 7 -12 | 6  | 1.95   | 0.54 |
| 7 -12 | 6  | 1.48   | 0.49 |
| 7 -12 | 6  | 1.33   | 0.46 |
| 7 -11 | -6 | 132.33 | 3.40 |
| 7 -11 | -6 | 153.12 | 3.34 |
| 7 -11 | -5 | 99.10  | 2.68 |
| 7 -11 | -4 | 49.95  | 2.28 |
| 7 -11 | -4 | 47.51  | 2.17 |
| 7 -11 | -4 | 51.06  | 2.17 |
| 7 -11 | -4 | 56.37  | 1.94 |
| 7 -11 | -3 | 208.10 | 4.53 |
| 7 -11 | -3 | 215.28 | 5.11 |
| 7 -11 | -3 | 202.25 | 5.26 |
| 7 -11 | -3 | 225.88 | 5.21 |
| 7 -11 | -3 | 239.36 | 5.18 |
| 7 -11 | -2 | 119.23 | 3.45 |
| 7 -11 | -2 | 136.09 | 4.05 |
| 7 -11 | -2 | 124.91 | 4.14 |
| 7 -11 | -2 | 125.71 | 4.00 |
| 7 -11 | -2 | 138.33 | 4.02 |
| 7 -11 | -1 | 227.19 | 4.88 |
| 7 -11 | -1 | 210.12 | 4.75 |
| 7 -11 | -1 | 240.76 | 5.59 |
| 7 -11 | -1 | 224.53 | 5.75 |
| 7 -11 | -1 | 213.63 | 5.46 |
| 7 -11 | -1 | 233.80 | 5.46 |
| 7 -11 | 0  | 226.61 | 5.63 |
| 7 -11 | 0  | 216.53 | 4.75 |
| 7 -11 | 0  | 216.75 | 4.96 |
| 7 -11 | 0  | 222.43 | 5.54 |
| 7 -11 | 0  | 202.76 | 5.48 |
| 7 -11 | 0  | 208.03 | 5.37 |
| 7 -11 | 0  | 215.43 | 5.36 |
| 7 -11 | 1  | 39.40  | 2.41 |
| 7 -11 | 1  | 39.34  | 2.42 |
| 7 -11 | 1  | 39.02  | 2.19 |
| 7 -11 | 1  | 40.34  | 2.42 |



## CIF 31

|       |   |       |      |
|-------|---|-------|------|
| 7 -11 | 1 | 42.71 | 2.47 |
| 7 -11 | 1 | 36.65 | 2.28 |
| 7 -11 | 1 | 37.20 | 2.24 |
| 7 -11 | 2 | 7.44  | 1.31 |
| 7 -11 | 2 | 6.84  | 2.10 |
| 7 -11 | 2 | 5.08  | 1.21 |
| 7 -11 | 2 | 7.03  | 1.16 |
| 7 -11 | 2 | 5.60  | 1.11 |
| 7 -11 | 2 | 6.35  | 1.16 |
| 7 -11 | 2 | 4.41  | 0.99 |
| 7 -11 | 2 | 8.87  | 1.40 |
| 7 -11 | 2 | 9.48  | 1.22 |
| 7 -11 | 3 | 6.58  | 1.18 |
| 7 -11 | 3 | 5.53  | 1.26 |
| 7 -11 | 3 | 5.33  | 1.07 |
| 7 -11 | 3 | 5.49  | 1.08 |
| 7 -11 | 3 | 5.66  | 1.10 |
| 7 -11 | 3 | 4.17  | 0.96 |
| 7 -11 | 3 | 5.36  | 1.29 |
| 7 -11 | 3 | 5.76  | 1.03 |
| 7 -11 | 4 | 12.25 | 1.38 |
| 7 -11 | 4 | 12.10 | 1.50 |
| 7 -11 | 4 | 12.79 | 1.37 |
| 7 -11 | 4 | 12.47 | 1.37 |
| 7 -11 | 4 | 12.74 | 1.41 |
| 7 -11 | 4 | 12.66 | 1.30 |
| 7 -11 | 4 | 11.42 | 1.51 |
| 7 -11 | 4 | 12.30 | 1.16 |
| 7 -11 | 5 | 0.73  | 0.73 |
| 7 -11 | 5 | 1.48  | 0.55 |
| 7 -11 | 5 | 0.86  | 1.06 |
| 7 -11 | 5 | 1.31  | 0.73 |
| 7 -11 | 5 | 0.27  | 0.67 |
| 7 -11 | 5 | 0.57  | 0.62 |
| 7 -11 | 5 | 0.03  | 0.61 |
| 7 -11 | 5 | 0.24  | 0.59 |
| 7 -11 | 6 | 0.02  | 0.64 |
| 7 -11 | 6 | 0.56  | 0.93 |
| 7 -11 | 6 | 0.05  | 0.58 |
| 7 -11 | 6 | 0.21  | 0.60 |
| 7 -11 | 6 | -0.08 | 0.55 |

## CIF 31

|       |    |        |      |
|-------|----|--------|------|
| 7 -11 | 6  | 0.34   | 0.60 |
| 7 -11 | 7  | 84.23  | 2.47 |
| 7 -11 | 7  | 87.87  | 2.63 |
| 7 -10 | -8 | 56.06  | 1.80 |
| 7 -10 | -7 | 0.92   | 0.62 |
| 7 -10 | -7 | 1.01   | 0.58 |
| 7 -10 | -7 | 0.75   | 0.61 |
| 7 -10 | -6 | 3.19   | 0.90 |
| 7 -10 | -6 | 3.16   | 0.78 |
| 7 -10 | -6 | 2.84   | 0.84 |
| 7 -10 | -6 | 3.53   | 0.81 |
| 7 -10 | -5 | 282.20 | 5.67 |
| 7 -10 | -5 | 280.53 | 6.52 |
| 7 -10 | -5 | 259.56 | 5.90 |
| 7 -10 | -5 | 262.09 | 6.29 |
| 7 -10 | -5 | 286.63 | 6.34 |
| 7 -10 | -5 | 288.39 | 6.18 |
| 7 -10 | -5 | 293.85 | 5.58 |
| 7 -10 | -5 | 278.22 | 4.99 |
| 7 -10 | -4 | 79.76  | 2.92 |
| 7 -10 | -4 | 67.96  | 2.82 |
| 7 -10 | -4 | 75.78  | 3.49 |
| 7 -10 | -4 | 77.62  | 3.24 |
| 7 -10 | -4 | 76.49  | 3.40 |
| 7 -10 | -4 | 76.28  | 3.29 |
| 7 -10 | -4 | 82.81  | 3.36 |
| 7 -10 | -4 | 91.51  | 2.99 |
| 7 -10 | -4 | 82.10  | 2.91 |
| 7 -10 | -3 | 185.33 | 4.77 |
| 7 -10 | -3 | 176.48 | 4.59 |
| 7 -10 | -3 | 173.18 | 4.69 |
| 7 -10 | -3 | 168.63 | 4.54 |
| 7 -10 | -3 | 204.28 | 5.82 |
| 7 -10 | -3 | 189.04 | 5.19 |
| 7 -10 | -3 | 170.70 | 5.25 |
| 7 -10 | -3 | 175.58 | 5.19 |
| 7 -10 | -3 | 192.57 | 5.30 |
| 7 -10 | -3 | 178.46 | 4.23 |
| 7 -10 | -2 | 114.66 | 3.87 |
| 7 -10 | -2 | 108.77 | 3.75 |
| 7 -10 | -2 | 109.25 | 3.83 |

## CIF 31

|   |     |    |        |      |
|---|-----|----|--------|------|
| 7 | -10 | -2 | 96.30  | 3.43 |
| 7 | -10 | -2 | 103.76 | 3.86 |
| 7 | -10 | -2 | 101.23 | 4.06 |
| 7 | -10 | -2 | 96.78  | 3.93 |
| 7 | -10 | -2 | 92.61  | 3.48 |
| 7 | -10 | -2 | 107.03 | 4.04 |
| 7 | -10 | -1 | 91.16  | 3.84 |
| 7 | -10 | -1 | 89.88  | 3.78 |
| 7 | -10 | -1 | 91.16  | 3.61 |
| 7 | -10 | -1 | 90.95  | 3.82 |
| 7 | -10 | -1 | 84.90  | 3.73 |
| 7 | -10 | -1 | 91.22  | 3.88 |
| 7 | -10 | -1 | 86.38  | 3.51 |
| 7 | -10 | -1 | 94.04  | 3.86 |
| 7 | -10 | 0  | 230.60 | 6.10 |
| 7 | -10 | 0  | 217.98 | 6.08 |
| 7 | -10 | 0  | 211.48 | 5.86 |
| 7 | -10 | 0  | 230.79 | 6.27 |
| 7 | -10 | 0  | 212.70 | 6.02 |
| 7 | -10 | 0  | 203.07 | 5.59 |
| 7 | -10 | 0  | 223.96 | 6.06 |
| 7 | -10 | 1  | 2.98   | 1.16 |
| 7 | -10 | 1  | 7.11   | 1.40 |
| 7 | -10 | 1  | 2.51   | 0.98 |
| 7 | -10 | 1  | 6.25   | 1.31 |
| 7 | -10 | 1  | 2.51   | 1.06 |
| 7 | -10 | 1  | 2.33   | 1.21 |
| 7 | -10 | 2  | 95.49  | 3.75 |
| 7 | -10 | 2  | 102.73 | 4.28 |
| 7 | -10 | 2  | 123.47 | 4.06 |
| 7 | -10 | 2  | 109.41 | 4.10 |
| 7 | -10 | 2  | 115.71 | 4.14 |
| 7 | -10 | 2  | 95.82  | 3.95 |
| 7 | -10 | 2  | 94.98  | 3.88 |
| 7 | -10 | 2  | 99.20  | 4.07 |
| 7 | -10 | 2  | 92.07  | 3.76 |
| 7 | -10 | 3  | 40.03  | 2.49 |
| 7 | -10 | 3  | 41.23  | 3.05 |
| 7 | -10 | 3  | 49.35  | 2.48 |
| 7 | -10 | 3  | 42.17  | 2.56 |
| 7 | -10 | 3  | 43.53  | 2.52 |

## CIF 31

|       |    |       |      |
|-------|----|-------|------|
| 7 -10 | 3  | 39.54 | 2.48 |
| 7 -10 | 3  | 41.27 | 2.68 |
| 7 -10 | 3  | 36.62 | 2.45 |
| 7 -10 | 4  | 42.83 | 2.54 |
| 7 -10 | 4  | 49.82 | 2.69 |
| 7 -10 | 4  | 44.70 | 2.18 |
| 7 -10 | 4  | 44.85 | 2.52 |
| 7 -10 | 4  | 47.24 | 2.61 |
| 7 -10 | 4  | 45.14 | 2.68 |
| 7 -10 | 4  | 40.84 | 2.55 |
| 7 -10 | 4  | 47.00 | 3.15 |
| 7 -10 | 4  | 47.97 | 2.30 |
| 7 -10 | 5  | 40.85 | 2.41 |
| 7 -10 | 5  | 38.01 | 1.89 |
| 7 -10 | 5  | 40.86 | 2.30 |
| 7 -10 | 5  | 40.03 | 2.33 |
| 7 -10 | 5  | 31.68 | 2.32 |
| 7 -10 | 5  | 37.39 | 2.37 |
| 7 -10 | 5  | 38.61 | 1.84 |
| 7 -10 | 5  | 41.21 | 2.42 |
| 7 -10 | 6  | 21.47 | 1.69 |
| 7 -10 | 6  | 17.25 | 1.19 |
| 7 -10 | 6  | 20.51 | 1.59 |
| 7 -10 | 6  | 20.14 | 1.65 |
| 7 -10 | 6  | 18.96 | 1.55 |
| 7 -10 | 6  | 17.70 | 1.63 |
| 7 -10 | 7  | 14.74 | 1.34 |
| 7 -10 | 7  | 16.50 | 1.30 |
| 7 -10 | 7  | 16.80 | 1.41 |
| 7 -10 | 7  | 12.25 | 1.16 |
| 7 -10 | 7  | 13.32 | 1.32 |
| 7 -10 | 7  | 12.32 | 1.29 |
| 7 -10 | 8  | 40.82 | 1.71 |
| 7 -10 | 8  | 37.35 | 1.72 |
| 7 -10 | 9  | -0.27 | 0.56 |
| 7 -9  | -9 | 28.56 | 1.08 |
| 7 -9  | -9 | 22.19 | 1.18 |
| 7 -9  | -8 | 3.14  | 0.59 |
| 7 -9  | -8 | 4.55  | 1.04 |
| 7 -9  | -8 | 2.95  | 0.81 |
| 7 -9  | -8 | 3.03  | 0.83 |

## CIF 31

|   |    |    |        |      |
|---|----|----|--------|------|
| 7 | -9 | -8 | 2.80   | 0.82 |
| 7 | -9 | -7 | 3.67   | 0.69 |
| 7 | -9 | -7 | 5.34   | 1.19 |
| 7 | -9 | -7 | 4.96   | 1.08 |
| 7 | -9 | -7 | 3.83   | 0.99 |
| 7 | -9 | -7 | 4.09   | 1.02 |
| 7 | -9 | -7 | 4.85   | 1.03 |
| 7 | -9 | -6 | 99.98  | 2.74 |
| 7 | -9 | -6 | 100.09 | 3.62 |
| 7 | -9 | -6 | 91.01  | 3.85 |
| 7 | -9 | -6 | 88.54  | 3.50 |
| 7 | -9 | -6 | 93.37  | 3.87 |
| 7 | -9 | -6 | 99.67  | 3.94 |
| 7 | -9 | -6 | 105.25 | 3.92 |
| 7 | -9 | -6 | 110.16 | 3.56 |
| 7 | -9 | -5 | 1.05   | 0.76 |
| 7 | -9 | -5 | 0.19   | 0.80 |
| 7 | -9 | -5 | 0.66   | 0.71 |
| 7 | -9 | -5 | 0.48   | 0.93 |
| 7 | -9 | -5 | 0.25   | 0.83 |
| 7 | -9 | -5 | -0.24  | 0.85 |
| 7 | -9 | -5 | 0.91   | 0.92 |
| 7 | -9 | -5 | 0.27   | 0.98 |
| 7 | -9 | -5 | 1.03   | 0.81 |
| 7 | -9 | -4 | 19.60  | 1.83 |
| 7 | -9 | -4 | 21.12  | 1.88 |
| 7 | -9 | -4 | 13.24  | 1.43 |
| 7 | -9 | -4 | 17.91  | 1.97 |
| 7 | -9 | -4 | 15.83  | 1.67 |
| 7 | -9 | -4 | 16.01  | 1.80 |
| 7 | -9 | -4 | 15.21  | 1.76 |
| 7 | -9 | -4 | 16.22  | 1.63 |
| 7 | -9 | -4 | 16.67  | 1.58 |
| 7 | -9 | -4 | 19.21  | 1.92 |
| 7 | -9 | -4 | 19.46  | 1.59 |
| 7 | -9 | -3 | 1.90   | 1.14 |
| 7 | -9 | -3 | 0.88   | 0.94 |
| 7 | -9 | -3 | 1.12   | 0.86 |
| 7 | -9 | -3 | 0.20   | 0.90 |
| 7 | -9 | -3 | 1.31   | 1.08 |
| 7 | -9 | -3 | 0.91   | 0.83 |

## CIF 31

|   |    |    |        |       |
|---|----|----|--------|-------|
| 7 | -9 | -3 | 1.86   | 0.84  |
| 7 | -9 | -3 | -0.24  | 0.96  |
| 7 | -9 | -3 | 0.64   | 0.70  |
| 7 | -9 | -2 | 462.22 | 9.31  |
| 7 | -9 | -2 | 487.67 | 9.85  |
| 7 | -9 | -2 | 544.10 | 9.88  |
| 7 | -9 | -2 | 498.54 | 9.82  |
| 7 | -9 | -2 | 500.64 | 9.96  |
| 7 | -9 | -2 | 462.69 | 9.28  |
| 7 | -9 | -2 | 514.35 | 8.58  |
| 7 | -9 | -2 | 501.22 | 9.75  |
| 7 | -9 | -1 | 42.45  | 2.96  |
| 7 | -9 | -1 | 54.45  | 3.05  |
| 7 | -9 | -1 | 43.19  | 3.71  |
| 7 | -9 | -1 | 49.96  | 2.96  |
| 7 | -9 | -1 | 43.74  | 2.84  |
| 7 | -9 | -1 | 40.79  | 2.78  |
| 7 | -9 | -1 | 44.77  | 2.83  |
| 7 | -9 | -1 | 45.97  | 2.98  |
| 7 | -9 | 0  | 168.63 | 5.34  |
| 7 | -9 | 0  | 178.16 | 5.34  |
| 7 | -9 | 0  | 189.35 | 5.63  |
| 7 | -9 | 0  | 203.18 | 5.87  |
| 7 | -9 | 0  | 208.11 | 6.23  |
| 7 | -9 | 0  | 171.08 | 5.45  |
| 7 | -9 | 0  | 181.34 | 5.76  |
| 7 | -9 | 0  | 181.92 | 5.80  |
| 7 | -9 | 1  | 60.47  | 3.20  |
| 7 | -9 | 1  | 59.59  | 3.30  |
| 7 | -9 | 1  | 62.62  | 3.24  |
| 7 | -9 | 1  | 56.29  | 3.20  |
| 7 | -9 | 1  | 62.84  | 3.19  |
| 7 | -9 | 1  | 56.89  | 3.06  |
| 7 | -9 | 1  | 60.71  | 3.39  |
| 7 | -9 | 1  | 50.57  | 3.08  |
| 7 | -9 | 1  | 60.67  | 3.49  |
| 7 | -9 | 2  | 676.69 | 11.59 |
| 7 | -9 | 2  | 675.32 | 11.42 |
| 7 | -9 | 2  | 677.85 | 11.37 |
| 7 | -9 | 2  | 638.73 | 9.93  |
| 7 | -9 | 2  | 657.95 | 11.33 |

## CIF 31

|   |    |   |        |       |
|---|----|---|--------|-------|
| 7 | -9 | 2 | 667.83 | 11.30 |
| 7 | -9 | 2 | 620.56 | 10.95 |
| 7 | -9 | 2 | 646.86 | 11.71 |
| 7 | -9 | 2 | 664.18 | 12.00 |
| 7 | -9 | 3 | 0.86   | 0.95  |
| 7 | -9 | 3 | 0.68   | 1.06  |
| 7 | -9 | 3 | 1.15   | 1.04  |
| 7 | -9 | 3 | 1.62   | 0.80  |
| 7 | -9 | 3 | 0.17   | 0.90  |
| 7 | -9 | 3 | 0.94   | 0.99  |
| 7 | -9 | 3 | 0.63   | 0.87  |
| 7 | -9 | 3 | 1.29   | 1.13  |
| 7 | -9 | 3 | 0.16   | 0.98  |
| 7 | -9 | 4 | 4.45   | 1.12  |
| 7 | -9 | 4 | 4.94   | 1.28  |
| 7 | -9 | 4 | 4.18   | 0.91  |
| 7 | -9 | 4 | 4.69   | 1.19  |
| 7 | -9 | 4 | 5.45   | 1.14  |
| 7 | -9 | 4 | 4.23   | 1.20  |
| 7 | -9 | 5 | 82.63  | 3.78  |
| 7 | -9 | 5 | 78.17  | 2.80  |
| 7 | -9 | 5 | 85.38  | 3.43  |
| 7 | -9 | 5 | 82.67  | 3.57  |
| 7 | -9 | 5 | 76.07  | 3.30  |
| 7 | -9 | 5 | 83.66  | 3.75  |
| 7 | -9 | 5 | 92.96  | 3.81  |
| 7 | -9 | 5 | 78.99  | 2.78  |
| 7 | -9 | 5 | 78.49  | 3.65  |
| 7 | -9 | 6 | 32.82  | 2.10  |
| 7 | -9 | 6 | 29.37  | 2.08  |
| 7 | -9 | 6 | 26.39  | 1.91  |
| 7 | -9 | 6 | 28.52  | 2.18  |
| 7 | -9 | 6 | 34.26  | 2.39  |
| 7 | -9 | 6 | 29.07  | 2.23  |
| 7 | -9 | 7 | 64.71  | 2.64  |
| 7 | -9 | 7 | 61.24  | 2.74  |
| 7 | -9 | 7 | 57.90  | 2.82  |
| 7 | -9 | 8 | 2.58   | 0.67  |
| 7 | -9 | 8 | 2.53   | 0.77  |
| 7 | -9 | 8 | 1.53   | 0.71  |
| 7 | -9 | 9 | 523.86 | 6.51  |

## CIF 31

|   |    |     |        |      |
|---|----|-----|--------|------|
| 7 | -8 | -11 | 43.46  | 1.26 |
| 7 | -8 | -11 | 47.80  | 1.55 |
| 7 | -8 | -10 | 38.00  | 1.57 |
| 7 | -8 | -9  | 62.40  | 2.27 |
| 7 | -8 | -9  | 58.17  | 2.46 |
| 7 | -8 | -9  | 55.11  | 2.69 |
| 7 | -8 | -9  | 62.54  | 2.57 |
| 7 | -8 | -9  | 58.18  | 2.56 |
| 7 | -8 | -8  | 419.60 | 7.96 |
| 7 | -8 | -8  | 384.92 | 8.11 |
| 7 | -8 | -8  | 388.19 | 8.14 |
| 7 | -8 | -8  | 379.09 | 8.15 |
| 7 | -8 | -8  | 413.04 | 8.07 |
| 7 | -8 | -8  | 397.21 | 8.01 |
| 7 | -8 | -7  | 62.95  | 3.18 |
| 7 | -8 | -7  | 54.84  | 3.09 |
| 7 | -8 | -7  | 52.31  | 3.02 |
| 7 | -8 | -7  | 48.17  | 2.93 |
| 7 | -8 | -7  | 52.18  | 2.67 |
| 7 | -8 | -7  | 54.54  | 3.02 |
| 7 | -8 | -7  | 52.67  | 2.65 |
| 7 | -8 | -6  | 36.38  | 2.48 |
| 7 | -8 | -6  | 33.56  | 2.51 |
| 7 | -8 | -6  | 33.05  | 2.29 |
| 7 | -8 | -6  | 37.33  | 2.64 |
| 7 | -8 | -6  | 33.84  | 2.55 |
| 7 | -8 | -6  | 35.06  | 2.33 |
| 7 | -8 | -6  | 30.31  | 2.16 |
| 7 | -8 | -6  | 35.30  | 2.60 |
| 7 | -8 | -6  | 36.67  | 2.23 |
| 7 | -8 | -5  | 1.00   | 1.04 |
| 7 | -8 | -5  | 1.25   | 0.94 |
| 7 | -8 | -5  | 1.88   | 1.02 |
| 7 | -8 | -5  | 2.56   | 0.97 |
| 7 | -8 | -5  | 1.86   | 0.99 |
| 7 | -8 | -5  | 0.95   | 1.03 |
| 7 | -8 | -5  | 1.24   | 0.83 |
| 7 | -8 | -5  | 1.63   | 0.81 |
| 7 | -8 | -5  | 1.56   | 1.09 |
| 7 | -8 | -5  | 5.42   | 1.06 |
| 7 | -8 | -4  | 453.30 | 8.83 |



## CIF 31

|   |    |    |        |       |
|---|----|----|--------|-------|
| 7 | -8 | -4 | 577.79 | 10.45 |
| 7 | -8 | -4 | 520.24 | 10.01 |
| 7 | -8 | -4 | 506.67 | 9.72  |
| 7 | -8 | -4 | 480.05 | 9.14  |
| 7 | -8 | -4 | 465.40 | 9.56  |
| 7 | -8 | -4 | 531.22 | 10.33 |
| 7 | -8 | -4 | 479.75 | 9.50  |
| 7 | -8 | -4 | 488.17 | 8.84  |
| 7 | -8 | -4 | 512.27 | 10.15 |
| 7 | -8 | -4 | 572.03 | 8.94  |
| 7 | -8 | -3 | 180.58 | 5.45  |
| 7 | -8 | -3 | 187.37 | 5.58  |
| 7 | -8 | -3 | 180.31 | 5.54  |
| 7 | -8 | -3 | 184.96 | 6.00  |
| 7 | -8 | -3 | 192.24 | 5.76  |
| 7 | -8 | -3 | 169.48 | 5.48  |
| 7 | -8 | -3 | 202.11 | 5.50  |
| 7 | -8 | -3 | 181.70 | 5.33  |
| 7 | -8 | -3 | 211.21 | 6.01  |
| 7 | -8 | -3 | 220.30 | 6.40  |
| 7 | -8 | -3 | 181.34 | 5.70  |
| 7 | -8 | -3 | 184.35 | 5.00  |
| 7 | -8 | -3 | 201.76 | 6.00  |
| 7 | -8 | -3 | 181.45 | 4.59  |
| 7 | -8 | -2 | 174.42 | 5.48  |
| 7 | -8 | -2 | 180.87 | 5.49  |
| 7 | -8 | -2 | 184.11 | 5.38  |
| 7 | -8 | -2 | 158.78 | 5.76  |
| 7 | -8 | -2 | 168.87 | 5.37  |
| 7 | -8 | -2 | 183.58 | 5.53  |
| 7 | -8 | -2 | 174.19 | 5.66  |
| 7 | -8 | -2 | 178.44 | 5.65  |
| 7 | -8 | -2 | 157.91 | 5.17  |
| 7 | -8 | -2 | 165.25 | 4.62  |
| 7 | -8 | -2 | 188.49 | 5.77  |
| 7 | -8 | -1 | 407.15 | 8.68  |
| 7 | -8 | -1 | 445.95 | 8.24  |
| 7 | -8 | -1 | 418.87 | 8.59  |
| 7 | -8 | -1 | 403.21 | 7.99  |
| 7 | -8 | -1 | 416.90 | 8.77  |
| 7 | -8 | -1 | 402.30 | 8.69  |

## CIF 31

|   |    |    |        |      |
|---|----|----|--------|------|
| 7 | -8 | -1 | 388.87 | 8.39 |
| 7 | -8 | -1 | 464.62 | 9.34 |
| 7 | -8 | -1 | 403.26 | 8.68 |
| 7 | -8 | -1 | 375.72 | 7.10 |
| 7 | -8 | -1 | 441.00 | 9.07 |
| 7 | -8 | 0  | 39.66  | 2.68 |
| 7 | -8 | 0  | 39.64  | 2.44 |
| 7 | -8 | 0  | 34.63  | 2.49 |
| 7 | -8 | 0  | 36.00  | 2.61 |
| 7 | -8 | 0  | 39.81  | 2.54 |
| 7 | -8 | 0  | 37.37  | 2.67 |
| 7 | -8 | 0  | 47.21  | 2.78 |
| 7 | -8 | 0  | 42.60  | 2.86 |
| 7 | -8 | 0  | 40.44  | 2.75 |
| 7 | -8 | 1  | 25.74  | 2.28 |
| 7 | -8 | 1  | 29.37  | 2.23 |
| 7 | -8 | 1  | 27.64  | 2.17 |
| 7 | -8 | 1  | 26.02  | 2.10 |
| 7 | -8 | 1  | 26.30  | 2.28 |
| 7 | -8 | 1  | 22.97  | 1.97 |
| 7 | -8 | 1  | 22.64  | 2.27 |
| 7 | -8 | 1  | 31.61  | 2.48 |
| 7 | -8 | 2  | 28.75  | 2.26 |
| 7 | -8 | 2  | 25.52  | 2.14 |
| 7 | -8 | 2  | 26.31  | 1.80 |
| 7 | -8 | 2  | 31.39  | 2.22 |
| 7 | -8 | 2  | 31.02  | 2.41 |
| 7 | -8 | 2  | 23.78  | 2.03 |
| 7 | -8 | 2  | 27.35  | 2.42 |
| 7 | -8 | 2  | 26.76  | 2.46 |
| 7 | -8 | 2  | 33.04  | 2.53 |
| 7 | -8 | 2  | 28.57  | 2.44 |
| 7 | -8 | 3  | 49.13  | 2.92 |
| 7 | -8 | 3  | 44.24  | 2.68 |
| 7 | -8 | 3  | 46.61  | 2.83 |
| 7 | -8 | 3  | 42.20  | 2.62 |
| 7 | -8 | 3  | 42.43  | 2.93 |
| 7 | -8 | 3  | 42.28  | 2.90 |
| 7 | -8 | 3  | 42.30  | 2.93 |
| 7 | -8 | 4  | 162.28 | 5.27 |
| 7 | -8 | 4  | 151.14 | 4.73 |

## CIF 31

|   |    |     |        |      |
|---|----|-----|--------|------|
| 7 | -8 | 4   | 156.97 | 5.11 |
| 7 | -8 | 4   | 143.34 | 4.73 |
| 7 | -8 | 4   | 144.27 | 5.19 |
| 7 | -8 | 4   | 160.21 | 5.48 |
| 7 | -8 | 4   | 144.05 | 5.37 |
| 7 | -8 | 5   | 208.14 | 5.56 |
| 7 | -8 | 5   | 201.74 | 5.48 |
| 7 | -8 | 5   | 207.49 | 6.07 |
| 7 | -8 | 5   | 223.78 | 6.34 |
| 7 | -8 | 6   | 350.29 | 7.10 |
| 7 | -8 | 6   | 355.75 | 7.23 |
| 7 | -8 | 6   | 336.68 | 7.70 |
| 7 | -8 | 7   | 25.78  | 1.77 |
| 7 | -8 | 7   | 24.12  | 1.71 |
| 7 | -8 | 7   | 23.60  | 1.91 |
| 7 | -8 | 7   | 24.71  | 2.04 |
| 7 | -8 | 8   | 1.18   | 0.60 |
| 7 | -8 | 8   | 1.69   | 0.82 |
| 7 | -8 | 9   | 48.29  | 1.93 |
| 7 | -7 | -12 | 5.80   | 0.61 |
| 7 | -7 | -12 | 4.57   | 0.57 |
| 7 | -7 | -11 | 2.58   | 0.71 |
| 7 | -7 | -11 | 2.62   | 0.74 |
| 7 | -7 | -10 | 315.79 | 6.58 |
| 7 | -7 | -10 | 293.98 | 6.66 |
| 7 | -7 | -10 | 298.85 | 6.04 |
| 7 | -7 | -9  | 1.53   | 0.98 |
| 7 | -7 | -9  | 2.87   | 1.01 |
| 7 | -7 | -9  | 1.79   | 0.93 |
| 7 | -7 | -9  | 1.10   | 0.77 |
| 7 | -7 | -9  | 3.03   | 1.05 |
| 7 | -7 | -9  | 2.47   | 0.99 |
| 7 | -7 | -8  | 28.62  | 2.36 |
| 7 | -7 | -8  | 26.28  | 2.25 |
| 7 | -7 | -8  | 26.74  | 2.25 |
| 7 | -7 | -8  | 26.49  | 2.32 |
| 7 | -7 | -8  | 24.58  | 2.09 |
| 7 | -7 | -8  | 28.16  | 1.99 |
| 7 | -7 | -8  | 24.57  | 2.22 |
| 7 | -7 | -8  | 30.44  | 2.37 |
| 7 | -7 | -7  | 436.46 | 9.32 |

## CIF 31

|   |    |    |         |       |
|---|----|----|---------|-------|
| 7 | -7 | -7 | 428.50  | 8.90  |
| 7 | -7 | -7 | 365.92  | 8.45  |
| 7 | -7 | -7 | 398.54  | 8.94  |
| 7 | -7 | -7 | 365.08  | 8.12  |
| 7 | -7 | -7 | 426.75  | 8.17  |
| 7 | -7 | -7 | 411.66  | 8.92  |
| 7 | -7 | -6 | 2.91    | 0.95  |
| 7 | -7 | -6 | 3.65    | 1.24  |
| 7 | -7 | -6 | 4.17    | 1.31  |
| 7 | -7 | -6 | 4.16    | 1.25  |
| 7 | -7 | -6 | 4.74    | 1.24  |
| 7 | -7 | -6 | 3.65    | 1.01  |
| 7 | -7 | -6 | 4.34    | 1.22  |
| 7 | -7 | -6 | 3.01    | 1.15  |
| 7 | -7 | -6 | 4.24    | 1.17  |
| 7 | -7 | -6 | 4.72    | 1.37  |
| 7 | -7 | -5 | 1214.99 | 16.51 |
| 7 | -7 | -5 | 1337.68 | 16.95 |
| 7 | -7 | -5 | 1256.70 | 17.46 |
| 7 | -7 | -5 | 1226.08 | 17.26 |
| 7 | -7 | -5 | 1214.71 | 16.91 |
| 7 | -7 | -5 | 1233.54 | 17.23 |
| 7 | -7 | -5 | 1091.26 | 15.55 |
| 7 | -7 | -5 | 1151.23 | 15.72 |
| 7 | -7 | -5 | 1306.80 | 17.24 |
| 7 | -7 | -5 | 1104.10 | 16.91 |
| 7 | -7 | -5 | 1172.65 | 16.99 |
| 7 | -7 | -5 | 1336.63 | 16.34 |
| 7 | -7 | -5 | 1156.99 | 16.87 |
| 7 | -7 | -4 | 1481.93 | 18.92 |
| 7 | -7 | -4 | 1386.99 | 18.82 |
| 7 | -7 | -4 | 1534.38 | 19.69 |
| 7 | -7 | -4 | 1454.50 | 19.49 |
| 7 | -7 | -4 | 1480.66 | 19.25 |
| 7 | -7 | -4 | 1463.50 | 18.88 |
| 7 | -7 | -4 | 1489.45 | 18.02 |
| 7 | -7 | -4 | 1514.88 | 18.77 |
| 7 | -7 | -4 | 1365.18 | 18.54 |
| 7 | -7 | -4 | 1451.84 | 19.34 |
| 7 | -7 | -3 | 1418.57 | 19.16 |
| 7 | -7 | -3 | 1518.05 | 19.03 |

## CIF 31

|   |    |    |         |       |
|---|----|----|---------|-------|
| 7 | -7 | -3 | 1552.96 | 19.66 |
| 7 | -7 | -3 | 1434.94 | 19.69 |
| 7 | -7 | -3 | 1620.90 | 20.05 |
| 7 | -7 | -3 | 1443.67 | 18.83 |
| 7 | -7 | -3 | 1548.16 | 18.19 |
| 7 | -7 | -3 | 1410.44 | 18.85 |
| 7 | -7 | -3 | 1475.43 | 19.80 |
| 7 | -7 | -3 | 1464.81 | 18.94 |
| 7 | -7 | -3 | 1497.34 | 18.38 |
| 7 | -7 | -3 | 1657.82 | 17.50 |
| 7 | -7 | -2 | 1648.81 | 21.73 |
| 7 | -7 | -2 | 1798.11 | 20.03 |
| 7 | -7 | -2 | 1919.30 | 21.63 |
| 7 | -7 | -2 | 1821.91 | 21.75 |
| 7 | -7 | -2 | 1829.40 | 21.59 |
| 7 | -7 | -2 | 1713.53 | 21.43 |
| 7 | -7 | -2 | 1810.37 | 21.46 |
| 7 | -7 | -2 | 1749.55 | 22.14 |
| 7 | -7 | -2 | 1825.20 | 21.42 |
| 7 | -7 | -1 | 1879.26 | 22.65 |
| 7 | -7 | -1 | 1878.99 | 21.05 |
| 7 | -7 | -1 | 1808.95 | 21.41 |
| 7 | -7 | -1 | 1912.76 | 22.07 |
| 7 | -7 | -1 | 1948.70 | 22.20 |
| 7 | -7 | -1 | 1877.47 | 21.55 |
| 7 | -7 | -1 | 1809.01 | 22.76 |
| 7 | -7 | -1 | 1920.34 | 22.13 |
| 7 | -7 | 0  | 104.99  | 4.38  |
| 7 | -7 | 0  | 122.62  | 4.20  |
| 7 | -7 | 0  | 108.77  | 4.01  |
| 7 | -7 | 0  | 112.72  | 3.86  |
| 7 | -7 | 0  | 108.70  | 4.13  |
| 7 | -7 | 0  | 101.17  | 3.85  |
| 7 | -7 | 0  | 107.48  | 4.15  |
| 7 | -7 | 0  | 106.34  | 3.93  |
| 7 | -7 | 0  | 121.73  | 4.62  |
| 7 | -7 | 0  | 97.76   | 4.24  |
| 7 | -7 | 0  | 111.72  | 4.29  |
| 7 | -7 | 1  | 144.10  | 4.61  |
| 7 | -7 | 1  | 129.14  | 4.41  |
| 7 | -7 | 1  | 128.48  | 4.29  |

## CIF 31

|   |    |     |        |       |
|---|----|-----|--------|-------|
| 7 | -7 | 1   | 123.32 | 4.42  |
| 7 | -7 | 1   | 117.64 | 4.14  |
| 7 | -7 | 1   | 104.36 | 4.36  |
| 7 | -7 | 1   | 125.18 | 4.88  |
| 7 | -7 | 1   | 139.80 | 4.81  |
| 7 | -7 | 1   | 133.33 | 4.99  |
| 7 | -7 | 2   | 105.12 | 4.08  |
| 7 | -7 | 2   | 98.01  | 3.71  |
| 7 | -7 | 2   | 91.72  | 3.85  |
| 7 | -7 | 2   | 84.27  | 3.51  |
| 7 | -7 | 2   | 92.76  | 4.09  |
| 7 | -7 | 2   | 93.86  | 4.07  |
| 7 | -7 | 2   | 82.72  | 4.08  |
| 7 | -7 | 3   | 1.59   | 0.93  |
| 7 | -7 | 3   | 1.37   | 0.92  |
| 7 | -7 | 3   | 0.64   | 0.92  |
| 7 | -7 | 3   | 0.78   | 0.80  |
| 7 | -7 | 3   | 0.87   | 1.07  |
| 7 | -7 | 4   | 8.45   | 1.45  |
| 7 | -7 | 4   | 9.68   | 1.39  |
| 7 | -7 | 4   | 11.28  | 1.46  |
| 7 | -7 | 4   | 11.64  | 1.73  |
| 7 | -7 | 4   | 8.97   | 1.49  |
| 7 | -7 | 5   | 808.43 | 12.82 |
| 7 | -7 | 5   | 795.56 | 11.83 |
| 7 | -7 | 5   | 791.96 | 12.97 |
| 7 | -7 | 6   | 242.13 | 6.29  |
| 7 | -7 | 6   | 223.15 | 5.41  |
| 7 | -7 | 7   | 63.18  | 2.63  |
| 7 | -7 | 8   | 3.77   | 0.89  |
| 7 | -7 | 9   | 49.07  | 1.90  |
| 7 | -6 | -12 | 37.73  | 1.97  |
| 7 | -6 | -12 | 42.90  | 1.81  |
| 7 | -6 | -11 | 229.39 | 5.82  |
| 7 | -6 | -11 | 212.37 | 4.85  |
| 7 | -6 | -10 | 12.40  | 1.67  |
| 7 | -6 | -10 | 13.15  | 1.69  |
| 7 | -6 | -10 | 10.23  | 1.42  |
| 7 | -6 | -10 | 12.50  | 1.46  |
| 7 | -6 | -9  | 328.81 | 7.97  |
| 7 | -6 | -9  | 306.17 | 7.41  |

## CIF 31

|   |    |    |        |       |
|---|----|----|--------|-------|
| 7 | -6 | -9 | 317.71 | 7.82  |
| 7 | -6 | -9 | 282.44 | 7.18  |
| 7 | -6 | -9 | 325.23 | 6.20  |
| 7 | -6 | -9 | 320.79 | 6.71  |
| 7 | -6 | -9 | 289.24 | 7.46  |
| 7 | -6 | -9 | 343.10 | 7.77  |
| 7 | -6 | -8 | 66.91  | 3.23  |
| 7 | -6 | -8 | 70.10  | 3.32  |
| 7 | -6 | -8 | 82.72  | 4.01  |
| 7 | -6 | -8 | 69.74  | 3.50  |
| 7 | -6 | -8 | 70.55  | 3.54  |
| 7 | -6 | -8 | 75.38  | 3.85  |
| 7 | -6 | -8 | 73.14  | 3.64  |
| 7 | -6 | -8 | 81.35  | 3.92  |
| 7 | -6 | -8 | 76.05  | 2.90  |
| 7 | -6 | -8 | 80.87  | 3.34  |
| 7 | -6 | -8 | 87.33  | 4.04  |
| 7 | -6 | -7 | 45.03  | 2.76  |
| 7 | -6 | -7 | 48.56  | 2.92  |
| 7 | -6 | -7 | 53.43  | 3.17  |
| 7 | -6 | -7 | 47.59  | 2.94  |
| 7 | -6 | -7 | 46.15  | 2.86  |
| 7 | -6 | -7 | 46.46  | 2.83  |
| 7 | -6 | -7 | 42.63  | 2.87  |
| 7 | -6 | -6 | 26.66  | 2.14  |
| 7 | -6 | -6 | 21.13  | 2.08  |
| 7 | -6 | -6 | 24.01  | 2.00  |
| 7 | -6 | -6 | 23.04  | 2.27  |
| 7 | -6 | -6 | 25.53  | 2.31  |
| 7 | -6 | -6 | 24.68  | 2.12  |
| 7 | -6 | -6 | 22.95  | 1.81  |
| 7 | -6 | -6 | 24.57  | 2.09  |
| 7 | -6 | -6 | 25.30  | 2.08  |
| 7 | -6 | -6 | 23.28  | 2.21  |
| 7 | -6 | -5 | 659.31 | 11.39 |
| 7 | -6 | -5 | 711.96 | 12.03 |
| 7 | -6 | -5 | 655.51 | 11.73 |
| 7 | -6 | -5 | 632.47 | 11.53 |
| 7 | -6 | -5 | 630.58 | 11.43 |
| 7 | -6 | -5 | 734.81 | 11.72 |
| 7 | -6 | -5 | 629.11 | 11.02 |

## CIF 31

|   |    |    |        |       |
|---|----|----|--------|-------|
| 7 | -6 | -5 | 678.12 | 11.19 |
| 7 | -6 | -5 | 646.95 | 11.61 |
| 7 | -6 | -5 | 648.16 | 11.00 |
| 7 | -6 | -5 | 597.52 | 11.03 |
| 7 | -6 | -4 | 136.56 | 4.91  |
| 7 | -6 | -4 | 138.28 | 4.84  |
| 7 | -6 | -4 | 129.07 | 4.96  |
| 7 | -6 | -4 | 134.97 | 4.77  |
| 7 | -6 | -4 | 133.38 | 4.45  |
| 7 | -6 | -4 | 135.52 | 4.78  |
| 7 | -6 | -4 | 125.65 | 4.30  |
| 7 | -6 | -4 | 137.67 | 4.80  |
| 7 | -6 | -4 | 131.87 | 4.84  |
| 7 | -6 | -4 | 115.42 | 4.61  |
| 7 | -6 | -4 | 133.09 | 4.69  |
| 7 | -6 | -3 | 37.28  | 2.61  |
| 7 | -6 | -3 | 29.76  | 2.07  |
| 7 | -6 | -3 | 33.02  | 2.40  |
| 7 | -6 | -3 | 36.47  | 2.81  |
| 7 | -6 | -3 | 29.77  | 2.33  |
| 7 | -6 | -3 | 29.42  | 2.14  |
| 7 | -6 | -3 | 27.98  | 2.01  |
| 7 | -6 | -3 | 28.14  | 2.23  |
| 7 | -6 | -3 | 26.89  | 2.30  |
| 7 | -6 | -3 | 33.85  | 2.52  |
| 7 | -6 | -3 | 35.53  | 2.17  |
| 7 | -6 | -3 | 28.96  | 2.23  |
| 7 | -6 | -2 | 29.94  | 2.38  |
| 7 | -6 | -2 | 29.71  | 1.87  |
| 7 | -6 | -2 | 25.79  | 1.90  |
| 7 | -6 | -2 | 23.66  | 2.02  |
| 7 | -6 | -2 | 26.64  | 2.01  |
| 7 | -6 | -2 | 23.82  | 1.94  |
| 7 | -6 | -2 | 25.96  | 1.88  |
| 7 | -6 | -2 | 23.73  | 2.09  |
| 7 | -6 | -2 | 24.80  | 2.20  |
| 7 | -6 | -2 | 27.69  | 1.99  |
| 7 | -6 | -2 | 24.76  | 2.09  |
| 7 | -6 | -1 | 237.81 | 6.44  |
| 7 | -6 | -1 | 221.61 | 5.43  |
| 7 | -6 | -1 | 227.56 | 5.87  |



## CIF 31

|   |    |     |        |       |
|---|----|-----|--------|-------|
| 7 | -6 | -1  | 219.57 | 5.67  |
| 7 | -6 | -1  | 220.70 | 5.74  |
| 7 | -6 | -1  | 213.05 | 5.33  |
| 7 | -6 | -1  | 235.31 | 6.15  |
| 7 | -6 | -1  | 215.08 | 6.22  |
| 7 | -6 | -1  | 238.58 | 5.86  |
| 7 | -6 | 0   | 133.65 | 4.88  |
| 7 | -6 | 0   | 143.02 | 4.28  |
| 7 | -6 | 0   | 143.92 | 4.42  |
| 7 | -6 | 0   | 142.45 | 4.22  |
| 7 | -6 | 0   | 143.73 | 4.56  |
| 7 | -6 | 0   | 155.55 | 4.41  |
| 7 | -6 | 0   | 130.06 | 4.62  |
| 7 | -6 | 0   | 156.31 | 4.84  |
| 7 | -6 | 1   | 740.33 | 11.20 |
| 7 | -6 | 1   | 794.41 | 11.42 |
| 7 | -6 | 1   | 833.64 | 12.29 |
| 7 | -6 | 1   | 751.88 | 11.27 |
| 7 | -6 | 1   | 897.03 | 13.19 |
| 7 | -6 | 1   | 838.41 | 12.82 |
| 7 | -6 | 1   | 800.65 | 13.19 |
| 7 | -6 | 2   | 45.24  | 2.40  |
| 7 | -6 | 2   | 50.47  | 2.69  |
| 7 | -6 | 2   | 48.61  | 2.49  |
| 7 | -6 | 2   | 53.09  | 3.00  |
| 7 | -6 | 2   | 49.02  | 2.87  |
| 7 | -6 | 3   | 945.26 | 13.06 |
| 7 | -6 | 3   | 932.25 | 14.33 |
| 7 | -6 | 4   | 138.34 | 4.18  |
| 7 | -6 | 4   | 145.55 | 5.03  |
| 7 | -6 | 5   | 99.55  | 4.06  |
| 7 | -6 | 5   | 90.67  | 3.35  |
| 7 | -6 | 5   | 101.46 | 4.13  |
| 7 | -6 | 6   | 151.02 | 4.91  |
| 7 | -6 | 6   | 137.05 | 4.01  |
| 7 | -6 | 6   | 144.10 | 4.85  |
| 7 | -6 | 7   | 175.14 | 5.09  |
| 7 | -6 | 8   | 20.59  | 1.57  |
| 7 | -5 | -13 | 10.41  | 0.95  |
| 7 | -5 | -13 | 8.86   | 0.86  |
| 7 | -5 | -12 | 352.40 | 7.44  |

## CIF 31

|   |    |     |        |       |
|---|----|-----|--------|-------|
| 7 | -5 | -11 | 110.56 | 4.40  |
| 7 | -5 | -11 | 111.19 | 4.37  |
| 7 | -5 | -11 | 99.62  | 4.01  |
| 7 | -5 | -11 | 108.88 | 3.78  |
| 7 | -5 | -10 | 221.10 | 6.01  |
| 7 | -5 | -10 | 248.93 | 6.23  |
| 7 | -5 | -10 | 256.49 | 7.12  |
| 7 | -5 | -10 | 224.77 | 6.53  |
| 7 | -5 | -10 | 256.19 | 5.29  |
| 7 | -5 | -10 | 239.91 | 6.37  |
| 7 | -5 | -9  | 22.93  | 2.11  |
| 7 | -5 | -9  | 24.77  | 2.21  |
| 7 | -5 | -9  | 27.05  | 2.50  |
| 7 | -5 | -9  | 22.69  | 2.07  |
| 7 | -5 | -9  | 29.95  | 2.40  |
| 7 | -5 | -9  | 25.46  | 2.29  |
| 7 | -5 | -9  | 25.94  | 1.72  |
| 7 | -5 | -9  | 28.28  | 2.01  |
| 7 | -5 | -9  | 24.66  | 2.33  |
| 7 | -5 | -9  | 34.29  | 2.57  |
| 7 | -5 | -8  | 111.38 | 4.53  |
| 7 | -5 | -8  | 135.11 | 4.92  |
| 7 | -5 | -8  | 129.86 | 4.86  |
| 7 | -5 | -8  | 119.02 | 4.16  |
| 7 | -5 | -8  | 135.34 | 5.31  |
| 7 | -5 | -8  | 114.72 | 4.43  |
| 7 | -5 | -8  | 111.55 | 4.35  |
| 7 | -5 | -8  | 125.04 | 4.99  |
| 7 | -5 | -8  | 118.17 | 4.76  |
| 7 | -5 | -8  | 135.32 | 5.12  |
| 7 | -5 | -7  | 690.41 | 12.02 |
| 7 | -5 | -7  | 732.47 | 12.46 |
| 7 | -5 | -7  | 706.32 | 11.43 |
| 7 | -5 | -7  | 739.12 | 12.46 |
| 7 | -5 | -7  | 677.53 | 11.49 |
| 7 | -5 | -7  | 660.09 | 11.63 |
| 7 | -5 | -7  | 701.10 | 11.81 |
| 7 | -5 | -7  | 713.53 | 12.53 |
| 7 | -5 | -7  | 725.07 | 12.38 |
| 7 | -5 | -7  | 690.46 | 12.22 |
| 7 | -5 | -7  | 680.45 | 11.13 |

## CIF 31

|   |    |    |         |       |
|---|----|----|---------|-------|
| 7 | -5 | -7 | 663.98  | 11.89 |
| 7 | -5 | -6 | 1737.84 | 21.95 |
| 7 | -5 | -6 | 1879.81 | 22.78 |
| 7 | -5 | -6 | 1897.89 | 22.73 |
| 7 | -5 | -6 | 1711.95 | 21.35 |
| 7 | -5 | -6 | 1700.95 | 22.09 |
| 7 | -5 | -6 | 1741.35 | 22.04 |
| 7 | -5 | -6 | 1750.57 | 21.08 |
| 7 | -5 | -6 | 1798.83 | 21.95 |
| 7 | -5 | -6 | 1730.70 | 20.98 |
| 7 | -5 | -6 | 1788.60 | 22.54 |
| 7 | -5 | -6 | 1710.51 | 22.06 |
| 7 | -5 | -6 | 1805.09 | 21.57 |
| 7 | -5 | -6 | 1916.82 | 22.27 |
| 7 | -5 | -5 | 813.31  | 12.94 |
| 7 | -5 | -5 | 783.63  | 13.12 |
| 7 | -5 | -5 | 843.16  | 13.15 |
| 7 | -5 | -5 | 790.33  | 12.72 |
| 7 | -5 | -5 | 845.10  | 12.16 |
| 7 | -5 | -5 | 823.27  | 12.96 |
| 7 | -5 | -5 | 833.59  | 12.02 |
| 7 | -5 | -5 | 839.64  | 12.91 |
| 7 | -5 | -5 | 726.72  | 12.41 |
| 7 | -5 | -5 | 756.33  | 12.73 |
| 7 | -5 | -5 | 729.68  | 12.40 |
| 7 | -5 | -5 | 741.89  | 12.34 |
| 7 | -5 | -4 | 111.38  | 4.38  |
| 7 | -5 | -4 | 130.55  | 4.69  |
| 7 | -5 | -4 | 112.21  | 4.29  |
| 7 | -5 | -4 | 104.17  | 3.73  |
| 7 | -5 | -4 | 109.44  | 4.26  |
| 7 | -5 | -4 | 103.18  | 3.62  |
| 7 | -5 | -4 | 113.63  | 4.16  |
| 7 | -5 | -4 | 115.67  | 4.42  |
| 7 | -5 | -4 | 107.14  | 4.41  |
| 7 | -5 | -4 | 103.52  | 3.36  |
| 7 | -5 | -4 | 120.97  | 4.24  |
| 7 | -5 | -3 | 495.15  | 9.52  |
| 7 | -5 | -3 | 447.03  | 7.91  |
| 7 | -5 | -3 | 536.07  | 9.54  |
| 7 | -5 | -3 | 486.85  | 8.45  |

## CIF 31

|   |    |    |        |       |
|---|----|----|--------|-------|
| 7 | -5 | -3 | 432.99 | 7.82  |
| 7 | -5 | -3 | 522.95 | 9.98  |
| 7 | -5 | -3 | 502.36 | 8.36  |
| 7 | -5 | -3 | 489.78 | 8.96  |
| 7 | -5 | -2 | 755.00 | 12.07 |
| 7 | -5 | -2 | 639.13 | 9.86  |
| 7 | -5 | -2 | 763.61 | 11.64 |
| 7 | -5 | -2 | 719.11 | 10.66 |
| 7 | -5 | -2 | 704.37 | 10.72 |
| 7 | -5 | -2 | 680.74 | 10.02 |
| 7 | -5 | -2 | 776.17 | 11.64 |
| 7 | -5 | -2 | 723.70 | 10.84 |
| 7 | -5 | -2 | 738.68 | 11.24 |
| 7 | -5 | -1 | 505.47 | 9.76  |
| 7 | -5 | -1 | 495.45 | 8.02  |
| 7 | -5 | -1 | 522.10 | 9.16  |
| 7 | -5 | -1 | 473.52 | 8.34  |
| 7 | -5 | -1 | 489.72 | 8.46  |
| 7 | -5 | -1 | 477.17 | 7.86  |
| 7 | -5 | -1 | 500.07 | 9.05  |
| 7 | -5 | -1 | 516.76 | 9.67  |
| 7 | -5 | 0  | 7.13   | 1.21  |
| 7 | -5 | 0  | 7.07   | 1.00  |
| 7 | -5 | 0  | 5.77   | 1.06  |
| 7 | -5 | 0  | 6.97   | 0.98  |
| 7 | -5 | 0  | 5.60   | 1.14  |
| 7 | -5 | 0  | 6.24   | 1.30  |
| 7 | -5 | 0  | 8.41   | 1.27  |
| 7 | -5 | 1  | 482.20 | 8.46  |
| 7 | -5 | 1  | 487.25 | 7.84  |
| 7 | -5 | 1  | 511.78 | 8.67  |
| 7 | -5 | 1  | 475.39 | 7.70  |
| 7 | -5 | 1  | 500.96 | 9.09  |
| 7 | -5 | 2  | 0.46   | 0.97  |
| 7 | -5 | 2  | 0.90   | 0.69  |
| 7 | -5 | 2  | 0.98   | 0.64  |
| 7 | -5 | 2  | 0.67   | 0.86  |
| 7 | -5 | 3  | 64.92  | 3.12  |
| 7 | -5 | 3  | 69.53  | 3.33  |
| 7 | -5 | 4  | 107.19 | 4.16  |
| 7 | -5 | 5  | 296.96 | 7.11  |

## CIF 31

|   |    |     |        |      |
|---|----|-----|--------|------|
| 7 | -5 | 6   | 375.13 | 7.88 |
| 7 | -5 | 6   | 357.61 | 7.80 |
| 7 | -5 | 7   | 2.13   | 0.76 |
| 7 | -4 | -14 | 54.91  | 2.15 |
| 7 | -4 | -14 | 57.61  | 1.59 |
| 7 | -4 | -13 | 92.86  | 2.70 |
| 7 | -4 | -13 | 86.18  | 3.52 |
| 7 | -4 | -12 | 182.00 | 4.95 |
| 7 | -4 | -12 | 176.05 | 5.32 |
| 7 | -4 | -12 | 186.17 | 3.92 |
| 7 | -4 | -11 | 38.75  | 2.58 |
| 7 | -4 | -11 | 46.88  | 2.81 |
| 7 | -4 | -11 | 45.26  | 3.11 |
| 7 | -4 | -11 | 33.38  | 2.57 |
| 7 | -4 | -11 | 42.75  | 2.85 |
| 7 | -4 | -11 | 37.90  | 1.96 |
| 7 | -4 | -11 | 40.42  | 2.59 |
| 7 | -4 | -10 | 28.10  | 2.36 |
| 7 | -4 | -10 | 28.04  | 2.37 |
| 7 | -4 | -10 | 28.66  | 2.09 |
| 7 | -4 | -10 | 30.25  | 2.72 |
| 7 | -4 | -10 | 24.28  | 2.35 |
| 7 | -4 | -10 | 28.29  | 2.49 |
| 7 | -4 | -10 | 27.40  | 1.74 |
| 7 | -4 | -10 | 27.65  | 2.34 |
| 7 | -4 | -9  | 74.28  | 3.74 |
| 7 | -4 | -9  | 72.22  | 3.82 |
| 7 | -4 | -9  | 76.52  | 3.70 |
| 7 | -4 | -9  | 69.34  | 3.33 |
| 7 | -4 | -9  | 78.15  | 4.12 |
| 7 | -4 | -9  | 70.61  | 3.77 |
| 7 | -4 | -9  | 75.30  | 3.90 |
| 7 | -4 | -9  | 68.42  | 3.55 |
| 7 | -4 | -9  | 79.48  | 3.95 |
| 7 | -4 | -8  | 36.44  | 2.68 |
| 7 | -4 | -8  | 38.70  | 2.83 |
| 7 | -4 | -8  | 40.91  | 2.76 |
| 7 | -4 | -8  | 36.16  | 2.47 |
| 7 | -4 | -8  | 36.41  | 2.88 |
| 7 | -4 | -8  | 32.11  | 2.30 |
| 7 | -4 | -8  | 35.19  | 2.68 |

## CIF 31

|   |    |    |        |       |
|---|----|----|--------|-------|
| 7 | -4 | -8 | 33.78  | 2.66  |
| 7 | -4 | -8 | 31.96  | 2.33  |
| 7 | -4 | -8 | 38.88  | 2.69  |
| 7 | -4 | -8 | 41.64  | 2.90  |
| 7 | -4 | -7 | 24.64  | 2.20  |
| 7 | -4 | -7 | 22.84  | 2.16  |
| 7 | -4 | -7 | 24.26  | 2.20  |
| 7 | -4 | -7 | 23.62  | 1.92  |
| 7 | -4 | -7 | 23.11  | 2.11  |
| 7 | -4 | -7 | 17.89  | 1.70  |
| 7 | -4 | -7 | 26.19  | 2.33  |
| 7 | -4 | -7 | 26.14  | 2.13  |
| 7 | -4 | -7 | 21.13  | 2.14  |
| 7 | -4 | -7 | 20.29  | 2.12  |
| 7 | -4 | -7 | 19.99  | 1.98  |
| 7 | -4 | -7 | 23.97  | 2.14  |
| 7 | -4 | -7 | 22.83  | 2.20  |
| 7 | -4 | -6 | 819.21 | 13.17 |
| 7 | -4 | -6 | 910.87 | 14.18 |
| 7 | -4 | -6 | 877.81 | 13.53 |
| 7 | -4 | -6 | 787.46 | 12.99 |
| 7 | -4 | -6 | 866.68 | 12.14 |
| 7 | -4 | -6 | 843.35 | 13.29 |
| 7 | -4 | -6 | 808.63 | 11.85 |
| 7 | -4 | -6 | 902.32 | 13.43 |
| 7 | -4 | -6 | 862.12 | 13.47 |
| 7 | -4 | -6 | 666.06 | 12.56 |
| 7 | -4 | -6 | 760.83 | 12.99 |
| 7 | -4 | -6 | 854.75 | 12.82 |
| 7 | -4 | -5 | 424.96 | 8.69  |
| 7 | -4 | -5 | 348.16 | 8.80  |
| 7 | -4 | -5 | 456.54 | 8.92  |
| 7 | -4 | -5 | 411.23 | 8.59  |
| 7 | -4 | -5 | 430.09 | 8.58  |
| 7 | -4 | -5 | 404.21 | 7.41  |
| 7 | -4 | -5 | 441.68 | 8.88  |
| 7 | -4 | -5 | 436.13 | 7.59  |
| 7 | -4 | -5 | 428.68 | 8.42  |
| 7 | -4 | -5 | 404.64 | 8.91  |
| 7 | -4 | -5 | 390.94 | 8.84  |
| 7 | -4 | -5 | 433.11 | 8.33  |

## CIF 31

|   |    |    |         |       |
|---|----|----|---------|-------|
| 7 | -4 | -4 | 213.89  | 5.95  |
| 7 | -4 | -4 | 214.46  | 5.86  |
| 7 | -4 | -4 | 209.49  | 5.66  |
| 7 | -4 | -4 | 203.73  | 5.88  |
| 7 | -4 | -4 | 208.22  | 4.77  |
| 7 | -4 | -4 | 217.53  | 5.55  |
| 7 | -4 | -4 | 210.39  | 6.14  |
| 7 | -4 | -4 | 213.19  | 4.82  |
| 7 | -4 | -4 | 214.04  | 5.46  |
| 7 | -4 | -3 | 2103.23 | 23.91 |
| 7 | -4 | -3 | 2004.48 | 21.68 |
| 7 | -4 | -3 | 2136.79 | 23.13 |
| 7 | -4 | -3 | 2055.65 | 23.74 |
| 7 | -4 | -3 | 2150.02 | 24.95 |
| 7 | -4 | -3 | 2099.94 | 22.10 |
| 7 | -4 | -3 | 2048.58 | 22.73 |
| 7 | -4 | -2 | 530.79  | 9.53  |
| 7 | -4 | -2 | 569.77  | 8.52  |
| 7 | -4 | -2 | 552.05  | 8.60  |
| 7 | -4 | -2 | 535.67  | 9.02  |
| 7 | -4 | -2 | 530.47  | 9.62  |
| 7 | -4 | -2 | 502.68  | 8.78  |
| 7 | -4 | -1 | 24.73   | 2.11  |
| 7 | -4 | -1 | 24.14   | 1.93  |
| 7 | -4 | -1 | 22.01   | 1.54  |
| 7 | -4 | -1 | 23.51   | 1.63  |
| 7 | -4 | -1 | 21.30   | 1.70  |
| 7 | -4 | -1 | 23.95   | 2.03  |
| 7 | -4 | 0  | 129.68  | 4.14  |
| 7 | -4 | 0  | 116.24  | 3.51  |
| 7 | -4 | 0  | 111.81  | 3.73  |
| 7 | -4 | 0  | 107.30  | 4.06  |
| 7 | -4 | 0  | 127.10  | 4.53  |
| 7 | -4 | 1  | 109.85  | 3.76  |
| 7 | -4 | 1  | 101.33  | 3.30  |
| 7 | -4 | 1  | 98.08   | 3.50  |
| 7 | -4 | 1  | 110.19  | 4.32  |
| 7 | -4 | 2  | 60.45   | 2.77  |
| 7 | -4 | 2  | 62.74   | 2.63  |
| 7 | -4 | 2  | 68.64   | 2.96  |
| 7 | -4 | 2  | 65.16   | 3.37  |

## CIF 31

|   |    |     |        |       |
|---|----|-----|--------|-------|
| 7 | -4 | 3   | 14.28  | 1.37  |
| 7 | -4 | 3   | 10.37  | 1.32  |
| 7 | -4 | 3   | 12.56  | 1.51  |
| 7 | -4 | 4   | 381.64 | 7.48  |
| 7 | -4 | 4   | 421.06 | 8.45  |
| 7 | -4 | 5   | -0.18  | 0.72  |
| 7 | -4 | 6   | 287.72 | 6.65  |
| 7 | -4 | 6   | 265.82 | 6.45  |
| 7 | -4 | 7   | 2.78   | 0.85  |
| 7 | -3 | -14 | 14.43  | 0.95  |
| 7 | -3 | -14 | 14.11  | 1.43  |
| 7 | -3 | -13 | 16.47  | 1.53  |
| 7 | -3 | -13 | 17.69  | 1.89  |
| 7 | -3 | -12 | 12.72  | 1.65  |
| 7 | -3 | -12 | 13.83  | 1.90  |
| 7 | -3 | -12 | 13.71  | 1.70  |
| 7 | -3 | -12 | 13.75  | 1.14  |
| 7 | -3 | -11 | -0.27  | 0.94  |
| 7 | -3 | -11 | 0.05   | 1.05  |
| 7 | -3 | -11 | 0.88   | 0.97  |
| 7 | -3 | -11 | 1.78   | 1.04  |
| 7 | -3 | -10 | 379.43 | 8.92  |
| 7 | -3 | -10 | 385.99 | 9.12  |
| 7 | -3 | -10 | 366.15 | 8.11  |
| 7 | -3 | -10 | 339.67 | 8.59  |
| 7 | -3 | -10 | 341.15 | 8.77  |
| 7 | -3 | -10 | 358.73 | 7.99  |
| 7 | -3 | -10 | 372.08 | 8.58  |
| 7 | -3 | -9  | 250.24 | 7.03  |
| 7 | -3 | -9  | 250.98 | 7.25  |
| 7 | -3 | -9  | 252.94 | 6.67  |
| 7 | -3 | -9  | 234.56 | 6.57  |
| 7 | -3 | -9  | 230.36 | 6.87  |
| 7 | -3 | -9  | 222.98 | 6.87  |
| 7 | -3 | -9  | 229.06 | 6.41  |
| 7 | -3 | -9  | 238.64 | 6.93  |
| 7 | -3 | -8  | 702.31 | 12.66 |
| 7 | -3 | -8  | 735.24 | 12.31 |
| 7 | -3 | -8  | 739.67 | 12.52 |
| 7 | -3 | -8  | 728.30 | 12.65 |
| 7 | -3 | -8  | 729.98 | 12.37 |



## CIF 31

|   |    |    |        |       |
|---|----|----|--------|-------|
| 7 | -3 | -8 | 704.66 | 11.95 |
| 7 | -3 | -8 | 705.78 | 12.68 |
| 7 | -3 | -7 | 16.77  | 1.89  |
| 7 | -3 | -7 | 14.22  | 3.44  |
| 7 | -3 | -7 | 20.35  | 2.21  |
| 7 | -3 | -7 | 21.27  | 2.04  |
| 7 | -3 | -7 | 17.15  | 2.07  |
| 7 | -3 | -7 | 18.19  | 1.86  |
| 7 | -3 | -7 | 17.68  | 1.94  |
| 7 | -3 | -7 | 21.59  | 2.88  |
| 7 | -3 | -7 | 17.38  | 1.85  |
| 7 | -3 | -7 | 19.42  | 2.13  |
| 7 | -3 | -7 | 17.09  | 2.02  |
| 7 | -3 | -7 | 18.95  | 1.79  |
| 7 | -3 | -6 | 19.16  | 1.96  |
| 7 | -3 | -6 | 23.65  | 1.81  |
| 7 | -3 | -6 | 16.88  | 4.20  |
| 7 | -3 | -6 | 23.68  | 2.10  |
| 7 | -3 | -6 | 20.35  | 2.63  |
| 7 | -3 | -6 | 24.02  | 2.41  |
| 7 | -3 | -6 | 20.32  | 1.91  |
| 7 | -3 | -6 | 21.13  | 1.91  |
| 7 | -3 | -6 | 21.75  | 2.07  |
| 7 | -3 | -6 | 15.19  | 4.02  |
| 7 | -3 | -6 | 20.06  | 1.85  |
| 7 | -3 | -6 | 19.60  | 2.74  |
| 7 | -3 | -6 | 21.12  | 1.99  |
| 7 | -3 | -6 | 25.12  | 2.75  |
| 7 | -3 | -6 | 23.43  | 1.91  |
| 7 | -3 | -6 | 21.05  | 1.99  |
| 7 | -3 | -5 | 351.73 | 6.59  |
| 7 | -3 | -5 | 300.59 | 8.28  |
| 7 | -3 | -5 | 369.57 | 7.83  |
| 7 | -3 | -5 | 340.77 | 7.45  |
| 7 | -3 | -5 | 352.36 | 7.43  |
| 7 | -3 | -5 | 362.13 | 8.00  |
| 7 | -3 | -5 | 351.29 | 7.27  |
| 7 | -3 | -5 | 329.25 | 8.04  |
| 7 | -3 | -5 | 340.28 | 7.63  |
| 7 | -3 | -5 | 319.51 | 7.90  |
| 7 | -3 | -5 | 320.94 | 6.76  |

## CIF 31

|   |    |    |         |       |
|---|----|----|---------|-------|
| 7 | -3 | -5 | 359.40  | 7.79  |
| 7 | -3 | -4 | 86.50   | 2.93  |
| 7 | -3 | -4 | 111.04  | 4.73  |
| 7 | -3 | -4 | 94.37   | 3.75  |
| 7 | -3 | -4 | 89.57   | 3.53  |
| 7 | -3 | -4 | 97.40   | 3.96  |
| 7 | -3 | -4 | 87.75   | 3.31  |
| 7 | -3 | -4 | 92.26   | 3.73  |
| 7 | -3 | -4 | 81.90   | 3.87  |
| 7 | -3 | -4 | 96.56   | 3.42  |
| 7 | -3 | -4 | 98.00   | 3.81  |
| 7 | -3 | -3 | 210.05  | 5.78  |
| 7 | -3 | -3 | 193.64  | 4.22  |
| 7 | -3 | -3 | 190.57  | 5.30  |
| 7 | -3 | -3 | 209.30  | 5.34  |
| 7 | -3 | -3 | 214.88  | 5.05  |
| 7 | -3 | -3 | 206.02  | 5.52  |
| 7 | -3 | -3 | 220.25  | 6.22  |
| 7 | -3 | -3 | 190.07  | 4.72  |
| 7 | -3 | -3 | 206.94  | 5.43  |
| 7 | -3 | -2 | 803.41  | 12.41 |
| 7 | -3 | -2 | 795.54  | 11.03 |
| 7 | -3 | -2 | 823.89  | 12.18 |
| 7 | -3 | -2 | 802.54  | 11.04 |
| 7 | -3 | -2 | 819.64  | 11.65 |
| 7 | -3 | -1 | 1118.95 | 14.78 |
| 7 | -3 | -1 | 1109.50 | 14.77 |
| 7 | -3 | 0  | 1454.38 | 18.33 |
| 7 | -3 | 0  | 1490.08 | 17.85 |
| 7 | -3 | 0  | 1450.18 | 17.75 |
| 7 | -3 | 1  | 20.77   | 1.77  |
| 7 | -3 | 1  | 21.79   | 1.54  |
| 7 | -3 | 1  | 23.08   | 1.84  |
| 7 | -3 | 1  | 22.42   | 1.95  |
| 7 | -3 | 2  | 1097.37 | 14.54 |
| 7 | -3 | 2  | 1119.82 | 15.50 |
| 7 | -3 | 3  | 111.64  | 3.79  |
| 7 | -3 | 3  | 125.55  | 4.47  |
| 7 | -3 | 4  | 1667.51 | 19.88 |
| 7 | -3 | 4  | 1473.82 | 19.28 |
| 7 | -3 | 5  | 0.13    | 0.77  |

## CIF 31

|   |    |     |        |       |
|---|----|-----|--------|-------|
| 7 | -3 | 5   | 1.37   | 0.80  |
| 7 | -3 | 6   | 166.44 | 4.84  |
| 7 | -2 | -14 | 35.92  | 2.01  |
| 7 | -2 | -14 | 40.01  | 1.50  |
| 7 | -2 | -13 | 190.12 | 5.60  |
| 7 | -2 | -13 | 210.88 | 5.68  |
| 7 | -2 | -12 | 11.94  | 1.81  |
| 7 | -2 | -12 | 11.83  | 1.72  |
| 7 | -2 | -11 | 127.16 | 5.10  |
| 7 | -2 | -11 | 146.07 | 5.55  |
| 7 | -2 | -11 | 141.09 | 5.52  |
| 7 | -2 | -11 | 125.89 | 4.71  |
| 7 | -2 | -10 | 249.09 | 7.24  |
| 7 | -2 | -10 | 238.18 | 7.25  |
| 7 | -2 | -10 | 243.98 | 6.18  |
| 7 | -2 | -10 | 247.50 | 6.80  |
| 7 | -2 | -10 | 250.37 | 7.37  |
| 7 | -2 | -10 | 239.02 | 6.74  |
| 7 | -2 | -10 | 238.36 | 6.89  |
| 7 | -2 | -9  | 8.24   | 1.54  |
| 7 | -2 | -9  | 15.93  | 2.14  |
| 7 | -2 | -9  | 7.81   | 1.37  |
| 7 | -2 | -9  | 8.04   | 1.39  |
| 7 | -2 | -9  | 7.77   | 1.50  |
| 7 | -2 | -9  | 12.57  | 1.86  |
| 7 | -2 | -9  | 9.35   | 1.57  |
| 7 | -2 | -9  | 13.77  | 1.94  |
| 7 | -2 | -9  | 11.00  | 1.77  |
| 7 | -2 | -9  | 11.98  | 1.84  |
| 7 | -2 | -8  | 850.47 | 13.17 |
| 7 | -2 | -8  | 903.03 | 13.92 |
| 7 | -2 | -8  | 937.66 | 14.03 |
| 7 | -2 | -8  | 921.81 | 14.46 |
| 7 | -2 | -8  | 916.11 | 14.89 |
| 7 | -2 | -8  | 958.38 | 14.01 |
| 7 | -2 | -8  | 907.96 | 14.03 |
| 7 | -2 | -8  | 867.14 | 14.38 |
| 7 | -2 | -8  | 894.55 | 14.95 |
| 7 | -2 | -8  | 891.23 | 14.56 |
| 7 | -2 | -8  | 913.96 | 13.49 |
| 7 | -2 | -8  | 975.51 | 15.13 |

## CIF 31

|   |    |    |        |      |
|---|----|----|--------|------|
| 7 | -2 | -7 | 10.42  | 1.43 |
| 7 | -2 | -7 | 14.64  | 3.03 |
| 7 | -2 | -7 | 23.71  | 2.29 |
| 7 | -2 | -7 | 12.53  | 1.65 |
| 7 | -2 | -7 | 12.34  | 1.82 |
| 7 | -2 | -7 | 12.68  | 1.79 |
| 7 | -2 | -7 | 15.55  | 3.39 |
| 7 | -2 | -7 | 17.20  | 1.77 |
| 7 | -2 | -7 | 15.01  | 2.22 |
| 7 | -2 | -7 | 17.64  | 4.43 |
| 7 | -2 | -7 | 15.01  | 1.82 |
| 7 | -2 | -7 | 19.39  | 2.26 |
| 7 | -2 | -7 | 15.85  | 1.83 |
| 7 | -2 | -7 | 14.66  | 1.54 |
| 7 | -2 | -6 | 35.24  | 2.51 |
| 7 | -2 | -6 | 37.87  | 2.31 |
| 7 | -2 | -6 | 31.64  | 4.58 |
| 7 | -2 | -6 | 41.97  | 2.62 |
| 7 | -2 | -6 | 42.37  | 3.06 |
| 7 | -2 | -6 | 36.39  | 2.39 |
| 7 | -2 | -6 | 40.90  | 2.51 |
| 7 | -2 | -6 | 23.72  | 4.14 |
| 7 | -2 | -6 | 37.20  | 2.31 |
| 7 | -2 | -6 | 35.52  | 3.13 |
| 7 | -2 | -6 | 28.90  | 2.27 |
| 7 | -2 | -6 | 37.45  | 3.03 |
| 7 | -2 | -6 | 33.40  | 2.31 |
| 7 | -2 | -6 | 32.82  | 2.06 |
| 7 | -2 | -6 | 39.90  | 2.62 |
| 7 | -2 | -5 | 108.44 | 4.15 |
| 7 | -2 | -5 | 116.08 | 3.72 |
| 7 | -2 | -5 | 79.08  | 4.66 |
| 7 | -2 | -5 | 84.26  | 3.99 |
| 7 | -2 | -5 | 115.68 | 4.22 |
| 7 | -2 | -5 | 108.79 | 3.96 |
| 7 | -2 | -5 | 115.41 | 3.95 |
| 7 | -2 | -5 | 106.19 | 3.63 |
| 7 | -2 | -5 | 100.85 | 4.54 |
| 7 | -2 | -5 | 99.00  | 3.89 |
| 7 | -2 | -5 | 103.36 | 4.44 |
| 7 | -2 | -5 | 102.45 | 3.43 |

## CIF 31

|   |    |    |         |       |
|---|----|----|---------|-------|
| 7 | -2 | -5 | 105.82  | 4.08  |
| 7 | -2 | -4 | 325.71  | 7.12  |
| 7 | -2 | -4 | 324.95  | 8.39  |
| 7 | -2 | -4 | 285.83  | 5.85  |
| 7 | -2 | -4 | 324.15  | 7.06  |
| 7 | -2 | -4 | 286.47  | 6.48  |
| 7 | -2 | -4 | 313.35  | 6.54  |
| 7 | -2 | -4 | 315.54  | 7.17  |
| 7 | -2 | -4 | 283.07  | 5.83  |
| 7 | -2 | -4 | 265.75  | 6.32  |
| 7 | -2 | -4 | 266.34  | 7.15  |
| 7 | -2 | -4 | 260.56  | 5.47  |
| 7 | -2 | -4 | 306.65  | 6.82  |
| 7 | -2 | -3 | 8.57    | 1.31  |
| 7 | -2 | -3 | 12.39   | 1.93  |
| 7 | -2 | -3 | 8.26    | 1.04  |
| 7 | -2 | -3 | 9.69    | 1.29  |
| 7 | -2 | -3 | 8.93    | 1.17  |
| 7 | -2 | -3 | 10.27   | 1.08  |
| 7 | -2 | -3 | 10.05   | 1.31  |
| 7 | -2 | -3 | 9.37    | 1.24  |
| 7 | -2 | -2 | 1065.98 | 14.77 |
| 7 | -2 | -2 | 1113.50 | 12.97 |
| 7 | -2 | -2 | 1179.71 | 15.29 |
| 7 | -2 | -2 | 1119.39 | 13.94 |
| 7 | -2 | -2 | 1038.31 | 14.12 |
| 7 | -2 | -2 | 1180.50 | 16.22 |
| 7 | -2 | -2 | 1070.75 | 13.99 |
| 7 | -2 | -1 | 36.90   | 2.28  |
| 7 | -2 | -1 | 31.14   | 2.23  |
| 7 | -2 | -1 | 36.93   | 2.13  |
| 7 | -2 | 0  | 9.80    | 1.32  |
| 7 | -2 | 0  | 8.33    | 1.33  |
| 7 | -2 | 0  | 6.68    | 1.04  |
| 7 | -2 | 1  | 1000.50 | 13.98 |
| 7 | -2 | 1  | 969.35  | 13.24 |
| 7 | -2 | 2  | 2084.29 | 23.31 |
| 7 | -2 | 2  | 2209.85 | 23.59 |
| 7 | -2 | 3  | 356.25  | 7.38  |
| 7 | -2 | 3  | 364.02  | 7.45  |
| 7 | -2 | 4  | 1136.38 | 14.79 |

## CIF 31

|   |    |     |         |       |
|---|----|-----|---------|-------|
| 7 | -2 | 5   | 361.13  | 7.59  |
| 7 | -1 | -15 | 113.34  | 3.29  |
| 7 | -1 | -14 | 30.08   | 2.09  |
| 7 | -1 | -14 | 28.92   | 2.21  |
| 7 | -1 | -13 | 16.64   | 1.94  |
| 7 | -1 | -13 | 16.46   | 1.84  |
| 7 | -1 | -13 | 17.23   | 1.94  |
| 7 | -1 | -12 | 12.62   | 1.89  |
| 7 | -1 | -12 | 13.09   | 1.92  |
| 7 | -1 | -12 | 11.16   | 1.69  |
| 7 | -1 | -12 | 10.88   | 1.56  |
| 7 | -1 | -11 | 47.11   | 3.18  |
| 7 | -1 | -11 | 50.68   | 3.50  |
| 7 | -1 | -11 | 49.00   | 3.07  |
| 7 | -1 | -11 | 49.23   | 3.30  |
| 7 | -1 | -11 | 50.30   | 3.30  |
| 7 | -1 | -11 | 41.28   | 2.90  |
| 7 | -1 | -10 | 52.98   | 3.08  |
| 7 | -1 | -10 | 55.47   | 3.63  |
| 7 | -1 | -10 | 59.86   | 3.50  |
| 7 | -1 | -10 | 52.28   | 3.44  |
| 7 | -1 | -10 | 50.88   | 3.33  |
| 7 | -1 | -10 | 48.55   | 3.21  |
| 7 | -1 | -9  | 138.90  | 4.88  |
| 7 | -1 | -9  | 132.13  | 4.52  |
| 7 | -1 | -9  | 139.76  | 5.52  |
| 7 | -1 | -9  | 132.58  | 4.55  |
| 7 | -1 | -9  | 142.17  | 5.23  |
| 7 | -1 | -9  | 141.77  | 5.02  |
| 7 | -1 | -9  | 141.66  | 5.33  |
| 7 | -1 | -9  | 126.37  | 4.66  |
| 7 | -1 | -9  | 132.68  | 5.18  |
| 7 | -1 | -9  | 132.92  | 5.19  |
| 7 | -1 | -9  | 140.62  | 5.28  |
| 7 | -1 | -8  | 1074.43 | 16.41 |
| 7 | -1 | -8  | 1086.20 | 15.55 |
| 7 | -1 | -8  | 1158.55 | 16.23 |
| 7 | -1 | -8  | 1129.34 | 16.55 |
| 7 | -1 | -8  | 1142.93 | 15.65 |
| 7 | -1 | -8  | 1189.62 | 16.94 |
| 7 | -1 | -8  | 1175.91 | 16.21 |

## CIF 31

|   |    |    |         |       |
|---|----|----|---------|-------|
| 7 | -1 | -8 | 1160.62 | 16.69 |
| 7 | -1 | -8 | 1214.49 | 16.96 |
| 7 | -1 | -8 | 976.29  | 14.96 |
| 7 | -1 | -8 | 1147.39 | 16.57 |
| 7 | -1 | -8 | 1131.32 | 16.93 |
| 7 | -1 | -8 | 1062.33 | 14.93 |
| 7 | -1 | -7 | 552.51  | 10.40 |
| 7 | -1 | -7 | 548.25  | 9.80  |
| 7 | -1 | -7 | 561.23  | 11.13 |
| 7 | -1 | -7 | 492.37  | 10.85 |
| 7 | -1 | -7 | 609.66  | 10.29 |
| 7 | -1 | -7 | 570.12  | 10.75 |
| 7 | -1 | -7 | 556.10  | 10.83 |
| 7 | -1 | -7 | 572.19  | 10.54 |
| 7 | -1 | -7 | 627.91  | 12.08 |
| 7 | -1 | -7 | 514.13  | 9.33  |
| 7 | -1 | -7 | 619.77  | 11.46 |
| 7 | -1 | -7 | 510.47  | 9.46  |
| 7 | -1 | -7 | 502.74  | 9.97  |
| 7 | -1 | -7 | 541.65  | 10.75 |
| 7 | -1 | -7 | 528.13  | 9.88  |
| 7 | -1 | -7 | 472.62  | 8.51  |
| 7 | -1 | -7 | 553.88  | 10.61 |
| 7 | -1 | -6 | 1506.63 | 19.19 |
| 7 | -1 | -6 | 1515.52 | 18.40 |
| 7 | -1 | -6 | 1259.90 | 20.10 |
| 7 | -1 | -6 | 1600.99 | 20.21 |
| 7 | -1 | -6 | 1540.53 | 19.05 |
| 7 | -1 | -6 | 1518.79 | 19.44 |
| 7 | -1 | -6 | 1234.54 | 20.25 |
| 7 | -1 | -6 | 1430.39 | 17.47 |
| 7 | -1 | -6 | 1632.72 | 20.94 |
| 7 | -1 | -6 | 1572.23 | 17.46 |
| 7 | -1 | -6 | 1520.98 | 18.84 |
| 7 | -1 | -6 | 1499.23 | 20.36 |
| 7 | -1 | -6 | 1443.69 | 19.28 |
| 7 | -1 | -6 | 1542.70 | 19.60 |
| 7 | -1 | -5 | 602.98  | 10.26 |
| 7 | -1 | -5 | 584.83  | 9.56  |
| 7 | -1 | -5 | 631.64  | 11.09 |
| 7 | -1 | -5 | 610.95  | 10.35 |

## CIF 31

|   |    |    |         |       |
|---|----|----|---------|-------|
| 7 | -1 | -5 | 565.19  | 9.44  |
| 7 | -1 | -5 | 602.80  | 9.63  |
| 7 | -1 | -5 | 585.53  | 10.44 |
| 7 | -1 | -5 | 548.66  | 11.07 |
| 7 | -1 | -5 | 582.71  | 8.86  |
| 7 | -1 | -5 | 569.89  | 8.63  |
| 7 | -1 | -5 | 637.13  | 10.14 |
| 7 | -1 | -5 | 583.99  | 10.31 |
| 7 | -1 | -4 | 1078.27 | 14.48 |
| 7 | -1 | -4 | 932.12  | 16.82 |
| 7 | -1 | -4 | 1028.41 | 13.50 |
| 7 | -1 | -4 | 1092.25 | 14.69 |
| 7 | -1 | -4 | 1004.58 | 13.32 |
| 7 | -1 | -4 | 1057.98 | 13.31 |
| 7 | -1 | -4 | 1053.65 | 14.55 |
| 7 | -1 | -4 | 1018.06 | 12.17 |
| 7 | -1 | -4 | 937.55  | 13.40 |
| 7 | -1 | -4 | 897.11  | 14.71 |
| 7 | -1 | -4 | 1057.46 | 14.41 |
| 7 | -1 | -3 | 229.43  | 5.63  |
| 7 | -1 | -3 | 245.32  | 7.51  |
| 7 | -1 | -3 | 216.54  | 5.04  |
| 7 | -1 | -3 | 241.70  | 6.00  |
| 7 | -1 | -3 | 209.36  | 4.99  |
| 7 | -1 | -3 | 215.85  | 4.92  |
| 7 | -1 | -3 | 229.72  | 5.85  |
| 7 | -1 | -3 | 215.31  | 5.19  |
| 7 | -1 | -3 | 199.26  | 6.02  |
| 7 | -1 | -3 | 221.94  | 5.53  |
| 7 | -1 | -2 | 858.23  | 12.55 |
| 7 | -1 | -2 | 888.10  | 11.75 |
| 7 | -1 | -2 | 885.39  | 12.00 |
| 7 | -1 | -2 | 911.53  | 14.11 |
| 7 | -1 | -1 | 67.51   | 2.95  |
| 7 | -1 | -1 | 63.41   | 2.54  |
| 7 | -1 | -1 | 71.42   | 3.27  |
| 7 | -1 | -1 | 67.09   | 2.68  |
| 7 | -1 | -1 | 72.07   | 3.56  |
| 7 | -1 | 0  | 237.04  | 5.57  |
| 7 | -1 | 0  | 231.33  | 4.90  |
| 7 | -1 | 0  | 232.55  | 6.09  |



## CIF 31

|   |    |     |        |       |
|---|----|-----|--------|-------|
| 7 | -1 | 0   | 233.59 | 6.20  |
| 7 | -1 | 1   | 229.20 | 5.43  |
| 7 | -1 | 1   | 235.19 | 6.00  |
| 7 | -1 | 2   | 619.32 | 10.52 |
| 7 | -1 | 2   | 604.94 | 10.96 |
| 7 | -1 | 3   | 270.90 | 6.48  |
| 7 | -1 | 3   | 252.56 | 6.82  |
| 7 | -1 | 4   | 60.48  | 2.90  |
| 7 | -1 | 5   | 17.01  | 1.97  |
| 7 | 0  | -15 | 68.59  | 2.54  |
| 7 | 0  | -14 | 0.63   | 0.96  |
| 7 | 0  | -14 | 0.91   | 0.73  |
| 7 | 0  | -14 | 0.45   | 0.91  |
| 7 | 0  | -13 | 35.77  | 2.70  |
| 7 | 0  | -13 | 35.49  | 2.66  |
| 7 | 0  | -13 | 33.67  | 2.61  |
| 7 | 0  | -13 | 29.54  | 2.24  |
| 7 | 0  | -12 | 16.29  | 2.12  |
| 7 | 0  | -12 | 19.21  | 1.99  |
| 7 | 0  | -12 | 19.96  | 2.42  |
| 7 | 0  | -12 | 18.16  | 2.10  |
| 7 | 0  | -12 | 15.55  | 1.91  |
| 7 | 0  | -11 | 151.25 | 5.58  |
| 7 | 0  | -11 | 155.38 | 5.59  |
| 7 | 0  | -11 | 150.12 | 5.60  |
| 7 | 0  | -11 | 154.38 | 5.69  |
| 7 | 0  | -11 | 157.16 | 5.77  |
| 7 | 0  | -10 | 541.18 | 11.00 |
| 7 | 0  | -10 | 568.61 | 10.53 |
| 7 | 0  | -10 | 525.26 | 9.88  |
| 7 | 0  | -10 | 561.10 | 10.79 |
| 7 | 0  | -10 | 549.18 | 10.98 |
| 7 | 0  | -10 | 540.42 | 9.94  |
| 7 | 0  | -10 | 534.41 | 10.77 |
| 7 | 0  | -10 | 528.37 | 10.93 |
| 7 | 0  | -10 | 508.98 | 11.04 |
| 7 | 0  | -9  | 246.70 | 7.05  |
| 7 | 0  | -9  | 277.66 | 7.09  |
| 7 | 0  | -9  | 258.57 | 6.87  |
| 7 | 0  | -9  | 263.41 | 7.20  |
| 7 | 0  | -9  | 247.69 | 6.12  |

## CIF 31

|   |   |    |        |      |
|---|---|----|--------|------|
| 7 | 0 | -9 | 269.82 | 7.37 |
| 7 | 0 | -9 | 265.28 | 6.96 |
| 7 | 0 | -9 | 231.64 | 6.75 |
| 7 | 0 | -9 | 235.41 | 6.88 |
| 7 | 0 | -9 | 261.58 | 7.42 |
| 7 | 0 | -9 | 268.45 | 7.69 |
| 7 | 0 | -9 | 236.50 | 6.22 |
| 7 | 0 | -8 | 62.25  | 3.46 |
| 7 | 0 | -8 | 62.86  | 3.32 |
| 7 | 0 | -8 | 65.14  | 3.63 |
| 7 | 0 | -8 | 67.69  | 3.92 |
| 7 | 0 | -8 | 69.54  | 3.86 |
| 7 | 0 | -8 | 62.07  | 3.12 |
| 7 | 0 | -8 | 65.19  | 4.02 |
| 7 | 0 | -8 | 63.40  | 3.36 |
| 7 | 0 | -8 | 67.58  | 3.77 |
| 7 | 0 | -8 | 67.33  | 3.47 |
| 7 | 0 | -8 | 63.11  | 3.62 |
| 7 | 0 | -8 | 66.92  | 3.36 |
| 7 | 0 | -7 | 4.32   | 2.83 |
| 7 | 0 | -7 | 5.09   | 3.91 |
| 7 | 0 | -7 | 3.25   | 1.22 |
| 7 | 0 | -7 | 5.25   | 1.18 |
| 7 | 0 | -7 | 4.50   | 1.26 |
| 7 | 0 | -7 | 3.33   | 1.19 |
| 7 | 0 | -7 | 2.41   | 0.96 |
| 7 | 0 | -7 | 3.95   | 2.59 |
| 7 | 0 | -7 | 3.36   | 1.39 |
| 7 | 0 | -7 | 2.02   | 1.93 |
| 7 | 0 | -7 | 3.15   | 0.99 |
| 7 | 0 | -7 | 4.36   | 1.07 |
| 7 | 0 | -7 | 2.59   | 1.46 |
| 7 | 0 | -6 | 19.02  | 1.80 |
| 7 | 0 | -6 | 14.70  | 1.67 |
| 7 | 0 | -6 | 14.01  | 3.98 |
| 7 | 0 | -6 | 18.67  | 1.92 |
| 7 | 0 | -6 | 16.16  | 1.74 |
| 7 | 0 | -6 | 22.96  | 2.16 |
| 7 | 0 | -6 | 13.97  | 1.51 |
| 7 | 0 | -6 | 19.66  | 1.95 |
| 7 | 0 | -6 | 16.94  | 3.86 |

## CIF 31

|   |   |    |         |       |
|---|---|----|---------|-------|
| 7 | 0 | -6 | 17.85   | 2.50  |
| 7 | 0 | -6 | 16.27   | 1.55  |
| 7 | 0 | -6 | 16.61   | 1.66  |
| 7 | 0 | -6 | 15.82   | 2.14  |
| 7 | 0 | -5 | 229.05  | 5.81  |
| 7 | 0 | -5 | 181.30  | 7.57  |
| 7 | 0 | -5 | 250.93  | 6.01  |
| 7 | 0 | -5 | 233.92  | 6.39  |
| 7 | 0 | -5 | 241.59  | 6.12  |
| 7 | 0 | -5 | 233.52  | 6.36  |
| 7 | 0 | -5 | 254.36  | 6.41  |
| 7 | 0 | -5 | 168.36  | 6.68  |
| 7 | 0 | -5 | 227.33  | 5.27  |
| 7 | 0 | -5 | 219.85  | 5.46  |
| 7 | 0 | -5 | 231.21  | 6.60  |
| 7 | 0 | -5 | 235.09  | 6.58  |
| 7 | 0 | -4 | 1127.01 | 14.97 |
| 7 | 0 | -4 | 1259.27 | 15.51 |
| 7 | 0 | -4 | 1252.65 | 16.18 |
| 7 | 0 | -4 | 1204.94 | 16.17 |
| 7 | 0 | -4 | 1201.64 | 15.88 |
| 7 | 0 | -4 | 1070.96 | 16.98 |
| 7 | 0 | -4 | 1144.27 | 14.40 |
| 7 | 0 | -4 | 1147.75 | 14.19 |
| 7 | 0 | -4 | 1235.11 | 17.05 |
| 7 | 0 | -3 | 234.86  | 5.59  |
| 7 | 0 | -3 | 256.89  | 5.83  |
| 7 | 0 | -3 | 246.29  | 6.18  |
| 7 | 0 | -3 | 231.99  | 6.02  |
| 7 | 0 | -3 | 224.02  | 5.78  |
| 7 | 0 | -3 | 227.73  | 6.85  |
| 7 | 0 | -3 | 225.28  | 5.00  |
| 7 | 0 | -3 | 236.28  | 5.05  |
| 7 | 0 | -3 | 227.87  | 6.35  |
| 7 | 0 | -2 | 229.12  | 5.32  |
| 7 | 0 | -2 | 207.83  | 7.19  |
| 7 | 0 | -2 | 242.05  | 5.56  |
| 7 | 0 | -2 | 239.50  | 6.21  |
| 7 | 0 | -2 | 249.39  | 5.90  |
| 7 | 0 | -2 | 210.53  | 6.14  |
| 7 | 0 | -1 | 967.46  | 12.75 |

## CIF 31

|   |   |     |         |       |
|---|---|-----|---------|-------|
| 7 | 0 | -1  | 1037.01 | 13.42 |
| 7 | 0 | -1  | 988.60  | 13.51 |
| 7 | 0 | -1  | 944.68  | 14.66 |
| 7 | 0 | -1  | 1011.55 | 14.64 |
| 7 | 0 | 0   | 1941.32 | 21.16 |
| 7 | 0 | 0   | 2051.45 | 23.34 |
| 7 | 0 | 0   | 1818.72 | 21.17 |
| 7 | 0 | 0   | 1689.96 | 22.35 |
| 7 | 0 | 0   | 2030.78 | 23.60 |
| 7 | 0 | 1   | 125.35  | 3.81  |
| 7 | 0 | 1   | 119.37  | 4.48  |
| 7 | 0 | 1   | 111.33  | 4.24  |
| 7 | 0 | 2   | 2.17    | 1.19  |
| 7 | 0 | 2   | 1.89    | 0.95  |
| 7 | 0 | 2   | 1.18    | 0.77  |
| 7 | 0 | 2   | 1.78    | 1.02  |
| 7 | 0 | 3   | 7.33    | 1.55  |
| 7 | 0 | 3   | 5.20    | 1.21  |
| 7 | 0 | 4   | 30.90   | 2.19  |
| 7 | 1 | -15 | 37.80   | 1.96  |
| 7 | 1 | -14 | 91.25   | 3.77  |
| 7 | 1 | -14 | 86.35   | 3.30  |
| 7 | 1 | -14 | 90.21   | 3.42  |
| 7 | 1 | -13 | 155.85  | 4.82  |
| 7 | 1 | -13 | 158.61  | 5.43  |
| 7 | 1 | -13 | 158.44  | 5.19  |
| 7 | 1 | -13 | 150.47  | 5.04  |
| 7 | 1 | -12 | 2.17    | 1.12  |
| 7 | 1 | -12 | 2.22    | 1.41  |
| 7 | 1 | -12 | 0.05    | 0.96  |
| 7 | 1 | -12 | 0.46    | 0.96  |
| 7 | 1 | -11 | 31.77   | 2.87  |
| 7 | 1 | -11 | 31.85   | 3.14  |
| 7 | 1 | -11 | 29.54   | 2.28  |
| 7 | 1 | -11 | 28.73   | 2.46  |
| 7 | 1 | -11 | 31.08   | 2.69  |
| 7 | 1 | -10 | 97.46   | 4.43  |
| 7 | 1 | -10 | 107.51  | 4.42  |
| 7 | 1 | -10 | 115.70  | 4.82  |
| 7 | 1 | -10 | 112.63  | 5.03  |
| 7 | 1 | -10 | 112.08  | 4.50  |

## CIF 31

|   |   |     |        |      |
|---|---|-----|--------|------|
| 7 | 1 | -10 | 104.92 | 4.45 |
| 7 | 1 | -10 | 90.91  | 4.26 |
| 7 | 1 | -10 | 112.97 | 4.97 |
| 7 | 1 | -10 | 107.01 | 4.12 |
| 7 | 1 | -9  | 0.78   | 0.97 |
| 7 | 1 | -9  | 0.44   | 0.92 |
| 7 | 1 | -9  | 0.10   | 1.00 |
| 7 | 1 | -9  | 3.61   | 1.45 |
| 7 | 1 | -9  | 0.44   | 1.12 |
| 7 | 1 | -9  | -0.81  | 1.26 |
| 7 | 1 | -9  | 0.96   | 1.17 |
| 7 | 1 | -9  | 1.18   | 0.97 |
| 7 | 1 | -9  | 2.14   | 1.01 |
| 7 | 1 | -9  | -0.20  | 0.81 |
| 7 | 1 | -8  | -0.26  | 0.78 |
| 7 | 1 | -8  | 0.12   | 1.12 |
| 7 | 1 | -8  | 0.64   | 1.41 |
| 7 | 1 | -8  | 0.65   | 1.18 |
| 7 | 1 | -8  | 0.79   | 0.85 |
| 7 | 1 | -8  | 1.89   | 1.16 |
| 7 | 1 | -8  | 4.72   | 2.28 |
| 7 | 1 | -8  | 0.82   | 0.80 |
| 7 | 1 | -8  | 3.37   | 1.55 |
| 7 | 1 | -8  | 1.03   | 1.16 |
| 7 | 1 | -8  | 0.39   | 0.81 |
| 7 | 1 | -8  | 0.91   | 0.94 |
| 7 | 1 | -8  | 0.79   | 1.01 |
| 7 | 1 | -7  | 114.57 | 4.36 |
| 7 | 1 | -7  | 114.29 | 4.40 |
| 7 | 1 | -7  | 120.20 | 5.30 |
| 7 | 1 | -7  | 133.76 | 5.72 |
| 7 | 1 | -7  | 112.41 | 4.70 |
| 7 | 1 | -7  | 116.49 | 4.24 |
| 7 | 1 | -7  | 117.92 | 4.72 |
| 7 | 1 | -7  | 96.86  | 6.61 |
| 7 | 1 | -7  | 128.98 | 5.54 |
| 7 | 1 | -7  | 106.06 | 4.80 |
| 7 | 1 | -7  | 114.99 | 4.16 |
| 7 | 1 | -7  | 110.56 | 4.13 |
| 7 | 1 | -7  | 121.42 | 4.97 |
| 7 | 1 | -7  | 112.79 | 4.70 |

## CIF 31

|   |   |    |        |       |
|---|---|----|--------|-------|
| 7 | 1 | -6 | 229.37 | 6.01  |
| 7 | 1 | -6 | 254.57 | 8.07  |
| 7 | 1 | -6 | 264.80 | 6.66  |
| 7 | 1 | -6 | 251.65 | 6.81  |
| 7 | 1 | -6 | 258.68 | 6.41  |
| 7 | 1 | -6 | 254.39 | 6.79  |
| 7 | 1 | -6 | 278.31 | 8.53  |
| 7 | 1 | -6 | 249.33 | 7.22  |
| 7 | 1 | -6 | 232.03 | 7.22  |
| 7 | 1 | -6 | 249.28 | 6.10  |
| 7 | 1 | -6 | 230.08 | 5.70  |
| 7 | 1 | -6 | 246.98 | 7.02  |
| 7 | 1 | -6 | 245.70 | 7.13  |
| 7 | 1 | -5 | 566.15 | 9.68  |
| 7 | 1 | -5 | 524.45 | 12.51 |
| 7 | 1 | -5 | 581.62 | 10.26 |
| 7 | 1 | -5 | 632.53 | 10.66 |
| 7 | 1 | -5 | 628.41 | 10.92 |
| 7 | 1 | -5 | 646.29 | 12.06 |
| 7 | 1 | -5 | 563.57 | 9.62  |
| 7 | 1 | -5 | 596.57 | 11.16 |
| 7 | 1 | -5 | 599.21 | 10.65 |
| 7 | 1 | -5 | 557.14 | 11.19 |
| 7 | 1 | -4 | 243.04 | 5.61  |
| 7 | 1 | -4 | 246.46 | 6.21  |
| 7 | 1 | -4 | 259.03 | 6.41  |
| 7 | 1 | -4 | 264.06 | 6.58  |
| 7 | 1 | -4 | 248.87 | 6.13  |
| 7 | 1 | -4 | 270.16 | 6.53  |
| 7 | 1 | -4 | 246.99 | 6.96  |
| 7 | 1 | -4 | 243.24 | 5.72  |
| 7 | 1 | -4 | 270.73 | 6.99  |
| 7 | 1 | -4 | 255.41 | 7.33  |
| 7 | 1 | -3 | 104.92 | 3.92  |
| 7 | 1 | -3 | 87.51  | 3.53  |
| 7 | 1 | -3 | 105.89 | 4.13  |
| 7 | 1 | -3 | 92.24  | 4.16  |
| 7 | 1 | -3 | 94.91  | 3.77  |
| 7 | 1 | -3 | 103.70 | 3.69  |
| 7 | 1 | -3 | 101.38 | 4.46  |
| 7 | 1 | -3 | 104.74 | 3.55  |

## CIF 31

|   |   |     |        |       |
|---|---|-----|--------|-------|
| 7 | 1 | -3  | 97.73  | 4.05  |
| 7 | 1 | -2  | 10.12  | 2.00  |
| 7 | 1 | -2  | 16.03  | 1.70  |
| 7 | 1 | -2  | 15.40  | 1.79  |
| 7 | 1 | -2  | 14.10  | 1.39  |
| 7 | 1 | -2  | 11.64  | 1.70  |
| 7 | 1 | -2  | 13.05  | 1.36  |
| 7 | 1 | -2  | 13.90  | 1.64  |
| 7 | 1 | -2  | 14.79  | 1.69  |
| 7 | 1 | -1  | 304.92 | 9.49  |
| 7 | 1 | -1  | 405.04 | 7.82  |
| 7 | 1 | -1  | 359.53 | 8.52  |
| 7 | 1 | -1  | 354.17 | 7.77  |
| 7 | 1 | -1  | 404.64 | 7.17  |
| 7 | 1 | -1  | 440.99 | 8.88  |
| 7 | 1 | 0   | 254.08 | 6.01  |
| 7 | 1 | 0   | 243.29 | 6.38  |
| 7 | 1 | 0   | 235.50 | 6.53  |
| 7 | 1 | 0   | 230.75 | 5.92  |
| 7 | 1 | 0   | 260.51 | 6.74  |
| 7 | 1 | 1   | 354.35 | 10.04 |
| 7 | 1 | 1   | 481.94 | 8.42  |
| 7 | 1 | 1   | 507.96 | 9.70  |
| 7 | 1 | 1   | 402.97 | 8.67  |
| 7 | 1 | 1   | 478.15 | 9.60  |
| 7 | 1 | 2   | 114.58 | 3.79  |
| 7 | 1 | 2   | 127.41 | 4.58  |
| 7 | 1 | 3   | 609.93 | 10.43 |
| 7 | 1 | 3   | 498.09 | 9.55  |
| 7 | 1 | 4   | 84.01  | 3.51  |
| 7 | 2 | -14 | 63.71  | 3.05  |
| 7 | 2 | -14 | 68.97  | 2.75  |
| 7 | 2 | -14 | 60.49  | 2.74  |
| 7 | 2 | -13 | 0.93   | 1.11  |
| 7 | 2 | -13 | 0.96   | 0.94  |
| 7 | 2 | -13 | 0.83   | 1.05  |
| 7 | 2 | -13 | 0.70   | 0.77  |
| 7 | 2 | -13 | 1.04   | 0.90  |
| 7 | 2 | -12 | 155.12 | 5.62  |
| 7 | 2 | -12 | 160.45 | 5.60  |
| 7 | 2 | -12 | 152.22 | 5.91  |

## CIF 31

|   |   |     |        |      |
|---|---|-----|--------|------|
| 7 | 2 | -12 | 145.30 | 4.63 |
| 7 | 2 | -11 | 342.22 | 7.73 |
| 7 | 2 | -11 | 323.43 | 7.62 |
| 7 | 2 | -11 | 323.54 | 8.37 |
| 7 | 2 | -11 | 348.08 | 9.60 |
| 7 | 2 | -11 | 320.78 | 7.64 |
| 7 | 2 | -11 | 277.22 | 6.92 |
| 7 | 2 | -11 | 290.59 | 8.05 |
| 7 | 2 | -10 | 48.99  | 3.11 |
| 7 | 2 | -10 | 55.37  | 3.53 |
| 7 | 2 | -10 | 56.51  | 4.13 |
| 7 | 2 | -10 | 48.76  | 3.19 |
| 7 | 2 | -10 | 45.49  | 3.12 |
| 7 | 2 | -10 | 53.29  | 3.33 |
| 7 | 2 | -10 | 51.43  | 3.01 |
| 7 | 2 | -9  | 190.03 | 5.87 |
| 7 | 2 | -9  | 205.17 | 6.44 |
| 7 | 2 | -9  | 210.99 | 6.63 |
| 7 | 2 | -9  | 197.72 | 6.21 |
| 7 | 2 | -9  | 210.12 | 6.62 |
| 7 | 2 | -9  | 201.38 | 6.63 |
| 7 | 2 | -9  | 196.29 | 5.83 |
| 7 | 2 | -9  | 201.01 | 5.92 |
| 7 | 2 | -9  | 209.71 | 6.89 |
| 7 | 2 | -9  | 203.16 | 6.25 |
| 7 | 2 | -8  | 41.51  | 2.68 |
| 7 | 2 | -8  | 42.60  | 2.87 |
| 7 | 2 | -8  | 46.04  | 3.18 |
| 7 | 2 | -8  | 38.47  | 3.17 |
| 7 | 2 | -8  | 48.23  | 3.19 |
| 7 | 2 | -8  | 56.63  | 4.09 |
| 7 | 2 | -8  | 46.57  | 3.05 |
| 7 | 2 | -8  | 49.64  | 3.50 |
| 7 | 2 | -8  | 47.72  | 3.02 |
| 7 | 2 | -8  | 42.07  | 2.64 |
| 7 | 2 | -8  | 39.93  | 2.67 |
| 7 | 2 | -8  | 48.16  | 3.24 |
| 7 | 2 | -8  | 44.65  | 3.10 |
| 7 | 2 | -7  | 177.85 | 5.36 |
| 7 | 2 | -7  | 209.42 | 6.05 |
| 7 | 2 | -7  | 205.91 | 6.80 |



## CIF 31

|   |   |    |        |       |
|---|---|----|--------|-------|
| 7 | 2 | -7 | 181.64 | 5.90  |
| 7 | 2 | -7 | 193.29 | 5.36  |
| 7 | 2 | -7 | 203.47 | 7.37  |
| 7 | 2 | -7 | 208.44 | 6.22  |
| 7 | 2 | -7 | 210.09 | 7.75  |
| 7 | 2 | -7 | 216.46 | 6.99  |
| 7 | 2 | -7 | 192.10 | 6.38  |
| 7 | 2 | -7 | 196.59 | 5.70  |
| 7 | 2 | -7 | 186.92 | 6.25  |
| 7 | 2 | -7 | 197.26 | 6.42  |
| 7 | 2 | -6 | 7.24   | 1.14  |
| 7 | 2 | -6 | 7.35   | 1.43  |
| 7 | 2 | -6 | 9.77   | 2.83  |
| 7 | 2 | -6 | 8.54   | 3.38  |
| 7 | 2 | -6 | 5.53   | 1.22  |
| 7 | 2 | -6 | 8.94   | 1.37  |
| 7 | 2 | -6 | 6.06   | 1.70  |
| 7 | 2 | -6 | 7.17   | 1.38  |
| 7 | 2 | -6 | 4.20   | 2.60  |
| 7 | 2 | -6 | 8.74   | 1.45  |
| 7 | 2 | -6 | 6.79   | 1.46  |
| 7 | 2 | -6 | 6.30   | 1.75  |
| 7 | 2 | -5 | 3.44   | 3.39  |
| 7 | 2 | -5 | 6.03   | 1.16  |
| 7 | 2 | -5 | 6.62   | 1.33  |
| 7 | 2 | -5 | 13.74  | 1.98  |
| 7 | 2 | -5 | 5.99   | 1.27  |
| 7 | 2 | -5 | 5.69   | 1.36  |
| 7 | 2 | -5 | 4.70   | 2.90  |
| 7 | 2 | -5 | 5.85   | 1.45  |
| 7 | 2 | -5 | 3.10   | 2.48  |
| 7 | 2 | -5 | 6.11   | 1.21  |
| 7 | 2 | -5 | 5.24   | 1.31  |
| 7 | 2 | -5 | 6.20   | 1.81  |
| 7 | 2 | -4 | 434.80 | 11.25 |
| 7 | 2 | -4 | 459.60 | 9.22  |
| 7 | 2 | -4 | 497.73 | 9.29  |
| 7 | 2 | -4 | 425.29 | 9.97  |
| 7 | 2 | -4 | 440.85 | 8.61  |
| 7 | 2 | -4 | 450.69 | 10.74 |
| 7 | 2 | -4 | 489.38 | 9.97  |

## CIF 31

|   |   |    |        |      |
|---|---|----|--------|------|
| 7 | 2 | -4 | 470.86 | 8.74 |
| 7 | 2 | -4 | 456.77 | 9.21 |
| 7 | 2 | -3 | 341.65 | 9.79 |
| 7 | 2 | -3 | 397.80 | 8.34 |
| 7 | 2 | -3 | 422.00 | 8.54 |
| 7 | 2 | -3 | 388.10 | 7.65 |
| 7 | 2 | -3 | 341.04 | 9.14 |
| 7 | 2 | -3 | 436.38 | 9.17 |
| 7 | 2 | -3 | 378.39 | 7.71 |
| 7 | 2 | -3 | 399.25 | 8.27 |
| 7 | 2 | -3 | 410.57 | 9.47 |
| 7 | 2 | -2 | 241.92 | 8.00 |
| 7 | 2 | -2 | 295.70 | 6.92 |
| 7 | 2 | -2 | 313.70 | 7.44 |
| 7 | 2 | -2 | 248.62 | 7.79 |
| 7 | 2 | -2 | 313.83 | 7.47 |
| 7 | 2 | -2 | 292.27 | 6.50 |
| 7 | 2 | -2 | 290.80 | 6.71 |
| 7 | 2 | -2 | 309.17 | 8.12 |
| 7 | 2 | -2 | 313.91 | 7.34 |
| 7 | 2 | -1 | 33.37  | 3.14 |
| 7 | 2 | -1 | 38.69  | 2.49 |
| 7 | 2 | -1 | 37.84  | 2.59 |
| 7 | 2 | -1 | 30.50  | 2.77 |
| 7 | 2 | -1 | 41.46  | 2.60 |
| 7 | 2 | -1 | 35.68  | 2.20 |
| 7 | 2 | -1 | 37.74  | 2.89 |
| 7 | 2 | -1 | 36.80  | 2.60 |
| 7 | 2 | 0  | 16.50  | 2.29 |
| 7 | 2 | 0  | 15.81  | 1.67 |
| 7 | 2 | 0  | 12.30  | 1.88 |
| 7 | 2 | 0  | 18.12  | 2.07 |
| 7 | 2 | 1  | 35.68  | 3.05 |
| 7 | 2 | 1  | 47.82  | 2.65 |
| 7 | 2 | 1  | 47.52  | 2.90 |
| 7 | 2 | 1  | 34.47  | 2.63 |
| 7 | 2 | 1  | 44.49  | 2.80 |
| 7 | 2 | 2  | 1.08   | 0.86 |
| 7 | 2 | 2  | 1.22   | 0.98 |
| 7 | 2 | 2  | 3.03   | 0.96 |
| 7 | 2 | 3  | 100.99 | 3.91 |

## CIF 31

|   |   |     |        |       |
|---|---|-----|--------|-------|
| 7 | 2 | 3   | 83.21  | 3.65  |
| 7 | 3 | -14 | 0.62   | 0.74  |
| 7 | 3 | -14 | 1.04   | 0.75  |
| 7 | 3 | -13 | 59.46  | 3.03  |
| 7 | 3 | -13 | 62.62  | 3.08  |
| 7 | 3 | -13 | 58.52  | 3.25  |
| 7 | 3 | -13 | 55.29  | 2.37  |
| 7 | 3 | -13 | 57.43  | 2.99  |
| 7 | 3 | -12 | 136.43 | 4.93  |
| 7 | 3 | -12 | 147.78 | 5.25  |
| 7 | 3 | -12 | 133.30 | 5.36  |
| 7 | 3 | -12 | 149.49 | 4.78  |
| 7 | 3 | -11 | 538.02 | 9.59  |
| 7 | 3 | -11 | 468.64 | 9.56  |
| 7 | 3 | -11 | 453.77 | 9.78  |
| 7 | 3 | -11 | 480.93 | 11.27 |
| 7 | 3 | -11 | 525.01 | 10.09 |
| 7 | 3 | -11 | 493.62 | 10.56 |
| 7 | 3 | -11 | 471.39 | 9.19  |
| 7 | 3 | -10 | 19.98  | 2.02  |
| 7 | 3 | -10 | 17.32  | 2.01  |
| 7 | 3 | -10 | 20.63  | 2.27  |
| 7 | 3 | -10 | 16.17  | 1.96  |
| 7 | 3 | -10 | 20.83  | 2.27  |
| 7 | 3 | -10 | 16.52  | 1.72  |
| 7 | 3 | -10 | 19.06  | 1.90  |
| 7 | 3 | -10 | 17.18  | 2.11  |
| 7 | 3 | -10 | 17.26  | 1.88  |
| 7 | 3 | -9  | 8.02   | 1.53  |
| 7 | 3 | -9  | 4.04   | 1.32  |
| 7 | 3 | -9  | 4.70   | 1.34  |
| 7 | 3 | -9  | 4.97   | 1.84  |
| 7 | 3 | -9  | 6.33   | 1.24  |
| 7 | 3 | -9  | 4.52   | 1.55  |
| 7 | 3 | -9  | 4.51   | 1.25  |
| 7 | 3 | -9  | 6.62   | 1.49  |
| 7 | 3 | -9  | 5.07   | 1.25  |
| 7 | 3 | -9  | 4.52   | 1.29  |
| 7 | 3 | -8  | -0.36  | 1.07  |
| 7 | 3 | -8  | 0.06   | 0.98  |
| 7 | 3 | -8  | 0.47   | 0.95  |

## CIF 31

|   |   |    |        |       |
|---|---|----|--------|-------|
| 7 | 3 | -8 | -0.32  | 1.40  |
| 7 | 3 | -8 | 0.54   | 1.04  |
| 7 | 3 | -8 | -0.20  | 1.03  |
| 7 | 3 | -8 | 0.06   | 1.39  |
| 7 | 3 | -8 | 0.06   | 1.34  |
| 7 | 3 | -8 | 0.05   | 0.86  |
| 7 | 3 | -8 | -0.06  | 1.01  |
| 7 | 3 | -8 | 0.65   | 1.06  |
| 7 | 3 | -8 | 0.69   | 0.98  |
| 7 | 3 | -8 | 0.30   | 1.12  |
| 7 | 3 | -7 | 1.37   | 1.30  |
| 7 | 3 | -7 | 3.47   | 1.51  |
| 7 | 3 | -7 | 1.78   | 0.95  |
| 7 | 3 | -7 | 0.77   | 1.46  |
| 7 | 3 | -7 | 1.54   | 0.95  |
| 7 | 3 | -7 | 2.47   | 2.11  |
| 7 | 3 | -7 | 2.57   | 1.31  |
| 7 | 3 | -7 | 2.45   | 1.38  |
| 7 | 3 | -7 | 2.71   | 1.15  |
| 7 | 3 | -7 | 4.04   | 1.19  |
| 7 | 3 | -7 | 1.97   | 1.31  |
| 7 | 3 | -6 | 137.27 | 5.85  |
| 7 | 3 | -6 | 173.76 | 5.51  |
| 7 | 3 | -6 | 162.39 | 5.90  |
| 7 | 3 | -6 | 148.16 | 4.76  |
| 7 | 3 | -6 | 140.03 | 6.16  |
| 7 | 3 | -6 | 149.35 | 4.88  |
| 7 | 3 | -6 | 178.46 | 6.26  |
| 7 | 3 | -6 | 149.08 | 5.60  |
| 7 | 3 | -6 | 172.04 | 6.40  |
| 7 | 3 | -6 | 162.03 | 5.20  |
| 7 | 3 | -6 | 146.95 | 5.30  |
| 7 | 3 | -6 | 155.10 | 5.76  |
| 7 | 3 | -5 | 459.27 | 10.30 |
| 7 | 3 | -5 | 434.15 | 9.04  |
| 7 | 3 | -5 | 433.17 | 9.62  |
| 7 | 3 | -5 | 467.31 | 8.90  |
| 7 | 3 | -5 | 353.51 | 9.53  |
| 7 | 3 | -5 | 403.95 | 8.02  |
| 7 | 3 | -5 | 345.48 | 10.35 |
| 7 | 3 | -5 | 456.43 | 10.34 |

## CIF 31

|   |   |    |         |       |
|---|---|----|---------|-------|
| 7 | 3 | -5 | 397.16  | 10.13 |
| 7 | 3 | -5 | 407.46  | 8.60  |
| 7 | 3 | -5 | 373.35  | 8.34  |
| 7 | 3 | -4 | 1058.18 | 17.11 |
| 7 | 3 | -4 | 991.08  | 14.65 |
| 7 | 3 | -4 | 1005.78 | 15.54 |
| 7 | 3 | -4 | 951.17  | 14.32 |
| 7 | 3 | -4 | 847.05  | 15.28 |
| 7 | 3 | -4 | 1080.46 | 16.68 |
| 7 | 3 | -4 | 913.09  | 16.12 |
| 7 | 3 | -4 | 971.38  | 14.12 |
| 7 | 3 | -4 | 912.93  | 13.78 |
| 7 | 3 | -4 | 966.34  | 15.95 |
| 7 | 3 | -3 | 158.97  | 6.14  |
| 7 | 3 | -3 | 162.11  | 5.23  |
| 7 | 3 | -3 | 136.41  | 5.51  |
| 7 | 3 | -3 | 179.93  | 5.46  |
| 7 | 3 | -3 | 180.33  | 6.16  |
| 7 | 3 | -3 | 177.94  | 5.23  |
| 7 | 3 | -3 | 147.62  | 5.58  |
| 7 | 3 | -2 | 478.52  | 10.57 |
| 7 | 3 | -2 | 509.12  | 9.59  |
| 7 | 3 | -2 | 500.89  | 9.73  |
| 7 | 3 | -2 | 517.56  | 10.48 |
| 7 | 3 | -2 | 466.69  | 10.68 |
| 7 | 3 | -2 | 497.09  | 9.12  |
| 7 | 3 | -2 | 478.33  | 10.20 |
| 7 | 3 | -1 | 171.90  | 5.87  |
| 7 | 3 | -1 | 189.70  | 5.54  |
| 7 | 3 | -1 | 131.80  | 4.73  |
| 7 | 3 | -1 | 191.89  | 5.80  |
| 7 | 3 | -1 | 191.99  | 5.83  |
| 7 | 3 | -1 | 148.26  | 5.83  |
| 7 | 3 | -1 | 181.07  | 5.12  |
| 7 | 3 | -1 | 153.35  | 5.44  |
| 7 | 3 | 0  | 193.62  | 5.94  |
| 7 | 3 | 0  | 185.43  | 6.38  |
| 7 | 3 | 0  | 192.67  | 5.84  |
| 7 | 3 | 1  | 125.15  | 4.25  |
| 7 | 3 | 1  | 114.68  | 4.66  |
| 7 | 3 | 2  | 71.41   | 3.04  |

## CIF 31

|   |   |     |        |      |
|---|---|-----|--------|------|
| 7 | 3 | 2   | 73.34  | 3.37 |
| 7 | 3 | 3   | 112.58 | 3.81 |
| 7 | 4 | -14 | 124.28 | 3.38 |
| 7 | 4 | -13 | 2.44   | 0.84 |
| 7 | 4 | -13 | 4.28   | 1.09 |
| 7 | 4 | -13 | 3.42   | 0.82 |
| 7 | 4 | -12 | 36.28  | 2.27 |
| 7 | 4 | -12 | 43.24  | 2.82 |
| 7 | 4 | -12 | 42.46  | 2.50 |
| 7 | 4 | -12 | 37.29  | 2.47 |
| 7 | 4 | -11 | 22.83  | 2.03 |
| 7 | 4 | -11 | 21.83  | 1.94 |
| 7 | 4 | -11 | 18.91  | 1.67 |
| 7 | 4 | -11 | 23.39  | 2.51 |
| 7 | 4 | -11 | 22.83  | 2.14 |
| 7 | 4 | -11 | 22.23  | 2.14 |
| 7 | 4 | -11 | 20.32  | 1.89 |
| 7 | 4 | -10 | 90.19  | 3.77 |
| 7 | 4 | -10 | 87.31  | 4.02 |
| 7 | 4 | -10 | 100.09 | 3.94 |
| 7 | 4 | -10 | 100.85 | 4.43 |
| 7 | 4 | -10 | 88.72  | 3.71 |
| 7 | 4 | -10 | 93.08  | 4.23 |
| 7 | 4 | -10 | 91.78  | 4.08 |
| 7 | 4 | -9  | 3.31   | 1.21 |
| 7 | 4 | -9  | 2.79   | 1.12 |
| 7 | 4 | -9  | 2.52   | 1.37 |
| 7 | 4 | -9  | 2.58   | 1.02 |
| 7 | 4 | -9  | 1.89   | 1.53 |
| 7 | 4 | -9  | 2.23   | 1.03 |
| 7 | 4 | -9  | 2.99   | 1.54 |
| 7 | 4 | -9  | 3.01   | 1.01 |
| 7 | 4 | -9  | 1.94   | 1.07 |
| 7 | 4 | -9  | 6.81   | 1.32 |
| 7 | 4 | -9  | 2.20   | 1.03 |
| 7 | 4 | -9  | 2.74   | 1.13 |
| 7 | 4 | -8  | 16.00  | 1.82 |
| 7 | 4 | -8  | 14.88  | 1.83 |
| 7 | 4 | -8  | 15.08  | 2.01 |
| 7 | 4 | -8  | 10.36  | 2.21 |
| 7 | 4 | -8  | 15.06  | 1.83 |

## CIF 31

|   |   |    |        |       |
|---|---|----|--------|-------|
| 7 | 4 | -8 | 13.97  | 2.14  |
| 7 | 4 | -8 | 14.68  | 1.95  |
| 7 | 4 | -8 | 16.68  | 1.88  |
| 7 | 4 | -8 | 17.46  | 1.87  |
| 7 | 4 | -8 | 12.86  | 1.71  |
| 7 | 4 | -8 | 14.58  | 1.98  |
| 7 | 4 | -7 | 408.31 | 9.05  |
| 7 | 4 | -7 | 379.52 | 9.32  |
| 7 | 4 | -7 | 389.95 | 8.88  |
| 7 | 4 | -7 | 377.65 | 10.10 |
| 7 | 4 | -7 | 392.71 | 9.50  |
| 7 | 4 | -7 | 411.99 | 9.21  |
| 7 | 4 | -7 | 396.79 | 8.59  |
| 7 | 4 | -7 | 365.61 | 8.39  |
| 7 | 4 | -7 | 393.44 | 9.37  |
| 7 | 4 | -6 | 52.76  | 3.33  |
| 7 | 4 | -6 | 51.66  | 3.26  |
| 7 | 4 | -6 | 39.15  | 3.28  |
| 7 | 4 | -6 | 46.68  | 3.43  |
| 7 | 4 | -6 | 49.68  | 3.50  |
| 7 | 4 | -6 | 56.38  | 3.52  |
| 7 | 4 | -6 | 59.04  | 3.20  |
| 7 | 4 | -6 | 43.36  | 2.68  |
| 7 | 4 | -5 | 18.79  | 2.07  |
| 7 | 4 | -5 | 23.05  | 2.17  |
| 7 | 4 | -5 | 18.87  | 2.02  |
| 7 | 4 | -5 | 18.37  | 1.77  |
| 7 | 4 | -5 | 17.95  | 2.76  |
| 7 | 4 | -5 | 15.65  | 2.37  |
| 7 | 4 | -5 | 15.25  | 2.20  |
| 7 | 4 | -5 | 20.31  | 2.01  |
| 7 | 4 | -5 | 19.85  | 2.25  |
| 7 | 4 | -4 | 41.15  | 2.90  |
| 7 | 4 | -4 | 47.75  | 2.92  |
| 7 | 4 | -4 | 44.40  | 2.81  |
| 7 | 4 | -4 | 38.87  | 2.54  |
| 7 | 4 | -4 | 45.63  | 4.17  |
| 7 | 4 | -4 | 40.13  | 3.23  |
| 7 | 4 | -4 | 44.52  | 2.76  |
| 7 | 4 | -4 | 39.65  | 2.98  |
| 7 | 4 | -3 | 736.60 | 12.96 |

## CIF 31

|   |   |     |        |       |
|---|---|-----|--------|-------|
| 7 | 4 | -3  | 803.04 | 12.83 |
| 7 | 4 | -3  | 776.78 | 12.21 |
| 7 | 4 | -3  | 770.54 | 12.45 |
| 7 | 4 | -3  | 788.57 | 13.87 |
| 7 | 4 | -3  | 822.86 | 13.23 |
| 7 | 4 | -3  | 829.84 | 14.71 |
| 7 | 4 | -3  | 786.78 | 12.35 |
| 7 | 4 | -3  | 765.47 | 13.36 |
| 7 | 4 | -2  | 100.02 | 4.15  |
| 7 | 4 | -2  | 107.50 | 4.22  |
| 7 | 4 | -2  | 110.29 | 4.30  |
| 7 | 4 | -2  | 112.45 | 5.27  |
| 7 | 4 | -2  | 115.81 | 5.07  |
| 7 | 4 | -2  | 106.30 | 4.01  |
| 7 | 4 | -2  | 109.39 | 4.44  |
| 7 | 4 | -1  | 799.55 | 12.32 |
| 7 | 4 | -1  | 783.77 | 12.47 |
| 7 | 4 | -1  | 765.10 | 13.65 |
| 7 | 4 | -1  | 764.02 | 13.42 |
| 7 | 4 | -1  | 788.64 | 11.81 |
| 7 | 4 | 0   | 56.05  | 2.89  |
| 7 | 4 | 0   | 50.25  | 2.82  |
| 7 | 4 | 0   | 56.37  | 3.36  |
| 7 | 4 | 0   | 53.41  | 3.12  |
| 7 | 4 | 1   | 65.28  | 3.36  |
| 7 | 4 | 1   | 61.66  | 2.97  |
| 7 | 4 | 2   | 176.61 | 4.75  |
| 7 | 4 | 3   | 11.70  | 1.20  |
| 7 | 5 | -13 | 18.96  | 1.30  |
| 7 | 5 | -12 | 2.40   | 1.08  |
| 7 | 5 | -12 | 3.30   | 0.96  |
| 7 | 5 | -11 | 40.59  | 2.63  |
| 7 | 5 | -11 | 33.79  | 2.07  |
| 7 | 5 | -11 | 40.94  | 2.54  |
| 7 | 5 | -11 | 33.34  | 2.17  |
| 7 | 5 | -11 | 39.07  | 2.36  |
| 7 | 5 | -10 | 43.12  | 2.81  |
| 7 | 5 | -10 | 45.39  | 2.88  |
| 7 | 5 | -10 | 43.22  | 2.51  |
| 7 | 5 | -10 | 42.67  | 2.53  |
| 7 | 5 | -10 | 43.96  | 2.75  |



## CIF 31

|   |   |    |        |      |
|---|---|----|--------|------|
| 7 | 5 | -9 | 212.72 | 5.20 |
| 7 | 5 | -9 | 214.91 | 5.55 |
| 7 | 5 | -9 | 206.96 | 5.87 |
| 7 | 5 | -9 | 215.54 | 5.50 |
| 7 | 5 | -9 | 206.91 | 6.22 |
| 7 | 5 | -8 | 94.25  | 3.81 |
| 7 | 5 | -8 | 91.10  | 3.77 |
| 7 | 5 | -8 | 87.23  | 4.05 |
| 7 | 5 | -8 | 96.31  | 3.95 |
| 7 | 5 | -8 | 86.11  | 4.00 |
| 7 | 5 | -8 | 90.99  | 3.85 |
| 7 | 5 | -8 | 83.95  | 4.02 |
| 7 | 5 | -7 | 1.37   | 1.09 |
| 7 | 5 | -7 | 1.18   | 0.93 |
| 7 | 5 | -7 | 3.67   | 1.23 |
| 7 | 5 | -7 | 0.90   | 0.97 |
| 7 | 5 | -7 | -0.51  | 1.10 |
| 7 | 5 | -7 | 1.04   | 0.94 |
| 7 | 5 | -7 | 0.28   | 1.25 |
| 7 | 5 | -7 | 0.10   | 0.90 |
| 7 | 5 | -7 | 0.73   | 1.06 |
| 7 | 5 | -7 | 0.81   | 0.91 |
| 7 | 5 | -6 | 1.21   | 1.59 |
| 7 | 5 | -6 | 1.38   | 0.96 |
| 7 | 5 | -6 | 0.22   | 0.94 |
| 7 | 5 | -6 | 0.97   | 1.27 |
| 7 | 5 | -6 | 0.64   | 1.04 |
| 7 | 5 | -6 | 1.00   | 1.19 |
| 7 | 5 | -6 | 1.56   | 1.23 |
| 7 | 5 | -6 | 1.23   | 1.26 |
| 7 | 5 | -6 | 0.36   | 0.87 |
| 7 | 5 | -6 | 0.95   | 1.03 |
| 7 | 5 | -5 | 12.79  | 1.67 |
| 7 | 5 | -5 | 14.87  | 1.60 |
| 7 | 5 | -5 | 13.16  | 1.89 |
| 7 | 5 | -5 | 20.00  | 2.22 |
| 7 | 5 | -5 | 16.76  | 1.77 |
| 7 | 5 | -5 | 14.14  | 1.87 |
| 7 | 5 | -5 | 13.91  | 1.73 |
| 7 | 5 | -4 | 95.21  | 3.95 |
| 7 | 5 | -4 | 119.58 | 4.38 |

## CIF 31

|   |   |     |        |      |
|---|---|-----|--------|------|
| 7 | 5 | -4  | 108.20 | 4.45 |
| 7 | 5 | -4  | 105.66 | 4.63 |
| 7 | 5 | -4  | 119.22 | 5.02 |
| 7 | 5 | -4  | 114.17 | 4.18 |
| 7 | 5 | -4  | 107.39 | 4.44 |
| 7 | 5 | -3  | 421.79 | 8.41 |
| 7 | 5 | -3  | 417.53 | 8.66 |
| 7 | 5 | -3  | 396.66 | 9.02 |
| 7 | 5 | -3  | 389.74 | 8.58 |
| 7 | 5 | -2  | 253.49 | 6.16 |
| 7 | 5 | -2  | 200.86 | 5.44 |
| 7 | 5 | -2  | 208.21 | 6.12 |
| 7 | 5 | -2  | 244.88 | 6.84 |
| 7 | 5 | -2  | 195.80 | 5.52 |
| 7 | 5 | -1  | 49.68  | 2.81 |
| 7 | 5 | -1  | 55.50  | 3.11 |
| 7 | 5 | 0   | 63.51  | 3.07 |
| 7 | 5 | 0   | 52.35  | 3.11 |
| 7 | 5 | 1   | 7.63   | 1.23 |
| 7 | 5 | 1   | 7.48   | 1.09 |
| 7 | 5 | 1   | 7.40   | 1.05 |
| 7 | 5 | 1   | 9.10   | 1.41 |
| 7 | 5 | 2   | 73.36  | 2.39 |
| 7 | 6 | -12 | 4.93   | 0.83 |
| 7 | 6 | -12 | 6.16   | 0.87 |
| 7 | 6 | -11 | 30.69  | 1.90 |
| 7 | 6 | -11 | 35.53  | 2.07 |
| 7 | 6 | -10 | 24.37  | 1.81 |
| 7 | 6 | -10 | 17.56  | 1.36 |
| 7 | 6 | -9  | 39.27  | 2.05 |
| 7 | 6 | -9  | 33.95  | 2.22 |
| 7 | 6 | -9  | 40.47  | 2.19 |
| 7 | 6 | -9  | 38.00  | 2.52 |
| 7 | 6 | -9  | 35.95  | 2.30 |
| 7 | 6 | -9  | 34.86  | 2.32 |
| 7 | 6 | -8  | 37.99  | 2.26 |
| 7 | 6 | -8  | 30.78  | 2.09 |
| 7 | 6 | -8  | 38.76  | 2.38 |
| 7 | 6 | -8  | 37.22  | 2.49 |
| 7 | 6 | -8  | 31.42  | 2.26 |
| 7 | 6 | -8  | 37.08  | 2.30 |

## CIF 31

|   |   |    |        |      |
|---|---|----|--------|------|
| 7 | 6 | -7 | 13.84  | 1.65 |
| 7 | 6 | -7 | 13.61  | 1.43 |
| 7 | 6 | -7 | 11.80  | 1.40 |
| 7 | 6 | -7 | 14.62  | 1.71 |
| 7 | 6 | -7 | 14.01  | 1.76 |
| 7 | 6 | -7 | 13.16  | 1.70 |
| 7 | 6 | -7 | 11.68  | 1.54 |
| 7 | 6 | -7 | 13.05  | 1.64 |
| 7 | 6 | -6 | 374.31 | 8.01 |
| 7 | 6 | -6 | 323.94 | 7.07 |
| 7 | 6 | -6 | 363.72 | 7.71 |
| 7 | 6 | -6 | 377.80 | 8.00 |
| 7 | 6 | -6 | 362.71 | 7.66 |
| 7 | 6 | -6 | 381.93 | 8.14 |
| 7 | 6 | -6 | 327.01 | 7.64 |
| 7 | 6 | -5 | 274.04 | 6.82 |
| 7 | 6 | -5 | 287.93 | 6.90 |
| 7 | 6 | -5 | 287.83 | 6.95 |
| 7 | 6 | -5 | 244.75 | 6.13 |
| 7 | 6 | -5 | 252.37 | 6.65 |
| 7 | 6 | -5 | 287.63 | 7.11 |
| 7 | 6 | -5 | 235.74 | 6.15 |
| 7 | 6 | -4 | 82.96  | 3.74 |
| 7 | 6 | -4 | 81.82  | 3.75 |
| 7 | 6 | -4 | 79.49  | 3.14 |
| 7 | 6 | -4 | 70.85  | 3.39 |
| 7 | 6 | -4 | 70.93  | 3.18 |
| 7 | 6 | -4 | 74.15  | 3.37 |
| 7 | 6 | -3 | 276.80 | 6.80 |
| 7 | 6 | -3 | 276.26 | 6.54 |
| 7 | 6 | -3 | 228.77 | 5.92 |
| 7 | 6 | -3 | 288.53 | 6.84 |
| 7 | 6 | -3 | 236.68 | 6.20 |
| 7 | 6 | -2 | 293.03 | 6.70 |
| 7 | 6 | -2 | 307.99 | 6.55 |
| 7 | 6 | -2 | 310.57 | 6.75 |
| 7 | 6 | -2 | 287.54 | 6.79 |
| 7 | 6 | -1 | -0.03  | 0.88 |
| 7 | 6 | -1 | 0.71   | 0.72 |
| 7 | 6 | -1 | 0.07   | 0.79 |
| 7 | 6 | -1 | 0.34   | 0.65 |

## CIF 31

|   |     |     |        |      |
|---|-----|-----|--------|------|
| 7 | 6   | -1  | 0.79   | 0.70 |
| 7 | 6   | 0   | 355.53 | 5.97 |
| 7 | 6   | 0   | 360.72 | 6.38 |
| 7 | 6   | 1   | 1.91   | 0.75 |
| 7 | 7   | -10 | 35.51  | 1.61 |
| 7 | 7   | -10 | 46.74  | 1.97 |
| 7 | 7   | -9  | 12.55  | 1.16 |
| 7 | 7   | -9  | 13.47  | 1.24 |
| 7 | 7   | -8  | 39.85  | 1.90 |
| 7 | 7   | -8  | 37.57  | 2.12 |
| 7 | 7   | -8  | 37.60  | 1.98 |
| 7 | 7   | -7  | 49.26  | 2.30 |
| 7 | 7   | -7  | 41.26  | 2.35 |
| 7 | 7   | -7  | 47.00  | 2.29 |
| 7 | 7   | -7  | 37.79  | 1.96 |
| 7 | 7   | -6  | 9.91   | 1.28 |
| 7 | 7   | -6  | 5.69   | 0.92 |
| 7 | 7   | -6  | 7.87   | 1.36 |
| 7 | 7   | -6  | 9.46   | 1.14 |
| 7 | 7   | -6  | 9.47   | 1.26 |
| 7 | 7   | -6  | 6.13   | 0.90 |
| 7 | 7   | -6  | 6.51   | 1.08 |
| 7 | 7   | -6  | 8.33   | 1.17 |
| 7 | 7   | -5  | 295.44 | 6.07 |
| 7 | 7   | -5  | 256.59 | 5.48 |
| 7 | 7   | -5  | 262.78 | 6.07 |
| 7 | 7   | -5  | 290.74 | 5.92 |
| 7 | 7   | -5  | 296.46 | 6.08 |
| 7 | 7   | -4  | 13.07  | 1.40 |
| 7 | 7   | -4  | 14.96  | 1.51 |
| 7 | 7   | -4  | 17.40  | 1.51 |
| 7 | 7   | -4  | 18.30  | 1.52 |
| 7 | 7   | -4  | 17.10  | 1.50 |
| 7 | 7   | -3  | 194.76 | 4.47 |
| 7 | 7   | -3  | 189.86 | 4.51 |
| 7 | 7   | -3  | 184.81 | 4.22 |
| 7 | 7   | -2  | 1.00   | 0.57 |
| 7 | 7   | -2  | 0.59   | 0.71 |
| 7 | 7   | -2  | 0.36   | 0.47 |
| 8 | -12 | -3  | 6.65   | 0.78 |
| 8 | -12 | -3  | 5.89   | 0.53 |

## CIF 31

|   |     |    |        |      |
|---|-----|----|--------|------|
| 8 | -12 | -2 | 230.64 | 4.49 |
| 8 | -12 | -2 | 203.80 | 3.83 |
| 8 | -12 | -1 | 2.33   | 0.72 |
| 8 | -12 | -1 | 3.05   | 0.65 |
| 8 | -12 | 0  | 109.16 | 3.13 |
| 8 | -12 | 0  | 102.36 | 2.81 |
| 8 | -12 | 1  | 37.13  | 1.70 |
| 8 | -12 | 1  | 34.69  | 1.60 |
| 8 | -12 | 2  | 14.99  | 1.17 |
| 8 | -12 | 2  | 14.22  | 1.10 |
| 8 | -12 | 2  | 14.37  | 1.01 |
| 8 | -12 | 3  | 141.69 | 3.12 |
| 8 | -12 | 3  | 141.81 | 2.76 |
| 8 | -12 | 3  | 134.67 | 3.09 |
| 8 | -12 | 4  | 3.69   | 0.59 |
| 8 | -12 | 4  | 3.47   | 0.62 |
| 8 | -12 | 4  | 3.20   | 0.58 |
| 8 | -11 | -6 | 18.33  | 1.13 |
| 8 | -11 | -6 | 18.62  | 1.11 |
| 8 | -11 | -5 | 340.42 | 5.82 |
| 8 | -11 | -5 | 318.94 | 5.24 |
| 8 | -11 | -4 | 59.14  | 2.44 |
| 8 | -11 | -4 | 55.50  | 2.25 |
| 8 | -11 | -4 | 53.32  | 1.82 |
| 8 | -11 | -3 | 3.09   | 0.72 |
| 8 | -11 | -3 | 3.81   | 0.97 |
| 8 | -11 | -3 | 2.47   | 0.59 |
| 8 | -11 | -3 | 3.17   | 0.80 |
| 8 | -11 | -3 | 2.99   | 0.82 |
| 8 | -11 | -3 | 3.14   | 0.87 |
| 8 | -11 | -2 | 58.89  | 2.26 |
| 8 | -11 | -2 | 66.12  | 2.78 |
| 8 | -11 | -2 | 56.72  | 2.58 |
| 8 | -11 | -2 | 57.91  | 2.61 |
| 8 | -11 | -2 | 60.64  | 2.63 |
| 8 | -11 | -2 | 56.57  | 2.34 |
| 8 | -11 | -1 | 47.82  | 2.08 |
| 8 | -11 | -1 | 46.21  | 2.18 |
| 8 | -11 | -1 | 38.60  | 1.81 |
| 8 | -11 | -1 | 44.08  | 2.32 |
| 8 | -11 | -1 | 45.43  | 2.37 |

## CIF 31

|   |     |    |        |      |
|---|-----|----|--------|------|
| 8 | -11 | -1 | 47.82  | 2.37 |
| 8 | -11 | -1 | 53.36  | 2.34 |
| 8 | -11 | 0  | 0.92   | 0.83 |
| 8 | -11 | 0  | 0.76   | 0.73 |
| 8 | -11 | 0  | 0.40   | 0.67 |
| 8 | -11 | 0  | 0.56   | 0.71 |
| 8 | -11 | 0  | 1.39   | 0.80 |
| 8 | -11 | 1  | 10.30  | 1.26 |
| 8 | -11 | 1  | 11.62  | 1.65 |
| 8 | -11 | 1  | 11.73  | 1.28 |
| 8 | -11 | 1  | 11.67  | 1.28 |
| 8 | -11 | 1  | 10.15  | 1.28 |
| 8 | -11 | 1  | 9.75   | 1.17 |
| 8 | -11 | 1  | 11.11  | 1.35 |
| 8 | -11 | 1  | 12.22  | 1.26 |
| 8 | -11 | 2  | 42.72  | 2.18 |
| 8 | -11 | 2  | 40.93  | 2.60 |
| 8 | -11 | 2  | 41.28  | 2.16 |
| 8 | -11 | 2  | 35.33  | 2.00 |
| 8 | -11 | 2  | 39.07  | 2.18 |
| 8 | -11 | 2  | 34.06  | 1.97 |
| 8 | -11 | 2  | 39.19  | 2.21 |
| 8 | -11 | 2  | 46.73  | 2.10 |
| 8 | -11 | 3  | 82.45  | 2.87 |
| 8 | -11 | 3  | 76.49  | 3.26 |
| 8 | -11 | 3  | 74.69  | 2.90 |
| 8 | -11 | 3  | 82.12  | 3.03 |
| 8 | -11 | 3  | 80.71  | 2.56 |
| 8 | -11 | 4  | 64.11  | 2.38 |
| 8 | -11 | 4  | 55.81  | 2.38 |
| 8 | -11 | 4  | 63.21  | 2.46 |
| 8 | -11 | 4  | 53.16  | 2.36 |
| 8 | -11 | 4  | 60.14  | 2.51 |
| 8 | -11 | 4  | 68.89  | 2.06 |
| 8 | -11 | 5  | 9.77   | 0.94 |
| 8 | -11 | 5  | 11.49  | 1.13 |
| 8 | -11 | 5  | 10.55  | 1.04 |
| 8 | -11 | 5  | 11.58  | 1.20 |
| 8 | -11 | 6  | 291.32 | 4.41 |
| 8 | -11 | 6  | 309.84 | 5.01 |
| 8 | -10 | -8 | 34.98  | 1.17 |

## CIF 31

|   |     |    |        |      |
|---|-----|----|--------|------|
| 8 | -10 | -7 | 47.80  | 2.06 |
| 8 | -10 | -7 | 45.46  | 1.62 |
| 8 | -10 | -6 | 293.77 | 5.87 |
| 8 | -10 | -6 | 281.44 | 5.85 |
| 8 | -10 | -6 | 284.42 | 5.83 |
| 8 | -10 | -6 | 271.69 | 4.68 |
| 8 | -10 | -6 | 300.10 | 5.78 |
| 8 | -10 | -6 | 300.10 | 6.04 |
| 8 | -10 | -5 | 17.36  | 1.37 |
| 8 | -10 | -5 | 18.65  | 1.62 |
| 8 | -10 | -5 | 18.00  | 1.59 |
| 8 | -10 | -5 | 16.04  | 1.53 |
| 8 | -10 | -5 | 17.51  | 1.59 |
| 8 | -10 | -5 | 17.56  | 1.17 |
| 8 | -10 | -5 | 17.11  | 1.20 |
| 8 | -10 | -4 | 135.16 | 3.63 |
| 8 | -10 | -4 | 124.87 | 3.75 |
| 8 | -10 | -4 | 120.22 | 4.05 |
| 8 | -10 | -4 | 101.36 | 3.17 |
| 8 | -10 | -4 | 115.78 | 3.94 |
| 8 | -10 | -4 | 118.44 | 4.03 |
| 8 | -10 | -4 | 117.10 | 3.94 |
| 8 | -10 | -3 | 1.91   | 0.90 |
| 8 | -10 | -3 | 2.30   | 0.87 |
| 8 | -10 | -3 | 1.89   | 0.85 |
| 8 | -10 | -3 | 1.77   | 0.93 |
| 8 | -10 | -3 | 1.38   | 0.65 |
| 8 | -10 | -3 | 2.14   | 0.90 |
| 8 | -10 | -3 | 1.73   | 0.90 |
| 8 | -10 | -3 | 1.64   | 0.71 |
| 8 | -10 | -3 | 1.67   | 0.96 |
| 8 | -10 | -2 | 306.29 | 6.49 |
| 8 | -10 | -2 | 310.20 | 6.65 |
| 8 | -10 | -2 | 255.68 | 5.45 |
| 8 | -10 | -2 | 275.00 | 6.43 |
| 8 | -10 | -2 | 292.20 | 6.80 |
| 8 | -10 | -2 | 269.76 | 6.20 |
| 8 | -10 | -2 | 317.44 | 7.03 |
| 8 | -10 | -1 | 9.98   | 1.42 |
| 8 | -10 | -1 | 11.03  | 2.00 |
| 8 | -10 | -1 | 9.97   | 1.42 |

## CIF 31

|   |     |    |        |      |
|---|-----|----|--------|------|
| 8 | -10 | -1 | 10.23  | 1.48 |
| 8 | -10 | -1 | 7.71   | 1.04 |
| 8 | -10 | -1 | 6.87   | 1.18 |
| 8 | -10 | -1 | 7.46   | 1.31 |
| 8 | -10 | -1 | 7.34   | 1.25 |
| 8 | -10 | -1 | 8.07   | 1.41 |
| 8 | -10 | 0  | 166.61 | 4.80 |
| 8 | -10 | 0  | 160.98 | 5.32 |
| 8 | -10 | 0  | 174.62 | 5.07 |
| 8 | -10 | 0  | 158.96 | 4.82 |
| 8 | -10 | 0  | 171.66 | 4.94 |
| 8 | -10 | 0  | 148.33 | 4.88 |
| 8 | -10 | 0  | 154.26 | 4.84 |
| 8 | -10 | 0  | 169.48 | 5.11 |
| 8 | -10 | 1  | 3.02   | 1.41 |
| 8 | -10 | 1  | 2.31   | 0.99 |
| 8 | -10 | 1  | 1.44   | 1.05 |
| 8 | -10 | 1  | 2.51   | 0.99 |
| 8 | -10 | 1  | 1.73   | 0.87 |
| 8 | -10 | 1  | 1.70   | 1.00 |
| 8 | -10 | 1  | 2.35   | 1.07 |
| 8 | -10 | 1  | 1.42   | 1.09 |
| 8 | -10 | 2  | 0.99   | 1.02 |
| 8 | -10 | 2  | 2.92   | 0.96 |
| 8 | -10 | 2  | 2.49   | 0.87 |
| 8 | -10 | 2  | 2.23   | 1.08 |
| 8 | -10 | 2  | 1.76   | 0.93 |
| 8 | -10 | 2  | 2.04   | 0.84 |
| 8 | -10 | 2  | 2.33   | 0.97 |
| 8 | -10 | 2  | 1.94   | 1.22 |
| 8 | -10 | 3  | 16.24  | 1.41 |
| 8 | -10 | 3  | 14.90  | 1.49 |
| 8 | -10 | 3  | 15.56  | 1.64 |
| 8 | -10 | 3  | 14.86  | 1.54 |
| 8 | -10 | 3  | 14.23  | 1.44 |
| 8 | -10 | 3  | 14.57  | 1.58 |
| 8 | -10 | 3  | 13.86  | 1.74 |
| 8 | -10 | 4  | 212.17 | 4.85 |
| 8 | -10 | 4  | 212.57 | 5.16 |
| 8 | -10 | 4  | 203.27 | 5.04 |
| 8 | -10 | 4  | 198.91 | 5.21 |



## CIF 31

|   |     |    |        |      |
|---|-----|----|--------|------|
| 8 | -10 | 4  | 199.05 | 5.25 |
| 8 | -10 | 4  | 206.18 | 4.25 |
| 8 | -10 | 5  | 38.72  | 1.93 |
| 8 | -10 | 5  | 38.38  | 2.14 |
| 8 | -10 | 5  | 34.78  | 1.96 |
| 8 | -10 | 5  | 33.92  | 1.78 |
| 8 | -10 | 5  | 36.85  | 2.11 |
| 8 | -10 | 5  | 36.52  | 2.12 |
| 8 | -10 | 6  | 10.09  | 0.97 |
| 8 | -10 | 6  | 11.94  | 1.25 |
| 8 | -10 | 6  | 10.47  | 1.06 |
| 8 | -10 | 6  | 8.60   | 1.04 |
| 8 | -10 | 7  | 60.28  | 2.01 |
| 8 | -9  | -9 | 23.22  | 1.21 |
| 8 | -9  | -9 | 19.34  | 1.14 |
| 8 | -9  | -8 | 356.90 | 5.52 |
| 8 | -9  | -8 | 346.85 | 6.22 |
| 8 | -9  | -7 | 372.36 | 5.33 |
| 8 | -9  | -7 | 378.40 | 6.85 |
| 8 | -9  | -7 | 373.71 | 7.20 |
| 8 | -9  | -7 | 368.65 | 7.19 |
| 8 | -9  | -7 | 362.47 | 7.37 |
| 8 | -9  | -7 | 378.34 | 7.20 |
| 8 | -9  | -7 | 394.42 | 7.50 |
| 8 | -9  | -6 | 120.12 | 4.01 |
| 8 | -9  | -6 | 121.36 | 4.07 |
| 8 | -9  | -6 | 107.30 | 3.88 |
| 8 | -9  | -6 | 119.46 | 4.24 |
| 8 | -9  | -6 | 119.83 | 4.16 |
| 8 | -9  | -6 | 129.91 | 3.56 |
| 8 | -9  | -6 | 114.74 | 3.06 |
| 8 | -9  | -5 | 23.53  | 1.89 |
| 8 | -9  | -5 | 22.25  | 1.92 |
| 8 | -9  | -5 | 19.46  | 1.50 |
| 8 | -9  | -5 | 21.98  | 1.90 |
| 8 | -9  | -5 | 23.55  | 2.08 |
| 8 | -9  | -5 | 21.43  | 1.76 |
| 8 | -9  | -5 | 23.79  | 2.07 |
| 8 | -9  | -5 | 28.14  | 1.68 |
| 8 | -9  | -4 | 136.78 | 4.49 |
| 8 | -9  | -4 | 132.15 | 4.48 |

## CIF 31

|   |    |    |        |      |
|---|----|----|--------|------|
| 8 | -9 | -4 | 129.18 | 4.49 |
| 8 | -9 | -4 | 117.87 | 3.67 |
| 8 | -9 | -4 | 122.97 | 4.35 |
| 8 | -9 | -4 | 127.08 | 4.62 |
| 8 | -9 | -4 | 119.48 | 4.20 |
| 8 | -9 | -4 | 135.14 | 4.65 |
| 8 | -9 | -4 | 131.09 | 3.48 |
| 8 | -9 | -3 | 34.26  | 2.50 |
| 8 | -9 | -3 | 35.95  | 2.47 |
| 8 | -9 | -3 | 37.46  | 2.45 |
| 8 | -9 | -3 | 37.32  | 2.58 |
| 8 | -9 | -3 | 33.53  | 2.38 |
| 8 | -9 | -3 | 35.73  | 2.53 |
| 8 | -9 | -2 | 171.77 | 5.30 |
| 8 | -9 | -2 | 200.86 | 6.10 |
| 8 | -9 | -2 | 204.93 | 5.80 |
| 8 | -9 | -2 | 200.35 | 5.59 |
| 8 | -9 | -2 | 178.07 | 5.24 |
| 8 | -9 | -2 | 197.55 | 5.49 |
| 8 | -9 | -2 | 163.45 | 5.39 |
| 8 | -9 | -2 | 170.32 | 5.38 |
| 8 | -9 | -2 | 195.04 | 5.79 |
| 8 | -9 | -1 | 24.37  | 2.54 |
| 8 | -9 | -1 | 34.32  | 2.30 |
| 8 | -9 | -1 | 30.95  | 3.43 |
| 8 | -9 | -1 | 31.68  | 2.55 |
| 8 | -9 | -1 | 33.14  | 2.40 |
| 8 | -9 | -1 | 27.36  | 2.14 |
| 8 | -9 | -1 | 30.12  | 2.44 |
| 8 | -9 | -1 | 24.67  | 2.30 |
| 8 | -9 | 0  | 36.95  | 2.78 |
| 8 | -9 | 0  | 42.72  | 2.55 |
| 8 | -9 | 0  | 46.38  | 2.77 |
| 8 | -9 | 0  | 41.59  | 2.68 |
| 8 | -9 | 0  | 41.29  | 2.57 |
| 8 | -9 | 0  | 37.03  | 2.66 |
| 8 | -9 | 1  | 11.10  | 1.62 |
| 8 | -9 | 1  | 11.95  | 1.74 |
| 8 | -9 | 1  | 12.60  | 1.51 |
| 8 | -9 | 1  | 12.88  | 1.67 |
| 8 | -9 | 1  | 13.61  | 1.65 |

## CIF 31

|   |    |   |        |      |
|---|----|---|--------|------|
| 8 | -9 | 1 | 11.74  | 1.45 |
| 8 | -9 | 1 | 10.21  | 1.63 |
| 8 | -9 | 1 | 10.32  | 1.58 |
| 8 | -9 | 2 | 30.67  | 2.35 |
| 8 | -9 | 2 | 30.21  | 2.34 |
| 8 | -9 | 2 | 34.16  | 2.25 |
| 8 | -9 | 2 | 36.60  | 2.44 |
| 8 | -9 | 2 | 35.78  | 2.38 |
| 8 | -9 | 2 | 29.07  | 2.09 |
| 8 | -9 | 2 | 29.05  | 2.31 |
| 8 | -9 | 2 | 31.25  | 2.42 |
| 8 | -9 | 3 | 9.06   | 1.54 |
| 8 | -9 | 3 | 5.40   | 1.20 |
| 8 | -9 | 3 | 6.27   | 1.18 |
| 8 | -9 | 3 | 6.46   | 1.30 |
| 8 | -9 | 3 | 7.25   | 1.17 |
| 8 | -9 | 3 | 7.43   | 1.28 |
| 8 | -9 | 3 | 4.40   | 0.98 |
| 8 | -9 | 3 | 4.03   | 1.17 |
| 8 | -9 | 3 | 4.16   | 1.19 |
| 8 | -9 | 4 | 8.74   | 1.37 |
| 8 | -9 | 4 | 9.24   | 1.07 |
| 8 | -9 | 4 | 8.91   | 1.24 |
| 8 | -9 | 4 | 9.20   | 1.20 |
| 8 | -9 | 4 | 7.77   | 1.25 |
| 8 | -9 | 4 | 9.14   | 1.17 |
| 8 | -9 | 4 | 8.33   | 1.33 |
| 8 | -9 | 4 | 9.55   | 1.45 |
| 8 | -9 | 5 | 67.41  | 3.16 |
| 8 | -9 | 5 | 75.41  | 2.79 |
| 8 | -9 | 5 | 72.35  | 2.68 |
| 8 | -9 | 5 | 78.77  | 3.10 |
| 8 | -9 | 5 | 60.43  | 2.47 |
| 8 | -9 | 5 | 65.03  | 3.01 |
| 8 | -9 | 5 | 59.62  | 2.98 |
| 8 | -9 | 6 | 265.68 | 4.94 |
| 8 | -9 | 6 | 277.58 | 5.51 |
| 8 | -9 | 6 | 272.80 | 5.75 |
| 8 | -9 | 7 | 232.53 | 3.94 |
| 8 | -9 | 7 | 279.26 | 4.84 |
| 8 | -9 | 8 | 1.96   | 0.56 |

## CIF 31

|   |    |     |        |      |
|---|----|-----|--------|------|
| 8 | -8 | -10 | 0.81   | 0.49 |
| 8 | -8 | -10 | 0.88   | 0.56 |
| 8 | -8 | -10 | 0.55   | 0.48 |
| 8 | -8 | -9  | 28.31  | 1.47 |
| 8 | -8 | -9  | 25.91  | 1.71 |
| 8 | -8 | -9  | 24.16  | 1.78 |
| 8 | -8 | -9  | 31.00  | 1.70 |
| 8 | -8 | -9  | 26.23  | 1.74 |
| 8 | -8 | -8  | 2.91   | 0.94 |
| 8 | -8 | -8  | 1.80   | 0.84 |
| 8 | -8 | -8  | 1.77   | 0.88 |
| 8 | -8 | -8  | 2.21   | 0.73 |
| 8 | -8 | -8  | 2.39   | 1.01 |
| 8 | -8 | -8  | 2.25   | 0.86 |
| 8 | -8 | -8  | 1.76   | 1.00 |
| 8 | -8 | -7  | 204.33 | 5.72 |
| 8 | -8 | -7  | 178.56 | 5.17 |
| 8 | -8 | -7  | 160.95 | 4.98 |
| 8 | -8 | -7  | 187.00 | 5.55 |
| 8 | -8 | -7  | 180.39 | 5.14 |
| 8 | -8 | -7  | 184.33 | 5.40 |
| 8 | -8 | -7  | 210.67 | 4.89 |
| 8 | -8 | -7  | 192.63 | 5.63 |
| 8 | -8 | -6  | 257.93 | 6.41 |
| 8 | -8 | -6  | 248.36 | 6.25 |
| 8 | -8 | -6  | 230.66 | 6.13 |
| 8 | -8 | -6  | 242.65 | 6.61 |
| 8 | -8 | -6  | 221.03 | 6.06 |
| 8 | -8 | -6  | 245.79 | 6.55 |
| 8 | -8 | -6  | 249.96 | 5.45 |
| 8 | -8 | -5  | 1.73   | 0.79 |
| 8 | -8 | -5  | 1.83   | 0.92 |
| 8 | -8 | -5  | 1.34   | 0.93 |
| 8 | -8 | -5  | 4.56   | 1.27 |
| 8 | -8 | -5  | 2.35   | 1.16 |
| 8 | -8 | -5  | 2.50   | 1.04 |
| 8 | -8 | -5  | 1.82   | 0.92 |
| 8 | -8 | -5  | 1.74   | 1.16 |
| 8 | -8 | -5  | 1.96   | 0.95 |
| 8 | -8 | -5  | 2.09   | 0.86 |
| 8 | -8 | -5  | 2.96   | 0.87 |

## CIF 31

|   |    |    |        |      |
|---|----|----|--------|------|
| 8 | -8 | -4 | 233.60 | 6.26 |
| 8 | -8 | -4 | 253.18 | 6.67 |
| 8 | -8 | -4 | 255.41 | 6.65 |
| 8 | -8 | -4 | 249.77 | 6.86 |
| 8 | -8 | -4 | 256.12 | 6.68 |
| 8 | -8 | -4 | 244.31 | 6.49 |
| 8 | -8 | -4 | 240.49 | 6.10 |
| 8 | -8 | -4 | 252.08 | 6.46 |
| 8 | -8 | -4 | 237.49 | 6.59 |
| 8 | -8 | -4 | 247.61 | 5.92 |
| 8 | -8 | -4 | 251.37 | 5.25 |
| 8 | -8 | -3 | 21.74  | 2.33 |
| 8 | -8 | -3 | 22.90  | 2.04 |
| 8 | -8 | -3 | 21.46  | 2.59 |
| 8 | -8 | -3 | 24.33  | 2.19 |
| 8 | -8 | -3 | 22.88  | 2.01 |
| 8 | -8 | -3 | 23.20  | 2.52 |
| 8 | -8 | -3 | 22.90  | 1.99 |
| 8 | -8 | -3 | 21.09  | 2.15 |
| 8 | -8 | -3 | 22.81  | 1.76 |
| 8 | -8 | -2 | 29.83  | 2.76 |
| 8 | -8 | -2 | 30.30  | 2.21 |
| 8 | -8 | -2 | 29.28  | 2.18 |
| 8 | -8 | -2 | 24.64  | 3.31 |
| 8 | -8 | -2 | 29.90  | 2.46 |
| 8 | -8 | -2 | 29.54  | 2.29 |
| 8 | -8 | -2 | 32.65  | 2.32 |
| 8 | -8 | -2 | 31.01  | 2.57 |
| 8 | -8 | -2 | 29.17  | 2.49 |
| 8 | -8 | -2 | 29.93  | 2.75 |
| 8 | -8 | -2 | 27.52  | 1.82 |
| 8 | -8 | -1 | 58.42  | 3.38 |
| 8 | -8 | -1 | 58.18  | 2.96 |
| 8 | -8 | -1 | 57.84  | 3.08 |
| 8 | -8 | -1 | 60.12  | 3.03 |
| 8 | -8 | -1 | 55.69  | 3.23 |
| 8 | -8 | -1 | 52.82  | 3.24 |
| 8 | -8 | -1 | 54.94  | 3.15 |
| 8 | -8 | -1 | 58.21  | 3.29 |
| 8 | -8 | 0  | 112.43 | 4.55 |
| 8 | -8 | 0  | 112.73 | 4.12 |

## CIF 31

|   |    |   |        |       |
|---|----|---|--------|-------|
| 8 | -8 | 0 | 113.24 | 4.04  |
| 8 | -8 | 0 | 110.72 | 4.21  |
| 8 | -8 | 0 | 120.65 | 4.45  |
| 8 | -8 | 0 | 107.49 | 3.98  |
| 8 | -8 | 0 | 107.15 | 4.52  |
| 8 | -8 | 0 | 107.21 | 4.40  |
| 8 | -8 | 0 | 109.91 | 4.52  |
| 8 | -8 | 1 | 128.53 | 4.96  |
| 8 | -8 | 1 | 132.33 | 4.59  |
| 8 | -8 | 1 | 121.57 | 4.14  |
| 8 | -8 | 1 | 123.73 | 4.43  |
| 8 | -8 | 1 | 121.54 | 4.41  |
| 8 | -8 | 1 | 113.47 | 4.03  |
| 8 | -8 | 1 | 119.08 | 4.62  |
| 8 | -8 | 1 | 103.99 | 4.56  |
| 8 | -8 | 1 | 127.73 | 4.83  |
| 8 | -8 | 2 | 543.68 | 10.72 |
| 8 | -8 | 2 | 582.41 | 10.37 |
| 8 | -8 | 2 | 549.59 | 9.44  |
| 8 | -8 | 2 | 550.87 | 9.88  |
| 8 | -8 | 2 | 564.87 | 9.38  |
| 8 | -8 | 2 | 555.39 | 9.97  |
| 8 | -8 | 2 | 522.95 | 9.19  |
| 8 | -8 | 2 | 510.78 | 10.13 |
| 8 | -8 | 2 | 482.15 | 10.32 |
| 8 | -8 | 2 | 610.08 | 11.13 |
| 8 | -8 | 3 | 153.77 | 5.05  |
| 8 | -8 | 3 | 146.13 | 4.38  |
| 8 | -8 | 3 | 139.53 | 4.24  |
| 8 | -8 | 3 | 145.39 | 4.71  |
| 8 | -8 | 3 | 151.06 | 4.41  |
| 8 | -8 | 3 | 140.90 | 4.86  |
| 8 | -8 | 3 | 137.29 | 4.99  |
| 8 | -8 | 3 | 146.10 | 5.21  |
| 8 | -8 | 4 | 69.17  | 3.30  |
| 8 | -8 | 4 | 68.44  | 2.88  |
| 8 | -8 | 4 | 65.97  | 2.77  |
| 8 | -8 | 4 | 63.57  | 3.00  |
| 8 | -8 | 4 | 57.75  | 2.60  |
| 8 | -8 | 4 | 66.47  | 3.28  |
| 8 | -8 | 4 | 69.79  | 3.53  |

## CIF 31

|   |    |     |        |      |
|---|----|-----|--------|------|
| 8 | -8 | 5   | 379.48 | 6.68 |
| 8 | -8 | 5   | 358.58 | 7.62 |
| 8 | -8 | 5   | 375.28 | 8.21 |
| 8 | -8 | 6   | 123.20 | 3.26 |
| 8 | -8 | 6   | 121.34 | 3.64 |
| 8 | -8 | 6   | 129.57 | 3.98 |
| 8 | -8 | 6   | 117.04 | 4.11 |
| 8 | -8 | 7   | 142.25 | 3.46 |
| 8 | -8 | 7   | 134.26 | 3.96 |
| 8 | -7 | -11 | 32.53  | 1.46 |
| 8 | -7 | -11 | 30.76  | 1.67 |
| 8 | -7 | -10 | 116.08 | 3.92 |
| 8 | -7 | -10 | 122.69 | 3.71 |
| 8 | -7 | -9  | 26.51  | 2.13 |
| 8 | -7 | -9  | 25.32  | 2.06 |
| 8 | -7 | -9  | 22.18  | 1.84 |
| 8 | -7 | -9  | 26.52  | 1.78 |
| 8 | -7 | -9  | 24.02  | 1.97 |
| 8 | -7 | -8  | 224.90 | 6.28 |
| 8 | -7 | -8  | 208.65 | 5.61 |
| 8 | -7 | -8  | 196.51 | 5.67 |
| 8 | -7 | -8  | 230.19 | 6.21 |
| 8 | -7 | -7  | 85.07  | 3.59 |
| 8 | -7 | -7  | 81.63  | 3.45 |
| 8 | -7 | -7  | 94.29  | 4.20 |
| 8 | -7 | -7  | 80.13  | 3.54 |
| 8 | -7 | -7  | 84.80  | 3.63 |
| 8 | -7 | -7  | 79.82  | 3.65 |
| 8 | -7 | -7  | 97.85  | 4.25 |
| 8 | -7 | -6  | 1.96   | 0.93 |
| 8 | -7 | -6  | 1.43   | 0.98 |
| 8 | -7 | -6  | 2.16   | 1.10 |
| 8 | -7 | -6  | 6.20   | 1.46 |
| 8 | -7 | -6  | 2.23   | 1.06 |
| 8 | -7 | -6  | 0.90   | 0.93 |
| 8 | -7 | -6  | 1.68   | 0.91 |
| 8 | -7 | -6  | 2.38   | 0.98 |
| 8 | -7 | -6  | 4.96   | 1.21 |
| 8 | -7 | -6  | 1.09   | 0.80 |
| 8 | -7 | -5  | 292.40 | 7.28 |
| 8 | -7 | -5  | 355.28 | 8.08 |

## CIF 31

|   |    |    |        |      |
|---|----|----|--------|------|
| 8 | -7 | -5 | 305.20 | 7.72 |
| 8 | -7 | -5 | 302.86 | 7.05 |
| 8 | -7 | -5 | 295.00 | 7.70 |
| 8 | -7 | -5 | 315.55 | 7.66 |
| 8 | -7 | -5 | 335.43 | 7.49 |
| 8 | -7 | -5 | 299.98 | 7.23 |
| 8 | -7 | -5 | 325.98 | 7.30 |
| 8 | -7 | -5 | 298.68 | 7.69 |
| 8 | -7 | -5 | 308.70 | 7.67 |
| 8 | -7 | -5 | 306.12 | 7.66 |
| 8 | -7 | -4 | 102.15 | 4.42 |
| 8 | -7 | -4 | 102.56 | 5.02 |
| 8 | -7 | -4 | 117.53 | 4.62 |
| 8 | -7 | -4 | 107.00 | 4.74 |
| 8 | -7 | -4 | 107.64 | 4.54 |
| 8 | -7 | -4 | 111.59 | 4.19 |
| 8 | -7 | -4 | 117.28 | 4.66 |
| 8 | -7 | -4 | 116.54 | 4.20 |
| 8 | -7 | -4 | 112.97 | 4.64 |
| 8 | -7 | -4 | 107.63 | 4.49 |
| 8 | -7 | -4 | 94.57  | 4.45 |
| 8 | -7 | -4 | 109.05 | 4.52 |
| 8 | -7 | -3 | 24.57  | 2.63 |
| 8 | -7 | -3 | 29.52  | 2.40 |
| 8 | -7 | -3 | 29.98  | 3.13 |
| 8 | -7 | -3 | 25.81  | 2.33 |
| 8 | -7 | -3 | 27.33  | 2.20 |
| 8 | -7 | -3 | 26.71  | 2.58 |
| 8 | -7 | -3 | 24.06  | 1.96 |
| 8 | -7 | -3 | 27.18  | 2.33 |
| 8 | -7 | -3 | 26.14  | 2.40 |
| 8 | -7 | -3 | 20.41  | 2.63 |
| 8 | -7 | -3 | 28.82  | 2.42 |
| 8 | -7 | -2 | 20.67  | 2.25 |
| 8 | -7 | -2 | 22.04  | 1.84 |
| 8 | -7 | -2 | 23.93  | 2.06 |
| 8 | -7 | -2 | 23.00  | 2.02 |
| 8 | -7 | -2 | 19.78  | 1.75 |
| 8 | -7 | -2 | 21.25  | 2.05 |
| 8 | -7 | -2 | 20.94  | 2.16 |
| 8 | -7 | -2 | 18.77  | 2.13 |



## CIF 31

|   |    |    |        |      |
|---|----|----|--------|------|
| 8 | -7 | -2 | 22.18  | 1.94 |
| 8 | -7 | -2 | 25.99  | 2.24 |
| 8 | -7 | -1 | 1.81   | 1.08 |
| 8 | -7 | -1 | 0.94   | 0.77 |
| 8 | -7 | -1 | 3.61   | 0.97 |
| 8 | -7 | -1 | 0.79   | 0.86 |
| 8 | -7 | -1 | 1.49   | 0.95 |
| 8 | -7 | -1 | 0.54   | 0.87 |
| 8 | -7 | -1 | 0.85   | 0.69 |
| 8 | -7 | -1 | 0.30   | 0.94 |
| 8 | -7 | -1 | 1.57   | 1.16 |
| 8 | -7 | -1 | 1.59   | 0.91 |
| 8 | -7 | -1 | 0.19   | 0.94 |
| 8 | -7 | 0  | 223.01 | 6.67 |
| 8 | -7 | 0  | 242.76 | 6.16 |
| 8 | -7 | 0  | 238.16 | 5.65 |
| 8 | -7 | 0  | 215.07 | 5.76 |
| 8 | -7 | 0  | 221.27 | 5.95 |
| 8 | -7 | 0  | 201.40 | 5.26 |
| 8 | -7 | 0  | 201.15 | 6.09 |
| 8 | -7 | 0  | 235.03 | 6.37 |
| 8 | -7 | 1  | 32.18  | 2.63 |
| 8 | -7 | 1  | 31.43  | 2.32 |
| 8 | -7 | 1  | 28.66  | 2.01 |
| 8 | -7 | 1  | 30.97  | 2.25 |
| 8 | -7 | 1  | 27.77  | 1.93 |
| 8 | -7 | 1  | 29.88  | 2.22 |
| 8 | -7 | 1  | 36.28  | 2.18 |
| 8 | -7 | 1  | 30.75  | 2.43 |
| 8 | -7 | 1  | 28.44  | 2.31 |
| 8 | -7 | 2  | 6.09   | 1.44 |
| 8 | -7 | 2  | 8.56   | 1.42 |
| 8 | -7 | 2  | 7.48   | 1.14 |
| 8 | -7 | 2  | 8.89   | 1.20 |
| 8 | -7 | 2  | 7.71   | 1.31 |
| 8 | -7 | 2  | 5.63   | 1.01 |
| 8 | -7 | 2  | 6.81   | 1.36 |
| 8 | -7 | 2  | 6.94   | 1.52 |
| 8 | -7 | 2  | 9.00   | 1.44 |
| 8 | -7 | 3  | 110.26 | 3.66 |
| 8 | -7 | 3  | 101.83 | 3.47 |

## CIF 31

|   |    |     |         |       |
|---|----|-----|---------|-------|
| 8 | -7 | 3   | 106.97  | 3.98  |
| 8 | -7 | 3   | 114.49  | 4.33  |
| 8 | -7 | 3   | 110.43  | 4.57  |
| 8 | -7 | 4   | 708.14  | 10.11 |
| 8 | -7 | 4   | 701.51  | 10.98 |
| 8 | -7 | 4   | 686.37  | 11.42 |
| 8 | -7 | 4   | 711.48  | 12.10 |
| 8 | -7 | 5   | 8.40    | 1.32  |
| 8 | -7 | 5   | 6.30    | 1.11  |
| 8 | -7 | 5   | 7.13    | 1.26  |
| 8 | -7 | 5   | 7.09    | 1.35  |
| 8 | -7 | 6   | 6.31    | 0.99  |
| 8 | -7 | 6   | 8.16    | 1.18  |
| 8 | -7 | 6   | 7.23    | 1.25  |
| 8 | -7 | 7   | 32.96   | 2.05  |
| 8 | -6 | -12 | 51.59   | 2.18  |
| 8 | -6 | -12 | 66.09   | 2.07  |
| 8 | -6 | -11 | 6.52    | 1.15  |
| 8 | -6 | -11 | 5.10    | 0.90  |
| 8 | -6 | -10 | 33.01   | 2.37  |
| 8 | -6 | -10 | 32.75   | 2.21  |
| 8 | -6 | -10 | 32.44   | 2.19  |
| 8 | -6 | -9  | 0.80    | 0.74  |
| 8 | -6 | -9  | 2.51    | 0.97  |
| 8 | -6 | -9  | 0.67    | 1.05  |
| 8 | -6 | -9  | 0.97    | 0.87  |
| 8 | -6 | -9  | 1.51    | 1.12  |
| 8 | -6 | -9  | 1.32    | 1.06  |
| 8 | -6 | -8  | 226.26  | 6.18  |
| 8 | -6 | -8  | 229.32  | 6.24  |
| 8 | -6 | -8  | 271.61  | 6.98  |
| 8 | -6 | -8  | 257.37  | 7.14  |
| 8 | -6 | -8  | 221.81  | 5.89  |
| 8 | -6 | -8  | 213.34  | 6.48  |
| 8 | -6 | -8  | 230.87  | 6.58  |
| 8 | -6 | -8  | 255.46  | 6.01  |
| 8 | -6 | -8  | 237.35  | 6.60  |
| 8 | -6 | -8  | 242.57  | 6.90  |
| 8 | -6 | -7  | 1566.23 | 20.81 |
| 8 | -6 | -7  | 1719.18 | 21.35 |
| 8 | -6 | -7  | 1819.27 | 21.97 |

## CIF 31

|   |    |    |         |       |
|---|----|----|---------|-------|
| 8 | -6 | -7 | 1647.39 | 19.74 |
| 8 | -6 | -7 | 1585.12 | 20.90 |
| 8 | -6 | -7 | 1592.66 | 20.03 |
| 8 | -6 | -7 | 1527.46 | 19.78 |
| 8 | -6 | -7 | 1726.66 | 21.86 |
| 8 | -6 | -7 | 1625.00 | 21.37 |
| 8 | -6 | -7 | 1722.86 | 21.23 |
| 8 | -6 | -7 | 1600.44 | 21.62 |
| 8 | -6 | -6 | 576.94  | 10.81 |
| 8 | -6 | -6 | 551.35  | 10.94 |
| 8 | -6 | -6 | 596.87  | 10.46 |
| 8 | -6 | -6 | 560.73  | 10.94 |
| 8 | -6 | -6 | 624.24  | 11.26 |
| 8 | -6 | -6 | 555.71  | 9.88  |
| 8 | -6 | -6 | 575.18  | 10.56 |
| 8 | -6 | -6 | 520.29  | 9.67  |
| 8 | -6 | -6 | 538.50  | 10.73 |
| 8 | -6 | -6 | 574.04  | 11.08 |
| 8 | -6 | -6 | 542.72  | 10.01 |
| 8 | -6 | -6 | 574.16  | 10.78 |
| 8 | -6 | -5 | 574.68  | 10.79 |
| 8 | -6 | -5 | 522.13  | 10.80 |
| 8 | -6 | -5 | 545.00  | 10.58 |
| 8 | -6 | -5 | 570.01  | 10.87 |
| 8 | -6 | -5 | 520.55  | 10.33 |
| 8 | -6 | -5 | 526.63  | 9.42  |
| 8 | -6 | -5 | 571.31  | 10.61 |
| 8 | -6 | -5 | 490.10  | 9.06  |
| 8 | -6 | -5 | 499.79  | 10.22 |
| 8 | -6 | -5 | 496.43  | 9.94  |
| 8 | -6 | -5 | 522.35  | 10.61 |
| 8 | -6 | -5 | 480.86  | 10.02 |
| 8 | -6 | -5 | 503.30  | 9.87  |
| 8 | -6 | -4 | 3.29    | 1.59  |
| 8 | -6 | -4 | 4.14    | 1.22  |
| 8 | -6 | -4 | 4.24    | 1.81  |
| 8 | -6 | -4 | 3.71    | 0.96  |
| 8 | -6 | -4 | 5.08    | 1.04  |
| 8 | -6 | -4 | 3.73    | 1.75  |
| 8 | -6 | -4 | 4.52    | 1.23  |
| 8 | -6 | -4 | 5.88    | 1.40  |

## CIF 31

|   |    |    |         |       |
|---|----|----|---------|-------|
| 8 | -6 | -4 | 3.74    | 2.38  |
| 8 | -6 | -4 | 5.16    | 1.28  |
| 8 | -6 | -3 | 139.73  | 5.17  |
| 8 | -6 | -3 | 138.58  | 4.93  |
| 8 | -6 | -3 | 130.28  | 4.39  |
| 8 | -6 | -3 | 139.41  | 4.21  |
| 8 | -6 | -3 | 131.40  | 4.79  |
| 8 | -6 | -3 | 121.39  | 4.91  |
| 8 | -6 | -3 | 132.14  | 5.23  |
| 8 | -6 | -3 | 139.33  | 4.43  |
| 8 | -6 | -3 | 134.83  | 4.76  |
| 8 | -6 | -2 | 212.02  | 6.47  |
| 8 | -6 | -2 | 207.58  | 5.97  |
| 8 | -6 | -2 | 204.44  | 5.40  |
| 8 | -6 | -2 | 208.82  | 5.11  |
| 8 | -6 | -2 | 203.44  | 5.86  |
| 8 | -6 | -2 | 216.61  | 5.77  |
| 8 | -6 | -2 | 205.16  | 5.80  |
| 8 | -6 | -1 | 1.97    | 1.12  |
| 8 | -6 | -1 | 4.63    | 1.13  |
| 8 | -6 | -1 | 2.73    | 1.00  |
| 8 | -6 | -1 | 2.36    | 0.89  |
| 8 | -6 | -1 | 2.53    | 1.08  |
| 8 | -6 | -1 | 2.91    | 0.99  |
| 8 | -6 | -1 | 3.46    | 1.11  |
| 8 | -6 | 0  | 32.92   | 2.26  |
| 8 | -6 | 0  | 32.86   | 2.21  |
| 8 | -6 | 0  | 30.17   | 2.13  |
| 8 | -6 | 0  | 24.61   | 2.09  |
| 8 | -6 | 0  | 28.51   | 2.45  |
| 8 | -6 | 0  | 34.31   | 2.44  |
| 8 | -6 | 1  | 226.97  | 5.77  |
| 8 | -6 | 1  | 226.76  | 6.12  |
| 8 | -6 | 1  | 232.09  | 6.66  |
| 8 | -6 | 1  | 247.81  | 6.62  |
| 8 | -6 | 2  | 979.14  | 14.23 |
| 8 | -6 | 2  | 947.48  | 14.92 |
| 8 | -6 | 2  | 1007.04 | 14.96 |
| 8 | -6 | 2  | 975.75  | 15.54 |
| 8 | -6 | 3  | 1070.68 | 14.23 |
| 8 | -6 | 3  | 963.61  | 14.35 |

## CIF 31

|   |    |     |         |       |
|---|----|-----|---------|-------|
| 8 | -6 | 3   | 987.58  | 15.53 |
| 8 | -6 | 3   | 1047.12 | 15.52 |
| 8 | -6 | 3   | 1068.75 | 16.20 |
| 8 | -6 | 4   | 570.70  | 10.19 |
| 8 | -6 | 4   | 514.05  | 8.70  |
| 8 | -6 | 4   | 451.28  | 8.80  |
| 8 | -6 | 4   | 560.90  | 10.32 |
| 8 | -6 | 4   | 491.76  | 10.18 |
| 8 | -6 | 5   | 129.04  | 3.82  |
| 8 | -6 | 5   | 113.90  | 3.88  |
| 8 | -6 | 5   | 122.99  | 4.65  |
| 8 | -6 | 6   | 156.62  | 4.91  |
| 8 | -6 | 7   | 123.99  | 3.74  |
| 8 | -5 | -13 | 106.82  | 2.39  |
| 8 | -5 | -13 | 107.84  | 2.43  |
| 8 | -5 | -12 | 12.87   | 1.47  |
| 8 | -5 | -11 | 56.79   | 2.62  |
| 8 | -5 | -11 | 57.19   | 3.10  |
| 8 | -5 | -11 | 57.80   | 2.98  |
| 8 | -5 | -10 | 146.49  | 4.80  |
| 8 | -5 | -10 | 151.57  | 4.87  |
| 8 | -5 | -10 | 154.54  | 5.37  |
| 8 | -5 | -10 | 142.96  | 5.03  |
| 8 | -5 | -10 | 133.65  | 4.91  |
| 8 | -5 | -10 | 148.22  | 4.89  |
| 8 | -5 | -9  | 90.20   | 4.02  |
| 8 | -5 | -9  | 101.81  | 4.24  |
| 8 | -5 | -9  | 93.33   | 4.02  |
| 8 | -5 | -9  | 91.40   | 3.56  |
| 8 | -5 | -9  | 108.14  | 4.64  |
| 8 | -5 | -9  | 96.84   | 4.28  |
| 8 | -5 | -9  | 90.11   | 4.17  |
| 8 | -5 | -9  | 90.99   | 3.93  |
| 8 | -5 | -9  | 100.28  | 4.40  |
| 8 | -5 | -8  | 4.08    | 1.21  |
| 8 | -5 | -8  | 4.30    | 1.33  |
| 8 | -5 | -8  | 4.00    | 1.24  |
| 8 | -5 | -8  | 2.80    | 1.06  |
| 8 | -5 | -8  | 2.90    | 1.47  |
| 8 | -5 | -8  | 3.00    | 0.94  |
| 8 | -5 | -8  | 2.66    | 1.20  |

## CIF 31

|   |    |    |        |       |
|---|----|----|--------|-------|
| 8 | -5 | -8 | 3.57   | 1.31  |
| 8 | -5 | -8 | 5.06   | 1.29  |
| 8 | -5 | -8 | 3.15   | 1.41  |
| 8 | -5 | -7 | 127.35 | 4.88  |
| 8 | -5 | -7 | 147.71 | 5.39  |
| 8 | -5 | -7 | 130.85 | 4.96  |
| 8 | -5 | -7 | 128.79 | 4.69  |
| 8 | -5 | -7 | 121.46 | 4.15  |
| 8 | -5 | -7 | 132.47 | 4.86  |
| 8 | -5 | -7 | 114.90 | 4.04  |
| 8 | -5 | -7 | 127.55 | 4.87  |
| 8 | -5 | -7 | 130.24 | 5.14  |
| 8 | -5 | -7 | 132.88 | 4.73  |
| 8 | -5 | -7 | 133.99 | 4.81  |
| 8 | -5 | -6 | 301.12 | 7.65  |
| 8 | -5 | -6 | 294.04 | 7.82  |
| 8 | -5 | -6 | 277.36 | 7.34  |
| 8 | -5 | -6 | 275.32 | 7.44  |
| 8 | -5 | -6 | 245.84 | 5.94  |
| 8 | -5 | -6 | 308.42 | 7.62  |
| 8 | -5 | -6 | 248.02 | 5.95  |
| 8 | -5 | -6 | 262.34 | 7.12  |
| 8 | -5 | -6 | 304.21 | 7.43  |
| 8 | -5 | -6 | 276.22 | 7.40  |
| 8 | -5 | -6 | 294.73 | 7.57  |
| 8 | -5 | -6 | 286.54 | 7.13  |
| 8 | -5 | -6 | 288.41 | 7.65  |
| 8 | -5 | -5 | 771.99 | 13.00 |
| 8 | -5 | -5 | 675.65 | 12.81 |
| 8 | -5 | -5 | 760.93 | 12.59 |
| 8 | -5 | -5 | 808.52 | 13.24 |
| 8 | -5 | -5 | 720.22 | 12.25 |
| 8 | -5 | -5 | 661.28 | 12.60 |
| 8 | -5 | -5 | 685.19 | 12.70 |
| 8 | -5 | -5 | 704.72 | 11.85 |
| 8 | -5 | -5 | 793.31 | 13.05 |
| 8 | -5 | -4 | 101.97 | 4.46  |
| 8 | -5 | -4 | 115.04 | 5.02  |
| 8 | -5 | -4 | 105.57 | 4.38  |
| 8 | -5 | -4 | 111.93 | 4.65  |
| 8 | -5 | -4 | 101.04 | 4.26  |

## CIF 31

|   |    |    |        |       |
|---|----|----|--------|-------|
| 8 | -5 | -4 | 111.23 | 4.67  |
| 8 | -5 | -4 | 112.01 | 4.27  |
| 8 | -5 | -4 | 95.13  | 4.62  |
| 8 | -5 | -4 | 97.27  | 3.96  |
| 8 | -5 | -3 | 184.30 | 5.91  |
| 8 | -5 | -3 | 222.31 | 6.20  |
| 8 | -5 | -3 | 196.54 | 6.02  |
| 8 | -5 | -3 | 202.44 | 5.87  |
| 8 | -5 | -3 | 187.13 | 4.91  |
| 8 | -5 | -3 | 196.40 | 5.53  |
| 8 | -5 | -3 | 194.44 | 6.01  |
| 8 | -5 | -3 | 186.19 | 6.30  |
| 8 | -5 | -3 | 208.18 | 5.40  |
| 8 | -5 | -3 | 193.08 | 5.51  |
| 8 | -5 | -2 | 303.83 | 7.32  |
| 8 | -5 | -2 | 295.70 | 6.27  |
| 8 | -5 | -2 | 304.39 | 6.95  |
| 8 | -5 | -2 | 307.95 | 7.58  |
| 8 | -5 | -2 | 299.34 | 6.75  |
| 8 | -5 | -2 | 303.27 | 6.87  |
| 8 | -5 | -1 | 91.97  | 3.87  |
| 8 | -5 | -1 | 78.87  | 3.11  |
| 8 | -5 | -1 | 84.94  | 3.23  |
| 8 | -5 | -1 | 78.82  | 3.44  |
| 8 | -5 | -1 | 86.24  | 3.92  |
| 8 | -5 | -1 | 98.29  | 3.85  |
| 8 | -5 | -1 | 77.96  | 3.45  |
| 8 | -5 | -1 | 78.87  | 3.25  |
| 8 | -5 | 0  | 590.06 | 11.19 |
| 8 | -5 | 0  | 594.11 | 10.25 |
| 8 | -5 | 0  | 566.57 | 9.26  |
| 8 | -5 | 0  | 586.70 | 10.03 |
| 8 | -5 | 0  | 586.38 | 10.81 |
| 8 | -5 | 1  | 10.04  | 1.65  |
| 8 | -5 | 1  | 12.14  | 1.47  |
| 8 | -5 | 1  | 9.45   | 1.19  |
| 8 | -5 | 1  | 7.88   | 1.27  |
| 8 | -5 | 1  | 7.17   | 1.38  |
| 8 | -5 | 2  | 217.00 | 5.15  |
| 8 | -5 | 2  | 208.08 | 5.52  |
| 8 | -5 | 2  | 203.81 | 6.11  |

## CIF 31

|   |    |     |         |       |
|---|----|-----|---------|-------|
| 8 | -5 | 2   | 217.12  | 6.49  |
| 8 | -5 | 3   | 0.64    | 0.91  |
| 8 | -5 | 3   | 1.99    | 0.82  |
| 8 | -5 | 3   | 1.56    | 0.94  |
| 8 | -5 | 3   | 0.54    | 0.80  |
| 8 | -5 | 4   | 98.32   | 4.04  |
| 8 | -5 | 4   | 105.24  | 4.20  |
| 8 | -5 | 4   | 106.49  | 4.35  |
| 8 | -5 | 5   | 0.99    | 0.90  |
| 8 | -5 | 5   | 1.41    | 0.82  |
| 8 | -5 | 5   | 1.23    | 0.77  |
| 8 | -5 | 6   | 55.85   | 2.68  |
| 8 | -5 | 6   | 61.08   | 2.96  |
| 8 | -4 | -13 | 32.28   | 2.04  |
| 8 | -4 | -12 | 0.34    | 0.73  |
| 8 | -4 | -12 | 1.04    | 1.00  |
| 8 | -4 | -12 | 0.08    | 0.77  |
| 8 | -4 | -11 | 303.70  | 7.19  |
| 8 | -4 | -11 | 327.94  | 7.40  |
| 8 | -4 | -11 | 331.70  | 7.98  |
| 8 | -4 | -11 | 323.88  | 7.72  |
| 8 | -4 | -11 | 326.55  | 7.29  |
| 8 | -4 | -10 | 1.93    | 1.01  |
| 8 | -4 | -10 | 3.15    | 1.24  |
| 8 | -4 | -10 | 1.78    | 0.93  |
| 8 | -4 | -10 | 6.53    | 1.43  |
| 8 | -4 | -10 | 2.56    | 1.17  |
| 8 | -4 | -10 | 2.81    | 1.15  |
| 8 | -4 | -9  | 1615.99 | 21.47 |
| 8 | -4 | -9  | 1683.49 | 22.31 |
| 8 | -4 | -9  | 1779.79 | 21.62 |
| 8 | -4 | -9  | 1662.64 | 21.00 |
| 8 | -4 | -9  | 1607.75 | 21.75 |
| 8 | -4 | -9  | 1710.97 | 22.39 |
| 8 | -4 | -9  | 1632.99 | 20.82 |
| 8 | -4 | -9  | 1811.83 | 22.69 |
| 8 | -4 | -8  | 23.71   | 2.23  |
| 8 | -4 | -8  | 22.37   | 2.36  |
| 8 | -4 | -8  | 27.85   | 2.42  |
| 8 | -4 | -8  | 25.78   | 2.30  |
| 8 | -4 | -8  | 22.47   | 2.39  |



## CIF 31

|   |    |    |        |       |
|---|----|----|--------|-------|
| 8 | -4 | -8 | 24.26  | 2.24  |
| 8 | -4 | -8 | 21.37  | 2.08  |
| 8 | -4 | -8 | 23.64  | 2.15  |
| 8 | -4 | -8 | 21.73  | 2.38  |
| 8 | -4 | -7 | 689.08 | 12.51 |
| 8 | -4 | -7 | 694.89 | 11.67 |
| 8 | -4 | -7 | 703.53 | 12.96 |
| 8 | -4 | -7 | 706.79 | 12.41 |
| 8 | -4 | -7 | 746.15 | 12.67 |
| 8 | -4 | -7 | 664.73 | 12.46 |
| 8 | -4 | -7 | 695.84 | 12.21 |
| 8 | -4 | -7 | 741.78 | 12.25 |
| 8 | -4 | -7 | 639.28 | 12.00 |
| 8 | -4 | -7 | 702.20 | 11.87 |
| 8 | -4 | -6 | 2.06   | 1.18  |
| 8 | -4 | -6 | 2.46   | 1.81  |
| 8 | -4 | -6 | 3.22   | 1.23  |
| 8 | -4 | -6 | 2.61   | 2.55  |
| 8 | -4 | -6 | 1.88   | 1.20  |
| 8 | -4 | -6 | 2.06   | 1.08  |
| 8 | -4 | -6 | 2.33   | 1.38  |
| 8 | -4 | -6 | 2.79   | 4.11  |
| 8 | -4 | -6 | 1.07   | 0.93  |
| 8 | -4 | -6 | 2.64   | 2.58  |
| 8 | -4 | -6 | 2.26   | 1.15  |
| 8 | -4 | -6 | 1.56   | 2.10  |
| 8 | -4 | -6 | 2.77   | 1.00  |
| 8 | -4 | -6 | 2.89   | 1.11  |
| 8 | -4 | -5 | 432.62 | 9.99  |
| 8 | -4 | -5 | 439.74 | 9.25  |
| 8 | -4 | -5 | 450.47 | 9.21  |
| 8 | -4 | -5 | 491.77 | 9.97  |
| 8 | -4 | -5 | 419.84 | 8.58  |
| 8 | -4 | -5 | 451.09 | 10.29 |
| 8 | -4 | -5 | 463.55 | 9.61  |
| 8 | -4 | -5 | 413.72 | 9.65  |
| 8 | -4 | -5 | 436.85 | 8.60  |
| 8 | -4 | -5 | 473.70 | 9.56  |
| 8 | -4 | -4 | 359.66 | 9.08  |
| 8 | -4 | -4 | 313.53 | 7.68  |
| 8 | -4 | -4 | 326.73 | 7.65  |

## CIF 31

|   |    |    |         |       |
|---|----|----|---------|-------|
| 8 | -4 | -4 | 322.69  | 7.45  |
| 8 | -4 | -4 | 349.82  | 8.23  |
| 8 | -4 | -4 | 286.37  | 6.77  |
| 8 | -4 | -4 | 303.13  | 7.60  |
| 8 | -4 | -4 | 310.31  | 8.25  |
| 8 | -4 | -4 | 320.16  | 6.55  |
| 8 | -4 | -4 | 317.46  | 6.97  |
| 8 | -4 | -4 | 324.17  | 7.56  |
| 8 | -4 | -3 | 1079.98 | 16.38 |
| 8 | -4 | -3 | 1206.08 | 16.82 |
| 8 | -4 | -3 | 1136.03 | 16.24 |
| 8 | -4 | -3 | 1204.10 | 16.19 |
| 8 | -4 | -3 | 1070.08 | 15.00 |
| 8 | -4 | -3 | 1176.63 | 16.66 |
| 8 | -4 | -3 | 1143.96 | 17.60 |
| 8 | -4 | -3 | 1167.13 | 15.12 |
| 8 | -4 | -3 | 1164.21 | 15.23 |
| 8 | -4 | -3 | 1179.49 | 16.02 |
| 8 | -4 | -2 | 23.84   | 2.24  |
| 8 | -4 | -2 | 23.65   | 2.16  |
| 8 | -4 | -2 | 21.68   | 1.77  |
| 8 | -4 | -2 | 24.09   | 2.08  |
| 8 | -4 | -2 | 23.57   | 1.92  |
| 8 | -4 | -2 | 23.23   | 1.78  |
| 8 | -4 | -2 | 24.50   | 1.93  |
| 8 | -4 | -1 | 1114.59 | 16.35 |
| 8 | -4 | -1 | 1153.87 | 15.85 |
| 8 | -4 | -1 | 1035.25 | 14.20 |
| 8 | -4 | -1 | 1029.09 | 15.45 |
| 8 | -4 | -1 | 1227.08 | 15.83 |
| 8 | -4 | -1 | 1136.36 | 14.57 |
| 8 | -4 | 0  | 11.43   | 1.62  |
| 8 | -4 | 0  | 13.93   | 1.63  |
| 8 | -4 | 0  | 9.75    | 1.20  |
| 8 | -4 | 0  | 10.71   | 1.53  |
| 8 | -4 | 0  | 13.33   | 1.62  |
| 8 | -4 | 1  | 159.50  | 4.90  |
| 8 | -4 | 1  | 147.62  | 4.26  |
| 8 | -4 | 1  | 157.17  | 5.11  |
| 8 | -4 | 2  | 14.95   | 1.77  |
| 8 | -4 | 2  | 14.94   | 1.56  |

## CIF 31

|   |    |     |        |      |
|---|----|-----|--------|------|
| 8 | -4 | 2   | 16.03  | 1.71 |
| 8 | -4 | 3   | 96.73  | 4.09 |
| 8 | -4 | 3   | 96.06  | 3.86 |
| 8 | -4 | 4   | 492.50 | 9.37 |
| 8 | -4 | 4   | 464.01 | 9.24 |
| 8 | -4 | 5   | 73.68  | 3.26 |
| 8 | -3 | -14 | 5.93   | 0.55 |
| 8 | -3 | -13 | 51.70  | 2.45 |
| 8 | -3 | -13 | 66.43  | 2.80 |
| 8 | -3 | -12 | 174.42 | 5.18 |
| 8 | -3 | -12 | 156.02 | 5.08 |
| 8 | -3 | -11 | 28.08  | 2.32 |
| 8 | -3 | -11 | 32.04  | 2.54 |
| 8 | -3 | -11 | 28.84  | 2.50 |
| 8 | -3 | -11 | 23.54  | 2.31 |
| 8 | -3 | -10 | 0.77   | 0.91 |
| 8 | -3 | -10 | 1.17   | 1.20 |
| 8 | -3 | -10 | 1.34   | 0.87 |
| 8 | -3 | -10 | 0.87   | 1.01 |
| 8 | -3 | -10 | 1.34   | 1.34 |
| 8 | -3 | -10 | 1.09   | 0.98 |
| 8 | -3 | -10 | 3.85   | 1.10 |
| 8 | -3 | -10 | 0.80   | 1.06 |
| 8 | -3 | -9  | 104.06 | 4.49 |
| 8 | -3 | -9  | 105.11 | 4.78 |
| 8 | -3 | -9  | 113.15 | 4.45 |
| 8 | -3 | -9  | 112.24 | 4.55 |
| 8 | -3 | -9  | 106.19 | 4.72 |
| 8 | -3 | -9  | 100.61 | 4.29 |
| 8 | -3 | -9  | 91.12  | 4.41 |
| 8 | -3 | -9  | 106.82 | 4.40 |
| 8 | -3 | -9  | 108.87 | 4.70 |
| 8 | -3 | -8  | 229.39 | 6.80 |
| 8 | -3 | -8  | 239.72 | 6.39 |
| 8 | -3 | -8  | 268.01 | 7.69 |
| 8 | -3 | -8  | 240.92 | 6.70 |
| 8 | -3 | -8  | 253.66 | 7.02 |
| 8 | -3 | -8  | 257.08 | 7.35 |
| 8 | -3 | -8  | 248.90 | 6.33 |
| 8 | -3 | -8  | 241.08 | 6.61 |
| 8 | -3 | -8  | 233.75 | 6.92 |

## CIF 31

|   |    |    |        |       |
|---|----|----|--------|-------|
| 8 | -3 | -8 | 240.70 | 6.94  |
| 8 | -3 | -8 | 220.93 | 6.01  |
| 8 | -3 | -7 | 445.68 | 9.56  |
| 8 | -3 | -7 | 430.99 | 10.13 |
| 8 | -3 | -7 | 472.95 | 10.38 |
| 8 | -3 | -7 | 516.89 | 10.24 |
| 8 | -3 | -7 | 479.02 | 10.08 |
| 8 | -3 | -7 | 500.75 | 9.70  |
| 8 | -3 | -7 | 480.54 | 10.11 |
| 8 | -3 | -7 | 520.96 | 10.69 |
| 8 | -3 | -7 | 445.90 | 9.11  |
| 8 | -3 | -7 | 508.51 | 10.43 |
| 8 | -3 | -7 | 458.48 | 9.80  |
| 8 | -3 | -7 | 490.24 | 10.27 |
| 8 | -3 | -7 | 470.32 | 8.99  |
| 8 | -3 | -7 | 474.12 | 10.15 |
| 8 | -3 | -6 | 93.25  | 3.47  |
| 8 | -3 | -6 | 68.04  | 5.97  |
| 8 | -3 | -6 | 80.66  | 4.26  |
| 8 | -3 | -6 | 98.76  | 4.28  |
| 8 | -3 | -6 | 101.14 | 4.85  |
| 8 | -3 | -6 | 94.92  | 4.06  |
| 8 | -3 | -6 | 99.35  | 4.08  |
| 8 | -3 | -6 | 90.36  | 4.19  |
| 8 | -3 | -6 | 68.88  | 5.92  |
| 8 | -3 | -6 | 78.25  | 3.49  |
| 8 | -3 | -6 | 101.07 | 5.20  |
| 8 | -3 | -6 | 87.61  | 4.00  |
| 8 | -3 | -6 | 87.79  | 4.65  |
| 8 | -3 | -6 | 82.19  | 3.67  |
| 8 | -3 | -6 | 81.22  | 3.42  |
| 8 | -3 | -6 | 93.83  | 4.20  |
| 8 | -3 | -5 | 386.61 | 8.43  |
| 8 | -3 | -5 | 326.63 | 6.48  |
| 8 | -3 | -5 | 262.21 | 8.80  |
| 8 | -3 | -5 | 357.05 | 8.23  |
| 8 | -3 | -5 | 326.42 | 7.56  |
| 8 | -3 | -5 | 333.77 | 7.49  |
| 8 | -3 | -5 | 339.35 | 7.21  |
| 8 | -3 | -5 | 316.20 | 8.67  |
| 8 | -3 | -5 | 306.55 | 7.57  |

## CIF 31

|   |    |    |        |      |
|---|----|----|--------|------|
| 8 | -3 | -5 | 310.87 | 8.28 |
| 8 | -3 | -5 | 312.63 | 6.70 |
| 8 | -3 | -5 | 332.32 | 7.81 |
| 8 | -3 | -4 | 235.45 | 6.50 |
| 8 | -3 | -4 | 234.46 | 7.63 |
| 8 | -3 | -4 | 260.81 | 6.49 |
| 8 | -3 | -4 | 238.73 | 6.09 |
| 8 | -3 | -4 | 218.77 | 5.50 |
| 8 | -3 | -4 | 233.04 | 6.31 |
| 8 | -3 | -4 | 211.22 | 6.76 |
| 8 | -3 | -4 | 207.90 | 5.22 |
| 8 | -3 | -4 | 228.71 | 6.19 |
| 8 | -3 | -3 | 135.38 | 4.84 |
| 8 | -3 | -3 | 166.35 | 6.23 |
| 8 | -3 | -3 | 150.34 | 5.04 |
| 8 | -3 | -3 | 143.11 | 4.75 |
| 8 | -3 | -3 | 151.45 | 4.72 |
| 8 | -3 | -3 | 123.71 | 3.89 |
| 8 | -3 | -3 | 137.34 | 4.72 |
| 8 | -3 | -3 | 126.77 | 5.15 |
| 8 | -3 | -3 | 142.72 | 4.10 |
| 8 | -3 | -3 | 145.41 | 4.66 |
| 8 | -3 | -2 | 117.14 | 4.47 |
| 8 | -3 | -2 | 126.63 | 4.60 |
| 8 | -3 | -2 | 122.61 | 4.13 |
| 8 | -3 | -2 | 110.80 | 4.18 |
| 8 | -3 | -2 | 113.45 | 3.88 |
| 8 | -3 | -1 | 39.23  | 2.61 |
| 8 | -3 | -1 | 41.42  | 2.67 |
| 8 | -3 | -1 | 35.57  | 2.39 |
| 8 | -3 | 0  | 2.09   | 0.95 |
| 8 | -3 | 0  | 1.28   | 0.96 |
| 8 | -3 | 0  | 1.83   | 0.79 |
| 8 | -3 | 1  | 82.22  | 3.67 |
| 8 | -3 | 1  | 88.81  | 3.73 |
| 8 | -3 | 1  | 85.35  | 3.48 |
| 8 | -3 | 2  | 32.69  | 2.35 |
| 8 | -3 | 2  | 32.23  | 2.28 |
| 8 | -3 | 2  | 33.61  | 2.19 |
| 8 | -3 | 3  | 136.82 | 4.66 |
| 8 | -3 | 3  | 173.53 | 5.34 |

## CIF 31

|   |    |     |        |      |
|---|----|-----|--------|------|
| 8 | -3 | 4   | 0.31   | 0.72 |
| 8 | -2 | -14 | 141.50 | 3.59 |
| 8 | -2 | -14 | 154.04 | 4.17 |
| 8 | -2 | -13 | 2.42   | 0.97 |
| 8 | -2 | -13 | 1.12   | 0.93 |
| 8 | -2 | -13 | 0.86   | 0.90 |
| 8 | -2 | -12 | 7.66   | 1.48 |
| 8 | -2 | -12 | 9.58   | 1.57 |
| 8 | -2 | -12 | 7.12   | 1.36 |
| 8 | -2 | -12 | 8.11   | 1.22 |
| 8 | -2 | -11 | 346.00 | 8.33 |
| 8 | -2 | -11 | 349.56 | 7.88 |
| 8 | -2 | -11 | 366.78 | 8.65 |
| 8 | -2 | -11 | 359.12 | 8.52 |
| 8 | -2 | -11 | 357.76 | 8.02 |
| 8 | -2 | -10 | 24.17  | 2.02 |
| 8 | -2 | -10 | 29.51  | 2.72 |
| 8 | -2 | -10 | 24.80  | 2.33 |
| 8 | -2 | -10 | 29.53  | 2.53 |
| 8 | -2 | -10 | 27.92  | 2.46 |
| 8 | -2 | -10 | 26.65  | 2.31 |
| 8 | -2 | -9  | 26.12  | 2.61 |
| 8 | -2 | -9  | 25.93  | 2.19 |
| 8 | -2 | -9  | 27.63  | 2.47 |
| 8 | -2 | -9  | 27.26  | 2.47 |
| 8 | -2 | -9  | 25.48  | 2.23 |
| 8 | -2 | -9  | 24.18  | 2.13 |
| 8 | -2 | -9  | 25.73  | 2.38 |
| 8 | -2 | -9  | 21.09  | 2.23 |
| 8 | -2 | -9  | 23.49  | 2.47 |
| 8 | -2 | -8  | 38.99  | 2.85 |
| 8 | -2 | -8  | 40.24  | 2.56 |
| 8 | -2 | -8  | 40.03  | 2.77 |
| 8 | -2 | -8  | 42.20  | 3.21 |
| 8 | -2 | -8  | 42.05  | 2.80 |
| 8 | -2 | -8  | 41.36  | 3.00 |
| 8 | -2 | -8  | 40.24  | 2.82 |
| 8 | -2 | -8  | 46.74  | 3.12 |
| 8 | -2 | -8  | 39.30  | 2.57 |
| 8 | -2 | -8  | 35.19  | 2.68 |
| 8 | -2 | -8  | 39.95  | 2.96 |

## CIF 31

|   |    |    |         |       |
|---|----|----|---------|-------|
| 8 | -2 | -7 | 282.74  | 7.41  |
| 8 | -2 | -7 | 280.10  | 6.57  |
| 8 | -2 | -7 | 259.54  | 7.75  |
| 8 | -2 | -7 | 220.04  | 8.14  |
| 8 | -2 | -7 | 276.07  | 7.12  |
| 8 | -2 | -7 | 268.58  | 7.39  |
| 8 | -2 | -7 | 256.41  | 7.18  |
| 8 | -2 | -7 | 297.22  | 8.69  |
| 8 | -2 | -7 | 237.28  | 6.12  |
| 8 | -2 | -7 | 282.67  | 7.73  |
| 8 | -2 | -7 | 257.50  | 6.98  |
| 8 | -2 | -7 | 260.03  | 7.44  |
| 8 | -2 | -7 | 254.61  | 6.64  |
| 8 | -2 | -7 | 234.03  | 5.77  |
| 8 | -2 | -7 | 272.25  | 7.38  |
| 8 | -2 | -6 | 1897.66 | 23.90 |
| 8 | -2 | -6 | 2036.87 | 22.61 |
| 8 | -2 | -6 | 1641.54 | 24.93 |
| 8 | -2 | -6 | 2240.32 | 25.80 |
| 8 | -2 | -6 | 2190.99 | 24.80 |
| 8 | -2 | -6 | 1979.44 | 24.65 |
| 8 | -2 | -6 | 1844.34 | 22.69 |
| 8 | -2 | -6 | 1714.04 | 25.31 |
| 8 | -2 | -6 | 1938.41 | 22.28 |
| 8 | -2 | -6 | 2182.29 | 25.94 |
| 8 | -2 | -6 | 1888.68 | 23.37 |
| 8 | -2 | -6 | 2131.08 | 25.72 |
| 8 | -2 | -6 | 2016.81 | 24.03 |
| 8 | -2 | -6 | 1995.56 | 24.42 |
| 8 | -2 | -5 | 1.30    | 1.01  |
| 8 | -2 | -5 | -1.02   | 3.29  |
| 8 | -2 | -5 | 0.81    | 0.74  |
| 8 | -2 | -5 | 1.13    | 1.39  |
| 8 | -2 | -5 | 1.07    | 1.23  |
| 8 | -2 | -5 | 1.23    | 0.94  |
| 8 | -2 | -5 | 1.70    | 0.91  |
| 8 | -2 | -5 | 0.63    | 1.04  |
| 8 | -2 | -5 | 0.94    | 2.16  |
| 8 | -2 | -5 | 0.93    | 0.91  |
| 8 | -2 | -5 | 1.48    | 1.82  |
| 8 | -2 | -5 | 1.44    | 1.02  |

## CIF 31

|   |    |     |        |       |
|---|----|-----|--------|-------|
| 8 | -2 | -4  | 140.28 | 4.87  |
| 8 | -2 | -4  | 119.48 | 6.01  |
| 8 | -2 | -4  | 151.41 | 4.29  |
| 8 | -2 | -4  | 158.76 | 5.25  |
| 8 | -2 | -4  | 161.84 | 4.80  |
| 8 | -2 | -4  | 143.53 | 4.45  |
| 8 | -2 | -4  | 155.55 | 5.25  |
| 8 | -2 | -4  | 137.18 | 5.59  |
| 8 | -2 | -4  | 137.30 | 4.62  |
| 8 | -2 | -4  | 141.91 | 4.80  |
| 8 | -2 | -3  | 148.14 | 4.84  |
| 8 | -2 | -3  | 139.31 | 4.40  |
| 8 | -2 | -3  | 134.67 | 4.18  |
| 8 | -2 | -3  | 146.67 | 5.05  |
| 8 | -2 | -3  | 141.55 | 4.53  |
| 8 | -2 | -3  | 132.03 | 5.28  |
| 8 | -2 | -3  | 137.27 | 4.47  |
| 8 | -2 | -2  | 778.28 | 12.40 |
| 8 | -2 | -2  | 800.02 | 11.79 |
| 8 | -2 | -2  | 758.06 | 11.26 |
| 8 | -2 | -2  | 773.16 | 11.81 |
| 8 | -2 | -2  | 792.10 | 13.83 |
| 8 | -2 | -1  | 61.67  | 3.08  |
| 8 | -2 | -1  | 61.90  | 3.25  |
| 8 | -2 | -1  | 60.09  | 2.79  |
| 8 | -2 | -1  | 58.61  | 2.79  |
| 8 | -2 | 0   | 1.73   | 0.85  |
| 8 | -2 | 0   | 0.99   | 0.96  |
| 8 | -2 | 0   | 0.46   | 0.62  |
| 8 | -2 | 0   | 1.42   | 1.09  |
| 8 | -2 | 1   | 406.31 | 8.13  |
| 8 | -2 | 1   | 429.23 | 8.71  |
| 8 | -2 | 2   | 154.54 | 4.92  |
| 8 | -2 | 3   | 1.67   | 0.87  |
| 8 | -2 | 4   | 90.03  | 3.69  |
| 8 | -2 | 5   | 206.55 | 6.36  |
| 8 | -1 | -14 | 18.59  | 1.53  |
| 8 | -1 | -14 | 15.36  | 1.24  |
| 8 | -1 | -14 | 16.76  | 1.44  |
| 8 | -1 | -13 | 65.39  | 3.22  |
| 8 | -1 | -13 | 63.82  | 3.18  |



## CIF 31

|   |    |     |        |       |
|---|----|-----|--------|-------|
| 8 | -1 | -13 | 59.63  | 3.03  |
| 8 | -1 | -12 | 721.67 | 12.33 |
| 8 | -1 | -12 | 724.99 | 12.10 |
| 8 | -1 | -11 | 1.90   | 1.04  |
| 8 | -1 | -11 | 0.70   | 1.19  |
| 8 | -1 | -11 | 0.60   | 1.07  |
| 8 | -1 | -11 | 0.81   | 1.10  |
| 8 | -1 | -11 | 0.27   | 0.87  |
| 8 | -1 | -11 | -0.11  | 0.88  |
| 8 | -1 | -10 | 251.11 | 7.14  |
| 8 | -1 | -10 | 264.71 | 6.83  |
| 8 | -1 | -10 | 255.46 | 7.16  |
| 8 | -1 | -10 | 257.29 | 7.15  |
| 8 | -1 | -10 | 242.45 | 6.99  |
| 8 | -1 | -10 | 255.15 | 7.27  |
| 8 | -1 | -9  | 71.28  | 3.75  |
| 8 | -1 | -9  | 74.33  | 3.55  |
| 8 | -1 | -9  | 71.76  | 3.46  |
| 8 | -1 | -9  | 75.13  | 3.84  |
| 8 | -1 | -9  | 72.04  | 3.42  |
| 8 | -1 | -9  | 73.41  | 3.84  |
| 8 | -1 | -9  | 68.89  | 3.37  |
| 8 | -1 | -9  | 70.41  | 3.68  |
| 8 | -1 | -9  | 69.74  | 3.79  |
| 8 | -1 | -9  | 68.34  | 3.83  |
| 8 | -1 | -8  | 15.02  | 1.85  |
| 8 | -1 | -8  | 19.75  | 2.01  |
| 8 | -1 | -8  | 14.29  | 2.02  |
| 8 | -1 | -8  | 11.29  | 1.95  |
| 8 | -1 | -8  | 14.72  | 2.65  |
| 8 | -1 | -8  | 14.91  | 1.77  |
| 8 | -1 | -8  | 15.86  | 2.07  |
| 8 | -1 | -8  | 14.07  | 2.77  |
| 8 | -1 | -8  | 11.40  | 1.67  |
| 8 | -1 | -8  | 16.24  | 2.22  |
| 8 | -1 | -8  | 13.83  | 1.77  |
| 8 | -1 | -8  | 14.03  | 1.97  |
| 8 | -1 | -8  | 15.25  | 1.74  |
| 8 | -1 | -7  | 96.39  | 4.23  |
| 8 | -1 | -7  | 95.54  | 3.93  |
| 8 | -1 | -7  | 99.32  | 5.59  |

## CIF 31

|   |    |    |        |       |
|---|----|----|--------|-------|
| 8 | -1 | -7 | 94.73  | 6.21  |
| 8 | -1 | -7 | 95.57  | 4.14  |
| 8 | -1 | -7 | 102.36 | 4.18  |
| 8 | -1 | -7 | 122.89 | 6.21  |
| 8 | -1 | -7 | 112.56 | 4.86  |
| 8 | -1 | -7 | 107.15 | 4.88  |
| 8 | -1 | -7 | 100.51 | 4.51  |
| 8 | -1 | -7 | 91.52  | 4.00  |
| 8 | -1 | -7 | 108.81 | 4.81  |
| 8 | -1 | -7 | 103.80 | 4.50  |
| 8 | -1 | -7 | 99.80  | 4.45  |
| 8 | -1 | -6 | 88.37  | 3.94  |
| 8 | -1 | -6 | 94.14  | 3.80  |
| 8 | -1 | -6 | 81.35  | 6.30  |
| 8 | -1 | -6 | 92.56  | 4.30  |
| 8 | -1 | -6 | 99.71  | 4.17  |
| 8 | -1 | -6 | 96.27  | 4.45  |
| 8 | -1 | -6 | 85.55  | 3.76  |
| 8 | -1 | -6 | 93.62  | 4.16  |
| 8 | -1 | -6 | 88.75  | 6.72  |
| 8 | -1 | -6 | 104.17 | 5.10  |
| 8 | -1 | -6 | 84.64  | 3.64  |
| 8 | -1 | -6 | 80.17  | 4.08  |
| 8 | -1 | -6 | 89.28  | 4.07  |
| 8 | -1 | -5 | 566.61 | 10.30 |
| 8 | -1 | -5 | 474.56 | 12.74 |
| 8 | -1 | -5 | 551.84 | 9.64  |
| 8 | -1 | -5 | 605.05 | 11.27 |
| 8 | -1 | -5 | 604.39 | 10.85 |
| 8 | -1 | -5 | 532.97 | 10.77 |
| 8 | -1 | -5 | 609.01 | 10.97 |
| 8 | -1 | -5 | 552.70 | 11.65 |
| 8 | -1 | -5 | 480.37 | 9.22  |
| 8 | -1 | -5 | 518.72 | 11.12 |
| 8 | -1 | -5 | 567.27 | 11.20 |
| 8 | -1 | -4 | 668.48 | 11.26 |
| 8 | -1 | -4 | 553.18 | 13.46 |
| 8 | -1 | -4 | 672.40 | 10.59 |
| 8 | -1 | -4 | 742.24 | 12.24 |
| 8 | -1 | -4 | 728.58 | 12.37 |
| 8 | -1 | -4 | 673.12 | 10.25 |

## CIF 31

|   |    |     |         |       |
|---|----|-----|---------|-------|
| 8 | -1 | -4  | 733.48  | 12.07 |
| 8 | -1 | -4  | 619.84  | 10.35 |
| 8 | -1 | -4  | 690.05  | 12.74 |
| 8 | -1 | -3  | 236.33  | 6.15  |
| 8 | -1 | -3  | 242.43  | 8.42  |
| 8 | -1 | -3  | 246.66  | 5.68  |
| 8 | -1 | -3  | 263.42  | 6.97  |
| 8 | -1 | -3  | 271.33  | 6.82  |
| 8 | -1 | -3  | 235.79  | 7.34  |
| 8 | -1 | -3  | 223.70  | 5.46  |
| 8 | -1 | -3  | 218.83  | 6.85  |
| 8 | -1 | -2  | 6.45    | 1.11  |
| 8 | -1 | -2  | 4.98    | 1.00  |
| 8 | -1 | -2  | 5.56    | 1.24  |
| 8 | -1 | -2  | 5.70    | 1.44  |
| 8 | -1 | -1  | 1118.14 | 14.98 |
| 8 | -1 | -1  | 1346.85 | 21.04 |
| 8 | -1 | -1  | 1256.96 | 17.06 |
| 8 | -1 | -1  | 1165.28 | 15.93 |
| 8 | -1 | -1  | 1060.04 | 16.83 |
| 8 | -1 | 0   | 573.84  | 10.49 |
| 8 | -1 | 0   | 572.87  | 9.85  |
| 8 | -1 | 1   | 182.70  | 5.61  |
| 8 | -1 | 1   | 169.61  | 4.85  |
| 8 | -1 | 1   | 164.22  | 5.51  |
| 8 | -1 | 2   | 332.72  | 9.06  |
| 8 | -1 | 2   | 293.04  | 6.99  |
| 8 | -1 | 3   | 162.57  | 6.31  |
| 8 | -1 | 3   | 140.33  | 4.59  |
| 8 | -1 | 4   | 13.17   | 1.81  |
| 8 | 0  | -14 | 1.36    | 0.80  |
| 8 | 0  | -14 | 1.22    | 0.69  |
| 8 | 0  | -14 | 1.53    | 0.63  |
| 8 | 0  | -13 | 9.63    | 1.49  |
| 8 | 0  | -13 | 9.65    | 1.52  |
| 8 | 0  | -13 | 7.63    | 1.28  |
| 8 | 0  | -13 | 7.73    | 1.22  |
| 8 | 0  | -12 | 41.55   | 2.58  |
| 8 | 0  | -12 | 48.63   | 3.34  |
| 8 | 0  | -12 | 44.99   | 2.83  |
| 8 | 0  | -11 | 4.48    | 1.17  |

## CIF 31

|   |   |     |         |       |
|---|---|-----|---------|-------|
| 8 | 0 | -11 | 4.14    | 1.49  |
| 8 | 0 | -11 | 5.13    | 1.42  |
| 8 | 0 | -11 | 4.67    | 1.25  |
| 8 | 0 | -11 | 3.13    | 1.03  |
| 8 | 0 | -11 | 3.32    | 1.25  |
| 8 | 0 | -10 | 389.65  | 8.91  |
| 8 | 0 | -10 | 433.04  | 8.74  |
| 8 | 0 | -10 | 369.81  | 8.09  |
| 8 | 0 | -10 | 417.55  | 8.96  |
| 8 | 0 | -10 | 390.08  | 9.40  |
| 8 | 0 | -10 | 330.66  | 8.45  |
| 8 | 0 | -10 | 400.31  | 8.25  |
| 8 | 0 | -10 | 376.83  | 8.48  |
| 8 | 0 | -10 | 364.05  | 8.46  |
| 8 | 0 | -10 | 371.67  | 9.05  |
| 8 | 0 | -9  | 311.25  | 8.03  |
| 8 | 0 | -9  | 362.81  | 8.17  |
| 8 | 0 | -9  | 343.22  | 8.12  |
| 8 | 0 | -9  | 362.74  | 8.69  |
| 8 | 0 | -9  | 355.39  | 9.14  |
| 8 | 0 | -9  | 362.54  | 8.42  |
| 8 | 0 | -9  | 362.43  | 8.10  |
| 8 | 0 | -9  | 324.17  | 7.88  |
| 8 | 0 | -9  | 378.33  | 9.18  |
| 8 | 0 | -9  | 343.77  | 7.78  |
| 8 | 0 | -8  | 698.13  | 12.64 |
| 8 | 0 | -8  | 838.41  | 13.05 |
| 8 | 0 | -8  | 781.13  | 13.74 |
| 8 | 0 | -8  | 826.90  | 14.15 |
| 8 | 0 | -8  | 766.81  | 13.71 |
| 8 | 0 | -8  | 795.49  | 12.56 |
| 8 | 0 | -8  | 764.88  | 13.44 |
| 8 | 0 | -8  | 781.46  | 13.71 |
| 8 | 0 | -8  | 708.69  | 11.95 |
| 8 | 0 | -8  | 909.49  | 14.76 |
| 8 | 0 | -8  | 746.09  | 12.35 |
| 8 | 0 | -8  | 739.56  | 12.53 |
| 8 | 0 | -8  | 737.16  | 12.74 |
| 8 | 0 | -7  | 969.63  | 14.60 |
| 8 | 0 | -7  | 1006.61 | 14.54 |
| 8 | 0 | -7  | 993.75  | 16.74 |

## CIF 31

|   |   |    |         |       |
|---|---|----|---------|-------|
| 8 | 0 | -7 | 988.28  | 16.34 |
| 8 | 0 | -7 | 976.33  | 15.42 |
| 8 | 0 | -7 | 950.42  | 14.33 |
| 8 | 0 | -7 | 1016.43 | 15.43 |
| 8 | 0 | -7 | 880.19  | 13.38 |
| 8 | 0 | -7 | 976.50  | 16.32 |
| 8 | 0 | -7 | 983.38  | 15.90 |
| 8 | 0 | -7 | 935.52  | 14.94 |
| 8 | 0 | -7 | 844.56  | 13.53 |
| 8 | 0 | -7 | 802.17  | 14.74 |
| 8 | 0 | -7 | 918.63  | 14.87 |
| 8 | 0 | -6 | 77.89   | 3.61  |
| 8 | 0 | -6 | 95.91   | 3.99  |
| 8 | 0 | -6 | 93.82   | 6.69  |
| 8 | 0 | -6 | 75.80   | 3.88  |
| 8 | 0 | -6 | 97.72   | 4.09  |
| 8 | 0 | -6 | 92.40   | 4.19  |
| 8 | 0 | -6 | 97.97   | 6.30  |
| 8 | 0 | -6 | 90.96   | 3.65  |
| 8 | 0 | -6 | 80.99   | 4.25  |
| 8 | 0 | -6 | 85.43   | 4.34  |
| 8 | 0 | -5 | 747.70  | 12.05 |
| 8 | 0 | -5 | 590.26  | 14.17 |
| 8 | 0 | -5 | 738.35  | 11.91 |
| 8 | 0 | -5 | 772.66  | 12.89 |
| 8 | 0 | -5 | 822.24  | 12.92 |
| 8 | 0 | -5 | 787.30  | 13.20 |
| 8 | 0 | -5 | 796.72  | 12.77 |
| 8 | 0 | -5 | 636.58  | 14.37 |
| 8 | 0 | -5 | 820.90  | 14.47 |
| 8 | 0 | -5 | 807.00  | 13.74 |
| 8 | 0 | -5 | 806.30  | 13.91 |
| 8 | 0 | -4 | 255.27  | 6.16  |
| 8 | 0 | -4 | 277.58  | 6.51  |
| 8 | 0 | -4 | 250.67  | 6.70  |
| 8 | 0 | -4 | 285.17  | 7.20  |
| 8 | 0 | -4 | 268.95  | 7.05  |
| 8 | 0 | -4 | 257.09  | 6.63  |
| 8 | 0 | -4 | 263.52  | 7.77  |
| 8 | 0 | -4 | 252.21  | 7.20  |
| 8 | 0 | -4 | 250.94  | 7.38  |

## CIF 31

|   |   |     |        |      |
|---|---|-----|--------|------|
| 8 | 0 | -3  | 235.24 | 5.73 |
| 8 | 0 | -3  | 244.26 | 5.98 |
| 8 | 0 | -3  | 230.41 | 6.27 |
| 8 | 0 | -3  | 274.51 | 7.05 |
| 8 | 0 | -3  | 264.10 | 6.46 |
| 8 | 0 | -3  | 240.57 | 7.39 |
| 8 | 0 | -3  | 262.49 | 7.15 |
| 8 | 0 | -2  | 108.99 | 5.78 |
| 8 | 0 | -2  | 140.53 | 4.33 |
| 8 | 0 | -2  | 115.58 | 4.21 |
| 8 | 0 | -2  | 139.45 | 4.44 |
| 8 | 0 | -2  | 120.62 | 5.17 |
| 8 | 0 | -2  | 126.80 | 4.83 |
| 8 | 0 | -1  | 114.25 | 5.97 |
| 8 | 0 | -1  | 120.51 | 3.94 |
| 8 | 0 | -1  | 129.51 | 4.81 |
| 8 | 0 | -1  | 120.32 | 3.96 |
| 8 | 0 | -1  | 123.81 | 5.05 |
| 8 | 0 | -1  | 128.80 | 4.78 |
| 8 | 0 | 0   | 0.93   | 1.35 |
| 8 | 0 | 0   | 1.11   | 0.99 |
| 8 | 0 | 0   | 0.80   | 0.93 |
| 8 | 0 | 0   | 2.22   | 0.88 |
| 8 | 0 | 1   | 2.75   | 1.45 |
| 8 | 0 | 1   | 2.94   | 1.10 |
| 8 | 0 | 1   | 2.60   | 1.05 |
| 8 | 0 | 2   | 91.81  | 4.91 |
| 8 | 0 | 2   | 128.89 | 4.58 |
| 8 | 0 | 3   | 1.18   | 0.82 |
| 8 | 1 | -14 | 39.89  | 2.00 |
| 8 | 1 | -13 | 32.78  | 2.31 |
| 8 | 1 | -13 | 35.11  | 2.09 |
| 8 | 1 | -13 | 30.68  | 2.34 |
| 8 | 1 | -13 | 25.20  | 1.64 |
| 8 | 1 | -13 | 31.11  | 2.13 |
| 8 | 1 | -12 | 57.96  | 3.31 |
| 8 | 1 | -12 | 64.06  | 3.25 |
| 8 | 1 | -12 | 62.72  | 3.62 |
| 8 | 1 | -12 | 55.02  | 2.69 |
| 8 | 1 | -12 | 58.91  | 3.23 |
| 8 | 1 | -11 | 6.30   | 1.21 |

## CIF 31

|   |   |     |        |       |
|---|---|-----|--------|-------|
| 8 | 1 | -11 | 9.72   | 1.70  |
| 8 | 1 | -11 | 12.04  | 2.14  |
| 8 | 1 | -11 | 10.37  | 1.45  |
| 8 | 1 | -11 | 6.32   | 1.18  |
| 8 | 1 | -11 | 8.40   | 1.58  |
| 8 | 1 | -10 | 10.28  | 1.52  |
| 8 | 1 | -10 | 15.42  | 1.79  |
| 8 | 1 | -10 | 14.26  | 1.74  |
| 8 | 1 | -10 | 14.05  | 1.92  |
| 8 | 1 | -10 | 12.10  | 1.84  |
| 8 | 1 | -10 | 12.44  | 1.86  |
| 8 | 1 | -10 | 12.22  | 1.75  |
| 8 | 1 | -10 | 11.79  | 1.53  |
| 8 | 1 | -10 | 10.58  | 1.44  |
| 8 | 1 | -9  | 100.19 | 4.25  |
| 8 | 1 | -9  | 112.49 | 4.41  |
| 8 | 1 | -9  | 98.58  | 4.36  |
| 8 | 1 | -9  | 110.50 | 4.77  |
| 8 | 1 | -9  | 95.64  | 4.48  |
| 8 | 1 | -9  | 123.76 | 5.86  |
| 8 | 1 | -9  | 102.88 | 4.54  |
| 8 | 1 | -9  | 104.77 | 4.50  |
| 8 | 1 | -9  | 90.05  | 3.81  |
| 8 | 1 | -9  | 101.87 | 4.26  |
| 8 | 1 | -8  | 507.62 | 10.09 |
| 8 | 1 | -8  | 577.25 | 10.79 |
| 8 | 1 | -8  | 552.68 | 11.33 |
| 8 | 1 | -8  | 598.35 | 11.69 |
| 8 | 1 | -8  | 547.90 | 11.19 |
| 8 | 1 | -8  | 606.14 | 13.26 |
| 8 | 1 | -8  | 605.88 | 11.40 |
| 8 | 1 | -8  | 587.95 | 11.78 |
| 8 | 1 | -8  | 628.47 | 12.20 |
| 8 | 1 | -8  | 564.95 | 10.72 |
| 8 | 1 | -8  | 589.64 | 10.11 |
| 8 | 1 | -8  | 544.91 | 11.48 |
| 8 | 1 | -8  | 531.49 | 10.86 |
| 8 | 1 | -7  | 46.61  | 2.73  |
| 8 | 1 | -7  | 45.86  | 2.89  |
| 8 | 1 | -7  | 52.60  | 3.79  |
| 8 | 1 | -7  | 56.10  | 4.29  |

## CIF 31

|   |   |    |        |       |
|---|---|----|--------|-------|
| 8 | 1 | -7 | 54.26  | 3.26  |
| 8 | 1 | -7 | 47.25  | 2.86  |
| 8 | 1 | -7 | 55.18  | 3.98  |
| 8 | 1 | -7 | 46.81  | 3.02  |
| 8 | 1 | -7 | 59.74  | 6.05  |
| 8 | 1 | -7 | 56.52  | 3.99  |
| 8 | 1 | -7 | 56.85  | 3.83  |
| 8 | 1 | -7 | 46.35  | 2.64  |
| 8 | 1 | -7 | 46.93  | 3.25  |
| 8 | 1 | -7 | 54.79  | 3.50  |
| 8 | 1 | -6 | 107.18 | 4.01  |
| 8 | 1 | -6 | 128.20 | 6.11  |
| 8 | 1 | -6 | 131.35 | 4.70  |
| 8 | 1 | -6 | 109.18 | 4.48  |
| 8 | 1 | -6 | 124.65 | 4.61  |
| 8 | 1 | -6 | 117.05 | 5.45  |
| 8 | 1 | -6 | 126.81 | 4.77  |
| 8 | 1 | -6 | 142.99 | 6.42  |
| 8 | 1 | -6 | 133.35 | 5.36  |
| 8 | 1 | -6 | 112.83 | 5.41  |
| 8 | 1 | -6 | 122.12 | 4.14  |
| 8 | 1 | -6 | 121.12 | 5.00  |
| 8 | 1 | -6 | 114.49 | 5.05  |
| 8 | 1 | -5 | 323.27 | 10.39 |
| 8 | 1 | -5 | 325.00 | 7.44  |
| 8 | 1 | -5 | 293.38 | 7.31  |
| 8 | 1 | -5 | 332.68 | 7.82  |
| 8 | 1 | -5 | 318.73 | 8.65  |
| 8 | 1 | -5 | 336.36 | 7.89  |
| 8 | 1 | -5 | 309.94 | 8.76  |
| 8 | 1 | -5 | 317.32 | 8.01  |
| 8 | 1 | -5 | 314.50 | 8.50  |
| 8 | 1 | -4 | 450.80 | 8.87  |
| 8 | 1 | -4 | 510.75 | 9.84  |
| 8 | 1 | -4 | 421.38 | 9.68  |
| 8 | 1 | -4 | 466.22 | 9.24  |
| 8 | 1 | -4 | 397.66 | 10.68 |
| 8 | 1 | -4 | 513.16 | 10.62 |
| 8 | 1 | -4 | 436.83 | 9.45  |
| 8 | 1 | -4 | 422.46 | 8.57  |
| 8 | 1 | -4 | 422.36 | 10.03 |



## CIF 31

|   |   |     |         |       |
|---|---|-----|---------|-------|
| 8 | 1 | -3  | 958.96  | 18.58 |
| 8 | 1 | -3  | 1055.36 | 14.74 |
| 8 | 1 | -3  | 1160.02 | 16.07 |
| 8 | 1 | -3  | 1055.05 | 14.70 |
| 8 | 1 | -3  | 1145.29 | 16.59 |
| 8 | 1 | -3  | 980.85  | 15.03 |
| 8 | 1 | -2  | 401.51  | 11.33 |
| 8 | 1 | -2  | 493.25  | 9.01  |
| 8 | 1 | -2  | 494.81  | 9.81  |
| 8 | 1 | -2  | 483.59  | 8.73  |
| 8 | 1 | -2  | 368.13  | 10.05 |
| 8 | 1 | -2  | 489.38  | 10.22 |
| 8 | 1 | -2  | 470.40  | 9.26  |
| 8 | 1 | -2  | 482.34  | 10.53 |
| 8 | 1 | -1  | 119.57  | 4.07  |
| 8 | 1 | -1  | 126.86  | 4.69  |
| 8 | 1 | -1  | 117.31  | 4.18  |
| 8 | 1 | -1  | 118.35  | 4.98  |
| 8 | 1 | 0   | 29.70   | 3.05  |
| 8 | 1 | 0   | 38.37   | 2.47  |
| 8 | 1 | 0   | 35.89   | 2.72  |
| 8 | 1 | 1   | 15.35   | 2.16  |
| 8 | 1 | 1   | 23.39   | 2.10  |
| 8 | 1 | 1   | 14.86   | 1.93  |
| 8 | 1 | 1   | 21.36   | 2.08  |
| 8 | 1 | 2   | 93.47   | 3.77  |
| 8 | 1 | 3   | 13.25   | 1.57  |
| 8 | 2 | -14 | 52.54   | 2.20  |
| 8 | 2 | -13 | 15.95   | 1.60  |
| 8 | 2 | -13 | 16.84   | 1.55  |
| 8 | 2 | -13 | 19.13   | 1.86  |
| 8 | 2 | -12 | 3.01    | 1.10  |
| 8 | 2 | -12 | 4.65    | 1.30  |
| 8 | 2 | -12 | 3.43    | 1.35  |
| 8 | 2 | -12 | 3.80    | 0.93  |
| 8 | 2 | -12 | 3.17    | 1.11  |
| 8 | 2 | -11 | 99.94   | 4.20  |
| 8 | 2 | -11 | 104.38  | 4.00  |
| 8 | 2 | -10 | 87.69   | 3.71  |
| 8 | 2 | -10 | 73.97   | 3.59  |
| 8 | 2 | -10 | 71.46   | 3.74  |

## CIF 31

|   |   |     |        |      |
|---|---|-----|--------|------|
| 8 | 2 | -10 | 62.47  | 3.45 |
| 8 | 2 | -10 | 56.66  | 3.90 |
| 8 | 2 | -10 | 74.63  | 3.73 |
| 8 | 2 | -10 | 73.36  | 3.81 |
| 8 | 2 | -10 | 70.03  | 3.36 |
| 8 | 2 | -9  | 34.27  | 2.48 |
| 8 | 2 | -9  | 35.36  | 2.68 |
| 8 | 2 | -9  | 34.57  | 2.74 |
| 8 | 2 | -9  | 27.11  | 2.33 |
| 8 | 2 | -9  | 29.10  | 3.01 |
| 8 | 2 | -9  | 32.54  | 2.52 |
| 8 | 2 | -9  | 29.40  | 2.60 |
| 8 | 2 | -9  | 25.70  | 2.13 |
| 8 | 2 | -9  | 30.34  | 2.57 |
| 8 | 2 | -9  | 31.46  | 2.45 |
| 8 | 2 | -8  | 12.10  | 1.68 |
| 8 | 2 | -8  | 11.61  | 1.79 |
| 8 | 2 | -8  | 12.13  | 1.74 |
| 8 | 2 | -8  | 12.99  | 2.15 |
| 8 | 2 | -8  | 11.82  | 1.71 |
| 8 | 2 | -8  | 12.34  | 2.17 |
| 8 | 2 | -8  | 11.47  | 1.68 |
| 8 | 2 | -8  | 11.55  | 1.52 |
| 8 | 2 | -8  | 11.34  | 1.48 |
| 8 | 2 | -8  | 12.59  | 1.80 |
| 8 | 2 | -8  | 12.27  | 1.74 |
| 8 | 2 | -7  | 49.83  | 3.04 |
| 8 | 2 | -7  | 52.62  | 3.53 |
| 8 | 2 | -7  | 54.81  | 3.59 |
| 8 | 2 | -7  | 44.13  | 2.80 |
| 8 | 2 | -7  | 52.79  | 3.82 |
| 8 | 2 | -7  | 49.53  | 2.96 |
| 8 | 2 | -7  | 56.77  | 4.62 |
| 8 | 2 | -7  | 52.66  | 3.16 |
| 8 | 2 | -7  | 50.39  | 3.49 |
| 8 | 2 | -7  | 52.73  | 2.87 |
| 8 | 2 | -7  | 46.92  | 3.13 |
| 8 | 2 | -7  | 48.58  | 3.21 |
| 8 | 2 | -6  | 296.17 | 7.30 |
| 8 | 2 | -6  | 319.13 | 8.36 |
| 8 | 2 | -6  | 249.54 | 6.47 |

## CIF 31

|   |   |    |        |       |
|---|---|----|--------|-------|
| 8 | 2 | -6 | 292.03 | 7.01  |
| 8 | 2 | -6 | 264.06 | 8.14  |
| 8 | 2 | -6 | 289.73 | 7.06  |
| 8 | 2 | -6 | 274.00 | 9.46  |
| 8 | 2 | -6 | 327.54 | 8.62  |
| 8 | 2 | -6 | 301.18 | 8.38  |
| 8 | 2 | -6 | 290.72 | 6.77  |
| 8 | 2 | -6 | 269.70 | 7.21  |
| 8 | 2 | -6 | 283.54 | 7.83  |
| 8 | 2 | -5 | 101.50 | 5.45  |
| 8 | 2 | -5 | 104.73 | 4.22  |
| 8 | 2 | -5 | 89.91  | 5.51  |
| 8 | 2 | -5 | 97.35  | 4.12  |
| 8 | 2 | -5 | 88.09  | 4.46  |
| 8 | 2 | -5 | 92.49  | 3.77  |
| 8 | 2 | -5 | 118.39 | 5.53  |
| 8 | 2 | -5 | 94.13  | 5.23  |
| 8 | 2 | -5 | 92.46  | 3.66  |
| 8 | 2 | -5 | 83.05  | 3.90  |
| 8 | 2 | -5 | 86.97  | 4.52  |
| 8 | 2 | -4 | 485.39 | 11.19 |
| 8 | 2 | -4 | 471.76 | 9.23  |
| 8 | 2 | -4 | 375.26 | 9.75  |
| 8 | 2 | -4 | 508.41 | 9.71  |
| 8 | 2 | -4 | 462.08 | 8.54  |
| 8 | 2 | -4 | 529.80 | 11.30 |
| 8 | 2 | -4 | 453.22 | 10.80 |
| 8 | 2 | -4 | 424.13 | 8.90  |
| 8 | 2 | -4 | 394.28 | 9.75  |
| 8 | 2 | -3 | 16.75  | 2.92  |
| 8 | 2 | -3 | 20.17  | 1.97  |
| 8 | 2 | -3 | 22.11  | 2.11  |
| 8 | 2 | -3 | 24.01  | 3.19  |
| 8 | 2 | -3 | 20.66  | 2.03  |
| 8 | 2 | -3 | 16.77  | 1.66  |
| 8 | 2 | -3 | 16.60  | 2.22  |
| 8 | 2 | -2 | 8.16   | 1.36  |
| 8 | 2 | -2 | 4.76   | 2.32  |
| 8 | 2 | -2 | 5.37   | 1.29  |
| 8 | 2 | -2 | 5.07   | 1.95  |
| 8 | 2 | -2 | 5.59   | 1.17  |

## CIF 31

|   |   |     |        |      |
|---|---|-----|--------|------|
| 8 | 2 | -2  | 7.60   | 2.02 |
| 8 | 2 | -2  | 4.70   | 1.48 |
| 8 | 2 | -1  | 92.45  | 4.86 |
| 8 | 2 | -1  | 84.74  | 3.50 |
| 8 | 2 | -1  | 84.98  | 3.91 |
| 8 | 2 | -1  | 86.90  | 4.30 |
| 8 | 2 | -1  | 78.86  | 4.31 |
| 8 | 2 | -1  | 85.49  | 4.06 |
| 8 | 2 | 0   | 12.65  | 2.01 |
| 8 | 2 | 0   | 13.26  | 1.47 |
| 8 | 2 | 0   | 14.50  | 1.89 |
| 8 | 2 | 0   | 10.19  | 1.89 |
| 8 | 2 | 0   | 11.60  | 1.56 |
| 8 | 2 | 1   | 64.37  | 3.55 |
| 8 | 2 | 1   | 65.75  | 3.08 |
| 8 | 2 | 2   | 9.32   | 1.46 |
| 8 | 2 | 3   | 4.31   | 0.91 |
| 8 | 3 | -13 | 7.42   | 0.97 |
| 8 | 3 | -13 | 10.79  | 1.24 |
| 8 | 3 | -12 | 37.21  | 2.17 |
| 8 | 3 | -12 | 40.96  | 2.51 |
| 8 | 3 | -12 | 39.60  | 2.76 |
| 8 | 3 | -12 | 41.26  | 2.17 |
| 8 | 3 | -12 | 33.52  | 2.22 |
| 8 | 3 | -11 | 6.88   | 1.19 |
| 8 | 3 | -11 | 9.03   | 1.43 |
| 8 | 3 | -11 | 6.80   | 1.29 |
| 8 | 3 | -11 | 6.78   | 1.10 |
| 8 | 3 | -10 | 58.11  | 3.14 |
| 8 | 3 | -10 | 49.62  | 2.69 |
| 8 | 3 | -10 | 45.32  | 3.30 |
| 8 | 3 | -10 | 57.98  | 3.21 |
| 8 | 3 | -10 | 52.08  | 3.03 |
| 8 | 3 | -10 | 53.42  | 2.92 |
| 8 | 3 | -9  | 334.32 | 7.43 |
| 8 | 3 | -9  | 298.41 | 7.61 |
| 8 | 3 | -9  | 310.84 | 7.74 |
| 8 | 3 | -9  | 263.91 | 6.48 |
| 8 | 3 | -9  | 305.42 | 8.66 |
| 8 | 3 | -9  | 303.33 | 6.40 |
| 8 | 3 | -9  | 344.03 | 8.26 |

## CIF 31

|   |   |    |        |      |
|---|---|----|--------|------|
| 8 | 3 | -9 | 312.02 | 7.23 |
| 8 | 3 | -9 | 302.82 | 7.60 |
| 8 | 3 | -9 | 303.01 | 7.57 |
| 8 | 3 | -8 | 128.79 | 4.28 |
| 8 | 3 | -8 | 128.35 | 4.61 |
| 8 | 3 | -8 | 122.74 | 4.90 |
| 8 | 3 | -8 | 128.18 | 5.01 |
| 8 | 3 | -8 | 118.09 | 5.39 |
| 8 | 3 | -8 | 127.48 | 4.50 |
| 8 | 3 | -8 | 129.72 | 5.16 |
| 8 | 3 | -8 | 125.60 | 4.87 |
| 8 | 3 | -8 | 122.57 | 4.38 |
| 8 | 3 | -8 | 120.89 | 4.30 |
| 8 | 3 | -8 | 126.92 | 4.75 |
| 8 | 3 | -8 | 124.14 | 4.89 |
| 8 | 3 | -7 | 150.33 | 5.04 |
| 8 | 3 | -7 | 152.51 | 5.39 |
| 8 | 3 | -7 | 116.20 | 5.29 |
| 8 | 3 | -7 | 138.61 | 4.46 |
| 8 | 3 | -7 | 135.44 | 5.55 |
| 8 | 3 | -7 | 136.64 | 5.30 |
| 8 | 3 | -7 | 154.93 | 5.29 |
| 8 | 3 | -7 | 147.17 | 4.70 |
| 8 | 3 | -7 | 121.19 | 4.63 |
| 8 | 3 | -7 | 140.55 | 5.38 |
| 8 | 3 | -6 | 85.72  | 3.82 |
| 8 | 3 | -6 | 86.51  | 4.20 |
| 8 | 3 | -6 | 85.93  | 4.05 |
| 8 | 3 | -6 | 74.96  | 4.18 |
| 8 | 3 | -6 | 77.92  | 3.19 |
| 8 | 3 | -6 | 91.55  | 4.43 |
| 8 | 3 | -6 | 87.77  | 4.26 |
| 8 | 3 | -6 | 89.02  | 3.63 |
| 8 | 3 | -6 | 77.73  | 3.61 |
| 8 | 3 | -6 | 77.24  | 4.08 |
| 8 | 3 | -5 | 98.08  | 4.64 |
| 8 | 3 | -5 | 109.31 | 4.29 |
| 8 | 3 | -5 | 96.56  | 4.28 |
| 8 | 3 | -5 | 95.57  | 3.90 |
| 8 | 3 | -5 | 108.28 | 5.93 |
| 8 | 3 | -5 | 104.27 | 4.66 |

## CIF 31

|   |   |     |        |      |
|---|---|-----|--------|------|
| 8 | 3 | -5  | 100.73 | 4.67 |
| 8 | 3 | -5  | 101.81 | 4.91 |
| 8 | 3 | -5  | 93.85  | 3.70 |
| 8 | 3 | -5  | 82.09  | 4.17 |
| 8 | 3 | -4  | 296.73 | 7.95 |
| 8 | 3 | -4  | 294.10 | 7.08 |
| 8 | 3 | -4  | 297.41 | 7.39 |
| 8 | 3 | -4  | 298.02 | 7.10 |
| 8 | 3 | -4  | 326.13 | 8.04 |
| 8 | 3 | -4  | 298.86 | 7.85 |
| 8 | 3 | -3  | 120.94 | 4.89 |
| 8 | 3 | -3  | 118.55 | 4.36 |
| 8 | 3 | -3  | 128.80 | 4.69 |
| 8 | 3 | -3  | 128.85 | 4.57 |
| 8 | 3 | -3  | 110.35 | 6.17 |
| 8 | 3 | -3  | 126.91 | 4.90 |
| 8 | 3 | -3  | 128.05 | 5.56 |
| 8 | 3 | -3  | 124.79 | 4.90 |
| 8 | 3 | -2  | 2.12   | 1.23 |
| 8 | 3 | -2  | 3.33   | 1.05 |
| 8 | 3 | -2  | 3.21   | 1.30 |
| 8 | 3 | -2  | 2.31   | 1.03 |
| 8 | 3 | -2  | 2.65   | 1.14 |
| 8 | 3 | -2  | 3.84   | 1.91 |
| 8 | 3 | -2  | 3.31   | 1.12 |
| 8 | 3 | -1  | 0.08   | 0.73 |
| 8 | 3 | -1  | 0.44   | 1.49 |
| 8 | 3 | -1  | 0.68   | 0.83 |
| 8 | 3 | 0   | 0.75   | 2.30 |
| 8 | 3 | 0   | 0.71   | 1.26 |
| 8 | 3 | 1   | 38.36  | 2.46 |
| 8 | 3 | 1   | 38.76  | 2.32 |
| 8 | 3 | 2   | 29.57  | 1.83 |
| 8 | 4 | -13 | 65.82  | 2.30 |
| 8 | 4 | -12 | 1.29   | 0.71 |
| 8 | 4 | -11 | 12.43  | 1.46 |
| 8 | 4 | -10 | 52.33  | 2.93 |
| 8 | 4 | -10 | 44.90  | 2.53 |
| 8 | 4 | -10 | 51.69  | 2.73 |
| 8 | 4 | -9  | 4.82   | 1.01 |
| 8 | 4 | -9  | 7.98   | 1.58 |

## CIF 31

|   |   |    |        |       |
|---|---|----|--------|-------|
| 8 | 4 | -9 | 5.97   | 1.15  |
| 8 | 4 | -9 | 4.65   | 1.04  |
| 8 | 4 | -9 | 4.89   | 1.16  |
| 8 | 4 | -8 | 10.02  | 1.35  |
| 8 | 4 | -8 | 9.68   | 1.48  |
| 8 | 4 | -8 | 10.77  | 1.66  |
| 8 | 4 | -8 | 10.64  | 1.47  |
| 8 | 4 | -8 | 10.49  | 1.55  |
| 8 | 4 | -8 | 9.45   | 1.35  |
| 8 | 4 | -8 | 7.80   | 1.25  |
| 8 | 4 | -8 | 10.75  | 1.60  |
| 8 | 4 | -7 | 222.67 | 5.94  |
| 8 | 4 | -7 | 221.83 | 5.85  |
| 8 | 4 | -7 | 207.31 | 6.14  |
| 8 | 4 | -7 | 220.58 | 5.97  |
| 8 | 4 | -7 | 228.55 | 5.84  |
| 8 | 4 | -7 | 226.21 | 6.14  |
| 8 | 4 | -7 | 178.09 | 5.98  |
| 8 | 4 | -7 | 209.45 | 6.23  |
| 8 | 4 | -7 | 243.02 | 6.31  |
| 8 | 4 | -7 | 182.43 | 5.92  |
| 8 | 4 | -6 | 733.50 | 11.62 |
| 8 | 4 | -6 | 678.55 | 12.01 |
| 8 | 4 | -6 | 720.79 | 11.63 |
| 8 | 4 | -6 | 712.65 | 12.58 |
| 8 | 4 | -6 | 707.71 | 12.68 |
| 8 | 4 | -6 | 759.80 | 12.67 |
| 8 | 4 | -6 | 674.91 | 12.14 |
| 8 | 4 | -5 | 166.04 | 5.02  |
| 8 | 4 | -5 | 144.09 | 4.97  |
| 8 | 4 | -5 | 153.26 | 4.73  |
| 8 | 4 | -5 | 146.14 | 5.24  |
| 8 | 4 | -5 | 133.87 | 5.20  |
| 8 | 4 | -5 | 167.19 | 5.60  |
| 8 | 4 | -5 | 147.35 | 5.21  |
| 8 | 4 | -4 | 60.68  | 3.15  |
| 8 | 4 | -4 | 67.80  | 3.18  |
| 8 | 4 | -4 | 64.86  | 2.90  |
| 8 | 4 | -4 | 65.22  | 3.52  |
| 8 | 4 | -4 | 61.27  | 3.56  |
| 8 | 4 | -4 | 68.67  | 3.68  |

## CIF 31

|   |   |     |        |      |
|---|---|-----|--------|------|
| 8 | 4 | -4  | 61.23  | 3.30 |
| 8 | 4 | -3  | 116.17 | 4.42 |
| 8 | 4 | -3  | 118.88 | 4.70 |
| 8 | 4 | -3  | 112.39 | 4.26 |
| 8 | 4 | -2  | 99.74  | 3.79 |
| 8 | 4 | -2  | 103.89 | 4.19 |
| 8 | 4 | -2  | 110.50 | 4.45 |
| 8 | 4 | -2  | 92.46  | 3.61 |
| 8 | 4 | -1  | 39.26  | 2.12 |
| 8 | 4 | -1  | 41.27  | 2.51 |
| 8 | 4 | -1  | 46.08  | 2.73 |
| 8 | 4 | 0   | 1.49   | 0.84 |
| 8 | 4 | 1   | 30.98  | 1.70 |
| 8 | 4 | 2   | -0.07  | 0.50 |
| 8 | 5 | -11 | 137.51 | 3.74 |
| 8 | 5 | -11 | 158.95 | 4.00 |
| 8 | 5 | -10 | 0.30   | 0.76 |
| 8 | 5 | -10 | 0.03   | 0.82 |
| 8 | 5 | -9  | 238.41 | 5.59 |
| 8 | 5 | -9  | 252.66 | 4.99 |
| 8 | 5 | -9  | 236.33 | 5.49 |
| 8 | 5 | -9  | 235.89 | 5.70 |
| 8 | 5 | -8  | 1.18   | 0.78 |
| 8 | 5 | -8  | 0.89   | 0.84 |
| 8 | 5 | -8  | 2.13   | 1.08 |
| 8 | 5 | -8  | 1.12   | 0.72 |
| 8 | 5 | -8  | 1.72   | 0.87 |
| 8 | 5 | -8  | 1.34   | 0.90 |
| 8 | 5 | -7  | 2.14   | 0.96 |
| 8 | 5 | -7  | 1.91   | 0.83 |
| 8 | 5 | -7  | 2.17   | 1.03 |
| 8 | 5 | -7  | 1.58   | 1.07 |
| 8 | 5 | -7  | 2.94   | 0.96 |
| 8 | 5 | -7  | 1.83   | 0.95 |
| 8 | 5 | -7  | 2.13   | 0.94 |
| 8 | 5 | -6  | 80.79  | 3.40 |
| 8 | 5 | -6  | 65.69  | 2.81 |
| 8 | 5 | -6  | 83.73  | 3.36 |
| 8 | 5 | -6  | 89.39  | 3.63 |
| 8 | 5 | -6  | 75.42  | 3.35 |
| 8 | 5 | -6  | 75.26  | 3.46 |



## CIF 31

|   |   |    |        |      |
|---|---|----|--------|------|
| 8 | 5 | -6 | 90.42  | 3.64 |
| 8 | 5 | -6 | 72.02  | 3.30 |
| 8 | 5 | -5 | 223.30 | 5.81 |
| 8 | 5 | -5 | 209.88 | 5.67 |
| 8 | 5 | -5 | 238.36 | 5.96 |
| 8 | 5 | -5 | 197.33 | 5.34 |
| 8 | 5 | -5 | 182.20 | 5.43 |
| 8 | 5 | -5 | 224.34 | 5.93 |
| 8 | 5 | -5 | 190.95 | 5.32 |
| 8 | 5 | -4 | 101.15 | 3.99 |
| 8 | 5 | -4 | 84.95  | 3.27 |
| 8 | 5 | -4 | 88.31  | 3.61 |
| 8 | 5 | -4 | 94.47  | 3.82 |
| 8 | 5 | -4 | 80.17  | 3.26 |
| 8 | 5 | -3 | 0.66   | 0.93 |
| 8 | 5 | -3 | 1.15   | 0.69 |
| 8 | 5 | -3 | 0.73   | 0.92 |
| 8 | 5 | -3 | 0.69   | 0.77 |
| 8 | 5 | -2 | 53.94  | 2.87 |
| 8 | 5 | -2 | 52.10  | 2.57 |
| 8 | 5 | -2 | 50.16  | 2.57 |
| 8 | 5 | -1 | 13.58  | 1.52 |
| 8 | 5 | -1 | 11.80  | 1.31 |
| 8 | 5 | -1 | 11.63  | 1.24 |
| 8 | 5 | -1 | 12.27  | 1.24 |
| 8 | 5 | 0  | 42.23  | 1.84 |
| 8 | 5 | 0  | 28.34  | 1.36 |
| 8 | 6 | -9 | 0.22   | 0.50 |
| 8 | 6 | -9 | 0.07   | 0.59 |
| 8 | 6 | -8 | 3.47   | 0.68 |
| 8 | 6 | -8 | 4.33   | 0.79 |
| 8 | 6 | -8 | 4.01   | 0.85 |
| 8 | 6 | -7 | 5.62   | 0.93 |
| 8 | 6 | -7 | 6.61   | 1.01 |
| 8 | 6 | -7 | 5.38   | 0.91 |
| 8 | 6 | -6 | 57.14  | 2.41 |
| 8 | 6 | -6 | 56.94  | 2.45 |
| 8 | 6 | -6 | 57.64  | 2.46 |
| 8 | 6 | -5 | 19.62  | 1.53 |
| 8 | 6 | -5 | 14.60  | 1.26 |
| 8 | 6 | -5 | 18.56  | 1.44 |

## CIF 31

|   |     |    |        |      |
|---|-----|----|--------|------|
| 8 | 6   | -5 | 17.77  | 1.51 |
| 8 | 6   | -5 | 17.52  | 1.44 |
| 8 | 6   | -4 | 174.71 | 4.22 |
| 8 | 6   | -4 | 161.73 | 4.06 |
| 8 | 6   | -4 | 164.00 | 4.05 |
| 8 | 6   | -3 | 58.88  | 2.33 |
| 8 | 6   | -3 | 62.58  | 2.31 |
| 8 | 6   | -2 | 64.70  | 2.15 |
| 8 | 6   | -2 | 63.20  | 2.28 |
| 9 | -12 | -1 | 39.52  | 1.45 |
| 9 | -12 | -1 | 47.02  | 1.45 |
| 9 | -12 | 0  | 55.69  | 1.75 |
| 9 | -12 | 1  | 2.41   | 0.52 |
| 9 | -12 | 1  | 3.69   | 0.52 |
| 9 | -11 | -5 | 0.87   | 0.45 |
| 9 | -11 | -4 | 6.31   | 0.77 |
| 9 | -11 | -4 | 7.89   | 0.89 |
| 9 | -11 | -4 | 5.95   | 0.60 |
| 9 | -11 | -4 | 6.71   | 0.86 |
| 9 | -11 | -3 | 58.99  | 2.17 |
| 9 | -11 | -3 | 60.14  | 2.29 |
| 9 | -11 | -3 | 59.83  | 1.98 |
| 9 | -11 | -3 | 59.41  | 2.25 |
| 9 | -11 | -2 | 1.05   | 0.62 |
| 9 | -11 | -2 | 0.61   | 0.57 |
| 9 | -11 | -2 | -0.12  | 0.57 |
| 9 | -11 | -2 | 1.01   | 0.61 |
| 9 | -11 | -2 | -0.18  | 0.67 |
| 9 | -11 | -1 | 303.01 | 5.24 |
| 9 | -11 | -1 | 291.77 | 5.35 |
| 9 | -11 | -1 | 300.38 | 5.40 |
| 9 | -11 | -1 | 298.72 | 5.65 |
| 9 | -11 | -1 | 315.76 | 5.36 |
| 9 | -11 | 0  | 14.40  | 1.24 |
| 9 | -11 | 0  | 14.67  | 1.23 |
| 9 | -11 | 0  | 14.15  | 1.18 |
| 9 | -11 | 0  | 13.32  | 1.24 |
| 9 | -11 | 0  | 14.87  | 1.34 |
| 9 | -11 | 1  | 92.16  | 2.89 |
| 9 | -11 | 1  | 92.76  | 2.90 |
| 9 | -11 | 1  | 88.10  | 2.80 |

## CIF 31

|       |    |        |      |
|-------|----|--------|------|
| 9 -11 | 1  | 91.32  | 2.94 |
| 9 -11 | 1  | 98.13  | 2.75 |
| 9 -11 | 2  | 213.17 | 4.46 |
| 9 -11 | 2  | 213.86 | 4.47 |
| 9 -11 | 2  | 209.11 | 4.29 |
| 9 -11 | 2  | 197.73 | 4.45 |
| 9 -11 | 3  | 26.51  | 1.73 |
| 9 -11 | 3  | 26.32  | 1.48 |
| 9 -11 | 3  | 26.66  | 1.42 |
| 9 -11 | 3  | 25.07  | 1.12 |
| 9 -11 | 4  | 21.33  | 1.46 |
| 9 -11 | 4  | 21.38  | 1.25 |
| 9 -11 | 4  | 22.38  | 1.17 |
| 9 -10 | -7 | 3.59   | 0.65 |
| 9 -10 | -6 | 78.78  | 2.42 |
| 9 -10 | -6 | 86.27  | 2.70 |
| 9 -10 | -5 | 33.99  | 1.83 |
| 9 -10 | -5 | 33.97  | 1.79 |
| 9 -10 | -5 | 33.04  | 1.92 |
| 9 -10 | -5 | 35.53  | 1.95 |
| 9 -10 | -5 | 30.20  | 1.41 |
| 9 -10 | -5 | 33.36  | 1.94 |
| 9 -10 | -4 | 1.00   | 0.67 |
| 9 -10 | -4 | 0.23   | 0.68 |
| 9 -10 | -4 | -0.28  | 0.62 |
| 9 -10 | -4 | 0.34   | 0.51 |
| 9 -10 | -4 | 0.17   | 0.66 |
| 9 -10 | -4 | 0.45   | 0.78 |
| 9 -10 | -3 | 2.06   | 0.88 |
| 9 -10 | -3 | 2.17   | 0.87 |
| 9 -10 | -3 | 2.08   | 0.79 |
| 9 -10 | -3 | 2.53   | 0.75 |
| 9 -10 | -3 | 1.94   | 0.85 |
| 9 -10 | -3 | 2.26   | 0.74 |
| 9 -10 | -3 | 1.87   | 0.89 |
| 9 -10 | -2 | 376.89 | 7.03 |
| 9 -10 | -2 | 369.23 | 6.95 |
| 9 -10 | -2 | 316.21 | 6.37 |
| 9 -10 | -2 | 310.35 | 6.13 |
| 9 -10 | -2 | 319.27 | 6.63 |
| 9 -10 | -2 | 338.94 | 6.92 |

## CIF 31

|   |     |    |        |      |
|---|-----|----|--------|------|
| 9 | -10 | -1 | 2.22   | 1.70 |
| 9 | -10 | -1 | 2.09   | 1.28 |
| 9 | -10 | -1 | 0.92   | 0.87 |
| 9 | -10 | -1 | 1.75   | 0.71 |
| 9 | -10 | -1 | 0.87   | 0.74 |
| 9 | -10 | 0  | 63.93  | 3.22 |
| 9 | -10 | 0  | 60.89  | 2.84 |
| 9 | -10 | 0  | 63.39  | 2.72 |
| 9 | -10 | 0  | 58.60  | 2.76 |
| 9 | -10 | 0  | 50.13  | 2.28 |
| 9 | -10 | 0  | 52.63  | 2.66 |
| 9 | -10 | 0  | 50.31  | 2.61 |
| 9 | -10 | 1  | 12.33  | 1.21 |
| 9 | -10 | 1  | 13.02  | 2.40 |
| 9 | -10 | 1  | 12.60  | 1.49 |
| 9 | -10 | 1  | 12.70  | 1.34 |
| 9 | -10 | 1  | 10.37  | 1.30 |
| 9 | -10 | 1  | 11.88  | 1.43 |
| 9 | -10 | 2  | 72.15  | 2.48 |
| 9 | -10 | 2  | 80.98  | 3.62 |
| 9 | -10 | 2  | 82.28  | 2.93 |
| 9 | -10 | 2  | 73.42  | 2.95 |
| 9 | -10 | 2  | 72.34  | 3.03 |
| 9 | -10 | 2  | 72.23  | 2.98 |
| 9 | -10 | 3  | 1.23   | 0.59 |
| 9 | -10 | 3  | 0.85   | 0.57 |
| 9 | -10 | 3  | 1.05   | 0.78 |
| 9 | -10 | 3  | 2.63   | 0.77 |
| 9 | -10 | 3  | 1.11   | 0.77 |
| 9 | -10 | 3  | 0.77   | 0.82 |
| 9 | -10 | 4  | 545.48 | 7.21 |
| 9 | -10 | 4  | 507.13 | 7.46 |
| 9 | -10 | 5  | 146.44 | 3.08 |
| 9 | -10 | 5  | 145.57 | 3.36 |
| 9 | -10 | 6  | 21.42  | 1.07 |
| 9 | -9  | -8 | 56.33  | 1.64 |
| 9 | -9  | -8 | 52.32  | 2.14 |
| 9 | -9  | -7 | 30.24  | 1.80 |
| 9 | -9  | -7 | 26.83  | 1.55 |
| 9 | -9  | -7 | 28.26  | 1.83 |
| 9 | -9  | -7 | 29.73  | 1.84 |

## CIF 31

|   |    |    |       |      |
|---|----|----|-------|------|
| 9 | -9 | -7 | 28.01 | 1.32 |
| 9 | -9 | -7 | 31.05 | 1.89 |
| 9 | -9 | -6 | 50.05 | 2.53 |
| 9 | -9 | -6 | 47.73 | 2.25 |
| 9 | -9 | -6 | 41.65 | 2.09 |
| 9 | -9 | -6 | 53.48 | 2.65 |
| 9 | -9 | -6 | 47.00 | 2.30 |
| 9 | -9 | -6 | 47.23 | 2.50 |
| 9 | -9 | -6 | 51.93 | 1.84 |
| 9 | -9 | -5 | 10.12 | 1.33 |
| 9 | -9 | -5 | 11.59 | 1.27 |
| 9 | -9 | -5 | 9.85  | 1.18 |
| 9 | -9 | -5 | 10.69 | 1.29 |
| 9 | -9 | -5 | 11.84 | 1.53 |
| 9 | -9 | -4 | 3.91  | 1.13 |
| 9 | -9 | -4 | 4.32  | 1.10 |
| 9 | -9 | -4 | 3.97  | 0.95 |
| 9 | -9 | -4 | 3.62  | 0.86 |
| 9 | -9 | -4 | 3.93  | 1.01 |
| 9 | -9 | -3 | 25.25 | 1.94 |
| 9 | -9 | -3 | 30.21 | 2.48 |
| 9 | -9 | -3 | 30.83 | 2.28 |
| 9 | -9 | -3 | 29.53 | 2.18 |
| 9 | -9 | -3 | 28.37 | 1.95 |
| 9 | -9 | -3 | 29.98 | 2.06 |
| 9 | -9 | -3 | 26.29 | 1.83 |
| 9 | -9 | -3 | 28.97 | 2.18 |
| 9 | -9 | -3 | 29.24 | 2.15 |
| 9 | -9 | -2 | 1.47  | 1.30 |
| 9 | -9 | -2 | 1.25  | 1.49 |
| 9 | -9 | -2 | 1.03  | 1.02 |
| 9 | -9 | -2 | 1.13  | 0.77 |
| 9 | -9 | -2 | 0.57  | 1.45 |
| 9 | -9 | -2 | 1.09  | 0.69 |
| 9 | -9 | -2 | 0.66  | 0.86 |
| 9 | -9 | -2 | 1.25  | 0.89 |
| 9 | -9 | -2 | 1.23  | 1.07 |
| 9 | -9 | -1 | 48.96 | 3.10 |
| 9 | -9 | -1 | 57.76 | 3.67 |
| 9 | -9 | -1 | 62.00 | 3.14 |
| 9 | -9 | -1 | 54.61 | 2.76 |

## CIF 31

|   |    |    |        |      |
|---|----|----|--------|------|
| 9 | -9 | -1 | 54.52  | 3.12 |
| 9 | -9 | -1 | 47.42  | 2.36 |
| 9 | -9 | -1 | 61.44  | 3.08 |
| 9 | -9 | -1 | 51.92  | 2.96 |
| 9 | -9 | -1 | 57.55  | 3.01 |
| 9 | -9 | 0  | 361.04 | 7.94 |
| 9 | -9 | 0  | 357.56 | 6.68 |
| 9 | -9 | 0  | 377.77 | 8.39 |
| 9 | -9 | 0  | 396.32 | 8.16 |
| 9 | -9 | 0  | 392.35 | 7.45 |
| 9 | -9 | 0  | 410.63 | 8.13 |
| 9 | -9 | 0  | 363.09 | 8.01 |
| 9 | -9 | 0  | 341.46 | 7.71 |
| 9 | -9 | 0  | 403.77 | 8.00 |
| 9 | -9 | 1  | 8.83   | 1.68 |
| 9 | -9 | 1  | 10.57  | 1.21 |
| 9 | -9 | 1  | 13.41  | 1.46 |
| 9 | -9 | 1  | 9.32   | 1.37 |
| 9 | -9 | 1  | 9.71   | 1.52 |
| 9 | -9 | 1  | 12.11  | 1.62 |
| 9 | -9 | 2  | 97.30  | 3.88 |
| 9 | -9 | 2  | 104.04 | 3.13 |
| 9 | -9 | 2  | 109.12 | 3.63 |
| 9 | -9 | 2  | 107.74 | 3.63 |
| 9 | -9 | 2  | 101.22 | 3.73 |
| 9 | -9 | 2  | 101.90 | 3.93 |
| 9 | -9 | 2  | 113.27 | 3.92 |
| 9 | -9 | 3  | 48.46  | 1.96 |
| 9 | -9 | 3  | 51.09  | 2.38 |
| 9 | -9 | 3  | 46.87  | 2.29 |
| 9 | -9 | 3  | 42.83  | 2.33 |
| 9 | -9 | 3  | 42.26  | 2.37 |
| 9 | -9 | 4  | 13.83  | 1.29 |
| 9 | -9 | 4  | 14.50  | 1.24 |
| 9 | -9 | 4  | 12.76  | 1.29 |
| 9 | -9 | 4  | 14.32  | 1.43 |
| 9 | -9 | 4  | 12.97  | 0.94 |
| 9 | -9 | 5  | 23.12  | 1.37 |
| 9 | -9 | 5  | 22.30  | 1.29 |
| 9 | -9 | 5  | 21.70  | 1.50 |
| 9 | -9 | 6  | 33.07  | 1.27 |

## CIF 31

|   |    |     |        |      |
|---|----|-----|--------|------|
| 9 | -9 | 6   | 37.57  | 1.60 |
| 9 | -8 | -10 | 194.53 | 2.90 |
| 9 | -8 | -10 | 202.97 | 3.66 |
| 9 | -8 | -9  | 37.88  | 1.46 |
| 9 | -8 | -9  | 36.24  | 1.91 |
| 9 | -8 | -9  | 40.13  | 1.61 |
| 9 | -8 | -9  | 33.73  | 1.84 |
| 9 | -8 | -8  | 6.41   | 1.11 |
| 9 | -8 | -8  | 7.52   | 0.92 |
| 9 | -8 | -8  | 7.45   | 1.15 |
| 9 | -8 | -7  | 2.13   | 1.04 |
| 9 | -8 | -7  | 2.79   | 0.81 |
| 9 | -8 | -7  | 1.37   | 0.75 |
| 9 | -8 | -7  | 2.13   | 0.67 |
| 9 | -8 | -6  | 31.22  | 2.00 |
| 9 | -8 | -6  | 41.99  | 2.50 |
| 9 | -8 | -6  | 36.60  | 2.13 |
| 9 | -8 | -6  | 32.51  | 1.98 |
| 9 | -8 | -6  | 32.74  | 2.34 |
| 9 | -8 | -6  | 33.77  | 2.27 |
| 9 | -8 | -6  | 38.24  | 2.45 |
| 9 | -8 | -6  | 40.26  | 1.86 |
| 9 | -8 | -6  | 40.47  | 2.62 |
| 9 | -8 | -5  | 296.78 | 6.77 |
| 9 | -8 | -5  | 292.79 | 6.70 |
| 9 | -8 | -5  | 306.67 | 7.20 |
| 9 | -8 | -5  | 319.05 | 7.28 |
| 9 | -8 | -5  | 294.42 | 6.34 |
| 9 | -8 | -5  | 303.74 | 6.54 |
| 9 | -8 | -5  | 269.31 | 6.11 |
| 9 | -8 | -5  | 292.00 | 7.12 |
| 9 | -8 | -5  | 316.04 | 7.33 |
| 9 | -8 | -5  | 314.29 | 7.20 |
| 9 | -8 | -5  | 329.91 | 7.46 |
| 9 | -8 | -4  | 83.10  | 3.70 |
| 9 | -8 | -4  | 100.70 | 4.29 |
| 9 | -8 | -4  | 91.85  | 3.87 |
| 9 | -8 | -4  | 87.42  | 3.89 |
| 9 | -8 | -4  | 95.58  | 3.98 |
| 9 | -8 | -4  | 84.74  | 3.33 |
| 9 | -8 | -4  | 83.55  | 3.58 |

## CIF 31

|   |    |    |        |      |
|---|----|----|--------|------|
| 9 | -8 | -4 | 87.21  | 3.32 |
| 9 | -8 | -4 | 87.20  | 3.85 |
| 9 | -8 | -4 | 91.97  | 3.96 |
| 9 | -8 | -4 | 89.75  | 3.81 |
| 9 | -8 | -3 | 10.51  | 1.86 |
| 9 | -8 | -3 | 9.70   | 2.02 |
| 9 | -8 | -3 | 11.18  | 1.69 |
| 9 | -8 | -3 | 11.10  | 1.33 |
| 9 | -8 | -3 | 10.86  | 1.99 |
| 9 | -8 | -3 | 10.00  | 1.23 |
| 9 | -8 | -3 | 13.85  | 1.72 |
| 9 | -8 | -3 | 13.79  | 1.72 |
| 9 | -8 | -3 | 8.22   | 2.41 |
| 9 | -8 | -3 | 10.74  | 1.56 |
| 9 | -8 | -2 | 141.19 | 5.17 |
| 9 | -8 | -2 | 154.13 | 5.67 |
| 9 | -8 | -2 | 148.61 | 5.07 |
| 9 | -8 | -2 | 149.02 | 4.54 |
| 9 | -8 | -2 | 158.15 | 5.35 |
| 9 | -8 | -2 | 134.18 | 4.73 |
| 9 | -8 | -2 | 144.44 | 5.10 |
| 9 | -8 | -2 | 151.92 | 5.04 |
| 9 | -8 | -1 | 101.49 | 4.38 |
| 9 | -8 | -1 | 98.13  | 4.77 |
| 9 | -8 | -1 | 103.01 | 3.73 |
| 9 | -8 | -1 | 91.57  | 3.89 |
| 9 | -8 | -1 | 90.77  | 4.07 |
| 9 | -8 | -1 | 93.52  | 4.27 |
| 9 | -8 | -1 | 99.21  | 4.08 |
| 9 | -8 | 0  | 43.85  | 2.93 |
| 9 | -8 | 0  | 39.08  | 2.38 |
| 9 | -8 | 0  | 37.29  | 2.03 |
| 9 | -8 | 0  | 40.39  | 2.36 |
| 9 | -8 | 0  | 37.81  | 2.50 |
| 9 | -8 | 0  | 33.22  | 2.61 |
| 9 | -8 | 0  | 40.69  | 2.64 |
| 9 | -8 | 1  | 182.04 | 5.70 |
| 9 | -8 | 1  | 206.36 | 5.56 |
| 9 | -8 | 1  | 185.91 | 4.98 |
| 9 | -8 | 1  | 189.81 | 5.11 |
| 9 | -8 | 1  | 166.01 | 5.14 |



## CIF 31

|   |    |     |        |      |
|---|----|-----|--------|------|
| 9 | -8 | 1   | 179.77 | 5.29 |
| 9 | -8 | 2   | 12.54  | 1.63 |
| 9 | -8 | 2   | 14.93  | 1.52 |
| 9 | -8 | 2   | 15.19  | 1.49 |
| 9 | -8 | 2   | 14.07  | 1.58 |
| 9 | -8 | 2   | 16.66  | 1.85 |
| 9 | -8 | 2   | 14.70  | 1.59 |
| 9 | -8 | 3   | 267.59 | 5.68 |
| 9 | -8 | 3   | 255.17 | 6.00 |
| 9 | -8 | 3   | 254.20 | 6.44 |
| 9 | -8 | 4   | 82.17  | 2.81 |
| 9 | -8 | 4   | 76.65  | 2.70 |
| 9 | -8 | 4   | 77.91  | 2.99 |
| 9 | -8 | 4   | 76.81  | 3.28 |
| 9 | -8 | 5   | 176.31 | 3.76 |
| 9 | -8 | 5   | 158.19 | 4.38 |
| 9 | -8 | 6   | 11.27  | 1.00 |
| 9 | -7 | -11 | 1.84   | 0.46 |
| 9 | -7 | -11 | 1.38   | 0.50 |
| 9 | -7 | -11 | 1.65   | 0.45 |
| 9 | -7 | -10 | 35.10  | 2.00 |
| 9 | -7 | -10 | 37.87  | 1.68 |
| 9 | -7 | -10 | 40.49  | 1.98 |
| 9 | -7 | -9  | 5.28   | 1.08 |
| 9 | -7 | -9  | 4.86   | 1.02 |
| 9 | -7 | -9  | 4.99   | 0.96 |
| 9 | -7 | -9  | 6.49   | 0.93 |
| 9 | -7 | -9  | 6.28   | 1.15 |
| 9 | -7 | -8  | 367.01 | 7.03 |
| 9 | -7 | -8  | 375.04 | 8.06 |
| 9 | -7 | -8  | 356.00 | 7.74 |
| 9 | -7 | -8  | 338.79 | 7.39 |
| 9 | -7 | -8  | 355.79 | 7.44 |
| 9 | -7 | -8  | 428.27 | 6.81 |
| 9 | -7 | -8  | 400.53 | 8.02 |
| 9 | -7 | -7  | 22.29  | 1.88 |
| 9 | -7 | -7  | 22.01  | 1.88 |
| 9 | -7 | -7  | 25.61  | 2.32 |
| 9 | -7 | -7  | 21.39  | 1.63 |
| 9 | -7 | -7  | 20.74  | 1.99 |
| 9 | -7 | -7  | 22.76  | 1.98 |

## CIF 31

|   |    |    |        |      |
|---|----|----|--------|------|
| 9 | -7 | -7 | 26.16  | 2.10 |
| 9 | -7 | -7 | 27.22  | 1.70 |
| 9 | -7 | -6 | 4.85   | 1.10 |
| 9 | -7 | -6 | 5.04   | 1.25 |
| 9 | -7 | -6 | 6.10   | 1.15 |
| 9 | -7 | -6 | 4.94   | 1.39 |
| 9 | -7 | -6 | 4.52   | 0.95 |
| 9 | -7 | -6 | 5.41   | 1.18 |
| 9 | -7 | -6 | 5.87   | 1.27 |
| 9 | -7 | -6 | 5.83   | 1.27 |
| 9 | -7 | -6 | 5.54   | 1.29 |
| 9 | -7 | -6 | 5.00   | 0.92 |
| 9 | -7 | -6 | 5.92   | 1.37 |
| 9 | -7 | -5 | 32.14  | 2.43 |
| 9 | -7 | -5 | 32.00  | 2.65 |
| 9 | -7 | -5 | 35.20  | 2.56 |
| 9 | -7 | -5 | 30.80  | 2.82 |
| 9 | -7 | -5 | 32.59  | 2.59 |
| 9 | -7 | -5 | 36.66  | 2.61 |
| 9 | -7 | -5 | 27.46  | 1.89 |
| 9 | -7 | -5 | 34.18  | 2.49 |
| 9 | -7 | -5 | 33.21  | 2.46 |
| 9 | -7 | -5 | 31.49  | 2.45 |
| 9 | -7 | -5 | 28.87  | 2.48 |
| 9 | -7 | -5 | 31.54  | 2.41 |
| 9 | -7 | -5 | 33.82  | 1.77 |
| 9 | -7 | -5 | 34.19  | 2.56 |
| 9 | -7 | -4 | 295.42 | 7.39 |
| 9 | -7 | -4 | 260.46 | 7.77 |
| 9 | -7 | -4 | 291.79 | 7.27 |
| 9 | -7 | -4 | 295.09 | 7.58 |
| 9 | -7 | -4 | 254.90 | 5.83 |
| 9 | -7 | -4 | 294.37 | 7.43 |
| 9 | -7 | -4 | 280.97 | 7.05 |
| 9 | -7 | -4 | 254.14 | 7.04 |
| 9 | -7 | -4 | 287.33 | 7.42 |
| 9 | -7 | -4 | 253.85 | 7.14 |
| 9 | -7 | -4 | 287.67 | 7.13 |
| 9 | -7 | -4 | 285.03 | 7.25 |
| 9 | -7 | -3 | 0.99   | 1.63 |
| 9 | -7 | -3 | 0.64   | 0.91 |

## CIF 31

|   |    |    |       |      |
|---|----|----|-------|------|
| 9 | -7 | -3 | 0.10  | 1.75 |
| 9 | -7 | -3 | 0.34  | 0.84 |
| 9 | -7 | -3 | 0.48  | 1.04 |
| 9 | -7 | -3 | -0.11 | 2.19 |
| 9 | -7 | -3 | 0.09  | 0.93 |
| 9 | -7 | -2 | 59.93 | 3.58 |
| 9 | -7 | -2 | 65.40 | 3.25 |
| 9 | -7 | -2 | 56.83 | 3.33 |
| 9 | -7 | -2 | 62.94 | 2.91 |
| 9 | -7 | -2 | 61.84 | 3.20 |
| 9 | -7 | -2 | 61.75 | 3.80 |
| 9 | -7 | -2 | 63.39 | 3.12 |
| 9 | -7 | -2 | 64.84 | 3.26 |
| 9 | -7 | -2 | 59.50 | 3.04 |
| 9 | -7 | -1 | 59.41 | 3.45 |
| 9 | -7 | -1 | 63.54 | 3.05 |
| 9 | -7 | -1 | 61.39 | 2.88 |
| 9 | -7 | -1 | 65.33 | 3.29 |
| 9 | -7 | -1 | 56.81 | 3.47 |
| 9 | -7 | -1 | 67.47 | 3.35 |
| 9 | -7 | -1 | 67.89 | 3.29 |
| 9 | -7 | -1 | 56.28 | 2.78 |
| 9 | -7 | 0  | 35.73 | 2.71 |
| 9 | -7 | 0  | 34.65 | 2.35 |
| 9 | -7 | 0  | 38.11 | 2.27 |
| 9 | -7 | 0  | 39.67 | 2.52 |
| 9 | -7 | 0  | 38.20 | 2.74 |
| 9 | -7 | 0  | 36.45 | 2.55 |
| 9 | -7 | 0  | 37.81 | 2.51 |
| 9 | -7 | 1  | 2.93  | 0.97 |
| 9 | -7 | 1  | 1.65  | 0.85 |
| 9 | -7 | 1  | 1.98  | 0.86 |
| 9 | -7 | 1  | 1.92  | 0.94 |
| 9 | -7 | 1  | 1.85  | 1.01 |
| 9 | -7 | 1  | 2.63  | 1.02 |
| 9 | -7 | 2  | 6.12  | 1.34 |
| 9 | -7 | 2  | 7.81  | 1.28 |
| 9 | -7 | 2  | 7.15  | 1.08 |
| 9 | -7 | 2  | 6.40  | 1.04 |
| 9 | -7 | 2  | 4.90  | 1.08 |
| 9 | -7 | 2  | 6.67  | 1.34 |

## CIF 31

|   |    |     |        |      |
|---|----|-----|--------|------|
| 9 | -7 | 3   | 359.34 | 8.14 |
| 9 | -7 | 3   | 363.32 | 6.55 |
| 9 | -7 | 3   | 338.59 | 6.37 |
| 9 | -7 | 3   | 338.78 | 6.95 |
| 9 | -7 | 3   | 329.57 | 7.57 |
| 9 | -7 | 4   | 197.15 | 5.55 |
| 9 | -7 | 4   | 208.70 | 4.41 |
| 9 | -7 | 4   | 174.68 | 4.47 |
| 9 | -7 | 4   | 174.54 | 5.15 |
| 9 | -7 | 5   | 1.30   | 0.70 |
| 9 | -7 | 6   | 31.26  | 1.45 |
| 9 | -6 | -11 | 3.30   | 0.90 |
| 9 | -6 | -11 | 3.70   | 0.73 |
| 9 | -6 | -10 | 160.44 | 4.74 |
| 9 | -6 | -10 | 142.76 | 4.38 |
| 9 | -6 | -10 | 142.02 | 4.39 |
| 9 | -6 | -10 | 166.04 | 4.57 |
| 9 | -6 | -9  | 19.18  | 1.76 |
| 9 | -6 | -9  | 19.00  | 1.94 |
| 9 | -6 | -9  | 14.23  | 1.61 |
| 9 | -6 | -9  | 16.96  | 1.72 |
| 9 | -6 | -9  | 15.36  | 1.73 |
| 9 | -6 | -8  | 40.30  | 2.56 |
| 9 | -6 | -8  | 47.01  | 2.81 |
| 9 | -6 | -8  | 44.92  | 2.37 |
| 9 | -6 | -8  | 45.56  | 3.00 |
| 9 | -6 | -8  | 43.44  | 2.75 |
| 9 | -6 | -8  | 39.23  | 2.63 |
| 9 | -6 | -8  | 40.36  | 2.56 |
| 9 | -6 | -7  | 5.03   | 1.20 |
| 9 | -6 | -7  | 3.61   | 1.27 |
| 9 | -6 | -7  | 5.45   | 1.33 |
| 9 | -6 | -7  | 5.84   | 1.21 |
| 9 | -6 | -7  | 4.55   | 1.20 |
| 9 | -6 | -7  | 4.66   | 1.21 |
| 9 | -6 | -7  | 4.90   | 1.19 |
| 9 | -6 | -7  | 3.66   | 1.32 |
| 9 | -6 | -6  | 270.88 | 7.18 |
| 9 | -6 | -6  | 307.05 | 7.81 |
| 9 | -6 | -6  | 278.34 | 7.36 |
| 9 | -6 | -6  | 287.00 | 7.06 |

## CIF 31

|   |    |    |        |      |
|---|----|----|--------|------|
| 9 | -6 | -6 | 285.77 | 7.22 |
| 9 | -6 | -6 | 280.99 | 7.09 |
| 9 | -6 | -6 | 283.87 | 7.37 |
| 9 | -6 | -6 | 269.48 | 6.88 |
| 9 | -6 | -6 | 302.56 | 7.14 |
| 9 | -6 | -6 | 285.42 | 7.52 |
| 9 | -6 | -5 | 137.34 | 5.15 |
| 9 | -6 | -5 | 135.03 | 5.72 |
| 9 | -6 | -5 | 140.00 | 5.11 |
| 9 | -6 | -5 | 133.78 | 4.91 |
| 9 | -6 | -5 | 147.34 | 5.24 |
| 9 | -6 | -5 | 135.03 | 4.80 |
| 9 | -6 | -5 | 132.23 | 5.48 |
| 9 | -6 | -5 | 134.45 | 5.50 |
| 9 | -6 | -5 | 137.29 | 4.71 |
| 9 | -6 | -5 | 142.55 | 5.09 |
| 9 | -6 | -4 | 10.45  | 1.92 |
| 9 | -6 | -4 | 14.18  | 1.80 |
| 9 | -6 | -4 | 10.34  | 1.98 |
| 9 | -6 | -4 | 11.02  | 1.70 |
| 9 | -6 | -4 | 12.31  | 2.14 |
| 9 | -6 | -4 | 12.24  | 1.58 |
| 9 | -6 | -4 | 10.32  | 3.12 |
| 9 | -6 | -4 | 9.28   | 2.84 |
| 9 | -6 | -4 | 12.41  | 1.60 |
| 9 | -6 | -4 | 11.85  | 1.68 |
| 9 | -6 | -3 | 2.39   | 1.60 |
| 9 | -6 | -3 | 3.60   | 1.83 |
| 9 | -6 | -3 | 0.51   | 0.97 |
| 9 | -6 | -3 | 2.14   | 1.62 |
| 9 | -6 | -3 | 2.49   | 1.22 |
| 9 | -6 | -3 | 1.62   | 1.67 |
| 9 | -6 | -3 | 2.84   | 0.97 |
| 9 | -6 | -3 | 3.96   | 1.24 |
| 9 | -6 | -3 | 2.41   | 2.06 |
| 9 | -6 | -3 | 3.42   | 1.09 |
| 9 | -6 | -3 | 2.63   | 0.96 |
| 9 | -6 | -2 | 68.67  | 3.80 |
| 9 | -6 | -2 | 105.93 | 4.22 |
| 9 | -6 | -2 | 92.05  | 4.20 |
| 9 | -6 | -2 | 106.74 | 4.36 |

## CIF 31

|   |    |     |        |      |
|---|----|-----|--------|------|
| 9 | -6 | -2  | 89.47  | 3.28 |
| 9 | -6 | -2  | 93.95  | 3.82 |
| 9 | -6 | -2  | 89.24  | 4.08 |
| 9 | -6 | -2  | 87.17  | 4.45 |
| 9 | -6 | -2  | 99.41  | 3.96 |
| 9 | -6 | -2  | 95.91  | 3.83 |
| 9 | -6 | -2  | 88.19  | 3.60 |
| 9 | -6 | -1  | 144.61 | 4.85 |
| 9 | -6 | -1  | 138.31 | 4.04 |
| 9 | -6 | -1  | 132.87 | 4.49 |
| 9 | -6 | -1  | 131.65 | 4.91 |
| 9 | -6 | -1  | 133.56 | 4.53 |
| 9 | -6 | 0   | 9.65   | 1.61 |
| 9 | -6 | 0   | 6.95   | 1.09 |
| 9 | -6 | 0   | 8.14   | 1.29 |
| 9 | -6 | 0   | 8.40   | 1.46 |
| 9 | -6 | 0   | 8.31   | 1.33 |
| 9 | -6 | 0   | 7.49   | 1.33 |
| 9 | -6 | 1   | 121.60 | 4.86 |
| 9 | -6 | 1   | 108.48 | 3.94 |
| 9 | -6 | 1   | 112.76 | 4.53 |
| 9 | -6 | 1   | 127.99 | 4.31 |
| 9 | -6 | 2   | 1.72   | 1.07 |
| 9 | -6 | 2   | 1.51   | 0.75 |
| 9 | -6 | 2   | 1.82   | 0.98 |
| 9 | -6 | 2   | 3.13   | 0.99 |
| 9 | -6 | 3   | 1.51   | 0.94 |
| 9 | -6 | 3   | 1.61   | 0.83 |
| 9 | -6 | 3   | 1.10   | 0.85 |
| 9 | -6 | 4   | 15.39  | 1.67 |
| 9 | -6 | 4   | 14.15  | 1.52 |
| 9 | -6 | 5   | 179.83 | 4.57 |
| 9 | -5 | -12 | 14.79  | 1.38 |
| 9 | -5 | -11 | 375.96 | 6.75 |
| 9 | -5 | -11 | 386.56 | 7.50 |
| 9 | -5 | -10 | 124.01 | 4.27 |
| 9 | -5 | -10 | 123.95 | 3.53 |
| 9 | -5 | -10 | 117.60 | 4.19 |
| 9 | -5 | -10 | 118.67 | 4.33 |
| 9 | -5 | -10 | 131.51 | 4.38 |
| 9 | -5 | -9  | 55.93  | 3.05 |

## CIF 31

|   |    |    |        |       |
|---|----|----|--------|-------|
| 9 | -5 | -9 | 58.75  | 3.21  |
| 9 | -5 | -9 | 60.34  | 2.89  |
| 9 | -5 | -9 | 59.49  | 3.17  |
| 9 | -5 | -9 | 59.16  | 3.23  |
| 9 | -5 | -9 | 69.17  | 3.44  |
| 9 | -5 | -8 | 13.01  | 1.65  |
| 9 | -5 | -8 | 13.03  | 1.80  |
| 9 | -5 | -8 | 9.75   | 1.45  |
| 9 | -5 | -8 | 11.49  | 1.53  |
| 9 | -5 | -8 | 9.86   | 1.39  |
| 9 | -5 | -8 | 11.71  | 1.51  |
| 9 | -5 | -7 | 25.48  | 2.26  |
| 9 | -5 | -7 | 20.67  | 2.22  |
| 9 | -5 | -7 | 25.07  | 2.32  |
| 9 | -5 | -7 | 22.87  | 2.16  |
| 9 | -5 | -7 | 27.19  | 2.31  |
| 9 | -5 | -7 | 23.78  | 2.23  |
| 9 | -5 | -7 | 20.23  | 1.99  |
| 9 | -5 | -7 | 23.79  | 2.07  |
| 9 | -5 | -7 | 22.43  | 2.11  |
| 9 | -5 | -7 | 21.63  | 2.02  |
| 9 | -5 | -7 | 23.76  | 2.29  |
| 9 | -5 | -6 | 35.17  | 2.69  |
| 9 | -5 | -6 | 40.57  | 3.13  |
| 9 | -5 | -6 | 38.84  | 3.34  |
| 9 | -5 | -6 | 35.97  | 2.71  |
| 9 | -5 | -6 | 38.41  | 2.78  |
| 9 | -5 | -6 | 37.21  | 2.78  |
| 9 | -5 | -6 | 29.46  | 2.32  |
| 9 | -5 | -6 | 35.40  | 3.17  |
| 9 | -5 | -6 | 29.86  | 2.52  |
| 9 | -5 | -6 | 31.56  | 2.89  |
| 9 | -5 | -6 | 33.40  | 2.36  |
| 9 | -5 | -6 | 38.33  | 2.81  |
| 9 | -5 | -5 | 368.95 | 8.95  |
| 9 | -5 | -5 | 427.12 | 10.10 |
| 9 | -5 | -5 | 411.13 | 9.21  |
| 9 | -5 | -5 | 413.88 | 9.03  |
| 9 | -5 | -5 | 420.79 | 9.07  |
| 9 | -5 | -5 | 442.77 | 9.54  |
| 9 | -5 | -5 | 388.62 | 8.42  |

## CIF 31

|   |    |    |        |      |
|---|----|----|--------|------|
| 9 | -5 | -5 | 403.94 | 9.80 |
| 9 | -5 | -5 | 403.30 | 9.17 |
| 9 | -5 | -5 | 403.69 | 9.56 |
| 9 | -5 | -5 | 415.01 | 8.41 |
| 9 | -5 | -5 | 434.46 | 9.17 |
| 9 | -5 | -4 | 94.21  | 5.82 |
| 9 | -5 | -4 | 106.09 | 4.49 |
| 9 | -5 | -4 | 120.55 | 4.76 |
| 9 | -5 | -4 | 121.91 | 4.61 |
| 9 | -5 | -4 | 113.21 | 4.88 |
| 9 | -5 | -4 | 109.42 | 4.17 |
| 9 | -5 | -4 | 103.46 | 5.22 |
| 9 | -5 | -4 | 120.16 | 4.75 |
| 9 | -5 | -4 | 112.60 | 5.32 |
| 9 | -5 | -4 | 123.51 | 4.29 |
| 9 | -5 | -4 | 115.21 | 4.45 |
| 9 | -5 | -3 | 0.64   | 1.43 |
| 9 | -5 | -3 | 0.74   | 0.96 |
| 9 | -5 | -3 | 0.15   | 1.16 |
| 9 | -5 | -3 | 0.34   | 0.91 |
| 9 | -5 | -3 | 1.14   | 1.27 |
| 9 | -5 | -3 | 0.51   | 0.75 |
| 9 | -5 | -3 | 2.22   | 1.08 |
| 9 | -5 | -3 | 0.57   | 1.55 |
| 9 | -5 | -3 | 0.84   | 0.70 |
| 9 | -5 | -3 | 1.03   | 0.83 |
| 9 | -5 | -3 | 0.77   | 0.79 |
| 9 | -5 | -2 | 147.59 | 5.34 |
| 9 | -5 | -2 | 148.07 | 5.17 |
| 9 | -5 | -2 | 151.70 | 5.21 |
| 9 | -5 | -2 | 158.67 | 5.14 |
| 9 | -5 | -2 | 139.04 | 4.48 |
| 9 | -5 | -2 | 148.31 | 5.23 |
| 9 | -5 | -2 | 151.18 | 5.86 |
| 9 | -5 | -2 | 161.88 | 5.00 |
| 9 | -5 | -2 | 139.65 | 4.49 |
| 9 | -5 | -2 | 141.33 | 4.52 |
| 9 | -5 | -1 | 57.47  | 3.35 |
| 9 | -5 | -1 | 64.06  | 3.31 |
| 9 | -5 | -1 | 46.92  | 2.54 |
| 9 | -5 | -1 | 53.80  | 3.07 |



## CIF 31

|   |    |     |        |       |
|---|----|-----|--------|-------|
| 9 | -5 | -1  | 57.54  | 3.64  |
| 9 | -5 | -1  | 67.55  | 3.27  |
| 9 | -5 | -1  | 52.86  | 2.70  |
| 9 | -5 | 0   | 336.36 | 8.21  |
| 9 | -5 | 0   | 357.12 | 7.73  |
| 9 | -5 | 0   | 331.52 | 6.76  |
| 9 | -5 | 0   | 338.27 | 7.85  |
| 9 | -5 | 0   | 366.80 | 8.02  |
| 9 | -5 | 0   | 321.80 | 6.81  |
| 9 | -5 | 1   | 165.04 | 5.54  |
| 9 | -5 | 1   | 155.86 | 5.17  |
| 9 | -5 | 1   | 159.05 | 4.46  |
| 9 | -5 | 2   | 163.78 | 5.41  |
| 9 | -5 | 2   | 156.20 | 4.98  |
| 9 | -5 | 3   | 211.46 | 5.87  |
| 9 | -5 | 3   | 181.74 | 5.23  |
| 9 | -5 | 4   | 225.23 | 5.75  |
| 9 | -5 | 4   | 208.48 | 5.13  |
| 9 | -4 | -13 | 71.75  | 1.84  |
| 9 | -4 | -12 | 34.93  | 1.94  |
| 9 | -4 | -11 | 2.13   | 0.99  |
| 9 | -4 | -11 | 1.92   | 1.05  |
| 9 | -4 | -11 | 1.63   | 0.89  |
| 9 | -4 | -10 | 30.01  | 2.29  |
| 9 | -4 | -10 | 29.50  | 2.36  |
| 9 | -4 | -10 | 32.34  | 2.19  |
| 9 | -4 | -10 | 31.73  | 2.45  |
| 9 | -4 | -10 | 28.47  | 2.14  |
| 9 | -4 | -10 | 37.61  | 2.54  |
| 9 | -4 | -9  | 550.49 | 10.48 |
| 9 | -4 | -9  | 569.94 | 10.88 |
| 9 | -4 | -9  | 553.51 | 9.90  |
| 9 | -4 | -9  | 551.50 | 10.58 |
| 9 | -4 | -9  | 502.58 | 9.58  |
| 9 | -4 | -9  | 478.21 | 9.29  |
| 9 | -4 | -8  | 75.22  | 3.80  |
| 9 | -4 | -8  | 82.10  | 4.12  |
| 9 | -4 | -8  | 78.65  | 3.77  |
| 9 | -4 | -8  | 84.49  | 3.85  |
| 9 | -4 | -8  | 83.19  | 4.09  |
| 9 | -4 | -8  | 72.79  | 3.46  |

## CIF 31

|   |    |    |        |       |
|---|----|----|--------|-------|
| 9 | -4 | -8 | 75.54  | 3.82  |
| 9 | -4 | -8 | 74.50  | 3.66  |
| 9 | -4 | -8 | 77.28  | 3.38  |
| 9 | -4 | -8 | 78.79  | 3.98  |
| 9 | -4 | -7 | 266.09 | 7.60  |
| 9 | -4 | -7 | 337.55 | 8.16  |
| 9 | -4 | -7 | 345.83 | 8.69  |
| 9 | -4 | -7 | 350.53 | 8.30  |
| 9 | -4 | -7 | 348.28 | 8.25  |
| 9 | -4 | -7 | 351.62 | 8.34  |
| 9 | -4 | -7 | 348.13 | 7.95  |
| 9 | -4 | -7 | 313.29 | 7.45  |
| 9 | -4 | -7 | 359.48 | 8.27  |
| 9 | -4 | -7 | 307.13 | 7.84  |
| 9 | -4 | -7 | 338.94 | 8.30  |
| 9 | -4 | -7 | 326.43 | 7.24  |
| 9 | -4 | -7 | 372.61 | 8.62  |
| 9 | -4 | -6 | 15.50  | 2.42  |
| 9 | -4 | -6 | 16.87  | 1.96  |
| 9 | -4 | -6 | 20.40  | 3.21  |
| 9 | -4 | -6 | 14.67  | 1.87  |
| 9 | -4 | -6 | 16.87  | 1.91  |
| 9 | -4 | -6 | 16.70  | 2.15  |
| 9 | -4 | -6 | 12.73  | 4.77  |
| 9 | -4 | -6 | 15.74  | 1.69  |
| 9 | -4 | -6 | 16.58  | 3.11  |
| 9 | -4 | -6 | 15.05  | 1.86  |
| 9 | -4 | -6 | 15.08  | 2.65  |
| 9 | -4 | -6 | 15.86  | 1.64  |
| 9 | -4 | -6 | 16.75  | 1.97  |
| 9 | -4 | -5 | 420.41 | 9.36  |
| 9 | -4 | -5 | 336.72 | 10.50 |
| 9 | -4 | -5 | 407.12 | 9.93  |
| 9 | -4 | -5 | 460.02 | 9.29  |
| 9 | -4 | -5 | 446.77 | 9.00  |
| 9 | -4 | -5 | 457.00 | 9.85  |
| 9 | -4 | -5 | 390.29 | 8.14  |
| 9 | -4 | -5 | 417.56 | 10.32 |
| 9 | -4 | -5 | 424.15 | 9.21  |
| 9 | -4 | -5 | 383.69 | 9.77  |
| 9 | -4 | -5 | 408.45 | 8.01  |

## CIF 31

|   |    |    |        |      |
|---|----|----|--------|------|
| 9 | -4 | -5 | 459.69 | 9.36 |
| 9 | -4 | -4 | 286.13 | 7.45 |
| 9 | -4 | -4 | 249.02 | 8.68 |
| 9 | -4 | -4 | 306.79 | 7.85 |
| 9 | -4 | -4 | 290.18 | 7.21 |
| 9 | -4 | -4 | 293.60 | 7.14 |
| 9 | -4 | -4 | 289.08 | 8.43 |
| 9 | -4 | -4 | 281.13 | 6.43 |
| 9 | -4 | -4 | 279.24 | 7.29 |
| 9 | -4 | -4 | 258.27 | 7.93 |
| 9 | -4 | -4 | 268.54 | 6.16 |
| 9 | -4 | -4 | 265.04 | 6.81 |
| 9 | -4 | -3 | 208.67 | 6.29 |
| 9 | -4 | -3 | 226.56 | 7.73 |
| 9 | -4 | -3 | 211.47 | 6.31 |
| 9 | -4 | -3 | 208.35 | 6.02 |
| 9 | -4 | -3 | 212.41 | 5.84 |
| 9 | -4 | -3 | 201.20 | 6.47 |
| 9 | -4 | -3 | 181.74 | 4.97 |
| 9 | -4 | -3 | 195.48 | 5.87 |
| 9 | -4 | -3 | 193.68 | 6.72 |
| 9 | -4 | -3 | 218.77 | 5.76 |
| 9 | -4 | -3 | 200.54 | 5.11 |
| 9 | -4 | -3 | 196.00 | 5.57 |
| 9 | -4 | -2 | 0.75   | 0.85 |
| 9 | -4 | -2 | 1.18   | 1.26 |
| 9 | -4 | -2 | 1.29   | 1.05 |
| 9 | -4 | -2 | 1.16   | 0.90 |
| 9 | -4 | -2 | 0.74   | 0.82 |
| 9 | -4 | -2 | 1.36   | 0.79 |
| 9 | -4 | -2 | 0.80   | 0.74 |
| 9 | -4 | -1 | 23.93  | 2.14 |
| 9 | -4 | -1 | 23.07  | 2.14 |
| 9 | -4 | -1 | 23.04  | 2.07 |
| 9 | -4 | -1 | 23.58  | 1.93 |
| 9 | -4 | -1 | 20.72  | 1.90 |
| 9 | -4 | -1 | 25.64  | 2.10 |
| 9 | -4 | 0  | 33.00  | 2.52 |
| 9 | -4 | 0  | 33.64  | 2.43 |
| 9 | -4 | 0  | 33.86  | 2.23 |
| 9 | -4 | 0  | 35.48  | 2.40 |

## CIF 31

|   |    |     |        |      |
|---|----|-----|--------|------|
| 9 | -4 | 0   | 35.33  | 2.45 |
| 9 | -4 | 1   | 0.93   | 0.85 |
| 9 | -4 | 1   | 0.22   | 0.77 |
| 9 | -4 | 1   | 1.05   | 0.75 |
| 9 | -4 | 1   | 1.25   | 0.86 |
| 9 | -4 | 2   | 171.88 | 5.24 |
| 9 | -4 | 2   | 154.94 | 4.64 |
| 9 | -4 | 3   | 164.07 | 4.88 |
| 9 | -4 | 5   | 0.29   | 0.66 |
| 9 | -3 | -13 | 138.16 | 3.65 |
| 9 | -3 | -13 | 139.86 | 3.84 |
| 9 | -3 | -12 | 96.03  | 3.53 |
| 9 | -3 | -12 | 92.98  | 3.50 |
| 9 | -3 | -11 | 210.59 | 5.93 |
| 9 | -3 | -11 | 209.93 | 5.78 |
| 9 | -3 | -11 | 197.64 | 5.70 |
| 9 | -3 | -10 | 32.94  | 2.47 |
| 9 | -3 | -10 | 37.20  | 2.74 |
| 9 | -3 | -10 | 39.16  | 2.53 |
| 9 | -3 | -10 | 36.60  | 2.64 |
| 9 | -3 | -10 | 36.12  | 2.60 |
| 9 | -3 | -10 | 34.18  | 2.38 |
| 9 | -3 | -9  | 295.43 | 6.55 |
| 9 | -3 | -9  | 290.29 | 7.79 |
| 9 | -3 | -9  | 309.12 | 7.56 |
| 9 | -3 | -9  | 316.74 | 7.71 |
| 9 | -3 | -9  | 288.19 | 7.44 |
| 9 | -3 | -9  | 283.86 | 7.23 |
| 9 | -3 | -8  | 16.37  | 1.99 |
| 9 | -3 | -8  | 20.19  | 2.18 |
| 9 | -3 | -8  | 18.83  | 2.26 |
| 9 | -3 | -8  | 21.30  | 2.09 |
| 9 | -3 | -8  | 17.37  | 2.10 |
| 9 | -3 | -8  | 19.33  | 2.11 |
| 9 | -3 | -8  | 20.65  | 2.01 |
| 9 | -3 | -8  | 17.08  | 1.72 |
| 9 | -3 | -8  | 19.74  | 2.02 |
| 9 | -3 | -8  | 18.77  | 2.03 |
| 9 | -3 | -8  | 22.57  | 2.25 |
| 9 | -3 | -7  | 40.99  | 2.84 |
| 9 | -3 | -7  | 39.49  | 3.70 |

## CIF 31

|   |    |    |        |      |
|---|----|----|--------|------|
| 9 | -3 | -7 | 41.73  | 5.04 |
| 9 | -3 | -7 | 41.03  | 2.88 |
| 9 | -3 | -7 | 41.27  | 3.06 |
| 9 | -3 | -7 | 42.48  | 2.93 |
| 9 | -3 | -7 | 39.16  | 2.87 |
| 9 | -3 | -7 | 46.43  | 3.93 |
| 9 | -3 | -7 | 35.91  | 2.32 |
| 9 | -3 | -7 | 43.60  | 3.12 |
| 9 | -3 | -7 | 39.41  | 2.70 |
| 9 | -3 | -7 | 40.18  | 2.97 |
| 9 | -3 | -7 | 32.98  | 2.10 |
| 9 | -3 | -7 | 39.82  | 2.90 |
| 9 | -3 | -6 | 148.24 | 5.34 |
| 9 | -3 | -6 | 119.24 | 6.98 |
| 9 | -3 | -6 | 148.25 | 5.36 |
| 9 | -3 | -6 | 155.57 | 6.03 |
| 9 | -3 | -6 | 151.39 | 4.94 |
| 9 | -3 | -6 | 134.40 | 7.52 |
| 9 | -3 | -6 | 123.57 | 4.17 |
| 9 | -3 | -6 | 152.65 | 6.25 |
| 9 | -3 | -6 | 139.37 | 5.01 |
| 9 | -3 | -6 | 154.90 | 5.94 |
| 9 | -3 | -6 | 143.67 | 5.20 |
| 9 | -3 | -6 | 140.55 | 5.15 |
| 9 | -3 | -5 | 236.67 | 6.81 |
| 9 | -3 | -5 | 189.99 | 8.76 |
| 9 | -3 | -5 | 281.51 | 7.87 |
| 9 | -3 | -5 | 264.57 | 7.21 |
| 9 | -3 | -5 | 235.63 | 6.32 |
| 9 | -3 | -5 | 252.29 | 6.40 |
| 9 | -3 | -5 | 256.19 | 7.20 |
| 9 | -3 | -5 | 222.48 | 7.84 |
| 9 | -3 | -5 | 225.69 | 6.37 |
| 9 | -3 | -5 | 259.92 | 7.89 |
| 9 | -3 | -5 | 238.08 | 6.56 |
| 9 | -3 | -4 | 9.92   | 1.57 |
| 9 | -3 | -4 | 7.74   | 3.36 |
| 9 | -3 | -4 | 11.39  | 2.19 |
| 9 | -3 | -4 | 7.80   | 1.36 |
| 9 | -3 | -4 | 9.72   | 1.39 |
| 9 | -3 | -4 | 8.31   | 1.66 |

## CIF 31

|   |    |     |        |       |
|---|----|-----|--------|-------|
| 9 | -3 | -4  | 7.51   | 2.35  |
| 9 | -3 | -4  | 8.10   | 1.40  |
| 9 | -3 | -4  | 10.50  | 2.25  |
| 9 | -3 | -4  | 8.77   | 1.26  |
| 9 | -3 | -4  | 8.47   | 1.32  |
| 9 | -3 | -3  | 29.94  | 2.35  |
| 9 | -3 | -3  | 35.84  | 3.36  |
| 9 | -3 | -3  | 31.08  | 2.53  |
| 9 | -3 | -3  | 31.88  | 2.24  |
| 9 | -3 | -3  | 32.25  | 2.17  |
| 9 | -3 | -3  | 34.41  | 2.67  |
| 9 | -3 | -3  | 31.46  | 2.31  |
| 9 | -3 | -3  | 33.61  | 2.21  |
| 9 | -3 | -2  | 108.48 | 4.34  |
| 9 | -3 | -2  | 113.63 | 4.57  |
| 9 | -3 | -2  | 107.64 | 3.95  |
| 9 | -3 | -2  | 105.61 | 3.73  |
| 9 | -3 | -2  | 108.16 | 4.55  |
| 9 | -3 | -2  | 99.58  | 3.93  |
| 9 | -3 | -2  | 98.84  | 4.79  |
| 9 | -3 | -1  | 13.30  | 1.63  |
| 9 | -3 | -1  | 16.40  | 2.42  |
| 9 | -3 | -1  | 16.33  | 1.89  |
| 9 | -3 | -1  | 14.18  | 1.51  |
| 9 | -3 | -1  | 14.58  | 1.44  |
| 9 | -3 | -1  | 11.22  | 1.39  |
| 9 | -3 | -1  | 13.06  | 1.95  |
| 9 | -3 | 0   | 512.91 | 9.74  |
| 9 | -3 | 0   | 567.88 | 10.39 |
| 9 | -3 | 0   | 545.80 | 9.14  |
| 9 | -3 | 0   | 482.22 | 8.83  |
| 9 | -3 | 0   | 564.48 | 11.44 |
| 9 | -3 | 1   | 342.47 | 7.62  |
| 9 | -3 | 1   | 338.25 | 8.54  |
| 9 | -3 | 2   | 104.93 | 4.37  |
| 9 | -3 | 3   | 58.61  | 3.76  |
| 9 | -3 | 3   | 48.91  | 2.93  |
| 9 | -3 | 4   | 745.04 | 13.12 |
| 9 | -2 | -13 | 52.44  | 2.40  |
| 9 | -2 | -13 | 51.07  | 2.45  |
| 9 | -2 | -13 | 54.16  | 2.36  |

## CIF 31

|   |    |     |        |      |
|---|----|-----|--------|------|
| 9 | -2 | -12 | 570.19 | 9.69 |
| 9 | -2 | -12 | 539.98 | 9.37 |
| 9 | -2 | -11 | 88.27  | 3.95 |
| 9 | -2 | -11 | 96.23  | 3.76 |
| 9 | -2 | -11 | 89.96  | 3.78 |
| 9 | -2 | -11 | 78.40  | 3.52 |
| 9 | -2 | -11 | 85.13  | 3.55 |
| 9 | -2 | -10 | 155.76 | 5.26 |
| 9 | -2 | -10 | 153.12 | 4.65 |
| 9 | -2 | -10 | 162.67 | 5.65 |
| 9 | -2 | -10 | 166.74 | 5.35 |
| 9 | -2 | -10 | 151.72 | 5.13 |
| 9 | -2 | -10 | 151.97 | 5.14 |
| 9 | -2 | -10 | 153.13 | 5.21 |
| 9 | -2 | -9  | 111.56 | 4.57 |
| 9 | -2 | -9  | 115.45 | 4.35 |
| 9 | -2 | -9  | 107.98 | 4.49 |
| 9 | -2 | -9  | 107.15 | 4.36 |
| 9 | -2 | -9  | 105.79 | 4.41 |
| 9 | -2 | -9  | 101.82 | 4.47 |
| 9 | -2 | -8  | 52.97  | 3.17 |
| 9 | -2 | -8  | 51.87  | 3.09 |
| 9 | -2 | -8  | 58.37  | 3.56 |
| 9 | -2 | -8  | 58.46  | 3.22 |
| 9 | -2 | -8  | 55.31  | 3.49 |
| 9 | -2 | -8  | 50.12  | 3.13 |
| 9 | -2 | -8  | 51.22  | 3.07 |
| 9 | -2 | -8  | 59.94  | 3.45 |
| 9 | -2 | -8  | 54.30  | 3.12 |
| 9 | -2 | -8  | 50.10  | 3.26 |
| 9 | -2 | -7  | 4.87   | 1.26 |
| 9 | -2 | -7  | 5.19   | 1.04 |
| 9 | -2 | -7  | 4.94   | 2.88 |
| 9 | -2 | -7  | 5.14   | 4.94 |
| 9 | -2 | -7  | 5.69   | 1.60 |
| 9 | -2 | -7  | 4.16   | 1.25 |
| 9 | -2 | -7  | 3.79   | 1.10 |
| 9 | -2 | -7  | 3.66   | 3.19 |
| 9 | -2 | -7  | 5.64   | 1.72 |
| 9 | -2 | -7  | 4.26   | 1.16 |
| 9 | -2 | -7  | 4.57   | 1.43 |

## CIF 31

|   |    |    |        |      |
|---|----|----|--------|------|
| 9 | -2 | -7 | 4.20   | 1.55 |
| 9 | -2 | -6 | 0.63   | 0.91 |
| 9 | -2 | -6 | 4.73   | 4.65 |
| 9 | -2 | -6 | 1.79   | 1.29 |
| 9 | -2 | -6 | 1.03   | 1.03 |
| 9 | -2 | -6 | 0.53   | 0.80 |
| 9 | -2 | -6 | 2.16   | 1.18 |
| 9 | -2 | -6 | 5.09   | 4.88 |
| 9 | -2 | -6 | 0.06   | 2.38 |
| 9 | -2 | -6 | 1.00   | 0.80 |
| 9 | -2 | -6 | 0.31   | 1.64 |
| 9 | -2 | -6 | 0.49   | 1.54 |
| 9 | -2 | -5 | 0.20   | 0.84 |
| 9 | -2 | -5 | 1.11   | 5.15 |
| 9 | -2 | -5 | 1.16   | 1.43 |
| 9 | -2 | -5 | 0.16   | 0.98 |
| 9 | -2 | -5 | 4.54   | 2.54 |
| 9 | -2 | -5 | 0.38   | 1.00 |
| 9 | -2 | -5 | 1.79   | 5.60 |
| 9 | -2 | -5 | 1.54   | 2.92 |
| 9 | -2 | -5 | 0.59   | 0.73 |
| 9 | -2 | -5 | 4.11   | 1.60 |
| 9 | -2 | -4 | 202.01 | 5.95 |
| 9 | -2 | -4 | 209.20 | 6.50 |
| 9 | -2 | -4 | 217.47 | 6.50 |
| 9 | -2 | -4 | 213.33 | 5.45 |
| 9 | -2 | -4 | 210.40 | 5.22 |
| 9 | -2 | -4 | 209.38 | 6.41 |
| 9 | -2 | -4 | 187.17 | 5.35 |
| 9 | -2 | -4 | 214.92 | 6.93 |
| 9 | -2 | -3 | 18.34  | 1.84 |
| 9 | -2 | -3 | 17.28  | 2.93 |
| 9 | -2 | -3 | 21.87  | 2.25 |
| 9 | -2 | -3 | 18.63  | 1.64 |
| 9 | -2 | -3 | 19.36  | 2.05 |
| 9 | -2 | -3 | 18.60  | 1.68 |
| 9 | -2 | -3 | 21.63  | 2.36 |
| 9 | -2 | -2 | 252.67 | 6.40 |
| 9 | -2 | -2 | 259.94 | 8.75 |
| 9 | -2 | -2 | 274.38 | 7.27 |
| 9 | -2 | -2 | 276.29 | 7.05 |



## CIF 31

|   |    |     |        |       |
|---|----|-----|--------|-------|
| 9 | -2 | -1  | 24.50  | 1.96  |
| 9 | -2 | -1  | 31.70  | 2.45  |
| 9 | -2 | -1  | 27.30  | 2.21  |
| 9 | -2 | -1  | 27.18  | 2.51  |
| 9 | -2 | 0   | 96.38  | 5.21  |
| 9 | -2 | 0   | 89.12  | 3.96  |
| 9 | -2 | 0   | 89.09  | 3.71  |
| 9 | -2 | 1   | 141.12 | 4.77  |
| 9 | -2 | 1   | 139.45 | 4.40  |
| 9 | -2 | 2   | 3.16   | 1.38  |
| 9 | -2 | 2   | 2.45   | 0.97  |
| 9 | -2 | 3   | 54.19  | 3.50  |
| 9 | -1 | -13 | 61.72  | 2.70  |
| 9 | -1 | -13 | 61.75  | 2.75  |
| 9 | -1 | -12 | 4.72   | 1.21  |
| 9 | -1 | -12 | 5.44   | 1.43  |
| 9 | -1 | -12 | 4.33   | 0.99  |
| 9 | -1 | -12 | 4.94   | 1.01  |
| 9 | -1 | -11 | 164.61 | 5.04  |
| 9 | -1 | -11 | 140.45 | 4.47  |
| 9 | -1 | -11 | 145.98 | 4.75  |
| 9 | -1 | -11 | 167.09 | 5.18  |
| 9 | -1 | -10 | 204.15 | 6.06  |
| 9 | -1 | -10 | 239.47 | 6.16  |
| 9 | -1 | -10 | 228.79 | 6.73  |
| 9 | -1 | -10 | 217.47 | 5.92  |
| 9 | -1 | -10 | 213.08 | 5.99  |
| 9 | -1 | -10 | 223.56 | 6.46  |
| 9 | -1 | -9  | 54.21  | 3.15  |
| 9 | -1 | -9  | 66.69  | 3.15  |
| 9 | -1 | -9  | 66.69  | 3.48  |
| 9 | -1 | -9  | 60.73  | 3.55  |
| 9 | -1 | -9  | 61.79  | 3.11  |
| 9 | -1 | -9  | 65.34  | 3.22  |
| 9 | -1 | -9  | 60.05  | 3.19  |
| 9 | -1 | -9  | 61.04  | 3.48  |
| 9 | -1 | -8  | 771.27 | 13.03 |
| 9 | -1 | -8  | 827.97 | 12.48 |
| 9 | -1 | -8  | 810.03 | 13.50 |
| 9 | -1 | -8  | 874.22 | 14.17 |
| 9 | -1 | -8  | 859.87 | 14.38 |

## CIF 31

|   |    |    |        |       |
|---|----|----|--------|-------|
| 9 | -1 | -8 | 814.32 | 12.86 |
| 9 | -1 | -8 | 806.69 | 13.33 |
| 9 | -1 | -8 | 722.67 | 12.04 |
| 9 | -1 | -8 | 905.96 | 14.38 |
| 9 | -1 | -8 | 750.92 | 12.54 |
| 9 | -1 | -8 | 752.29 | 13.58 |
| 9 | -1 | -8 | 774.87 | 12.51 |
| 9 | -1 | -7 | 303.63 | 7.52  |
| 9 | -1 | -7 | 300.87 | 6.95  |
| 9 | -1 | -7 | 320.51 | 8.92  |
| 9 | -1 | -7 | 346.09 | 9.65  |
| 9 | -1 | -7 | 299.97 | 8.07  |
| 9 | -1 | -7 | 337.04 | 8.00  |
| 9 | -1 | -7 | 333.63 | 8.25  |
| 9 | -1 | -7 | 281.32 | 6.71  |
| 9 | -1 | -7 | 372.71 | 9.36  |
| 9 | -1 | -7 | 353.18 | 8.69  |
| 9 | -1 | -7 | 295.03 | 7.61  |
| 9 | -1 | -7 | 287.69 | 7.06  |
| 9 | -1 | -7 | 317.38 | 7.82  |
| 9 | -1 | -6 | 97.85  | 4.07  |
| 9 | -1 | -6 | 96.17  | 3.77  |
| 9 | -1 | -6 | 112.75 | 6.92  |
| 9 | -1 | -6 | 107.77 | 4.66  |
| 9 | -1 | -6 | 108.74 | 4.51  |
| 9 | -1 | -6 | 105.73 | 4.60  |
| 9 | -1 | -6 | 100.78 | 6.65  |
| 9 | -1 | -6 | 107.60 | 5.03  |
| 9 | -1 | -6 | 94.30  | 3.74  |
| 9 | -1 | -6 | 108.80 | 4.89  |
| 9 | -1 | -6 | 103.82 | 4.80  |
| 9 | -1 | -5 | 50.08  | 2.90  |
| 9 | -1 | -5 | 56.14  | 2.81  |
| 9 | -1 | -5 | 46.92  | 5.91  |
| 9 | -1 | -5 | 55.17  | 3.34  |
| 9 | -1 | -5 | 59.96  | 3.38  |
| 9 | -1 | -5 | 61.76  | 3.65  |
| 9 | -1 | -5 | 62.21  | 3.38  |
| 9 | -1 | -5 | 48.19  | 6.23  |
| 9 | -1 | -5 | 51.73  | 3.50  |
| 9 | -1 | -5 | 50.45  | 3.50  |

## CIF 31

|   |    |     |         |       |
|---|----|-----|---------|-------|
| 9 | -1 | -4  | 13.89   | 1.58  |
| 9 | -1 | -4  | 10.92   | 4.24  |
| 9 | -1 | -4  | 14.04   | 1.76  |
| 9 | -1 | -4  | 16.96   | 1.95  |
| 9 | -1 | -4  | 17.13   | 2.21  |
| 9 | -1 | -4  | 18.26   | 1.90  |
| 9 | -1 | -4  | 14.77   | 2.82  |
| 9 | -1 | -4  | 15.11   | 2.25  |
| 9 | -1 | -4  | 15.00   | 2.22  |
| 9 | -1 | -3  | 961.85  | 13.69 |
| 9 | -1 | -3  | 1029.25 | 15.12 |
| 9 | -1 | -3  | 1018.54 | 14.73 |
| 9 | -1 | -3  | 1005.41 | 16.56 |
| 9 | -1 | -3  | 1066.71 | 16.28 |
| 9 | -1 | -2  | 166.22  | 5.32  |
| 9 | -1 | -2  | 217.37  | 6.38  |
| 9 | -1 | -2  | 212.23  | 5.73  |
| 9 | -1 | -2  | 195.81  | 6.72  |
| 9 | -1 | -2  | 186.43  | 6.14  |
| 9 | -1 | -1  | 75.14   | 4.88  |
| 9 | -1 | -1  | 82.80   | 3.56  |
| 9 | -1 | -1  | 100.24  | 4.30  |
| 9 | -1 | -1  | 94.69   | 3.61  |
| 9 | -1 | -1  | 83.81   | 4.32  |
| 9 | -1 | -1  | 83.15   | 3.92  |
| 9 | -1 | 0   | 1.27    | 1.32  |
| 9 | -1 | 0   | 1.40    | 0.93  |
| 9 | -1 | 0   | 2.65    | 1.21  |
| 9 | -1 | 0   | 3.29    | 1.02  |
| 9 | -1 | 1   | 75.53   | 4.58  |
| 9 | -1 | 1   | 83.21   | 3.89  |
| 9 | -1 | 1   | 75.60   | 3.33  |
| 9 | -1 | 2   | 167.21  | 6.36  |
| 9 | -1 | 2   | 180.10  | 5.14  |
| 9 | -1 | 3   | 145.20  | 4.45  |
| 9 | 0  | -13 | 34.67   | 2.11  |
| 9 | 0  | -13 | 38.54   | 2.24  |
| 9 | 0  | -12 | 17.70   | 1.79  |
| 9 | 0  | -12 | 17.05   | 1.55  |
| 9 | 0  | -12 | 22.03   | 2.13  |
| 9 | 0  | -12 | 16.77   | 1.63  |

## CIF 31

|   |   |     |       |      |
|---|---|-----|-------|------|
| 9 | 0 | -11 | 39.33 | 2.66 |
| 9 | 0 | -11 | 37.58 | 2.54 |
| 9 | 0 | -10 | 49.42 | 2.79 |
| 9 | 0 | -10 | 60.27 | 3.17 |
| 9 | 0 | -10 | 57.65 | 3.32 |
| 9 | 0 | -10 | 58.09 | 3.72 |
| 9 | 0 | -10 | 54.24 | 2.77 |
| 9 | 0 | -10 | 44.42 | 2.52 |
| 9 | 0 | -10 | 55.31 | 3.22 |
| 9 | 0 | -9  | 63.28 | 3.23 |
| 9 | 0 | -9  | 72.37 | 3.31 |
| 9 | 0 | -9  | 67.82 | 3.42 |
| 9 | 0 | -9  | 60.46 | 3.46 |
| 9 | 0 | -9  | 74.95 | 3.75 |
| 9 | 0 | -9  | 61.96 | 4.05 |
| 9 | 0 | -9  | 73.81 | 3.69 |
| 9 | 0 | -9  | 67.78 | 3.42 |
| 9 | 0 | -9  | 53.32 | 2.78 |
| 9 | 0 | -9  | 60.82 | 3.07 |
| 9 | 0 | -8  | 2.67  | 1.03 |
| 9 | 0 | -8  | 3.56  | 1.20 |
| 9 | 0 | -8  | 3.11  | 1.09 |
| 9 | 0 | -8  | 6.58  | 1.82 |
| 9 | 0 | -8  | 2.76  | 1.22 |
| 9 | 0 | -8  | 2.25  | 1.39 |
| 9 | 0 | -8  | 4.39  | 1.33 |
| 9 | 0 | -8  | 2.38  | 1.88 |
| 9 | 0 | -8  | 2.66  | 1.31 |
| 9 | 0 | -8  | 2.86  | 1.21 |
| 9 | 0 | -8  | 2.94  | 1.06 |
| 9 | 0 | -7  | 12.62 | 1.54 |
| 9 | 0 | -7  | 11.68 | 1.53 |
| 9 | 0 | -7  | 13.22 | 2.50 |
| 9 | 0 | -7  | 15.37 | 3.52 |
| 9 | 0 | -7  | 14.65 | 1.81 |
| 9 | 0 | -7  | 11.21 | 1.60 |
| 9 | 0 | -7  | 15.55 | 2.25 |
| 9 | 0 | -7  | 12.35 | 1.74 |
| 9 | 0 | -7  | 10.07 | 4.85 |
| 9 | 0 | -7  | 13.62 | 2.53 |
| 9 | 0 | -7  | 15.79 | 2.47 |

## CIF 31

|   |   |    |        |      |
|---|---|----|--------|------|
| 9 | 0 | -7 | 14.44  | 1.91 |
| 9 | 0 | -7 | 14.36  | 1.98 |
| 9 | 0 | -6 | 23.60  | 1.92 |
| 9 | 0 | -6 | 24.38  | 2.05 |
| 9 | 0 | -6 | 29.93  | 4.32 |
| 9 | 0 | -6 | 23.52  | 2.23 |
| 9 | 0 | -6 | 26.92  | 6.26 |
| 9 | 0 | -6 | 28.14  | 2.36 |
| 9 | 0 | -6 | 26.09  | 2.62 |
| 9 | 0 | -6 | 24.89  | 2.25 |
| 9 | 0 | -6 | 29.64  | 4.31 |
| 9 | 0 | -6 | 26.11  | 2.58 |
| 9 | 0 | -6 | 21.46  | 3.44 |
| 9 | 0 | -6 | 24.77  | 2.37 |
| 9 | 0 | -6 | 23.54  | 2.62 |
| 9 | 0 | -5 | 242.09 | 6.12 |
| 9 | 0 | -5 | 249.85 | 9.37 |
| 9 | 0 | -5 | 219.66 | 6.33 |
| 9 | 0 | -5 | 286.49 | 7.28 |
| 9 | 0 | -5 | 241.28 | 7.19 |
| 9 | 0 | -5 | 264.42 | 6.92 |
| 9 | 0 | -5 | 221.14 | 8.91 |
| 9 | 0 | -5 | 289.02 | 7.89 |
| 9 | 0 | -5 | 251.53 | 7.09 |
| 9 | 0 | -5 | 268.41 | 7.71 |
| 9 | 0 | -4 | 43.50  | 2.49 |
| 9 | 0 | -4 | 34.70  | 2.44 |
| 9 | 0 | -4 | 45.37  | 2.94 |
| 9 | 0 | -4 | 45.13  | 2.88 |
| 9 | 0 | -4 | 53.06  | 3.62 |
| 9 | 0 | -4 | 42.32  | 2.87 |
| 9 | 0 | -4 | 43.43  | 3.35 |
| 9 | 0 | -3 | 172.93 | 8.01 |
| 9 | 0 | -3 | 188.23 | 5.32 |
| 9 | 0 | -3 | 200.70 | 6.20 |
| 9 | 0 | -3 | 196.62 | 5.67 |
| 9 | 0 | -3 | 167.54 | 7.35 |
| 9 | 0 | -3 | 207.85 | 6.61 |
| 9 | 0 | -3 | 196.18 | 6.05 |
| 9 | 0 | -2 | 90.74  | 5.57 |
| 9 | 0 | -2 | 113.66 | 4.09 |

## CIF 31

|   |   |     |        |      |
|---|---|-----|--------|------|
| 9 | 0 | -2  | 119.80 | 4.76 |
| 9 | 0 | -2  | 106.36 | 4.24 |
| 9 | 0 | -2  | 101.17 | 4.76 |
| 9 | 0 | -1  | 167.37 | 5.45 |
| 9 | 0 | -1  | 164.64 | 4.63 |
| 9 | 0 | -1  | 166.65 | 5.59 |
| 9 | 0 | -1  | 164.88 | 5.03 |
| 9 | 0 | -1  | 162.90 | 5.89 |
| 9 | 0 | 0   | 46.52  | 2.86 |
| 9 | 0 | 0   | 41.72  | 2.59 |
| 9 | 0 | 0   | 42.50  | 2.94 |
| 9 | 0 | 1   | 109.47 | 5.13 |
| 9 | 0 | 1   | 102.05 | 4.48 |
| 9 | 0 | 2   | 12.03  | 1.55 |
| 9 | 0 | 2   | 14.48  | 1.52 |
| 9 | 0 | 3   | 26.32  | 1.93 |
| 9 | 1 | -13 | 220.57 | 4.87 |
| 9 | 1 | -13 | 219.63 | 4.26 |
| 9 | 1 | -12 | 20.72  | 1.72 |
| 9 | 1 | -12 | 23.40  | 1.75 |
| 9 | 1 | -12 | 22.80  | 2.04 |
| 9 | 1 | -11 | 405.42 | 8.17 |
| 9 | 1 | -11 | 416.66 | 7.22 |
| 9 | 1 | -10 | 48.75  | 2.86 |
| 9 | 1 | -10 | 40.25  | 2.62 |
| 9 | 1 | -10 | 43.30  | 3.22 |
| 9 | 1 | -10 | 48.51  | 2.77 |
| 9 | 1 | -10 | 40.09  | 2.51 |
| 9 | 1 | -10 | 41.98  | 2.70 |
| 9 | 1 | -9  | 1.07   | 0.82 |
| 9 | 1 | -9  | 0.33   | 0.80 |
| 9 | 1 | -9  | 1.79   | 1.27 |
| 9 | 1 | -9  | 0.38   | 0.94 |
| 9 | 1 | -9  | -0.45  | 1.32 |
| 9 | 1 | -9  | 0.32   | 0.91 |
| 9 | 1 | -9  | 1.45   | 1.15 |
| 9 | 1 | -9  | 0.79   | 0.98 |
| 9 | 1 | -9  | 1.15   | 0.83 |
| 9 | 1 | -8  | 413.42 | 8.31 |
| 9 | 1 | -8  | 409.54 | 9.11 |
| 9 | 1 | -8  | 388.15 | 8.44 |

## CIF 31

|   |   |    |        |       |
|---|---|----|--------|-------|
| 9 | 1 | -8 | 415.15 | 10.07 |
| 9 | 1 | -8 | 438.37 | 8.85  |
| 9 | 1 | -8 | 422.72 | 9.44  |
| 9 | 1 | -8 | 395.57 | 8.42  |
| 9 | 1 | -8 | 409.74 | 9.08  |
| 9 | 1 | -8 | 402.10 | 8.79  |
| 9 | 1 | -7 | 219.82 | 5.93  |
| 9 | 1 | -7 | 243.52 | 7.09  |
| 9 | 1 | -7 | 212.06 | 6.05  |
| 9 | 1 | -7 | 219.45 | 7.07  |
| 9 | 1 | -7 | 229.24 | 6.24  |
| 9 | 1 | -7 | 222.61 | 7.50  |
| 9 | 1 | -7 | 244.13 | 7.21  |
| 9 | 1 | -7 | 205.01 | 5.88  |
| 9 | 1 | -7 | 219.89 | 6.52  |
| 9 | 1 | -7 | 212.21 | 6.34  |
| 9 | 1 | -7 | 214.43 | 6.45  |
| 9 | 1 | -6 | 170.76 | 5.19  |
| 9 | 1 | -6 | 172.73 | 6.43  |
| 9 | 1 | -6 | 176.71 | 6.63  |
| 9 | 1 | -6 | 165.63 | 5.03  |
| 9 | 1 | -6 | 174.16 | 5.35  |
| 9 | 1 | -6 | 167.94 | 5.99  |
| 9 | 1 | -6 | 173.87 | 5.33  |
| 9 | 1 | -6 | 152.87 | 8.24  |
| 9 | 1 | -6 | 167.96 | 6.16  |
| 9 | 1 | -6 | 168.35 | 5.58  |
| 9 | 1 | -6 | 167.34 | 5.83  |
| 9 | 1 | -5 | 409.18 | 8.22  |
| 9 | 1 | -5 | 406.09 | 10.24 |
| 9 | 1 | -5 | 425.11 | 8.86  |
| 9 | 1 | -5 | 354.09 | 8.49  |
| 9 | 1 | -5 | 410.43 | 8.31  |
| 9 | 1 | -5 | 470.60 | 10.64 |
| 9 | 1 | -5 | 410.94 | 9.97  |
| 9 | 1 | -5 | 396.05 | 8.64  |
| 9 | 1 | -5 | 412.27 | 9.59  |
| 9 | 1 | -4 | 0.07   | 3.05  |
| 9 | 1 | -4 | 1.60   | 0.89  |
| 9 | 1 | -4 | 0.99   | 0.98  |
| 9 | 1 | -4 | 1.08   | 0.84  |

## CIF 31

|   |   |     |        |      |
|---|---|-----|--------|------|
| 9 | 1 | -4  | -0.13  | 3.08 |
| 9 | 1 | -4  | 1.54   | 1.10 |
| 9 | 1 | -4  | 2.09   | 2.55 |
| 9 | 1 | -4  | 0.76   | 0.87 |
| 9 | 1 | -3  | 56.42  | 4.88 |
| 9 | 1 | -3  | 51.60  | 3.08 |
| 9 | 1 | -3  | 47.97  | 2.46 |
| 9 | 1 | -3  | 52.62  | 4.36 |
| 9 | 1 | -3  | 54.87  | 3.19 |
| 9 | 1 | -3  | 44.14  | 3.93 |
| 9 | 1 | -3  | 47.93  | 2.70 |
| 9 | 1 | -3  | 49.57  | 3.36 |
| 9 | 1 | -2  | 181.33 | 7.07 |
| 9 | 1 | -2  | 182.12 | 5.64 |
| 9 | 1 | -2  | 185.42 | 6.66 |
| 9 | 1 | -2  | 179.90 | 6.09 |
| 9 | 1 | -1  | 206.48 | 7.17 |
| 9 | 1 | -1  | 210.91 | 6.70 |
| 9 | 1 | -1  | 224.30 | 5.57 |
| 9 | 1 | -1  | 219.84 | 6.42 |
| 9 | 1 | 0   | 39.51  | 3.19 |
| 9 | 1 | 0   | 43.67  | 2.96 |
| 9 | 1 | 0   | 42.92  | 3.13 |
| 9 | 1 | 0   | 44.33  | 2.74 |
| 9 | 1 | 1   | 129.00 | 4.63 |
| 9 | 1 | 1   | 136.96 | 4.21 |
| 9 | 1 | 2   | 28.31  | 2.05 |
| 9 | 2 | -12 | 182.79 | 4.29 |
| 9 | 2 | -12 | 240.39 | 5.23 |
| 9 | 2 | -11 | 12.43  | 1.34 |
| 9 | 2 | -11 | 13.85  | 1.75 |
| 9 | 2 | -11 | 15.98  | 1.49 |
| 9 | 2 | -11 | 15.74  | 1.56 |
| 9 | 2 | -10 | 157.33 | 5.54 |
| 9 | 2 | -10 | 177.52 | 4.99 |
| 9 | 2 | -10 | 168.95 | 5.13 |
| 9 | 2 | -10 | 165.68 | 4.57 |
| 9 | 2 | -9  | 64.40  | 2.87 |
| 9 | 2 | -9  | 65.86  | 3.71 |
| 9 | 2 | -9  | 78.43  | 3.63 |
| 9 | 2 | -9  | 71.07  | 3.38 |



## CIF 31

|   |   |    |        |      |
|---|---|----|--------|------|
| 9 | 2 | -9 | 74.68  | 3.36 |
| 9 | 2 | -8 | 142.78 | 4.99 |
| 9 | 2 | -8 | 135.19 | 4.97 |
| 9 | 2 | -8 | 127.26 | 4.02 |
| 9 | 2 | -8 | 135.42 | 5.31 |
| 9 | 2 | -8 | 152.63 | 4.40 |
| 9 | 2 | -8 | 146.79 | 4.53 |
| 9 | 2 | -8 | 160.78 | 5.47 |
| 9 | 2 | -8 | 152.01 | 4.89 |
| 9 | 2 | -8 | 152.45 | 4.99 |
| 9 | 2 | -8 | 153.13 | 5.04 |
| 9 | 2 | -7 | 72.94  | 3.30 |
| 9 | 2 | -7 | 63.12  | 3.45 |
| 9 | 2 | -7 | 73.10  | 3.64 |
| 9 | 2 | -7 | 53.52  | 3.36 |
| 9 | 2 | -7 | 68.10  | 3.05 |
| 9 | 2 | -7 | 70.54  | 3.95 |
| 9 | 2 | -7 | 60.87  | 3.37 |
| 9 | 2 | -7 | 69.10  | 3.26 |
| 9 | 2 | -7 | 57.07  | 3.07 |
| 9 | 2 | -7 | 59.56  | 3.35 |
| 9 | 2 | -6 | 83.32  | 3.55 |
| 9 | 2 | -6 | 93.51  | 4.09 |
| 9 | 2 | -6 | 63.72  | 3.46 |
| 9 | 2 | -6 | 79.12  | 3.16 |
| 9 | 2 | -6 | 84.09  | 5.15 |
| 9 | 2 | -6 | 92.90  | 4.27 |
| 9 | 2 | -6 | 88.87  | 3.98 |
| 9 | 2 | -6 | 82.49  | 4.18 |
| 9 | 2 | -6 | 76.03  | 3.46 |
| 9 | 2 | -6 | 79.30  | 3.87 |
| 9 | 2 | -5 | 5.76   | 1.15 |
| 9 | 2 | -5 | 7.09   | 1.67 |
| 9 | 2 | -5 | 9.36   | 1.98 |
| 9 | 2 | -5 | 7.73   | 1.66 |
| 9 | 2 | -5 | 8.05   | 2.27 |
| 9 | 2 | -5 | 4.83   | 1.09 |
| 9 | 2 | -4 | 16.49  | 2.32 |
| 9 | 2 | -4 | 18.14  | 1.70 |
| 9 | 2 | -4 | 19.20  | 2.62 |
| 9 | 2 | -4 | 19.06  | 5.49 |

## CIF 31

|   |   |     |        |      |
|---|---|-----|--------|------|
| 9 | 2 | -4  | 21.92  | 2.36 |
| 9 | 2 | -4  | 14.52  | 2.56 |
| 9 | 2 | -4  | 19.72  | 2.09 |
| 9 | 2 | -3  | 58.92  | 3.46 |
| 9 | 2 | -3  | 56.09  | 3.56 |
| 9 | 2 | -3  | 63.76  | 3.52 |
| 9 | 2 | -3  | 57.42  | 3.25 |
| 9 | 2 | -2  | 23.89  | 2.34 |
| 9 | 2 | -2  | 23.68  | 2.52 |
| 9 | 2 | -2  | 26.21  | 2.23 |
| 9 | 2 | -2  | 23.80  | 2.87 |
| 9 | 2 | -2  | 23.58  | 2.14 |
| 9 | 2 | -1  | 1.07   | 1.27 |
| 9 | 2 | -1  | 1.45   | 0.88 |
| 9 | 2 | -1  | 1.48   | 1.57 |
| 9 | 2 | -1  | 1.30   | 0.87 |
| 9 | 2 | 0   | 9.47   | 1.65 |
| 9 | 2 | 1   | 13.32  | 1.60 |
| 9 | 2 | 1   | 17.63  | 1.60 |
| 9 | 3 | -12 | 31.38  | 1.71 |
| 9 | 3 | -11 | 55.63  | 2.32 |
| 9 | 3 | -10 | -0.14  | 0.80 |
| 9 | 3 | -9  | 109.97 | 4.03 |
| 9 | 3 | -9  | 96.59  | 3.34 |
| 9 | 3 | -9  | 105.63 | 3.79 |
| 9 | 3 | -8  | 185.55 | 5.17 |
| 9 | 3 | -8  | 178.43 | 4.56 |
| 9 | 3 | -8  | 184.34 | 5.41 |
| 9 | 3 | -8  | 152.62 | 4.65 |
| 9 | 3 | -8  | 136.88 | 4.24 |
| 9 | 3 | -8  | 159.84 | 4.94 |
| 9 | 3 | -7  | 73.56  | 3.06 |
| 9 | 3 | -7  | 79.65  | 3.43 |
| 9 | 3 | -7  | 79.39  | 3.27 |
| 9 | 3 | -7  | 78.88  | 3.55 |
| 9 | 3 | -7  | 78.92  | 3.32 |
| 9 | 3 | -7  | 73.18  | 3.48 |
| 9 | 3 | -6  | 83.04  | 3.49 |
| 9 | 3 | -6  | 70.56  | 3.56 |
| 9 | 3 | -6  | 78.28  | 3.67 |
| 9 | 3 | -6  | 76.99  | 3.49 |

## CIF 31

|   |   |     |        |      |
|---|---|-----|--------|------|
| 9 | 3 | -5  | 294.22 | 6.47 |
| 9 | 3 | -5  | 276.99 | 7.03 |
| 9 | 3 | -5  | 269.09 | 7.02 |
| 9 | 3 | -5  | 290.96 | 7.10 |
| 9 | 3 | -5  | 262.84 | 6.71 |
| 9 | 3 | -4  | 54.31  | 2.61 |
| 9 | 3 | -4  | 54.67  | 3.26 |
| 9 | 3 | -4  | 55.76  | 3.15 |
| 9 | 3 | -4  | 49.72  | 2.81 |
| 9 | 3 | -3  | 40.37  | 2.06 |
| 9 | 3 | -3  | 47.37  | 3.00 |
| 9 | 3 | -3  | 45.58  | 2.85 |
| 9 | 3 | -3  | 45.94  | 2.85 |
| 9 | 3 | -3  | 41.59  | 2.48 |
| 9 | 3 | -2  | 25.89  | 2.11 |
| 9 | 3 | -2  | 31.06  | 2.34 |
| 9 | 3 | -2  | 27.09  | 2.12 |
| 9 | 3 | -2  | 25.56  | 1.82 |
| 9 | 3 | -1  | 2.71   | 0.89 |
| 9 | 3 | -1  | 2.11   | 0.92 |
| 9 | 3 | -1  | 2.51   | 0.89 |
| 9 | 3 | 0   | 75.64  | 2.86 |
| 9 | 3 | 1   | 1.35   | 0.50 |
| 9 | 4 | -11 | 13.20  | 1.08 |
| 9 | 4 | -11 | 13.98  | 1.04 |
| 9 | 4 | -10 | 5.61   | 0.94 |
| 9 | 4 | -10 | 5.67   | 0.98 |
| 9 | 4 | -9  | 272.71 | 5.80 |
| 9 | 4 | -8  | 44.07  | 2.02 |
| 9 | 4 | -7  | 10.42  | 1.15 |
| 9 | 4 | -7  | 10.56  | 1.27 |
| 9 | 4 | -7  | 8.26   | 1.30 |
| 9 | 4 | -7  | 7.89   | 1.20 |
| 9 | 4 | -7  | 11.62  | 1.26 |
| 9 | 4 | -6  | 136.87 | 3.95 |
| 9 | 4 | -6  | 120.73 | 3.65 |
| 9 | 4 | -6  | 129.49 | 3.97 |
| 9 | 4 | -6  | 130.66 | 4.14 |
| 9 | 4 | -6  | 121.90 | 4.04 |
| 9 | 4 | -6  | 128.50 | 3.98 |
| 9 | 4 | -6  | 111.50 | 3.85 |

## CIF 31

|    |     |    |        |      |
|----|-----|----|--------|------|
| 9  | 4   | -5 | 8.56   | 1.43 |
| 9  | 4   | -5 | 9.93   | 1.36 |
| 9  | 4   | -5 | 9.41   | 1.32 |
| 9  | 4   | -5 | 7.68   | 1.22 |
| 9  | 4   | -4 | 5.42   | 1.13 |
| 9  | 4   | -4 | 4.44   | 1.00 |
| 9  | 4   | -4 | 5.31   | 1.09 |
| 9  | 4   | -4 | 4.70   | 1.02 |
| 9  | 4   | -3 | 0.15   | 0.62 |
| 9  | 4   | -2 | 42.50  | 2.13 |
| 9  | 4   | -2 | 37.94  | 2.03 |
| 9  | 4   | -1 | 112.86 | 3.17 |
| 9  | 4   | -1 | 99.85  | 2.80 |
| 9  | 5   | -8 | 77.84  | 2.47 |
| 9  | 5   | -7 | 199.41 | 3.91 |
| 9  | 5   | -7 | 176.31 | 3.91 |
| 9  | 5   | -6 | 49.22  | 1.90 |
| 9  | 5   | -6 | 49.98  | 2.03 |
| 9  | 5   | -5 | 3.74   | 0.74 |
| 9  | 5   | -5 | 3.67   | 0.76 |
| 9  | 5   | -4 | 4.50   | 0.78 |
| 10 | -11 | -2 | 292.10 | 4.71 |
| 10 | -11 | -2 | 435.83 | 5.25 |
| 10 | -11 | -1 | 3.30   | 0.62 |
| 10 | -11 | 0  | 48.92  | 1.68 |
| 10 | -11 | 0  | 53.58  | 1.81 |
| 10 | -11 | 1  | 26.71  | 1.22 |
| 10 | -11 | 1  | 27.50  | 1.28 |
| 10 | -11 | 1  | 28.11  | 1.30 |
| 10 | -11 | 1  | 30.60  | 1.14 |
| 10 | -10 | -6 | 47.85  | 1.70 |
| 10 | -10 | -5 | 95.91  | 2.70 |
| 10 | -10 | -5 | 93.16  | 2.03 |
| 10 | -10 | -4 | 3.98   | 0.68 |
| 10 | -10 | -4 | 4.30   | 0.86 |
| 10 | -10 | -4 | 3.11   | 0.69 |
| 10 | -10 | -3 | 403.19 | 5.93 |
| 10 | -10 | -3 | 370.52 | 6.22 |
| 10 | -10 | -3 | 345.06 | 6.18 |
| 10 | -10 | -3 | 306.03 | 5.44 |
| 10 | -10 | -2 | 37.22  | 1.92 |

## CIF 31

|    |     |    |        |      |
|----|-----|----|--------|------|
| 10 | -10 | -2 | 40.03  | 1.99 |
| 10 | -10 | -2 | 39.91  | 2.00 |
| 10 | -10 | -1 | 18.60  | 1.49 |
| 10 | -10 | -1 | 16.26  | 1.39 |
| 10 | -10 | -1 | 15.50  | 1.30 |
| 10 | -10 | -1 | 19.32  | 1.46 |
| 10 | -10 | 0  | 258.91 | 5.44 |
| 10 | -10 | 0  | 359.05 | 6.26 |
| 10 | -10 | 0  | 360.82 | 6.24 |
| 10 | -10 | 0  | 288.83 | 5.36 |
| 10 | -10 | 0  | 354.94 | 6.03 |
| 10 | -10 | 1  | 1.39   | 0.60 |
| 10 | -10 | 1  | 3.51   | 1.18 |
| 10 | -10 | 1  | 2.02   | 0.78 |
| 10 | -10 | 1  | 2.02   | 0.96 |
| 10 | -10 | 1  | 2.75   | 0.75 |
| 10 | -10 | 2  | 8.66   | 1.42 |
| 10 | -10 | 2  | 8.06   | 0.91 |
| 10 | -10 | 2  | 9.29   | 0.78 |
| 10 | -10 | 3  | 181.22 | 3.78 |
| 10 | -10 | 3  | 167.38 | 3.50 |
| 10 | -9  | -7 | 144.89 | 3.49 |
| 10 | -9  | -7 | 152.85 | 3.62 |
| 10 | -9  | -6 | 1.59   | 0.76 |
| 10 | -9  | -6 | 0.94   | 0.67 |
| 10 | -9  | -6 | 1.66   | 0.71 |
| 10 | -9  | -5 | 2.58   | 0.77 |
| 10 | -9  | -5 | 2.11   | 0.83 |
| 10 | -9  | -5 | 3.24   | 0.84 |
| 10 | -9  | -4 | 221.82 | 4.86 |
| 10 | -9  | -4 | 283.90 | 5.87 |
| 10 | -9  | -4 | 288.13 | 5.91 |
| 10 | -9  | -4 | 233.65 | 5.50 |
| 10 | -9  | -4 | 253.83 | 5.68 |
| 10 | -9  | -4 | 273.31 | 5.73 |
| 10 | -9  | -4 | 252.62 | 5.40 |
| 10 | -9  | -3 | 192.60 | 4.96 |
| 10 | -9  | -3 | 195.61 | 4.94 |
| 10 | -9  | -3 | 188.07 | 4.54 |
| 10 | -9  | -3 | 165.21 | 4.48 |
| 10 | -9  | -3 | 181.64 | 4.79 |

## CIF 31

|    |    |    |        |      |
|----|----|----|--------|------|
| 10 | -9 | -3 | 167.89 | 4.69 |
| 10 | -9 | -3 | 186.22 | 4.76 |
| 10 | -9 | -3 | 171.98 | 4.34 |
| 10 | -9 | -2 | 4.84   | 2.01 |
| 10 | -9 | -2 | 3.15   | 1.17 |
| 10 | -9 | -2 | 3.55   | 1.04 |
| 10 | -9 | -2 | 2.73   | 1.14 |
| 10 | -9 | -2 | 2.95   | 0.86 |
| 10 | -9 | -2 | 4.07   | 0.99 |
| 10 | -9 | -2 | 3.63   | 0.96 |
| 10 | -9 | -2 | 3.55   | 0.74 |
| 10 | -9 | -1 | 311.78 | 6.57 |
| 10 | -9 | -1 | 302.99 | 6.35 |
| 10 | -9 | -1 | 279.45 | 6.00 |
| 10 | -9 | -1 | 274.06 | 6.23 |
| 10 | -9 | -1 | 290.78 | 6.08 |
| 10 | -9 | 0  | 109.56 | 3.99 |
| 10 | -9 | 0  | 101.43 | 3.79 |
| 10 | -9 | 0  | 81.48  | 3.02 |
| 10 | -9 | 0  | 90.93  | 3.44 |
| 10 | -9 | 0  | 73.34  | 3.42 |
| 10 | -9 | 0  | 104.10 | 3.37 |
| 10 | -9 | 1  | 150.65 | 4.14 |
| 10 | -9 | 1  | 134.09 | 3.21 |
| 10 | -9 | 1  | 112.78 | 3.42 |
| 10 | -9 | 1  | 107.21 | 3.92 |
| 10 | -9 | 1  | 130.26 | 3.67 |
| 10 | -9 | 2  | 24.59  | 1.29 |
| 10 | -9 | 2  | 22.02  | 1.65 |
| 10 | -9 | 2  | 25.21  | 1.58 |
| 10 | -9 | 3  | 7.54   | 1.69 |
| 10 | -9 | 3  | 7.38   | 1.02 |
| 10 | -9 | 3  | 6.01   | 0.81 |
| 10 | -9 | 3  | 5.47   | 0.57 |
| 10 | -9 | 4  | 51.86  | 2.23 |
| 10 | -9 | 4  | 49.32  | 1.82 |
| 10 | -8 | -9 | 0.18   | 0.42 |
| 10 | -8 | -9 | 0.11   | 0.41 |
| 10 | -8 | -8 | 82.28  | 2.86 |
| 10 | -8 | -7 | 43.49  | 2.24 |
| 10 | -8 | -7 | 45.77  | 2.21 |

## CIF 31

|    |    |    |        |      |
|----|----|----|--------|------|
| 10 | -8 | -7 | 47.47  | 2.33 |
| 10 | -8 | -6 | 270.37 | 5.61 |
| 10 | -8 | -6 | 287.11 | 6.45 |
| 10 | -8 | -6 | 264.28 | 5.96 |
| 10 | -8 | -6 | 260.07 | 5.94 |
| 10 | -8 | -6 | 285.73 | 5.95 |
| 10 | -8 | -6 | 282.09 | 6.14 |
| 10 | -8 | -5 | 56.81  | 2.70 |
| 10 | -8 | -5 | 48.12  | 2.13 |
| 10 | -8 | -5 | 60.27  | 2.87 |
| 10 | -8 | -5 | 56.33  | 2.58 |
| 10 | -8 | -5 | 49.78  | 2.61 |
| 10 | -8 | -5 | 53.10  | 2.71 |
| 10 | -8 | -5 | 60.24  | 2.75 |
| 10 | -8 | -5 | 62.04  | 2.83 |
| 10 | -8 | -4 | 98.40  | 3.86 |
| 10 | -8 | -4 | 112.76 | 3.82 |
| 10 | -8 | -4 | 121.34 | 4.20 |
| 10 | -8 | -4 | 123.04 | 4.01 |
| 10 | -8 | -4 | 111.53 | 3.87 |
| 10 | -8 | -4 | 105.08 | 3.92 |
| 10 | -8 | -4 | 106.88 | 3.75 |
| 10 | -8 | -4 | 115.17 | 3.84 |
| 10 | -8 | -3 | 7.16   | 1.34 |
| 10 | -8 | -3 | 8.79   | 2.63 |
| 10 | -8 | -3 | 7.34   | 1.55 |
| 10 | -8 | -3 | 5.41   | 1.07 |
| 10 | -8 | -3 | 7.01   | 1.25 |
| 10 | -8 | -3 | 7.38   | 2.05 |
| 10 | -8 | -3 | 6.20   | 1.21 |
| 10 | -8 | -3 | 7.03   | 1.09 |
| 10 | -8 | -2 | 451.38 | 8.79 |
| 10 | -8 | -2 | 515.06 | 9.01 |
| 10 | -8 | -2 | 504.28 | 9.21 |
| 10 | -8 | -2 | 446.25 | 8.23 |
| 10 | -8 | -2 | 434.47 | 8.85 |
| 10 | -8 | -2 | 407.20 | 8.73 |
| 10 | -8 | -2 | 493.88 | 8.53 |
| 10 | -8 | -2 | 433.16 | 7.40 |
| 10 | -8 | -1 | 5.55   | 1.66 |
| 10 | -8 | -1 | 4.95   | 1.18 |

## CIF 31

|    |    |     |        |      |
|----|----|-----|--------|------|
| 10 | -8 | -1  | 7.19   | 1.85 |
| 10 | -8 | -1  | 4.28   | 0.99 |
| 10 | -8 | -1  | 2.19   | 2.12 |
| 10 | -8 | -1  | 4.51   | 1.06 |
| 10 | -8 | 0   | 28.98  | 2.42 |
| 10 | -8 | 0   | 38.18  | 2.98 |
| 10 | -8 | 0   | 36.89  | 2.33 |
| 10 | -8 | 0   | 32.62  | 1.71 |
| 10 | -8 | 0   | 31.43  | 1.95 |
| 10 | -8 | 0   | 31.94  | 2.24 |
| 10 | -8 | 0   | 29.92  | 2.68 |
| 10 | -8 | 0   | 36.43  | 2.13 |
| 10 | -8 | 1   | 120.70 | 3.64 |
| 10 | -8 | 1   | 124.16 | 4.18 |
| 10 | -8 | 1   | 124.81 | 4.55 |
| 10 | -8 | 1   | 128.24 | 3.78 |
| 10 | -8 | 2   | 132.53 | 3.92 |
| 10 | -8 | 2   | 111.72 | 3.77 |
| 10 | -8 | 2   | 117.02 | 4.23 |
| 10 | -8 | 2   | 128.23 | 3.53 |
| 10 | -8 | 3   | 67.01  | 2.59 |
| 10 | -8 | 3   | 60.68  | 2.19 |
| 10 | -8 | 4   | 76.22  | 2.40 |
| 10 | -8 | 5   | 0.10   | 0.75 |
| 10 | -7 | -10 | 1.52   | 0.56 |
| 10 | -7 | -10 | 1.84   | 0.35 |
| 10 | -7 | -9  | 30.66  | 1.88 |
| 10 | -7 | -9  | 27.87  | 1.20 |
| 10 | -7 | -9  | 30.81  | 1.78 |
| 10 | -7 | -8  | 0.66   | 0.64 |
| 10 | -7 | -8  | 0.66   | 0.86 |
| 10 | -7 | -8  | 0.34   | 0.62 |
| 10 | -7 | -8  | 0.46   | 0.63 |
| 10 | -7 | -8  | 0.35   | 0.46 |
| 10 | -7 | -7  | 32.10  | 2.09 |
| 10 | -7 | -7  | 28.21  | 2.19 |
| 10 | -7 | -7  | 26.25  | 1.91 |
| 10 | -7 | -7  | 30.48  | 2.10 |
| 10 | -7 | -7  | 29.98  | 1.95 |
| 10 | -7 | -7  | 33.16  | 2.18 |
| 10 | -7 | -6  | 4.25   | 1.12 |



## CIF 31

|    |    |    |        |      |
|----|----|----|--------|------|
| 10 | -7 | -6 | 4.54   | 1.02 |
| 10 | -7 | -6 | 4.14   | 1.00 |
| 10 | -7 | -6 | 3.12   | 0.98 |
| 10 | -7 | -6 | 4.66   | 1.05 |
| 10 | -7 | -6 | 4.77   | 1.14 |
| 10 | -7 | -5 | 40.04  | 2.50 |
| 10 | -7 | -5 | 39.29  | 2.64 |
| 10 | -7 | -5 | 44.98  | 2.76 |
| 10 | -7 | -5 | 42.12  | 2.56 |
| 10 | -7 | -5 | 45.89  | 2.65 |
| 10 | -7 | -5 | 39.81  | 2.40 |
| 10 | -7 | -5 | 37.47  | 2.43 |
| 10 | -7 | -5 | 40.68  | 2.41 |
| 10 | -7 | -5 | 43.52  | 2.56 |
| 10 | -7 | -4 | 34.28  | 2.45 |
| 10 | -7 | -4 | 34.88  | 3.17 |
| 10 | -7 | -4 | 32.20  | 2.43 |
| 10 | -7 | -4 | 40.66  | 2.54 |
| 10 | -7 | -4 | 37.21  | 2.67 |
| 10 | -7 | -4 | 31.57  | 2.18 |
| 10 | -7 | -4 | 31.60  | 3.12 |
| 10 | -7 | -4 | 31.16  | 2.95 |
| 10 | -7 | -4 | 34.65  | 2.24 |
| 10 | -7 | -4 | 33.42  | 2.25 |
| 10 | -7 | -3 | 337.89 | 7.66 |
| 10 | -7 | -3 | 294.21 | 8.11 |
| 10 | -7 | -3 | 364.83 | 7.80 |
| 10 | -7 | -3 | 343.13 | 7.55 |
| 10 | -7 | -3 | 352.22 | 7.94 |
| 10 | -7 | -3 | 324.59 | 7.00 |
| 10 | -7 | -3 | 298.44 | 7.86 |
| 10 | -7 | -3 | 303.77 | 7.34 |
| 10 | -7 | -3 | 289.26 | 7.55 |
| 10 | -7 | -3 | 309.35 | 6.71 |
| 10 | -7 | -3 | 311.96 | 6.61 |
| 10 | -7 | -2 | 4.23   | 1.57 |
| 10 | -7 | -2 | 5.28   | 1.78 |
| 10 | -7 | -2 | 5.53   | 1.32 |
| 10 | -7 | -2 | 4.12   | 1.84 |
| 10 | -7 | -2 | 4.97   | 1.04 |
| 10 | -7 | -2 | 4.03   | 1.17 |

## CIF 31

|    |    |     |        |      |
|----|----|-----|--------|------|
| 10 | -7 | -2  | 4.88   | 2.36 |
| 10 | -7 | -2  | 5.09   | 1.11 |
| 10 | -7 | -1  | 466.59 | 9.81 |
| 10 | -7 | -1  | 470.12 | 8.98 |
| 10 | -7 | -1  | 473.08 | 8.71 |
| 10 | -7 | -1  | 462.20 | 9.27 |
| 10 | -7 | -1  | 352.65 | 7.27 |
| 10 | -7 | -1  | 394.64 | 8.46 |
| 10 | -7 | -1  | 366.95 | 8.80 |
| 10 | -7 | -1  | 408.24 | 7.65 |
| 10 | -7 | 0   | 16.01  | 1.92 |
| 10 | -7 | 0   | 20.15  | 2.19 |
| 10 | -7 | 0   | 17.96  | 2.15 |
| 10 | -7 | 0   | 19.64  | 1.81 |
| 10 | -7 | 0   | 15.15  | 1.42 |
| 10 | -7 | 0   | 16.87  | 1.74 |
| 10 | -7 | 0   | 15.02  | 2.03 |
| 10 | -7 | 0   | 16.23  | 1.50 |
| 10 | -7 | 1   | 199.30 | 5.68 |
| 10 | -7 | 1   | 211.62 | 5.57 |
| 10 | -7 | 1   | 206.90 | 6.18 |
| 10 | -7 | 1   | 205.03 | 4.86 |
| 10 | -7 | 2   | 77.87  | 3.20 |
| 10 | -7 | 2   | 85.57  | 3.79 |
| 10 | -7 | 2   | 77.56  | 2.67 |
| 10 | -7 | 3   | 20.20  | 1.48 |
| 10 | -7 | 3   | 15.20  | 1.35 |
| 10 | -7 | 4   | 12.05  | 1.01 |
| 10 | -7 | 5   | 4.75   | 0.76 |
| 10 | -6 | -11 | 0.71   | 0.46 |
| 10 | -6 | -11 | 0.36   | 0.31 |
| 10 | -6 | -10 | 41.23  | 1.78 |
| 10 | -6 | -10 | 51.25  | 1.71 |
| 10 | -6 | -9  | 159.64 | 4.33 |
| 10 | -6 | -9  | 154.45 | 4.20 |
| 10 | -6 | -9  | 150.82 | 4.46 |
| 10 | -6 | -8  | 14.40  | 1.56 |
| 10 | -6 | -8  | 14.62  | 1.37 |
| 10 | -6 | -8  | 14.46  | 1.49 |
| 10 | -6 | -8  | 13.52  | 1.52 |
| 10 | -6 | -8  | 16.81  | 1.67 |

## CIF 31

|    |    |    |        |       |
|----|----|----|--------|-------|
| 10 | -6 | -7 | 16.94  | 1.69  |
| 10 | -6 | -7 | 19.58  | 1.91  |
| 10 | -6 | -7 | 16.87  | 1.62  |
| 10 | -6 | -7 | 18.17  | 1.96  |
| 10 | -6 | -7 | 16.05  | 1.59  |
| 10 | -6 | -7 | 17.91  | 1.62  |
| 10 | -6 | -7 | 18.70  | 1.84  |
| 10 | -6 | -6 | 6.87   | 1.25  |
| 10 | -6 | -6 | 8.81   | 1.54  |
| 10 | -6 | -6 | 6.92   | 1.39  |
| 10 | -6 | -6 | 9.05   | 1.37  |
| 10 | -6 | -6 | 8.95   | 1.39  |
| 10 | -6 | -6 | 7.49   | 1.22  |
| 10 | -6 | -6 | 8.29   | 1.37  |
| 10 | -6 | -6 | 8.21   | 1.38  |
| 10 | -6 | -6 | 8.03   | 1.38  |
| 10 | -6 | -6 | 7.61   | 1.22  |
| 10 | -6 | -6 | 9.33   | 1.39  |
| 10 | -6 | -5 | 460.20 | 9.30  |
| 10 | -6 | -5 | 495.09 | 10.03 |
| 10 | -6 | -5 | 481.38 | 9.50  |
| 10 | -6 | -5 | 491.81 | 9.31  |
| 10 | -6 | -5 | 472.52 | 9.05  |
| 10 | -6 | -5 | 485.65 | 9.56  |
| 10 | -6 | -5 | 426.73 | 8.37  |
| 10 | -6 | -5 | 476.01 | 9.36  |
| 10 | -6 | -5 | 450.65 | 9.16  |
| 10 | -6 | -5 | 445.51 | 9.46  |
| 10 | -6 | -5 | 445.76 | 8.33  |
| 10 | -6 | -5 | 466.11 | 8.91  |
| 10 | -6 | -4 | 45.02  | 2.94  |
| 10 | -6 | -4 | 47.62  | 4.02  |
| 10 | -6 | -4 | 50.91  | 2.96  |
| 10 | -6 | -4 | 53.03  | 2.93  |
| 10 | -6 | -4 | 49.04  | 3.18  |
| 10 | -6 | -4 | 47.90  | 2.64  |
| 10 | -6 | -4 | 44.60  | 3.91  |
| 10 | -6 | -4 | 49.08  | 2.94  |
| 10 | -6 | -4 | 46.69  | 3.68  |
| 10 | -6 | -4 | 48.71  | 2.56  |
| 10 | -6 | -4 | 46.96  | 2.64  |

## CIF 31

|    |    |    |        |      |
|----|----|----|--------|------|
| 10 | -6 | -3 | 18.06  | 2.05 |
| 10 | -6 | -3 | 18.83  | 1.86 |
| 10 | -6 | -3 | 18.76  | 2.46 |
| 10 | -6 | -3 | 14.40  | 1.49 |
| 10 | -6 | -3 | 12.98  | 3.05 |
| 10 | -6 | -3 | 15.67  | 1.77 |
| 10 | -6 | -3 | 15.20  | 3.01 |
| 10 | -6 | -3 | 16.50  | 1.60 |
| 10 | -6 | -3 | 14.13  | 1.49 |
| 10 | -6 | -2 | 8.74   | 1.68 |
| 10 | -6 | -2 | 12.09  | 2.55 |
| 10 | -6 | -2 | 10.71  | 1.81 |
| 10 | -6 | -2 | 11.58  | 1.55 |
| 10 | -6 | -2 | 8.03   | 2.02 |
| 10 | -6 | -2 | 9.94   | 1.23 |
| 10 | -6 | -2 | 9.07   | 1.44 |
| 10 | -6 | -2 | 8.80   | 2.40 |
| 10 | -6 | -2 | 8.98   | 1.23 |
| 10 | -6 | -1 | 123.20 | 4.68 |
| 10 | -6 | -1 | 150.90 | 4.58 |
| 10 | -6 | -1 | 148.17 | 5.73 |
| 10 | -6 | -1 | 148.77 | 4.87 |
| 10 | -6 | -1 | 139.11 | 4.51 |
| 10 | -6 | -1 | 118.95 | 4.41 |
| 10 | -6 | -1 | 120.01 | 5.05 |
| 10 | -6 | -1 | 117.58 | 3.72 |
| 10 | -6 | 0  | 24.37  | 2.13 |
| 10 | -6 | 0  | 33.99  | 2.90 |
| 10 | -6 | 0  | 27.19  | 2.20 |
| 10 | -6 | 0  | 27.19  | 2.03 |
| 10 | -6 | 0  | 26.97  | 2.12 |
| 10 | -6 | 0  | 26.94  | 2.51 |
| 10 | -6 | 0  | 23.85  | 1.65 |
| 10 | -6 | 1  | 131.45 | 4.54 |
| 10 | -6 | 1  | 132.75 | 4.31 |
| 10 | -6 | 1  | 138.56 | 4.18 |
| 10 | -6 | 1  | 121.12 | 4.12 |
| 10 | -6 | 2  | 0.56   | 0.67 |
| 10 | -6 | 2  | 0.59   | 0.65 |
| 10 | -6 | 2  | -0.24  | 0.90 |
| 10 | -6 | 3  | 79.02  | 2.57 |

## CIF 31

|    |    |     |        |      |
|----|----|-----|--------|------|
| 10 | -6 | 3   | 76.17  | 3.42 |
| 10 | -6 | 4   | 72.07  | 2.30 |
| 10 | -5 | -11 | 2.55   | 0.63 |
| 10 | -5 | -11 | 3.22   | 0.78 |
| 10 | -5 | -10 | 1.31   | 0.81 |
| 10 | -5 | -10 | 0.18   | 0.76 |
| 10 | -5 | -9  | 131.36 | 4.34 |
| 10 | -5 | -9  | 126.93 | 3.79 |
| 10 | -5 | -9  | 126.64 | 4.34 |
| 10 | -5 | -9  | 104.57 | 3.52 |
| 10 | -5 | -9  | 104.06 | 3.87 |
| 10 | -5 | -8  | 20.47  | 1.85 |
| 10 | -5 | -8  | 22.57  | 2.06 |
| 10 | -5 | -8  | 23.25  | 1.92 |
| 10 | -5 | -8  | 22.83  | 2.05 |
| 10 | -5 | -8  | 21.58  | 1.71 |
| 10 | -5 | -8  | 22.09  | 1.95 |
| 10 | -5 | -8  | 22.12  | 1.79 |
| 10 | -5 | -8  | 26.64  | 2.11 |
| 10 | -5 | -7  | 19.53  | 1.87 |
| 10 | -5 | -7  | 20.97  | 2.10 |
| 10 | -5 | -7  | 18.92  | 1.84 |
| 10 | -5 | -7  | 21.13  | 2.04 |
| 10 | -5 | -7  | 18.79  | 1.65 |
| 10 | -5 | -7  | 20.69  | 1.89 |
| 10 | -5 | -7  | 19.12  | 1.87 |
| 10 | -5 | -7  | 19.05  | 1.60 |
| 10 | -5 | -7  | 20.74  | 1.93 |
| 10 | -5 | -6  | 44.21  | 4.22 |
| 10 | -5 | -6  | 42.07  | 3.01 |
| 10 | -5 | -6  | 49.88  | 3.17 |
| 10 | -5 | -6  | 45.95  | 2.68 |
| 10 | -5 | -6  | 52.48  | 3.08 |
| 10 | -5 | -6  | 40.59  | 2.35 |
| 10 | -5 | -6  | 48.92  | 3.17 |
| 10 | -5 | -6  | 41.65  | 2.69 |
| 10 | -5 | -6  | 46.00  | 2.99 |
| 10 | -5 | -6  | 45.00  | 2.39 |
| 10 | -5 | -6  | 45.24  | 2.71 |
| 10 | -5 | -5  | 41.79  | 2.81 |
| 10 | -5 | -5  | 61.38  | 3.88 |

## CIF 31

|    |    |    |        |      |
|----|----|----|--------|------|
| 10 | -5 | -5 | 51.43  | 3.06 |
| 10 | -5 | -5 | 51.48  | 4.04 |
| 10 | -5 | -5 | 52.14  | 3.00 |
| 10 | -5 | -5 | 56.77  | 2.96 |
| 10 | -5 | -5 | 52.41  | 3.21 |
| 10 | -5 | -5 | 36.61  | 5.13 |
| 10 | -5 | -5 | 49.11  | 2.57 |
| 10 | -5 | -5 | 54.91  | 4.14 |
| 10 | -5 | -5 | 59.54  | 3.16 |
| 10 | -5 | -5 | 55.75  | 3.76 |
| 10 | -5 | -5 | 50.28  | 2.49 |
| 10 | -5 | -5 | 51.31  | 2.83 |
| 10 | -5 | -4 | 25.76  | 2.37 |
| 10 | -5 | -4 | 14.00  | 4.83 |
| 10 | -5 | -4 | 22.13  | 2.10 |
| 10 | -5 | -4 | 22.83  | 2.06 |
| 10 | -5 | -4 | 25.59  | 2.13 |
| 10 | -5 | -4 | 24.32  | 3.79 |
| 10 | -5 | -4 | 23.29  | 2.08 |
| 10 | -5 | -4 | 23.71  | 3.33 |
| 10 | -5 | -4 | 25.60  | 1.81 |
| 10 | -5 | -4 | 22.19  | 1.87 |
| 10 | -5 | -3 | 115.09 | 4.55 |
| 10 | -5 | -3 | 105.73 | 6.13 |
| 10 | -5 | -3 | 118.32 | 4.55 |
| 10 | -5 | -3 | 127.01 | 4.51 |
| 10 | -5 | -3 | 122.73 | 4.28 |
| 10 | -5 | -3 | 104.26 | 5.25 |
| 10 | -5 | -3 | 111.22 | 4.32 |
| 10 | -5 | -3 | 107.41 | 5.36 |
| 10 | -5 | -3 | 105.72 | 3.47 |
| 10 | -5 | -2 | 3.11   | 1.24 |
| 10 | -5 | -2 | 3.87   | 2.18 |
| 10 | -5 | -2 | 2.23   | 0.99 |
| 10 | -5 | -2 | 2.11   | 1.12 |
| 10 | -5 | -2 | 3.23   | 1.04 |
| 10 | -5 | -2 | 2.89   | 1.45 |
| 10 | -5 | -2 | 2.87   | 1.01 |
| 10 | -5 | -2 | 2.60   | 1.74 |
| 10 | -5 | -1 | 22.07  | 2.09 |
| 10 | -5 | -1 | 29.96  | 2.95 |

## CIF 31

|    |    |     |        |      |
|----|----|-----|--------|------|
| 10 | -5 | -1  | 25.88  | 2.08 |
| 10 | -5 | -1  | 25.71  | 1.96 |
| 10 | -5 | -1  | 26.57  | 2.34 |
| 10 | -5 | -1  | 20.77  | 1.86 |
| 10 | -5 | 0   | 238.32 | 6.32 |
| 10 | -5 | 0   | 309.43 | 8.61 |
| 10 | -5 | 0   | 272.46 | 6.22 |
| 10 | -5 | 0   | 274.89 | 5.95 |
| 10 | -5 | 0   | 207.18 | 5.62 |
| 10 | -5 | 0   | 235.22 | 7.03 |
| 10 | -5 | 1   | 0.88   | 0.76 |
| 10 | -5 | 1   | 1.05   | 1.19 |
| 10 | -5 | 1   | 1.13   | 0.83 |
| 10 | -5 | 1   | 0.77   | 0.65 |
| 10 | -5 | 1   | 0.96   | 0.73 |
| 10 | -5 | 1   | 0.81   | 1.00 |
| 10 | -5 | 2   | 2.97   | 0.82 |
| 10 | -5 | 2   | 1.31   | 0.94 |
| 10 | -5 | 3   | 18.10  | 1.74 |
| 10 | -5 | 4   | 8.14   | 0.93 |
| 10 | -4 | -12 | 159.91 | 3.88 |
| 10 | -4 | -12 | 144.77 | 3.47 |
| 10 | -4 | -11 | 37.08  | 2.06 |
| 10 | -4 | -11 | 34.32  | 1.99 |
| 10 | -4 | -10 | 50.36  | 2.71 |
| 10 | -4 | -10 | 45.03  | 2.32 |
| 10 | -4 | -10 | 52.77  | 2.68 |
| 10 | -4 | -10 | 45.69  | 2.49 |
| 10 | -4 | -9  | 21.68  | 2.06 |
| 10 | -4 | -9  | 18.65  | 1.76 |
| 10 | -4 | -9  | 18.39  | 1.86 |
| 10 | -4 | -9  | 17.59  | 1.74 |
| 10 | -4 | -9  | 15.58  | 1.59 |
| 10 | -4 | -8  | 32.33  | 2.01 |
| 10 | -4 | -8  | 32.97  | 2.53 |
| 10 | -4 | -8  | 35.38  | 2.44 |
| 10 | -4 | -8  | 36.21  | 2.50 |
| 10 | -4 | -8  | 33.16  | 2.40 |
| 10 | -4 | -8  | 31.22  | 2.36 |
| 10 | -4 | -8  | 35.46  | 2.47 |
| 10 | -4 | -7  | 174.43 | 5.45 |

## CIF 31

|    |    |    |        |       |
|----|----|----|--------|-------|
| 10 | -4 | -7 | 176.26 | 5.40  |
| 10 | -4 | -7 | 157.60 | 5.49  |
| 10 | -4 | -7 | 184.15 | 5.64  |
| 10 | -4 | -7 | 167.45 | 5.32  |
| 10 | -4 | -7 | 182.57 | 5.33  |
| 10 | -4 | -7 | 181.99 | 5.48  |
| 10 | -4 | -7 | 152.98 | 5.09  |
| 10 | -4 | -7 | 157.66 | 5.35  |
| 10 | -4 | -7 | 165.53 | 5.22  |
| 10 | -4 | -6 | 54.82  | 3.13  |
| 10 | -4 | -6 | 62.73  | 3.73  |
| 10 | -4 | -6 | 58.82  | 4.86  |
| 10 | -4 | -6 | 64.16  | 3.82  |
| 10 | -4 | -6 | 51.71  | 2.94  |
| 10 | -4 | -6 | 58.99  | 3.51  |
| 10 | -4 | -6 | 56.94  | 3.06  |
| 10 | -4 | -5 | 86.45  | 3.92  |
| 10 | -4 | -5 | 68.40  | 6.37  |
| 10 | -4 | -5 | 94.09  | 5.09  |
| 10 | -4 | -5 | 92.55  | 3.74  |
| 10 | -4 | -5 | 90.24  | 3.62  |
| 10 | -4 | -5 | 72.21  | 6.69  |
| 10 | -4 | -5 | 89.31  | 5.16  |
| 10 | -4 | -5 | 75.74  | 3.49  |
| 10 | -4 | -5 | 88.14  | 4.58  |
| 10 | -4 | -5 | 76.47  | 3.79  |
| 10 | -4 | -5 | 77.85  | 3.45  |
| 10 | -4 | -4 | 614.43 | 11.05 |
| 10 | -4 | -4 | 633.64 | 11.95 |
| 10 | -4 | -4 | 655.95 | 11.56 |
| 10 | -4 | -4 | 638.79 | 10.57 |
| 10 | -4 | -4 | 650.61 | 10.36 |
| 10 | -4 | -4 | 662.22 | 11.70 |
| 10 | -4 | -4 | 574.55 | 12.27 |
| 10 | -4 | -4 | 532.19 | 10.27 |
| 10 | -4 | -4 | 593.79 | 11.97 |
| 10 | -4 | -3 | 105.73 | 4.34  |
| 10 | -4 | -3 | 88.85  | 6.00  |
| 10 | -4 | -3 | 92.90  | 4.72  |
| 10 | -4 | -3 | 124.52 | 4.73  |
| 10 | -4 | -3 | 120.49 | 4.17  |



## CIF 31

|    |    |     |        |      |
|----|----|-----|--------|------|
| 10 | -4 | -3  | 116.70 | 3.94 |
| 10 | -4 | -3  | 124.33 | 4.81 |
| 10 | -4 | -3  | 102.37 | 5.32 |
| 10 | -4 | -3  | 98.35  | 3.92 |
| 10 | -4 | -2  | 149.23 | 5.02 |
| 10 | -4 | -2  | 150.13 | 6.55 |
| 10 | -4 | -2  | 166.65 | 5.39 |
| 10 | -4 | -2  | 163.98 | 4.73 |
| 10 | -4 | -2  | 157.56 | 4.45 |
| 10 | -4 | -2  | 169.72 | 5.56 |
| 10 | -4 | -2  | 143.87 | 4.65 |
| 10 | -4 | -1  | 9.14   | 1.42 |
| 10 | -4 | -1  | 12.51  | 2.25 |
| 10 | -4 | -1  | 11.25  | 1.36 |
| 10 | -4 | -1  | 12.56  | 1.68 |
| 10 | -4 | -1  | 8.88   | 1.22 |
| 10 | -4 | -1  | 10.43  | 1.75 |
| 10 | -4 | 0   | 174.86 | 5.12 |
| 10 | -4 | 0   | 234.12 | 7.77 |
| 10 | -4 | 0   | 203.38 | 4.86 |
| 10 | -4 | 0   | 207.46 | 5.76 |
| 10 | -4 | 0   | 164.94 | 5.76 |
| 10 | -4 | 1   | 49.68  | 2.72 |
| 10 | -4 | 1   | 44.32  | 2.90 |
| 10 | -4 | 2   | 265.66 | 5.84 |
| 10 | -4 | 2   | 233.49 | 6.31 |
| 10 | -4 | 3   | 81.69  | 3.23 |
| 10 | -3 | -12 | 17.00  | 1.37 |
| 10 | -3 | -12 | 20.18  | 1.58 |
| 10 | -3 | -12 | 15.76  | 1.18 |
| 10 | -3 | -11 | 68.98  | 2.97 |
| 10 | -3 | -11 | 70.03  | 2.80 |
| 10 | -3 | -10 | 2.77   | 1.13 |
| 10 | -3 | -10 | 4.01   | 1.04 |
| 10 | -3 | -10 | 3.03   | 0.93 |
| 10 | -3 | -10 | 4.07   | 0.95 |
| 10 | -3 | -10 | 3.76   | 0.93 |
| 10 | -3 | -9  | 7.48   | 1.25 |
| 10 | -3 | -9  | 8.73   | 1.22 |
| 10 | -3 | -9  | 7.92   | 1.56 |
| 10 | -3 | -9  | 7.59   | 1.36 |

## CIF 31

|    |    |    |       |      |
|----|----|----|-------|------|
| 10 | -3 | -9 | 7.58  | 1.30 |
| 10 | -3 | -9 | 8.67  | 1.28 |
| 10 | -3 | -9 | 9.01  | 1.33 |
| 10 | -3 | -8 | 21.64 | 1.97 |
| 10 | -3 | -8 | 23.13 | 2.00 |
| 10 | -3 | -8 | 27.63 | 2.26 |
| 10 | -3 | -8 | 22.41 | 1.97 |
| 10 | -3 | -8 | 24.11 | 1.98 |
| 10 | -3 | -8 | 21.77 | 1.94 |
| 10 | -3 | -8 | 26.05 | 2.23 |
| 10 | -3 | -7 | 51.70 | 2.97 |
| 10 | -3 | -7 | 52.05 | 3.98 |
| 10 | -3 | -7 | 53.85 | 3.36 |
| 10 | -3 | -7 | 55.15 | 3.21 |
| 10 | -3 | -7 | 49.33 | 3.69 |
| 10 | -3 | -7 | 59.26 | 3.05 |
| 10 | -3 | -7 | 57.26 | 3.57 |
| 10 | -3 | -7 | 60.84 | 3.35 |
| 10 | -3 | -7 | 45.68 | 2.78 |
| 10 | -3 | -7 | 53.84 | 3.21 |
| 10 | -3 | -6 | 36.40 | 2.56 |
| 10 | -3 | -6 | 43.44 | 4.95 |
| 10 | -3 | -6 | 41.70 | 2.94 |
| 10 | -3 | -6 | 40.18 | 2.77 |
| 10 | -3 | -6 | 39.38 | 2.50 |
| 10 | -3 | -6 | 41.26 | 2.78 |
| 10 | -3 | -6 | 42.95 | 4.83 |
| 10 | -3 | -6 | 43.24 | 3.26 |
| 10 | -3 | -6 | 38.06 | 2.47 |
| 10 | -3 | -6 | 39.64 | 2.92 |
| 10 | -3 | -6 | 37.60 | 2.80 |
| 10 | -3 | -5 | 3.24  | 1.02 |
| 10 | -3 | -5 | 5.98  | 4.95 |
| 10 | -3 | -5 | 3.35  | 1.49 |
| 10 | -3 | -5 | 2.93  | 1.16 |
| 10 | -3 | -5 | 3.45  | 1.22 |
| 10 | -3 | -5 | 4.66  | 5.66 |
| 10 | -3 | -5 | 5.06  | 2.80 |
| 10 | -3 | -5 | 3.57  | 1.00 |
| 10 | -3 | -5 | 1.92  | 2.08 |
| 10 | -3 | -5 | 2.34  | 1.64 |

## CIF 31

|    |    |     |        |      |
|----|----|-----|--------|------|
| 10 | -3 | -4  | 9.71   | 1.47 |
| 10 | -3 | -4  | 4.97   | 5.14 |
| 10 | -3 | -4  | 14.14  | 2.27 |
| 10 | -3 | -4  | 9.00   | 1.58 |
| 10 | -3 | -4  | 8.18   | 1.12 |
| 10 | -3 | -4  | 9.90   | 1.59 |
| 10 | -3 | -4  | 7.32   | 3.03 |
| 10 | -3 | -4  | 7.80   | 1.22 |
| 10 | -3 | -3  | 10.37  | 1.44 |
| 10 | -3 | -3  | 7.17   | 4.09 |
| 10 | -3 | -3  | 10.40  | 2.12 |
| 10 | -3 | -3  | 10.77  | 1.60 |
| 10 | -3 | -3  | 10.12  | 1.24 |
| 10 | -3 | -3  | 11.69  | 1.68 |
| 10 | -3 | -3  | 8.85   | 1.20 |
| 10 | -3 | -3  | 11.38  | 2.25 |
| 10 | -3 | -2  | 22.05  | 1.91 |
| 10 | -3 | -2  | 17.46  | 3.17 |
| 10 | -3 | -2  | 17.24  | 2.16 |
| 10 | -3 | -2  | 24.54  | 2.18 |
| 10 | -3 | -2  | 25.49  | 2.19 |
| 10 | -3 | -2  | 22.81  | 2.78 |
| 10 | -3 | -2  | 20.68  | 2.43 |
| 10 | -3 | -1  | 0.08   | 1.56 |
| 10 | -3 | -1  | 0.44   | 0.87 |
| 10 | -3 | -1  | 0.80   | 1.34 |
| 10 | -3 | -1  | -0.17  | 1.02 |
| 10 | -3 | 0   | 173.95 | 4.90 |
| 10 | -3 | 0   | 144.34 | 5.22 |
| 10 | -3 | 1   | 29.89  | 2.76 |
| 10 | -3 | 1   | 30.48  | 1.92 |
| 10 | -3 | 1   | 26.66  | 2.16 |
| 10 | -3 | 2   | 85.17  | 3.67 |
| 10 | -3 | 2   | 73.62  | 3.13 |
| 10 | -3 | 3   | 22.40  | 1.69 |
| 10 | -2 | -12 | 1.07   | 0.74 |
| 10 | -2 | -12 | 1.42   | 0.80 |
| 10 | -2 | -11 | 48.61  | 2.20 |
| 10 | -2 | -10 | 12.32  | 1.30 |
| 10 | -2 | -10 | 11.12  | 1.44 |
| 10 | -2 | -10 | 9.09   | 1.18 |

## CIF 31

|    |    |     |        |      |
|----|----|-----|--------|------|
| 10 | -2 | -10 | 8.28   | 1.15 |
| 10 | -2 | -10 | 10.17  | 1.38 |
| 10 | -2 | -9  | 7.22   | 1.30 |
| 10 | -2 | -9  | 5.64   | 1.34 |
| 10 | -2 | -9  | 6.54   | 1.35 |
| 10 | -2 | -9  | 4.28   | 1.01 |
| 10 | -2 | -9  | 4.96   | 1.01 |
| 10 | -2 | -9  | 5.46   | 1.23 |
| 10 | -2 | -8  | 292.52 | 7.10 |
| 10 | -2 | -8  | 356.25 | 7.74 |
| 10 | -2 | -8  | 365.05 | 8.28 |
| 10 | -2 | -8  | 323.15 | 6.88 |
| 10 | -2 | -8  | 298.25 | 6.55 |
| 10 | -2 | -8  | 379.75 | 7.93 |
| 10 | -2 | -8  | 288.87 | 6.73 |
| 10 | -2 | -8  | 322.82 | 7.84 |
| 10 | -2 | -7  | 19.08  | 1.84 |
| 10 | -2 | -7  | 17.49  | 2.35 |
| 10 | -2 | -7  | 25.05  | 3.59 |
| 10 | -2 | -7  | 18.77  | 2.07 |
| 10 | -2 | -7  | 17.75  | 3.77 |
| 10 | -2 | -7  | 15.70  | 1.52 |
| 10 | -2 | -7  | 23.32  | 2.69 |
| 10 | -2 | -7  | 16.61  | 1.63 |
| 10 | -2 | -7  | 19.10  | 2.06 |
| 10 | -2 | -7  | 17.03  | 1.86 |
| 10 | -2 | -6  | 158.92 | 5.03 |
| 10 | -2 | -6  | 168.82 | 6.71 |
| 10 | -2 | -6  | 149.86 | 7.83 |
| 10 | -2 | -6  | 167.32 | 5.53 |
| 10 | -2 | -6  | 190.47 | 5.91 |
| 10 | -2 | -6  | 201.68 | 7.52 |
| 10 | -2 | -6  | 194.62 | 6.24 |
| 10 | -2 | -6  | 160.19 | 5.56 |
| 10 | -2 | -6  | 139.97 | 4.41 |
| 10 | -2 | -6  | 155.29 | 5.38 |
| 10 | -2 | -5  | 43.77  | 2.61 |
| 10 | -2 | -5  | 41.93  | 5.54 |
| 10 | -2 | -5  | 40.15  | 2.80 |
| 10 | -2 | -5  | 56.71  | 3.25 |
| 10 | -2 | -5  | 52.44  | 3.36 |

## CIF 31

|    |    |     |        |       |
|----|----|-----|--------|-------|
| 10 | -2 | -5  | 51.02  | 2.96  |
| 10 | -2 | -5  | 42.27  | 5.56  |
| 10 | -2 | -5  | 55.37  | 3.84  |
| 10 | -2 | -5  | 45.47  | 3.16  |
| 10 | -2 | -5  | 45.74  | 3.34  |
| 10 | -2 | -4  | 502.64 | 9.36  |
| 10 | -2 | -4  | 496.12 | 13.46 |
| 10 | -2 | -4  | 587.68 | 10.67 |
| 10 | -2 | -4  | 606.81 | 11.09 |
| 10 | -2 | -4  | 616.96 | 10.67 |
| 10 | -2 | -4  | 470.60 | 12.44 |
| 10 | -2 | -4  | 595.19 | 11.37 |
| 10 | -2 | -4  | 569.24 | 11.20 |
| 10 | -2 | -3  | 1.59   | 4.14  |
| 10 | -2 | -3  | 2.21   | 1.21  |
| 10 | -2 | -3  | 2.60   | 1.15  |
| 10 | -2 | -3  | 2.19   | 1.89  |
| 10 | -2 | -3  | 2.56   | 1.06  |
| 10 | -2 | -3  | 2.68   | 2.55  |
| 10 | -2 | -3  | 1.42   | 1.68  |
| 10 | -2 | -2  | 397.14 | 7.81  |
| 10 | -2 | -2  | 404.86 | 9.32  |
| 10 | -2 | -2  | 382.49 | 8.69  |
| 10 | -2 | -1  | 7.55   | 2.68  |
| 10 | -2 | -1  | 9.19   | 1.39  |
| 10 | -2 | -1  | 11.43  | 1.32  |
| 10 | -2 | -1  | 11.94  | 1.93  |
| 10 | -2 | -1  | 10.07  | 1.68  |
| 10 | -2 | 0   | 29.10  | 3.12  |
| 10 | -2 | 0   | 31.29  | 1.98  |
| 10 | -2 | 0   | 33.51  | 2.32  |
| 10 | -2 | 1   | 174.37 | 5.18  |
| 10 | -2 | 2   | 102.75 | 3.77  |
| 10 | -2 | 3   | 5.34   | 1.33  |
| 10 | -1 | -12 | 6.52   | 1.02  |
| 10 | -1 | -12 | 7.69   | 1.18  |
| 10 | -1 | -11 | 101.73 | 3.62  |
| 10 | -1 | -11 | 99.68  | 3.96  |
| 10 | -1 | -10 | 0.87   | 0.82  |
| 10 | -1 | -10 | -0.33  | 0.92  |
| 10 | -1 | -10 | 0.05   | 1.07  |

## CIF 31

|    |    |     |        |      |
|----|----|-----|--------|------|
| 10 | -1 | -10 | 0.29   | 0.73 |
| 10 | -1 | -9  | 39.49  | 2.50 |
| 10 | -1 | -9  | 34.16  | 2.45 |
| 10 | -1 | -9  | 38.94  | 2.85 |
| 10 | -1 | -9  | 35.43  | 2.11 |
| 10 | -1 | -9  | 35.72  | 2.49 |
| 10 | -1 | -8  | 130.78 | 4.52 |
| 10 | -1 | -8  | 149.86 | 4.99 |
| 10 | -1 | -8  | 144.35 | 4.92 |
| 10 | -1 | -8  | 146.32 | 5.40 |
| 10 | -1 | -8  | 150.48 | 4.92 |
| 10 | -1 | -8  | 138.61 | 4.62 |
| 10 | -1 | -8  | 152.93 | 5.10 |
| 10 | -1 | -8  | 132.00 | 4.33 |
| 10 | -1 | -7  | 75.83  | 3.27 |
| 10 | -1 | -7  | 87.66  | 4.07 |
| 10 | -1 | -7  | 95.66  | 4.60 |
| 10 | -1 | -7  | 89.08  | 3.91 |
| 10 | -1 | -7  | 94.53  | 4.32 |
| 10 | -1 | -7  | 94.92  | 3.94 |
| 10 | -1 | -7  | 86.63  | 4.79 |
| 10 | -1 | -7  | 106.12 | 4.61 |
| 10 | -1 | -7  | 84.56  | 3.68 |
| 10 | -1 | -7  | 82.48  | 3.86 |
| 10 | -1 | -7  | 86.36  | 3.74 |
| 10 | -1 | -6  | 93.55  | 4.97 |
| 10 | -1 | -6  | 89.85  | 6.18 |
| 10 | -1 | -6  | 80.40  | 3.67 |
| 10 | -1 | -6  | 80.64  | 3.88 |
| 10 | -1 | -6  | 87.99  | 3.87 |
| 10 | -1 | -6  | 98.37  | 5.16 |
| 10 | -1 | -6  | 83.25  | 4.24 |
| 10 | -1 | -6  | 89.19  | 4.01 |
| 10 | -1 | -6  | 82.90  | 3.96 |
| 10 | -1 | -5  | 0.71   | 4.09 |
| 10 | -1 | -5  | 1.55   | 0.96 |
| 10 | -1 | -5  | 1.30   | 1.00 |
| 10 | -1 | -5  | 0.51   | 3.95 |
| 10 | -1 | -5  | 1.26   | 1.46 |
| 10 | -1 | -5  | 2.71   | 2.43 |
| 10 | -1 | -5  | 0.78   | 1.00 |

## CIF 31

|    |    |     |        |      |
|----|----|-----|--------|------|
| 10 | -1 | -5  | 1.08   | 1.58 |
| 10 | -1 | -4  | 19.73  | 4.92 |
| 10 | -1 | -4  | 20.59  | 1.87 |
| 10 | -1 | -4  | 23.12  | 2.11 |
| 10 | -1 | -4  | 26.73  | 2.72 |
| 10 | -1 | -4  | 20.70  | 2.08 |
| 10 | -1 | -4  | 20.41  | 2.51 |
| 10 | -1 | -3  | 110.94 | 3.90 |
| 10 | -1 | -3  | 124.15 | 4.36 |
| 10 | -1 | -3  | 119.17 | 4.52 |
| 10 | -1 | -3  | 120.57 | 4.96 |
| 10 | -1 | -2  | 118.59 | 6.62 |
| 10 | -1 | -2  | 150.66 | 4.57 |
| 10 | -1 | -2  | 118.33 | 6.11 |
| 10 | -1 | -2  | 156.16 | 5.30 |
| 10 | -1 | -2  | 134.03 | 4.61 |
| 10 | -1 | -1  | 5.70   | 2.95 |
| 10 | -1 | -1  | 7.59   | 1.20 |
| 10 | -1 | -1  | 4.36   | 3.02 |
| 10 | -1 | -1  | 9.35   | 1.66 |
| 10 | -1 | -1  | 7.11   | 1.23 |
| 10 | -1 | -1  | 5.79   | 1.47 |
| 10 | -1 | 0   | 61.67  | 2.92 |
| 10 | -1 | 0   | 57.93  | 3.12 |
| 10 | -1 | 1   | 177.65 | 5.53 |
| 10 | -1 | 1   | 217.97 | 5.53 |
| 10 | -1 | 2   | 31.36  | 2.10 |
| 10 | 0  | -12 | 57.16  | 2.23 |
| 10 | 0  | -11 | 2.15   | 0.82 |
| 10 | 0  | -11 | 2.38   | 1.02 |
| 10 | 0  | -10 | 44.06  | 2.33 |
| 10 | 0  | -10 | 44.48  | 2.40 |
| 10 | 0  | -10 | 43.74  | 2.72 |
| 10 | 0  | -9  | 85.90  | 3.53 |
| 10 | 0  | -9  | 77.76  | 3.29 |
| 10 | 0  | -9  | 77.85  | 3.78 |
| 10 | 0  | -9  | 87.41  | 3.42 |
| 10 | 0  | -9  | 78.69  | 3.21 |
| 10 | 0  | -9  | 77.37  | 3.43 |
| 10 | 0  | -8  | 120.48 | 4.36 |
| 10 | 0  | -8  | 101.10 | 3.87 |

## CIF 31

|    |   |    |        |      |
|----|---|----|--------|------|
| 10 | 0 | -8 | 108.90 | 4.42 |
| 10 | 0 | -8 | 113.02 | 4.06 |
| 10 | 0 | -8 | 115.69 | 4.21 |
| 10 | 0 | -8 | 116.53 | 4.32 |
| 10 | 0 | -8 | 103.25 | 3.84 |
| 10 | 0 | -7 | 8.90   | 1.47 |
| 10 | 0 | -7 | 9.88   | 1.86 |
| 10 | 0 | -7 | 8.23   | 1.28 |
| 10 | 0 | -7 | 8.52   | 1.46 |
| 10 | 0 | -7 | 9.39   | 1.45 |
| 10 | 0 | -7 | 7.65   | 2.42 |
| 10 | 0 | -7 | 11.24  | 1.84 |
| 10 | 0 | -7 | 6.83   | 1.42 |
| 10 | 0 | -7 | 7.70   | 1.30 |
| 10 | 0 | -7 | 9.07   | 1.37 |
| 10 | 0 | -6 | 118.45 | 4.80 |
| 10 | 0 | -6 | 97.30  | 3.65 |
| 10 | 0 | -6 | 85.48  | 3.72 |
| 10 | 0 | -6 | 123.73 | 4.20 |
| 10 | 0 | -6 | 103.45 | 6.23 |
| 10 | 0 | -6 | 137.65 | 5.32 |
| 10 | 0 | -6 | 110.46 | 4.51 |
| 10 | 0 | -6 | 105.44 | 4.18 |
| 10 | 0 | -6 | 113.07 | 4.41 |
| 10 | 0 | -5 | 133.91 | 5.60 |
| 10 | 0 | -5 | 125.16 | 6.34 |
| 10 | 0 | -5 | 125.79 | 4.20 |
| 10 | 0 | -5 | 121.65 | 5.06 |
| 10 | 0 | -5 | 116.78 | 4.30 |
| 10 | 0 | -5 | 119.78 | 4.76 |
| 10 | 0 | -4 | 16.83  | 5.18 |
| 10 | 0 | -4 | 16.05  | 1.55 |
| 10 | 0 | -4 | 22.05  | 3.72 |
| 10 | 0 | -4 | 18.61  | 1.92 |
| 10 | 0 | -4 | 12.13  | 2.82 |
| 10 | 0 | -4 | 15.77  | 1.66 |
| 10 | 0 | -4 | 18.98  | 2.35 |
| 10 | 0 | -3 | 4.38   | 3.33 |
| 10 | 0 | -3 | 4.38   | 0.94 |
| 10 | 0 | -3 | 3.88   | 3.22 |
| 10 | 0 | -3 | 3.80   | 1.16 |



## CIF 31

|    |   |     |        |      |
|----|---|-----|--------|------|
| 10 | 0 | -3  | 4.75   | 2.40 |
| 10 | 0 | -3  | 3.72   | 0.95 |
| 10 | 0 | -2  | 69.29  | 4.74 |
| 10 | 0 | -2  | 70.25  | 4.44 |
| 10 | 0 | -2  | 68.23  | 3.08 |
| 10 | 0 | -2  | 66.68  | 3.50 |
| 10 | 0 | -1  | 206.22 | 6.21 |
| 10 | 0 | -1  | 195.68 | 4.83 |
| 10 | 0 | -1  | 201.76 | 5.67 |
| 10 | 0 | 0   | 8.76   | 1.89 |
| 10 | 0 | 0   | 7.75   | 1.77 |
| 10 | 0 | 0   | 7.92   | 1.31 |
| 10 | 0 | 1   | 51.78  | 2.47 |
| 10 | 0 | 1   | 66.66  | 3.08 |
| 10 | 1 | -11 | 19.91  | 1.28 |
| 10 | 1 | -11 | 25.44  | 1.82 |
| 10 | 1 | -10 | 5.46   | 0.88 |
| 10 | 1 | -10 | 7.09   | 1.26 |
| 10 | 1 | -10 | 7.74   | 1.03 |
| 10 | 1 | -9  | 0.54   | 0.91 |
| 10 | 1 | -9  | 0.28   | 0.62 |
| 10 | 1 | -9  | 0.17   | 0.91 |
| 10 | 1 | -9  | 0.72   | 0.83 |
| 10 | 1 | -9  | 1.19   | 0.75 |
| 10 | 1 | -8  | 44.74  | 2.14 |
| 10 | 1 | -8  | 48.04  | 2.76 |
| 10 | 1 | -8  | 61.22  | 2.67 |
| 10 | 1 | -8  | 60.59  | 3.01 |
| 10 | 1 | -8  | 52.22  | 2.69 |
| 10 | 1 | -8  | 58.18  | 2.80 |
| 10 | 1 | -7  | 14.71  | 1.59 |
| 10 | 1 | -7  | 18.47  | 1.54 |
| 10 | 1 | -7  | 19.01  | 2.07 |
| 10 | 1 | -7  | 19.65  | 1.79 |
| 10 | 1 | -7  | 18.02  | 1.68 |
| 10 | 1 | -7  | 18.45  | 1.76 |
| 10 | 1 | -6  | 70.26  | 3.41 |
| 10 | 1 | -6  | 60.43  | 2.58 |
| 10 | 1 | -6  | 67.87  | 4.16 |
| 10 | 1 | -6  | 66.63  | 3.08 |
| 10 | 1 | -6  | 71.24  | 3.44 |

## CIF 31

|    |   |     |        |      |
|----|---|-----|--------|------|
| 10 | 1 | -6  | 55.47  | 2.77 |
| 10 | 1 | -6  | 66.57  | 3.22 |
| 10 | 1 | -5  | 324.75 | 6.04 |
| 10 | 1 | -5  | 333.47 | 8.58 |
| 10 | 1 | -5  | 344.25 | 7.91 |
| 10 | 1 | -5  | 325.86 | 7.56 |
| 10 | 1 | -4  | 5.43   | 2.05 |
| 10 | 1 | -4  | 5.62   | 1.45 |
| 10 | 1 | -4  | 3.90   | 1.99 |
| 10 | 1 | -3  | 251.62 | 6.90 |
| 10 | 1 | -3  | 263.07 | 6.46 |
| 10 | 1 | -2  | 100.81 | 3.75 |
| 10 | 1 | -2  | 93.48  | 4.14 |
| 10 | 1 | -2  | 93.43  | 3.61 |
| 10 | 1 | -1  | 45.44  | 2.14 |
| 10 | 1 | -1  | 48.61  | 2.24 |
| 10 | 1 | -1  | 44.05  | 2.71 |
| 10 | 1 | 0   | 6.87   | 2.39 |
| 10 | 2 | -11 | 0.38   | 0.50 |
| 10 | 2 | -10 | 78.02  | 2.56 |
| 10 | 2 | -9  | 66.03  | 2.69 |
| 10 | 2 | -8  | 5.23   | 1.10 |
| 10 | 2 | -8  | 6.56   | 1.21 |
| 10 | 2 | -7  | 1.55   | 0.89 |
| 10 | 2 | -7  | 0.57   | 0.69 |
| 10 | 2 | -7  | 0.38   | 0.85 |
| 10 | 2 | -7  | 1.07   | 0.73 |
| 10 | 2 | -7  | 2.03   | 0.84 |
| 10 | 2 | -6  | 2.55   | 0.97 |
| 10 | 2 | -6  | 2.32   | 0.86 |
| 10 | 2 | -6  | 2.29   | 0.91 |
| 10 | 2 | -6  | 2.38   | 0.86 |
| 10 | 2 | -5  | 14.88  | 1.48 |
| 10 | 2 | -5  | 16.16  | 1.89 |
| 10 | 2 | -5  | 12.08  | 1.47 |
| 10 | 2 | -5  | 16.63  | 1.59 |
| 10 | 2 | -5  | 11.62  | 1.41 |
| 10 | 2 | -4  | 70.26  | 2.71 |
| 10 | 2 | -4  | 70.05  | 3.29 |
| 10 | 2 | -4  | 72.39  | 3.22 |
| 10 | 2 | -4  | 71.86  | 3.12 |

## CIF 31

|    |    |    |        |      |
|----|----|----|--------|------|
| 10 | 2  | -4 | 65.66  | 2.91 |
| 10 | 2  | -3 | 164.50 | 3.81 |
| 10 | 2  | -3 | 178.63 | 4.86 |
| 10 | 2  | -3 | 169.89 | 4.79 |
| 10 | 2  | -2 | 40.92  | 2.21 |
| 10 | 2  | -1 | 118.42 | 2.96 |
| 10 | 3  | -9 | 54.71  | 2.11 |
| 10 | 3  | -8 | 1.07   | 0.69 |
| 10 | 3  | -7 | 64.14  | 2.16 |
| 10 | 3  | -6 | 0.47   | 0.55 |
| 10 | 3  | -6 | 0.32   | 0.60 |
| 10 | 3  | -6 | 1.61   | 0.82 |
| 10 | 3  | -5 | 5.62   | 0.92 |
| 10 | 3  | -5 | 4.29   | 0.90 |
| 10 | 3  | -5 | 5.67   | 0.97 |
| 10 | 3  | -4 | 1.03   | 0.86 |
| 10 | 3  | -4 | 0.60   | 0.65 |
| 10 | 3  | -4 | 0.19   | 0.58 |
| 10 | 3  | -3 | 10.32  | 0.90 |
| 10 | 3  | -2 | 11.37  | 1.09 |
| 10 | 3  | -2 | 10.05  | 0.92 |
| 11 | -9 | -5 | 106.41 | 2.91 |
| 11 | -9 | -5 | 110.16 | 2.59 |
| 11 | -9 | -4 | 156.78 | 3.31 |
| 11 | -9 | -4 | 217.69 | 3.93 |
| 11 | -9 | -3 | 49.12  | 1.98 |
| 11 | -9 | -3 | 63.38  | 2.11 |
| 11 | -9 | -2 | 64.59  | 2.44 |
| 11 | -9 | -2 | 61.18  | 2.03 |
| 11 | -9 | -2 | 68.41  | 2.18 |
| 11 | -9 | -1 | 6.25   | 1.26 |
| 11 | -9 | -1 | 7.02   | 1.35 |
| 11 | -9 | -1 | 9.75   | 1.01 |
| 11 | -9 | -1 | 6.77   | 0.95 |
| 11 | -9 | -1 | 6.92   | 0.76 |
| 11 | -9 | 0  | 7.73   | 1.53 |
| 11 | -9 | 0  | 11.38  | 1.07 |
| 11 | -9 | 0  | 12.08  | 1.02 |
| 11 | -9 | 0  | 6.33   | 0.65 |
| 11 | -9 | 1  | 60.38  | 1.60 |
| 11 | -9 | 1  | 64.72  | 2.10 |

## CIF 31

|    |    |    |        |      |
|----|----|----|--------|------|
| 11 | -9 | 1  | 65.69  | 2.01 |
| 11 | -8 | -7 | 1.62   | 0.62 |
| 11 | -8 | -7 | 1.02   | 0.45 |
| 11 | -8 | -6 | 30.22  | 1.51 |
| 11 | -8 | -6 | 27.03  | 1.39 |
| 11 | -8 | -6 | 31.69  | 1.53 |
| 11 | -8 | -5 | 32.53  | 1.61 |
| 11 | -8 | -5 | 31.87  | 1.54 |
| 11 | -8 | -4 | 40.18  | 2.13 |
| 11 | -8 | -4 | 44.57  | 1.96 |
| 11 | -8 | -4 | 43.92  | 2.09 |
| 11 | -8 | -4 | 41.88  | 1.88 |
| 11 | -8 | -3 | 115.89 | 3.74 |
| 11 | -8 | -3 | 133.00 | 3.78 |
| 11 | -8 | -3 | 135.96 | 3.83 |
| 11 | -8 | -3 | 131.83 | 3.68 |
| 11 | -8 | -3 | 126.93 | 3.70 |
| 11 | -8 | -3 | 115.67 | 3.12 |
| 11 | -8 | -2 | 23.59  | 2.29 |
| 11 | -8 | -2 | 28.87  | 1.81 |
| 11 | -8 | -2 | 26.48  | 1.70 |
| 11 | -8 | -2 | 25.85  | 1.84 |
| 11 | -8 | -2 | 20.56  | 1.31 |
| 11 | -8 | -1 | 25.66  | 2.57 |
| 11 | -8 | -1 | 36.87  | 2.01 |
| 11 | -8 | -1 | 35.24  | 1.86 |
| 11 | -8 | -1 | 36.66  | 2.19 |
| 11 | -8 | -1 | 28.61  | 2.44 |
| 11 | -8 | -1 | 31.57  | 1.48 |
| 11 | -8 | 0  | 12.20  | 1.27 |
| 11 | -8 | 0  | 12.73  | 1.14 |
| 11 | -8 | 0  | 11.59  | 1.43 |
| 11 | -8 | 0  | 10.38  | 1.96 |
| 11 | -8 | 1  | 0.99   | 0.73 |
| 11 | -8 | 1  | 0.45   | 0.47 |
| 11 | -8 | 2  | 24.09  | 1.29 |
| 11 | -7 | -8 | 225.80 | 4.07 |
| 11 | -7 | -7 | 296.47 | 5.63 |
| 11 | -7 | -7 | 294.61 | 5.94 |
| 11 | -7 | -7 | 302.05 | 5.45 |
| 11 | -7 | -6 | 303.57 | 6.17 |

## CIF 31

|    |    |    |        |      |
|----|----|----|--------|------|
| 11 | -7 | -6 | 320.21 | 5.62 |
| 11 | -7 | -6 | 320.59 | 6.38 |
| 11 | -7 | -6 | 281.71 | 5.04 |
| 11 | -7 | -6 | 286.95 | 5.48 |
| 11 | -7 | -5 | 78.36  | 3.18 |
| 11 | -7 | -5 | 85.96  | 3.07 |
| 11 | -7 | -5 | 87.91  | 3.17 |
| 11 | -7 | -5 | 72.58  | 2.95 |
| 11 | -7 | -5 | 77.11  | 2.53 |
| 11 | -7 | -5 | 75.61  | 2.63 |
| 11 | -7 | -4 | 2.12   | 1.16 |
| 11 | -7 | -4 | 1.95   | 1.39 |
| 11 | -7 | -4 | 1.25   | 0.89 |
| 11 | -7 | -4 | 1.68   | 0.85 |
| 11 | -7 | -4 | 0.81   | 0.80 |
| 11 | -7 | -4 | 0.58   | 1.15 |
| 11 | -7 | -4 | 1.33   | 0.67 |
| 11 | -7 | -4 | 1.39   | 1.07 |
| 11 | -7 | -4 | 2.13   | 0.67 |
| 11 | -7 | -3 | 13.11  | 2.10 |
| 11 | -7 | -3 | 15.20  | 2.67 |
| 11 | -7 | -3 | 17.76  | 1.59 |
| 11 | -7 | -3 | 19.72  | 1.55 |
| 11 | -7 | -3 | 17.37  | 1.68 |
| 11 | -7 | -3 | 14.83  | 2.41 |
| 11 | -7 | -3 | 12.93  | 1.36 |
| 11 | -7 | -3 | 13.37  | 2.02 |
| 11 | -7 | -3 | 12.75  | 1.11 |
| 11 | -7 | -2 | 1.98   | 2.17 |
| 11 | -7 | -2 | 3.90   | 0.97 |
| 11 | -7 | -2 | 4.22   | 0.94 |
| 11 | -7 | -2 | 4.10   | 1.31 |
| 11 | -7 | -2 | 2.97   | 2.27 |
| 11 | -7 | -2 | 3.10   | 0.81 |
| 11 | -7 | -2 | 2.88   | 1.91 |
| 11 | -7 | -1 | 1.77   | 2.49 |
| 11 | -7 | -1 | 7.24   | 1.16 |
| 11 | -7 | -1 | 6.11   | 0.99 |
| 11 | -7 | -1 | 6.19   | 2.41 |
| 11 | -7 | -1 | 3.96   | 0.87 |
| 11 | -7 | -1 | 5.25   | 1.98 |

## CIF 31

|    |    |    |        |      |
|----|----|----|--------|------|
| 11 | -7 | 0  | 12.47  | 1.33 |
| 11 | -7 | 0  | 13.11  | 1.15 |
| 11 | -7 | 0  | 11.87  | 1.63 |
| 11 | -7 | 0  | 8.17   | 1.98 |
| 11 | -7 | 1  | 16.34  | 1.27 |
| 11 | -7 | 1  | 13.85  | 1.01 |
| 11 | -7 | 1  | 15.53  | 1.56 |
| 11 | -7 | 2  | 150.36 | 3.12 |
| 11 | -7 | 2  | 172.10 | 3.96 |
| 11 | -6 | -9 | 81.26  | 2.53 |
| 11 | -6 | -9 | 92.24  | 2.84 |
| 11 | -6 | -8 | 154.85 | 4.12 |
| 11 | -6 | -8 | 159.15 | 4.13 |
| 11 | -6 | -7 | 38.89  | 2.27 |
| 11 | -6 | -7 | 42.39  | 2.12 |
| 11 | -6 | -7 | 39.95  | 2.22 |
| 11 | -6 | -6 | 28.65  | 2.10 |
| 11 | -6 | -6 | 25.93  | 1.83 |
| 11 | -6 | -6 | 24.64  | 1.90 |
| 11 | -6 | -6 | 21.80  | 1.72 |
| 11 | -6 | -5 | 319.68 | 7.23 |
| 11 | -6 | -5 | 360.30 | 7.16 |
| 11 | -6 | -5 | 351.26 | 7.15 |
| 11 | -6 | -5 | 337.66 | 6.74 |
| 11 | -6 | -5 | 300.38 | 6.52 |
| 11 | -6 | -5 | 304.11 | 6.75 |
| 11 | -6 | -4 | 8.79   | 1.70 |
| 11 | -6 | -4 | 10.01  | 2.30 |
| 11 | -6 | -4 | 9.57   | 1.31 |
| 11 | -6 | -4 | 9.01   | 1.21 |
| 11 | -6 | -4 | 8.25   | 1.33 |
| 11 | -6 | -4 | 8.09   | 3.35 |
| 11 | -6 | -4 | 10.26  | 2.20 |
| 11 | -6 | -4 | 7.97   | 1.15 |
| 11 | -6 | -4 | 8.61   | 1.77 |
| 11 | -6 | -3 | 293.99 | 6.08 |
| 11 | -6 | -3 | 294.31 | 5.90 |
| 11 | -6 | -3 | 285.74 | 7.23 |
| 11 | -6 | -3 | 256.14 | 5.92 |
| 11 | -6 | -3 | 263.92 | 6.81 |
| 11 | -6 | -2 | 1.74   | 0.83 |

## CIF 31

|    |    |     |        |      |
|----|----|-----|--------|------|
| 11 | -6 | -2  | 0.83   | 0.68 |
| 11 | -6 | -2  | 1.65   | 1.29 |
| 11 | -6 | -2  | 2.01   | 2.61 |
| 11 | -6 | -2  | 0.95   | 0.62 |
| 11 | -6 | -2  | 0.84   | 2.09 |
| 11 | -6 | -1  | 133.21 | 4.88 |
| 11 | -6 | -1  | 181.08 | 4.36 |
| 11 | -6 | -1  | 161.59 | 3.90 |
| 11 | -6 | -1  | 173.86 | 4.90 |
| 11 | -6 | -1  | 159.56 | 5.57 |
| 11 | -6 | -1  | 138.35 | 3.94 |
| 11 | -6 | -1  | 141.38 | 5.02 |
| 11 | -6 | 0   | 93.74  | 2.91 |
| 11 | -6 | 0   | 85.23  | 2.53 |
| 11 | -6 | 0   | 99.32  | 3.54 |
| 11 | -6 | 0   | 93.36  | 4.18 |
| 11 | -6 | 1   | 9.36   | 0.92 |
| 11 | -6 | 1   | 10.99  | 1.36 |
| 11 | -6 | 2   | 70.74  | 2.45 |
| 11 | -6 | 3   | 18.23  | 1.38 |
| 11 | -5 | -10 | 6.36   | 0.83 |
| 11 | -5 | -10 | 6.76   | 0.80 |
| 11 | -5 | -9  | 102.22 | 3.26 |
| 11 | -5 | -9  | 102.41 | 2.86 |
| 11 | -5 | -9  | 97.24  | 3.09 |
| 11 | -5 | -8  | 369.57 | 7.19 |
| 11 | -5 | -8  | 376.97 | 6.76 |
| 11 | -5 | -8  | 367.25 | 6.74 |
| 11 | -5 | -7  | 122.90 | 4.23 |
| 11 | -5 | -7  | 128.27 | 3.97 |
| 11 | -5 | -7  | 124.24 | 3.86 |
| 11 | -5 | -7  | 113.86 | 3.79 |
| 11 | -5 | -6  | 22.13  | 2.01 |
| 11 | -5 | -6  | 22.65  | 2.01 |
| 11 | -5 | -6  | 24.19  | 1.93 |
| 11 | -5 | -6  | 19.98  | 1.70 |
| 11 | -5 | -6  | 22.07  | 1.86 |
| 11 | -5 | -6  | 22.55  | 1.78 |
| 11 | -5 | -6  | 21.99  | 1.87 |
| 11 | -5 | -5  | 100.69 | 5.39 |
| 11 | -5 | -5  | 131.18 | 4.46 |

## CIF 31

|    |    |     |        |      |
|----|----|-----|--------|------|
| 11 | -5 | -5  | 131.58 | 5.02 |
| 11 | -5 | -5  | 134.57 | 4.62 |
| 11 | -5 | -5  | 110.63 | 3.78 |
| 11 | -5 | -5  | 126.09 | 4.44 |
| 11 | -5 | -4  | 23.88  | 2.26 |
| 11 | -5 | -4  | 28.03  | 3.03 |
| 11 | -5 | -4  | 23.83  | 2.03 |
| 11 | -5 | -4  | 21.28  | 4.58 |
| 11 | -5 | -4  | 25.09  | 2.82 |
| 11 | -5 | -4  | 21.04  | 1.66 |
| 11 | -5 | -4  | 22.49  | 2.43 |
| 11 | -5 | -4  | 22.92  | 2.03 |
| 11 | -5 | -3  | 122.51 | 4.63 |
| 11 | -5 | -3  | 116.77 | 3.55 |
| 11 | -5 | -3  | 109.63 | 3.29 |
| 11 | -5 | -3  | 123.54 | 4.27 |
| 11 | -5 | -3  | 111.14 | 5.05 |
| 11 | -5 | -3  | 97.73  | 3.43 |
| 11 | -5 | -3  | 111.89 | 4.68 |
| 11 | -5 | -2  | 26.75  | 2.78 |
| 11 | -5 | -2  | 24.72  | 1.60 |
| 11 | -5 | -2  | 22.32  | 1.43 |
| 11 | -5 | -2  | 26.41  | 2.05 |
| 11 | -5 | -2  | 24.90  | 3.26 |
| 11 | -5 | -1  | 7.14   | 2.07 |
| 11 | -5 | -1  | 4.91   | 0.80 |
| 11 | -5 | -1  | 4.60   | 1.24 |
| 11 | -5 | -1  | 5.99   | 2.43 |
| 11 | -5 | -1  | 4.38   | 1.90 |
| 11 | -5 | 0   | 1.41   | 1.61 |
| 11 | -5 | 0   | 1.26   | 0.93 |
| 11 | -5 | 0   | 0.04   | 1.45 |
| 11 | -5 | 1   | 23.58  | 1.57 |
| 11 | -5 | 1   | 25.55  | 2.37 |
| 11 | -5 | 2   | 6.99   | 1.19 |
| 11 | -4 | -10 | 8.41   | 1.06 |
| 11 | -4 | -10 | 5.92   | 0.77 |
| 11 | -4 | -9  | 59.20  | 2.68 |
| 11 | -4 | -9  | 61.38  | 2.39 |
| 11 | -4 | -8  | 304.61 | 6.21 |
| 11 | -4 | -8  | 256.49 | 5.43 |



## CIF 31

|    |    |    |        |      |
|----|----|----|--------|------|
| 11 | -4 | -7 | 14.26  | 1.42 |
| 11 | -4 | -7 | 11.46  | 1.47 |
| 11 | -4 | -7 | 14.19  | 1.37 |
| 11 | -4 | -7 | 11.81  | 1.26 |
| 11 | -4 | -7 | 15.22  | 1.57 |
| 11 | -4 | -6 | 4.36   | 2.53 |
| 11 | -4 | -6 | 6.34   | 1.39 |
| 11 | -4 | -6 | 3.60   | 1.11 |
| 11 | -4 | -6 | 4.20   | 0.96 |
| 11 | -4 | -6 | 4.18   | 1.74 |
| 11 | -4 | -6 | 4.43   | 1.19 |
| 11 | -4 | -6 | 3.84   | 0.87 |
| 11 | -4 | -6 | 4.31   | 1.12 |
| 11 | -4 | -5 | 4.33   | 1.17 |
| 11 | -4 | -5 | 3.85   | 0.88 |
| 11 | -4 | -5 | 2.86   | 0.94 |
| 11 | -4 | -5 | 6.91   | 3.39 |
| 11 | -4 | -5 | 2.60   | 1.58 |
| 11 | -4 | -5 | 2.26   | 0.75 |
| 11 | -4 | -5 | 3.94   | 1.25 |
| 11 | -4 | -5 | 2.22   | 1.27 |
| 11 | -4 | -4 | 43.83  | 2.74 |
| 11 | -4 | -4 | 59.67  | 2.92 |
| 11 | -4 | -4 | 47.11  | 5.30 |
| 11 | -4 | -4 | 60.86  | 3.77 |
| 11 | -4 | -4 | 48.77  | 2.94 |
| 11 | -4 | -3 | 1.10   | 1.19 |
| 11 | -4 | -3 | 0.04   | 2.32 |
| 11 | -4 | -3 | 1.02   | 0.87 |
| 11 | -4 | -3 | 2.33   | 4.64 |
| 11 | -4 | -3 | -0.05  | 2.42 |
| 11 | -4 | -3 | 1.85   | 1.82 |
| 11 | -4 | -3 | 0.31   | 1.16 |
| 11 | -4 | -2 | 142.01 | 4.63 |
| 11 | -4 | -2 | 145.50 | 5.08 |
| 11 | -4 | -1 | 58.62  | 2.94 |
| 11 | -4 | -1 | 63.79  | 2.74 |
| 11 | -4 | -1 | 57.16  | 3.64 |
| 11 | -4 | -1 | 55.16  | 3.21 |
| 11 | -4 | 0  | 0.48   | 1.09 |
| 11 | -4 | 0  | 0.90   | 0.65 |

## CIF 31

|    |    |     |        |       |
|----|----|-----|--------|-------|
| 11 | -4 | 0   | 2.95   | 1.88  |
| 11 | -4 | 0   | 0.66   | 1.32  |
| 11 | -4 | 1   | 0.07   | 0.65  |
| 11 | -4 | 1   | -0.31  | 1.41  |
| 11 | -4 | 2   | 73.53  | 2.24  |
| 11 | -3 | -10 | 41.27  | 2.19  |
| 11 | -3 | -10 | 43.06  | 1.94  |
| 11 | -3 | -9  | 4.14   | 1.04  |
| 11 | -3 | -9  | 4.66   | 1.08  |
| 11 | -3 | -9  | 5.08   | 0.97  |
| 11 | -3 | -8  | 9.42   | 1.20  |
| 11 | -3 | -8  | 10.35  | 1.42  |
| 11 | -3 | -8  | 10.39  | 1.33  |
| 11 | -3 | -8  | 7.81   | 1.16  |
| 11 | -3 | -7  | 970.01 | 12.97 |
| 11 | -3 | -7  | 885.68 | 13.09 |
| 11 | -3 | -7  | 903.22 | 13.07 |
| 11 | -3 | -7  | 977.69 | 13.00 |
| 11 | -3 | -7  | 890.04 | 13.14 |
| 11 | -3 | -6  | 556.08 | 9.89  |
| 11 | -3 | -6  | 528.06 | 9.48  |
| 11 | -3 | -6  | 488.35 | 8.59  |
| 11 | -3 | -6  | 482.58 | 9.06  |
| 11 | -3 | -6  | 483.43 | 9.02  |
| 11 | -3 | -6  | 614.36 | 10.21 |
| 11 | -3 | -6  | 583.36 | 9.94  |
| 11 | -3 | -6  | 485.09 | 8.55  |
| 11 | -3 | -5  | 78.79  | 5.74  |
| 11 | -3 | -5  | 94.41  | 3.74  |
| 11 | -3 | -5  | 109.59 | 4.02  |
| 11 | -3 | -5  | 114.04 | 5.41  |
| 11 | -3 | -5  | 112.62 | 4.37  |
| 11 | -3 | -5  | 87.36  | 3.78  |
| 11 | -3 | -5  | 83.09  | 3.69  |
| 11 | -3 | -5  | 93.28  | 3.89  |
| 11 | -3 | -4  | 38.36  | 2.41  |
| 11 | -3 | -4  | 40.84  | 2.62  |
| 11 | -3 | -4  | 40.62  | 2.33  |
| 11 | -3 | -4  | 37.67  | 4.79  |
| 11 | -3 | -4  | 41.00  | 2.63  |
| 11 | -3 | -4  | 37.83  | 2.70  |

## CIF 31

|    |    |     |        |      |
|----|----|-----|--------|------|
| 11 | -3 | -3  | 99.11  | 3.66 |
| 11 | -3 | -3  | 111.58 | 4.11 |
| 11 | -3 | -3  | 104.20 | 3.61 |
| 11 | -3 | -3  | 109.37 | 4.52 |
| 11 | -3 | -3  | 106.32 | 4.13 |
| 11 | -3 | -3  | 103.68 | 4.18 |
| 11 | -3 | -2  | 113.29 | 3.76 |
| 11 | -3 | -2  | 136.71 | 4.38 |
| 11 | -3 | -2  | 128.04 | 3.77 |
| 11 | -3 | -2  | 141.77 | 5.08 |
| 11 | -3 | -2  | 120.68 | 4.31 |
| 11 | -3 | -2  | 127.68 | 4.56 |
| 11 | -3 | -1  | 18.01  | 1.46 |
| 11 | -3 | -1  | 22.51  | 2.02 |
| 11 | -3 | -1  | 22.87  | 2.46 |
| 11 | -3 | -1  | 21.18  | 1.91 |
| 11 | -3 | 0   | 79.19  | 2.82 |
| 11 | -3 | 0   | 84.76  | 3.46 |
| 11 | -3 | 0   | 76.35  | 3.23 |
| 11 | -3 | 1   | 1.62   | 2.49 |
| 11 | -2 | -10 | 6.27   | 0.98 |
| 11 | -2 | -10 | 6.42   | 1.03 |
| 11 | -2 | -9  | 76.98  | 2.64 |
| 11 | -2 | -9  | 73.75  | 2.91 |
| 11 | -2 | -9  | 73.65  | 3.06 |
| 11 | -2 | -8  | 6.07   | 1.14 |
| 11 | -2 | -8  | 8.49   | 1.28 |
| 11 | -2 | -8  | 8.85   | 1.33 |
| 11 | -2 | -8  | 7.10   | 1.23 |
| 11 | -2 | -8  | 7.74   | 1.20 |
| 11 | -2 | -7  | 138.11 | 4.31 |
| 11 | -2 | -7  | 120.19 | 4.02 |
| 11 | -2 | -7  | 109.08 | 3.71 |
| 11 | -2 | -7  | 145.06 | 4.35 |
| 11 | -2 | -7  | 123.19 | 3.86 |
| 11 | -2 | -7  | 151.35 | 4.54 |
| 11 | -2 | -6  | 39.36  | 3.23 |
| 11 | -2 | -6  | 40.25  | 2.35 |
| 11 | -2 | -6  | 38.11  | 2.29 |
| 11 | -2 | -6  | 38.80  | 3.59 |
| 11 | -2 | -6  | 38.92  | 2.76 |

## CIF 31

|    |    |     |        |      |
|----|----|-----|--------|------|
| 11 | -2 | -6  | 35.48  | 2.31 |
| 11 | -2 | -6  | 36.90  | 2.28 |
| 11 | -2 | -5  | 10.24  | 1.33 |
| 11 | -2 | -5  | 12.85  | 4.36 |
| 11 | -2 | -5  | 15.90  | 1.60 |
| 11 | -2 | -5  | 15.52  | 2.75 |
| 11 | -2 | -5  | 10.80  | 2.15 |
| 11 | -2 | -5  | 13.85  | 1.55 |
| 11 | -2 | -5  | 14.32  | 1.77 |
| 11 | -2 | -4  | 129.01 | 3.99 |
| 11 | -2 | -4  | 166.02 | 4.59 |
| 11 | -2 | -4  | 178.93 | 6.34 |
| 11 | -2 | -4  | 184.54 | 5.27 |
| 11 | -2 | -4  | 130.17 | 4.89 |
| 11 | -2 | -4  | 144.93 | 4.54 |
| 11 | -2 | -4  | 146.68 | 4.86 |
| 11 | -2 | -3  | 19.26  | 1.53 |
| 11 | -2 | -3  | 25.24  | 1.81 |
| 11 | -2 | -3  | 28.49  | 2.29 |
| 11 | -2 | -3  | 21.46  | 1.78 |
| 11 | -2 | -3  | 24.87  | 2.21 |
| 11 | -2 | -2  | 162.31 | 4.16 |
| 11 | -2 | -2  | 180.96 | 5.02 |
| 11 | -2 | -1  | 19.63  | 1.31 |
| 11 | -2 | -1  | 21.15  | 3.50 |
| 11 | -2 | -1  | 23.03  | 1.81 |
| 11 | -2 | -1  | 20.50  | 1.86 |
| 11 | -2 | 0   | 476.73 | 8.49 |
| 11 | -1 | -10 | 229.36 | 4.49 |
| 11 | -1 | -10 | 241.57 | 4.89 |
| 11 | -1 | -9  | 18.52  | 1.45 |
| 11 | -1 | -9  | 9.10   | 1.06 |
| 11 | -1 | -9  | 10.25  | 1.17 |
| 11 | -1 | -9  | 18.17  | 1.41 |
| 11 | -1 | -8  | 680.69 | 9.55 |
| 11 | -1 | -8  | 522.35 | 8.35 |
| 11 | -1 | -8  | 470.12 | 8.15 |
| 11 | -1 | -8  | 659.94 | 9.21 |
| 11 | -1 | -8  | 573.31 | 8.38 |
| 11 | -1 | -7  | 5.66   | 1.23 |
| 11 | -1 | -7  | 7.33   | 1.10 |

## CIF 31

|    |    |    |        |      |
|----|----|----|--------|------|
| 11 | -1 | -7 | 6.21   | 1.08 |
| 11 | -1 | -7 | 7.61   | 1.25 |
| 11 | -1 | -7 | 6.88   | 1.14 |
| 11 | -1 | -6 | 419.69 | 7.81 |
| 11 | -1 | -6 | 307.30 | 6.01 |
| 11 | -1 | -6 | 384.92 | 6.97 |
| 11 | -1 | -6 | 378.71 | 7.68 |
| 11 | -1 | -6 | 436.82 | 8.12 |
| 11 | -1 | -6 | 329.21 | 6.67 |
| 11 | -1 | -6 | 327.22 | 6.83 |
| 11 | -1 | -6 | 347.36 | 7.01 |
| 11 | -1 | -5 | 7.47   | 0.99 |
| 11 | -1 | -5 | 12.35  | 1.29 |
| 11 | -1 | -5 | 8.67   | 3.79 |
| 11 | -1 | -5 | 11.89  | 1.82 |
| 11 | -1 | -5 | 10.29  | 1.85 |
| 11 | -1 | -5 | 9.60   | 1.25 |
| 11 | -1 | -5 | 9.43   | 1.38 |
| 11 | -1 | -4 | 37.35  | 3.70 |
| 11 | -1 | -4 | 36.37  | 1.94 |
| 11 | -1 | -4 | 31.15  | 2.75 |
| 11 | -1 | -4 | 35.38  | 2.32 |
| 11 | -1 | -3 | 139.07 | 5.41 |
| 11 | -1 | -3 | 130.45 | 3.32 |
| 11 | -1 | -3 | 129.97 | 4.61 |
| 11 | -1 | -2 | 10.28  | 3.30 |
| 11 | -1 | -2 | 13.49  | 2.12 |
| 11 | -1 | -2 | 11.69  | 2.00 |
| 11 | -1 | -1 | 23.56  | 2.89 |
| 11 | -1 | -1 | 27.68  | 2.12 |
| 11 | -1 | 0  | 7.75   | 1.52 |
| 11 | 0  | -9 | 32.70  | 1.71 |
| 11 | 0  | -8 | 53.75  | 2.08 |
| 11 | 0  | -8 | 54.69  | 2.26 |
| 11 | 0  | -7 | 113.48 | 3.05 |
| 11 | 0  | -7 | 124.60 | 3.69 |
| 11 | 0  | -6 | 94.75  | 3.33 |
| 11 | 0  | -6 | 98.23  | 3.53 |
| 11 | 0  | -5 | 107.63 | 3.58 |
| 11 | 0  | -5 | 107.18 | 4.06 |
| 11 | 0  | -5 | 115.92 | 3.79 |

## CIF 31

|    |    |    |        |      |
|----|----|----|--------|------|
| 11 | 0  | -4 | 75.41  | 2.99 |
| 11 | 0  | -4 | 68.62  | 3.83 |
| 11 | 0  | -4 | 67.72  | 3.02 |
| 11 | 0  | -3 | 36.91  | 2.07 |
| 11 | 0  | -3 | 35.42  | 2.01 |
| 11 | 0  | -2 | 23.18  | 1.45 |
| 11 | 0  | -2 | 18.95  | 2.68 |
| 11 | 0  | -1 | 20.86  | 2.05 |
| 11 | 1  | -8 | 3.63   | 0.71 |
| 11 | 1  | -7 | 25.80  | 1.55 |
| 11 | 1  | -7 | 23.49  | 1.53 |
| 11 | 1  | -6 | 3.98   | 0.81 |
| 11 | 1  | -6 | 2.71   | 0.59 |
| 11 | 1  | -6 | 3.89   | 0.90 |
| 11 | 1  | -5 | 228.93 | 4.46 |
| 11 | 1  | -4 | 5.89   | 0.75 |
| 11 | 1  | -4 | 6.34   | 1.05 |
| 11 | 1  | -3 | 84.07  | 2.60 |
| 12 | -7 | -5 | 0.41   | 0.45 |
| 12 | -7 | -5 | 0.52   | 0.40 |
| 12 | -7 | -4 | 8.41   | 0.95 |
| 12 | -7 | -4 | 7.16   | 0.81 |
| 12 | -7 | -4 | 6.96   | 0.74 |
| 12 | -7 | -3 | 23.59  | 1.43 |
| 12 | -7 | -3 | 22.25  | 1.34 |
| 12 | -7 | -2 | 0.48   | 0.67 |
| 12 | -7 | -1 | 4.31   | 0.71 |
| 12 | -7 | -1 | 3.76   | 0.88 |
| 12 | -6 | -6 | 40.41  | 1.86 |
| 12 | -6 | -6 | 45.44  | 1.76 |
| 12 | -6 | -5 | 0.38   | 0.63 |
| 12 | -6 | -5 | 0.29   | 0.50 |
| 12 | -6 | -4 | 16.66  | 1.31 |
| 12 | -6 | -3 | 20.43  | 1.46 |
| 12 | -6 | -3 | 23.94  | 1.55 |
| 12 | -6 | -3 | 22.35  | 1.41 |
| 12 | -6 | -2 | 5.50   | 0.86 |
| 12 | -6 | -1 | 104.27 | 2.84 |
| 12 | -6 | -1 | 144.54 | 3.36 |
| 12 | -5 | -7 | 26.50  | 1.39 |
| 12 | -5 | -6 | 2.16   | 0.73 |

## CIF 31

|    |    |    |        |      |
|----|----|----|--------|------|
| 12 | -5 | -6 | 2.81   | 0.73 |
| 12 | -5 | -5 | 28.13  | 1.46 |
| 12 | -5 | -5 | 28.75  | 1.73 |
| 12 | -5 | -4 | 47.10  | 2.63 |
| 12 | -5 | -4 | 38.53  | 1.97 |
| 12 | -5 | -3 | 0.59   | 2.69 |
| 12 | -5 | -3 | 1.88   | 0.69 |
| 12 | -5 | -3 | 2.35   | 0.83 |
| 12 | -5 | -2 | 17.61  | 1.25 |
| 12 | -5 | -2 | 21.11  | 1.43 |
| 12 | -5 | -1 | 4.75   | 0.66 |
| 12 | -5 | -1 | 6.63   | 0.86 |
| 12 | -4 | -7 | 143.60 | 3.54 |
| 12 | -4 | -7 | 158.98 | 3.62 |
| 12 | -4 | -6 | 0.10   | 0.55 |
| 12 | -4 | -6 | 0.58   | 0.62 |
| 12 | -4 | -5 | 98.79  | 3.03 |
| 12 | -4 | -5 | 108.88 | 3.15 |
| 12 | -4 | -4 | 4.21   | 0.78 |
| 12 | -4 | -4 | 3.76   | 2.07 |
| 12 | -4 | -4 | 4.97   | 0.87 |
| 12 | -4 | -4 | 2.36   | 1.95 |
| 12 | -4 | -4 | 6.04   | 1.38 |
| 12 | -4 | -3 | 2.04   | 2.81 |
| 12 | -4 | -3 | 0.34   | 0.47 |
| 12 | -4 | -3 | 0.26   | 0.57 |
| 12 | -4 | -3 | 0.12   | 1.73 |
| 12 | -4 | -2 | 23.50  | 1.34 |
| 12 | -3 | -7 | 18.99  | 1.16 |
| 12 | -3 | -7 | 17.76  | 1.18 |
| 12 | -3 | -7 | 20.67  | 1.30 |
| 12 | -3 | -6 | 51.33  | 2.04 |
| 12 | -3 | -6 | 55.52  | 2.10 |
| 12 | -3 | -5 | 46.07  | 2.11 |
| 12 | -3 | -5 | 30.06  | 1.46 |
| 12 | -3 | -5 | 43.74  | 1.87 |
| 12 | -3 | -5 | 25.61  | 1.65 |
| 12 | -3 | -4 | 11.27  | 1.82 |
| 12 | -3 | -4 | 10.05  | 0.96 |
| 12 | -3 | -4 | 9.73   | 2.12 |
| 12 | -3 | -4 | 12.14  | 1.36 |

## CIF 31

|    |    |    |       |      |
|----|----|----|-------|------|
| 12 | -3 | -3 | 37.50 | 2.66 |
| 12 | -3 | -3 | 27.48 | 1.36 |
| 12 | -2 | -7 | 25.15 | 1.32 |
| 12 | -2 | -7 | 20.47 | 1.14 |
| 12 | -2 | -6 | 52.75 | 2.00 |
| 12 | -2 | -6 | 43.09 | 1.62 |
| 12 | -2 | -5 | 0.02  | 0.59 |
| 12 | -2 | -5 | 0.19  | 0.66 |
| 12 | -2 | -4 | 11.29 | 1.50 |
| 12 | -2 | -3 | 88.53 | 2.58 |
| 12 | -2 | -3 | 63.46 | 2.69 |
| 0  | 0  | 0  | 0.00  | 0.00 |

TITL HR001\_Sarpong in P1

REM P1 (#1 in standard setting)

CELL 1.54184 9.927627 10.752528 12.954794 99.7127 104.8560 110.2592

ZERR 23.00 0.000093 0.000108 0.000107 0.0008 0.0008 0.0009

LATT -1

SFAC C H N O

UNIT 23.00 23.00 23.00 23.00

TREF

HKLF 4

END

\_computing\_structure\_solution 'SHELXT 2014/5 (Sheldrick, 2014)'

\_computing\_structure\_solution 'SHELXT 2014/5 (Sheldrick, 2014)'

;

\_shelx\_hkl\_checksum 2073
