# Supplementary material
Source: PubMed Central journal article supplement (PMC6742481)
Supplement: NIHMS1048550-supplement-CIF_S3.pdf [file NIHMS1048550-supplement-CIF_S3.pdf]

## CIF S3

data\_sarpong135

\_audit\_creation\_method 'SHELXL-2014/7'  
\_shelx\_SHELXL\_version\_number '2014/7'  
\_chemical\_name\_systematic sarpong135  
\_chemical\_name\_common MLH-B1-115  
\_chemical\_melting\_point ?  
\_chemical\_formula\_moiety ?  
\_chemical\_formula\_sum  
'C26 H28 N2 O'  
\_chemical\_formula\_weight 384.50

loop\_

\_atom\_type\_symbol  
\_atom\_type\_description  
\_atom\_type\_scatter\_dispersion\_real  
\_atom\_type\_scatter\_dispersion\_imag  
\_atom\_type\_scatter\_source  
'C' 'C' 0.0181 0.0091  
'International Tables Vol C Tables 4.2.6.8 and 6.1.1.4'  
'H' 'H' 0.0000 0.0000  
'International Tables Vol C Tables 4.2.6.8 and 6.1.1.4'  
'N' 'N' 0.0311 0.0180  
'International Tables Vol C Tables 4.2.6.8 and 6.1.1.4'  
'O' 'O' 0.0492 0.0322  
'International Tables Vol C Tables 4.2.6.8 and 6.1.1.4'

\_space\_group\_crystal\_system orthorhombic  
\_space\_group\_IT\_number 19  
\_space\_group\_name\_H-M\_alt 'P 21 21 21'  
\_space\_group\_name\_Hall 'P 2ac 2ab'

\_diffraction\_reflection\_scan\_width 2.0  
\_diffraction\_reflection\_scan\_rate 20  
\_space\_group\_centring\_type primitive

\_shelx\_space\_group\_comment

;

The symmetry employed for this shelxl refinement is uniquely defined

## CIF S3

by the following loop, which should always be used as a source of symmetry information in preference to the above space-group names. They are only intended as comments.

;

loop\_

\_space\_group\_symop\_operation\_xyz

'x, y, z'

'-x+1/2, -y, z+1/2'

'-x, y+1/2, -z+1/2'

'x+1/2, -y+1/2, -z'

\_cell\_length\_a 9.2170(3)  
\_cell\_length\_b 12.9842(4)  
\_cell\_length\_c 17.6732(6)  
\_cell\_angle\_alpha 90  
\_cell\_angle\_beta 90  
\_cell\_angle\_gamma 90  
\_cell\_volume 2115.05(12)  
\_cell\_formula\_units\_Z 4  
\_cell\_measurement\_temperature 100(2)  
\_cell\_measurement\_reflns\_used 9917  
\_cell\_measurement\_theta\_min 4.23  
\_cell\_measurement\_theta\_max 68.12

\_exptl\_crystal\_description needle  
\_exptl\_crystal\_colour colorless  
\_exptl\_crystal\_density\_meas ?  
\_exptl\_crystal\_density\_method ?  
\_exptl\_crystal\_density\_diffn 1.208  
\_exptl\_crystal\_F\_000 824  
\_exptl\_transmission\_factor\_min ?  
\_exptl\_transmission\_factor\_max ?  
\_exptl\_crystal\_size\_max 0.060  
\_exptl\_crystal\_size\_mid 0.020  
\_exptl\_crystal\_size\_min 0.020  
\_exptl\_absorpt\_coefficient\_mu 0.568  
\_shelx\_estimated\_absorpt\_T\_min 0.967  
\_shelx\_estimated\_absorpt\_T\_max 0.989  
\_exptl\_absorpt\_correction\_type multi-scan  
\_exptl\_absorpt\_correction\_T\_min 0.809

## CIF S3

```
_exptl_absorpt_correction_T_max 0.929
_exptl_absorpt_process_details SADABS
_exptl_absorpt_special_details ?
_diffrn_ambient_temperature 100(2)
_diffrn_radiation_wavelength 1.54178
_diffrn_radiation_type CuK $\alpha$ 
_diffrn_source 'microfocus rotating anode'
_diffrn_measurement_device_type 'Bruker APEX-II CCD'
_diffrn_measurement_method ' $\omega$  and  $\omega$  scans'
_diffrn_detector_area_resol_mean 8.366
_diffrn_reflns_number 30752
_diffrn_reflns_av_unetl/netl 0.0300
_diffrn_reflns_av_R_equivalents 0.0559
_diffrn_reflns_limit_h_min -11
_diffrn_reflns_limit_h_max 10
_diffrn_reflns_limit_k_min -15
_diffrn_reflns_limit_k_max 15
_diffrn_reflns_limit_l_min -21
_diffrn_reflns_limit_l_max 21
_diffrn_reflns_theta_min 4.225
_diffrn_reflns_theta_max 68.345
_diffrn_reflns_theta_full 67.000
_diffrn_measured_fraction_theta_max 0.994
_diffrn_measured_fraction_theta_full 0.997
_diffrn_reflns_Laue_measured_fraction_max 0.994
_diffrn_reflns_Laue_measured_fraction_full 0.997
_diffrn_reflns_point_group_measured_fraction_max 0.992
_diffrn_reflns_point_group_measured_fraction_full 0.995
_reflns_number_total 3856
_reflns_number_gt 3495
_reflns_threshold_expression ' $I > 2\sigma(I)$ '
_reflns_Friedel_coverage 0.744
_reflns_Friedel_fraction_max 0.989
_reflns_Friedel_fraction_full 0.993

_reflns_special_details
;
Reflections were merged by SHELXL according to the crystal
class for the calculation of statistics and refinement.

_reflns_Friedel_fraction is defined as the number of unique
```

CIF S3

Friedel pairs measured divided by the number that would be possible theoretically, ignoring centric projections and systematic absences.

;

```
_computing_data_collection      'Bruker APEX2'
_computing_cell_refinement      'Bruker SAINT'
_computing_data_reduction       'Bruker SAINT'
_computing_structure_solution   'SHELXT-2014'
_computing_structure_refinement 'SHELXL-2014'
_computing_molecular_graphics   'ORTEP-32'
_computing_publication_material 'WinGX'
_refine_special_details         ?
_refine_ls_structure_factor_coef Fsqd
_refine_ls_matrix_type          full
_refine_ls_weighting_scheme     calc
_refine_ls_weighting_details
'w=1/[ws2(Fo2)+(0.0530P)2+0.7082P] where P=(Fo2+2Fc2)/3'
_atom_sites_solution_primary    iterative
_atom_sites_solution_secondary  difmap
_atom_sites_solution_hydrogens  geom
_refine_ls_hydrogen_treatment   constr
_refine_ls_extinction_method    none
_refine_ls_extinction_coef      .
_refine_ls_abs_structure_details
```

;

Flack x determined using 1402 quotients [(I+)-(I-)]/[(I+)+(I-)] (Parsons, Flack and Wagner, Acta Cryst. B69 (2013) 249-259).

;

```
_refine_ls_abs_structure_Flack  0.00(17)
_chemical_absolute_configuration ad
_refine_ls_number_reflns        3856
_refine_ls_number_parameters    267
_refine_ls_number_restraints    0
_refine_ls_R_factor_all         0.0460
_refine_ls_R_factor_gt         0.0402
_refine_ls_wR_factor_ref        0.1044
_refine_ls_wR_factor_gt        0.1002
_refine_ls_goodness_of_fit_ref  1.027
_refine_ls_restrained_S_all     1.027
_refine_ls_shift/su_max         0.000
```

\_refine\_ls\_shift/su\_mean        0.000

loop\_

\_atom\_site\_label

\_atom\_site\_type\_symbol

\_atom\_site\_fract\_x

\_atom\_site\_fract\_y

\_atom\_site\_fract\_z

\_atom\_site\_U\_iso\_or\_equiv

\_atom\_site\_adp\_type

\_atom\_site\_occupancy

\_atom\_site\_site\_symmetry\_order

\_atom\_site\_calc\_flag

\_atom\_site\_refinement\_flags\_posn

\_atom\_site\_refinement\_flags\_adp

\_atom\_site\_refinement\_flags\_occupancy

\_atom\_site\_disorder\_assembly

\_atom\_site\_disorder\_group

C1 C 0.6365(3) 0.5390(2) 0.41450(15) 0.0257(6) Uani 1 1 d . . . . .  
C2 C 0.7261(3) 0.6419(2) 0.40057(15) 0.0284(6) Uani 1 1 d . . . . .  
C3 C 0.8779(3) 0.6098(2) 0.37285(16) 0.0308(6) Uani 1 1 d . . . . .  
C4 C 0.8813(3) 0.5400(2) 0.30539(17) 0.0344(7) Uani 1 1 d . . . . .  
H4A H 0.9833 0.5245 0.2920 0.041 Uiso 1 1 calc R U . . .  
H4B H 0.8359 0.5752 0.2617 0.041 Uiso 1 1 calc R U . . .  
C5 C 0.8003(3) 0.4392(2) 0.32156(15) 0.0259(6) Uani 1 1 d . . . . .  
H5 H 0.8486 0.4076 0.3666 0.031 Uiso 1 1 calc R U . . .  
C6 C 0.8158(3) 0.3597(2) 0.25530(15) 0.0286(6) Uani 1 1 d . . . . .  
C7 C 0.7337(3) 0.2622(2) 0.27641(14) 0.0258(6) Uani 1 1 d . . . . .  
C8 C 0.7577(3) 0.1644(2) 0.24830(15) 0.0311(6) Uani 1 1 d . . . . .  
H8 H 0.8311 0.1541 0.2113 0.037 Uiso 1 1 calc R U . . .  
C9 C 0.6756(3) 0.0804(2) 0.27337(17) 0.0341(7) Uani 1 1 d . . . . .  
H9 H 0.6953 0.0142 0.2529 0.041 Uiso 1 1 calc R U . . .  
C10 C 0.5665(3) 0.0904(2) 0.32703(17) 0.0327(7) Uani 1 1 d . . . . .  
H10 H 0.5139 0.0325 0.3450 0.039 Uiso 1 1 calc R U . . .  
C11 C 0.5380(3) 0.1894(2) 0.35320(15) 0.0281(6) Uani 1 1 d . . . . .  
C12 C 0.6201(3) 0.2732(2) 0.32781(14) 0.0247(5) Uani 1 1 d . . . . .  
C13 C 0.5667(3) 0.3642(2) 0.36335(14) 0.0240(5) Uani 1 1 d . . . . .  
C14 C 0.4544(3) 0.3346(2) 0.40944(16) 0.0289(6) Uani 1 1 d . . . . .  
C15 C 0.3544(3) 0.3933(2) 0.46149(17) 0.0337(7) Uani 1 1 d . . . . .  
C16 C 0.3691(3) 0.5083(2) 0.45250(16) 0.0356(7) Uani 1 1 d . . . . .  
H16 H 0.2817 0.5451 0.4616 0.043 Uiso 1 1 calc R U . . .

## CIF S3

C17 C 0.4804(3) 0.5679(2) 0.43439(16) 0.0312(6) Uani 1 1 d . . . . .  
H17 H 0.4601 0.6397 0.4337 0.037 Uiso 1 1 calc R U . . .  
C18 C 0.6419(3) 0.4637(2) 0.34578(14) 0.0243(6) Uani 1 1 d . . . . .  
H18 H 0.5911 0.4970 0.3021 0.029 Uiso 1 1 calc R U . . .  
C19 C 0.7052(3) 0.4845(2) 0.47858(15) 0.0274(6) Uani 1 1 d . . . . .  
C20 C 0.7416(3) 0.7054(2) 0.47305(16) 0.0358(7) Uani 1 1 d . . . . .  
H20A H 0.8004 0.7667 0.4627 0.054 Uiso 1 1 calc R U . . .  
H20B H 0.7891 0.6636 0.5121 0.054 Uiso 1 1 calc R U . . .  
H20C H 0.6454 0.7264 0.4908 0.054 Uiso 1 1 calc R U . . .  
C21 C 0.6545(3) 0.7024(2) 0.33682(16) 0.0347(7) Uani 1 1 d . . . . .  
H21 H 0.6055 0.6636 0.2991 0.042 Uiso 1 1 calc R U . . .  
C22 C 0.6538(4) 0.8021(3) 0.3290(2) 0.0507(9) Uani 1 1 d . . . . .  
H22A H 0.7012 0.8444 0.3652 0.061 Uiso 1 1 calc R U . . .  
H22B H 0.6058 0.8326 0.2870 0.061 Uiso 1 1 calc R U . . .  
C23 C 0.7536(4) 0.4012(2) 0.18122(16) 0.0407(8) Uani 1 1 d . . . . .  
H23A H 0.7649 0.3493 0.1414 0.061 Uiso 1 1 calc R U . . .  
H23B H 0.8056 0.4640 0.1668 0.061 Uiso 1 1 calc R U . . .  
H23C H 0.6504 0.4169 0.1880 0.061 Uiso 1 1 calc R U . . .  
C24 C 0.9770(3) 0.3338(3) 0.2439(2) 0.0436(8) Uani 1 1 d . . . . .  
H24A H 1.0166 0.3047 0.2906 0.065 Uiso 1 1 calc R U . . .  
H24B H 1.0302 0.3967 0.2308 0.065 Uiso 1 1 calc R U . . .  
H24C H 0.9869 0.2836 0.2028 0.065 Uiso 1 1 calc R U . . .  
C25 C 0.1951(3) 0.3651(3) 0.4424(2) 0.0463(8) Uani 1 1 d . . . . .  
H25A H 0.1295 0.4034 0.4759 0.070 Uiso 1 1 calc R U . . .  
H25B H 0.1804 0.2910 0.4498 0.070 Uiso 1 1 calc R U . . .  
H25C H 0.1745 0.3831 0.3897 0.070 Uiso 1 1 calc R U . . .  
C26 C 0.3836(4) 0.3629(3) 0.54467(17) 0.0430(8) Uani 1 1 d . . . . .  
H26A H 0.4845 0.3789 0.5576 0.064 Uiso 1 1 calc R U . . .  
H26B H 0.3664 0.2889 0.5512 0.064 Uiso 1 1 calc R U . . .  
H26C H 0.3183 0.4016 0.5780 0.064 Uiso 1 1 calc R U . . .  
N1 N 0.4384(2) 0.22827(18) 0.40320(13) 0.0302(5) Uani 1 1 d . . . . .  
H1 H 0.3737 0.1914 0.4278 0.036 Uiso 1 1 calc R U . . .  
N2 N 0.7626(3) 0.44041(19) 0.52596(14) 0.0349(6) Uani 1 1 d . . . . .  
O1 O 0.9871(2) 0.63868(18) 0.40442(13) 0.0408(5) Uani 1 1 d . . . . .

loop\_

\_atom\_site\_aniso\_label  
\_atom\_site\_aniso\_U\_11  
\_atom\_site\_aniso\_U\_22  
\_atom\_site\_aniso\_U\_33  
\_atom\_site\_aniso\_U\_23

## CIF S3

\_atom\_site\_aniso\_U\_13

\_atom\_site\_aniso\_U\_12

C1 0.0309(14) 0.0251(13) 0.0210(12) 0.0008(10) 0.0021(11) 0.0004(11)  
C2 0.0394(15) 0.0227(13) 0.0231(13) 0.0008(11) 0.0000(12) -0.0014(12)  
C3 0.0377(16) 0.0281(15) 0.0266(14) 0.0060(11) 0.0034(13) -0.0059(12)  
C4 0.0356(15) 0.0336(16) 0.0340(15) -0.0001(12) 0.0091(13) -0.0056(13)  
C5 0.0281(14) 0.0272(14) 0.0223(12) 0.0008(11) 0.0026(11) -0.0008(11)  
C6 0.0309(13) 0.0317(14) 0.0232(13) -0.0011(12) 0.0026(11) 0.0019(12)  
C7 0.0261(13) 0.0298(14) 0.0216(12) -0.0016(10) -0.0058(11) 0.0006(11)  
C8 0.0312(14) 0.0344(15) 0.0278(14) -0.0040(11) -0.0032(12) 0.0047(12)  
C9 0.0377(16) 0.0293(15) 0.0352(16) -0.0060(12) -0.0100(13) 0.0027(12)  
C10 0.0363(16) 0.0291(14) 0.0327(15) 0.0010(12) -0.0120(13) -0.0052(12)  
C11 0.0295(14) 0.0316(15) 0.0233(13) 0.0005(11) -0.0067(11) -0.0033(11)  
C12 0.0277(13) 0.0257(13) 0.0206(12) 0.0004(10) -0.0048(11) 0.0004(11)  
C13 0.0260(12) 0.0252(13) 0.0208(12) 0.0009(11) -0.0012(10) 0.0006(11)  
C14 0.0300(14) 0.0317(15) 0.0251(13) 0.0014(11) -0.0019(12) -0.0022(11)  
C15 0.0287(14) 0.0395(17) 0.0330(15) 0.0022(12) 0.0060(13) -0.0027(12)  
C16 0.0340(15) 0.0423(17) 0.0303(15) -0.0044(13) 0.0054(13) 0.0064(13)  
C17 0.0347(15) 0.0307(15) 0.0282(14) -0.0013(11) 0.0029(12) 0.0057(12)  
C18 0.0294(14) 0.0242(13) 0.0193(12) 0.0016(10) 0.0002(11) 0.0004(11)  
C19 0.0343(15) 0.0284(14) 0.0195(13) -0.0032(12) 0.0050(11) -0.0016(11)  
C20 0.0450(17) 0.0334(16) 0.0291(14) -0.0025(12) -0.0005(14) -0.0033(14)  
C21 0.0445(18) 0.0278(15) 0.0318(15) 0.0028(12) -0.0047(13) -0.0050(13)  
C22 0.057(2) 0.0356(18) 0.059(2) 0.0081(16) -0.0211(18) 0.0019(16)  
C23 0.063(2) 0.0376(16) 0.0216(13) 0.0012(12) 0.0023(15) 0.0007(15)  
C24 0.0329(16) 0.0423(18) 0.056(2) -0.0161(15) 0.0106(15) -0.0034(13)  
C25 0.0313(15) 0.052(2) 0.055(2) -0.0030(18) 0.0074(15) -0.0042(15)  
C26 0.0440(17) 0.053(2) 0.0323(16) 0.0055(15) 0.0131(14) -0.0016(16)  
N1 0.0306(12) 0.0309(13) 0.0291(12) 0.0055(10) 0.0020(10) -0.0079(10)  
N2 0.0445(14) 0.0347(13) 0.0254(12) 0.0009(11) -0.0010(12) 0.0048(11)  
O1 0.0386(11) 0.0439(12) 0.0398(12) -0.0017(10) -0.0004(10) -0.0101(10)

\_geom\_special\_details

;

All esds (except the esd in the dihedral angle between two l.s. planes) are estimated using the full covariance matrix. The cell esds are taken into account individually in the estimation of esds in distances, angles and torsion angles; correlations between esds in cell parameters are only used when they are defined by crystal symmetry. An approximate (isotropic) treatment of cell esds is used for estimating esds involving l.s. planes.

;

loop\_  
\_geom\_bond\_atom\_site\_label\_1  
\_geom\_bond\_atom\_site\_label\_2  
\_geom\_bond\_distance  
\_geom\_bond\_site\_symmetry\_2  
\_geom\_bond\_publ\_flag  
C1 C19 1.478(4) . ?  
C1 C17 1.528(4) . ?  
C1 C18 1.560(4) . ?  
C1 C2 1.590(4) . ?  
C2 C21 1.524(4) . ?  
C2 C20 1.530(4) . ?  
C2 C3 1.540(4) . ?  
C3 O1 1.210(4) . ?  
C3 C4 1.498(4) . ?  
C4 C5 1.533(4) . ?  
C4 H4A 0.9900 . ?  
C4 H4B 0.9900 . ?  
C5 C18 1.555(4) . ?  
C5 C6 1.568(4) . ?  
C5 H5 1.0000 . ?  
C6 C7 1.521(4) . ?  
C6 C23 1.528(4) . ?  
C6 C24 1.536(4) . ?  
C7 C8 1.381(4) . ?  
C7 C12 1.393(4) . ?  
C8 C9 1.399(4) . ?  
C8 H8 0.9500 . ?  
C9 C10 1.389(4) . ?  
C9 H9 0.9500 . ?  
C10 C11 1.391(4) . ?  
C10 H10 0.9500 . ?  
C11 N1 1.371(4) . ?  
C11 C12 1.399(4) . ?  
C12 C13 1.425(4) . ?  
C13 C14 1.372(4) . ?  
C13 C18 1.499(4) . ?  
C14 N1 1.393(4) . ?  
C14 C15 1.508(4) . ?  
C15 C16 1.508(4) . ?



## CIF S3

C15 C26 1.545(4) . ?  
C15 C25 1.551(4) . ?  
C16 C17 1.324(4) . ?  
C16 H16 0.9500 . ?  
C17 H17 0.9500 . ?  
C18 H18 1.0000 . ?  
C19 N2 1.144(4) . ?  
C20 H20A 0.9800 . ?  
C20 H20B 0.9800 . ?  
C20 H20C 0.9800 . ?  
C21 C22 1.302(4) . ?  
C21 H21 0.9500 . ?  
C22 H22A 0.9500 . ?  
C22 H22B 0.9500 . ?  
C23 H23A 0.9800 . ?  
C23 H23B 0.9800 . ?  
C23 H23C 0.9800 . ?  
C24 H24A 0.9800 . ?  
C24 H24B 0.9800 . ?  
C24 H24C 0.9800 . ?  
C25 H25A 0.9800 . ?  
C25 H25B 0.9800 . ?  
C25 H25C 0.9800 . ?  
C26 H26A 0.9800 . ?  
C26 H26B 0.9800 . ?  
C26 H26C 0.9800 . ?  
N1 H1 0.8800 . ?

loop\_

\_geom\_angle\_atom\_site\_label\_1  
\_geom\_angle\_atom\_site\_label\_2  
\_geom\_angle\_atom\_site\_label\_3  
\_geom\_angle  
\_geom\_angle\_site\_symmetry\_1  
\_geom\_angle\_site\_symmetry\_3  
\_geom\_angle\_publ\_flag  
C19 C1 C17 110.2(2) . . ?  
C19 C1 C18 106.5(2) . . ?  
C17 C1 C18 111.3(2) . . ?  
C19 C1 C2 107.4(2) . . ?  
C17 C1 C2 108.5(2) . . ?

## CIF S3

C18 C1 C2 112.9(2) . . ?  
C21 C2 C20 112.4(2) . . ?  
C21 C2 C3 107.3(2) . . ?  
C20 C2 C3 109.1(2) . . ?  
C21 C2 C1 108.8(2) . . ?  
C20 C2 C1 111.8(2) . . ?  
C3 C2 C1 107.1(2) . . ?  
O1 C3 C4 122.5(3) . . ?  
O1 C3 C2 121.7(2) . . ?  
C4 C3 C2 115.9(2) . . ?  
C3 C4 C5 110.9(2) . . ?  
C3 C4 H4A 109.5 . . ?  
C5 C4 H4A 109.5 . . ?  
C3 C4 H4B 109.5 . . ?  
C5 C4 H4B 109.5 . . ?  
H4A C4 H4B 108.0 . . ?  
C4 C5 C18 109.5(2) . . ?  
C4 C5 C6 112.3(2) . . ?  
C18 C5 C6 115.2(2) . . ?  
C4 C5 H5 106.4 . . ?  
C18 C5 H5 106.4 . . ?  
C6 C5 H5 106.4 . . ?  
C7 C6 C23 108.5(2) . . ?  
C7 C6 C24 109.4(2) . . ?  
C23 C6 C24 109.1(3) . . ?  
C7 C6 C5 108.6(2) . . ?  
C23 C6 C5 111.9(2) . . ?  
C24 C6 C5 109.3(2) . . ?  
C8 C7 C12 116.7(2) . . ?  
C8 C7 C6 126.6(2) . . ?  
C12 C7 C6 116.7(2) . . ?  
C7 C8 C9 121.1(3) . . ?  
C7 C8 H8 119.5 . . ?  
C9 C8 H8 119.5 . . ?  
C10 C9 C8 122.3(3) . . ?  
C10 C9 H9 118.8 . . ?  
C8 C9 H9 118.8 . . ?  
C9 C10 C11 116.8(3) . . ?  
C9 C10 H10 121.6 . . ?  
C11 C10 H10 121.6 . . ?  
N1 C11 C10 132.9(3) . . ?

## CIF S3

N1 C11 C12 106.4(2) . . ?  
C10 C11 C12 120.6(3) . . ?  
C7 C12 C11 122.4(2) . . ?  
C7 C12 C13 129.2(2) . . ?  
C11 C12 C13 108.4(2) . . ?  
C14 C13 C12 106.9(2) . . ?  
C14 C13 C18 135.4(3) . . ?  
C12 C13 C18 117.6(2) . . ?  
C13 C14 N1 108.1(2) . . ?  
C13 C14 C15 133.0(3) . . ?  
N1 C14 C15 119.0(2) . . ?  
C16 C15 C14 112.4(2) . . ?  
C16 C15 C26 109.7(3) . . ?  
C14 C15 C26 110.2(2) . . ?  
C16 C15 C25 107.2(3) . . ?  
C14 C15 C25 109.1(3) . . ?  
C26 C15 C25 108.1(3) . . ?  
C17 C16 C15 132.4(3) . . ?  
C17 C16 H16 113.8 . . ?  
C15 C16 H16 113.8 . . ?  
C16 C17 C1 129.9(3) . . ?  
C16 C17 H17 115.1 . . ?  
C1 C17 H17 115.1 . . ?  
C13 C18 C5 108.3(2) . . ?  
C13 C18 C1 111.4(2) . . ?  
C5 C18 C1 111.9(2) . . ?  
C13 C18 H18 108.4 . . ?  
C5 C18 H18 108.4 . . ?  
C1 C18 H18 108.4 . . ?  
N2 C19 C1 176.9(3) . . ?  
C2 C20 H20A 109.5 . . ?  
C2 C20 H20B 109.5 . . ?  
H20A C20 H20B 109.5 . . ?  
C2 C20 H20C 109.5 . . ?  
H20A C20 H20C 109.5 . . ?  
H20B C20 H20C 109.5 . . ?  
C22 C21 C2 126.4(3) . . ?  
C22 C21 H21 116.8 . . ?  
C2 C21 H21 116.8 . . ?  
C21 C22 H22A 120.0 . . ?  
C21 C22 H22B 120.0 . . ?

CIF S3

H22A C22 H22B 120.0 . . ?  
C6 C23 H23A 109.5 . . ?  
C6 C23 H23B 109.5 . . ?  
H23A C23 H23B 109.5 . . ?  
C6 C23 H23C 109.5 . . ?  
H23A C23 H23C 109.5 . . ?  
H23B C23 H23C 109.5 . . ?  
C6 C24 H24A 109.5 . . ?  
C6 C24 H24B 109.5 . . ?  
H24A C24 H24B 109.5 . . ?  
C6 C24 H24C 109.5 . . ?  
H24A C24 H24C 109.5 . . ?  
H24B C24 H24C 109.5 . . ?  
C15 C25 H25A 109.5 . . ?  
C15 C25 H25B 109.5 . . ?  
H25A C25 H25B 109.5 . . ?  
C15 C25 H25C 109.5 . . ?  
H25A C25 H25C 109.5 . . ?  
H25B C25 H25C 109.5 . . ?  
C15 C26 H26A 109.5 . . ?  
C15 C26 H26B 109.5 . . ?  
H26A C26 H26B 109.5 . . ?  
C15 C26 H26C 109.5 . . ?  
H26A C26 H26C 109.5 . . ?  
H26B C26 H26C 109.5 . . ?  
C11 N1 C14 110.2(2) . . ?  
C11 N1 H1 124.9 . . ?  
C14 N1 H1 124.9 . . ?

\_refine\_diff\_density\_max 0.706  
\_refine\_diff\_density\_min -0.161  
\_refine\_diff\_density\_rms 0.037

\_shelx\_res\_file  
;

shelx.res created by SHELXL-2014/7

TITL sarpong135\_0m\_a.res in P2(1)2(1)2(1)  
CELL 1.54178 9.2170 12.9842 17.6732 90.000 90.000 90.000  
ZERR 4.00 0.0003 0.0004 0.0006 0.000 0.000 0.000

## CIF S3

LATT -1  
SYMM 1/2 - X, - Y, 1/2 + Z  
SYMM - X, 1/2 + Y, 1/2 - Z  
SYMM 1/2 + X, 1/2 - Y, - Z  
SFAC C H N O  
UNIT 104 112 8 4  
MERG 2  
FMAP 2  
PLAN 20  
SIZE 0.020 0.020 0.060  
ACTA 134.00  
BOND \$H  
LIST 4  
WPDB -2  
L.S. 10  
TEMP -173.00  
WGHT 0.053000 0.708200  
FVAR 0.22532  
C1 1 0.636528 0.539003 0.414495 11.00000 0.03089 0.02512 =  
0.02098 0.00080 0.00210 0.00038  
C2 1 0.726077 0.641892 0.400569 11.00000 0.03940 0.02274 =  
0.02310 0.00079 0.00002 -0.00137  
C3 1 0.877878 0.609811 0.372852 11.00000 0.03769 0.02812 =  
0.02657 0.00598 0.00342 -0.00592  
C4 1 0.881335 0.540037 0.305391 11.00000 0.03561 0.03361 =  
0.03398 -0.00011 0.00912 -0.00559  
AFIX 23  
H4A 2 0.983336 0.524518 0.292044 11.00000 -1.20000  
H4B 2 0.835900 0.575197 0.261697 11.00000 -1.20000  
AFIX 0  
C5 1 0.800344 0.439250 0.321562 11.00000 0.02810 0.02720 =  
0.02235 0.00083 0.00255 -0.00082  
AFIX 13  
H5 2 0.848593 0.407580 0.366585 11.00000 -1.20000  
AFIX 0  
C6 1 0.815831 0.359665 0.255300 11.00000 0.03094 0.03165 =  
0.02323 -0.00113 0.00261 0.00193  
C7 1 0.733660 0.262238 0.276415 11.00000 0.02606 0.02976 =  
0.02155 -0.00165 -0.00582 0.00061  
C8 1 0.757666 0.164446 0.248300 11.00000 0.03121 0.03439 =  
0.02778 -0.00400 -0.00315 0.00472

## CIF S3

|      |    |          |          |          |          |          |           |  |
|------|----|----------|----------|----------|----------|----------|-----------|--|
| AFIX | 43 |          |          |          |          |          |           |  |
| H8   | 2  | 0.831068 | 0.154060 | 0.211343 | 11.00000 | -1.20000 |           |  |
| AFIX | 0  |          |          |          |          |          |           |  |
| C9   | 1  | 0.675626 | 0.080432 | 0.273369 | 11.00000 | 0.03773  | 0.02932 = |  |
|      |    | 0.03521  | -0.00601 | -0.00999 | 0.00268  |          |           |  |
| AFIX | 43 |          |          |          |          |          |           |  |
| H9   | 2  | 0.695288 | 0.014205 | 0.252950 | 11.00000 | -1.20000 |           |  |
| AFIX | 0  |          |          |          |          |          |           |  |
| C10  | 1  | 0.566498 | 0.090431 | 0.327033 | 11.00000 | 0.03629  | 0.02912 = |  |
|      |    | 0.03269  | 0.00098  | -0.01205 | -0.00524 |          |           |  |
| AFIX | 43 |          |          |          |          |          |           |  |
| H10  | 2  | 0.513853 | 0.032479 | 0.345003 | 11.00000 | -1.20000 |           |  |
| AFIX | 0  |          |          |          |          |          |           |  |
| C11  | 1  | 0.538007 | 0.189400 | 0.353200 | 11.00000 | 0.02946  | 0.03163 = |  |
|      |    | 0.02328  | 0.00049  | -0.00670 | -0.00326 |          |           |  |
| C12  | 1  | 0.620127 | 0.273212 | 0.327813 | 11.00000 | 0.02774  | 0.02571 = |  |
|      |    | 0.02059  | 0.00041  | -0.00477 | 0.00036  |          |           |  |
| C13  | 1  | 0.566736 | 0.364156 | 0.363346 | 11.00000 | 0.02603  | 0.02517 = |  |
|      |    | 0.02079  | 0.00090  | -0.00120 | 0.00064  |          |           |  |
| C14  | 1  | 0.454376 | 0.334621 | 0.409436 | 11.00000 | 0.03001  | 0.03166 = |  |
|      |    | 0.02509  | 0.00135  | -0.00187 | -0.00220 |          |           |  |
| C15  | 1  | 0.354437 | 0.393294 | 0.461495 | 11.00000 | 0.02874  | 0.03950 = |  |
|      |    | 0.03299  | 0.00218  | 0.00601  | -0.00267 |          |           |  |
| C16  | 1  | 0.369128 | 0.508345 | 0.452496 | 11.00000 | 0.03404  | 0.04235 = |  |
|      |    | 0.03031  | -0.00444 | 0.00545  | 0.00639  |          |           |  |
| AFIX | 43 |          |          |          |          |          |           |  |
| H16  | 2  | 0.281735 | 0.545119 | 0.461562 | 11.00000 | -1.20000 |           |  |
| AFIX | 0  |          |          |          |          |          |           |  |
| C17  | 1  | 0.480418 | 0.567941 | 0.434390 | 11.00000 | 0.03470  | 0.03065 = |  |
|      |    | 0.02817  | -0.00126 | 0.00290  | 0.00569  |          |           |  |
| AFIX | 43 |          |          |          |          |          |           |  |
| H17  | 2  | 0.460102 | 0.639664 | 0.433655 | 11.00000 | -1.20000 |           |  |
| AFIX | 0  |          |          |          |          |          |           |  |
| C18  | 1  | 0.641907 | 0.463738 | 0.345784 | 11.00000 | 0.02943  | 0.02417 = |  |
|      |    | 0.01930  | 0.00164  | 0.00016  | 0.00043  |          |           |  |
| AFIX | 13 |          |          |          |          |          |           |  |
| H18  | 2  | 0.591135 | 0.496960 | 0.302140 | 11.00000 | -1.20000 |           |  |
| AFIX | 0  |          |          |          |          |          |           |  |
| C19  | 1  | 0.705207 | 0.484532 | 0.478579 | 11.00000 | 0.03431  | 0.02835 = |  |
|      |    | 0.01955  | -0.00324 | 0.00504  | -0.00162 |          |           |  |
| C20  | 1  | 0.741645 | 0.705360 | 0.473046 | 11.00000 | 0.04496  | 0.03341 = |  |

## CIF S3

0.02914 -0.00250 -0.00046 -0.00335

AFIX 137

H20A 2 0.800393 0.766675 0.462708 11.00000 -1.50000

H20B 2 0.789135 0.663649 0.512063 11.00000 -1.50000

H20C 2 0.645378 0.726413 0.490795 11.00000 -1.50000

AFIX 0

C21 1 0.654474 0.702419 0.336823 11.00000 0.04452 0.02782 =

0.03177 0.00285 -0.00471 -0.00497

AFIX 43

H21 2 0.605517 0.663569 0.299101 11.00000 -1.20000

AFIX 0

C22 1 0.653774 0.802097 0.328958 11.00000 0.05698 0.03558 =

0.05945 0.00813 -0.02105 0.00194

AFIX 93

H22A 2 0.701236 0.844355 0.365192 11.00000 -1.20000

H22B 2 0.605802 0.832585 0.286984 11.00000 -1.20000

AFIX 0

C23 1 0.753596 0.401196 0.181220 11.00000 0.06289 0.03763 =

0.02163 0.00122 0.00231 0.00066

AFIX 137

H23A 2 0.764857 0.349312 0.141378 11.00000 -1.50000

H23B 2 0.805603 0.464025 0.166780 11.00000 -1.50000

H23C 2 0.650406 0.416893 0.187980 11.00000 -1.50000

AFIX 0

C24 1 0.976957 0.333847 0.243852 11.00000 0.03294 0.04232 =

0.05553 -0.01606 0.01059 -0.00340

AFIX 137

H24A 2 1.016568 0.304710 0.290648 11.00000 -1.50000

H24B 2 1.030200 0.396726 0.230824 11.00000 -1.50000

H24C 2 0.986913 0.283633 0.202781 11.00000 -1.50000

AFIX 0

C25 1 0.195067 0.365094 0.442448 11.00000 0.03132 0.05243 =

0.05527 -0.00295 0.00739 -0.00424

AFIX 137

H25A 2 0.129530 0.403357 0.475860 11.00000 -1.50000

H25B 2 0.180448 0.291002 0.449771 11.00000 -1.50000

H25C 2 0.174513 0.383102 0.389676 11.00000 -1.50000

AFIX 0

C26 1 0.383582 0.362909 0.544668 11.00000 0.04396 0.05266 =

0.03230 0.00550 0.01312 -0.00156

AFIX 137

## CIF S3

H26A 2 0.484477 0.378890 0.557637 11.00000 -1.50000  
 H26B 2 0.366416 0.288948 0.551154 11.00000 -1.50000  
 H26C 2 0.318334 0.401622 0.577954 11.00000 -1.50000  
 AFIX 0  
 N1 3 0.438386 0.228272 0.403198 11.00000 0.03064 0.03088 =  
 0.02910 0.00548 0.00197 -0.00790  
 AFIX 43  
 H1 2 0.373670 0.191378 0.427804 11.00000 -1.20000  
 AFIX 0  
 N2 3 0.762619 0.440413 0.525962 11.00000 0.04447 0.03471 =  
 0.02540 0.00091 -0.00099 0.00476  
 O1 4 0.987060 0.638682 0.404419 11.00000 0.03862 0.04394 =  
 0.03978 -0.00169 -0.00042 -0.01013  
 HKLF 4

REM sarpong135\_0m\_a.res in P2(1)2(1)2(1)

REM R1 = 0.0402 for 3495  $F_o > 4\text{sig}(F_o)$  and 0.0460 for all 3856 data

REM 267 parameters refined using 0 restraints

END

WGHT 0.0530 0.7082

REM Highest difference peak 0.706, deepest hole -0.161, 1-sigma level 0.037

Q1 1 0.7046 -0.0237 0.2347 11.00000 0.05 0.71  
 Q2 1 0.6457 0.5041 0.3793 11.00000 0.05 0.19  
 Q3 1 0.6796 0.5924 0.4029 11.00000 0.05 0.18  
 Q4 1 0.5831 0.7626 0.3609 11.00000 0.05 0.18  
 Q5 1 0.6778 0.6766 0.3768 11.00000 0.05 0.15  
 Q6 1 0.7330 0.6696 0.4371 11.00000 0.05 0.15  
 Q7 1 0.5612 0.3487 0.4070 11.00000 0.05 0.14  
 Q8 1 0.6719 0.1350 0.2390 11.00000 0.05 0.14  
 Q9 1 0.3749 0.3814 0.5003 11.00000 0.05 0.13  
 Q10 1 0.6114 0.3161 0.3596 11.00000 0.05 0.13  
 Q11 1 0.6336 0.4031 0.3756 11.00000 0.05 0.13  
 Q12 1 0.8042 0.3966 0.2860 11.00000 0.05 0.13  
 Q13 1 0.7755 0.3850 0.2236 11.00000 0.05 0.13  
 Q14 1 0.5485 0.2421 0.3178 11.00000 0.05 0.12  
 Q15 1 0.4220 0.3692 0.4423 11.00000 0.05 0.12  
 Q16 1 0.4590 0.2078 0.3620 11.00000 0.05 0.12  
 Q17 1 0.1478 0.4531 0.4602 11.00000 0.05 0.12



## CIF S3

|     |   |        |        |        |          |      |      |
|-----|---|--------|--------|--------|----------|------|------|
| Q18 | 1 | 0.4879 | 0.6559 | 0.4175 | 11.00000 | 0.05 | 0.12 |
| Q19 | 1 | 0.4714 | 0.3634 | 0.3656 | 11.00000 | 0.05 | 0.12 |
| Q20 | 1 | 0.6100 | 0.8352 | 0.3904 | 11.00000 | 0.05 | 0.11 |

;

\_shelx\_res\_checksum 78436

\_shelx\_hkl\_file

;

|    |   |   |        |       |
|----|---|---|--------|-------|
| -1 | 0 | 0 | 0.27   | 0.14  |
| 1  | 0 | 0 | 0.16   | 0.20  |
| 1  | 0 | 0 | -0.08  | 0.17  |
| 1  | 0 | 0 | 0.05   | 0.06  |
| -1 | 0 | 0 | 0.36   | 0.16  |
| -1 | 0 | 0 | -0.06  | 0.12  |
| -1 | 0 | 0 | -0.02  | 0.14  |
| 2  | 0 | 0 | 303.91 | 15.41 |
| 2  | 0 | 0 | 326.26 | 15.37 |
| 2  | 0 | 0 | 304.85 | 15.36 |
| -2 | 0 | 0 | 310.76 | 15.35 |
| -2 | 0 | 0 | 305.89 | 15.36 |
| 2  | 0 | 0 | 318.05 | 15.39 |
| -2 | 0 | 0 | 318.23 | 15.29 |
| -2 | 0 | 0 | 330.30 | 15.29 |
| 3  | 0 | 0 | 0.06   | 0.19  |
| 3  | 0 | 0 | -0.12  | 0.22  |
| -3 | 0 | 0 | 0.25   | 0.36  |
| 3  | 0 | 0 | 0.11   | 0.37  |
| 3  | 0 | 0 | 0.20   | 0.53  |
| -3 | 0 | 0 | -0.01  | 0.36  |
| 3  | 0 | 0 | 0.05   | 0.43  |
| -4 | 0 | 0 | 11.34  | 0.79  |
| 4  | 0 | 0 | 11.38  | 0.74  |
| 4  | 0 | 0 | 10.49  | 0.70  |
| 4  | 0 | 0 | 10.50  | 0.99  |
| -4 | 0 | 0 | 11.51  | 0.95  |
| -4 | 0 | 0 | 10.75  | 0.67  |
| 5  | 0 | 0 | -0.16  | 0.37  |
| -5 | 0 | 0 | -0.47  | 0.43  |
| -5 | 0 | 0 | -0.13  | 0.24  |
| -5 | 0 | 0 | -0.46  | 0.43  |
| -6 | 0 | 0 | 7.46   | 0.54  |

## CIF S3

|     |    |   |        |       |
|-----|----|---|--------|-------|
| -6  | 0  | 0 | 6.62   | 0.73  |
| 6   | 0  | 0 | 7.47   | 0.69  |
| -6  | 0  | 0 | 6.73   | 0.57  |
| -7  | 0  | 0 | -0.51  | 0.34  |
| -7  | 0  | 0 | -0.06  | 0.44  |
| 7   | 0  | 0 | -0.52  | 0.42  |
| -7  | 0  | 0 | -0.06  | 0.41  |
| -8  | 0  | 0 | 22.00  | 1.27  |
| -8  | 0  | 0 | 20.78  | 1.26  |
| -9  | 0  | 0 | -0.28  | 0.41  |
| -9  | 0  | 0 | 0.17   | 0.49  |
| -9  | 0  | 0 | -0.09  | 0.57  |
| -9  | 0  | 0 | 0.32   | 0.25  |
| -10 | 0  | 0 | 10.99  | 0.82  |
| -10 | 0  | 0 | 11.83  | 0.94  |
| -10 | 0  | 0 | 10.76  | 0.67  |
| 0   | -1 | 0 | -0.03  | 0.19  |
| 0   | 1  | 0 | -0.04  | 0.06  |
| 0   | 1  | 0 | -0.07  | 0.19  |
| 0   | 1  | 0 | -0.04  | 0.21  |
| 0   | 1  | 0 | 0.08   | 0.17  |
| 0   | -1 | 0 | -0.04  | 0.15  |
| 0   | -1 | 0 | -0.06  | 0.19  |
| -1  | -1 | 0 | 390.35 | 18.30 |
| -1  | -1 | 0 | 383.93 | 18.30 |
| -1  | 1  | 0 | 366.39 | 18.33 |
| -1  | -1 | 0 | 385.18 | 18.37 |
| 1   | 1  | 0 | 376.60 | 18.33 |
| 1   | 1  | 0 | 387.05 | 18.33 |
| -1  | 1  | 0 | 383.54 | 18.37 |
| -1  | 1  | 0 | 372.33 | 18.34 |
| 1   | -1 | 0 | 388.30 | 18.37 |
| 1   | -1 | 0 | 392.36 | 18.38 |
| 1   | -1 | 0 | 345.46 | 18.35 |
| -1  | -1 | 0 | 375.45 | 18.30 |
| -1  | 1  | 0 | 359.21 | 18.34 |
| -1  | 1  | 0 | 365.12 | 18.36 |
| -2  | 1  | 0 | 51.03  | 2.72  |
| 2   | -1 | 0 | 52.50  | 2.78  |
| 2   | 1  | 0 | 54.53  | 2.70  |
| -2  | -1 | 0 | 52.39  | 2.81  |

## CIF S3

|    |    |   |       |      |
|----|----|---|-------|------|
| 2  | -1 | 0 | 49.50 | 2.74 |
| -2 | -1 | 0 | 52.94 | 2.68 |
| 2  | 1  | 0 | 52.26 | 2.64 |
| -2 | 1  | 0 | 51.44 | 2.74 |
| -2 | 1  | 0 | 52.86 | 2.74 |
| -2 | -1 | 0 | 53.06 | 2.66 |
| -2 | 1  | 0 | 47.73 | 2.73 |
| -2 | 1  | 0 | 53.06 | 2.75 |
| 2  | -1 | 0 | 53.91 | 2.80 |
| 2  | 1  | 0 | 52.97 | 2.74 |
| 3  | -1 | 0 | 82.53 | 4.10 |
| -3 | 1  | 0 | 69.83 | 3.88 |
| 3  | 1  | 0 | 77.27 | 3.95 |
| -3 | -1 | 0 | 77.92 | 3.93 |
| 3  | -1 | 0 | 73.18 | 3.82 |
| 3  | -1 | 0 | 78.84 | 3.89 |
| 3  | -1 | 0 | 79.44 | 3.83 |
| -3 | 1  | 0 | 75.45 | 3.99 |
| -3 | 1  | 0 | 80.12 | 3.98 |
| 3  | -1 | 0 | 79.13 | 4.05 |
| -3 | 1  | 0 | 78.42 | 3.90 |
| 3  | 1  | 0 | 74.56 | 3.78 |
| -3 | -1 | 0 | 78.78 | 3.91 |
| 4  | -1 | 0 | 23.71 | 1.86 |
| 4  | 1  | 0 | 28.89 | 1.78 |
| -4 | -1 | 0 | 32.54 | 1.76 |
| 4  | -1 | 0 | 30.42 | 1.64 |
| 4  | -1 | 0 | 31.67 | 1.70 |
| 4  | 1  | 0 | 29.56 | 1.56 |
| -4 | 1  | 0 | 32.42 | 1.85 |
| 4  | 1  | 0 | 30.27 | 1.59 |
| -4 | -1 | 0 | 30.48 | 1.61 |
| -4 | 1  | 0 | 30.37 | 1.68 |
| -4 | -1 | 0 | 31.10 | 1.54 |
| -5 | 1  | 0 | 1.33  | 0.30 |
| -5 | -1 | 0 | 1.32  | 0.46 |
| -5 | -1 | 0 | 1.82  | 0.51 |
| -5 | -1 | 0 | 1.15  | 0.25 |
| -5 | -1 | 0 | 1.29  | 0.27 |
| -5 | 1  | 0 | 1.35  | 0.51 |
| 5  | -1 | 0 | 1.89  | 0.57 |

## CIF S3

|     |    |   |       |      |
|-----|----|---|-------|------|
| 5   | 1  | 0 | 1.48  | 0.44 |
| -5  | 1  | 0 | 0.26  | 0.53 |
| -6  | 1  | 0 | 0.24  | 0.50 |
| -6  | -1 | 0 | -0.04 | 0.26 |
| -6  | -1 | 0 | 0.56  | 0.41 |
| -6  | -1 | 0 | -0.18 | 0.23 |
| -6  | 1  | 0 | -0.03 | 0.30 |
| 6   | -1 | 0 | -0.26 | 0.47 |
| -6  | -1 | 0 | -0.51 | 0.29 |
| -6  | 1  | 0 | -0.48 | 0.35 |
| 6   | 1  | 0 | 0.24  | 0.38 |
| -7  | 1  | 0 | 15.93 | 1.11 |
| -7  | 1  | 0 | 15.18 | 0.96 |
| -7  | -1 | 0 | 14.64 | 0.91 |
| -7  | -1 | 0 | 14.63 | 0.84 |
| -7  | 1  | 0 | 15.61 | 1.02 |
| -7  | -1 | 0 | 13.19 | 0.94 |
| 7   | -1 | 0 | 14.57 | 1.10 |
| -8  | 1  | 0 | 1.66  | 0.46 |
| -8  | -1 | 0 | 1.44  | 0.41 |
| -8  | -1 | 0 | 1.27  | 0.47 |
| -8  | 1  | 0 | 1.68  | 0.53 |
| -9  | -1 | 0 | -0.12 | 0.56 |
| -9  | 1  | 0 | 0.58  | 0.33 |
| -9  | 1  | 0 | 0.34  | 0.36 |
| -9  | 1  | 0 | -0.63 | 0.44 |
| -9  | -1 | 0 | 0.93  | 0.45 |
| -9  | -1 | 0 | -0.16 | 0.59 |
| -9  | 1  | 0 | 0.33  | 0.48 |
| -9  | -1 | 0 | 0.24  | 0.15 |
| -9  | 1  | 0 | 0.33  | 0.57 |
| -9  | 1  | 0 | 0.17  | 0.27 |
| -10 | 1  | 0 | 0.28  | 0.37 |
| -10 | -1 | 0 | 0.65  | 0.28 |
| -10 | -1 | 0 | 0.37  | 0.19 |
| -10 | 1  | 0 | 0.94  | 0.52 |
| -10 | 1  | 0 | 0.71  | 0.26 |
| -10 | -1 | 0 | 0.85  | 0.48 |
| 0   | -2 | 0 | 2.27  | 0.70 |
| 0   | 2  | 0 | 1.87  | 0.62 |
| 0   | 2  | 0 | 2.16  | 0.53 |

## CIF S3

|    |    |   |       |      |
|----|----|---|-------|------|
| 0  | 2  | 0 | 1.52  | 0.49 |
| 0  | 2  | 0 | 1.84  | 0.48 |
| 0  | -2 | 0 | 2.07  | 0.53 |
| 0  | -2 | 0 | 1.67  | 0.39 |
| 0  | -2 | 0 | 1.56  | 0.58 |
| 0  | 2  | 0 | 1.73  | 0.45 |
| -1 | -2 | 0 | 3.90  | 0.58 |
| -1 | -2 | 0 | 2.91  | 0.55 |
| -1 | 2  | 0 | 3.15  | 0.67 |
| 1  | 2  | 0 | 2.96  | 0.66 |
| -1 | 2  | 0 | 2.27  | 0.58 |
| 1  | -2 | 0 | 2.72  | 0.77 |
| 1  | 2  | 0 | 3.25  | 0.56 |
| 1  | 2  | 0 | 3.70  | 0.61 |
| -1 | 2  | 0 | 3.59  | 0.79 |
| -1 | 2  | 0 | 3.72  | 0.67 |
| -1 | -2 | 0 | 3.99  | 0.71 |
| -1 | 2  | 0 | 3.68  | 0.82 |
| -1 | -2 | 0 | 4.06  | 0.69 |
| -1 | -2 | 0 | 3.92  | 0.58 |
| -2 | -2 | 0 | 62.64 | 3.16 |
| 2  | 2  | 0 | 64.32 | 3.22 |
| 2  | 2  | 0 | 62.87 | 3.25 |
| -2 | 2  | 0 | 62.04 | 3.33 |
| -2 | -2 | 0 | 65.22 | 3.32 |
| -2 | 2  | 0 | 60.79 | 3.26 |
| -2 | 2  | 0 | 62.95 | 3.27 |
| -2 | 2  | 0 | 56.16 | 3.23 |
| 2  | -2 | 0 | 62.32 | 3.33 |
| -2 | 2  | 0 | 64.97 | 3.25 |
| -2 | -2 | 0 | 60.37 | 3.16 |
| -2 | 2  | 0 | 55.11 | 3.29 |
| -3 | -2 | 0 | 4.90  | 0.50 |
| -3 | 2  | 0 | 4.40  | 0.84 |
| 3  | -2 | 0 | 6.05  | 0.57 |
| -3 | 2  | 0 | 4.32  | 0.82 |
| -3 | -2 | 0 | 4.43  | 0.64 |
| -3 | -2 | 0 | 4.04  | 0.99 |
| 3  | -2 | 0 | 4.49  | 0.52 |
| 3  | 2  | 0 | 3.81  | 0.66 |
| -3 | -2 | 0 | 3.43  | 0.63 |

## CIF S3

|    |    |   |        |      |
|----|----|---|--------|------|
| 3  | 2  | 0 | 3.72   | 0.39 |
| 3  | -2 | 0 | 4.96   | 0.96 |
| 3  | -2 | 0 | 4.34   | 0.67 |
| -4 | 2  | 0 | 54.11  | 2.79 |
| -4 | 2  | 0 | 55.30  | 2.96 |
| -4 | 2  | 0 | 50.72  | 2.76 |
| -4 | -2 | 0 | 52.17  | 2.62 |
| 4  | -2 | 0 | 53.88  | 3.17 |
| 4  | 2  | 0 | 57.35  | 2.96 |
| -4 | -2 | 0 | 57.40  | 2.85 |
| 4  | -2 | 0 | 54.75  | 2.77 |
| 4  | 2  | 0 | 52.83  | 2.69 |
| 4  | -2 | 0 | 56.88  | 2.84 |
| 4  | 2  | 0 | 51.87  | 2.66 |
| -4 | -2 | 0 | 53.29  | 2.63 |
| -4 | -2 | 0 | 52.77  | 2.63 |
| -4 | -2 | 0 | 52.50  | 2.70 |
| -4 | 2  | 0 | 45.21  | 2.75 |
| -5 | 2  | 0 | 139.02 | 6.88 |
| -5 | -2 | 0 | 144.35 | 6.83 |
| 5  | -2 | 0 | 147.91 | 6.97 |
| -5 | 2  | 0 | 137.14 | 7.18 |
| -5 | -2 | 0 | 137.69 | 6.84 |
| -5 | -2 | 0 | 141.76 | 6.90 |
| -5 | 2  | 0 | 138.41 | 6.87 |
| -5 | -2 | 0 | 136.42 | 6.82 |
| 5  | 2  | 0 | 140.21 | 6.91 |
| -5 | -2 | 0 | 136.01 | 7.05 |
| -6 | 2  | 0 | 13.72  | 1.13 |
| -6 | -2 | 0 | 14.73  | 0.85 |
| 6  | 2  | 0 | 15.28  | 0.96 |
| -6 | -2 | 0 | 13.19  | 0.85 |
| -6 | 2  | 0 | 14.37  | 0.90 |
| -6 | -2 | 0 | 14.62  | 0.92 |
| -6 | 2  | 0 | 13.01  | 0.93 |
| 6  | -2 | 0 | 15.12  | 1.07 |
| 7  | -2 | 0 | 28.15  | 1.81 |
| -7 | 2  | 0 | 29.02  | 1.65 |
| -7 | 2  | 0 | 32.84  | 1.68 |
| -7 | -2 | 0 | 31.22  | 1.62 |
| -7 | 2  | 0 | 29.90  | 1.83 |

## CIF S3

|     |    |   |       |      |
|-----|----|---|-------|------|
| -7  | -2 | 0 | 29.75 | 1.61 |
| -8  | -2 | 0 | 1.02  | 0.41 |
| -8  | 2  | 0 | 0.83  | 0.55 |
| -8  | -2 | 0 | 1.52  | 0.43 |
| -9  | 2  | 0 | 2.34  | 0.52 |
| -9  | 2  | 0 | 2.96  | 0.49 |
| -9  | -2 | 0 | 1.82  | 0.37 |
| -9  | -2 | 0 | 2.55  | 0.53 |
| -9  | -2 | 0 | 2.04  | 0.60 |
| -9  | 2  | 0 | 2.29  | 0.55 |
| -9  | 2  | 0 | 2.82  | 0.51 |
| -9  | 2  | 0 | 2.63  | 0.63 |
| -9  | 2  | 0 | 2.27  | 0.52 |
| -9  | 2  | 0 | 2.37  | 0.58 |
| -10 | -2 | 0 | 5.14  | 0.35 |
| -10 | 2  | 0 | 5.04  | 0.64 |
| -10 | -2 | 0 | 5.03  | 0.38 |
| -10 | 2  | 0 | 5.03  | 0.75 |
| -11 | 2  | 0 | 3.17  | 0.44 |
| 0   | -3 | 0 | -0.46 | 0.74 |
| 0   | -3 | 0 | 0.09  | 0.59 |
| 0   | 3  | 0 | -0.95 | 0.62 |
| 0   | -3 | 0 | -0.28 | 0.52 |
| 0   | 3  | 0 | 0.37  | 0.53 |
| 0   | 3  | 0 | -0.09 | 0.19 |
| 0   | 3  | 0 | -0.32 | 0.68 |
| 0   | 3  | 0 | -0.36 | 0.60 |
| 0   | -3 | 0 | 0.32  | 0.59 |
| -1  | 3  | 0 | 43.65 | 2.54 |
| 1   | 3  | 0 | 43.63 | 2.46 |
| -1  | 3  | 0 | 42.78 | 2.44 |
| 1   | 3  | 0 | 44.91 | 2.38 |
| -1  | -3 | 0 | 42.47 | 2.33 |
| -1  | 3  | 0 | 43.51 | 2.40 |
| -1  | -3 | 0 | 42.40 | 2.45 |
| 1   | -3 | 0 | 37.72 | 2.61 |
| -1  | 3  | 0 | 45.86 | 2.45 |
| -1  | 3  | 0 | 39.28 | 2.52 |
| 1   | -3 | 0 | 37.78 | 2.37 |
| 1   | -3 | 0 | 42.73 | 2.52 |
| -1  | -3 | 0 | 43.29 | 2.32 |

## CIF S3

|    |    |   |        |      |
|----|----|---|--------|------|
| 1  | 3  | 0 | 47.06  | 2.38 |
| -1 | -3 | 0 | 39.34  | 2.32 |
| -1 | -3 | 0 | 40.83  | 2.45 |
| 1  | -3 | 0 | 40.31  | 2.48 |
| -2 | 3  | 0 | 96.85  | 5.56 |
| -2 | 3  | 0 | 115.31 | 5.61 |
| 2  | -3 | 0 | 116.17 | 5.38 |
| -2 | -3 | 0 | 98.48  | 5.40 |
| 2  | 3  | 0 | 107.91 | 5.47 |
| -2 | 3  | 0 | 108.71 | 5.55 |
| -2 | -3 | 0 | 109.87 | 5.40 |
| -2 | 3  | 0 | 110.43 | 5.46 |
| 2  | -3 | 0 | 105.35 | 5.58 |
| 2  | 3  | 0 | 104.94 | 5.52 |
| -2 | -3 | 0 | 103.99 | 5.54 |
| -3 | -3 | 0 | 0.75   | 0.39 |
| 3  | -3 | 0 | 0.73   | 0.55 |
| 3  | 3  | 0 | 1.05   | 0.28 |
| 3  | 3  | 0 | 0.93   | 0.33 |
| -3 | -3 | 0 | 0.81   | 0.78 |
| 3  | -3 | 0 | 0.56   | 0.81 |
| 3  | -3 | 0 | 0.98   | 0.62 |
| -3 | 3  | 0 | 0.73   | 0.58 |
| -3 | -3 | 0 | 0.38   | 0.43 |
| -3 | 3  | 0 | 0.09   | 0.54 |
| 3  | 3  | 0 | 0.95   | 0.51 |
| -4 | 3  | 0 | 71.95  | 3.79 |
| 4  | -3 | 0 | 70.06  | 3.98 |
| -4 | 3  | 0 | 71.70  | 3.72 |
| -4 | -3 | 0 | 69.40  | 3.39 |
| -4 | -3 | 0 | 69.89  | 3.47 |
| -4 | 3  | 0 | 66.01  | 3.46 |
| -4 | -3 | 0 | 71.59  | 3.62 |
| 4  | 3  | 0 | 69.88  | 3.45 |
| 4  | -3 | 0 | 74.16  | 3.61 |
| -4 | -3 | 0 | 66.61  | 3.38 |
| -4 | 3  | 0 | 71.04  | 3.57 |
| 4  | -3 | 0 | 71.33  | 3.55 |
| -4 | -3 | 0 | 64.48  | 3.38 |
| -4 | -3 | 0 | 67.30  | 3.87 |
| -4 | 3  | 0 | 56.05  | 3.67 |



## CIF S3

|    |    |   |       |      |
|----|----|---|-------|------|
| -5 | -3 | 0 | 11.98 | 0.72 |
| -5 | -3 | 0 | 11.08 | 0.66 |
| -5 | 3  | 0 | 12.33 | 0.78 |
| -5 | -3 | 0 | 11.37 | 0.68 |
| 5  | 3  | 0 | 11.77 | 0.80 |
| -5 | -3 | 0 | 10.56 | 0.73 |
| 5  | -3 | 0 | 11.25 | 0.98 |
| 5  | -3 | 0 | 11.88 | 1.08 |
| -5 | 3  | 0 | 10.44 | 1.03 |
| -5 | -3 | 0 | 11.50 | 0.80 |
| -5 | 3  | 0 | 12.02 | 1.29 |
| -6 | 3  | 0 | 1.22  | 0.76 |
| -6 | -3 | 0 | 0.90  | 0.31 |
| -6 | 3  | 0 | 0.26  | 0.44 |
| -6 | -3 | 0 | 1.60  | 0.46 |
| 6  | -3 | 0 | 0.93  | 0.65 |
| -6 | -3 | 0 | 0.37  | 0.33 |
| 6  | 3  | 0 | 0.52  | 0.44 |
| -7 | -3 | 0 | 0.05  | 0.30 |
| -7 | 3  | 0 | 0.72  | 0.71 |
| -7 | 3  | 0 | 0.12  | 0.45 |
| -7 | 3  | 0 | 0.07  | 0.55 |
| -7 | -3 | 0 | 0.01  | 0.36 |
| 7  | -3 | 0 | -0.59 | 0.65 |
| -8 | -3 | 0 | 8.18  | 0.61 |
| -8 | 3  | 0 | 9.48  | 0.89 |
| -8 | -3 | 0 | 9.45  | 0.70 |
| -8 | -3 | 0 | 7.83  | 0.69 |
| -8 | -3 | 0 | 9.21  | 0.90 |
| -8 | 3  | 0 | 7.66  | 1.03 |
| -8 | 3  | 0 | 8.29  | 0.92 |
| -8 | -3 | 0 | 7.26  | 0.99 |
| -8 | 3  | 0 | 7.92  | 1.17 |
| -8 | 3  | 0 | 8.93  | 0.96 |
| -8 | 3  | 0 | 9.05  | 0.82 |
| -9 | -3 | 0 | -0.02 | 0.25 |
| -9 | 3  | 0 | -0.07 | 0.36 |
| -9 | 3  | 0 | -0.35 | 0.33 |
| -9 | 3  | 0 | -0.22 | 0.29 |
| -9 | 3  | 0 | 0.58  | 0.40 |
| -9 | 3  | 0 | 0.00  | 0.52 |

## CIF S3

|     |    |   |        |       |
|-----|----|---|--------|-------|
| -9  | 3  | 0 | 0.01   | 0.53  |
| -9  | 3  | 0 | -0.33  | 0.45  |
| -10 | 3  | 0 | 6.54   | 0.55  |
| -10 | 3  | 0 | 6.18   | 0.63  |
| -10 | -3 | 0 | 6.53   | 0.37  |
| -10 | 3  | 0 | 6.84   | 0.60  |
| -10 | -3 | 0 | 6.45   | 0.35  |
| -10 | 3  | 0 | 6.49   | 0.76  |
| 0   | 4  | 0 | 201.70 | 10.54 |
| 0   | -4 | 0 | 209.30 | 10.56 |
| 0   | -4 | 0 | 215.62 | 10.56 |
| 0   | -4 | 0 | 213.63 | 10.51 |
| 0   | 4  | 0 | 214.90 | 10.63 |
| 0   | 4  | 0 | 208.16 | 10.56 |
| 1   | 4  | 0 | 8.57   | 1.20  |
| 1   | 4  | 0 | 9.63   | 1.03  |
| -1  | -4 | 0 | 9.43   | 1.20  |
| -1  | -4 | 0 | 9.09   | 1.02  |
| 1   | -4 | 0 | 9.66   | 1.26  |
| -1  | -4 | 0 | 8.33   | 1.28  |
| 1   | 4  | 0 | 8.71   | 1.04  |
| -1  | 4  | 0 | 8.63   | 1.23  |
| -1  | 4  | 0 | 9.24   | 1.02  |
| -1  | 4  | 0 | 8.51   | 1.08  |
| 1   | -4 | 0 | 9.12   | 1.20  |
| -1  | -4 | 0 | 8.88   | 1.03  |
| -2  | -4 | 0 | 20.70  | 1.64  |
| 2   | 4  | 0 | 21.82  | 1.51  |
| 2   | 4  | 0 | 19.91  | 1.17  |
| -2  | -4 | 0 | 19.88  | 1.43  |
| 2   | -4 | 0 | 19.69  | 1.35  |
| -2  | 4  | 0 | 22.13  | 1.64  |
| 2   | -4 | 0 | 20.77  | 1.35  |
| 2   | -4 | 0 | 21.22  | 1.72  |
| 2   | -4 | 0 | 21.49  | 1.70  |
| -2  | 4  | 0 | 20.08  | 1.69  |
| 2   | 4  | 0 | 18.97  | 1.60  |
| -3  | -4 | 0 | 0.89   | 0.28  |
| -3  | -4 | 0 | 1.17   | 0.81  |
| -3  | 4  | 0 | 2.03   | 1.04  |
| 3   | 4  | 0 | 1.40   | 0.66  |

## CIF S3

|    |    |   |       |      |
|----|----|---|-------|------|
| 3  | 4  | 0 | 1.62  | 0.45 |
| 3  | -4 | 0 | 1.91  | 0.65 |
| -3 | -4 | 0 | 0.67  | 0.50 |
| -3 | -4 | 0 | 1.78  | 0.51 |
| 3  | -4 | 0 | 1.06  | 0.77 |
| -3 | -4 | 0 | 1.31  | 0.32 |
| 3  | -4 | 0 | 0.56  | 0.90 |
| -4 | 4  | 0 | 50.01 | 2.92 |
| -4 | -4 | 0 | 49.09 | 2.50 |
| 4  | -4 | 0 | 48.35 | 2.62 |
| 4  | -4 | 0 | 49.32 | 2.68 |
| 4  | 4  | 0 | 49.53 | 2.50 |
| -4 | -4 | 0 | 47.61 | 2.39 |
| -4 | -4 | 0 | 49.28 | 2.70 |
| 4  | -4 | 0 | 45.93 | 3.10 |
| -4 | -4 | 0 | 48.20 | 2.40 |
| -4 | 4  | 0 | 44.75 | 2.49 |
| -4 | -4 | 0 | 47.31 | 3.05 |
| -4 | 4  | 0 | 47.34 | 2.51 |
| 5  | -4 | 0 | 3.38  | 0.88 |
| 5  | 4  | 0 | 2.53  | 0.56 |
| -5 | -4 | 0 | 3.29  | 0.50 |
| -5 | 4  | 0 | 2.88  | 0.65 |
| -5 | -4 | 0 | 3.36  | 0.38 |
| 5  | -4 | 0 | 2.96  | 0.78 |
| -5 | -4 | 0 | 2.96  | 0.55 |
| -5 | -4 | 0 | 3.45  | 0.45 |
| -5 | -4 | 0 | 2.96  | 0.39 |
| -6 | -4 | 0 | 3.59  | 0.50 |
| -6 | 4  | 0 | 3.75  | 0.72 |
| -6 | -4 | 0 | 4.18  | 0.57 |
| -6 | 4  | 0 | 4.52  | 1.00 |
| 6  | -4 | 0 | 4.36  | 0.83 |
| -6 | 4  | 0 | 3.06  | 0.71 |
| -6 | -4 | 0 | 4.55  | 0.53 |
| 6  | 4  | 0 | 3.97  | 0.69 |
| -7 | 4  | 0 | 3.95  | 0.91 |
| -7 | -4 | 0 | 3.19  | 0.53 |
| 7  | -4 | 0 | 2.36  | 0.80 |
| -7 | 4  | 0 | 4.12  | 0.75 |
| -7 | -4 | 0 | 2.75  | 0.55 |

## CIF S3

|     |    |   |       |      |
|-----|----|---|-------|------|
| -7  | 4  | 0 | 3.11  | 0.73 |
| -8  | 4  | 0 | 3.79  | 0.77 |
| -8  | 4  | 0 | 3.73  | 0.86 |
| -8  | 4  | 0 | 4.20  | 0.74 |
| -8  | 4  | 0 | 3.58  | 0.82 |
| -8  | -4 | 0 | 3.62  | 0.52 |
| -8  | 4  | 0 | 3.19  | 0.73 |
| -8  | -4 | 0 | 3.35  | 0.56 |
| -8  | 4  | 0 | 3.96  | 0.86 |
| -9  | 4  | 0 | 0.51  | 0.51 |
| -9  | -4 | 0 | 0.09  | 0.23 |
| -9  | 4  | 0 | 0.04  | 0.49 |
| -9  | 4  | 0 | 0.15  | 0.42 |
| -9  | 4  | 0 | 0.64  | 0.39 |
| -9  | 4  | 0 | 0.39  | 0.36 |
| -10 | 4  | 0 | 1.14  | 0.45 |
| -10 | 4  | 0 | 0.69  | 0.29 |
| -10 | 4  | 0 | 0.88  | 0.30 |
| -10 | 4  | 0 | 1.25  | 0.35 |
| -10 | 4  | 0 | 1.33  | 0.28 |
| 0   | -5 | 0 | -0.19 | 0.75 |
| 0   | 5  | 0 | 0.59  | 0.51 |
| 0   | 5  | 0 | 0.46  | 0.89 |
| 0   | -5 | 0 | 0.24  | 0.75 |
| 0   | 5  | 0 | 0.10  | 0.75 |
| 0   | 5  | 0 | -0.08 | 0.22 |
| 0   | 5  | 0 | -0.11 | 0.52 |
| -1  | 5  | 0 | 27.35 | 1.92 |
| 1   | 5  | 0 | 30.50 | 1.96 |
| 1   | 5  | 0 | 26.83 | 1.55 |
| -1  | -5 | 0 | 28.08 | 1.89 |
| 1   | 5  | 0 | 27.14 | 1.54 |
| 1   | -5 | 0 | 30.71 | 2.07 |
| -1  | -5 | 0 | 25.66 | 1.86 |
| 1   | -5 | 0 | 27.37 | 1.98 |
| -1  | 5  | 0 | 26.38 | 2.12 |
| -1  | -5 | 0 | 27.37 | 2.02 |
| 2   | -5 | 0 | 70.61 | 3.62 |
| -2  | -5 | 0 | 64.99 | 3.35 |
| -2  | 5  | 0 | 66.77 | 3.86 |
| 2   | 5  | 0 | 68.51 | 3.44 |

## CIF S3

|    |    |   |       |      |
|----|----|---|-------|------|
| -2 | -5 | 0 | 70.27 | 3.97 |
| -2 | -5 | 0 | 64.69 | 3.67 |
| 2  | -5 | 0 | 69.56 | 3.86 |
| 2  | 5  | 0 | 67.84 | 3.76 |
| 2  | -5 | 0 | 67.09 | 3.92 |
| 2  | 5  | 0 | 64.11 | 3.88 |
| -2 | 5  | 0 | 71.61 | 4.02 |
| -2 | -5 | 0 | 63.70 | 3.48 |
| 2  | -5 | 0 | 67.51 | 3.52 |
| -3 | -5 | 0 | 12.98 | 1.67 |
| 3  | -5 | 0 | 11.86 | 1.53 |
| -3 | 5  | 0 | 9.66  | 0.83 |
| 3  | 5  | 0 | 10.88 | 0.84 |
| -3 | -5 | 0 | 10.74 | 1.15 |
| -3 | -5 | 0 | 11.11 | 0.73 |
| -3 | -5 | 0 | 10.78 | 0.72 |
| 3  | -5 | 0 | 10.61 | 1.09 |
| 3  | 5  | 0 | 12.03 | 1.23 |
| -3 | -5 | 0 | 12.91 | 0.93 |
| 3  | -5 | 0 | 12.29 | 1.08 |
| -3 | 5  | 0 | 10.58 | 1.55 |
| 4  | -5 | 0 | 8.99  | 0.95 |
| -4 | 5  | 0 | 9.57  | 0.79 |
| -4 | -5 | 0 | 10.00 | 0.85 |
| 4  | -5 | 0 | 8.86  | 1.12 |
| 4  | 5  | 0 | 10.17 | 0.82 |
| -4 | -5 | 0 | 9.65  | 1.54 |
| -4 | -5 | 0 | 9.17  | 1.10 |
| 4  | -5 | 0 | 9.48  | 1.57 |
| -4 | 5  | 0 | 9.57  | 0.88 |
| -4 | -5 | 0 | 9.19  | 0.62 |
| -4 | -5 | 0 | 9.75  | 0.66 |
| 5  | 5  | 0 | 5.79  | 0.71 |
| -5 | -5 | 0 | 5.36  | 0.50 |
| -5 | -5 | 0 | 4.92  | 0.55 |
| -5 | -5 | 0 | 5.84  | 0.69 |
| -5 | 5  | 0 | 6.08  | 0.70 |
| 5  | -5 | 0 | 4.55  | 0.92 |
| -5 | 5  | 0 | 5.42  | 0.75 |
| -5 | -5 | 0 | 5.79  | 0.49 |
| 5  | -5 | 0 | 6.22  | 1.06 |

## CIF S3

|     |    |   |       |      |
|-----|----|---|-------|------|
| -5  | -5 | 0 | 4.55  | 0.85 |
| -5  | 5  | 0 | 6.10  | 0.70 |
| -5  | -5 | 0 | 5.08  | 0.62 |
| -6  | 5  | 0 | 6.17  | 0.86 |
| -6  | -5 | 0 | 6.51  | 0.60 |
| -6  | -5 | 0 | 6.63  | 0.41 |
| 6   | 5  | 0 | 5.80  | 0.79 |
| -6  | -5 | 0 | 5.89  | 0.65 |
| -6  | 5  | 0 | 6.31  | 0.81 |
| 6   | -5 | 0 | 5.27  | 0.97 |
| -6  | -5 | 0 | 5.95  | 0.62 |
| -6  | -5 | 0 | 5.57  | 1.07 |
| -7  | 5  | 0 | 0.72  | 0.56 |
| -7  | 5  | 0 | 1.43  | 0.85 |
| -7  | -5 | 0 | 0.60  | 0.41 |
| -7  | -5 | 0 | 0.38  | 0.37 |
| -7  | 5  | 0 | 0.82  | 0.68 |
| 7   | -5 | 0 | 0.53  | 0.78 |
| -8  | 5  | 0 | 0.34  | 0.67 |
| -8  | 5  | 0 | 0.39  | 0.52 |
| -8  | 5  | 0 | 0.44  | 0.49 |
| -8  | 5  | 0 | -0.20 | 0.54 |
| -8  | -5 | 0 | 0.20  | 0.34 |
| -8  | 5  | 0 | -0.16 | 0.53 |
| -8  | 5  | 0 | 0.63  | 0.55 |
| -8  | -5 | 0 | -0.14 | 0.23 |
| -8  | 5  | 0 | -0.05 | 0.48 |
| -9  | 5  | 0 | -0.14 | 0.40 |
| -9  | 5  | 0 | -0.11 | 0.47 |
| -9  | 5  | 0 | 0.34  | 0.41 |
| -9  | 5  | 0 | 0.23  | 0.36 |
| -9  | 5  | 0 | -0.01 | 0.48 |
| -9  | -5 | 0 | 0.30  | 0.24 |
| -10 | 5  | 0 | 8.72  | 0.63 |
| -10 | 5  | 0 | 9.24  | 0.50 |
| -10 | 5  | 0 | 8.82  | 0.64 |
| -10 | 5  | 0 | 8.17  | 0.74 |
| -10 | 5  | 0 | 9.29  | 0.67 |
| 0   | -6 | 0 | 9.51  | 1.42 |
| 0   | -6 | 0 | 8.81  | 0.85 |
| 0   | 6  | 0 | 10.34 | 0.94 |

## CIF S3

|    |    |   |        |      |
|----|----|---|--------|------|
| 0  | -6 | 0 | 10.46  | 0.86 |
| 0  | 6  | 0 | 12.77  | 1.61 |
| 0  | -6 | 0 | 10.67  | 1.44 |
| 0  | 6  | 0 | 10.86  | 0.95 |
| 0  | 6  | 0 | 11.45  | 1.37 |
| -1 | 6  | 0 | 126.42 | 6.66 |
| -1 | -6 | 0 | 116.79 | 6.10 |
| -1 | 6  | 0 | 115.85 | 6.24 |
| 1  | 6  | 0 | 125.25 | 6.20 |
| -1 | -6 | 0 | 122.80 | 6.13 |
| 1  | 6  | 0 | 119.96 | 6.58 |
| -1 | -6 | 0 | 126.68 | 6.67 |
| 1  | -6 | 0 | 120.64 | 6.56 |
| 1  | 6  | 0 | 140.16 | 6.79 |
| 1  | -6 | 0 | 120.32 | 6.15 |
| 1  | -6 | 0 | 130.12 | 6.64 |
| -2 | -6 | 0 | 14.38  | 1.00 |
| 2  | 6  | 0 | 13.35  | 1.44 |
| -2 | -6 | 0 | 15.99  | 1.88 |
| -2 | -6 | 0 | 14.80  | 0.93 |
| -2 | -6 | 0 | 12.58  | 1.36 |
| 2  | -6 | 0 | 13.83  | 1.16 |
| -2 | 6  | 0 | 16.05  | 1.01 |
| 2  | -6 | 0 | 15.74  | 1.68 |
| -2 | 6  | 0 | 17.23  | 1.80 |
| -2 | 6  | 0 | 13.55  | 1.78 |
| 2  | -6 | 0 | 15.29  | 1.68 |
| 2  | 6  | 0 | 15.42  | 1.07 |
| 2  | 6  | 0 | 12.46  | 1.67 |
| 2  | -6 | 0 | 14.01  | 0.98 |
| -3 | -6 | 0 | 39.25  | 2.56 |
| -3 | -6 | 0 | 41.21  | 2.87 |
| 3  | -6 | 0 | 39.05  | 2.86 |
| -3 | -6 | 0 | 44.32  | 2.31 |
| -3 | 6  | 0 | 40.42  | 3.47 |
| -3 | -6 | 0 | 44.82  | 2.15 |
| -3 | -6 | 0 | 39.52  | 2.17 |
| 3  | 6  | 0 | 44.53  | 2.28 |
| 3  | -6 | 0 | 42.37  | 2.47 |
| 3  | -6 | 0 | 44.26  | 2.43 |
| -3 | 6  | 0 | 38.77  | 2.23 |

## CIF S3

|    |    |   |       |      |
|----|----|---|-------|------|
| 4  | -6 | 0 | 6.71  | 1.47 |
| -4 | 6  | 0 | 6.26  | 0.77 |
| -4 | -6 | 0 | 6.84  | 0.58 |
| -4 | -6 | 0 | 6.71  | 0.59 |
| -4 | 6  | 0 | 6.98  | 0.89 |
| -4 | -6 | 0 | 7.51  | 0.84 |
| -4 | 6  | 0 | 6.27  | 1.11 |
| 4  | 6  | 0 | 7.98  | 0.76 |
| -4 | -6 | 0 | 7.13  | 1.58 |
| -4 | -6 | 0 | 6.97  | 0.68 |
| 4  | -6 | 0 | 5.66  | 1.01 |
| -4 | -6 | 0 | 6.84  | 0.92 |
| 4  | -6 | 0 | 5.96  | 1.04 |
| -5 | -6 | 0 | 0.25  | 0.33 |
| -5 | 6  | 0 | 0.39  | 0.53 |
| -5 | -6 | 0 | -0.29 | 0.50 |
| -5 | -6 | 0 | 0.09  | 0.46 |
| -5 | -6 | 0 | 0.90  | 0.68 |
| -5 | 6  | 0 | -0.21 | 0.54 |
| -5 | -6 | 0 | -0.08 | 0.31 |
| 5  | 6  | 0 | 0.35  | 0.59 |
| 5  | -6 | 0 | -0.85 | 0.82 |
| -5 | -6 | 0 | 0.31  | 0.38 |
| -5 | 6  | 0 | 0.15  | 0.80 |
| 5  | -6 | 0 | -0.07 | 0.77 |
| -5 | 6  | 0 | 1.06  | 0.60 |
| -5 | -6 | 0 | -0.01 | 0.74 |
| -6 | -6 | 0 | 3.21  | 0.67 |
| 6  | 6  | 0 | 3.12  | 0.77 |
| -6 | 6  | 0 | 3.61  | 0.81 |
| -6 | -6 | 0 | 3.22  | 0.54 |
| -6 | -6 | 0 | 3.73  | 0.62 |
| -6 | -6 | 0 | 4.06  | 1.01 |
| -6 | 6  | 0 | 4.43  | 0.93 |
| -6 | -6 | 0 | 3.10  | 0.96 |
| 6  | -6 | 0 | 3.76  | 1.00 |
| -6 | -6 | 0 | 3.88  | 0.33 |
| -7 | -6 | 0 | 2.59  | 0.59 |
| -7 | 6  | 0 | 3.47  | 0.77 |
| -7 | -6 | 0 | 2.46  | 0.58 |
| -7 | 6  | 0 | 3.03  | 0.97 |



## CIF S3

|     |    |   |       |      |
|-----|----|---|-------|------|
| -7  | 6  | 0 | 2.73  | 0.78 |
| -8  | 6  | 0 | 0.40  | 0.51 |
| -8  | -6 | 0 | -0.10 | 0.08 |
| -8  | 6  | 0 | 0.15  | 0.65 |
| -8  | 6  | 0 | 0.08  | 0.53 |
| -8  | 6  | 0 | -0.19 | 0.49 |
| -8  | 6  | 0 | 0.60  | 0.52 |
| -8  | 6  | 0 | 0.03  | 0.52 |
| -8  | 6  | 0 | 0.53  | 0.54 |
| -9  | 6  | 0 | 0.75  | 0.37 |
| -9  | 6  | 0 | 0.64  | 0.44 |
| -9  | 6  | 0 | 0.44  | 0.38 |
| -9  | 6  | 0 | 0.23  | 0.43 |
| -9  | -6 | 0 | 0.49  | 0.21 |
| -9  | -6 | 0 | 0.42  | 0.20 |
| -9  | 6  | 0 | 1.44  | 0.48 |
| -9  | -6 | 0 | 0.45  | 0.23 |
| -10 | 6  | 0 | 0.15  | 0.27 |
| -10 | 6  | 0 | -0.21 | 0.33 |
| -10 | 6  | 0 | 0.01  | 0.23 |
| -10 | 6  | 0 | 0.21  | 0.16 |
| -10 | 6  | 0 | -0.02 | 0.28 |
| 0   | 7  | 0 | -0.79 | 0.64 |
| 0   | -7 | 0 | -0.11 | 0.54 |
| 0   | 7  | 0 | 0.28  | 0.48 |
| 0   | 7  | 0 | 0.13  | 0.65 |
| 0   | 7  | 0 | -0.13 | 0.98 |
| 0   | -7 | 0 | -0.29 | 0.88 |
| 0   | 7  | 0 | 0.69  | 0.89 |
| 0   | -7 | 0 | -0.71 | 0.86 |
| -1  | 7  | 0 | 46.37 | 2.98 |
| 1   | -7 | 0 | 43.08 | 2.97 |
| 1   | -7 | 0 | 42.19 | 2.34 |
| -1  | -7 | 0 | 40.57 | 2.24 |
| 1   | 7  | 0 | 45.78 | 3.05 |
| 1   | -7 | 0 | 42.49 | 2.93 |
| -1  | -7 | 0 | 44.45 | 2.98 |
| 1   | 7  | 0 | 43.71 | 2.49 |
| -1  | -7 | 0 | 44.42 | 2.34 |
| -1  | 7  | 0 | 41.72 | 2.32 |
| 1   | 7  | 0 | 44.36 | 2.37 |

## CIF S3

|    |    |   |       |      |
|----|----|---|-------|------|
| -2 | 7  | 0 | 12.19 | 0.90 |
| 2  | 7  | 0 | 9.72  | 1.58 |
| -2 | -7 | 0 | 10.40 | 0.82 |
| 2  | -7 | 0 | 10.74 | 0.99 |
| 2  | 7  | 0 | 10.79 | 0.95 |
| 2  | -7 | 0 | 11.02 | 1.55 |
| -2 | 7  | 0 | 12.11 | 1.70 |
| -2 | -7 | 0 | 9.51  | 0.83 |
| -2 | -7 | 0 | 10.12 | 0.93 |
| -2 | -7 | 0 | 9.26  | 1.60 |
| -3 | -7 | 0 | 7.55  | 0.79 |
| 3  | -7 | 0 | 5.39  | 1.46 |
| -3 | -7 | 0 | 6.90  | 0.66 |
| -3 | -7 | 0 | 6.75  | 0.91 |
| -3 | -7 | 0 | 6.86  | 0.90 |
| 3  | 7  | 0 | 7.56  | 0.87 |
| -3 | -7 | 0 | 7.17  | 1.46 |
| -3 | 7  | 0 | 7.19  | 0.80 |
| 3  | -7 | 0 | 6.72  | 0.96 |
| 4  | -7 | 0 | 3.36  | 1.19 |
| -4 | -7 | 0 | 1.96  | 0.72 |
| -4 | -7 | 0 | 1.48  | 0.72 |
| -4 | -7 | 0 | 2.06  | 0.54 |
| -4 | -7 | 0 | 2.11  | 0.70 |
| -4 | -7 | 0 | 2.60  | 0.57 |
| -4 | 7  | 0 | 1.64  | 0.69 |
| -4 | -7 | 0 | 2.19  | 0.51 |
| 4  | 7  | 0 | 0.62  | 0.62 |
| 4  | -7 | 0 | 1.10  | 0.94 |
| -4 | 7  | 0 | 1.72  | 0.66 |
| -5 | 7  | 0 | 0.53  | 0.62 |
| -5 | -7 | 0 | 0.41  | 0.37 |
| 5  | 7  | 0 | 1.47  | 0.67 |
| 5  | -7 | 0 | 1.78  | 0.96 |
| -5 | -7 | 0 | 1.13  | 0.75 |
| -5 | 7  | 0 | 1.06  | 0.66 |
| -5 | -7 | 0 | 0.55  | 0.62 |
| -5 | 7  | 0 | 1.82  | 0.65 |
| -5 | -7 | 0 | 1.40  | 0.94 |
| -5 | -7 | 0 | 0.54  | 0.36 |
| -5 | -7 | 0 | 1.80  | 0.75 |

## CIF S3

|    |    |   |       |      |
|----|----|---|-------|------|
| -5 | -7 | 0 | 1.19  | 0.47 |
| -5 | -7 | 0 | 1.66  | 0.57 |
| 5  | -7 | 0 | 0.31  | 0.90 |
| 6  | 7  | 0 | 4.00  | 0.87 |
| -6 | 7  | 0 | 4.26  | 0.88 |
| -6 | -7 | 0 | 3.46  | 0.97 |
| -6 | -7 | 0 | 2.84  | 0.55 |
| 6  | -7 | 0 | 2.61  | 1.06 |
| -6 | -7 | 0 | 3.36  | 0.78 |
| -6 | -7 | 0 | 4.42  | 0.74 |
| -6 | -7 | 0 | 3.13  | 0.94 |
| -6 | 7  | 0 | 2.79  | 0.78 |
| -6 | -7 | 0 | 2.98  | 0.68 |
| -7 | 7  | 0 | 36.62 | 2.15 |
| -7 | 7  | 0 | 31.89 | 1.95 |
| -7 | 7  | 0 | 34.00 | 2.00 |
| -7 | -7 | 0 | 36.00 | 1.87 |
| -7 | 7  | 0 | 34.42 | 1.97 |
| -7 | -7 | 0 | 33.58 | 1.88 |
| -7 | -7 | 0 | 32.66 | 1.81 |
| -7 | 7  | 0 | 36.65 | 1.99 |
| -7 | 7  | 0 | 34.13 | 1.97 |
| -7 | 7  | 0 | 35.99 | 2.03 |
| -7 | 7  | 0 | 33.49 | 2.03 |
| -7 | -7 | 0 | 36.39 | 2.14 |
| -8 | 7  | 0 | 0.53  | 0.53 |
| -8 | 7  | 0 | 0.56  | 0.53 |
| -8 | -7 | 0 | 0.64  | 0.33 |
| -8 | 7  | 0 | 1.21  | 0.53 |
| -8 | 7  | 0 | 0.30  | 0.52 |
| -8 | 7  | 0 | 1.44  | 0.54 |
| -8 | 7  | 0 | 0.35  | 0.45 |
| -9 | -7 | 0 | 2.93  | 0.33 |
| -9 | 7  | 0 | 2.84  | 0.45 |
| -9 | 7  | 0 | 3.66  | 0.59 |
| -9 | -7 | 0 | 2.80  | 0.30 |
| -9 | -7 | 0 | 2.64  | 0.27 |
| -9 | 7  | 0 | 2.52  | 0.67 |
| -9 | 7  | 0 | 3.06  | 0.62 |
| -9 | 7  | 0 | 2.67  | 0.69 |
| 0  | -8 | 0 | 0.36  | 0.66 |

## CIF S3

|    |    |   |       |      |
|----|----|---|-------|------|
| 0  | 8  | 0 | 1.55  | 1.08 |
| 0  | 8  | 0 | 0.26  | 0.72 |
| 0  | -8 | 0 | 1.24  | 0.99 |
| -1 | -8 | 0 | 32.22 | 1.84 |
| 1  | -8 | 0 | 26.66 | 2.48 |
| 1  | 8  | 0 | 34.88 | 1.99 |
| -1 | -8 | 0 | 31.84 | 2.74 |
| 1  | 8  | 0 | 31.84 | 2.71 |
| 1  | -8 | 0 | 25.54 | 2.47 |
| 1  | 8  | 0 | 33.90 | 2.03 |
| 1  | -8 | 0 | 35.44 | 1.91 |
| -1 | -8 | 0 | 34.88 | 1.76 |
| -1 | 8  | 0 | 34.02 | 1.86 |
| -1 | -8 | 0 | 33.22 | 1.83 |
| 2  | 8  | 0 | 0.02  | 0.69 |
| -2 | -8 | 0 | 0.04  | 0.57 |
| 2  | -8 | 0 | 0.49  | 0.71 |
| -2 | -8 | 0 | 0.27  | 0.64 |
| 2  | -8 | 0 | 1.29  | 1.06 |
| -2 | -8 | 0 | -0.28 | 0.57 |
| -2 | -8 | 0 | 0.09  | 0.47 |
| -2 | 8  | 0 | -0.57 | 0.62 |
| 2  | 8  | 0 | -0.22 | 1.30 |
| 2  | 8  | 0 | -0.30 | 0.64 |
| -3 | -8 | 0 | 16.85 | 1.09 |
| -3 | -8 | 0 | 16.58 | 1.23 |
| -3 | -8 | 0 | 16.97 | 1.04 |
| 3  | 8  | 0 | 14.62 | 1.22 |
| -3 | 8  | 0 | 14.96 | 1.16 |
| 3  | -8 | 0 | 15.46 | 1.25 |
| -3 | -8 | 0 | 13.46 | 1.19 |
| -4 | -8 | 0 | 8.12  | 0.83 |
| -4 | -8 | 0 | 6.87  | 0.98 |
| 4  | 8  | 0 | 5.68  | 0.95 |
| -4 | -8 | 0 | 8.66  | 0.73 |
| -4 | 8  | 0 | 7.06  | 1.03 |
| 4  | -8 | 0 | 8.22  | 1.24 |
| -4 | -8 | 0 | 7.27  | 1.05 |
| -4 | 8  | 0 | 6.95  | 0.90 |
| -4 | -8 | 0 | 7.34  | 1.17 |
| -4 | -8 | 0 | 6.29  | 0.85 |

## CIF S3

|    |    |   |       |      |
|----|----|---|-------|------|
| -4 | 8  | 0 | 6.36  | 1.02 |
| -5 | -8 | 0 | -0.12 | 0.41 |
| -5 | -8 | 0 | 0.51  | 0.64 |
| 5  | 8  | 0 | 0.43  | 0.70 |
| -5 | -8 | 0 | 0.09  | 0.62 |
| -5 | -8 | 0 | 0.23  | 0.39 |
| -5 | 8  | 0 | 0.44  | 0.66 |
| 5  | -8 | 0 | 1.36  | 1.03 |
| -5 | -8 | 0 | -0.34 | 0.80 |
| -5 | 8  | 0 | 0.93  | 0.62 |
| -5 | 8  | 0 | -0.50 | 0.63 |
| -5 | -8 | 0 | -0.64 | 0.65 |
| -5 | -8 | 0 | 1.12  | 0.93 |
| -5 | -8 | 0 | -0.59 | 0.72 |
| -6 | 8  | 0 | 2.47  | 0.96 |
| -6 | -8 | 0 | 3.73  | 1.00 |
| -6 | -8 | 0 | 3.44  | 0.82 |
| -6 | 8  | 0 | 2.94  | 0.77 |
| -6 | 8  | 0 | 1.84  | 0.63 |
| -6 | 8  | 0 | 2.87  | 0.75 |
| -6 | -8 | 0 | 2.95  | 0.65 |
| -6 | 8  | 0 | 4.61  | 0.93 |
| -6 | -8 | 0 | 4.69  | 0.79 |
| -6 | -8 | 0 | 2.35  | 0.59 |
| -6 | -8 | 0 | 3.42  | 0.81 |
| -6 | 8  | 0 | 3.31  | 0.75 |
| -6 | -8 | 0 | 1.89  | 0.94 |
| -7 | 8  | 0 | 8.16  | 0.92 |
| -7 | 8  | 0 | 6.23  | 0.96 |
| -7 | -8 | 0 | 6.97  | 0.70 |
| -7 | 8  | 0 | 6.93  | 1.01 |
| -7 | 8  | 0 | 7.72  | 0.95 |
| -7 | -8 | 0 | 8.54  | 0.71 |
| -7 | 8  | 0 | 6.48  | 1.21 |
| -7 | -8 | 0 | 5.69  | 1.19 |
| -7 | 8  | 0 | 6.87  | 0.95 |
| -7 | 8  | 0 | 7.28  | 0.94 |
| -7 | -8 | 0 | 6.49  | 0.73 |
| -7 | -8 | 0 | 6.92  | 0.86 |
| -7 | 8  | 0 | 5.96  | 1.25 |
| -8 | 8  | 0 | 0.01  | 0.47 |

## CIF S3

|    |    |   |       |      |
|----|----|---|-------|------|
| -8 | 8  | 0 | 0.10  | 0.48 |
| -8 | 8  | 0 | -0.27 | 0.36 |
| -8 | 8  | 0 | 0.42  | 0.51 |
| -8 | -8 | 0 | -0.44 | 0.29 |
| -8 | 8  | 0 | -0.34 | 0.65 |
| -8 | 8  | 0 | 0.07  | 0.48 |
| -8 | -8 | 0 | -0.09 | 0.39 |
| -8 | 8  | 0 | -0.07 | 0.53 |
| -9 | 8  | 0 | 6.13  | 0.89 |
| -9 | 8  | 0 | 6.39  | 0.60 |
| -9 | 8  | 0 | 4.94  | 0.57 |
| -9 | 8  | 0 | 5.39  | 0.61 |
| -9 | 8  | 0 | 5.40  | 0.61 |
| 0  | -9 | 0 | -0.94 | 0.74 |
| 0  | 9  | 0 | -0.13 | 0.78 |
| 0  | -9 | 0 | -0.16 | 0.60 |
| -1 | -9 | 0 | -0.02 | 0.71 |
| -1 | 9  | 0 | 1.06  | 0.63 |
| 1  | 9  | 0 | 0.18  | 0.74 |
| -1 | -9 | 0 | 0.72  | 0.71 |
| 1  | -9 | 0 | 0.66  | 0.73 |
| 1  | 9  | 0 | 0.01  | 0.76 |
| -1 | -9 | 0 | 0.04  | 0.59 |
| -2 | -9 | 0 | 2.08  | 0.69 |
| -2 | 9  | 0 | 3.47  | 0.85 |
| 2  | -9 | 0 | 4.23  | 0.97 |
| -2 | -9 | 0 | 2.92  | 0.73 |
| 2  | 9  | 0 | 3.37  | 0.98 |
| -2 | -9 | 0 | 3.95  | 0.82 |
| 2  | 9  | 0 | 3.33  | 1.01 |
| -2 | -9 | 0 | 3.65  | 0.87 |
| -2 | -9 | 0 | 3.70  | 0.84 |
| -2 | -9 | 0 | 3.16  | 0.75 |
| -3 | -9 | 0 | -0.49 | 0.71 |
| -3 | -9 | 0 | -0.09 | 0.76 |
| -3 | -9 | 0 | 0.06  | 0.51 |
| 3  | 9  | 0 | 0.73  | 0.80 |
| -3 | 9  | 0 | 0.16  | 0.68 |
| -3 | -9 | 0 | 0.41  | 0.68 |
| -3 | -9 | 0 | 0.08  | 0.68 |
| -3 | -9 | 0 | -0.28 | 0.57 |

## CIF S3

|    |    |   |       |      |
|----|----|---|-------|------|
| 3  | 9  | 0 | -0.23 | 0.76 |
| 3  | -9 | 0 | -0.01 | 0.80 |
| -4 | -9 | 0 | 7.00  | 1.28 |
| -4 | -9 | 0 | 5.29  | 0.88 |
| -4 | -9 | 0 | 5.94  | 1.06 |
| -4 | -9 | 0 | 7.07  | 0.71 |
| -4 | 9  | 0 | 6.07  | 1.08 |
| 4  | 9  | 0 | 4.51  | 0.98 |
| 4  | 9  | 0 | 5.57  | 1.15 |
| -4 | -9 | 0 | 6.90  | 1.10 |
| -4 | -9 | 0 | 6.58  | 0.93 |
| -4 | -9 | 0 | 4.08  | 1.05 |
| -4 | 9  | 0 | 6.57  | 0.97 |
| -4 | 9  | 0 | 6.79  | 0.92 |
| -4 | -9 | 0 | 5.87  | 0.69 |
| -5 | 9  | 0 | 21.95 | 1.56 |
| -5 | -9 | 0 | 24.31 | 1.74 |
| -5 | -9 | 0 | 23.08 | 1.62 |
| -5 | 9  | 0 | 23.39 | 1.55 |
| -5 | -9 | 0 | 23.58 | 1.50 |
| -5 | -9 | 0 | 25.39 | 1.64 |
| -5 | -9 | 0 | 18.02 | 1.42 |
| -5 | 9  | 0 | 24.09 | 1.51 |
| -5 | -9 | 0 | 20.87 | 1.30 |
| -6 | 9  | 0 | 1.66  | 0.67 |
| -6 | -9 | 0 | 1.22  | 0.53 |
| -6 | 9  | 0 | 2.01  | 0.65 |
| -6 | -9 | 0 | 1.84  | 0.64 |
| -6 | 9  | 0 | 1.56  | 0.73 |
| -6 | 9  | 0 | 2.06  | 0.82 |
| -6 | -9 | 0 | 2.42  | 0.96 |
| -6 | -9 | 0 | 3.11  | 0.95 |
| -6 | -9 | 0 | 1.44  | 0.76 |
| -6 | 9  | 0 | 1.46  | 0.57 |
| -6 | -9 | 0 | 1.01  | 0.49 |
| -6 | -9 | 0 | 1.87  | 0.57 |
| -7 | 9  | 0 | 1.04  | 0.62 |
| -7 | -9 | 0 | 1.30  | 0.38 |
| -7 | 9  | 0 | 1.86  | 0.62 |
| -7 | -9 | 0 | 1.72  | 1.20 |
| -7 | 9  | 0 | 0.19  | 0.78 |

## CIF S3

|    |     |   |       |      |
|----|-----|---|-------|------|
| -7 | 9   | 0 | 0.81  | 0.62 |
| -7 | -9  | 0 | 0.73  | 0.35 |
| -7 | 9   | 0 | 0.66  | 0.58 |
| -7 | -9  | 0 | 0.88  | 0.82 |
| -7 | 9   | 0 | 1.52  | 0.58 |
| -7 | 9   | 0 | 1.06  | 0.54 |
| -7 | -9  | 0 | 1.16  | 0.68 |
| 7  | -9  | 0 | 1.02  | 0.98 |
| -7 | -9  | 0 | 0.48  | 0.45 |
| -8 | -9  | 0 | -0.06 | 0.28 |
| -8 | 9   | 0 | -0.48 | 0.54 |
| -8 | 9   | 0 | 0.17  | 0.43 |
| -8 | -9  | 0 | 0.27  | 0.26 |
| -8 | 9   | 0 | 0.18  | 0.57 |
| -8 | 9   | 0 | 0.05  | 0.38 |
| -8 | 9   | 0 | -0.14 | 0.44 |
| -8 | 9   | 0 | -0.66 | 0.37 |
| -8 | 9   | 0 | -0.40 | 0.47 |
| 8  | -9  | 0 | 0.61  | 0.59 |
| 9  | -9  | 0 | 0.05  | 0.41 |
| -9 | 9   | 0 | 0.15  | 0.28 |
| -9 | 9   | 0 | 0.02  | 0.27 |
| -9 | 9   | 0 | 0.62  | 0.36 |
| -9 | 9   | 0 | -0.12 | 0.24 |
| 0  | -10 | 0 | 13.04 | 1.21 |
| 0  | -10 | 0 | 11.83 | 1.11 |
| 1  | -10 | 0 | 30.40 | 1.98 |
| -1 | 10  | 0 | 30.94 | 1.94 |
| -1 | -10 | 0 | 34.06 | 1.84 |
| -1 | -10 | 0 | 30.72 | 1.94 |
| -1 | -10 | 0 | 33.29 | 1.97 |
| -1 | -10 | 0 | 33.16 | 1.98 |
| -1 | -10 | 0 | 30.52 | 1.82 |
| 1  | 10  | 0 | 28.57 | 2.03 |
| -2 | -10 | 0 | -0.13 | 0.78 |
| -2 | 10  | 0 | -0.24 | 0.73 |
| -2 | -10 | 0 | -0.78 | 0.64 |
| -2 | -10 | 0 | 0.65  | 1.01 |
| 2  | -10 | 0 | -0.44 | 0.90 |
| -2 | -10 | 0 | -0.07 | 0.82 |
| 2  | 10  | 0 | -0.60 | 0.87 |



## CIF S3

|    |     |   |       |      |
|----|-----|---|-------|------|
| 2  | 10  | 0 | -0.88 | 0.83 |
| -2 | -10 | 0 | -0.40 | 0.77 |
| -2 | -10 | 0 | 1.12  | 0.68 |
| 3  | -10 | 0 | 0.11  | 0.88 |
| -3 | 10  | 0 | 1.35  | 0.78 |
| -3 | -10 | 0 | 0.89  | 0.83 |
| -3 | -10 | 0 | -0.17 | 0.77 |
| -3 | -10 | 0 | 0.33  | 0.80 |
| -3 | -10 | 0 | 1.02  | 0.66 |
| -3 | -10 | 0 | -0.14 | 0.71 |
| 3  | 10  | 0 | -1.21 | 0.79 |
| -3 | -10 | 0 | 0.63  | 0.64 |
| -4 | -10 | 0 | 13.50 | 1.38 |
| -4 | 10  | 0 | 14.17 | 1.31 |
| -4 | -10 | 0 | 14.95 | 0.88 |
| -4 | -10 | 0 | 13.12 | 1.14 |
| -4 | 10  | 0 | 12.34 | 1.37 |
| -4 | -10 | 0 | 13.95 | 1.49 |
| -4 | -10 | 0 | 17.23 | 1.21 |
| -4 | -10 | 0 | 12.97 | 1.41 |
| -4 | 10  | 0 | 15.10 | 1.29 |
| -5 | -10 | 0 | -0.45 | 0.80 |
| -5 | 10  | 0 | -0.19 | 1.05 |
| -5 | -10 | 0 | 0.57  | 0.64 |
| -5 | -10 | 0 | 0.48  | 0.98 |
| -5 | 10  | 0 | 0.50  | 0.70 |
| -5 | 10  | 0 | 0.90  | 0.80 |
| -5 | -10 | 0 | 0.09  | 0.58 |
| 5  | -10 | 0 | 0.76  | 0.76 |
| -5 | 10  | 0 | -0.93 | 1.03 |
| -5 | -10 | 0 | 0.22  | 0.60 |
| -5 | 10  | 0 | 1.26  | 0.59 |
| -5 | -10 | 0 | 0.35  | 0.67 |
| -5 | -10 | 0 | 0.18  | 0.86 |
| -5 | -10 | 0 | -0.69 | 0.94 |
| -5 | 10  | 0 | 1.12  | 0.46 |
| -5 | 10  | 0 | 0.44  | 0.88 |
| 6  | -10 | 0 | 1.35  | 0.71 |
| -6 | -10 | 0 | 0.78  | 0.96 |
| -6 | 10  | 0 | 1.14  | 0.69 |
| -6 | -10 | 0 | 1.67  | 0.60 |

## CIF S3

|    |     |   |       |      |
|----|-----|---|-------|------|
| -6 | -10 | 0 | 0.72  | 0.45 |
| -6 | -10 | 0 | 0.97  | 0.76 |
| -6 | -10 | 0 | 0.93  | 0.55 |
| -6 | -10 | 0 | 1.90  | 0.48 |
| -6 | -10 | 0 | 1.11  | 0.86 |
| -6 | 10  | 0 | 0.84  | 0.85 |
| -6 | 10  | 0 | 1.07  | 0.62 |
| -6 | 10  | 0 | 2.40  | 0.73 |
| -7 | -10 | 0 | 3.52  | 0.42 |
| -7 | 10  | 0 | 3.49  | 0.98 |
| -7 | -10 | 0 | 3.60  | 0.85 |
| -7 | -10 | 0 | 1.26  | 1.05 |
| -7 | -10 | 0 | 3.14  | 0.53 |
| 7  | -10 | 0 | 2.80  | 0.63 |
| -7 | 10  | 0 | 3.12  | 0.78 |
| -7 | -10 | 0 | 3.10  | 0.65 |
| -7 | 10  | 0 | 2.52  | 0.66 |
| -7 | 10  | 0 | 3.12  | 0.75 |
| -7 | 10  | 0 | 2.45  | 0.57 |
| -8 | -10 | 0 | -0.02 | 0.23 |
| -8 | 10  | 0 | -0.36 | 0.35 |
| -8 | 10  | 0 | -0.07 | 0.31 |
| -8 | 10  | 0 | 0.13  | 0.42 |
| -8 | -10 | 0 | 0.04  | 0.20 |
| 8  | -10 | 0 | -0.27 | 0.45 |
| -8 | 10  | 0 | -0.29 | 0.36 |
| -8 | 10  | 0 | 0.61  | 0.58 |
| 0  | -11 | 0 | 0.43  | 0.88 |
| 0  | -11 | 0 | -0.11 | 0.81 |
| -1 | 11  | 0 | 68.57 | 3.61 |
| -1 | -11 | 0 | 68.12 | 3.59 |
| -1 | -11 | 0 | 71.36 | 3.53 |
| -1 | -11 | 0 | 66.52 | 3.53 |
| 1  | 11  | 0 | 58.51 | 3.77 |
| -1 | -11 | 0 | 65.63 | 3.55 |
| 2  | -11 | 0 | 2.38  | 1.05 |
| -2 | -11 | 0 | 1.36  | 0.78 |
| -2 | -11 | 0 | 0.32  | 0.83 |
| -2 | -11 | 0 | 0.54  | 0.77 |
| -2 | -11 | 0 | 0.59  | 0.74 |
| -2 | 11  | 0 | 1.31  | 0.81 |

## CIF S3

|    |     |   |       |      |
|----|-----|---|-------|------|
| -3 | -11 | 0 | 19.92 | 1.48 |
| -3 | -11 | 0 | 17.31 | 1.39 |
| -3 | -11 | 0 | 16.81 | 1.38 |
| -3 | -11 | 0 | 12.57 | 1.32 |
| -3 | -11 | 0 | 19.86 | 1.48 |
| -3 | -11 | 0 | 18.79 | 1.36 |
| -3 | -11 | 0 | 18.11 | 1.23 |
| -3 | 11  | 0 | 19.22 | 1.52 |
| -3 | -11 | 0 | 17.76 | 1.31 |
| -3 | 11  | 0 | 15.67 | 1.50 |
| 3  | -11 | 0 | 14.95 | 1.52 |
| -3 | -11 | 0 | 18.20 | 1.43 |
| 3  | -11 | 0 | 16.13 | 1.24 |
| 3  | -11 | 0 | 20.52 | 1.64 |
| -4 | -11 | 0 | 1.45  | 0.70 |
| -4 | -11 | 0 | 2.26  | 0.82 |
| -4 | -11 | 0 | 1.03  | 0.68 |
| -4 | 11  | 0 | 0.72  | 1.19 |
| -4 | -11 | 0 | 1.37  | 0.69 |
| -4 | -11 | 0 | -0.05 | 0.87 |
| -4 | -11 | 0 | 0.90  | 0.65 |
| 4  | -11 | 0 | 0.75  | 0.61 |
| -4 | -11 | 0 | -0.22 | 0.71 |
| -4 | -11 | 0 | -0.15 | 0.80 |
| -5 | -11 | 0 | 1.10  | 0.69 |
| -5 | -11 | 0 | -0.17 | 0.85 |
| -5 | 11  | 0 | 0.97  | 0.85 |
| -5 | -11 | 0 | 1.31  | 0.59 |
| -5 | 11  | 0 | 0.80  | 0.70 |
| -5 | 11  | 0 | 0.66  | 0.74 |
| 5  | -11 | 0 | 0.50  | 0.58 |
| -5 | 11  | 0 | 0.86  | 0.41 |
| -5 | -11 | 0 | 2.21  | 0.94 |
| -5 | -11 | 0 | 1.12  | 0.60 |
| -5 | -11 | 0 | 0.47  | 0.78 |
| -5 | -11 | 0 | 1.05  | 0.55 |
| -6 | -11 | 0 | 0.02  | 0.75 |
| -6 | 11  | 0 | 3.97  | 1.03 |
| -6 | 11  | 0 | 3.41  | 0.78 |
| -6 | 11  | 0 | 2.53  | 0.60 |
| -6 | -11 | 0 | 4.17  | 0.70 |

## CIF S3

|    |     |   |       |      |
|----|-----|---|-------|------|
| -6 | -11 | 0 | 3.22  | 0.73 |
| 6  | -11 | 0 | 2.50  | 0.88 |
| -6 | 11  | 0 | 1.90  | 0.66 |
| -6 | -11 | 0 | 1.48  | 0.66 |
| -6 | -11 | 0 | 3.53  | 0.62 |
| -7 | 11  | 0 | 0.84  | 0.79 |
| -7 | 11  | 0 | 0.60  | 0.43 |
| 7  | -11 | 0 | -0.16 | 0.46 |
| -7 | 11  | 0 | -0.26 | 0.60 |
| -7 | -11 | 0 | 0.59  | 0.29 |
| -7 | -11 | 0 | 0.28  | 0.35 |
| 0  | -12 | 0 | 8.51  | 1.22 |
| 0  | -12 | 0 | 6.46  | 1.57 |
| 0  | -12 | 0 | 6.73  | 1.38 |
| 0  | -12 | 0 | 6.04  | 1.15 |
| -1 | -12 | 0 | 0.77  | 0.83 |
| -1 | -12 | 0 | -0.28 | 0.57 |
| -1 | -12 | 0 | 0.38  | 0.83 |
| -1 | 12  | 0 | 1.21  | 0.86 |
| -1 | -12 | 0 | -0.59 | 0.87 |
| 1  | -12 | 0 | 0.12  | 1.04 |
| 1  | -12 | 0 | -1.20 | 0.91 |
| 1  | -12 | 0 | -0.18 | 0.97 |
| -1 | -12 | 0 | -0.95 | 0.81 |
| -1 | -12 | 0 | 0.73  | 1.09 |
| -1 | -12 | 0 | -0.24 | 0.79 |
| 1  | -12 | 0 | 0.20  | 0.45 |
| 2  | -12 | 0 | 1.83  | 1.14 |
| -2 | -12 | 0 | 0.11  | 0.79 |
| -2 | -12 | 0 | 1.96  | 1.10 |
| 2  | -12 | 0 | -0.88 | 1.50 |
| -2 | -12 | 0 | 2.19  | 0.68 |
| -2 | -12 | 0 | 0.07  | 0.76 |
| -2 | -12 | 0 | 0.48  | 0.87 |
| -2 | -12 | 0 | 0.93  | 0.74 |
| -2 | -12 | 0 | 1.76  | 0.81 |
| -3 | -12 | 0 | 18.04 | 1.15 |
| -3 | -12 | 0 | 18.50 | 1.45 |
| -3 | -12 | 0 | 15.11 | 1.35 |
| -3 | -12 | 0 | 16.56 | 1.51 |
| -3 | -12 | 0 | 18.62 | 1.56 |

## CIF S3

|    |     |   |       |      |
|----|-----|---|-------|------|
| -3 | -12 | 0 | 19.95 | 1.38 |
| -3 | -12 | 0 | 20.71 | 1.38 |
| -4 | -12 | 0 | 18.34 | 1.51 |
| -4 | 12  | 0 | 15.81 | 1.60 |
| -4 | -12 | 0 | 19.38 | 1.43 |
| -4 | -12 | 0 | 15.82 | 1.46 |
| -4 | -12 | 0 | 16.60 | 1.26 |
| -4 | -12 | 0 | 17.74 | 1.23 |
| -4 | -12 | 0 | 14.34 | 1.36 |
| -4 | -12 | 0 | 19.76 | 1.27 |
| -5 | -12 | 0 | 11.19 | 1.01 |
| -5 | -12 | 0 | 11.02 | 0.95 |
| -5 | 12  | 0 | 11.16 | 0.71 |
| 5  | -12 | 0 | 9.98  | 0.87 |
| -5 | -12 | 0 | 14.90 | 1.25 |
| -5 | 12  | 0 | 9.97  | 1.45 |
| -5 | 12  | 0 | 10.88 | 1.03 |
| -5 | -12 | 0 | 12.90 | 1.16 |
| -5 | 12  | 0 | 10.22 | 1.29 |
| -6 | -12 | 0 | 2.54  | 0.50 |
| 6  | -12 | 0 | 2.47  | 0.74 |
| -6 | 12  | 0 | 1.90  | 0.53 |
| -6 | 12  | 0 | 1.24  | 0.62 |
| -6 | -12 | 0 | 1.55  | 0.43 |
| -6 | -12 | 0 | 1.88  | 0.57 |
| -7 | 12  | 0 | 2.11  | 0.40 |
| -7 | -12 | 0 | 2.71  | 0.34 |
| -7 | 12  | 0 | 1.29  | 0.46 |
| -7 | 12  | 0 | 1.10  | 0.33 |
| 0  | -13 | 0 | 0.03  | 0.46 |
| 0  | -13 | 0 | -0.23 | 1.02 |
| 0  | -13 | 0 | 0.78  | 0.80 |
| 0  | -13 | 0 | 0.06  | 0.87 |
| 0  | -13 | 0 | -0.90 | 1.01 |
| 1  | -13 | 0 | 0.72  | 0.58 |
| -1 | -13 | 0 | 0.28  | 0.82 |
| -1 | -13 | 0 | 0.45  | 0.96 |
| 1  | -13 | 0 | 1.23  | 1.01 |
| -1 | -13 | 0 | 0.66  | 0.92 |
| -1 | -13 | 0 | -0.21 | 0.78 |
| -1 | -13 | 0 | 1.09  | 0.76 |

## CIF S3

|    |     |   |       |      |
|----|-----|---|-------|------|
| 1  | -13 | 0 | 1.07  | 1.06 |
| -1 | -13 | 0 | 2.30  | 0.86 |
| -1 | -13 | 0 | 0.58  | 0.57 |
| -2 | -13 | 0 | 8.71  | 1.03 |
| -2 | -13 | 0 | 7.93  | 0.94 |
| 2  | -13 | 0 | 7.59  | 1.20 |
| -2 | -13 | 0 | 6.55  | 1.10 |
| -2 | -13 | 0 | 7.11  | 1.55 |
| -2 | -13 | 0 | 7.73  | 1.15 |
| -2 | -13 | 0 | 7.84  | 1.09 |
| -2 | -13 | 0 | 6.74  | 1.14 |
| -2 | -13 | 0 | 7.79  | 1.18 |
| -3 | -13 | 0 | 1.03  | 0.71 |
| -3 | -13 | 0 | 0.79  | 0.68 |
| 3  | -13 | 0 | 1.21  | 1.35 |
| -3 | -13 | 0 | 0.60  | 0.67 |
| -3 | -13 | 0 | 1.79  | 0.76 |
| -3 | -13 | 0 | 1.28  | 0.76 |
| -3 | -13 | 0 | 1.42  | 0.64 |
| -4 | -13 | 0 | 9.21  | 0.91 |
| -4 | -13 | 0 | 13.85 | 0.96 |
| -4 | 13  | 0 | 13.13 | 0.85 |
| -4 | -13 | 0 | 11.84 | 0.99 |
| -4 | 13  | 0 | 12.06 | 1.29 |
| -5 | -13 | 0 | 9.70  | 1.27 |
| -5 | -13 | 0 | 6.92  | 0.75 |
| -5 | 13  | 0 | 8.39  | 1.02 |
| -5 | -13 | 0 | 8.02  | 0.76 |
| -6 | 13  | 0 | -0.65 | 0.50 |
| -6 | 13  | 0 | -0.05 | 0.37 |
| -6 | -13 | 0 | 0.45  | 0.29 |
| -6 | -13 | 0 | 0.47  | 0.26 |
| 0  | -14 | 0 | 6.19  | 1.52 |
| 0  | -14 | 0 | 4.66  | 1.22 |
| 0  | -14 | 0 | 5.43  | 1.09 |
| 0  | -14 | 0 | 4.74  | 1.04 |
| 0  | -14 | 0 | 6.71  | 1.10 |
| 0  | -14 | 0 | 4.50  | 0.98 |
| -1 | -14 | 0 | 1.02  | 0.79 |
| -1 | -14 | 0 | 0.11  | 0.42 |
| -1 | -14 | 0 | 0.33  | 0.64 |

## CIF S3

|    |     |   |       |      |
|----|-----|---|-------|------|
| -1 | -14 | 0 | 1.00  | 0.68 |
| 1  | -14 | 0 | 0.42  | 0.83 |
| -1 | -14 | 0 | 1.09  | 0.81 |
| 1  | -14 | 0 | 0.68  | 0.86 |
| -1 | -14 | 0 | 0.24  | 0.63 |
| -2 | -14 | 0 | 0.20  | 0.61 |
| -2 | -14 | 0 | 0.84  | 0.58 |
| -2 | -14 | 0 | 0.70  | 0.51 |
| 2  | -14 | 0 | 2.13  | 0.84 |
| -2 | -14 | 0 | 0.23  | 0.77 |
| -2 | -14 | 0 | 1.27  | 0.77 |
| -2 | -14 | 0 | 0.02  | 0.65 |
| -2 | -14 | 0 | 0.67  | 0.67 |
| -2 | -14 | 0 | 0.10  | 0.37 |
| -2 | -14 | 0 | 0.69  | 0.60 |
| -3 | -14 | 0 | 2.94  | 0.78 |
| -3 | -14 | 0 | 1.44  | 0.57 |
| 3  | -14 | 0 | 0.79  | 1.11 |
| -3 | -14 | 0 | 4.26  | 0.84 |
| -3 | -14 | 0 | 3.80  | 0.73 |
| -3 | -14 | 0 | 2.79  | 0.65 |
| -4 | -14 | 0 | 7.12  | 0.78 |
| -4 | 14  | 0 | 7.32  | 0.52 |
| -4 | -14 | 0 | 7.30  | 0.73 |
| -4 | -14 | 0 | 8.07  | 1.10 |
| -4 | 14  | 0 | 8.56  | 1.01 |
| -4 | -14 | 0 | 6.93  | 0.75 |
| 0  | -15 | 0 | 0.08  | 0.60 |
| 0  | -15 | 0 | -0.72 | 0.50 |
| 0  | -15 | 0 | -0.32 | 0.59 |
| 0  | -15 | 0 | 0.49  | 0.50 |
| -1 | -15 | 0 | 0.07  | 0.51 |
| -1 | -15 | 0 | 0.28  | 0.56 |
| 1  | -15 | 0 | 0.39  | 0.63 |
| -1 | -15 | 0 | 0.07  | 0.63 |
| 1  | -15 | 0 | -0.24 | 0.62 |
| -2 | -15 | 0 | -0.15 | 0.54 |
| -2 | -15 | 0 | 0.35  | 0.70 |
| -2 | -15 | 0 | 1.74  | 0.72 |
| 2  | -15 | 0 | 1.03  | 0.60 |
| -2 | -15 | 0 | 0.89  | 0.46 |

## CIF S3

|    |     |    |        |       |
|----|-----|----|--------|-------|
| -2 | -15 | 0  | -0.01  | 0.43  |
| 2  | -15 | 0  | 1.02   | 0.53  |
| -2 | -15 | 0  | 0.66   | 0.44  |
| -3 | -15 | 0  | 8.31   | 0.70  |
| -3 | -15 | 0  | 10.04  | 0.86  |
| -3 | -15 | 0  | 6.80   | 0.71  |
| -3 | 15  | 0  | 9.50   | 0.57  |
| -3 | -15 | 0  | 10.38  | 0.84  |
| 0  | 0   | 1  | 0.12   | 0.09  |
| 0  | 0   | -1 | -0.06  | 0.13  |
| 0  | 0   | -1 | -0.05  | 0.11  |
| 0  | 0   | -1 | -0.01  | 0.12  |
| 0  | 0   | 1  | -0.10  | 0.09  |
| -1 | 0   | -1 | 223.45 | 11.04 |
| -1 | 0   | -1 | 211.83 | 11.04 |
| 1  | 0   | 1  | 234.96 | 11.09 |
| -1 | 0   | 1  | 224.93 | 10.96 |
| -1 | 0   | -1 | 232.05 | 11.05 |
| 1  | 0   | 1  | 233.47 | 11.06 |
| 1  | 0   | -1 | 224.57 | 10.97 |
| -1 | 0   | -1 | 213.79 | 11.06 |
| 1  | 0   | 1  | 213.21 | 11.04 |
| -1 | 0   | 1  | 245.43 | 10.97 |
| -1 | 0   | -1 | 225.59 | 11.03 |
| -2 | 0   | -1 | 2.27   | 0.66  |
| -2 | 0   | -1 | 2.58   | 0.67  |
| -2 | 0   | 1  | 2.60   | 0.45  |
| 2  | 0   | -1 | 3.33   | 0.39  |
| -2 | 0   | -1 | 2.13   | 0.57  |
| 2  | 0   | -1 | 3.08   | 0.49  |
| -2 | 0   | -1 | 2.22   | 0.57  |
| 2  | 0   | 1  | 2.07   | 0.58  |
| 2  | 0   | -1 | 1.83   | 0.36  |
| -2 | 0   | 1  | 1.62   | 0.40  |
| 2  | 0   | 1  | 1.98   | 0.57  |
| -2 | 0   | 1  | 2.91   | 0.37  |
| 2  | 0   | 1  | 2.38   | 0.76  |
| 2  | 0   | -1 | 1.41   | 0.29  |
| -2 | 0   | -1 | 2.59   | 0.63  |
| -3 | 0   | -1 | 45.08  | 2.47  |
| -3 | 0   | 1  | 43.51  | 2.36  |



## CIF S3

|    |   |    |       |      |
|----|---|----|-------|------|
| -3 | 0 | -1 | 49.38 | 2.42 |
| 3  | 0 | -1 | 41.49 | 2.37 |
| 3  | 0 | 1  | 44.68 | 2.61 |
| 3  | 0 | -1 | 45.54 | 2.21 |
| 3  | 0 | 1  | 46.70 | 2.52 |
| -3 | 0 | 1  | 46.13 | 2.35 |
| -3 | 0 | -1 | 43.42 | 2.45 |
| -3 | 0 | -1 | 45.28 | 2.40 |
| 3  | 0 | -1 | 45.48 | 2.21 |
| 4  | 0 | -1 | 88.46 | 4.42 |
| 4  | 0 | 1  | 88.97 | 4.72 |
| 4  | 0 | 1  | 89.68 | 4.48 |
| 4  | 0 | -1 | 94.58 | 4.48 |
| -4 | 0 | 1  | 91.47 | 4.56 |
| -4 | 0 | 1  | 86.59 | 4.58 |
| -4 | 0 | -1 | 91.03 | 4.47 |
| -4 | 0 | -1 | 89.94 | 4.58 |
| 4  | 0 | -1 | 89.48 | 4.42 |
| 4  | 0 | -1 | 87.33 | 4.45 |
| -4 | 0 | 1  | 88.83 | 4.46 |
| -4 | 0 | -1 | 90.05 | 4.52 |
| -4 | 0 | -1 | 93.67 | 4.67 |
| 5  | 0 | 1  | 32.27 | 2.35 |
| -5 | 0 | -1 | 37.96 | 2.03 |
| -5 | 0 | 1  | 40.01 | 2.23 |
| 5  | 0 | 1  | 41.49 | 2.13 |
| -5 | 0 | -1 | 40.29 | 2.16 |
| -5 | 0 | -1 | 42.29 | 2.05 |
| -5 | 0 | 1  | 42.24 | 2.09 |
| -5 | 0 | -1 | 41.54 | 2.37 |
| -5 | 0 | 1  | 39.37 | 2.00 |
| 5  | 0 | -1 | 40.32 | 2.08 |
| -6 | 0 | -1 | 5.26  | 0.78 |
| -6 | 0 | -1 | 4.68  | 0.52 |
| -6 | 0 | 1  | 5.00  | 0.51 |
| -6 | 0 | 1  | 5.63  | 0.58 |
| -6 | 0 | 1  | 5.31  | 0.47 |
| 6  | 0 | 1  | 5.17  | 0.69 |
| 6  | 0 | -1 | 5.02  | 0.61 |
| -6 | 0 | -1 | 4.74  | 0.53 |
| -7 | 0 | -1 | 2.20  | 0.48 |

## CIF S3

|     |    |    |        |      |
|-----|----|----|--------|------|
| 7   | 0  | 1  | 1.39   | 0.53 |
| -7  | 0  | 1  | 1.38   | 0.42 |
| -7  | 0  | -1 | 2.07   | 0.43 |
| -7  | 0  | 1  | 1.98   | 0.37 |
| -7  | 0  | -1 | 1.72   | 0.44 |
| -7  | 0  | -1 | 1.57   | 0.55 |
| -8  | 0  | 1  | 4.10   | 0.56 |
| -8  | 0  | -1 | 5.24   | 0.65 |
| -8  | 0  | 1  | 4.93   | 0.64 |
| -8  | 0  | -1 | 4.91   | 0.72 |
| -9  | 0  | -1 | 16.24  | 1.18 |
| -9  | 0  | -1 | 15.66  | 0.98 |
| -9  | 0  | -1 | 15.01  | 1.00 |
| -9  | 0  | -1 | 14.79  | 1.05 |
| -9  | 0  | -1 | 14.48  | 0.92 |
| -9  | 0  | 1  | 14.38  | 1.16 |
| -9  | 0  | 1  | 14.27  | 1.04 |
| -10 | 0  | -1 | 3.25   | 0.61 |
| -10 | 0  | 1  | 3.14   | 0.73 |
| -10 | 0  | 1  | 3.05   | 0.31 |
| -10 | 0  | 1  | 3.02   | 0.35 |
| -10 | 0  | -1 | 2.91   | 0.59 |
| -10 | 0  | 1  | 3.06   | 0.44 |
| -10 | 0  | -1 | 3.54   | 0.71 |
| 0   | 1  | 1  | 70.68  | 3.41 |
| 0   | -1 | 1  | 68.91  | 3.42 |
| 0   | -1 | -1 | 67.80  | 3.41 |
| 0   | 1  | 1  | 74.99  | 3.45 |
| 0   | -1 | -1 | 69.72  | 3.41 |
| 0   | -1 | -1 | 67.63  | 3.42 |
| 0   | 1  | -1 | 62.83  | 3.41 |
| 0   | 1  | 1  | 69.25  | 3.43 |
| 0   | 1  | -1 | 71.49  | 3.41 |
| 0   | 1  | 1  | 67.21  | 3.44 |
| 0   | -1 | 1  | 67.74  | 3.41 |
| 0   | 1  | -1 | 67.92  | 3.40 |
| 0   | -1 | -1 | 67.76  | 3.46 |
| 0   | -1 | 1  | 64.91  | 3.39 |
| -1  | 1  | 1  | 190.96 | 9.13 |
| -1  | 1  | 1  | 179.51 | 9.15 |
| -1  | 1  | 1  | 199.40 | 9.15 |

## CIF S3

|    |    |    |        |      |
|----|----|----|--------|------|
| -1 | -1 | -1 | 184.86 | 9.15 |
| -1 | -1 | -1 | 184.67 | 9.19 |
| -1 | 1  | 1  | 186.18 | 9.13 |
| -1 | -1 | -1 | 188.52 | 9.18 |
| 1  | -1 | 1  | 184.23 | 9.19 |
| 1  | -1 | 1  | 199.37 | 9.22 |
| -1 | -1 | -1 | 187.06 | 9.14 |
| 1  | 1  | -1 | 191.41 | 9.09 |
| -1 | 1  | 1  | 192.24 | 9.16 |
| -1 | -1 | -1 | 199.78 | 9.18 |
| -1 | -1 | -1 | 191.86 | 9.15 |
| 1  | -1 | -1 | 184.49 | 9.15 |
| -1 | 1  | -1 | 188.64 | 9.18 |
| -1 | 1  | -1 | 174.73 | 9.17 |
| 1  | 1  | 1  | 181.70 | 9.18 |
| -1 | 1  | -1 | 181.56 | 9.18 |
| -1 | -1 | 1  | 193.19 | 9.08 |
| -1 | 1  | -1 | 174.70 | 9.15 |
| 1  | 1  | 1  | 177.77 | 9.20 |
| -1 | -1 | 1  | 182.24 | 9.07 |
| -1 | -1 | 1  | 177.94 | 9.14 |
| -2 | 1  | 1  | 150.28 | 7.79 |
| -2 | -1 | -1 | 150.98 | 7.81 |
| -2 | -1 | -1 | 159.67 | 7.80 |
| -2 | -1 | -1 | 160.68 | 7.82 |
| 2  | -1 | 1  | 166.51 | 7.89 |
| 2  | 1  | -1 | 164.26 | 7.71 |
| -2 | -1 | -1 | 149.07 | 7.78 |
| -2 | -1 | -1 | 159.23 | 7.82 |
| -2 | 1  | 1  | 167.16 | 7.74 |
| 2  | -1 | 1  | 164.58 | 7.90 |
| 2  | -1 | 1  | 153.55 | 7.86 |
| -2 | -1 | -1 | 159.12 | 7.87 |
| -2 | 1  | 1  | 151.73 | 7.78 |
| -2 | 1  | 1  | 162.87 | 7.77 |
| -2 | 1  | -1 | 157.77 | 7.84 |
| -2 | 1  | -1 | 152.68 | 7.85 |
| -2 | 1  | -1 | 162.93 | 7.83 |
| 2  | 1  | 1  | 163.19 | 7.86 |
| 2  | -1 | -1 | 157.53 | 7.82 |
| 2  | -1 | -1 | 145.41 | 7.79 |

## CIF S3

|    |    |    |        |      |
|----|----|----|--------|------|
| 2  | -1 | -1 | 141.76 | 7.78 |
| -2 | 1  | -1 | 162.59 | 7.84 |
| -2 | 1  | -1 | 162.58 | 7.90 |
| -2 | -1 | 1  | 164.40 | 7.71 |
| -2 | -1 | 1  | 163.01 | 7.70 |
| -2 | -1 | 1  | 157.33 | 7.82 |
| 2  | 1  | 1  | 150.41 | 7.89 |
| -2 | 1  | -1 | 156.44 | 7.86 |
| 3  | -1 | 1  | 70.55  | 3.63 |
| -3 | -1 | -1 | 74.47  | 3.58 |
| 3  | -1 | 1  | 72.78  | 3.86 |
| 3  | 1  | -1 | 70.06  | 3.59 |
| 3  | -1 | 1  | 70.40  | 3.82 |
| -3 | -1 | -1 | 70.43  | 3.70 |
| -3 | -1 | -1 | 67.83  | 3.71 |
| -3 | -1 | -1 | 76.40  | 3.58 |
| -3 | 1  | 1  | 74.71  | 3.68 |
| -3 | 1  | 1  | 67.23  | 3.69 |
| -3 | 1  | -1 | 73.91  | 3.78 |
| 3  | -1 | -1 | 67.47  | 3.53 |
| -3 | 1  | -1 | 73.76  | 3.75 |
| 3  | -1 | -1 | 71.22  | 3.77 |
| -3 | -1 | 1  | 71.34  | 3.60 |
| -3 | -1 | 1  | 77.31  | 3.60 |
| 3  | -1 | -1 | 70.01  | 3.53 |
| 3  | 1  | 1  | 69.90  | 3.77 |
| 3  | -1 | -1 | 74.29  | 3.60 |
| -3 | 1  | -1 | 76.59  | 3.78 |
| 3  | 1  | 1  | 65.23  | 3.55 |
| 3  | 1  | 1  | 72.43  | 3.88 |
| -4 | -1 | -1 | 40.09  | 2.21 |
| 4  | -1 | 1  | 39.67  | 2.36 |
| -4 | -1 | -1 | 38.74  | 2.04 |
| 4  | -1 | 1  | 40.93  | 2.05 |
| 4  | 1  | -1 | 38.85  | 1.92 |
| -4 | -1 | -1 | 38.37  | 1.95 |
| 4  | -1 | 1  | 41.72  | 2.49 |
| -4 | 1  | 1  | 39.93  | 2.17 |
| 4  | 1  | -1 | 37.52  | 1.96 |
| -4 | 1  | 1  | 38.10  | 2.03 |
| 4  | -1 | -1 | 41.70  | 2.08 |

## CIF S3

|    |    |    |       |      |
|----|----|----|-------|------|
| 4  | -1 | -1 | 38.79 | 2.01 |
| -4 | 1  | -1 | 39.44 | 2.08 |
| -4 | 1  | -1 | 34.30 | 2.07 |
| -4 | -1 | 1  | 33.29 | 2.07 |
| -4 | -1 | 1  | 39.95 | 2.07 |
| -4 | 1  | -1 | 40.15 | 2.27 |
| -4 | 1  | -1 | 38.14 | 2.14 |
| -4 | -1 | 1  | 39.04 | 1.97 |
| 4  | -1 | -1 | 39.89 | 2.01 |
| -4 | 1  | -1 | 36.14 | 2.08 |
| 4  | -1 | -1 | 38.80 | 1.97 |
| -4 | -1 | 1  | 35.42 | 1.97 |
| 4  | 1  | 1  | 39.14 | 2.28 |
| -4 | -1 | 1  | 37.14 | 1.91 |
| 4  | 1  | 1  | 38.99 | 2.02 |
| -5 | 1  | 1  | 49.96 | 2.65 |
| -5 | 1  | 1  | 46.19 | 2.36 |
| -5 | -1 | -1 | 46.45 | 2.66 |
| 5  | -1 | 1  | 47.34 | 2.47 |
| -5 | -1 | -1 | 49.30 | 2.49 |
| 5  | -1 | 1  | 43.46 | 2.82 |
| -5 | 1  | 1  | 49.07 | 2.46 |
| -5 | -1 | -1 | 47.69 | 2.37 |
| 5  | 1  | -1 | 46.25 | 2.39 |
| -5 | -1 | -1 | 45.80 | 2.36 |
| 5  | 1  | -1 | 46.06 | 2.38 |
| -5 | -1 | 1  | 45.44 | 2.33 |
| -5 | 1  | -1 | 48.80 | 2.74 |
| -5 | -1 | 1  | 46.86 | 2.31 |
| 5  | -1 | -1 | 47.50 | 2.45 |
| -5 | -1 | 1  | 46.77 | 2.47 |
| -5 | -1 | 1  | 45.60 | 2.52 |
| -5 | -1 | 1  | 47.44 | 2.38 |
| 5  | -1 | -1 | 48.62 | 2.52 |
| 5  | 1  | 1  | 48.21 | 2.45 |
| -5 | 1  | -1 | 46.60 | 2.52 |
| -5 | 1  | -1 | 43.73 | 2.37 |
| -6 | -1 | -1 | 19.67 | 1.04 |
| -6 | 1  | 1  | 18.03 | 1.09 |
| -6 | -1 | -1 | 18.29 | 1.07 |
| -6 | -1 | -1 | 19.85 | 1.22 |

## CIF S3

|    |    |    |       |      |
|----|----|----|-------|------|
| 6  | -1 | 1  | 19.11 | 1.23 |
| -6 | 1  | 1  | 19.57 | 1.22 |
| -6 | 1  | 1  | 19.23 | 1.05 |
| -6 | -1 | -1 | 18.19 | 1.06 |
| -6 | -1 | 1  | 19.90 | 1.02 |
| -6 | 1  | -1 | 18.39 | 1.29 |
| -6 | 1  | -1 | 19.17 | 1.10 |
| -6 | -1 | 1  | 19.31 | 1.03 |
| -6 | -1 | 1  | 17.73 | 1.03 |
| 6  | -1 | -1 | 18.83 | 1.19 |
| -6 | 1  | -1 | 19.62 | 1.11 |
| -6 | -1 | 1  | 16.87 | 1.02 |
| 6  | 1  | 1  | 18.30 | 1.18 |
| -7 | 1  | 1  | 7.92  | 0.68 |
| -7 | 1  | 1  | 6.82  | 0.64 |
| -7 | -1 | -1 | 7.20  | 0.75 |
| -7 | 1  | 1  | 8.06  | 0.65 |
| -7 | -1 | -1 | 6.81  | 0.64 |
| -7 | -1 | -1 | 7.40  | 0.67 |
| 7  | -1 | 1  | 6.74  | 0.83 |
| -7 | -1 | 1  | 7.68  | 0.64 |
| -7 | -1 | 1  | 8.03  | 0.61 |
| 7  | -1 | -1 | 6.70  | 0.79 |
| -7 | 1  | -1 | 7.71  | 0.78 |
| 7  | 1  | 1  | 6.99  | 0.77 |
| -7 | 1  | -1 | 6.46  | 0.88 |
| -7 | 1  | -1 | 7.78  | 0.69 |
| -8 | 1  | 1  | 21.18 | 1.21 |
| -8 | 1  | 1  | 19.43 | 1.24 |
| -8 | -1 | -1 | 19.17 | 1.21 |
| -8 | -1 | -1 | 20.76 | 1.26 |
| -8 | 1  | -1 | 22.25 | 1.28 |
| -8 | -1 | 1  | 19.99 | 1.18 |
| -8 | -1 | 1  | 20.29 | 1.17 |
| -9 | 1  | 1  | 0.31  | 0.22 |
| -9 | 1  | 1  | 0.04  | 0.44 |
| -9 | -1 | -1 | 0.15  | 0.28 |
| -9 | -1 | -1 | -0.48 | 0.59 |
| -9 | -1 | -1 | 0.25  | 0.47 |
| -9 | 1  | 1  | 0.75  | 0.53 |
| -9 | 1  | 1  | 0.59  | 0.30 |

## CIF S3

|     |    |    |        |       |
|-----|----|----|--------|-------|
| -9  | -1 | -1 | 0.34   | 0.36  |
| -9  | 1  | 1  | 0.32   | 0.44  |
| -9  | -1 | -1 | 0.05   | 0.41  |
| -9  | 1  | -1 | 0.42   | 0.30  |
| -9  | 1  | -1 | 0.79   | 0.58  |
| -9  | 1  | -1 | -0.51  | 0.45  |
| -9  | 1  | -1 | 0.76   | 0.35  |
| -9  | 1  | -1 | 0.29   | 0.33  |
| -9  | -1 | 1  | 0.52   | 0.26  |
| -9  | -1 | 1  | -0.03  | 0.45  |
| -9  | 1  | -1 | 0.90   | 0.40  |
| -9  | 1  | -1 | 0.82   | 0.46  |
| -9  | -1 | 1  | 0.06   | 0.58  |
| -10 | 1  | 1  | 0.38   | 0.36  |
| -10 | 1  | 1  | 0.18   | 0.48  |
| -10 | -1 | -1 | 0.65   | 0.23  |
| -10 | 1  | 1  | 0.56   | 0.22  |
| -10 | 1  | -1 | 1.19   | 0.52  |
| -10 | -1 | 1  | 0.79   | 0.46  |
| -10 | -1 | 1  | 0.58   | 0.15  |
| -10 | -1 | 1  | 1.04   | 0.23  |
| -10 | 1  | -1 | 1.21   | 0.44  |
| 0   | 2  | 1  | 6.85   | 0.83  |
| 0   | 2  | 1  | 6.82   | 0.65  |
| 0   | -2 | 1  | 6.70   | 0.78  |
| 0   | 2  | -1 | 6.54   | 0.66  |
| 0   | -2 | 1  | 5.14   | 0.68  |
| 0   | 2  | -1 | 6.75   | 0.63  |
| 0   | -2 | -1 | 6.71   | 0.74  |
| 0   | 2  | -1 | 6.23   | 0.66  |
| 0   | 2  | 1  | 5.85   | 0.67  |
| 0   | -2 | -1 | 6.07   | 0.71  |
| 0   | -2 | 1  | 5.94   | 0.68  |
| 0   | 2  | 1  | 5.56   | 0.72  |
| 0   | -2 | -1 | 6.53   | 0.77  |
| -1  | 2  | 1  | 332.08 | 15.88 |
| -1  | 2  | 1  | 326.16 | 15.89 |
| -1  | -2 | -1 | 323.93 | 15.81 |
| 1   | 2  | -1 | 311.26 | 15.80 |
| 1   | 2  | -1 | 322.95 | 15.78 |
| -1  | -2 | -1 | 315.47 | 15.87 |

## CIF S3

|    |    |    |        |       |
|----|----|----|--------|-------|
| -1 | -2 | -1 | 338.74 | 15.87 |
| -1 | -2 | -1 | 321.23 | 15.81 |
| 1  | -2 | 1  | 303.54 | 15.83 |
| 1  | -2 | 1  | 302.96 | 15.87 |
| -1 | 2  | 1  | 327.66 | 15.81 |
| -1 | -2 | -1 | 327.76 | 15.83 |
| 1  | 2  | -1 | 310.10 | 15.79 |
| -1 | 2  | 1  | 355.60 | 15.87 |
| 1  | -2 | 1  | 326.74 | 15.90 |
| -1 | -2 | 1  | 305.12 | 15.84 |
| -1 | 2  | -1 | 309.31 | 15.81 |
| -1 | 2  | -1 | 334.32 | 15.89 |
| -1 | -2 | 1  | 322.26 | 15.76 |
| 1  | 2  | 1  | 343.08 | 15.90 |
| -1 | 2  | -1 | 324.59 | 15.87 |
| -1 | -2 | 1  | 347.89 | 15.79 |
| 1  | -2 | -1 | 307.87 | 15.80 |
| 1  | 2  | 1  | 323.25 | 15.86 |
| -1 | 2  | -1 | 301.44 | 15.84 |
| 1  | -2 | -1 | 323.60 | 15.86 |
| -1 | 2  | -1 | 326.82 | 15.92 |
| -1 | -2 | 1  | 335.15 | 15.77 |
| -2 | 2  | 1  | 26.25  | 1.61  |
| -2 | -2 | -1 | 25.50  | 1.56  |
| 2  | -2 | 1  | 25.92  | 1.68  |
| 2  | -2 | 1  | 30.74  | 1.78  |
| -2 | -2 | -1 | 25.12  | 1.80  |
| -2 | -2 | -1 | 25.51  | 1.50  |
| -2 | 2  | 1  | 26.08  | 1.66  |
| 2  | 2  | -1 | 25.35  | 1.50  |
| -2 | -2 | -1 | 24.89  | 1.56  |
| 2  | 2  | -1 | 26.37  | 1.48  |
| -2 | 2  | 1  | 25.40  | 1.64  |
| -2 | 2  | 1  | 27.43  | 1.59  |
| -2 | 2  | 1  | 26.11  | 1.60  |
| -2 | -2 | -1 | 27.76  | 1.59  |
| 2  | 2  | -1 | 27.13  | 1.42  |
| -2 | -2 | -1 | 28.29  | 1.58  |
| 2  | -2 | -1 | 23.76  | 1.73  |
| -2 | 2  | -1 | 28.32  | 1.66  |
| -2 | 2  | -1 | 25.62  | 1.76  |



## CIF S3

|    |    |    |       |      |
|----|----|----|-------|------|
| 2  | 2  | 1  | 26.79 | 1.72 |
| -2 | -2 | 1  | 25.57 | 1.43 |
| -2 | -2 | 1  | 25.76 | 1.65 |
| -2 | -2 | 1  | 26.49 | 1.44 |
| -2 | 2  | -1 | 24.98 | 1.68 |
| 2  | 2  | 1  | 26.70 | 1.63 |
| -2 | 2  | -1 | 24.48 | 1.65 |
| 2  | -2 | -1 | 25.80 | 1.67 |
| -2 | 2  | -1 | 25.43 | 1.65 |
| -2 | 2  | -1 | 30.67 | 2.24 |
| -3 | 2  | 1  | 25.48 | 1.61 |
| -3 | 2  | 1  | 23.81 | 1.54 |
| 3  | -2 | 1  | 26.90 | 1.83 |
| 3  | -2 | 1  | 26.93 | 1.80 |
| 3  | -2 | 1  | 24.11 | 1.49 |
| 3  | 2  | -1 | 27.58 | 1.46 |
| -3 | -2 | -1 | 24.73 | 1.43 |
| 3  | -2 | 1  | 24.70 | 1.53 |
| -3 | -2 | -1 | 25.78 | 1.59 |
| 3  | 2  | -1 | 25.68 | 1.28 |
| -3 | -2 | -1 | 27.05 | 1.77 |
| 3  | -2 | -1 | 27.04 | 1.76 |
| 3  | 2  | 1  | 24.79 | 1.79 |
| 3  | -2 | -1 | 27.05 | 1.46 |
| -3 | 2  | -1 | 28.62 | 1.77 |
| 3  | 2  | 1  | 26.05 | 1.51 |
| -3 | -2 | 1  | 27.60 | 1.45 |
| -3 | -2 | 1  | 26.13 | 1.45 |
| 3  | -2 | -1 | 26.86 | 1.50 |
| -3 | -2 | 1  | 26.58 | 1.71 |
| -3 | 2  | -1 | 24.35 | 1.72 |
| 3  | 2  | 1  | 24.80 | 1.37 |
| -3 | 2  | -1 | 27.09 | 1.70 |
| 3  | 2  | 1  | 27.41 | 1.67 |
| -3 | -2 | 1  | 27.01 | 1.36 |
| 3  | -2 | -1 | 25.99 | 1.39 |
| 4  | -2 | 1  | 12.64 | 0.91 |
| 4  | -2 | 1  | 11.06 | 0.96 |
| -4 | -2 | -1 | 9.83  | 0.67 |
| -4 | -2 | -1 | 11.90 | 0.83 |
| -4 | 2  | 1  | 12.68 | 1.12 |

## CIF S3

|    |    |    |       |      |
|----|----|----|-------|------|
| -4 | -2 | -1 | 11.86 | 1.01 |
| -4 | -2 | -1 | 10.33 | 0.68 |
| 4  | 2  | -1 | 10.87 | 0.67 |
| -4 | 2  | 1  | 11.78 | 0.87 |
| 4  | -2 | 1  | 10.95 | 1.39 |
| 4  | -2 | 1  | 9.56  | 1.27 |
| 4  | 2  | -1 | 11.16 | 0.64 |
| -4 | -2 | 1  | 11.99 | 0.69 |
| 4  | 2  | 1  | 10.73 | 1.07 |
| 4  | -2 | -1 | 12.17 | 0.77 |
| -4 | 2  | -1 | 10.66 | 1.08 |
| -4 | -2 | 1  | 11.90 | 0.85 |
| 4  | -2 | -1 | 12.42 | 0.86 |
| -4 | 2  | -1 | 11.62 | 0.97 |
| -4 | -2 | 1  | 9.46  | 0.85 |
| -4 | 2  | -1 | 11.10 | 1.08 |
| -4 | -2 | 1  | 10.16 | 0.73 |
| 4  | -2 | -1 | 12.05 | 0.93 |
| -4 | -2 | 1  | 10.91 | 0.62 |
| -4 | 2  | -1 | 9.74  | 1.19 |
| -4 | -2 | 1  | 10.53 | 0.60 |
| 4  | 2  | 1  | 10.99 | 0.74 |
| -5 | -2 | -1 | 9.90  | 0.98 |
| -5 | -2 | -1 | 9.65  | 0.64 |
| -5 | -2 | -1 | 9.02  | 0.64 |
| -5 | 2  | 1  | 9.18  | 0.90 |
| -5 | 2  | 1  | 8.09  | 0.70 |
| 5  | -2 | 1  | 10.03 | 0.86 |
| -5 | 2  | 1  | 9.15  | 0.65 |
| -5 | -2 | -1 | 9.85  | 0.78 |
| 5  | 2  | -1 | 9.56  | 0.65 |
| -5 | 2  | 1  | 9.11  | 1.07 |
| -5 | -2 | -1 | 8.75  | 0.64 |
| -5 | -2 | -1 | 9.19  | 0.62 |
| 5  | -2 | -1 | 10.30 | 0.94 |
| -5 | 2  | -1 | 9.73  | 0.68 |
| -5 | -2 | 1  | 9.98  | 0.57 |
| 5  | -2 | -1 | 10.10 | 0.85 |
| -5 | 2  | -1 | 9.22  | 0.93 |
| -5 | 2  | -1 | 8.60  | 0.70 |
| -5 | -2 | 1  | 10.06 | 0.63 |

## CIF S3

|    |    |    |       |      |
|----|----|----|-------|------|
| -5 | -2 | 1  | 8.17  | 0.66 |
| 5  | 2  | 1  | 8.96  | 0.73 |
| -5 | -2 | 1  | 9.49  | 0.78 |
| -5 | 2  | -1 | 9.10  | 1.13 |
| -6 | -2 | -1 | 5.55  | 0.51 |
| -6 | -2 | -1 | 5.25  | 0.55 |
| -6 | 2  | 1  | 5.84  | 0.55 |
| 6  | -2 | 1  | 5.91  | 0.77 |
| -6 | 2  | 1  | 6.60  | 0.84 |
| -6 | -2 | -1 | 5.96  | 0.54 |
| -6 | -2 | -1 | 5.89  | 0.71 |
| -6 | 2  | 1  | 6.48  | 0.59 |
| -6 | -2 | -1 | 6.25  | 0.50 |
| 6  | -2 | -1 | 6.37  | 0.75 |
| -6 | -2 | 1  | 5.46  | 0.49 |
| -6 | 2  | -1 | 5.76  | 0.68 |
| -6 | 2  | -1 | 5.23  | 0.88 |
| -6 | -2 | 1  | 5.83  | 0.47 |
| 6  | 2  | 1  | 5.75  | 0.67 |
| -7 | 2  | 1  | 4.36  | 0.67 |
| -7 | 2  | 1  | 4.02  | 0.57 |
| -7 | 2  | 1  | 3.87  | 0.71 |
| -7 | -2 | -1 | 4.19  | 0.56 |
| 7  | -2 | 1  | 3.48  | 0.81 |
| -7 | -2 | -1 | 4.21  | 0.57 |
| -7 | -2 | -1 | 3.93  | 0.56 |
| -7 | 2  | -1 | 2.61  | 0.59 |
| 7  | 2  | 1  | 3.14  | 0.65 |
| -7 | 2  | -1 | 4.24  | 0.94 |
| -7 | -2 | 1  | 4.10  | 0.48 |
| -7 | -2 | 1  | 3.97  | 0.49 |
| -7 | 2  | -1 | 3.11  | 0.67 |
| 7  | -2 | -1 | 3.35  | 0.73 |
| -8 | 2  | 1  | 9.87  | 0.86 |
| -8 | 2  | 1  | 10.10 | 0.85 |
| -8 | -2 | -1 | 11.08 | 0.80 |
| -8 | -2 | -1 | 10.89 | 0.82 |
| -8 | 2  | -1 | 7.95  | 0.93 |
| -8 | -2 | 1  | 10.29 | 0.98 |
| -8 | -2 | 1  | 10.28 | 0.75 |
| -9 | -2 | -1 | 5.70  | 0.89 |

## CIF S3

|     |    |    |       |      |
|-----|----|----|-------|------|
| -9  | 2  | 1  | 3.92  | 0.70 |
| -9  | -2 | -1 | 4.89  | 0.42 |
| -9  | 2  | 1  | 4.67  | 0.86 |
| -9  | 2  | 1  | 4.87  | 0.62 |
| -9  | -2 | -1 | 5.02  | 0.60 |
| -9  | 2  | 1  | 4.35  | 0.49 |
| -9  | -2 | -1 | 3.73  | 0.73 |
| -9  | 2  | 1  | 4.43  | 0.67 |
| -9  | 2  | 1  | 4.92  | 0.53 |
| -9  | -2 | 1  | 5.17  | 0.88 |
| -9  | 2  | -1 | 5.35  | 0.74 |
| -9  | 2  | -1 | 4.34  | 0.57 |
| -9  | 2  | -1 | 4.64  | 0.84 |
| -9  | 2  | -1 | 6.23  | 0.57 |
| -9  | -2 | 1  | 4.59  | 0.41 |
| -9  | 2  | -1 | 4.67  | 0.61 |
| -9  | 2  | -1 | 4.09  | 0.67 |
| -9  | 2  | -1 | 3.01  | 0.69 |
| -10 | 2  | 1  | 2.85  | 0.40 |
| -10 | 2  | 1  | 3.79  | 0.62 |
| -10 | 2  | 1  | 3.90  | 0.72 |
| -10 | -2 | -1 | 4.21  | 0.38 |
| -10 | 2  | -1 | 4.62  | 0.29 |
| -10 | 2  | -1 | 4.01  | 0.52 |
| -10 | 2  | -1 | 3.68  | 0.61 |
| -10 | 2  | -1 | 4.41  | 0.72 |
| 0   | -3 | -1 | 17.66 | 1.64 |
| 0   | 3  | 1  | 18.50 | 1.38 |
| 0   | -3 | 1  | 18.04 | 1.35 |
| 0   | -3 | -1 | 17.29 | 1.34 |
| 0   | -3 | 1  | 17.57 | 1.39 |
| 0   | -3 | -1 | 20.17 | 1.50 |
| 0   | 3  | -1 | 19.49 | 1.36 |
| 0   | 3  | 1  | 17.23 | 1.52 |
| 0   | 3  | 1  | 18.36 | 1.38 |
| 0   | 3  | -1 | 20.14 | 1.41 |
| 0   | 3  | -1 | 21.52 | 1.38 |
| 0   | 3  | 1  | 22.25 | 1.57 |
| 0   | -3 | -1 | 20.72 | 1.47 |
| 0   | -3 | 1  | 20.75 | 1.46 |
| -1  | -3 | -1 | 99.60 | 5.12 |

## CIF S3

|    |    |    |        |       |
|----|----|----|--------|-------|
| -1 | -3 | -1 | 102.79 | 5.21  |
| 1  | 3  | -1 | 100.92 | 5.09  |
| -1 | 3  | 1  | 94.83  | 5.25  |
| -1 | 3  | 1  | 107.33 | 5.28  |
| 1  | 3  | -1 | 103.39 | 5.16  |
| 1  | -3 | 1  | 105.02 | 5.21  |
| -1 | -3 | -1 | 102.39 | 5.24  |
| -1 | 3  | 1  | 104.37 | 5.20  |
| 1  | -3 | 1  | 90.92  | 5.14  |
| -1 | -3 | -1 | 103.48 | 5.15  |
| 1  | 3  | -1 | 97.71  | 5.11  |
| -1 | 3  | 1  | 105.69 | 5.16  |
| -1 | -3 | -1 | 94.50  | 5.10  |
| -1 | -3 | 1  | 95.72  | 5.07  |
| -1 | 3  | -1 | 107.70 | 5.31  |
| -1 | 3  | -1 | 96.87  | 5.21  |
| -1 | -3 | 1  | 101.28 | 5.07  |
| -1 | -3 | 1  | 99.14  | 5.17  |
| 1  | -3 | -1 | 100.70 | 5.21  |
| -1 | 3  | -1 | 107.29 | 5.17  |
| 1  | 3  | 1  | 101.67 | 5.17  |
| 1  | 3  | 1  | 100.65 | 5.23  |
| -1 | 3  | -1 | 99.29  | 5.18  |
| 1  | -3 | -1 | 92.91  | 5.15  |
| -1 | -3 | 1  | 95.41  | 5.06  |
| -1 | 3  | -1 | 99.53  | 5.13  |
| -2 | -3 | -1 | 212.64 | 10.43 |
| -2 | 3  | 1  | 191.58 | 10.51 |
| -2 | 3  | 1  | 203.92 | 10.56 |
| 2  | 3  | -1 | 204.93 | 10.26 |
| -2 | -3 | -1 | 222.41 | 10.48 |
| 2  | -3 | 1  | 208.43 | 10.39 |
| 2  | 3  | -1 | 218.21 | 10.43 |
| 2  | 3  | -1 | 220.89 | 10.44 |
| -2 | -3 | -1 | 213.41 | 10.60 |
| -2 | 3  | 1  | 226.71 | 10.59 |
| 2  | -3 | 1  | 208.37 | 10.60 |
| -2 | -3 | -1 | 207.14 | 10.45 |
| -2 | 3  | 1  | 215.39 | 10.48 |
| 2  | 3  | -1 | 202.53 | 10.47 |
| -2 | -3 | 1  | 201.19 | 10.39 |

## CIF S3

|    |    |    |        |       |
|----|----|----|--------|-------|
| 2  | -3 | -1 | 230.19 | 10.41 |
| 2  | 3  | 1  | 195.52 | 10.55 |
| -2 | 3  | -1 | 222.58 | 10.55 |
| -2 | -3 | 1  | 206.25 | 10.54 |
| 2  | 3  | 1  | 211.09 | 10.53 |
| -2 | 3  | -1 | 222.55 | 10.63 |
| 2  | -3 | -1 | 210.29 | 10.56 |
| -2 | 3  | -1 | 208.98 | 10.48 |
| -2 | -3 | 1  | 204.84 | 10.39 |
| 2  | -3 | -1 | 203.12 | 10.48 |
| -3 | -3 | -1 | 6.40   | 1.10  |
| -3 | -3 | -1 | 5.82   | 0.90  |
| 3  | -3 | 1  | 6.42   | 1.18  |
| -3 | -3 | -1 | 4.82   | 0.64  |
| 3  | 3  | -1 | 6.87   | 0.51  |
| -3 | 3  | 1  | 6.75   | 0.96  |
| 3  | -3 | 1  | 6.81   | 0.78  |
| 3  | 3  | -1 | 7.02   | 0.74  |
| 3  | -3 | 1  | 6.48   | 0.79  |
| -3 | 3  | 1  | 7.08   | 0.81  |
| 3  | 3  | -1 | 6.05   | 0.45  |
| -3 | 3  | 1  | 4.89   | 0.99  |
| -3 | 3  | -1 | 6.54   | 1.10  |
| 3  | 3  | 1  | 5.70   | 0.55  |
| -3 | 3  | -1 | 7.85   | 1.04  |
| -3 | -3 | 1  | 6.86   | 0.71  |
| -3 | 3  | -1 | 7.52   | 1.08  |
| -3 | -3 | 1  | 7.16   | 1.13  |
| 3  | -3 | -1 | 7.17   | 0.70  |
| 3  | 3  | 1  | 5.74   | 0.90  |
| 3  | -3 | -1 | 5.22   | 1.07  |
| -3 | -3 | 1  | 5.91   | 0.72  |
| -3 | -3 | 1  | 6.72   | 0.57  |
| 3  | -3 | -1 | 6.09   | 0.79  |
| 3  | 3  | 1  | 5.20   | 1.10  |
| -4 | -3 | -1 | 8.97   | 0.62  |
| 4  | -3 | 1  | 9.18   | 1.00  |
| -4 | 3  | 1  | 8.44   | 0.87  |
| 4  | 3  | -1 | 9.93   | 0.66  |
| -4 | 3  | 1  | 11.84  | 0.95  |
| -4 | -3 | -1 | 10.13  | 1.01  |

## CIF S3

|    |    |    |       |      |
|----|----|----|-------|------|
| 4  | -3 | 1  | 9.92  | 1.44 |
| 4  | -3 | 1  | 9.47  | 0.90 |
| -4 | -3 | -1 | 9.18  | 0.64 |
| -4 | -3 | -1 | 9.22  | 0.79 |
| -4 | -3 | -1 | 8.89  | 0.63 |
| -4 | 3  | 1  | 8.21  | 0.84 |
| 4  | 3  | -1 | 9.46  | 0.62 |
| -4 | 3  | 1  | 12.31 | 1.19 |
| -4 | -3 | -1 | 8.56  | 1.40 |
| -4 | -3 | 1  | 9.99  | 0.67 |
| 4  | 3  | 1  | 9.96  | 1.05 |
| -4 | -3 | 1  | 11.62 | 0.87 |
| -4 | 3  | -1 | 6.43  | 1.15 |
| -4 | 3  | -1 | 9.65  | 0.79 |
| -4 | 3  | -1 | 12.43 | 1.55 |
| -4 | -3 | 1  | 10.14 | 0.56 |
| 4  | 3  | 1  | 9.45  | 0.73 |
| 4  | -3 | -1 | 11.41 | 0.99 |
| 4  | -3 | -1 | 11.34 | 1.36 |
| -4 | 3  | -1 | 8.20  | 0.76 |
| 4  | -3 | -1 | 10.70 | 0.88 |
| -4 | 3  | -1 | 10.79 | 1.02 |
| -4 | -3 | 1  | 9.94  | 0.56 |
| -5 | -3 | -1 | 12.07 | 0.80 |
| -5 | -3 | -1 | 12.79 | 0.92 |
| -5 | 3  | 1  | 12.64 | 1.11 |
| -5 | -3 | -1 | 13.44 | 0.78 |
| 5  | -3 | 1  | 13.30 | 1.05 |
| -5 | 3  | 1  | 12.98 | 1.31 |
| -5 | -3 | -1 | 12.19 | 1.45 |
| -5 | 3  | 1  | 12.20 | 0.87 |
| -5 | -3 | -1 | 12.17 | 0.80 |
| -5 | 3  | 1  | 11.88 | 0.82 |
| -5 | -3 | -1 | 12.60 | 0.77 |
| 5  | 3  | -1 | 13.22 | 1.07 |
| -5 | -3 | 1  | 13.81 | 0.78 |
| -5 | -3 | 1  | 12.90 | 0.89 |
| 5  | -3 | -1 | 11.97 | 1.15 |
| -5 | 3  | -1 | 12.69 | 1.11 |
| -5 | 3  | -1 | 13.04 | 0.91 |
| 5  | -3 | -1 | 13.44 | 1.06 |

## CIF S3

|    |    |    |       |      |
|----|----|----|-------|------|
| 5  | 3  | 1  | 13.83 | 0.91 |
| -5 | -3 | 1  | 13.50 | 0.77 |
| -5 | -3 | 1  | 13.06 | 0.75 |
| -5 | -3 | 1  | 13.24 | 0.68 |
| -6 | -3 | -1 | 2.61  | 0.39 |
| -6 | -3 | -1 | 1.73  | 0.39 |
| -6 | 3  | 1  | 2.48  | 0.72 |
| 6  | -3 | 1  | 2.51  | 0.74 |
| -6 | -3 | -1 | 1.58  | 0.35 |
| -6 | -3 | -1 | 2.25  | 0.59 |
| -6 | 3  | 1  | 2.46  | 0.47 |
| -6 | -3 | -1 | 2.15  | 0.40 |
| -6 | 3  | 1  | 1.80  | 0.50 |
| -6 | -3 | 1  | 1.62  | 0.40 |
| 6  | 3  | 1  | 2.41  | 0.59 |
| -6 | 3  | -1 | 0.83  | 0.65 |
| -6 | -3 | 1  | 1.76  | 0.40 |
| -6 | 3  | -1 | 3.27  | 0.60 |
| 6  | -3 | -1 | 1.36  | 0.67 |
| -7 | -3 | -1 | 32.62 | 1.80 |
| -7 | -3 | -1 | 33.61 | 1.76 |
| 7  | -3 | 1  | 34.55 | 2.04 |
| -7 | -3 | -1 | 35.32 | 1.80 |
| -7 | 3  | 1  | 33.78 | 1.87 |
| 7  | 3  | 1  | 28.23 | 1.93 |
| -7 | 3  | -1 | 32.47 | 1.82 |
| -7 | 3  | -1 | 31.72 | 2.10 |
| -7 | -3 | 1  | 34.67 | 1.76 |
| 7  | -3 | -1 | 33.47 | 2.01 |
| -7 | -3 | 1  | 36.39 | 1.75 |
| -7 | 3  | -1 | 35.33 | 1.89 |
| -8 | 3  | 1  | 23.27 | 1.40 |
| -8 | -3 | -1 | 24.45 | 1.54 |
| -8 | 3  | 1  | 23.48 | 1.44 |
| -8 | 3  | 1  | 24.70 | 1.40 |
| -8 | -3 | -1 | 25.56 | 1.36 |
| -8 | -3 | -1 | 22.91 | 1.31 |
| -8 | 3  | 1  | 23.81 | 1.39 |
| -8 | -3 | -1 | 20.37 | 1.38 |
| -8 | 3  | 1  | 25.32 | 1.47 |
| -8 | -3 | -1 | 23.92 | 1.37 |



## CIF S3

|     |    |    |       |      |
|-----|----|----|-------|------|
| -8  | -3 | -1 | 24.49 | 1.38 |
| -8  | 3  | 1  | 26.80 | 1.59 |
| -8  | -3 | 1  | 22.86 | 1.39 |
| -8  | 3  | -1 | 23.81 | 1.45 |
| -8  | 3  | -1 | 24.12 | 1.47 |
| -8  | -3 | 1  | 25.06 | 1.32 |
| -8  | -3 | 1  | 22.61 | 1.46 |
| -8  | 3  | -1 | 24.33 | 1.53 |
| -8  | -3 | 1  | 23.92 | 1.26 |
| -8  | 3  | -1 | 23.50 | 1.45 |
| -8  | 3  | -1 | 24.41 | 1.49 |
| -8  | 3  | -1 | 22.45 | 1.46 |
| -9  | 3  | 1  | 7.20  | 0.76 |
| -9  | 3  | 1  | 7.71  | 0.72 |
| -9  | 3  | 1  | 7.45  | 0.77 |
| -9  | 3  | 1  | 7.01  | 0.67 |
| -9  | 3  | 1  | 8.59  | 0.90 |
| -9  | 3  | 1  | 8.56  | 0.64 |
| -9  | 3  | -1 | 7.02  | 0.84 |
| -9  | -3 | 1  | 7.91  | 0.71 |
| -9  | 3  | -1 | 7.73  | 0.66 |
| -9  | -3 | 1  | 7.60  | 0.51 |
| -9  | 3  | -1 | 7.18  | 0.72 |
| -9  | 3  | -1 | 7.24  | 0.79 |
| -9  | 3  | -1 | 6.85  | 0.91 |
| -9  | 3  | -1 | 7.90  | 0.80 |
| -10 | -3 | -1 | 1.27  | 0.30 |
| -10 | 3  | 1  | 1.07  | 0.27 |
| -10 | 3  | 1  | 0.63  | 0.46 |
| -10 | 3  | 1  | 0.75  | 0.37 |
| -10 | -3 | -1 | 0.90  | 0.25 |
| -10 | 3  | -1 | 0.66  | 0.20 |
| -10 | 3  | -1 | 1.11  | 0.46 |
| -10 | 3  | -1 | 0.23  | 0.30 |
| -10 | 3  | -1 | 0.98  | 0.35 |
| -10 | 3  | -1 | 1.71  | 0.39 |
| 0   | 4  | 1  | 40.24 | 2.39 |
| 0   | 4  | -1 | 34.44 | 2.14 |
| 0   | 4  | -1 | 35.64 | 2.19 |
| 0   | 4  | 1  | 35.40 | 2.26 |
| 0   | -4 | -1 | 34.32 | 2.20 |

## CIF S3

|    |    |    |        |      |
|----|----|----|--------|------|
| 0  | -4 | -1 | 40.94  | 2.30 |
| 0  | -4 | 1  | 32.96  | 2.26 |
| 0  | 4  | -1 | 33.84  | 2.28 |
| 0  | -4 | 1  | 39.65  | 2.20 |
| 0  | 4  | -1 | 33.84  | 1.98 |
| 0  | -4 | -1 | 37.61  | 2.24 |
| 0  | -4 | 1  | 37.31  | 2.20 |
| -1 | -4 | -1 | 159.59 | 8.11 |
| 1  | -4 | 1  | 159.99 | 8.13 |
| -1 | 4  | 1  | 152.73 | 8.09 |
| 1  | 4  | -1 | 166.79 | 8.11 |
| 1  | 4  | -1 | 147.98 | 8.01 |
| -1 | -4 | -1 | 133.32 | 8.06 |
| 1  | 4  | -1 | 162.64 | 8.04 |
| -1 | -4 | -1 | 152.68 | 7.99 |
| 1  | -4 | 1  | 161.86 | 8.12 |
| -1 | -4 | -1 | 162.94 | 8.07 |
| -1 | 4  | 1  | 163.18 | 8.18 |
| -1 | 4  | -1 | 159.00 | 8.09 |
| 1  | -4 | -1 | 161.74 | 8.09 |
| -1 | 4  | -1 | 167.10 | 8.10 |
| 1  | 4  | 1  | 161.11 | 8.09 |
| -1 | 4  | -1 | 162.98 | 8.17 |
| 1  | 4  | 1  | 163.01 | 8.17 |
| -1 | -4 | 1  | 161.14 | 8.09 |
| -1 | -4 | 1  | 168.88 | 8.00 |
| -1 | -4 | 1  | 156.14 | 7.99 |
| 1  | -4 | -1 | 153.04 | 8.01 |
| 2  | 4  | -1 | 80.69  | 4.61 |
| -2 | 4  | 1  | 83.49  | 4.62 |
| 2  | 4  | -1 | 86.08  | 4.54 |
| -2 | -4 | -1 | 84.77  | 4.69 |
| 2  | -4 | 1  | 92.64  | 4.71 |
| -2 | 4  | 1  | 93.58  | 4.74 |
| 2  | 4  | -1 | 96.39  | 4.56 |
| -2 | -4 | -1 | 91.35  | 4.61 |
| -2 | -4 | -1 | 89.49  | 4.55 |
| 2  | -4 | 1  | 88.11  | 4.44 |
| 2  | -4 | 1  | 83.33  | 4.37 |
| 2  | 4  | -1 | 86.34  | 4.30 |
| -2 | 4  | -1 | 90.13  | 4.68 |

## CIF S3

|    |    |    |        |      |
|----|----|----|--------|------|
| 2  | 4  | 1  | 81.84  | 4.32 |
| 2  | 4  | 1  | 71.70  | 4.64 |
| -2 | -4 | 1  | 83.35  | 4.34 |
| -2 | -4 | 1  | 88.86  | 4.48 |
| 2  | 4  | 1  | 89.62  | 4.63 |
| 2  | -4 | -1 | 89.79  | 4.71 |
| -2 | 4  | -1 | 86.11  | 4.42 |
| -2 | -4 | 1  | 89.55  | 4.71 |
| 2  | -4 | -1 | 84.56  | 4.39 |
| 2  | -4 | -1 | 84.54  | 4.44 |
| 2  | -4 | -1 | 87.08  | 4.58 |
| -2 | 4  | -1 | 84.20  | 4.74 |
| -3 | -4 | -1 | 105.22 | 5.52 |
| -3 | 4  | 1  | 116.23 | 6.00 |
| 3  | -4 | 1  | 117.36 | 6.10 |
| 3  | 4  | -1 | 115.40 | 5.80 |
| 3  | -4 | 1  | 106.49 | 5.72 |
| 3  | 4  | -1 | 117.45 | 5.58 |
| 3  | -4 | 1  | 112.27 | 5.67 |
| -3 | -4 | -1 | 107.37 | 5.62 |
| -3 | -4 | -1 | 111.41 | 5.81 |
| -3 | -4 | -1 | 113.91 | 6.04 |
| -3 | -4 | 1  | 114.26 | 5.74 |
| 3  | 4  | 1  | 115.82 | 5.60 |
| -3 | -4 | 1  | 108.76 | 5.51 |
| -3 | 4  | -1 | 124.95 | 6.09 |
| 3  | -4 | -1 | 120.63 | 5.72 |
| -3 | -4 | 1  | 109.75 | 5.52 |
| 3  | 4  | 1  | 113.83 | 5.92 |
| 3  | 4  | 1  | 98.22  | 5.97 |
| -3 | -4 | 1  | 110.33 | 5.58 |
| 3  | -4 | -1 | 116.47 | 6.04 |
| -3 | 4  | -1 | 105.99 | 5.66 |
| -3 | -4 | 1  | 116.71 | 6.01 |
| 3  | -4 | -1 | 115.98 | 5.66 |
| -4 | 4  | 1  | 28.92  | 1.73 |
| -4 | 4  | 1  | 24.89  | 1.49 |
| -4 | -4 | -1 | 26.77  | 2.19 |
| -4 | 4  | 1  | 23.05  | 1.77 |
| -4 | -4 | -1 | 26.43  | 1.39 |
| -4 | -4 | -1 | 25.48  | 1.39 |

## CIF S3

|    |    |    |       |      |
|----|----|----|-------|------|
| 4  | 4  | -1 | 27.86 | 1.46 |
| -4 | -4 | -1 | 28.10 | 1.54 |
| 4  | -4 | 1  | 28.94 | 2.19 |
| -4 | 4  | 1  | 24.81 | 1.47 |
| -4 | -4 | -1 | 24.58 | 1.74 |
| -4 | -4 | -1 | 26.66 | 1.39 |
| 4  | -4 | 1  | 26.04 | 1.59 |
| 4  | -4 | 1  | 25.78 | 1.68 |
| -4 | -4 | 1  | 27.04 | 1.35 |
| -4 | 4  | -1 | 26.20 | 1.51 |
| -4 | -4 | 1  | 29.09 | 1.66 |
| 4  | -4 | -1 | 24.36 | 2.04 |
| 4  | -4 | -1 | 27.82 | 1.73 |
| -4 | -4 | 1  | 26.83 | 1.45 |
| -4 | -4 | 1  | 26.32 | 1.35 |
| 4  | -4 | -1 | 27.03 | 1.62 |
| 4  | 4  | 1  | 25.42 | 1.82 |
| 4  | 4  | 1  | 26.16 | 1.49 |
| -4 | 4  | -1 | 24.63 | 1.46 |
| 5  | 4  | -1 | 56.78 | 2.84 |
| 5  | -4 | 1  | 47.25 | 3.52 |
| -5 | 4  | 1  | 54.73 | 2.81 |
| -5 | -4 | -1 | 55.98 | 2.76 |
| -5 | -4 | -1 | 51.81 | 2.77 |
| -5 | -4 | -1 | 54.76 | 2.78 |
| -5 | 4  | 1  | 55.32 | 3.01 |
| -5 | -4 | -1 | 56.16 | 2.88 |
| -5 | -4 | -1 | 53.88 | 2.74 |
| 5  | -4 | 1  | 54.86 | 2.95 |
| 5  | -4 | -1 | 54.81 | 3.06 |
| -5 | 4  | -1 | 52.73 | 2.83 |
| -5 | 4  | -1 | 51.87 | 2.82 |
| -5 | -4 | 1  | 57.79 | 2.74 |
| -5 | -4 | 1  | 58.58 | 2.70 |
| 5  | 4  | 1  | 55.08 | 2.87 |
| 5  | -4 | -1 | 56.31 | 2.97 |
| -5 | -4 | 1  | 54.99 | 2.75 |
| -5 | -4 | 1  | 58.20 | 2.77 |
| -5 | 4  | -1 | 53.16 | 2.84 |
| -6 | 4  | 1  | 15.59 | 1.13 |
| -6 | -4 | -1 | 17.30 | 0.92 |

## CIF S3

|    |    |    |       |      |
|----|----|----|-------|------|
| -6 | 4  | 1  | 18.88 | 1.06 |
| -6 | -4 | -1 | 15.35 | 1.07 |
| -6 | -4 | -1 | 16.66 | 0.89 |
| -6 | -4 | -1 | 14.48 | 0.99 |
| -6 | -4 | -1 | 15.80 | 1.01 |
| 6  | -4 | 1  | 14.75 | 1.27 |
| -6 | 4  | 1  | 14.15 | 1.31 |
| 6  | -4 | -1 | 14.54 | 1.35 |
| -6 | 4  | -1 | 13.38 | 1.09 |
| -6 | -4 | 1  | 16.44 | 0.95 |
| 6  | -4 | -1 | 16.12 | 1.26 |
| -6 | 4  | -1 | 15.78 | 1.12 |
| -6 | -4 | 1  | 17.30 | 0.93 |
| 6  | 4  | 1  | 16.01 | 1.14 |
| -7 | -4 | -1 | 9.46  | 0.76 |
| -7 | 4  | 1  | 9.76  | 0.84 |
| 7  | -4 | 1  | 9.67  | 1.11 |
| -7 | 4  | 1  | 8.71  | 0.93 |
| -7 | 4  | 1  | 7.59  | 1.11 |
| -7 | -4 | -1 | 10.26 | 0.78 |
| -7 | -4 | 1  | 10.44 | 0.70 |
| -7 | 4  | -1 | 9.68  | 0.92 |
| 7  | -4 | -1 | 9.03  | 1.09 |
| 7  | 4  | 1  | 7.53  | 0.95 |
| -7 | -4 | 1  | 10.23 | 0.69 |
| -7 | 4  | -1 | 9.60  | 0.93 |
| -7 | 4  | -1 | 11.15 | 1.23 |
| -8 | 4  | 1  | 4.83  | 0.82 |
| -8 | 4  | 1  | 3.04  | 0.74 |
| -8 | 4  | 1  | 5.19  | 0.82 |
| -8 | -4 | -1 | 5.73  | 0.56 |
| -8 | 4  | 1  | 4.79  | 0.78 |
| -8 | 4  | 1  | 4.16  | 0.79 |
| -8 | -4 | -1 | 3.61  | 0.96 |
| -8 | 4  | 1  | 3.51  | 0.95 |
| -8 | -4 | -1 | 4.31  | 0.63 |
| -8 | -4 | -1 | 5.28  | 0.60 |
| -8 | 4  | -1 | 5.01  | 0.79 |
| -8 | 4  | -1 | 5.37  | 0.81 |
| -8 | -4 | 1  | 3.90  | 0.45 |
| -8 | 4  | -1 | 4.12  | 0.87 |

## CIF S3

|     |    |    |      |      |
|-----|----|----|------|------|
| -8  | 4  | -1 | 5.27 | 0.67 |
| -8  | -4 | 1  | 4.57 | 0.54 |
| -8  | 4  | -1 | 4.66 | 0.89 |
| -8  | 4  | -1 | 5.17 | 0.78 |
| -8  | 4  | -1 | 4.00 | 0.86 |
| -9  | 4  | 1  | 7.73 | 0.60 |
| -9  | 4  | 1  | 7.47 | 0.68 |
| -9  | 4  | 1  | 7.98 | 0.79 |
| -9  | 4  | 1  | 8.23 | 0.88 |
| -9  | 4  | 1  | 8.06 | 0.75 |
| -9  | 4  | 1  | 7.66 | 0.68 |
| -9  | -4 | -1 | 8.34 | 0.68 |
| -9  | 4  | -1 | 6.72 | 0.73 |
| -9  | 4  | -1 | 6.51 | 0.73 |
| -9  | 4  | -1 | 8.48 | 0.83 |
| -9  | 4  | -1 | 6.61 | 0.83 |
| -9  | -4 | 1  | 7.20 | 0.51 |
| -9  | -4 | 1  | 7.23 | 0.49 |
| -9  | 4  | -1 | 8.16 | 0.79 |
| -10 | 4  | 1  | 6.96 | 0.52 |
| -10 | 4  | 1  | 7.62 | 0.66 |
| -10 | 4  | 1  | 5.48 | 0.62 |
| -10 | 4  | 1  | 6.75 | 0.72 |
| -10 | -4 | -1 | 6.38 | 0.41 |
| -10 | -4 | -1 | 6.80 | 0.40 |
| -10 | 4  | -1 | 6.36 | 0.59 |
| -10 | 4  | -1 | 6.70 | 0.48 |
| -10 | 4  | -1 | 8.13 | 0.62 |
| -10 | 4  | -1 | 6.00 | 0.72 |
| -10 | 4  | -1 | 6.93 | 0.62 |
| 0   | -5 | 1  | 5.03 | 1.12 |
| 0   | 5  | -1 | 3.92 | 1.00 |
| 0   | 5  | -1 | 5.66 | 1.08 |
| 0   | 5  | 1  | 4.98 | 0.70 |
| 0   | 5  | 1  | 4.75 | 1.08 |
| 0   | 5  | 1  | 4.33 | 0.60 |
| 0   | -5 | 1  | 4.78 | 1.05 |
| 0   | -5 | -1 | 4.97 | 1.12 |
| 0   | 5  | -1 | 4.88 | 0.71 |
| 0   | 5  | -1 | 5.07 | 0.68 |
| 0   | 5  | -1 | 5.22 | 1.17 |

## CIF S3

|    |    |    |       |      |
|----|----|----|-------|------|
| 0  | 5  | 1  | 5.06  | 1.22 |
| 0  | -5 | -1 | 5.42  | 1.11 |
| 1  | 5  | -1 | 11.88 | 1.28 |
| -1 | 5  | 1  | 13.73 | 1.43 |
| -1 | -5 | -1 | 13.68 | 1.47 |
| 1  | 5  | -1 | 14.38 | 1.43 |
| 1  | -5 | 1  | 12.01 | 1.43 |
| 1  | 5  | -1 | 13.09 | 0.89 |
| -1 | 5  | 1  | 15.29 | 1.56 |
| -1 | -5 | -1 | 13.19 | 1.31 |
| 1  | -5 | 1  | 14.04 | 1.59 |
| 1  | 5  | -1 | 13.65 | 1.28 |
| -1 | 5  | -1 | 12.71 | 0.99 |
| 1  | -5 | -1 | 11.81 | 1.09 |
| -1 | 5  | -1 | 12.70 | 1.03 |
| 1  | -5 | -1 | 12.71 | 1.31 |
| -1 | 5  | -1 | 14.87 | 1.40 |
| -1 | -5 | 1  | 13.54 | 1.44 |
| -1 | 5  | -1 | 13.75 | 1.55 |
| 1  | -5 | -1 | 12.71 | 1.15 |
| 1  | 5  | 1  | 14.01 | 1.55 |
| 1  | -5 | -1 | 14.58 | 1.46 |
| 1  | 5  | 1  | 13.97 | 1.35 |
| -1 | -5 | 1  | 15.95 | 1.55 |
| 1  | 5  | 1  | 12.97 | 0.93 |
| -1 | -5 | 1  | 13.69 | 1.27 |
| -2 | -5 | -1 | 83.43 | 4.96 |
| 2  | 5  | -1 | 89.99 | 4.92 |
| 2  | -5 | 1  | 90.49 | 4.97 |
| 2  | -5 | 1  | 89.68 | 4.97 |
| 2  | 5  | -1 | 88.95 | 4.50 |
| 2  | -5 | 1  | 85.37 | 4.63 |
| 2  | 5  | -1 | 89.88 | 4.80 |
| -2 | -5 | -1 | 92.05 | 4.97 |
| -2 | -5 | -1 | 86.23 | 4.42 |
| 2  | -5 | 1  | 89.89 | 4.57 |
| -2 | -5 | -1 | 87.15 | 4.78 |
| 2  | 5  | -1 | 87.61 | 4.78 |
| -2 | -5 | -1 | 86.34 | 4.56 |
| -2 | -5 | 1  | 80.39 | 4.40 |
| 2  | -5 | -1 | 95.42 | 4.58 |

## CIF S3

|    |    |    |        |      |
|----|----|----|--------|------|
| 2  | 5  | 1  | 100.97 | 5.02 |
| 2  | -5 | -1 | 95.51  | 4.85 |
| 2  | 5  | 1  | 89.00  | 4.87 |
| -2 | -5 | 1  | 84.48  | 4.52 |
| -2 | 5  | -1 | 86.51  | 4.89 |
| 2  | -5 | -1 | 92.46  | 4.97 |
| -2 | -5 | 1  | 87.24  | 4.73 |
| 2  | 5  | 1  | 89.61  | 4.50 |
| 2  | -5 | -1 | 95.22  | 4.66 |
| -2 | -5 | 1  | 91.94  | 4.94 |
| -2 | 5  | -1 | 93.61  | 5.02 |
| 3  | -5 | 1  | 60.63  | 3.69 |
| -3 | -5 | -1 | 61.86  | 3.74 |
| -3 | 5  | 1  | 59.70  | 3.08 |
| 3  | -5 | 1  | 60.18  | 3.31 |
| 3  | -5 | 1  | 56.99  | 3.19 |
| -3 | -5 | -1 | 57.71  | 3.40 |
| 3  | 5  | -1 | 67.56  | 3.10 |
| 3  | 5  | -1 | 65.00  | 3.42 |
| -3 | -5 | -1 | 58.30  | 3.00 |
| -3 | -5 | -1 | 61.54  | 3.16 |
| -3 | -5 | 1  | 59.54  | 3.00 |
| -3 | -5 | 1  | 61.11  | 3.12 |
| 3  | -5 | -1 | 55.92  | 3.19 |
| 3  | -5 | -1 | 61.89  | 3.66 |
| -3 | -5 | 1  | 62.09  | 3.34 |
| -3 | 5  | -1 | 60.85  | 3.67 |
| -3 | 5  | -1 | 57.84  | 3.09 |
| -3 | -5 | 1  | 62.18  | 3.65 |
| 3  | 5  | 1  | 61.31  | 3.70 |
| 3  | -5 | -1 | 56.09  | 3.27 |
| 3  | 5  | 1  | 62.19  | 3.12 |
| 3  | 5  | 1  | 56.97  | 3.48 |
| -3 | -5 | 1  | 60.02  | 3.01 |
| -3 | 5  | -1 | 59.77  | 3.18 |
| -4 | -5 | -1 | 43.42  | 2.79 |
| -4 | 5  | 1  | 47.80  | 2.54 |
| 4  | -5 | 1  | 45.77  | 2.72 |
| 4  | -5 | 1  | 47.99  | 2.63 |
| -4 | 5  | 1  | 46.06  | 2.47 |
| -4 | -5 | -1 | 47.36  | 3.11 |



## CIF S3

|    |    |    |       |      |
|----|----|----|-------|------|
| 4  | 5  | -1 | 49.69 | 2.50 |
| -4 | -5 | -1 | 49.47 | 2.41 |
| -4 | -5 | -1 | 46.90 | 2.43 |
| -4 | -5 | -1 | 49.83 | 2.41 |
| 4  | -5 | 1  | 44.12 | 3.19 |
| -4 | 5  | 1  | 46.13 | 2.50 |
| -4 | -5 | -1 | 48.91 | 2.57 |
| -4 | -5 | -1 | 47.51 | 2.44 |
| -4 | -5 | 1  | 48.90 | 2.49 |
| -4 | -5 | 1  | 45.52 | 2.69 |
| 4  | -5 | -1 | 46.42 | 3.13 |
| -4 | -5 | 1  | 46.19 | 2.42 |
| -4 | 5  | -1 | 45.82 | 2.50 |
| 4  | -5 | -1 | 47.99 | 2.62 |
| -4 | -5 | 1  | 48.45 | 2.38 |
| 4  | -5 | -1 | 50.93 | 2.78 |
| -4 | -5 | 1  | 48.69 | 2.38 |
| 4  | 5  | 1  | 50.11 | 2.54 |
| -4 | 5  | -1 | 46.44 | 2.56 |
| -5 | -5 | -1 | 2.87  | 0.48 |
| 5  | 5  | -1 | 2.40  | 0.60 |
| -5 | -5 | -1 | 2.62  | 0.78 |
| -5 | 5  | 1  | 3.47  | 0.65 |
| -5 | -5 | -1 | 3.20  | 0.56 |
| 5  | -5 | 1  | 3.62  | 0.90 |
| -5 | -5 | -1 | 2.76  | 0.71 |
| -5 | -5 | -1 | 2.49  | 0.48 |
| -5 | -5 | -1 | 2.62  | 0.53 |
| -5 | 5  | -1 | 4.29  | 0.74 |
| -5 | 5  | -1 | 2.43  | 0.68 |
| -5 | -5 | 1  | 2.90  | 0.35 |
| -5 | -5 | 1  | 2.46  | 0.51 |
| 5  | -5 | -1 | 2.59  | 0.82 |
| -5 | -5 | 1  | 3.27  | 0.89 |
| 5  | -5 | -1 | 2.87  | 0.99 |
| -5 | 5  | -1 | 2.46  | 0.71 |
| -5 | -5 | 1  | 3.34  | 0.48 |
| -5 | -5 | 1  | 2.95  | 0.52 |
| 5  | 5  | 1  | 3.30  | 0.70 |
| -6 | -5 | -1 | 3.99  | 0.82 |
| -6 | -5 | -1 | 4.27  | 0.95 |

## CIF S3

|    |    |    |       |      |
|----|----|----|-------|------|
| -6 | -5 | -1 | 4.03  | 0.46 |
| -6 | 5  | 1  | 5.02  | 0.83 |
| -6 | -5 | -1 | 3.91  | 0.56 |
| -6 | -5 | -1 | 3.44  | 0.47 |
| -6 | 5  | 1  | 2.88  | 0.72 |
| -6 | 5  | 1  | 1.34  | 0.84 |
| -6 | -5 | -1 | 3.48  | 0.66 |
| 6  | -5 | 1  | 4.33  | 0.97 |
| -6 | -5 | -1 | 4.20  | 0.65 |
| 6  | -5 | -1 | 4.85  | 0.93 |
| -6 | -5 | 1  | 4.21  | 0.54 |
| -6 | 5  | -1 | 3.65  | 0.82 |
| -6 | -5 | 1  | 5.98  | 1.46 |
| 6  | -5 | -1 | 3.87  | 1.03 |
| 6  | 5  | 1  | 4.02  | 0.78 |
| -6 | -5 | 1  | 3.15  | 0.56 |
| -6 | 5  | -1 | 4.69  | 0.82 |
| 7  | -5 | 1  | 0.02  | 0.76 |
| -7 | -5 | -1 | 0.24  | 0.39 |
| -7 | -5 | -1 | -0.80 | 0.43 |
| -7 | 5  | 1  | 1.67  | 0.69 |
| -7 | 5  | 1  | 0.34  | 0.84 |
| -7 | 5  | 1  | -0.12 | 0.54 |
| -7 | -5 | 1  | -0.06 | 0.35 |
| -7 | 5  | -1 | -0.50 | 0.66 |
| 7  | -5 | -1 | -0.42 | 0.79 |
| 7  | 5  | 1  | 0.18  | 0.89 |
| -7 | -5 | 1  | 0.06  | 0.33 |
| -7 | 5  | -1 | -0.34 | 0.57 |
| -8 | 5  | 1  | 0.60  | 0.64 |
| -8 | 5  | 1  | 0.26  | 0.51 |
| -8 | 5  | 1  | 1.48  | 0.48 |
| -8 | 5  | 1  | 0.98  | 0.54 |
| -8 | 5  | 1  | 1.48  | 0.51 |
| -8 | -5 | -1 | 0.49  | 0.63 |
| -8 | 5  | 1  | 1.54  | 0.46 |
| -8 | -5 | -1 | 0.88  | 0.41 |
| -8 | -5 | 1  | 0.93  | 0.27 |
| -8 | 5  | -1 | 1.30  | 0.53 |
| -8 | 5  | -1 | 0.95  | 0.54 |
| -8 | 5  | -1 | 0.73  | 0.52 |

## CIF S3

|     |    |    |      |      |
|-----|----|----|------|------|
| -8  | 5  | -1 | 1.39 | 0.69 |
| -8  | 5  | -1 | 1.84 | 0.58 |
| -8  | 5  | -1 | 0.96 | 0.51 |
| -8  | 5  | -1 | 0.09 | 0.55 |
| -9  | 5  | 1  | 2.82 | 0.58 |
| -9  | 5  | 1  | 2.87 | 0.50 |
| -9  | 5  | 1  | 3.66 | 0.70 |
| -9  | -5 | -1 | 2.85 | 0.40 |
| -9  | 5  | 1  | 2.78 | 0.65 |
| -9  | 5  | 1  | 3.47 | 0.78 |
| -9  | -5 | 1  | 2.84 | 0.31 |
| -9  | 5  | -1 | 3.65 | 0.72 |
| -9  | -5 | 1  | 3.03 | 0.33 |
| -9  | 5  | -1 | 3.10 | 0.65 |
| -9  | 5  | -1 | 3.15 | 0.71 |
| -9  | 5  | -1 | 2.36 | 0.79 |
| -9  | -5 | 1  | 2.28 | 0.28 |
| -9  | 5  | -1 | 2.16 | 0.50 |
| -10 | 5  | 1  | 0.05 | 0.24 |
| -10 | 5  | 1  | 0.32 | 0.27 |
| -10 | 5  | 1  | 0.10 | 0.36 |
| -10 | 5  | -1 | 0.58 | 0.39 |
| -10 | 5  | -1 | 0.06 | 0.23 |
| -10 | 5  | -1 | 0.52 | 0.37 |
| -10 | 5  | -1 | 0.28 | 0.31 |
| -10 | 5  | -1 | 0.68 | 0.33 |
| 0   | 6  | 1  | 5.45 | 0.69 |
| 0   | -6 | -1 | 5.03 | 1.22 |
| 0   | -6 | 1  | 4.06 | 0.69 |
| 0   | -6 | 1  | 5.69 | 1.24 |
| 0   | 6  | 1  | 4.01 | 1.17 |
| 0   | 6  | -1 | 4.57 | 1.12 |
| 0   | -6 | 1  | 4.82 | 0.58 |
| 0   | 6  | 1  | 6.24 | 1.37 |
| 0   | 6  | -1 | 5.63 | 0.70 |
| 0   | 6  | -1 | 5.05 | 1.12 |
| 0   | 6  | 1  | 4.35 | 0.77 |
| 0   | -6 | -1 | 5.87 | 1.28 |
| 0   | 6  | -1 | 5.17 | 1.31 |
| 0   | 6  | -1 | 4.97 | 0.80 |
| 0   | -6 | 1  | 5.30 | 1.41 |

## CIF S3

|    |    |    |        |      |
|----|----|----|--------|------|
| -1 | -6 | -1 | 116.14 | 6.09 |
| 1  | 6  | -1 | 106.01 | 6.21 |
| 1  | 6  | -1 | 109.72 | 5.78 |
| 1  | 6  | -1 | 116.02 | 6.11 |
| -1 | 6  | 1  | 112.12 | 5.65 |
| 1  | 6  | -1 | 106.24 | 6.04 |
| 1  | -6 | 1  | 121.73 | 6.14 |
| 1  | 6  | -1 | 113.57 | 5.69 |
| -1 | -6 | -1 | 105.81 | 5.59 |
| -1 | -6 | -1 | 115.03 | 6.17 |
| 1  | -6 | 1  | 123.54 | 6.18 |
| -1 | 6  | 1  | 108.43 | 6.24 |
| 1  | -6 | 1  | 104.42 | 5.65 |
| -1 | 6  | 1  | 117.89 | 6.20 |
| 1  | -6 | -1 | 109.37 | 5.66 |
| -1 | -6 | 1  | 111.13 | 5.63 |
| 1  | 6  | 1  | 128.96 | 6.32 |
| -1 | -6 | 1  | 110.83 | 5.59 |
| 1  | 6  | 1  | 106.06 | 6.09 |
| 1  | -6 | -1 | 116.87 | 6.13 |
| -1 | 6  | -1 | 118.51 | 6.27 |
| -1 | 6  | -1 | 120.76 | 6.16 |
| -1 | 6  | -1 | 111.85 | 5.74 |
| -1 | -6 | 1  | 116.40 | 6.16 |
| 1  | 6  | 1  | 115.81 | 5.71 |
| 1  | -6 | -1 | 115.61 | 6.17 |
| 2  | -6 | 1  | 7.74   | 0.87 |
| -2 | 6  | 1  | 8.32   | 0.77 |
| 2  | -6 | 1  | 8.88   | 1.43 |
| 2  | -6 | 1  | 8.25   | 1.57 |
| 2  | 6  | -1 | 10.78  | 1.42 |
| -2 | 6  | 1  | 9.49   | 1.45 |
| 2  | 6  | -1 | 9.46   | 0.83 |
| -2 | -6 | -1 | 10.16  | 1.51 |
| 2  | -6 | 1  | 8.33   | 1.04 |
| 2  | 6  | -1 | 8.89   | 1.21 |
| -2 | -6 | -1 | 9.32   | 0.69 |
| 2  | 6  | 1  | 10.52  | 1.26 |
| 2  | -6 | -1 | 7.86   | 1.05 |
| 2  | -6 | -1 | 8.01   | 0.87 |
| -2 | -6 | 1  | 9.46   | 1.67 |

## CIF S3

|    |    |    |       |      |
|----|----|----|-------|------|
| -2 | -6 | 1  | 9.48  | 0.96 |
| -2 | -6 | 1  | 8.88  | 0.75 |
| 2  | -6 | -1 | 8.50  | 1.41 |
| -2 | 6  | -1 | 6.99  | 1.28 |
| -2 | 6  | -1 | 9.23  | 0.80 |
| 2  | -6 | -1 | 10.34 | 1.37 |
| 2  | -6 | -1 | 9.14  | 0.98 |
| -2 | 6  | -1 | 6.01  | 1.48 |
| 2  | 6  | 1  | 9.19  | 0.86 |
| 2  | 6  | 1  | 9.92  | 1.49 |
| -2 | -6 | 1  | 11.42 | 1.28 |
| -2 | -6 | 1  | 9.16  | 0.71 |
| 3  | -6 | 1  | 2.98  | 0.77 |
| -3 | -6 | -1 | 2.78  | 0.54 |
| 3  | -6 | 1  | 1.88  | 1.23 |
| 3  | 6  | -1 | 3.99  | 0.65 |
| -3 | 6  | 1  | 3.90  | 0.64 |
| 3  | -6 | 1  | 4.83  | 0.94 |
| -3 | -6 | -1 | 3.41  | 0.81 |
| -3 | -6 | -1 | 1.50  | 1.02 |
| 3  | -6 | 1  | 1.79  | 1.05 |
| -3 | -6 | -1 | 4.04  | 0.64 |
| 3  | -6 | 1  | 2.91  | 0.98 |
| -3 | -6 | 1  | 3.34  | 0.52 |
| -3 | 6  | -1 | 2.36  | 0.65 |
| -3 | -6 | 1  | 2.55  | 0.65 |
| 3  | 6  | 1  | 4.06  | 0.66 |
| -3 | -6 | 1  | 3.39  | 0.54 |
| 3  | -6 | -1 | 2.60  | 0.90 |
| 3  | -6 | -1 | 3.51  | 0.93 |
| -3 | 6  | -1 | 2.74  | 0.70 |
| -3 | -6 | 1  | 1.19  | 0.65 |
| -3 | -6 | 1  | 3.83  | 1.24 |
| -3 | 6  | -1 | 3.54  | 1.39 |
| 3  | -6 | -1 | 3.38  | 1.31 |
| -3 | -6 | 1  | 2.75  | 0.48 |
| 4  | -6 | 1  | 11.45 | 1.10 |
| -4 | -6 | -1 | 11.80 | 1.78 |
| -4 | -6 | -1 | 12.67 | 1.06 |
| -4 | -6 | -1 | 11.83 | 0.88 |
| 4  | 6  | -1 | 12.45 | 0.96 |

## CIF S3

|    |    |    |       |      |
|----|----|----|-------|------|
| 4  | -6 | 1  | 9.01  | 1.17 |
| -4 | 6  | 1  | 11.11 | 0.95 |
| -4 | 6  | 1  | 11.96 | 1.00 |
| -4 | -6 | -1 | 10.50 | 0.79 |
| 4  | -6 | 1  | 9.13  | 1.82 |
| -4 | 6  | 1  | 12.70 | 0.98 |
| -4 | -6 | -1 | 12.61 | 0.81 |
| -4 | -6 | -1 | 10.15 | 1.05 |
| 4  | -6 | -1 | 11.30 | 1.18 |
| -4 | 6  | -1 | 12.35 | 1.05 |
| 4  | -6 | -1 | 9.56  | 1.19 |
| -4 | 6  | -1 | 12.01 | 1.01 |
| -4 | -6 | 1  | 12.29 | 0.75 |
| -4 | -6 | 1  | 12.85 | 0.96 |
| 4  | -6 | -1 | 12.78 | 1.72 |
| -4 | -6 | 1  | 12.43 | 0.84 |
| 4  | 6  | 1  | 12.12 | 0.97 |
| -4 | -6 | 1  | 11.78 | 1.03 |
| -4 | -6 | 1  | 13.51 | 0.77 |
| -5 | 6  | 1  | 3.36  | 0.74 |
| -5 | -6 | -1 | 3.17  | 0.84 |
| -5 | 6  | 1  | 3.98  | 0.72 |
| -5 | 6  | 1  | 2.99  | 0.67 |
| -5 | -6 | -1 | 3.33  | 0.79 |
| -5 | -6 | -1 | 3.91  | 0.60 |
| -5 | -6 | -1 | 4.25  | 0.54 |
| 5  | -6 | 1  | 3.23  | 0.98 |
| -5 | -6 | -1 | 3.15  | 0.68 |
| -5 | -6 | -1 | 3.38  | 0.54 |
| -5 | -6 | -1 | 4.07  | 1.02 |
| 5  | 6  | -1 | 3.77  | 0.68 |
| -5 | 6  | -1 | 3.17  | 0.78 |
| 5  | -6 | -1 | 3.92  | 1.00 |
| -5 | 6  | -1 | 3.88  | 0.80 |
| 5  | -6 | -1 | 2.88  | 1.04 |
| -5 | -6 | 1  | 3.79  | 0.90 |
| -5 | -6 | 1  | 3.78  | 0.55 |
| -5 | -6 | 1  | 3.28  | 0.43 |
| -5 | -6 | 1  | 3.80  | 0.61 |
| 5  | 6  | 1  | 3.37  | 0.73 |
| -5 | 6  | -1 | 3.75  | 0.85 |

## CIF S3

|    |    |    |       |      |
|----|----|----|-------|------|
| -5 | -6 | 1  | 3.38  | 0.81 |
| -5 | -6 | 1  | 3.12  | 0.62 |
| -5 | 6  | -1 | 3.82  | 0.74 |
| -6 | -6 | -1 | 8.30  | 0.84 |
| -6 | -6 | -1 | 7.25  | 1.09 |
| -6 | -6 | -1 | 9.14  | 0.62 |
| 6  | -6 | 1  | 6.39  | 1.12 |
| -6 | -6 | -1 | 8.79  | 0.83 |
| -6 | 6  | 1  | 8.41  | 0.88 |
| -6 | -6 | -1 | 6.30  | 1.14 |
| -6 | 6  | 1  | 8.58  | 1.01 |
| -6 | -6 | -1 | 7.40  | 0.77 |
| -6 | 6  | -1 | 7.52  | 0.99 |
| 6  | -6 | -1 | 7.69  | 1.13 |
| -6 | -6 | 1  | 8.40  | 0.74 |
| -6 | -6 | 1  | 7.93  | 1.06 |
| -6 | -6 | 1  | 6.92  | 1.12 |
| 6  | 6  | 1  | 8.28  | 0.93 |
| -6 | -6 | 1  | 8.60  | 0.72 |
| -6 | 6  | -1 | 7.43  | 0.96 |
| -7 | -6 | -1 | 0.02  | 0.46 |
| -7 | -6 | -1 | 0.62  | 1.07 |
| -7 | -6 | -1 | 0.33  | 0.39 |
| -7 | 6  | 1  | -0.01 | 0.70 |
| -7 | 6  | 1  | -0.21 | 0.68 |
| -7 | 6  | 1  | 0.40  | 0.75 |
| -7 | 6  | 1  | 0.15  | 0.71 |
| -7 | 6  | 1  | -0.24 | 0.70 |
| -7 | 6  | 1  | -0.30 | 0.60 |
| -7 | 6  | -1 | 0.58  | 0.83 |
| -7 | 6  | -1 | -0.30 | 0.87 |
| -7 | 6  | -1 | -0.05 | 0.75 |
| -7 | -6 | 1  | -0.09 | 0.38 |
| -7 | 6  | -1 | 0.07  | 1.17 |
| -7 | -6 | 1  | -0.23 | 0.54 |
| -7 | -6 | 1  | 0.30  | 0.38 |
| -7 | 6  | -1 | -0.17 | 0.60 |
| -8 | 6  | 1  | 5.37  | 0.92 |
| -8 | -6 | -1 | 4.99  | 0.62 |
| -8 | -6 | -1 | 6.17  | 0.59 |
| -8 | 6  | 1  | 6.43  | 0.76 |

## CIF S3

|     |    |    |       |      |
|-----|----|----|-------|------|
| -8  | 6  | 1  | 5.86  | 0.89 |
| -8  | 6  | 1  | 5.51  | 0.85 |
| -8  | 6  | 1  | 5.56  | 0.75 |
| -8  | 6  | 1  | 5.65  | 0.83 |
| -8  | 6  | 1  | 5.46  | 0.83 |
| -8  | 6  | -1 | 4.73  | 1.14 |
| -8  | 6  | -1 | 5.21  | 0.93 |
| -8  | 6  | -1 | 5.79  | 0.81 |
| -8  | 6  | -1 | 5.76  | 0.92 |
| -8  | 6  | -1 | 5.72  | 0.79 |
| -8  | 6  | -1 | 5.09  | 0.81 |
| -8  | -6 | 1  | 5.64  | 0.50 |
| -8  | 6  | -1 | 5.73  | 0.84 |
| -8  | 6  | -1 | 5.07  | 0.93 |
| -9  | 6  | 1  | 0.32  | 0.43 |
| -9  | 6  | 1  | 0.25  | 0.35 |
| -9  | 6  | 1  | 0.14  | 0.35 |
| -9  | -6 | -1 | -0.09 | 0.24 |
| -9  | 6  | 1  | 0.37  | 0.43 |
| -9  | 6  | 1  | 0.33  | 0.45 |
| -9  | 6  | -1 | 0.00  | 0.41 |
| -9  | -6 | 1  | 0.12  | 0.14 |
| -9  | 6  | -1 | 0.61  | 0.43 |
| -9  | -6 | 1  | 0.42  | 0.16 |
| -9  | 6  | -1 | 0.09  | 0.45 |
| -9  | 6  | -1 | 0.72  | 0.56 |
| -9  | 6  | -1 | -0.09 | 0.44 |
| -10 | 6  | 1  | 0.87  | 0.25 |
| -10 | 6  | 1  | 0.61  | 0.24 |
| -10 | 6  | 1  | 0.97  | 0.34 |
| -10 | 6  | -1 | 0.82  | 0.28 |
| -10 | 6  | -1 | 1.77  | 0.30 |
| -10 | 6  | -1 | 0.73  | 0.34 |
| -10 | 6  | -1 | 0.71  | 0.20 |
| 0   | 7  | -1 | 12.56 | 1.72 |
| 0   | -7 | 1  | 12.47 | 1.76 |
| 0   | -7 | 1  | 10.71 | 0.93 |
| 0   | 7  | -1 | 11.66 | 0.96 |
| 0   | -7 | -1 | 9.11  | 1.52 |
| 0   | 7  | 1  | 10.74 | 0.90 |
| 0   | -7 | 1  | 12.35 | 1.54 |



## CIF S3

|    |    |    |       |      |
|----|----|----|-------|------|
| 0  | -7 | -1 | 11.22 | 0.95 |
| 0  | -7 | -1 | 10.18 | 1.69 |
| 0  | 7  | 1  | 7.98  | 1.48 |
| 0  | 7  | 1  | 7.50  | 1.62 |
| 0  | -7 | 1  | 11.32 | 0.83 |
| 0  | 7  | 1  | 11.69 | 1.05 |
| 0  | 7  | -1 | 12.47 | 1.09 |
| 1  | -7 | 1  | 22.62 | 2.05 |
| -1 | 7  | 1  | 21.35 | 2.13 |
| -1 | 7  | 1  | 19.52 | 1.92 |
| 1  | -7 | 1  | 20.98 | 1.38 |
| 1  | 7  | -1 | 21.48 | 2.03 |
| -1 | 7  | 1  | 20.63 | 1.33 |
| -1 | -7 | -1 | 23.05 | 2.09 |
| 1  | 7  | -1 | 22.87 | 1.52 |
| 1  | -7 | 1  | 18.80 | 1.96 |
| 1  | 7  | -1 | 22.39 | 1.43 |
| -1 | -7 | -1 | 21.40 | 1.25 |
| -1 | 7  | -1 | 22.56 | 1.33 |
| 1  | 7  | 1  | 22.50 | 2.16 |
| 1  | 7  | 1  | 22.23 | 1.37 |
| 1  | -7 | -1 | 22.88 | 2.06 |
| -1 | -7 | 1  | 21.59 | 1.23 |
| -1 | -7 | 1  | 22.44 | 1.31 |
| -1 | 7  | -1 | 17.14 | 2.07 |
| -1 | 7  | -1 | 20.08 | 1.48 |
| -1 | -7 | 1  | 22.72 | 2.01 |
| 1  | -7 | -1 | 19.35 | 1.98 |
| -1 | 7  | -1 | 23.49 | 2.30 |
| 1  | -7 | -1 | 21.97 | 1.38 |
| 1  | 7  | 1  | 22.36 | 1.55 |
| -2 | -7 | -1 | -0.05 | 0.46 |
| 2  | -7 | 1  | 0.12  | 1.03 |
| 2  | -7 | 1  | 1.38  | 0.63 |
| 2  | -7 | 1  | -0.98 | 0.94 |
| -2 | -7 | -1 | 0.55  | 0.98 |
| -2 | -7 | -1 | -0.12 | 0.52 |
| 2  | 7  | -1 | 0.42  | 0.55 |
| 2  | 7  | -1 | 0.21  | 0.58 |
| -2 | 7  | 1  | 0.40  | 0.97 |
| 2  | 7  | -1 | 1.02  | 0.90 |

## CIF S3

|    |    |    |       |      |
|----|----|----|-------|------|
| -2 | 7  | 1  | 0.47  | 0.48 |
| 2  | -7 | -1 | 0.62  | 0.99 |
| -2 | 7  | -1 | 0.42  | 0.52 |
| -2 | -7 | 1  | -0.01 | 1.11 |
| -2 | -7 | 1  | 0.87  | 0.56 |
| -2 | 7  | -1 | 1.08  | 1.02 |
| 2  | -7 | -1 | 0.37  | 0.62 |
| 2  | 7  | 1  | 0.35  | 0.59 |
| 2  | 7  | 1  | 0.20  | 0.53 |
| 2  | 7  | 1  | -0.40 | 0.92 |
| 2  | -7 | -1 | 0.56  | 0.94 |
| -2 | -7 | 1  | 0.51  | 0.49 |
| -2 | -7 | 1  | 0.69  | 0.43 |
| -3 | -7 | -1 | 11.40 | 0.88 |
| 3  | -7 | 1  | 8.51  | 0.97 |
| -3 | 7  | 1  | 10.66 | 0.96 |
| -3 | -7 | -1 | 8.91  | 1.82 |
| 3  | -7 | 1  | 8.67  | 1.72 |
| 3  | -7 | 1  | 8.20  | 1.23 |
| -3 | -7 | -1 | 9.41  | 0.98 |
| 3  | 7  | -1 | 9.45  | 0.89 |
| -3 | -7 | -1 | 9.71  | 0.78 |
| -3 | 7  | -1 | 10.72 | 1.07 |
| -3 | -7 | 1  | 9.39  | 0.79 |
| -3 | 7  | -1 | 8.96  | 0.91 |
| -3 | -7 | 1  | 9.32  | 1.66 |
| -3 | -7 | 1  | 10.92 | 0.75 |
| -3 | -7 | 1  | 9.83  | 1.01 |
| 3  | -7 | -1 | 8.84  | 1.07 |
| -3 | -7 | 1  | 9.62  | 0.97 |
| 3  | 7  | 1  | 10.89 | 0.98 |
| -4 | -7 | -1 | 20.58 | 1.59 |
| -4 | 7  | 1  | 26.00 | 1.58 |
| -4 | -7 | -1 | 23.36 | 1.57 |
| -4 | -7 | -1 | 24.32 | 1.46 |
| 4  | 7  | -1 | 24.30 | 1.55 |
| -4 | -7 | -1 | 25.13 | 1.64 |
| -4 | 7  | 1  | 25.02 | 1.50 |
| -4 | -7 | -1 | 26.48 | 1.38 |
| 4  | -7 | 1  | 19.92 | 1.66 |
| -4 | 7  | -1 | 24.30 | 1.62 |

## CIF S3

|    |    |    |       |      |
|----|----|----|-------|------|
| -4 | -7 | 1  | 22.44 | 1.55 |
| -4 | -7 | 1  | 25.97 | 1.34 |
| -4 | -7 | 1  | 25.79 | 1.56 |
| 4  | -7 | -1 | 20.13 | 1.66 |
| 4  | 7  | 1  | 25.76 | 1.57 |
| -4 | 7  | -1 | 27.06 | 1.54 |
| -4 | -7 | 1  | 24.14 | 1.35 |
| -4 | -7 | 1  | 24.49 | 1.57 |
| -4 | -7 | 1  | 24.18 | 1.41 |
| 4  | -7 | -1 | 24.02 | 1.91 |
| -5 | -7 | -1 | 7.04  | 1.20 |
| -5 | -7 | -1 | 6.94  | 1.25 |
| -5 | 7  | 1  | 8.42  | 0.90 |
| -5 | -7 | -1 | 7.51  | 0.86 |
| -5 | -7 | -1 | 5.24  | 1.04 |
| -5 | 7  | 1  | 7.28  | 0.82 |
| 5  | -7 | 1  | 5.34  | 1.04 |
| -5 | 7  | 1  | 8.50  | 0.91 |
| -5 | -7 | -1 | 4.97  | 0.94 |
| -5 | -7 | -1 | 6.78  | 0.70 |
| -5 | 7  | 1  | 7.89  | 0.93 |
| -5 | -7 | -1 | 7.51  | 0.68 |
| -5 | -7 | -1 | 8.13  | 0.78 |
| -5 | -7 | 1  | 6.66  | 0.80 |
| -5 | 7  | -1 | 7.62  | 0.95 |
| -5 | -7 | 1  | 7.24  | 1.05 |
| -5 | -7 | 1  | 5.92  | 0.73 |
| -5 | -7 | 1  | 6.70  | 1.10 |
| -5 | 7  | -1 | 7.08  | 0.93 |
| -5 | -7 | 1  | 7.39  | 0.76 |
| 5  | -7 | -1 | 7.21  | 1.21 |
| 5  | 7  | 1  | 8.56  | 0.93 |
| 5  | -7 | -1 | 7.75  | 1.31 |
| -5 | 7  | -1 | 6.71  | 1.01 |
| -5 | -7 | 1  | 7.56  | 0.60 |
| -5 | -7 | 1  | 7.58  | 1.13 |
| -6 | -7 | -1 | 3.97  | 1.01 |
| -6 | 7  | 1  | 3.41  | 0.77 |
| -6 | -7 | -1 | 1.88  | 0.60 |
| 6  | -7 | 1  | 3.71  | 1.10 |
| -6 | -7 | -1 | 1.58  | 0.59 |

## CIF S3

|    |    |    |       |      |
|----|----|----|-------|------|
| -6 | -7 | -1 | 1.92  | 0.96 |
| -6 | 7  | 1  | 3.33  | 0.82 |
| -6 | -7 | -1 | 1.94  | 0.46 |
| -6 | -7 | 1  | 2.93  | 0.93 |
| -6 | -7 | 1  | 3.48  | 0.75 |
| 6  | 7  | 1  | 3.03  | 0.85 |
| -6 | 7  | -1 | 2.90  | 0.71 |
| -6 | -7 | 1  | 1.83  | 1.05 |
| -6 | -7 | 1  | 3.42  | 0.68 |
| -6 | -7 | 1  | 1.64  | 0.47 |
| 6  | -7 | -1 | 3.31  | 1.07 |
| -7 | 7  | 1  | 14.67 | 1.29 |
| -7 | -7 | -1 | 15.93 | 1.06 |
| -7 | 7  | 1  | 15.22 | 1.17 |
| -7 | -7 | -1 | 17.32 | 1.09 |
| -7 | -7 | -1 | 17.79 | 1.50 |
| -7 | 7  | 1  | 16.32 | 1.20 |
| -7 | 7  | 1  | 16.42 | 1.26 |
| -7 | -7 | -1 | 16.80 | 1.11 |
| -7 | 7  | 1  | 16.09 | 1.27 |
| -7 | 7  | 1  | 16.74 | 1.23 |
| -7 | 7  | 1  | 16.98 | 1.21 |
| -7 | 7  | 1  | 15.93 | 1.41 |
| -7 | 7  | -1 | 16.06 | 1.45 |
| -7 | 7  | -1 | 15.90 | 1.24 |
| -7 | 7  | -1 | 17.28 | 1.25 |
| -7 | -7 | 1  | 17.18 | 1.41 |
| -7 | 7  | -1 | 16.14 | 1.23 |
| -7 | -7 | 1  | 14.93 | 1.82 |
| -7 | 7  | -1 | 15.32 | 1.23 |
| -7 | -7 | 1  | 16.16 | 0.96 |
| -7 | -7 | 1  | 18.49 | 1.04 |
| -7 | 7  | -1 | 17.38 | 1.32 |
| -7 | 7  | -1 | 16.70 | 1.23 |
| -7 | 7  | -1 | 15.65 | 1.27 |
| -7 | -7 | 1  | 15.86 | 1.05 |
| -8 | 7  | 1  | 1.12  | 0.55 |
| -8 | 7  | 1  | 3.36  | 0.68 |
| -8 | 7  | 1  | 1.45  | 0.50 |
| -8 | 7  | 1  | 1.94  | 0.52 |
| -8 | 7  | 1  | 1.11  | 0.49 |

## CIF S3

|    |    |    |       |      |
|----|----|----|-------|------|
| -8 | 7  | 1  | 2.49  | 0.55 |
| -8 | -7 | -1 | 1.86  | 0.50 |
| -8 | -7 | -1 | 1.88  | 0.42 |
| -8 | 7  | -1 | 1.15  | 0.55 |
| -8 | 7  | -1 | 0.72  | 0.46 |
| -8 | 7  | -1 | 2.08  | 0.51 |
| -8 | -7 | 1  | 1.46  | 0.30 |
| -8 | -7 | 1  | 2.24  | 0.42 |
| -8 | 7  | -1 | 1.59  | 0.57 |
| -8 | 7  | -1 | 0.90  | 0.52 |
| -8 | 7  | -1 | 1.68  | 0.80 |
| -8 | 7  | -1 | 1.27  | 0.54 |
| -9 | 7  | 1  | 1.18  | 0.41 |
| -9 | -7 | -1 | 0.90  | 0.23 |
| -9 | 7  | 1  | 1.09  | 0.35 |
| -9 | 7  | 1  | 1.43  | 0.43 |
| -9 | 7  | 1  | 0.42  | 0.37 |
| -9 | 7  | 1  | 0.56  | 0.38 |
| -9 | -7 | -1 | 0.96  | 0.23 |
| -9 | 7  | -1 | 1.00  | 0.55 |
| -9 | 7  | -1 | 0.93  | 0.39 |
| -9 | 7  | -1 | 1.29  | 0.40 |
| -9 | 7  | -1 | 0.80  | 0.42 |
| -9 | 7  | -1 | 1.29  | 0.38 |
| 0  | -8 | -1 | 1.16  | 0.65 |
| 0  | -8 | 1  | 0.34  | 0.98 |
| 0  | 8  | -1 | 0.48  | 0.80 |
| 0  | 8  | 1  | 1.20  | 0.56 |
| 0  | -8 | -1 | 5.10  | 1.28 |
| 0  | 8  | 1  | 1.57  | 0.69 |
| 0  | 8  | -1 | 1.85  | 0.78 |
| 0  | -8 | 1  | 2.52  | 0.69 |
| 0  | 8  | 1  | 0.92  | 1.16 |
| 0  | 8  | -1 | 0.11  | 0.95 |
| 0  | -8 | -1 | -0.56 | 1.00 |
| 0  | -8 | 1  | 1.51  | 0.62 |
| 1  | -8 | 1  | 11.23 | 1.75 |
| 1  | -8 | 1  | 11.75 | 1.68 |
| 1  | -8 | 1  | 14.55 | 1.20 |
| 1  | 8  | -1 | 12.67 | 1.09 |
| -1 | -8 | -1 | 13.13 | 1.05 |

## CIF S3

|    |    |    |       |      |
|----|----|----|-------|------|
| 1  | 8  | -1 | 13.94 | 1.17 |
| -1 | 8  | 1  | 12.58 | 1.03 |
| -1 | -8 | -1 | 11.37 | 1.99 |
| 1  | 8  | -1 | 13.08 | 1.78 |
| -1 | -8 | -1 | 11.89 | 1.10 |
| -1 | -8 | -1 | 13.40 | 0.95 |
| 1  | 8  | 1  | 13.03 | 1.27 |
| 1  | 8  | 1  | 14.30 | 1.10 |
| -1 | 8  | -1 | 14.03 | 1.06 |
| 1  | -8 | -1 | 16.87 | 1.88 |
| -1 | 8  | -1 | 12.73 | 1.85 |
| 1  | -8 | -1 | 13.57 | 1.10 |
| -1 | -8 | 1  | 13.17 | 0.93 |
| -1 | -8 | 1  | 12.37 | 1.00 |
| -1 | -8 | 1  | 12.74 | 1.06 |
| -1 | -8 | 1  | 13.17 | 1.02 |
| -1 | -8 | 1  | 14.03 | 1.96 |
| -2 | 8  | 1  | 29.38 | 1.74 |
| 2  | 8  | -1 | 29.66 | 1.96 |
| 2  | 8  | -1 | 29.76 | 2.68 |
| 2  | -8 | 1  | 38.50 | 3.90 |
| -2 | -8 | -1 | 29.91 | 1.74 |
| -2 | -8 | -1 | 29.72 | 1.74 |
| -2 | -8 | -1 | 26.87 | 1.70 |
| 2  | 8  | -1 | 29.86 | 1.84 |
| -2 | -8 | -1 | 30.83 | 1.68 |
| 2  | -8 | 1  | 29.96 | 1.78 |
| 2  | 8  | 1  | 29.05 | 1.84 |
| -2 | -8 | 1  | 28.98 | 1.75 |
| -2 | -8 | 1  | 30.08 | 1.62 |
| -2 | -8 | 1  | 28.61 | 1.73 |
| -2 | 8  | -1 | 30.26 | 1.80 |
| 2  | -8 | -1 | 28.91 | 1.81 |
| -2 | -8 | 1  | 30.08 | 1.70 |
| -3 | 8  | 1  | 7.75  | 0.87 |
| -3 | -8 | -1 | 7.13  | 0.97 |
| -3 | -8 | -1 | 7.46  | 0.98 |
| 3  | 8  | -1 | 7.38  | 0.91 |
| 3  | 8  | -1 | 7.72  | 1.06 |
| 3  | -8 | 1  | 6.45  | 1.00 |
| -3 | -8 | -1 | 7.05  | 0.75 |

## CIF S3

|    |    |    |      |      |
|----|----|----|------|------|
| -3 | -8 | -1 | 7.78 | 0.90 |
| -3 | -8 | 1  | 7.45 | 0.97 |
| 3  | 8  | 1  | 6.30 | 0.95 |
| -3 | 8  | -1 | 6.69 | 1.73 |
| -3 | -8 | 1  | 6.47 | 0.86 |
| -3 | -8 | 1  | 6.89 | 0.71 |
| -3 | -8 | 1  | 6.83 | 1.03 |
| -3 | 8  | -1 | 7.01 | 0.98 |
| -3 | -8 | 1  | 7.06 | 1.05 |
| -4 | 8  | 1  | 5.16 | 0.96 |
| -4 | -8 | -1 | 7.07 | 1.17 |
| -4 | 8  | 1  | 4.83 | 0.84 |
| -4 | -8 | -1 | 5.22 | 1.17 |
| -4 | -8 | -1 | 7.03 | 1.03 |
| 4  | 8  | -1 | 5.89 | 0.86 |
| -4 | -8 | -1 | 6.50 | 0.87 |
| -4 | -8 | -1 | 5.36 | 0.74 |
| -4 | -8 | -1 | 7.37 | 0.85 |
| -4 | 8  | 1  | 5.29 | 0.95 |
| -4 | -8 | 1  | 4.99 | 1.01 |
| -4 | -8 | 1  | 4.90 | 0.78 |
| -4 | -8 | 1  | 4.66 | 0.97 |
| 4  | -8 | -1 | 7.28 | 1.25 |
| -4 | 8  | -1 | 5.90 | 1.01 |
| -4 | 8  | -1 | 6.00 | 0.89 |
| -4 | -8 | 1  | 6.00 | 0.65 |
| -4 | -8 | 1  | 5.92 | 0.81 |
| -4 | -8 | 1  | 5.85 | 0.66 |
| -4 | -8 | 1  | 4.62 | 0.93 |
| -4 | 8  | -1 | 5.47 | 0.86 |
| -5 | 8  | 1  | 4.61 | 0.90 |
| -5 | -8 | -1 | 1.98 | 0.81 |
| -5 | -8 | -1 | 3.87 | 0.65 |
| -5 | -8 | -1 | 4.13 | 0.82 |
| -5 | -8 | -1 | 3.15 | 0.88 |
| -5 | -8 | -1 | 3.91 | 0.94 |
| 5  | 8  | -1 | 3.94 | 0.88 |
| -5 | 8  | 1  | 4.81 | 0.92 |
| 5  | -8 | 1  | 0.89 | 0.99 |
| -5 | -8 | -1 | 3.71 | 0.90 |
| -5 | 8  | 1  | 3.83 | 0.86 |

## CIF S3

|    |    |    |       |      |
|----|----|----|-------|------|
| -5 | -8 | -1 | 3.68  | 0.66 |
| -5 | -8 | -1 | 5.29  | 0.87 |
| -5 | 8  | -1 | 5.12  | 0.90 |
| -5 | -8 | 1  | 4.26  | 0.82 |
| -5 | -8 | 1  | 3.59  | 0.86 |
| -5 | 8  | -1 | 3.99  | 0.99 |
| 5  | -8 | -1 | 3.05  | 1.09 |
| -5 | -8 | 1  | 3.60  | 0.96 |
| -5 | 8  | -1 | 4.43  | 0.95 |
| -5 | -8 | 1  | 4.23  | 0.97 |
| -5 | -8 | 1  | 3.02  | 0.80 |
| -5 | -8 | 1  | 4.77  | 0.54 |
| -6 | 8  | 1  | 26.80 | 1.92 |
| -6 | -8 | -1 | 32.48 | 2.00 |
| -6 | -8 | -1 | 34.55 | 1.90 |
| -6 | -8 | -1 | 36.74 | 1.92 |
| -6 | -8 | -1 | 33.86 | 2.15 |
| -6 | -8 | -1 | 32.64 | 1.73 |
| -6 | 8  | 1  | 34.87 | 2.12 |
| -6 | -8 | -1 | 36.41 | 2.16 |
| -6 | 8  | 1  | 33.92 | 2.00 |
| -6 | 8  | 1  | 36.13 | 1.96 |
| -6 | 8  | 1  | 33.93 | 1.98 |
| -6 | -8 | -1 | 30.97 | 2.10 |
| -6 | -8 | -1 | 33.12 | 1.83 |
| -6 | 8  | 1  | 34.54 | 1.91 |
| -6 | -8 | 1  | 30.62 | 1.93 |
| -6 | 8  | -1 | 33.60 | 2.02 |
| -6 | -8 | 1  | 29.18 | 1.82 |
| -6 | -8 | 1  | 31.16 | 1.75 |
| -6 | 8  | -1 | 35.79 | 2.14 |
| -6 | 8  | -1 | 34.96 | 1.91 |
| -6 | -8 | 1  | 32.07 | 1.79 |
| -6 | -8 | 1  | 33.74 | 1.83 |
| -6 | 8  | -1 | 30.51 | 1.96 |
| -6 | 8  | -1 | 37.85 | 2.17 |
| -6 | -8 | 1  | 31.66 | 2.02 |
| -6 | -8 | 1  | 34.36 | 2.11 |
| -6 | 8  | -1 | 32.52 | 1.74 |
| -6 | -8 | 1  | 33.30 | 2.08 |
| -6 | -8 | 1  | 33.41 | 1.86 |



## CIF S3

|    |    |    |       |      |
|----|----|----|-------|------|
| -7 | 8  | 1  | 12.13 | 1.09 |
| -7 | -8 | -1 | 10.95 | 0.96 |
| -7 | 8  | 1  | 11.50 | 1.04 |
| -7 | -8 | -1 | 13.42 | 1.34 |
| -7 | 8  | 1  | 9.26  | 1.28 |
| -7 | -8 | -1 | 12.09 | 0.90 |
| -7 | 8  | 1  | 12.97 | 1.10 |
| -7 | -8 | -1 | 11.71 | 0.95 |
| -7 | -8 | -1 | 13.01 | 1.33 |
| -7 | 8  | 1  | 12.18 | 1.04 |
| -7 | -8 | -1 | 12.72 | 0.91 |
| -7 | 8  | 1  | 10.82 | 1.06 |
| -7 | 8  | 1  | 12.29 | 1.05 |
| -7 | 8  | 1  | 12.33 | 1.10 |
| -7 | 8  | -1 | 10.46 | 1.09 |
| -7 | 8  | -1 | 11.87 | 1.09 |
| -7 | 8  | -1 | 10.99 | 1.04 |
| -7 | -8 | 1  | 11.25 | 0.85 |
| -7 | 8  | -1 | 12.33 | 1.07 |
| -7 | -8 | 1  | 11.87 | 0.76 |
| -7 | 8  | -1 | 11.30 | 1.29 |
| -7 | 8  | -1 | 11.29 | 1.15 |
| -7 | -8 | 1  | 12.66 | 1.32 |
| -7 | -8 | 1  | 11.09 | 1.21 |
| -7 | -8 | 1  | 12.00 | 0.81 |
| -8 | -8 | -1 | 31.02 | 1.89 |
| -8 | 8  | 1  | 31.23 | 1.72 |
| -8 | -8 | -1 | 32.69 | 1.66 |
| -8 | 8  | 1  | 32.96 | 1.78 |
| -8 | 8  | 1  | 31.41 | 1.81 |
| -8 | 8  | 1  | 31.50 | 1.76 |
| -8 | 8  | 1  | 32.14 | 1.73 |
| -8 | 8  | 1  | 31.54 | 1.71 |
| -8 | 8  | -1 | 30.18 | 1.77 |
| -8 | 8  | -1 | 31.80 | 1.83 |
| -8 | -8 | 1  | 33.12 | 1.64 |
| -8 | 8  | -1 | 30.96 | 1.77 |
| -8 | 8  | -1 | 32.47 | 1.80 |
| -8 | 8  | -1 | 32.26 | 1.72 |
| -8 | -8 | 1  | 32.62 | 1.61 |
| -8 | 8  | -1 | 31.23 | 1.76 |

## CIF S3

|    |    |    |       |      |
|----|----|----|-------|------|
| -9 | 8  | 1  | 3.54  | 0.54 |
| -9 | 8  | 1  | 3.49  | 0.50 |
| -9 | -8 | -1 | 3.16  | 0.29 |
| -9 | 8  | 1  | 3.68  | 0.49 |
| -9 | -8 | -1 | 3.53  | 0.31 |
| -9 | 8  | 1  | 3.59  | 0.54 |
| 9  | -8 | 1  | 4.85  | 0.80 |
| -9 | -8 | -1 | 3.06  | 0.33 |
| -9 | 8  | -1 | 3.17  | 0.75 |
| -9 | 8  | -1 | 3.37  | 0.55 |
| -9 | 8  | -1 | 3.28  | 0.54 |
| -9 | 8  | -1 | 3.58  | 0.49 |
| -9 | 8  | -1 | 3.80  | 0.58 |
| 0  | -9 | 1  | 2.96  | 0.65 |
| 0  | 9  | 1  | 0.68  | 0.78 |
| 0  | -9 | -1 | 1.57  | 0.71 |
| 0  | 9  | -1 | 1.30  | 0.86 |
| 0  | -9 | 1  | 1.95  | 0.71 |
| 1  | -9 | 1  | 5.10  | 0.90 |
| -1 | 9  | 1  | 3.99  | 0.81 |
| -1 | -9 | -1 | 3.89  | 0.95 |
| -1 | -9 | -1 | 3.79  | 0.79 |
| -1 | -9 | -1 | 3.03  | 0.72 |
| 1  | 9  | -1 | 2.15  | 0.91 |
| 1  | 9  | -1 | 3.43  | 0.88 |
| 1  | -9 | -1 | 4.41  | 0.91 |
| -1 | -9 | 1  | 5.63  | 0.85 |
| -1 | -9 | 1  | 4.20  | 0.90 |
| -1 | -9 | 1  | 3.75  | 0.72 |
| 1  | 9  | 1  | 3.39  | 0.94 |
| -1 | 9  | -1 | 4.41  | 0.85 |
| -2 | -9 | -1 | 11.39 | 1.03 |
| -2 | -9 | -1 | 11.72 | 1.00 |
| -2 | 9  | 1  | 11.83 | 1.09 |
| -2 | -9 | -1 | 11.82 | 1.26 |
| -2 | -9 | -1 | 11.26 | 1.07 |
| 2  | 9  | -1 | 9.62  | 1.24 |
| 2  | -9 | 1  | 12.95 | 1.17 |
| -2 | -9 | -1 | 11.17 | 1.57 |
| -2 | -9 | -1 | 14.07 | 1.23 |
| 2  | 9  | -1 | 14.33 | 1.25 |

## CIF S3

|    |    |    |       |      |
|----|----|----|-------|------|
| 2  | 9  | 1  | 11.43 | 1.13 |
| -2 | -9 | 1  | 11.41 | 1.12 |
| 2  | -9 | -1 | 11.82 | 1.33 |
| -2 | -9 | 1  | 8.82  | 1.11 |
| 2  | 9  | 1  | 11.59 | 1.22 |
| -2 | 9  | -1 | 11.64 | 1.16 |
| -2 | -9 | 1  | 13.09 | 1.11 |
| -2 | 9  | -1 | 13.18 | 1.19 |
| -2 | -9 | 1  | 11.65 | 0.99 |
| -2 | -9 | 1  | 12.59 | 1.16 |
| -2 | -9 | 1  | 11.86 | 0.96 |
| 3  | 9  | -1 | 20.41 | 1.56 |
| -3 | -9 | -1 | 23.86 | 1.47 |
| -3 | -9 | -1 | 21.75 | 1.53 |
| -3 | -9 | -1 | 22.73 | 1.53 |
| -3 | -9 | -1 | 20.14 | 1.48 |
| -3 | -9 | -1 | 22.79 | 1.35 |
| -3 | 9  | 1  | 21.17 | 1.46 |
| -3 | -9 | -1 | 23.06 | 1.43 |
| 3  | -9 | 1  | 21.80 | 1.57 |
| 3  | 9  | 1  | 19.77 | 1.49 |
| 3  | -9 | -1 | 20.67 | 1.56 |
| -3 | 9  | -1 | 23.64 | 1.51 |
| -3 | -9 | 1  | 21.52 | 1.44 |
| -3 | -9 | 1  | 18.76 | 1.44 |
| -3 | -9 | 1  | 20.95 | 1.44 |
| 3  | 9  | 1  | 16.06 | 1.67 |
| -3 | -9 | 1  | 22.32 | 1.50 |
| -3 | -9 | 1  | 23.04 | 1.36 |
| -4 | 9  | 1  | 2.17  | 0.74 |
| -4 | -9 | -1 | 1.87  | 0.56 |
| -4 | 9  | 1  | 2.10  | 0.77 |
| -4 | -9 | -1 | 2.05  | 0.81 |
| -4 | -9 | -1 | 3.06  | 0.77 |
| -4 | -9 | -1 | 2.24  | 0.73 |
| -4 | 9  | 1  | 3.78  | 0.79 |
| -4 | -9 | -1 | 2.47  | 0.89 |
| -4 | -9 | -1 | 1.39  | 0.84 |
| 4  | 9  | -1 | 0.56  | 0.79 |
| -4 | -9 | -1 | 1.85  | 0.70 |
| 4  | 9  | -1 | 4.83  | 1.03 |

## CIF S3

|    |    |    |       |      |
|----|----|----|-------|------|
| -4 | -9 | 1  | 2.29  | 0.76 |
| -4 | 9  | -1 | 2.33  | 0.82 |
| -4 | -9 | 1  | 1.41  | 0.75 |
| -4 | -9 | 1  | 1.37  | 0.80 |
| -4 | -9 | 1  | 3.20  | 0.50 |
| 4  | 9  | 1  | 1.97  | 0.80 |
| -4 | -9 | 1  | 3.07  | 0.70 |
| -4 | 9  | -1 | 1.81  | 0.81 |
| -4 | 9  | -1 | 2.22  | 0.72 |
| -4 | -9 | 1  | 3.40  | 0.81 |
| -4 | -9 | 1  | 2.74  | 0.89 |
| -4 | -9 | 1  | 2.92  | 0.77 |
| -5 | -9 | -1 | 8.69  | 0.77 |
| -5 | -9 | -1 | 8.52  | 0.79 |
| -5 | -9 | -1 | 10.29 | 1.20 |
| -5 | 9  | 1  | 8.67  | 1.02 |
| -5 | -9 | -1 | 9.21  | 1.01 |
| -5 | 9  | 1  | 6.21  | 1.02 |
| -5 | 9  | 1  | 9.14  | 1.05 |
| -5 | -9 | -1 | 10.66 | 1.20 |
| -5 | -9 | -1 | 8.96  | 1.19 |
| -5 | -9 | -1 | 7.16  | 0.90 |
| -5 | -9 | 1  | 9.06  | 1.22 |
| -5 | 9  | -1 | 9.15  | 1.11 |
| -5 | -9 | 1  | 8.20  | 1.11 |
| -5 | -9 | 1  | 7.60  | 0.68 |
| -5 | 9  | -1 | 9.60  | 1.06 |
| -5 | -9 | 1  | 8.28  | 1.31 |
| -5 | 9  | -1 | 8.27  | 1.06 |
| -5 | -9 | 1  | 8.27  | 0.94 |
| -6 | -9 | -1 | 9.58  | 1.31 |
| -6 | -9 | -1 | 8.29  | 0.93 |
| -6 | -9 | -1 | 5.69  | 0.98 |
| -6 | -9 | -1 | 6.83  | 0.95 |
| -6 | -9 | -1 | 6.90  | 1.11 |
| -6 | 9  | 1  | 9.73  | 0.99 |
| -6 | 9  | 1  | 7.08  | 0.94 |
| -6 | 9  | 1  | 7.11  | 1.01 |
| 6  | -9 | 1  | 6.98  | 1.22 |
| -6 | -9 | -1 | 8.28  | 0.98 |
| -6 | 9  | 1  | 8.95  | 1.29 |

## CIF S3

|    |    |    |       |      |
|----|----|----|-------|------|
| -6 | -9 | -1 | 7.22  | 1.29 |
| -6 | 9  | 1  | 7.30  | 1.03 |
| -6 | 9  | 1  | 7.51  | 0.90 |
| -6 | 9  | -1 | 8.50  | 0.88 |
| -6 | 9  | -1 | 6.78  | 1.06 |
| -6 | -9 | 1  | 8.01  | 1.17 |
| -6 | 9  | -1 | 6.90  | 0.66 |
| -6 | -9 | 1  | 8.54  | 0.76 |
| -6 | -9 | 1  | 7.43  | 0.85 |
| -6 | -9 | 1  | 6.77  | 0.73 |
| -6 | 9  | -1 | 7.49  | 1.25 |
| -6 | -9 | 1  | 7.23  | 0.88 |
| -6 | -9 | 1  | 8.10  | 1.12 |
| -6 | -9 | 1  | 8.15  | 0.79 |
| -6 | 9  | -1 | 7.33  | 1.05 |
| -6 | -9 | 1  | 8.12  | 1.25 |
| -7 | 9  | 1  | -0.38 | 0.58 |
| -7 | 9  | 1  | 0.33  | 0.52 |
| -7 | -9 | -1 | 0.47  | 0.86 |
| -7 | 9  | 1  | 0.51  | 0.75 |
| -7 | 9  | 1  | 0.33  | 0.57 |
| -7 | -9 | -1 | 0.45  | 0.34 |
| -7 | -9 | -1 | 0.92  | 0.38 |
| -7 | -9 | -1 | 0.15  | 0.40 |
| -7 | -9 | -1 | 0.43  | 0.50 |
| -7 | 9  | 1  | 0.77  | 0.62 |
| -7 | 9  | 1  | 0.06  | 0.51 |
| -7 | 9  | 1  | -0.01 | 0.60 |
| 7  | -9 | 1  | 1.71  | 0.67 |
| -7 | -9 | -1 | 0.56  | 0.87 |
| -7 | -9 | 1  | -0.08 | 0.85 |
| -7 | -9 | 1  | 0.73  | 0.34 |
| -7 | 9  | -1 | -0.16 | 0.59 |
| -7 | 9  | -1 | 0.04  | 0.58 |
| -7 | 9  | -1 | 0.79  | 0.59 |
| -7 | -9 | 1  | 0.46  | 0.24 |
| -7 | 9  | -1 | 0.72  | 0.81 |
| -7 | -9 | 1  | 0.45  | 0.47 |
| -7 | -9 | 1  | 0.30  | 0.67 |
| -8 | 9  | 1  | 2.46  | 0.53 |
| -8 | 9  | 1  | 1.05  | 0.42 |

## CIF S3

|    |     |    |       |      |
|----|-----|----|-------|------|
| -8 | -9  | -1 | 1.25  | 0.32 |
| -8 | 9   | 1  | 0.93  | 0.45 |
| -8 | 9   | 1  | 1.85  | 0.44 |
| -8 | 9   | 1  | 0.92  | 0.46 |
| -8 | 9   | 1  | 0.26  | 0.73 |
| 8  | -9  | 1  | 1.14  | 0.58 |
| -8 | 9   | -1 | 1.48  | 0.65 |
| -8 | 9   | -1 | 1.36  | 0.51 |
| -8 | 9   | -1 | 1.27  | 0.39 |
| -8 | -9  | 1  | 1.82  | 0.33 |
| -8 | 9   | -1 | 1.51  | 0.44 |
| 8  | -9  | -1 | 1.91  | 0.75 |
| -8 | -9  | 1  | 2.04  | 0.40 |
| -8 | 9   | -1 | 1.15  | 0.48 |
| -8 | 9   | -1 | 0.85  | 0.48 |
| -9 | 9   | 1  | 2.19  | 0.40 |
| -9 | 9   | 1  | 1.64  | 0.32 |
| -9 | 9   | 1  | 2.07  | 0.36 |
| -9 | 9   | 1  | 2.73  | 0.41 |
| 9  | -9  | 1  | 2.12  | 0.61 |
| -9 | 9   | -1 | 2.28  | 0.42 |
| -9 | 9   | -1 | 2.71  | 0.48 |
| -9 | 9   | -1 | 1.26  | 0.36 |
| 9  | -9  | -1 | 2.74  | 0.64 |
| 0  | -10 | -1 | 6.13  | 1.17 |
| 0  | -10 | 1  | 6.03  | 0.98 |
| 0  | -10 | 1  | 7.73  | 1.12 |
| 0  | -10 | 1  | 5.61  | 1.04 |
| 0  | -10 | -1 | 8.07  | 1.14 |
| 0  | -10 | -1 | 6.90  | 0.97 |
| 1  | 10  | -1 | 10.73 | 1.31 |
| -1 | 10  | 1  | 10.51 | 1.20 |
| -1 | -10 | -1 | 11.75 | 1.24 |
| -1 | -10 | -1 | 9.96  | 1.28 |
| -1 | -10 | -1 | 12.34 | 1.06 |
| 1  | -10 | 1  | 10.82 | 1.18 |
| -1 | -10 | -1 | 11.87 | 1.21 |
| 1  | -10 | -1 | 10.42 | 1.21 |
| -1 | -10 | 1  | 10.18 | 1.02 |
| -1 | -10 | 1  | 10.71 | 1.16 |
| -1 | 10  | -1 | 9.13  | 1.11 |

## CIF S3

|    |     |    |       |      |
|----|-----|----|-------|------|
| -1 | -10 | 1  | 11.81 | 1.13 |
| 1  | 10  | 1  | 10.84 | 1.30 |
| -1 | -10 | 1  | 8.79  | 1.17 |
| 2  | -10 | 1  | 12.76 | 1.39 |
| -2 | -10 | -1 | 10.46 | 1.02 |
| -2 | -10 | -1 | 9.47  | 1.30 |
| -2 | -10 | -1 | 11.68 | 1.02 |
| 2  | 10  | -1 | 7.02  | 1.33 |
| -2 | -10 | -1 | 13.60 | 1.20 |
| -2 | -10 | -1 | 10.71 | 1.16 |
| 2  | 10  | -1 | 11.13 | 1.31 |
| -2 | 10  | 1  | 11.18 | 1.15 |
| 2  | -10 | -1 | 11.80 | 1.42 |
| -2 | 10  | -1 | 11.36 | 1.17 |
| 2  | 10  | 1  | 9.27  | 1.19 |
| -2 | -10 | 1  | 11.59 | 1.10 |
| -2 | 10  | -1 | 13.04 | 1.33 |
| -2 | -10 | 1  | 10.64 | 1.29 |
| 2  | 10  | 1  | 9.69  | 2.06 |
| -2 | -10 | 1  | 12.22 | 1.10 |
| -2 | -10 | 1  | 13.44 | 1.09 |
| -3 | -10 | -1 | 8.85  | 1.11 |
| -3 | -10 | -1 | 10.73 | 1.24 |
| -3 | -10 | -1 | 8.95  | 1.23 |
| -3 | 10  | 1  | 10.74 | 1.22 |
| -3 | -10 | -1 | 8.86  | 1.12 |
| -3 | -10 | -1 | 11.12 | 1.06 |
| -3 | -10 | -1 | 11.85 | 0.99 |
| 3  | 10  | -1 | 8.51  | 1.20 |
| 3  | -10 | 1  | 13.39 | 1.39 |
| -3 | -10 | -1 | 10.95 | 1.08 |
| -3 | -10 | -1 | 10.65 | 1.03 |
| -3 | -10 | 1  | 10.53 | 1.12 |
| -3 | -10 | 1  | 11.44 | 1.10 |
| -3 | -10 | 1  | 10.61 | 1.03 |
| -3 | -10 | 1  | 10.84 | 1.31 |
| -3 | 10  | -1 | 11.20 | 1.26 |
| 3  | -10 | -1 | 11.12 | 1.26 |
| -3 | 10  | -1 | 9.76  | 1.28 |
| -3 | -10 | 1  | 8.78  | 0.96 |
| 3  | 10  | 1  | 8.42  | 1.24 |

## CIF S3

|    |     |    |       |      |
|----|-----|----|-------|------|
| -3 | -10 | 1  | 11.31 | 1.09 |
| -4 | -10 | -1 | 2.65  | 0.70 |
| -4 | -10 | -1 | 0.36  | 0.91 |
| -4 | -10 | -1 | 1.28  | 0.74 |
| -4 | -10 | -1 | 1.09  | 0.57 |
| -4 | 10  | 1  | 2.96  | 0.95 |
| -4 | 10  | 1  | 1.04  | 0.76 |
| -4 | -10 | -1 | 1.37  | 0.87 |
| -4 | -10 | -1 | 1.68  | 0.51 |
| -4 | -10 | -1 | 3.08  | 0.92 |
| -4 | 10  | 1  | 1.26  | 0.71 |
| -4 | -10 | 1  | 2.08  | 0.72 |
| -4 | 10  | -1 | 1.91  | 0.83 |
| -4 | -10 | 1  | 1.13  | 0.80 |
| -4 | -10 | 1  | 1.52  | 0.66 |
| -4 | 10  | -1 | 3.28  | 1.05 |
| -4 | -10 | 1  | 1.66  | 0.91 |
| -4 | -10 | 1  | 1.59  | 0.80 |
| -5 | 10  | 1  | 6.35  | 1.45 |
| -5 | -10 | -1 | 5.97  | 1.01 |
| 5  | -10 | 1  | 6.46  | 1.10 |
| -5 | 10  | 1  | 7.80  | 1.00 |
| -5 | -10 | -1 | 4.80  | 1.19 |
| -5 | -10 | -1 | 5.31  | 1.30 |
| -5 | 10  | 1  | 6.38  | 0.69 |
| -5 | -10 | -1 | 7.75  | 0.99 |
| -5 | -10 | -1 | 6.07  | 1.09 |
| -5 | 10  | 1  | 8.28  | 1.01 |
| -5 | -10 | -1 | 5.63  | 0.93 |
| -5 | 10  | 1  | 4.84  | 1.23 |
| -5 | 10  | 1  | 7.09  | 1.02 |
| -5 | -10 | -1 | 5.05  | 0.83 |
| -5 | -10 | -1 | 7.01  | 1.28 |
| -5 | -10 | 1  | 5.72  | 0.96 |
| -5 | -10 | 1  | 8.72  | 1.23 |
| -5 | -10 | 1  | 6.94  | 1.17 |
| -5 | 10  | -1 | 6.26  | 1.02 |
| -5 | -10 | 1  | 7.90  | 0.88 |
| -5 | -10 | 1  | 7.86  | 1.16 |
| -5 | 10  | -1 | 1.78  | 1.13 |
| -5 | 10  | -1 | 7.00  | 1.31 |



## CIF S3

|    |     |    |       |      |
|----|-----|----|-------|------|
| 5  | -10 | -1 | 6.35  | 1.21 |
| -5 | 10  | -1 | 8.27  | 1.38 |
| -5 | 10  | -1 | 7.13  | 1.37 |
| -5 | -10 | 1  | 8.51  | 0.98 |
| -5 | 10  | -1 | 6.39  | 0.88 |
| -6 | -10 | -1 | 12.42 | 1.37 |
| 6  | -10 | 1  | 13.57 | 1.19 |
| -6 | 10  | 1  | 12.41 | 1.08 |
| -6 | -10 | -1 | 11.83 | 1.24 |
| -6 | -10 | -1 | 11.59 | 1.05 |
| -6 | 10  | 1  | 12.66 | 1.09 |
| -6 | -10 | -1 | 11.97 | 1.28 |
| -6 | -10 | -1 | 11.95 | 0.98 |
| -6 | 10  | 1  | 12.47 | 1.34 |
| -6 | 10  | 1  | 11.53 | 1.15 |
| -6 | -10 | -1 | 10.10 | 1.09 |
| -6 | 10  | 1  | 11.62 | 1.01 |
| -6 | -10 | -1 | 10.92 | 1.00 |
| -6 | -10 | 1  | 13.20 | 0.93 |
| -6 | -10 | 1  | 14.63 | 1.31 |
| -6 | -10 | 1  | 13.33 | 1.35 |
| -6 | 10  | -1 | 11.68 | 1.32 |
| -6 | -10 | 1  | 12.23 | 0.99 |
| -6 | -10 | 1  | 11.29 | 0.89 |
| -6 | 10  | -1 | 12.28 | 1.12 |
| -6 | 10  | -1 | 11.36 | 1.09 |
| -6 | 10  | -1 | 12.41 | 1.15 |
| -6 | -10 | 1  | 12.57 | 1.20 |
| -6 | -10 | 1  | 11.31 | 0.97 |
| 6  | -10 | -1 | 11.61 | 1.30 |
| -6 | -10 | 1  | 10.73 | 0.97 |
| -7 | 10  | 1  | 1.39  | 0.56 |
| -7 | -10 | -1 | 3.59  | 1.20 |
| -7 | 10  | 1  | 4.07  | 0.83 |
| -7 | -10 | -1 | 3.28  | 0.58 |
| -7 | 10  | 1  | 2.70  | 0.72 |
| -7 | 10  | 1  | 2.59  | 0.72 |
| -7 | 10  | 1  | 1.71  | 0.56 |
| -7 | 10  | 1  | 3.55  | 0.67 |
| -7 | -10 | -1 | 2.96  | 0.56 |
| -7 | -10 | -1 | 1.91  | 0.48 |

## CIF S3

|    |     |    |       |      |
|----|-----|----|-------|------|
| 7  | -10 | 1  | 1.76  | 0.60 |
| -7 | 10  | 1  | 1.89  | 0.52 |
| -7 | -10 | 1  | 4.75  | 1.19 |
| -7 | -10 | 1  | 2.46  | 0.62 |
| 7  | -10 | -1 | 3.17  | 0.96 |
| -7 | 10  | -1 | 1.10  | 0.55 |
| -7 | 10  | -1 | 3.08  | 0.76 |
| -7 | -10 | 1  | 1.59  | 0.62 |
| -7 | -10 | 1  | 2.47  | 0.54 |
| -7 | 10  | -1 | 3.24  | 0.82 |
| -8 | -10 | -1 | 0.35  | 0.24 |
| -8 | 10  | 1  | 0.18  | 0.31 |
| -8 | 10  | 1  | 0.17  | 0.38 |
| -8 | 10  | 1  | -0.07 | 0.38 |
| -8 | 10  | 1  | 0.85  | 0.30 |
| -8 | -10 | -1 | 0.59  | 0.26 |
| -8 | 10  | 1  | -0.08 | 0.32 |
| 8  | -10 | 1  | 0.36  | 0.44 |
| -8 | 10  | -1 | 0.04  | 0.36 |
| -8 | 10  | -1 | 0.41  | 0.51 |
| -8 | 10  | -1 | 0.03  | 0.35 |
| 8  | -10 | -1 | -0.74 | 0.47 |
| -8 | 10  | -1 | 0.11  | 0.30 |
| -8 | -10 | 1  | 0.46  | 0.19 |
| -8 | -10 | 1  | 0.06  | 0.22 |
| -8 | -10 | 1  | 0.19  | 0.15 |
| -8 | 10  | -1 | -0.05 | 0.42 |
| 0  | -11 | 1  | 4.52  | 1.14 |
| 0  | -11 | -1 | 2.54  | 0.97 |
| 0  | -11 | -1 | 4.00  | 1.13 |
| 0  | -11 | 1  | 2.78  | 1.06 |
| 0  | -11 | 1  | 4.13  | 0.97 |
| 0  | -11 | -1 | 4.53  | 0.96 |
| 1  | 11  | -1 | 18.25 | 1.72 |
| -1 | -11 | -1 | 20.35 | 1.59 |
| -1 | -11 | -1 | 20.96 | 1.50 |
| -1 | -11 | -1 | 18.42 | 1.63 |
| -1 | 11  | 1  | 20.98 | 1.53 |
| -1 | -11 | -1 | 22.61 | 1.60 |
| 1  | -11 | 1  | 18.95 | 1.55 |
| -1 | -11 | 1  | 21.23 | 1.52 |

## CIF S3

|    |     |    |       |      |
|----|-----|----|-------|------|
| -1 | -11 | 1  | 21.21 | 1.51 |
| 1  | -11 | -1 | 20.50 | 1.58 |
| -1 | 11  | -1 | 18.16 | 1.56 |
| -1 | -11 | 1  | 20.07 | 1.51 |
| -1 | -11 | 1  | 23.73 | 1.54 |
| -2 | -11 | -1 | 24.03 | 1.69 |
| -2 | -11 | -1 | 22.98 | 1.73 |
| 2  | -11 | 1  | 26.00 | 1.85 |
| -2 | -11 | -1 | 24.97 | 1.75 |
| -2 | -11 | -1 | 24.39 | 1.57 |
| -2 | 11  | 1  | 24.60 | 1.77 |
| -2 | 11  | -1 | 27.38 | 1.83 |
| -2 | -11 | 1  | 25.56 | 1.72 |
| -2 | -11 | 1  | 24.61 | 1.63 |
| 2  | -11 | -1 | 25.12 | 1.86 |
| -2 | -11 | 1  | 25.79 | 1.79 |
| -2 | -11 | 1  | 22.32 | 1.61 |
| -3 | -11 | -1 | 1.25  | 0.90 |
| -3 | -11 | -1 | 3.56  | 0.85 |
| 3  | -11 | 1  | 1.18  | 1.01 |
| -3 | -11 | -1 | 2.49  | 0.79 |
| -3 | -11 | -1 | 1.22  | 0.73 |
| 3  | -11 | 1  | 1.42  | 0.79 |
| -3 | -11 | -1 | 1.30  | 1.04 |
| -3 | 11  | 1  | 3.88  | 1.07 |
| -3 | -11 | -1 | 3.43  | 0.88 |
| -3 | -11 | -1 | 1.54  | 0.81 |
| 3  | -11 | 1  | 3.09  | 0.76 |
| -3 | -11 | -1 | 1.70  | 0.71 |
| -3 | -11 | -1 | 1.26  | 0.99 |
| -3 | -11 | 1  | 2.00  | 0.77 |
| -3 | -11 | 1  | 2.00  | 0.73 |
| -3 | 11  | -1 | 1.01  | 0.86 |
| -3 | -11 | 1  | 2.85  | 0.95 |
| 3  | -11 | -1 | 1.73  | 0.66 |
| -3 | -11 | 1  | 1.02  | 0.67 |
| -3 | 11  | -1 | 1.42  | 0.84 |
| -3 | -11 | 1  | 1.45  | 0.56 |
| -3 | -11 | 1  | 1.38  | 0.74 |
| -3 | -11 | 1  | 1.00  | 0.77 |
| -3 | -11 | 1  | 1.76  | 0.87 |

## CIF S3

|    |     |    |       |      |
|----|-----|----|-------|------|
| -3 | -11 | 1  | 1.53  | 0.81 |
| 3  | -11 | -1 | 1.54  | 0.98 |
| -4 | -11 | -1 | 4.25  | 1.02 |
| -4 | 11  | 1  | 3.44  | 1.15 |
| -4 | -11 | -1 | 4.52  | 1.11 |
| -4 | -11 | -1 | 5.64  | 0.56 |
| -4 | 11  | 1  | 4.55  | 1.04 |
| -4 | -11 | -1 | 3.72  | 0.93 |
| 4  | -11 | 1  | 4.75  | 0.87 |
| -4 | -11 | -1 | 3.93  | 1.05 |
| -4 | -11 | -1 | 4.96  | 0.94 |
| -4 | -11 | -1 | 5.21  | 0.99 |
| -4 | -11 | -1 | 5.92  | 1.02 |
| -4 | -11 | -1 | 4.24  | 1.04 |
| -4 | -11 | 1  | 3.64  | 0.95 |
| -4 | -11 | 1  | 4.52  | 0.93 |
| -4 | -11 | 1  | 4.47  | 1.19 |
| -4 | -11 | 1  | 4.51  | 0.92 |
| -4 | -11 | 1  | 3.22  | 0.88 |
| -4 | 11  | -1 | 4.85  | 1.12 |
| -4 | -11 | 1  | 4.10  | 0.94 |
| -4 | -11 | 1  | 5.58  | 1.27 |
| -4 | -11 | 1  | 4.24  | 1.04 |
| 4  | -11 | -1 | 4.13  | 1.06 |
| -5 | -11 | -1 | 7.26  | 0.95 |
| -5 | 11  | 1  | 6.22  | 1.31 |
| -5 | -11 | -1 | 8.07  | 1.17 |
| -5 | -11 | -1 | 7.25  | 1.23 |
| -5 | -11 | -1 | 11.16 | 1.22 |
| -5 | -11 | -1 | 8.26  | 0.90 |
| -5 | -11 | -1 | 8.01  | 1.02 |
| -5 | -11 | -1 | 8.93  | 1.01 |
| -5 | 11  | 1  | 7.89  | 0.69 |
| -5 | 11  | 1  | 7.44  | 0.94 |
| -5 | 11  | 1  | 9.08  | 0.96 |
| 5  | -11 | 1  | 5.98  | 0.96 |
| -5 | 11  | 1  | 6.89  | 1.15 |
| -5 | -11 | 1  | 9.38  | 0.89 |
| -5 | 11  | -1 | 7.82  | 1.05 |
| -5 | 11  | -1 | 7.26  | 1.28 |
| -5 | 11  | -1 | 8.02  | 0.75 |

## CIF S3

|    |     |    |       |      |
|----|-----|----|-------|------|
| -5 | -11 | 1  | 8.57  | 1.12 |
| -5 | -11 | 1  | 8.36  | 0.96 |
| -5 | -11 | 1  | 6.85  | 1.27 |
| 5  | -11 | -1 | 9.01  | 1.13 |
| -5 | -11 | 1  | 7.52  | 1.48 |
| -5 | -11 | 1  | 9.33  | 0.95 |
| -5 | -11 | 1  | 9.48  | 1.25 |
| -6 | 11  | 1  | 5.22  | 1.03 |
| -6 | 11  | 1  | 5.28  | 0.79 |
| -6 | 11  | 1  | 3.87  | 0.83 |
| -6 | -11 | -1 | 4.22  | 0.83 |
| -6 | -11 | -1 | 5.76  | 1.07 |
| -6 | -11 | -1 | 4.63  | 0.71 |
| -6 | 11  | 1  | 3.74  | 0.92 |
| -6 | -11 | -1 | 3.47  | 0.92 |
| 6  | -11 | 1  | 3.22  | 0.87 |
| -6 | 11  | 1  | 4.74  | 0.84 |
| -6 | -11 | -1 | 3.73  | 0.78 |
| 6  | -11 | -1 | 4.36  | 0.96 |
| -6 | -11 | 1  | 3.36  | 0.70 |
| -6 | 11  | -1 | 4.01  | 0.88 |
| -6 | -11 | 1  | 4.98  | 0.71 |
| -6 | -11 | 1  | 5.59  | 1.11 |
| -6 | -11 | 1  | 5.70  | 0.61 |
| -6 | -11 | 1  | 4.46  | 0.57 |
| -6 | 11  | -1 | 3.98  | 0.85 |
| -6 | -11 | 1  | 3.45  | 0.96 |
| -6 | 11  | -1 | 4.49  | 0.88 |
| -7 | 11  | 1  | -0.45 | 0.46 |
| -7 | -11 | -1 | 0.21  | 0.32 |
| -7 | 11  | 1  | 0.58  | 0.52 |
| -7 | 11  | 1  | 0.11  | 0.39 |
| -7 | -11 | -1 | 0.58  | 0.36 |
| -7 | 11  | 1  | -0.01 | 0.43 |
| -7 | -11 | -1 | 0.15  | 0.23 |
| 7  | -11 | 1  | 0.36  | 0.40 |
| -7 | 11  | 1  | 0.31  | 0.59 |
| -7 | -11 | 1  | 0.46  | 0.27 |
| -7 | -11 | 1  | -0.23 | 0.52 |
| -7 | 11  | -1 | 0.57  | 0.45 |
| 7  | -11 | -1 | -0.55 | 0.47 |

## CIF S3

|    |     |    |       |      |
|----|-----|----|-------|------|
| -7 | 11  | -1 | -0.67 | 0.61 |
| 0  | -12 | 1  | 4.62  | 0.99 |
| 0  | -12 | -1 | 5.19  | 1.12 |
| 0  | -12 | -1 | 2.16  | 1.14 |
| 0  | -12 | -1 | 3.80  | 1.00 |
| 0  | -12 | 1  | 1.54  | 0.90 |
| 0  | -12 | 1  | 1.40  | 0.90 |
| 0  | -12 | 1  | 1.67  | 0.63 |
| 0  | -12 | -1 | 1.65  | 0.60 |
| 0  | -12 | 1  | 4.07  | 1.19 |
| 0  | -12 | 1  | 4.34  | 1.01 |
| -1 | -12 | -1 | 1.39  | 0.61 |
| 1  | -12 | 1  | 1.30  | 0.99 |
| -1 | -12 | -1 | 2.50  | 1.07 |
| 1  | -12 | 1  | 2.12  | 1.14 |
| -1 | -12 | -1 | 2.45  | 0.82 |
| -1 | -12 | -1 | 1.61  | 0.88 |
| -1 | 12  | 1  | 0.62  | 0.81 |
| 1  | -12 | 1  | 0.89  | 0.97 |
| -1 | -12 | -1 | 1.57  | 0.84 |
| 1  | -12 | 1  | 3.89  | 1.39 |
| -1 | -12 | -1 | 2.96  | 0.91 |
| -1 | -12 | 1  | 2.85  | 1.14 |
| -1 | -12 | 1  | 4.71  | 1.18 |
| -1 | -12 | 1  | 1.88  | 0.97 |
| 1  | -12 | -1 | 2.63  | 1.19 |
| -1 | -12 | 1  | 1.26  | 0.87 |
| 1  | -12 | -1 | 1.12  | 0.98 |
| -1 | -12 | 1  | 1.63  | 0.80 |
| -1 | -12 | 1  | 2.12  | 0.91 |
| 1  | -12 | -1 | 1.91  | 1.14 |
| 2  | -12 | 1  | 5.13  | 1.47 |
| -2 | 12  | 1  | 3.83  | 1.03 |
| -2 | -12 | -1 | 5.46  | 1.16 |
| -2 | -12 | -1 | 2.86  | 0.78 |
| 2  | -12 | 1  | 5.54  | 1.10 |
| -2 | -12 | -1 | 5.35  | 1.23 |
| -2 | -12 | -1 | 3.72  | 0.88 |
| -2 | -12 | -1 | 2.53  | 0.82 |
| -2 | -12 | -1 | 3.82  | 0.93 |
| -2 | -12 | 1  | 3.67  | 0.94 |

## CIF S3

|    |     |    |      |      |
|----|-----|----|------|------|
| 2  | -12 | -1 | 2.12 | 1.26 |
| -2 | -12 | 1  | 3.70 | 1.11 |
| -2 | -12 | 1  | 2.86 | 0.83 |
| 2  | -12 | -1 | 5.38 | 1.36 |
| -2 | -12 | 1  | 3.84 | 0.79 |
| -2 | -12 | 1  | 4.31 | 1.12 |
| -2 | -12 | 1  | 3.52 | 0.84 |
| -2 | -12 | 1  | 3.70 | 0.96 |
| -3 | -12 | -1 | 3.57 | 0.99 |
| -3 | -12 | -1 | 4.39 | 1.16 |
| -3 | -12 | -1 | 5.00 | 1.04 |
| -3 | -12 | -1 | 2.86 | 0.64 |
| -3 | -12 | -1 | 1.55 | 0.90 |
| -3 | -12 | -1 | 3.69 | 0.81 |
| 3  | -12 | 1  | 3.62 | 1.63 |
| -3 | -12 | -1 | 3.85 | 0.97 |
| -3 | -12 | 1  | 4.21 | 0.98 |
| -3 | -12 | 1  | 3.58 | 0.96 |
| -3 | -12 | 1  | 3.18 | 0.64 |
| -3 | -12 | 1  | 2.61 | 0.98 |
| 3  | -12 | -1 | 3.47 | 0.75 |
| -3 | -12 | 1  | 4.17 | 1.11 |
| -3 | -12 | 1  | 3.97 | 0.95 |
| -3 | -12 | 1  | 3.10 | 0.76 |
| -3 | -12 | 1  | 2.12 | 0.83 |
| -4 | 12  | 1  | 3.10 | 0.73 |
| -4 | -12 | -1 | 1.94 | 0.66 |
| -4 | 12  | 1  | 3.51 | 1.01 |
| -4 | -12 | -1 | 1.87 | 0.85 |
| -4 | -12 | -1 | 0.85 | 0.64 |
| -4 | -12 | -1 | 2.40 | 0.68 |
| -4 | -12 | -1 | 3.60 | 0.87 |
| -4 | -12 | -1 | 4.07 | 0.90 |
| -4 | -12 | -1 | 1.40 | 0.86 |
| -4 | -12 | 1  | 4.20 | 0.86 |
| -4 | -12 | 1  | 1.70 | 0.79 |
| 4  | -12 | -1 | 2.37 | 0.71 |
| 4  | -12 | -1 | 3.44 | 0.99 |
| -4 | -12 | 1  | 3.04 | 0.93 |
| -4 | -12 | 1  | 2.48 | 0.71 |
| -4 | -12 | 1  | 3.17 | 0.81 |

## CIF S3

|    |     |    |       |      |
|----|-----|----|-------|------|
| -4 | -12 | 1  | 3.90  | 0.87 |
| -4 | 12  | -1 | 1.87  | 1.19 |
| -4 | -12 | 1  | 4.13  | 0.93 |
| -5 | -12 | -1 | 2.64  | 0.69 |
| -5 | 12  | 1  | 2.96  | 0.85 |
| -5 | -12 | -1 | 3.87  | 0.80 |
| -5 | 12  | 1  | 3.74  | 0.93 |
| -5 | 12  | 1  | 3.54  | 0.48 |
| -5 | 12  | 1  | 2.88  | 0.84 |
| -5 | -12 | -1 | 4.24  | 1.00 |
| -5 | -12 | -1 | 4.73  | 1.10 |
| -5 | -12 | -1 | 3.12  | 0.83 |
| -5 | 12  | -1 | 3.35  | 0.51 |
| -5 | -12 | 1  | 2.51  | 0.77 |
| -5 | -12 | 1  | 3.18  | 0.55 |
| -5 | 12  | -1 | 2.51  | 0.72 |
| -5 | 12  | -1 | 4.19  | 1.09 |
| 5  | -12 | -1 | 2.08  | 0.49 |
| -5 | -12 | 1  | 2.04  | 0.47 |
| -5 | -12 | 1  | 4.54  | 1.05 |
| -5 | -12 | 1  | 2.46  | 0.54 |
| -6 | -12 | -1 | 0.08  | 0.35 |
| -6 | -12 | -1 | -0.53 | 0.41 |
| -6 | -12 | -1 | 0.95  | 0.62 |
| -6 | -12 | -1 | 0.33  | 0.36 |
| -6 | 12  | 1  | 0.16  | 0.44 |
| -6 | 12  | 1  | 0.16  | 0.62 |
| -6 | 12  | 1  | 0.13  | 0.52 |
| -6 | -12 | 1  | 0.17  | 0.38 |
| -6 | -12 | 1  | -0.57 | 0.56 |
| -6 | 12  | -1 | 1.40  | 0.68 |
| -6 | 12  | -1 | 0.10  | 0.50 |
| -6 | -12 | 1  | 0.00  | 0.27 |
| 6  | -12 | -1 | 0.12  | 0.39 |
| -6 | -12 | 1  | 0.03  | 0.32 |
| -7 | -12 | -1 | 1.51  | 0.39 |
| -7 | 12  | 1  | 2.44  | 0.67 |
| -7 | 12  | 1  | 1.82  | 0.43 |
| -7 | -12 | -1 | 1.93  | 0.34 |
| -7 | 12  | 1  | 1.39  | 0.48 |
| -7 | 12  | -1 | 1.15  | 0.25 |



## CIF S3

|    |     |    |      |      |
|----|-----|----|------|------|
| -7 | 12  | -1 | 0.95 | 0.33 |
| -7 | -12 | 1  | 1.36 | 0.31 |
| -7 | -12 | 1  | 1.38 | 0.30 |
| -7 | 12  | -1 | 0.78 | 0.38 |
| 0  | -13 | 1  | 1.34 | 0.97 |
| 0  | -13 | 1  | 0.36 | 0.48 |
| 0  | -13 | 1  | 0.67 | 1.01 |
| 0  | -13 | -1 | 0.57 | 0.44 |
| 0  | -13 | 1  | 2.18 | 0.81 |
| 0  | -13 | -1 | 1.63 | 0.87 |
| 0  | -13 | -1 | 2.18 | 1.09 |
| 0  | -13 | 1  | 1.15 | 0.85 |
| 1  | -13 | 1  | 4.03 | 0.99 |
| 1  | -13 | 1  | 2.14 | 0.93 |
| -1 | -13 | -1 | 5.69 | 1.52 |
| -1 | -13 | -1 | 4.90 | 1.27 |
| 1  | -13 | 1  | 5.80 | 1.55 |
| -1 | -13 | -1 | 4.63 | 1.15 |
| 1  | -13 | 1  | 5.31 | 1.13 |
| -1 | -13 | -1 | 5.99 | 1.08 |
| -1 | -13 | -1 | 3.38 | 0.88 |
| -1 | -13 | 1  | 4.58 | 1.06 |
| 1  | -13 | -1 | 3.07 | 1.08 |
| -1 | -13 | 1  | 4.02 | 1.15 |
| -1 | -13 | 1  | 4.00 | 1.43 |
| -1 | -13 | 1  | 0.73 | 0.85 |
| -1 | -13 | 1  | 4.44 | 0.94 |
| -1 | -13 | 1  | 3.72 | 1.03 |
| 1  | -13 | -1 | 4.91 | 1.38 |
| -2 | -13 | -1 | 0.18 | 0.53 |
| -2 | -13 | -1 | 0.31 | 0.74 |
| -2 | -13 | -1 | 1.26 | 0.77 |
| -2 | -13 | -1 | 0.21 | 0.77 |
| -2 | -13 | -1 | 0.40 | 0.99 |
| 2  | -13 | 1  | 0.19 | 0.98 |
| -2 | -13 | -1 | 0.69 | 1.22 |
| -2 | -13 | -1 | 0.93 | 0.65 |
| -2 | -13 | 1  | 0.83 | 0.57 |
| -2 | -13 | 1  | 0.49 | 0.83 |
| -2 | -13 | 1  | 0.20 | 0.71 |
| -2 | -13 | 1  | 0.18 | 0.69 |

## CIF S3

|    |     |    |       |      |
|----|-----|----|-------|------|
| -2 | -13 | 1  | 0.11  | 0.63 |
| -2 | -13 | 1  | 0.41  | 0.82 |
| -2 | -13 | 1  | 0.34  | 0.74 |
| -2 | -13 | 1  | -0.07 | 0.80 |
| 2  | -13 | -1 | 1.40  | 1.02 |
| -2 | -13 | 1  | 1.65  | 0.66 |
| -2 | -13 | 1  | 0.00  | 0.91 |
| -3 | -13 | -1 | 4.97  | 1.62 |
| -3 | -13 | -1 | 3.42  | 0.85 |
| -3 | -13 | -1 | 0.74  | 0.68 |
| -3 | -13 | -1 | 3.97  | 0.90 |
| -3 | -13 | -1 | 2.28  | 0.70 |
| -3 | -13 | -1 | 4.59  | 0.63 |
| 3  | -13 | 1  | 2.91  | 1.01 |
| -3 | -13 | 1  | 4.09  | 0.88 |
| -3 | -13 | 1  | 4.45  | 0.99 |
| -3 | -13 | 1  | 2.73  | 0.71 |
| -3 | -13 | 1  | 3.96  | 0.92 |
| -3 | -13 | 1  | 2.73  | 0.69 |
| -3 | -13 | 1  | 5.17  | 1.05 |
| 3  | -13 | -1 | 5.35  | 1.55 |
| -4 | -13 | -1 | 5.94  | 0.99 |
| -4 | -13 | -1 | 4.84  | 0.89 |
| -4 | -13 | -1 | 5.06  | 1.22 |
| -4 | 13  | 1  | 6.01  | 1.10 |
| -4 | 13  | 1  | 5.09  | 0.57 |
| -4 | -13 | -1 | 4.00  | 0.77 |
| -4 | -13 | -1 | 5.30  | 0.83 |
| -4 | -13 | 1  | 5.56  | 0.82 |
| -4 | -13 | 1  | 5.28  | 0.77 |
| -4 | -13 | 1  | 5.00  | 0.98 |
| -4 | -13 | 1  | 5.66  | 0.92 |
| -4 | 13  | -1 | 3.71  | 0.68 |
| -5 | -13 | -1 | 1.88  | 0.60 |
| -5 | -13 | -1 | 2.69  | 0.64 |
| -5 | -13 | -1 | 3.52  | 0.86 |
| -5 | -13 | -1 | 1.41  | 0.47 |
| -5 | 13  | 1  | 1.25  | 0.55 |
| -5 | 13  | 1  | 2.08  | 0.65 |
| -5 | -13 | 1  | 3.31  | 0.89 |
| -5 | -13 | 1  | 1.36  | 0.37 |

## CIF S3

|    |     |    |       |      |
|----|-----|----|-------|------|
| -5 | -13 | 1  | 2.68  | 0.55 |
| -5 | -13 | 1  | 3.07  | 0.60 |
| -5 | 13  | -1 | 2.39  | 0.72 |
| -6 | 13  | 1  | 1.81  | 0.39 |
| -6 | -13 | -1 | 1.78  | 0.46 |
| -6 | -13 | -1 | 2.21  | 0.33 |
| -6 | 13  | 1  | 2.53  | 0.70 |
| -6 | -13 | 1  | 0.96  | 0.27 |
| -6 | 13  | -1 | 0.89  | 0.51 |
| -6 | -13 | 1  | 2.01  | 0.46 |
| -6 | 13  | -1 | 1.44  | 0.39 |
| 0  | -14 | -1 | -0.57 | 0.83 |
| 0  | -14 | -1 | 1.20  | 0.87 |
| 0  | -14 | 1  | -0.12 | 0.66 |
| 0  | -14 | 1  | -0.36 | 0.80 |
| 0  | -14 | 1  | 0.33  | 0.64 |
| 0  | -14 | 1  | 0.48  | 0.38 |
| 0  | -14 | 1  | 0.77  | 0.88 |
| 0  | -14 | 1  | 0.64  | 0.70 |
| 0  | -14 | -1 | -0.20 | 0.83 |
| 0  | -14 | -1 | 1.46  | 0.74 |
| 1  | -14 | 1  | 2.26  | 0.85 |
| -1 | -14 | -1 | 3.80  | 0.95 |
| 1  | -14 | 1  | 2.27  | 0.87 |
| -1 | -14 | -1 | 2.88  | 1.11 |
| -1 | -14 | -1 | 2.04  | 1.03 |
| 1  | -14 | 1  | 0.70  | 0.70 |
| -1 | -14 | -1 | 1.92  | 0.86 |
| -1 | -14 | -1 | 1.24  | 0.72 |
| -1 | -14 | -1 | 1.41  | 0.79 |
| -1 | -14 | -1 | 1.43  | 0.64 |
| -1 | -14 | 1  | 2.66  | 0.75 |
| -1 | -14 | 1  | 2.45  | 0.84 |
| 1  | -14 | -1 | 0.91  | 0.84 |
| 1  | -14 | -1 | 1.16  | 0.81 |
| -1 | -14 | 1  | 3.46  | 1.16 |
| -1 | -14 | 1  | 2.48  | 0.70 |
| -1 | -14 | 1  | 1.87  | 0.78 |
| -1 | -14 | 1  | 0.26  | 0.64 |
| -2 | -14 | -1 | -0.35 | 0.69 |
| 2  | -14 | 1  | -0.29 | 0.80 |

## CIF S3

|    |     |    |       |      |
|----|-----|----|-------|------|
| -2 | -14 | -1 | 0.29  | 0.47 |
| 2  | -14 | 1  | 0.26  | 0.80 |
| -2 | -14 | -1 | -0.07 | 0.45 |
| -2 | -14 | -1 | 0.26  | 0.64 |
| -2 | -14 | -1 | 0.20  | 0.60 |
| -2 | -14 | -1 | -0.02 | 0.75 |
| -2 | -14 | -1 | 1.17  | 0.66 |
| -2 | -14 | 1  | 0.67  | 0.71 |
| -2 | -14 | 1  | -0.16 | 0.66 |
| -2 | -14 | 1  | 0.09  | 0.50 |
| -2 | -14 | 1  | -0.48 | 0.75 |
| 2  | -14 | -1 | 1.29  | 0.82 |
| -2 | -14 | 1  | 0.20  | 0.47 |
| -2 | -14 | 1  | -0.23 | 0.63 |
| -2 | -14 | 1  | 0.23  | 0.59 |
| -3 | -14 | -1 | -0.08 | 0.42 |
| -3 | 14  | 1  | -0.01 | 0.47 |
| -3 | -14 | -1 | -0.20 | 0.55 |
| -3 | -14 | -1 | -0.03 | 0.63 |
| -3 | -14 | -1 | 0.12  | 0.48 |
| 3  | -14 | 1  | 0.07  | 0.87 |
| -3 | -14 | -1 | 0.28  | 0.57 |
| -3 | -14 | -1 | -0.18 | 0.53 |
| -3 | -14 | 1  | 0.58  | 0.57 |
| -3 | -14 | 1  | 0.71  | 0.49 |
| -3 | -14 | 1  | -0.13 | 0.49 |
| -3 | -14 | 1  | -0.03 | 0.66 |
| -3 | -14 | 1  | 0.26  | 0.69 |
| -3 | -14 | 1  | -0.35 | 0.43 |
| -4 | -14 | -1 | 0.83  | 0.42 |
| -4 | 14  | 1  | 1.58  | 0.62 |
| -4 | -14 | -1 | 0.51  | 0.36 |
| -4 | -14 | -1 | 0.88  | 0.46 |
| -4 | -14 | -1 | 0.70  | 0.39 |
| -4 | -14 | 1  | 0.91  | 0.40 |
| -4 | -14 | 1  | 0.08  | 0.38 |
| -4 | -14 | 1  | 1.23  | 0.39 |
| -4 | -14 | 1  | 1.63  | 0.61 |
| -4 | 14  | -1 | 0.79  | 0.27 |
| 0  | -15 | -1 | -0.10 | 0.60 |
| 0  | -15 | -1 | 0.11  | 0.54 |

## CIF S3

|    |     |    |       |      |
|----|-----|----|-------|------|
| 0  | -15 | -1 | 0.05  | 0.64 |
| 0  | -15 | 1  | 0.38  | 0.54 |
| 0  | -15 | -1 | -0.38 | 0.61 |
| 0  | -15 | 1  | -0.05 | 0.60 |
| 0  | -15 | 1  | 0.82  | 0.64 |
| 0  | -15 | 1  | -0.29 | 0.47 |
| 1  | -15 | 1  | 1.02  | 0.58 |
| -1 | -15 | -1 | 1.25  | 0.51 |
| 1  | -15 | 1  | 0.53  | 0.60 |
| -1 | -15 | -1 | 1.25  | 0.62 |
| -1 | -15 | -1 | 1.84  | 0.46 |
| -1 | -15 | -1 | 1.35  | 0.61 |
| 1  | -15 | 1  | 0.92  | 0.62 |
| 1  | -15 | -1 | 2.61  | 0.80 |
| -1 | -15 | 1  | 0.70  | 0.60 |
| 1  | -15 | -1 | 0.62  | 0.62 |
| -1 | -15 | 1  | 1.25  | 0.56 |
| -1 | -15 | 1  | 1.01  | 0.48 |
| -2 | -15 | -1 | 0.36  | 0.50 |
| -2 | -15 | -1 | 0.80  | 0.42 |
| -2 | -15 | -1 | 1.11  | 0.54 |
| 2  | -15 | 1  | 0.58  | 0.57 |
| -2 | -15 | -1 | 2.58  | 0.97 |
| -2 | -15 | -1 | 0.75  | 0.63 |
| 2  | -15 | 1  | 0.52  | 0.55 |
| -2 | -15 | 1  | 0.84  | 0.43 |
| -2 | -15 | 1  | 0.67  | 0.42 |
| -2 | -15 | 1  | 0.77  | 0.32 |
| -2 | -15 | 1  | 0.62  | 0.48 |
| 2  | -15 | -1 | 1.18  | 0.60 |
| -2 | -15 | 1  | 0.77  | 0.40 |
| -3 | -15 | -1 | 3.21  | 0.75 |
| -3 | -15 | -1 | 2.87  | 0.53 |
| -3 | -15 | -1 | 1.97  | 0.51 |
| -3 | 15  | 1  | 2.19  | 0.34 |
| -3 | -15 | -1 | 2.87  | 0.58 |
| -3 | -15 | 1  | 1.48  | 0.40 |
| -3 | 15  | -1 | 2.30  | 0.38 |
| -3 | -15 | 1  | 1.06  | 0.41 |
| -3 | -15 | 1  | 2.75  | 0.51 |
| -3 | -15 | 1  | 3.57  | 0.74 |

## CIF S3

|    |   |    |        |       |
|----|---|----|--------|-------|
| 0  | 0 | 2  | 32.82  | 1.64  |
| 0  | 0 | 2  | 27.82  | 1.70  |
| 0  | 0 | 2  | 27.76  | 1.66  |
| 0  | 0 | -2 | 30.90  | 1.66  |
| 0  | 0 | 2  | 33.48  | 1.67  |
| 0  | 0 | -2 | 34.78  | 1.66  |
| 1  | 0 | 2  | 594.45 | 31.19 |
| -1 | 0 | -2 | 714.79 | 31.21 |
| -1 | 0 | 2  | 642.53 | 31.06 |
| -1 | 0 | -2 | 625.42 | 31.16 |
| 1  | 0 | -2 | 608.55 | 31.07 |
| -1 | 0 | 2  | 668.38 | 31.05 |
| -1 | 0 | -2 | 640.62 | 31.15 |
| 1  | 0 | 2  | 646.57 | 31.18 |
| -1 | 0 | 2  | 643.08 | 31.05 |
| -1 | 0 | -2 | 608.88 | 31.14 |
| 1  | 0 | 2  | 652.16 | 31.16 |
| -1 | 0 | -2 | 636.08 | 31.13 |
| -2 | 0 | 2  | 1.63   | 0.36  |
| -2 | 0 | -2 | 1.70   | 0.57  |
| -2 | 0 | -2 | 1.68   | 0.52  |
| -2 | 0 | 2  | 2.13   | 0.35  |
| -2 | 0 | -2 | 2.72   | 0.73  |
| 2  | 0 | 2  | 1.34   | 0.62  |
| -2 | 0 | -2 | 2.32   | 0.60  |
| -2 | 0 | -2 | 1.43   | 0.55  |
| 2  | 0 | -2 | 1.99   | 0.26  |
| 2  | 0 | 2  | 2.32   | 0.88  |
| 3  | 0 | 2  | 142.17 | 6.65  |
| -3 | 0 | 2  | 130.53 | 6.37  |
| 3  | 0 | 2  | 131.10 | 6.72  |
| -3 | 0 | -2 | 135.66 | 6.55  |
| 3  | 0 | -2 | 126.53 | 6.41  |
| -3 | 0 | 2  | 117.89 | 6.39  |
| -3 | 0 | 2  | 125.41 | 6.38  |
| -4 | 0 | 2  | 0.65   | 0.34  |
| 4  | 0 | -2 | 0.15   | 0.32  |
| -4 | 0 | 2  | -0.10  | 0.34  |
| -4 | 0 | 2  | 0.01   | 0.29  |
| -4 | 0 | -2 | 0.21   | 0.48  |
| 4  | 0 | -2 | 0.00   | 0.14  |

## CIF S3

|    |   |    |       |      |
|----|---|----|-------|------|
| 4  | 0 | -2 | 0.36  | 0.32 |
| 4  | 0 | 2  | 0.72  | 0.68 |
| -4 | 0 | -2 | 0.17  | 0.49 |
| -4 | 0 | -2 | -0.40 | 0.43 |
| -4 | 0 | 2  | 0.04  | 0.33 |
| 4  | 0 | 2  | 0.48  | 0.80 |
| -4 | 0 | -2 | -0.14 | 0.40 |
| 4  | 0 | 2  | -0.33 | 0.40 |
| 4  | 0 | -2 | 0.33  | 0.17 |
| -4 | 0 | -2 | 0.65  | 0.58 |
| -5 | 0 | 2  | 43.72 | 2.25 |
| 5  | 0 | 2  | 41.30 | 2.74 |
| 5  | 0 | 2  | 50.15 | 2.42 |
| -5 | 0 | 2  | 43.68 | 2.42 |
| 5  | 0 | -2 | 46.14 | 2.37 |
| -5 | 0 | 2  | 45.98 | 2.29 |
| -5 | 0 | -2 | 46.41 | 2.30 |
| -5 | 0 | -2 | 47.69 | 2.57 |
| -5 | 0 | -2 | 45.34 | 2.46 |
| -5 | 0 | 2  | 39.12 | 2.29 |
| -5 | 0 | -2 | 46.86 | 2.67 |
| 5  | 0 | -2 | 47.18 | 2.29 |
| -5 | 0 | -2 | 46.32 | 2.32 |
| 5  | 0 | -2 | 45.54 | 2.29 |
| -6 | 0 | -2 | 0.84  | 0.58 |
| -6 | 0 | -2 | 1.24  | 0.37 |
| 6  | 0 | 2  | 0.71  | 0.51 |
| -6 | 0 | 2  | 0.75  | 0.27 |
| -6 | 0 | -2 | 0.90  | 0.34 |
| -6 | 0 | 2  | 0.83  | 0.31 |
| 7  | 0 | 2  | 3.83  | 0.72 |
| -7 | 0 | -2 | 2.64  | 0.61 |
| -7 | 0 | -2 | 2.19  | 0.57 |
| -7 | 0 | 2  | 3.50  | 0.47 |
| -7 | 0 | -2 | 4.17  | 0.83 |
| -7 | 0 | 2  | 3.43  | 0.49 |
| -8 | 0 | 2  | 3.59  | 0.55 |
| -8 | 0 | -2 | 3.68  | 0.73 |
| -8 | 0 | 2  | 3.31  | 0.53 |
| -9 | 0 | -2 | 2.24  | 0.52 |
| -9 | 0 | 2  | 3.64  | 0.82 |

## CIF S3

|     |    |    |        |       |
|-----|----|----|--------|-------|
| -9  | 0  | -2 | 3.97   | 0.63  |
| -9  | 0  | -2 | 3.31   | 0.84  |
| -9  | 0  | -2 | 3.94   | 0.56  |
| -9  | 0  | 2  | 2.46   | 0.40  |
| -9  | 0  | -2 | 2.95   | 0.49  |
| -9  | 0  | -2 | 2.19   | 0.51  |
| -10 | 0  | 2  | -0.23  | 0.48  |
| -10 | 0  | -2 | -0.04  | 0.37  |
| -10 | 0  | 2  | 0.00   | 0.11  |
| -10 | 0  | -2 | -0.25  | 0.41  |
| -10 | 0  | -2 | -0.61  | 0.36  |
| -10 | 0  | 2  | -0.02  | 0.12  |
| 0   | -1 | -2 | 865.55 | 42.74 |
| 0   | -1 | 2  | 851.95 | 42.75 |
| 0   | 1  | -2 | 890.05 | 42.75 |
| 0   | -1 | 2  | 823.96 | 42.73 |
| 0   | -1 | 2  | 875.56 | 42.73 |
| 0   | 1  | -2 | 824.50 | 42.82 |
| 0   | 1  | 2  | 976.46 | 42.80 |
| 0   | -1 | -2 | 886.82 | 42.78 |
| 0   | -1 | 2  | 874.43 | 42.76 |
| 0   | 1  | -2 | 935.84 | 42.75 |
| 0   | -1 | -2 | 891.11 | 42.81 |
| 0   | 1  | 2  | 889.85 | 42.80 |
| 0   | 1  | 2  | 855.06 | 42.74 |
| 1   | -1 | 2  | 351.72 | 16.97 |
| 1   | -1 | 2  | 358.85 | 17.01 |
| -1  | 1  | 2  | 373.14 | 16.91 |
| -1  | 1  | 2  | 347.39 | 16.91 |
| -1  | -1 | -2 | 384.58 | 16.99 |
| -1  | -1 | -2 | 325.21 | 16.97 |
| -1  | 1  | 2  | 378.61 | 16.94 |
| 1   | 1  | -2 | 334.53 | 16.86 |
| -1  | -1 | -2 | 347.80 | 16.94 |
| -1  | -1 | -2 | 343.89 | 16.98 |
| -1  | 1  | 2  | 324.38 | 16.93 |
| 1   | -1 | 2  | 324.52 | 16.99 |
| -1  | 1  | 2  | 356.81 | 16.93 |
| 1   | 1  | -2 | 341.76 | 16.86 |
| -1  | -1 | -2 | 350.79 | 17.02 |
| 1   | -1 | -2 | 336.57 | 16.93 |



## CIF S3

|    |    |    |        |       |
|----|----|----|--------|-------|
| -1 | 1  | -2 | 346.55 | 16.95 |
| 1  | 1  | 2  | 338.06 | 17.03 |
| -1 | -1 | 2  | 355.39 | 16.85 |
| -1 | 1  | -2 | 334.85 | 16.97 |
| 1  | 1  | 2  | 337.99 | 17.00 |
| -1 | 1  | -2 | 336.66 | 17.00 |
| -1 | 1  | -2 | 344.34 | 16.98 |
| -1 | -1 | 2  | 340.61 | 16.85 |
| -1 | -1 | 2  | 346.78 | 16.91 |
| 1  | 1  | 2  | 356.97 | 17.03 |
| -2 | -1 | -2 | 27.21  | 1.58  |
| -2 | -1 | -2 | 24.96  | 1.56  |
| 2  | -1 | 2  | 23.75  | 1.66  |
| -2 | 1  | 2  | 27.72  | 1.43  |
| -2 | -1 | -2 | 25.05  | 1.48  |
| 2  | -1 | 2  | 25.28  | 1.70  |
| -2 | -1 | -2 | 25.26  | 1.55  |
| -2 | -1 | -2 | 27.57  | 1.67  |
| -2 | 1  | 2  | 26.17  | 1.45  |
| -2 | -1 | -2 | 25.02  | 1.60  |
| -2 | 1  | -2 | 24.00  | 1.60  |
| -2 | 1  | -2 | 23.72  | 1.56  |
| -2 | 1  | -2 | 24.75  | 1.80  |
| 2  | 1  | 2  | 23.82  | 1.63  |
| 2  | 1  | 2  | 28.42  | 1.75  |
| -2 | -1 | 2  | 24.41  | 1.46  |
| -2 | 1  | -2 | 24.31  | 1.57  |
| -2 | 1  | -2 | 26.32  | 1.61  |
| 2  | -1 | -2 | 23.99  | 1.27  |
| 2  | -1 | -2 | 25.08  | 1.49  |
| 2  | -1 | -2 | 26.15  | 1.44  |
| -3 | -1 | -2 | 369.96 | 16.75 |
| -3 | 1  | 2  | 328.17 | 16.64 |
| 3  | -1 | 2  | 327.58 | 16.86 |
| -3 | -1 | -2 | 331.66 | 16.72 |
| 3  | -1 | 2  | 353.16 | 16.84 |
| -3 | 1  | 2  | 318.18 | 16.55 |
| 3  | -1 | 2  | 318.26 | 16.59 |
| -3 | 1  | 2  | 331.08 | 16.63 |
| -3 | 1  | -2 | 366.30 | 16.78 |
| 3  | -1 | -2 | 336.03 | 16.52 |

## CIF S3

|    |    |    |        |       |
|----|----|----|--------|-------|
| 3  | -1 | -2 | 340.60 | 16.52 |
| 3  | 1  | 2  | 343.56 | 16.81 |
| 3  | 1  | 2  | 353.82 | 16.93 |
| 3  | -1 | -2 | 355.74 | 16.58 |
| 3  | 1  | 2  | 344.36 | 16.62 |
| -3 | -1 | 2  | 341.65 | 16.53 |
| -3 | 1  | -2 | 331.06 | 16.75 |
| -3 | -1 | 2  | 336.41 | 16.54 |
| -3 | 1  | -2 | 317.24 | 16.80 |
| -3 | 1  | -2 | 358.15 | 16.81 |
| -4 | -1 | -2 | 68.21  | 3.38  |
| -4 | -1 | -2 | 58.79  | 3.26  |
| 4  | -1 | 2  | 68.47  | 3.77  |
| -4 | -1 | -2 | 62.94  | 3.21  |
| 4  | -1 | 2  | 62.89  | 3.65  |
| -4 | -1 | -2 | 67.39  | 3.50  |
| -4 | 1  | 2  | 60.22  | 3.22  |
| -4 | 1  | 2  | 66.97  | 3.26  |
| 4  | -1 | 2  | 64.77  | 3.29  |
| -4 | -1 | -2 | 61.28  | 3.26  |
| -4 | -1 | -2 | 65.15  | 3.30  |
| -4 | 1  | 2  | 67.70  | 3.38  |
| -4 | -1 | 2  | 64.89  | 3.25  |
| -4 | 1  | -2 | 62.38  | 3.36  |
| 4  | 1  | 2  | 62.62  | 3.27  |
| 4  | -1 | -2 | 66.62  | 3.21  |
| -4 | -1 | 2  | 66.33  | 3.24  |
| -4 | 1  | -2 | 65.14  | 3.53  |
| 4  | -1 | -2 | 68.22  | 3.28  |
| -4 | -1 | 2  | 64.18  | 3.15  |
| 4  | -1 | -2 | 63.28  | 3.20  |
| -4 | 1  | -2 | 57.77  | 3.47  |
| -4 | 1  | -2 | 58.10  | 3.49  |
| 4  | 1  | 2  | 65.77  | 3.59  |
| 4  | -1 | -2 | 67.08  | 3.25  |
| -4 | 1  | -2 | 63.25  | 3.34  |
| -4 | -1 | 2  | 66.31  | 3.15  |
| 4  | 1  | 2  | 69.41  | 4.06  |
| -5 | 1  | 2  | 56.43  | 2.79  |
| -5 | 1  | 2  | 52.93  | 3.03  |
| -5 | -1 | -2 | 55.74  | 2.96  |

## CIF S3

|    |    |    |       |      |
|----|----|----|-------|------|
| 5  | -1 | 2  | 61.64 | 2.96 |
| -5 | -1 | -2 | 58.53 | 2.84 |
| -5 | -1 | -2 | 54.99 | 2.83 |
| -5 | 1  | 2  | 55.58 | 2.88 |
| 5  | 1  | -2 | 57.60 | 2.80 |
| -5 | -1 | -2 | 55.92 | 3.18 |
| -5 | -1 | -2 | 53.79 | 2.86 |
| -5 | 1  | -2 | 55.83 | 3.22 |
| -5 | 1  | -2 | 58.26 | 3.00 |
| 5  | 1  | 2  | 58.31 | 2.93 |
| 5  | 1  | 2  | 52.94 | 3.24 |
| 5  | -1 | -2 | 56.12 | 2.85 |
| -5 | -1 | 2  | 53.71 | 2.88 |
| -5 | 1  | -2 | 59.38 | 2.88 |
| -5 | -1 | 2  | 56.58 | 2.77 |
| -5 | 1  | -2 | 55.52 | 2.84 |
| 5  | -1 | -2 | 58.90 | 2.95 |
| 5  | -1 | -2 | 56.02 | 2.89 |
| -5 | -1 | 2  | 52.92 | 2.88 |
| -6 | -1 | -2 | 30.65 | 1.66 |
| -6 | -1 | -2 | 30.59 | 1.82 |
| -6 | 1  | 2  | 30.52 | 1.63 |
| -6 | 1  | 2  | 32.43 | 1.63 |
| 6  | -1 | 2  | 33.02 | 1.82 |
| -6 | -1 | -2 | 30.39 | 1.66 |
| -6 | -1 | -2 | 30.35 | 1.65 |
| -6 | 1  | 2  | 31.32 | 1.67 |
| -6 | -1 | 2  | 31.75 | 1.59 |
| -6 | -1 | 2  | 29.93 | 1.60 |
| 6  | -1 | -2 | 33.25 | 1.74 |
| -6 | 1  | -2 | 30.29 | 1.89 |
| -6 | 1  | -2 | 30.71 | 1.68 |
| 6  | 1  | 2  | 31.01 | 1.79 |
| -7 | 1  | 2  | 4.14  | 0.52 |
| -7 | -1 | -2 | 3.94  | 0.60 |
| -7 | -1 | -2 | 3.85  | 0.58 |
| -7 | -1 | -2 | 3.80  | 0.50 |
| -7 | 1  | 2  | 3.74  | 0.57 |
| 7  | -1 | 2  | 3.73  | 0.78 |
| -7 | -1 | -2 | 4.39  | 0.81 |
| -7 | -1 | 2  | 4.01  | 0.49 |

## CIF S3

|     |    |    |        |      |
|-----|----|----|--------|------|
| 7   | 1  | 2  | 2.85   | 0.66 |
| -7  | 1  | -2 | 3.65   | 0.63 |
| -7  | -1 | 2  | 4.26   | 0.51 |
| -7  | 1  | -2 | 3.86   | 0.86 |
| -7  | 1  | -2 | 3.08   | 0.68 |
| -8  | 1  | 2  | 9.69   | 0.75 |
| -8  | -1 | -2 | 9.88   | 1.08 |
| -8  | -1 | -2 | 9.83   | 0.85 |
| -8  | 1  | 2  | 8.75   | 0.78 |
| -8  | 1  | -2 | 8.37   | 0.90 |
| -8  | -1 | 2  | 8.67   | 0.67 |
| -9  | 1  | 2  | 3.19   | 0.53 |
| -9  | -1 | -2 | 2.57   | 0.51 |
| -9  | 1  | 2  | 2.30   | 0.44 |
| -9  | -1 | -2 | 3.08   | 0.86 |
| -9  | -1 | -2 | 2.83   | 0.53 |
| -9  | -1 | -2 | 1.78   | 0.46 |
| -9  | 1  | 2  | 2.61   | 0.60 |
| -9  | -1 | -2 | 2.97   | 0.65 |
| -9  | -1 | -2 | 2.38   | 0.57 |
| -9  | 1  | -2 | 2.68   | 0.54 |
| -9  | 1  | -2 | 3.37   | 0.65 |
| -9  | 1  | -2 | 3.46   | 0.68 |
| -9  | 1  | -2 | 2.83   | 0.56 |
| -9  | 1  | -2 | 3.02   | 0.58 |
| -9  | 1  | -2 | 2.74   | 0.47 |
| -9  | -1 | 2  | 2.65   | 0.37 |
| -9  | -1 | 2  | 3.46   | 0.82 |
| -10 | 1  | 2  | 1.20   | 0.26 |
| -10 | 1  | 2  | 1.51   | 0.27 |
| -10 | 1  | 2  | 1.40   | 0.50 |
| -10 | 1  | -2 | 1.33   | 0.32 |
| -10 | 1  | -2 | 1.79   | 0.52 |
| -10 | 1  | -2 | 1.20   | 0.40 |
| -10 | -1 | 2  | 0.94   | 0.43 |
| -10 | 1  | -2 | 1.72   | 0.33 |
| -11 | 1  | -2 | 6.03   | 0.36 |
| -11 | 1  | -2 | 6.09   | 0.36 |
| 0   | 2  | 2  | 108.75 | 5.33 |
| 0   | -2 | -2 | 103.38 | 5.34 |
| 0   | -2 | -2 | 104.39 | 5.33 |

## CIF S3

|    |    |    |        |      |
|----|----|----|--------|------|
| 0  | -2 | 2  | 109.92 | 5.33 |
| 0  | 2  | -2 | 102.81 | 5.33 |
| 0  | 2  | 2  | 104.82 | 5.41 |
| 0  | -2 | 2  | 98.43  | 5.31 |
| 0  | 2  | 2  | 109.94 | 5.38 |
| 0  | -2 | 2  | 102.83 | 5.31 |
| 0  | 2  | -2 | 101.93 | 5.30 |
| 0  | 2  | -2 | 109.19 | 5.37 |
| 0  | -2 | -2 | 107.04 | 5.46 |
| 0  | -2 | 2  | 108.95 | 5.37 |
| 0  | 2  | 2  | 106.19 | 5.43 |
| 0  | -2 | -2 | 113.09 | 5.38 |
| 1  | 2  | -2 | 128.54 | 6.39 |
| 1  | -2 | 2  | 127.78 | 6.54 |
| -1 | 2  | 2  | 129.60 | 6.50 |
| 1  | 2  | -2 | 124.86 | 6.41 |
| 1  | -2 | 2  | 130.57 | 6.50 |
| -1 | 2  | 2  | 135.13 | 6.46 |
| 1  | -2 | 2  | 131.54 | 6.55 |
| -1 | 2  | 2  | 132.99 | 6.47 |
| -1 | -2 | -2 | 132.00 | 6.49 |
| -1 | -2 | -2 | 131.03 | 6.48 |
| -1 | -2 | -2 | 128.96 | 6.59 |
| -1 | 2  | 2  | 137.08 | 6.51 |
| -1 | 2  | 2  | 121.86 | 6.50 |
| 1  | 2  | -2 | 127.64 | 6.41 |
| -1 | -2 | -2 | 125.47 | 6.53 |
| 1  | 2  | -2 | 129.05 | 6.38 |
| 1  | 2  | 2  | 128.82 | 6.58 |
| -1 | -2 | 2  | 130.07 | 6.37 |
| 1  | -2 | -2 | 128.24 | 6.48 |
| -1 | 2  | -2 | 132.23 | 6.51 |
| -1 | 2  | -2 | 122.05 | 6.46 |
| -1 | -2 | 2  | 124.73 | 6.46 |
| 1  | 2  | 2  | 123.11 | 6.52 |
| -1 | -2 | 2  | 138.77 | 6.39 |
| 1  | -2 | -2 | 126.40 | 6.40 |
| -1 | 2  | -2 | 130.42 | 6.53 |
| -1 | 2  | -2 | 129.41 | 6.51 |
| -2 | 2  | 2  | 56.70  | 2.97 |
| -2 | -2 | -2 | 57.06  | 3.14 |

## CIF S3

|    |    |    |       |      |
|----|----|----|-------|------|
| 2  | 2  | -2 | 59.25 | 2.84 |
| -2 | -2 | -2 | 60.56 | 3.04 |
| 2  | -2 | 2  | 54.22 | 3.12 |
| -2 | -2 | -2 | 56.23 | 3.01 |
| -2 | 2  | 2  | 55.34 | 2.97 |
| -2 | -2 | -2 | 56.89 | 2.99 |
| -2 | 2  | 2  | 59.99 | 2.97 |
| 2  | 2  | -2 | 60.05 | 2.83 |
| -2 | -2 | -2 | 60.65 | 3.14 |
| -2 | 2  | 2  | 50.89 | 2.99 |
| -2 | -2 | -2 | 52.65 | 2.98 |
| 2  | 2  | -2 | 55.75 | 2.79 |
| -2 | 2  | 2  | 58.76 | 2.97 |
| 2  | -2 | 2  | 53.69 | 3.10 |
| -2 | 2  | -2 | 52.05 | 3.02 |
| -2 | 2  | -2 | 57.70 | 3.09 |
| -2 | -2 | 2  | 53.46 | 2.99 |
| 2  | -2 | -2 | 54.12 | 3.03 |
| 2  | -2 | -2 | 52.13 | 2.88 |
| 2  | 2  | 2  | 56.90 | 3.15 |
| -2 | 2  | -2 | 56.98 | 3.01 |
| -2 | 2  | -2 | 57.70 | 3.07 |
| -2 | 2  | -2 | 56.44 | 3.17 |
| -2 | -2 | 2  | 53.10 | 2.81 |
| 2  | 2  | 2  | 55.24 | 3.07 |
| 3  | -2 | 2  | 32.57 | 2.17 |
| 3  | 2  | -2 | 33.02 | 1.65 |
| 3  | -2 | 2  | 34.21 | 2.13 |
| -3 | 2  | 2  | 28.11 | 1.75 |
| -3 | -2 | -2 | 31.97 | 2.08 |
| -3 | -2 | -2 | 33.85 | 1.94 |
| 3  | -2 | 2  | 31.51 | 1.76 |
| -3 | 2  | 2  | 32.87 | 1.88 |
| -3 | -2 | -2 | 30.35 | 1.92 |
| -3 | 2  | -2 | 33.91 | 2.18 |
| 3  | -2 | -2 | 34.43 | 1.77 |
| 3  | -2 | -2 | 31.62 | 1.98 |
| -3 | 2  | -2 | 35.88 | 2.17 |
| -3 | -2 | 2  | 31.31 | 1.59 |
| -3 | -2 | 2  | 30.43 | 1.66 |
| 3  | 2  | 2  | 30.49 | 1.69 |

## CIF S3

|    |    |    |       |      |
|----|----|----|-------|------|
| -3 | 2  | -2 | 29.10 | 2.00 |
| 3  | 2  | 2  | 33.06 | 2.03 |
| -3 | -2 | 2  | 32.90 | 1.66 |
| -3 | 2  | -2 | 32.51 | 1.97 |
| 3  | 2  | 2  | 31.53 | 2.15 |
| 3  | -2 | -2 | 30.84 | 1.66 |
| -3 | -2 | 2  | 31.82 | 2.20 |
| 3  | -2 | -2 | 32.72 | 1.73 |
| -4 | 2  | 2  | 14.65 | 1.17 |
| 4  | -2 | 2  | 15.05 | 1.01 |
| -4 | 2  | 2  | 13.72 | 1.00 |
| -4 | -2 | -2 | 12.80 | 0.98 |
| -4 | -2 | -2 | 12.70 | 0.83 |
| 4  | -2 | 2  | 12.02 | 1.42 |
| -4 | -2 | -2 | 11.98 | 0.83 |
| -4 | -2 | -2 | 13.54 | 1.19 |
| -4 | 2  | 2  | 13.35 | 0.78 |
| 4  | -2 | 2  | 13.55 | 1.49 |
| -4 | -2 | 2  | 14.84 | 0.84 |
| -4 | 2  | -2 | 13.75 | 1.30 |
| -4 | -2 | 2  | 13.43 | 0.85 |
| 4  | -2 | -2 | 14.71 | 0.87 |
| -4 | 2  | -2 | 13.52 | 1.07 |
| 4  | 2  | 2  | 13.41 | 0.89 |
| -4 | 2  | -2 | 13.40 | 1.33 |
| -4 | 2  | -2 | 13.57 | 1.32 |
| -4 | 2  | -2 | 10.64 | 1.21 |
| 4  | -2 | -2 | 15.14 | 0.95 |
| 4  | 2  | 2  | 14.65 | 1.28 |
| 4  | -2 | -2 | 14.36 | 1.02 |
| -4 | 2  | -2 | 14.23 | 1.05 |
| -5 | -2 | -2 | 5.64  | 0.53 |
| -5 | -2 | -2 | 6.43  | 0.96 |
| -5 | 2  | 2  | 5.98  | 0.75 |
| -5 | -2 | -2 | 5.77  | 0.55 |
| -5 | -2 | -2 | 5.46  | 0.55 |
| -5 | 2  | 2  | 4.45  | 0.90 |
| 5  | -2 | 2  | 6.76  | 0.75 |
| 5  | 2  | -2 | 5.96  | 0.44 |
| -5 | -2 | -2 | 4.84  | 0.52 |
| -5 | 2  | 2  | 6.57  | 0.55 |

## CIF S3

|    |    |    |      |      |
|----|----|----|------|------|
| -5 | 2  | 2  | 5.84 | 0.50 |
| -5 | -2 | -2 | 5.67 | 0.72 |
| 5  | 2  | 2  | 5.47 | 0.62 |
| -5 | -2 | 2  | 4.97 | 0.51 |
| -5 | 2  | -2 | 5.91 | 0.61 |
| -5 | -2 | 2  | 5.35 | 0.39 |
| -5 | -2 | 2  | 4.99 | 0.51 |
| 5  | -2 | -2 | 6.76 | 0.81 |
| -5 | 2  | -2 | 5.43 | 0.90 |
| 5  | -2 | -2 | 6.26 | 0.71 |
| 5  | -2 | -2 | 5.68 | 0.61 |
| 6  | -2 | 2  | 9.44 | 0.90 |
| -6 | 2  | 2  | 8.35 | 0.70 |
| -6 | -2 | -2 | 9.28 | 0.65 |
| -6 | 2  | 2  | 8.25 | 0.65 |
| -6 | -2 | -2 | 8.83 | 0.68 |
| -6 | -2 | -2 | 8.37 | 0.65 |
| -6 | -2 | -2 | 8.92 | 0.88 |
| -6 | 2  | 2  | 8.03 | 0.81 |
| -6 | -2 | -2 | 7.34 | 0.67 |
| -6 | 2  | -2 | 7.60 | 0.74 |
| -6 | -2 | 2  | 8.37 | 0.55 |
| 6  | -2 | -2 | 7.70 | 0.93 |
| 6  | 2  | 2  | 8.00 | 0.77 |
| -6 | -2 | 2  | 8.55 | 0.54 |
| -6 | 2  | -2 | 8.68 | 1.02 |
| 6  | -2 | -2 | 8.61 | 0.81 |
| -7 | -2 | -2 | 4.34 | 0.76 |
| -7 | -2 | -2 | 3.68 | 0.62 |
| 7  | -2 | 2  | 4.09 | 0.86 |
| -7 | 2  | 2  | 5.02 | 0.65 |
| -7 | 2  | 2  | 4.77 | 0.62 |
| -7 | 2  | 2  | 4.91 | 0.61 |
| -7 | -2 | -2 | 4.16 | 0.58 |
| -7 | -2 | -2 | 3.68 | 0.48 |
| 7  | 2  | 2  | 4.13 | 0.73 |
| -7 | 2  | -2 | 3.75 | 0.75 |
| 7  | -2 | -2 | 3.76 | 0.71 |
| -7 | 2  | -2 | 5.30 | 0.66 |
| -7 | -2 | 2  | 4.24 | 0.47 |
| -7 | 2  | -2 | 2.95 | 0.79 |



## CIF S3

|     |    |    |       |      |
|-----|----|----|-------|------|
| -8  | 2  | 2  | 11.53 | 0.91 |
| -8  | -2 | -2 | 11.28 | 0.87 |
| -8  | -2 | -2 | 11.11 | 1.11 |
| -8  | -2 | -2 | 12.46 | 1.07 |
| -8  | -2 | -2 | 9.80  | 0.85 |
| -8  | 2  | 2  | 12.22 | 0.84 |
| -8  | 2  | -2 | 12.88 | 1.25 |
| -8  | 2  | -2 | 8.41  | 1.05 |
| -8  | 2  | -2 | 11.34 | 0.97 |
| -8  | -2 | 2  | 10.80 | 0.73 |
| -9  | -2 | -2 | 10.60 | 0.78 |
| -9  | -2 | -2 | 9.31  | 0.79 |
| -9  | 2  | 2  | 9.85  | 0.66 |
| -9  | -2 | -2 | 8.97  | 0.76 |
| -9  | 2  | 2  | 9.01  | 0.55 |
| -9  | -2 | -2 | 9.86  | 0.67 |
| -9  | 2  | 2  | 9.60  | 0.93 |
| -9  | 2  | 2  | 7.78  | 0.73 |
| -9  | -2 | -2 | 11.25 | 0.95 |
| -9  | -2 | 2  | 8.74  | 0.56 |
| -9  | -2 | 2  | 9.45  | 0.55 |
| -9  | 2  | -2 | 9.42  | 0.96 |
| -9  | 2  | -2 | 9.02  | 0.76 |
| -9  | 2  | -2 | 9.77  | 0.84 |
| -9  | -2 | 2  | 9.20  | 0.98 |
| -9  | 2  | -2 | 9.56  | 0.76 |
| -9  | 2  | -2 | 9.85  | 0.84 |
| -9  | 2  | -2 | 8.69  | 0.87 |
| -10 | -2 | -2 | 0.96  | 0.26 |
| -10 | 2  | 2  | 1.61  | 0.50 |
| -10 | 2  | 2  | 1.06  | 0.29 |
| -10 | 2  | -2 | 1.97  | 0.42 |
| -10 | 2  | -2 | 1.01  | 0.34 |
| -10 | 2  | -2 | 1.04  | 0.49 |
| -10 | 2  | -2 | 1.95  | 0.42 |
| 0   | 3  | 2  | 3.28  | 0.87 |
| 0   | 3  | 2  | 3.61  | 0.86 |
| 0   | 3  | -2 | 3.43  | 0.80 |
| 0   | 3  | -2 | 3.36  | 0.65 |
| 0   | -3 | -2 | 2.53  | 1.05 |
| 0   | 3  | 2  | 4.73  | 1.12 |

## CIF S3

|    |    |    |       |      |
|----|----|----|-------|------|
| 0  | -3 | 2  | 2.19  | 0.77 |
| 0  | -3 | 2  | 1.95  | 0.69 |
| 0  | -3 | 2  | 1.65  | 0.59 |
| 0  | -3 | -2 | 4.75  | 0.99 |
| 0  | -3 | -2 | 4.12  | 0.95 |
| 0  | 3  | -2 | 3.21  | 0.77 |
| 0  | 3  | 2  | 3.28  | 1.06 |
| -1 | 3  | 2  | 16.03 | 1.37 |
| 1  | 3  | -2 | 15.18 | 1.07 |
| -1 | 3  | 2  | 14.76 | 1.26 |
| 1  | 3  | -2 | 16.06 | 1.08 |
| -1 | 3  | 2  | 16.00 | 1.42 |
| -1 | -3 | -2 | 13.51 | 1.24 |
| -1 | 3  | 2  | 15.77 | 1.19 |
| 1  | -3 | 2  | 13.15 | 1.35 |
| -1 | -3 | -2 | 13.73 | 1.24 |
| 1  | 3  | -2 | 15.39 | 1.10 |
| 1  | -3 | 2  | 13.72 | 1.25 |
| -1 | -3 | -2 | 14.10 | 1.35 |
| 1  | -3 | 2  | 12.22 | 1.35 |
| -1 | -3 | -2 | 12.84 | 1.43 |
| 1  | 3  | 2  | 15.05 | 1.38 |
| -1 | 3  | -2 | 13.12 | 1.22 |
| 1  | -3 | -2 | 14.95 | 1.20 |
| -1 | -3 | 2  | 16.04 | 0.99 |
| -1 | -3 | 2  | 15.25 | 1.09 |
| -1 | 3  | -2 | 13.90 | 1.45 |
| 1  | 3  | 2  | 14.85 | 1.29 |
| -1 | -3 | 2  | 13.74 | 1.07 |
| -1 | 3  | -2 | 12.20 | 1.21 |
| 1  | -3 | -2 | 16.66 | 1.30 |
| -1 | 3  | -2 | 15.53 | 1.24 |
| -1 | -3 | 2  | 14.59 | 1.21 |
| -1 | 3  | -2 | 14.52 | 1.31 |
| 2  | 3  | -2 | 32.89 | 1.93 |
| -2 | 3  | 2  | 34.86 | 2.07 |
| 2  | 3  | -2 | 36.09 | 1.92 |
| -2 | 3  | 2  | 37.75 | 2.18 |
| -2 | -3 | -2 | 34.15 | 2.15 |
| -2 | 3  | 2  | 31.87 | 2.13 |
| -2 | -3 | -2 | 34.26 | 2.25 |

## CIF S3

|    |    |    |       |      |
|----|----|----|-------|------|
| -2 | -3 | -2 | 35.24 | 2.06 |
| 2  | -3 | 2  | 33.23 | 1.94 |
| 2  | -3 | 2  | 32.48 | 2.24 |
| 2  | -3 | 2  | 35.66 | 2.24 |
| -2 | -3 | -2 | 35.52 | 2.07 |
| -2 | 3  | 2  | 31.72 | 2.09 |
| 2  | 3  | 2  | 39.42 | 2.31 |
| 2  | -3 | -2 | 39.57 | 2.01 |
| -2 | -3 | 2  | 35.93 | 2.14 |
| -2 | -3 | 2  | 33.65 | 1.91 |
| 2  | -3 | -2 | 34.41 | 2.15 |
| 2  | -3 | -2 | 32.07 | 1.98 |
| -2 | -3 | 2  | 36.42 | 1.93 |
| -2 | 3  | -2 | 32.51 | 2.13 |
| -2 | 3  | -2 | 36.02 | 2.21 |
| 2  | -3 | -2 | 33.14 | 1.85 |
| 2  | 3  | 2  | 37.52 | 2.18 |
| -3 | 3  | 2  | 1.55  | 0.54 |
| -3 | -3 | -2 | 2.27  | 0.62 |
| -3 | 3  | 2  | 3.09  | 0.63 |
| 3  | 3  | -2 | 2.09  | 0.23 |
| -3 | -3 | -2 | 3.62  | 0.84 |
| 3  | -3 | 2  | 2.63  | 0.70 |
| 3  | -3 | 2  | 2.68  | 0.64 |
| 3  | -3 | 2  | 1.45  | 0.79 |
| -3 | 3  | 2  | 1.77  | 0.58 |
| 3  | 3  | -2 | 3.29  | 0.56 |
| -3 | -3 | -2 | 1.91  | 0.45 |
| -3 | -3 | -2 | 2.84  | 1.13 |
| -3 | -3 | -2 | 2.12  | 0.61 |
| 3  | -3 | 2  | 2.16  | 0.96 |
| 3  | 3  | -2 | 2.46  | 0.40 |
| -3 | -3 | 2  | 2.88  | 0.53 |
| 3  | -3 | -2 | 3.34  | 0.69 |
| -3 | -3 | 2  | 3.42  | 0.39 |
| -3 | -3 | 2  | 2.70  | 0.57 |
| 3  | -3 | -2 | 2.23  | 0.50 |
| -3 | -3 | 2  | 2.87  | 0.28 |
| 3  | 3  | 2  | 2.72  | 0.48 |
| 3  | -3 | -2 | 3.87  | 0.81 |
| 3  | -3 | -2 | 3.46  | 1.03 |

## CIF S3

|    |    |    |       |      |
|----|----|----|-------|------|
| -3 | -3 | 2  | 3.39  | 1.01 |
| 3  | 3  | 2  | 2.67  | 1.10 |
| -3 | 3  | -2 | 2.61  | 0.65 |
| -3 | -3 | 2  | 2.38  | 0.43 |
| 3  | 3  | 2  | 2.31  | 0.75 |
| -3 | 3  | -2 | 2.91  | 0.92 |
| -4 | -3 | -2 | 53.08 | 2.78 |
| -4 | -3 | -2 | 55.36 | 3.21 |
| -4 | 3  | 2  | 56.75 | 3.00 |
| 4  | -3 | 2  | 53.49 | 2.78 |
| -4 | -3 | -2 | 51.47 | 2.65 |
| -4 | 3  | 2  | 54.12 | 2.80 |
| -4 | -3 | -2 | 50.26 | 2.63 |
| -4 | -3 | -2 | 51.88 | 2.98 |
| -4 | 3  | 2  | 52.40 | 2.65 |
| 4  | 3  | -2 | 53.85 | 2.60 |
| -4 | -3 | -2 | 50.91 | 2.65 |
| 4  | -3 | 2  | 53.89 | 3.33 |
| 4  | -3 | 2  | 47.18 | 3.22 |
| -4 | 3  | -2 | 51.65 | 2.71 |
| -4 | 3  | -2 | 48.85 | 2.69 |
| 4  | -3 | -2 | 57.66 | 2.84 |
| 4  | 3  | 2  | 52.81 | 2.72 |
| -4 | 3  | -2 | 48.76 | 3.13 |
| -4 | -3 | 2  | 50.57 | 2.61 |
| -4 | -3 | 2  | 50.69 | 2.74 |
| 4  | -3 | -2 | 57.20 | 2.79 |
| -4 | -3 | 2  | 55.04 | 2.60 |
| -4 | 3  | -2 | 50.05 | 2.81 |
| -4 | -3 | 2  | 55.83 | 2.73 |
| 4  | 3  | 2  | 49.87 | 3.05 |
| 5  | -3 | 2  | 9.39  | 0.95 |
| -5 | -3 | -2 | 9.01  | 0.84 |
| -5 | -3 | -2 | 9.34  | 1.26 |
| -5 | 3  | 2  | 8.97  | 0.70 |
| -5 | 3  | 2  | 6.22  | 1.18 |
| -5 | 3  | 2  | 8.17  | 0.92 |
| -5 | -3 | -2 | 9.58  | 0.66 |
| -5 | 3  | 2  | 8.20  | 0.71 |
| 5  | 3  | -2 | 9.51  | 0.60 |
| -5 | -3 | -2 | 8.78  | 0.69 |

## CIF S3

|    |    |    |       |      |
|----|----|----|-------|------|
| 5  | -3 | 2  | 9.81  | 1.60 |
| -5 | -3 | -2 | 9.46  | 0.67 |
| -5 | -3 | -2 | 8.79  | 0.67 |
| -5 | -3 | 2  | 9.37  | 0.55 |
| -5 | 3  | -2 | 9.49  | 0.75 |
| -5 | -3 | 2  | 8.67  | 0.58 |
| -5 | -3 | 2  | 7.96  | 0.84 |
| -5 | 3  | -2 | 9.75  | 0.81 |
| 5  | 3  | 2  | 9.94  | 0.80 |
| 5  | -3 | -2 | 10.84 | 1.00 |
| 5  | -3 | -2 | 9.10  | 0.87 |
| -5 | 3  | -2 | 8.35  | 0.74 |
| 6  | -3 | 2  | 23.00 | 1.51 |
| -6 | -3 | -2 | 23.34 | 1.27 |
| -6 | -3 | -2 | 22.35 | 1.30 |
| -6 | -3 | -2 | 22.64 | 1.24 |
| -6 | 3  | 2  | 24.73 | 1.32 |
| -6 | -3 | -2 | 23.11 | 1.30 |
| -6 | 3  | 2  | 23.98 | 1.32 |
| -6 | -3 | -2 | 23.52 | 1.43 |
| 6  | -3 | -2 | 22.50 | 1.48 |
| 6  | 3  | 2  | 21.89 | 1.41 |
| 6  | -3 | -2 | 22.54 | 1.58 |
| -6 | 3  | -2 | 21.24 | 2.02 |
| -6 | 3  | -2 | 22.11 | 1.34 |
| -6 | -3 | 2  | 24.36 | 1.21 |
| -6 | -3 | 2  | 21.27 | 1.20 |
| 7  | -3 | 2  | 19.36 | 1.44 |
| -7 | 3  | 2  | 20.71 | 1.32 |
| -7 | 3  | 2  | 20.10 | 1.27 |
| -7 | -3 | -2 | 20.80 | 1.20 |
| -7 | -3 | -2 | 19.00 | 1.19 |
| -7 | 3  | 2  | 18.32 | 1.19 |
| -7 | -3 | -2 | 17.66 | 1.26 |
| -7 | -3 | 2  | 20.68 | 1.08 |
| -7 | 3  | -2 | 21.66 | 1.28 |
| 7  | -3 | -2 | 18.23 | 1.38 |
| -7 | 3  | -2 | 19.30 | 1.56 |
| -7 | 3  | -2 | 20.03 | 1.21 |
| -8 | -3 | -2 | 5.58  | 0.68 |
| -8 | -3 | -2 | 5.65  | 0.72 |

## CIF S3

|     |    |    |      |      |
|-----|----|----|------|------|
| -8  | 3  | 2  | 5.54 | 0.79 |
| -8  | -3 | -2 | 4.76 | 0.68 |
| -8  | 3  | 2  | 5.71 | 0.70 |
| -8  | 3  | 2  | 6.26 | 0.63 |
| -8  | -3 | -2 | 6.01 | 0.63 |
| -8  | 3  | 2  | 5.72 | 0.74 |
| -8  | -3 | -2 | 5.22 | 0.59 |
| -8  | 3  | 2  | 5.39 | 0.81 |
| -8  | -3 | -2 | 5.25 | 0.72 |
| -8  | -3 | -2 | 5.57 | 0.90 |
| -8  | 3  | 2  | 4.89 | 0.63 |
| -8  | 3  | 2  | 4.42 | 0.79 |
| -8  | 3  | -2 | 5.49 | 0.85 |
| -8  | 3  | -2 | 6.87 | 0.89 |
| -8  | 3  | -2 | 5.18 | 0.74 |
| -8  | -3 | 2  | 5.90 | 0.55 |
| -8  | 3  | -2 | 5.21 | 0.84 |
| -8  | 3  | -2 | 5.93 | 0.72 |
| -8  | -3 | 2  | 5.44 | 0.45 |
| -8  | 3  | -2 | 6.36 | 0.85 |
| -8  | 3  | -2 | 5.95 | 0.80 |
| -9  | -3 | -2 | 6.48 | 0.72 |
| -9  | -3 | -2 | 5.40 | 0.49 |
| -9  | -3 | -2 | 5.38 | 0.59 |
| -9  | 3  | 2  | 5.93 | 0.58 |
| -9  | 3  | 2  | 4.83 | 0.63 |
| -9  | 3  | 2  | 5.36 | 1.02 |
| -9  | 3  | 2  | 5.37 | 0.50 |
| -9  | 3  | 2  | 5.73 | 0.84 |
| -9  | -3 | 2  | 5.14 | 0.37 |
| -9  | 3  | -2 | 5.07 | 0.73 |
| -9  | 3  | -2 | 5.35 | 0.64 |
| -9  | 3  | -2 | 4.96 | 0.66 |
| -9  | 3  | -2 | 5.99 | 0.76 |
| -9  | -3 | 2  | 5.58 | 0.35 |
| -9  | 3  | -2 | 4.46 | 0.81 |
| -9  | 3  | -2 | 5.85 | 0.84 |
| -10 | 3  | 2  | 1.21 | 0.26 |
| -10 | 3  | 2  | 1.40 | 0.24 |
| -10 | -3 | -2 | 1.34 | 0.30 |
| -10 | 3  | 2  | 1.17 | 0.45 |

## CIF S3

|     |    |    |       |      |
|-----|----|----|-------|------|
| -10 | 3  | -2 | 0.88  | 0.30 |
| -10 | 3  | -2 | 0.88  | 0.36 |
| -10 | 3  | -2 | 1.13  | 0.27 |
| -10 | 3  | -2 | 1.45  | 0.38 |
| -10 | 3  | -2 | 1.05  | 0.46 |
| 0   | -4 | 2  | 2.30  | 0.89 |
| 0   | -4 | -2 | 1.47  | 0.76 |
| 0   | -4 | 2  | 1.87  | 0.93 |
| 0   | 4  | -2 | 1.92  | 0.58 |
| 0   | 4  | 2  | 1.23  | 0.71 |
| 0   | 4  | 2  | 2.36  | 0.95 |
| 0   | 4  | -2 | 1.25  | 0.65 |
| 0   | -4 | 2  | 3.35  | 0.93 |
| 0   | 4  | -2 | 2.41  | 0.71 |
| 0   | -4 | -2 | 1.51  | 0.81 |
| -1  | 4  | 2  | 47.20 | 2.92 |
| -1  | -4 | -2 | 52.97 | 2.99 |
| 1   | 4  | -2 | 51.23 | 2.82 |
| 1   | 4  | -2 | 50.78 | 2.84 |
| 1   | 4  | -2 | 45.57 | 2.86 |
| 1   | -4 | 2  | 51.10 | 3.00 |
| -1  | -4 | -2 | 51.49 | 2.89 |
| -1  | 4  | 2  | 44.74 | 3.02 |
| -1  | -4 | -2 | 53.32 | 2.95 |
| -1  | -4 | 2  | 52.28 | 2.82 |
| 1   | -4 | -2 | 51.55 | 2.89 |
| 1   | -4 | -2 | 51.46 | 2.98 |
| -1  | 4  | -2 | 53.98 | 2.93 |
| -1  | -4 | 2  | 54.74 | 3.01 |
| 1   | 4  | 2  | 53.88 | 3.07 |
| -1  | 4  | -2 | 46.57 | 2.93 |
| 1   | -4 | -2 | 50.80 | 2.76 |
| -1  | -4 | 2  | 49.84 | 2.96 |
| -1  | 4  | -2 | 53.00 | 2.95 |
| 1   | 4  | 2  | 55.79 | 2.99 |
| 2   | 4  | -2 | 19.17 | 1.15 |
| 2   | 4  | -2 | 19.19 | 1.11 |
| 2   | -4 | 2  | 20.01 | 1.65 |
| 2   | 4  | -2 | 19.05 | 1.36 |
| -2  | 4  | 2  | 21.47 | 1.71 |
| -2  | -4 | -2 | 21.87 | 1.75 |

## CIF S3

|    |    |    |       |      |
|----|----|----|-------|------|
| -2 | -4 | -2 | 19.59 | 1.51 |
| 2  | -4 | 2  | 19.69 | 1.34 |
| -2 | 4  | 2  | 16.15 | 1.65 |
| 2  | -4 | 2  | 19.71 | 1.27 |
| 2  | 4  | -2 | 19.23 | 1.38 |
| -2 | -4 | -2 | 21.16 | 1.51 |
| -2 | -4 | -2 | 19.26 | 1.64 |
| -2 | 4  | 2  | 22.80 | 1.54 |
| 2  | 4  | 2  | 20.33 | 1.59 |
| 2  | -4 | -2 | 23.56 | 1.34 |
| -2 | 4  | -2 | 20.89 | 1.67 |
| 2  | 4  | 2  | 19.93 | 1.71 |
| 2  | 4  | 2  | 19.27 | 1.20 |
| -2 | 4  | -2 | 19.11 | 1.23 |
| 2  | -4 | -2 | 20.72 | 1.46 |
| -2 | -4 | 2  | 19.64 | 1.65 |
| -2 | 4  | -2 | 19.87 | 1.52 |
| -2 | -4 | 2  | 18.64 | 1.18 |
| 2  | -4 | -2 | 21.35 | 1.37 |
| 2  | -4 | -2 | 20.92 | 1.66 |
| 3  | 4  | -2 | 87.20 | 4.24 |
| -3 | 4  | 2  | 77.39 | 4.55 |
| -3 | -4 | -2 | 85.61 | 4.55 |
| -3 | -4 | -2 | 91.61 | 4.82 |
| 3  | 4  | -2 | 79.89 | 4.44 |
| 3  | -4 | 2  | 91.17 | 4.45 |
| -3 | 4  | 2  | 88.86 | 4.48 |
| 3  | 4  | -2 | 84.47 | 4.21 |
| 3  | -4 | 2  | 87.64 | 4.36 |
| -3 | -4 | -2 | 82.23 | 4.21 |
| -3 | -4 | -2 | 81.00 | 4.33 |
| 3  | 4  | -2 | 90.41 | 4.63 |
| 3  | -4 | 2  | 85.49 | 4.81 |
| -3 | 4  | 2  | 91.23 | 4.61 |
| -3 | -4 | -2 | 81.38 | 4.51 |
| -3 | -4 | 2  | 86.32 | 4.18 |
| -3 | -4 | 2  | 84.20 | 4.24 |
| -3 | -4 | 2  | 89.88 | 4.39 |
| 3  | -4 | -2 | 88.76 | 4.33 |
| 3  | 4  | 2  | 85.57 | 4.29 |
| 3  | -4 | -2 | 85.49 | 4.35 |



## CIF S3

|    |    |    |       |      |
|----|----|----|-------|------|
| -3 | -4 | 2  | 81.51 | 4.17 |
| 3  | -4 | -2 | 87.32 | 4.71 |
| 3  | -4 | -2 | 82.11 | 4.41 |
| -3 | 4  | -2 | 81.09 | 4.30 |
| -3 | 4  | -2 | 84.80 | 4.38 |
| -3 | -4 | 2  | 88.30 | 4.68 |
| 3  | 4  | 2  | 79.79 | 4.64 |
| -3 | 4  | -2 | 84.37 | 4.74 |
| -3 | 4  | -2 | 85.00 | 4.27 |
| 4  | -4 | 2  | 8.46  | 0.94 |
| -4 | -4 | -2 | 8.31  | 0.83 |
| 4  | 4  | -2 | 7.59  | 0.57 |
| 4  | -4 | 2  | 7.28  | 1.37 |
| -4 | -4 | -2 | 7.54  | 0.61 |
| -4 | 4  | 2  | 6.83  | 1.17 |
| 4  | 4  | -2 | 7.35  | 0.63 |
| -4 | -4 | -2 | 7.59  | 0.62 |
| -4 | 4  | 2  | 7.15  | 1.39 |
| -4 | -4 | -2 | 7.71  | 0.63 |
| -4 | -4 | -2 | 5.70  | 1.48 |
| -4 | -4 | -2 | 9.07  | 1.11 |
| -4 | 4  | 2  | 6.81  | 0.71 |
| -4 | 4  | 2  | 7.18  | 0.71 |
| -4 | 4  | 2  | 7.80  | 0.96 |
| 4  | 4  | 2  | 8.13  | 0.71 |
| -4 | -4 | 2  | 8.42  | 0.80 |
| 4  | 4  | 2  | 6.31  | 1.05 |
| 4  | -4 | -2 | 7.37  | 0.95 |
| -4 | -4 | 2  | 7.88  | 0.57 |
| -4 | -4 | 2  | 7.88  | 0.46 |
| -4 | 4  | -2 | 7.15  | 0.87 |
| -4 | 4  | -2 | 6.68  | 0.69 |
| 4  | -4 | -2 | 8.83  | 1.35 |
| 4  | -4 | -2 | 7.30  | 0.82 |
| -4 | 4  | -2 | 7.61  | 0.79 |
| -5 | -4 | -2 | 26.75 | 1.50 |
| -5 | -4 | -2 | 27.85 | 1.48 |
| -5 | -4 | -2 | 26.14 | 1.51 |
| 5  | -4 | 2  | 28.29 | 2.34 |
| -5 | 4  | 2  | 28.80 | 1.74 |
| -5 | -4 | -2 | 28.81 | 1.66 |

## CIF S3

|    |    |    |       |      |
|----|----|----|-------|------|
| -5 | -4 | -2 | 23.74 | 1.62 |
| 5  | -4 | 2  | 28.81 | 1.70 |
| -5 | -4 | -2 | 28.66 | 1.49 |
| -5 | 4  | 2  | 27.13 | 1.55 |
| 5  | 4  | 2  | 30.25 | 1.62 |
| -5 | 4  | -2 | 27.45 | 1.58 |
| -5 | -4 | 2  | 26.96 | 1.45 |
| -5 | 4  | -2 | 29.37 | 1.57 |
| 5  | -4 | -2 | 24.96 | 1.80 |
| -5 | 4  | -2 | 27.90 | 1.61 |
| 5  | -4 | -2 | 28.23 | 1.72 |
| 6  | -4 | 2  | 0.70  | 0.72 |
| -6 | -4 | -2 | 0.99  | 0.36 |
| -6 | -4 | -2 | 1.29  | 0.45 |
| -6 | -4 | -2 | 1.26  | 0.38 |
| -6 | -4 | -2 | 0.88  | 0.55 |
| -6 | 4  | 2  | -0.11 | 0.70 |
| -6 | -4 | -2 | 1.77  | 0.72 |
| -6 | -4 | -2 | 0.46  | 0.39 |
| -6 | 4  | 2  | 1.06  | 0.48 |
| -6 | 4  | 2  | 1.89  | 0.56 |
| -6 | -4 | 2  | 1.38  | 0.33 |
| 6  | 4  | 2  | 0.69  | 0.58 |
| -6 | 4  | -2 | 1.44  | 0.53 |
| 6  | -4 | -2 | 0.64  | 0.73 |
| 6  | -4 | -2 | 0.89  | 0.82 |
| -6 | -4 | 2  | 1.26  | 0.30 |
| -6 | 4  | -2 | 1.61  | 0.57 |
| -7 | -4 | -2 | 12.95 | 0.92 |
| -7 | 4  | 2  | 13.78 | 1.07 |
| -7 | 4  | 2  | 12.91 | 1.20 |
| -7 | -4 | -2 | 14.39 | 0.95 |
| 7  | -4 | 2  | 11.08 | 1.22 |
| -7 | -4 | -2 | 13.52 | 0.99 |
| 7  | 4  | 2  | 10.90 | 1.12 |
| -7 | -4 | 2  | 13.64 | 0.81 |
| -7 | 4  | -2 | 12.43 | 1.05 |
| -7 | 4  | -2 | 13.21 | 1.11 |
| 7  | -4 | -2 | 12.52 | 1.19 |
| -8 | -4 | -2 | 7.31  | 0.73 |
| -8 | 4  | 2  | 7.71  | 0.85 |

## CIF S3

|     |    |    |       |      |
|-----|----|----|-------|------|
| -8  | -4 | -2 | 8.05  | 0.74 |
| -8  | 4  | 2  | 6.48  | 0.79 |
| -8  | -4 | -2 | 8.65  | 0.73 |
| -8  | 4  | 2  | 6.19  | 0.81 |
| -8  | -4 | -2 | 7.71  | 0.68 |
| -8  | -4 | -2 | 7.86  | 0.68 |
| -8  | 4  | 2  | 8.73  | 0.87 |
| -8  | 4  | 2  | 7.38  | 0.89 |
| -8  | 4  | -2 | 7.48  | 0.92 |
| -8  | -4 | 2  | 7.64  | 0.51 |
| -8  | -4 | 2  | 8.40  | 0.60 |
| -8  | 4  | -2 | 8.12  | 0.86 |
| -8  | 4  | -2 | 8.54  | 0.93 |
| -8  | 4  | -2 | 7.97  | 0.88 |
| -8  | 4  | -2 | 7.84  | 0.90 |
| -8  | 4  | -2 | 7.46  | 0.80 |
| -8  | 4  | -2 | 8.02  | 0.93 |
| -9  | 4  | 2  | 2.97  | 0.77 |
| -9  | 4  | 2  | 3.40  | 0.58 |
| -9  | 4  | 2  | 3.77  | 0.50 |
| -9  | 4  | 2  | 2.53  | 0.60 |
| -9  | 4  | -2 | 2.17  | 0.52 |
| -9  | 4  | -2 | 2.98  | 0.74 |
| -9  | 4  | -2 | 2.64  | 0.57 |
| -9  | 4  | -2 | 3.95  | 0.65 |
| -10 | 4  | 2  | 4.38  | 0.65 |
| -10 | 4  | 2  | 5.00  | 0.45 |
| -10 | -4 | -2 | 5.00  | 0.44 |
| -10 | -4 | -2 | 5.21  | 0.38 |
| -10 | 4  | 2  | 4.61  | 0.54 |
| -10 | 4  | -2 | 5.21  | 0.48 |
| -10 | 4  | -2 | 4.72  | 0.64 |
| -10 | 4  | -2 | 4.30  | 0.58 |
| -10 | 4  | -2 | 5.68  | 0.58 |
| 0   | -5 | -2 | -0.45 | 0.83 |
| 0   | 5  | -2 | -0.04 | 0.76 |
| 0   | 5  | 2  | 0.19  | 0.83 |
| 0   | 5  | 2  | 0.46  | 0.52 |
| 0   | -5 | -2 | 0.05  | 0.77 |
| 0   | 5  | 2  | -0.33 | 0.70 |
| 0   | -5 | 2  | -0.06 | 0.75 |

## CIF S3

|    |    |    |        |      |
|----|----|----|--------|------|
| 0  | 5  | -2 | 0.21   | 0.71 |
| 0  | 5  | -2 | 0.42   | 0.48 |
| 0  | -5 | 2  | 0.58   | 0.92 |
| 0  | 5  | -2 | 0.17   | 0.23 |
| 0  | 5  | -2 | 0.57   | 0.50 |
| -1 | -5 | -2 | 58.68  | 3.34 |
| 1  | -5 | 2  | 57.60  | 3.37 |
| 1  | 5  | -2 | 57.77  | 3.01 |
| 1  | 5  | -2 | 56.25  | 3.37 |
| 1  | 5  | -2 | 61.89  | 3.25 |
| 1  | -5 | 2  | 58.19  | 3.40 |
| 1  | 5  | -2 | 56.22  | 3.24 |
| -1 | -5 | -2 | 59.29  | 3.39 |
| -1 | 5  | 2  | 59.89  | 3.42 |
| 1  | 5  | -2 | 56.28  | 2.93 |
| -1 | -5 | 2  | 52.89  | 2.85 |
| -1 | 5  | -2 | 52.93  | 2.99 |
| -1 | -5 | 2  | 58.17  | 3.22 |
| 1  | -5 | -2 | 60.95  | 3.08 |
| -1 | 5  | -2 | 58.32  | 3.07 |
| -1 | 5  | -2 | 61.97  | 3.47 |
| 1  | -5 | -2 | 56.80  | 3.31 |
| -1 | -5 | 2  | 56.32  | 3.00 |
| 1  | 5  | 2  | 50.44  | 3.36 |
| 1  | -5 | -2 | 58.78  | 3.40 |
| 1  | 5  | 2  | 58.21  | 3.36 |
| 1  | 5  | 2  | 55.09  | 2.95 |
| -1 | 5  | -2 | 59.28  | 3.36 |
| 1  | -5 | -2 | 53.36  | 3.11 |
| -1 | -5 | 2  | 56.79  | 3.35 |
| -1 | 5  | -2 | 60.53  | 3.46 |
| -2 | 5  | 2  | 99.63  | 4.83 |
| 2  | 5  | -2 | 98.14  | 4.80 |
| 2  | -5 | 2  | 98.07  | 4.87 |
| -2 | 5  | 2  | 101.22 | 5.34 |
| -2 | -5 | -2 | 95.84  | 5.28 |
| 2  | -5 | 2  | 95.08  | 5.29 |
| 2  | 5  | -2 | 92.48  | 5.06 |
| -2 | -5 | -2 | 89.56  | 4.72 |
| 2  | 5  | -2 | 97.07  | 5.09 |
| -2 | 5  | -2 | 93.54  | 4.86 |

## CIF S3

|    |    |    |        |      |
|----|----|----|--------|------|
| 2  | 5  | 2  | 95.66  | 5.20 |
| -2 | -5 | 2  | 90.81  | 4.96 |
| 2  | -5 | -2 | 102.53 | 5.25 |
| 2  | -5 | -2 | 96.75  | 4.89 |
| 2  | 5  | 2  | 104.96 | 5.36 |
| -2 | -5 | 2  | 96.99  | 5.21 |
| 2  | 5  | 2  | 95.85  | 4.81 |
| -2 | 5  | -2 | 99.21  | 5.35 |
| -2 | -5 | 2  | 88.34  | 4.71 |
| -2 | -5 | 2  | 91.06  | 4.81 |
| -2 | 5  | -2 | 93.71  | 5.21 |
| 2  | -5 | -2 | 93.86  | 4.98 |
| -2 | -5 | 2  | 93.41  | 4.70 |
| 3  | -5 | 2  | 108.62 | 5.29 |
| 3  | -5 | 2  | 106.66 | 5.37 |
| -3 | 5  | 2  | 94.29  | 5.15 |
| -3 | -5 | -2 | 104.77 | 5.78 |
| 3  | -5 | 2  | 96.66  | 5.17 |
| -3 | -5 | -2 | 102.29 | 5.46 |
| 3  | 5  | -2 | 105.67 | 5.47 |
| 3  | 5  | -2 | 106.74 | 5.17 |
| -3 | -5 | -2 | 100.31 | 5.10 |
| 3  | -5 | 2  | 111.03 | 5.76 |
| -3 | -5 | -2 | 95.78  | 5.48 |
| -3 | -5 | -2 | 104.17 | 5.25 |
| -3 | -5 | 2  | 106.73 | 5.07 |
| 3  | -5 | -2 | 112.85 | 5.29 |
| -3 | 5  | -2 | 102.46 | 5.21 |
| -3 | -5 | 2  | 101.25 | 5.35 |
| -3 | 5  | -2 | 102.36 | 5.27 |
| 3  | 5  | 2  | 108.57 | 5.66 |
| 3  | 5  | 2  | 101.81 | 5.21 |
| -3 | -5 | 2  | 107.49 | 5.09 |
| 3  | -5 | -2 | 97.77  | 5.67 |
| -3 | -5 | 2  | 105.85 | 5.18 |
| -3 | 5  | -2 | 91.21  | 5.16 |
| -3 | -5 | 2  | 107.76 | 5.68 |
| 3  | -5 | -2 | 105.96 | 5.37 |
| 4  | -5 | 2  | 12.40  | 1.09 |
| -4 | 5  | 2  | 13.95  | 0.99 |
| 4  | -5 | 2  | 12.70  | 1.74 |

## CIF S3

|    |    |    |       |      |
|----|----|----|-------|------|
| 4  | 5  | -2 | 13.38 | 0.90 |
| -4 | 5  | 2  | 13.99 | 0.93 |
| -4 | -5 | -2 | 11.09 | 1.86 |
| -4 | -5 | -2 | 12.99 | 1.08 |
| -4 | -5 | -2 | 11.35 | 1.33 |
| -4 | 5  | 2  | 13.55 | 1.00 |
| -4 | -5 | -2 | 13.55 | 0.85 |
| -4 | -5 | -2 | 12.43 | 0.93 |
| -4 | -5 | 2  | 12.72 | 0.86 |
| -4 | 5  | -2 | 12.02 | 0.99 |
| 4  | 5  | 2  | 12.47 | 0.99 |
| 4  | -5 | -2 | 13.05 | 1.09 |
| -4 | 5  | -2 | 12.92 | 1.04 |
| 4  | -5 | -2 | 13.21 | 1.60 |
| 4  | -5 | -2 | 14.18 | 1.27 |
| -4 | -5 | 2  | 11.74 | 0.84 |
| -4 | 5  | -2 | 13.11 | 1.10 |
| -4 | -5 | 2  | 13.27 | 0.72 |
| -5 | -5 | -2 | 8.48  | 0.66 |
| -5 | -5 | -2 | 8.78  | 0.94 |
| -5 | -5 | -2 | 7.49  | 0.73 |
| -5 | -5 | -2 | 8.12  | 0.68 |
| -5 | -5 | -2 | 7.22  | 0.97 |
| -5 | -5 | -2 | 5.99  | 0.84 |
| -5 | -5 | -2 | 7.04  | 1.29 |
| -5 | 5  | 2  | 8.11  | 0.79 |
| 5  | -5 | 2  | 6.89  | 0.92 |
| 5  | 5  | 2  | 8.46  | 0.88 |
| -5 | -5 | 2  | 8.36  | 0.52 |
| 5  | -5 | -2 | 8.32  | 1.02 |
| -5 | 5  | -2 | 8.41  | 0.91 |
| -5 | -5 | 2  | 7.91  | 0.63 |
| -5 | 5  | -2 | 8.38  | 0.79 |
| -5 | 5  | -2 | 8.31  | 0.87 |
| -5 | -5 | 2  | 8.04  | 0.66 |
| 5  | -5 | -2 | 6.85  | 1.12 |
| -6 | -5 | -2 | 4.47  | 0.76 |
| -6 | -5 | -2 | 4.48  | 0.89 |
| -6 | 5  | 2  | 3.37  | 0.79 |
| -6 | -5 | -2 | 4.21  | 0.53 |
| -6 | -5 | -2 | 4.53  | 0.68 |

## CIF S3

|    |    |    |      |      |
|----|----|----|------|------|
| -6 | 5  | 2  | 5.03 | 1.10 |
| 6  | -5 | 2  | 3.88 | 0.95 |
| -6 | -5 | -2 | 3.76 | 0.97 |
| -6 | -5 | -2 | 4.53 | 0.54 |
| -6 | 5  | 2  | 3.93 | 0.68 |
| -6 | -5 | -2 | 3.49 | 0.62 |
| 6  | 5  | 2  | 5.76 | 0.84 |
| 6  | -5 | -2 | 3.60 | 0.93 |
| -6 | -5 | 2  | 3.75 | 0.52 |
| -6 | 5  | -2 | 3.86 | 0.75 |
| -6 | 5  | -2 | 4.74 | 0.75 |
| 6  | -5 | -2 | 3.65 | 1.09 |
| -6 | -5 | 2  | 4.73 | 0.52 |
| -7 | 5  | 2  | 3.06 | 0.90 |
| -7 | -5 | -2 | 1.51 | 0.46 |
| -7 | -5 | -2 | 3.15 | 0.66 |
| 7  | -5 | 2  | 0.51 | 0.76 |
| -7 | -5 | -2 | 3.95 | 0.72 |
| -7 | 5  | 2  | 2.45 | 0.69 |
| -7 | 5  | 2  | 2.08 | 0.57 |
| 7  | 5  | 2  | 3.24 | 0.84 |
| -7 | 5  | -2 | 1.68 | 0.69 |
| 7  | -5 | -2 | 2.19 | 0.91 |
| -7 | 5  | -2 | 2.47 | 0.62 |
| -7 | -5 | 2  | 2.49 | 0.44 |
| -8 | -5 | -2 | 2.15 | 0.47 |
| -8 | 5  | 2  | 1.26 | 0.51 |
| -8 | -5 | -2 | 2.34 | 0.58 |
| -8 | 5  | 2  | 2.26 | 0.51 |
| -8 | -5 | -2 | 1.14 | 0.38 |
| -8 | 5  | 2  | 2.04 | 0.65 |
| -8 | 5  | 2  | 1.10 | 0.87 |
| -8 | -5 | -2 | 1.92 | 0.35 |
| -8 | 5  | 2  | 1.80 | 0.52 |
| -8 | 5  | -2 | 2.50 | 0.60 |
| -8 | 5  | -2 | 2.09 | 0.56 |
| -8 | 5  | -2 | 1.80 | 0.84 |
| -8 | 5  | -2 | 2.23 | 0.58 |
| -8 | 5  | -2 | 1.90 | 0.55 |
| -8 | 5  | -2 | 2.20 | 0.57 |
| -8 | 5  | -2 | 1.43 | 0.54 |

## CIF S3

|     |    |    |       |      |
|-----|----|----|-------|------|
| -8  | -5 | 2  | 1.99  | 0.44 |
| -8  | -5 | 2  | 1.73  | 0.35 |
| -8  | 5  | -2 | 1.52  | 0.71 |
| -9  | 5  | 2  | 1.49  | 0.43 |
| -9  | 5  | 2  | 1.33  | 0.42 |
| -9  | 5  | 2  | 2.21  | 0.54 |
| -9  | 5  | 2  | 2.08  | 0.54 |
| -9  | 5  | 2  | 2.29  | 0.58 |
| -9  | 5  | -2 | 3.02  | 0.72 |
| -9  | 5  | -2 | 2.18  | 0.48 |
| -9  | 5  | -2 | 2.54  | 0.67 |
| -9  | 5  | -2 | 2.35  | 0.60 |
| -9  | 5  | -2 | 1.70  | 0.47 |
| -10 | -5 | -2 | 0.76  | 0.21 |
| -10 | 5  | 2  | 1.36  | 0.39 |
| -10 | 5  | 2  | 0.89  | 0.24 |
| -10 | -5 | -2 | 0.78  | 0.22 |
| -10 | 5  | -2 | 0.85  | 0.32 |
| -10 | 5  | -2 | 0.54  | 0.39 |
| -10 | 5  | -2 | 1.16  | 0.26 |
| -10 | 5  | -2 | 1.05  | 0.35 |
| 0   | 6  | -2 | 6.44  | 1.21 |
| 0   | -6 | 2  | 7.79  | 1.16 |
| 0   | 6  | -2 | 7.48  | 0.81 |
| 0   | -6 | -2 | 6.48  | 1.30 |
| 0   | 6  | 2  | 5.95  | 1.29 |
| 0   | -6 | -2 | 6.02  | 1.29 |
| 0   | -6 | 2  | 6.12  | 0.74 |
| 0   | -6 | 2  | 7.02  | 1.31 |
| 0   | 6  | -2 | 6.22  | 0.76 |
| 0   | 6  | -2 | 4.95  | 1.17 |
| 0   | 6  | -2 | 7.10  | 1.37 |
| 0   | 6  | 2  | 7.16  | 0.74 |
| 0   | -6 | 2  | 6.60  | 0.64 |
| 0   | 6  | 2  | 6.13  | 1.44 |
| 1   | 6  | -2 | 76.99 | 3.81 |
| -1  | 6  | 2  | 74.38 | 4.30 |
| 1   | 6  | -2 | 64.69 | 4.15 |
| 1   | -6 | 2  | 80.07 | 4.30 |
| -1  | 6  | 2  | 70.88 | 3.76 |
| -1  | -6 | -2 | 74.83 | 4.23 |



## CIF S3

|    |    |    |       |      |
|----|----|----|-------|------|
| -1 | -6 | -2 | 78.29 | 4.32 |
| 1  | 6  | -2 | 76.08 | 3.89 |
| 1  | -6 | 2  | 70.24 | 3.76 |
| 1  | -6 | 2  | 80.80 | 4.34 |
| -1 | 6  | 2  | 81.07 | 4.49 |
| 1  | 6  | -2 | 71.72 | 4.18 |
| 1  | 6  | -2 | 74.67 | 4.29 |
| -1 | -6 | -2 | 71.48 | 3.72 |
| -1 | 6  | -2 | 70.75 | 3.85 |
| 1  | -6 | -2 | 76.30 | 4.34 |
| -1 | 6  | -2 | 74.51 | 3.94 |
| 1  | -6 | -2 | 78.27 | 3.93 |
| -1 | -6 | 2  | 66.63 | 3.72 |
| 1  | -6 | -2 | 71.80 | 4.22 |
| 1  | 6  | 2  | 74.14 | 4.27 |
| -1 | -6 | 2  | 77.67 | 4.30 |
| -1 | -6 | 2  | 70.82 | 3.69 |
| 1  | 6  | 2  | 79.31 | 3.83 |
| -1 | 6  | -2 | 80.30 | 4.29 |
| 1  | 6  | 2  | 67.60 | 4.34 |
| -2 | 6  | 2  | 15.70 | 1.74 |
| 2  | 6  | -2 | 18.41 | 1.09 |
| 2  | 6  | -2 | 13.43 | 1.43 |
| 2  | 6  | -2 | 15.04 | 1.46 |
| 2  | -6 | 2  | 15.67 | 1.70 |
| 2  | -6 | 2  | 17.33 | 1.90 |
| -2 | 6  | 2  | 16.59 | 1.05 |
| -2 | -6 | -2 | 16.02 | 0.98 |
| 2  | -6 | 2  | 15.63 | 1.12 |
| -2 | -6 | -2 | 16.74 | 1.86 |
| 2  | 6  | 2  | 16.03 | 1.76 |
| -2 | -6 | 2  | 14.22 | 1.45 |
| -2 | 6  | -2 | 15.11 | 1.08 |
| 2  | 6  | 2  | 17.04 | 1.14 |
| -2 | 6  | -2 | 16.54 | 1.66 |
| 2  | -6 | -2 | 14.55 | 1.38 |
| 2  | 6  | 2  | 14.24 | 1.53 |
| -2 | -6 | 2  | 15.89 | 1.23 |
| -2 | -6 | 2  | 18.58 | 1.86 |
| -2 | 6  | -2 | 16.19 | 1.18 |
| 2  | -6 | -2 | 16.61 | 1.74 |

## CIF S3

|    |    |    |       |      |
|----|----|----|-------|------|
| -2 | -6 | 2  | 17.24 | 1.20 |
| -2 | 6  | -2 | 14.18 | 1.76 |
| 2  | -6 | -2 | 15.34 | 1.34 |
| -2 | -6 | 2  | 16.60 | 0.95 |
| 2  | -6 | -2 | 15.73 | 1.15 |
| -3 | 6  | 2  | 15.73 | 1.11 |
| 3  | -6 | 2  | 20.14 | 2.01 |
| 3  | -6 | 2  | 15.70 | 1.23 |
| 3  | -6 | 2  | 16.28 | 1.14 |
| -3 | -6 | -2 | 14.56 | 1.08 |
| 3  | -6 | 2  | 17.23 | 1.84 |
| -3 | -6 | -2 | 16.29 | 0.99 |
| -3 | -6 | -2 | 17.08 | 1.83 |
| 3  | 6  | -2 | 17.73 | 1.09 |
| -3 | -6 | 2  | 15.89 | 1.84 |
| 3  | 6  | 2  | 17.16 | 1.14 |
| -3 | 6  | -2 | 15.85 | 1.76 |
| -3 | 6  | -2 | 18.25 | 1.22 |
| -3 | -6 | 2  | 16.12 | 0.95 |
| 3  | -6 | -2 | 12.93 | 1.73 |
| 3  | 6  | 2  | 16.94 | 1.83 |
| -3 | -6 | 2  | 15.06 | 1.37 |
| -3 | 6  | -2 | 15.95 | 1.22 |
| -3 | -6 | 2  | 15.65 | 1.15 |
| -3 | -6 | 2  | 15.81 | 0.94 |
| -3 | 6  | -2 | 15.17 | 1.10 |
| 3  | -6 | -2 | 14.47 | 1.34 |
| 3  | -6 | -2 | 13.22 | 1.32 |
| -3 | -6 | 2  | 15.24 | 1.00 |
| -4 | -6 | -2 | 5.27  | 0.85 |
| -4 | -6 | -2 | 5.59  | 0.60 |
| -4 | -6 | -2 | 4.29  | 0.88 |
| -4 | -6 | -2 | 4.75  | 0.74 |
| 4  | -6 | 2  | 4.26  | 0.87 |
| -4 | 6  | 2  | 5.21  | 0.77 |
| -4 | -6 | -2 | 7.35  | 2.17 |
| -4 | 6  | 2  | 4.91  | 0.80 |
| -4 | 6  | 2  | 4.74  | 0.67 |
| 4  | -6 | -2 | 4.52  | 0.99 |
| -4 | 6  | -2 | 4.33  | 0.73 |
| 4  | -6 | -2 | 4.58  | 0.88 |

## CIF S3

|    |    |    |       |      |
|----|----|----|-------|------|
| 4  | -6 | -2 | 5.79  | 1.39 |
| 4  | 6  | 2  | 5.90  | 0.78 |
| -4 | 6  | -2 | 4.20  | 0.91 |
| -4 | -6 | 2  | 5.13  | 0.47 |
| -4 | -6 | 2  | 5.60  | 0.86 |
| -4 | -6 | 2  | 4.98  | 0.61 |
| -4 | -6 | 2  | 5.82  | 0.70 |
| -5 | -6 | -2 | 12.11 | 0.84 |
| 5  | -6 | 2  | 10.42 | 1.14 |
| -5 | -6 | -2 | 12.77 | 0.86 |
| -5 | -6 | -2 | 9.89  | 0.92 |
| -5 | -6 | -2 | 12.15 | 1.12 |
| -5 | 6  | 2  | 12.64 | 0.97 |
| -5 | -6 | -2 | 10.35 | 1.12 |
| -5 | -6 | -2 | 9.28  | 1.39 |
| -5 | 6  | 2  | 12.61 | 0.92 |
| -5 | -6 | -2 | 9.49  | 1.22 |
| 5  | -6 | -2 | 8.80  | 1.31 |
| -5 | -6 | 2  | 12.14 | 0.78 |
| -5 | -6 | 2  | 11.39 | 0.82 |
| -5 | 6  | -2 | 13.08 | 1.10 |
| -5 | -6 | 2  | 10.54 | 1.07 |
| -5 | 6  | -2 | 12.51 | 1.02 |
| 5  | 6  | 2  | 12.42 | 1.08 |
| -5 | 6  | -2 | 12.43 | 1.05 |
| 5  | -6 | -2 | 12.06 | 1.23 |
| -5 | -6 | 2  | 11.22 | 1.09 |
| -5 | -6 | 2  | 12.40 | 0.64 |
| -6 | 6  | 2  | 3.20  | 0.72 |
| -6 | -6 | -2 | 4.83  | 0.96 |
| -6 | -6 | -2 | 1.59  | 0.96 |
| -6 | 6  | 2  | 4.10  | 0.86 |
| -6 | -6 | -2 | 5.28  | 0.73 |
| -6 | -6 | -2 | 3.20  | 0.82 |
| -6 | -6 | -2 | 3.37  | 0.54 |
| 6  | -6 | 2  | 5.50  | 1.08 |
| -6 | -6 | -2 | 3.88  | 0.57 |
| 6  | -6 | -2 | 3.78  | 1.17 |
| 6  | 6  | 2  | 3.27  | 0.86 |
| -6 | -6 | 2  | 3.57  | 0.90 |
| -6 | 6  | -2 | 3.97  | 0.94 |

## CIF S3

|    |    |    |      |      |
|----|----|----|------|------|
| -6 | -6 | 2  | 3.71 | 0.59 |
| -6 | 6  | -2 | 3.41 | 0.80 |
| -6 | -6 | 2  | 2.68 | 0.87 |
| -6 | -6 | 2  | 2.88 | 0.56 |
| 6  | -6 | -2 | 3.36 | 1.00 |
| -7 | 6  | 2  | 6.74 | 0.87 |
| -7 | -6 | -2 | 6.83 | 0.84 |
| -7 | 6  | 2  | 7.06 | 0.86 |
| -7 | 6  | 2  | 6.98 | 0.89 |
| -7 | 6  | 2  | 7.16 | 0.96 |
| -7 | 6  | 2  | 7.67 | 0.95 |
| -7 | 6  | 2  | 8.09 | 1.00 |
| -7 | 6  | 2  | 8.95 | 1.02 |
| -7 | -6 | -2 | 7.01 | 0.83 |
| -7 | -6 | -2 | 8.71 | 0.94 |
| -7 | -6 | -2 | 8.95 | 0.81 |
| -7 | -6 | -2 | 8.40 | 1.11 |
| -7 | -6 | -2 | 8.41 | 1.41 |
| -7 | 6  | -2 | 8.11 | 1.10 |
| -7 | 6  | -2 | 9.66 | 1.05 |
| -7 | 6  | -2 | 6.42 | 1.11 |
| -7 | 6  | -2 | 7.99 | 0.99 |
| -7 | 6  | -2 | 8.99 | 1.29 |
| -7 | 6  | -2 | 7.78 | 0.97 |
| -7 | -6 | 2  | 7.51 | 1.16 |
| -7 | -6 | 2  | 8.10 | 0.67 |
| -7 | -6 | 2  | 7.55 | 0.59 |
| -7 | 6  | -2 | 8.43 | 0.97 |
| -7 | -6 | 2  | 5.68 | 0.41 |
| -8 | -6 | -2 | 1.12 | 0.44 |
| -8 | 6  | 2  | 1.43 | 0.47 |
| -8 | 6  | 2  | 1.68 | 0.51 |
| -8 | 6  | 2  | 1.66 | 0.67 |
| -8 | -6 | -2 | 1.40 | 0.43 |
| -8 | 6  | 2  | 1.79 | 0.49 |
| -8 | 6  | 2  | 1.49 | 0.53 |
| -8 | -6 | 2  | 2.40 | 0.36 |
| -8 | 6  | -2 | 1.89 | 0.57 |
| -8 | -6 | 2  | 1.76 | 0.26 |
| -8 | 6  | -2 | 1.42 | 0.53 |
| -8 | 6  | -2 | 1.85 | 0.82 |

## CIF S3

|     |    |    |        |      |
|-----|----|----|--------|------|
| -8  | 6  | -2 | 0.63   | 0.56 |
| -8  | -6 | 2  | 1.84   | 0.38 |
| -8  | 6  | -2 | 2.02   | 0.55 |
| -8  | 6  | -2 | 2.10   | 0.59 |
| -8  | 6  | -2 | 2.10   | 0.73 |
| -8  | 6  | -2 | 2.03   | 0.56 |
| -9  | 6  | 2  | 2.91   | 0.57 |
| -9  | 6  | 2  | 3.11   | 0.48 |
| -9  | 6  | 2  | 3.50   | 0.73 |
| -9  | 6  | 2  | 3.53   | 0.66 |
| -9  | 6  | -2 | 3.66   | 0.67 |
| -9  | 6  | -2 | 3.57   | 0.68 |
| -9  | 6  | -2 | 3.69   | 0.68 |
| -9  | 6  | -2 | 2.85   | 0.65 |
| -9  | 6  | -2 | 2.54   | 0.59 |
| -10 | 6  | 2  | 0.80   | 0.29 |
| -10 | 6  | 2  | 1.29   | 0.33 |
| -10 | 6  | 2  | 0.55   | 0.20 |
| -10 | 6  | -2 | 0.48   | 0.31 |
| -10 | 6  | -2 | 0.89   | 0.24 |
| -10 | 6  | -2 | 1.01   | 0.29 |
| -10 | 6  | -2 | 1.81   | 0.44 |
| 0   | 7  | -2 | 93.10  | 4.79 |
| 0   | -7 | -2 | 85.05  | 5.26 |
| 0   | 7  | 2  | 94.95  | 4.77 |
| 0   | 7  | 2  | 98.21  | 5.46 |
| 0   | 7  | 2  | 94.92  | 4.70 |
| 0   | -7 | -2 | 89.16  | 5.30 |
| 0   | -7 | 2  | 94.39  | 4.69 |
| 0   | 7  | -2 | 90.97  | 4.84 |
| 0   | -7 | 2  | 92.52  | 5.31 |
| 0   | 7  | 2  | 91.45  | 6.25 |
| 0   | 7  | -2 | 100.07 | 5.44 |
| -1  | 7  | 2  | 11.99  | 1.64 |
| 1   | 7  | -2 | 19.05  | 1.22 |
| 1   | -7 | 2  | 18.14  | 1.19 |
| -1  | 7  | 2  | 16.68  | 1.96 |
| 1   | -7 | 2  | 17.18  | 1.81 |
| 1   | 7  | -2 | 19.00  | 1.94 |
| -1  | 7  | 2  | 18.72  | 1.17 |
| -1  | -7 | -2 | 20.07  | 2.04 |

## CIF S3

|    |    |    |       |      |
|----|----|----|-------|------|
| -1 | -7 | -2 | 17.58 | 1.08 |
| 1  | -7 | 2  | 15.41 | 1.75 |
| 1  | 7  | -2 | 18.58 | 1.27 |
| -1 | 7  | -2 | 17.08 | 1.17 |
| 1  | 7  | 2  | 19.24 | 1.23 |
| -1 | -7 | 2  | 18.14 | 1.12 |
| -1 | 7  | -2 | 17.91 | 1.28 |
| 1  | -7 | -2 | 18.51 | 1.88 |
| -1 | -7 | 2  | 17.86 | 1.84 |
| -1 | -7 | 2  | 17.37 | 1.09 |
| 1  | 7  | 2  | 11.97 | 1.84 |
| 1  | -7 | -2 | 16.14 | 1.83 |
| 1  | -7 | -2 | 19.52 | 1.25 |
| 2  | -7 | 2  | 28.85 | 2.49 |
| 2  | -7 | 2  | 25.16 | 2.33 |
| 2  | 7  | -2 | 30.73 | 1.76 |
| 2  | 7  | -2 | 29.25 | 1.85 |
| -2 | 7  | 2  | 27.93 | 2.40 |
| -2 | -7 | -2 | 29.91 | 1.64 |
| -2 | -7 | -2 | 29.52 | 1.61 |
| -2 | 7  | 2  | 30.18 | 1.68 |
| 2  | -7 | 2  | 29.20 | 1.73 |
| -2 | -7 | -2 | 30.49 | 2.51 |
| -2 | -7 | 2  | 27.89 | 1.65 |
| -2 | -7 | 2  | 31.27 | 1.83 |
| 2  | 7  | 2  | 31.34 | 1.80 |
| -2 | -7 | 2  | 30.11 | 2.52 |
| 2  | 7  | 2  | 29.40 | 2.46 |
| -2 | -7 | 2  | 32.99 | 1.60 |
| 2  | -7 | -2 | 30.80 | 1.75 |
| 2  | -7 | -2 | 24.85 | 1.84 |
| -2 | 7  | -2 | 30.83 | 1.71 |
| 2  | -7 | -2 | 24.41 | 2.33 |
| -2 | 7  | -2 | 29.84 | 1.81 |
| -2 | 7  | -2 | 30.05 | 2.49 |
| 3  | 7  | -2 | 22.92 | 1.36 |
| -3 | -7 | -2 | 22.02 | 1.23 |
| -3 | -7 | -2 | 21.43 | 1.34 |
| 3  | -7 | 2  | 15.57 | 2.14 |
| -3 | -7 | -2 | 21.19 | 1.40 |
| 3  | -7 | 2  | 21.34 | 1.41 |

## CIF S3

|    |    |    |       |      |
|----|----|----|-------|------|
| -3 | 7  | 2  | 20.28 | 1.32 |
| -3 | -7 | 2  | 21.00 | 1.21 |
| -3 | 7  | -2 | 21.67 | 1.53 |
| -3 | 7  | -2 | 22.48 | 1.38 |
| -3 | 7  | -2 | 23.04 | 1.43 |
| -3 | -7 | 2  | 20.79 | 1.22 |
| -3 | -7 | 2  | 22.92 | 1.43 |
| -3 | -7 | 2  | 20.59 | 1.26 |
| 3  | 7  | 2  | 22.12 | 2.17 |
| -3 | -7 | 2  | 19.41 | 2.14 |
| -3 | -7 | 2  | 18.29 | 1.45 |
| 3  | 7  | 2  | 22.12 | 1.39 |
| 3  | -7 | -2 | 19.59 | 1.70 |
| 3  | -7 | -2 | 20.57 | 1.63 |
| -3 | 7  | -2 | 20.51 | 2.12 |
| -4 | -7 | -2 | 17.72 | 1.04 |
| 4  | -7 | 2  | 15.74 | 1.41 |
| -4 | -7 | -2 | 15.83 | 1.09 |
| -4 | -7 | -2 | 15.39 | 1.25 |
| -4 | 7  | 2  | 15.67 | 1.23 |
| -4 | -7 | -2 | 15.61 | 1.31 |
| -4 | 7  | 2  | 16.11 | 1.16 |
| 4  | 7  | -2 | 15.96 | 1.16 |
| -4 | -7 | -2 | 12.47 | 1.37 |
| 4  | -7 | -2 | 11.26 | 1.40 |
| -4 | -7 | 2  | 15.03 | 1.21 |
| -4 | 7  | -2 | 15.19 | 1.16 |
| -4 | -7 | 2  | 15.74 | 0.94 |
| -4 | -7 | 2  | 16.65 | 1.16 |
| 4  | 7  | 2  | 16.15 | 1.21 |
| -4 | -7 | 2  | 16.27 | 1.07 |
| -4 | -7 | 2  | 13.83 | 1.20 |
| -4 | 7  | -2 | 17.90 | 1.33 |
| 4  | -7 | -2 | 14.64 | 1.42 |
| -5 | -7 | -2 | 4.61  | 0.82 |
| -5 | -7 | -2 | 4.06  | 0.87 |
| -5 | -7 | -2 | 3.90  | 0.68 |
| -5 | -7 | -2 | 3.09  | 0.92 |
| 5  | 7  | -2 | 3.11  | 0.76 |
| -5 | -7 | -2 | 4.30  | 0.91 |
| -5 | 7  | 2  | 4.53  | 0.84 |

## CIF S3

|    |    |    |      |      |
|----|----|----|------|------|
| -5 | 7  | 2  | 4.61 | 0.83 |
| -5 | -7 | -2 | 4.04 | 0.64 |
| 5  | -7 | 2  | 2.25 | 0.98 |
| 5  | -7 | -2 | 4.36 | 1.13 |
| -5 | -7 | 2  | 4.56 | 0.98 |
| -5 | -7 | 2  | 4.17 | 0.97 |
| -5 | -7 | 2  | 3.54 | 0.40 |
| -5 | 7  | -2 | 3.91 | 0.89 |
| 5  | 7  | 2  | 3.38 | 0.82 |
| -5 | 7  | -2 | 3.53 | 0.91 |
| -5 | -7 | 2  | 3.77 | 0.40 |
| -5 | -7 | 2  | 3.53 | 0.59 |
| -5 | 7  | -2 | 3.64 | 0.79 |
| -5 | -7 | 2  | 3.43 | 0.90 |
| -5 | -7 | 2  | 3.21 | 0.66 |
| 5  | -7 | -2 | 4.03 | 1.25 |
| -6 | -7 | -2 | 5.26 | 0.60 |
| -6 | -7 | -2 | 5.65 | 0.83 |
| -6 | -7 | -2 | 4.33 | 0.88 |
| 6  | -7 | 2  | 4.75 | 1.14 |
| -6 | -7 | -2 | 5.82 | 0.62 |
| -6 | 7  | 2  | 5.66 | 0.82 |
| -6 | 7  | 2  | 5.07 | 0.99 |
| -6 | -7 | -2 | 4.49 | 1.09 |
| -6 | -7 | -2 | 3.88 | 1.00 |
| -6 | -7 | 2  | 5.17 | 1.09 |
| 6  | -7 | -2 | 4.57 | 1.13 |
| -6 | -7 | 2  | 6.18 | 0.67 |
| -6 | -7 | 2  | 4.55 | 0.66 |
| -6 | 7  | -2 | 4.78 | 1.00 |
| -6 | 7  | -2 | 4.77 | 1.12 |
| 6  | 7  | 2  | 4.62 | 0.90 |
| -6 | -7 | 2  | 5.36 | 1.03 |
| -7 | 7  | 2  | 0.84 | 0.61 |
| -7 | 7  | 2  | 0.75 | 0.53 |
| -7 | -7 | -2 | 0.80 | 0.44 |
| -7 | 7  | 2  | 1.01 | 0.77 |
| -7 | 7  | 2  | 0.56 | 0.56 |
| -7 | -7 | -2 | 1.21 | 0.50 |
| -7 | 7  | 2  | 0.54 | 0.59 |
| -7 | -7 | -2 | 0.28 | 0.95 |



## CIF S3

|    |    |    |       |      |
|----|----|----|-------|------|
| -7 | -7 | -2 | 0.03  | 0.52 |
| -7 | 7  | 2  | 0.54  | 0.71 |
| -7 | 7  | 2  | 0.78  | 0.55 |
| -7 | -7 | -2 | 0.33  | 0.94 |
| -7 | 7  | 2  | 1.90  | 0.68 |
| -7 | -7 | 2  | 1.17  | 0.46 |
| -7 | -7 | 2  | 1.05  | 0.33 |
| -7 | -7 | 2  | 0.78  | 0.72 |
| -7 | 7  | -2 | 2.37  | 0.66 |
| -7 | 7  | -2 | 0.42  | 0.60 |
| -7 | 7  | -2 | 1.27  | 0.61 |
| -7 | 7  | -2 | 1.95  | 0.65 |
| -7 | -7 | 2  | 0.09  | 0.97 |
| -7 | -7 | 2  | 0.52  | 0.15 |
| -7 | 7  | -2 | 1.84  | 0.90 |
| -7 | -7 | 2  | 1.05  | 0.54 |
| -7 | -7 | 2  | 0.61  | 0.44 |
| -8 | -7 | -2 | 6.47  | 0.63 |
| -8 | 7  | 2  | 5.57  | 0.72 |
| -8 | 7  | 2  | 6.83  | 0.81 |
| -8 | 7  | 2  | 5.29  | 0.82 |
| -8 | 7  | 2  | 6.80  | 0.84 |
| -8 | -7 | 2  | 6.53  | 0.45 |
| -8 | 7  | -2 | 6.46  | 0.77 |
| -8 | -7 | 2  | 5.03  | 0.53 |
| -8 | 7  | -2 | 5.68  | 0.85 |
| -8 | 7  | -2 | 3.19  | 0.88 |
| -8 | 7  | -2 | 5.55  | 0.90 |
| -8 | 7  | -2 | 5.67  | 0.82 |
| -8 | 7  | -2 | 5.64  | 0.91 |
| -8 | -7 | 2  | 6.62  | 0.47 |
| -8 | 7  | -2 | 5.65  | 0.82 |
| -9 | 7  | 2  | 0.31  | 0.34 |
| -9 | 7  | 2  | -0.06 | 0.39 |
| -9 | -7 | -2 | 0.35  | 0.24 |
| -9 | 7  | 2  | 0.02  | 0.29 |
| -9 | 7  | 2  | 0.01  | 0.39 |
| -9 | -7 | -2 | 0.64  | 0.28 |
| -9 | 7  | -2 | 0.43  | 0.40 |
| -9 | 7  | -2 | 0.74  | 0.40 |
| -9 | 7  | -2 | 0.16  | 0.38 |

## CIF S3

|    |    |    |       |      |
|----|----|----|-------|------|
| -9 | 7  | -2 | 0.40  | 0.33 |
| -9 | 7  | -2 | 0.42  | 0.38 |
| 0  | -8 | 2  | 21.07 | 1.37 |
| 0  | 8  | -2 | 23.23 | 2.26 |
| 0  | 8  | 2  | 17.83 | 2.16 |
| 0  | -8 | -2 | 20.07 | 2.22 |
| 0  | 8  | -2 | 20.58 | 1.49 |
| 0  | -8 | 2  | 15.49 | 2.01 |
| 0  | -8 | -2 | 21.07 | 1.36 |
| 0  | 8  | 2  | 21.71 | 1.31 |
| 0  | -8 | -2 | 17.56 | 1.90 |
| 0  | 8  | -2 | 18.97 | 1.55 |
| 0  | -8 | 2  | 20.82 | 1.40 |
| 1  | -8 | 2  | 6.56  | 1.48 |
| 1  | 8  | -2 | 5.49  | 0.84 |
| -1 | -8 | -2 | 4.00  | 1.52 |
| -1 | -8 | -2 | 5.75  | 0.84 |
| 1  | 8  | -2 | 3.07  | 1.48 |
| 1  | -8 | 2  | 4.98  | 1.38 |
| 1  | -8 | 2  | 4.79  | 0.82 |
| -1 | -8 | -2 | 4.16  | 0.96 |
| 1  | -8 | 2  | 4.58  | 0.82 |
| 1  | 8  | -2 | 5.94  | 0.88 |
| -1 | 8  | 2  | 4.26  | 0.76 |
| -1 | -8 | 2  | 5.27  | 0.76 |
| -1 | 8  | -2 | 5.50  | 0.79 |
| -1 | -8 | 2  | 5.18  | 0.82 |
| -1 | -8 | 2  | 10.85 | 2.81 |
| -1 | -8 | 2  | 5.74  | 0.82 |
| 1  | 8  | 2  | 6.01  | 1.11 |
| 1  | -8 | -2 | 5.58  | 0.91 |
| 1  | -8 | -2 | 1.70  | 1.10 |
| 1  | 8  | 2  | 5.39  | 0.79 |
| -1 | 8  | -2 | 7.86  | 2.66 |
| -2 | -8 | -2 | 2.68  | 0.82 |
| -2 | -8 | -2 | 2.51  | 0.68 |
| -2 | -8 | -2 | 1.92  | 0.55 |
| 2  | 8  | -2 | 2.13  | 0.78 |
| -2 | 8  | 2  | 2.00  | 0.60 |
| 2  | 8  | -2 | 2.34  | 0.75 |
| 2  | -8 | 2  | 1.41  | 0.73 |

## CIF S3

|    |    |    |       |      |
|----|----|----|-------|------|
| 2  | -8 | -2 | 2.03  | 0.71 |
| 2  | 8  | 2  | 3.09  | 0.75 |
| -2 | -8 | 2  | 1.92  | 0.59 |
| -2 | 8  | -2 | 2.66  | 0.75 |
| -2 | 8  | -2 | 2.78  | 0.65 |
| -2 | -8 | 2  | 3.81  | 0.75 |
| -3 | -8 | -2 | 10.54 | 0.99 |
| 3  | 8  | -2 | 9.41  | 1.09 |
| -3 | -8 | -2 | 10.34 | 0.87 |
| -3 | -8 | -2 | 8.36  | 0.93 |
| -3 | -8 | -2 | 11.63 | 1.10 |
| 3  | 8  | -2 | 10.30 | 1.03 |
| -3 | -8 | -2 | 9.42  | 0.91 |
| 3  | -8 | 2  | 10.87 | 1.08 |
| -3 | 8  | 2  | 10.29 | 0.94 |
| -3 | -8 | -2 | 9.00  | 1.09 |
| -3 | -8 | 2  | 8.66  | 1.01 |
| -3 | 8  | -2 | 10.33 | 1.16 |
| 3  | -8 | -2 | 6.49  | 1.25 |
| -3 | -8 | 2  | 8.61  | 1.15 |
| -3 | 8  | -2 | 10.24 | 1.00 |
| 3  | 8  | 2  | 10.58 | 1.08 |
| -3 | 8  | -2 | 10.38 | 1.13 |
| -3 | -8 | 2  | 10.82 | 1.06 |
| -3 | -8 | 2  | 9.84  | 0.86 |
| -4 | -8 | -2 | 19.40 | 1.27 |
| 4  | 8  | -2 | 16.38 | 1.38 |
| -4 | 8  | 2  | 18.93 | 1.40 |
| -4 | -8 | -2 | 18.67 | 1.47 |
| -4 | -8 | -2 | 18.55 | 1.34 |
| -4 | 8  | 2  | 20.23 | 1.44 |
| -4 | 8  | 2  | 18.94 | 1.32 |
| -4 | -8 | -2 | 19.19 | 1.44 |
| -4 | -8 | -2 | 19.43 | 1.21 |
| -4 | -8 | 2  | 19.94 | 1.14 |
| 4  | -8 | -2 | 19.60 | 1.67 |
| -4 | -8 | 2  | 19.60 | 1.37 |
| -4 | -8 | 2  | 14.07 | 1.34 |
| -4 | -8 | 2  | 18.68 | 1.39 |
| -4 | 8  | -2 | 21.36 | 1.53 |
| 4  | 8  | 2  | 18.09 | 1.43 |

## CIF S3

|    |    |    |       |      |
|----|----|----|-------|------|
| -4 | 8  | -2 | 18.82 | 1.43 |
| -4 | 8  | -2 | 17.14 | 1.29 |
| -4 | -8 | 2  | 21.76 | 1.24 |
| -4 | -8 | 2  | 19.74 | 1.41 |
| -4 | -8 | 2  | 20.28 | 1.19 |
| -5 | -8 | -2 | 16.90 | 1.41 |
| -5 | -8 | -2 | 15.45 | 0.91 |
| -5 | -8 | -2 | 16.40 | 1.20 |
| -5 | -8 | -2 | 10.98 | 1.34 |
| -5 | -8 | -2 | 15.16 | 1.24 |
| -5 | -8 | -2 | 16.83 | 1.36 |
| -5 | -8 | -2 | 17.61 | 1.05 |
| 5  | 8  | -2 | 12.61 | 1.24 |
| -5 | 8  | 2  | 15.30 | 1.21 |
| -5 | -8 | -2 | 16.90 | 1.13 |
| -5 | 8  | 2  | 15.98 | 1.14 |
| -5 | 8  | -2 | 17.14 | 1.33 |
| -5 | 8  | -2 | 15.13 | 1.36 |
| -5 | 8  | -2 | 16.32 | 1.26 |
| -5 | -8 | 2  | 14.29 | 1.06 |
| 5  | -8 | -2 | 11.91 | 1.49 |
| -5 | -8 | 2  | 15.36 | 1.46 |
| -5 | -8 | 2  | 13.96 | 1.31 |
| 5  | 8  | 2  | 12.02 | 1.27 |
| -5 | -8 | 2  | 18.43 | 1.12 |
| -5 | -8 | 2  | 16.60 | 0.88 |
| -5 | -8 | 2  | 14.54 | 0.92 |
| -5 | -8 | 2  | 14.61 | 1.06 |
| -5 | -8 | 2  | 14.32 | 1.26 |
| -6 | 8  | 2  | 10.62 | 1.19 |
| -6 | 8  | 2  | 11.64 | 0.98 |
| -6 | -8 | -2 | 8.16  | 0.81 |
| -6 | -8 | -2 | 10.66 | 1.28 |
| -6 | 8  | 2  | 11.63 | 1.12 |
| -6 | 8  | 2  | 12.74 | 1.09 |
| -6 | -8 | -2 | 7.61  | 0.85 |
| -6 | -8 | -2 | 10.15 | 1.00 |
| -6 | 8  | 2  | 11.96 | 1.17 |
| -6 | 8  | 2  | 10.47 | 1.08 |
| -6 | 8  | 2  | 11.88 | 1.31 |
| -6 | -8 | -2 | 10.78 | 0.96 |

## CIF S3

|    |    |    |       |      |
|----|----|----|-------|------|
| -6 | -8 | -2 | 10.66 | 1.06 |
| -6 | -8 | -2 | 13.24 | 1.26 |
| -6 | 8  | 2  | 11.91 | 1.13 |
| -6 | 8  | -2 | 10.42 | 0.99 |
| -6 | -8 | 2  | 11.28 | 0.84 |
| -6 | -8 | 2  | 11.20 | 0.91 |
| -6 | 8  | -2 | 8.23  | 1.06 |
| -6 | -8 | 2  | 9.57  | 0.78 |
| -6 | -8 | 2  | 13.09 | 1.30 |
| -6 | 8  | -2 | 11.70 | 1.36 |
| -6 | 8  | -2 | 10.97 | 1.16 |
| -6 | -8 | 2  | 12.00 | 1.14 |
| -6 | 8  | -2 | 11.84 | 0.86 |
| -6 | 8  | -2 | 10.06 | 1.03 |
| -6 | -8 | 2  | 10.66 | 0.91 |
| -6 | -8 | 2  | 11.07 | 0.85 |
| -6 | -8 | 2  | 11.46 | 0.81 |
| -7 | -8 | -2 | 4.72  | 0.75 |
| -7 | -8 | -2 | 6.90  | 1.24 |
| -7 | 8  | 2  | 5.55  | 0.83 |
| -7 | 8  | 2  | 3.29  | 0.90 |
| -7 | 8  | 2  | 5.30  | 0.87 |
| -7 | -8 | -2 | 5.16  | 0.78 |
| -7 | 8  | 2  | 4.66  | 0.85 |
| -7 | -8 | -2 | 4.89  | 0.76 |
| -7 | -8 | -2 | 4.66  | 0.72 |
| -7 | 8  | 2  | 4.88  | 0.82 |
| -7 | 8  | 2  | 3.69  | 0.91 |
| -7 | 8  | 2  | 3.91  | 1.04 |
| -7 | -8 | -2 | 5.30  | 1.25 |
| -7 | 8  | 2  | 3.88  | 0.87 |
| -7 | 8  | -2 | 4.21  | 0.94 |
| -7 | -8 | 2  | 5.50  | 0.79 |
| -7 | -8 | 2  | 4.06  | 1.05 |
| -7 | 8  | -2 | 4.59  | 0.92 |
| -7 | -8 | 2  | 5.21  | 1.19 |
| -7 | 8  | -2 | 4.08  | 0.86 |
| -7 | -8 | 2  | 4.32  | 0.57 |
| -7 | 8  | -2 | 4.52  | 1.17 |
| -8 | 8  | 2  | 1.41  | 0.49 |
| -8 | 8  | 2  | 0.90  | 0.44 |

## CIF S3

|    |    |    |       |      |
|----|----|----|-------|------|
| 8  | -8 | 2  | 1.27  | 0.89 |
| -8 | -8 | -2 | 2.33  | 0.44 |
| -8 | -8 | -2 | 2.31  | 0.64 |
| -8 | -8 | -2 | 2.19  | 0.55 |
| -8 | 8  | 2  | 1.16  | 0.50 |
| -8 | 8  | -2 | 1.85  | 0.53 |
| -8 | -8 | 2  | 2.07  | 0.35 |
| -8 | 8  | -2 | 2.11  | 0.45 |
| -8 | 8  | -2 | 1.07  | 0.75 |
| -8 | 8  | -2 | 1.20  | 0.51 |
| -8 | -8 | 2  | 1.94  | 0.33 |
| -8 | -8 | 2  | 1.79  | 0.38 |
| -8 | 8  | -2 | 1.07  | 0.56 |
| -8 | 8  | -2 | 0.94  | 0.53 |
| -9 | 8  | 2  | 0.48  | 0.33 |
| -9 | 8  | 2  | 0.32  | 0.25 |
| -9 | -8 | -2 | 0.26  | 0.21 |
| 9  | -8 | 2  | 0.29  | 0.44 |
| -9 | 8  | 2  | 0.40  | 0.31 |
| -9 | -8 | -2 | 0.26  | 0.20 |
| -9 | 8  | 2  | 0.91  | 0.35 |
| -9 | 8  | -2 | 0.44  | 0.36 |
| -9 | 8  | -2 | 0.30  | 0.28 |
| -9 | 8  | -2 | 0.46  | 0.34 |
| -9 | 8  | -2 | 0.33  | 0.34 |
| 0  | 9  | -2 | 4.58  | 1.05 |
| 0  | -9 | 2  | 2.21  | 0.69 |
| 0  | -9 | 2  | 3.59  | 0.82 |
| 0  | 9  | 2  | 3.20  | 0.80 |
| 0  | -9 | -2 | 3.43  | 0.91 |
| -1 | -9 | -2 | 24.57 | 1.64 |
| -1 | -9 | -2 | 24.47 | 1.63 |
| 1  | 9  | -2 | 27.59 | 1.81 |
| 1  | -9 | 2  | 24.29 | 1.56 |
| 1  | -9 | 2  | 26.15 | 1.66 |
| -1 | 9  | 2  | 27.62 | 1.65 |
| 1  | 9  | -2 | 21.90 | 1.81 |
| 1  | 9  | 2  | 24.24 | 1.72 |
| -1 | -9 | 2  | 25.97 | 1.57 |
| -1 | -9 | 2  | 24.98 | 1.62 |
| -1 | -9 | 2  | 27.94 | 1.62 |

## CIF S3

|    |    |    |       |      |
|----|----|----|-------|------|
| 1  | -9 | -2 | 28.13 | 1.78 |
| -1 | 9  | -2 | 28.65 | 1.72 |
| -2 | -9 | -2 | 6.95  | 1.02 |
| -2 | -9 | -2 | 6.86  | 0.91 |
| 2  | 9  | -2 | 6.15  | 1.10 |
| -2 | 9  | 2  | 6.27  | 0.89 |
| 2  | -9 | 2  | 7.45  | 1.03 |
| -2 | -9 | -2 | 5.76  | 0.78 |
| 2  | 9  | -2 | 6.30  | 1.02 |
| -2 | -9 | -2 | 5.58  | 0.98 |
| 2  | 9  | 2  | 6.95  | 1.04 |
| 2  | -9 | -2 | 6.58  | 1.06 |
| -2 | -9 | 2  | 7.02  | 0.89 |
| -2 | -9 | 2  | 6.59  | 0.98 |
| 2  | 9  | 2  | 7.15  | 1.03 |
| -2 | -9 | 2  | 6.89  | 0.88 |
| -2 | 9  | -2 | 6.78  | 1.10 |
| -2 | 9  | -2 | 6.95  | 1.04 |
| -2 | -9 | 2  | 6.28  | 0.95 |
| -3 | -9 | -2 | 5.18  | 1.01 |
| -3 | 9  | 2  | 7.89  | 0.95 |
| 3  | 9  | -2 | 6.15  | 1.08 |
| -3 | -9 | -2 | 8.51  | 0.81 |
| -3 | -9 | -2 | 6.02  | 1.01 |
| -3 | 9  | 2  | 7.91  | 0.97 |
| 3  | 9  | -2 | 5.80  | 1.01 |
| -3 | -9 | -2 | 8.44  | 1.24 |
| -3 | -9 | -2 | 7.45  | 0.91 |
| -3 | -9 | -2 | 6.32  | 1.02 |
| 3  | -9 | 2  | 7.10  | 1.08 |
| -3 | -9 | 2  | 5.28  | 1.03 |
| -3 | 9  | -2 | 7.95  | 1.14 |
| -3 | -9 | 2  | 5.83  | 1.09 |
| -3 | -9 | 2  | 5.75  | 0.96 |
| 3  | 9  | 2  | 7.27  | 1.08 |
| -3 | 9  | -2 | 7.28  | 1.00 |
| -3 | -9 | 2  | 7.18  | 1.09 |
| -3 | -9 | 2  | 6.60  | 0.85 |
| -3 | 9  | -2 | 6.38  | 1.05 |
| -3 | -9 | 2  | 7.66  | 0.85 |
| 4  | 9  | -2 | 13.70 | 1.24 |

## CIF S3

|    |    |    |       |      |
|----|----|----|-------|------|
| -4 | -9 | -2 | 11.65 | 1.23 |
| -4 | 9  | 2  | 13.51 | 1.22 |
| -4 | -9 | -2 | 11.96 | 1.14 |
| 4  | -9 | 2  | 11.76 | 1.32 |
| -4 | 9  | 2  | 14.33 | 1.11 |
| -4 | -9 | -2 | 13.28 | 1.28 |
| -4 | -9 | -2 | 12.72 | 1.18 |
| -4 | -9 | -2 | 11.59 | 1.05 |
| -4 | -9 | -2 | 11.24 | 1.18 |
| -4 | 9  | 2  | 12.58 | 1.13 |
| -4 | -9 | -2 | 12.84 | 1.01 |
| -4 | -9 | 2  | 14.57 | 1.18 |
| -4 | -9 | 2  | 11.54 | 1.19 |
| -4 | 9  | -2 | 12.52 | 1.16 |
| -4 | -9 | 2  | 12.00 | 1.05 |
| 4  | 9  | 2  | 10.92 | 1.25 |
| -4 | -9 | 2  | 13.61 | 1.27 |
| -4 | 9  | -2 | 12.55 | 1.34 |
| -4 | -9 | 2  | 12.16 | 1.20 |
| -4 | -9 | 2  | 12.50 | 0.90 |
| -4 | -9 | 2  | 13.35 | 1.09 |
| -5 | -9 | -2 | 1.10  | 0.53 |
| -5 | -9 | -2 | 2.45  | 0.75 |
| -5 | 9  | 2  | 1.36  | 0.69 |
| -5 | -9 | -2 | 2.95  | 1.02 |
| -5 | -9 | -2 | 1.17  | 0.84 |
| -5 | -9 | -2 | 2.36  | 0.95 |
| -5 | 9  | 2  | 1.60  | 0.71 |
| -5 | -9 | -2 | 2.27  | 0.66 |
| -5 | 9  | -2 | 2.36  | 0.78 |
| -5 | -9 | 2  | 1.89  | 0.63 |
| -5 | 9  | -2 | 2.22  | 0.71 |
| -5 | 9  | -2 | 3.31  | 1.05 |
| -5 | -9 | 2  | 0.98  | 0.88 |
| -5 | -9 | 2  | 1.82  | 0.41 |
| -5 | -9 | 2  | 3.32  | 0.93 |
| -5 | -9 | 2  | 2.20  | 0.39 |
| -5 | 9  | -2 | 3.62  | 1.30 |
| -5 | -9 | 2  | 2.21  | 0.86 |
| -6 | -9 | -2 | 12.86 | 1.40 |
| -6 | -9 | -2 | 11.38 | 1.00 |



## CIF S3

|    |    |    |       |      |
|----|----|----|-------|------|
| -6 | -9 | -2 | 12.10 | 1.06 |
| -6 | 9  | 2  | 12.57 | 1.11 |
| -6 | 9  | 2  | 11.79 | 1.03 |
| -6 | -9 | -2 | 11.33 | 1.02 |
| -6 | -9 | -2 | 11.74 | 1.21 |
| -6 | 9  | 2  | 10.34 | 1.02 |
| -6 | 9  | 2  | 9.80  | 1.09 |
| -6 | -9 | -2 | 12.03 | 1.38 |
| -6 | 9  | 2  | 12.04 | 1.35 |
| -6 | 9  | 2  | 10.89 | 1.19 |
| 6  | -9 | 2  | 12.44 | 1.23 |
| -6 | -9 | -2 | 11.25 | 1.06 |
| -6 | -9 | 2  | 11.72 | 0.84 |
| -6 | -9 | 2  | 10.79 | 0.83 |
| -6 | 9  | -2 | 11.21 | 1.15 |
| -6 | 9  | -2 | 12.05 | 1.15 |
| -6 | -9 | 2  | 11.69 | 1.23 |
| -6 | 9  | -2 | 10.66 | 1.08 |
| -6 | -9 | 2  | 10.68 | 0.95 |
| -6 | 9  | -2 | 11.61 | 0.85 |
| -6 | -9 | 2  | 10.08 | 1.23 |
| -6 | -9 | 2  | 12.25 | 0.90 |
| -6 | -9 | 2  | 11.96 | 1.33 |
| -6 | 9  | -2 | 11.25 | 1.35 |
| -6 | -9 | 2  | 11.12 | 0.93 |
| -7 | -9 | -2 | 18.20 | 1.11 |
| -7 | 9  | 2  | 17.81 | 1.18 |
| -7 | -9 | -2 | 16.35 | 1.11 |
| -7 | 9  | 2  | 16.28 | 1.26 |
| -7 | 9  | 2  | 17.06 | 1.17 |
| -7 | 9  | 2  | 16.82 | 1.20 |
| -7 | -9 | -2 | 18.24 | 1.18 |
| 7  | -9 | 2  | 17.25 | 1.40 |
| -7 | -9 | -2 | 17.32 | 1.46 |
| -7 | 9  | 2  | 17.19 | 1.24 |
| -7 | 9  | 2  | 16.76 | 1.17 |
| -7 | -9 | -2 | 18.25 | 1.47 |
| -7 | 9  | 2  | 13.30 | 1.34 |
| -7 | 9  | -2 | 17.10 | 1.50 |
| -7 | 9  | -2 | 17.59 | 1.21 |
| -7 | 9  | -2 | 17.76 | 1.26 |

## CIF S3

|    |     |    |       |      |
|----|-----|----|-------|------|
| -7 | -9  | 2  | 16.95 | 1.00 |
| -7 | -9  | 2  | 16.05 | 1.30 |
| -7 | -9  | 2  | 17.05 | 1.42 |
| -8 | 9   | 2  | 3.97  | 0.75 |
| -8 | 9   | 2  | 5.92  | 0.60 |
| 8  | -9  | 2  | 5.16  | 0.88 |
| -8 | 9   | 2  | 5.20  | 0.66 |
| -8 | -9  | -2 | 4.88  | 0.60 |
| -8 | -9  | -2 | 5.37  | 0.54 |
| -8 | 9   | 2  | 5.15  | 0.66 |
| -8 | 9   | -2 | 5.58  | 0.81 |
| -8 | 9   | -2 | 5.47  | 0.73 |
| -8 | 9   | -2 | 2.55  | 0.72 |
| -8 | 9   | -2 | 4.72  | 0.66 |
| -8 | -9  | 2  | 5.06  | 0.33 |
| -8 | 9   | -2 | 5.84  | 0.68 |
| -8 | -9  | 2  | 4.45  | 0.40 |
| -8 | 9   | -2 | 5.04  | 0.76 |
| -8 | -9  | 2  | 4.95  | 0.39 |
| 9  | -9  | 2  | 3.80  | 0.55 |
| -9 | 9   | 2  | 3.80  | 0.36 |
| -9 | 9   | 2  | 3.32  | 0.47 |
| -9 | -9  | -2 | 3.26  | 0.24 |
| -9 | -9  | -2 | 3.08  | 0.25 |
| -9 | 9   | 2  | 4.26  | 0.53 |
| -9 | 9   | -2 | 3.77  | 0.44 |
| -9 | 9   | -2 | 2.52  | 0.44 |
| -9 | 9   | -2 | 2.88  | 0.48 |
| 0  | -10 | -2 | -0.46 | 0.86 |
| 0  | 10  | -2 | 1.12  | 0.94 |
| 0  | -10 | 2  | 0.28  | 0.78 |
| 0  | -10 | -2 | 0.40  | 0.84 |
| 0  | 10  | 2  | 1.30  | 0.78 |
| 0  | -10 | 2  | 0.61  | 0.73 |
| 0  | -10 | 2  | 0.84  | 0.77 |
| 1  | -10 | 2  | 9.36  | 1.26 |
| -1 | -10 | -2 | 8.14  | 1.04 |
| 1  | -10 | 2  | 9.90  | 1.23 |
| 1  | 10  | -2 | 7.82  | 1.27 |
| -1 | 10  | 2  | 7.43  | 1.03 |
| -1 | -10 | -2 | 7.58  | 1.10 |

## CIF S3

|    |     |    |       |      |
|----|-----|----|-------|------|
| 1  | 10  | -2 | 7.19  | 1.17 |
| -1 | -10 | -2 | 8.49  | 1.15 |
| -1 | -10 | 2  | 8.22  | 1.03 |
| -1 | -10 | 2  | 9.69  | 1.09 |
| -1 | -10 | 2  | 8.79  | 1.08 |
| 1  | -10 | -2 | 8.13  | 1.16 |
| -2 | -10 | -2 | 50.02 | 2.58 |
| 2  | -10 | 2  | 50.34 | 2.69 |
| -2 | -10 | -2 | 48.17 | 2.55 |
| -2 | 10  | 2  | 46.84 | 2.72 |
| -2 | -10 | -2 | 45.99 | 2.63 |
| -2 | -10 | -2 | 48.14 | 2.61 |
| 2  | 10  | -2 | 45.75 | 2.82 |
| -2 | -10 | -2 | 51.05 | 2.67 |
| -2 | -10 | 2  | 45.18 | 2.57 |
| -2 | -10 | 2  | 46.00 | 2.59 |
| -2 | 10  | -2 | 48.84 | 2.68 |
| -2 | -10 | 2  | 45.20 | 2.64 |
| -2 | -10 | 2  | 46.59 | 2.59 |
| -2 | -10 | 2  | 47.31 | 2.56 |
| 2  | -10 | -2 | 47.61 | 2.74 |
| 2  | 10  | 2  | 41.14 | 2.78 |
| -2 | 10  | -2 | 47.85 | 2.85 |
| 3  | -10 | 2  | 5.08  | 1.27 |
| -3 | -10 | -2 | 2.47  | 0.68 |
| 3  | 10  | -2 | 1.55  | 0.88 |
| -3 | 10  | 2  | 4.67  | 1.05 |
| -3 | -10 | -2 | 4.38  | 0.90 |
| -3 | -10 | -2 | 4.03  | 0.93 |
| -3 | -10 | -2 | 2.55  | 0.81 |
| -3 | -10 | -2 | 3.77  | 0.90 |
| -3 | -10 | -2 | 3.40  | 0.92 |
| -3 | -10 | -2 | 3.49  | 0.82 |
| -3 | -10 | 2  | 3.76  | 0.71 |
| -3 | 10  | -2 | 4.08  | 1.03 |
| 3  | 10  | 2  | 3.94  | 0.95 |
| -3 | -10 | 2  | 4.32  | 0.90 |
| -3 | 10  | -2 | 2.37  | 0.91 |
| 3  | -10 | -2 | 2.85  | 1.01 |
| -3 | -10 | 2  | 4.19  | 0.86 |
| -3 | -10 | 2  | 2.77  | 0.77 |

## CIF S3

|    |     |    |      |      |
|----|-----|----|------|------|
| -3 | -10 | 2  | 6.31 | 1.19 |
| -3 | -10 | 2  | 4.77 | 0.97 |
| -4 | -10 | -2 | 5.70 | 1.46 |
| -4 | -10 | -2 | 7.66 | 2.03 |
| -4 | -10 | -2 | 7.28 | 1.27 |
| -4 | -10 | -2 | 7.14 | 0.82 |
| 4  | -10 | 2  | 4.18 | 1.16 |
| -4 | -10 | -2 | 7.03 | 1.04 |
| -4 | -10 | -2 | 5.93 | 0.96 |
| -4 | -10 | -2 | 5.80 | 1.34 |
| 4  | -10 | 2  | 5.34 | 1.13 |
| -4 | 10  | 2  | 6.42 | 1.27 |
| -4 | -10 | -2 | 7.54 | 1.21 |
| -4 | 10  | 2  | 6.43 | 1.41 |
| -4 | 10  | 2  | 6.72 | 1.07 |
| -4 | -10 | -2 | 6.36 | 1.09 |
| -4 | 10  | 2  | 6.70 | 1.07 |
| -4 | 10  | 2  | 7.36 | 1.07 |
| -4 | -10 | -2 | 5.87 | 0.85 |
| -4 | -10 | 2  | 5.17 | 0.66 |
| -4 | -10 | 2  | 5.21 | 1.18 |
| 4  | -10 | -2 | 4.15 | 1.15 |
| -4 | -10 | 2  | 6.94 | 1.18 |
| -4 | -10 | 2  | 8.14 | 1.60 |
| -4 | -10 | 2  | 7.09 | 1.08 |
| -4 | -10 | 2  | 6.17 | 0.88 |
| -4 | 10  | -2 | 7.49 | 1.18 |
| -4 | -10 | 2  | 6.88 | 0.93 |
| -4 | 10  | -2 | 5.45 | 0.99 |
| -4 | -10 | 2  | 6.46 | 1.14 |
| -5 | -10 | -2 | 0.40 | 0.71 |
| -5 | -10 | -2 | 0.28 | 0.88 |
| -5 | 10  | 2  | 0.73 | 0.37 |
| -5 | 10  | 2  | 0.87 | 0.59 |
| -5 | 10  | 2  | 0.61 | 0.66 |
| -5 | -10 | -2 | 2.75 | 0.89 |
| -5 | -10 | -2 | 1.31 | 0.85 |
| -5 | -10 | -2 | 0.98 | 0.63 |
| -5 | -10 | -2 | 2.09 | 0.72 |
| 5  | -10 | 2  | 1.09 | 0.61 |
| -5 | 10  | 2  | 1.20 | 0.77 |

## CIF S3

|    |     |    |       |      |
|----|-----|----|-------|------|
| -5 | -10 | -2 | 0.83  | 0.68 |
| -5 | -10 | -2 | 0.63  | 0.66 |
| -5 | 10  | 2  | 2.90  | 1.04 |
| -5 | 10  | 2  | 0.56  | 0.71 |
| -5 | -10 | 2  | 1.65  | 0.80 |
| -5 | -10 | 2  | 0.57  | 0.54 |
| -5 | 10  | -2 | 1.41  | 0.71 |
| -5 | -10 | 2  | 0.59  | 0.56 |
| -5 | 10  | -2 | 1.45  | 0.97 |
| 5  | -10 | -2 | 0.76  | 0.78 |
| -5 | -10 | 2  | 1.03  | 0.54 |
| -5 | -10 | 2  | 0.14  | 0.87 |
| -5 | 10  | -2 | 0.18  | 1.01 |
| -5 | -10 | 2  | 1.53  | 0.66 |
| -5 | -10 | 2  | 1.38  | 0.92 |
| -6 | -10 | -2 | 0.76  | 0.81 |
| -6 | -10 | -2 | 0.97  | 0.88 |
| -6 | -10 | -2 | 0.58  | 0.71 |
| -6 | 10  | 2  | 2.01  | 0.60 |
| -6 | -10 | -2 | 0.50  | 0.89 |
| -6 | -10 | -2 | 1.27  | 0.59 |
| -6 | 10  | 2  | 1.75  | 0.81 |
| -6 | -10 | -2 | 1.54  | 0.73 |
| -6 | -10 | -2 | 0.90  | 0.59 |
| -6 | 10  | 2  | 1.75  | 0.64 |
| -6 | 10  | 2  | 2.12  | 0.54 |
| -6 | 10  | 2  | 2.01  | 0.77 |
| 6  | -10 | 2  | 0.75  | 0.61 |
| -6 | 10  | 2  | 1.91  | 0.62 |
| -6 | 10  | -2 | 0.35  | 0.71 |
| -6 | -10 | 2  | 2.05  | 0.62 |
| -6 | -10 | 2  | 0.47  | 0.82 |
| -6 | -10 | 2  | 1.65  | 0.47 |
| -6 | 10  | -2 | 1.80  | 0.36 |
| -6 | 10  | -2 | 0.84  | 0.64 |
| -6 | -10 | 2  | 1.47  | 0.37 |
| 6  | -10 | -2 | 0.94  | 0.74 |
| -6 | -10 | 2  | -0.07 | 0.69 |
| -6 | 10  | -2 | 0.56  | 0.91 |
| -6 | -10 | 2  | 1.48  | 0.43 |
| -6 | -10 | 2  | 0.78  | 0.76 |

## CIF S3

|    |     |    |       |      |
|----|-----|----|-------|------|
| -6 | -10 | 2  | 1.96  | 0.87 |
| 7  | -10 | 2  | 4.26  | 0.86 |
| -7 | 10  | 2  | 2.97  | 0.70 |
| -7 | -10 | -2 | 3.55  | 0.50 |
| -7 | 10  | 2  | 4.59  | 0.72 |
| -7 | -10 | -2 | 2.88  | 0.60 |
| -7 | 10  | 2  | 3.13  | 0.70 |
| -7 | 10  | 2  | 2.63  | 0.71 |
| -7 | 10  | 2  | 4.64  | 0.84 |
| -7 | 10  | 2  | 3.73  | 0.80 |
| -7 | -10 | -2 | 3.40  | 0.72 |
| -7 | 10  | 2  | 3.75  | 0.69 |
| 7  | -10 | -2 | 4.61  | 1.05 |
| -7 | -10 | 2  | 2.75  | 0.65 |
| -7 | 10  | -2 | 3.58  | 0.83 |
| -7 | -10 | 2  | 3.26  | 0.49 |
| -7 | 10  | -2 | 4.04  | 0.75 |
| -7 | 10  | -2 | 3.12  | 0.74 |
| -8 | 10  | 2  | -0.21 | 0.38 |
| -8 | 10  | 2  | 0.39  | 0.33 |
| -8 | 10  | 2  | 0.73  | 0.38 |
| -8 | -10 | -2 | 0.43  | 0.27 |
| 8  | -10 | 2  | 0.30  | 0.39 |
| -8 | 10  | 2  | 0.44  | 0.31 |
| -8 | 10  | -2 | 0.12  | 0.32 |
| -8 | 10  | -2 | 0.26  | 0.35 |
| -8 | 10  | -2 | 0.37  | 0.50 |
| -8 | 10  | -2 | 0.06  | 0.33 |
| -8 | 10  | -2 | 1.12  | 0.40 |
| 8  | -10 | -2 | -0.19 | 0.47 |
| 0  | -11 | 2  | 58.81 | 3.24 |
| 0  | -11 | -2 | 57.80 | 3.22 |
| 0  | -11 | -2 | 62.33 | 3.36 |
| 0  | -11 | 2  | 62.19 | 3.21 |
| 1  | -11 | 2  | 13.74 | 1.37 |
| -1 | -11 | -2 | 14.16 | 1.18 |
| 1  | -11 | 2  | 11.41 | 1.39 |
| -1 | -11 | -2 | 13.64 | 1.37 |
| -1 | -11 | -2 | 11.33 | 1.32 |
| -1 | 11  | 2  | 13.71 | 1.35 |
| 1  | 11  | -2 | 10.68 | 1.44 |

## CIF S3

|    |     |    |       |      |
|----|-----|----|-------|------|
| -1 | -11 | 2  | 13.18 | 1.26 |
| -1 | -11 | 2  | 10.87 | 1.80 |
| -1 | -11 | 2  | 13.75 | 1.42 |
| 1  | -11 | -2 | 15.74 | 1.49 |
| -1 | -11 | 2  | 11.09 | 1.29 |
| -1 | 11  | -2 | 11.00 | 1.32 |
| -2 | -11 | -2 | 0.13  | 0.82 |
| -2 | 11  | 2  | -0.14 | 0.87 |
| -2 | -11 | -2 | 0.95  | 0.70 |
| -2 | -11 | -2 | 0.05  | 0.78 |
| -2 | -11 | -2 | 0.59  | 0.91 |
| 2  | -11 | 2  | -0.44 | 1.00 |
| -2 | -11 | -2 | 0.82  | 0.82 |
| -2 | -11 | 2  | 1.23  | 0.84 |
| -2 | -11 | 2  | -0.01 | 0.86 |
| -2 | 11  | -2 | 0.38  | 0.79 |
| -2 | -11 | 2  | 0.60  | 0.78 |
| -2 | -11 | 2  | 0.12  | 0.66 |
| 2  | -11 | -2 | 0.29  | 0.92 |
| -2 | -11 | 2  | -0.40 | 0.82 |
| -3 | -11 | -2 | -0.25 | 0.87 |
| -3 | -11 | -2 | 0.91  | 0.82 |
| -3 | -11 | -2 | -0.20 | 0.72 |
| -3 | -11 | -2 | -0.59 | 0.84 |
| 3  | -11 | 2  | -0.14 | 0.88 |
| -3 | -11 | -2 | -0.22 | 0.73 |
| -3 | 11  | 2  | 0.49  | 0.75 |
| -3 | -11 | -2 | 0.57  | 0.75 |
| -3 | 11  | -2 | -0.87 | 0.81 |
| 3  | -11 | -2 | -0.02 | 1.00 |
| -3 | -11 | 2  | -0.77 | 0.45 |
| -3 | -11 | 2  | -0.68 | 0.76 |
| 3  | -11 | -2 | -0.27 | 0.63 |
| -3 | -11 | 2  | -0.22 | 0.77 |
| -3 | -11 | 2  | -0.06 | 0.83 |
| -3 | -11 | 2  | 0.79  | 0.85 |
| -3 | -11 | 2  | -0.05 | 0.71 |
| -3 | -11 | 2  | -0.15 | 0.73 |
| -3 | 11  | -2 | 0.32  | 0.79 |
| -3 | -11 | 2  | 0.43  | 0.64 |
| -3 | -11 | 2  | 0.31  | 0.75 |

## CIF S3

|    |     |    |       |      |
|----|-----|----|-------|------|
| -4 | -11 | -2 | 3.53  | 0.91 |
| 4  | -11 | 2  | 3.02  | 0.83 |
| -4 | 11  | 2  | 3.14  | 1.09 |
| -4 | -11 | -2 | 3.19  | 0.69 |
| -4 | -11 | -2 | 2.21  | 0.83 |
| -4 | 11  | 2  | 2.35  | 0.75 |
| -4 | 11  | 2  | 2.58  | 0.67 |
| -4 | -11 | -2 | 1.74  | 0.78 |
| -4 | -11 | -2 | 2.33  | 0.76 |
| -4 | -11 | -2 | 2.55  | 0.80 |
| -4 | -11 | -2 | 0.15  | 0.87 |
| -4 | -11 | -2 | 2.07  | 0.72 |
| -4 | -11 | -2 | 3.01  | 0.69 |
| -4 | -11 | 2  | 2.89  | 0.81 |
| 4  | -11 | -2 | 1.86  | 0.72 |
| -4 | -11 | 2  | 2.44  | 0.92 |
| -4 | -11 | 2  | 1.76  | 0.65 |
| -4 | -11 | 2  | 2.23  | 0.78 |
| -4 | -11 | 2  | 1.78  | 0.60 |
| -4 | -11 | 2  | 4.12  | 0.92 |
| -4 | -11 | 2  | 3.72  | 0.73 |
| -4 | -11 | 2  | 3.65  | 1.01 |
| -5 | 11  | 2  | 2.16  | 0.60 |
| -5 | -11 | -2 | 1.44  | 0.79 |
| -5 | 11  | 2  | 2.30  | 0.55 |
| -5 | 11  | 2  | 0.96  | 0.66 |
| -5 | 11  | 2  | 1.08  | 0.76 |
| 5  | -11 | 2  | 1.43  | 0.53 |
| -5 | -11 | -2 | 0.98  | 0.62 |
| -5 | -11 | -2 | 0.88  | 0.61 |
| -5 | -11 | -2 | 0.73  | 0.98 |
| -5 | -11 | -2 | 0.74  | 0.58 |
| -5 | -11 | -2 | -0.27 | 0.83 |
| -5 | -11 | -2 | 0.53  | 0.66 |
| -5 | 11  | 2  | 0.44  | 1.04 |
| -5 | 11  | 2  | 1.08  | 0.32 |
| -5 | -11 | -2 | 0.48  | 0.90 |
| -5 | 11  | -2 | 1.22  | 0.73 |
| -5 | 11  | -2 | 2.80  | 0.87 |
| -5 | -11 | 2  | 1.42  | 0.66 |
| -5 | 11  | -2 | 0.75  | 0.47 |



## CIF S3

|    |     |    |       |      |
|----|-----|----|-------|------|
| -5 | -11 | 2  | 0.59  | 0.91 |
| -5 | -11 | 2  | 0.46  | 0.47 |
| -5 | -11 | 2  | 1.24  | 0.84 |
| -5 | -11 | 2  | 0.69  | 0.52 |
| 5  | -11 | -2 | 0.94  | 0.70 |
| -5 | -11 | 2  | 0.27  | 0.50 |
| -5 | -11 | 2  | 0.80  | 0.80 |
| -6 | 11  | 2  | -0.16 | 0.61 |
| 6  | -11 | 2  | 0.42  | 0.47 |
| -6 | -11 | -2 | -0.77 | 0.51 |
| -6 | -11 | -2 | 0.36  | 0.46 |
| -6 | -11 | -2 | 0.48  | 0.53 |
| -6 | -11 | -2 | 0.12  | 0.78 |
| -6 | 11  | 2  | 0.32  | 0.45 |
| -6 | 11  | 2  | 1.24  | 0.72 |
| -6 | 11  | 2  | -0.20 | 0.57 |
| -6 | 11  | 2  | 0.20  | 0.54 |
| -6 | -11 | -2 | -0.51 | 0.66 |
| -6 | -11 | 2  | -0.12 | 0.78 |
| 6  | -11 | -2 | 0.74  | 0.63 |
| -6 | -11 | 2  | 0.36  | 0.33 |
| -6 | 11  | -2 | -0.09 | 0.60 |
| -6 | 11  | -2 | 0.02  | 0.79 |
| -6 | -11 | 2  | 0.13  | 0.65 |
| -6 | 11  | -2 | 0.10  | 0.59 |
| -6 | -11 | 2  | -0.04 | 0.42 |
| -6 | -11 | 2  | 0.39  | 0.36 |
| -7 | -11 | -2 | 0.09  | 0.36 |
| -7 | 11  | 2  | -0.08 | 0.48 |
| -7 | 11  | 2  | 0.20  | 0.53 |
| -7 | 11  | 2  | 0.35  | 0.43 |
| -7 | 11  | 2  | 0.54  | 0.37 |
| -7 | -11 | -2 | 0.67  | 0.28 |
| -7 | -11 | -2 | 0.30  | 0.38 |
| 7  | -11 | 2  | -0.14 | 0.38 |
| -7 | 11  | 2  | 0.33  | 0.42 |
| -7 | 11  | -2 | -0.68 | 0.63 |
| 7  | -11 | -2 | -0.41 | 0.46 |
| -7 | -11 | 2  | 0.12  | 0.30 |
| -7 | -11 | 2  | 0.31  | 0.25 |
| -7 | 11  | -2 | 0.25  | 0.42 |

## CIF S3

|    |     |    |       |      |
|----|-----|----|-------|------|
| 0  | -12 | 2  | 9.58  | 1.47 |
| 0  | -12 | 2  | 6.59  | 1.28 |
| 0  | -12 | -2 | 8.88  | 1.23 |
| 0  | -12 | 2  | 7.49  | 1.08 |
| 0  | -12 | -2 | 8.87  | 1.60 |
| 0  | -12 | -2 | 10.19 | 1.28 |
| 0  | -12 | 2  | 7.69  | 1.19 |
| 0  | -12 | 2  | 7.04  | 1.23 |
| 0  | -12 | 2  | 7.49  | 1.76 |
| 0  | -12 | -2 | 7.55  | 1.69 |
| 0  | -12 | 2  | 5.70  | 1.16 |
| 1  | -12 | 2  | 13.22 | 1.60 |
| 1  | -12 | 2  | 16.37 | 1.39 |
| 1  | -12 | 2  | 12.82 | 1.64 |
| -1 | -12 | -2 | 13.68 | 1.20 |
| 1  | -12 | 2  | 12.93 | 1.46 |
| -1 | -12 | -2 | 13.80 | 1.39 |
| 1  | -12 | 2  | 15.81 | 1.43 |
| -1 | -12 | -2 | 13.17 | 1.88 |
| -1 | -12 | -2 | 15.48 | 1.35 |
| -1 | -12 | -2 | 13.13 | 1.38 |
| -1 | 12  | 2  | 11.75 | 1.27 |
| -1 | -12 | 2  | 14.77 | 1.36 |
| -1 | -12 | 2  | 12.08 | 1.25 |
| -1 | -12 | 2  | 13.02 | 1.51 |
| 1  | -12 | -2 | 12.53 | 1.32 |
| 1  | -12 | -2 | 12.62 | 1.68 |
| -1 | -12 | 2  | 14.26 | 1.28 |
| -1 | -12 | 2  | 12.66 | 1.26 |
| -1 | -12 | 2  | 14.43 | 1.43 |
| -2 | -12 | -2 | 5.15  | 1.13 |
| -2 | -12 | -2 | 4.59  | 1.72 |
| 2  | -12 | 2  | 5.88  | 1.25 |
| 2  | -12 | 2  | 5.69  | 1.42 |
| -2 | -12 | -2 | 6.02  | 1.16 |
| -2 | -12 | -2 | 5.45  | 1.04 |
| -2 | -12 | -2 | 6.43  | 1.17 |
| -2 | -12 | -2 | 5.20  | 1.26 |
| -2 | -12 | -2 | 3.98  | 1.08 |
| -2 | -12 | 2  | 5.26  | 1.23 |
| -2 | -12 | 2  | 4.70  | 0.90 |

## CIF S3

|    |     |    |       |      |
|----|-----|----|-------|------|
| -2 | -12 | 2  | 4.55  | 1.33 |
| -2 | -12 | 2  | 5.87  | 1.21 |
| -2 | -12 | 2  | 3.18  | 0.85 |
| -2 | -12 | 2  | 4.41  | 1.05 |
| 2  | -12 | -2 | 8.02  | 1.32 |
| -2 | -12 | 2  | 5.25  | 1.22 |
| 2  | -12 | -2 | 4.20  | 1.12 |
| -2 | -12 | 2  | 4.51  | 1.00 |
| -2 | -12 | 2  | 5.02  | 1.14 |
| 3  | -12 | 2  | 9.79  | 1.40 |
| -3 | -12 | -2 | 8.11  | 1.18 |
| -3 | -12 | -2 | 5.09  | 1.10 |
| -3 | -12 | -2 | 7.68  | 0.96 |
| -3 | -12 | -2 | 6.73  | 1.16 |
| -3 | -12 | -2 | 8.13  | 1.01 |
| -3 | -12 | -2 | 8.62  | 1.09 |
| -3 | -12 | -2 | 7.55  | 1.74 |
| 3  | -12 | -2 | 6.27  | 1.15 |
| -3 | -12 | 2  | 7.44  | 0.99 |
| -3 | -12 | 2  | 5.30  | 1.16 |
| -3 | -12 | 2  | 6.69  | 1.14 |
| -3 | -12 | 2  | 8.58  | 1.15 |
| -3 | -12 | 2  | 6.86  | 1.25 |
| 3  | -12 | -2 | 5.01  | 1.05 |
| -3 | -12 | 2  | 7.24  | 1.01 |
| -3 | -12 | 2  | 6.87  | 1.03 |
| -3 | -12 | 2  | 6.45  | 1.01 |
| -4 | -12 | -2 | 25.52 | 1.58 |
| -4 | -12 | -2 | 24.88 | 1.60 |
| -4 | -12 | -2 | 26.33 | 1.70 |
| -4 | 12  | 2  | 24.79 | 1.58 |
| -4 | 12  | 2  | 22.92 | 2.02 |
| -4 | -12 | -2 | 23.58 | 1.52 |
| -4 | -12 | -2 | 25.55 | 1.75 |
| -4 | 12  | 2  | 29.27 | 1.95 |
| -4 | -12 | -2 | 22.29 | 1.65 |
| -4 | -12 | -2 | 23.42 | 1.59 |
| -4 | 12  | 2  | 24.35 | 1.41 |
| -4 | -12 | 2  | 26.79 | 1.69 |
| -4 | -12 | 2  | 24.73 | 1.58 |
| -4 | -12 | 2  | 23.74 | 1.69 |

## CIF S3

|    |     |    |       |      |
|----|-----|----|-------|------|
| -4 | -12 | 2  | 27.66 | 1.76 |
| -4 | -12 | 2  | 21.68 | 1.68 |
| -4 | -12 | 2  | 24.92 | 1.50 |
| 4  | -12 | -2 | 23.38 | 1.43 |
| -4 | -12 | 2  | 21.47 | 1.49 |
| 4  | -12 | -2 | 27.10 | 1.69 |
| -5 | 12  | 2  | 3.60  | 0.87 |
| -5 | -12 | -2 | 2.09  | 0.56 |
| -5 | -12 | -2 | 2.87  | 0.77 |
| -5 | 12  | 2  | 2.97  | 0.78 |
| -5 | -12 | -2 | 3.00  | 0.74 |
| -5 | 12  | 2  | 3.52  | 0.94 |
| -5 | -12 | -2 | 1.60  | 0.86 |
| -5 | 12  | 2  | 3.11  | 0.63 |
| -5 | -12 | -2 | 2.31  | 0.62 |
| -5 | -12 | -2 | 3.27  | 0.79 |
| -5 | 12  | 2  | 3.04  | 0.74 |
| -5 | -12 | 2  | 2.35  | 0.50 |
| -5 | 12  | -2 | 3.55  | 0.87 |
| 5  | -12 | -2 | 2.16  | 0.71 |
| -5 | 12  | -2 | 2.85  | 0.52 |
| -5 | -12 | 2  | 1.88  | 0.67 |
| -5 | -12 | 2  | 1.90  | 0.88 |
| -5 | -12 | 2  | 2.28  | 0.45 |
| -5 | -12 | 2  | 2.92  | 0.69 |
| 5  | -12 | -2 | 2.51  | 1.05 |
| -6 | -12 | -2 | 5.40  | 0.70 |
| -6 | -12 | -2 | 5.31  | 0.72 |
| -6 | -12 | -2 | 3.63  | 0.60 |
| -6 | 12  | 2  | 5.08  | 0.61 |
| -6 | 12  | 2  | 4.30  | 0.73 |
| -6 | 12  | 2  | 5.34  | 0.75 |
| -6 | 12  | 2  | 4.19  | 0.85 |
| -6 | -12 | 2  | 4.43  | 0.56 |
| -6 | -12 | 2  | 4.58  | 0.51 |
| -6 | -12 | 2  | 3.97  | 0.81 |
| 6  | -12 | -2 | 3.77  | 0.67 |
| -6 | 12  | -2 | 3.82  | 1.04 |
| -6 | 12  | -2 | 4.91  | 0.76 |
| -7 | -12 | -2 | 0.65  | 0.32 |
| -7 | 12  | 2  | 2.80  | 0.72 |

## CIF S3

|    |     |    |       |      |
|----|-----|----|-------|------|
| -7 | -12 | -2 | 1.69  | 0.45 |
| -7 | 12  | 2  | 1.23  | 0.32 |
| -7 | 12  | 2  | 0.52  | 0.59 |
| -7 | -12 | 2  | 2.03  | 0.22 |
| -7 | -12 | 2  | 1.43  | 0.26 |
| -7 | 12  | -2 | 0.96  | 0.46 |
| -7 | 12  | -2 | 2.32  | 0.39 |
| -7 | 12  | -2 | 0.66  | 0.33 |
| 0  | -13 | 2  | 0.53  | 0.77 |
| 0  | -13 | -2 | 0.38  | 0.37 |
| 0  | -13 | 2  | 0.66  | 1.00 |
| 0  | -13 | 2  | -0.30 | 0.92 |
| 0  | -13 | -2 | 0.16  | 1.00 |
| 0  | -13 | 2  | -0.68 | 0.80 |
| 0  | -13 | -2 | 0.01  | 1.00 |
| 0  | -13 | 2  | -0.07 | 0.48 |
| 0  | -13 | -2 | 0.44  | 0.90 |
| 1  | -13 | 2  | 0.94  | 0.44 |
| -1 | -13 | -2 | 1.53  | 0.86 |
| 1  | -13 | 2  | 1.01  | 0.97 |
| -1 | -13 | -2 | 0.74  | 0.53 |
| -1 | -13 | -2 | 0.86  | 0.75 |
| -1 | -13 | -2 | 0.95  | 0.81 |
| 1  | -13 | 2  | 2.26  | 0.82 |
| 1  | -13 | 2  | 1.68  | 0.96 |
| -1 | -13 | -2 | 2.13  | 0.98 |
| -1 | -13 | 2  | 0.45  | 0.56 |
| 1  | -13 | -2 | 1.60  | 1.09 |
| -1 | -13 | 2  | 0.87  | 0.68 |
| -1 | -13 | 2  | 0.31  | 0.82 |
| -1 | -13 | 2  | 1.76  | 0.79 |
| -1 | -13 | 2  | 1.37  | 0.97 |
| -1 | -13 | 2  | 1.67  | 0.79 |
| -1 | -13 | 2  | 1.83  | 0.76 |
| -2 | -13 | -2 | 0.51  | 0.98 |
| 2  | -13 | 2  | -0.51 | 0.92 |
| -2 | -13 | -2 | 0.22  | 0.51 |
| -2 | -13 | -2 | 0.48  | 0.76 |
| -2 | -13 | -2 | 0.88  | 0.80 |
| -2 | -13 | -2 | 1.23  | 0.70 |
| -2 | -13 | -2 | -0.35 | 0.75 |

## CIF S3

|    |     |    |       |      |
|----|-----|----|-------|------|
| 2  | -13 | 2  | -0.28 | 0.87 |
| -2 | -13 | 2  | 0.20  | 0.53 |
| -2 | -13 | 2  | 0.72  | 0.70 |
| -2 | -13 | 2  | 0.66  | 0.92 |
| -2 | -13 | 2  | 0.41  | 0.78 |
| 2  | -13 | -2 | 0.94  | 1.03 |
| -2 | -13 | 2  | 1.03  | 0.72 |
| -2 | -13 | 2  | 0.70  | 0.61 |
| -2 | -13 | 2  | -0.49 | 0.75 |
| -2 | -13 | 2  | 0.48  | 0.76 |
| -3 | -13 | -2 | 5.24  | 1.05 |
| -3 | -13 | -2 | 6.69  | 1.02 |
| -3 | -13 | -2 | 6.09  | 1.14 |
| 3  | -13 | 2  | 5.53  | 1.09 |
| -3 | -13 | -2 | 6.16  | 1.57 |
| -3 | -13 | -2 | 6.00  | 0.70 |
| -3 | -13 | -2 | 6.51  | 1.00 |
| -3 | -13 | 2  | 5.82  | 1.02 |
| -3 | -13 | 2  | 7.66  | 1.05 |
| -3 | -13 | 2  | 4.20  | 0.81 |
| -3 | -13 | 2  | 7.95  | 0.92 |
| -3 | -13 | 2  | 6.46  | 0.88 |
| -4 | -13 | -2 | 11.69 | 1.04 |
| -4 | 13  | 2  | 12.92 | 0.79 |
| -4 | -13 | -2 | 9.40  | 0.98 |
| -4 | -13 | -2 | 13.16 | 1.50 |
| -4 | -13 | -2 | 11.66 | 1.04 |
| -4 | -13 | -2 | 13.50 | 1.08 |
| -4 | 13  | 2  | 10.30 | 1.27 |
| -4 | -13 | 2  | 14.27 | 1.02 |
| -4 | -13 | 2  | 11.84 | 1.01 |
| -4 | -13 | 2  | 13.86 | 1.15 |
| -5 | 13  | 2  | 1.51  | 0.56 |
| -5 | -13 | -2 | 1.92  | 0.62 |
| -5 | -13 | -2 | 1.34  | 0.46 |
| -5 | 13  | 2  | 3.06  | 0.82 |
| -5 | -13 | -2 | 0.20  | 0.55 |
| -5 | -13 | -2 | 1.37  | 0.47 |
| -5 | -13 | -2 | 0.81  | 0.53 |
| -5 | -13 | 2  | 1.82  | 0.36 |
| -5 | 13  | -2 | 1.69  | 0.72 |

## CIF S3

|    |     |    |       |      |
|----|-----|----|-------|------|
| -5 | -13 | 2  | 2.47  | 0.59 |
| -6 | 13  | 2  | 0.04  | 0.32 |
| -6 | -13 | -2 | 0.25  | 0.24 |
| -6 | -13 | -2 | 0.46  | 0.31 |
| -6 | 13  | 2  | 0.59  | 0.43 |
| -6 | 13  | -2 | 0.29  | 0.45 |
| -6 | -13 | 2  | 0.54  | 0.22 |
| -6 | 13  | -2 | 0.48  | 0.51 |
| 0  | -14 | 2  | 3.68  | 1.06 |
| 0  | -14 | -2 | 4.51  | 1.21 |
| 0  | -14 | 2  | 4.00  | 0.85 |
| 0  | -14 | 2  | 6.34  | 1.15 |
| 0  | -14 | 2  | 3.04  | 0.82 |
| 0  | -14 | -2 | 2.35  | 0.89 |
| 0  | -14 | -2 | 4.89  | 0.99 |
| 0  | -14 | 2  | 3.78  | 0.94 |
| 0  | -14 | 2  | 3.81  | 0.85 |
| -1 | -14 | -2 | 0.54  | 0.66 |
| -1 | -14 | -2 | 0.35  | 0.32 |
| -1 | -14 | -2 | 0.68  | 0.62 |
| -1 | -14 | -2 | 0.29  | 0.87 |
| -1 | -14 | -2 | 1.16  | 0.82 |
| 1  | -14 | 2  | -0.09 | 0.78 |
| -1 | -14 | -2 | 0.13  | 0.70 |
| 1  | -14 | 2  | -0.53 | 0.66 |
| -1 | -14 | -2 | 1.50  | 0.69 |
| 1  | -14 | 2  | 1.48  | 0.90 |
| 1  | -14 | 2  | 1.15  | 0.86 |
| -1 | -14 | 2  | 0.66  | 0.57 |
| -1 | -14 | 2  | 0.18  | 0.74 |
| 1  | -14 | -2 | 0.18  | 0.85 |
| -1 | -14 | 2  | -0.42 | 0.61 |
| -1 | -14 | 2  | 0.91  | 0.60 |
| -1 | -14 | 2  | 0.16  | 0.82 |
| 1  | -14 | -2 | 0.35  | 0.91 |
| -1 | -14 | 2  | 0.21  | 0.39 |
| -2 | -14 | -2 | 0.30  | 0.66 |
| 2  | -14 | 2  | -0.59 | 0.79 |
| 2  | -14 | 2  | 0.26  | 0.73 |
| -2 | -14 | -2 | -0.48 | 0.67 |
| -2 | -14 | -2 | -0.33 | 0.40 |

## CIF S3

|    |     |    |       |      |
|----|-----|----|-------|------|
| -2 | -14 | -2 | -0.44 | 0.63 |
| -2 | -14 | -2 | 0.01  | 0.52 |
| -2 | -14 | -2 | 0.93  | 0.77 |
| -2 | -14 | -2 | 0.91  | 0.72 |
| -2 | -14 | 2  | -0.53 | 0.62 |
| -2 | -14 | 2  | -0.28 | 0.53 |
| -2 | -14 | 2  | 0.05  | 0.56 |
| -2 | -14 | 2  | -0.11 | 0.64 |
| -2 | -14 | 2  | -0.02 | 0.77 |
| -2 | -14 | 2  | -0.37 | 0.47 |
| -2 | -14 | 2  | -0.08 | 0.57 |
| 2  | -14 | -2 | -0.23 | 0.78 |
| -3 | -14 | -2 | 4.40  | 0.77 |
| -3 | -14 | -2 | 4.61  | 0.85 |
| -3 | 14  | 2  | 3.69  | 0.57 |
| -3 | -14 | -2 | 5.09  | 0.90 |
| -3 | -14 | -2 | 3.75  | 0.81 |
| 3  | -14 | 2  | 3.28  | 0.83 |
| -3 | -14 | -2 | 4.47  | 1.15 |
| -3 | -14 | -2 | 4.57  | 0.92 |
| -3 | -14 | 2  | 4.73  | 0.70 |
| -3 | -14 | 2  | 3.27  | 0.69 |
| -3 | -14 | 2  | 3.01  | 0.80 |
| -3 | -14 | 2  | 3.25  | 1.22 |
| -3 | -14 | 2  | 2.87  | 0.74 |
| -4 | -14 | -2 | 6.35  | 0.70 |
| -4 | -14 | -2 | 7.82  | 0.68 |
| -4 | -14 | -2 | 6.37  | 1.02 |
| -4 | 14  | 2  | 6.42  | 0.90 |
| -4 | -14 | 2  | 7.46  | 0.67 |
| -4 | -14 | 2  | 5.76  | 0.62 |
| -4 | -14 | 2  | 7.43  | 0.61 |
| -4 | 14  | -2 | 7.79  | 0.51 |
| -4 | -14 | 2  | 6.92  | 1.27 |
| 0  | -15 | -2 | -0.11 | 0.60 |
| 0  | -15 | 2  | 0.07  | 0.54 |
| 0  | -15 | 2  | 0.82  | 0.59 |
| 0  | -15 | -2 | 1.39  | 0.67 |
| 0  | -15 | 2  | 0.06  | 0.47 |
| 0  | -15 | -2 | 0.19  | 0.53 |
| 0  | -15 | 2  | 0.34  | 0.58 |



## CIF S3

|    |     |    |        |       |
|----|-----|----|--------|-------|
| -1 | -15 | -2 | 0.18   | 0.49  |
| -1 | -15 | -2 | 0.33   | 0.59  |
| 1  | -15 | 2  | 0.44   | 0.54  |
| 1  | -15 | 2  | 0.45   | 0.58  |
| -1 | -15 | -2 | 1.01   | 0.60  |
| 1  | -15 | 2  | 1.17   | 0.61  |
| -1 | -15 | 2  | 0.48   | 0.29  |
| -1 | -15 | 2  | 0.35   | 0.59  |
| -1 | -15 | 2  | 0.70   | 0.57  |
| -1 | -15 | 2  | 0.49   | 0.46  |
| -1 | -15 | 2  | 1.04   | 0.52  |
| 1  | -15 | -2 | 0.22   | 0.66  |
| 1  | -15 | -2 | 1.25   | 0.64  |
| 2  | -15 | 2  | 0.21   | 0.52  |
| -2 | -15 | -2 | 0.24   | 0.56  |
| 2  | -15 | 2  | 0.93   | 0.57  |
| -2 | -15 | -2 | -0.20  | 0.47  |
| -2 | -15 | -2 | 0.09   | 0.53  |
| -2 | -15 | -2 | 0.53   | 0.83  |
| -2 | 15  | 2  | 0.26   | 0.38  |
| -2 | -15 | 2  | 0.30   | 0.31  |
| -2 | -15 | 2  | 0.16   | 0.40  |
| 2  | -15 | -2 | 0.08   | 0.58  |
| -2 | -15 | 2  | 0.26   | 0.50  |
| -2 | -15 | 2  | 0.63   | 0.43  |
| -2 | -15 | 2  | 0.40   | 0.45  |
| -3 | -15 | -2 | 0.86   | 0.44  |
| -3 | -15 | -2 | -0.24  | 0.54  |
| -3 | -15 | 2  | 0.82   | 0.33  |
| 0  | 0   | 3  | 0.05   | 0.31  |
| 0  | 0   | 3  | 0.22   | 0.41  |
| 0  | 0   | -3 | 0.23   | 0.36  |
| 0  | 0   | 3  | 0.28   | 0.32  |
| 0  | 0   | -3 | -0.07  | 0.41  |
| 0  | 0   | 3  | 0.02   | 0.43  |
| 1  | 0   | -3 | 438.19 | 20.32 |
| -1 | 0   | 3  | 412.32 | 20.29 |
| 1  | 0   | 3  | 409.79 | 20.44 |
| 1  | 0   | 3  | 421.49 | 20.41 |
| -1 | 0   | -3 | 420.20 | 20.40 |
| 1  | 0   | -3 | 419.91 | 20.33 |

## CIF S3

|    |   |    |        |       |
|----|---|----|--------|-------|
| -1 | 0 | -3 | 403.68 | 20.39 |
| -1 | 0 | -3 | 398.53 | 20.37 |
| -1 | 0 | -3 | 401.17 | 20.42 |
| 1  | 0 | 3  | 437.32 | 20.48 |
| -1 | 0 | 3  | 420.58 | 20.30 |
| 1  | 0 | -3 | 421.02 | 20.32 |
| -2 | 0 | -3 | 475.53 | 23.11 |
| -2 | 0 | -3 | 494.19 | 23.17 |
| -2 | 0 | 3  | 476.84 | 22.89 |
| -2 | 0 | -3 | 460.91 | 23.05 |
| 2  | 0 | -3 | 441.94 | 22.89 |
| -2 | 0 | 3  | 499.85 | 22.89 |
| -2 | 0 | -3 | 453.04 | 23.05 |
| 2  | 0 | 3  | 469.28 | 23.16 |
| -2 | 0 | -3 | 477.98 | 23.10 |
| 2  | 0 | 3  | 460.90 | 23.12 |
| -3 | 0 | 3  | 7.71   | 0.49  |
| 3  | 0 | 3  | 8.95   | 1.23  |
| -3 | 0 | -3 | 9.44   | 0.97  |
| -3 | 0 | -3 | 8.52   | 1.16  |
| 3  | 0 | 3  | 8.37   | 0.69  |
| -3 | 0 | -3 | 8.94   | 1.01  |
| -3 | 0 | 3  | 7.65   | 0.60  |
| 3  | 0 | 3  | 8.70   | 1.10  |
| -3 | 0 | -3 | 8.47   | 0.95  |
| -3 | 0 | 3  | 8.10   | 0.58  |
| 4  | 0 | 3  | 18.02  | 1.66  |
| -4 | 0 | -3 | 15.06  | 1.12  |
| -4 | 0 | 3  | 15.91  | 0.97  |
| -4 | 0 | 3  | 15.93  | 0.81  |
| -4 | 0 | -3 | 16.40  | 1.32  |
| -4 | 0 | 3  | 15.87  | 0.83  |
| 4  | 0 | 3  | 17.11  | 1.02  |
| -4 | 0 | 3  | 14.81  | 0.84  |
| 4  | 0 | 3  | 16.54  | 1.47  |
| -4 | 0 | -3 | 15.60  | 1.20  |
| -4 | 0 | -3 | 16.60  | 1.41  |
| -4 | 0 | -3 | 16.39  | 1.37  |
| -4 | 0 | 3  | 15.14  | 0.98  |
| -5 | 0 | -3 | 0.95   | 0.58  |
| -5 | 0 | 3  | 0.67   | 0.29  |

## CIF S3

|     |    |    |       |      |
|-----|----|----|-------|------|
| -5  | 0  | -3 | 0.19  | 0.56 |
| -5  | 0  | 3  | 0.42  | 0.29 |
| -5  | 0  | -3 | 0.10  | 0.73 |
| 5   | 0  | -3 | 0.70  | 0.23 |
| 5   | 0  | -3 | 0.41  | 0.24 |
| -5  | 0  | 3  | 0.68  | 0.18 |
| -5  | 0  | -3 | 0.61  | 0.34 |
| 5   | 0  | 3  | 0.60  | 0.47 |
| -6  | 0  | 3  | 7.70  | 0.53 |
| -6  | 0  | -3 | 6.44  | 0.65 |
| -6  | 0  | 3  | 7.64  | 0.52 |
| -6  | 0  | -3 | 7.19  | 0.93 |
| 6   | 0  | 3  | 8.71  | 0.81 |
| 7   | 0  | 3  | 1.82  | 0.63 |
| -7  | 0  | 3  | 1.53  | 0.37 |
| -7  | 0  | -3 | 1.41  | 0.50 |
| -7  | 0  | -3 | 1.58  | 0.43 |
| -7  | 0  | -3 | 0.66  | 0.68 |
| -7  | 0  | 3  | 1.12  | 0.31 |
| -8  | 0  | 3  | 15.92 | 1.00 |
| -8  | 0  | -3 | 18.28 | 1.17 |
| -8  | 0  | -3 | 16.63 | 1.16 |
| -9  | 0  | -3 | 3.06  | 0.55 |
| -9  | 0  | -3 | 2.82  | 0.64 |
| -9  | 0  | 3  | 3.92  | 0.80 |
| -9  | 0  | 3  | 2.70  | 0.38 |
| -9  | 0  | -3 | 3.16  | 0.70 |
| -9  | 0  | 3  | 1.96  | 0.32 |
| -9  | 0  | -3 | 2.43  | 0.82 |
| -9  | 0  | -3 | 3.06  | 0.59 |
| -9  | 0  | -3 | 2.58  | 0.66 |
| -9  | 0  | -3 | 2.29  | 0.51 |
| -10 | 0  | -3 | 1.05  | 0.33 |
| -10 | 0  | 3  | 1.04  | 0.49 |
| -10 | 0  | -3 | 1.42  | 0.36 |
| -10 | 0  | -3 | 1.38  | 0.39 |
| 0   | 1  | 3  | 1.06  | 0.51 |
| 0   | 1  | -3 | 0.21  | 0.12 |
| 0   | -1 | 3  | 0.09  | 0.41 |
| 0   | -1 | -3 | 0.50  | 0.43 |
| 0   | 1  | 3  | 0.06  | 0.48 |

## CIF S3

|    |    |    |         |       |
|----|----|----|---------|-------|
| 0  | 1  | 3  | -0.03   | 0.39  |
| 0  | -1 | 3  | 0.01    | 0.40  |
| 0  | -1 | 3  | 0.85    | 0.36  |
| 0  | 1  | -3 | 0.23    | 0.38  |
| 0  | 1  | -3 | 0.00    | 0.39  |
| 0  | -1 | 3  | 0.30    | 0.33  |
| 0  | -1 | -3 | 0.06    | 0.45  |
| 0  | 1  | 3  | 0.35    | 0.52  |
| -1 | -1 | -3 | 915.30  | 44.44 |
| -1 | -1 | -3 | 832.83  | 44.49 |
| -1 | -1 | -3 | 921.72  | 44.44 |
| 1  | 1  | -3 | 965.54  | 44.40 |
| 1  | -1 | 3  | 931.04  | 44.46 |
| 1  | 1  | -3 | 906.92  | 44.32 |
| 1  | -1 | 3  | 888.57  | 44.45 |
| -1 | 1  | 3  | 917.94  | 44.34 |
| -1 | 1  | 3  | 1000.00 | 44.40 |
| -1 | -1 | -3 | 907.17  | 44.40 |
| -1 | 1  | 3  | 919.35  | 44.34 |
| -1 | 1  | 3  | 936.08  | 44.38 |
| 1  | 1  | -3 | 890.69  | 44.33 |
| -1 | 1  | 3  | 937.25  | 44.36 |
| 1  | -1 | 3  | 966.79  | 44.43 |
| 1  | 1  | 3  | 949.90  | 44.47 |
| 1  | -1 | -3 | 923.93  | 44.38 |
| -1 | 1  | -3 | 898.68  | 44.40 |
| 1  | 1  | 3  | 917.74  | 44.41 |
| -1 | 1  | -3 | 884.12  | 44.44 |
| -1 | -1 | 3  | 891.27  | 44.30 |
| -1 | 1  | -3 | 823.05  | 44.43 |
| -1 | 1  | -3 | 873.48  | 44.41 |
| -1 | -1 | 3  | 941.84  | 44.38 |
| 1  | 1  | 3  | 889.69  | 44.51 |
| -1 | -1 | 3  | 890.34  | 44.30 |
| 1  | 1  | 3  | 920.37  | 44.50 |
| 2  | -1 | 3  | 159.04  | 8.42  |
| -2 | -1 | -3 | 171.29  | 8.36  |
| -2 | 1  | 3  | 176.13  | 8.20  |
| 2  | -1 | 3  | 169.36  | 8.40  |
| -2 | -1 | -3 | 163.28  | 8.34  |
| -2 | -1 | -3 | 184.97  | 8.46  |

## CIF S3

|    |    |    |        |      |
|----|----|----|--------|------|
| -2 | 1  | 3  | 167.30 | 8.20 |
| -2 | -1 | -3 | 156.37 | 8.38 |
| -2 | -1 | -3 | 167.85 | 8.31 |
| 2  | 1  | 3  | 170.13 | 8.40 |
| -2 | 1  | -3 | 169.14 | 8.45 |
| 2  | -1 | -3 | 162.01 | 8.22 |
| -2 | -1 | 3  | 165.73 | 8.09 |
| -2 | -1 | 3  | 162.45 | 8.09 |
| -2 | -1 | 3  | 155.00 | 8.17 |
| -2 | 1  | -3 | 165.81 | 8.31 |
| 2  | -1 | -3 | 160.02 | 8.08 |
| 2  | 1  | 3  | 172.72 | 8.48 |
| -2 | 1  | -3 | 167.20 | 8.37 |
| -2 | 1  | -3 | 158.14 | 8.32 |
| -2 | 1  | -3 | 169.74 | 8.40 |
| -3 | -1 | -3 | 68.60  | 3.62 |
| -3 | -1 | -3 | 72.47  | 3.76 |
| -3 | 1  | 3  | 73.04  | 3.59 |
| 3  | -1 | 3  | 68.86  | 3.55 |
| 3  | -1 | 3  | 77.15  | 3.93 |
| -3 | -1 | -3 | 69.64  | 3.76 |
| 3  | -1 | 3  | 69.41  | 3.94 |
| -3 | -1 | -3 | 67.43  | 3.81 |
| -3 | 1  | 3  | 66.78  | 3.50 |
| -3 | 1  | 3  | 69.65  | 3.59 |
| 3  | -1 | -3 | 71.23  | 3.52 |
| 3  | 1  | 3  | 69.78  | 3.54 |
| 3  | -1 | -3 | 66.63  | 3.45 |
| 3  | 1  | 3  | 71.31  | 3.98 |
| -3 | 1  | -3 | 72.16  | 3.60 |
| -3 | 1  | -3 | 73.98  | 3.77 |
| 3  | -1 | -3 | 68.24  | 3.44 |
| -3 | 1  | -3 | 68.22  | 3.80 |
| 3  | 1  | 3  | 74.63  | 3.87 |
| 4  | -1 | 3  | 118.00 | 5.84 |
| -4 | 1  | 3  | 113.30 | 5.70 |
| -4 | 1  | 3  | 118.21 | 5.76 |
| -4 | -1 | -3 | 111.86 | 5.90 |
| 4  | -1 | 3  | 114.64 | 6.20 |
| -4 | -1 | -3 | 115.10 | 6.06 |
| -4 | -1 | -3 | 115.96 | 5.85 |

## CIF S3

|    |    |    |        |      |
|----|----|----|--------|------|
| 4  | -1 | 3  | 123.70 | 6.31 |
| -4 | -1 | -3 | 120.77 | 6.05 |
| -4 | 1  | 3  | 112.37 | 5.87 |
| 4  | 1  | 3  | 112.63 | 5.82 |
| -4 | 1  | -3 | 119.35 | 5.95 |
| 4  | 1  | 3  | 114.35 | 6.16 |
| 4  | 1  | 3  | 132.96 | 6.37 |
| -4 | 1  | -3 | 108.14 | 5.89 |
| 4  | -1 | -3 | 112.96 | 5.73 |
| 4  | -1 | -3 | 127.62 | 5.81 |
| -4 | 1  | -3 | 117.05 | 6.14 |
| -4 | 1  | -3 | 118.29 | 5.87 |
| 4  | -1 | -3 | 116.11 | 5.73 |
| -4 | 1  | -3 | 117.05 | 6.09 |
| 4  | -1 | -3 | 112.52 | 5.77 |
| 5  | -1 | 3  | 49.56  | 2.50 |
| -5 | -1 | -3 | 45.79  | 2.53 |
| -5 | -1 | -3 | 46.06  | 2.78 |
| -5 | 1  | 3  | 45.61  | 2.32 |
| 5  | -1 | 3  | 44.78  | 3.15 |
| 5  | 1  | -3 | 48.15  | 2.30 |
| -5 | -1 | -3 | 41.09  | 2.52 |
| 5  | 1  | -3 | 50.93  | 2.31 |
| -5 | -1 | -3 | 45.43  | 2.37 |
| -5 | 1  | 3  | 42.70  | 2.41 |
| -5 | 1  | 3  | 48.62  | 2.38 |
| 5  | -1 | -3 | 45.62  | 2.47 |
| 5  | -1 | -3 | 47.25  | 2.38 |
| -5 | 1  | -3 | 48.32  | 2.65 |
| 5  | -1 | -3 | 46.89  | 2.42 |
| -5 | 1  | -3 | 46.67  | 2.39 |
| 5  | 1  | 3  | 48.10  | 2.48 |
| -5 | -1 | 3  | 45.65  | 2.29 |
| -5 | 1  | -3 | 45.48  | 2.41 |
| -5 | 1  | -3 | 46.04  | 2.57 |
| -6 | -1 | -3 | 22.58  | 1.48 |
| -6 | -1 | -3 | 21.97  | 1.26 |
| -6 | 1  | 3  | 21.75  | 1.21 |
| -6 | -1 | -3 | 18.86  | 1.25 |
| -6 | 1  | 3  | 22.90  | 1.19 |
| 6  | -1 | 3  | 24.22  | 1.42 |

## CIF S3

|    |    |    |       |      |
|----|----|----|-------|------|
| 6  | 1  | -3 | 22.07 | 1.20 |
| 6  | 1  | 3  | 23.62 | 1.41 |
| 6  | -1 | -3 | 22.81 | 1.40 |
| -6 | -1 | 3  | 22.23 | 1.15 |
| -6 | 1  | -3 | 19.94 | 1.29 |
| -6 | 1  | 3  | 22.28 | 1.52 |
| -7 | 1  | 3  | 2.61  | 0.50 |
| -7 | 1  | 3  | 2.66  | 0.52 |
| 7  | -1 | 3  | 2.84  | 0.74 |
| -7 | -1 | -3 | 3.51  | 0.84 |
| -7 | -1 | -3 | 3.24  | 0.56 |
| -7 | -1 | -3 | 2.81  | 0.59 |
| -7 | -1 | -3 | 2.98  | 0.58 |
| -7 | 1  | -3 | 1.90  | 0.55 |
| 7  | 1  | 3  | 2.04  | 0.64 |
| -7 | -1 | 3  | 2.46  | 0.40 |
| -7 | 1  | -3 | 2.48  | 0.61 |
| -7 | 1  | -3 | 4.14  | 0.88 |
| -8 | 1  | 3  | 11.73 | 0.78 |
| -8 | 1  | 3  | 11.59 | 0.81 |
| -8 | -1 | -3 | 10.83 | 0.91 |
| -8 | 1  | -3 | 10.04 | 0.96 |
| -8 | -1 | 3  | 11.30 | 0.71 |
| -8 | 1  | -3 | 11.57 | 0.78 |
| -8 | 1  | -3 | 9.07  | 0.95 |
| -8 | 1  | -3 | 11.18 | 1.33 |
| -9 | -1 | -3 | 4.59  | 0.64 |
| -9 | 1  | 3  | 4.15  | 0.81 |
| -9 | -1 | -3 | 3.65  | 0.83 |
| -9 | -1 | -3 | 4.18  | 0.69 |
| -9 | -1 | -3 | 5.47  | 1.06 |
| -9 | -1 | -3 | 3.58  | 0.56 |
| -9 | 1  | 3  | 4.25  | 0.42 |
| -9 | -1 | -3 | 2.91  | 0.51 |
| -9 | 1  | 3  | 4.07  | 0.45 |
| -9 | -1 | -3 | 4.39  | 0.62 |
| -9 | 1  | -3 | 4.03  | 0.74 |
| -9 | 1  | -3 | 3.07  | 0.73 |
| -9 | -1 | 3  | 3.57  | 0.33 |
| -9 | 1  | -3 | 3.64  | 0.66 |
| -9 | -1 | 3  | 3.83  | 0.30 |

## CIF S3

|     |    |    |        |       |
|-----|----|----|--------|-------|
| -9  | 1  | -3 | 3.33   | 0.65  |
| -9  | -1 | 3  | 3.42   | 0.82  |
| -9  | 1  | -3 | 3.23   | 0.51  |
| -9  | 1  | -3 | 3.96   | 0.84  |
| -10 | 1  | 3  | 2.91   | 0.71  |
| -10 | -1 | -3 | 2.16   | 0.43  |
| -10 | 1  | -3 | 2.20   | 0.52  |
| -10 | 1  | -3 | 2.54   | 0.43  |
| -10 | -1 | 3  | 3.05   | 0.78  |
| -10 | 1  | -3 | 2.33   | 0.51  |
| -10 | 1  | -3 | 2.87   | 0.56  |
| 0   | 2  | 3  | 251.53 | 12.88 |
| 0   | 2  | 3  | 277.28 | 12.79 |
| 0   | -2 | 3  | 247.18 | 12.77 |
| 0   | 2  | 3  | 248.79 | 12.83 |
| 0   | -2 | 3  | 270.47 | 12.76 |
| 0   | -2 | 3  | 263.69 | 12.75 |
| 0   | 2  | -3 | 253.22 | 12.77 |
| 0   | -2 | -3 | 256.48 | 12.79 |
| 0   | 2  | -3 | 245.50 | 12.77 |
| 0   | -2 | -3 | 257.71 | 12.79 |
| 0   | -2 | 3  | 258.06 | 12.81 |
| 0   | 2  | -3 | 253.18 | 12.81 |
| 0   | -2 | -3 | 283.49 | 12.86 |
| 0   | 2  | 3  | 266.29 | 12.91 |
| -1  | 2  | 3  | 0.49   | 0.44  |
| 1   | 2  | -3 | -0.04  | 0.12  |
| -1  | -2 | -3 | 1.11   | 0.70  |
| -1  | -2 | -3 | 2.50   | 0.82  |
| 1   | -2 | 3  | 0.68   | 0.63  |
| 1   | 2  | -3 | 0.61   | 0.43  |
| 1   | 2  | -3 | 0.23   | 0.38  |
| 1   | 2  | -3 | 0.60   | 0.36  |
| 1   | -2 | 3  | 0.16   | 0.57  |
| -1  | 2  | 3  | 0.29   | 0.55  |
| -1  | 2  | 3  | 0.19   | 0.35  |
| -1  | -2 | -3 | 0.92   | 0.57  |
| 1   | -2 | 3  | -0.15  | 0.71  |
| -1  | 2  | 3  | -0.48  | 0.47  |
| -1  | -2 | -3 | 0.06   | 0.68  |
| -1  | 2  | 3  | 0.50   | 0.58  |



## CIF S3

|    |    |    |        |      |
|----|----|----|--------|------|
| -1 | -2 | 3  | 0.11   | 0.33 |
| -1 | 2  | -3 | 0.15   | 0.63 |
| 1  | -2 | -3 | 0.60   | 0.61 |
| -1 | -2 | 3  | -0.01  | 0.38 |
| -1 | -2 | 3  | 0.88   | 0.53 |
| 1  | 2  | 3  | 0.31   | 0.64 |
| 1  | -2 | -3 | 0.56   | 0.46 |
| -1 | 2  | -3 | 0.14   | 0.52 |
| -1 | 2  | -3 | 0.04   | 0.19 |
| 1  | 2  | 3  | 0.65   | 0.68 |
| 1  | 2  | 3  | 0.85   | 0.68 |
| -1 | 2  | -3 | -0.29  | 0.52 |
| 1  | 2  | 3  | 0.57   | 0.54 |
| -2 | -2 | -3 | 141.25 | 7.13 |
| -2 | 2  | 3  | 151.21 | 7.04 |
| 2  | 2  | -3 | 141.57 | 6.90 |
| 2  | -2 | 3  | 141.77 | 7.26 |
| -2 | -2 | -3 | 129.81 | 7.18 |
| -2 | -2 | -3 | 146.37 | 7.19 |
| -2 | -2 | -3 | 136.32 | 7.16 |
| -2 | 2  | 3  | 134.15 | 7.04 |
| 2  | -2 | 3  | 146.60 | 7.22 |
| -2 | -2 | -3 | 143.90 | 7.11 |
| -2 | 2  | 3  | 146.46 | 7.04 |
| 2  | -2 | -3 | 138.76 | 7.09 |
| 2  | 2  | 3  | 144.33 | 7.28 |
| -2 | -2 | 3  | 135.42 | 7.04 |
| -2 | 2  | -3 | 146.25 | 7.18 |
| -2 | 2  | -3 | 139.26 | 7.11 |
| 2  | 2  | 3  | 143.36 | 7.20 |
| -2 | 2  | -3 | 134.95 | 7.15 |
| 2  | -2 | -3 | 133.23 | 6.88 |
| -2 | 2  | -3 | 144.56 | 7.20 |
| 2  | -2 | -3 | 130.22 | 6.90 |
| -2 | -2 | 3  | 144.52 | 6.90 |
| 2  | -2 | -3 | 141.29 | 6.96 |
| -2 | -2 | 3  | 141.22 | 6.91 |
| -3 | -2 | -3 | 65.49  | 3.56 |
| -3 | 2  | 3  | 67.79  | 3.46 |
| 3  | -2 | 3  | 62.99  | 3.35 |
| 3  | -2 | 3  | 64.13  | 3.73 |

## CIF S3

|    |    |    |       |      |
|----|----|----|-------|------|
| -3 | 2  | 3  | 65.16 | 3.33 |
| -3 | -2 | -3 | 66.47 | 3.64 |
| 3  | -2 | 3  | 66.89 | 3.80 |
| 3  | -2 | -3 | 71.13 | 3.38 |
| -3 | 2  | -3 | 61.73 | 3.38 |
| -3 | -2 | 3  | 67.32 | 3.23 |
| -3 | -2 | 3  | 66.95 | 3.23 |
| 3  | 2  | 3  | 65.37 | 3.32 |
| -3 | 2  | -3 | 65.94 | 3.63 |
| 3  | 2  | 3  | 61.58 | 3.77 |
| 3  | -2 | -3 | 68.10 | 3.35 |
| 3  | 2  | 3  | 64.13 | 3.65 |
| 3  | -2 | -3 | 63.27 | 3.28 |
| -4 | -2 | -3 | 53.99 | 2.99 |
| -4 | 2  | 3  | 56.65 | 2.84 |
| 4  | -2 | 3  | 57.99 | 2.98 |
| -4 | 2  | 3  | 57.39 | 3.11 |
| 4  | -2 | 3  | 60.06 | 3.54 |
| -4 | 2  | 3  | 58.54 | 2.94 |
| 4  | -2 | 3  | 62.82 | 3.49 |
| -4 | -2 | -3 | 56.63 | 3.22 |
| 4  | 2  | 3  | 56.04 | 2.94 |
| 4  | 2  | 3  | 53.36 | 3.52 |
| 4  | -2 | -3 | 58.57 | 2.89 |
| 4  | -2 | -3 | 60.62 | 3.02 |
| -4 | 2  | -3 | 57.36 | 3.37 |
| -4 | 2  | -3 | 52.55 | 2.89 |
| 4  | 2  | 3  | 55.56 | 3.31 |
| -4 | 2  | -3 | 54.83 | 2.94 |
| -4 | 2  | -3 | 58.45 | 3.04 |
| 4  | -2 | -3 | 59.13 | 2.96 |
| -5 | -2 | -3 | 35.87 | 2.10 |
| -5 | -2 | -3 | 37.13 | 2.00 |
| -5 | -2 | -3 | 36.90 | 1.95 |
| -5 | 2  | 3  | 38.93 | 2.49 |
| 5  | -2 | 3  | 37.12 | 2.76 |
| -5 | -2 | -3 | 34.86 | 1.95 |
| -5 | 2  | 3  | 37.44 | 2.03 |
| 5  | -2 | 3  | 38.40 | 2.11 |
| -5 | -2 | -3 | 36.99 | 2.37 |
| 5  | 2  | -3 | 38.57 | 1.84 |

## CIF S3

|    |    |    |       |      |
|----|----|----|-------|------|
| -5 | 2  | 3  | 34.76 | 1.91 |
| -5 | 2  | 3  | 37.67 | 1.91 |
| -5 | -2 | -3 | 38.00 | 1.94 |
| -5 | 2  | -3 | 37.74 | 1.96 |
| 5  | -2 | -3 | 40.48 | 2.03 |
| -5 | 2  | -3 | 36.94 | 2.02 |
| -5 | -2 | 3  | 36.84 | 1.84 |
| 5  | -2 | -3 | 35.90 | 1.97 |
| -5 | 2  | -3 | 37.32 | 2.19 |
| 5  | -2 | -3 | 38.97 | 2.11 |
| -5 | 2  | -3 | 37.05 | 2.00 |
| 5  | 2  | 3  | 37.70 | 2.06 |
| -6 | 2  | 3  | 5.70  | 0.55 |
| -6 | 2  | 3  | 5.35  | 0.69 |
| -6 | -2 | -3 | 4.84  | 0.59 |
| -6 | 2  | 3  | 5.61  | 0.58 |
| -6 | -2 | -3 | 5.15  | 0.61 |
| -6 | -2 | -3 | 5.41  | 0.59 |
| 6  | -2 | 3  | 4.69  | 0.73 |
| -6 | -2 | -3 | 5.40  | 0.82 |
| 6  | 2  | -3 | 5.61  | 0.45 |
| 6  | -2 | -3 | 4.22  | 0.82 |
| 6  | -2 | -3 | 5.16  | 0.71 |
| -6 | 2  | -3 | 3.29  | 0.67 |
| -6 | -2 | 3  | 5.14  | 0.38 |
| 6  | 2  | 3  | 4.32  | 0.71 |
| 6  | -2 | -3 | 5.69  | 0.73 |
| -7 | 2  | 3  | 13.77 | 0.94 |
| -7 | -2 | -3 | 12.93 | 0.89 |
| -7 | 2  | 3  | 13.50 | 0.88 |
| -7 | -2 | -3 | 11.90 | 0.85 |
| -7 | -2 | -3 | 10.61 | 0.88 |
| -7 | -2 | -3 | 12.33 | 1.11 |
| 7  | -2 | 3  | 13.19 | 1.17 |
| -7 | -2 | -3 | 13.21 | 0.92 |
| -7 | -2 | 3  | 13.76 | 0.75 |
| 7  | 2  | 3  | 11.86 | 1.07 |
| -7 | 2  | -3 | 13.33 | 0.93 |
| -7 | 2  | -3 | 13.48 | 1.02 |
| -7 | 2  | -3 | 13.01 | 1.25 |
| -8 | 2  | 3  | 18.57 | 1.06 |

## CIF S3

|     |    |    |       |      |
|-----|----|----|-------|------|
| -8  | -2 | -3 | 19.23 | 1.17 |
| -8  | -2 | -3 | 17.42 | 1.19 |
| -8  | -2 | -3 | 17.66 | 1.28 |
| -8  | 2  | 3  | 15.35 | 1.34 |
| -8  | 2  | 3  | 18.68 | 1.07 |
| -8  | -2 | -3 | 19.89 | 1.55 |
| -8  | -2 | -3 | 18.00 | 1.16 |
| -8  | 2  | 3  | 19.17 | 1.12 |
| -8  | -2 | -3 | 19.77 | 1.21 |
| -8  | -2 | -3 | 17.13 | 1.16 |
| -8  | 2  | 3  | 19.31 | 1.15 |
| -8  | 2  | -3 | 17.88 | 1.19 |
| -8  | 2  | -3 | 19.15 | 1.21 |
| -8  | -2 | 3  | 18.48 | 0.98 |
| -8  | 2  | -3 | 19.42 | 1.27 |
| -8  | -2 | 3  | 19.14 | 1.02 |
| -8  | 2  | -3 | 19.76 | 1.36 |
| -8  | 2  | -3 | 18.93 | 1.28 |
| -8  | 2  | -3 | 18.03 | 1.31 |
| -8  | -2 | 3  | 17.43 | 0.99 |
| -8  | 2  | -3 | 20.08 | 1.18 |
| -9  | -2 | -3 | 11.62 | 0.82 |
| -9  | -2 | -3 | 10.53 | 0.87 |
| -9  | 2  | 3  | 10.12 | 0.66 |
| -9  | 2  | 3  | 10.06 | 0.73 |
| -9  | -2 | -3 | 9.93  | 0.73 |
| -9  | -2 | -3 | 9.82  | 0.68 |
| -9  | -2 | -3 | 9.58  | 0.82 |
| -9  | 2  | 3  | 10.58 | 0.95 |
| -9  | 2  | -3 | 9.83  | 0.93 |
| -9  | 2  | -3 | 9.84  | 0.90 |
| -9  | 2  | -3 | 10.98 | 1.01 |
| -9  | 2  | -3 | 9.65  | 0.85 |
| -9  | 2  | -3 | 11.12 | 0.87 |
| -9  | 2  | -3 | 10.78 | 0.83 |
| -10 | 2  | 3  | 4.46  | 0.32 |
| -10 | 2  | 3  | 4.02  | 0.31 |
| -10 | 2  | 3  | 3.77  | 0.69 |
| -10 | 2  | -3 | 4.14  | 0.58 |
| -10 | 2  | -3 | 4.41  | 0.52 |
| -10 | 2  | -3 | 4.29  | 0.60 |

## CIF S3

|     |    |    |        |      |
|-----|----|----|--------|------|
| -10 | 2  | -3 | 4.72   | 0.70 |
| 0   | 3  | 3  | 135.35 | 6.67 |
| 0   | -3 | -3 | 131.32 | 6.78 |
| 0   | -3 | 3  | 129.62 | 6.65 |
| 0   | 3  | 3  | 137.44 | 6.84 |
| 0   | 3  | -3 | 129.38 | 6.66 |
| 0   | 3  | 3  | 124.34 | 6.74 |
| 0   | 3  | -3 | 136.84 | 6.72 |
| 0   | -3 | 3  | 128.31 | 6.67 |
| 0   | -3 | 3  | 135.11 | 6.75 |
| 0   | -3 | -3 | 132.08 | 6.72 |
| 0   | 3  | 3  | 133.53 | 6.83 |
| 0   | 3  | -3 | 129.47 | 6.67 |
| -1  | 3  | 3  | 28.07  | 2.02 |
| 1   | -3 | 3  | 29.75  | 2.03 |
| -1  | 3  | 3  | 31.85  | 1.99 |
| -1  | 3  | 3  | 33.37  | 2.06 |
| 1   | -3 | 3  | 32.29  | 2.07 |
| 1   | 3  | -3 | 32.07  | 1.79 |
| 1   | -3 | 3  | 32.03  | 1.97 |
| 1   | 3  | -3 | 31.33  | 1.66 |
| -1  | 3  | 3  | 32.07  | 1.89 |
| 1   | 3  | -3 | 30.82  | 1.81 |
| -1  | -3 | -3 | 31.90  | 2.01 |
| 1   | 3  | -3 | 31.65  | 1.85 |
| -1  | -3 | -3 | 33.21  | 2.15 |
| -1  | -3 | -3 | 31.85  | 1.98 |
| -1  | -3 | 3  | 31.00  | 1.82 |
| 1   | -3 | -3 | 29.90  | 1.86 |
| -1  | 3  | -3 | 31.56  | 2.01 |
| -1  | 3  | -3 | 31.97  | 1.93 |
| 1   | 3  | 3  | 33.62  | 2.05 |
| -1  | 3  | -3 | 31.22  | 1.97 |
| -1  | -3 | 3  | 30.83  | 2.00 |
| 1   | 3  | 3  | 29.82  | 2.11 |
| 1   | -3 | -3 | 30.85  | 1.81 |
| 1   | -3 | -3 | 32.05  | 2.02 |
| -1  | -3 | 3  | 28.60  | 1.78 |
| -2  | 3  | 3  | 66.25  | 4.08 |
| -2  | -3 | -3 | 75.44  | 4.10 |
| 2   | 3  | -3 | 77.10  | 3.93 |

## CIF S3

|    |    |    |       |      |
|----|----|----|-------|------|
| -2 | -3 | -3 | 76.18 | 4.22 |
| 2  | 3  | -3 | 76.20 | 3.78 |
| 2  | -3 | 3  | 77.66 | 4.23 |
| -2 | -3 | -3 | 79.68 | 4.76 |
| -2 | -3 | -3 | 80.79 | 4.19 |
| 2  | 3  | -3 | 81.14 | 3.93 |
| -2 | -3 | -3 | 78.75 | 4.12 |
| -2 | 3  | 3  | 73.71 | 4.04 |
| 2  | -3 | 3  | 78.96 | 4.24 |
| -2 | 3  | 3  | 77.22 | 4.12 |
| 2  | -3 | -3 | 74.81 | 3.85 |
| -2 | -3 | 3  | 80.06 | 3.91 |
| -2 | 3  | -3 | 79.69 | 4.21 |
| 2  | 3  | 3  | 71.61 | 3.86 |
| -2 | 3  | -3 | 80.03 | 4.16 |
| 2  | -3 | -3 | 72.02 | 3.86 |
| -2 | -3 | 3  | 78.04 | 3.81 |
| 2  | 3  | 3  | 67.99 | 4.22 |
| -2 | -3 | 3  | 82.22 | 3.90 |
| 2  | 3  | 3  | 78.15 | 4.20 |
| 2  | -3 | -3 | 79.88 | 3.90 |
| 2  | -3 | -3 | 79.28 | 4.13 |
| 2  | -3 | -3 | 83.66 | 3.97 |
| -2 | 3  | -3 | 70.34 | 3.89 |
| -2 | -3 | 3  | 75.98 | 4.08 |
| -3 | 3  | 3  | 27.64 | 1.63 |
| -3 | -3 | -3 | 29.45 | 2.15 |
| -3 | -3 | -3 | 25.43 | 1.62 |
| -3 | -3 | -3 | 26.62 | 1.47 |
| 3  | -3 | 3  | 28.10 | 2.12 |
| 3  | -3 | 3  | 28.50 | 1.60 |
| -3 | -3 | -3 | 28.38 | 1.96 |
| 3  | 3  | -3 | 29.01 | 1.55 |
| -3 | -3 | -3 | 27.72 | 1.87 |
| -3 | 3  | 3  | 25.08 | 1.66 |
| 3  | -3 | 3  | 29.33 | 2.10 |
| -3 | 3  | 3  | 28.49 | 1.80 |
| -3 | -3 | 3  | 27.88 | 1.52 |
| -3 | 3  | -3 | 27.47 | 1.96 |
| 3  | 3  | 3  | 29.48 | 1.54 |
| 3  | -3 | -3 | 25.68 | 1.86 |

## CIF S3

|    |    |    |       |      |
|----|----|----|-------|------|
| 3  | -3 | -3 | 28.06 | 1.69 |
| -3 | -3 | 3  | 27.76 | 1.41 |
| 3  | -3 | -3 | 26.25 | 1.52 |
| 3  | 3  | 3  | 26.26 | 1.98 |
| 3  | -3 | -3 | 30.69 | 1.63 |
| -3 | -3 | 3  | 28.17 | 1.43 |
| -3 | -3 | 3  | 26.77 | 1.37 |
| -3 | 3  | -3 | 29.02 | 1.65 |
| -3 | -3 | 3  | 26.96 | 1.53 |
| 3  | 3  | 3  | 28.87 | 2.12 |
| -3 | -3 | 3  | 27.64 | 1.38 |
| -4 | -3 | -3 | 12.09 | 0.81 |
| -4 | 3  | 3  | 13.70 | 1.03 |
| 4  | -3 | 3  | 12.24 | 1.64 |
| -4 | 3  | 3  | 13.14 | 1.20 |
| -4 | -3 | -3 | 11.78 | 1.01 |
| -4 | -3 | -3 | 12.26 | 0.92 |
| 4  | -3 | 3  | 11.99 | 1.05 |
| -4 | -3 | -3 | 11.02 | 1.25 |
| 4  | -3 | 3  | 10.35 | 1.47 |
| -4 | -3 | -3 | 10.64 | 1.05 |
| -4 | 3  | 3  | 13.26 | 0.78 |
| 4  | 3  | 3  | 13.77 | 1.39 |
| -4 | -3 | 3  | 13.50 | 0.74 |
| -4 | 3  | -3 | 11.64 | 0.94 |
| 4  | -3 | -3 | 15.80 | 1.16 |
| 4  | -3 | -3 | 13.90 | 0.99 |
| -4 | -3 | 3  | 11.86 | 0.74 |
| 4  | -3 | -3 | 12.47 | 1.11 |
| -4 | 3  | -3 | 11.40 | 0.90 |
| 4  | 3  | 3  | 10.98 | 1.56 |
| -4 | 3  | -3 | 12.35 | 1.15 |
| 4  | 3  | 3  | 12.94 | 0.90 |
| -5 | -3 | -3 | 35.56 | 1.92 |
| -5 | 3  | 3  | 35.42 | 1.92 |
| -5 | -3 | -3 | 36.44 | 2.06 |
| 5  | 3  | -3 | 38.39 | 1.83 |
| -5 | -3 | -3 | 37.07 | 1.89 |
| 5  | -3 | 3  | 36.62 | 2.09 |
| -5 | -3 | -3 | 36.98 | 2.01 |
| -5 | -3 | -3 | 31.22 | 2.54 |

## CIF S3

|    |    |    |       |      |
|----|----|----|-------|------|
| 5  | -3 | 3  | 28.94 | 2.64 |
| -5 | 3  | 3  | 37.61 | 2.07 |
| -5 | 3  | 3  | 36.07 | 1.88 |
| 5  | -3 | -3 | 38.57 | 2.04 |
| -5 | 3  | -3 | 35.77 | 1.96 |
| 5  | -3 | -3 | 37.97 | 2.13 |
| -5 | 3  | -3 | 35.42 | 1.94 |
| -5 | 3  | -3 | 36.59 | 2.00 |
| 5  | 3  | 3  | 36.39 | 2.02 |
| -5 | 3  | -3 | 37.84 | 2.14 |
| -6 | 3  | 3  | 22.82 | 1.44 |
| 6  | 3  | -3 | 22.10 | 1.24 |
| -6 | -3 | -3 | 22.86 | 1.46 |
| -6 | 3  | 3  | 22.69 | 1.31 |
| -6 | -3 | -3 | 21.65 | 1.30 |
| -6 | -3 | -3 | 19.89 | 1.27 |
| -6 | 3  | 3  | 21.33 | 1.25 |
| -6 | -3 | -3 | 22.32 | 1.54 |
| -6 | -3 | -3 | 23.91 | 1.26 |
| 6  | -3 | 3  | 22.03 | 1.51 |
| -6 | -3 | 3  | 22.63 | 1.15 |
| 6  | -3 | -3 | 22.84 | 1.46 |
| -6 | 3  | -3 | 21.39 | 1.33 |
| 6  | -3 | -3 | 21.53 | 1.56 |
| 6  | 3  | 3  | 21.28 | 1.41 |
| -7 | 3  | 3  | 9.30  | 0.84 |
| 7  | -3 | 3  | 10.40 | 1.10 |
| -7 | -3 | -3 | 10.08 | 1.03 |
| -7 | 3  | 3  | 11.61 | 0.80 |
| -7 | -3 | -3 | 9.48  | 0.77 |
| -7 | -3 | -3 | 10.78 | 0.86 |
| -7 | 3  | 3  | 9.92  | 0.90 |
| -7 | -3 | -3 | 9.68  | 0.73 |
| -7 | 3  | -3 | 9.05  | 0.94 |
| 7  | -3 | -3 | 9.83  | 0.99 |
| -7 | 3  | -3 | 10.63 | 0.88 |
| -7 | -3 | 3  | 10.90 | 0.65 |
| 7  | 3  | 3  | 9.05  | 1.02 |
| -8 | 3  | 3  | 31.86 | 1.75 |
| -8 | -3 | -3 | 33.02 | 1.82 |
| -8 | -3 | -3 | 34.63 | 2.11 |



## CIF S3

|     |    |    |       |      |
|-----|----|----|-------|------|
| -8  | -3 | -3 | 32.69 | 1.81 |
| -8  | 3  | 3  | 34.17 | 1.84 |
| -8  | -3 | -3 | 33.08 | 1.83 |
| -8  | 3  | 3  | 32.21 | 1.92 |
| -8  | 3  | 3  | 33.23 | 1.78 |
| -8  | 3  | 3  | 35.49 | 1.85 |
| -8  | 3  | 3  | 35.20 | 1.84 |
| -8  | -3 | -3 | 33.97 | 1.85 |
| -8  | 3  | 3  | 33.81 | 1.79 |
| -8  | -3 | -3 | 32.88 | 1.81 |
| -8  | 3  | -3 | 33.68 | 1.90 |
| -8  | -3 | 3  | 33.80 | 1.68 |
| -8  | 3  | -3 | 33.53 | 1.90 |
| -8  | -3 | 3  | 34.31 | 1.69 |
| -8  | -3 | 3  | 36.39 | 1.72 |
| -8  | 3  | -3 | 34.31 | 1.86 |
| -8  | 3  | -3 | 31.30 | 1.86 |
| -8  | 3  | -3 | 34.80 | 1.95 |
| -8  | 3  | -3 | 33.30 | 1.86 |
| -8  | 3  | -3 | 33.22 | 1.88 |
| -9  | 3  | 3  | 1.23  | 0.51 |
| -9  | -3 | -3 | 0.75  | 0.35 |
| -9  | -3 | -3 | 0.75  | 0.29 |
| -9  | 3  | 3  | 0.92  | 0.26 |
| -9  | 3  | 3  | 2.19  | 0.48 |
| -9  | 3  | -3 | 0.97  | 0.46 |
| -9  | 3  | -3 | 0.50  | 0.48 |
| -9  | 3  | -3 | 0.64  | 0.54 |
| -9  | 3  | -3 | 1.34  | 0.41 |
| -9  | 3  | -3 | 0.83  | 0.76 |
| -10 | 3  | 3  | 1.76  | 0.32 |
| -10 | 3  | 3  | 1.75  | 0.29 |
| -10 | 3  | 3  | 1.74  | 0.46 |
| -10 | 3  | -3 | 1.80  | 0.40 |
| -10 | 3  | -3 | 2.20  | 0.40 |
| -10 | 3  | -3 | 2.43  | 0.45 |
| -10 | 3  | -3 | 3.14  | 0.64 |
| -10 | 3  | -3 | 1.99  | 0.57 |
| 0   | -4 | 3  | 13.63 | 1.42 |
| 0   | 4  | -3 | 13.62 | 1.21 |
| 0   | -4 | 3  | 14.14 | 1.20 |

## CIF S3

|    |    |    |        |       |
|----|----|----|--------|-------|
| 0  | 4  | -3 | 12.38  | 0.95  |
| 0  | 4  | 3  | 12.32  | 1.42  |
| 0  | 4  | -3 | 13.64  | 1.27  |
| 0  | 4  | 3  | 12.39  | 1.25  |
| 0  | 4  | -3 | 13.06  | 0.93  |
| 0  | -4 | -3 | 13.59  | 1.39  |
| 0  | 4  | -3 | 12.55  | 1.10  |
| 0  | -4 | 3  | 13.75  | 1.27  |
| 0  | -4 | -3 | 12.57  | 1.37  |
| 1  | 4  | -3 | 195.89 | 9.87  |
| 1  | 4  | -3 | 173.57 | 9.89  |
| -1 | -4 | -3 | 204.64 | 10.03 |
| -1 | 4  | 3  | 217.46 | 10.06 |
| 1  | 4  | -3 | 191.04 | 9.71  |
| 1  | 4  | -3 | 192.14 | 9.68  |
| 1  | -4 | 3  | 209.13 | 10.00 |
| -1 | -4 | -3 | 193.35 | 10.00 |
| -1 | 4  | 3  | 217.19 | 10.10 |
| 1  | 4  | -3 | 195.83 | 9.88  |
| -1 | -4 | 3  | 206.49 | 9.86  |
| 1  | -4 | -3 | 196.87 | 9.75  |
| -1 | 4  | -3 | 187.37 | 9.77  |
| 1  | -4 | -3 | 186.24 | 10.00 |
| 1  | 4  | 3  | 187.91 | 10.00 |
| -1 | 4  | -3 | 204.78 | 10.01 |
| 1  | -4 | -3 | 202.73 | 9.81  |
| -1 | 4  | -3 | 193.38 | 9.94  |
| -1 | -4 | 3  | 191.88 | 9.94  |
| 1  | 4  | 3  | 217.57 | 10.16 |
| -1 | 4  | -3 | 184.94 | 10.00 |
| 2  | -4 | 3  | 3.93   | 1.09  |
| -2 | -4 | -3 | 6.12   | 1.04  |
| -2 | -4 | -3 | 6.65   | 1.29  |
| 2  | -4 | 3  | 6.63   | 0.83  |
| -2 | 4  | 3  | 4.55   | 1.06  |
| 2  | 4  | -3 | 5.42   | 0.55  |
| 2  | 4  | -3 | 6.05   | 0.83  |
| 2  | 4  | -3 | 5.21   | 0.46  |
| -2 | 4  | 3  | 5.85   | 0.98  |
| 2  | 4  | -3 | 5.64   | 0.82  |
| -2 | 4  | 3  | 6.25   | 1.15  |

## CIF S3

|    |    |    |      |      |
|----|----|----|------|------|
| 2  | -4 | 3  | 6.65 | 1.26 |
| 2  | -4 | -3 | 6.10 | 0.91 |
| -2 | 4  | -3 | 3.22 | 1.06 |
| -2 | -4 | 3  | 5.50 | 0.82 |
| 2  | 4  | 3  | 5.85 | 0.98 |
| -2 | 4  | -3 | 6.46 | 0.73 |
| 2  | -4 | -3 | 5.88 | 1.17 |
| -2 | 4  | -3 | 6.63 | 1.15 |
| -2 | -4 | 3  | 5.76 | 0.61 |
| 2  | 4  | 3  | 4.68 | 1.23 |
| 2  | -4 | -3 | 5.37 | 0.69 |
| 2  | -4 | -3 | 6.58 | 1.02 |
| 2  | 4  | 3  | 5.53 | 0.66 |
| -2 | -4 | 3  | 6.19 | 1.17 |
| 3  | 4  | -3 | 6.72 | 0.59 |
| -3 | -4 | -3 | 8.18 | 1.40 |
| 3  | -4 | 3  | 7.56 | 0.80 |
| 3  | -4 | 3  | 7.32 | 1.36 |
| -3 | -4 | -3 | 7.00 | 0.63 |
| -3 | 4  | 3  | 6.89 | 1.09 |
| 3  | 4  | -3 | 7.47 | 0.80 |
| -3 | -4 | -3 | 6.04 | 1.13 |
| 3  | -4 | 3  | 6.14 | 1.20 |
| -3 | 4  | 3  | 5.79 | 1.07 |
| 3  | 4  | -3 | 7.11 | 0.47 |
| -3 | -4 | -3 | 6.76 | 0.82 |
| -3 | 4  | 3  | 6.95 | 0.89 |
| 3  | -4 | -3 | 6.94 | 1.03 |
| -3 | -4 | 3  | 5.57 | 0.48 |
| 3  | -4 | -3 | 6.04 | 0.76 |
| 3  | -4 | -3 | 6.39 | 0.89 |
| 3  | 4  | 3  | 7.58 | 1.37 |
| -3 | -4 | 3  | 7.38 | 0.77 |
| -3 | -4 | 3  | 7.41 | 0.47 |
| -3 | -4 | 3  | 5.96 | 0.57 |
| -3 | 4  | -3 | 5.31 | 0.69 |
| -3 | -4 | 3  | 6.53 | 0.45 |
| -3 | 4  | -3 | 5.93 | 0.76 |
| 3  | 4  | 3  | 6.88 | 1.15 |
| -3 | 4  | -3 | 7.50 | 0.84 |
| 3  | -4 | -3 | 6.29 | 1.18 |

## CIF S3

|    |    |    |       |      |
|----|----|----|-------|------|
| 3  | 4  | 3  | 6.84  | 0.65 |
| -3 | 4  | -3 | 6.40  | 1.20 |
| 4  | 4  | -3 | 10.09 | 0.64 |
| -4 | -4 | -3 | 10.94 | 0.96 |
| -4 | -4 | -3 | 11.74 | 0.76 |
| -4 | -4 | -3 | 10.60 | 1.50 |
| 4  | -4 | 3  | 10.84 | 0.96 |
| 4  | -4 | 3  | 11.71 | 1.62 |
| -4 | 4  | 3  | 7.95  | 1.19 |
| -4 | 4  | 3  | 10.53 | 1.08 |
| -4 | -4 | -3 | 9.54  | 1.23 |
| -4 | -4 | 3  | 10.45 | 0.60 |
| -4 | -4 | 3  | 10.76 | 0.80 |
| -4 | 4  | -3 | 9.83  | 1.09 |
| 4  | -4 | -3 | 9.31  | 1.05 |
| -4 | 4  | -3 | 9.42  | 0.89 |
| 4  | -4 | -3 | 10.91 | 0.92 |
| -4 | -4 | 3  | 10.18 | 0.61 |
| -4 | 4  | -3 | 9.90  | 0.91 |
| 4  | -4 | -3 | 11.78 | 1.00 |
| 4  | 4  | 3  | 11.28 | 0.86 |
| 5  | 4  | -3 | 18.83 | 1.03 |
| -5 | -4 | -3 | 18.72 | 1.08 |
| 5  | -4 | 3  | 18.41 | 1.35 |
| -5 | -4 | -3 | 18.64 | 1.36 |
| -5 | 4  | 3  | 18.41 | 1.40 |
| -5 | 4  | 3  | 16.83 | 1.14 |
| -5 | -4 | -3 | 19.38 | 1.32 |
| 5  | -4 | 3  | 18.82 | 2.72 |
| -5 | -4 | -3 | 18.04 | 1.09 |
| -5 | 4  | -3 | 17.52 | 1.19 |
| -5 | -4 | 3  | 17.08 | 0.99 |
| 5  | 4  | 3  | 18.38 | 1.23 |
| 5  | -4 | -3 | 18.67 | 1.27 |
| -5 | 4  | -3 | 18.96 | 1.16 |
| 5  | -4 | -3 | 19.12 | 1.31 |
| 5  | -4 | -3 | 17.95 | 1.43 |
| -5 | 4  | -3 | 18.50 | 1.24 |
| -6 | 4  | 3  | 21.44 | 1.37 |
| -6 | -4 | -3 | 22.05 | 1.27 |
| 6  | -4 | 3  | 21.77 | 1.51 |

## CIF S3

|    |    |    |       |      |
|----|----|----|-------|------|
| -6 | -4 | -3 | 21.40 | 1.27 |
| -6 | -4 | -3 | 22.16 | 1.48 |
| -6 | -4 | -3 | 22.34 | 1.33 |
| -6 | -4 | -3 | 23.31 | 1.61 |
| -6 | -4 | -3 | 21.62 | 1.27 |
| -6 | 4  | 3  | 20.05 | 1.27 |
| -6 | 4  | 3  | 24.43 | 1.56 |
| -6 | -4 | -3 | 21.54 | 1.77 |
| 6  | 4  | 3  | 22.10 | 1.44 |
| 6  | -4 | -3 | 22.01 | 1.54 |
| 6  | -4 | -3 | 22.79 | 1.64 |
| -6 | -4 | 3  | 23.26 | 1.18 |
| -6 | 4  | -3 | 22.79 | 1.35 |
| 6  | -4 | -3 | 23.13 | 1.51 |
| -6 | 4  | -3 | 21.33 | 1.38 |
| -7 | 4  | 3  | 34.74 | 1.97 |
| -7 | 4  | 3  | 35.10 | 1.89 |
| -7 | -4 | -3 | 33.60 | 1.77 |
| -7 | -4 | -3 | 34.57 | 1.85 |
| 7  | -4 | 3  | 29.09 | 2.06 |
| -7 | -4 | -3 | 34.91 | 1.74 |
| -7 | -4 | -3 | 30.89 | 1.97 |
| -7 | 4  | -3 | 33.22 | 1.87 |
| -7 | -4 | 3  | 34.64 | 1.72 |
| 7  | -4 | -3 | 30.36 | 2.02 |
| -7 | 4  | -3 | 34.55 | 1.94 |
| 7  | 4  | 3  | 32.88 | 2.03 |
| -8 | -4 | -3 | 2.96  | 0.60 |
| -8 | -4 | -3 | 3.63  | 0.65 |
| -8 | -4 | -3 | 1.31  | 0.98 |
| -8 | -4 | -3 | 3.73  | 0.61 |
| -8 | 4  | 3  | 3.26  | 0.65 |
| -8 | 4  | 3  | 2.44  | 0.66 |
| -8 | 4  | 3  | 2.90  | 0.62 |
| -8 | 4  | 3  | 2.32  | 0.65 |
| -8 | -4 | -3 | 2.33  | 0.62 |
| -8 | 4  | 3  | 3.45  | 0.79 |
| -8 | 4  | 3  | 2.68  | 0.71 |
| -8 | 4  | -3 | 3.15  | 0.74 |
| -8 | 4  | -3 | 2.77  | 0.59 |
| -8 | -4 | 3  | 2.60  | 0.30 |

## CIF S3

|     |    |    |       |      |
|-----|----|----|-------|------|
| -8  | 4  | -3 | 3.63  | 0.82 |
| -8  | 4  | -3 | 3.22  | 0.92 |
| -8  | 4  | -3 | 2.72  | 0.52 |
| -8  | 4  | -3 | 3.14  | 0.78 |
| -8  | 4  | -3 | 4.59  | 0.86 |
| -8  | 4  | -3 | 1.62  | 0.88 |
| -8  | -4 | 3  | 3.16  | 0.34 |
| -8  | -4 | 3  | 3.13  | 0.39 |
| -9  | 4  | 3  | 1.53  | 0.41 |
| -9  | 4  | 3  | 0.64  | 0.49 |
| -9  | 4  | 3  | 0.66  | 0.32 |
| -9  | -4 | -3 | 0.88  | 0.29 |
| -9  | -4 | -3 | 0.14  | 0.34 |
| -9  | 4  | 3  | 1.11  | 0.38 |
| -9  | 4  | -3 | 1.03  | 0.44 |
| -9  | 4  | -3 | 0.59  | 0.39 |
| -9  | 4  | -3 | 0.92  | 0.45 |
| -9  | 4  | -3 | 1.04  | 0.51 |
| -9  | 4  | -3 | 1.51  | 0.49 |
| -10 | 4  | 3  | 3.63  | 0.64 |
| -10 | -4 | -3 | 3.18  | 0.36 |
| -10 | 4  | 3  | 2.95  | 0.34 |
| -10 | 4  | 3  | 2.85  | 0.38 |
| -10 | 4  | -3 | 2.76  | 0.35 |
| -10 | 4  | -3 | 2.89  | 0.53 |
| -10 | 4  | -3 | 3.14  | 0.47 |
| -10 | 4  | -3 | 3.80  | 0.60 |
| -10 | 4  | -3 | 2.97  | 0.59 |
| 0   | 5  | -3 | 85.75 | 4.57 |
| 0   | -5 | 3  | 83.14 | 4.63 |
| 0   | 5  | 3  | 93.24 | 4.72 |
| 0   | 5  | -3 | 88.29 | 4.66 |
| 0   | -5 | 3  | 74.32 | 4.47 |
| 0   | 5  | 3  | 82.49 | 4.26 |
| 0   | 5  | -3 | 85.00 | 4.32 |
| 0   | -5 | -3 | 83.83 | 4.67 |
| 0   | 5  | 3  | 81.44 | 4.25 |
| 0   | 5  | -3 | 81.64 | 4.55 |
| 0   | 5  | -3 | 82.67 | 4.27 |
| 0   | -5 | -3 | 86.40 | 4.65 |
| 0   | 5  | 3  | 86.94 | 4.76 |

## CIF S3

|    |    |    |       |      |
|----|----|----|-------|------|
| 1  | -5 | 3  | 21.99 | 1.74 |
| 1  | 5  | -3 | 20.74 | 1.60 |
| 1  | 5  | -3 | 20.18 | 1.50 |
| 1  | 5  | -3 | 18.00 | 1.61 |
| -1 | -5 | -3 | 20.88 | 1.73 |
| -1 | 5  | 3  | 19.94 | 1.76 |
| 1  | 5  | -3 | 21.48 | 1.27 |
| -1 | -5 | -3 | 20.18 | 1.88 |
| 1  | 5  | -3 | 19.62 | 1.23 |
| -1 | 5  | 3  | 22.39 | 1.89 |
| 1  | -5 | 3  | 22.00 | 1.89 |
| -1 | 5  | -3 | 19.04 | 1.29 |
| -1 | -5 | 3  | 20.29 | 1.70 |
| -1 | 5  | -3 | 17.84 | 1.63 |
| 1  | 5  | 3  | 19.51 | 1.27 |
| 1  | 5  | 3  | 20.91 | 1.87 |
| -1 | -5 | 3  | 21.14 | 1.31 |
| -1 | 5  | -3 | 19.94 | 1.67 |
| -1 | 5  | -3 | 19.57 | 1.40 |
| -1 | 5  | -3 | 22.59 | 1.80 |
| 1  | -5 | -3 | 20.23 | 1.80 |
| -1 | -5 | 3  | 19.06 | 1.55 |
| 1  | 5  | 3  | 17.79 | 1.62 |
| 1  | -5 | -3 | 22.23 | 1.43 |
| 1  | -5 | -3 | 22.96 | 1.48 |
| 1  | -5 | -3 | 18.56 | 1.64 |
| -2 | 5  | 3  | 4.89  | 1.20 |
| -2 | -5 | -3 | 4.41  | 1.49 |
| -2 | -5 | -3 | 3.87  | 0.57 |
| -2 | -5 | -3 | 5.29  | 0.88 |
| -2 | -5 | -3 | 5.28  | 1.52 |
| 2  | 5  | -3 | 5.34  | 0.60 |
| -2 | 5  | 3  | 4.47  | 0.60 |
| 2  | 5  | -3 | 5.31  | 0.92 |
| 2  | -5 | 3  | 5.23  | 1.29 |
| 2  | -5 | 3  | 5.19  | 0.81 |
| 2  | 5  | -3 | 5.30  | 0.90 |
| -2 | -5 | 3  | 5.07  | 1.31 |
| -2 | 5  | -3 | 6.10  | 1.26 |
| 2  | 5  | 3  | 4.97  | 0.64 |
| 2  | -5 | -3 | 4.27  | 0.85 |

## CIF S3

|    |    |    |       |      |
|----|----|----|-------|------|
| -2 | -5 | 3  | 5.96  | 0.70 |
| 2  | -5 | -3 | 5.08  | 1.21 |
| 2  | -5 | -3 | 3.91  | 0.94 |
| -2 | 5  | -3 | 4.85  | 0.67 |
| 2  | 5  | 3  | 5.20  | 1.35 |
| 2  | 5  | 3  | 4.78  | 1.10 |
| -2 | -5 | 3  | 4.34  | 0.47 |
| -2 | 5  | -3 | 3.97  | 0.72 |
| -2 | -5 | 3  | 3.62  | 0.94 |
| -2 | 5  | -3 | 4.90  | 1.17 |
| 3  | 5  | -3 | 22.13 | 1.64 |
| 3  | -5 | 3  | 20.44 | 2.05 |
| -3 | -5 | -3 | 22.95 | 2.06 |
| 3  | -5 | 3  | 23.15 | 1.44 |
| 3  | 5  | -3 | 24.58 | 1.34 |
| -3 | -5 | -3 | 23.06 | 1.46 |
| 3  | -5 | 3  | 22.67 | 1.51 |
| -3 | 5  | 3  | 25.16 | 1.37 |
| -3 | -5 | -3 | 23.97 | 1.34 |
| -3 | 5  | -3 | 22.53 | 1.45 |
| -3 | -5 | 3  | 24.33 | 1.36 |
| 3  | 5  | 3  | 23.05 | 2.01 |
| 3  | 5  | 3  | 21.93 | 1.85 |
| 3  | -5 | -3 | 25.51 | 1.61 |
| -3 | -5 | 3  | 23.83 | 1.24 |
| -3 | 5  | -3 | 24.86 | 1.40 |
| -3 | -5 | 3  | 26.03 | 1.59 |
| 3  | -5 | -3 | 22.61 | 2.00 |
| -3 | 5  | -3 | 24.22 | 1.53 |
| 3  | -5 | -3 | 23.55 | 1.68 |
| 3  | 5  | 3  | 24.77 | 1.46 |
| -3 | -5 | 3  | 23.75 | 2.09 |
| -4 | 5  | 3  | 10.82 | 0.87 |
| -4 | -5 | -3 | 9.47  | 1.03 |
| -4 | -5 | -3 | 10.34 | 0.87 |
| -4 | 5  | 3  | 9.11  | 0.81 |
| 4  | -5 | 3  | 9.88  | 1.00 |
| 4  | -5 | 3  | 8.73  | 1.70 |
| -4 | -5 | -3 | 10.58 | 0.79 |
| -4 | -5 | -3 | 7.91  | 1.72 |
| -4 | 5  | 3  | 10.11 | 0.88 |



## CIF S3

|    |    |    |       |      |
|----|----|----|-------|------|
| -4 | 5  | -3 | 11.35 | 0.99 |
| -4 | -5 | 3  | 9.97  | 0.74 |
| -4 | -5 | 3  | 11.38 | 0.61 |
| -4 | -5 | 3  | 11.00 | 0.71 |
| -4 | 5  | -3 | 10.91 | 1.16 |
| -4 | -5 | 3  | 11.05 | 0.59 |
| 4  | -5 | -3 | 10.71 | 1.01 |
| 4  | 5  | 3  | 10.57 | 0.92 |
| 4  | -5 | -3 | 10.95 | 1.53 |
| 4  | -5 | -3 | 10.65 | 1.13 |
| -4 | 5  | -3 | 11.39 | 0.94 |
| -5 | 5  | 3  | 10.22 | 0.85 |
| 5  | -5 | 3  | 10.99 | 1.07 |
| -5 | 5  | 3  | 9.73  | 1.20 |
| -5 | -5 | -3 | 11.46 | 0.87 |
| -5 | -5 | -3 | 11.07 | 0.82 |
| -5 | -5 | -3 | 12.38 | 1.35 |
| -5 | -5 | -3 | 10.70 | 1.06 |
| -5 | -5 | -3 | 9.85  | 1.07 |
| 5  | -5 | -3 | 9.51  | 1.19 |
| -5 | -5 | 3  | 10.09 | 0.70 |
| 5  | -5 | -3 | 11.00 | 1.10 |
| 5  | 5  | 3  | 10.91 | 0.97 |
| -5 | 5  | -3 | 11.69 | 0.97 |
| -5 | -5 | 3  | 10.89 | 1.10 |
| -5 | 5  | -3 | 10.44 | 0.99 |
| -6 | -5 | -3 | 8.35  | 0.73 |
| -6 | 5  | 3  | 7.70  | 1.19 |
| 6  | -5 | 3  | 8.00  | 0.99 |
| -6 | -5 | -3 | 7.85  | 1.36 |
| -6 | -5 | -3 | 7.72  | 0.72 |
| -6 | -5 | -3 | 7.85  | 0.97 |
| -6 | 5  | 3  | 8.61  | 0.77 |
| -6 | -5 | -3 | 7.76  | 0.84 |
| -6 | -5 | -3 | 9.87  | 0.78 |
| -6 | -5 | -3 | 8.90  | 1.11 |
| -6 | 5  | 3  | 8.60  | 0.89 |
| -6 | 5  | -3 | 8.53  | 0.94 |
| -6 | 5  | -3 | 7.85  | 1.28 |
| -6 | 5  | -3 | 7.36  | 0.86 |
| 6  | 5  | 3  | 8.31  | 0.98 |

## CIF S3

|    |    |    |       |      |
|----|----|----|-------|------|
| 6  | -5 | -3 | 7.90  | 1.06 |
| -6 | 5  | -3 | 7.66  | 0.96 |
| -6 | -5 | 3  | 9.02  | 0.61 |
| -6 | -5 | 3  | 6.29  | 0.95 |
| 6  | -5 | -3 | 5.87  | 1.18 |
| -6 | -5 | 3  | 8.67  | 0.64 |
| -7 | -5 | -3 | 19.65 | 1.25 |
| -7 | 5  | 3  | 20.31 | 1.31 |
| -7 | -5 | -3 | 18.53 | 1.10 |
| -7 | -5 | -3 | 18.09 | 1.44 |
| -7 | -5 | 3  | 19.47 | 1.07 |
| 7  | 5  | 3  | 16.48 | 1.88 |
| -7 | 5  | -3 | 18.37 | 1.31 |
| 7  | -5 | -3 | 17.23 | 2.03 |
| -7 | -5 | 3  | 19.50 | 1.42 |
| -7 | 5  | -3 | 19.87 | 1.37 |
| -8 | 5  | 3  | 3.49  | 0.66 |
| -8 | 5  | 3  | 1.87  | 0.46 |
| -8 | -5 | -3 | 1.18  | 0.50 |
| -8 | -5 | -3 | 3.27  | 0.61 |
| -8 | 5  | 3  | 1.10  | 0.50 |
| -8 | -5 | -3 | 1.45  | 0.42 |
| -8 | -5 | -3 | 1.83  | 0.42 |
| -8 | 5  | 3  | 2.45  | 0.50 |
| -8 | 5  | 3  | 1.95  | 0.51 |
| -8 | 5  | -3 | 3.42  | 0.84 |
| -8 | -5 | 3  | 2.36  | 0.29 |
| -8 | -5 | 3  | 2.41  | 0.29 |
| -8 | 5  | -3 | 2.65  | 0.75 |
| -8 | 5  | -3 | 2.61  | 0.60 |
| -8 | 5  | -3 | 2.54  | 0.56 |
| -8 | 5  | -3 | 1.56  | 0.54 |
| -8 | -5 | 3  | 1.96  | 0.25 |
| -8 | 5  | -3 | 3.19  | 0.82 |
| -8 | 5  | -3 | 1.50  | 0.73 |
| -8 | 5  | -3 | 1.82  | 0.89 |
| -9 | -5 | -3 | 1.54  | 0.37 |
| -9 | -5 | -3 | 0.95  | 0.31 |
| -9 | 5  | 3  | 0.99  | 0.40 |
| -9 | 5  | 3  | 1.62  | 0.49 |
| -9 | 5  | 3  | 2.07  | 0.44 |

## CIF S3

|     |    |    |       |      |
|-----|----|----|-------|------|
| -9  | 5  | 3  | 1.66  | 0.37 |
| -9  | 5  | -3 | 2.04  | 0.45 |
| -9  | 5  | -3 | 1.39  | 0.46 |
| -9  | 5  | -3 | 2.06  | 0.50 |
| -9  | 5  | -3 | 1.49  | 0.49 |
| -9  | 5  | -3 | 1.62  | 0.46 |
| -10 | 5  | 3  | 0.86  | 0.24 |
| -10 | 5  | 3  | 0.92  | 0.37 |
| -10 | -5 | -3 | 1.06  | 0.27 |
| -10 | -5 | -3 | 1.67  | 0.40 |
| -10 | 5  | 3  | 0.61  | 0.22 |
| -10 | 5  | -3 | 1.22  | 0.29 |
| -10 | 5  | -3 | 0.79  | 0.21 |
| -10 | 5  | -3 | 1.08  | 0.34 |
| -10 | 5  | -3 | 0.68  | 0.33 |
| -10 | 5  | -3 | 0.89  | 0.37 |
| 0   | 6  | -3 | 14.46 | 1.10 |
| 0   | -6 | 3  | 11.96 | 1.77 |
| 0   | 6  | -3 | 14.52 | 1.46 |
| 0   | -6 | 3  | 14.62 | 1.60 |
| 0   | 6  | 3  | 13.03 | 0.93 |
| 0   | -6 | 3  | 13.05 | 0.95 |
| 0   | 6  | -3 | 11.98 | 1.37 |
| 0   | -6 | -3 | 13.43 | 1.71 |
| 0   | 6  | 3  | 10.93 | 1.62 |
| 0   | 6  | 3  | 13.14 | 0.98 |
| 0   | 6  | -3 | 14.50 | 1.05 |
| 0   | 6  | 3  | 12.96 | 1.55 |
| 0   | -6 | -3 | 14.46 | 1.58 |
| 0   | 6  | -3 | 15.05 | 1.65 |
| 1   | 6  | -3 | 11.13 | 0.97 |
| -1  | 6  | 3  | 9.36  | 1.31 |
| -1  | 6  | 3  | 12.02 | 1.63 |
| 1   | -6 | 3  | 11.91 | 1.75 |
| 1   | -6 | 3  | 11.02 | 1.44 |
| 1   | 6  | -3 | 11.29 | 0.93 |
| 1   | -6 | 3  | 9.71  | 0.90 |
| -1  | 6  | 3  | 10.54 | 0.86 |
| -1  | -6 | -3 | 11.48 | 1.43 |
| -1  | -6 | -3 | 10.50 | 0.94 |
| 1   | 6  | -3 | 12.24 | 1.27 |

## CIF S3

|    |    |    |       |      |
|----|----|----|-------|------|
| 1  | 6  | -3 | 10.68 | 1.51 |
| 1  | 6  | -3 | 11.77 | 1.28 |
| -1 | -6 | -3 | 11.03 | 1.50 |
| -1 | 6  | -3 | 10.57 | 0.97 |
| -1 | -6 | 3  | 9.94  | 0.85 |
| 1  | 6  | 3  | 9.01  | 1.55 |
| 1  | -6 | -3 | 11.43 | 1.49 |
| -1 | -6 | 3  | 10.72 | 1.45 |
| -1 | 6  | -3 | 11.65 | 0.88 |
| -1 | 6  | -3 | 10.95 | 1.39 |
| -1 | 6  | -3 | 9.51  | 1.50 |
| 1  | -6 | -3 | 12.77 | 1.22 |
| 1  | 6  | 3  | 11.20 | 0.98 |
| 1  | -6 | -3 | 10.71 | 1.53 |
| -1 | 6  | -3 | 10.78 | 1.03 |
| 1  | 6  | 3  | 12.39 | 1.41 |
| 2  | 6  | -3 | 4.13  | 0.72 |
| 2  | 6  | -3 | 4.10  | 0.68 |
| 2  | -6 | 3  | 5.34  | 1.63 |
| -2 | 6  | 3  | 3.20  | 0.69 |
| 2  | -6 | 3  | 3.95  | 1.30 |
| 2  | -6 | 3  | 4.33  | 0.76 |
| -2 | 6  | 3  | 4.46  | 1.27 |
| -2 | -6 | -3 | 3.96  | 1.40 |
| -2 | -6 | -3 | 4.31  | 0.59 |
| 2  | 6  | -3 | 3.14  | 0.96 |
| 2  | -6 | -3 | 3.81  | 0.89 |
| -2 | -6 | 3  | 3.63  | 0.76 |
| -2 | -6 | 3  | 3.34  | 0.48 |
| 2  | -6 | -3 | 4.39  | 1.33 |
| 2  | -6 | -3 | 3.49  | 1.07 |
| 2  | 6  | 3  | 4.50  | 1.41 |
| -2 | 6  | -3 | 3.48  | 1.31 |
| -2 | 6  | -3 | 4.20  | 0.75 |
| -2 | 6  | -3 | 3.61  | 1.04 |
| 2  | 6  | 3  | 5.03  | 0.67 |
| -2 | -6 | 3  | 5.74  | 1.26 |
| -2 | 6  | -3 | 4.24  | 0.69 |
| 3  | -6 | 3  | 26.07 | 1.56 |
| -3 | 6  | 3  | 25.38 | 1.57 |
| -3 | -6 | -3 | 25.55 | 1.41 |

## CIF S3

|    |    |    |       |      |
|----|----|----|-------|------|
| 3  | -6 | 3  | 23.96 | 2.21 |
| -3 | 6  | 3  | 25.55 | 1.45 |
| -3 | -6 | -3 | 25.37 | 1.50 |
| -3 | -6 | -3 | 23.59 | 2.20 |
| 3  | 6  | -3 | 26.78 | 1.49 |
| 3  | -6 | -3 | 23.42 | 2.15 |
| 3  | -6 | -3 | 21.00 | 1.63 |
| -3 | -6 | 3  | 27.02 | 1.77 |
| -3 | -6 | 3  | 24.59 | 2.09 |
| -3 | -6 | 3  | 27.76 | 1.53 |
| -3 | -6 | 3  | 27.04 | 1.41 |
| 3  | 6  | 3  | 24.76 | 1.56 |
| 3  | -6 | -3 | 21.54 | 1.71 |
| -3 | 6  | -3 | 26.08 | 1.69 |
| -3 | 6  | -3 | 28.15 | 1.53 |
| -3 | 6  | -3 | 26.31 | 1.61 |
| -3 | -6 | 3  | 25.28 | 1.36 |
| 3  | 6  | 3  | 24.94 | 2.28 |
| -4 | 6  | 3  | 0.83  | 0.54 |
| -4 | -6 | -3 | 0.49  | 0.69 |
| -4 | -6 | -3 | 0.85  | 0.45 |
| -4 | 6  | 3  | 0.50  | 0.52 |
| 4  | 6  | -3 | 0.31  | 0.47 |
| -4 | 6  | 3  | 0.94  | 0.55 |
| 4  | -6 | 3  | 0.00  | 0.74 |
| -4 | -6 | -3 | 0.97  | 0.52 |
| -4 | 6  | -3 | 0.71  | 0.66 |
| -4 | -6 | 3  | 0.49  | 0.26 |
| 4  | -6 | -3 | -3.69 | 2.00 |
| -4 | -6 | 3  | 1.18  | 0.43 |
| 4  | -6 | -3 | -0.34 | 0.85 |
| -4 | 6  | -3 | 0.40  | 0.55 |
| -4 | -6 | 3  | 0.68  | 0.44 |
| -4 | -6 | 3  | -0.01 | 0.67 |
| 4  | 6  | 3  | 0.84  | 0.65 |
| -4 | 6  | -3 | 0.45  | 0.60 |
| -4 | -6 | 3  | 0.79  | 0.26 |
| 4  | -6 | -3 | 0.90  | 0.97 |
| -5 | -6 | -3 | 3.81  | 0.84 |
| -5 | -6 | -3 | 3.74  | 0.73 |
| -5 | 6  | 3  | 4.59  | 0.78 |

## CIF S3

|    |    |    |      |      |
|----|----|----|------|------|
| -5 | -6 | -3 | 2.35 | 0.79 |
| 5  | -6 | 3  | 4.09 | 1.00 |
| -5 | -6 | -3 | 4.05 | 0.62 |
| -5 | 6  | 3  | 3.42 | 0.69 |
| -5 | -6 | -3 | 4.38 | 0.76 |
| -5 | -6 | -3 | 4.71 | 1.10 |
| -5 | 6  | -3 | 3.92 | 0.78 |
| 5  | 6  | 3  | 3.80 | 0.80 |
| -5 | 6  | -3 | 3.15 | 0.91 |
| 5  | -6 | -3 | 2.63 | 1.10 |
| 5  | -6 | -3 | 1.85 | 0.93 |
| -5 | 6  | -3 | 3.42 | 0.76 |
| -5 | -6 | 3  | 3.99 | 0.72 |
| -6 | -6 | -3 | 5.10 | 0.67 |
| -6 | 6  | 3  | 6.55 | 1.26 |
| -6 | -6 | -3 | 5.07 | 0.94 |
| -6 | -6 | -3 | 6.79 | 0.69 |
| -6 | -6 | -3 | 4.37 | 1.02 |
| -6 | -6 | -3 | 6.07 | 1.08 |
| -6 | -6 | -3 | 4.89 | 0.76 |
| -6 | -6 | -3 | 7.90 | 0.88 |
| -6 | 6  | 3  | 6.55 | 0.77 |
| 6  | -6 | 3  | 5.36 | 1.07 |
| -6 | 6  | 3  | 6.33 | 0.93 |
| -6 | 6  | -3 | 5.32 | 0.96 |
| -6 | -6 | 3  | 5.41 | 0.58 |
| -6 | 6  | -3 | 5.03 | 0.90 |
| -6 | 6  | -3 | 6.18 | 1.30 |
| 6  | -6 | -3 | 5.56 | 1.21 |
| 6  | -6 | -3 | 4.82 | 1.08 |
| -6 | -6 | 3  | 6.25 | 0.60 |
| -6 | -6 | 3  | 5.98 | 0.95 |
| -6 | -6 | 3  | 5.12 | 0.98 |
| 6  | 6  | 3  | 5.87 | 0.94 |
| -7 | 6  | 3  | 3.85 | 0.89 |
| -7 | -6 | -3 | 4.16 | 0.78 |
| -7 | 6  | 3  | 5.34 | 0.78 |
| -7 | -6 | -3 | 3.57 | 0.72 |
| -7 | 6  | 3  | 3.32 | 0.72 |
| -7 | 6  | 3  | 3.84 | 0.76 |
| -7 | -6 | -3 | 3.48 | 1.06 |

## CIF S3

|    |    |    |      |      |
|----|----|----|------|------|
| -7 | 6  | 3  | 4.21 | 0.93 |
| -7 | 6  | 3  | 4.14 | 0.79 |
| -7 | -6 | -3 | 3.64 | 0.68 |
| -7 | -6 | -3 | 3.50 | 1.05 |
| -7 | -6 | -3 | 2.92 | 0.66 |
| -7 | -6 | -3 | 4.84 | 1.09 |
| -7 | 6  | 3  | 4.77 | 0.77 |
| -7 | 6  | -3 | 4.10 | 0.88 |
| -7 | -6 | 3  | 4.31 | 0.43 |
| -7 | -6 | 3  | 4.54 | 0.52 |
| -7 | 6  | -3 | 5.26 | 0.96 |
| -7 | 6  | -3 | 3.21 | 0.78 |
| -7 | 6  | -3 | 3.73 | 0.88 |
| -7 | 6  | -3 | 5.10 | 1.27 |
| -7 | 6  | -3 | 3.64 | 0.98 |
| -7 | -6 | 3  | 4.20 | 0.79 |
| -7 | -6 | 3  | 3.49 | 0.46 |
| -8 | -6 | -3 | 3.40 | 0.58 |
| -8 | -6 | -3 | 4.57 | 0.68 |
| -8 | 6  | 3  | 1.74 | 0.64 |
| -8 | 6  | 3  | 2.90 | 0.81 |
| -8 | 6  | 3  | 2.94 | 0.72 |
| -8 | 6  | 3  | 4.23 | 0.70 |
| -8 | 6  | 3  | 2.63 | 0.73 |
| -8 | -6 | -3 | 3.23 | 0.63 |
| -8 | 6  | -3 | 3.65 | 0.78 |
| -8 | 6  | -3 | 3.62 | 0.57 |
| -8 | 6  | -3 | 2.72 | 0.78 |
| -8 | -6 | 3  | 3.22 | 0.31 |
| -8 | 6  | -3 | 4.17 | 0.84 |
| -8 | 6  | -3 | 3.37 | 0.84 |
| -8 | -6 | 3  | 3.07 | 0.24 |
| -8 | -6 | 3  | 3.18 | 0.32 |
| -8 | 6  | -3 | 2.79 | 0.87 |
| -8 | 6  | -3 | 2.60 | 0.60 |
| -9 | 6  | 3  | 0.86 | 0.46 |
| -9 | 6  | 3  | 0.49 | 0.32 |
| -9 | 6  | 3  | 0.20 | 0.39 |
| -9 | 6  | 3  | 0.45 | 0.36 |
| -9 | 6  | 3  | 0.61 | 0.35 |
| -9 | 6  | -3 | 0.21 | 0.39 |

## CIF S3

|     |    |    |       |      |
|-----|----|----|-------|------|
| -9  | 6  | -3 | 0.38  | 0.43 |
| -9  | 6  | -3 | 0.02  | 0.40 |
| -9  | 6  | -3 | 0.56  | 0.44 |
| -9  | 6  | -3 | 0.47  | 0.46 |
| -10 | -6 | -3 | 4.57  | 0.29 |
| -10 | 6  | 3  | 3.67  | 0.42 |
| -10 | -6 | -3 | 4.72  | 0.29 |
| -10 | 6  | 3  | 4.89  | 0.49 |
| 10  | -6 | 3  | 5.64  | 0.73 |
| -10 | 6  | 3  | 4.56  | 0.36 |
| -10 | 6  | -3 | 4.80  | 0.41 |
| -10 | 6  | -3 | 4.87  | 0.52 |
| -10 | 6  | -3 | 4.59  | 0.46 |
| 0   | 7  | -3 | 0.10  | 0.63 |
| 0   | -7 | 3  | -0.58 | 0.86 |
| 0   | 7  | -3 | -0.40 | 0.93 |
| 0   | 7  | -3 | 0.55  | 0.65 |
| 0   | -7 | -3 | 0.91  | 0.94 |
| 0   | 7  | 3  | -0.45 | 0.48 |
| 0   | 7  | 3  | -0.47 | 0.94 |
| 0   | -7 | 3  | -0.40 | 0.50 |
| 0   | -7 | -3 | -0.25 | 0.99 |
| 1   | 7  | -3 | 16.62 | 1.71 |
| -1  | 7  | 3  | 14.39 | 1.01 |
| 1   | 7  | -3 | 16.35 | 1.10 |
| 1   | -7 | 3  | 14.15 | 1.98 |
| -1  | -7 | -3 | 14.25 | 1.66 |
| 1   | -7 | 3  | 12.19 | 1.60 |
| 1   | -7 | 3  | 14.30 | 1.13 |
| 1   | 7  | -3 | 16.37 | 1.19 |
| -1  | -7 | -3 | 14.78 | 1.83 |
| -1  | 7  | 3  | 9.91  | 1.68 |
| 1   | -7 | -3 | 10.56 | 1.69 |
| 1   | 7  | 3  | 14.31 | 1.08 |
| -1  | -7 | 3  | 13.31 | 1.00 |
| 1   | 7  | 3  | 9.97  | 1.69 |
| -1  | -7 | 3  | 14.16 | 1.07 |
| -1  | 7  | -3 | 16.44 | 1.83 |
| 1   | 7  | 3  | 12.94 | 1.07 |
| -1  | 7  | -3 | 14.09 | 1.14 |
| -1  | -7 | 3  | 12.13 | 1.67 |



## CIF S3

|    |    |    |       |      |
|----|----|----|-------|------|
| -1 | 7  | -3 | 14.18 | 1.04 |
| -2 | -7 | -3 | 2.40  | 0.57 |
| 2  | 7  | -3 | 1.97  | 0.63 |
| 2  | -7 | 3  | 2.80  | 1.26 |
| -2 | 7  | 3  | 0.86  | 0.53 |
| -2 | -7 | -3 | 0.94  | 1.03 |
| 2  | -7 | 3  | 1.41  | 0.64 |
| 2  | 7  | -3 | 1.56  | 0.67 |
| 2  | -7 | 3  | -0.98 | 1.01 |
| -2 | 7  | 3  | 0.06  | 0.99 |
| -2 | -7 | 3  | 0.86  | 0.56 |
| -2 | 7  | -3 | 1.08  | 1.00 |
| 2  | 7  | 3  | 1.56  | 0.63 |
| -2 | 7  | -3 | 1.74  | 0.60 |
| -2 | 7  | -3 | 1.52  | 0.57 |
| -2 | -7 | 3  | -0.77 | 0.95 |
| 2  | 7  | 3  | 0.80  | 1.05 |
| 2  | -7 | -3 | 1.20  | 1.10 |
| 2  | -7 | -3 | 0.80  | 0.67 |
| 2  | -7 | -3 | 1.00  | 0.96 |
| -2 | -7 | 3  | 1.63  | 0.69 |
| -3 | -7 | -3 | 4.88  | 0.91 |
| -3 | 7  | 3  | 6.20  | 0.81 |
| 3  | 7  | -3 | 5.77  | 0.86 |
| 3  | -7 | 3  | 5.01  | 0.89 |
| -3 | -7 | -3 | 5.22  | 0.64 |
| 3  | 7  | -3 | 5.99  | 0.79 |
| 3  | -7 | 3  | 5.13  | 2.26 |
| -3 | -7 | -3 | 4.84  | 0.75 |
| -3 | 7  | -3 | 5.96  | 0.83 |
| -3 | -7 | 3  | 5.48  | 0.69 |
| -3 | 7  | -3 | 5.12  | 0.89 |
| -3 | -7 | 3  | 6.05  | 0.88 |
| -3 | -7 | 3  | 6.33  | 0.59 |
| -3 | 7  | -3 | 6.11  | 0.87 |
| 3  | 7  | 3  | 5.27  | 0.84 |
| 3  | -7 | -3 | 5.70  | 0.99 |
| -3 | -7 | 3  | 6.23  | 0.84 |
| -3 | 7  | -3 | 7.44  | 2.28 |
| 3  | -7 | -3 | 2.67  | 1.02 |
| -3 | -7 | 3  | 4.73  | 1.53 |

## CIF S3

|    |    |    |      |      |
|----|----|----|------|------|
| -4 | 7  | 3  | 7.75 | 0.99 |
| 4  | 7  | -3 | 5.23 | 0.79 |
| -4 | -7 | -3 | 3.60 | 0.99 |
| -4 | -7 | -3 | 6.35 | 0.89 |
| -4 | 7  | 3  | 5.80 | 0.82 |
| -4 | -7 | -3 | 6.22 | 0.72 |
| -4 | -7 | -3 | 5.63 | 0.99 |
| -4 | 7  | 3  | 6.34 | 0.84 |
| -4 | -7 | -3 | 5.07 | 1.09 |
| -4 | 7  | -3 | 7.49 | 0.97 |
| 4  | 7  | 3  | 5.52 | 0.86 |
| 4  | -7 | -3 | 4.52 | 1.21 |
| -4 | -7 | 3  | 5.95 | 0.53 |
| -4 | -7 | 3  | 6.40 | 0.69 |
| -4 | 7  | -3 | 5.92 | 0.93 |
| -4 | -7 | 3  | 3.56 | 0.90 |
| -4 | -7 | 3  | 6.71 | 0.74 |
| -4 | -7 | 3  | 5.94 | 0.93 |
| -4 | 7  | -3 | 6.75 | 1.16 |
| 4  | -7 | -3 | 5.55 | 1.15 |
| -5 | 7  | 3  | 6.87 | 1.00 |
| -5 | -7 | -3 | 7.50 | 0.78 |
| -5 | -7 | -3 | 7.98 | 1.21 |
| -5 | -7 | -3 | 7.37 | 1.22 |
| -5 | 7  | 3  | 7.33 | 0.88 |
| -5 | -7 | -3 | 5.11 | 1.05 |
| -5 | -7 | -3 | 5.80 | 0.89 |
| 5  | -7 | 3  | 5.13 | 1.14 |
| -5 | -7 | -3 | 7.38 | 0.78 |
| 5  | 7  | 3  | 5.31 | 0.96 |
| -5 | -7 | 3  | 6.50 | 1.10 |
| 5  | -7 | -3 | 4.39 | 1.31 |
| -5 | 7  | -3 | 6.37 | 0.88 |
| -5 | -7 | 3  | 5.75 | 0.44 |
| -5 | 7  | -3 | 6.59 | 1.01 |
| -5 | 7  | -3 | 7.75 | 1.01 |
| -5 | -7 | 3  | 6.20 | 1.05 |
| -5 | -7 | 3  | 7.07 | 0.97 |
| 5  | -7 | -3 | 6.61 | 1.20 |
| -6 | 7  | 3  | 5.25 | 0.94 |
| -6 | -7 | -3 | 3.88 | 0.74 |

## CIF S3

|    |    |    |      |      |
|----|----|----|------|------|
| -6 | -7 | -3 | 2.87 | 0.99 |
| -6 | -7 | -3 | 3.66 | 1.10 |
| -6 | -7 | -3 | 3.61 | 0.63 |
| -6 | -7 | -3 | 1.82 | 0.94 |
| -6 | 7  | 3  | 4.83 | 0.79 |
| 6  | -7 | 3  | 2.57 | 0.94 |
| -6 | -7 | -3 | 5.59 | 0.90 |
| -6 | -7 | -3 | 3.10 | 0.62 |
| -6 | -7 | 3  | 5.16 | 1.00 |
| -6 | -7 | 3  | 4.92 | 0.62 |
| -6 | 7  | -3 | 3.56 | 0.97 |
| -6 | 7  | -3 | 3.66 | 0.91 |
| -6 | 7  | -3 | 4.49 | 1.20 |
| -6 | -7 | 3  | 4.88 | 1.10 |
| -6 | -7 | 3  | 4.98 | 0.59 |
| 6  | 7  | 3  | 3.08 | 0.85 |
| 6  | -7 | -3 | 5.69 | 1.37 |
| -7 | -7 | -3 | 9.30 | 0.87 |
| -7 | 7  | 3  | 8.68 | 1.02 |
| -7 | -7 | -3 | 7.84 | 0.84 |
| -7 | -7 | -3 | 7.32 | 1.11 |
| -7 | 7  | 3  | 8.16 | 0.91 |
| -7 | 7  | 3  | 8.50 | 0.96 |
| -7 | 7  | 3  | 8.85 | 0.96 |
| -7 | -7 | -3 | 7.89 | 1.36 |
| -7 | 7  | 3  | 5.72 | 1.39 |
| -7 | 7  | 3  | 7.61 | 0.93 |
| -7 | 7  | 3  | 8.37 | 0.94 |
| -7 | -7 | -3 | 7.44 | 1.32 |
| -7 | 7  | 3  | 9.93 | 1.03 |
| -7 | 7  | -3 | 8.77 | 1.02 |
| -7 | -7 | 3  | 9.05 | 0.62 |
| -7 | 7  | -3 | 8.41 | 0.99 |
| -7 | 7  | -3 | 7.75 | 1.41 |
| -7 | -7 | 3  | 9.82 | 1.10 |
| -7 | -7 | 3  | 8.82 | 0.61 |
| -7 | 7  | -3 | 9.16 | 1.06 |
| -8 | 7  | 3  | 4.22 | 0.75 |
| -8 | -7 | -3 | 5.09 | 0.69 |
| -8 | 7  | 3  | 4.60 | 0.78 |
| -8 | 7  | 3  | 4.88 | 0.82 |

## CIF S3

|    |    |    |       |      |
|----|----|----|-------|------|
| -8 | -7 | -3 | 4.50  | 0.58 |
| -8 | -7 | 3  | 5.13  | 0.37 |
| -8 | -7 | 3  | 5.33  | 0.38 |
| -8 | 7  | -3 | 5.05  | 0.80 |
| -8 | 7  | -3 | 4.92  | 0.89 |
| -8 | 7  | -3 | 4.39  | 0.79 |
| -8 | 7  | -3 | 4.91  | 0.76 |
| -8 | 7  | -3 | 5.75  | 0.85 |
| -8 | -7 | 3  | 6.40  | 1.26 |
| -8 | 7  | -3 | 3.40  | 0.88 |
| -9 | 7  | 3  | 7.01  | 0.59 |
| -9 | 7  | 3  | 7.73  | 0.59 |
| -9 | 7  | 3  | 7.52  | 0.74 |
| -9 | -7 | -3 | 6.48  | 0.54 |
| -9 | 7  | 3  | 5.72  | 0.66 |
| 9  | -7 | 3  | 7.02  | 0.94 |
| -9 | 7  | -3 | 7.55  | 0.70 |
| -9 | 7  | -3 | 7.24  | 0.63 |
| -9 | 7  | -3 | 5.97  | 0.74 |
| -9 | 7  | -3 | 6.64  | 0.70 |
| 0  | 8  | -3 | 1.04  | 0.74 |
| 0  | 8  | -3 | 0.31  | 0.78 |
| 0  | 8  | 3  | 0.52  | 0.55 |
| 0  | -8 | 3  | 1.12  | 0.59 |
| 0  | 8  | -3 | 0.88  | 1.36 |
| 0  | -8 | -3 | 0.21  | 1.07 |
| 0  | -8 | 3  | 0.64  | 0.59 |
| 0  | -8 | -3 | 1.16  | 0.96 |
| 1  | -8 | 3  | 18.51 | 1.28 |
| 1  | 8  | -3 | 19.70 | 1.44 |
| 1  | -8 | 3  | 20.49 | 1.32 |
| 1  | 8  | -3 | 18.81 | 1.49 |
| -1 | 8  | 3  | 20.96 | 1.29 |
| 1  | 8  | -3 | 19.61 | 2.21 |
| -1 | 8  | -3 | 20.16 | 1.44 |
| -1 | -8 | 3  | 17.36 | 1.26 |
| -1 | -8 | 3  | 19.47 | 1.28 |
| -1 | 8  | -3 | 21.74 | 1.47 |
| 1  | 8  | 3  | 19.17 | 1.36 |
| 1  | -8 | -3 | 19.17 | 1.39 |
| -1 | -8 | 3  | 17.38 | 1.30 |

## CIF S3

|    |    |    |       |      |
|----|----|----|-------|------|
| 2  | -8 | 3  | 0.71  | 0.68 |
| -2 | -8 | -3 | 0.15  | 0.68 |
| 2  | 8  | -3 | -0.01 | 0.65 |
| 2  | 8  | -3 | 0.55  | 0.69 |
| -2 | -8 | -3 | 0.25  | 0.54 |
| -2 | 8  | 3  | 0.37  | 0.61 |
| -2 | -8 | 3  | 1.03  | 0.68 |
| -2 | 8  | -3 | 0.32  | 0.60 |
| -2 | -8 | 3  | 1.39  | 0.66 |
| 2  | -8 | -3 | 0.11  | 0.71 |
| -2 | -8 | 3  | 0.81  | 0.62 |
| 2  | 8  | 3  | 0.78  | 0.65 |
| -2 | 8  | -3 | 0.40  | 0.61 |
| 3  | -8 | 3  | 13.62 | 1.22 |
| -3 | 8  | 3  | 12.23 | 1.16 |
| -3 | -8 | -3 | 14.40 | 1.05 |
| -3 | -8 | -3 | 14.93 | 1.16 |
| 3  | 8  | -3 | 14.82 | 1.26 |
| -3 | -8 | -3 | 14.12 | 1.11 |
| 3  | 8  | -3 | 13.78 | 1.15 |
| -3 | -8 | -3 | 13.50 | 1.20 |
| -3 | -8 | -3 | 12.74 | 1.20 |
| 3  | -8 | -3 | 11.22 | 1.45 |
| -3 | -8 | 3  | 14.86 | 1.10 |
| 3  | 8  | 3  | 12.60 | 1.22 |
| -3 | -8 | 3  | 13.22 | 1.21 |
| -3 | -8 | 3  | 12.33 | 0.92 |
| -3 | 8  | -3 | 13.71 | 1.26 |
| -3 | 8  | -3 | 13.87 | 1.20 |
| -3 | -8 | 3  | 11.75 | 1.17 |
| -3 | -8 | 3  | 14.22 | 1.04 |
| -3 | 8  | -3 | 16.58 | 1.17 |
| -4 | -8 | -3 | 5.17  | 0.97 |
| -4 | -8 | -3 | 6.26  | 1.05 |
| 4  | -8 | 3  | 5.67  | 1.00 |
| -4 | -8 | -3 | 5.30  | 0.93 |
| -4 | -8 | -3 | 5.93  | 1.15 |
| -4 | -8 | -3 | 4.99  | 0.86 |
| -4 | 8  | 3  | 5.18  | 0.89 |
| -4 | -8 | -3 | 4.75  | 0.76 |
| 4  | 8  | -3 | 6.61  | 0.89 |

## CIF S3

|    |    |    |       |      |
|----|----|----|-------|------|
| -4 | 8  | 3  | 6.25  | 0.83 |
| -4 | 8  | -3 | 5.11  | 1.10 |
| 4  | -8 | -3 | 5.68  | 1.25 |
| -4 | -8 | 3  | 5.44  | 0.82 |
| -4 | -8 | 3  | 5.45  | 0.94 |
| -4 | 8  | -3 | 3.65  | 1.06 |
| -4 | -8 | 3  | 7.40  | 1.14 |
| -4 | -8 | 3  | 5.90  | 0.59 |
| -4 | -8 | 3  | 6.45  | 0.94 |
| -4 | 8  | -3 | 6.60  | 0.92 |
| 4  | 8  | 3  | 6.20  | 0.98 |
| -4 | -8 | 3  | 5.76  | 0.81 |
| -5 | -8 | -3 | 4.86  | 0.84 |
| -5 | 8  | 3  | 7.63  | 1.43 |
| -5 | -8 | -3 | 5.92  | 0.67 |
| -5 | -8 | -3 | 6.02  | 1.25 |
| -5 | -8 | -3 | 5.02  | 0.90 |
| -5 | -8 | -3 | 5.28  | 0.97 |
| -5 | -8 | -3 | 5.77  | 1.40 |
| -5 | -8 | -3 | 6.21  | 0.77 |
| -5 | 8  | 3  | 6.29  | 0.95 |
| -5 | -8 | 3  | 4.88  | 0.52 |
| -5 | -8 | 3  | 4.94  | 0.87 |
| -5 | -8 | 3  | 6.98  | 1.05 |
| -5 | 8  | -3 | 5.66  | 0.91 |
| -5 | 8  | -3 | 4.62  | 1.04 |
| -5 | -8 | 3  | 5.23  | 0.76 |
| -5 | -8 | 3  | 3.94  | 0.98 |
| -5 | 8  | -3 | 6.61  | 1.03 |
| 5  | -8 | -3 | 4.80  | 1.11 |
| -6 | -8 | -3 | 22.70 | 1.75 |
| -6 | 8  | 3  | 21.85 | 1.43 |
| -6 | -8 | -3 | 22.88 | 1.69 |
| -6 | 8  | 3  | 22.11 | 1.44 |
| -6 | -8 | -3 | 15.55 | 1.33 |
| -6 | -8 | -3 | 19.71 | 1.37 |
| -6 | 8  | 3  | 20.27 | 1.65 |
| 6  | -8 | 3  | 24.39 | 1.65 |
| -6 | 8  | 3  | 20.54 | 1.50 |
| -6 | -8 | -3 | 20.59 | 1.38 |
| -6 | 8  | 3  | 20.91 | 1.51 |

## CIF S3

|    |    |    |       |      |
|----|----|----|-------|------|
| -6 | 8  | 3  | 20.36 | 1.48 |
| -6 | 8  | 3  | 20.71 | 1.36 |
| -6 | -8 | -3 | 23.79 | 1.44 |
| -6 | 8  | 3  | 21.98 | 1.53 |
| -6 | -8 | 3  | 21.27 | 1.19 |
| -6 | -8 | 3  | 20.31 | 1.57 |
| -6 | 8  | -3 | 21.78 | 1.29 |
| -6 | 8  | -3 | 20.52 | 1.46 |
| -6 | -8 | 3  | 22.27 | 1.25 |
| -6 | 8  | -3 | 20.43 | 1.47 |
| -6 | 8  | -3 | 24.20 | 1.74 |
| -6 | -8 | 3  | 22.27 | 1.65 |
| -6 | -8 | 3  | 19.05 | 1.25 |
| -6 | 8  | -3 | 19.92 | 1.84 |
| -6 | 8  | -3 | 21.87 | 1.43 |
| -6 | 8  | -3 | 22.34 | 1.49 |
| -6 | -8 | 3  | 19.60 | 1.19 |
| -7 | 8  | 3  | 2.00  | 0.75 |
| -7 | 8  | 3  | 3.84  | 0.82 |
| 7  | -8 | 3  | 5.23  | 1.09 |
| -7 | 8  | 3  | 3.41  | 0.94 |
| -7 | -8 | -3 | 3.05  | 0.71 |
| -7 | 8  | 3  | 3.10  | 0.84 |
| -7 | -8 | -3 | 3.83  | 0.98 |
| -7 | 8  | 3  | 4.40  | 0.84 |
| -7 | -8 | -3 | 5.65  | 1.25 |
| -7 | -8 | -3 | 4.39  | 0.78 |
| -7 | 8  | 3  | 3.18  | 0.86 |
| -7 | 8  | 3  | 3.47  | 0.81 |
| -7 | -8 | -3 | 3.66  | 0.83 |
| -7 | 8  | 3  | 2.80  | 0.74 |
| -7 | -8 | 3  | 3.93  | 0.51 |
| -7 | 8  | -3 | 5.84  | 1.33 |
| -7 | 8  | -3 | 4.66  | 0.93 |
| -7 | -8 | 3  | 4.10  | 0.50 |
| -7 | -8 | 3  | 3.04  | 0.73 |
| -7 | -8 | 3  | 4.71  | 1.11 |
| -7 | 8  | -3 | 4.48  | 0.89 |
| -7 | 8  | -3 | 3.59  | 0.77 |
| -8 | 8  | 3  | 4.72  | 0.73 |
| -8 | 8  | 3  | 3.41  | 0.58 |

## CIF S3

|    |    |    |      |      |
|----|----|----|------|------|
| -8 | -8 | -3 | 2.23 | 0.76 |
| -8 | -8 | -3 | 4.78 | 0.68 |
| 8  | -8 | 3  | 4.28 | 0.96 |
| -8 | 8  | 3  | 4.44 | 0.74 |
| -8 | 8  | 3  | 4.99 | 0.75 |
| -8 | -8 | -3 | 3.67 | 0.55 |
| -8 | -8 | -3 | 4.45 | 0.57 |
| -8 | 8  | -3 | 4.00 | 0.71 |
| -8 | 8  | -3 | 4.34 | 0.73 |
| -8 | 8  | -3 | 3.40 | 0.73 |
| -8 | 8  | -3 | 5.13 | 0.84 |
| -8 | 8  | -3 | 4.64 | 0.77 |
| -8 | 8  | -3 | 3.33 | 0.80 |
| -8 | -8 | 3  | 3.47 | 0.25 |
| -8 | -8 | 3  | 3.64 | 0.72 |
| -8 | -8 | 3  | 3.61 | 0.26 |
| -9 | 8  | 3  | 7.03 | 0.62 |
| -9 | -8 | -3 | 7.00 | 0.49 |
| 9  | -8 | 3  | 8.02 | 0.81 |
| -9 | 8  | 3  | 6.56 | 0.53 |
| -9 | -8 | -3 | 7.72 | 0.50 |
| -9 | 8  | 3  | 7.15 | 0.63 |
| -9 | 8  | -3 | 6.64 | 0.64 |
| -9 | 8  | -3 | 7.16 | 0.68 |
| -9 | 8  | -3 | 6.93 | 0.63 |
| -9 | 8  | -3 | 6.50 | 0.58 |
| 0  | -9 | -3 | 0.38 | 0.79 |
| 0  | -9 | 3  | 0.18 | 0.66 |
| 0  | -9 | 3  | 1.14 | 0.72 |
| 0  | 9  | 3  | 0.98 | 0.71 |
| 0  | 9  | -3 | 1.36 | 0.92 |
| 1  | -9 | 3  | 3.49 | 0.85 |
| -1 | 9  | 3  | 2.69 | 0.80 |
| -1 | -9 | -3 | 2.35 | 0.78 |
| 1  | 9  | -3 | 1.79 | 0.88 |
| 1  | -9 | 3  | 3.85 | 0.85 |
| 1  | 9  | -3 | 3.11 | 0.95 |
| 1  | -9 | -3 | 4.22 | 0.96 |
| -1 | -9 | 3  | 3.52 | 0.83 |
| -1 | -9 | 3  | 3.30 | 0.72 |
| -1 | -9 | 3  | 3.01 | 0.72 |



## CIF S3

|    |    |    |       |      |
|----|----|----|-------|------|
| 1  | 9  | 3  | 1.69  | 1.23 |
| -1 | -9 | 3  | 3.49  | 0.80 |
| -2 | -9 | -3 | 6.22  | 0.93 |
| 2  | 9  | -3 | 6.49  | 1.04 |
| -2 | -9 | -3 | 6.38  | 1.05 |
| -2 | 9  | 3  | 4.53  | 0.84 |
| -2 | -9 | -3 | 6.08  | 0.87 |
| 2  | 9  | -3 | 4.31  | 1.05 |
| -2 | -9 | -3 | 5.33  | 1.00 |
| 2  | -9 | 3  | 6.58  | 1.01 |
| -2 | -9 | 3  | 4.48  | 0.86 |
| -2 | -9 | 3  | 5.02  | 0.86 |
| -2 | -9 | 3  | 4.77  | 0.89 |
| -2 | -9 | 3  | 5.11  | 0.94 |
| -2 | 9  | -3 | 5.85  | 1.03 |
| 2  | 9  | 3  | 4.16  | 0.99 |
| 2  | -9 | -3 | 5.47  | 1.05 |
| -2 | 9  | -3 | 4.65  | 1.09 |
| 3  | -9 | 3  | 4.77  | 0.98 |
| -3 | -9 | -3 | 5.89  | 1.00 |
| 3  | 9  | -3 | 1.72  | 0.89 |
| -3 | -9 | -3 | 1.47  | 0.79 |
| 3  | 9  | -3 | 3.65  | 0.98 |
| -3 | 9  | 3  | 3.14  | 0.84 |
| -3 | -9 | -3 | 3.90  | 0.97 |
| -3 | -9 | -3 | 3.47  | 0.73 |
| -3 | -9 | -3 | 4.08  | 0.96 |
| -3 | -9 | -3 | 5.45  | 1.02 |
| -3 | 9  | 3  | 3.23  | 0.71 |
| -3 | -9 | -3 | 4.44  | 0.96 |
| 3  | 9  | 3  | 3.95  | 0.99 |
| -3 | -9 | 3  | 3.89  | 0.95 |
| -3 | -9 | 3  | 3.89  | 0.82 |
| -3 | 9  | -3 | 3.76  | 0.95 |
| -3 | 9  | -3 | 3.35  | 0.91 |
| -3 | -9 | 3  | 2.80  | 0.74 |
| -3 | -9 | 3  | 4.76  | 0.93 |
| -3 | -9 | 3  | 3.19  | 0.71 |
| -3 | -9 | 3  | 4.24  | 0.78 |
| -3 | 9  | -3 | 2.44  | 0.81 |
| -4 | 9  | 3  | 19.44 | 1.38 |

## CIF S3

|    |    |    |       |      |
|----|----|----|-------|------|
| 4  | -9 | 3  | 19.45 | 1.53 |
| -4 | -9 | -3 | 18.30 | 1.39 |
| -4 | -9 | -3 | 20.67 | 1.44 |
| -4 | -9 | -3 | 21.46 | 1.31 |
| -4 | -9 | -3 | 20.88 | 1.54 |
| -4 | -9 | -3 | 21.70 | 1.60 |
| -4 | 9  | 3  | 19.46 | 1.45 |
| -4 | -9 | -3 | 18.71 | 1.31 |
| 4  | 9  | -3 | 18.86 | 1.48 |
| -4 | 9  | 3  | 19.10 | 1.47 |
| -4 | -9 | -3 | 17.16 | 1.37 |
| 4  | -9 | -3 | 18.76 | 1.78 |
| -4 | -9 | 3  | 18.72 | 1.51 |
| -4 | -9 | 3  | 21.44 | 1.32 |
| -4 | -9 | 3  | 19.07 | 1.58 |
| -4 | -9 | 3  | 19.91 | 1.64 |
| -4 | -9 | 3  | 20.71 | 1.44 |
| -4 | -9 | 3  | 17.81 | 1.38 |
| -4 | 9  | -3 | 20.27 | 1.52 |
| -4 | -9 | 3  | 18.92 | 1.15 |
| -4 | 9  | -3 | 19.25 | 1.57 |
| -5 | 9  | 3  | 2.94  | 0.80 |
| -5 | -9 | -3 | 3.28  | 0.91 |
| -5 | -9 | -3 | 3.50  | 0.58 |
| -5 | -9 | -3 | 3.62  | 0.77 |
| -5 | -9 | -3 | 3.69  | 0.93 |
| -5 | -9 | -3 | 3.15  | 0.75 |
| -5 | 9  | 3  | 2.30  | 0.51 |
| -5 | -9 | -3 | 3.76  | 0.97 |
| -5 | -9 | -3 | 3.18  | 0.80 |
| -5 | -9 | -3 | 2.40  | 0.75 |
| -5 | 9  | 3  | 4.28  | 1.28 |
| -5 | 9  | 3  | 3.61  | 0.94 |
| -5 | -9 | -3 | 3.16  | 0.88 |
| -5 | 9  | 3  | 3.22  | 0.69 |
| 5  | -9 | 3  | 4.49  | 1.07 |
| -5 | 9  | 3  | 1.52  | 1.12 |
| -5 | -9 | -3 | 5.26  | 1.09 |
| -5 | 9  | -3 | 3.28  | 0.91 |
| -5 | -9 | 3  | 3.32  | 0.82 |
| -5 | 9  | -3 | 4.09  | 1.05 |

## CIF S3

|    |    |    |       |      |
|----|----|----|-------|------|
| -5 | 9  | -3 | 3.94  | 1.16 |
| -5 | 9  | -3 | 3.96  | 0.88 |
| -5 | -9 | 3  | 2.54  | 0.90 |
| -5 | -9 | 3  | 1.95  | 0.64 |
| -5 | -9 | 3  | 3.72  | 0.96 |
| -5 | -9 | 3  | 3.24  | 0.72 |
| -5 | -9 | 3  | 2.93  | 0.72 |
| -5 | -9 | 3  | 3.25  | 0.77 |
| -5 | -9 | 3  | 2.57  | 0.79 |
| -6 | 9  | 3  | 17.05 | 1.33 |
| 6  | -9 | 3  | 17.57 | 1.43 |
| -6 | -9 | -3 | 13.88 | 1.20 |
| -6 | 9  | 3  | 17.96 | 1.23 |
| -6 | 9  | 3  | 20.32 | 1.55 |
| -6 | 9  | 3  | 17.18 | 1.37 |
| -6 | -9 | -3 | 18.19 | 1.30 |
| -6 | -9 | -3 | 18.68 | 1.23 |
| -6 | -9 | -3 | 15.05 | 1.23 |
| -6 | -9 | -3 | 17.66 | 1.22 |
| -6 | -9 | -3 | 18.59 | 1.59 |
| -6 | 9  | 3  | 17.63 | 1.39 |
| -6 | 9  | 3  | 17.52 | 1.30 |
| -6 | 9  | 3  | 18.84 | 1.29 |
| -6 | -9 | -3 | 18.14 | 1.49 |
| -6 | -9 | 3  | 19.33 | 1.46 |
| -6 | -9 | 3  | 15.80 | 1.13 |
| -6 | 9  | -3 | 17.27 | 1.38 |
| -6 | -9 | 3  | 18.69 | 1.42 |
| -6 | -9 | 3  | 18.44 | 1.15 |
| -6 | 9  | -3 | 18.08 | 1.26 |
| -6 | -9 | 3  | 17.54 | 1.08 |
| -6 | 9  | -3 | 17.50 | 1.12 |
| -6 | -9 | 3  | 18.18 | 1.02 |
| -6 | 9  | -3 | 18.52 | 1.63 |
| -7 | 9  | 3  | 2.09  | 0.55 |
| -7 | 9  | 3  | 2.74  | 0.78 |
| -7 | -9 | -3 | 2.12  | 0.52 |
| -7 | -9 | -3 | 2.13  | 1.15 |
| -7 | -9 | -3 | 2.16  | 0.57 |
| -7 | 9  | 3  | 3.05  | 0.75 |
| -7 | -9 | -3 | 2.06  | 0.93 |

## CIF S3

|    |     |    |       |      |
|----|-----|----|-------|------|
| -7 | 9   | 3  | 3.24  | 0.86 |
| -7 | 9   | 3  | 2.65  | 0.60 |
| -7 | -9  | -3 | 3.52  | 0.76 |
| -7 | 9   | 3  | 3.01  | 0.90 |
| -7 | 9   | 3  | 2.48  | 0.58 |
| 7  | -9  | 3  | 2.75  | 0.98 |
| -7 | -9  | 3  | 3.40  | 0.51 |
| -7 | 9   | -3 | 4.31  | 0.84 |
| -7 | -9  | 3  | 3.17  | 0.45 |
| -7 | -9  | 3  | 1.14  | 0.82 |
| -7 | -9  | 3  | 2.77  | 0.68 |
| -7 | 9   | -3 | 3.24  | 0.85 |
| -7 | 9   | -3 | 2.62  | 0.90 |
| -8 | -9  | -3 | 1.28  | 0.38 |
| -8 | 9   | 3  | 1.32  | 0.39 |
| -8 | 9   | 3  | 0.26  | 0.33 |
| -8 | -9  | -3 | 1.41  | 0.32 |
| -8 | 9   | 3  | 0.93  | 0.43 |
| -8 | 9   | 3  | 0.66  | 0.43 |
| -8 | -9  | -3 | 1.40  | 0.37 |
| 8  | -9  | 3  | 0.70  | 0.50 |
| -8 | 9   | -3 | 1.09  | 0.44 |
| -8 | 9   | -3 | 1.36  | 0.40 |
| -8 | 9   | -3 | 0.88  | 0.66 |
| -8 | 9   | -3 | 0.96  | 0.44 |
| -8 | 9   | -3 | 1.50  | 0.47 |
| -8 | -9  | 3  | 0.56  | 0.77 |
| 0  | -10 | 3  | 28.01 | 1.76 |
| 0  | -10 | -3 | 28.24 | 1.84 |
| 0  | 10  | 3  | 31.16 | 1.84 |
| 0  | -10 | -3 | 29.86 | 1.88 |
| 0  | -10 | 3  | 29.03 | 1.88 |
| 0  | 10  | -3 | 27.82 | 2.03 |
| 0  | -10 | 3  | 28.81 | 1.80 |
| -1 | 10  | 3  | 9.34  | 1.06 |
| 1  | -10 | 3  | 8.72  | 1.09 |
| -1 | -10 | -3 | 7.73  | 1.09 |
| 1  | -10 | 3  | 9.62  | 1.08 |
| -1 | -10 | -3 | 9.52  | 1.09 |
| 1  | 10  | -3 | 7.62  | 1.31 |
| 1  | -10 | 3  | 9.13  | 1.13 |

## CIF S3

|    |     |    |       |      |
|----|-----|----|-------|------|
| -1 | -10 | -3 | 8.45  | 1.30 |
| 1  | 10  | -3 | 7.20  | 1.22 |
| -1 | -10 | 3  | 10.47 | 1.00 |
| -1 | -10 | 3  | 11.08 | 1.09 |
| -1 | 10  | -3 | 9.41  | 1.18 |
| -1 | -10 | 3  | 10.99 | 1.09 |
| 1  | -10 | -3 | 9.63  | 1.19 |
| 2  | 10  | -3 | 7.49  | 1.24 |
| -2 | 10  | 3  | 9.06  | 1.05 |
| -2 | -10 | -3 | 8.24  | 1.14 |
| 2  | -10 | 3  | 8.35  | 1.17 |
| -2 | -10 | -3 | 7.91  | 1.15 |
| -2 | -10 | -3 | 10.58 | 1.20 |
| -2 | -10 | -3 | 9.01  | 1.26 |
| -2 | -10 | -3 | 9.75  | 1.06 |
| 2  | 10  | -3 | 6.88  | 1.29 |
| -2 | -10 | 3  | 8.19  | 1.12 |
| 2  | 10  | 3  | 7.99  | 1.22 |
| 2  | -10 | -3 | 10.09 | 1.24 |
| -2 | 10  | -3 | 9.33  | 1.21 |
| -2 | -10 | 3  | 7.92  | 1.02 |
| -2 | 10  | -3 | 8.56  | 1.28 |
| -2 | -10 | 3  | 8.88  | 1.03 |
| -2 | -10 | 3  | 8.18  | 1.00 |
| -2 | -10 | 3  | 7.87  | 0.98 |
| -2 | -10 | 3  | 7.71  | 1.15 |
| -3 | -10 | -3 | 8.29  | 1.13 |
| -3 | -10 | -3 | 10.46 | 1.28 |
| -3 | -10 | -3 | 10.76 | 1.05 |
| 3  | -10 | 3  | 12.34 | 1.34 |
| -3 | 10  | 3  | 11.84 | 1.19 |
| -3 | 10  | 3  | 10.58 | 1.22 |
| -3 | -10 | -3 | 9.29  | 1.31 |
| 3  | 10  | -3 | 12.81 | 1.30 |
| -3 | -10 | -3 | 10.08 | 1.27 |
| -3 | -10 | -3 | 9.11  | 1.04 |
| -3 | -10 | 3  | 10.26 | 0.80 |
| -3 | 10  | -3 | 10.54 | 1.26 |
| -3 | -10 | 3  | 9.73  | 1.17 |
| -3 | -10 | 3  | 9.50  | 1.20 |
| -3 | -10 | 3  | 9.45  | 0.99 |

## CIF S3

|    |     |    |       |      |
|----|-----|----|-------|------|
| -3 | -10 | 3  | 9.88  | 1.10 |
| -3 | -10 | 3  | 9.90  | 1.14 |
| -3 | 10  | -3 | 10.00 | 1.28 |
| 3  | 10  | 3  | 6.04  | 1.18 |
| -3 | 10  | -3 | 9.50  | 1.30 |
| -3 | -10 | 3  | 7.64  | 1.11 |
| -4 | 10  | 3  | 0.41  | 0.74 |
| -4 | 10  | 3  | 1.07  | 0.84 |
| -4 | 10  | 3  | 0.98  | 0.70 |
| -4 | -10 | -3 | 1.10  | 0.89 |
| -4 | 10  | 3  | 1.33  | 0.74 |
| 4  | -10 | 3  | 1.53  | 0.59 |
| -4 | -10 | -3 | -0.23 | 0.76 |
| -4 | -10 | -3 | -0.87 | 0.64 |
| -4 | -10 | -3 | 0.15  | 0.74 |
| -4 | -10 | -3 | 1.36  | 0.97 |
| -4 | -10 | -3 | 0.71  | 0.61 |
| -4 | -10 | -3 | -0.26 | 0.70 |
| -4 | 10  | 3  | 0.84  | 1.00 |
| -4 | -10 | -3 | 0.00  | 0.78 |
| -4 | -10 | -3 | 0.36  | 0.85 |
| 4  | -10 | 3  | 0.07  | 0.88 |
| -4 | 10  | 3  | 1.04  | 0.63 |
| -4 | 10  | 3  | 0.36  | 0.73 |
| -4 | -10 | -3 | -0.36 | 0.78 |
| -4 | -10 | 3  | 0.10  | 0.57 |
| -4 | 10  | -3 | 0.61  | 0.89 |
| -4 | -10 | 3  | 0.10  | 0.67 |
| -4 | -10 | 3  | -0.44 | 0.41 |
| 4  | -10 | -3 | -0.41 | 0.85 |
| -4 | -10 | 3  | -0.69 | 0.82 |
| -4 | -10 | 3  | -0.55 | 0.81 |
| -4 | -10 | 3  | -0.51 | 0.84 |
| -4 | -10 | 3  | 0.52  | 0.65 |
| -4 | -10 | 3  | 0.68  | 0.83 |
| -4 | -10 | 3  | 0.41  | 0.63 |
| -4 | 10  | -3 | 0.88  | 0.77 |
| -5 | -10 | -3 | 1.20  | 0.68 |
| -5 | -10 | -3 | 1.72  | 0.83 |
| 5  | -10 | 3  | 1.76  | 0.63 |
| -5 | 10  | 3  | 1.80  | 0.97 |

## CIF S3

|    |     |    |      |      |
|----|-----|----|------|------|
| -5 | 10  | 3  | 4.27 | 1.04 |
| -5 | 10  | 3  | 2.35 | 0.46 |
| -5 | -10 | -3 | 2.56 | 1.02 |
| -5 | -10 | -3 | 1.87 | 0.74 |
| -5 | -10 | -3 | 0.86 | 0.71 |
| -5 | 10  | 3  | 1.85 | 0.63 |
| -5 | -10 | -3 | 2.07 | 0.97 |
| -5 | -10 | -3 | 1.79 | 0.67 |
| -5 | 10  | 3  | 0.58 | 0.66 |
| -5 | -10 | -3 | 1.67 | 0.73 |
| -5 | -10 | 3  | 1.92 | 0.62 |
| -5 | -10 | 3  | 1.89 | 0.52 |
| -5 | -10 | 3  | 1.70 | 0.47 |
| -5 | -10 | 3  | 1.08 | 0.82 |
| -5 | 10  | -3 | 1.93 | 0.80 |
| -5 | -10 | 3  | 2.87 | 0.76 |
| -5 | -10 | 3  | 2.53 | 0.91 |
| -5 | 10  | -3 | 1.45 | 0.99 |
| -5 | -10 | 3  | 1.44 | 0.94 |
| 5  | -10 | -3 | 2.04 | 0.83 |
| -6 | -10 | -3 | 1.49 | 0.89 |
| -6 | 10  | 3  | 1.88 | 0.61 |
| 6  | -10 | 3  | 1.08 | 0.61 |
| -6 | 10  | 3  | 1.82 | 0.81 |
| -6 | -10 | -3 | 0.55 | 0.59 |
| -6 | -10 | -3 | 0.86 | 0.94 |
| -6 | 10  | 3  | 0.92 | 0.60 |
| -6 | -10 | -3 | 1.86 | 0.57 |
| -6 | 10  | 3  | 1.13 | 0.57 |
| -6 | 10  | 3  | 0.99 | 0.64 |
| -6 | -10 | -3 | 2.48 | 0.85 |
| -6 | -10 | -3 | 1.79 | 0.59 |
| -6 | 10  | 3  | 0.97 | 0.50 |
| -6 | -10 | 3  | 0.76 | 1.13 |
| -6 | 10  | -3 | 1.50 | 0.38 |
| -6 | -10 | 3  | 1.28 | 0.32 |
| -6 | 10  | -3 | 1.79 | 0.89 |
| -6 | -10 | 3  | 0.38 | 0.77 |
| -6 | -10 | 3  | 0.78 | 0.42 |
| -6 | 10  | -3 | 1.76 | 0.65 |
| 6  | -10 | -3 | 0.23 | 0.74 |

## CIF S3

|    |     |    |       |      |
|----|-----|----|-------|------|
| -6 | -10 | 3  | 1.61  | 0.39 |
| -6 | 10  | -3 | 0.23  | 0.68 |
| -6 | -10 | 3  | 0.72  | 0.85 |
| -7 | 10  | 3  | 0.56  | 0.46 |
| -7 | -10 | -3 | 0.89  | 0.47 |
| -7 | 10  | 3  | 1.20  | 0.45 |
| -7 | 10  | 3  | 0.68  | 0.45 |
| -7 | -10 | -3 | 0.89  | 0.37 |
| -7 | 10  | 3  | 0.55  | 0.50 |
| -7 | 10  | 3  | 1.21  | 0.51 |
| -7 | 10  | 3  | 0.25  | 0.59 |
| 7  | -10 | 3  | 0.80  | 0.51 |
| -7 | 10  | 3  | 0.16  | 0.49 |
| -7 | -10 | -3 | 0.96  | 0.39 |
| -7 | -10 | 3  | 1.31  | 0.33 |
| 7  | -10 | -3 | 0.78  | 0.66 |
| -7 | -10 | 3  | 0.67  | 0.26 |
| -7 | 10  | -3 | 1.36  | 0.50 |
| -7 | -10 | 3  | 0.01  | 0.59 |
| -7 | 10  | -3 | 0.49  | 0.56 |
| -7 | 10  | -3 | 1.04  | 0.78 |
| 8  | -10 | 3  | 3.69  | 0.64 |
| -8 | 10  | 3  | 3.76  | 0.61 |
| -8 | 10  | 3  | 3.99  | 0.59 |
| -8 | 10  | 3  | 4.91  | 0.56 |
| -8 | 10  | 3  | 5.30  | 0.54 |
| -8 | -10 | -3 | 5.70  | 0.45 |
| -8 | -10 | -3 | 4.36  | 0.56 |
| 8  | -10 | -3 | 5.59  | 0.79 |
| -8 | 10  | -3 | 4.31  | 0.52 |
| -8 | 10  | -3 | 4.58  | 0.59 |
| -8 | 10  | -3 | 5.38  | 0.59 |
| -8 | 10  | -3 | 4.03  | 0.82 |
| 0  | -11 | -3 | 11.56 | 1.41 |
| 0  | -11 | -3 | 15.41 | 1.45 |
| 0  | -11 | 3  | 12.94 | 1.19 |
| 0  | 11  | 3  | 11.78 | 1.20 |
| 0  | -11 | 3  | 11.75 | 1.18 |
| 0  | -11 | 3  | 11.77 | 1.30 |
| 1  | -11 | 3  | 18.50 | 1.60 |
| -1 | -11 | -3 | 20.38 | 1.42 |



## CIF S3

|    |     |    |       |      |
|----|-----|----|-------|------|
| 1  | -11 | 3  | 20.05 | 1.56 |
| -1 | 11  | 3  | 18.82 | 1.47 |
| -1 | -11 | -3 | 19.24 | 1.61 |
| -1 | -11 | -3 | 22.21 | 1.53 |
| 1  | -11 | -3 | 21.18 | 1.63 |
| -1 | -11 | 3  | 20.69 | 1.52 |
| 1  | -11 | -3 | 20.28 | 1.60 |
| -1 | -11 | 3  | 18.54 | 1.48 |
| -1 | -11 | 3  | 18.32 | 1.39 |
| 2  | -11 | 3  | 29.56 | 1.83 |
| 2  | -11 | 3  | 26.31 | 2.16 |
| -2 | -11 | -3 | 26.83 | 1.69 |
| -2 | 11  | 3  | 28.61 | 1.78 |
| -2 | -11 | -3 | 23.85 | 1.76 |
| -2 | -11 | -3 | 22.28 | 1.71 |
| -2 | -11 | -3 | 22.78 | 1.65 |
| -2 | -11 | -3 | 25.06 | 1.65 |
| 2  | -11 | 3  | 27.16 | 1.99 |
| -2 | -11 | 3  | 24.96 | 1.70 |
| -2 | -11 | 3  | 17.30 | 2.22 |
| -2 | -11 | 3  | 23.13 | 1.61 |
| -2 | -11 | 3  | 25.72 | 1.70 |
| -2 | -11 | 3  | 26.00 | 1.67 |
| -2 | -11 | 3  | 15.31 | 1.94 |
| -2 | 11  | -3 | 23.61 | 1.75 |
| -2 | 11  | -3 | 21.72 | 1.74 |
| 2  | -11 | -3 | 29.92 | 1.93 |
| -2 | -11 | 3  | 24.72 | 1.55 |
| -2 | -11 | 3  | 21.83 | 2.23 |
| -3 | 11  | 3  | 3.81  | 0.97 |
| -3 | 11  | 3  | 6.27  | 1.55 |
| -3 | -11 | -3 | 5.41  | 1.16 |
| -3 | -11 | -3 | 4.87  | 1.03 |
| -3 | 11  | 3  | 5.32  | 1.06 |
| 3  | -11 | 3  | 5.86  | 1.12 |
| -3 | -11 | -3 | 5.37  | 1.08 |
| -3 | -11 | -3 | 5.28  | 1.09 |
| 3  | -11 | 3  | 6.41  | 1.72 |
| -3 | -11 | -3 | 6.10  | 1.15 |
| -3 | -11 | -3 | 5.33  | 1.03 |
| -3 | -11 | 3  | 5.60  | 1.11 |

## CIF S3

|    |     |    |      |      |
|----|-----|----|------|------|
| -3 | -11 | 3  | 5.13 | 1.01 |
| -3 | -11 | 3  | 4.58 | 1.12 |
| -3 | -11 | 3  | 5.98 | 0.98 |
| -3 | -11 | 3  | 5.19 | 1.03 |
| -3 | -11 | 3  | 4.51 | 1.17 |
| -3 | 11  | -3 | 4.37 | 1.01 |
| -3 | 11  | -3 | 6.54 | 1.21 |
| 3  | -11 | -3 | 5.56 | 1.11 |
| -3 | -11 | 3  | 6.13 | 1.26 |
| -3 | -11 | 3  | 6.26 | 0.97 |
| -3 | -11 | 3  | 5.04 | 0.95 |
| -4 | -11 | -3 | 5.32 | 1.04 |
| -4 | -11 | -3 | 3.59 | 0.97 |
| -4 | 11  | 3  | 5.45 | 0.75 |
| -4 | 11  | 3  | 5.27 | 0.91 |
| -4 | -11 | -3 | 5.33 | 1.00 |
| -4 | -11 | -3 | 5.35 | 1.05 |
| -4 | 11  | 3  | 4.18 | 0.97 |
| -4 | -11 | -3 | 6.81 | 1.20 |
| -4 | -11 | -3 | 5.56 | 0.81 |
| -4 | 11  | 3  | 5.16 | 1.31 |
| -4 | 11  | 3  | 5.35 | 1.23 |
| -4 | -11 | -3 | 4.85 | 1.14 |
| -4 | -11 | -3 | 5.42 | 0.98 |
| -4 | -11 | -3 | 4.34 | 1.02 |
| -4 | -11 | 3  | 5.34 | 0.89 |
| 4  | -11 | -3 | 4.24 | 1.09 |
| -4 | -11 | 3  | 6.83 | 1.17 |
| -4 | -11 | 3  | 5.80 | 1.29 |
| -4 | -11 | 3  | 3.73 | 0.94 |
| -4 | -11 | 3  | 5.09 | 1.25 |
| -4 | -11 | 3  | 3.92 | 0.89 |
| -4 | -11 | 3  | 4.95 | 0.87 |
| -5 | 11  | 3  | 7.20 | 0.94 |
| -5 | 11  | 3  | 6.10 | 1.38 |
| -5 | -11 | -3 | 7.54 | 1.13 |
| -5 | -11 | -3 | 8.73 | 1.22 |
| -5 | 11  | 3  | 7.00 | 0.94 |
| -5 | -11 | -3 | 7.56 | 1.10 |
| -5 | -11 | -3 | 7.40 | 1.00 |
| 5  | -11 | 3  | 6.13 | 0.80 |

## CIF S3

|    |     |    |       |      |
|----|-----|----|-------|------|
| -5 | 11  | 3  | 5.89  | 1.04 |
| -5 | -11 | -3 | 7.49  | 1.23 |
| -5 | -11 | -3 | 6.43  | 0.89 |
| -5 | -11 | -3 | 8.19  | 0.99 |
| -5 | -11 | 3  | 8.99  | 1.22 |
| -5 | -11 | 3  | 11.19 | 1.11 |
| -5 | 11  | -3 | 6.91  | 1.28 |
| -5 | -11 | 3  | 7.60  | 0.80 |
| -5 | 11  | -3 | 5.39  | 1.04 |
| -5 | -11 | 3  | 7.03  | 1.09 |
| -5 | -11 | 3  | 10.14 | 1.33 |
| -5 | -11 | 3  | 7.24  | 0.79 |
| 5  | -11 | -3 | 8.40  | 1.16 |
| -5 | -11 | 3  | 7.26  | 0.84 |
| -6 | -11 | -3 | 3.43  | 0.92 |
| 6  | -11 | 3  | 2.78  | 0.70 |
| -6 | -11 | -3 | 5.34  | 0.80 |
| -6 | -11 | -3 | 2.97  | 1.12 |
| -6 | 11  | 3  | 3.82  | 0.71 |
| -6 | 11  | 3  | 4.22  | 0.87 |
| -6 | -11 | -3 | 3.47  | 0.79 |
| -6 | 11  | 3  | 4.36  | 0.75 |
| -6 | 11  | 3  | 2.84  | 0.74 |
| -6 | 11  | 3  | 4.37  | 0.83 |
| 6  | -11 | -3 | 3.52  | 1.06 |
| -6 | -11 | 3  | 4.77  | 0.44 |
| -6 | 11  | -3 | 4.13  | 1.15 |
| -6 | -11 | 3  | 3.51  | 0.95 |
| -6 | -11 | 3  | 3.62  | 0.57 |
| -6 | 11  | -3 | 3.35  | 0.83 |
| -6 | 11  | -3 | 3.65  | 0.83 |
| -6 | -11 | 3  | 1.22  | 0.92 |
| -6 | -11 | 3  | 4.79  | 0.56 |
| -7 | 11  | 3  | 0.53  | 0.44 |
| -7 | 11  | 3  | 0.51  | 0.40 |
| -7 | 11  | 3  | 1.20  | 0.39 |
| -7 | -11 | -3 | 0.65  | 0.31 |
| -7 | 11  | 3  | 1.28  | 0.45 |
| -7 | 11  | 3  | 0.30  | 0.40 |
| -7 | 11  | 3  | 0.80  | 0.52 |
| -7 | -11 | -3 | 0.34  | 0.39 |

## CIF S3

|    |     |    |       |      |
|----|-----|----|-------|------|
| -7 | -11 | 3  | 0.40  | 0.21 |
| -7 | 11  | -3 | 0.68  | 0.47 |
| -7 | -11 | 3  | 0.28  | 0.24 |
| -7 | 11  | -3 | -0.23 | 0.62 |
| 7  | -11 | -3 | 0.48  | 0.46 |
| -7 | -11 | 3  | 0.89  | 0.25 |
| 0  | 12  | 3  | 16.40 | 1.72 |
| 0  | -12 | -3 | 16.71 | 1.60 |
| 0  | -12 | 3  | 16.21 | 1.61 |
| 0  | -12 | 3  | 16.28 | 1.51 |
| 0  | -12 | 3  | 17.41 | 1.30 |
| 0  | -12 | 3  | 15.39 | 1.40 |
| 0  | -12 | 3  | 16.04 | 1.97 |
| 0  | -12 | -3 | 17.80 | 1.48 |
| 0  | -12 | -3 | 16.71 | 1.54 |
| 0  | -12 | 3  | 16.48 | 1.46 |
| 1  | -12 | 3  | 11.68 | 1.23 |
| -1 | -12 | -3 | 10.35 | 1.20 |
| -1 | -12 | -3 | 10.32 | 1.32 |
| 1  | -12 | 3  | 11.68 | 1.39 |
| 1  | -12 | 3  | 10.49 | 1.56 |
| 1  | -12 | 3  | 9.70  | 1.58 |
| -1 | -12 | -3 | 10.12 | 1.72 |
| 1  | -12 | -3 | 11.34 | 1.92 |
| -1 | -12 | 3  | 8.44  | 1.28 |
| -1 | -12 | 3  | 10.31 | 1.11 |
| -1 | -12 | 3  | 10.10 | 1.13 |
| -1 | -12 | 3  | 10.93 | 1.36 |
| -1 | -12 | 3  | 8.80  | 1.15 |
| -1 | -12 | 3  | 11.40 | 1.22 |
| 1  | -12 | -3 | 9.12  | 1.02 |
| -1 | -12 | 3  | 11.73 | 1.44 |
| -2 | -12 | -3 | 0.62  | 0.77 |
| 2  | -12 | 3  | -0.14 | 1.03 |
| -2 | -12 | -3 | 0.46  | 0.56 |
| -2 | -12 | -3 | 1.42  | 0.87 |
| 2  | -12 | 3  | 0.01  | 0.42 |
| -2 | -12 | -3 | 1.48  | 0.88 |
| 2  | -12 | 3  | 1.22  | 1.03 |
| -2 | -12 | 3  | -0.12 | 0.79 |
| 2  | -12 | -3 | 1.14  | 0.75 |

## CIF S3

|    |     |    |       |      |
|----|-----|----|-------|------|
| -2 | -12 | 3  | -0.47 | 0.74 |
| -2 | -12 | 3  | 0.40  | 0.61 |
| -2 | -12 | 3  | -0.08 | 0.62 |
| -2 | -12 | 3  | 1.11  | 0.82 |
| -2 | -12 | 3  | -0.58 | 1.14 |
| -2 | -12 | 3  | 0.43  | 0.74 |
| -2 | -12 | 3  | -0.41 | 0.69 |
| -2 | -12 | 3  | 0.07  | 0.82 |
| 3  | -12 | 3  | 15.36 | 1.43 |
| -3 | -12 | -3 | 14.53 | 1.14 |
| -3 | -12 | -3 | 13.02 | 1.31 |
| -3 | 12  | 3  | 13.00 | 1.21 |
| -3 | -12 | -3 | 10.49 | 1.19 |
| -3 | -12 | -3 | 14.73 | 2.55 |
| -3 | -12 | -3 | 13.03 | 1.34 |
| -3 | -12 | -3 | 13.40 | 1.25 |
| -3 | -12 | -3 | 14.01 | 1.25 |
| -3 | 12  | 3  | 13.74 | 1.69 |
| -3 | -12 | 3  | 12.66 | 1.21 |
| -3 | -12 | 3  | 10.74 | 1.07 |
| -3 | -12 | 3  | 12.17 | 1.30 |
| 3  | -12 | -3 | 12.68 | 1.06 |
| -3 | -12 | 3  | 10.07 | 1.13 |
| -3 | -12 | 3  | 14.09 | 1.09 |
| -3 | -12 | 3  | 12.66 | 1.17 |
| 3  | -12 | -3 | 13.43 | 1.30 |
| -3 | -12 | 3  | 14.49 | 1.36 |
| -3 | -12 | 3  | 15.80 | 1.31 |
| -3 | -12 | 3  | 12.34 | 1.29 |
| -4 | -12 | -3 | 7.65  | 0.61 |
| -4 | 12  | 3  | 5.34  | 1.48 |
| -4 | -12 | -3 | 8.03  | 1.05 |
| -4 | 12  | 3  | 6.71  | 0.70 |
| -4 | -12 | -3 | 5.78  | 0.96 |
| -4 | -12 | -3 | 9.25  | 1.24 |
| -4 | -12 | -3 | 5.89  | 1.15 |
| -4 | 12  | 3  | 7.28  | 0.92 |
| -4 | -12 | -3 | 7.16  | 1.06 |
| -4 | 12  | 3  | 6.98  | 0.97 |
| 4  | -12 | -3 | 8.57  | 1.47 |
| -4 | -12 | 3  | 7.96  | 0.95 |

## CIF S3

|    |     |    |       |      |
|----|-----|----|-------|------|
| -4 | -12 | 3  | 8.26  | 0.99 |
| -4 | -12 | 3  | 9.29  | 1.25 |
| 4  | -12 | -3 | 6.42  | 0.93 |
| -4 | -12 | 3  | 8.62  | 0.88 |
| -4 | -12 | 3  | 5.09  | 1.11 |
| -4 | -12 | 3  | 8.93  | 1.24 |
| -5 | -12 | -3 | 1.99  | 0.56 |
| -5 | 12  | 3  | 2.47  | 0.82 |
| -5 | 12  | 3  | 4.06  | 0.90 |
| -5 | -12 | -3 | 2.32  | 0.59 |
| -5 | 12  | 3  | 1.06  | 0.58 |
| -5 | -12 | -3 | 2.53  | 0.69 |
| -5 | 12  | 3  | 3.08  | 0.74 |
| -5 | -12 | -3 | 1.27  | 0.58 |
| -5 | -12 | -3 | 1.20  | 0.68 |
| -5 | 12  | 3  | 2.41  | 0.66 |
| -5 | -12 | 3  | 3.13  | 0.67 |
| -5 | -12 | 3  | 3.05  | 0.63 |
| -5 | 12  | -3 | 2.99  | 0.82 |
| -5 | -12 | 3  | 3.47  | 1.13 |
| 5  | -12 | -3 | 3.21  | 0.79 |
| -5 | -12 | 3  | 2.74  | 0.51 |
| -5 | -12 | 3  | 2.54  | 0.69 |
| -5 | 12  | -3 | 2.56  | 0.52 |
| -6 | -12 | -3 | 0.53  | 0.40 |
| -6 | 12  | 3  | 0.19  | 0.43 |
| -6 | -12 | -3 | -0.26 | 0.36 |
| -6 | -12 | -3 | 0.43  | 0.42 |
| -6 | 12  | 3  | 0.55  | 0.49 |
| -6 | 12  | 3  | 0.01  | 0.58 |
| -6 | 12  | 3  | 0.52  | 0.35 |
| -6 | 12  | -3 | -0.60 | 0.68 |
| -6 | -12 | 3  | -0.02 | 0.32 |
| -6 | -12 | 3  | 0.18  | 0.30 |
| -6 | 12  | -3 | 0.93  | 0.46 |
| -6 | -12 | 3  | 0.24  | 0.81 |
| 6  | -12 | -3 | -0.17 | 0.41 |
| 0  | -13 | 3  | 0.84  | 0.94 |
| 0  | -13 | -3 | 0.02  | 1.05 |
| 0  | -13 | 3  | 0.04  | 0.73 |
| 0  | -13 | 3  | -0.27 | 0.48 |

## CIF S3

|    |     |    |       |      |
|----|-----|----|-------|------|
| 0  | -13 | 3  | 0.26  | 0.95 |
| 0  | -13 | -3 | 0.08  | 0.78 |
| 0  | -13 | -3 | 0.30  | 0.39 |
| 0  | -13 | 3  | -0.29 | 0.72 |
| 0  | -13 | 3  | 0.10  | 0.73 |
| -1 | -13 | -3 | 3.48  | 0.89 |
| 1  | -13 | 3  | 2.35  | 0.98 |
| 1  | -13 | 3  | 1.05  | 0.46 |
| -1 | -13 | -3 | 1.58  | 0.99 |
| -1 | -13 | -3 | 1.57  | 0.82 |
| 1  | -13 | 3  | 1.87  | 0.80 |
| -1 | -13 | -3 | 2.99  | 0.84 |
| 1  | -13 | 3  | 0.14  | 1.02 |
| 1  | -13 | 3  | 0.82  | 0.97 |
| -1 | -13 | -3 | 0.66  | 0.50 |
| -1 | -13 | 3  | 1.21  | 0.70 |
| -1 | -13 | 3  | 1.45  | 0.85 |
| -1 | -13 | 3  | 1.81  | 0.72 |
| -1 | -13 | 3  | 1.54  | 0.72 |
| -1 | -13 | 3  | 0.97  | 0.96 |
| -1 | -13 | 3  | 1.25  | 0.56 |
| -1 | -13 | 3  | 1.82  | 0.69 |
| -1 | -13 | 3  | 1.38  | 0.83 |
| 1  | -13 | -3 | 2.12  | 1.05 |
| 2  | -13 | 3  | 0.34  | 0.93 |
| 2  | -13 | 3  | 0.78  | 0.90 |
| -2 | -13 | -3 | 0.95  | 0.75 |
| -2 | -13 | -3 | 0.30  | 0.81 |
| -2 | -13 | -3 | 0.54  | 0.90 |
| -2 | -13 | -3 | 0.45  | 0.50 |
| -2 | -13 | -3 | 0.90  | 0.67 |
| -2 | -13 | -3 | 0.06  | 0.75 |
| 2  | -13 | -3 | 0.27  | 1.00 |
| -2 | -13 | 3  | -0.14 | 0.78 |
| -2 | -13 | 3  | 0.02  | 0.94 |
| -2 | -13 | 3  | 0.41  | 0.76 |
| -2 | -13 | 3  | -0.07 | 0.72 |
| -2 | -13 | 3  | 0.79  | 0.67 |
| -2 | -13 | 3  | 1.35  | 0.57 |
| -2 | -13 | 3  | 0.58  | 0.65 |
| -3 | -13 | -3 | 6.33  | 1.50 |

## CIF S3

|    |     |    |      |      |
|----|-----|----|------|------|
| -3 | -13 | -3 | 4.43 | 0.72 |
| -3 | -13 | -3 | 5.55 | 0.95 |
| 3  | -13 | 3  | 6.82 | 1.03 |
| -3 | -13 | -3 | 5.09 | 0.91 |
| -3 | 13  | 3  | 4.35 | 1.31 |
| -3 | -13 | -3 | 2.43 | 0.74 |
| -3 | -13 | -3 | 5.84 | 1.07 |
| -3 | -13 | 3  | 6.28 | 0.84 |
| -3 | -13 | 3  | 4.90 | 0.82 |
| -3 | -13 | 3  | 5.64 | 1.02 |
| -3 | -13 | 3  | 3.64 | 1.00 |
| -3 | -13 | 3  | 5.05 | 0.74 |
| -4 | -13 | -3 | 0.82 | 0.45 |
| -4 | -13 | -3 | 0.89 | 0.60 |
| -4 | 13  | 3  | 1.32 | 0.70 |
| -4 | -13 | -3 | 0.77 | 0.56 |
| -4 | -13 | -3 | 0.84 | 0.67 |
| -4 | 13  | 3  | 1.75 | 0.81 |
| -4 | -13 | -3 | 0.12 | 0.53 |
| -4 | -13 | -3 | 0.92 | 0.55 |
| -4 | 13  | 3  | 1.22 | 0.29 |
| -4 | -13 | 3  | 1.99 | 0.57 |
| -4 | -13 | 3  | 0.61 | 0.44 |
| -4 | -13 | 3  | 2.11 | 0.64 |
| -4 | -13 | 3  | 1.03 | 0.49 |
| -5 | -13 | -3 | 0.76 | 0.39 |
| -5 | 13  | 3  | 2.13 | 0.59 |
| -5 | -13 | -3 | 1.86 | 0.48 |
| -5 | -13 | -3 | 1.74 | 0.47 |
| -5 | 13  | 3  | 1.98 | 0.58 |
| -5 | 13  | 3  | 2.80 | 0.57 |
| -5 | -13 | -3 | 1.92 | 0.52 |
| -5 | 13  | 3  | 1.45 | 0.53 |
| -5 | 13  | -3 | 2.01 | 0.72 |
| -5 | -13 | 3  | 1.94 | 0.46 |
| -5 | -13 | 3  | 1.46 | 0.47 |
| -5 | -13 | 3  | 1.42 | 0.37 |
| -5 | 13  | -3 | 1.87 | 0.44 |
| 0  | -14 | 3  | 1.72 | 0.73 |
| 0  | -14 | -3 | 0.96 | 0.81 |
| 0  | -14 | 3  | 0.65 | 0.62 |



## CIF S3

|    |     |    |       |      |
|----|-----|----|-------|------|
| 0  | -14 | 3  | 1.77  | 0.66 |
| 0  | -14 | 3  | 3.32  | 1.14 |
| 0  | -14 | 3  | 4.08  | 1.02 |
| 0  | -14 | -3 | 1.57  | 0.83 |
| 0  | -14 | 3  | 3.57  | 0.91 |
| -1 | -14 | -3 | 1.18  | 0.68 |
| 1  | -14 | 3  | 1.23  | 0.64 |
| -1 | -14 | -3 | 1.60  | 0.86 |
| 1  | -14 | 3  | 1.05  | 0.75 |
| 1  | -14 | 3  | 1.71  | 0.63 |
| -1 | -14 | -3 | 3.67  | 0.89 |
| 1  | -14 | 3  | 2.16  | 0.79 |
| -1 | -14 | -3 | 2.37  | 0.68 |
| 1  | -14 | 3  | 1.63  | 0.79 |
| -1 | -14 | -3 | 1.30  | 0.69 |
| -1 | -14 | 3  | 2.68  | 0.74 |
| -1 | -14 | 3  | 3.50  | 0.97 |
| -1 | -14 | 3  | 1.66  | 0.76 |
| -1 | -14 | 3  | 0.98  | 0.43 |
| -1 | -14 | 3  | 1.40  | 0.92 |
| -1 | -14 | 3  | 3.15  | 0.80 |
| -1 | -14 | 3  | 1.23  | 0.59 |
| -1 | -14 | 3  | 1.90  | 1.01 |
| 1  | -14 | -3 | 2.27  | 0.95 |
| -2 | -14 | -3 | 1.19  | 0.67 |
| -2 | -14 | -3 | 1.42  | 0.51 |
| 2  | -14 | 3  | 1.23  | 0.73 |
| -2 | -14 | -3 | 1.24  | 0.69 |
| 2  | -14 | 3  | 1.62  | 0.78 |
| -2 | -14 | -3 | 2.66  | 0.80 |
| -2 | -14 | -3 | 0.75  | 0.39 |
| -2 | -14 | 3  | 2.45  | 0.62 |
| -2 | -14 | 3  | 1.37  | 0.77 |
| -2 | -14 | 3  | 1.12  | 0.67 |
| 2  | -14 | -3 | 1.25  | 0.81 |
| -2 | -14 | 3  | 2.94  | 0.77 |
| -2 | -14 | 3  | 2.24  | 0.55 |
| -2 | -14 | 3  | 1.38  | 0.56 |
| -2 | -14 | 3  | 0.94  | 0.48 |
| -3 | -14 | -3 | -0.10 | 0.53 |
| -3 | 14  | 3  | 0.06  | 0.71 |

## CIF S3

|    |     |    |       |      |
|----|-----|----|-------|------|
| -3 | -14 | -3 | -0.12 | 0.55 |
| 3  | -14 | 3  | 0.44  | 0.64 |
| -3 | -14 | -3 | -0.22 | 0.37 |
| -3 | -14 | -3 | 0.30  | 0.84 |
| -3 | -14 | -3 | 1.44  | 0.57 |
| -3 | 14  | 3  | 0.17  | 0.34 |
| -3 | -14 | 3  | 0.30  | 0.46 |
| -3 | -14 | 3  | -0.17 | 0.48 |
| -3 | -14 | 3  | 0.15  | 0.42 |
| -3 | -14 | 3  | 0.11  | 0.44 |
| -4 | 14  | 3  | 2.94  | 0.81 |
| -4 | -14 | -3 | 2.29  | 0.59 |
| -4 | -14 | -3 | 2.23  | 0.47 |
| -4 | -14 | -3 | 2.46  | 0.91 |
| -4 | -14 | -3 | 1.74  | 0.44 |
| -4 | 14  | -3 | 2.90  | 0.41 |
| -4 | -14 | 3  | 2.57  | 0.45 |
| -4 | -14 | 3  | 2.73  | 0.58 |
| -4 | -14 | 3  | 2.42  | 0.56 |
| 0  | -15 | 3  | -0.07 | 0.52 |
| 0  | -15 | 3  | 0.33  | 0.56 |
| 0  | -15 | -3 | 0.78  | 0.59 |
| 0  | -15 | 3  | 0.58  | 0.46 |
| 0  | -15 | -3 | 0.20  | 0.60 |
| -1 | -15 | -3 | 0.08  | 0.57 |
| 1  | -15 | 3  | 0.20  | 0.54 |
| -1 | -15 | -3 | 0.30  | 0.57 |
| 1  | -15 | 3  | 0.52  | 0.45 |
| 1  | -15 | 3  | 0.07  | 0.53 |
| -1 | -15 | -3 | 0.34  | 0.49 |
| 1  | -15 | -3 | 0.27  | 0.59 |
| -1 | -15 | 3  | -0.01 | 0.43 |
| -1 | -15 | 3  | 0.64  | 0.44 |
| -1 | -15 | 3  | 0.73  | 0.44 |
| -1 | -15 | 3  | 0.19  | 0.27 |
| -1 | -15 | 3  | 0.42  | 0.52 |
| 1  | -15 | -3 | 0.51  | 0.58 |
| 2  | -15 | 3  | 0.42  | 0.46 |
| -2 | 15  | 3  | 0.25  | 0.28 |
| -2 | -15 | -3 | -0.01 | 0.44 |
| 2  | -15 | 3  | 0.30  | 0.52 |

## CIF S3

|    |     |    |        |       |
|----|-----|----|--------|-------|
| -2 | -15 | -3 | 0.20   | 0.60  |
| -2 | -15 | -3 | 0.19   | 0.51  |
| 2  | -15 | -3 | 0.47   | 0.55  |
| -2 | -15 | 3  | 0.95   | 0.41  |
| -2 | -15 | 3  | -0.09  | 0.40  |
| -2 | -15 | 3  | 0.78   | 0.34  |
| -2 | -15 | 3  | 0.34   | 0.31  |
| 0  | 0   | -4 | 0.20   | 0.50  |
| 0  | 0   | 4  | -0.18  | 0.43  |
| 0  | 0   | 4  | 0.33   | 0.57  |
| 0  | 0   | -4 | -0.22  | 0.54  |
| 0  | 0   | 4  | 0.20   | 0.41  |
| 0  | 0   | 4  | 0.16   | 0.58  |
| -1 | 0   | -4 | 495.84 | 25.70 |
| 1  | 0   | 4  | 525.44 | 25.67 |
| -1 | 0   | 4  | 503.39 | 25.50 |
| 1  | 0   | -4 | 551.54 | 25.56 |
| 1  | 0   | 4  | 509.44 | 25.70 |
| 1  | 0   | -4 | 531.82 | 25.43 |
| -1 | 0   | 4  | 534.11 | 25.52 |
| -1 | 0   | -4 | 529.24 | 25.62 |
| -1 | 0   | -4 | 530.21 | 25.60 |
| -1 | 0   | -4 | 537.73 | 25.67 |
| 1  | 0   | 4  | 527.39 | 25.63 |
| 1  | 0   | -4 | 552.46 | 25.56 |
| -1 | 0   | -4 | 525.49 | 25.62 |
| -1 | 0   | 4  | 511.15 | 25.54 |
| 1  | 0   | -4 | 491.69 | 25.58 |
| -2 | 0   | -4 | 697.39 | 34.19 |
| 2  | 0   | 4  | 707.33 | 34.21 |
| -2 | 0   | -4 | 697.06 | 34.18 |
| -2 | 0   | -4 | 660.04 | 34.10 |
| -2 | 0   | -4 | 694.12 | 34.36 |
| -2 | 0   | 4  | 721.71 | 33.95 |
| 2  | 0   | -4 | 702.26 | 33.96 |
| -2 | 0   | 4  | 708.80 | 33.94 |
| 2  | 0   | 4  | 696.98 | 34.26 |
| -3 | 0   | -4 | 237.73 | 11.81 |
| 3  | 0   | 4  | 240.86 | 12.18 |
| 3  | 0   | 4  | 240.86 | 11.77 |
| 3  | 0   | 4  | 249.75 | 12.12 |

## CIF S3

|    |   |    |        |       |
|----|---|----|--------|-------|
| -3 | 0 | 4  | 246.67 | 11.72 |
| -3 | 0 | -4 | 234.69 | 11.98 |
| -3 | 0 | -4 | 229.05 | 12.03 |
| -3 | 0 | 4  | 242.57 | 11.72 |
| -3 | 0 | 4  | 238.26 | 11.66 |
| 4  | 0 | 4  | 76.13  | 4.13  |
| 4  | 0 | 4  | 72.18  | 3.66  |
| -4 | 0 | 4  | 72.69  | 3.48  |
| -4 | 0 | -4 | 70.18  | 3.63  |
| 4  | 0 | 4  | 68.45  | 4.21  |
| -4 | 0 | 4  | 69.63  | 3.55  |
| -4 | 0 | 4  | 71.07  | 3.55  |
| -4 | 0 | -4 | 71.78  | 3.77  |
| 5  | 0 | 4  | 8.33   | 1.62  |
| -5 | 0 | -4 | 10.93  | 1.13  |
| 5  | 0 | -4 | 11.16  | 0.62  |
| -5 | 0 | -4 | 10.37  | 0.74  |
| 5  | 0 | -4 | 10.74  | 0.63  |
| -5 | 0 | -4 | 10.78  | 0.87  |
| 5  | 0 | 4  | 11.96  | 0.91  |
| -5 | 0 | 4  | 10.51  | 0.59  |
| -6 | 0 | -4 | 0.27   | 0.37  |
| 6  | 0 | 4  | -0.08  | 0.52  |
| 6  | 0 | -4 | 0.50   | 0.26  |
| -6 | 0 | 4  | 0.27   | 0.22  |
| -6 | 0 | -4 | 0.05   | 0.67  |
| -7 | 0 | 4  | 17.52  | 0.95  |
| -7 | 0 | -4 | 16.02  | 1.39  |
| 7  | 0 | 4  | 16.60  | 1.26  |
| -7 | 0 | -4 | 16.21  | 1.09  |
| -7 | 0 | -4 | 16.80  | 1.12  |
| -8 | 0 | 4  | 1.95   | 0.33  |
| -8 | 0 | -4 | 1.19   | 0.69  |
| -8 | 0 | 4  | 2.81   | 0.38  |
| -8 | 0 | -4 | 2.78   | 0.76  |
| -8 | 0 | 4  | 2.75   | 0.44  |
| -8 | 0 | -4 | 1.36   | 0.42  |
| -8 | 0 | -4 | 1.67   | 0.46  |
| -8 | 0 | -4 | 3.13   | 0.74  |
| -8 | 0 | -4 | 1.45   | 0.51  |
| -8 | 0 | -4 | -0.45  | 1.08  |

## CIF S3

|     |    |    |        |       |
|-----|----|----|--------|-------|
| -8  | 0  | -4 | 1.36   | 0.54  |
| -8  | 0  | -4 | 2.54   | 0.52  |
| -9  | 0  | -4 | 0.63   | 0.49  |
| -9  | 0  | 4  | 0.46   | 0.16  |
| -9  | 0  | -4 | 0.37   | 0.35  |
| -9  | 0  | -4 | 0.39   | 0.52  |
| -9  | 0  | -4 | 0.53   | 0.87  |
| -9  | 0  | -4 | -0.12  | 0.42  |
| -9  | 0  | -4 | 0.19   | 0.39  |
| -9  | 0  | 4  | 0.19   | 0.15  |
| -9  | 0  | -4 | 0.04   | 0.58  |
| -10 | 0  | -4 | 3.88   | 0.58  |
| -10 | 0  | -4 | 2.77   | 0.42  |
| -10 | 0  | -4 | 2.48   | 0.55  |
| 0   | 1  | -4 | 271.49 | 13.90 |
| 0   | 1  | 4  | 322.98 | 14.02 |
| 0   | -1 | 4  | 270.90 | 13.89 |
| 0   | -1 | 4  | 258.11 | 13.85 |
| 0   | 1  | 4  | 279.61 | 13.95 |
| 0   | 1  | -4 | 252.45 | 13.88 |
| 0   | 1  | -4 | 290.34 | 13.87 |
| 0   | -1 | -4 | 291.79 | 13.92 |
| 0   | -1 | -4 | 291.92 | 13.94 |
| 0   | 1  | 4  | 288.78 | 13.89 |
| 0   | -1 | 4  | 284.60 | 13.85 |
| 0   | 1  | 4  | 290.81 | 13.95 |
| 0   | -1 | 4  | 273.96 | 13.89 |
| -1  | -1 | -4 | 74.26  | 4.07  |
| -1  | 1  | 4  | 84.62  | 3.92  |
| -1  | -1 | -4 | 79.59  | 4.08  |
| 1   | 1  | -4 | 76.65  | 3.92  |
| 1   | -1 | 4  | 77.07  | 4.06  |
| -1  | 1  | 4  | 75.01  | 3.94  |
| -1  | -1 | -4 | 72.81  | 4.02  |
| 1   | -1 | 4  | 73.56  | 4.06  |
| -1  | 1  | 4  | 72.22  | 3.89  |
| -1  | 1  | 4  | 72.19  | 3.96  |
| 1   | -1 | 4  | 77.28  | 4.03  |
| 1   | 1  | -4 | 78.08  | 3.90  |
| 1   | 1  | -4 | 76.35  | 3.90  |
| -1  | 1  | -4 | 77.32  | 4.08  |

## CIF S3

|    |    |    |       |      |
|----|----|----|-------|------|
| 1  | 1  | 4  | 90.17 | 4.25 |
| 1  | -1 | -4 | 78.91 | 3.99 |
| 1  | -1 | -4 | 71.50 | 3.79 |
| -1 | 1  | -4 | 80.42 | 4.08 |
| -1 | 1  | -4 | 73.39 | 4.01 |
| 1  | 1  | 4  | 75.08 | 4.08 |
| -1 | -1 | 4  | 74.30 | 3.86 |
| -1 | -1 | 4  | 77.45 | 3.88 |
| 1  | 1  | 4  | 73.89 | 4.15 |
| -1 | 1  | -4 | 77.15 | 4.00 |
| 1  | 1  | 4  | 76.19 | 4.04 |
| -2 | -1 | -4 | 27.46 | 1.68 |
| -2 | 1  | 4  | 22.84 | 1.38 |
| -2 | -1 | -4 | 25.21 | 1.59 |
| 2  | -1 | 4  | 27.21 | 1.84 |
| 2  | -1 | 4  | 24.48 | 1.76 |
| -2 | -1 | -4 | 24.82 | 1.68 |
| -2 | 1  | 4  | 25.40 | 1.41 |
| -2 | -1 | 4  | 24.55 | 1.29 |
| -2 | -1 | 4  | 23.75 | 1.29 |
| 2  | -1 | -4 | 23.06 | 1.47 |
| 2  | -1 | -4 | 21.49 | 1.23 |
| 2  | -1 | -4 | 22.77 | 1.25 |
| 2  | 1  | 4  | 25.64 | 1.88 |
| -2 | 1  | -4 | 25.02 | 1.64 |
| -2 | 1  | -4 | 24.81 | 2.12 |
| 2  | -1 | -4 | 22.91 | 1.32 |
| -2 | 1  | -4 | 24.65 | 1.73 |
| 2  | 1  | 4  | 25.05 | 1.76 |
| -2 | 1  | -4 | 21.50 | 1.62 |
| -3 | -1 | -4 | 44.60 | 2.58 |
| -3 | 1  | 4  | 42.20 | 2.34 |
| -3 | -1 | -4 | 45.59 | 2.62 |
| -3 | -1 | -4 | 41.06 | 2.40 |
| 3  | -1 | 4  | 41.25 | 2.76 |
| -3 | 1  | 4  | 43.72 | 2.24 |
| 3  | -1 | 4  | 43.65 | 2.31 |
| 3  | -1 | 4  | 44.84 | 2.70 |
| -3 | 1  | 4  | 45.74 | 2.33 |
| 3  | 1  | 4  | 46.05 | 2.71 |
| 3  | -1 | -4 | 46.93 | 2.27 |

## CIF S3

|    |    |    |       |      |
|----|----|----|-------|------|
| 3  | -1 | -4 | 43.78 | 2.18 |
| 3  | 1  | 4  | 41.62 | 2.78 |
| -3 | 1  | -4 | 44.04 | 2.65 |
| 3  | -1 | -4 | 44.38 | 2.27 |
| -3 | 1  | -4 | 42.42 | 2.37 |
| 3  | 1  | 4  | 43.81 | 2.29 |
| 4  | -1 | 4  | 40.09 | 2.72 |
| -4 | 1  | 4  | 40.87 | 2.17 |
| 4  | -1 | 4  | 38.65 | 2.63 |
| -4 | -1 | -4 | 36.62 | 2.13 |
| -4 | 1  | 4  | 39.71 | 1.97 |
| 4  | -1 | 4  | 39.85 | 2.18 |
| -4 | -1 | -4 | 38.23 | 2.27 |
| -4 | 1  | 4  | 41.01 | 2.05 |
| -4 | 1  | -4 | 38.31 | 2.26 |
| 4  | -1 | -4 | 41.87 | 2.12 |
| -4 | 1  | -4 | 36.72 | 2.08 |
| 4  | 1  | 4  | 42.39 | 2.77 |
| -4 | 1  | -4 | 38.11 | 2.13 |
| 4  | -1 | -4 | 45.05 | 2.09 |
| 4  | -1 | -4 | 39.45 | 2.01 |
| 4  | 1  | 4  | 39.02 | 2.57 |
| 4  | 1  | 4  | 39.20 | 2.13 |
| -5 | -1 | -4 | 34.83 | 1.96 |
| -5 | 1  | 4  | 36.42 | 1.90 |
| -5 | 1  | 4  | 37.31 | 1.89 |
| 5  | -1 | 4  | 40.14 | 2.12 |
| -5 | -1 | -4 | 36.67 | 2.14 |
| -5 | 1  | 4  | 38.27 | 1.87 |
| 5  | 1  | 4  | 41.09 | 2.09 |
| -5 | 1  | -4 | 36.32 | 2.20 |
| -5 | 1  | -4 | 35.66 | 2.00 |
| 5  | -1 | -4 | 39.52 | 2.04 |
| -5 | 1  | -4 | 37.48 | 1.96 |
| -5 | 1  | -4 | 38.03 | 2.04 |
| -5 | -1 | 4  | 34.95 | 1.84 |
| -5 | -1 | 4  | 37.61 | 1.83 |
| 5  | -1 | -4 | 36.85 | 1.92 |
| -6 | -1 | -4 | 8.75  | 0.74 |
| -6 | 1  | 4  | 8.63  | 0.68 |
| 6  | -1 | 4  | 9.84  | 0.93 |

## CIF S3

|    |    |    |       |      |
|----|----|----|-------|------|
| 6  | 1  | -4 | 7.63  | 0.58 |
| -6 | -1 | -4 | 8.49  | 1.03 |
| -6 | 1  | 4  | 8.98  | 0.62 |
| -6 | 1  | -4 | 8.96  | 0.74 |
| 6  | -1 | -4 | 9.48  | 0.84 |
| -6 | -1 | 4  | 9.12  | 0.54 |
| -6 | 1  | -4 | 10.66 | 1.24 |
| 6  | -1 | -4 | 9.94  | 0.69 |
| 6  | 1  | 4  | 9.70  | 0.89 |
| -7 | -1 | -4 | 5.07  | 0.99 |
| -7 | 1  | 4  | 7.04  | 0.60 |
| -7 | 1  | 4  | 6.69  | 0.64 |
| -7 | -1 | -4 | 7.24  | 0.76 |
| -7 | -1 | -4 | 6.34  | 0.78 |
| -7 | -1 | -4 | 6.98  | 0.73 |
| -7 | -1 | -4 | 6.78  | 0.75 |
| 7  | -1 | 4  | 7.01  | 0.90 |
| -7 | -1 | 4  | 7.52  | 0.50 |
| -7 | 1  | -4 | 8.78  | 1.09 |
| -7 | 1  | -4 | 6.55  | 0.83 |
| 7  | 1  | 4  | 6.68  | 0.88 |
| -7 | 1  | -4 | 6.73  | 0.79 |
| -8 | -1 | -4 | 2.32  | 0.57 |
| -8 | -1 | -4 | 2.55  | 0.70 |
| -8 | 1  | 4  | 2.54  | 0.64 |
| -8 | 1  | 4  | 1.74  | 0.29 |
| -8 | -1 | -4 | 1.09  | 0.51 |
| -8 | -1 | -4 | 2.14  | 0.92 |
| -8 | 1  | 4  | 1.74  | 0.46 |
| -8 | -1 | -4 | 1.02  | 0.66 |
| -8 | 1  | 4  | 1.79  | 0.39 |
| -8 | -1 | -4 | 2.23  | 0.50 |
| -8 | -1 | -4 | 2.84  | 0.73 |
| -8 | -1 | -4 | 1.91  | 0.54 |
| -8 | -1 | 4  | 1.76  | 0.29 |
| -8 | 1  | -4 | 1.68  | 0.47 |
| -8 | 1  | -4 | 1.99  | 0.82 |
| -8 | -1 | 4  | 1.01  | 0.27 |
| -8 | 1  | -4 | 1.61  | 0.46 |
| -8 | 1  | -4 | 1.81  | 0.63 |
| -8 | 1  | -4 | 1.34  | 0.48 |



## CIF S3

|     |    |    |        |      |
|-----|----|----|--------|------|
| -8  | 1  | -4 | 1.12   | 0.47 |
| -8  | 1  | -4 | 1.63   | 0.65 |
| -8  | 1  | -4 | 1.87   | 0.56 |
| -8  | -1 | 4  | 2.07   | 0.40 |
| -9  | 1  | 4  | 12.30  | 0.70 |
| -9  | 1  | 4  | 11.79  | 0.70 |
| -9  | -1 | -4 | 12.09  | 0.85 |
| -9  | -1 | -4 | 12.61  | 0.87 |
| -9  | -1 | -4 | 12.78  | 0.98 |
| -9  | 1  | 4  | 12.27  | 0.69 |
| -9  | -1 | -4 | 13.33  | 0.92 |
| -9  | 1  | 4  | 12.54  | 1.01 |
| -9  | -1 | -4 | 11.38  | 1.33 |
| -9  | -1 | -4 | 12.64  | 1.02 |
| -9  | -1 | -4 | 12.44  | 0.87 |
| -9  | 1  | -4 | 11.92  | 0.92 |
| -9  | 1  | -4 | 10.32  | 0.98 |
| -9  | 1  | -4 | 11.77  | 1.07 |
| -9  | 1  | -4 | 11.43  | 0.94 |
| -9  | 1  | -4 | 14.25  | 1.01 |
| -9  | 1  | -4 | 11.27  | 1.75 |
| -10 | -1 | -4 | 4.37   | 0.48 |
| -10 | 1  | 4  | 4.44   | 0.67 |
| -10 | -1 | -4 | 4.54   | 0.40 |
| -10 | 1  | -4 | 3.82   | 0.51 |
| -10 | 1  | -4 | 3.81   | 0.59 |
| -10 | 1  | -4 | 3.42   | 0.57 |
| 0   | -2 | 4  | 40.84  | 2.35 |
| 0   | -2 | 4  | 43.45  | 2.40 |
| 0   | -2 | -4 | 42.51  | 2.45 |
| 0   | 2  | -4 | 43.30  | 2.38 |
| 0   | 2  | 4  | 45.27  | 2.52 |
| 0   | 2  | 4  | 43.18  | 2.56 |
| 0   | -2 | -4 | 45.72  | 2.53 |
| 0   | 2  | -4 | 41.13  | 2.44 |
| 0   | -2 | 4  | 41.85  | 2.40 |
| 0   | 2  | 4  | 43.79  | 2.45 |
| 0   | 2  | -4 | 40.63  | 2.38 |
| 0   | -2 | 4  | 42.91  | 2.43 |
| 0   | 2  | 4  | 42.75  | 2.58 |
| -1  | -2 | -4 | 109.78 | 5.61 |

## CIF S3

|    |    |    |        |      |
|----|----|----|--------|------|
| 1  | -2 | 4  | 104.36 | 5.59 |
| -1 | 2  | 4  | 115.10 | 5.61 |
| -1 | -2 | -4 | 109.76 | 5.65 |
| -1 | 2  | 4  | 111.71 | 5.52 |
| 1  | 2  | -4 | 105.80 | 5.46 |
| -1 | 2  | 4  | 114.20 | 5.61 |
| 1  | 2  | -4 | 108.20 | 5.50 |
| 1  | -2 | 4  | 106.10 | 5.64 |
| -1 | 2  | 4  | 111.56 | 5.59 |
| 1  | 2  | -4 | 113.42 | 5.46 |
| 1  | -2 | 4  | 108.31 | 5.63 |
| -1 | -2 | -4 | 114.25 | 5.64 |
| -1 | -2 | -4 | 100.15 | 5.55 |
| 1  | -2 | -4 | 115.87 | 5.59 |
| 1  | -2 | -4 | 98.22  | 5.44 |
| -1 | -2 | 4  | 104.65 | 5.56 |
| 1  | 2  | 4  | 111.83 | 5.74 |
| -1 | -2 | 4  | 110.40 | 5.45 |
| -1 | 2  | -4 | 102.63 | 5.64 |
| -1 | -2 | 4  | 110.03 | 5.46 |
| 1  | -2 | -4 | 109.56 | 5.49 |
| 1  | 2  | 4  | 110.70 | 5.69 |
| 1  | -2 | -4 | 108.82 | 5.38 |
| -1 | 2  | -4 | 105.39 | 5.59 |
| -1 | 2  | -4 | 104.70 | 5.61 |
| 2  | -2 | 4  | 40.34  | 2.60 |
| -2 | 2  | 4  | 40.36  | 2.28 |
| -2 | -2 | -4 | 38.23  | 2.42 |
| -2 | 2  | 4  | 44.64  | 2.26 |
| -2 | -2 | -4 | 39.46  | 2.43 |
| 2  | 2  | -4 | 39.54  | 2.11 |
| 2  | -2 | 4  | 39.58  | 2.49 |
| -2 | -2 | -4 | 40.89  | 2.48 |
| -2 | -2 | -4 | 41.09  | 2.52 |
| 2  | -2 | -4 | 40.12  | 2.37 |
| 2  | 2  | 4  | 41.12  | 2.51 |
| -2 | -2 | 4  | 39.95  | 2.14 |
| -2 | 2  | -4 | 36.74  | 2.28 |
| 2  | 2  | 4  | 44.11  | 2.68 |
| 2  | -2 | -4 | 44.89  | 2.22 |
| 2  | -2 | -4 | 42.19  | 2.12 |

## CIF S3

|    |    |    |       |      |
|----|----|----|-------|------|
| -2 | 2  | -4 | 41.79 | 2.54 |
| 2  | -2 | -4 | 38.94 | 2.09 |
| -2 | -2 | 4  | 46.21 | 2.62 |
| -2 | 2  | -4 | 41.28 | 2.49 |
| -2 | -2 | 4  | 42.26 | 2.14 |
| -3 | -2 | -4 | 10.81 | 1.12 |
| -3 | 2  | 4  | 12.36 | 0.89 |
| 3  | -2 | 4  | 11.76 | 0.88 |
| -3 | 2  | 4  | 11.14 | 1.00 |
| -3 | -2 | -4 | 10.81 | 1.17 |
| 3  | -2 | 4  | 11.20 | 1.44 |
| 3  | -2 | 4  | 12.62 | 1.45 |
| -3 | 2  | -4 | 9.48  | 1.27 |
| -3 | 2  | -4 | 11.09 | 0.98 |
| -3 | 2  | -4 | 13.09 | 1.68 |
| 3  | 2  | 4  | 12.01 | 1.35 |
| 3  | 2  | 4  | 11.71 | 1.50 |
| 3  | -2 | -4 | 12.88 | 0.93 |
| 3  | 2  | 4  | 11.42 | 0.85 |
| 3  | -2 | -4 | 13.02 | 0.97 |
| 3  | -2 | -4 | 11.39 | 0.76 |
| 4  | -2 | 4  | 2.36  | 0.92 |
| -4 | -2 | -4 | 2.52  | 0.63 |
| 4  | -2 | 4  | 3.16  | 1.29 |
| 4  | -2 | 4  | 3.00  | 0.62 |
| -4 | 2  | 4  | 2.54  | 0.65 |
| -4 | 2  | 4  | 1.83  | 0.37 |
| -4 | 2  | 4  | 3.35  | 0.76 |
| 4  | -2 | -4 | 2.81  | 0.73 |
| -4 | 2  | -4 | 3.15  | 0.78 |
| 4  | 2  | 4  | 2.03  | 0.58 |
| -4 | 2  | -4 | 2.24  | 0.68 |
| 4  | -2 | -4 | 2.92  | 0.64 |
| 4  | 2  | 4  | 3.36  | 1.03 |
| -4 | 2  | -4 | 2.53  | 0.52 |
| 4  | -2 | -4 | 1.95  | 0.48 |
| 4  | 2  | 4  | 2.96  | 1.25 |
| -5 | 2  | 4  | 5.24  | 0.69 |
| 5  | -2 | 4  | 5.35  | 0.81 |
| 5  | -2 | 4  | 8.38  | 1.45 |
| -5 | 2  | 4  | 4.92  | 0.49 |

## CIF S3

|    |    |    |       |      |
|----|----|----|-------|------|
| -5 | -2 | -4 | 5.25  | 0.83 |
| -5 | -2 | -4 | 5.40  | 0.63 |
| -5 | -2 | -4 | 6.06  | 0.65 |
| -5 | 2  | 4  | 5.76  | 0.57 |
| -5 | 2  | -4 | 5.45  | 0.63 |
| 5  | 2  | 4  | 5.37  | 0.71 |
| -5 | 2  | -4 | 5.62  | 0.95 |
| 5  | -2 | -4 | 5.94  | 0.71 |
| 5  | -2 | -4 | 6.02  | 0.76 |
| 5  | -2 | -4 | 4.79  | 0.57 |
| -5 | 2  | -4 | 5.77  | 0.65 |
| -5 | 2  | -4 | 4.99  | 0.72 |
| -5 | -2 | 4  | 5.13  | 0.30 |
| -6 | 2  | 4  | 24.63 | 1.36 |
| -6 | -2 | -4 | 22.02 | 1.57 |
| -6 | 2  | 4  | 23.83 | 1.33 |
| -6 | -2 | -4 | 25.44 | 1.40 |
| -6 | -2 | -4 | 24.34 | 1.37 |
| 6  | -2 | 4  | 23.40 | 1.58 |
| -6 | -2 | -4 | 24.25 | 1.59 |
| -6 | 2  | 4  | 24.71 | 1.32 |
| 6  | 2  | -4 | 23.93 | 1.25 |
| 6  | -2 | -4 | 23.96 | 1.40 |
| 6  | -2 | -4 | 24.47 | 1.58 |
| -6 | 2  | -4 | 23.48 | 1.41 |
| -6 | -2 | 4  | 25.31 | 1.22 |
| 6  | 2  | 4  | 23.32 | 1.53 |
| -7 | -2 | -4 | 2.63  | 0.53 |
| 7  | -2 | 4  | 2.38  | 0.76 |
| -7 | -2 | -4 | 1.31  | 0.74 |
| -7 | -2 | -4 | 2.46  | 0.65 |
| -7 | -2 | -4 | 3.01  | 0.66 |
| -7 | 2  | 4  | 2.61  | 0.51 |
| -7 | 2  | 4  | 2.98  | 0.61 |
| -7 | -2 | -4 | 2.72  | 0.59 |
| -7 | 2  | -4 | 2.69  | 0.64 |
| 7  | 2  | 4  | 2.03  | 0.66 |
| -7 | 2  | -4 | 2.52  | 0.67 |
| -7 | -2 | 4  | 2.87  | 0.35 |
| -8 | -2 | -4 | 8.50  | 0.99 |
| -8 | -2 | -4 | 10.12 | 0.86 |

## CIF S3

|     |    |    |       |      |
|-----|----|----|-------|------|
| -8  | 2  | 4  | 9.86  | 0.75 |
| -8  | 2  | 4  | 9.54  | 1.01 |
| -8  | -2 | -4 | 9.72  | 0.89 |
| -8  | -2 | -4 | 10.05 | 0.88 |
| -8  | 2  | 4  | 9.32  | 0.69 |
| -8  | -2 | -4 | 10.60 | 1.43 |
| -8  | 2  | 4  | 9.39  | 0.61 |
| -8  | -2 | -4 | 9.27  | 0.79 |
| -8  | 2  | 4  | 10.55 | 0.77 |
| -8  | 2  | -4 | 10.27 | 0.88 |
| -8  | 2  | -4 | 10.39 | 0.86 |
| -8  | -2 | 4  | 9.22  | 0.59 |
| -8  | 2  | -4 | 8.94  | 0.97 |
| -8  | 2  | -4 | 8.94  | 0.85 |
| -8  | -2 | 4  | 9.41  | 0.50 |
| -8  | 2  | -4 | 9.88  | 0.92 |
| -8  | 2  | -4 | 9.03  | 0.93 |
| -8  | -2 | 4  | 9.44  | 0.52 |
| -8  | 2  | -4 | 7.71  | 0.93 |
| -9  | -2 | -4 | 0.37  | 0.37 |
| -9  | 2  | 4  | 0.18  | 0.26 |
| -9  | -2 | -4 | 0.54  | 0.40 |
| -9  | 2  | 4  | 0.16  | 0.51 |
| -9  | -2 | -4 | 0.38  | 0.33 |
| -9  | 2  | 4  | 0.34  | 0.25 |
| -9  | -2 | -4 | 0.78  | 0.57 |
| -9  | -2 | -4 | -0.04 | 0.49 |
| -9  | 2  | -4 | 0.42  | 0.46 |
| -9  | 2  | -4 | -0.86 | 0.54 |
| -9  | 2  | -4 | 0.32  | 0.39 |
| -9  | 2  | -4 | 0.64  | 0.48 |
| -9  | 2  | -4 | 1.12  | 0.67 |
| -9  | 2  | -4 | -0.16 | 0.43 |
| -10 | 2  | 4  | 0.97  | 0.43 |
| -10 | -2 | -4 | 0.90  | 0.28 |
| -10 | 2  | -4 | 0.80  | 0.35 |
| -10 | 2  | -4 | 1.15  | 0.24 |
| -10 | 2  | -4 | 1.32  | 0.35 |
| -10 | 2  | -4 | 2.16  | 0.59 |
| -10 | 2  | -4 | 0.86  | 0.32 |
| 0   | 3  | -4 | 61.86 | 3.47 |

## CIF S3

|    |    |    |        |      |
|----|----|----|--------|------|
| 0  | -3 | -4 | 63.07  | 3.53 |
| 0  | 3  | -4 | 62.22  | 3.45 |
| 0  | 3  | -4 | 61.00  | 3.29 |
| 0  | -3 | 4  | 68.19  | 3.55 |
| 0  | -3 | 4  | 65.58  | 3.46 |
| 0  | 3  | 4  | 58.40  | 3.61 |
| 0  | -3 | 4  | 66.05  | 3.49 |
| 0  | -3 | -4 | 68.32  | 3.62 |
| 0  | 3  | -4 | 67.30  | 3.55 |
| 0  | 3  | 4  | 70.40  | 3.62 |
| 1  | -3 | 4  | 154.93 | 7.95 |
| -1 | -3 | -4 | 151.28 | 7.92 |
| -1 | 3  | 4  | 167.31 | 8.00 |
| -1 | 3  | 4  | 144.35 | 7.93 |
| 1  | 3  | -4 | 152.83 | 7.83 |
| -1 | 3  | 4  | 156.15 | 7.82 |
| 1  | 3  | -4 | 161.57 | 7.79 |
| 1  | 3  | -4 | 137.09 | 7.62 |
| 1  | 3  | -4 | 152.24 | 7.76 |
| -1 | -3 | -4 | 160.21 | 7.95 |
| -1 | 3  | 4  | 149.49 | 7.91 |
| 1  | -3 | 4  | 164.31 | 8.00 |
| 1  | -3 | -4 | 144.41 | 7.66 |
| -1 | -3 | 4  | 160.03 | 7.77 |
| 1  | -3 | -4 | 145.73 | 7.78 |
| 1  | -3 | -4 | 157.22 | 7.74 |
| -1 | 3  | -4 | 160.19 | 7.91 |
| -1 | 3  | -4 | 162.39 | 7.95 |
| -1 | 3  | -4 | 159.27 | 7.91 |
| -1 | 3  | -4 | 148.98 | 7.72 |
| 1  | 3  | 4  | 166.47 | 8.07 |
| 1  | -3 | -4 | 164.53 | 7.92 |
| -1 | -3 | 4  | 158.32 | 7.87 |
| 1  | 3  | 4  | 154.21 | 7.97 |
| -2 | -3 | -4 | 34.67  | 2.33 |
| 2  | 3  | -4 | 36.29  | 1.96 |
| 2  | 3  | -4 | 36.26  | 1.98 |
| -2 | 3  | 4  | 36.12  | 2.13 |
| 2  | -3 | 4  | 36.86  | 2.40 |
| 2  | -3 | 4  | 35.49  | 2.35 |
| -2 | 3  | 4  | 35.88  | 2.21 |

## CIF S3

|    |    |    |       |      |
|----|----|----|-------|------|
| -2 | -3 | -4 | 39.37 | 2.41 |
| -2 | -3 | -4 | 36.47 | 2.25 |
| 2  | -3 | -4 | 33.97 | 1.92 |
| -2 | -3 | 4  | 35.13 | 2.18 |
| 2  | -3 | -4 | 36.02 | 2.27 |
| 2  | 3  | 4  | 37.79 | 2.49 |
| 2  | -3 | -4 | 33.88 | 1.97 |
| -2 | 3  | -4 | 33.18 | 1.99 |
| -2 | -3 | 4  | 36.54 | 1.98 |
| -2 | 3  | -4 | 36.07 | 2.25 |
| 2  | 3  | 4  | 33.18 | 1.92 |
| 2  | -3 | -4 | 37.68 | 2.07 |
| 2  | 3  | 4  | 38.10 | 2.36 |
| -2 | -3 | 4  | 36.92 | 1.97 |
| -2 | 3  | -4 | 34.86 | 2.31 |
| 3  | -3 | 4  | 9.76  | 1.39 |
| -3 | 3  | 4  | 7.38  | 0.87 |
| 3  | -3 | 4  | 7.87  | 0.79 |
| 3  | -3 | 4  | 7.76  | 1.38 |
| -3 | -3 | -4 | 8.37  | 0.63 |
| -3 | 3  | 4  | 6.91  | 0.71 |
| -3 | 3  | 4  | 7.67  | 1.01 |
| -3 | -3 | -4 | 7.81  | 1.32 |
| 3  | 3  | -4 | 8.02  | 0.45 |
| 3  | 3  | -4 | 8.33  | 0.65 |
| -3 | -3 | 4  | 7.76  | 0.47 |
| 3  | 3  | 4  | 7.24  | 0.72 |
| -3 | 3  | -4 | 7.79  | 0.88 |
| -3 | -3 | 4  | 7.78  | 0.47 |
| 3  | -3 | -4 | 7.04  | 0.93 |
| 3  | -3 | -4 | 7.33  | 0.71 |
| -3 | -3 | 4  | 7.48  | 0.64 |
| -3 | 3  | -4 | 8.39  | 1.14 |
| -3 | -3 | 4  | 7.77  | 0.47 |
| -3 | 3  | -4 | 7.36  | 1.16 |
| 3  | -3 | -4 | 7.93  | 0.87 |
| 3  | -3 | -4 | 7.08  | 1.14 |
| 3  | 3  | 4  | 7.76  | 1.40 |
| 3  | -3 | -4 | 7.37  | 0.70 |
| 3  | 3  | 4  | 8.59  | 1.23 |
| -3 | 3  | -4 | 6.99  | 0.72 |

## CIF S3

|    |    |    |       |      |
|----|----|----|-------|------|
| -4 | -3 | -4 | 83.83 | 3.94 |
| -4 | 3  | 4  | 77.25 | 4.06 |
| 4  | -3 | 4  | 81.46 | 4.08 |
| -4 | 3  | 4  | 78.92 | 4.25 |
| 4  | -3 | 4  | 72.40 | 4.61 |
| 4  | 3  | -4 | 79.23 | 3.99 |
| -4 | -3 | -4 | 77.23 | 3.99 |
| -4 | 3  | 4  | 73.84 | 3.91 |
| 4  | -3 | -4 | 84.59 | 4.07 |
| 4  | -3 | -4 | 79.04 | 4.02 |
| -4 | 3  | -4 | 77.57 | 3.99 |
| -4 | -3 | 4  | 76.31 | 3.85 |
| 4  | -3 | -4 | 82.59 | 4.14 |
| 4  | -3 | -4 | 82.26 | 4.02 |
| -4 | 3  | -4 | 79.89 | 4.13 |
| 4  | 3  | 4  | 83.30 | 4.04 |
| -4 | 3  | -4 | 76.18 | 4.03 |
| 5  | 3  | -4 | 11.71 | 0.59 |
| -5 | -3 | -4 | 9.71  | 1.18 |
| -5 | 3  | 4  | 9.82  | 0.80 |
| 5  | -3 | 4  | 11.22 | 0.98 |
| -5 | -3 | -4 | 11.02 | 1.02 |
| -5 | 3  | 4  | 10.12 | 0.73 |
| -5 | 3  | 4  | 11.41 | 0.99 |
| -5 | -3 | -4 | 12.87 | 0.81 |
| -5 | -3 | -4 | 9.15  | 0.84 |
| -5 | 3  | -4 | 10.95 | 0.85 |
| 5  | -3 | -4 | 10.66 | 1.05 |
| 5  | -3 | -4 | 10.63 | 0.94 |
| 5  | 3  | 4  | 11.40 | 0.92 |
| -5 | 3  | -4 | 10.87 | 0.90 |
| -5 | 3  | -4 | 11.57 | 0.94 |
| -5 | 3  | -4 | 10.89 | 1.11 |
| -6 | -3 | -4 | 0.02  | 0.44 |
| -6 | -3 | -4 | -0.20 | 0.43 |
| 6  | -3 | 4  | 0.48  | 0.63 |
| -6 | 3  | 4  | -0.02 | 0.46 |
| -6 | -3 | -4 | -0.61 | 0.45 |
| -6 | 3  | 4  | 0.06  | 0.54 |
| -6 | 3  | 4  | 0.20  | 0.38 |
| -6 | -3 | -4 | -0.18 | 0.70 |



## CIF S3

|    |    |    |       |      |
|----|----|----|-------|------|
| 6  | 3  | -4 | -0.17 | 0.22 |
| -6 | -3 | -4 | -0.32 | 0.62 |
| -6 | 3  | -4 | 0.34  | 0.52 |
| -6 | 3  | -4 | 0.11  | 0.48 |
| 6  | -3 | -4 | -0.11 | 0.74 |
| -6 | -3 | 4  | 0.12  | 0.17 |
| 6  | 3  | 4  | -0.02 | 0.54 |
| 6  | -3 | -4 | 0.63  | 0.67 |
| -7 | -3 | -4 | 14.56 | 1.27 |
| 7  | -3 | 4  | 13.86 | 1.33 |
| -7 | -3 | -4 | 15.31 | 0.98 |
| -7 | -3 | -4 | 16.44 | 1.07 |
| -7 | 3  | 4  | 16.10 | 1.01 |
| -7 | -3 | -4 | 15.27 | 1.01 |
| -7 | -3 | -4 | 14.94 | 1.02 |
| -7 | 3  | 4  | 15.94 | 1.06 |
| -7 | 3  | -4 | 15.67 | 1.16 |
| -7 | 3  | -4 | 14.12 | 1.08 |
| 7  | 3  | 4  | 13.28 | 1.25 |
| -7 | -3 | 4  | 16.14 | 0.84 |
| -8 | -3 | -4 | 0.39  | 0.53 |
| -8 | -3 | -4 | 1.21  | 0.41 |
| -8 | -3 | -4 | 0.49  | 1.07 |
| -8 | 3  | 4  | 0.31  | 0.35 |
| -8 | 3  | 4  | 1.11  | 0.44 |
| -8 | -3 | -4 | 0.53  | 0.45 |
| -8 | -3 | -4 | 1.47  | 0.89 |
| -8 | -3 | -4 | 1.37  | 0.52 |
| -8 | 3  | 4  | 0.89  | 0.51 |
| -8 | 3  | 4  | 0.77  | 0.39 |
| -8 | 3  | 4  | 1.44  | 0.56 |
| -8 | 3  | -4 | 1.40  | 0.49 |
| -8 | 3  | -4 | 0.50  | 0.52 |
| -8 | 3  | -4 | 0.97  | 0.62 |
| -8 | 3  | -4 | 0.61  | 0.54 |
| -8 | -3 | 4  | 0.45  | 0.21 |
| -8 | 3  | -4 | 0.50  | 0.52 |
| -8 | 3  | -4 | 0.90  | 0.54 |
| -8 | 3  | -4 | 0.79  | 0.56 |
| -9 | 3  | 4  | 5.28  | 0.77 |
| -9 | -3 | -4 | 5.23  | 0.65 |

## CIF S3

|     |    |    |       |      |
|-----|----|----|-------|------|
| -9  | 3  | 4  | 5.73  | 0.83 |
| -9  | -3 | -4 | 4.37  | 0.56 |
| -9  | 3  | 4  | 5.73  | 0.51 |
| -9  | -3 | -4 | 5.51  | 0.61 |
| -9  | 3  | -4 | 5.69  | 0.63 |
| -9  | 3  | -4 | 4.62  | 0.70 |
| -9  | 3  | -4 | 5.80  | 0.77 |
| -9  | 3  | -4 | 4.88  | 0.77 |
| -9  | 3  | -4 | 5.91  | 0.74 |
| -10 | 3  | 4  | 0.17  | 0.12 |
| -10 | 3  | 4  | -0.03 | 0.40 |
| -10 | 3  | 4  | 0.07  | 0.11 |
| -10 | -3 | -4 | 0.02  | 0.28 |
| -10 | 3  | -4 | 0.58  | 0.29 |
| -10 | 3  | -4 | 0.21  | 0.42 |
| -10 | 3  | -4 | 0.18  | 0.25 |
| -10 | 3  | -4 | -0.11 | 0.36 |
| -10 | 3  | -4 | 0.11  | 0.34 |
| 0   | -4 | 4  | 29.72 | 1.92 |
| 0   | 4  | 4  | 28.60 | 2.00 |
| 0   | 4  | -4 | 27.41 | 1.91 |
| 0   | -4 | 4  | 27.66 | 1.86 |
| 0   | 4  | -4 | 29.02 | 1.83 |
| 0   | 4  | 4  | 24.69 | 2.05 |
| 0   | 4  | -4 | 25.96 | 1.59 |
| 0   | -4 | -4 | 27.87 | 1.77 |
| 0   | 4  | -4 | 28.16 | 1.62 |
| 0   | -4 | -4 | 28.70 | 1.92 |
| 0   | 4  | -4 | 28.31 | 1.87 |
| 0   | -4 | -4 | 31.71 | 2.06 |
| 0   | -4 | 4  | 27.64 | 2.05 |
| 1   | 4  | -4 | 37.46 | 2.06 |
| -1  | 4  | 4  | 38.51 | 2.44 |
| 1   | 4  | -4 | 37.99 | 2.35 |
| -1  | 4  | 4  | 42.78 | 2.60 |
| 1   | -4 | 4  | 40.33 | 2.53 |
| 1   | 4  | -4 | 35.82 | 2.27 |
| 1   | 4  | -4 | 39.76 | 2.31 |
| 1   | -4 | 4  | 39.73 | 2.59 |
| 1   | 4  | -4 | 40.87 | 2.09 |
| -1  | -4 | -4 | 39.59 | 2.62 |

## CIF S3

|    |    |    |       |      |
|----|----|----|-------|------|
| -1 | -4 | -4 | 39.55 | 2.51 |
| 1  | -4 | -4 | 39.79 | 2.26 |
| -1 | 4  | -4 | 41.27 | 2.45 |
| -1 | -4 | 4  | 38.17 | 2.45 |
| -1 | 4  | -4 | 36.68 | 2.12 |
| -1 | 4  | -4 | 39.74 | 2.49 |
| 1  | -4 | -4 | 41.55 | 2.51 |
| 1  | 4  | 4  | 43.06 | 2.70 |
| -1 | 4  | -4 | 36.51 | 2.13 |
| 1  | -4 | -4 | 37.75 | 2.55 |
| 1  | 4  | 4  | 36.82 | 2.09 |
| -1 | 4  | -4 | 38.12 | 2.19 |
| 1  | 4  | 4  | 40.38 | 2.55 |
| -1 | -4 | 4  | 39.94 | 2.30 |
| -1 | 4  | -4 | 38.41 | 2.43 |
| 1  | -4 | -4 | 41.99 | 2.21 |
| 2  | 4  | -4 | 1.14  | 0.54 |
| -2 | 4  | 4  | 0.67  | 0.71 |
| -2 | 4  | 4  | 0.87  | 0.64 |
| -2 | -4 | -4 | 1.93  | 0.99 |
| -2 | -4 | -4 | 1.11  | 0.89 |
| 2  | 4  | -4 | 0.57  | 0.21 |
| 2  | 4  | -4 | 1.58  | 0.48 |
| 2  | -4 | 4  | 0.92  | 0.66 |
| 2  | -4 | 4  | 1.33  | 0.87 |
| 2  | -4 | 4  | 1.20  | 0.88 |
| 2  | 4  | -4 | 1.15  | 0.44 |
| 2  | -4 | -4 | -0.04 | 0.77 |
| 2  | -4 | -4 | 0.94  | 0.78 |
| -2 | -4 | 4  | 1.37  | 0.50 |
| -2 | -4 | 4  | 0.85  | 0.72 |
| -2 | 4  | -4 | 1.43  | 0.53 |
| -2 | 4  | -4 | 0.86  | 0.79 |
| 2  | -4 | -4 | 1.04  | 0.81 |
| -2 | 4  | -4 | 1.65  | 0.53 |
| 2  | 4  | 4  | 1.61  | 0.94 |
| 2  | 4  | 4  | 1.52  | 0.49 |
| -2 | -4 | 4  | 1.70  | 0.47 |
| -2 | 4  | -4 | 1.07  | 0.72 |
| 2  | -4 | -4 | 1.65  | 0.59 |
| 2  | 4  | 4  | 0.67  | 0.87 |

## CIF S3

|    |    |    |       |      |
|----|----|----|-------|------|
| -2 | -4 | 4  | 1.53  | 0.33 |
| 3  | 4  | -4 | 14.38 | 0.87 |
| 3  | -4 | 4  | 15.37 | 1.17 |
| 3  | -4 | 4  | 13.93 | 1.62 |
| 3  | -4 | 4  | 13.23 | 1.02 |
| -3 | 4  | 4  | 13.43 | 1.26 |
| -3 | 4  | 4  | 13.02 | 1.32 |
| -3 | 4  | 4  | 14.20 | 1.22 |
| -3 | -4 | -4 | 14.02 | 0.90 |
| -3 | 4  | 4  | 13.69 | 0.91 |
| -3 | -4 | -4 | 13.34 | 1.64 |
| 3  | -4 | 4  | 12.38 | 1.53 |
| -3 | -4 | -4 | 15.40 | 1.07 |
| 3  | 4  | -4 | 14.28 | 1.10 |
| 3  | -4 | -4 | 14.53 | 1.20 |
| -3 | 4  | -4 | 13.28 | 1.50 |
| -3 | -4 | 4  | 13.63 | 0.76 |
| -3 | 4  | -4 | 15.38 | 1.15 |
| 3  | -4 | -4 | 16.43 | 1.13 |
| -3 | -4 | 4  | 15.99 | 1.04 |
| -3 | 4  | -4 | 13.39 | 1.05 |
| 3  | 4  | 4  | 12.47 | 1.49 |
| -3 | 4  | -4 | 14.65 | 0.99 |
| -3 | -4 | 4  | 13.59 | 0.78 |
| 3  | -4 | -4 | 13.40 | 1.45 |
| -3 | -4 | 4  | 14.85 | 0.87 |
| 3  | 4  | 4  | 16.03 | 0.99 |
| -3 | -4 | 4  | 14.57 | 0.78 |
| 3  | -4 | -4 | 15.53 | 1.04 |
| 3  | 4  | 4  | 17.46 | 1.74 |
| -4 | 4  | 4  | 40.24 | 2.14 |
| -4 | 4  | 4  | 38.97 | 2.06 |
| -4 | -4 | -4 | 38.64 | 2.06 |
| -4 | -4 | -4 | 37.42 | 2.03 |
| 4  | -4 | 4  | 40.13 | 2.87 |
| 4  | -4 | 4  | 37.98 | 2.21 |
| -4 | -4 | -4 | 38.43 | 2.14 |
| -4 | 4  | 4  | 39.50 | 2.24 |
| 4  | 4  | -4 | 39.04 | 1.96 |
| 4  | -4 | -4 | 39.53 | 2.23 |
| -4 | 4  | -4 | 40.79 | 2.17 |

## CIF S3

|    |    |    |       |      |
|----|----|----|-------|------|
| -4 | -4 | 4  | 36.36 | 2.04 |
| -4 | -4 | 4  | 38.74 | 1.94 |
| -4 | 4  | -4 | 39.27 | 2.14 |
| 4  | -4 | -4 | 35.72 | 2.34 |
| -4 | -4 | 4  | 39.67 | 2.04 |
| 4  | -4 | -4 | 39.95 | 2.18 |
| 4  | 4  | 4  | 41.62 | 2.17 |
| -4 | 4  | -4 | 41.32 | 2.28 |
| 5  | -4 | 4  | 1.28  | 0.72 |
| -5 | 4  | 4  | 0.86  | 0.40 |
| -5 | -4 | -4 | 1.20  | 0.49 |
| -5 | 4  | 4  | 0.24  | 0.46 |
| -5 | -4 | -4 | 0.24  | 0.41 |
| 5  | 4  | -4 | 0.77  | 0.26 |
| -5 | -4 | -4 | 0.45  | 0.62 |
| -5 | 4  | 4  | 0.91  | 0.71 |
| -5 | -4 | -4 | 0.17  | 0.68 |
| 5  | 4  | 4  | 0.16  | 0.53 |
| 5  | -4 | -4 | 1.17  | 0.67 |
| -5 | 4  | -4 | 0.29  | 0.57 |
| -5 | 4  | -4 | 0.04  | 0.52 |
| 5  | -4 | -4 | 0.19  | 0.73 |
| -5 | 4  | -4 | 1.35  | 0.77 |
| 5  | -4 | -4 | -0.09 | 0.73 |
| -6 | -4 | -4 | 40.58 | 2.23 |
| -6 | 4  | 4  | 43.81 | 2.21 |
| -6 | -4 | -4 | 46.77 | 2.20 |
| -6 | 4  | 4  | 42.51 | 2.23 |
| -6 | -4 | -4 | 42.07 | 2.21 |
| 6  | -4 | 4  | 40.94 | 2.47 |
| -6 | 4  | 4  | 42.25 | 2.38 |
| -6 | -4 | -4 | 38.88 | 2.34 |
| -6 | -4 | -4 | 39.24 | 2.40 |
| -6 | -4 | -4 | 40.55 | 2.43 |
| 6  | -4 | -4 | 42.87 | 2.40 |
| -6 | 4  | -4 | 42.23 | 2.44 |
| 6  | -4 | -4 | 38.19 | 2.52 |
| 6  | -4 | -4 | 41.56 | 2.41 |
| -6 | 4  | -4 | 42.75 | 2.26 |
| -6 | 4  | -4 | 40.22 | 2.23 |
| -6 | 4  | -4 | 40.70 | 2.30 |

## CIF S3

|    |    |    |       |      |
|----|----|----|-------|------|
| -6 | -4 | 4  | 43.14 | 2.09 |
| 6  | 4  | 4  | 41.14 | 2.37 |
| -7 | -4 | -4 | 17.70 | 1.20 |
| -7 | -4 | -4 | 21.09 | 1.30 |
| -7 | 4  | 4  | 21.40 | 1.26 |
| -7 | -4 | -4 | 20.58 | 1.18 |
| -7 | -4 | -4 | 17.72 | 1.43 |
| 7  | -4 | 4  | 18.37 | 1.51 |
| -7 | -4 | -4 | 20.36 | 1.42 |
| -7 | -4 | -4 | 20.23 | 1.25 |
| -7 | 4  | 4  | 19.61 | 1.29 |
| -7 | 4  | 4  | 21.59 | 1.31 |
| -7 | -4 | 4  | 21.19 | 1.45 |
| 7  | -4 | -4 | 19.92 | 1.47 |
| -7 | 4  | -4 | 19.15 | 1.38 |
| -7 | -4 | 4  | 20.91 | 1.06 |
| -7 | 4  | -4 | 20.36 | 1.31 |
| 7  | 4  | 4  | 18.17 | 1.44 |
| -8 | -4 | -4 | 3.19  | 1.07 |
| -8 | 4  | 4  | 2.19  | 0.53 |
| -8 | 4  | 4  | 1.62  | 0.49 |
| -8 | -4 | -4 | 1.81  | 0.52 |
| -8 | -4 | -4 | 2.59  | 0.62 |
| -8 | -4 | -4 | 3.04  | 0.64 |
| -8 | -4 | -4 | 2.34  | 0.61 |
| -8 | 4  | 4  | 2.28  | 0.58 |
| -8 | 4  | 4  | 3.54  | 0.72 |
| -8 | 4  | 4  | 2.97  | 0.69 |
| -8 | 4  | 4  | 2.42  | 0.45 |
| -8 | 4  | -4 | 1.16  | 0.85 |
| -8 | 4  | -4 | 4.00  | 0.86 |
| -8 | 4  | -4 | 3.79  | 0.74 |
| -8 | 4  | -4 | 3.68  | 0.79 |
| -8 | 4  | -4 | 2.82  | 0.63 |
| -8 | 4  | -4 | 2.55  | 0.53 |
| -8 | 4  | -4 | 2.44  | 0.61 |
| -8 | 4  | -4 | 1.86  | 0.57 |
| -9 | 4  | 4  | 7.87  | 0.86 |
| -9 | 4  | 4  | 8.73  | 0.63 |
| -9 | -4 | -4 | 7.85  | 0.69 |
| -9 | -4 | -4 | 7.08  | 0.66 |

## CIF S3

|     |    |    |       |      |
|-----|----|----|-------|------|
| -9  | -4 | -4 | 7.82  | 0.67 |
| -9  | 4  | -4 | 7.55  | 0.82 |
| -9  | 4  | -4 | 9.08  | 0.85 |
| -9  | 4  | -4 | 7.08  | 0.75 |
| -9  | 4  | -4 | 7.19  | 0.80 |
| -9  | 4  | -4 | 9.40  | 0.82 |
| -9  | 4  | -4 | 8.26  | 0.86 |
| -10 | 4  | 4  | 0.44  | 0.36 |
| -10 | 4  | 4  | 0.45  | 0.16 |
| -10 | 4  | 4  | 0.47  | 0.16 |
| -10 | 4  | -4 | 0.67  | 0.37 |
| -10 | 4  | -4 | 0.31  | 0.24 |
| -10 | 4  | -4 | 0.59  | 0.35 |
| -10 | 4  | -4 | 0.62  | 0.30 |
| -10 | 4  | -4 | 0.14  | 0.36 |
| 0   | 5  | -4 | 56.44 | 2.94 |
| 0   | -5 | 4  | 59.51 | 3.47 |
| 0   | 5  | 4  | 58.98 | 3.52 |
| 0   | 5  | 4  | 49.90 | 3.30 |
| 0   | -5 | -4 | 58.26 | 3.06 |
| 0   | -5 | -4 | 54.28 | 3.37 |
| 0   | 5  | -4 | 52.49 | 3.26 |
| 0   | 5  | -4 | 53.81 | 2.97 |
| 0   | -5 | 4  | 59.76 | 3.67 |
| 0   | -5 | -4 | 54.67 | 3.33 |
| 0   | 5  | -4 | 56.40 | 3.23 |
| 0   | 5  | -4 | 55.26 | 3.32 |
| 1   | -5 | 4  | 87.42 | 4.49 |
| 1   | 5  | -4 | 91.12 | 4.56 |
| -1  | 5  | 4  | 84.46 | 5.01 |
| 1   | 5  | -4 | 94.10 | 4.85 |
| -1  | -5 | -4 | 90.99 | 4.98 |
| -1  | 5  | 4  | 85.60 | 4.48 |
| 1   | -5 | 4  | 91.39 | 4.95 |
| -1  | -5 | -4 | 92.78 | 5.00 |
| 1   | 5  | -4 | 94.58 | 4.80 |
| 1   | 5  | -4 | 90.08 | 4.88 |
| 1   | 5  | -4 | 92.04 | 4.53 |
| -1  | 5  | -4 | 85.76 | 4.85 |
| -1  | 5  | -4 | 87.24 | 4.93 |
| 1   | -5 | -4 | 95.38 | 4.99 |

## CIF S3

|    |    |    |       |      |
|----|----|----|-------|------|
| -1 | 5  | -4 | 87.95 | 4.59 |
| 1  | 5  | 4  | 83.17 | 4.54 |
| -1 | 5  | -4 | 96.79 | 5.04 |
| 1  | -5 | -4 | 92.02 | 4.72 |
| 1  | 5  | 4  | 78.54 | 4.90 |
| -1 | -5 | 4  | 92.10 | 4.95 |
| -1 | 5  | -4 | 88.62 | 4.64 |
| 1  | -5 | -4 | 98.20 | 4.64 |
| 1  | 5  | 4  | 73.97 | 5.02 |
| -1 | -5 | 4  | 98.11 | 4.80 |
| -2 | -5 | -4 | 61.27 | 3.16 |
| -2 | -5 | -4 | 68.41 | 3.88 |
| 2  | 5  | -4 | 63.31 | 3.26 |
| -2 | -5 | -4 | 62.21 | 3.68 |
| -2 | -5 | -4 | 62.91 | 3.31 |
| 2  | 5  | -4 | 65.47 | 3.49 |
| 2  | 5  | -4 | 64.37 | 3.21 |
| 2  | 5  | -4 | 66.16 | 3.50 |
| 2  | -5 | 4  | 56.09 | 3.21 |
| 2  | -5 | 4  | 60.84 | 3.74 |
| -2 | 5  | 4  | 63.69 | 3.20 |
| -2 | 5  | -4 | 62.36 | 3.26 |
| -2 | 5  | -4 | 55.55 | 3.72 |
| -2 | 5  | -4 | 61.64 | 3.69 |
| -2 | 5  | -4 | 61.21 | 3.32 |
| 2  | -5 | -4 | 61.90 | 3.76 |
| -2 | -5 | 4  | 60.38 | 3.23 |
| -2 | -5 | 4  | 66.16 | 3.46 |
| 2  | 5  | 4  | 63.08 | 3.75 |
| -2 | 5  | -4 | 66.44 | 3.23 |
| 2  | -5 | -4 | 63.49 | 3.44 |
| 2  | -5 | -4 | 64.27 | 3.36 |
| 2  | 5  | 4  | 65.70 | 3.27 |
| -2 | -5 | 4  | 65.51 | 3.67 |
| 2  | 5  | 4  | 59.15 | 3.87 |
| -2 | -5 | 4  | 60.67 | 3.13 |
| -2 | -5 | 4  | 65.16 | 3.12 |
| 3  | 5  | -4 | 2.25  | 0.52 |
| 3  | -5 | 4  | 3.30  | 0.81 |
| -3 | -5 | -4 | 2.27  | 0.66 |
| -3 | -5 | -4 | 2.84  | 0.53 |



## CIF S3

|    |    |    |       |      |
|----|----|----|-------|------|
| -3 | -5 | -4 | 1.62  | 1.07 |
| -3 | 5  | 4  | 3.27  | 1.01 |
| 3  | -5 | 4  | 1.32  | 1.08 |
| 3  | -5 | 4  | 2.43  | 0.71 |
| -3 | 5  | 4  | 2.24  | 0.50 |
| -3 | -5 | 4  | 2.62  | 0.42 |
| -3 | -5 | 4  | 1.72  | 0.41 |
| 3  | -5 | -4 | 3.63  | 1.17 |
| -3 | 5  | -4 | 3.19  | 0.82 |
| -3 | 5  | -4 | 2.64  | 1.17 |
| -3 | 5  | -4 | 2.51  | 0.63 |
| -3 | -5 | 4  | 2.94  | 0.56 |
| -3 | 5  | -4 | 2.26  | 0.64 |
| 3  | 5  | 4  | 1.95  | 1.04 |
| -3 | -5 | 4  | 2.49  | 0.34 |
| 3  | 5  | 4  | 2.53  | 0.61 |
| 3  | -5 | -4 | 3.51  | 1.04 |
| 3  | -5 | -4 | 1.89  | 0.82 |
| -3 | -5 | 4  | 1.09  | 0.52 |
| 4  | -5 | 4  | 1.12  | 0.69 |
| -4 | 5  | 4  | 1.96  | 0.54 |
| 4  | -5 | 4  | 0.69  | 1.08 |
| -4 | -5 | -4 | 1.18  | 0.47 |
| -4 | -5 | -4 | 1.29  | 0.66 |
| -4 | -5 | -4 | 0.04  | 0.94 |
| -4 | -5 | -4 | 1.48  | 0.50 |
| 4  | 5  | 4  | 0.33  | 0.93 |
| -4 | -5 | 4  | 1.42  | 0.37 |
| 4  | -5 | -4 | 1.30  | 0.84 |
| -4 | 5  | -4 | 1.23  | 0.59 |
| -4 | -5 | 4  | 1.22  | 0.31 |
| 4  | 5  | 4  | 1.28  | 0.60 |
| -4 | 5  | -4 | 1.31  | 0.68 |
| -4 | -5 | 4  | 1.55  | 0.32 |
| 4  | -5 | -4 | 1.58  | 0.89 |
| -4 | 5  | -4 | 1.45  | 0.54 |
| -5 | -5 | -4 | 8.65  | 0.89 |
| -5 | 5  | 4  | 9.71  | 0.89 |
| -5 | 5  | 4  | 10.80 | 1.19 |
| 5  | -5 | 4  | 9.69  | 1.10 |
| -5 | -5 | -4 | 10.91 | 1.17 |

## CIF S3

|    |    |    |       |      |
|----|----|----|-------|------|
| -5 | -5 | -4 | 8.63  | 1.06 |
| -5 | -5 | -4 | 10.75 | 0.80 |
| 5  | -5 | -4 | 9.54  | 1.20 |
| 5  | 5  | 4  | 9.99  | 0.98 |
| 5  | -5 | -4 | 9.82  | 1.09 |
| -5 | 5  | -4 | 9.96  | 1.03 |
| -5 | 5  | -4 | 10.25 | 1.23 |
| -5 | 5  | -4 | 9.65  | 0.91 |
| -5 | -5 | 4  | 7.65  | 1.00 |
| -6 | 5  | 4  | 5.25  | 1.07 |
| -6 | -5 | -4 | 6.13  | 1.02 |
| -6 | -5 | -4 | 5.39  | 0.77 |
| -6 | -5 | -4 | 5.40  | 0.78 |
| -6 | -5 | -4 | 6.77  | 0.70 |
| -6 | -5 | -4 | 3.86  | 0.95 |
| -6 | 5  | 4  | 5.59  | 0.73 |
| -6 | -5 | -4 | 5.78  | 1.03 |
| -6 | 5  | 4  | 4.95  | 0.82 |
| 6  | -5 | 4  | 5.45  | 1.03 |
| -6 | 5  | -4 | 5.84  | 0.89 |
| -6 | -5 | 4  | 6.23  | 0.93 |
| -6 | 5  | -4 | 6.32  | 0.91 |
| 6  | 5  | 4  | 5.19  | 0.90 |
| -6 | 5  | -4 | 5.73  | 0.86 |
| 6  | -5 | -4 | 6.09  | 1.06 |
| -6 | -5 | 4  | 5.37  | 0.48 |
| 6  | -5 | -4 | 4.44  | 1.18 |
| -7 | -5 | -4 | 37.37 | 1.86 |
| -7 | -5 | -4 | 28.98 | 1.88 |
| -7 | 5  | 4  | 35.48 | 1.99 |
| -7 | -5 | -4 | 33.93 | 1.92 |
| -7 | -5 | -4 | 36.06 | 2.14 |
| -7 | -5 | -4 | 33.82 | 2.74 |
| -7 | -5 | -4 | 37.45 | 1.99 |
| -7 | 5  | -4 | 36.80 | 1.99 |
| -7 | 5  | -4 | 37.03 | 2.06 |
| -7 | -5 | 4  | 35.07 | 2.09 |
| -7 | -5 | 4  | 36.07 | 1.80 |
| -8 | -5 | -4 | 0.28  | 0.49 |
| -8 | 5  | 4  | 0.16  | 0.46 |
| -8 | 5  | 4  | 0.90  | 0.60 |

## CIF S3

|     |    |    |       |      |
|-----|----|----|-------|------|
| -8  | 5  | 4  | 0.93  | 0.40 |
| -8  | 5  | 4  | 0.94  | 0.45 |
| -8  | -5 | -4 | 0.79  | 0.94 |
| -8  | -5 | -4 | 1.02  | 0.42 |
| -8  | -5 | -4 | 1.34  | 0.46 |
| -8  | -5 | -4 | 1.17  | 0.40 |
| -8  | 5  | 4  | 1.28  | 0.43 |
| -8  | 5  | -4 | 0.49  | 0.47 |
| -8  | 5  | -4 | 1.09  | 0.58 |
| -8  | 5  | -4 | 1.42  | 0.91 |
| -8  | 5  | -4 | 0.82  | 0.56 |
| -8  | 5  | -4 | 1.24  | 0.52 |
| -8  | 5  | -4 | 1.85  | 0.61 |
| -8  | 5  | -4 | 0.23  | 0.70 |
| -9  | 5  | 4  | 1.10  | 0.37 |
| -9  | 5  | 4  | 1.13  | 0.33 |
| -9  | -5 | -4 | 1.13  | 0.36 |
| -9  | 5  | 4  | 0.51  | 0.46 |
| -9  | 5  | 4  | 1.29  | 0.37 |
| -9  | 5  | -4 | 0.73  | 0.46 |
| -9  | 5  | -4 | 1.54  | 0.48 |
| -9  | 5  | -4 | 1.46  | 0.43 |
| -9  | 5  | -4 | 0.44  | 0.40 |
| -9  | 5  | -4 | 0.98  | 0.45 |
| -10 | 5  | 4  | 0.11  | 0.18 |
| -10 | 5  | 4  | 0.13  | 0.16 |
| -10 | -5 | -4 | 0.16  | 0.18 |
| -10 | 5  | 4  | 0.15  | 0.33 |
| -10 | 5  | 4  | 0.10  | 0.19 |
| -10 | 5  | -4 | 0.13  | 0.23 |
| -10 | 5  | -4 | -0.15 | 0.31 |
| -10 | 5  | -4 | -0.27 | 0.27 |
| -10 | 5  | -4 | -0.07 | 0.27 |
| 0   | 6  | -4 | 0.79  | 0.75 |
| 0   | 6  | 4  | 0.54  | 0.91 |
| 0   | -6 | -4 | 0.13  | 0.79 |
| 0   | 6  | -4 | 1.06  | 0.60 |
| 0   | 6  | 4  | 1.59  | 0.82 |
| 0   | 6  | -4 | 0.10  | 0.30 |
| 0   | -6 | 4  | 0.93  | 0.56 |
| 0   | -6 | 4  | 0.52  | 0.93 |

## CIF S3

|    |    |    |       |      |
|----|----|----|-------|------|
| 0  | -6 | -4 | 0.67  | 0.86 |
| 0  | 6  | 4  | 0.95  | 0.44 |
| 0  | -6 | -4 | 0.49  | 0.86 |
| 0  | 6  | -4 | 1.15  | 0.67 |
| 0  | 6  | -4 | 0.90  | 0.88 |
| 1  | 6  | -4 | 79.60 | 4.03 |
| 1  | 6  | -4 | 70.53 | 4.27 |
| 1  | -6 | 4  | 75.03 | 3.92 |
| 1  | 6  | -4 | 80.27 | 4.37 |
| 1  | -6 | 4  | 81.14 | 4.44 |
| -1 | 6  | 4  | 83.05 | 4.65 |
| -1 | 6  | 4  | 78.01 | 3.91 |
| -1 | -6 | -4 | 77.40 | 4.51 |
| 1  | -6 | 4  | 75.59 | 4.51 |
| -1 | -6 | -4 | 77.36 | 4.49 |
| 1  | 6  | -4 | 80.19 | 3.99 |
| -1 | -6 | -4 | 77.68 | 4.01 |
| 1  | 6  | -4 | 66.84 | 4.39 |
| -1 | 6  | -4 | 76.60 | 4.43 |
| -1 | -6 | 4  | 81.87 | 4.51 |
| -1 | 6  | -4 | 73.83 | 3.93 |
| 1  | 6  | 4  | 87.94 | 4.77 |
| 1  | -6 | -4 | 65.26 | 4.05 |
| -1 | 6  | -4 | 81.05 | 4.04 |
| -1 | -6 | 4  | 74.49 | 4.02 |
| -1 | 6  | -4 | 82.13 | 4.14 |
| 1  | -6 | -4 | 73.15 | 4.48 |
| 1  | 6  | 4  | 78.90 | 3.90 |
| -1 | 6  | -4 | 87.10 | 4.60 |
| 1  | 6  | 4  | 76.16 | 4.00 |
| -1 | -6 | 4  | 77.99 | 3.88 |
| 1  | 6  | 4  | 67.93 | 4.43 |
| 2  | -6 | 4  | 20.44 | 1.91 |
| 2  | -6 | 4  | 19.32 | 1.26 |
| -2 | -6 | -4 | 18.11 | 1.32 |
| 2  | 6  | -4 | 20.10 | 1.23 |
| -2 | 6  | 4  | 19.44 | 1.18 |
| 2  | 6  | -4 | 20.19 | 1.56 |
| 2  | 6  | -4 | 20.60 | 1.29 |
| -2 | -6 | -4 | 19.83 | 1.16 |
| -2 | -6 | -4 | 22.96 | 2.16 |

## CIF S3

|    |    |    |       |      |
|----|----|----|-------|------|
| 2  | -6 | 4  | 19.99 | 2.07 |
| 2  | 6  | 4  | 14.98 | 1.95 |
| 2  | -6 | -4 | 19.17 | 1.43 |
| -2 | 6  | -4 | 20.67 | 1.90 |
| -2 | -6 | 4  | 16.69 | 1.09 |
| -2 | 6  | -4 | 20.94 | 1.30 |
| -2 | -6 | 4  | 20.21 | 1.27 |
| -2 | -6 | 4  | 19.92 | 1.60 |
| -2 | -6 | 4  | 20.63 | 1.94 |
| -2 | 6  | -4 | 16.65 | 1.23 |
| -2 | -6 | 4  | 20.03 | 1.08 |
| 2  | -6 | -4 | 16.03 | 1.91 |
| -2 | -6 | 4  | 19.22 | 1.20 |
| 2  | 6  | 4  | 17.78 | 1.29 |
| -2 | 6  | -4 | 18.48 | 1.34 |
| -2 | 6  | -4 | 20.00 | 1.91 |
| 2  | -6 | -4 | 13.54 | 1.48 |
| -3 | 6  | 4  | 7.10  | 0.85 |
| 3  | 6  | -4 | 8.11  | 0.75 |
| 3  | -6 | 4  | 7.96  | 0.89 |
| -3 | -6 | -4 | 7.09  | 0.71 |
| -3 | -6 | -4 | 9.61  | 1.59 |
| -3 | 6  | 4  | 7.05  | 0.77 |
| 3  | -6 | 4  | 5.76  | 1.59 |
| 3  | 6  | -4 | 8.00  | 0.85 |
| -3 | -6 | -4 | 6.41  | 0.88 |
| -3 | -6 | 4  | 8.73  | 0.58 |
| -3 | -6 | 4  | 7.83  | 0.80 |
| -3 | 6  | -4 | 7.76  | 0.83 |
| 3  | -6 | -4 | 7.11  | 1.22 |
| 3  | -6 | -4 | 7.06  | 1.13 |
| -3 | 6  | -4 | 7.60  | 0.97 |
| -3 | 6  | -4 | 7.51  | 0.97 |
| 3  | -6 | -4 | 7.10  | 1.47 |
| -3 | 6  | -4 | 10.22 | 1.56 |
| 3  | 6  | 4  | 8.10  | 0.90 |
| 3  | 6  | 4  | 4.81  | 1.53 |
| -3 | -6 | 4  | 6.90  | 0.69 |
| -4 | -6 | -4 | 1.13  | 0.70 |
| 4  | -6 | 4  | 3.68  | 1.07 |
| -4 | -6 | -4 | 2.71  | 0.85 |

## CIF S3

|    |    |    |       |      |
|----|----|----|-------|------|
| -4 | -6 | -4 | 2.10  | 0.62 |
| 4  | 6  | -4 | 2.33  | 0.60 |
| -4 | 6  | 4  | 2.91  | 0.69 |
| -4 | 6  | 4  | 2.62  | 0.64 |
| 4  | -6 | 4  | 3.10  | 0.88 |
| -4 | -6 | -4 | 2.08  | 0.55 |
| -4 | -6 | 4  | 1.67  | 0.31 |
| 4  | -6 | -4 | 1.88  | 0.89 |
| 4  | -6 | -4 | 1.76  | 0.98 |
| -4 | 6  | -4 | 3.69  | 0.74 |
| -4 | 6  | -4 | 2.36  | 0.74 |
| -4 | -6 | 4  | 2.33  | 0.63 |
| -4 | -6 | 4  | 2.67  | 0.47 |
| 4  | 6  | 4  | 3.00  | 0.69 |
| -4 | 6  | -4 | 1.51  | 0.72 |
| -4 | -6 | 4  | 1.36  | 0.88 |
| -4 | -6 | 4  | 2.27  | 0.30 |
| -4 | -6 | 4  | 2.44  | 0.55 |
| -5 | -6 | -4 | 4.90  | 0.77 |
| -5 | 6  | 4  | 4.19  | 0.78 |
| -5 | -6 | -4 | 6.46  | 1.19 |
| -5 | 6  | 4  | 5.81  | 0.91 |
| 5  | -6 | 4  | 5.15  | 0.92 |
| -5 | -6 | -4 | 6.22  | 0.83 |
| -5 | -6 | -4 | 7.06  | 0.75 |
| -5 | -6 | -4 | 8.42  | 1.03 |
| -5 | -6 | 4  | 4.81  | 0.60 |
| -5 | 6  | -4 | 5.37  | 1.00 |
| -5 | 6  | -4 | 8.87  | 1.37 |
| -5 | 6  | -4 | 4.96  | 0.93 |
| 5  | -6 | -4 | 4.50  | 1.05 |
| -5 | -6 | 4  | 4.89  | 0.90 |
| 5  | -6 | -4 | 4.03  | 1.20 |
| 5  | 6  | 4  | 6.09  | 0.91 |
| -5 | 6  | -4 | 4.32  | 0.85 |
| 6  | -6 | 4  | 15.44 | 1.50 |
| -6 | 6  | 4  | 21.24 | 1.66 |
| -6 | 6  | 4  | 21.34 | 1.28 |
| -6 | -6 | -4 | 20.26 | 1.13 |
| -6 | -6 | -4 | 22.42 | 1.29 |
| -6 | -6 | -4 | 18.69 | 1.53 |

## CIF S3

|    |    |    |       |      |
|----|----|----|-------|------|
| -6 | -6 | -4 | 21.38 | 1.71 |
| -6 | -6 | -4 | 20.98 | 1.24 |
| -6 | 6  | 4  | 20.48 | 1.39 |
| -6 | -6 | -4 | 20.75 | 1.66 |
| -6 | -6 | -4 | 21.46 | 1.39 |
| 6  | -6 | -4 | 21.37 | 1.63 |
| -6 | 6  | -4 | 22.40 | 1.48 |
| -6 | -6 | 4  | 20.97 | 1.15 |
| 6  | 6  | 4  | 18.50 | 1.52 |
| -6 | -6 | 4  | 17.83 | 1.57 |
| -6 | 6  | -4 | 19.81 | 1.41 |
| -6 | -6 | 4  | 20.83 | 1.50 |
| -6 | 6  | -4 | 21.78 | 1.43 |
| -7 | -6 | -4 | 0.73  | 0.44 |
| -7 | 6  | 4  | 1.58  | 0.70 |
| -7 | -6 | -4 | -0.35 | 1.05 |
| -7 | -6 | -4 | -0.26 | 0.50 |
| -7 | 6  | 4  | 1.37  | 0.51 |
| -7 | 6  | 4  | 0.47  | 0.53 |
| -7 | 6  | 4  | 1.65  | 0.59 |
| -7 | -6 | -4 | -0.03 | 0.96 |
| -7 | -6 | -4 | -0.49 | 0.55 |
| -7 | 6  | 4  | 1.31  | 0.55 |
| -7 | 6  | 4  | 1.12  | 0.65 |
| -7 | -6 | -4 | -0.27 | 0.99 |
| -7 | 6  | 4  | 1.39  | 0.67 |
| -7 | -6 | -4 | 0.49  | 0.53 |
| -7 | -6 | 4  | 1.20  | 0.23 |
| -7 | -6 | 4  | 1.77  | 0.75 |
| -7 | -6 | 4  | 0.79  | 0.24 |
| -7 | 6  | -4 | 0.93  | 0.97 |
| -7 | 6  | -4 | 0.87  | 0.62 |
| -7 | -6 | 4  | 0.76  | 0.32 |
| -7 | 6  | -4 | 0.63  | 0.65 |
| -7 | -6 | 4  | 1.18  | 0.25 |
| -7 | 6  | -4 | 1.24  | 0.64 |
| -8 | 6  | 4  | 0.32  | 0.50 |
| -8 | -6 | -4 | -0.09 | 0.41 |
| -8 | 6  | 4  | 0.19  | 0.45 |
| -8 | -6 | -4 | 0.53  | 0.47 |
| -8 | 6  | 4  | 0.23  | 0.43 |

## CIF S3

|     |    |    |       |      |
|-----|----|----|-------|------|
| -8  | -6 | -4 | -0.05 | 0.38 |
| -8  | 6  | 4  | 0.50  | 0.44 |
| -8  | -6 | -4 | 0.27  | 0.41 |
| -8  | 6  | 4  | 0.61  | 0.62 |
| -8  | 6  | -4 | 0.62  | 0.53 |
| -8  | 6  | -4 | -0.14 | 0.47 |
| -8  | -6 | 4  | -1.15 | 0.80 |
| -8  | 6  | -4 | -0.53 | 0.55 |
| -8  | 6  | -4 | 0.54  | 0.55 |
| -8  | 6  | -4 | 0.10  | 0.84 |
| -8  | 6  | -4 | 0.66  | 0.57 |
| -9  | 6  | 4  | 1.22  | 0.34 |
| -9  | 6  | 4  | 2.14  | 0.54 |
| -9  | 6  | 4  | 2.54  | 0.50 |
| -9  | 6  | 4  | 2.03  | 0.41 |
| -9  | -6 | -4 | 1.82  | 0.44 |
| -9  | 6  | -4 | 1.56  | 0.46 |
| -9  | 6  | -4 | 1.57  | 0.45 |
| -9  | 6  | -4 | 1.38  | 0.43 |
| -9  | 6  | -4 | 1.96  | 0.45 |
| -10 | -6 | -4 | 4.02  | 0.29 |
| 10  | -6 | 4  | 4.15  | 0.63 |
| -10 | 6  | 4  | 3.01  | 0.31 |
| -10 | -6 | -4 | 4.14  | 0.28 |
| -10 | 6  | 4  | 3.91  | 0.47 |
| -10 | 6  | 4  | 3.92  | 0.29 |
| -10 | 6  | -4 | 3.75  | 0.42 |
| -10 | 6  | -4 | 3.36  | 0.48 |
| -10 | 6  | -4 | 4.06  | 0.47 |
| 0   | 7  | -4 | 33.22 | 2.00 |
| 0   | -7 | 4  | 35.02 | 2.66 |
| 0   | 7  | 4  | 35.94 | 1.87 |
| 0   | -7 | 4  | 33.49 | 1.89 |
| 0   | 7  | -4 | 32.65 | 2.05 |
| 0   | 7  | -4 | 35.10 | 2.66 |
| 0   | -7 | -4 | 27.84 | 2.48 |
| 0   | -7 | -4 | 34.08 | 2.54 |
| 1   | -7 | 4  | 6.81  | 1.57 |
| 1   | -7 | 4  | 5.31  | 1.53 |
| -1  | 7  | 4  | 8.16  | 1.57 |
| -1  | -7 | -4 | 5.62  | 1.53 |



## CIF S3

|    |    |    |       |      |
|----|----|----|-------|------|
| 1  | 7  | -4 | 9.64  | 1.01 |
| -1 | -7 | -4 | 8.27  | 1.36 |
| 1  | -7 | 4  | 7.28  | 0.86 |
| 1  | 7  | -4 | 9.01  | 0.94 |
| -1 | 7  | 4  | 7.99  | 0.79 |
| 1  | 7  | -4 | 6.59  | 1.50 |
| -1 | -7 | 4  | 8.06  | 0.80 |
| 1  | 7  | 4  | 8.44  | 0.75 |
| -1 | -7 | 4  | 7.59  | 0.76 |
| 1  | 7  | 4  | 8.99  | 0.88 |
| -1 | 7  | -4 | 6.56  | 1.53 |
| -1 | -7 | 4  | 8.99  | 1.49 |
| 1  | 7  | 4  | 7.49  | 0.88 |
| 1  | -7 | -4 | 7.81  | 1.46 |
| -1 | 7  | -4 | 8.22  | 0.95 |
| 1  | 7  | 4  | 8.45  | 1.64 |
| 2  | 7  | -4 | 22.64 | 1.40 |
| 2  | -7 | 4  | 22.18 | 1.39 |
| -2 | -7 | -4 | 17.24 | 2.02 |
| 2  | -7 | 4  | 22.37 | 2.02 |
| 2  | -7 | 4  | 19.09 | 2.28 |
| -2 | -7 | -4 | 19.00 | 1.24 |
| 2  | 7  | -4 | 21.13 | 1.42 |
| -2 | 7  | 4  | 20.33 | 1.33 |
| 2  | 7  | 4  | 19.41 | 2.21 |
| -2 | -7 | 4  | 20.70 | 1.24 |
| -2 | 7  | -4 | 20.47 | 1.41 |
| 2  | -7 | -4 | 21.48 | 1.63 |
| -2 | -7 | 4  | 20.72 | 2.07 |
| 2  | 7  | 4  | 20.87 | 1.44 |
| -2 | 7  | -4 | 20.74 | 1.36 |
| -2 | -7 | 4  | 21.53 | 1.43 |
| -2 | -7 | 4  | 20.29 | 1.34 |
| -2 | 7  | -4 | 20.78 | 1.46 |
| -3 | -7 | -4 | 5.57  | 0.66 |
| 3  | 7  | -4 | 6.15  | 0.87 |
| 3  | -7 | 4  | 5.59  | 0.89 |
| -3 | 7  | 4  | 6.19  | 0.72 |
| -3 | -7 | -4 | 5.81  | 0.81 |
| 3  | 7  | -4 | 6.08  | 0.78 |
| -3 | -7 | -4 | 4.65  | 0.91 |

## CIF S3

|    |    |    |       |      |
|----|----|----|-------|------|
| -3 | -7 | -4 | 4.84  | 1.39 |
| -3 | -7 | 4  | 6.08  | 0.85 |
| -3 | -7 | 4  | 6.54  | 0.81 |
| -3 | -7 | 4  | 5.21  | 0.57 |
| -3 | 7  | -4 | 6.07  | 0.90 |
| 3  | 7  | 4  | 6.34  | 0.81 |
| -3 | -7 | 4  | 4.90  | 0.86 |
| 3  | -7 | -4 | 4.88  | 1.00 |
| -3 | -7 | 4  | 5.70  | 0.69 |
| -3 | 7  | -4 | 5.80  | 0.99 |
| -3 | 7  | -4 | 5.55  | 0.83 |
| 3  | -7 | -4 | 3.58  | 1.18 |
| -4 | -7 | -4 | 1.53  | 0.85 |
| 4  | 7  | -4 | 1.93  | 0.60 |
| -4 | 7  | 4  | 1.73  | 0.59 |
| -4 | -7 | -4 | 2.00  | 0.57 |
| -4 | -7 | -4 | 1.11  | 0.79 |
| 4  | 7  | -4 | 1.32  | 0.65 |
| -4 | 7  | 4  | 1.91  | 0.68 |
| 4  | -7 | 4  | 1.75  | 0.74 |
| -4 | -7 | -4 | 1.77  | 0.61 |
| -4 | -7 | -4 | 1.46  | 0.66 |
| -4 | 7  | 4  | 1.46  | 0.59 |
| -4 | 7  | -4 | 2.18  | 0.66 |
| -4 | 7  | -4 | 0.84  | 0.74 |
| -4 | 7  | -4 | 1.38  | 0.79 |
| -4 | -7 | 4  | 1.72  | 0.39 |
| -4 | -7 | 4  | 1.20  | 0.67 |
| 4  | 7  | 4  | 2.03  | 0.77 |
| -4 | -7 | 4  | 1.97  | 0.45 |
| -4 | -7 | 4  | 1.48  | 0.66 |
| 4  | -7 | -4 | 0.47  | 1.06 |
| -4 | -7 | 4  | 1.23  | 0.51 |
| -4 | -7 | 4  | 0.98  | 0.51 |
| 4  | -7 | -4 | 2.44  | 1.05 |
| 5  | 7  | -4 | 26.25 | 1.83 |
| -5 | 7  | 4  | 28.74 | 1.77 |
| -5 | -7 | -4 | 30.20 | 1.66 |
| -5 | -7 | -4 | 32.68 | 1.93 |
| -5 | -7 | -4 | 32.25 | 1.77 |
| -5 | -7 | -4 | 31.30 | 2.07 |

## CIF S3

|    |    |    |       |      |
|----|----|----|-------|------|
| -5 | -7 | -4 | 28.70 | 1.69 |
| -5 | 7  | 4  | 29.46 | 1.71 |
| -5 | 7  | -4 | 29.78 | 1.81 |
| 5  | 7  | 4  | 27.17 | 1.86 |
| -5 | 7  | -4 | 31.26 | 1.91 |
| -5 | -7 | 4  | 28.57 | 1.82 |
| -5 | -7 | 4  | 31.34 | 1.79 |
| -5 | 7  | -4 | 31.04 | 1.81 |
| 5  | -7 | -4 | 25.45 | 2.01 |
| 5  | -7 | -4 | 23.51 | 2.16 |
| -5 | -7 | 4  | 28.29 | 1.60 |
| -6 | 7  | 4  | 11.15 | 1.13 |
| -6 | -7 | -4 | 13.27 | 1.09 |
| -6 | 7  | 4  | 10.89 | 0.97 |
| -6 | -7 | -4 | 11.72 | 0.96 |
| -6 | -7 | -4 | 10.32 | 1.40 |
| -6 | -7 | -4 | 11.23 | 1.29 |
| -6 | -7 | -4 | 10.18 | 0.90 |
| -6 | -7 | 4  | 10.68 | 0.79 |
| -6 | -7 | 4  | 11.41 | 1.29 |
| -6 | -7 | 4  | 11.67 | 1.17 |
| -6 | 7  | -4 | 9.36  | 1.12 |
| -6 | 7  | -4 | 10.93 | 1.18 |
| -6 | 7  | -4 | 11.17 | 1.04 |
| -6 | -7 | 4  | 11.44 | 0.80 |
| -7 | -7 | -4 | 29.48 | 1.91 |
| -7 | 7  | 4  | 28.46 | 1.81 |
| -7 | -7 | -4 | 27.44 | 1.67 |
| -7 | 7  | 4  | 29.16 | 1.73 |
| -7 | 7  | 4  | 28.89 | 1.71 |
| -7 | 7  | 4  | 27.57 | 1.66 |
| -7 | -7 | -4 | 29.20 | 1.65 |
| -7 | 7  | 4  | 29.73 | 1.70 |
| -7 | 7  | 4  | 29.19 | 1.79 |
| -7 | 7  | 4  | 29.11 | 1.70 |
| -7 | -7 | -4 | 27.89 | 1.70 |
| -7 | -7 | -4 | 28.79 | 1.68 |
| -7 | -7 | -4 | 30.25 | 1.94 |
| -7 | -7 | 4  | 30.48 | 1.50 |
| -7 | 7  | -4 | 28.47 | 1.75 |
| -7 | 7  | -4 | 30.59 | 1.79 |

## CIF S3

|    |    |    |       |      |
|----|----|----|-------|------|
| -7 | 7  | -4 | 27.98 | 2.07 |
| -7 | 7  | -4 | 28.83 | 1.76 |
| -7 | -7 | 4  | 28.79 | 1.83 |
| -7 | -7 | 4  | 28.35 | 1.57 |
| -7 | -7 | 4  | 29.80 | 1.48 |
| -8 | 7  | 4  | 0.90  | 0.43 |
| -8 | 7  | 4  | 0.09  | 0.47 |
| 8  | -7 | 4  | -0.20 | 0.72 |
| -8 | -7 | -4 | -0.19 | 0.42 |
| -8 | -7 | -4 | 0.09  | 0.35 |
| -8 | 7  | 4  | 0.26  | 0.44 |
| -8 | 7  | 4  | 0.26  | 0.49 |
| -8 | 7  | -4 | -0.53 | 0.50 |
| -8 | 7  | -4 | 0.09  | 0.52 |
| -8 | 7  | -4 | -0.18 | 0.50 |
| -8 | -7 | 4  | -1.33 | 0.74 |
| -8 | 7  | -4 | 0.44  | 0.81 |
| -8 | 7  | -4 | -0.58 | 0.51 |
| -8 | 7  | -4 | 1.09  | 0.60 |
| -9 | -7 | -4 | 4.93  | 0.59 |
| -9 | 7  | 4  | 6.41  | 0.62 |
| 9  | -7 | 4  | 7.22  | 0.91 |
| -9 | 7  | 4  | 6.62  | 0.67 |
| -9 | 7  | 4  | 6.33  | 0.48 |
| -9 | 7  | 4  | 6.08  | 0.55 |
| -9 | -7 | -4 | 6.83  | 0.50 |
| -9 | 7  | -4 | 5.90  | 0.69 |
| -9 | 7  | -4 | 5.82  | 0.67 |
| -9 | 7  | -4 | 6.50  | 0.66 |
| -9 | 7  | -4 | 6.39  | 0.71 |
| 0  | 8  | -4 | 0.88  | 0.76 |
| 0  | 8  | 4  | 1.38  | 0.62 |
| 0  | -8 | -4 | 4.69  | 1.44 |
| 0  | 8  | -4 | 1.29  | 0.81 |
| 0  | -8 | 4  | 1.74  | 0.61 |
| 0  | -8 | 4  | 1.00  | 0.61 |
| -1 | 8  | 4  | 29.50 | 1.77 |
| 1  | -8 | 4  | 30.20 | 1.79 |
| 1  | 8  | -4 | 35.14 | 1.96 |
| 1  | -8 | 4  | 27.86 | 1.81 |
| 1  | 8  | -4 | 30.65 | 2.00 |

## CIF S3

|    |    |    |       |      |
|----|----|----|-------|------|
| -1 | -8 | 4  | 30.09 | 1.78 |
| -1 | 8  | -4 | 28.45 | 1.92 |
| -1 | -8 | 4  | 29.79 | 1.77 |
| 1  | 8  | 4  | 30.88 | 1.76 |
| -1 | -8 | 4  | 29.43 | 1.73 |
| -2 | 8  | 4  | 7.25  | 0.83 |
| -2 | -8 | -4 | 7.15  | 0.86 |
| 2  | -8 | 4  | 7.00  | 1.01 |
| -2 | -8 | -4 | 6.55  | 0.94 |
| 2  | 8  | -4 | 7.16  | 0.97 |
| 2  | 8  | -4 | 4.58  | 0.93 |
| 2  | -8 | 4  | 7.81  | 0.94 |
| -2 | -8 | 4  | 6.62  | 0.89 |
| -2 | 8  | -4 | 7.57  | 0.92 |
| -2 | 8  | -4 | 6.18  | 0.96 |
| 2  | -8 | -4 | 7.80  | 1.32 |
| -2 | -8 | 4  | 6.62  | 0.91 |
| -2 | -8 | 4  | 7.13  | 1.04 |
| 2  | 8  | 4  | 6.99  | 0.94 |
| -2 | 8  | -4 | 7.46  | 1.11 |
| 2  | 8  | 4  | 6.90  | 0.93 |
| -2 | -8 | 4  | 6.38  | 0.86 |
| -3 | -8 | -4 | 17.88 | 1.45 |
| -3 | -8 | -4 | 16.28 | 1.52 |
| -3 | -8 | -4 | 18.80 | 1.26 |
| -3 | 8  | 4  | 19.44 | 1.31 |
| -3 | -8 | -4 | 17.97 | 1.19 |
| 3  | 8  | -4 | 17.88 | 1.36 |
| -3 | 8  | 4  | 19.05 | 1.33 |
| 3  | -8 | 4  | 18.44 | 1.37 |
| 3  | 8  | -4 | 16.32 | 1.40 |
| -3 | -8 | 4  | 14.85 | 1.29 |
| -3 | -8 | 4  | 17.62 | 1.33 |
| -3 | -8 | 4  | 20.62 | 1.12 |
| 3  | 8  | 4  | 16.53 | 1.40 |
| -3 | 8  | -4 | 18.93 | 1.53 |
| -3 | -8 | 4  | 18.61 | 1.20 |
| -3 | -8 | 4  | 19.80 | 1.37 |
| -3 | 8  | -4 | 18.20 | 1.41 |
| -3 | -8 | 4  | 19.41 | 1.15 |
| -3 | 8  | -4 | 17.90 | 1.34 |

## CIF S3

|    |    |    |       |      |
|----|----|----|-------|------|
| 3  | -8 | -4 | 17.09 | 1.64 |
| 4  | 8  | -4 | 17.00 | 1.41 |
| 4  | 8  | -4 | 16.75 | 1.34 |
| 4  | -8 | 4  | 19.27 | 1.51 |
| -4 | -8 | -4 | 15.07 | 1.62 |
| -4 | -8 | -4 | 18.51 | 1.25 |
| -4 | 8  | 4  | 18.22 | 1.30 |
| -4 | 8  | 4  | 17.10 | 1.36 |
| -4 | -8 | -4 | 19.57 | 1.23 |
| -4 | -8 | -4 | 18.77 | 1.37 |
| -4 | -8 | -4 | 18.64 | 1.41 |
| -4 | -8 | -4 | 17.93 | 1.30 |
| 4  | 8  | 4  | 16.60 | 1.43 |
| -4 | -8 | 4  | 18.08 | 1.24 |
| -4 | -8 | 4  | 18.22 | 1.20 |
| -4 | 8  | -4 | 19.72 | 1.53 |
| -4 | -8 | 4  | 17.78 | 1.48 |
| -4 | 8  | -4 | 19.33 | 1.55 |
| -4 | -8 | 4  | 16.79 | 1.29 |
| -4 | 8  | -4 | 19.08 | 1.35 |
| -4 | -8 | 4  | 15.69 | 1.45 |
| 4  | -8 | -4 | 12.61 | 1.97 |
| 4  | -8 | -4 | 16.16 | 1.62 |
| -4 | -8 | 4  | 18.66 | 1.03 |
| -5 | -8 | -4 | 2.46  | 0.66 |
| -5 | 8  | 4  | 1.97  | 0.71 |
| -5 | -8 | -4 | 1.95  | 0.74 |
| -5 | -8 | -4 | 0.79  | 0.60 |
| -5 | -8 | -4 | 2.29  | 0.93 |
| -5 | -8 | -4 | 1.69  | 1.02 |
| -5 | 8  | 4  | 1.66  | 0.79 |
| -5 | -8 | -4 | 2.02  | 0.53 |
| -5 | 8  | -4 | 1.11  | 0.80 |
| -5 | -8 | 4  | 1.09  | 0.53 |
| -5 | -8 | 4  | 1.57  | 0.82 |
| -5 | -8 | 4  | 1.36  | 0.79 |
| 5  | 8  | 4  | 1.25  | 0.77 |
| 5  | -8 | -4 | 1.70  | 1.15 |
| -5 | 8  | -4 | 1.46  | 0.82 |
| -5 | 8  | -4 | 2.23  | 0.79 |
| -5 | -8 | 4  | 1.38  | 1.05 |

## CIF S3

|    |    |    |      |      |
|----|----|----|------|------|
| -6 | -8 | -4 | 4.73 | 0.88 |
| -6 | 8  | 4  | 6.82 | 1.21 |
| -6 | -8 | -4 | 6.84 | 0.96 |
| 6  | -8 | 4  | 9.10 | 1.17 |
| -6 | 8  | 4  | 7.07 | 1.07 |
| -6 | -8 | -4 | 7.92 | 1.01 |
| -6 | -8 | -4 | 7.40 | 1.23 |
| -6 | -8 | -4 | 5.07 | 0.95 |
| -6 | 8  | 4  | 8.76 | 1.06 |
| -6 | 8  | 4  | 7.55 | 0.94 |
| -6 | 8  | 4  | 7.88 | 1.04 |
| -6 | -8 | -4 | 6.93 | 1.20 |
| -6 | 8  | 4  | 6.82 | 1.06 |
| -6 | 8  | 4  | 6.12 | 0.92 |
| -6 | 8  | 4  | 6.51 | 0.97 |
| -6 | 8  | -4 | 7.06 | 0.88 |
| -6 | 8  | -4 | 7.64 | 1.11 |
| -6 | 8  | -4 | 7.49 | 1.03 |
| -6 | -8 | 4  | 8.76 | 1.09 |
| -6 | -8 | 4  | 7.65 | 0.71 |
| -6 | 8  | -4 | 8.52 | 1.05 |
| -6 | -8 | 4  | 6.74 | 0.68 |
| -6 | -8 | 4  | 7.06 | 1.26 |
| -6 | -8 | 4  | 7.76 | 0.54 |
| -6 | 8  | -4 | 7.85 | 1.08 |
| -6 | -8 | 4  | 7.18 | 0.68 |
| -6 | 8  | -4 | 7.11 | 1.42 |
| -7 | -8 | -4 | 4.61 | 0.98 |
| -7 | 8  | 4  | 4.94 | 0.75 |
| -7 | 8  | 4  | 4.19 | 0.96 |
| -7 | 8  | 4  | 3.28 | 0.81 |
| -7 | -8 | -4 | 2.61 | 0.92 |
| -7 | -8 | -4 | 3.83 | 0.77 |
| 7  | -8 | 4  | 4.45 | 1.06 |
| -7 | 8  | 4  | 2.98 | 1.01 |
| -7 | 8  | 4  | 4.20 | 0.92 |
| -7 | -8 | -4 | 4.19 | 0.77 |
| -7 | 8  | 4  | 3.92 | 0.84 |
| -7 | 8  | 4  | 3.98 | 0.80 |
| -7 | 8  | 4  | 4.32 | 0.82 |
| -7 | -8 | 4  | 4.70 | 1.10 |

## CIF S3

|    |    |    |      |      |
|----|----|----|------|------|
| -7 | 8  | -4 | 4.50 | 0.92 |
| -7 | -8 | 4  | 4.81 | 0.42 |
| -7 | 8  | -4 | 1.58 | 0.95 |
| -7 | -8 | 4  | 4.05 | 0.49 |
| -7 | -8 | 4  | 5.25 | 1.00 |
| -7 | 8  | -4 | 4.65 | 0.93 |
| -8 | 8  | 4  | 4.34 | 0.69 |
| 8  | -8 | 4  | 3.89 | 0.94 |
| -8 | -8 | -4 | 3.71 | 0.67 |
| -8 | 8  | 4  | 3.99 | 0.73 |
| -8 | -8 | -4 | 4.91 | 0.66 |
| -8 | 8  | 4  | 3.77 | 0.66 |
| -8 | -8 | -4 | 4.07 | 0.56 |
| -8 | 8  | -4 | 3.36 | 0.68 |
| -8 | 8  | -4 | 3.61 | 0.69 |
| -8 | 8  | -4 | 4.10 | 0.74 |
| -8 | -8 | 4  | 3.50 | 0.91 |
| -8 | 8  | -4 | 3.29 | 0.73 |
| -8 | 8  | -4 | 2.48 | 0.78 |
| -8 | 8  | -4 | 4.21 | 0.81 |
| 9  | -8 | 4  | 6.72 | 0.66 |
| -9 | 8  | 4  | 6.88 | 0.44 |
| -9 | -8 | -4 | 7.07 | 0.49 |
| -9 | 8  | 4  | 7.14 | 0.56 |
| -9 | 8  | 4  | 6.62 | 0.61 |
| -9 | 8  | -4 | 6.81 | 0.57 |
| -9 | 8  | -4 | 5.09 | 0.60 |
| -9 | 8  | -4 | 6.35 | 0.65 |
| -9 | 8  | -4 | 6.19 | 0.62 |
| 0  | -9 | 4  | 0.85 | 0.69 |
| 0  | 9  | -4 | 1.51 | 0.84 |
| 0  | 9  | -4 | 1.74 | 0.96 |
| 0  | -9 | 4  | 1.39 | 0.71 |
| 0  | 9  | 4  | 0.96 | 0.64 |
| 0  | -9 | 4  | 1.85 | 0.70 |
| 1  | -9 | 4  | 2.76 | 0.74 |
| -1 | -9 | -4 | 1.90 | 0.77 |
| 1  | -9 | 4  | 2.54 | 0.75 |
| 1  | -9 | 4  | 1.36 | 0.73 |
| 1  | 9  | -4 | 1.30 | 0.83 |
| -1 | 9  | 4  | 1.40 | 0.64 |



## CIF S3

|    |    |    |       |      |
|----|----|----|-------|------|
| 1  | 9  | -4 | 0.30  | 0.79 |
| -1 | 9  | -4 | 1.54  | 0.72 |
| -1 | -9 | 4  | 2.76  | 0.71 |
| -1 | -9 | 4  | 2.80  | 0.74 |
| 1  | -9 | -4 | 1.69  | 0.87 |
| -1 | -9 | 4  | 2.04  | 0.64 |
| -1 | -9 | 4  | 2.02  | 0.65 |
| -2 | -9 | -4 | 44.39 | 2.40 |
| -2 | -9 | -4 | 40.78 | 2.50 |
| -2 | -9 | -4 | 41.00 | 2.22 |
| 2  | -9 | 4  | 39.41 | 2.23 |
| -2 | 9  | 4  | 40.95 | 2.26 |
| 2  | 9  | -4 | 40.96 | 2.42 |
| 2  | -9 | 4  | 42.43 | 2.30 |
| -2 | -9 | -4 | 39.50 | 2.32 |
| 2  | 9  | -4 | 35.54 | 2.49 |
| -2 | 9  | -4 | 38.60 | 2.41 |
| 2  | -9 | -4 | 42.28 | 2.36 |
| -2 | -9 | 4  | 38.13 | 2.31 |
| -2 | -9 | 4  | 40.22 | 2.23 |
| -2 | -9 | 4  | 38.13 | 2.29 |
| -2 | -9 | 4  | 39.04 | 2.17 |
| 2  | 9  | 4  | 37.73 | 2.41 |
| -2 | 9  | -4 | 40.46 | 2.33 |
| -2 | 9  | -4 | 36.85 | 2.43 |
| -3 | 9  | 4  | 79.35 | 4.23 |
| -3 | -9 | -4 | 86.97 | 4.20 |
| 3  | -9 | 4  | 83.68 | 4.29 |
| -3 | -9 | -4 | 81.79 | 4.18 |
| -3 | -9 | -4 | 82.54 | 4.23 |
| -3 | -9 | -4 | 85.82 | 4.18 |
| -3 | 9  | 4  | 83.27 | 4.22 |
| -3 | -9 | -4 | 80.32 | 4.22 |
| -3 | -9 | 4  | 79.69 | 4.17 |
| -3 | -9 | 4  | 82.20 | 4.27 |
| 3  | 9  | 4  | 72.86 | 4.37 |
| -3 | -9 | 4  | 78.14 | 4.31 |
| -3 | -9 | 4  | 84.83 | 4.14 |
| -3 | 9  | -4 | 83.96 | 4.51 |
| -3 | 9  | -4 | 84.06 | 4.39 |
| -3 | -9 | 4  | 81.61 | 4.20 |

## CIF S3

|    |    |    |       |      |
|----|----|----|-------|------|
| -3 | 9  | -4 | 83.57 | 4.30 |
| -3 | -9 | 4  | 73.55 | 4.18 |
| -3 | -9 | 4  | 84.18 | 4.17 |
| -4 | 9  | 4  | 1.22  | 0.69 |
| -4 | -9 | -4 | 1.68  | 0.67 |
| -4 | 9  | 4  | 0.73  | 0.70 |
| 4  | 9  | -4 | 1.55  | 0.81 |
| -4 | -9 | -4 | 1.66  | 0.64 |
| -4 | -9 | -4 | 0.79  | 1.00 |
| -4 | -9 | -4 | 1.79  | 0.74 |
| -4 | -9 | -4 | 0.67  | 0.74 |
| -4 | 9  | 4  | 0.49  | 0.70 |
| -4 | -9 | -4 | 1.92  | 0.97 |
| 4  | -9 | 4  | 0.48  | 0.86 |
| -4 | -9 | -4 | 2.15  | 0.80 |
| -4 | -9 | 4  | 0.27  | 0.81 |
| 4  | -9 | -4 | 0.91  | 1.13 |
| 4  | 9  | 4  | 0.78  | 0.81 |
| -4 | -9 | 4  | 1.56  | 0.63 |
| -4 | -9 | 4  | 1.16  | 0.89 |
| -4 | 9  | -4 | 1.85  | 0.93 |
| -4 | -9 | 4  | 1.51  | 0.82 |
| -4 | -9 | 4  | 1.07  | 0.37 |
| -4 | 9  | -4 | -0.32 | 0.78 |
| -4 | 9  | -4 | 1.17  | 0.77 |
| -4 | -9 | 4  | 2.01  | 0.67 |
| 5  | -9 | 4  | 4.82  | 1.01 |
| -5 | -9 | -4 | 2.99  | 0.84 |
| -5 | -9 | -4 | 2.57  | 1.00 |
| -5 | 9  | 4  | 4.88  | 1.02 |
| -5 | 9  | 4  | 4.07  | 0.94 |
| -5 | -9 | -4 | 3.07  | 0.82 |
| -5 | 9  | 4  | 4.25  | 1.12 |
| -5 | -9 | -4 | 3.12  | 0.70 |
| -5 | -9 | -4 | 5.26  | 1.32 |
| -5 | 9  | 4  | 4.60  | 1.01 |
| -5 | -9 | -4 | 3.74  | 0.90 |
| -5 | -9 | -4 | 2.54  | 0.69 |
| -5 | -9 | -4 | 3.77  | 0.94 |
| -5 | 9  | 4  | 2.67  | 0.71 |
| -5 | -9 | -4 | 3.79  | 0.95 |

## CIF S3

|    |    |    |      |      |
|----|----|----|------|------|
| -5 | -9 | 4  | 3.26 | 0.52 |
| -5 | -9 | 4  | 3.38 | 0.50 |
| -5 | 9  | -4 | 4.25 | 0.87 |
| -5 | -9 | 4  | 3.85 | 0.98 |
| -5 | -9 | 4  | 2.77 | 0.85 |
| -5 | 9  | -4 | 5.07 | 1.04 |
| -5 | -9 | 4  | 4.96 | 0.72 |
| -5 | 9  | -4 | 3.21 | 1.05 |
| -5 | -9 | 4  | 2.98 | 0.95 |
| -5 | -9 | 4  | 3.06 | 0.47 |
| -5 | 9  | -4 | 5.09 | 1.33 |
| -5 | -9 | 4  | 3.51 | 0.74 |
| -6 | -9 | -4 | 3.66 | 0.97 |
| -6 | 9  | 4  | 1.96 | 0.63 |
| -6 | 9  | 4  | 2.24 | 0.90 |
| -6 | 9  | 4  | 1.98 | 0.58 |
| -6 | 9  | 4  | 3.12 | 0.70 |
| -6 | -9 | -4 | 3.35 | 0.79 |
| -6 | 9  | 4  | 1.68 | 0.91 |
| -6 | 9  | 4  | 2.23 | 0.66 |
| -6 | -9 | -4 | 2.80 | 0.97 |
| -6 | -9 | -4 | 1.76 | 0.63 |
| -6 | 9  | 4  | 3.07 | 0.67 |
| 6  | -9 | 4  | 2.02 | 0.67 |
| -6 | -9 | -4 | 2.09 | 0.67 |
| -6 | -9 | -4 | 3.41 | 0.88 |
| -6 | 9  | 4  | 2.32 | 0.71 |
| -6 | -9 | -4 | 2.35 | 0.65 |
| -6 | -9 | 4  | 2.19 | 0.81 |
| -6 | -9 | 4  | 2.84 | 0.55 |
| -6 | 9  | -4 | 4.22 | 1.01 |
| -6 | 9  | -4 | 2.34 | 0.96 |
| -6 | -9 | 4  | 1.34 | 0.86 |
| -6 | -9 | 4  | 2.81 | 0.59 |
| -6 | 9  | -4 | 2.80 | 0.51 |
| -6 | -9 | 4  | 2.66 | 0.41 |
| -6 | 9  | -4 | 2.23 | 0.70 |
| -7 | 9  | 4  | 3.84 | 0.76 |
| -7 | -9 | -4 | 4.31 | 0.79 |
| -7 | -9 | -4 | 2.22 | 0.61 |
| -7 | 9  | 4  | 2.07 | 0.67 |

## CIF S3

|    |     |    |       |      |
|----|-----|----|-------|------|
| -7 | 9   | 4  | 3.67  | 0.73 |
| -7 | -9  | -4 | 2.32  | 0.57 |
| -7 | 9   | 4  | 3.74  | 0.88 |
| -7 | 9   | 4  | 4.16  | 0.80 |
| -7 | -9  | -4 | 3.81  | 0.92 |
| 7  | -9  | 4  | 3.61  | 0.96 |
| -7 | 9   | 4  | 3.34  | 0.75 |
| -7 | -9  | -4 | 2.14  | 0.80 |
| -7 | 9   | 4  | 3.47  | 0.76 |
| -7 | -9  | 4  | 5.02  | 1.12 |
| -7 | -9  | 4  | 3.10  | 0.73 |
| -7 | 9   | -4 | 3.58  | 0.83 |
| -7 | 9   | -4 | 4.83  | 0.85 |
| -7 | -9  | 4  | 4.66  | 0.50 |
| -7 | -9  | 4  | 3.80  | 0.41 |
| -7 | 9   | -4 | 4.23  | 0.98 |
| -8 | 9   | 4  | 4.79  | 0.62 |
| -8 | -9  | -4 | 5.08  | 0.60 |
| -8 | 9   | 4  | 5.27  | 0.63 |
| -8 | -9  | -4 | 5.23  | 0.51 |
| -8 | -9  | -4 | 4.12  | 0.66 |
| -8 | 9   | 4  | 3.78  | 0.62 |
| 8  | -9  | 4  | 3.99  | 0.80 |
| -8 | 9   | -4 | 5.29  | 0.77 |
| -8 | 9   | -4 | 6.64  | 0.96 |
| -8 | 9   | -4 | 4.38  | 0.62 |
| -8 | -9  | 4  | 4.43  | 1.02 |
| -8 | 9   | -4 | 4.02  | 0.69 |
| -8 | 9   | -4 | 3.52  | 0.71 |
| 0  | -10 | 4  | 1.61  | 0.84 |
| 0  | 10  | -4 | 0.71  | 1.01 |
| 0  | -10 | 4  | -0.30 | 0.77 |
| 0  | -10 | 4  | 0.09  | 0.75 |
| 0  | -10 | -4 | -0.92 | 0.83 |
| 0  | -10 | -4 | 0.14  | 0.86 |
| 0  | 10  | 4  | 0.25  | 0.71 |
| -1 | -10 | -4 | -0.23 | 0.85 |
| 1  | -10 | 4  | 0.98  | 0.75 |
| -1 | 10  | 4  | 0.62  | 0.71 |
| 1  | 10  | -4 | 1.48  | 0.93 |
| 1  | -10 | 4  | 0.92  | 0.86 |

## CIF S3

|    |     |    |       |      |
|----|-----|----|-------|------|
| -1 | -10 | -4 | 1.45  | 0.91 |
| -1 | -10 | -4 | 1.13  | 0.95 |
| 1  | 10  | -4 | 0.30  | 0.87 |
| 1  | -10 | 4  | 0.15  | 0.72 |
| -1 | -10 | 4  | 1.34  | 0.76 |
| -1 | 10  | -4 | 0.51  | 0.79 |
| -1 | -10 | 4  | 0.66  | 0.78 |
| 1  | -10 | -4 | 1.26  | 0.96 |
| -1 | -10 | 4  | 0.67  | 0.86 |
| 2  | -10 | 4  | 8.49  | 1.24 |
| 2  | 10  | -4 | 6.88  | 1.19 |
| -2 | -10 | -4 | 7.60  | 1.18 |
| -2 | 10  | 4  | 7.33  | 1.11 |
| -2 | -10 | -4 | 8.06  | 1.14 |
| -2 | -10 | -4 | 8.11  | 1.59 |
| -2 | -10 | -4 | 7.03  | 1.21 |
| -2 | -10 | 4  | 6.92  | 1.62 |
| -2 | 10  | -4 | 7.51  | 1.22 |
| -2 | -10 | 4  | 7.73  | 1.06 |
| -2 | -10 | 4  | 7.21  | 1.22 |
| -2 | -10 | 4  | 7.94  | 1.01 |
| -2 | -10 | 4  | 10.96 | 1.23 |
| -2 | -10 | 4  | 7.74  | 0.93 |
| 2  | -10 | -4 | 8.85  | 1.21 |
| -2 | 10  | -4 | 6.88  | 1.17 |
| -3 | -10 | -4 | 17.22 | 1.43 |
| -3 | 10  | 4  | 19.01 | 1.46 |
| -3 | -10 | -4 | 18.72 | 1.47 |
| -3 | -10 | -4 | 15.17 | 2.06 |
| 3  | 10  | -4 | 14.14 | 2.09 |
| -3 | -10 | -4 | 17.83 | 1.52 |
| -3 | -10 | -4 | 19.75 | 1.44 |
| -3 | -10 | -4 | 17.70 | 1.49 |
| -3 | -10 | -4 | 17.42 | 1.30 |
| -3 | 10  | 4  | 18.61 | 1.47 |
| 3  | -10 | 4  | 17.09 | 1.47 |
| -3 | 10  | -4 | 18.43 | 1.51 |
| -3 | -10 | 4  | 18.62 | 1.44 |
| -3 | -10 | 4  | 18.68 | 1.45 |
| -3 | 10  | -4 | 20.19 | 1.57 |
| -3 | 10  | -4 | 15.78 | 1.64 |

## CIF S3

|    |     |    |       |      |
|----|-----|----|-------|------|
| -3 | -10 | 4  | 18.77 | 1.28 |
| -3 | -10 | 4  | 18.96 | 1.49 |
| -3 | -10 | 4  | 20.15 | 1.37 |
| -4 | 10  | 4  | 1.09  | 0.80 |
| -4 | 10  | 4  | 1.05  | 0.72 |
| -4 | -10 | -4 | 1.19  | 0.83 |
| -4 | 10  | 4  | 0.89  | 0.50 |
| -4 | 10  | 4  | 1.03  | 0.70 |
| -4 | -10 | -4 | 1.62  | 0.89 |
| -4 | -10 | -4 | 1.87  | 0.96 |
| 4  | -10 | 4  | 1.28  | 0.56 |
| -4 | -10 | -4 | 0.50  | 0.73 |
| -4 | -10 | -4 | 0.14  | 0.74 |
| -4 | -10 | -4 | -0.17 | 0.79 |
| -4 | -10 | -4 | 1.45  | 0.59 |
| -4 | 10  | 4  | 1.50  | 0.99 |
| -4 | -10 | -4 | 1.15  | 0.94 |
| -4 | -10 | -4 | 0.85  | 0.78 |
| -4 | 10  | 4  | 0.45  | 0.68 |
| -4 | 10  | 4  | 0.43  | 0.64 |
| 4  | -10 | 4  | 1.29  | 0.90 |
| -4 | -10 | 4  | 0.40  | 0.83 |
| -4 | -10 | 4  | 0.21  | 0.86 |
| -4 | -10 | 4  | 1.09  | 0.65 |
| -4 | 10  | -4 | 1.32  | 0.83 |
| -4 | -10 | 4  | 1.50  | 0.57 |
| -4 | -10 | 4  | 0.85  | 0.62 |
| 4  | -10 | -4 | -1.47 | 0.89 |
| -4 | -10 | 4  | 1.98  | 0.84 |
| -4 | 10  | -4 | 0.68  | 0.75 |
| -5 | -10 | -4 | 17.21 | 1.22 |
| -5 | 10  | 4  | 14.92 | 1.62 |
| -5 | -10 | -4 | 15.24 | 1.29 |
| -5 | -10 | -4 | 17.56 | 1.54 |
| -5 | -10 | -4 | 14.35 | 1.36 |
| -5 | -10 | -4 | 15.92 | 1.28 |
| -5 | -10 | -4 | 19.96 | 1.27 |
| -5 | -10 | -4 | 15.87 | 0.94 |
| -5 | -10 | -4 | 16.74 | 1.53 |
| -5 | 10  | 4  | 16.68 | 1.29 |
| 5  | -10 | 4  | 15.19 | 1.22 |

## CIF S3

|    |     |    |       |      |
|----|-----|----|-------|------|
| -5 | -10 | -4 | 15.95 | 1.29 |
| -5 | 10  | 4  | 16.66 | 1.37 |
| -5 | 10  | 4  | 14.40 | 1.21 |
| -5 | 10  | -4 | 15.64 | 1.58 |
| -5 | -10 | 4  | 17.07 | 1.39 |
| -5 | -10 | 4  | 15.31 | 1.03 |
| -5 | -10 | 4  | 15.40 | 1.06 |
| -5 | -10 | 4  | 14.89 | 1.10 |
| -5 | -10 | 4  | 15.17 | 1.05 |
| -5 | -10 | 4  | 15.09 | 1.49 |
| 5  | -10 | -4 | 16.08 | 1.59 |
| -5 | -10 | 4  | 16.68 | 1.12 |
| -5 | -10 | 4  | 16.56 | 1.55 |
| -6 | 10  | 4  | 0.99  | 0.58 |
| -6 | -10 | -4 | 0.55  | 0.61 |
| -6 | -10 | -4 | 1.15  | 0.54 |
| -6 | -10 | -4 | 1.92  | 0.61 |
| -6 | -10 | -4 | 2.18  | 0.93 |
| -6 | 10  | 4  | 1.25  | 0.65 |
| -6 | 10  | 4  | 1.03  | 0.57 |
| -6 | 10  | 4  | 1.42  | 0.54 |
| 6  | -10 | 4  | 1.22  | 0.51 |
| -6 | 10  | 4  | 1.25  | 0.74 |
| -6 | -10 | -4 | 1.24  | 0.92 |
| -6 | 10  | 4  | 1.23  | 0.67 |
| -6 | -10 | -4 | 1.12  | 0.58 |
| -6 | 10  | 4  | 0.92  | 0.59 |
| -6 | 10  | -4 | 1.20  | 0.67 |
| -6 | -10 | 4  | 1.75  | 0.35 |
| -6 | 10  | -4 | 1.17  | 0.91 |
| -6 | -10 | 4  | 1.18  | 0.69 |
| 6  | -10 | -4 | 1.38  | 0.87 |
| -6 | 10  | -4 | 1.40  | 0.69 |
| -6 | -10 | 4  | 0.95  | 0.86 |
| -6 | 10  | -4 | 0.96  | 0.40 |
| -6 | -10 | 4  | 1.49  | 0.39 |
| -7 | 10  | 4  | 2.54  | 0.62 |
| -7 | 10  | 4  | 1.59  | 0.53 |
| -7 | -10 | -4 | 2.68  | 0.70 |
| 7  | -10 | 4  | 1.84  | 0.46 |
| -7 | 10  | 4  | 1.96  | 0.61 |

## CIF S3

|    |     |    |       |      |
|----|-----|----|-------|------|
| -7 | -10 | -4 | 1.69  | 0.47 |
| -7 | 10  | 4  | 4.11  | 0.66 |
| -7 | 10  | 4  | 2.23  | 0.52 |
| -7 | 10  | 4  | 1.87  | 0.60 |
| -7 | 10  | 4  | 2.83  | 0.66 |
| -7 | -10 | -4 | 2.56  | 0.70 |
| -7 | -10 | 4  | 1.45  | 0.62 |
| -7 | 10  | -4 | 2.53  | 0.70 |
| -7 | -10 | 4  | 2.15  | 0.34 |
| -7 | 10  | -4 | 3.13  | 0.76 |
| -7 | -10 | 4  | 2.59  | 0.38 |
| -7 | -10 | 4  | 1.75  | 0.35 |
| 7  | -10 | -4 | 3.47  | 1.00 |
| -7 | 10  | -4 | 1.31  | 0.77 |
| -8 | 10  | 4  | 0.56  | 0.30 |
| -8 | 10  | 4  | 0.22  | 0.28 |
| -8 | -10 | -4 | 0.47  | 0.27 |
| -8 | 10  | 4  | 0.25  | 0.31 |
| 8  | -10 | 4  | 0.36  | 0.28 |
| -8 | -10 | -4 | 0.68  | 0.33 |
| -8 | 10  | -4 | -0.01 | 0.42 |
| -8 | 10  | -4 | 0.26  | 0.48 |
| -8 | 10  | -4 | 0.17  | 0.35 |
| 8  | -10 | -4 | 0.35  | 0.47 |
| -8 | 10  | -4 | -0.28 | 0.31 |
| 0  | -11 | 4  | 49.83 | 2.81 |
| 0  | -11 | -4 | 52.90 | 2.85 |
| 0  | -11 | 4  | 50.82 | 2.76 |
| 0  | -11 | 4  | 49.28 | 2.82 |
| 0  | 11  | 4  | 48.89 | 2.87 |
| -1 | -11 | -4 | 1.67  | 0.87 |
| 1  | -11 | 4  | 0.32  | 0.86 |
| 1  | -11 | 4  | -0.28 | 0.72 |
| -1 | -11 | -4 | 0.42  | 0.89 |
| -1 | -11 | -4 | 0.33  | 0.91 |
| 1  | -11 | 4  | 0.61  | 0.86 |
| -1 | 11  | 4  | 0.07  | 0.74 |
| -1 | -11 | 4  | 0.08  | 0.82 |
| -1 | -11 | 4  | 0.34  | 0.79 |
| 1  | -11 | -4 | 0.87  | 1.01 |
| 1  | -11 | -4 | 1.63  | 0.95 |



## CIF S3

|    |     |    |       |      |
|----|-----|----|-------|------|
| -1 | -11 | 4  | 0.00  | 0.74 |
| -2 | 11  | 4  | 1.03  | 0.84 |
| 2  | -11 | 4  | 0.55  | 0.95 |
| -2 | -11 | -4 | 0.96  | 0.85 |
| 2  | -11 | 4  | 1.44  | 1.15 |
| -2 | 11  | 4  | 0.69  | 0.66 |
| 2  | -11 | 4  | 0.12  | 0.84 |
| -2 | -11 | -4 | -0.18 | 0.87 |
| 2  | -11 | 4  | 0.17  | 0.47 |
| -2 | -11 | -4 | 1.14  | 0.70 |
| -2 | -11 | -4 | 1.20  | 0.82 |
| -2 | -11 | -4 | 0.86  | 0.54 |
| -2 | -11 | -4 | 1.36  | 0.82 |
| 2  | -11 | -4 | 2.10  | 1.04 |
| -2 | 11  | -4 | 0.70  | 0.78 |
| -2 | -11 | 4  | 0.95  | 0.60 |
| -2 | -11 | 4  | 1.69  | 1.42 |
| -2 | -11 | 4  | 1.34  | 0.83 |
| 2  | -11 | -4 | 1.22  | 0.67 |
| -2 | -11 | 4  | 0.28  | 0.83 |
| -2 | -11 | 4  | 1.50  | 0.83 |
| -2 | -11 | 4  | 0.49  | 0.81 |
| -2 | -11 | 4  | 0.40  | 0.69 |
| -2 | -11 | 4  | 1.35  | 0.76 |
| -2 | -11 | 4  | 0.30  | 0.65 |
| -3 | -11 | -4 | 17.66 | 1.46 |
| -3 | -11 | -4 | 15.24 | 1.44 |
| -3 | 11  | 4  | 15.66 | 1.24 |
| -3 | -11 | -4 | 14.39 | 1.34 |
| -3 | 11  | 4  | 15.04 | 1.77 |
| -3 | 11  | 4  | 18.91 | 1.39 |
| 3  | -11 | 4  | 15.98 | 1.48 |
| -3 | -11 | -4 | 17.69 | 1.45 |
| -3 | -11 | -4 | 16.44 | 1.31 |
| 3  | -11 | 4  | 13.49 | 1.68 |
| -3 | 11  | 4  | 16.75 | 1.38 |
| -3 | -11 | 4  | 17.65 | 1.51 |
| -3 | -11 | 4  | 16.41 | 1.29 |
| -3 | -11 | 4  | 16.68 | 1.39 |
| -3 | -11 | 4  | 15.51 | 1.23 |
| -3 | -11 | 4  | 16.31 | 1.17 |

## CIF S3

|    |     |    |       |      |
|----|-----|----|-------|------|
| -3 | -11 | 4  | 15.49 | 1.30 |
| -3 | -11 | 4  | 16.11 | 1.26 |
| -3 | 11  | -4 | 15.78 | 1.52 |
| 3  | -11 | -4 | 13.85 | 1.45 |
| -3 | 11  | -4 | 18.38 | 1.47 |
| -3 | -11 | 4  | 15.49 | 1.44 |
| -4 | -11 | -4 | 7.68  | 1.22 |
| -4 | 11  | 4  | 6.25  | 0.93 |
| -4 | 11  | 4  | 6.54  | 1.48 |
| -4 | -11 | -4 | 5.43  | 1.00 |
| -4 | 11  | 4  | 6.49  | 1.15 |
| -4 | -11 | -4 | 6.82  | 1.19 |
| -4 | -11 | -4 | 7.61  | 1.18 |
| -4 | 11  | 4  | 5.67  | 1.00 |
| -4 | -11 | -4 | 4.76  | 1.15 |
| -4 | -11 | -4 | 6.37  | 1.09 |
| -4 | -11 | -4 | 6.51  | 1.27 |
| -4 | 11  | 4  | 7.41  | 0.75 |
| -4 | -11 | -4 | 6.31  | 0.90 |
| -4 | -11 | 4  | 6.75  | 0.87 |
| 4  | -11 | -4 | 8.54  | 1.25 |
| -4 | -11 | 4  | 7.59  | 1.17 |
| -4 | -11 | 4  | 6.43  | 0.99 |
| -4 | -11 | 4  | 7.69  | 1.18 |
| -4 | -11 | 4  | 7.48  | 0.87 |
| -4 | -11 | 4  | 6.18  | 1.20 |
| -5 | -11 | -4 | 8.08  | 1.11 |
| -5 | 11  | 4  | 7.07  | 0.94 |
| -5 | -11 | -4 | 7.68  | 1.24 |
| -5 | -11 | -4 | 7.27  | 1.01 |
| -5 | -11 | -4 | 8.11  | 1.01 |
| -5 | -11 | -4 | 7.99  | 1.19 |
| -5 | 11  | 4  | 6.62  | 0.95 |
| -5 | -11 | -4 | 5.92  | 0.85 |
| -5 | 11  | 4  | 8.31  | 1.38 |
| -5 | 11  | 4  | 9.47  | 1.05 |
| -5 | -11 | -4 | 5.98  | 1.13 |
| -5 | -11 | 4  | 6.91  | 0.73 |
| 5  | -11 | -4 | 7.65  | 1.15 |
| -5 | -11 | 4  | 6.10  | 0.79 |
| -5 | -11 | 4  | 8.14  | 1.12 |

## CIF S3

|    |     |    |       |      |
|----|-----|----|-------|------|
| -5 | -11 | 4  | 8.19  | 1.28 |
| -5 | 11  | -4 | 8.53  | 1.32 |
| -5 | -11 | 4  | 7.09  | 0.76 |
| -5 | -11 | 4  | 6.77  | 0.65 |
| -6 | 11  | 4  | 3.23  | 0.73 |
| -6 | 11  | 4  | 1.93  | 0.56 |
| -6 | 11  | 4  | 3.17  | 0.72 |
| -6 | 11  | 4  | 4.27  | 0.88 |
| -6 | 11  | 4  | 4.01  | 0.88 |
| -6 | -11 | -4 | 3.15  | 0.79 |
| -6 | 11  | 4  | 3.32  | 0.70 |
| -6 | -11 | -4 | 3.09  | 0.81 |
| -6 | -11 | -4 | 2.47  | 0.49 |
| -6 | 11  | 4  | 3.21  | 0.76 |
| -6 | -11 | 4  | 3.24  | 0.53 |
| -6 | 11  | -4 | 3.17  | 0.55 |
| 6  | -11 | -4 | 4.13  | 0.99 |
| -6 | -11 | 4  | 1.00  | 0.62 |
| -6 | 11  | -4 | 1.33  | 0.53 |
| -6 | 11  | -4 | 2.63  | 0.83 |
| -6 | 11  | -4 | 2.63  | 0.65 |
| -7 | 11  | 4  | 2.34  | 0.53 |
| -7 | 11  | 4  | 2.61  | 0.63 |
| -7 | 11  | 4  | 2.74  | 0.55 |
| -7 | 11  | 4  | 2.76  | 0.56 |
| -7 | 11  | 4  | 3.38  | 0.64 |
| -7 | -11 | -4 | 1.97  | 0.38 |
| -7 | -11 | -4 | 2.59  | 0.53 |
| -7 | 11  | 4  | 0.64  | 0.61 |
| -7 | -11 | -4 | 3.67  | 0.67 |
| 7  | -11 | -4 | 2.99  | 0.80 |
| -7 | 11  | -4 | 2.83  | 0.68 |
| -7 | -11 | 4  | 3.07  | 0.27 |
| -7 | 11  | -4 | 1.24  | 0.46 |
| 0  | -12 | 4  | 24.57 | 1.83 |
| 0  | -12 | 4  | 23.15 | 1.55 |
| 0  | -12 | 4  | 21.81 | 1.61 |
| 0  | -12 | 4  | 23.71 | 1.63 |
| 0  | -12 | -4 | 22.59 | 1.68 |
| 0  | -12 | 4  | 22.80 | 1.65 |
| 0  | -12 | -4 | 22.37 | 1.72 |

## CIF S3

|    |     |    |       |      |
|----|-----|----|-------|------|
| 0  | -12 | 4  | 21.36 | 2.01 |
| 0  | -12 | 4  | 25.39 | 1.93 |
| -1 | -12 | -4 | 2.31  | 0.88 |
| 1  | -12 | 4  | 1.02  | 0.54 |
| 1  | -12 | 4  | -0.28 | 1.15 |
| -1 | -12 | -4 | 3.07  | 0.94 |
| 1  | -12 | 4  | 0.79  | 0.85 |
| -1 | -12 | -4 | 4.02  | 1.47 |
| 1  | -12 | 4  | 4.41  | 1.23 |
| 1  | -12 | 4  | 1.44  | 0.90 |
| 1  | -12 | 4  | 3.66  | 1.05 |
| -1 | -12 | 4  | 3.04  | 0.70 |
| -1 | -12 | 4  | 2.78  | 0.79 |
| -1 | -12 | 4  | 1.88  | 1.05 |
| -1 | -12 | 4  | 2.05  | 0.75 |
| 1  | -12 | -4 | 2.07  | 0.88 |
| -1 | -12 | 4  | 1.67  | 0.89 |
| 1  | -12 | -4 | 1.63  | 0.63 |
| -1 | -12 | 4  | 1.93  | 0.76 |
| -1 | -12 | 4  | 3.29  | 0.95 |
| -2 | -12 | -4 | 1.52  | 0.89 |
| -2 | -12 | -4 | 1.62  | 0.81 |
| 2  | -12 | 4  | 0.72  | 0.44 |
| -2 | -12 | -4 | 1.79  | 0.91 |
| 2  | -12 | 4  | 1.79  | 1.00 |
| -2 | -12 | -4 | 0.85  | 0.55 |
| -2 | 12  | 4  | 1.01  | 0.64 |
| 2  | -12 | 4  | 1.09  | 0.95 |
| 2  | -12 | -4 | 1.87  | 0.73 |
| -2 | -12 | 4  | 1.38  | 0.51 |
| -2 | -12 | 4  | 1.35  | 0.61 |
| -2 | -12 | 4  | 0.30  | 0.82 |
| -2 | -12 | 4  | 0.38  | 0.77 |
| -2 | -12 | 4  | 0.80  | 0.82 |
| -2 | -12 | 4  | 1.52  | 1.18 |
| -2 | -12 | 4  | 1.29  | 0.80 |
| -2 | -12 | 4  | 0.57  | 0.69 |
| -2 | -12 | 4  | 1.15  | 0.71 |
| 3  | -12 | 4  | 1.31  | 0.93 |
| -3 | -12 | -4 | -0.26 | 0.84 |
| -3 | -12 | -4 | 0.58  | 0.54 |

## CIF S3

|    |     |    |       |      |
|----|-----|----|-------|------|
| -3 | 12  | 4  | -0.06 | 0.60 |
| -3 | 12  | 4  | 1.14  | 1.08 |
| -3 | -12 | -4 | 1.12  | 0.71 |
| -3 | -12 | -4 | 0.78  | 0.75 |
| -3 | -12 | -4 | 3.00  | 1.04 |
| -3 | -12 | -4 | 0.97  | 0.80 |
| 3  | -12 | -4 | 1.44  | 0.76 |
| -3 | -12 | 4  | -1.12 | 0.68 |
| 3  | -12 | -4 | 1.19  | 0.56 |
| -3 | -12 | 4  | 0.86  | 0.72 |
| -3 | -12 | 4  | 0.59  | 0.83 |
| -3 | -12 | 4  | 1.50  | 0.79 |
| -3 | -12 | 4  | 1.42  | 0.57 |
| -3 | -12 | 4  | 1.25  | 0.59 |
| -3 | -12 | 4  | 0.97  | 0.78 |
| -3 | -12 | 4  | 0.95  | 0.59 |
| -4 | -12 | -4 | 1.95  | 0.68 |
| -4 | 12  | 4  | 0.71  | 0.69 |
| -4 | -12 | -4 | 1.17  | 0.70 |
| -4 | 12  | 4  | 1.07  | 0.34 |
| -4 | 12  | 4  | 3.02  | 0.97 |
| -4 | -12 | -4 | -0.62 | 0.67 |
| -4 | -12 | -4 | 0.26  | 0.44 |
| -4 | -12 | -4 | 1.01  | 0.64 |
| -4 | 12  | 4  | 0.82  | 0.58 |
| -4 | 12  | 4  | 0.95  | 0.65 |
| -4 | -12 | -4 | 0.55  | 0.54 |
| -4 | -12 | -4 | 0.08  | 0.77 |
| -4 | -12 | 4  | 1.41  | 0.68 |
| -4 | -12 | 4  | 0.09  | 0.99 |
| -4 | -12 | 4  | 0.30  | 0.57 |
| -4 | -12 | 4  | 1.18  | 0.84 |
| -4 | -12 | 4  | 0.76  | 0.50 |
| 4  | -12 | -4 | 0.87  | 0.56 |
| -4 | -12 | 4  | 0.35  | 0.53 |
| -5 | 12  | 4  | 5.94  | 0.80 |
| -5 | 12  | 4  | 6.85  | 0.81 |
| -5 | -12 | -4 | 6.32  | 0.85 |
| -5 | -12 | -4 | 7.19  | 0.91 |
| -5 | 12  | 4  | 7.56  | 0.94 |
| -5 | -12 | -4 | 7.16  | 0.96 |

## CIF S3

|    |     |    |       |      |
|----|-----|----|-------|------|
| -5 | -12 | -4 | 8.03  | 1.98 |
| -5 | 12  | 4  | 6.95  | 0.87 |
| -5 | -12 | -4 | 5.89  | 0.90 |
| -5 | 12  | 4  | 6.88  | 1.09 |
| -5 | -12 | -4 | 5.11  | 0.77 |
| 5  | -12 | -4 | 6.93  | 0.91 |
| -5 | -12 | 4  | 7.89  | 0.76 |
| -5 | -12 | 4  | 4.65  | 0.94 |
| -5 | -12 | 4  | 8.30  | 0.66 |
| -5 | 12  | -4 | 7.13  | 0.64 |
| -5 | 12  | -4 | 4.96  | 1.21 |
| -5 | -12 | 4  | 7.88  | 0.72 |
| -6 | 12  | 4  | 2.21  | 0.54 |
| -6 | -12 | -4 | 1.17  | 0.44 |
| -6 | 12  | 4  | 2.01  | 0.54 |
| -6 | 12  | 4  | 1.51  | 0.49 |
| -6 | -12 | -4 | 1.33  | 0.38 |
| -6 | 12  | 4  | 1.13  | 0.43 |
| -6 | 12  | 4  | 3.02  | 0.85 |
| -6 | -12 | -4 | 0.94  | 0.53 |
| -6 | -12 | 4  | 1.38  | 0.41 |
| -6 | -12 | 4  | 2.06  | 0.40 |
| 6  | -12 | -4 | 1.38  | 0.40 |
| -6 | 12  | -4 | 2.64  | 0.74 |
| -6 | 12  | -4 | 0.67  | 0.73 |
| 0  | -13 | 4  | 0.29  | 0.49 |
| 0  | -13 | -4 | 0.24  | 0.80 |
| 0  | -13 | 4  | -0.61 | 0.68 |
| 0  | -13 | 4  | 0.24  | 0.84 |
| 0  | -13 | 4  | 0.01  | 0.90 |
| 0  | -13 | 4  | 0.76  | 0.78 |
| 0  | -13 | 4  | -0.93 | 0.72 |
| 0  | -13 | 4  | 0.48  | 0.70 |
| -1 | -13 | -4 | -0.37 | 0.77 |
| -1 | -13 | -4 | 1.05  | 0.85 |
| -1 | -13 | -4 | -0.03 | 0.43 |
| 1  | -13 | 4  | -0.31 | 0.69 |
| 1  | -13 | 4  | -0.03 | 0.45 |
| 1  | -13 | 4  | 0.24  | 0.89 |
| 1  | -13 | 4  | -0.68 | 0.75 |
| 1  | -13 | 4  | 1.18  | 0.94 |

## CIF S3

|    |     |    |       |      |
|----|-----|----|-------|------|
| 1  | -13 | -4 | -0.56 | 0.97 |
| -1 | -13 | 4  | 0.67  | 0.65 |
| 1  | -13 | -4 | -0.75 | 0.95 |
| -1 | -13 | 4  | 0.24  | 0.62 |
| -1 | -13 | 4  | 0.60  | 0.80 |
| -1 | -13 | 4  | -0.27 | 0.91 |
| -1 | -13 | 4  | -0.94 | 0.75 |
| -1 | -13 | 4  | -0.88 | 1.05 |
| -1 | -13 | 4  | 0.29  | 0.57 |
| -1 | -13 | 4  | -1.00 | 0.69 |
| -1 | -13 | 4  | 0.17  | 0.54 |
| -2 | -13 | -4 | 1.57  | 0.91 |
| -2 | -13 | -4 | 0.73  | 0.47 |
| -2 | -13 | -4 | 0.74  | 0.70 |
| 2  | -13 | 4  | 1.80  | 0.75 |
| -2 | -13 | -4 | 0.48  | 0.76 |
| -2 | -13 | -4 | 1.66  | 0.70 |
| -2 | -13 | -4 | 0.92  | 0.73 |
| 2  | -13 | 4  | 1.41  | 0.84 |
| 2  | -13 | 4  | 1.81  | 0.87 |
| -2 | -13 | 4  | 1.57  | 1.06 |
| -2 | -13 | 4  | 1.91  | 0.70 |
| -2 | -13 | 4  | 3.40  | 0.83 |
| -2 | -13 | 4  | 1.32  | 1.30 |
| -2 | -13 | 4  | 1.55  | 0.62 |
| -2 | -13 | 4  | 0.94  | 0.61 |
| 2  | -13 | -4 | 2.69  | 1.01 |
| -2 | -13 | 4  | 1.28  | 0.67 |
| -3 | 13  | 4  | 0.67  | 1.00 |
| 3  | -13 | 4  | 0.25  | 0.77 |
| -3 | 13  | 4  | 0.39  | 0.55 |
| -3 | 13  | 4  | 0.28  | 0.43 |
| -3 | -13 | -4 | 1.10  | 0.73 |
| -3 | -13 | -4 | 0.49  | 0.55 |
| -3 | -13 | -4 | 0.24  | 0.64 |
| -3 | -13 | -4 | 0.26  | 0.45 |
| -3 | -13 | -4 | 0.40  | 0.65 |
| -3 | -13 | 4  | 0.22  | 0.59 |
| -3 | -13 | 4  | -0.26 | 0.56 |
| -3 | -13 | 4  | -0.78 | 0.50 |
| -3 | -13 | 4  | -0.10 | 0.51 |

## CIF S3

|    |     |    |       |      |
|----|-----|----|-------|------|
| 3  | -13 | -4 | -0.25 | 0.58 |
| -4 | 13  | 4  | 0.63  | 0.43 |
| -4 | -13 | -4 | -0.52 | 0.50 |
| -4 | 13  | 4  | 0.16  | 0.66 |
| -4 | -13 | -4 | -0.65 | 0.56 |
| -4 | -13 | -4 | 0.04  | 0.40 |
| -4 | -13 | -4 | -0.14 | 0.68 |
| -4 | -13 | -4 | -0.19 | 0.52 |
| -4 | 13  | 4  | -0.37 | 0.83 |
| -4 | -13 | 4  | 0.04  | 0.42 |
| -4 | -13 | 4  | 0.00  | 0.44 |
| -4 | -13 | 4  | 0.13  | 0.59 |
| 4  | -13 | -4 | 0.53  | 0.56 |
| -4 | -13 | 4  | -0.05 | 0.37 |
| -5 | -13 | -4 | 3.43  | 0.74 |
| -5 | 13  | 4  | 4.61  | 0.55 |
| -5 | -13 | -4 | 4.53  | 1.03 |
| -5 | 13  | 4  | 3.94  | 0.60 |
| -5 | 13  | 4  | 3.99  | 0.71 |
| -5 | 13  | 4  | 2.83  | 0.86 |
| -5 | -13 | -4 | 3.22  | 0.69 |
| -5 | -13 | -4 | 2.47  | 0.62 |
| -5 | 13  | -4 | 3.92  | 0.97 |
| -5 | 13  | -4 | 3.73  | 0.46 |
| -5 | -13 | 4  | 4.53  | 0.58 |
| -5 | -13 | 4  | 5.22  | 0.53 |
| 0  | -14 | 4  | 0.93  | 0.63 |
| 0  | -14 | 4  | 0.24  | 0.58 |
| 0  | -14 | -4 | 1.05  | 0.85 |
| 0  | -14 | 4  | 0.44  | 0.41 |
| 0  | -14 | 4  | 1.47  | 0.55 |
| 0  | -14 | 4  | 1.35  | 0.72 |
| 0  | -14 | 4  | 0.86  | 0.76 |
| 0  | -14 | -4 | 0.43  | 0.61 |
| -1 | -14 | -4 | -0.37 | 0.80 |
| 1  | -14 | 4  | 0.04  | 0.73 |
| 1  | -14 | 4  | 0.38  | 0.57 |
| -1 | -14 | -4 | -0.58 | 0.66 |
| -1 | -14 | -4 | -0.04 | 0.89 |
| 1  | -14 | 4  | -0.09 | 0.83 |
| 1  | -14 | 4  | 0.64  | 0.62 |



## CIF S3

|    |     |    |       |      |
|----|-----|----|-------|------|
| 1  | -14 | 4  | -0.08 | 0.69 |
| -1 | -14 | -4 | 0.61  | 0.83 |
| -1 | -14 | -4 | 1.21  | 0.65 |
| -1 | -14 | 4  | 0.07  | 0.59 |
| -1 | -14 | 4  | -0.09 | 0.41 |
| -1 | -14 | 4  | 0.48  | 0.57 |
| -1 | -14 | 4  | -0.29 | 0.61 |
| -1 | -14 | 4  | 0.51  | 0.69 |
| -1 | -14 | 4  | 0.00  | 0.54 |
| -1 | -14 | 4  | 0.73  | 0.57 |
| 1  | -14 | -4 | 0.60  | 0.88 |
| -2 | -14 | -4 | 2.25  | 0.87 |
| 2  | -14 | 4  | 1.26  | 0.70 |
| 2  | -14 | 4  | 1.54  | 0.72 |
| -2 | -14 | -4 | 1.57  | 0.55 |
| -2 | -14 | -4 | 1.84  | 0.61 |
| -2 | -14 | -4 | 1.02  | 0.75 |
| -2 | -14 | -4 | 1.02  | 0.65 |
| -2 | -14 | 4  | 1.50  | 0.49 |
| -2 | -14 | 4  | 1.41  | 0.53 |
| -2 | -14 | 4  | 0.66  | 0.40 |
| -2 | -14 | 4  | 2.13  | 0.54 |
| 2  | -14 | -4 | 0.74  | 0.81 |
| -2 | -14 | 4  | 1.13  | 0.52 |
| -3 | -14 | -4 | -0.08 | 0.54 |
| -3 | -14 | -4 | 1.37  | 0.75 |
| -3 | 14  | 4  | 0.39  | 0.25 |
| -3 | 14  | 4  | 0.18  | 0.76 |
| 3  | -14 | 4  | 1.09  | 0.65 |
| -3 | -14 | -4 | 0.52  | 0.33 |
| 3  | -14 | 4  | 0.86  | 0.61 |
| -3 | -14 | 4  | 0.60  | 0.40 |
| -3 | -14 | 4  | 1.07  | 0.46 |
| -3 | -14 | 4  | 0.95  | 0.51 |
| -3 | -14 | 4  | 0.18  | 0.45 |
| -4 | -14 | -4 | 4.54  | 0.83 |
| -4 | -14 | -4 | 3.71  | 0.71 |
| -4 | 14  | 4  | 3.01  | 0.50 |
| -4 | -14 | -4 | 3.83  | 0.67 |
| -4 | -14 | -4 | 4.44  | 0.83 |
| -4 | -14 | -4 | 4.30  | 0.63 |

## CIF S3

|    |     |    |       |      |
|----|-----|----|-------|------|
| -4 | 14  | 4  | 2.80  | 0.76 |
| -4 | 14  | 4  | 3.75  | 0.74 |
| -4 | -14 | 4  | 5.52  | 0.59 |
| -4 | 14  | -4 | 3.55  | 0.45 |
| -4 | -14 | 4  | 3.86  | 0.47 |
| 0  | -15 | -4 | 1.38  | 0.61 |
| 0  | -15 | -4 | 1.07  | 0.60 |
| 0  | -15 | 4  | 0.64  | 0.51 |
| 0  | -15 | 4  | 1.63  | 0.49 |
| 0  | -15 | 4  | 1.00  | 0.42 |
| 1  | -15 | 4  | 1.72  | 0.56 |
| 1  | -15 | 4  | 2.30  | 0.67 |
| -1 | -15 | -4 | 1.42  | 0.47 |
| -1 | -15 | -4 | 0.75  | 0.55 |
| 1  | -15 | 4  | 0.70  | 0.44 |
| -1 | -15 | -4 | 1.99  | 0.63 |
| -1 | -15 | 4  | 1.26  | 0.43 |
| -1 | -15 | 4  | 1.65  | 0.40 |
| -1 | -15 | 4  | 3.01  | 0.67 |
| -1 | -15 | 4  | 2.73  | 0.48 |
| 1  | -15 | -4 | 1.76  | 0.54 |
| -1 | -15 | 4  | 3.53  | 0.73 |
| -1 | -15 | 4  | 1.34  | 0.41 |
| 1  | -15 | -4 | 1.22  | 0.58 |
| -2 | -15 | -4 | 0.10  | 0.49 |
| -2 | -15 | -4 | 0.85  | 0.50 |
| 2  | -15 | 4  | 0.67  | 0.56 |
| -2 | 15  | 4  | 1.41  | 0.36 |
| 2  | -15 | 4  | 0.38  | 0.49 |
| 2  | -15 | 4  | 0.43  | 0.46 |
| -2 | -15 | -4 | 0.66  | 0.42 |
| 2  | -15 | -4 | 0.97  | 0.68 |
| -2 | -15 | 4  | 2.24  | 0.74 |
| -2 | -15 | 4  | 0.65  | 0.34 |
| -2 | -15 | 4  | 0.70  | 0.38 |
| -2 | -15 | 4  | 1.05  | 0.41 |
| 0  | 0   | 5  | -0.08 | 0.47 |
| 0  | 0   | 5  | 0.00  | 0.56 |
| 0  | 0   | 5  | -0.13 | 0.61 |
| 0  | 0   | -5 | 0.05  | 0.55 |
| 0  | 0   | -5 | 0.68  | 0.56 |

## CIF S3

|    |   |    |        |      |
|----|---|----|--------|------|
| 1  | 0 | -5 | 159.84 | 8.31 |
| -1 | 0 | -5 | 164.31 | 8.38 |
| 1  | 0 | -5 | 161.34 | 8.13 |
| -1 | 0 | 5  | 162.51 | 8.26 |
| 1  | 0 | -5 | 174.34 | 8.32 |
| -1 | 0 | -5 | 172.48 | 8.41 |
| 1  | 0 | 5  | 159.69 | 8.42 |
| 1  | 0 | 5  | 161.86 | 8.48 |
| -1 | 0 | 5  | 166.19 | 8.27 |
| -1 | 0 | -5 | 169.26 | 8.46 |
| 1  | 0 | 5  | 163.12 | 8.40 |
| 1  | 0 | -5 | 183.81 | 8.27 |
| 2  | 0 | -5 | 65.70  | 3.27 |
| 2  | 0 | 5  | 64.00  | 3.60 |
| 2  | 0 | -5 | 59.17  | 3.16 |
| 2  | 0 | -5 | 63.52  | 3.10 |
| -2 | 0 | -5 | 64.13  | 3.52 |
| 2  | 0 | 5  | 62.22  | 3.65 |
| 2  | 0 | -5 | 64.45  | 3.12 |
| -2 | 0 | 5  | 64.45  | 3.25 |
| -2 | 0 | 5  | 58.85  | 3.17 |
| -2 | 0 | -5 | 65.45  | 3.55 |
| -2 | 0 | -5 | 65.96  | 3.28 |
| -2 | 0 | 5  | 61.67  | 3.22 |
| 3  | 0 | 5  | 10.39  | 1.45 |
| -3 | 0 | 5  | 9.10   | 0.69 |
| -3 | 0 | 5  | 9.72   | 0.71 |
| 3  | 0 | 5  | 8.29   | 0.79 |
| -3 | 0 | 5  | 8.74   | 0.47 |
| 3  | 0 | 5  | 8.34   | 1.18 |
| -3 | 0 | -5 | 7.76   | 1.21 |
| 3  | 0 | -5 | 8.13   | 0.57 |
| -3 | 0 | -5 | 10.15  | 0.97 |
| -4 | 0 | -5 | 60.22  | 3.24 |
| -4 | 0 | 5  | 61.22  | 3.02 |
| 4  | 0 | 5  | 61.28  | 3.18 |
| -4 | 0 | 5  | 60.93  | 2.96 |
| -4 | 0 | 5  | 60.63  | 3.02 |
| 4  | 0 | 5  | 55.89  | 3.62 |
| -4 | 0 | -5 | 58.62  | 3.14 |
| 4  | 0 | 5  | 64.32  | 3.81 |

## CIF S3

|     |    |    |       |      |
|-----|----|----|-------|------|
| -5  | 0  | -5 | 2.65  | 0.58 |
| -5  | 0  | 5  | 2.85  | 0.29 |
| 5   | 0  | 5  | 2.75  | 0.68 |
| 5   | 0  | -5 | 2.81  | 0.29 |
| -5  | 0  | -5 | 2.25  | 0.62 |
| 5   | 0  | 5  | 3.43  | 1.27 |
| -5  | 0  | -5 | 3.94  | 1.08 |
| -6  | 0  | -5 | 17.33 | 1.50 |
| 6   | 0  | -5 | 17.84 | 1.00 |
| 6   | 0  | 5  | 18.62 | 1.31 |
| -6  | 0  | 5  | 18.09 | 0.96 |
| -6  | 0  | -5 | 17.17 | 1.10 |
| -7  | 0  | -5 | -0.26 | 0.50 |
| -7  | 0  | 5  | -0.02 | 0.27 |
| 7   | 0  | 5  | -0.31 | 0.57 |
| -7  | 0  | -5 | 0.63  | 0.45 |
| -8  | 0  | -5 | 6.62  | 0.75 |
| -8  | 0  | 5  | 5.66  | 0.40 |
| -8  | 0  | 5  | 5.40  | 0.51 |
| -8  | 0  | -5 | 5.14  | 0.79 |
| -8  | 0  | 5  | 6.13  | 0.44 |
| -8  | 0  | -5 | 4.18  | 1.02 |
| -8  | 0  | -5 | 6.24  | 0.79 |
| -8  | 0  | -5 | 5.45  | 0.79 |
| -8  | 0  | -5 | 5.17  | 0.91 |
| -8  | 0  | 5  | 6.20  | 0.42 |
| -8  | 0  | -5 | 7.91  | 0.87 |
| -8  | 0  | -5 | 6.25  | 0.84 |
| -9  | 0  | -5 | 8.26  | 1.22 |
| -9  | 0  | -5 | 7.94  | 1.28 |
| -9  | 0  | -5 | 7.57  | 0.85 |
| -9  | 0  | -5 | 7.93  | 0.81 |
| -9  | 0  | -5 | 8.33  | 0.79 |
| -9  | 0  | -5 | 7.78  | 0.73 |
| -10 | 0  | -5 | 0.02  | 0.27 |
| -10 | 0  | -5 | 0.22  | 0.35 |
| -10 | 0  | -5 | -0.39 | 0.32 |
| 0   | -1 | -5 | 0.85  | 0.58 |
| 0   | -1 | 5  | 0.28  | 0.58 |
| 0   | 1  | 5  | -0.01 | 0.61 |
| 0   | -1 | 5  | 0.81  | 0.51 |

## CIF S3

|    |    |    |       |      |
|----|----|----|-------|------|
| 0  | 1  | 5  | 0.25  | 0.64 |
| 0  | 1  | -5 | 0.10  | 0.52 |
| 0  | -1 | 5  | 0.35  | 0.60 |
| 0  | 1  | 5  | 0.47  | 0.63 |
| 0  | 1  | 5  | 0.70  | 0.51 |
| 0  | -1 | -5 | 0.26  | 0.67 |
| 0  | 1  | -5 | 0.45  | 0.54 |
| 1  | -1 | 5  | 29.16 | 1.89 |
| -1 | 1  | 5  | 28.93 | 1.67 |
| 1  | 1  | -5 | 29.47 | 1.67 |
| -1 | -1 | -5 | 28.23 | 1.84 |
| -1 | 1  | 5  | 25.62 | 1.67 |
| 1  | 1  | -5 | 25.40 | 1.50 |
| 1  | 1  | -5 | 25.85 | 1.44 |
| 1  | 1  | -5 | 27.19 | 1.64 |
| 1  | -1 | 5  | 29.81 | 1.83 |
| 1  | -1 | 5  | 30.11 | 1.90 |
| -1 | 1  | 5  | 30.04 | 1.69 |
| -1 | -1 | -5 | 30.14 | 1.92 |
| 1  | -1 | -5 | 24.15 | 1.46 |
| 1  | -1 | -5 | 28.25 | 1.78 |
| -1 | -1 | 5  | 26.85 | 1.60 |
| 1  | -1 | -5 | 25.45 | 1.51 |
| 1  | 1  | 5  | 29.62 | 2.02 |
| 1  | -1 | -5 | 27.15 | 1.54 |
| 1  | -1 | -5 | 28.89 | 1.77 |
| -1 | 1  | -5 | 30.32 | 1.86 |
| -1 | 1  | -5 | 29.93 | 1.81 |
| 1  | 1  | 5  | 28.69 | 1.85 |
| -1 | 1  | -5 | 28.09 | 1.80 |
| -1 | -1 | 5  | 27.98 | 1.62 |
| 2  | 1  | -5 | 19.13 | 0.95 |
| -2 | -1 | -5 | 18.72 | 1.24 |
| -2 | -1 | -5 | 19.86 | 1.53 |
| 2  | 1  | -5 | 18.86 | 1.09 |
| -2 | -1 | -5 | 20.87 | 1.54 |
| -2 | 1  | 5  | 21.42 | 1.22 |
| 2  | -1 | 5  | 18.36 | 1.62 |
| -2 | 1  | 5  | 18.90 | 1.12 |
| -2 | 1  | 5  | 16.52 | 1.18 |
| 2  | 1  | -5 | 16.77 | 1.00 |

## CIF S3

|    |    |    |       |      |
|----|----|----|-------|------|
| 2  | -1 | 5  | 17.58 | 1.52 |
| 2  | -1 | -5 | 17.26 | 1.13 |
| 2  | -1 | -5 | 19.61 | 1.02 |
| 2  | 1  | 5  | 18.00 | 1.51 |
| 2  | -1 | -5 | 19.10 | 1.45 |
| -2 | -1 | 5  | 19.14 | 1.12 |
| -2 | 1  | -5 | 18.06 | 1.45 |
| -2 | 1  | -5 | 19.85 | 1.57 |
| -2 | 1  | -5 | 16.28 | 1.22 |
| 2  | -1 | -5 | 19.14 | 1.03 |
| 2  | 1  | 5  | 20.64 | 1.70 |
| -2 | -1 | 5  | 19.21 | 1.11 |
| 3  | -1 | 5  | 32.64 | 2.23 |
| 3  | -1 | 5  | 29.21 | 2.23 |
| -3 | -1 | -5 | 33.09 | 2.12 |
| -3 | 1  | 5  | 28.36 | 1.72 |
| -3 | 1  | 5  | 28.98 | 1.76 |
| 3  | -1 | 5  | 29.94 | 1.70 |
| -3 | -1 | -5 | 28.84 | 1.80 |
| -3 | 1  | 5  | 30.77 | 1.60 |
| -3 | -1 | 5  | 29.95 | 1.55 |
| 3  | -1 | -5 | 30.02 | 1.66 |
| 3  | 1  | 5  | 29.73 | 2.23 |
| 3  | 1  | 5  | 30.03 | 1.70 |
| -3 | 1  | -5 | 32.08 | 2.14 |
| -3 | 1  | -5 | 30.45 | 2.47 |
| 3  | -1 | -5 | 30.51 | 1.56 |
| 3  | -1 | -5 | 30.53 | 1.54 |
| 3  | -1 | -5 | 30.06 | 1.63 |
| -3 | 1  | -5 | 28.28 | 1.76 |
| 3  | 1  | 5  | 29.06 | 2.13 |
| -4 | 1  | 5  | 4.21  | 0.34 |
| 4  | -1 | 5  | 3.92  | 1.19 |
| -4 | 1  | 5  | 4.08  | 0.45 |
| 4  | -1 | 5  | 3.48  | 0.73 |
| -4 | -1 | -5 | 3.32  | 0.68 |
| -4 | 1  | 5  | 2.58  | 0.61 |
| -4 | -1 | -5 | 3.77  | 0.90 |
| 4  | -1 | 5  | 3.30  | 1.30 |
| 4  | 1  | 5  | 3.89  | 0.59 |
| -4 | 1  | -5 | 3.79  | 0.65 |

## CIF S3

|    |    |    |       |      |
|----|----|----|-------|------|
| -4 | 1  | -5 | 3.32  | 0.59 |
| 4  | 1  | 5  | 3.75  | 1.03 |
| 4  | 1  | 5  | 3.44  | 1.26 |
| 4  | -1 | -5 | 4.11  | 0.60 |
| 4  | -1 | -5 | 4.90  | 0.62 |
| 4  | -1 | -5 | 3.68  | 0.40 |
| -4 | 1  | -5 | 4.15  | 0.88 |
| -5 | -1 | -5 | 14.84 | 1.15 |
| -5 | 1  | 5  | 16.82 | 0.93 |
| -5 | -1 | -5 | 16.75 | 1.09 |
| -5 | 1  | 5  | 16.53 | 0.97 |
| -5 | -1 | -5 | 17.30 | 1.39 |
| 5  | -1 | 5  | 17.46 | 1.21 |
| -5 | 1  | -5 | 16.50 | 1.13 |
| 5  | 1  | 5  | 18.95 | 1.22 |
| 5  | -1 | -5 | 18.42 | 1.15 |
| -5 | 1  | -5 | 17.44 | 1.37 |
| -5 | 1  | -5 | 16.92 | 1.18 |
| -5 | -1 | 5  | 17.55 | 0.86 |
| 5  | -1 | -5 | 17.93 | 0.99 |
| 5  | 1  | 5  | 17.14 | 1.95 |
| -5 | 1  | -5 | 17.93 | 1.07 |
| 6  | -1 | 5  | 8.11  | 0.90 |
| -6 | 1  | 5  | 6.93  | 0.60 |
| -6 | -1 | -5 | 6.87  | 1.04 |
| 6  | 1  | -5 | 8.09  | 0.47 |
| -6 | -1 | -5 | 6.28  | 0.75 |
| -6 | -1 | -5 | 6.63  | 0.88 |
| -6 | 1  | 5  | 7.92  | 0.55 |
| 6  | 1  | -5 | 6.86  | 0.50 |
| -6 | 1  | -5 | 7.00  | 0.91 |
| -6 | 1  | -5 | 7.29  | 1.14 |
| -6 | 1  | -5 | 7.79  | 0.72 |
| -6 | -1 | 5  | 7.98  | 0.45 |
| 6  | 1  | 5  | 8.43  | 0.88 |
| 6  | -1 | -5 | 7.47  | 0.62 |
| 7  | -1 | 5  | 1.26  | 0.67 |
| -7 | 1  | 5  | 1.74  | 0.37 |
| -7 | -1 | -5 | 2.74  | 0.68 |
| -7 | -1 | -5 | 0.94  | 0.49 |
| -7 | -1 | -5 | 1.59  | 0.54 |

## CIF S3

|     |    |    |       |      |
|-----|----|----|-------|------|
| -7  | -1 | -5 | 2.41  | 0.83 |
| -7  | -1 | 5  | 2.22  | 0.34 |
| 7   | 1  | 5  | 1.41  | 0.67 |
| -7  | 1  | -5 | 2.71  | 0.62 |
| -7  | 1  | -5 | 1.84  | 0.53 |
| -8  | 1  | 5  | 29.60 | 1.56 |
| -8  | -1 | -5 | 31.74 | 1.73 |
| -8  | -1 | -5 | 32.55 | 1.78 |
| -8  | -1 | -5 | 31.99 | 2.02 |
| -8  | -1 | -5 | 31.06 | 1.81 |
| -8  | -1 | -5 | 30.21 | 1.71 |
| -8  | -1 | -5 | 30.18 | 1.70 |
| -8  | 1  | 5  | 28.34 | 1.61 |
| -8  | 1  | 5  | 31.75 | 1.58 |
| -8  | -1 | -5 | 31.35 | 1.73 |
| -8  | 1  | -5 | 30.06 | 1.71 |
| -8  | 1  | -5 | 31.49 | 1.71 |
| -8  | 1  | -5 | 33.03 | 1.83 |
| -8  | 1  | -5 | 32.20 | 1.95 |
| -8  | -1 | 5  | 26.70 | 1.54 |
| -8  | 1  | -5 | 29.78 | 1.79 |
| -8  | 1  | -5 | 29.76 | 1.71 |
| -8  | 1  | -5 | 31.11 | 1.73 |
| -8  | 1  | -5 | 33.33 | 1.71 |
| -9  | -1 | -5 | 2.14  | 0.80 |
| -9  | -1 | -5 | 1.13  | 0.48 |
| -9  | -1 | -5 | 1.08  | 0.44 |
| -9  | 1  | 5  | 1.47  | 0.24 |
| -9  | -1 | -5 | 1.99  | 0.45 |
| -9  | 1  | 5  | 1.64  | 0.24 |
| -9  | -1 | -5 | 2.35  | 0.58 |
| -9  | 1  | -5 | 0.11  | 0.83 |
| -9  | 1  | -5 | 1.07  | 0.40 |
| -9  | 1  | -5 | 1.86  | 0.57 |
| -9  | 1  | -5 | 1.68  | 0.47 |
| -9  | 1  | -5 | 1.28  | 0.44 |
| -9  | 1  | -5 | 1.47  | 0.45 |
| -10 | -1 | -5 | 5.12  | 0.47 |
| -10 | -1 | -5 | 6.02  | 0.53 |
| -10 | 1  | -5 | 3.83  | 0.60 |
| -10 | 1  | -5 | 4.44  | 0.59 |



## CIF S3

|     |    |    |        |       |
|-----|----|----|--------|-------|
| -10 | 1  | -5 | 5.18   | 0.54  |
| -10 | 1  | -5 | 5.11   | 0.47  |
| 0   | 2  | -5 | 43.42  | 2.51  |
| 0   | -2 | 5  | 42.66  | 2.43  |
| 0   | -2 | -5 | 45.47  | 2.58  |
| 0   | 2  | 5  | 45.14  | 2.67  |
| 0   | 2  | 5  | 43.12  | 2.45  |
| 0   | 2  | -5 | 39.38  | 2.40  |
| 0   | 2  | 5  | 45.29  | 2.58  |
| 0   | -2 | 5  | 38.82  | 2.41  |
| 0   | 2  | 5  | 37.69  | 2.60  |
| 0   | -2 | -5 | 45.13  | 2.32  |
| 0   | 2  | -5 | 45.38  | 2.43  |
| 0   | 2  | -5 | 41.11  | 2.27  |
| 0   | -2 | 5  | 43.73  | 2.46  |
| 1   | 2  | -5 | 195.22 | 10.15 |
| 1   | 2  | -5 | 195.96 | 10.25 |
| -1  | 2  | 5  | 204.44 | 10.37 |
| -1  | 2  | 5  | 204.87 | 10.40 |
| 1   | -2 | 5  | 207.46 | 10.66 |
| 1   | -2 | 5  | 219.39 | 10.48 |
| 1   | 2  | -5 | 197.40 | 10.26 |
| -1  | -2 | -5 | 208.04 | 10.45 |
| 1   | 2  | -5 | 194.31 | 10.28 |
| -1  | -2 | -5 | 221.91 | 10.49 |
| 1   | -2 | 5  | 192.13 | 10.42 |
| -1  | 2  | 5  | 213.34 | 10.30 |
| 1   | -2 | -5 | 201.97 | 10.20 |
| -1  | 2  | -5 | 210.05 | 10.42 |
| 1   | 2  | 5  | 225.27 | 10.60 |
| 1   | 2  | 5  | 232.32 | 10.51 |
| -1  | 2  | -5 | 207.65 | 10.46 |
| -1  | -2 | 5  | 206.89 | 10.26 |
| -1  | 2  | -5 | 204.70 | 10.24 |
| -1  | 2  | -5 | 202.99 | 10.37 |
| 1   | -2 | -5 | 200.14 | 10.16 |
| -1  | -2 | 5  | 206.78 | 10.25 |
| 1   | -2 | -5 | 216.99 | 10.42 |
| 2   | -2 | 5  | 187.88 | 9.52  |
| 2   | 2  | -5 | 177.36 | 9.08  |
| 2   | -2 | 5  | 188.19 | 9.55  |

## CIF S3

|    |    |    |        |      |
|----|----|----|--------|------|
| -2 | -2 | -5 | 186.26 | 9.18 |
| -2 | 2  | 5  | 190.24 | 9.27 |
| -2 | -2 | -5 | 185.53 | 9.46 |
| -2 | -2 | -5 | 183.76 | 9.50 |
| 2  | 2  | -5 | 190.77 | 9.15 |
| -2 | 2  | 5  | 181.65 | 9.15 |
| -2 | 2  | -5 | 178.86 | 9.50 |
| 2  | -2 | -5 | 191.10 | 9.15 |
| -2 | -2 | 5  | 193.89 | 9.16 |
| -2 | 2  | -5 | 178.20 | 9.45 |
| 2  | 2  | 5  | 177.84 | 9.51 |
| 2  | -2 | -5 | 203.69 | 9.21 |
| 2  | -2 | -5 | 182.31 | 9.12 |
| 2  | 2  | 5  | 197.35 | 9.65 |
| -2 | 2  | -5 | 172.36 | 9.18 |
| -2 | -2 | 5  | 194.04 | 9.16 |
| 2  | -2 | -5 | 190.51 | 9.37 |
| 2  | 2  | 5  | 172.75 | 9.15 |
| -3 | -2 | -5 | 80.67  | 4.45 |
| 3  | -2 | 5  | 89.76  | 4.73 |
| -3 | 2  | 5  | 80.74  | 4.32 |
| 3  | -2 | 5  | 79.05  | 4.73 |
| -3 | -2 | -5 | 84.90  | 4.57 |
| -3 | 2  | 5  | 78.37  | 4.20 |
| 3  | -2 | 5  | 85.25  | 4.26 |
| 3  | -2 | -5 | 93.05  | 4.28 |
| -3 | 2  | -5 | 88.93  | 4.65 |
| 3  | -2 | -5 | 88.29  | 4.23 |
| 3  | 2  | 5  | 80.01  | 4.21 |
| -3 | -2 | 5  | 83.01  | 4.11 |
| 3  | -2 | -5 | 82.21  | 4.16 |
| 3  | 2  | 5  | 73.57  | 4.76 |
| 3  | -2 | -5 | 77.77  | 4.13 |
| -3 | 2  | -5 | 90.99  | 4.26 |
| -3 | -2 | 5  | 87.33  | 4.10 |
| 3  | 2  | 5  | 87.72  | 4.69 |
| -3 | 2  | -5 | 75.84  | 4.27 |
| -3 | 2  | -5 | 80.18  | 4.58 |
| -4 | 2  | 5  | 11.28  | 0.89 |
| 4  | -2 | 5  | 10.53  | 0.92 |
| -4 | -2 | -5 | 12.39  | 0.95 |

## CIF S3

|    |    |    |       |      |
|----|----|----|-------|------|
| -4 | 2  | 5  | 10.43 | 0.98 |
| -4 | 2  | 5  | 11.20 | 0.69 |
| -4 | 2  | 5  | 10.07 | 0.72 |
| 4  | -2 | 5  | 12.81 | 1.68 |
| 4  | -2 | -5 | 11.97 | 0.79 |
| -4 | 2  | -5 | 10.30 | 0.96 |
| 4  | -2 | -5 | 11.82 | 0.80 |
| -4 | 2  | -5 | 11.05 | 0.89 |
| 4  | -2 | -5 | 10.43 | 0.99 |
| -4 | 2  | -5 | 11.02 | 1.06 |
| 4  | 2  | 5  | 12.84 | 1.60 |
| 4  | -2 | -5 | 12.14 | 0.93 |
| 4  | 2  | 5  | 12.10 | 0.93 |
| -5 | -2 | -5 | 8.84  | 0.81 |
| -5 | -2 | -5 | 8.90  | 0.96 |
| 5  | -2 | 5  | 10.80 | 1.60 |
| -5 | 2  | 5  | 8.40  | 0.69 |
| 5  | -2 | 5  | 9.70  | 0.90 |
| -5 | -2 | -5 | 8.63  | 0.86 |
| -5 | 2  | 5  | 8.79  | 0.63 |
| -5 | -2 | -5 | 8.78  | 0.78 |
| -5 | 2  | 5  | 8.63  | 0.74 |
| 5  | -2 | -5 | 9.28  | 0.82 |
| 5  | -2 | -5 | 9.16  | 0.71 |
| -5 | 2  | -5 | 8.61  | 0.85 |
| 5  | 2  | 5  | 10.00 | 1.62 |
| 5  | -2 | -5 | 9.58  | 0.97 |
| 5  | 2  | 5  | 9.89  | 0.83 |
| -5 | 2  | -5 | 8.70  | 1.10 |
| -5 | 2  | -5 | 8.59  | 0.80 |
| -5 | 2  | -5 | 8.56  | 0.93 |
| -6 | 2  | 5  | 19.13 | 1.14 |
| 6  | -2 | 5  | 21.01 | 1.46 |
| -6 | -2 | -5 | 18.00 | 1.35 |
| -6 | -2 | -5 | 18.06 | 1.19 |
| -6 | 2  | 5  | 20.27 | 1.10 |
| -6 | -2 | -5 | 19.48 | 1.20 |
| -6 | -2 | -5 | 20.51 | 1.19 |
| -6 | 2  | -5 | 19.39 | 1.26 |
| 6  | -2 | -5 | 18.99 | 1.20 |
| 6  | -2 | -5 | 19.83 | 1.38 |

## CIF S3

|    |    |    |       |      |
|----|----|----|-------|------|
| 6  | 2  | 5  | 19.46 | 1.36 |
| 6  | -2 | -5 | 20.40 | 1.24 |
| -6 | -2 | 5  | 19.94 | 0.98 |
| -6 | 2  | -5 | 16.99 | 1.23 |
| -6 | 2  | -5 | 20.30 | 1.66 |
| -7 | -2 | -5 | 4.54  | 0.68 |
| -7 | 2  | 5  | 4.28  | 0.62 |
| -7 | -2 | -5 | 3.77  | 0.68 |
| -7 | 2  | 5  | 4.66  | 0.58 |
| -7 | -2 | -5 | 3.52  | 1.00 |
| -7 | -2 | -5 | 4.38  | 0.74 |
| 7  | -2 | 5  | 4.89  | 0.93 |
| -7 | -2 | -5 | 3.30  | 0.65 |
| 7  | 2  | 5  | 4.42  | 0.85 |
| -7 | 2  | -5 | 4.27  | 0.84 |
| -7 | 2  | -5 | 3.93  | 0.76 |
| -7 | -2 | 5  | 4.32  | 0.33 |
| -7 | -2 | 5  | 7.87  | 1.48 |
| -8 | -2 | -5 | 10.89 | 0.88 |
| -8 | -2 | -5 | 10.22 | 0.84 |
| -8 | -2 | -5 | 10.30 | 0.94 |
| -8 | -2 | -5 | 10.09 | 0.83 |
| -8 | -2 | -5 | 10.47 | 1.32 |
| -8 | 2  | 5  | 10.88 | 1.02 |
| -8 | 2  | 5  | 8.73  | 0.76 |
| -8 | -2 | -5 | 10.22 | 0.86 |
| -8 | 2  | 5  | 10.92 | 0.71 |
| -8 | -2 | -5 | 9.77  | 0.86 |
| -8 | 2  | 5  | 11.12 | 0.73 |
| -8 | 2  | -5 | 10.82 | 0.93 |
| -8 | 2  | -5 | 9.08  | 1.02 |
| -8 | 2  | -5 | 11.06 | 1.25 |
| -8 | 2  | -5 | 11.08 | 0.93 |
| -8 | 2  | -5 | 10.32 | 0.88 |
| -8 | 2  | -5 | 9.75  | 0.97 |
| -8 | 2  | -5 | 9.37  | 0.93 |
| -8 | 2  | -5 | 10.50 | 0.97 |
| -9 | -2 | -5 | 0.62  | 0.37 |
| -9 | -2 | -5 | 0.95  | 0.40 |
| -9 | -2 | -5 | 0.37  | 0.48 |
| -9 | 2  | 5  | 1.42  | 0.32 |

## CIF S3

|     |    |    |        |       |
|-----|----|----|--------|-------|
| -9  | -2 | -5 | 1.15   | 0.41  |
| -9  | 2  | 5  | 0.77   | 0.24  |
| -9  | 2  | 5  | 0.93   | 0.21  |
| -9  | -2 | -5 | 0.87   | 0.79  |
| -9  | 2  | 5  | 1.71   | 0.48  |
| -9  | 2  | -5 | 0.59   | 0.45  |
| -9  | 2  | -5 | 0.95   | 0.40  |
| -9  | 2  | -5 | 1.35   | 0.44  |
| -9  | 2  | -5 | 1.10   | 0.47  |
| -9  | 2  | -5 | 0.90   | 0.53  |
| -9  | 2  | -5 | 0.43   | 0.44  |
| -10 | -2 | -5 | 3.10   | 0.48  |
| -10 | -2 | -5 | 2.82   | 0.38  |
| -10 | 2  | 5  | 3.76   | 0.66  |
| -10 | 2  | -5 | 3.72   | 0.56  |
| -10 | 2  | -5 | 3.25   | 0.54  |
| -10 | 2  | -5 | 2.89   | 0.58  |
| -10 | 2  | -5 | 3.36   | 0.44  |
| 0   | -3 | -5 | 266.06 | 13.40 |
| 0   | 3  | 5  | 272.64 | 13.59 |
| 0   | -3 | -5 | 274.42 | 13.51 |
| 0   | -3 | -5 | 284.59 | 13.29 |
| 0   | -3 | 5  | 267.42 | 13.38 |
| 0   | 3  | 5  | 284.24 | 13.53 |
| 0   | 3  | -5 | 258.46 | 13.24 |
| 0   | 3  | -5 | 279.62 | 13.49 |
| 0   | 3  | -5 | 253.23 | 13.19 |
| 0   | 3  | -5 | 280.14 | 13.42 |
| 0   | -3 | 5  | 255.04 | 13.36 |
| 0   | 3  | -5 | 261.75 | 13.39 |
| 1   | 3  | -5 | 93.66  | 4.65  |
| 1   | -3 | 5  | 92.19  | 4.99  |
| 1   | 3  | -5 | 100.04 | 4.78  |
| 1   | -3 | 5  | 93.08  | 4.99  |
| -1  | -3 | -5 | 93.94  | 4.99  |
| 1   | 3  | -5 | 89.87  | 4.79  |
| -1  | -3 | -5 | 101.87 | 5.02  |
| 1   | 3  | -5 | 88.90  | 4.62  |
| -1  | 3  | 5  | 91.92  | 4.96  |
| -1  | 3  | 5  | 93.10  | 4.87  |
| 1   | 3  | -5 | 96.00  | 4.87  |

## CIF S3

|    |    |    |       |      |
|----|----|----|-------|------|
| -1 | 3  | 5  | 90.62 | 4.96 |
| 1  | -3 | -5 | 95.97 | 5.00 |
| 1  | 3  | 5  | 96.86 | 5.06 |
| 1  | -3 | -5 | 96.24 | 4.68 |
| 1  | -3 | -5 | 90.10 | 4.68 |
| -1 | 3  | -5 | 91.78 | 4.66 |
| -1 | 3  | -5 | 96.01 | 4.95 |
| -1 | 3  | -5 | 95.26 | 5.03 |
| -1 | 3  | -5 | 89.58 | 4.72 |
| -1 | 3  | -5 | 92.24 | 4.68 |
| 1  | -3 | -5 | 89.06 | 4.76 |
| -1 | -3 | 5  | 84.75 | 4.90 |
| 1  | 3  | 5  | 82.95 | 5.06 |
| -1 | -3 | 5  | 96.39 | 4.80 |
| -1 | 3  | -5 | 90.36 | 4.92 |
| -2 | -3 | -5 | 12.17 | 1.32 |
| 2  | 3  | -5 | 11.15 | 0.80 |
| 2  | -3 | 5  | 14.57 | 1.49 |
| -2 | 3  | 5  | 12.34 | 1.17 |
| 2  | -3 | 5  | 13.68 | 1.52 |
| 2  | 3  | -5 | 12.68 | 0.96 |
| -2 | 3  | 5  | 12.86 | 1.04 |
| 2  | 3  | -5 | 12.53 | 0.80 |
| -2 | -3 | -5 | 12.72 | 1.47 |
| 2  | 3  | -5 | 13.11 | 0.94 |
| -2 | -3 | -5 | 13.29 | 1.46 |
| -2 | 3  | 5  | 13.26 | 1.22 |
| -2 | -3 | 5  | 13.08 | 0.70 |
| -2 | 3  | -5 | 11.09 | 1.33 |
| 2  | 3  | 5  | 12.79 | 1.34 |
| -2 | -3 | 5  | 12.85 | 1.15 |
| 2  | -3 | -5 | 13.49 | 1.15 |
| 2  | 3  | 5  | 11.96 | 1.54 |
| 2  | -3 | -5 | 12.85 | 0.99 |
| 2  | -3 | -5 | 12.93 | 0.91 |
| 2  | 3  | 5  | 13.16 | 0.89 |
| -2 | 3  | -5 | 10.63 | 0.94 |
| -2 | 3  | -5 | 12.05 | 1.31 |
| -2 | -3 | 5  | 13.27 | 1.00 |
| -2 | 3  | -5 | 13.26 | 1.02 |
| 2  | -3 | -5 | 13.07 | 1.31 |

## CIF S3

|    |    |    |       |      |
|----|----|----|-------|------|
| 3  | -3 | 5  | 12.81 | 1.41 |
| -3 | -3 | -5 | 10.24 | 0.97 |
| -3 | 3  | 5  | 10.12 | 0.97 |
| 3  | 3  | -5 | 11.16 | 0.80 |
| 3  | -3 | 5  | 11.21 | 1.55 |
| 3  | -3 | 5  | 10.83 | 0.92 |
| -3 | 3  | 5  | 10.52 | 0.70 |
| -3 | 3  | 5  | 9.77  | 1.06 |
| -3 | -3 | -5 | 9.62  | 0.78 |
| -3 | -3 | -5 | 13.53 | 2.09 |
| -3 | -3 | 5  | 10.85 | 0.60 |
| -3 | -3 | 5  | 11.76 | 0.76 |
| -3 | -3 | 5  | 10.51 | 0.59 |
| 3  | 3  | 5  | 10.75 | 0.84 |
| -3 | 3  | -5 | 12.29 | 1.04 |
| 3  | 3  | 5  | 10.64 | 1.57 |
| -3 | 3  | -5 | 10.96 | 0.85 |
| -3 | 3  | -5 | 12.73 | 0.91 |
| 3  | 3  | 5  | 11.38 | 1.36 |
| 3  | -3 | -5 | 8.62  | 1.03 |
| -3 | 3  | -5 | 11.73 | 1.34 |
| -3 | -3 | 5  | 10.86 | 0.78 |
| 3  | -3 | -5 | 11.50 | 1.00 |
| 3  | -3 | -5 | 10.48 | 1.09 |
| -3 | -3 | 5  | 10.38 | 0.59 |
| -3 | 3  | -5 | 12.56 | 1.41 |
| 3  | -3 | -5 | 10.39 | 0.84 |
| 4  | -3 | 5  | -0.06 | 1.11 |
| -4 | 3  | 5  | 1.69  | 0.61 |
| -4 | 3  | 5  | 3.11  | 0.78 |
| -4 | -3 | -5 | 1.31  | 0.54 |
| -4 | 3  | 5  | 2.39  | 0.44 |
| 4  | -3 | 5  | 1.52  | 0.63 |
| -4 | -3 | -5 | 1.83  | 0.46 |
| -4 | 3  | 5  | 2.19  | 0.43 |
| 4  | 3  | 5  | 0.59  | 0.87 |
| 4  | -3 | -5 | 2.27  | 0.73 |
| 4  | 3  | 5  | 1.29  | 0.54 |
| -4 | -3 | 5  | 1.22  | 0.18 |
| 4  | -3 | -5 | 0.78  | 0.61 |
| -4 | -3 | 5  | 1.19  | 0.18 |

## CIF S3

|    |    |    |       |      |
|----|----|----|-------|------|
| 4  | -3 | -5 | 2.09  | 0.80 |
| -4 | 3  | -5 | 1.98  | 0.59 |
| -4 | 3  | -5 | 1.62  | 0.66 |
| -4 | 3  | -5 | 2.56  | 0.58 |
| 4  | -3 | -5 | 2.04  | 0.55 |
| 5  | -3 | 5  | 1.70  | 0.66 |
| -5 | -3 | -5 | 1.45  | 0.73 |
| -5 | 3  | 5  | 2.04  | 0.62 |
| -5 | 3  | 5  | 1.42  | 0.46 |
| -5 | -3 | -5 | 1.86  | 0.50 |
| -5 | 3  | 5  | 2.00  | 0.48 |
| -5 | -3 | -5 | 1.70  | 0.50 |
| 5  | -3 | -5 | 2.47  | 0.61 |
| -5 | -3 | 5  | 1.60  | 0.19 |
| -5 | 3  | -5 | 1.95  | 0.75 |
| -5 | 3  | -5 | 0.93  | 0.58 |
| 5  | 3  | 5  | 2.35  | 0.69 |
| 5  | -3 | -5 | 1.75  | 0.76 |
| 5  | -3 | -5 | 2.02  | 0.69 |
| -5 | 3  | -5 | 1.84  | 0.58 |
| 5  | 3  | 5  | 1.40  | 1.42 |
| -6 | -3 | -5 | 10.47 | 0.90 |
| 6  | -3 | 5  | 10.53 | 1.15 |
| -6 | 3  | 5  | 11.89 | 0.90 |
| -6 | 3  | 5  | 12.08 | 0.83 |
| 6  | 3  | -5 | 12.45 | 0.65 |
| -6 | 3  | 5  | 11.15 | 0.89 |
| -6 | -3 | -5 | 11.24 | 1.20 |
| -6 | -3 | -5 | 10.79 | 0.88 |
| -6 | -3 | -5 | 10.93 | 0.88 |
| -6 | 3  | -5 | 11.25 | 1.25 |
| 6  | -3 | -5 | 11.94 | 1.03 |
| -6 | -3 | 5  | 11.85 | 0.61 |
| -6 | 3  | -5 | 11.36 | 0.99 |
| 6  | -3 | -5 | 11.11 | 1.16 |
| -6 | 3  | -5 | 10.66 | 1.03 |
| -6 | 3  | -5 | 10.88 | 1.01 |
| -6 | 3  | -5 | 10.99 | 0.89 |
| 6  | -3 | -5 | 10.88 | 0.95 |
| 6  | 3  | 5  | 12.15 | 1.06 |
| -7 | 3  | 5  | 19.02 | 1.18 |



## CIF S3

|    |    |    |       |      |
|----|----|----|-------|------|
| 7  | -3 | 5  | 18.18 | 1.48 |
| -7 | -3 | -5 | 16.69 | 1.46 |
| -7 | -3 | -5 | 16.81 | 1.03 |
| -7 | -3 | -5 | 18.80 | 1.15 |
| -7 | -3 | -5 | 18.54 | 1.24 |
| -7 | -3 | -5 | 17.80 | 1.17 |
| -7 | -3 | -5 | 18.90 | 1.40 |
| -7 | 3  | -5 | 18.30 | 1.32 |
| -7 | 3  | -5 | 18.86 | 1.22 |
| -7 | -3 | 5  | 19.91 | 1.41 |
| -7 | -3 | 5  | 19.18 | 0.93 |
| 7  | 3  | 5  | 18.21 | 1.41 |
| -8 | -3 | -5 | 1.84  | 0.88 |
| -8 | -3 | -5 | 3.00  | 1.13 |
| -8 | 3  | 5  | 2.56  | 0.61 |
| -8 | -3 | -5 | 2.29  | 0.46 |
| -8 | -3 | -5 | 1.63  | 0.48 |
| -8 | 3  | 5  | 2.36  | 0.58 |
| -8 | -3 | -5 | 2.85  | 0.68 |
| -8 | -3 | -5 | 2.65  | 0.56 |
| -8 | 3  | 5  | 2.22  | 0.56 |
| -8 | -3 | -5 | 1.78  | 0.47 |
| -8 | 3  | 5  | 2.07  | 0.45 |
| -8 | 3  | -5 | 2.77  | 0.79 |
| -8 | 3  | -5 | 2.85  | 0.70 |
| -8 | 3  | -5 | 2.66  | 0.59 |
| -8 | 3  | -5 | 1.47  | 0.57 |
| -8 | 3  | -5 | 2.42  | 0.55 |
| -8 | 3  | -5 | 2.24  | 0.56 |
| -9 | -3 | -5 | 1.97  | 0.40 |
| -9 | -3 | -5 | 2.28  | 0.55 |
| -9 | -3 | -5 | 2.05  | 0.56 |
| -9 | 3  | 5  | 3.46  | 0.71 |
| -9 | 3  | 5  | 2.54  | 0.43 |
| -9 | 3  | 5  | 2.93  | 0.40 |
| -9 | 3  | -5 | 2.16  | 0.56 |
| -9 | 3  | -5 | 2.77  | 0.70 |
| -9 | 3  | -5 | 1.38  | 0.49 |
| -9 | 3  | -5 | 2.44  | 0.43 |
| -9 | 3  | -5 | 2.15  | 0.59 |
| -9 | 3  | -5 | 2.62  | 0.49 |

## CIF S3

|     |    |    |        |      |
|-----|----|----|--------|------|
| -10 | -3 | -5 | 4.30   | 0.46 |
| -10 | 3  | 5  | 3.88   | 0.58 |
| -10 | 3  | -5 | 3.55   | 0.59 |
| -10 | 3  | -5 | 3.37   | 0.45 |
| -10 | 3  | -5 | 4.28   | 0.54 |
| -10 | 3  | -5 | 3.66   | 0.48 |
| -10 | 3  | -5 | 3.65   | 0.56 |
| 0   | -4 | -5 | 114.04 | 5.86 |
| 0   | 4  | -5 | 114.45 | 5.86 |
| 0   | 4  | -5 | 111.95 | 6.07 |
| 0   | 4  | 5  | 132.26 | 6.37 |
| 0   | -4 | 5  | 119.38 | 6.07 |
| 0   | 4  | 5  | 106.00 | 6.15 |
| 0   | -4 | -5 | 131.07 | 5.98 |
| 0   | 4  | -5 | 110.49 | 5.81 |
| 0   | -4 | -5 | 112.17 | 6.10 |
| 0   | -4 | -5 | 114.44 | 6.21 |
| 0   | 4  | -5 | 115.69 | 6.12 |
| 0   | 4  | -5 | 113.29 | 6.04 |
| -1  | -4 | -5 | 25.91  | 2.09 |
| 1   | -4 | 5  | 29.42  | 2.65 |
| 1   | 4  | -5 | 27.01  | 1.81 |
| -1  | -4 | -5 | 25.59  | 1.97 |
| 1   | 4  | -5 | 25.00  | 1.54 |
| -1  | 4  | 5  | 27.51  | 2.02 |
| 1   | 4  | -5 | 26.30  | 1.77 |
| 1   | -4 | 5  | 28.93  | 2.03 |
| 1   | 4  | -5 | 25.67  | 1.50 |
| 1   | 4  | -5 | 24.40  | 1.70 |
| 1   | 4  | 5  | 25.28  | 1.51 |
| -1  | 4  | -5 | 27.26  | 1.98 |
| 1   | -4 | -5 | 26.29  | 1.65 |
| 1   | 4  | 5  | 28.60  | 2.19 |
| 1   | -4 | -5 | 27.23  | 1.80 |
| -1  | 4  | -5 | 26.76  | 1.63 |
| -1  | 4  | -5 | 22.44  | 1.53 |
| -1  | -4 | 5  | 26.42  | 2.00 |
| -1  | -4 | 5  | 27.43  | 1.79 |
| -1  | 4  | -5 | 28.29  | 1.94 |
| 1   | -4 | -5 | 25.82  | 2.01 |
| -1  | 4  | -5 | 25.94  | 1.57 |

## CIF S3

|    |    |    |       |      |
|----|----|----|-------|------|
| -1 | 4  | -5 | 28.12 | 1.90 |
| 1  | 4  | 5  | 28.26 | 2.05 |
| -2 | -4 | -5 | 3.90  | 1.32 |
| 2  | 4  | -5 | 4.69  | 0.55 |
| -2 | -4 | -5 | 5.66  | 0.82 |
| -2 | -4 | -5 | 4.29  | 1.10 |
| -2 | 4  | 5  | 4.08  | 1.08 |
| 2  | 4  | -5 | 3.97  | 0.78 |
| 2  | -4 | 5  | 3.84  | 0.67 |
| 2  | 4  | -5 | 2.25  | 0.72 |
| 2  | -4 | 5  | 4.69  | 1.28 |
| -2 | -4 | -5 | 3.29  | 0.59 |
| 2  | 4  | -5 | 3.82  | 0.52 |
| 2  | -4 | 5  | 3.46  | 1.22 |
| -2 | -4 | 5  | 4.30  | 0.83 |
| -2 | 4  | -5 | 3.34  | 1.07 |
| 2  | -4 | -5 | 4.26  | 0.93 |
| 2  | 4  | 5  | 3.26  | 0.60 |
| -2 | 4  | -5 | 2.69  | 0.93 |
| 2  | 4  | 5  | 3.07  | 1.26 |
| 2  | -4 | -5 | 3.05  | 0.88 |
| 2  | -4 | -5 | 3.97  | 0.94 |
| -2 | 4  | -5 | 3.46  | 0.75 |
| -2 | -4 | 5  | 3.40  | 0.40 |
| 2  | 4  | 5  | 4.29  | 1.01 |
| 2  | -4 | -5 | 4.43  | 1.14 |
| -2 | 4  | -5 | 3.93  | 0.69 |
| -2 | -4 | 5  | 2.73  | 0.41 |
| 3  | 4  | -5 | 17.83 | 1.00 |
| 3  | -4 | 5  | 17.28 | 1.19 |
| -3 | 4  | 5  | 16.79 | 1.26 |
| 3  | -4 | 5  | 16.22 | 1.14 |
| -3 | -4 | -5 | 17.85 | 1.20 |
| -3 | -4 | -5 | 16.13 | 1.03 |
| 3  | 4  | -5 | 18.70 | 1.05 |
| 3  | -4 | 5  | 15.90 | 1.79 |
| -3 | 4  | 5  | 15.88 | 1.02 |
| -3 | -4 | -5 | 17.35 | 1.89 |
| 3  | -4 | 5  | 19.88 | 1.86 |
| -3 | 4  | 5  | 14.41 | 1.29 |
| -3 | 4  | 5  | 17.22 | 1.41 |

## CIF S3

|    |    |    |       |      |
|----|----|----|-------|------|
| 3  | 4  | -5 | 18.34 | 1.22 |
| 3  | 4  | 5  | 17.76 | 1.90 |
| -3 | -4 | 5  | 16.71 | 0.98 |
| -3 | 4  | -5 | 16.83 | 1.70 |
| -3 | -4 | 5  | 17.64 | 0.96 |
| -3 | -4 | 5  | 16.18 | 1.15 |
| 3  | -4 | -5 | 14.44 | 1.37 |
| -3 | -4 | 5  | 16.88 | 0.90 |
| 3  | 4  | 5  | 14.42 | 1.56 |
| -3 | 4  | -5 | 15.90 | 1.10 |
| 3  | -4 | -5 | 16.03 | 1.32 |
| 3  | 4  | 5  | 16.19 | 1.12 |
| -3 | -4 | 5  | 18.26 | 0.88 |
| -3 | 4  | -5 | 17.61 | 1.28 |
| -3 | -4 | 5  | 16.43 | 0.87 |
| 3  | -4 | -5 | 16.48 | 1.14 |
| 3  | -4 | -5 | 16.22 | 1.61 |
| -3 | 4  | -5 | 17.46 | 1.17 |
| -4 | 4  | 5  | 20.93 | 1.35 |
| 4  | -4 | 5  | 18.06 | 2.16 |
| -4 | 4  | 5  | 24.54 | 1.57 |
| 4  | -4 | 5  | 24.47 | 1.52 |
| -4 | -4 | -5 | 28.35 | 1.49 |
| -4 | -4 | -5 | 22.15 | 1.36 |
| -4 | 4  | 5  | 22.07 | 1.70 |
| -4 | -4 | -5 | 24.29 | 1.33 |
| -4 | 4  | 5  | 22.58 | 1.31 |
| 4  | -4 | -5 | 24.11 | 1.56 |
| 4  | -4 | -5 | 24.96 | 1.47 |
| -4 | 4  | -5 | 24.10 | 1.62 |
| -4 | 4  | -5 | 23.72 | 1.45 |
| 4  | 4  | 5  | 17.88 | 2.15 |
| 4  | 4  | 5  | 25.59 | 1.48 |
| -4 | -4 | 5  | 23.89 | 1.20 |
| -4 | -4 | 5  | 22.83 | 1.22 |
| -4 | 4  | -5 | 25.46 | 1.42 |
| 4  | -4 | -5 | 22.69 | 1.66 |
| 5  | 4  | -5 | 11.65 | 0.65 |
| 5  | -4 | 5  | 10.00 | 1.03 |
| -5 | 4  | 5  | 11.96 | 1.12 |
| -5 | -4 | -5 | 10.89 | 0.94 |

## CIF S3

|    |    |    |       |      |
|----|----|----|-------|------|
| -5 | -4 | -5 | 10.67 | 1.19 |
| -5 | 4  | 5  | 9.93  | 0.86 |
| -5 | -4 | -5 | 10.46 | 0.82 |
| -5 | -4 | -5 | 9.94  | 1.13 |
| -5 | 4  | 5  | 11.75 | 0.82 |
| -5 | 4  | -5 | 10.66 | 1.07 |
| -5 | 4  | -5 | 10.97 | 1.18 |
| 5  | -4 | -5 | 11.71 | 0.99 |
| 5  | -4 | -5 | 11.03 | 1.16 |
| 5  | -4 | -5 | 11.29 | 1.08 |
| 5  | 4  | 5  | 12.19 | 1.01 |
| -5 | 4  | -5 | 10.67 | 0.98 |
| -6 | -4 | -5 | 32.54 | 2.00 |
| 6  | -4 | 5  | 31.24 | 2.05 |
| 6  | 4  | -5 | 34.84 | 1.67 |
| -6 | 4  | 5  | 34.88 | 1.78 |
| -6 | -4 | -5 | 32.55 | 1.78 |
| -6 | -4 | -5 | 31.10 | 2.04 |
| -6 | -4 | -5 | 34.75 | 1.85 |
| -6 | 4  | 5  | 34.10 | 1.95 |
| -6 | -4 | -5 | 31.71 | 1.77 |
| -6 | 4  | 5  | 30.87 | 1.80 |
| -6 | 4  | -5 | 33.35 | 1.91 |
| -6 | 4  | -5 | 30.36 | 1.80 |
| -6 | -4 | 5  | 30.05 | 1.87 |
| 6  | 4  | 5  | 34.07 | 2.01 |
| -6 | 4  | -5 | 37.82 | 2.81 |
| -6 | -4 | 5  | 33.54 | 1.63 |
| 6  | -4 | -5 | 31.97 | 1.99 |
| 6  | -4 | -5 | 30.60 | 1.94 |
| 6  | -4 | -5 | 27.46 | 2.10 |
| -6 | 4  | -5 | 31.71 | 1.93 |
| -7 | -4 | -5 | 27.28 | 1.44 |
| -7 | -4 | -5 | 24.46 | 1.81 |
| -7 | -4 | -5 | 24.89 | 1.66 |
| 7  | -4 | 5  | 20.42 | 1.80 |
| -7 | 4  | 5  | 26.98 | 1.51 |
| -7 | 4  | 5  | 24.59 | 1.45 |
| -7 | -4 | -5 | 25.71 | 1.53 |
| -7 | -4 | -5 | 22.92 | 1.48 |
| -7 | 4  | -5 | 24.14 | 1.60 |

## CIF S3

|     |    |    |       |      |
|-----|----|----|-------|------|
| -7  | 4  | -5 | 27.19 | 1.54 |
| 7   | -4 | -5 | 22.76 | 1.90 |
| 7   | 4  | 5  | 24.89 | 2.10 |
| -7  | -4 | 5  | 26.35 | 1.26 |
| -7  | -4 | 5  | 23.51 | 1.69 |
| -8  | -4 | -5 | 4.93  | 0.75 |
| -8  | 4  | 5  | 5.79  | 0.87 |
| -8  | -4 | -5 | 5.74  | 0.75 |
| -8  | 4  | 5  | 6.70  | 0.62 |
| -8  | -4 | -5 | 4.40  | 1.10 |
| -8  | 4  | 5  | 7.43  | 0.69 |
| -8  | -4 | -5 | 5.57  | 0.76 |
| -8  | -4 | -5 | 5.99  | 0.72 |
| -8  | 4  | 5  | 6.26  | 0.67 |
| -8  | 4  | 5  | 6.15  | 0.77 |
| -8  | 4  | -5 | 5.00  | 0.77 |
| -8  | 4  | -5 | 5.69  | 1.32 |
| -8  | 4  | -5 | 6.05  | 0.90 |
| -8  | 4  | -5 | 5.61  | 0.89 |
| -8  | 4  | -5 | 6.15  | 0.86 |
| -8  | 4  | -5 | 7.33  | 0.95 |
| -8  | 4  | -5 | 5.59  | 0.95 |
| -9  | -4 | -5 | 0.47  | 0.34 |
| -9  | -4 | -5 | 1.18  | 0.37 |
| -9  | 4  | 5  | 1.14  | 0.30 |
| -9  | 4  | 5  | 1.59  | 0.60 |
| -9  | 4  | 5  | 0.99  | 0.47 |
| -9  | -4 | -5 | 0.59  | 0.34 |
| -9  | 4  | -5 | 0.96  | 0.41 |
| -9  | 4  | -5 | 1.08  | 0.42 |
| -9  | 4  | -5 | 0.67  | 0.45 |
| -9  | 4  | -5 | 1.14  | 0.45 |
| -9  | 4  | -5 | 1.48  | 0.49 |
| -10 | 4  | 5  | 0.09  | 0.35 |
| -10 | 4  | -5 | 0.56  | 0.29 |
| -10 | 4  | -5 | 0.44  | 0.26 |
| -10 | 4  | -5 | 0.47  | 0.32 |
| -10 | 4  | -5 | -0.42 | 0.32 |
| 0   | 5  | -5 | 17.27 | 1.25 |
| 0   | 5  | -5 | 17.62 | 1.56 |
| 0   | 5  | -5 | 17.50 | 1.20 |

## CIF S3

|    |    |    |       |      |
|----|----|----|-------|------|
| 0  | -5 | -5 | 19.05 | 1.77 |
| 0  | -5 | -5 | 17.57 | 1.74 |
| 0  | -5 | 5  | 17.48 | 1.74 |
| 0  | 5  | -5 | 20.12 | 1.67 |
| 0  | 5  | 5  | 20.36 | 1.92 |
| 0  | 5  | 5  | 16.94 | 1.68 |
| 0  | -5 | 5  | 15.70 | 1.13 |
| 0  | 5  | 5  | 19.40 | 1.08 |
| 0  | -5 | -5 | 15.31 | 1.34 |
| 0  | 5  | -5 | 18.32 | 1.51 |
| -1 | -5 | -5 | 60.18 | 3.17 |
| 1  | 5  | -5 | 60.40 | 3.44 |
| -1 | -5 | -5 | 61.19 | 3.63 |
| 1  | -5 | 5  | 55.99 | 3.02 |
| -1 | -5 | -5 | 61.00 | 3.59 |
| 1  | 5  | -5 | 63.94 | 3.09 |
| 1  | -5 | 5  | 61.58 | 3.56 |
| -1 | 5  | 5  | 66.94 | 3.74 |
| 1  | 5  | -5 | 59.39 | 3.38 |
| 1  | 5  | -5 | 61.63 | 3.14 |
| 1  | 5  | -5 | 62.10 | 3.38 |
| -1 | 5  | 5  | 58.04 | 3.01 |
| -1 | 5  | -5 | 62.92 | 3.95 |
| 1  | -5 | -5 | 56.93 | 3.19 |
| -1 | -5 | 5  | 58.72 | 3.37 |
| -1 | 5  | -5 | 52.21 | 3.52 |
| 1  | -5 | -5 | 57.64 | 3.60 |
| -1 | 5  | -5 | 59.28 | 3.47 |
| 1  | 5  | 5  | 55.82 | 3.01 |
| 1  | 5  | 5  | 57.14 | 3.08 |
| -1 | 5  | -5 | 61.60 | 3.16 |
| 1  | -5 | -5 | 62.09 | 3.33 |
| 1  | 5  | 5  | 48.79 | 3.62 |
| 1  | 5  | 5  | 51.19 | 3.49 |
| -1 | 5  | -5 | 58.21 | 3.21 |
| -1 | 5  | -5 | 62.93 | 3.14 |
| -1 | -5 | 5  | 61.16 | 3.54 |
| 2  | 5  | -5 | 31.92 | 1.70 |
| -2 | -5 | -5 | 31.70 | 2.49 |
| 2  | -5 | 5  | 30.05 | 2.37 |
| -2 | 5  | 5  | 31.02 | 1.64 |

## CIF S3

|    |    |    |       |      |
|----|----|----|-------|------|
| 2  | 5  | -5 | 31.09 | 1.99 |
| 2  | -5 | 5  | 29.27 | 2.40 |
| -2 | -5 | -5 | 31.89 | 1.64 |
| -2 | -5 | -5 | 29.13 | 2.20 |
| 2  | -5 | 5  | 29.15 | 1.70 |
| 2  | 5  | -5 | 31.03 | 1.93 |
| 2  | 5  | -5 | 33.78 | 1.73 |
| -2 | -5 | -5 | 34.00 | 1.86 |
| -2 | 5  | -5 | 31.42 | 1.82 |
| -2 | -5 | 5  | 27.95 | 1.56 |
| -2 | -5 | 5  | 29.35 | 1.71 |
| 2  | -5 | -5 | 26.95 | 2.24 |
| -2 | 5  | -5 | 29.37 | 2.22 |
| 2  | 5  | 5  | 31.34 | 1.74 |
| -2 | 5  | -5 | 28.45 | 1.75 |
| 2  | 5  | 5  | 22.85 | 2.34 |
| 2  | -5 | -5 | 28.31 | 2.02 |
| -2 | -5 | 5  | 31.53 | 2.32 |
| 2  | 5  | 5  | 22.67 | 2.15 |
| -2 | 5  | -5 | 28.33 | 1.70 |
| -2 | -5 | 5  | 31.61 | 1.56 |
| -2 | 5  | -5 | 33.56 | 2.37 |
| -2 | 5  | -5 | 29.26 | 1.77 |
| -2 | -5 | 5  | 30.22 | 1.93 |
| 2  | -5 | -5 | 31.67 | 1.94 |
| -3 | 5  | 5  | 3.64  | 0.61 |
| 3  | -5 | 5  | 4.03  | 0.74 |
| 3  | -5 | 5  | 4.67  | 1.48 |
| -3 | 5  | 5  | 3.10  | 0.63 |
| -3 | -5 | -5 | 2.46  | 1.20 |
| -3 | -5 | -5 | 4.77  | 0.91 |
| -3 | -5 | -5 | 3.61  | 0.66 |
| 3  | 5  | -5 | 3.48  | 0.59 |
| 3  | 5  | -5 | 3.78  | 0.58 |
| -3 | -5 | 5  | 3.34  | 0.54 |
| 3  | -5 | -5 | 4.68  | 1.00 |
| -3 | 5  | -5 | 4.50  | 0.77 |
| 3  | 5  | 5  | 3.61  | 0.67 |
| -3 | -5 | 5  | 4.45  | 0.55 |
| 3  | -5 | -5 | 2.35  | 1.21 |
| -3 | -5 | 5  | 4.07  | 0.37 |



## CIF S3

|    |    |    |       |      |
|----|----|----|-------|------|
| -3 | -5 | 5  | 4.01  | 0.39 |
| 3  | -5 | -5 | 4.48  | 0.94 |
| -3 | 5  | -5 | 3.35  | 1.24 |
| -3 | 5  | -5 | 4.50  | 0.67 |
| 3  | 5  | 5  | 4.62  | 1.40 |
| -3 | -5 | 5  | 4.38  | 0.45 |
| -3 | 5  | -5 | 3.76  | 0.97 |
| -4 | -5 | -5 | 2.25  | 0.55 |
| -4 | -5 | -5 | 2.10  | 0.69 |
| -4 | 5  | 5  | 2.89  | 0.83 |
| -4 | -5 | -5 | 2.95  | 0.73 |
| -4 | -5 | -5 | 2.66  | 0.65 |
| 4  | -5 | 5  | 2.31  | 0.72 |
| 4  | -5 | 5  | 1.65  | 0.71 |
| 4  | 5  | -5 | 2.50  | 0.55 |
| -4 | 5  | 5  | 2.90  | 0.56 |
| -4 | 5  | -5 | 2.97  | 0.85 |
| 4  | 5  | 5  | 1.94  | 0.64 |
| 4  | -5 | -5 | 2.82  | 1.05 |
| 4  | 5  | 5  | 0.21  | 0.97 |
| -4 | -5 | 5  | 1.99  | 0.36 |
| -4 | -5 | 5  | 1.88  | 0.45 |
| -4 | 5  | -5 | 2.36  | 0.75 |
| -4 | 5  | -5 | 2.43  | 0.61 |
| 4  | -5 | -5 | 2.17  | 0.93 |
| -5 | 5  | 5  | 8.41  | 0.85 |
| -5 | -5 | -5 | 8.43  | 0.85 |
| -5 | -5 | -5 | 8.09  | 1.11 |
| -5 | -5 | -5 | 9.42  | 0.95 |
| -5 | -5 | -5 | 10.64 | 0.84 |
| -5 | 5  | 5  | 9.44  | 0.90 |
| -5 | -5 | -5 | 8.97  | 1.18 |
| 5  | -5 | 5  | 8.31  | 1.01 |
| -5 | 5  | 5  | 11.06 | 1.19 |
| 5  | -5 | -5 | 7.37  | 1.08 |
| -5 | 5  | -5 | 9.33  | 1.28 |
| 5  | -5 | -5 | 9.19  | 1.19 |
| 5  | 5  | 5  | 8.19  | 0.98 |
| -5 | 5  | -5 | 9.53  | 0.93 |
| -5 | 5  | -5 | 10.53 | 0.99 |
| -5 | -5 | 5  | 9.24  | 0.95 |

## CIF S3

|    |    |    |       |      |
|----|----|----|-------|------|
| -5 | 5  | -5 | 10.06 | 1.05 |
| -6 | -5 | -5 | 16.29 | 1.08 |
| 6  | -5 | 5  | 12.54 | 1.35 |
| -6 | -5 | -5 | 14.63 | 1.45 |
| -6 | -5 | -5 | 15.75 | 1.16 |
| -6 | -5 | -5 | 15.70 | 1.38 |
| -6 | -5 | -5 | 12.51 | 1.10 |
| -6 | 5  | 5  | 19.34 | 1.16 |
| -6 | 5  | 5  | 19.52 | 1.41 |
| -6 | -5 | -5 | 16.29 | 1.11 |
| -6 | 5  | 5  | 15.65 | 1.05 |
| -6 | 5  | -5 | 15.71 | 1.23 |
| 6  | 5  | 5  | 14.66 | 1.29 |
| 6  | -5 | -5 | 14.39 | 1.38 |
| -6 | 5  | -5 | 15.85 | 1.24 |
| 6  | -5 | -5 | 12.57 | 1.50 |
| -6 | -5 | 5  | 18.53 | 1.34 |
| -6 | 5  | -5 | 15.35 | 1.28 |
| -7 | -5 | -5 | 17.28 | 1.14 |
| -7 | 5  | 5  | 18.77 | 1.35 |
| -7 | -5 | -5 | 17.49 | 1.13 |
| -7 | 5  | 5  | 16.97 | 1.15 |
| -7 | -5 | -5 | 17.97 | 1.23 |
| -7 | 5  | 5  | 14.41 | 1.25 |
| -7 | -5 | -5 | 15.68 | 1.12 |
| -7 | -5 | -5 | 15.40 | 1.66 |
| -7 | -5 | -5 | 18.44 | 1.19 |
| -7 | -5 | -5 | 16.15 | 1.05 |
| -7 | 5  | 5  | 17.87 | 1.23 |
| -7 | 5  | 5  | 15.71 | 1.10 |
| -7 | 5  | 5  | 17.23 | 1.15 |
| -7 | -5 | -5 | 16.79 | 1.49 |
| -7 | -5 | -5 | 17.78 | 1.45 |
| -7 | -5 | -5 | 17.63 | 1.15 |
| -7 | -5 | 5  | 17.69 | 1.31 |
| -7 | -5 | 5  | 18.30 | 0.89 |
| -7 | 5  | -5 | 14.31 | 1.30 |
| -7 | -5 | 5  | 15.07 | 0.82 |
| -7 | 5  | -5 | 21.45 | 1.80 |
| -7 | 5  | -5 | 17.47 | 1.32 |
| -7 | 5  | -5 | 18.65 | 1.23 |

## CIF S3

|     |    |    |       |      |
|-----|----|----|-------|------|
| -7  | -5 | 5  | 15.42 | 0.82 |
| -7  | 5  | -5 | 14.55 | 1.30 |
| -8  | -5 | -5 | 2.31  | 0.48 |
| -8  | -5 | -5 | 0.80  | 0.52 |
| -8  | -5 | -5 | 1.98  | 0.45 |
| -8  | 5  | 5  | 2.41  | 0.60 |
| -8  | 5  | 5  | 1.64  | 0.37 |
| -8  | -5 | -5 | 2.68  | 0.97 |
| -8  | 5  | 5  | 2.43  | 0.63 |
| -8  | 5  | 5  | 1.05  | 0.49 |
| -8  | 5  | 5  | 2.31  | 0.58 |
| -8  | 5  | 5  | 2.00  | 0.43 |
| -8  | 5  | -5 | 2.51  | 0.62 |
| -8  | 5  | -5 | 2.30  | 0.55 |
| -8  | 5  | -5 | 1.80  | 0.62 |
| -8  | 5  | -5 | 1.44  | 0.55 |
| -8  | 5  | -5 | 1.70  | 0.53 |
| -8  | 5  | -5 | 1.13  | 0.92 |
| -8  | -5 | 5  | 1.82  | 0.81 |
| -8  | 5  | -5 | 0.89  | 0.72 |
| -9  | -5 | -5 | 3.15  | 0.54 |
| -9  | -5 | -5 | 3.20  | 0.57 |
| -9  | -5 | -5 | 2.83  | 0.46 |
| -9  | 5  | 5  | 2.98  | 0.74 |
| -9  | 5  | 5  | 1.99  | 0.48 |
| -9  | 5  | -5 | 3.57  | 0.73 |
| -9  | 5  | -5 | 2.90  | 0.50 |
| -9  | 5  | -5 | 2.92  | 0.59 |
| -9  | 5  | -5 | 3.15  | 0.71 |
| -9  | 5  | -5 | 2.65  | 0.66 |
| -10 | 5  | 5  | 0.93  | 0.14 |
| -10 | 5  | 5  | 0.67  | 0.32 |
| 10  | -5 | 5  | 2.00  | 0.57 |
| -10 | 5  | 5  | 1.29  | 0.17 |
| -10 | 5  | -5 | 2.15  | 0.42 |
| -10 | 5  | -5 | 0.79  | 0.29 |
| -10 | 5  | -5 | 1.31  | 0.25 |
| -10 | 5  | -5 | 1.13  | 0.34 |
| 0   | 6  | -5 | 67.31 | 3.54 |
| 0   | 6  | 5  | 69.14 | 3.33 |
| 0   | -6 | -5 | 57.28 | 3.87 |

## CIF S3

|    |    |    |       |      |
|----|----|----|-------|------|
| 0  | -6 | 5  | 70.15 | 4.07 |
| 0  | 6  | -5 | 65.71 | 3.47 |
| 0  | 6  | 5  | 69.29 | 4.17 |
| 0  | 6  | -5 | 61.91 | 3.83 |
| 0  | -6 | -5 | 58.69 | 3.95 |
| 0  | -6 | 5  | 64.07 | 3.34 |
| 0  | -6 | -5 | 70.28 | 3.49 |
| 0  | 6  | -5 | 65.37 | 3.95 |
| -1 | -6 | -5 | 31.73 | 2.47 |
| 1  | 6  | -5 | 31.63 | 2.26 |
| 1  | -6 | 5  | 29.44 | 1.69 |
| 1  | 6  | -5 | 30.96 | 1.82 |
| -1 | 6  | 5  | 31.26 | 1.68 |
| -1 | -6 | -5 | 31.11 | 1.86 |
| 1  | -6 | 5  | 30.75 | 2.24 |
| -1 | 6  | 5  | 33.00 | 2.49 |
| -1 | -6 | -5 | 27.70 | 2.31 |
| 1  | 6  | -5 | 32.74 | 1.76 |
| 1  | -6 | 5  | 31.55 | 2.46 |
| 1  | -6 | -5 | 24.43 | 2.27 |
| -1 | 6  | -5 | 32.45 | 2.39 |
| -1 | 6  | -5 | 34.06 | 1.85 |
| 1  | -6 | -5 | 22.50 | 2.21 |
| 1  | -6 | -5 | 28.10 | 1.92 |
| 1  | 6  | 5  | 33.06 | 1.66 |
| -1 | -6 | 5  | 30.78 | 2.38 |
| -1 | 6  | -5 | 30.55 | 1.95 |
| 1  | 6  | 5  | 23.28 | 2.41 |
| -1 | -6 | 5  | 30.33 | 1.64 |
| -1 | 6  | -5 | 30.48 | 1.86 |
| 1  | 6  | 5  | 27.07 | 1.77 |
| 1  | 6  | 5  | 29.01 | 2.63 |
| -2 | 6  | 5  | 44.55 | 2.34 |
| 2  | -6 | 5  | 44.43 | 2.37 |
| -2 | -6 | -5 | 43.18 | 2.45 |
| 2  | 6  | -5 | 46.32 | 2.40 |
| 2  | -6 | 5  | 44.64 | 3.02 |
| 2  | 6  | -5 | 48.09 | 2.45 |
| -2 | -6 | -5 | 42.08 | 3.03 |
| -2 | -6 | 5  | 40.52 | 2.96 |
| -2 | 6  | -5 | 48.27 | 2.56 |

## CIF S3

|    |    |    |       |      |
|----|----|----|-------|------|
| -2 | -6 | 5  | 38.03 | 2.63 |
| -2 | -6 | 5  | 41.74 | 2.25 |
| 2  | 6  | 5  | 45.97 | 2.42 |
| -2 | 6  | -5 | 47.29 | 3.09 |
| -2 | -6 | 5  | 45.29 | 2.39 |
| -2 | -6 | 5  | 44.75 | 2.24 |
| 2  | -6 | -5 | 35.64 | 2.92 |
| -2 | 6  | -5 | 44.75 | 2.42 |
| 2  | -6 | -5 | 44.13 | 2.70 |
| 2  | -6 | -5 | 45.05 | 2.55 |
| -2 | -6 | 5  | 41.48 | 2.29 |
| -2 | 6  | -5 | 44.00 | 2.37 |
| -3 | -6 | -5 | 1.53  | 1.70 |
| 3  | 6  | -5 | 5.68  | 0.74 |
| 3  | -6 | 5  | 3.78  | 1.46 |
| -3 | -6 | -5 | 5.07  | 0.96 |
| 3  | -6 | 5  | 5.78  | 0.84 |
| -3 | 6  | 5  | 4.86  | 0.63 |
| -3 | -6 | -5 | 6.24  | 0.66 |
| -3 | 6  | 5  | 4.43  | 0.81 |
| 3  | 6  | -5 | 6.04  | 0.71 |
| -3 | -6 | -5 | 4.22  | 0.78 |
| -3 | -6 | 5  | 6.16  | 0.68 |
| -3 | 6  | -5 | 4.89  | 0.76 |
| -3 | -6 | 5  | 5.29  | 0.46 |
| 3  | -6 | -5 | 4.84  | 1.12 |
| 3  | 6  | 5  | 4.97  | 0.77 |
| -3 | 6  | -5 | 4.74  | 0.94 |
| -3 | 6  | -5 | 4.49  | 0.93 |
| 3  | -6 | -5 | 5.38  | 1.25 |
| 3  | 6  | 5  | 3.27  | 1.41 |
| 3  | -6 | -5 | 2.96  | 1.38 |
| -3 | 6  | -5 | 5.09  | 1.31 |
| -3 | -6 | 5  | 4.71  | 0.53 |
| -3 | -6 | 5  | 5.59  | 0.59 |
| 4  | -6 | 5  | 9.93  | 1.05 |
| 4  | 6  | -5 | 9.97  | 0.91 |
| -4 | -6 | -5 | 10.59 | 1.18 |
| -4 | -6 | -5 | 11.91 | 0.84 |
| -4 | -6 | -5 | 9.80  | 1.09 |
| -4 | 6  | 5  | 11.45 | 0.92 |

## CIF S3

|    |    |    |       |      |
|----|----|----|-------|------|
| -4 | -6 | -5 | 10.82 | 0.92 |
| -4 | -6 | 5  | 10.30 | 1.01 |
| -4 | -6 | 5  | 10.97 | 0.78 |
| 4  | -6 | -5 | 8.66  | 1.24 |
| -4 | -6 | 5  | 11.00 | 0.66 |
| -4 | 6  | -5 | 10.53 | 1.00 |
| 4  | -6 | -5 | 5.88  | 1.15 |
| 4  | 6  | 5  | 11.13 | 1.05 |
| -4 | 6  | -5 | 10.78 | 1.21 |
| -4 | 6  | -5 | 11.67 | 1.14 |
| -5 | -6 | -5 | 25.66 | 1.47 |
| -5 | 6  | 5  | 23.59 | 1.50 |
| -5 | -6 | -5 | 22.59 | 1.88 |
| -5 | -6 | -5 | 23.81 | 1.65 |
| -5 | -6 | -5 | 27.17 | 1.53 |
| -5 | 6  | 5  | 24.26 | 1.56 |
| -5 | -6 | -5 | 26.75 | 1.49 |
| -5 | 6  | -5 | 23.71 | 1.54 |
| 5  | -6 | -5 | 23.52 | 1.95 |
| -5 | -6 | 5  | 22.76 | 1.55 |
| -5 | -6 | 5  | 24.89 | 1.35 |
| -5 | 6  | -5 | 25.93 | 1.59 |
| 5  | -6 | -5 | 22.90 | 1.79 |
| 5  | 6  | 5  | 25.23 | 1.67 |
| -5 | 6  | -5 | 24.97 | 1.83 |
| -5 | 6  | -5 | 24.88 | 1.69 |
| -5 | -6 | 5  | 26.27 | 1.67 |
| -6 | -6 | -5 | 6.25  | 0.90 |
| -6 | -6 | -5 | 6.80  | 0.76 |
| -6 | -6 | -5 | 7.39  | 0.77 |
| -6 | -6 | -5 | 8.41  | 0.95 |
| -6 | -6 | -5 | 6.63  | 1.20 |
| -6 | 6  | 5  | 9.08  | 1.18 |
| 6  | -6 | 5  | 6.67  | 1.14 |
| -6 | -6 | -5 | 7.50  | 1.47 |
| -6 | 6  | 5  | 7.50  | 0.82 |
| -6 | 6  | 5  | 6.45  | 0.99 |
| -6 | -6 | 5  | 8.63  | 1.65 |
| 6  | -6 | -5 | 7.08  | 1.20 |
| 6  | 6  | 5  | 7.18  | 1.03 |
| -6 | 6  | -5 | 6.21  | 1.01 |

## CIF S3

|    |    |    |      |      |
|----|----|----|------|------|
| -6 | 6  | -5 | 7.81 | 1.04 |
| -6 | 6  | -5 | 6.65 | 0.98 |
| -6 | -6 | 5  | 9.19 | 1.16 |
| -7 | 6  | 5  | 1.52 | 0.62 |
| -7 | 6  | 5  | 1.09 | 0.68 |
| -7 | -6 | -5 | 0.38 | 1.08 |
| -7 | -6 | -5 | 0.76 | 0.47 |
| -7 | -6 | -5 | 0.50 | 0.56 |
| -7 | -6 | -5 | 0.16 | 0.52 |
| -7 | -6 | -5 | 1.38 | 0.86 |
| -7 | -6 | -5 | 1.11 | 0.59 |
| -7 | 6  | 5  | 1.34 | 0.59 |
| -7 | 6  | 5  | 1.52 | 0.68 |
| -7 | -6 | -5 | 0.32 | 0.53 |
| -7 | -6 | -5 | 1.79 | 1.07 |
| -7 | 6  | 5  | 0.79 | 0.52 |
| -7 | 6  | 5  | 0.53 | 0.54 |
| -7 | 6  | -5 | 0.57 | 0.60 |
| -7 | -6 | 5  | 0.78 | 0.27 |
| -7 | -6 | 5  | 0.67 | 0.76 |
| -7 | -6 | 5  | 0.94 | 0.20 |
| -7 | 6  | -5 | 0.84 | 0.64 |
| -7 | -6 | 5  | 0.92 | 0.20 |
| -7 | 6  | -5 | 2.02 | 1.06 |
| -7 | 6  | -5 | 0.71 | 0.61 |
| -8 | 6  | 5  | 4.26 | 0.81 |
| -8 | 6  | 5  | 3.70 | 0.68 |
| -8 | -6 | -5 | 2.53 | 0.70 |
| -8 | 6  | 5  | 4.08 | 0.65 |
| -8 | -6 | -5 | 5.70 | 1.10 |
| -8 | 6  | 5  | 3.33 | 0.61 |
| -8 | -6 | -5 | 2.77 | 0.70 |
| -8 | -6 | -5 | 4.23 | 0.70 |
| -8 | 6  | -5 | 4.49 | 0.83 |
| -8 | 6  | -5 | 4.23 | 0.77 |
| -8 | 6  | -5 | 3.90 | 0.95 |
| -8 | 6  | -5 | 3.87 | 0.82 |
| -8 | 6  | -5 | 4.06 | 0.80 |
| -8 | 6  | -5 | 4.00 | 0.97 |
| -8 | -6 | 5  | 4.50 | 1.01 |
| -9 | 6  | 5  | 0.23 | 0.40 |

## CIF S3

|    |    |    |       |      |
|----|----|----|-------|------|
| -9 | 6  | 5  | -0.03 | 0.30 |
| -9 | -6 | -5 | -0.03 | 0.30 |
| -9 | 6  | 5  | 0.10  | 0.29 |
| 9  | -6 | 5  | -0.24 | 0.51 |
| -9 | 6  | -5 | -0.21 | 0.41 |
| -9 | 6  | -5 | -0.43 | 0.40 |
| -9 | 6  | -5 | 0.37  | 0.43 |
| -9 | 6  | -5 | -0.38 | 0.42 |
| 0  | -7 | -5 | 6.47  | 1.53 |
| 0  | 7  | 5  | 10.30 | 1.73 |
| 0  | 7  | 5  | 10.68 | 0.85 |
| 0  | 7  | -5 | 10.77 | 1.59 |
| 0  | -7 | 5  | 8.31  | 1.77 |
| 0  | -7 | 5  | 9.35  | 0.99 |
| 0  | -7 | 5  | 10.71 | 0.91 |
| 0  | 7  | -5 | 9.68  | 1.12 |
| 0  | 7  | -5 | 9.53  | 1.08 |
| 1  | 7  | -5 | 4.19  | 0.83 |
| 1  | -7 | 5  | 0.12  | 1.07 |
| -1 | -7 | -5 | 4.93  | 1.37 |
| 1  | 7  | -5 | 4.09  | 0.87 |
| 1  | -7 | 5  | 3.71  | 0.73 |
| -1 | -7 | -5 | 1.34  | 1.00 |
| -1 | 7  | 5  | 3.92  | 1.41 |
| -1 | 7  | 5  | 2.90  | 0.75 |
| 1  | 7  | -5 | 4.57  | 1.36 |
| 1  | -7 | 5  | 3.98  | 0.74 |
| 1  | -7 | -5 | 3.15  | 1.34 |
| -1 | 7  | -5 | 2.96  | 0.80 |
| -1 | 7  | -5 | 3.24  | 1.34 |
| -1 | -7 | 5  | 2.70  | 0.68 |
| 1  | 7  | 5  | 2.95  | 0.61 |
| -1 | -7 | 5  | 3.10  | 0.74 |
| -1 | 7  | -5 | 3.73  | 0.87 |
| -1 | -7 | 5  | 5.41  | 1.43 |
| -1 | -7 | 5  | 2.93  | 0.67 |
| -1 | 7  | -5 | 3.66  | 0.84 |
| 1  | 7  | 5  | 1.73  | 1.14 |
| -2 | -7 | -5 | 6.84  | 1.03 |
| 2  | -7 | 5  | 6.47  | 1.03 |
| 2  | -7 | 5  | 10.00 | 0.95 |



## CIF S3

|    |    |    |       |      |
|----|----|----|-------|------|
| 2  | 7  | -5 | 10.20 | 1.02 |
| -2 | 7  | 5  | 8.29  | 0.88 |
| 2  | 7  | -5 | 8.37  | 0.93 |
| 2  | -7 | 5  | 9.34  | 1.52 |
| 2  | -7 | -5 | 9.04  | 1.27 |
| -2 | -7 | 5  | 7.34  | 0.97 |
| -2 | -7 | 5  | 9.49  | 1.63 |
| -2 | 7  | -5 | 8.77  | 1.05 |
| -2 | 7  | -5 | 8.90  | 0.96 |
| -2 | 7  | -5 | 9.19  | 0.91 |
| 2  | 7  | 5  | 9.40  | 0.91 |
| -2 | -7 | 5  | 8.67  | 0.92 |
| -2 | -7 | 5  | 8.58  | 0.81 |
| 3  | 7  | -5 | 0.96  | 0.63 |
| 3  | -7 | 5  | 1.27  | 0.75 |
| -3 | -7 | -5 | 0.96  | 0.54 |
| -3 | -7 | -5 | 0.58  | 0.79 |
| -3 | 7  | 5  | 0.39  | 0.51 |
| -3 | -7 | -5 | -0.81 | 0.71 |
| 3  | 7  | -5 | 0.03  | 0.63 |
| 3  | -7 | 5  | 1.02  | 0.79 |
| -3 | -7 | 5  | 0.97  | 0.60 |
| 3  | 7  | 5  | 0.41  | 0.69 |
| -3 | -7 | 5  | 0.37  | 0.33 |
| 3  | -7 | -5 | 0.20  | 1.00 |
| -3 | -7 | 5  | 0.47  | 0.51 |
| -3 | 7  | -5 | 0.08  | 0.76 |
| -3 | 7  | -5 | 0.73  | 0.68 |
| -3 | -7 | 5  | 0.41  | 0.65 |
| -3 | -7 | 5  | 1.19  | 0.61 |
| 3  | -7 | -5 | 1.25  | 1.04 |
| -3 | 7  | -5 | 0.18  | 0.65 |
| -4 | -7 | -5 | 9.36  | 1.22 |
| -4 | -7 | -5 | 8.63  | 0.95 |
| 4  | -7 | 5  | 9.24  | 1.04 |
| -4 | -7 | -5 | 8.02  | 1.22 |
| 4  | 7  | -5 | 6.97  | 0.95 |
| -4 | 7  | 5  | 9.11  | 0.93 |
| -4 | -7 | -5 | 8.36  | 0.92 |
| -4 | -7 | -5 | 7.62  | 0.80 |
| -4 | 7  | 5  | 7.80  | 0.93 |

## CIF S3

|    |    |    |       |      |
|----|----|----|-------|------|
| -4 | 7  | 5  | 8.28  | 0.90 |
| 4  | 7  | -5 | 8.87  | 0.91 |
| 4  | 7  | 5  | 8.34  | 0.95 |
| -4 | -7 | 5  | 9.79  | 1.03 |
| -4 | -7 | 5  | 9.05  | 1.00 |
| 4  | -7 | -5 | 4.80  | 1.10 |
| -4 | 7  | -5 | 10.61 | 1.17 |
| -4 | -7 | 5  | 8.54  | 0.52 |
| -4 | -7 | 5  | 8.06  | 0.70 |
| -4 | 7  | -5 | 9.07  | 0.99 |
| -4 | -7 | 5  | 8.60  | 0.77 |
| -4 | -7 | 5  | 8.51  | 0.53 |
| -4 | 7  | -5 | 9.85  | 1.21 |
| 4  | -7 | -5 | 4.94  | 1.27 |
| -5 | -7 | -5 | 8.91  | 1.32 |
| 5  | 7  | -5 | 6.20  | 0.97 |
| -5 | -7 | -5 | 9.18  | 0.96 |
| -5 | 7  | 5  | 9.25  | 1.07 |
| -5 | -7 | -5 | 9.00  | 1.31 |
| -5 | 7  | 5  | 9.62  | 0.98 |
| -5 | -7 | -5 | 10.17 | 0.95 |
| -5 | -7 | -5 | 10.12 | 0.87 |
| -5 | -7 | -5 | 8.84  | 1.05 |
| -5 | 7  | -5 | 9.03  | 1.38 |
| -5 | 7  | -5 | 11.76 | 1.16 |
| -5 | -7 | 5  | 7.32  | 1.11 |
| 5  | -7 | -5 | 7.65  | 1.46 |
| -5 | -7 | 5  | 8.60  | 0.75 |
| -5 | 7  | -5 | 11.10 | 1.14 |
| 5  | -7 | -5 | 6.86  | 1.25 |
| -5 | 7  | -5 | 7.74  | 1.14 |
| -5 | -7 | 5  | 10.06 | 1.22 |
| 5  | 7  | 5  | 9.37  | 1.10 |
| -6 | -7 | -5 | 3.47  | 0.84 |
| -6 | -7 | -5 | 6.47  | 0.97 |
| -6 | -7 | -5 | 5.64  | 1.14 |
| -6 | 7  | 5  | 4.76  | 1.12 |
| -6 | 7  | 5  | 2.85  | 1.12 |
| -6 | 7  | 5  | 3.62  | 1.16 |
| -6 | -7 | -5 | 2.59  | 0.86 |
| -6 | -7 | -5 | 5.02  | 0.84 |

## CIF S3

|    |    |    |      |      |
|----|----|----|------|------|
| -6 | -7 | -5 | 5.27 | 0.75 |
| 6  | -7 | 5  | 6.25 | 1.57 |
| -6 | 7  | 5  | 5.69 | 0.98 |
| -6 | -7 | -5 | 4.52 | 0.60 |
| -6 | 7  | 5  | 6.15 | 0.79 |
| -6 | -7 | -5 | 3.27 | 1.48 |
| -6 | 7  | 5  | 5.69 | 1.49 |
| -6 | -7 | -5 | 3.76 | 1.18 |
| -6 | -7 | 5  | 5.85 | 0.64 |
| -6 | 7  | -5 | 5.19 | 0.98 |
| -6 | 7  | -5 | 3.74 | 1.79 |
| -6 | -7 | 5  | 5.21 | 0.86 |
| -6 | -7 | 5  | 4.29 | 1.16 |
| -6 | 7  | -5 | 4.15 | 0.95 |
| -6 | 7  | -5 | 5.92 | 1.05 |
| -6 | -7 | 5  | 4.92 | 0.59 |
| -6 | -7 | 5  | 4.87 | 0.99 |
| -7 | 7  | 5  | 3.66 | 0.90 |
| -7 | -7 | -5 | 3.77 | 0.81 |
| -7 | 7  | 5  | 5.02 | 0.86 |
| -7 | -7 | -5 | 5.07 | 0.79 |
| -7 | -7 | -5 | 6.45 | 1.36 |
| -7 | -7 | -5 | 6.18 | 1.20 |
| -7 | 7  | 5  | 4.13 | 0.79 |
| -7 | -7 | -5 | 4.63 | 0.90 |
| -7 | 7  | 5  | 5.90 | 0.99 |
| 7  | -7 | 5  | 6.67 | 1.14 |
| -7 | -7 | -5 | 3.86 | 0.80 |
| -7 | 7  | 5  | 2.82 | 0.77 |
| -7 | 7  | 5  | 3.77 | 0.80 |
| -7 | 7  | 5  | 4.51 | 0.80 |
| -7 | -7 | -5 | 3.68 | 0.71 |
| -7 | -7 | 5  | 6.07 | 1.13 |
| -7 | 7  | -5 | 3.40 | 1.02 |
| -7 | 7  | -5 | 5.09 | 0.96 |
| -7 | -7 | 5  | 5.20 | 0.40 |
| -7 | -7 | 5  | 4.48 | 0.36 |
| -7 | -7 | 5  | 5.98 | 0.43 |
| -7 | 7  | -5 | 5.30 | 0.89 |
| -8 | 7  | 5  | 1.47 | 0.40 |
| -8 | 7  | 5  | 1.85 | 0.45 |

## CIF S3

|    |    |    |       |      |
|----|----|----|-------|------|
| -8 | -7 | -5 | 1.39  | 0.50 |
| -8 | -7 | -5 | 2.64  | 0.60 |
| -8 | 7  | 5  | 1.24  | 0.44 |
| -8 | -7 | -5 | 2.45  | 1.11 |
| -8 | 7  | 5  | 1.25  | 0.46 |
| 8  | -7 | 5  | 1.60  | 0.57 |
| -8 | 7  | -5 | 1.11  | 0.60 |
| -8 | 7  | -5 | 1.93  | 0.56 |
| -8 | -7 | 5  | 1.82  | 0.71 |
| -8 | 7  | -5 | 2.21  | 0.50 |
| -8 | 7  | -5 | 1.67  | 0.52 |
| -8 | 7  | -5 | 1.17  | 0.85 |
| -8 | 7  | -5 | 1.70  | 0.55 |
| 9  | -7 | 5  | 0.49  | 0.43 |
| -9 | 7  | 5  | -0.02 | 0.29 |
| -9 | 7  | 5  | 0.37  | 0.37 |
| -9 | 7  | 5  | 0.27  | 0.28 |
| -9 | -7 | -5 | 0.68  | 0.33 |
| -9 | -7 | -5 | 0.19  | 0.15 |
| -9 | -7 | -5 | 0.59  | 0.22 |
| -9 | 7  | 5  | 1.01  | 0.24 |
| -9 | 7  | -5 | 1.15  | 0.39 |
| -9 | 7  | -5 | 0.51  | 0.36 |
| -9 | 7  | -5 | 1.02  | 0.40 |
| -9 | 7  | -5 | 0.62  | 0.37 |
| 0  | 8  | 5  | 5.59  | 0.79 |
| 0  | 8  | -5 | 5.04  | 1.12 |
| 0  | -8 | 5  | 4.89  | 0.87 |
| 0  | -8 | 5  | 5.56  | 1.16 |
| 0  | -8 | 5  | 6.07  | 0.87 |
| 0  | 8  | -5 | 4.84  | 1.03 |
| 1  | 8  | -5 | 25.63 | 1.86 |
| 1  | -8 | 5  | 26.71 | 1.70 |
| 1  | -8 | 5  | 26.90 | 1.74 |
| -1 | 8  | 5  | 28.62 | 1.69 |
| 1  | 8  | -5 | 29.40 | 1.86 |
| -1 | 8  | -5 | 29.66 | 1.86 |
| -1 | -8 | 5  | 33.17 | 1.87 |
| -1 | -8 | 5  | 27.56 | 1.70 |
| -1 | -8 | 5  | 26.41 | 1.75 |
| -1 | 8  | -5 | 28.48 | 1.93 |

## CIF S3

|    |    |    |       |      |
|----|----|----|-------|------|
| 1  | 8  | 5  | 28.56 | 1.68 |
| -1 | -8 | 5  | 28.12 | 1.68 |
| 2  | 8  | -5 | 1.05  | 0.74 |
| 2  | -8 | 5  | 0.58  | 0.64 |
| 2  | -8 | 5  | 1.11  | 0.71 |
| 2  | 8  | -5 | 1.18  | 0.80 |
| -2 | 8  | 5  | 0.54  | 0.57 |
| -2 | -8 | -5 | 0.47  | 0.66 |
| -2 | -8 | 5  | 2.01  | 0.77 |
| -2 | -8 | 5  | 0.79  | 0.65 |
| -2 | 8  | -5 | 1.63  | 0.66 |
| -2 | -8 | 5  | 0.72  | 0.64 |
| 2  | 8  | 5  | 0.81  | 0.80 |
| 2  | -8 | -5 | 3.52  | 1.40 |
| -2 | 8  | -5 | 0.78  | 0.69 |
| -2 | -8 | 5  | 0.70  | 0.64 |
| 3  | 8  | -5 | 1.20  | 0.73 |
| -3 | -8 | -5 | 0.84  | 0.78 |
| -3 | 8  | 5  | 0.97  | 0.67 |
| 3  | -8 | 5  | 1.52  | 0.76 |
| -3 | 8  | 5  | 1.55  | 0.64 |
| -3 | -8 | -5 | 0.41  | 0.82 |
| 3  | 8  | -5 | 1.41  | 0.77 |
| -3 | -8 | -5 | 0.74  | 0.63 |
| -3 | -8 | -5 | 1.75  | 0.70 |
| -3 | 8  | -5 | 1.71  | 0.71 |
| -3 | -8 | 5  | 1.39  | 0.69 |
| -3 | -8 | 5  | 1.38  | 0.52 |
| -3 | -8 | 5  | 1.83  | 0.73 |
| 3  | 8  | 5  | 0.24  | 0.71 |
| -3 | 8  | -5 | 1.96  | 0.82 |
| -3 | 8  | -5 | 2.56  | 0.91 |
| 3  | -8 | -5 | -0.52 | 1.03 |
| -3 | -8 | 5  | 2.26  | 0.63 |
| -3 | -8 | 5  | 1.70  | 0.41 |
| -3 | -8 | 5  | 1.87  | 0.72 |
| 4  | -8 | 5  | 11.38 | 1.19 |
| -4 | -8 | -5 | 11.93 | 1.00 |
| -4 | -8 | -5 | 9.10  | 1.19 |
| 4  | 8  | -5 | 11.80 | 1.10 |
| -4 | -8 | -5 | 9.75  | 1.32 |

## CIF S3

|    |    |    |       |      |
|----|----|----|-------|------|
| -4 | -8 | -5 | 11.08 | 1.06 |
| -4 | -8 | -5 | 8.82  | 1.03 |
| -4 | -8 | -5 | 10.34 | 1.31 |
| -4 | 8  | 5  | 10.83 | 1.02 |
| -4 | 8  | 5  | 11.20 | 1.11 |
| 4  | -8 | -5 | 9.41  | 1.42 |
| -4 | -8 | 5  | 10.02 | 1.14 |
| -4 | 8  | -5 | 12.82 | 1.21 |
| 4  | 8  | 5  | 8.86  | 1.16 |
| -4 | -8 | 5  | 10.96 | 0.68 |
| -4 | -8 | 5  | 11.66 | 1.16 |
| 4  | -8 | -5 | 8.91  | 1.59 |
| -4 | -8 | 5  | 10.65 | 0.87 |
| -4 | -8 | 5  | 10.41 | 0.93 |
| -4 | 8  | -5 | 12.89 | 1.14 |
| -4 | -8 | 5  | 9.65  | 1.20 |
| -4 | -8 | 5  | 12.27 | 0.68 |
| -4 | 8  | -5 | 10.66 | 1.33 |
| -5 | -8 | -5 | 14.52 | 1.22 |
| -5 | -8 | -5 | 13.49 | 1.33 |
| -5 | 8  | 5  | 14.71 | 1.16 |
| -5 | 8  | 5  | 13.72 | 1.28 |
| -5 | -8 | -5 | 12.85 | 1.13 |
| -5 | -8 | -5 | 13.44 | 1.09 |
| -5 | -8 | -5 | 11.85 | 1.45 |
| -5 | -8 | -5 | 14.33 | 1.11 |
| -5 | -8 | 5  | 13.75 | 1.29 |
| -5 | 8  | -5 | 13.28 | 1.30 |
| -5 | 8  | -5 | 13.02 | 1.36 |
| 5  | 8  | 5  | 14.11 | 1.66 |
| -5 | 8  | -5 | 14.37 | 1.23 |
| -5 | -8 | 5  | 15.05 | 0.98 |
| -5 | -8 | 5  | 12.12 | 1.44 |
| 5  | -8 | -5 | 8.78  | 2.00 |
| -6 | 8  | 5  | 1.51  | 0.58 |
| -6 | 8  | 5  | 1.11  | 0.76 |
| -6 | 8  | 5  | 2.73  | 0.70 |
| -6 | -8 | -5 | 2.84  | 0.76 |
| -6 | -8 | -5 | 0.94  | 1.03 |
| -6 | 8  | 5  | 1.64  | 0.88 |
| -6 | 8  | 5  | 2.33  | 0.71 |

## CIF S3

|    |    |    |       |      |
|----|----|----|-------|------|
| -6 | -8 | -5 | 2.20  | 0.65 |
| 6  | -8 | 5  | 2.42  | 0.72 |
| -6 | -8 | -5 | 2.47  | 0.64 |
| -6 | 8  | 5  | 1.84  | 0.63 |
| -6 | 8  | 5  | 2.17  | 0.70 |
| -6 | 8  | 5  | 1.77  | 0.66 |
| -6 | -8 | -5 | 3.14  | 1.11 |
| -6 | -8 | -5 | 1.99  | 0.67 |
| -6 | 8  | -5 | 1.09  | 0.95 |
| -6 | -8 | 5  | 1.12  | 0.54 |
| -6 | 8  | -5 | 3.30  | 0.84 |
| -6 | -8 | 5  | 1.49  | 0.75 |
| -6 | 8  | -5 | 2.73  | 1.08 |
| -6 | -8 | 5  | 3.07  | 0.53 |
| -6 | -8 | 5  | 2.91  | 0.48 |
| -6 | 8  | -5 | 3.55  | 0.75 |
| -6 | 8  | -5 | 1.42  | 0.72 |
| -6 | 8  | -5 | 1.28  | 0.67 |
| -6 | -8 | 5  | 1.36  | 0.90 |
| -7 | 8  | 5  | 12.31 | 1.01 |
| -7 | 8  | 5  | 11.44 | 1.03 |
| -7 | -8 | -5 | 11.14 | 1.23 |
| -7 | 8  | 5  | 9.81  | 1.13 |
| -7 | 8  | 5  | 11.85 | 1.02 |
| -7 | -8 | -5 | 11.63 | 0.96 |
| -7 | -8 | -5 | 10.44 | 1.26 |
| -7 | 8  | 5  | 10.10 | 0.99 |
| 7  | -8 | 5  | 13.16 | 1.13 |
| -7 | -8 | -5 | 10.12 | 1.31 |
| -7 | -8 | -5 | 11.59 | 0.96 |
| -7 | 8  | 5  | 10.84 | 0.92 |
| -7 | 8  | 5  | 12.92 | 1.33 |
| -7 | -8 | 5  | 10.59 | 1.25 |
| -7 | -8 | 5  | 13.27 | 0.68 |
| -7 | 8  | -5 | 11.67 | 1.13 |
| -7 | -8 | 5  | 11.46 | 0.65 |
| -7 | 8  | -5 | 13.08 | 1.07 |
| -7 | -8 | 5  | 11.27 | 0.68 |
| -7 | 8  | -5 | 9.78  | 1.48 |
| -8 | 8  | 5  | 5.94  | 0.65 |
| -8 | -8 | -5 | 5.60  | 0.61 |

## CIF S3

|    |    |    |       |      |
|----|----|----|-------|------|
| -8 | 8  | 5  | 6.54  | 0.65 |
| -8 | -8 | -5 | 5.72  | 0.68 |
| -8 | 8  | 5  | 5.98  | 0.69 |
| 8  | -8 | 5  | 5.87  | 0.95 |
| -8 | 8  | 5  | 7.14  | 0.76 |
| -8 | 8  | -5 | 5.85  | 0.79 |
| -8 | -8 | 5  | 4.02  | 0.94 |
| -8 | 8  | -5 | 6.22  | 0.72 |
| -8 | 8  | -5 | 7.80  | 1.01 |
| -8 | 8  | -5 | 5.73  | 0.70 |
| -8 | 8  | -5 | 5.40  | 1.20 |
| -8 | 8  | -5 | 7.43  | 1.04 |
| -9 | -8 | -5 | 0.49  | 0.30 |
| -9 | 8  | 5  | 0.36  | 0.25 |
| -9 | 8  | 5  | -0.09 | 0.22 |
| -9 | 8  | 5  | 0.35  | 0.30 |
| 9  | -8 | 5  | 0.36  | 0.29 |
| -9 | -8 | -5 | 0.56  | 0.23 |
| -9 | 8  | -5 | 0.52  | 0.32 |
| -9 | 8  | -5 | 0.08  | 0.31 |
| -9 | 8  | -5 | 0.56  | 0.30 |
| -9 | 8  | -5 | 0.23  | 0.30 |
| 0  | -9 | 5  | 17.27 | 1.23 |
| 0  | -9 | 5  | 18.67 | 1.31 |
| 0  | 9  | -5 | 16.30 | 1.59 |
| 0  | -9 | 5  | 16.63 | 1.32 |
| 0  | 9  | -5 | 16.52 | 1.53 |
| 0  | 9  | 5  | 16.61 | 1.27 |
| 1  | -9 | 5  | 37.70 | 2.30 |
| 1  | 9  | -5 | 38.62 | 2.44 |
| 1  | -9 | 5  | 39.68 | 2.25 |
| 1  | 9  | -5 | 38.60 | 2.54 |
| 1  | -9 | 5  | 43.29 | 2.26 |
| -1 | 9  | 5  | 43.85 | 2.31 |
| -1 | -9 | 5  | 39.03 | 2.26 |
| -1 | -9 | 5  | 37.49 | 2.21 |
| -1 | 9  | -5 | 37.48 | 2.47 |
| -1 | -9 | 5  | 37.30 | 2.22 |
| 1  | 9  | 5  | 41.65 | 2.27 |
| -1 | -9 | 5  | 38.49 | 2.20 |
| -1 | 9  | -5 | 41.25 | 2.46 |



## CIF S3

|    |    |    |       |      |
|----|----|----|-------|------|
| -2 | -9 | -5 | 16.08 | 1.30 |
| -2 | -9 | -5 | 16.66 | 1.25 |
| -2 | 9  | 5  | 15.56 | 1.22 |
| 2  | -9 | 5  | 16.92 | 1.30 |
| 2  | 9  | -5 | 14.49 | 1.36 |
| 2  | 9  | -5 | 13.73 | 1.47 |
| -2 | 9  | 5  | 15.04 | 1.29 |
| 2  | -9 | 5  | 16.32 | 1.30 |
| -2 | -9 | 5  | 16.85 | 1.23 |
| -2 | 9  | -5 | 17.75 | 1.31 |
| -2 | -9 | 5  | 15.57 | 1.16 |
| -2 | 9  | -5 | 18.32 | 1.57 |
| -2 | -9 | 5  | 15.45 | 1.38 |
| -2 | -9 | 5  | 14.45 | 1.29 |
| 3  | 9  | -5 | 13.49 | 1.34 |
| 3  | -9 | 5  | 15.43 | 1.30 |
| 3  | 9  | -5 | 14.84 | 1.40 |
| -3 | -9 | -5 | 14.46 | 1.45 |
| -3 | -9 | -5 | 13.70 | 1.16 |
| -3 | 9  | 5  | 14.55 | 1.17 |
| -3 | -9 | -5 | 13.46 | 1.36 |
| -3 | -9 | -5 | 11.87 | 1.08 |
| -3 | 9  | 5  | 14.44 | 1.17 |
| -3 | -9 | -5 | 14.63 | 1.22 |
| -3 | -9 | 5  | 15.82 | 1.04 |
| -3 | 9  | -5 | 14.13 | 1.26 |
| -3 | -9 | 5  | 12.88 | 1.17 |
| 3  | 9  | 5  | 11.07 | 1.33 |
| -3 | -9 | 5  | 13.46 | 1.25 |
| -3 | 9  | -5 | 15.86 | 1.59 |
| -3 | -9 | 5  | 12.31 | 0.94 |
| -3 | 9  | -5 | 14.22 | 1.36 |
| -3 | -9 | 5  | 14.87 | 1.39 |
| -3 | -9 | 5  | 15.28 | 1.13 |
| -3 | -9 | 5  | 14.17 | 1.41 |
| -4 | -9 | -5 | 9.89  | 1.11 |
| -4 | 9  | 5  | 11.35 | 1.07 |
| 4  | -9 | 5  | 11.63 | 1.24 |
| -4 | -9 | -5 | 14.07 | 1.33 |
| 4  | 9  | -5 | 13.05 | 1.28 |
| -4 | -9 | -5 | 12.06 | 1.06 |

## CIF S3

|    |    |    |       |      |
|----|----|----|-------|------|
| -4 | -9 | -5 | 10.72 | 1.35 |
| -4 | -9 | -5 | 12.54 | 1.15 |
| -4 | 9  | 5  | 11.34 | 1.07 |
| -4 | -9 | -5 | 10.92 | 1.23 |
| -4 | -9 | 5  | 11.88 | 1.01 |
| -4 | -9 | 5  | 10.97 | 1.24 |
| -4 | -9 | 5  | 10.41 | 0.67 |
| -4 | 9  | -5 | 10.97 | 1.16 |
| 4  | 9  | 5  | 5.72  | 1.21 |
| -4 | -9 | 5  | 10.90 | 1.26 |
| -4 | 9  | -5 | 12.65 | 1.33 |
| -4 | -9 | 5  | 9.12  | 0.70 |
| -4 | 9  | -5 | 8.79  | 1.33 |
| 4  | -9 | -5 | 7.51  | 1.52 |
| -4 | -9 | 5  | 12.11 | 1.21 |
| -5 | 9  | 5  | 12.84 | 1.24 |
| -5 | 9  | 5  | 14.16 | 1.14 |
| -5 | 9  | 5  | 13.26 | 1.56 |
| -5 | -9 | -5 | 13.82 | 0.99 |
| -5 | -9 | -5 | 11.77 | 1.46 |
| -5 | -9 | -5 | 12.97 | 1.16 |
| -5 | 9  | 5  | 10.53 | 1.22 |
| 5  | -9 | 5  | 12.46 | 1.20 |
| -5 | -9 | -5 | 14.02 | 1.55 |
| -5 | 9  | 5  | 13.30 | 1.27 |
| -5 | -9 | -5 | 11.83 | 1.21 |
| -5 | -9 | -5 | 11.76 | 1.11 |
| -5 | -9 | -5 | 13.25 | 1.18 |
| -5 | 9  | -5 | 8.65  | 1.30 |
| -5 | -9 | 5  | 12.76 | 0.87 |
| -5 | -9 | 5  | 12.03 | 0.89 |
| -5 | -9 | 5  | 12.14 | 1.31 |
| -5 | 9  | -5 | 12.27 | 1.18 |
| -5 | -9 | 5  | 13.10 | 0.92 |
| -5 | 9  | -5 | 11.97 | 1.55 |
| -5 | -9 | 5  | 14.23 | 1.34 |
| -5 | -9 | 5  | 12.81 | 0.94 |
| -6 | 9  | 5  | 4.82  | 0.86 |
| -6 | -9 | -5 | 4.08  | 0.81 |
| -6 | -9 | -5 | 5.90  | 0.94 |
| -6 | 9  | 5  | 5.00  | 0.85 |

## CIF S3

|    |    |    |      |      |
|----|----|----|------|------|
| -6 | -9 | -5 | 5.67 | 0.94 |
| 6  | -9 | 5  | 5.17 | 0.89 |
| -6 | -9 | -5 | 4.89 | 0.90 |
| -6 | 9  | 5  | 4.95 | 0.87 |
| -6 | 9  | 5  | 4.03 | 0.95 |
| -6 | 9  | 5  | 5.25 | 1.00 |
| -6 | -9 | -5 | 5.01 | 1.29 |
| -6 | -9 | -5 | 4.63 | 1.06 |
| -6 | 9  | 5  | 3.65 | 1.10 |
| -6 | -9 | -5 | 4.21 | 0.88 |
| -6 | 9  | 5  | 4.82 | 0.93 |
| -6 | 9  | 5  | 4.80 | 0.91 |
| -6 | 9  | -5 | 4.60 | 0.93 |
| -6 | -9 | 5  | 5.30 | 0.85 |
| -6 | 9  | -5 | 5.40 | 1.08 |
| -6 | -9 | 5  | 4.59 | 1.03 |
| -6 | -9 | 5  | 4.95 | 1.21 |
| -6 | -9 | 5  | 5.51 | 0.57 |
| -6 | 9  | -5 | 5.29 | 0.76 |
| -6 | 9  | -5 | 5.11 | 1.12 |
| -7 | 9  | 5  | 1.74 | 0.50 |
| 7  | -9 | 5  | 1.39 | 0.55 |
| -7 | -9 | -5 | 4.03 | 0.73 |
| -7 | 9  | 5  | 2.90 | 0.71 |
| -7 | 9  | 5  | 3.07 | 0.69 |
| -7 | 9  | 5  | 2.55 | 0.61 |
| -7 | -9 | -5 | 2.22 | 0.54 |
| -7 | -9 | -5 | 1.71 | 0.51 |
| -7 | 9  | 5  | 2.77 | 0.56 |
| -7 | 9  | 5  | 4.14 | 0.73 |
| -7 | -9 | -5 | 1.49 | 0.91 |
| -7 | -9 | 5  | 2.81 | 0.35 |
| -7 | 9  | -5 | 1.23 | 0.86 |
| -7 | 9  | -5 | 3.76 | 0.86 |
| -7 | -9 | 5  | 3.54 | 0.29 |
| -7 | 9  | -5 | 2.38 | 0.59 |
| -7 | -9 | 5  | 3.01 | 0.75 |
| -7 | -9 | 5  | 2.77 | 0.33 |
| -7 | -9 | 5  | 2.36 | 0.80 |
| -8 | -9 | -5 | 8.57 | 0.65 |
| -8 | 9  | 5  | 7.35 | 0.67 |

## CIF S3

|    |     |    |       |      |
|----|-----|----|-------|------|
| 8  | -9  | 5  | 7.25  | 0.76 |
| -8 | -9  | -5 | 7.94  | 0.76 |
| -8 | 9   | 5  | 7.34  | 0.69 |
| -8 | 9   | 5  | 7.09  | 0.68 |
| -8 | 9   | 5  | 7.59  | 0.64 |
| -8 | 9   | -5 | 7.23  | 0.67 |
| -8 | 9   | -5 | 7.51  | 1.03 |
| -8 | 9   | -5 | 8.35  | 0.73 |
| 0  | -10 | -5 | -0.38 | 0.90 |
| 0  | 10  | -5 | 0.52  | 0.78 |
| 0  | 10  | -5 | 0.62  | 0.99 |
| 0  | -10 | 5  | 0.62  | 0.72 |
| 0  | -10 | 5  | -0.13 | 0.72 |
| 0  | -10 | 5  | 1.45  | 0.78 |
| 0  | -10 | 5  | 0.62  | 0.84 |
| 0  | 10  | 5  | -0.05 | 0.70 |
| -1 | -10 | -5 | 5.28  | 1.07 |
| 1  | 10  | -5 | 3.45  | 1.13 |
| -1 | -10 | -5 | 2.54  | 0.94 |
| 1  | -10 | 5  | 4.50  | 1.06 |
| 1  | -10 | 5  | 4.08  | 0.93 |
| -1 | 10  | 5  | 4.55  | 0.96 |
| 1  | 10  | -5 | 3.03  | 1.43 |
| 1  | -10 | 5  | 4.16  | 0.87 |
| 1  | -10 | -5 | 4.82  | 1.28 |
| -1 | -10 | 5  | 4.05  | 0.77 |
| -1 | 10  | -5 | 3.83  | 1.07 |
| 1  | 10  | 5  | 4.81  | 0.89 |
| -1 | -10 | 5  | 4.15  | 0.93 |
| -1 | -10 | 5  | 4.32  | 0.98 |
| -1 | -10 | 5  | 4.58  | 1.06 |
| -2 | 10  | 5  | 53.58 | 2.86 |
| 2  | -10 | 5  | 49.53 | 2.83 |
| -2 | -10 | -5 | 50.23 | 2.79 |
| -2 | -10 | -5 | 49.37 | 2.79 |
| 2  | -10 | 5  | 49.76 | 2.85 |
| -2 | -10 | 5  | 51.91 | 2.71 |
| -2 | 10  | -5 | 52.07 | 2.92 |
| -2 | -10 | 5  | 50.19 | 2.76 |
| -2 | 10  | -5 | 53.09 | 3.10 |
| 2  | -10 | -5 | 51.32 | 2.98 |

## CIF S3

|    |     |    |       |      |
|----|-----|----|-------|------|
| -2 | -10 | 5  | 46.93 | 2.85 |
| -2 | -10 | 5  | 50.17 | 2.64 |
| -2 | -10 | 5  | 54.44 | 2.81 |
| -3 | 10  | 5  | 8.79  | 1.16 |
| -3 | -10 | -5 | 8.72  | 1.23 |
| -3 | -10 | -5 | 9.32  | 1.05 |
| -3 | -10 | -5 | 10.39 | 1.23 |
| -3 | 10  | 5  | 9.08  | 1.02 |
| -3 | -10 | -5 | 8.87  | 1.22 |
| -3 | -10 | -5 | 7.05  | 1.15 |
| 3  | -10 | 5  | 9.96  | 1.18 |
| -3 | -10 | 5  | 9.39  | 1.07 |
| -3 | -10 | 5  | 7.84  | 1.30 |
| -3 | 10  | -5 | 9.35  | 1.22 |
| -3 | 10  | -5 | 10.61 | 1.36 |
| -3 | -10 | 5  | 8.78  | 1.05 |
| -3 | -10 | 5  | 9.07  | 0.91 |
| -3 | -10 | 5  | 9.11  | 0.79 |
| -3 | -10 | 5  | 8.03  | 1.33 |
| -4 | 10  | 5  | 16.56 | 1.41 |
| -4 | 10  | 5  | 17.11 | 1.43 |
| -4 | -10 | -5 | 19.71 | 1.34 |
| -4 | -10 | -5 | 19.09 | 1.42 |
| -4 | -10 | -5 | 17.13 | 1.41 |
| 4  | -10 | 5  | 16.23 | 1.48 |
| -4 | -10 | -5 | 19.34 | 1.41 |
| -4 | 10  | 5  | 18.26 | 1.13 |
| -4 | -10 | -5 | 21.71 | 1.57 |
| -4 | 10  | 5  | 16.22 | 1.34 |
| -4 | 10  | 5  | 18.96 | 1.58 |
| -4 | -10 | -5 | 17.73 | 1.34 |
| -4 | -10 | -5 | 17.36 | 1.55 |
| -4 | 10  | 5  | 17.30 | 1.31 |
| -4 | -10 | 5  | 18.51 | 1.25 |
| -4 | -10 | 5  | 18.67 | 1.25 |
| 4  | -10 | -5 | 14.16 | 1.70 |
| -4 | -10 | 5  | 17.95 | 1.19 |
| -4 | -10 | 5  | 18.97 | 1.46 |
| -4 | -10 | 5  | 17.41 | 1.49 |
| -4 | -10 | 5  | 18.01 | 1.23 |
| -4 | 10  | -5 | 19.56 | 1.51 |

## CIF S3

|    |     |    |       |      |
|----|-----|----|-------|------|
| -4 | -10 | 5  | 18.84 | 1.54 |
| -4 | 10  | -5 | 18.22 | 1.57 |
| -5 | 10  | 5  | 5.92  | 1.24 |
| -5 | -10 | -5 | 4.87  | 1.03 |
| 5  | -10 | 5  | 5.44  | 0.83 |
| -5 | -10 | -5 | 4.68  | 0.98 |
| -5 | -10 | -5 | 6.09  | 1.26 |
| -5 | 10  | 5  | 5.39  | 0.94 |
| -5 | -10 | -5 | 6.30  | 1.00 |
| -5 | 10  | 5  | 5.81  | 1.07 |
| -5 | -10 | -5 | 6.61  | 1.27 |
| -5 | 10  | 5  | 4.65  | 1.09 |
| -5 | -10 | -5 | 4.58  | 1.12 |
| -5 | 10  | 5  | 6.02  | 0.99 |
| -5 | -10 | -5 | 5.96  | 1.02 |
| -5 | -10 | -5 | 6.82  | 1.01 |
| -5 | -10 | -5 | 6.25  | 0.70 |
| -5 | -10 | 5  | 7.65  | 1.15 |
| -5 | -10 | 5  | 5.70  | 1.14 |
| -5 | -10 | 5  | 6.06  | 0.67 |
| -5 | -10 | 5  | 7.93  | 1.33 |
| 5  | -10 | -5 | 3.57  | 1.12 |
| -5 | -10 | 5  | 6.21  | 0.69 |
| -5 | -10 | 5  | 5.42  | 0.69 |
| -5 | 10  | -5 | 4.81  | 1.27 |
| -5 | -10 | 5  | 7.28  | 0.76 |
| -5 | -10 | 5  | 5.72  | 0.74 |
| -6 | 10  | 5  | 1.63  | 0.78 |
| 6  | -10 | 5  | 1.48  | 0.50 |
| -6 | 10  | 5  | 1.36  | 0.63 |
| -6 | -10 | -5 | 1.19  | 0.60 |
| -6 | 10  | 5  | 1.80  | 0.56 |
| -6 | -10 | -5 | 0.82  | 0.89 |
| -6 | -10 | -5 | 3.45  | 0.88 |
| -6 | 10  | 5  | 1.07  | 0.57 |
| -6 | 10  | 5  | 0.88  | 0.62 |
| -6 | 10  | 5  | 1.92  | 0.54 |
| -6 | 10  | 5  | 1.53  | 0.57 |
| -6 | -10 | -5 | 0.66  | 0.56 |
| -6 | -10 | -5 | 1.55  | 0.59 |
| -6 | -10 | -5 | 1.46  | 1.35 |

## CIF S3

|    |     |    |      |      |
|----|-----|----|------|------|
| -6 | 10  | -5 | 1.88 | 0.67 |
| -6 | -10 | 5  | 1.94 | 0.70 |
| -6 | -10 | 5  | 1.35 | 0.84 |
| -6 | 10  | -5 | 1.05 | 0.42 |
| 6  | -10 | -5 | 1.85 | 1.29 |
| -6 | 10  | -5 | 0.43 | 0.93 |
| -6 | -10 | 5  | 1.45 | 0.58 |
| -6 | -10 | 5  | 1.31 | 0.34 |
| -7 | -10 | -5 | 0.55 | 0.49 |
| -7 | 10  | 5  | 0.84 | 0.47 |
| -7 | 10  | 5  | 0.53 | 0.43 |
| -7 | -10 | -5 | 0.56 | 0.45 |
| -7 | -10 | -5 | 0.89 | 0.48 |
| 7  | -10 | 5  | 0.76 | 0.37 |
| -7 | 10  | 5  | 1.37 | 0.44 |
| -7 | 10  | 5  | 1.67 | 0.46 |
| -7 | 10  | 5  | 1.52 | 0.39 |
| -7 | 10  | -5 | 0.29 | 0.48 |
| 7  | -10 | -5 | 0.53 | 0.69 |
| -7 | -10 | 5  | 1.70 | 0.26 |
| -7 | -10 | 5  | 1.51 | 0.65 |
| -7 | 10  | -5 | 0.84 | 0.73 |
| -8 | 10  | 5  | 2.44 | 0.50 |
| -8 | -10 | -5 | 3.86 | 0.52 |
| -8 | -10 | -5 | 3.93 | 0.57 |
| -8 | 10  | 5  | 2.64 | 0.45 |
| -8 | -10 | -5 | 3.15 | 0.28 |
| -8 | 10  | 5  | 3.32 | 0.39 |
| -8 | 10  | 5  | 2.82 | 0.42 |
| -8 | 10  | -5 | 1.49 | 0.53 |
| 8  | -10 | -5 | 3.78 | 0.69 |
| -8 | 10  | -5 | 2.81 | 0.45 |
| -8 | 10  | -5 | 3.59 | 0.54 |
| 0  | -11 | -5 | 5.78 | 1.17 |
| 0  | -11 | -5 | 5.02 | 1.64 |
| 0  | -11 | -5 | 4.87 | 1.01 |
| 0  | -11 | 5  | 7.43 | 1.73 |
| 0  | -11 | 5  | 5.33 | 1.06 |
| 0  | -11 | 5  | 5.83 | 1.77 |
| 0  | -11 | 5  | 6.45 | 1.03 |
| 0  | -11 | 5  | 6.70 | 1.19 |

## CIF S3

|    |     |    |       |      |
|----|-----|----|-------|------|
| 0  | 11  | 5  | 5.90  | 1.03 |
| 0  | -11 | -5 | 5.79  | 1.28 |
| 0  | -11 | 5  | 8.05  | 1.08 |
| -1 | -11 | -5 | 4.95  | 1.23 |
| -1 | 11  | 5  | 5.42  | 1.09 |
| 1  | -11 | 5  | 5.17  | 1.03 |
| -1 | -11 | -5 | 3.84  | 1.46 |
| -1 | 11  | 5  | 4.63  | 0.94 |
| 1  | -11 | 5  | 3.31  | 0.94 |
| 1  | -11 | 5  | 3.31  | 1.02 |
| 1  | -11 | 5  | 3.50  | 1.05 |
| 1  | -11 | 5  | 4.10  | 1.10 |
| 1  | -11 | 5  | 2.88  | 0.88 |
| 1  | -11 | 5  | 1.89  | 0.60 |
| -1 | -11 | -5 | 3.71  | 1.47 |
| -1 | -11 | -5 | 3.15  | 0.92 |
| -1 | -11 | 5  | 3.85  | 1.00 |
| -1 | -11 | 5  | 4.20  | 0.94 |
| 1  | -11 | -5 | 4.14  | 1.15 |
| 1  | -11 | -5 | 2.82  | 0.95 |
| -1 | -11 | 5  | 4.71  | 1.45 |
| -1 | -11 | 5  | 3.96  | 0.99 |
| -1 | -11 | 5  | 3.93  | 0.98 |
| -1 | -11 | 5  | 2.48  | 1.02 |
| -1 | -11 | 5  | 3.85  | 0.93 |
| -1 | -11 | 5  | 6.30  | 1.04 |
| 2  | -11 | 5  | 6.99  | 1.49 |
| -2 | -11 | -5 | 9.21  | 1.22 |
| -2 | -11 | -5 | 9.48  | 1.27 |
| -2 | -11 | -5 | 9.94  | 1.26 |
| -2 | -11 | -5 | 9.45  | 1.30 |
| 2  | -11 | 5  | 9.97  | 1.27 |
| -2 | 11  | 5  | 8.70  | 1.07 |
| 2  | -11 | 5  | 7.48  | 1.35 |
| -2 | 11  | 5  | 10.33 | 1.07 |
| -2 | -11 | -5 | 10.21 | 1.26 |
| -2 | -11 | -5 | 9.67  | 1.68 |
| 2  | -11 | 5  | 10.39 | 1.51 |
| -2 | -11 | 5  | 9.20  | 1.17 |
| -2 | -11 | 5  | 8.87  | 1.10 |
| -2 | -11 | 5  | 10.55 | 1.27 |



## CIF S3

|    |     |    |       |      |
|----|-----|----|-------|------|
| -2 | -11 | 5  | 9.48  | 0.84 |
| 2  | -11 | -5 | 9.95  | 1.22 |
| -2 | -11 | 5  | 7.67  | 1.29 |
| 2  | -11 | -5 | 11.29 | 1.32 |
| -2 | -11 | 5  | 9.36  | 1.08 |
| -2 | -11 | 5  | 10.84 | 1.00 |
| -2 | -11 | 5  | 10.30 | 1.02 |
| -2 | -11 | 5  | 8.82  | 1.20 |
| -3 | -11 | -5 | 7.15  | 1.21 |
| -3 | 11  | 5  | 8.09  | 1.55 |
| -3 | 11  | 5  | 8.01  | 1.56 |
| -3 | -11 | -5 | 9.48  | 1.32 |
| -3 | -11 | -5 | 7.59  | 1.26 |
| -3 | -11 | -5 | 7.12  | 1.12 |
| -3 | 11  | 5  | 6.99  | 1.13 |
| 3  | -11 | 5  | 7.65  | 1.23 |
| -3 | 11  | 5  | 8.73  | 1.18 |
| -3 | -11 | -5 | 9.09  | 1.26 |
| 3  | -11 | 5  | 10.13 | 1.52 |
| -3 | -11 | -5 | 9.86  | 1.61 |
| -3 | -11 | 5  | 8.66  | 1.29 |
| -3 | -11 | 5  | 8.08  | 1.14 |
| -3 | 11  | -5 | 8.36  | 1.63 |
| -3 | -11 | 5  | 7.37  | 1.16 |
| -3 | -11 | 5  | 9.93  | 1.27 |
| -3 | -11 | 5  | 7.79  | 0.93 |
| 3  | -11 | -5 | 8.53  | 1.23 |
| -3 | -11 | 5  | 8.69  | 1.04 |
| -3 | -11 | 5  | 8.60  | 0.96 |
| -3 | -11 | 5  | 7.66  | 0.88 |
| -4 | 11  | 5  | 9.18  | 1.45 |
| -4 | -11 | -5 | 9.33  | 1.24 |
| -4 | 11  | 5  | 11.63 | 1.19 |
| -4 | -11 | -5 | 12.13 | 1.25 |
| -4 | -11 | -5 | 11.95 | 1.18 |
| -4 | 11  | 5  | 11.02 | 0.78 |
| -4 | -11 | -5 | 9.61  | 1.15 |
| -4 | -11 | -5 | 9.96  | 1.24 |
| -4 | 11  | 5  | 13.19 | 1.12 |
| -4 | -11 | -5 | 9.11  | 1.31 |
| -4 | 11  | 5  | 10.97 | 1.10 |

## CIF S3

|    |     |    |       |      |
|----|-----|----|-------|------|
| -4 | -11 | -5 | 9.86  | 1.00 |
| -4 | -11 | 5  | 9.89  | 1.21 |
| -4 | -11 | 5  | 10.40 | 0.96 |
| 4  | -11 | -5 | 10.78 | 1.28 |
| -4 | -11 | 5  | 9.13  | 0.97 |
| -4 | -11 | 5  | 11.11 | 1.20 |
| -4 | -11 | 5  | 10.80 | 0.95 |
| -4 | -11 | 5  | 10.83 | 1.29 |
| -4 | -11 | 5  | 11.00 | 0.96 |
| -5 | 11  | 5  | 3.21  | 0.94 |
| -5 | 11  | 5  | 4.35  | 0.84 |
| -5 | 11  | 5  | 4.72  | 0.96 |
| -5 | -11 | -5 | 4.06  | 1.24 |
| -5 | -11 | -5 | 3.56  | 0.84 |
| -5 | 11  | 5  | 3.50  | 0.90 |
| -5 | -11 | -5 | 6.17  | 1.02 |
| -5 | -11 | -5 | 2.84  | 0.88 |
| -5 | -11 | -5 | 5.64  | 0.95 |
| -5 | -11 | -5 | 3.25  | 0.92 |
| -5 | -11 | -5 | 2.72  | 0.72 |
| -5 | -11 | 5  | 4.34  | 0.68 |
| -5 | -11 | 5  | 5.61  | 0.63 |
| -5 | -11 | 5  | 4.98  | 0.92 |
| -5 | -11 | 5  | 5.82  | 1.28 |
| -5 | 11  | -5 | 5.09  | 1.23 |
| 5  | -11 | -5 | 5.23  | 1.12 |
| -5 | -11 | 5  | 2.91  | 0.76 |
| -5 | -11 | 5  | 5.14  | 0.65 |
| -6 | 11  | 5  | 1.29  | 0.50 |
| -6 | 11  | 5  | 0.14  | 0.44 |
| -6 | 11  | 5  | 0.94  | 0.42 |
| -6 | 11  | 5  | 0.75  | 0.53 |
| -6 | -11 | -5 | 0.36  | 0.62 |
| -6 | 11  | 5  | 0.97  | 0.56 |
| -6 | -11 | -5 | 0.31  | 0.47 |
| -6 | -11 | -5 | 0.64  | 0.53 |
| -6 | -11 | -5 | 0.46  | 0.56 |
| -6 | 11  | 5  | 0.89  | 0.48 |
| -6 | 11  | 5  | 0.69  | 0.62 |
| -6 | 11  | -5 | 0.58  | 0.84 |
| -6 | -11 | 5  | 0.53  | 0.35 |

## CIF S3

|    |     |    |       |      |
|----|-----|----|-------|------|
| -6 | 11  | -5 | 0.98  | 0.34 |
| -6 | 11  | -5 | 0.18  | 0.63 |
| 6  | -11 | -5 | 1.55  | 0.67 |
| -6 | -11 | 5  | 1.17  | 0.29 |
| -6 | -11 | 5  | 0.92  | 0.61 |
| -7 | 11  | 5  | 0.34  | 0.32 |
| -7 | 11  | 5  | 0.50  | 0.31 |
| -7 | 11  | 5  | 0.52  | 0.32 |
| -7 | 11  | 5  | 0.55  | 0.40 |
| -7 | -11 | -5 | 0.04  | 0.32 |
| -7 | 11  | 5  | 0.34  | 0.38 |
| -7 | -11 | -5 | 0.46  | 0.29 |
| -7 | -11 | -5 | -0.03 | 0.39 |
| -7 | 11  | -5 | 0.68  | 0.31 |
| -7 | 11  | -5 | -0.40 | 0.39 |
| 7  | -11 | -5 | 0.00  | 0.48 |
| -7 | 11  | -5 | 0.36  | 0.62 |
| 0  | -12 | 5  | 20.92 | 1.54 |
| 0  | -12 | -5 | 17.79 | 1.65 |
| 0  | -12 | 5  | 25.84 | 1.48 |
| 0  | -12 | 5  | 19.15 | 1.92 |
| 0  | -12 | 5  | 20.11 | 1.61 |
| 0  | -12 | -5 | 19.25 | 1.19 |
| 0  | -12 | 5  | 19.03 | 1.46 |
| 0  | -12 | 5  | 20.89 | 1.66 |
| 0  | -12 | 5  | 20.25 | 1.53 |
| 1  | -12 | 5  | 11.74 | 1.23 |
| 1  | -12 | 5  | 11.47 | 1.39 |
| 1  | -12 | 5  | 11.13 | 1.65 |
| -1 | -12 | -5 | 11.83 | 1.41 |
| -1 | 12  | 5  | 12.18 | 1.11 |
| 1  | -12 | 5  | 10.80 | 1.22 |
| 1  | -12 | 5  | 11.62 | 1.17 |
| 1  | -12 | 5  | 12.00 | 1.21 |
| -1 | -12 | -5 | 11.09 | 1.31 |
| 1  | -12 | 5  | 10.65 | 1.47 |
| -1 | -12 | -5 | 12.81 | 1.50 |
| -1 | -12 | 5  | 11.52 | 1.14 |
| -1 | -12 | 5  | 10.01 | 1.14 |
| 1  | -12 | -5 | 12.57 | 1.31 |
| -1 | -12 | 5  | 12.57 | 1.13 |

## CIF S3

|    |     |    |       |      |
|----|-----|----|-------|------|
| -1 | -12 | 5  | 10.77 | 1.32 |
| -1 | -12 | 5  | 11.79 | 1.31 |
| -1 | -12 | 5  | 11.52 | 1.41 |
| -1 | -12 | 5  | 11.70 | 1.38 |
| 1  | -12 | -5 | 11.44 | 1.12 |
| -1 | -12 | 5  | 11.65 | 1.04 |
| -2 | -12 | -5 | 13.39 | 1.37 |
| 2  | -12 | 5  | 14.06 | 1.47 |
| 2  | -12 | 5  | 11.51 | 1.42 |
| 2  | -12 | 5  | 13.12 | 1.35 |
| -2 | -12 | -5 | 11.98 | 1.38 |
| 2  | -12 | 5  | 13.79 | 1.66 |
| -2 | -12 | -5 | 14.15 | 1.24 |
| -2 | 12  | 5  | 13.22 | 1.18 |
| -2 | -12 | -5 | 12.48 | 1.67 |
| -2 | -12 | 5  | 12.11 | 1.24 |
| -2 | -12 | 5  | 12.09 | 1.34 |
| 2  | -12 | -5 | 11.32 | 1.23 |
| -2 | -12 | 5  | 10.88 | 1.16 |
| -2 | -12 | 5  | 14.04 | 1.26 |
| -2 | -12 | 5  | 13.70 | 1.11 |
| -2 | -12 | 5  | 13.22 | 1.13 |
| -2 | -12 | 5  | 14.38 | 1.23 |
| -3 | -12 | -5 | 19.73 | 1.46 |
| -3 | -12 | -5 | 19.59 | 1.41 |
| -3 | 12  | 5  | 17.36 | 1.65 |
| 3  | -12 | 5  | 18.57 | 1.51 |
| -3 | -12 | -5 | 17.13 | 1.46 |
| -3 | -12 | -5 | 19.43 | 1.34 |
| -3 | 12  | 5  | 18.88 | 1.35 |
| -3 | 12  | 5  | 20.44 | 1.26 |
| -3 | 12  | 5  | 20.32 | 1.80 |
| -3 | -12 | -5 | 19.96 | 1.87 |
| -3 | -12 | 5  | 19.03 | 1.48 |
| -3 | -12 | 5  | 19.35 | 1.24 |
| -3 | -12 | 5  | 20.48 | 1.26 |
| 3  | -12 | -5 | 18.60 | 1.28 |
| 3  | -12 | -5 | 20.56 | 1.44 |
| -3 | -12 | 5  | 15.04 | 1.24 |
| -3 | -12 | 5  | 20.23 | 1.33 |
| -3 | -12 | 5  | 19.30 | 1.52 |

## CIF S3

|    |     |    |       |      |
|----|-----|----|-------|------|
| -4 | 12  | 5  | 0.33  | 0.66 |
| -4 | -12 | -5 | 0.31  | 0.78 |
| -4 | -12 | -5 | 0.10  | 0.68 |
| -4 | 12  | 5  | 0.11  | 0.56 |
| -4 | 12  | 5  | 0.51  | 0.98 |
| -4 | -12 | -5 | 0.23  | 0.74 |
| -4 | -12 | -5 | 0.39  | 0.46 |
| -4 | -12 | -5 | 0.07  | 0.67 |
| -4 | 12  | 5  | 0.44  | 0.27 |
| -4 | -12 | -5 | 0.39  | 0.47 |
| -4 | 12  | 5  | 0.61  | 0.69 |
| -4 | -12 | -5 | 0.60  | 0.72 |
| -4 | -12 | 5  | 0.31  | 0.44 |
| -4 | -12 | 5  | -0.10 | 0.66 |
| -4 | -12 | 5  | 0.50  | 0.48 |
| 4  | -12 | -5 | 0.79  | 0.59 |
| -4 | -12 | 5  | 0.46  | 0.82 |
| -4 | -12 | 5  | -0.21 | 0.45 |
| -5 | 12  | 5  | 1.07  | 0.43 |
| -5 | -12 | -5 | 1.00  | 0.43 |
| -5 | -12 | -5 | 2.09  | 0.59 |
| -5 | 12  | 5  | 1.02  | 0.50 |
| -5 | -12 | -5 | 1.15  | 0.62 |
| -5 | 12  | 5  | 1.52  | 0.59 |
| -5 | 12  | 5  | 0.96  | 0.59 |
| -5 | -12 | -5 | 1.80  | 0.78 |
| -5 | -12 | -5 | 0.40  | 0.54 |
| -5 | -12 | -5 | 1.01  | 0.55 |
| -5 | 12  | 5  | 2.19  | 0.75 |
| -5 | -12 | 5  | 1.26  | 0.36 |
| -5 | 12  | -5 | 1.92  | 0.42 |
| -5 | -12 | 5  | 2.13  | 0.43 |
| -5 | -12 | 5  | 0.17  | 0.54 |
| -5 | -12 | 5  | 1.71  | 0.40 |
| 5  | -12 | -5 | 1.62  | 0.56 |
| -6 | -12 | -5 | 0.82  | 0.41 |
| -6 | 12  | 5  | 0.90  | 0.44 |
| -6 | 12  | 5  | 0.51  | 0.39 |
| -6 | 12  | 5  | 1.92  | 0.50 |
| -6 | 12  | 5  | 2.05  | 0.49 |
| -6 | -12 | -5 | 0.57  | 0.33 |

## CIF S3

|    |     |    |       |      |
|----|-----|----|-------|------|
| -6 | 12  | 5  | 1.39  | 0.44 |
| -6 | -12 | -5 | 0.70  | 0.36 |
| -6 | 12  | 5  | 0.83  | 0.62 |
| -6 | -12 | 5  | 0.76  | 0.28 |
| 6  | -12 | -5 | 0.93  | 0.42 |
| -6 | 12  | -5 | 0.53  | 0.65 |
| -6 | -12 | 5  | 1.00  | 0.24 |
| 0  | -13 | 5  | 1.21  | 0.68 |
| 0  | -13 | 5  | 1.48  | 0.67 |
| 0  | -13 | 5  | 1.85  | 0.73 |
| 0  | -13 | -5 | 0.89  | 0.78 |
| 0  | -13 | 5  | -0.01 | 1.17 |
| 0  | -13 | 5  | 1.00  | 0.89 |
| 0  | -13 | 5  | 0.61  | 0.77 |
| 0  | -13 | 5  | 0.62  | 0.49 |
| -1 | -13 | -5 | 2.87  | 0.79 |
| -1 | -13 | -5 | 3.25  | 1.18 |
| 1  | -13 | 5  | 5.01  | 0.96 |
| -1 | -13 | -5 | 2.22  | 0.82 |
| 1  | -13 | 5  | 4.17  | 1.15 |
| 1  | -13 | 5  | 4.50  | 1.11 |
| 1  | -13 | 5  | 3.55  | 0.99 |
| 1  | -13 | 5  | 4.31  | 0.98 |
| 1  | -13 | 5  | 3.04  | 1.32 |
| -1 | -13 | 5  | 2.00  | 0.73 |
| 1  | -13 | -5 | 5.05  | 1.02 |
| -1 | -13 | 5  | 3.94  | 1.08 |
| -1 | -13 | 5  | 4.09  | 0.92 |
| -1 | -13 | 5  | 3.14  | 0.86 |
| -1 | -13 | 5  | 3.38  | 1.36 |
| -1 | -13 | 5  | 2.03  | 0.71 |
| -1 | -13 | 5  | 4.86  | 0.95 |
| -1 | -13 | 5  | 3.25  | 1.32 |
| -1 | -13 | 5  | 4.20  | 0.79 |
| -2 | -13 | -5 | 1.82  | 0.78 |
| -2 | 13  | 5  | 2.44  | 0.60 |
| -2 | -13 | -5 | 3.88  | 0.99 |
| 2  | -13 | 5  | -0.02 | 0.67 |
| -2 | -13 | -5 | 2.72  | 0.75 |
| 2  | -13 | 5  | 1.85  | 0.81 |
| -2 | -13 | -5 | 4.50  | 1.04 |

## CIF S3

|    |     |    |      |      |
|----|-----|----|------|------|
| -2 | -13 | -5 | 1.25 | 0.43 |
| 2  | -13 | 5  | 1.75 | 0.80 |
| 2  | -13 | 5  | 0.22 | 0.76 |
| -2 | -13 | 5  | 3.13 | 0.81 |
| 2  | -13 | -5 | 3.26 | 0.78 |
| -2 | -13 | 5  | 3.03 | 0.80 |
| -2 | -13 | 5  | 2.02 | 0.59 |
| -2 | -13 | 5  | 1.15 | 0.62 |
| 2  | -13 | -5 | 3.90 | 1.16 |
| -2 | -13 | 5  | 1.73 | 0.58 |
| 3  | -13 | 5  | 5.69 | 1.07 |
| -3 | -13 | -5 | 5.41 | 1.20 |
| -3 | -13 | -5 | 1.86 | 0.68 |
| -3 | 13  | 5  | 6.18 | 1.06 |
| 3  | -13 | 5  | 5.11 | 1.01 |
| -3 | 13  | 5  | 5.08 | 0.60 |
| -3 | -13 | -5 | 5.60 | 0.87 |
| -3 | 13  | 5  | 4.04 | 0.81 |
| -3 | -13 | -5 | 5.94 | 0.80 |
| -3 | -13 | -5 | 6.46 | 1.01 |
| -3 | -13 | 5  | 4.14 | 0.66 |
| -3 | -13 | 5  | 6.03 | 0.79 |
| -3 | -13 | 5  | 4.84 | 0.76 |
| 3  | -13 | -5 | 6.23 | 0.81 |
| -4 | 13  | 5  | 6.01 | 1.09 |
| -4 | -13 | -5 | 6.73 | 0.90 |
| -4 | -13 | -5 | 3.86 | 0.83 |
| -4 | -13 | -5 | 4.47 | 0.86 |
| -4 | -13 | -5 | 6.72 | 0.82 |
| -4 | 13  | 5  | 5.63 | 0.77 |
| -4 | -13 | -5 | 5.61 | 1.17 |
| -4 | 13  | 5  | 5.36 | 0.83 |
| 4  | -13 | -5 | 6.04 | 0.83 |
| -4 | -13 | 5  | 5.60 | 0.71 |
| -4 | -13 | 5  | 5.58 | 0.58 |
| -4 | -13 | 5  | 5.11 | 0.70 |
| -4 | -13 | 5  | 6.30 | 0.73 |
| -5 | -13 | -5 | 6.80 | 0.73 |
| -5 | 13  | 5  | 5.17 | 0.80 |
| -5 | 13  | 5  | 6.84 | 0.60 |
| -5 | -13 | -5 | 5.55 | 0.65 |

## CIF S3

|    |     |    |       |      |
|----|-----|----|-------|------|
| -5 | -13 | -5 | 7.61  | 0.98 |
| -5 | 13  | 5  | 6.45  | 0.76 |
| -5 | 13  | 5  | 6.40  | 0.64 |
| -5 | -13 | -5 | 4.98  | 0.73 |
| -5 | -13 | 5  | 7.21  | 0.58 |
| -5 | 13  | -5 | 6.68  | 0.53 |
| -5 | -13 | 5  | 7.64  | 0.54 |
| 0  | -14 | 5  | 0.45  | 0.63 |
| 0  | -14 | 5  | 0.25  | 0.55 |
| 0  | -14 | 5  | 0.26  | 0.40 |
| 0  | -14 | -5 | 1.25  | 0.62 |
| 0  | -14 | 5  | 0.19  | 0.70 |
| 0  | -14 | -5 | -1.17 | 0.77 |
| 0  | -14 | 5  | 0.35  | 0.60 |
| 0  | -14 | 5  | 0.72  | 0.48 |
| 1  | -14 | 5  | 0.40  | 0.53 |
| -1 | -14 | -5 | -0.46 | 0.73 |
| -1 | -14 | -5 | -0.03 | 1.04 |
| -1 | -14 | -5 | -0.08 | 0.56 |
| 1  | -14 | 5  | 0.33  | 0.59 |
| 1  | -14 | 5  | 0.39  | 0.66 |
| 1  | -14 | 5  | -0.14 | 0.64 |
| -1 | -14 | 5  | 0.25  | 0.51 |
| -1 | -14 | 5  | -0.20 | 0.56 |
| -1 | -14 | 5  | 0.12  | 0.57 |
| 1  | -14 | -5 | -0.66 | 0.83 |
| -1 | -14 | 5  | 0.30  | 0.43 |
| -1 | -14 | 5  | 0.01  | 0.64 |
| -1 | -14 | 5  | -0.05 | 0.50 |
| 2  | -14 | 5  | 2.19  | 0.66 |
| -2 | -14 | -5 | 1.07  | 0.73 |
| 2  | -14 | 5  | 1.85  | 0.78 |
| 2  | -14 | 5  | 1.37  | 0.71 |
| -2 | -14 | -5 | 1.33  | 0.74 |
| 2  | -14 | 5  | 0.94  | 0.80 |
| -2 | 14  | 5  | 0.83  | 0.40 |
| -2 | -14 | -5 | 0.83  | 0.62 |
| -2 | -14 | -5 | 1.18  | 0.53 |
| -2 | -14 | 5  | 0.97  | 0.44 |
| -2 | -14 | 5  | 0.54  | 0.40 |
| -2 | -14 | 5  | 1.28  | 0.49 |



## CIF S3

|    |     |    |       |      |
|----|-----|----|-------|------|
| 2  | -14 | -5 | 1.16  | 0.82 |
| -2 | -14 | 5  | 0.82  | 0.49 |
| -3 | -14 | -5 | 2.85  | 1.03 |
| 3  | -14 | 5  | 2.29  | 0.64 |
| 3  | -14 | 5  | 1.81  | 0.68 |
| -3 | 14  | 5  | 1.81  | 0.68 |
| -3 | -14 | -5 | 1.68  | 0.49 |
| -3 | -14 | 5  | 2.80  | 0.52 |
| -3 | -14 | 5  | 4.57  | 0.66 |
| -3 | -14 | 5  | 2.81  | 0.76 |
| -3 | -14 | 5  | 3.25  | 1.18 |
| -4 | 14  | 5  | 3.61  | 0.51 |
| -4 | -14 | -5 | 3.82  | 1.07 |
| -4 | 14  | 5  | 2.62  | 0.70 |
| -4 | 14  | 5  | 3.83  | 0.71 |
| -4 | -14 | -5 | 3.65  | 0.68 |
| -4 | -14 | -5 | 2.96  | 0.59 |
| -4 | 14  | 5  | 1.29  | 0.37 |
| -4 | -14 | -5 | 1.67  | 0.56 |
| -4 | -14 | -5 | 2.19  | 0.64 |
| -4 | -14 | 5  | 3.18  | 0.40 |
| -4 | 14  | -5 | 2.95  | 0.42 |
| -4 | -14 | 5  | 2.55  | 0.55 |
| 0  | -15 | -5 | -0.09 | 0.58 |
| 0  | -15 | 5  | 0.17  | 0.37 |
| 0  | -15 | 5  | 0.31  | 0.50 |
| 0  | -15 | 5  | -0.42 | 0.54 |
| 0  | -15 | -5 | -0.50 | 0.62 |
| 0  | -15 | 5  | 0.25  | 0.42 |
| 1  | -15 | 5  | 1.58  | 0.56 |
| -1 | -15 | -5 | 1.75  | 0.56 |
| 1  | -15 | 5  | 0.30  | 0.39 |
| -1 | 15  | 5  | 2.72  | 0.48 |
| 1  | -15 | 5  | 1.26  | 0.51 |
| -1 | -15 | -5 | 0.75  | 0.56 |
| -1 | -15 | -5 | 2.28  | 0.77 |
| -1 | -15 | 5  | 2.69  | 0.72 |
| -1 | -15 | 5  | 2.00  | 0.51 |
| -1 | -15 | 5  | 2.56  | 0.58 |
| 1  | -15 | -5 | 1.97  | 0.57 |
| -1 | -15 | 5  | 2.60  | 0.67 |

## CIF S3

|    |     |    |        |      |
|----|-----|----|--------|------|
| -1 | -15 | 5  | 2.49   | 0.68 |
| 0  | 0   | 6  | 5.57   | 0.88 |
| 0  | 0   | 6  | 4.15   | 0.88 |
| 0  | 0   | -6 | 4.16   | 0.88 |
| 0  | 0   | -6 | 5.20   | 0.92 |
| 0  | 0   | 6  | 4.85   | 0.96 |
| 0  | 0   | -6 | 4.44   | 0.63 |
| 1  | 0   | 6  | 8.15   | 1.23 |
| 1  | 0   | -6 | 6.84   | 0.58 |
| 1  | 0   | -6 | 7.56   | 0.86 |
| -1 | 0   | 6  | 7.66   | 0.89 |
| -1 | 0   | -6 | 7.62   | 0.90 |
| 1  | 0   | -6 | 8.74   | 0.72 |
| -1 | 0   | -6 | 7.75   | 1.01 |
| 1  | 0   | 6  | 8.13   | 1.05 |
| 1  | 0   | -6 | 8.08   | 0.91 |
| -1 | 0   | -6 | 7.81   | 1.05 |
| -1 | 0   | -6 | 8.18   | 1.13 |
| 1  | 0   | -6 | 8.72   | 0.94 |
| 2  | 0   | -6 | 82.21  | 4.58 |
| 2  | 0   | -6 | 92.02  | 4.51 |
| -2 | 0   | -6 | 90.23  | 4.65 |
| 2  | 0   | -6 | 88.48  | 4.56 |
| -2 | 0   | -6 | 94.23  | 5.00 |
| 2  | 0   | -6 | 87.99  | 4.54 |
| -2 | 0   | 6  | 90.24  | 4.67 |
| 2  | 0   | -6 | 92.32  | 4.70 |
| 2  | 0   | 6  | 94.34  | 5.05 |
| -2 | 0   | 6  | 98.11  | 4.76 |
| -2 | 0   | -6 | 94.90  | 4.98 |
| 2  | 0   | 6  | 100.89 | 5.14 |
| -3 | 0   | -6 | 7.13   | 0.96 |
| -3 | 0   | 6  | 8.29   | 0.73 |
| 3  | 0   | 6  | 7.78   | 0.75 |
| 3  | 0   | 6  | 6.76   | 1.31 |
| -3 | 0   | 6  | 8.00   | 0.47 |
| -3 | 0   | -6 | 5.87   | 0.80 |
| -3 | 0   | 6  | 7.62   | 0.45 |
| 3  | 0   | -6 | 8.52   | 0.49 |
| 3  | 0   | -6 | 8.36   | 0.60 |
| -3 | 0   | -6 | 7.17   | 1.21 |

## CIF S3

|    |   |    |        |      |
|----|---|----|--------|------|
| -3 | 0 | -6 | 5.75   | 0.70 |
| 3  | 0 | -6 | 8.70   | 0.64 |
| 3  | 0 | 6  | 9.33   | 1.48 |
| 3  | 0 | -6 | 8.41   | 0.51 |
| -4 | 0 | -6 | 109.37 | 5.64 |
| 4  | 0 | 6  | 108.94 | 5.57 |
| -4 | 0 | 6  | 106.93 | 5.37 |
| 4  | 0 | 6  | 120.74 | 6.27 |
| 4  | 0 | -6 | 111.62 | 5.38 |
| -4 | 0 | 6  | 108.40 | 5.43 |
| -4 | 0 | -6 | 109.89 | 5.55 |
| -4 | 0 | 6  | 107.46 | 5.43 |
| -5 | 0 | -6 | 0.00   | 0.52 |
| -5 | 0 | -6 | -0.22  | 0.72 |
| 5  | 0 | 6  | 0.19   | 0.58 |
| 5  | 0 | -6 | 0.04   | 0.20 |
| 5  | 0 | 6  | -0.35  | 0.96 |
| -5 | 0 | -6 | 0.00   | 0.43 |
| -5 | 0 | 6  | 0.31   | 0.19 |
| 6  | 0 | 6  | 10.36  | 1.01 |
| -6 | 0 | -6 | 9.10   | 1.26 |
| -6 | 0 | -6 | 9.16   | 0.87 |
| -6 | 0 | 6  | 9.67   | 0.60 |
| 6  | 0 | -6 | 10.51  | 0.65 |
| -6 | 0 | -6 | 9.40   | 0.85 |
| -7 | 0 | -6 | 1.08   | 0.51 |
| -7 | 0 | -6 | 0.80   | 0.54 |
| 7  | 0 | 6  | 1.93   | 0.74 |
| -7 | 0 | 6  | 0.93   | 0.27 |
| -8 | 0 | 6  | 0.02   | 0.13 |
| -8 | 0 | -6 | -0.22  | 0.48 |
| -8 | 0 | -6 | 0.90   | 0.48 |
| -8 | 0 | -6 | 1.02   | 0.61 |
| -8 | 0 | -6 | 0.01   | 0.59 |
| -8 | 0 | -6 | 0.38   | 0.52 |
| -8 | 0 | -6 | -0.76  | 0.48 |
| -8 | 0 | -6 | 0.25   | 0.92 |
| -8 | 0 | 6  | 0.17   | 0.12 |
| -8 | 0 | 6  | 0.57   | 0.23 |
| -8 | 0 | -6 | 0.05   | 0.49 |
| -9 | 0 | -6 | 11.16  | 0.87 |

## CIF S3

|     |    |    |        |       |
|-----|----|----|--------|-------|
| -9  | 0  | -6 | 12.11  | 0.93  |
| -9  | 0  | -6 | 10.64  | 1.31  |
| -9  | 0  | -6 | 11.20  | 0.88  |
| -9  | 0  | -6 | 11.94  | 0.85  |
| -10 | 0  | -6 | 0.46   | 0.30  |
| -10 | 0  | -6 | 0.21   | 0.30  |
| -10 | 0  | -6 | 0.67   | 0.27  |
| 0   | -1 | -6 | -0.09  | 0.59  |
| 0   | 1  | -6 | 0.08   | 0.58  |
| 0   | -1 | -6 | 0.40   | 0.56  |
| 0   | -1 | -6 | 0.29   | 0.62  |
| 0   | -1 | 6  | -0.13  | 0.59  |
| 0   | 1  | 6  | -0.48  | 0.47  |
| 0   | 1  | -6 | 0.48   | 0.44  |
| 0   | 1  | -6 | 0.43   | 0.59  |
| 0   | 1  | -6 | -0.08  | 0.17  |
| 0   | 1  | 6  | 0.23   | 0.67  |
| 0   | 1  | 6  | 0.29   | 0.64  |
| 0   | -1 | 6  | -0.32  | 0.52  |
| 1   | 1  | -6 | 268.14 | 13.43 |
| 1   | 1  | -6 | 278.52 | 13.65 |
| -1  | -1 | -6 | 296.34 | 13.83 |
| 1   | -1 | 6  | 286.70 | 13.81 |
| 1   | 1  | -6 | 288.70 | 13.68 |
| 1   | 1  | -6 | 263.09 | 13.48 |
| -1  | 1  | 6  | 293.46 | 13.66 |
| -1  | -1 | -6 | 270.00 | 13.80 |
| -1  | -1 | -6 | 267.60 | 13.58 |
| 1   | 1  | -6 | 253.91 | 13.50 |
| 1   | -1 | 6  | 280.24 | 13.80 |
| -1  | 1  | -6 | 255.29 | 13.56 |
| 1   | 1  | 6  | 268.88 | 13.83 |
| 1   | 1  | 6  | 252.26 | 13.78 |
| 1   | -1 | -6 | 281.59 | 13.45 |
| 1   | -1 | -6 | 265.30 | 13.52 |
| 1   | -1 | -6 | 271.26 | 13.48 |
| -1  | 1  | -6 | 274.33 | 13.79 |
| 1   | -1 | -6 | 279.24 | 13.49 |
| -1  | 1  | -6 | 273.78 | 13.74 |
| 1   | -1 | -6 | 276.25 | 13.72 |
| -1  | 1  | -6 | 293.12 | 13.82 |

## CIF S3

|    |    |    |        |       |
|----|----|----|--------|-------|
| -1 | -1 | 6  | 271.01 | 13.60 |
| 1  | -1 | -6 | 314.34 | 13.74 |
| 2  | -1 | 6  | 39.17  | 2.50  |
| 2  | -1 | 6  | 37.80  | 2.50  |
| 2  | 1  | -6 | 37.90  | 1.88  |
| -2 | -1 | -6 | 38.03  | 2.09  |
| -2 | -1 | -6 | 39.03  | 2.45  |
| -2 | 1  | 6  | 38.01  | 2.02  |
| 2  | 1  | -6 | 36.09  | 1.93  |
| -2 | 1  | 6  | 36.59  | 2.13  |
| -2 | -1 | -6 | 38.78  | 2.41  |
| 2  | 1  | -6 | 36.82  | 1.95  |
| 2  | 1  | -6 | 39.03  | 2.06  |
| 2  | -1 | -6 | 38.91  | 1.95  |
| 2  | -1 | -6 | 38.73  | 2.03  |
| 2  | -1 | -6 | 35.87  | 1.92  |
| 2  | -1 | -6 | 37.01  | 2.00  |
| -2 | 1  | -6 | 38.10  | 2.45  |
| 2  | 1  | 6  | 36.10  | 2.42  |
| -2 | -1 | 6  | 37.38  | 2.04  |
| 2  | -1 | -6 | 39.76  | 2.21  |
| -2 | 1  | -6 | 35.49  | 2.07  |
| 2  | 1  | 6  | 33.17  | 2.00  |
| 2  | 1  | 6  | 35.03  | 2.46  |
| -2 | -1 | 6  | 38.15  | 2.06  |
| -2 | 1  | -6 | 38.03  | 2.45  |
| -3 | -1 | -6 | 59.59  | 3.50  |
| 3  | -1 | 6  | 55.57  | 3.04  |
| -3 | 1  | 6  | 64.05  | 2.98  |
| -3 | -1 | -6 | 58.51  | 3.13  |
| 3  | -1 | 6  | 53.66  | 3.53  |
| -3 | 1  | 6  | 54.03  | 2.87  |
| 3  | 1  | -6 | 57.94  | 2.87  |
| 3  | -1 | 6  | 57.96  | 3.52  |
| -3 | -1 | -6 | 56.81  | 3.05  |
| -3 | 1  | 6  | 57.94  | 2.87  |
| -3 | 1  | 6  | 57.07  | 3.09  |
| 3  | -1 | -6 | 60.02  | 2.99  |
| 3  | 1  | 6  | 56.93  | 3.52  |
| 3  | -1 | -6 | 58.52  | 2.91  |
| 3  | 1  | 6  | 59.50  | 3.64  |

## CIF S3

|    |    |    |       |      |
|----|----|----|-------|------|
| -3 | 1  | -6 | 56.37 | 2.99 |
| -3 | 1  | -6 | 61.19 | 3.67 |
| -3 | 1  | -6 | 62.90 | 3.14 |
| 3  | -1 | -6 | 59.41 | 2.94 |
| 3  | -1 | -6 | 60.38 | 3.03 |
| -3 | 1  | -6 | 53.68 | 3.02 |
| -3 | -1 | 6  | 61.65 | 2.95 |
| -3 | 1  | -6 | 53.29 | 3.44 |
| -3 | -1 | 6  | 60.39 | 2.85 |
| -3 | -1 | 6  | 59.79 | 2.96 |
| 3  | 1  | 6  | 58.89 | 3.06 |
| -4 | 1  | 6  | 80.03 | 3.96 |
| -4 | -1 | -6 | 84.15 | 4.13 |
| -4 | 1  | 6  | 80.40 | 4.01 |
| -4 | 1  | 6  | 72.40 | 4.12 |
| -4 | -1 | -6 | 83.28 | 4.25 |
| 4  | -1 | 6  | 81.86 | 4.16 |
| 4  | -1 | -6 | 89.43 | 4.22 |
| -4 | -1 | 6  | 79.51 | 3.92 |
| -4 | 1  | -6 | 80.00 | 4.13 |
| 4  | 1  | 6  | 82.64 | 4.16 |
| 4  | 1  | 6  | 69.54 | 4.72 |
| 4  | -1 | -6 | 83.75 | 4.00 |
| -4 | 1  | -6 | 78.41 | 4.24 |
| 4  | -1 | -6 | 79.63 | 4.11 |
| -4 | -1 | 6  | 82.36 | 3.92 |
| 4  | -1 | -6 | 83.37 | 4.02 |
| -4 | 1  | -6 | 79.86 | 4.08 |
| -5 | 1  | 6  | 1.75  | 0.44 |
| -5 | -1 | -6 | 2.23  | 0.51 |
| -5 | -1 | -6 | 2.03  | 0.76 |
| 5  | -1 | 6  | -0.86 | 1.31 |
| 5  | -1 | 6  | 1.82  | 0.64 |
| -5 | -1 | -6 | 1.78  | 0.58 |
| -5 | -1 | -6 | 1.57  | 0.80 |
| -5 | 1  | 6  | 2.39  | 0.36 |
| 5  | -1 | -6 | 1.04  | 0.81 |
| -5 | 1  | -6 | 1.33  | 0.84 |
| 5  | 1  | 6  | 1.71  | 0.57 |
| 5  | -1 | -6 | 1.91  | 0.43 |
| 5  | -1 | -6 | 1.74  | 0.42 |

## CIF S3

|    |    |    |       |      |
|----|----|----|-------|------|
| -5 | -1 | 6  | 1.60  | 0.19 |
| -5 | 1  | -6 | 1.58  | 0.60 |
| -5 | 1  | -6 | 1.80  | 0.50 |
| 5  | 1  | 6  | 1.60  | 1.06 |
| 6  | -1 | 6  | 13.19 | 1.15 |
| -6 | -1 | -6 | 12.28 | 0.93 |
| -6 | 1  | 6  | 11.14 | 0.82 |
| -6 | -1 | -6 | 12.01 | 0.94 |
| -6 | 1  | 6  | 13.55 | 0.78 |
| 6  | 1  | -6 | 13.39 | 0.71 |
| 6  | -1 | -6 | 13.35 | 0.85 |
| -6 | 1  | -6 | 10.70 | 1.33 |
| 6  | -1 | -6 | 13.08 | 0.88 |
| -6 | -1 | 6  | 13.49 | 0.69 |
| 6  | 1  | 6  | 12.72 | 1.13 |
| -6 | 1  | -6 | 12.34 | 0.95 |
| -6 | 1  | -6 | 12.37 | 0.93 |
| -6 | 1  | -6 | 13.47 | 1.25 |
| -7 | -1 | -6 | 0.81  | 0.53 |
| -7 | -1 | -6 | 1.74  | 0.59 |
| -7 | -1 | -6 | 0.96  | 0.52 |
| -7 | 1  | 6  | 1.93  | 0.43 |
| 7  | -1 | 6  | 1.43  | 0.70 |
| -7 | -1 | 6  | 1.28  | 0.28 |
| 7  | 1  | 6  | 1.40  | 0.69 |
| -7 | 1  | -6 | 1.73  | 0.53 |
| -7 | 1  | -6 | 0.39  | 0.61 |
| -8 | -1 | -6 | 0.76  | 0.58 |
| -8 | -1 | -6 | 0.24  | 0.46 |
| -8 | 1  | 6  | 0.61  | 0.22 |
| -8 | 1  | 6  | 0.81  | 0.26 |
| -8 | 1  | 6  | 0.63  | 0.22 |
| -8 | -1 | -6 | 0.92  | 0.56 |
| -8 | -1 | -6 | 0.48  | 0.48 |
| -8 | -1 | -6 | 0.32  | 0.49 |
| -8 | -1 | -6 | 0.21  | 0.47 |
| -8 | -1 | -6 | -0.74 | 0.97 |
| -8 | -1 | -6 | 0.54  | 0.47 |
| -8 | 1  | 6  | 0.46  | 0.29 |
| -8 | 1  | -6 | -0.92 | 0.58 |
| -8 | 1  | -6 | 0.44  | 0.49 |

## CIF S3

|     |    |    |       |      |
|-----|----|----|-------|------|
| -8  | 1  | -6 | 0.23  | 0.48 |
| -8  | 1  | -6 | 0.86  | 0.49 |
| -8  | 1  | -6 | -0.80 | 0.59 |
| -8  | 1  | -6 | 0.71  | 0.90 |
| -8  | 1  | -6 | 0.50  | 0.46 |
| -8  | 1  | -6 | 1.48  | 0.46 |
| -9  | -1 | -6 | 1.43  | 0.39 |
| -9  | -1 | -6 | 1.19  | 0.50 |
| -9  | -1 | -6 | 0.47  | 0.43 |
| -9  | -1 | -6 | 1.84  | 0.85 |
| -9  | -1 | -6 | 0.24  | 0.43 |
| -9  | 1  | -6 | 0.27  | 0.47 |
| -9  | 1  | -6 | -0.37 | 0.81 |
| -9  | 1  | -6 | 0.55  | 0.46 |
| -9  | 1  | -6 | 1.35  | 0.43 |
| -9  | 1  | -6 | 0.71  | 0.64 |
| -9  | 1  | -6 | 0.96  | 0.46 |
| -9  | 1  | -6 | 0.57  | 0.40 |
| -10 | -1 | -6 | 1.89  | 0.44 |
| -10 | -1 | -6 | 2.52  | 0.48 |
| -10 | 1  | -6 | 1.91  | 0.50 |
| -10 | 1  | -6 | 1.57  | 0.35 |
| -10 | 1  | -6 | 2.56  | 0.43 |
| -10 | 1  | -6 | 1.89  | 0.37 |
| 0   | -2 | -6 | 46.80 | 2.29 |
| 0   | 2  | -6 | 41.28 | 2.43 |
| 0   | 2  | -6 | 41.93 | 2.27 |
| 0   | -2 | -6 | 40.90 | 2.62 |
| 0   | -2 | 6  | 41.69 | 2.43 |
| 0   | 2  | 6  | 37.51 | 2.65 |
| 0   | 2  | -6 | 41.16 | 2.44 |
| 0   | -2 | -6 | 44.05 | 2.31 |
| 0   | -2 | -6 | 42.47 | 2.56 |
| 0   | -2 | 6  | 41.76 | 2.43 |
| 0   | 2  | -6 | 39.67 | 2.21 |
| 0   | 2  | 6  | 39.85 | 2.52 |
| 0   | 2  | -6 | 44.22 | 2.56 |
| 1   | -2 | 6  | 53.56 | 3.22 |
| -1  | 2  | 6  | 54.32 | 3.14 |
| -1  | -2 | -6 | 51.08 | 3.23 |
| 1   | 2  | -6 | 53.97 | 3.05 |



## CIF S3

|    |    |    |       |      |
|----|----|----|-------|------|
| -1 | 2  | 6  | 58.20 | 3.08 |
| -1 | -2 | -6 | 53.51 | 3.24 |
| 1  | 2  | -6 | 55.12 | 2.82 |
| 1  | -2 | 6  | 54.37 | 3.21 |
| -1 | 2  | 6  | 47.32 | 3.64 |
| 1  | 2  | -6 | 55.85 | 2.86 |
| 1  | 2  | -6 | 61.73 | 3.02 |
| 1  | 2  | -6 | 55.68 | 3.02 |
| -1 | -2 | -6 | 56.96 | 3.00 |
| -1 | 2  | -6 | 53.85 | 3.14 |
| 1  | -2 | -6 | 58.40 | 3.19 |
| -1 | 2  | -6 | 52.62 | 2.92 |
| -1 | 2  | -6 | 54.29 | 2.89 |
| -1 | -2 | 6  | 56.22 | 3.01 |
| -1 | 2  | -6 | 52.48 | 2.88 |
| 1  | -2 | -6 | 53.44 | 2.86 |
| 1  | -2 | -6 | 59.18 | 2.95 |
| 1  | -2 | -6 | 57.00 | 2.90 |
| -1 | 2  | -6 | 53.92 | 3.14 |
| -1 | 2  | -6 | 62.68 | 3.29 |
| 1  | 2  | 6  | 55.21 | 3.38 |
| 1  | 2  | 6  | 55.96 | 3.25 |
| 2  | -2 | 6  | 10.26 | 1.46 |
| -2 | 2  | 6  | 10.62 | 0.91 |
| -2 | -2 | -6 | 10.16 | 1.28 |
| 2  | 2  | -6 | 10.79 | 0.83 |
| 2  | 2  | -6 | 10.26 | 0.69 |
| 2  | -2 | 6  | 9.94  | 1.38 |
| -2 | 2  | 6  | 11.26 | 1.05 |
| -2 | -2 | -6 | 10.60 | 1.25 |
| 2  | 2  | -6 | 9.50  | 0.73 |
| -2 | -2 | -6 | 10.44 | 0.98 |
| 2  | 2  | 6  | 11.66 | 1.38 |
| 2  | -2 | -6 | 10.46 | 0.76 |
| 2  | -2 | -6 | 11.76 | 0.98 |
| 2  | 2  | 6  | 10.14 | 1.49 |
| -2 | 2  | -6 | 12.05 | 1.36 |
| -2 | -2 | 6  | 10.01 | 0.63 |
| 2  | -2 | -6 | 11.17 | 1.16 |
| -2 | 2  | -6 | 10.39 | 1.17 |
| -2 | -2 | 6  | 11.36 | 0.93 |

## CIF S3

|    |    |    |       |      |
|----|----|----|-------|------|
| 2  | 2  | 6  | 10.16 | 0.80 |
| -2 | 2  | -6 | 10.90 | 0.95 |
| -2 | 2  | -6 | 11.85 | 0.97 |
| 2  | -2 | -6 | 9.41  | 0.90 |
| -2 | -2 | 6  | 10.78 | 0.88 |
| 2  | -2 | -6 | 11.37 | 0.79 |
| 3  | -2 | 6  | 68.48 | 3.85 |
| 3  | -2 | 6  | 63.95 | 4.39 |
| -3 | 2  | 6  | 77.97 | 3.88 |
| -3 | -2 | -6 | 78.05 | 4.31 |
| 3  | -2 | 6  | 84.13 | 4.52 |
| -3 | -2 | -6 | 72.17 | 3.89 |
| -3 | 2  | 6  | 80.51 | 4.03 |
| 3  | -2 | 6  | 77.87 | 3.93 |
| -3 | 2  | 6  | 77.99 | 3.76 |
| 3  | 2  | 6  | 73.93 | 4.39 |
| -3 | 2  | -6 | 64.69 | 4.29 |
| -3 | -2 | 6  | 75.64 | 3.72 |
| 3  | -2 | -6 | 79.94 | 3.89 |
| 3  | 2  | 6  | 85.41 | 4.60 |
| -3 | 2  | -6 | 74.14 | 4.32 |
| -3 | 2  | -6 | 72.28 | 3.92 |
| 3  | -2 | -6 | 80.50 | 3.82 |
| -3 | 2  | -6 | 81.86 | 3.98 |
| 3  | -2 | -6 | 78.46 | 3.84 |
| -3 | 2  | -6 | 73.62 | 3.85 |
| 3  | 2  | 6  | 76.07 | 3.90 |
| 3  | -2 | -6 | 78.14 | 3.96 |
| -3 | -2 | 6  | 76.87 | 3.82 |
| -3 | -2 | 6  | 80.16 | 3.81 |
| -4 | -2 | -6 | 61.08 | 3.05 |
| -4 | 2  | 6  | 57.24 | 2.87 |
| 4  | -2 | 6  | 57.75 | 3.07 |
| -4 | 2  | 6  | 61.55 | 2.97 |
| 4  | -2 | 6  | 56.87 | 3.75 |
| -4 | 2  | 6  | 49.22 | 3.11 |
| -4 | 2  | 6  | 52.19 | 2.87 |
| -4 | 2  | 6  | 51.92 | 2.88 |
| -4 | 2  | -6 | 58.11 | 2.99 |
| 4  | 2  | 6  | 64.14 | 3.83 |
| 4  | 2  | 6  | 61.14 | 3.06 |

## CIF S3

|    |    |    |       |      |
|----|----|----|-------|------|
| -4 | 2  | -6 | 63.94 | 3.18 |
| 4  | -2 | -6 | 56.74 | 2.96 |
| 4  | -2 | -6 | 54.43 | 3.09 |
| -4 | -2 | 6  | 55.58 | 2.80 |
| 4  | -2 | -6 | 58.67 | 2.94 |
| -4 | 2  | -6 | 57.54 | 3.04 |
| 4  | -2 | -6 | 61.18 | 3.03 |
| -5 | 2  | 6  | 1.94  | 0.48 |
| 5  | -2 | 6  | 2.14  | 0.75 |
| -5 | 2  | 6  | 1.82  | 0.41 |
| -5 | -2 | -6 | 1.78  | 0.59 |
| -5 | 2  | 6  | 2.02  | 0.53 |
| -5 | -2 | -6 | 3.61  | 0.85 |
| -5 | -2 | -6 | 1.73  | 0.48 |
| -5 | -2 | -6 | 1.51  | 0.58 |
| 5  | -2 | -6 | 1.74  | 0.71 |
| -5 | 2  | -6 | 2.34  | 0.79 |
| 5  | -2 | -6 | 1.65  | 0.42 |
| -5 | 2  | -6 | 1.61  | 0.89 |
| 5  | 2  | 6  | 1.18  | 0.59 |
| -5 | 2  | -6 | 1.57  | 0.53 |
| 5  | -2 | -6 | 1.24  | 0.65 |
| 5  | -2 | -6 | 1.31  | 0.52 |
| -6 | 2  | 6  | 21.71 | 1.26 |
| -6 | 2  | 6  | 23.64 | 1.23 |
| 6  | -2 | 6  | 22.68 | 1.57 |
| -6 | -2 | -6 | 22.05 | 1.36 |
| -6 | -2 | -6 | 22.94 | 1.35 |
| -6 | -2 | -6 | 20.83 | 1.34 |
| -6 | -2 | -6 | 21.57 | 1.49 |
| -6 | 2  | -6 | 21.79 | 1.33 |
| -6 | 2  | -6 | 20.70 | 1.40 |
| 6  | -2 | -6 | 20.79 | 1.34 |
| 6  | -2 | -6 | 21.57 | 1.33 |
| -6 | 2  | -6 | 24.25 | 1.49 |
| 6  | -2 | -6 | 21.19 | 1.47 |
| 6  | 2  | 6  | 21.16 | 1.51 |
| -6 | 2  | -6 | 25.88 | 1.86 |
| -7 | 2  | 6  | 12.40 | 0.91 |
| -7 | 2  | 6  | 12.79 | 0.89 |
| -7 | -2 | -6 | 14.47 | 1.06 |

## CIF S3

|     |    |    |       |      |
|-----|----|----|-------|------|
| -7  | -2 | -6 | 15.32 | 1.03 |
| -7  | -2 | -6 | 15.54 | 1.01 |
| 7   | -2 | 6  | 14.47 | 1.29 |
| -7  | 2  | -6 | 14.77 | 1.17 |
| -7  | 2  | -6 | 13.67 | 1.08 |
| 7   | 2  | 6  | 13.42 | 1.22 |
| -8  | 2  | 6  | 4.41  | 0.48 |
| -8  | -2 | -6 | 4.03  | 0.73 |
| -8  | -2 | -6 | 4.73  | 0.72 |
| -8  | -2 | -6 | 3.80  | 0.74 |
| -8  | -2 | -6 | 3.49  | 1.09 |
| -8  | 2  | 6  | 4.31  | 0.50 |
| -8  | -2 | -6 | 4.25  | 0.75 |
| -8  | -2 | -6 | 3.15  | 0.99 |
| -8  | -2 | -6 | 3.98  | 0.74 |
| -8  | -2 | -6 | 4.38  | 0.69 |
| -8  | 2  | -6 | 4.56  | 0.87 |
| -8  | 2  | -6 | 6.63  | 1.33 |
| -8  | 2  | -6 | 4.54  | 0.80 |
| -8  | 2  | -6 | 3.61  | 0.80 |
| -8  | 2  | -6 | 4.64  | 0.79 |
| -8  | 2  | -6 | 4.09  | 0.86 |
| -8  | 2  | -6 | 3.49  | 0.65 |
| -9  | -2 | -6 | 11.06 | 0.82 |
| -9  | -2 | -6 | 9.49  | 0.76 |
| -9  | 2  | 6  | 9.58  | 0.51 |
| -9  | 2  | 6  | 8.63  | 0.53 |
| -9  | -2 | -6 | 8.08  | 1.27 |
| -9  | 2  | -6 | 8.53  | 0.77 |
| -9  | 2  | -6 | 9.75  | 0.92 |
| -9  | 2  | -6 | 8.54  | 0.89 |
| -9  | 2  | -6 | 8.31  | 0.89 |
| -9  | 2  | -6 | 8.66  | 0.81 |
| -9  | 2  | -6 | 7.25  | 1.18 |
| -9  | 2  | -6 | 9.02  | 0.82 |
| -10 | -2 | -6 | 5.08  | 0.45 |
| -10 | -2 | -6 | 5.04  | 0.53 |
| -10 | 2  | -6 | 3.65  | 0.61 |
| -10 | 2  | -6 | 5.65  | 0.58 |
| -10 | 2  | -6 | 5.12  | 0.49 |
| -10 | 2  | -6 | 4.89  | 0.56 |

## CIF S3

|    |    |    |       |      |
|----|----|----|-------|------|
| 0  | 3  | -6 | 69.90 | 3.72 |
| 0  | 3  | -6 | 74.95 | 3.98 |
| 0  | 3  | 6  | 68.92 | 4.08 |
| 0  | -3 | -6 | 75.03 | 4.14 |
| 0  | 3  | 6  | 64.11 | 4.15 |
| 0  | -3 | -6 | 72.64 | 3.78 |
| 0  | 3  | -6 | 73.77 | 4.07 |
| 0  | -3 | -6 | 75.68 | 3.89 |
| 0  | -3 | 6  | 75.86 | 3.96 |
| 0  | 3  | -6 | 74.95 | 3.72 |
| 0  | 3  | -6 | 72.74 | 3.77 |
| 0  | -3 | -6 | 72.87 | 3.99 |
| 0  | 3  | -6 | 80.59 | 4.01 |
| 1  | 3  | -6 | 15.81 | 1.30 |
| 1  | 3  | -6 | 16.57 | 0.93 |
| 1  | 3  | -6 | 15.14 | 1.19 |
| -1 | -3 | -6 | 14.82 | 1.51 |
| -1 | -3 | -6 | 14.21 | 1.15 |
| -1 | 3  | 6  | 15.23 | 1.48 |
| 1  | 3  | -6 | 15.54 | 1.21 |
| 1  | 3  | -6 | 15.75 | 1.06 |
| 1  | -3 | 6  | 15.56 | 1.47 |
| -1 | 3  | 6  | 15.05 | 1.41 |
| -1 | 3  | 6  | 14.77 | 1.55 |
| 1  | 3  | -6 | 15.75 | 0.98 |
| -1 | -3 | -6 | 14.87 | 1.47 |
| -1 | -3 | -6 | 13.64 | 1.50 |
| 1  | 3  | 6  | 17.11 | 1.72 |
| -1 | -3 | 6  | 15.86 | 1.27 |
| -1 | 3  | -6 | 14.58 | 1.09 |
| -1 | -3 | 6  | 15.52 | 1.54 |
| -1 | 3  | -6 | 15.23 | 1.08 |
| 1  | -3 | -6 | 13.30 | 1.08 |
| -1 | 3  | -6 | 16.85 | 1.41 |
| 1  | -3 | -6 | 13.94 | 1.12 |
| -1 | 3  | -6 | 15.99 | 1.51 |
| -1 | 3  | -6 | 15.53 | 1.40 |
| 1  | 3  | 6  | 15.69 | 1.46 |
| 1  | -3 | -6 | 15.17 | 1.54 |
| -1 | 3  | -6 | 14.34 | 1.12 |
| 1  | -3 | -6 | 15.00 | 1.27 |

## CIF S3

|    |    |    |       |      |
|----|----|----|-------|------|
| -2 | 3  | 6  | 29.30 | 1.80 |
| 2  | -3 | 6  | 29.52 | 2.27 |
| 2  | 3  | -6 | 30.74 | 1.64 |
| -2 | -3 | -6 | 31.85 | 2.16 |
| 2  | -3 | 6  | 28.91 | 2.23 |
| 2  | -3 | 6  | 25.68 | 1.89 |
| 2  | 3  | -6 | 29.74 | 1.62 |
| -2 | 3  | 6  | 27.99 | 1.94 |
| -2 | 3  | 6  | 30.17 | 1.96 |
| -2 | -3 | -6 | 32.53 | 2.26 |
| 2  | 3  | -6 | 30.90 | 1.81 |
| 2  | 3  | -6 | 30.53 | 1.76 |
| -2 | -3 | 6  | 32.20 | 1.81 |
| 2  | -3 | -6 | 26.69 | 1.86 |
| -2 | 3  | -6 | 29.77 | 1.80 |
| 2  | 3  | 6  | 29.05 | 2.18 |
| 2  | 3  | 6  | 29.96 | 1.68 |
| 2  | -3 | -6 | 29.50 | 2.13 |
| 2  | 3  | 6  | 30.89 | 2.38 |
| -2 | 3  | -6 | 28.81 | 2.18 |
| -2 | 3  | -6 | 28.30 | 2.06 |
| 2  | -3 | -6 | 33.01 | 1.78 |
| -2 | -3 | 6  | 29.19 | 1.52 |
| -2 | -3 | 6  | 30.19 | 1.54 |
| -2 | 3  | -6 | 29.93 | 1.79 |
| 2  | -3 | -6 | 32.62 | 1.71 |
| -2 | -3 | 6  | 30.14 | 1.52 |
| 3  | -3 | 6  | 3.05  | 1.35 |
| -3 | -3 | -6 | 5.74  | 1.16 |
| -3 | -3 | -6 | 4.79  | 0.76 |
| -3 | 3  | 6  | 4.81  | 0.84 |
| -3 | 3  | 6  | 5.03  | 0.52 |
| 3  | 3  | -6 | 5.34  | 0.50 |
| -3 | -3 | -6 | 5.15  | 0.63 |
| 3  | -3 | 6  | 4.43  | 0.74 |
| -3 | 3  | 6  | 5.22  | 0.96 |
| 3  | -3 | 6  | 7.11  | 1.28 |
| 3  | -3 | 6  | 4.88  | 0.72 |
| 3  | 3  | -6 | 5.12  | 0.62 |
| 3  | 3  | 6  | 5.28  | 1.47 |
| -3 | 3  | -6 | 4.18  | 1.19 |

## CIF S3

|    |    |    |       |      |
|----|----|----|-------|------|
| -3 | 3  | -6 | 5.45  | 0.88 |
| 3  | -3 | -6 | 6.95  | 0.89 |
| 3  | 3  | 6  | 5.97  | 1.21 |
| 3  | -3 | -6 | 5.72  | 0.68 |
| -3 | 3  | -6 | 4.41  | 0.67 |
| -3 | 3  | -6 | 6.88  | 1.14 |
| -3 | -3 | 6  | 5.64  | 0.36 |
| 3  | 3  | 6  | 4.42  | 0.66 |
| -3 | -3 | 6  | 5.30  | 0.37 |
| -3 | 3  | -6 | 4.46  | 0.73 |
| 3  | -3 | -6 | 5.01  | 0.99 |
| -3 | -3 | 6  | 5.26  | 0.37 |
| -3 | -3 | 6  | 6.56  | 0.58 |
| -3 | -3 | 6  | 6.16  | 0.61 |
| -4 | 3  | 6  | 17.26 | 1.16 |
| -4 | -3 | -6 | 14.10 | 1.00 |
| -4 | 3  | 6  | 7.22  | 1.64 |
| 4  | -3 | 6  | 11.37 | 1.84 |
| -4 | -3 | -6 | 14.32 | 0.98 |
| -4 | -3 | -6 | 15.81 | 1.15 |
| 4  | -3 | 6  | 15.94 | 1.14 |
| -4 | 3  | 6  | 16.67 | 0.89 |
| -4 | 3  | 6  | 14.27 | 0.96 |
| -4 | 3  | -6 | 13.95 | 1.11 |
| 4  | 3  | 6  | 16.08 | 1.13 |
| 4  | -3 | -6 | 15.40 | 1.03 |
| 4  | -3 | -6 | 14.63 | 1.30 |
| -4 | 3  | -6 | 13.72 | 1.24 |
| -4 | -3 | 6  | 15.35 | 0.77 |
| -4 | 3  | -6 | 14.49 | 1.03 |
| 4  | -3 | -6 | 16.04 | 1.22 |
| -5 | -3 | -6 | -0.19 | 0.56 |
| 5  | -3 | 6  | -0.24 | 0.69 |
| -5 | -3 | -6 | -0.08 | 0.47 |
| -5 | 3  | 6  | -0.03 | 0.34 |
| -5 | 3  | 6  | -0.37 | 0.51 |
| -5 | -3 | -6 | -0.67 | 0.49 |
| -5 | -3 | -6 | 0.59  | 0.74 |
| -5 | 3  | 6  | 0.25  | 0.43 |
| 5  | -3 | -6 | 0.36  | 0.53 |
| 5  | 3  | 6  | -0.23 | 0.57 |

## CIF S3

|    |    |    |       |      |
|----|----|----|-------|------|
| -5 | 3  | -6 | -0.45 | 0.56 |
| -5 | -3 | 6  | 0.13  | 0.13 |
| -5 | -3 | 6  | 0.18  | 0.12 |
| 5  | -3 | -6 | 0.83  | 0.80 |
| 5  | -3 | -6 | 1.71  | 0.73 |
| -5 | 3  | -6 | 0.09  | 0.75 |
| -5 | 3  | -6 | -0.14 | 0.56 |
| -6 | -3 | -6 | 10.35 | 0.87 |
| -6 | 3  | 6  | 8.96  | 0.69 |
| -6 | -3 | -6 | 11.19 | 1.13 |
| 6  | -3 | 6  | 9.52  | 1.13 |
| -6 | -3 | -6 | 10.85 | 0.89 |
| -6 | 3  | 6  | 11.05 | 0.85 |
| -6 | -3 | -6 | 10.44 | 0.90 |
| -6 | -3 | -6 | 10.08 | 1.24 |
| -6 | 3  | 6  | 10.62 | 0.77 |
| -6 | -3 | 6  | 11.95 | 1.07 |
| 6  | 3  | 6  | 10.44 | 1.06 |
| -6 | 3  | -6 | 9.41  | 1.07 |
| 6  | -3 | -6 | 9.87  | 0.89 |
| -6 | 3  | -6 | 8.56  | 0.95 |
| -6 | 3  | -6 | 8.82  | 1.34 |
| -6 | 3  | -6 | 10.77 | 1.00 |
| 6  | -3 | -6 | 8.07  | 1.08 |
| 6  | -3 | -6 | 10.75 | 1.03 |
| -7 | -3 | -6 | 11.14 | 0.94 |
| -7 | -3 | -6 | 11.94 | 0.93 |
| -7 | -3 | -6 | 11.50 | 0.91 |
| 7  | -3 | 6  | 10.96 | 1.23 |
| -7 | 3  | 6  | 10.70 | 0.83 |
| -7 | -3 | -6 | 12.50 | 1.01 |
| -7 | -3 | -6 | 12.29 | 1.32 |
| -7 | 3  | 6  | 11.66 | 0.92 |
| -7 | -3 | 6  | 12.41 | 1.24 |
| -7 | 3  | -6 | 11.29 | 1.03 |
| -7 | 3  | -6 | 13.04 | 1.03 |
| 7  | 3  | 6  | 14.54 | 1.50 |
| -8 | -3 | -6 | 0.56  | 0.50 |
| -8 | -3 | -6 | 0.81  | 0.53 |
| -8 | 3  | 6  | 1.27  | 0.23 |
| -8 | 3  | 6  | 1.49  | 0.51 |



## CIF S3

|     |    |    |        |      |
|-----|----|----|--------|------|
| -8  | -3 | -6 | 1.83   | 1.08 |
| -8  | -3 | -6 | 0.92   | 0.47 |
| -8  | -3 | -6 | 1.28   | 0.45 |
| -8  | 3  | 6  | 0.76   | 0.34 |
| -8  | -3 | -6 | 0.81   | 0.45 |
| -8  | -3 | -6 | 1.71   | 0.95 |
| -8  | 3  | -6 | 1.23   | 0.56 |
| -8  | 3  | -6 | 1.58   | 1.12 |
| -8  | 3  | -6 | 1.62   | 0.57 |
| -8  | 3  | -6 | 0.92   | 0.51 |
| -8  | 3  | -6 | 0.94   | 0.58 |
| -8  | 3  | -6 | 0.76   | 0.63 |
| -8  | 3  | -6 | 1.13   | 0.53 |
| -9  | -3 | -6 | 2.77   | 0.58 |
| -9  | -3 | -6 | 1.59   | 0.80 |
| -9  | -3 | -6 | 3.87   | 0.66 |
| -9  | 3  | 6  | 3.17   | 0.39 |
| -9  | 3  | 6  | 3.53   | 0.41 |
| -9  | 3  | 6  | 3.29   | 0.68 |
| -9  | -3 | -6 | 3.83   | 0.59 |
| -9  | 3  | 6  | 3.33   | 0.37 |
| -9  | 3  | -6 | 3.77   | 0.68 |
| -9  | 3  | -6 | 4.13   | 0.76 |
| -9  | 3  | -6 | 3.84   | 0.75 |
| -9  | 3  | -6 | 4.09   | 0.65 |
| -9  | 3  | -6 | 3.68   | 0.62 |
| -10 | -3 | -6 | 2.90   | 0.42 |
| -10 | 3  | -6 | 1.29   | 0.32 |
| -10 | 3  | -6 | 1.39   | 0.33 |
| -10 | 3  | -6 | 2.38   | 0.40 |
| -10 | 3  | -6 | 2.91   | 0.49 |
| 0   | 4  | -6 | 169.26 | 8.76 |
| 0   | -4 | -6 | 172.57 | 8.57 |
| 0   | 4  | 6  | 165.24 | 8.83 |
| 0   | -4 | 6  | 158.23 | 9.16 |
| 0   | 4  | -6 | 191.56 | 8.71 |
| 0   | -4 | -6 | 182.03 | 8.48 |
| 0   | 4  | -6 | 176.21 | 8.43 |
| 0   | -4 | -6 | 168.18 | 8.70 |
| 0   | 4  | -6 | 166.58 | 8.48 |
| 0   | 4  | 6  | 169.86 | 8.94 |

## CIF S3

|    |    |    |        |      |
|----|----|----|--------|------|
| 0  | -4 | -6 | 162.73 | 8.84 |
| 0  | 4  | 6  | 153.94 | 8.37 |
| 0  | 4  | -6 | 167.85 | 8.41 |
| 0  | 4  | -6 | 171.86 | 8.73 |
| 1  | 4  | -6 | 115.02 | 5.52 |
| -1 | 4  | 6  | 111.70 | 5.99 |
| 1  | 4  | -6 | 106.81 | 5.77 |
| -1 | 4  | 6  | 104.99 | 5.44 |
| 1  | 4  | -6 | 115.86 | 5.86 |
| 1  | -4 | 6  | 101.93 | 5.46 |
| 1  | -4 | 6  | 110.67 | 5.91 |
| 1  | 4  | -6 | 114.08 | 5.74 |
| -1 | -4 | -6 | 111.38 | 5.91 |
| -1 | -4 | -6 | 102.62 | 5.94 |
| 1  | 4  | -6 | 114.70 | 5.58 |
| 1  | -4 | -6 | 106.73 | 5.98 |
| -1 | 4  | -6 | 113.13 | 5.56 |
| 1  | 4  | 6  | 105.90 | 5.52 |
| -1 | 4  | -6 | 100.72 | 5.82 |
| -1 | 4  | -6 | 107.48 | 5.63 |
| 1  | 4  | 6  | 120.14 | 6.16 |
| 1  | -4 | -6 | 111.85 | 5.71 |
| -1 | -4 | 6  | 114.29 | 5.89 |
| -1 | -4 | 6  | 111.20 | 5.74 |
| -1 | 4  | -6 | 115.26 | 5.98 |
| -1 | 4  | -6 | 109.79 | 5.57 |
| 1  | -4 | -6 | 116.35 | 5.63 |
| 1  | 4  | 6  | 114.55 | 6.06 |
| -1 | -4 | 6  | 101.75 | 5.42 |
| -1 | 4  | -6 | 110.39 | 5.92 |
| -2 | -4 | -6 | 13.59  | 1.60 |
| 2  | 4  | -6 | 13.49  | 0.97 |
| -2 | -4 | -6 | 11.71  | 1.06 |
| 2  | -4 | 6  | 13.64  | 1.62 |
| -2 | 4  | 6  | 12.68  | 1.35 |
| -2 | -4 | -6 | 14.39  | 1.50 |
| 2  | 4  | -6 | 13.07  | 0.94 |
| 2  | -4 | 6  | 14.73  | 1.61 |
| 2  | -4 | 6  | 13.47  | 0.99 |
| 2  | 4  | -6 | 16.23  | 1.28 |
| -2 | 4  | 6  | 11.39  | 0.85 |

## CIF S3

|    |    |    |       |      |
|----|----|----|-------|------|
| 2  | 4  | -6 | 14.29 | 1.18 |
| 2  | 4  | 6  | 14.10 | 0.90 |
| -2 | -4 | 6  | 14.09 | 0.78 |
| -2 | -4 | 6  | 14.39 | 1.17 |
| -2 | -4 | 6  | 14.46 | 0.81 |
| -2 | 4  | -6 | 14.97 | 1.12 |
| -2 | 4  | -6 | 11.97 | 1.40 |
| -2 | 4  | -6 | 15.29 | 1.57 |
| 2  | -4 | -6 | 13.20 | 1.25 |
| -2 | 4  | -6 | 14.10 | 1.12 |
| 2  | 4  | 6  | 14.89 | 1.61 |
| 2  | 4  | 6  | 13.42 | 1.04 |
| 2  | -4 | -6 | 12.06 | 1.48 |
| 2  | 4  | 6  | 14.81 | 1.76 |
| -2 | 4  | -6 | 12.65 | 0.97 |
| -2 | 4  | -6 | 14.06 | 1.12 |
| 2  | -4 | -6 | 11.62 | 1.22 |
| 3  | 4  | -6 | 5.92  | 0.61 |
| -3 | -4 | -6 | 6.80  | 0.65 |
| 3  | -4 | 6  | 6.35  | 0.79 |
| 3  | -4 | 6  | 4.89  | 1.47 |
| -3 | 4  | 6  | 5.02  | 0.88 |
| -3 | 4  | 6  | 2.77  | 0.82 |
| -3 | 4  | 6  | 7.13  | 0.94 |
| 3  | 4  | -6 | 6.37  | 0.59 |
| -3 | -4 | -6 | 6.78  | 0.87 |
| -3 | -4 | 6  | 6.19  | 0.45 |
| 3  | -4 | -6 | 5.80  | 1.03 |
| -3 | -4 | 6  | 5.67  | 0.37 |
| -3 | 4  | -6 | 5.32  | 1.27 |
| -3 | 4  | -6 | 5.32  | 0.78 |
| 3  | 4  | 6  | 3.01  | 1.45 |
| -3 | -4 | 6  | 6.51  | 0.62 |
| -3 | 4  | -6 | 6.24  | 0.75 |
| -3 | 4  | -6 | 4.50  | 1.35 |
| 3  | -4 | -6 | 5.23  | 0.95 |
| -3 | -4 | 6  | 6.79  | 0.51 |
| -3 | 4  | -6 | 4.84  | 0.91 |
| 3  | -4 | -6 | 5.75  | 0.74 |
| -3 | -4 | 6  | 7.23  | 0.76 |
| -3 | -4 | 6  | 6.04  | 0.38 |

## CIF S3

|    |    |    |       |      |
|----|----|----|-------|------|
| 3  | 4  | 6  | 6.50  | 0.79 |
| -4 | 4  | 6  | 6.61  | 0.75 |
| -4 | -4 | -6 | 7.64  | 0.78 |
| -4 | -4 | -6 | 9.51  | 0.93 |
| 4  | -4 | 6  | 8.48  | 0.91 |
| 4  | -4 | 6  | 7.38  | 0.90 |
| -4 | -4 | -6 | 6.94  | 1.02 |
| -4 | 4  | 6  | 7.79  | 0.69 |
| -4 | -4 | -6 | 7.53  | 0.87 |
| -4 | 4  | 6  | 8.02  | 1.01 |
| 4  | -4 | 6  | 7.07  | 1.70 |
| 4  | 4  | 6  | 7.69  | 1.67 |
| -4 | 4  | -6 | 8.54  | 1.06 |
| 4  | 4  | 6  | 8.54  | 0.82 |
| -4 | 4  | -6 | 8.44  | 0.82 |
| -4 | 4  | -6 | 8.50  | 2.21 |
| 4  | -4 | -6 | 8.11  | 1.07 |
| -4 | -4 | 6  | 8.25  | 0.50 |
| 4  | -4 | -6 | 7.21  | 0.83 |
| -4 | -4 | 6  | 7.47  | 0.56 |
| 4  | -4 | -6 | 6.90  | 1.15 |
| -4 | 4  | -6 | 8.29  | 0.99 |
| -5 | -4 | -6 | 20.86 | 1.41 |
| -5 | 4  | 6  | 18.67 | 1.07 |
| -5 | -4 | -6 | 15.78 | 1.45 |
| -5 | -4 | -6 | 17.18 | 1.16 |
| -5 | -4 | -6 | 16.70 | 1.33 |
| 5  | -4 | 6  | 16.95 | 1.32 |
| -5 | 4  | 6  | 18.61 | 1.16 |
| -5 | -4 | -6 | 17.69 | 1.20 |
| -5 | 4  | 6  | 16.16 | 1.33 |
| 5  | 4  | -6 | 17.80 | 0.94 |
| -5 | 4  | -6 | 17.45 | 1.21 |
| 5  | -4 | -6 | 17.97 | 1.23 |
| -5 | 4  | -6 | 16.58 | 1.47 |
| 5  | 4  | 6  | 16.87 | 1.28 |
| 5  | -4 | -6 | 18.36 | 1.35 |
| -5 | 4  | -6 | 16.76 | 1.33 |
| 5  | -4 | -6 | 13.96 | 1.45 |
| -6 | -4 | -6 | 24.15 | 1.52 |
| -6 | -4 | -6 | 25.32 | 1.64 |

## CIF S3

|    |    |    |       |      |
|----|----|----|-------|------|
| -6 | -4 | -6 | 27.45 | 1.46 |
| -6 | -4 | -6 | 24.94 | 1.46 |
| 6  | -4 | 6  | 22.37 | 1.73 |
| -6 | 4  | 6  | 22.60 | 1.50 |
| -6 | 4  | 6  | 26.63 | 1.49 |
| -6 | -4 | -6 | 24.06 | 1.71 |
| -6 | 4  | -6 | 25.69 | 1.60 |
| -6 | 4  | -6 | 28.45 | 1.99 |
| 6  | -4 | -6 | 20.85 | 1.79 |
| -6 | -4 | 6  | 26.09 | 1.69 |
| 6  | 4  | 6  | 23.63 | 1.67 |
| 6  | -4 | -6 | 22.61 | 1.63 |
| -6 | 4  | -6 | 25.21 | 1.66 |
| -6 | 4  | -6 | 23.69 | 1.51 |
| -7 | -4 | -6 | 11.24 | 1.05 |
| -7 | 4  | 6  | 11.78 | 1.01 |
| -7 | 4  | 6  | 12.67 | 0.92 |
| -7 | -4 | -6 | 13.40 | 1.00 |
| -7 | -4 | -6 | 15.91 | 1.39 |
| -7 | -4 | -6 | 13.14 | 0.84 |
| -7 | -4 | -6 | 12.32 | 0.97 |
| -7 | 4  | -6 | 13.47 | 1.10 |
| -7 | -4 | 6  | 12.22 | 1.26 |
| -8 | -4 | -6 | 4.29  | 0.72 |
| -8 | 4  | 6  | 3.36  | 0.58 |
| -8 | -4 | -6 | 2.58  | 0.68 |
| -8 | -4 | -6 | 3.38  | 1.13 |
| -8 | 4  | 6  | 4.65  | 0.78 |
| -8 | -4 | -6 | 5.20  | 1.10 |
| -8 | 4  | 6  | 4.52  | 0.50 |
| -8 | -4 | -6 | 3.89  | 0.75 |
| -8 | -4 | -6 | 3.81  | 0.74 |
| -8 | 4  | 6  | 2.67  | 0.65 |
| -8 | -4 | -6 | 3.87  | 0.76 |
| -8 | 4  | -6 | 4.53  | 0.85 |
| -8 | 4  | -6 | 4.67  | 0.75 |
| -8 | 4  | -6 | 3.38  | 0.89 |
| -8 | 4  | -6 | 5.59  | 0.86 |
| -8 | 4  | -6 | 3.81  | 0.83 |
| -8 | 4  | -6 | 2.43  | 0.79 |
| -9 | -4 | -6 | -0.19 | 0.36 |

## CIF S3

|     |    |    |        |       |
|-----|----|----|--------|-------|
| -9  | -4 | -6 | 0.14   | 0.32  |
| -9  | -4 | -6 | 0.46   | 0.71  |
| -9  | 4  | 6  | 0.29   | 0.28  |
| -9  | -4 | -6 | 0.06   | 0.35  |
| -9  | 4  | 6  | 0.56   | 0.45  |
| -9  | 4  | 6  | 0.26   | 0.26  |
| -9  | 4  | -6 | 0.31   | 0.41  |
| -9  | 4  | -6 | -0.19  | 0.42  |
| -9  | 4  | -6 | 0.24   | 0.43  |
| -9  | 4  | -6 | -0.41  | 0.39  |
| -9  | 4  | -6 | 0.06   | 0.41  |
| 10  | -4 | 6  | 4.92   | 0.63  |
| -10 | 4  | 6  | 4.82   | 0.51  |
| -10 | 4  | -6 | 4.29   | 0.57  |
| -10 | 4  | -6 | 4.84   | 0.45  |
| -10 | 4  | -6 | 4.10   | 0.48  |
| -10 | 4  | -6 | 5.34   | 0.52  |
| 0   | 5  | -6 | 213.14 | 10.04 |
| 0   | 5  | 6  | 195.88 | 11.18 |
| 0   | -5 | -6 | 165.37 | 10.10 |
| 0   | 5  | 6  | 201.77 | 9.60  |
| 0   | -5 | 6  | 175.01 | 9.57  |
| 0   | 5  | -6 | 201.35 | 10.06 |
| 0   | -5 | -6 | 192.78 | 9.69  |
| 0   | 5  | -6 | 207.46 | 9.80  |
| 0   | 5  | 6  | 207.47 | 10.33 |
| 0   | -5 | 6  | 205.90 | 10.19 |
| 0   | 5  | -6 | 192.05 | 9.70  |
| 0   | 5  | -6 | 196.95 | 10.10 |
| 0   | -5 | -6 | 189.26 | 9.76  |
| 0   | 5  | -6 | 197.44 | 9.70  |
| 1   | 5  | -6 | 35.77  | 2.01  |
| -1  | 5  | 6  | 33.39  | 2.58  |
| 1   | 5  | -6 | 36.43  | 1.99  |
| 1   | 5  | -6 | 34.81  | 2.25  |
| 1   | -5 | 6  | 34.64  | 2.42  |
| -1  | -5 | -6 | 35.34  | 2.03  |
| 1   | -5 | 6  | 31.48  | 1.90  |
| -1  | -5 | -6 | 36.08  | 2.53  |
| 1   | 5  | -6 | 38.53  | 2.33  |
| -1  | 5  | 6  | 36.20  | 1.86  |

## CIF S3

|    |    |    |       |      |
|----|----|----|-------|------|
| -1 | -5 | -6 | 34.21 | 2.60 |
| -1 | 5  | -6 | 33.74 | 2.46 |
| 1  | 5  | 6  | 34.74 | 2.59 |
| 1  | 5  | 6  | 34.98 | 1.88 |
| -1 | -5 | 6  | 39.00 | 2.29 |
| -1 | 5  | -6 | 33.34 | 2.02 |
| -1 | 5  | -6 | 39.14 | 2.47 |
| 1  | -5 | -6 | 38.94 | 2.31 |
| 1  | -5 | -6 | 31.29 | 2.10 |
| 1  | 5  | 6  | 35.22 | 2.67 |
| 1  | -5 | -6 | 33.75 | 2.54 |
| -1 | 5  | -6 | 33.26 | 2.02 |
| -1 | 5  | -6 | 35.52 | 2.10 |
| -1 | -5 | 6  | 35.07 | 2.52 |
| -1 | -5 | 6  | 35.92 | 1.87 |
| 2  | -5 | 6  | 8.21  | 0.83 |
| -2 | -5 | -6 | 8.10  | 0.93 |
| -2 | 5  | 6  | 6.33  | 0.72 |
| -2 | -5 | -6 | 8.06  | 1.26 |
| 2  | 5  | -6 | 8.33  | 0.83 |
| -2 | -5 | -6 | 5.72  | 1.46 |
| 2  | 5  | -6 | 8.00  | 0.78 |
| 2  | -5 | 6  | 7.81  | 1.43 |
| -2 | -5 | 6  | 8.38  | 0.58 |
| -2 | -5 | 6  | 8.66  | 1.06 |
| 2  | -5 | -6 | 6.87  | 1.19 |
| -2 | 5  | -6 | 8.00  | 0.79 |
| 2  | -5 | -6 | 6.19  | 1.43 |
| -2 | 5  | -6 | 7.62  | 0.94 |
| 2  | 5  | 6  | 8.82  | 0.82 |
| -2 | 5  | -6 | 7.57  | 1.39 |
| 2  | 5  | 6  | 8.14  | 0.68 |
| -2 | 5  | -6 | 8.79  | 1.06 |
| -2 | 5  | -6 | 6.54  | 0.97 |
| 2  | 5  | 6  | 8.20  | 1.54 |
| 2  | -5 | -6 | 6.32  | 0.98 |
| -2 | -5 | 6  | 8.36  | 0.61 |
| -3 | -5 | -6 | 4.74  | 0.65 |
| -3 | 5  | 6  | 4.81  | 0.75 |
| -3 | -5 | -6 | 4.81  | 0.84 |
| -3 | 5  | 6  | 5.06  | 0.64 |

## CIF S3

|    |    |    |       |      |
|----|----|----|-------|------|
| 3  | 5  | -6 | 4.58  | 0.65 |
| 3  | -5 | 6  | 6.22  | 1.45 |
| 3  | 5  | -6 | 4.67  | 0.61 |
| 3  | -5 | 6  | 4.43  | 0.79 |
| -3 | -5 | -6 | 4.55  | 1.43 |
| 3  | -5 | -6 | 5.56  | 1.09 |
| 3  | 5  | 6  | 5.12  | 0.74 |
| -3 | -5 | 6  | 5.67  | 0.40 |
| -3 | 5  | -6 | 4.53  | 0.74 |
| -3 | -5 | 6  | 4.81  | 0.42 |
| -3 | 5  | -6 | 5.34  | 0.82 |
| -3 | -5 | 6  | 5.46  | 0.47 |
| -3 | 5  | -6 | 5.84  | 1.30 |
| 3  | -5 | -6 | 3.78  | 1.04 |
| -3 | 5  | -6 | 4.75  | 0.93 |
| -3 | -5 | 6  | 4.38  | 0.57 |
| -3 | -5 | 6  | 5.34  | 0.59 |
| -4 | -5 | -6 | 6.16  | 1.00 |
| -4 | -5 | -6 | 7.10  | 1.00 |
| -4 | -5 | -6 | 6.93  | 0.72 |
| -4 | -5 | -6 | 7.32  | 0.90 |
| 4  | -5 | 6  | 6.14  | 1.01 |
| 4  | 5  | -6 | 6.62  | 0.70 |
| -4 | 5  | 6  | 7.06  | 0.81 |
| -4 | 5  | 6  | 10.06 | 1.16 |
| 4  | 5  | 6  | 7.10  | 0.93 |
| -4 | -5 | 6  | 7.93  | 0.59 |
| 4  | -5 | -6 | 8.56  | 1.11 |
| -4 | 5  | -6 | 7.34  | 1.01 |
| -4 | 5  | -6 | 8.42  | 0.87 |
| -4 | 5  | -6 | 7.01  | 1.20 |
| 4  | -5 | -6 | 5.97  | 1.21 |
| -4 | -5 | 6  | 7.45  | 0.55 |
| -5 | -5 | -6 | 4.86  | 1.11 |
| -5 | -5 | -6 | 2.76  | 0.75 |
| 5  | -5 | 6  | 1.61  | 0.81 |
| -5 | 5  | 6  | 3.08  | 0.75 |
| -5 | -5 | -6 | 2.59  | 0.60 |
| -5 | -5 | -6 | 3.84  | 0.89 |
| -5 | 5  | 6  | 2.77  | 0.75 |
| -5 | 5  | 6  | 2.12  | 0.82 |



## CIF S3

|    |    |    |       |      |
|----|----|----|-------|------|
| -5 | -5 | -6 | 2.98  | 0.70 |
| -5 | 5  | -6 | 2.98  | 0.76 |
| -5 | 5  | -6 | 1.94  | 0.87 |
| 5  | 5  | 6  | 4.30  | 0.79 |
| 5  | -5 | -6 | 2.44  | 0.94 |
| -5 | 5  | -6 | 2.45  | 0.78 |
| -5 | -5 | 6  | 3.16  | 0.85 |
| 5  | -5 | -6 | 2.89  | 1.01 |
| -5 | 5  | -6 | 2.85  | 0.77 |
| -6 | 5  | 6  | 58.68 | 2.86 |
| 6  | -5 | 6  | 47.76 | 3.07 |
| -6 | -5 | -6 | 55.07 | 2.81 |
| -6 | -5 | -6 | 52.95 | 2.82 |
| -6 | -5 | -6 | 56.44 | 2.87 |
| -6 | 5  | 6  | 51.40 | 2.95 |
| -6 | -5 | -6 | 51.74 | 3.00 |
| -6 | -5 | -6 | 53.22 | 2.95 |
| -6 | -5 | -6 | 52.90 | 2.82 |
| 6  | 5  | 6  | 56.57 | 3.06 |
| -6 | 5  | -6 | 54.75 | 3.24 |
| -6 | 5  | -6 | 54.26 | 2.92 |
| -6 | -5 | 6  | 51.85 | 2.89 |
| 6  | -5 | -6 | 52.57 | 3.02 |
| -6 | 5  | -6 | 56.72 | 2.85 |
| -7 | 5  | 6  | 5.57  | 0.85 |
| -7 | -5 | -6 | 4.54  | 0.97 |
| -7 | -5 | -6 | 3.47  | 1.10 |
| -7 | -5 | -6 | 4.54  | 1.14 |
| -7 | -5 | -6 | 4.57  | 0.78 |
| -7 | -5 | -6 | 2.26  | 0.57 |
| -7 | -5 | -6 | 3.91  | 1.13 |
| -7 | 5  | 6  | 2.95  | 0.74 |
| -7 | -5 | -6 | 4.68  | 0.83 |
| -7 | 5  | 6  | 4.45  | 0.87 |
| -7 | 5  | 6  | 4.34  | 0.80 |
| -7 | -5 | -6 | 3.72  | 0.78 |
| -7 | -5 | -6 | 4.12  | 0.81 |
| -7 | 5  | 6  | 5.30  | 0.72 |
| -7 | -5 | 6  | 4.49  | 1.13 |
| -7 | 5  | -6 | 4.78  | 0.87 |
| -7 | 5  | -6 | 4.20  | 0.46 |

## CIF S3

|     |    |    |       |      |
|-----|----|----|-------|------|
| -7  | 5  | -6 | 4.24  | 0.62 |
| -7  | 5  | -6 | 4.32  | 0.97 |
| -7  | 5  | -6 | 4.79  | 1.09 |
| -7  | 5  | -6 | 4.98  | 0.90 |
| -8  | 5  | 6  | 2.91  | 0.62 |
| -8  | -5 | -6 | 1.78  | 0.50 |
| -8  | -5 | -6 | 2.22  | 0.47 |
| -8  | -5 | -6 | 1.51  | 0.99 |
| -8  | 5  | 6  | 2.29  | 0.41 |
| -8  | -5 | -6 | 1.61  | 0.57 |
| -8  | 5  | 6  | 2.93  | 0.75 |
| -8  | 5  | 6  | 1.15  | 0.56 |
| -8  | -5 | -6 | 2.93  | 0.73 |
| -8  | 5  | 6  | 3.07  | 0.55 |
| -8  | -5 | 6  | 3.41  | 0.85 |
| -8  | 5  | -6 | 4.00  | 0.78 |
| -8  | 5  | -6 | 3.03  | 0.91 |
| -8  | 5  | -6 | 2.91  | 0.59 |
| -8  | 5  | -6 | 2.70  | 0.62 |
| -8  | 5  | -6 | 3.09  | 0.54 |
| -8  | 5  | -6 | 2.37  | 0.60 |
| -9  | 5  | 6  | 0.75  | 0.28 |
| -9  | 5  | 6  | 0.40  | 0.52 |
| -9  | -5 | -6 | 0.84  | 0.30 |
| -9  | -5 | -6 | 0.54  | 0.33 |
| -9  | 5  | 6  | 0.74  | 0.43 |
| 9   | -5 | 6  | 1.00  | 0.51 |
| -9  | -5 | -6 | 0.77  | 0.36 |
| -9  | 5  | -6 | 0.74  | 0.44 |
| -9  | 5  | -6 | 1.22  | 0.44 |
| -9  | 5  | -6 | 1.07  | 0.45 |
| -9  | 5  | -6 | 0.90  | 0.40 |
| -9  | 5  | -6 | 0.74  | 0.41 |
| 10  | -5 | 6  | 0.29  | 0.31 |
| -10 | 5  | 6  | -0.04 | 0.28 |
| -10 | 5  | -6 | -0.12 | 0.21 |
| -10 | 5  | -6 | 0.18  | 0.27 |
| -10 | 5  | -6 | -0.15 | 0.27 |
| 0   | -6 | 6  | 59.69 | 3.68 |
| 0   | 6  | -6 | 58.72 | 3.54 |
| 0   | -6 | 6  | 53.10 | 2.87 |

## CIF S3

|    |    |    |       |      |
|----|----|----|-------|------|
| 0  | 6  | -6 | 56.39 | 3.00 |
| 0  | -6 | -6 | 57.88 | 3.09 |
| 0  | 6  | -6 | 57.08 | 3.12 |
| 0  | -6 | -6 | 45.63 | 3.50 |
| 0  | 6  | 6  | 51.36 | 3.66 |
| 0  | 6  | 6  | 60.54 | 2.87 |
| 1  | -6 | 6  | 28.99 | 1.65 |
| 1  | 6  | -6 | 29.45 | 1.74 |
| -1 | 6  | 6  | 30.47 | 1.64 |
| -1 | -6 | -6 | 29.92 | 1.83 |
| 1  | 6  | -6 | 30.60 | 1.82 |
| 1  | -6 | 6  | 25.58 | 2.44 |
| -1 | -6 | -6 | 31.58 | 2.43 |
| -1 | 6  | 6  | 30.02 | 2.45 |
| -1 | 6  | -6 | 30.38 | 1.81 |
| -1 | 6  | -6 | 28.69 | 1.78 |
| 1  | -6 | -6 | 22.73 | 1.86 |
| -1 | -6 | 6  | 28.70 | 1.65 |
| 1  | -6 | -6 | 24.88 | 2.32 |
| 1  | -6 | -6 | 25.11 | 2.12 |
| 1  | 6  | 6  | 29.85 | 1.62 |
| -1 | 6  | -6 | 30.42 | 1.89 |
| -1 | -6 | 6  | 29.43 | 2.36 |
| -1 | 6  | -6 | 33.64 | 2.41 |
| 2  | 6  | -6 | 24.75 | 1.50 |
| 2  | -6 | 6  | 19.49 | 2.05 |
| -2 | -6 | -6 | 23.39 | 1.61 |
| -2 | -6 | -6 | 21.47 | 2.15 |
| 2  | -6 | 6  | 23.85 | 1.41 |
| -2 | 6  | 6  | 21.99 | 1.36 |
| -2 | -6 | -6 | 16.95 | 2.12 |
| 2  | 6  | -6 | 24.68 | 1.43 |
| -2 | 6  | -6 | 23.17 | 2.07 |
| 2  | 6  | 6  | 24.05 | 1.37 |
| -2 | 6  | -6 | 24.41 | 1.41 |
| -2 | -6 | 6  | 21.81 | 1.26 |
| -2 | -6 | 6  | 22.70 | 1.23 |
| -2 | 6  | -6 | 24.07 | 1.63 |
| 2  | -6 | -6 | 19.30 | 1.71 |
| 2  | 6  | 6  | 24.11 | 1.45 |
| 2  | -6 | -6 | 19.70 | 1.70 |

## CIF S3

|    |    |    |       |      |
|----|----|----|-------|------|
| -2 | -6 | 6  | 24.39 | 1.45 |
| 2  | -6 | -6 | 17.79 | 1.99 |
| -2 | -6 | 6  | 21.23 | 1.31 |
| 3  | 6  | -6 | 4.31  | 0.74 |
| -3 | -6 | -6 | 3.64  | 0.67 |
| -3 | -6 | -6 | 4.41  | 1.02 |
| -3 | 6  | 6  | 3.50  | 0.67 |
| -3 | 6  | 6  | 3.39  | 0.66 |
| -3 | -6 | -6 | 4.44  | 0.89 |
| 3  | -6 | 6  | 4.39  | 0.85 |
| 3  | 6  | -6 | 4.46  | 0.68 |
| -3 | -6 | 6  | 4.47  | 0.43 |
| -3 | -6 | 6  | 4.43  | 0.55 |
| -3 | 6  | -6 | 2.75  | 0.83 |
| 3  | 6  | 6  | 3.43  | 0.77 |
| -3 | -6 | 6  | 3.88  | 0.78 |
| 3  | -6 | -6 | 2.68  | 1.17 |
| -3 | -6 | 6  | 4.78  | 0.61 |
| -3 | 6  | -6 | 3.70  | 0.95 |
| 3  | -6 | -6 | 2.22  | 1.03 |
| -3 | 6  | -6 | 3.95  | 0.86 |
| -3 | -6 | 6  | 4.19  | 0.63 |
| -4 | -6 | -6 | 8.79  | 1.07 |
| -4 | -6 | -6 | 9.14  | 1.18 |
| -4 | 6  | 6  | 8.71  | 0.87 |
| -4 | -6 | -6 | 8.99  | 1.06 |
| 4  | 6  | -6 | 8.71  | 0.87 |
| -4 | -6 | -6 | 7.89  | 1.11 |
| -4 | 6  | 6  | 9.06  | 0.88 |
| -4 | -6 | -6 | 9.93  | 0.97 |
| 4  | -6 | 6  | 10.40 | 1.14 |
| -4 | -6 | -6 | 8.49  | 0.82 |
| -4 | -6 | 6  | 9.01  | 0.73 |
| -4 | -6 | 6  | 7.85  | 1.00 |
| -4 | 6  | -6 | 8.69  | 0.98 |
| -4 | 6  | -6 | 9.43  | 1.04 |
| -4 | 6  | -6 | 8.92  | 1.18 |
| 4  | -6 | -6 | 7.45  | 1.31 |
| 4  | 6  | 6  | 9.99  | 1.05 |
| 4  | -6 | -6 | 7.43  | 1.20 |
| -5 | 6  | 6  | 19.00 | 1.58 |

## CIF S3

|    |    |    |       |      |
|----|----|----|-------|------|
| -5 | -6 | -6 | 19.01 | 1.26 |
| -5 | -6 | -6 | 17.70 | 1.46 |
| -5 | -6 | -6 | 17.88 | 1.51 |
| -5 | 6  | 6  | 18.73 | 1.30 |
| -5 | 6  | 6  | 16.74 | 1.22 |
| -5 | -6 | -6 | 19.08 | 1.20 |
| -5 | -6 | -6 | 18.71 | 1.26 |
| 5  | -6 | -6 | 14.16 | 1.49 |
| 5  | -6 | -6 | 11.74 | 1.58 |
| -5 | 6  | -6 | 19.81 | 1.60 |
| -5 | -6 | 6  | 15.76 | 1.29 |
| -5 | -6 | 6  | 17.74 | 1.44 |
| -5 | 6  | -6 | 20.19 | 1.33 |
| 5  | 6  | 6  | 17.12 | 1.40 |
| -5 | -6 | 6  | 17.20 | 1.07 |
| -5 | 6  | -6 | 17.97 | 1.26 |
| -5 | 6  | -6 | 19.49 | 1.46 |
| -6 | -6 | -6 | 3.06  | 1.06 |
| -6 | -6 | -6 | 3.50  | 0.80 |
| -6 | 6  | 6  | 3.72  | 0.73 |
| -6 | -6 | -6 | 4.33  | 0.80 |
| -6 | 6  | 6  | 4.15  | 1.20 |
| -6 | -6 | -6 | 5.06  | 0.87 |
| -6 | -6 | -6 | 2.82  | 0.95 |
| -6 | -6 | -6 | 2.47  | 0.74 |
| -6 | 6  | 6  | 3.35  | 0.74 |
| -6 | -6 | 6  | 3.40  | 0.76 |
| -6 | 6  | -6 | 4.20  | 0.99 |
| -6 | 6  | -6 | 3.98  | 0.83 |
| -6 | 6  | -6 | 3.72  | 0.82 |
| 6  | -6 | -6 | 2.78  | 1.54 |
| -7 | -6 | -6 | 20.95 | 1.37 |
| -7 | -6 | -6 | 20.35 | 1.87 |
| -7 | 6  | 6  | 20.07 | 1.32 |
| 7  | -6 | 6  | 21.69 | 1.57 |
| -7 | 6  | 6  | 20.10 | 1.27 |
| -7 | 6  | 6  | 21.30 | 1.45 |
| -7 | -6 | -6 | 21.45 | 1.25 |
| -7 | 6  | 6  | 20.28 | 1.37 |
| -7 | -6 | -6 | 21.27 | 1.81 |
| -7 | -6 | -6 | 17.92 | 1.33 |

## CIF S3

|    |    |    |       |      |
|----|----|----|-------|------|
| -7 | -6 | -6 | 15.91 | 1.27 |
| -7 | 6  | 6  | 17.56 | 1.46 |
| -7 | 6  | 6  | 21.77 | 1.37 |
| -7 | -6 | -6 | 19.55 | 1.35 |
| -7 | -6 | -6 | 19.49 | 1.61 |
| -7 | 6  | -6 | 20.19 | 1.30 |
| -7 | 6  | -6 | 21.50 | 1.37 |
| -7 | 6  | -6 | 19.24 | 1.12 |
| -7 | 6  | -6 | 21.47 | 1.42 |
| -7 | 6  | -6 | 20.32 | 1.90 |
| -7 | -6 | 6  | 22.21 | 1.54 |
| -8 | 6  | 6  | 3.72  | 0.51 |
| 8  | -6 | 6  | 3.42  | 0.99 |
| -8 | 6  | 6  | 3.74  | 0.62 |
| -8 | 6  | 6  | 3.40  | 0.77 |
| -8 | 6  | 6  | 3.23  | 0.57 |
| -8 | -6 | -6 | 2.44  | 0.87 |
| -8 | -6 | -6 | 3.10  | 0.70 |
| -8 | -6 | -6 | 6.89  | 1.58 |
| -8 | 6  | 6  | 2.84  | 0.59 |
| -8 | -6 | -6 | 1.95  | 0.51 |
| -8 | -6 | -6 | 2.55  | 0.76 |
| -8 | 6  | -6 | 3.28  | 0.76 |
| -8 | -6 | 6  | 2.59  | 0.79 |
| -8 | 6  | -6 | 3.15  | 0.84 |
| -8 | 6  | -6 | 1.89  | 0.91 |
| -8 | 6  | -6 | 4.54  | 0.90 |
| -8 | 6  | -6 | 3.58  | 0.72 |
| -8 | 6  | -6 | 3.25  | 0.62 |
| 9  | -6 | 6  | 0.88  | 0.43 |
| -9 | 6  | 6  | 0.98  | 0.26 |
| -9 | -6 | -6 | 1.02  | 0.35 |
| -9 | 6  | 6  | 0.58  | 0.38 |
| -9 | 6  | -6 | 1.02  | 0.41 |
| -9 | 6  | -6 | 0.61  | 0.39 |
| -9 | 6  | -6 | 1.09  | 0.42 |
| -9 | 6  | -6 | 0.14  | 0.40 |
| 0  | -7 | 6  | 7.01  | 0.88 |
| 0  | 7  | -6 | 9.08  | 1.05 |
| 0  | 7  | 6  | 9.91  | 0.82 |
| 0  | 7  | -6 | 8.69  | 1.14 |

## CIF S3

|    |    |    |       |      |
|----|----|----|-------|------|
| 0  | -7 | -6 | 7.23  | 2.01 |
| 0  | -7 | 6  | 6.79  | 1.80 |
| 0  | 7  | -6 | 9.74  | 1.56 |
| 0  | 7  | 6  | 6.87  | 1.64 |
| 0  | -7 | 6  | 9.68  | 1.06 |
| 0  | -7 | -6 | 9.49  | 1.18 |
| 0  | -7 | 6  | 8.49  | 0.80 |
| -1 | -7 | -6 | 13.78 | 1.27 |
| -1 | 7  | 6  | 12.30 | 1.05 |
| 1  | -7 | 6  | 13.36 | 1.09 |
| 1  | -7 | 6  | 13.49 | 1.14 |
| -1 | -7 | -6 | 8.98  | 1.59 |
| 1  | 7  | -6 | 13.59 | 1.10 |
| 1  | 7  | -6 | 12.67 | 1.20 |
| -1 | 7  | -6 | 13.69 | 1.18 |
| -1 | 7  | -6 | 12.49 | 1.30 |
| -1 | 7  | -6 | 14.28 | 1.17 |
| -1 | -7 | 6  | 12.75 | 1.62 |
| -1 | -7 | 6  | 12.31 | 1.00 |
| 1  | 7  | 6  | 14.23 | 0.95 |
| -1 | -7 | 6  | 11.80 | 1.03 |
| 1  | -7 | -6 | 12.69 | 1.44 |
| -2 | -7 | -6 | 27.99 | 2.13 |
| 2  | -7 | 6  | 33.12 | 1.85 |
| -2 | -7 | -6 | 30.48 | 2.05 |
| -2 | 7  | 6  | 32.43 | 1.83 |
| 2  | -7 | 6  | 30.97 | 1.93 |
| 2  | 7  | -6 | 35.31 | 1.94 |
| 2  | 7  | -6 | 32.50 | 1.99 |
| 2  | -7 | -6 | 28.12 | 3.05 |
| 2  | 7  | 6  | 27.67 | 1.95 |
| -2 | -7 | 6  | 31.36 | 1.83 |
| -2 | -7 | 6  | 34.33 | 1.90 |
| -2 | -7 | 6  | 31.41 | 1.77 |
| -2 | -7 | 6  | 32.26 | 1.85 |
| -2 | 7  | -6 | 31.00 | 1.87 |
| -2 | 7  | -6 | 34.08 | 2.03 |
| 2  | -7 | -6 | 26.22 | 2.04 |
| -3 | -7 | -6 | 12.00 | 1.37 |
| 3  | 7  | -6 | 14.97 | 1.19 |
| -3 | 7  | 6  | 10.82 | 1.34 |

## CIF S3

|    |    |    |       |      |
|----|----|----|-------|------|
| 3  | -7 | 6  | 14.26 | 1.41 |
| -3 | 7  | 6  | 12.41 | 1.04 |
| 3  | 7  | -6 | 14.48 | 1.12 |
| -3 | -7 | -6 | 12.93 | 1.01 |
| 3  | -7 | 6  | 14.12 | 1.17 |
| -3 | 7  | 6  | 13.99 | 1.03 |
| -3 | -7 | -6 | 10.34 | 1.25 |
| 3  | -7 | -6 | 8.88  | 1.37 |
| -3 | 7  | -6 | 13.75 | 1.33 |
| 3  | -7 | -6 | 10.48 | 1.43 |
| -3 | -7 | 6  | 11.95 | 1.14 |
| 3  | 7  | 6  | 12.08 | 1.12 |
| -3 | 7  | -6 | 14.33 | 1.14 |
| -3 | -7 | 6  | 12.09 | 0.87 |
| -3 | -7 | 6  | 13.61 | 0.82 |
| -3 | -7 | 6  | 14.60 | 1.07 |
| -3 | -7 | 6  | 13.71 | 0.98 |
| -3 | -7 | 6  | 15.00 | 1.11 |
| -3 | 7  | -6 | 14.62 | 1.23 |
| 4  | -7 | 6  | 6.58  | 1.03 |
| -4 | 7  | 6  | 6.22  | 0.98 |
| -4 | 7  | 6  | 7.37  | 0.89 |
| -4 | -7 | -6 | 5.16  | 1.03 |
| -4 | -7 | -6 | 5.32  | 0.81 |
| 4  | 7  | -6 | 7.94  | 0.92 |
| -4 | -7 | -6 | 7.60  | 1.06 |
| -4 | -7 | -6 | 5.96  | 0.95 |
| -4 | -7 | 6  | 7.17  | 1.03 |
| -4 | -7 | 6  | 5.74  | 1.00 |
| -4 | -7 | 6  | 5.91  | 0.72 |
| -4 | 7  | -6 | 7.38  | 1.31 |
| -4 | 7  | -6 | 7.13  | 1.03 |
| -4 | -7 | 6  | 6.25  | 0.49 |
| -4 | 7  | -6 | 6.62  | 0.97 |
| 4  | -7 | -6 | 4.82  | 1.22 |
| 4  | -7 | -6 | 4.31  | 1.27 |
| 4  | 7  | 6  | 6.86  | 1.01 |
| -5 | 7  | 6  | 9.82  | 1.06 |
| -5 | -7 | -6 | 6.40  | 1.34 |
| -5 | -7 | -6 | 7.17  | 0.99 |
| -5 | -7 | -6 | 9.38  | 0.99 |



## CIF S3

|    |    |    |      |      |
|----|----|----|------|------|
| -5 | 7  | 6  | 6.81 | 0.94 |
| -5 | -7 | -6 | 7.45 | 1.32 |
| -5 | -7 | -6 | 7.74 | 1.05 |
| -5 | -7 | -6 | 8.23 | 0.91 |
| -5 | 7  | -6 | 8.32 | 1.08 |
| -5 | -7 | 6  | 8.16 | 0.71 |
| -5 | 7  | -6 | 7.33 | 1.16 |
| -5 | -7 | 6  | 6.05 | 1.16 |
| 5  | 7  | 6  | 7.15 | 1.07 |
| -5 | 7  | -6 | 5.95 | 1.26 |
| 5  | -7 | -6 | 7.05 | 1.31 |
| -5 | 7  | -6 | 6.53 | 1.01 |
| -5 | -7 | 6  | 8.71 | 1.14 |
| -6 | 7  | 6  | 3.84 | 0.90 |
| -6 | -7 | -6 | 3.82 | 0.88 |
| -6 | 7  | 6  | 3.49 | 0.80 |
| -6 | 7  | 6  | 5.87 | 0.88 |
| -6 | -7 | -6 | 2.91 | 0.77 |
| -6 | -7 | -6 | 3.18 | 0.68 |
| -6 | -7 | -6 | 4.18 | 0.73 |
| -6 | 7  | 6  | 3.09 | 0.77 |
| -6 | 7  | 6  | 3.17 | 0.69 |
| -6 | 7  | 6  | 3.35 | 0.96 |
| -6 | -7 | -6 | 3.62 | 0.72 |
| 6  | -7 | 6  | 4.53 | 1.09 |
| -6 | -7 | -6 | 3.79 | 1.07 |
| -6 | -7 | -6 | 4.73 | 1.21 |
| -6 | 7  | 6  | 3.56 | 1.01 |
| -6 | -7 | -6 | 4.60 | 0.78 |
| -6 | -7 | -6 | 2.96 | 1.04 |
| -6 | 7  | 6  | 5.18 | 0.98 |
| -6 | 7  | -6 | 5.35 | 1.22 |
| -6 | -7 | 6  | 4.18 | 1.13 |
| -6 | -7 | 6  | 5.08 | 1.21 |
| -6 | 7  | -6 | 4.41 | 0.91 |
| -6 | 7  | -6 | 4.72 | 0.97 |
| -6 | 7  | -6 | 4.44 | 0.81 |
| -6 | -7 | 6  | 4.33 | 0.53 |
| -6 | 7  | -6 | 5.46 | 1.01 |
| -6 | -7 | 6  | 3.91 | 0.44 |
| -6 | 7  | -6 | 3.45 | 0.89 |

## CIF S3

|    |    |    |       |      |
|----|----|----|-------|------|
| -7 | -7 | -6 | 0.53  | 0.58 |
| -7 | -7 | -6 | 1.02  | 0.53 |
| -7 | -7 | -6 | 1.34  | 0.83 |
| -7 | -7 | -6 | 0.27  | 0.59 |
| -7 | 7  | 6  | 1.05  | 0.53 |
| -7 | -7 | -6 | 0.68  | 0.54 |
| -7 | -7 | -6 | 0.82  | 0.52 |
| -7 | -7 | -6 | 1.03  | 0.95 |
| -7 | -7 | -6 | -0.44 | 1.00 |
| -7 | 7  | 6  | 0.31  | 0.52 |
| -7 | 7  | 6  | 0.24  | 0.66 |
| 7  | -7 | 6  | 0.61  | 0.61 |
| -7 | 7  | 6  | 0.60  | 0.51 |
| -7 | 7  | 6  | 0.02  | 0.51 |
| -7 | 7  | 6  | 0.46  | 0.63 |
| -7 | -7 | 6  | -0.47 | 0.76 |
| -7 | 7  | -6 | 0.01  | 0.63 |
| -7 | 7  | -6 | 1.25  | 1.07 |
| -7 | 7  | -6 | 0.55  | 0.59 |
| -8 | -7 | -6 | 5.73  | 1.39 |
| -8 | 7  | 6  | 1.66  | 0.47 |
| 8  | -7 | 6  | 1.37  | 0.58 |
| -8 | 7  | 6  | 3.57  | 0.59 |
| -8 | -7 | -6 | 3.23  | 0.66 |
| -8 | 7  | 6  | 2.96  | 0.61 |
| -8 | -7 | -6 | 2.80  | 0.64 |
| -8 | 7  | 6  | 2.72  | 0.51 |
| -8 | 7  | -6 | 1.60  | 0.52 |
| -8 | 7  | -6 | 4.07  | 0.80 |
| -8 | 7  | -6 | 2.40  | 0.47 |
| -8 | 7  | -6 | 3.32  | 0.73 |
| -8 | 7  | -6 | 3.49  | 0.91 |
| -8 | -7 | 6  | 2.51  | 0.75 |
| -9 | 7  | 6  | 2.56  | 0.41 |
| -9 | 7  | 6  | 2.51  | 0.40 |
| -9 | -7 | -6 | 3.17  | 0.42 |
| -9 | 7  | 6  | 2.36  | 0.52 |
| 9  | -7 | 6  | 2.51  | 0.60 |
| -9 | -7 | -6 | 2.87  | 0.47 |
| -9 | 7  | -6 | 2.58  | 0.50 |
| -9 | 7  | -6 | 1.91  | 0.40 |

## CIF S3

|    |    |    |       |      |
|----|----|----|-------|------|
| -9 | 7  | -6 | 2.62  | 0.56 |
| -9 | 7  | -6 | 2.50  | 0.55 |
| 0  | -8 | 6  | 40.76 | 2.32 |
| 0  | 8  | -6 | 41.71 | 2.49 |
| 0  | 8  | -6 | 39.42 | 2.62 |
| 0  | -8 | 6  | 45.07 | 2.33 |
| 0  | 8  | 6  | 42.55 | 2.38 |
| 0  | -8 | 6  | 42.67 | 2.31 |
| 0  | -8 | 6  | 44.23 | 2.32 |
| 0  | 8  | -6 | 41.93 | 2.51 |
| 1  | -8 | 6  | 3.28  | 0.91 |
| -1 | 8  | 6  | 3.89  | 0.76 |
| 1  | 8  | -6 | 3.93  | 1.00 |
| 1  | -8 | 6  | 4.81  | 1.03 |
| 1  | 8  | -6 | 3.47  | 0.93 |
| -1 | -8 | 6  | 2.35  | 0.66 |
| -1 | 8  | -6 | 4.57  | 0.95 |
| -1 | 8  | -6 | 3.80  | 0.91 |
| -1 | -8 | 6  | 3.30  | 0.87 |
| -1 | -8 | 6  | 3.76  | 0.73 |
| 1  | 8  | 6  | 3.42  | 0.74 |
| -1 | -8 | 6  | 4.33  | 0.76 |
| -2 | 8  | 6  | 28.01 | 1.69 |
| -2 | -8 | -6 | 27.35 | 1.67 |
| 2  | -8 | 6  | 29.29 | 1.76 |
| 2  | 8  | -6 | 30.99 | 1.98 |
| 2  | 8  | -6 | 27.68 | 1.83 |
| 2  | -8 | 6  | 29.07 | 1.90 |
| -2 | 8  | 6  | 28.42 | 1.73 |
| -2 | -8 | 6  | 28.68 | 1.74 |
| -2 | -8 | 6  | 27.45 | 1.76 |
| -2 | -8 | 6  | 28.90 | 1.85 |
| -2 | 8  | -6 | 27.98 | 1.93 |
| -2 | -8 | 6  | 28.51 | 1.59 |
| -2 | 8  | -6 | 27.30 | 1.77 |
| -2 | -8 | 6  | 27.62 | 1.68 |
| 3  | -8 | 6  | 21.90 | 1.47 |
| -3 | -8 | -6 | 19.10 | 1.39 |
| -3 | -8 | -6 | 20.58 | 1.51 |
| -3 | -8 | -6 | 21.83 | 1.39 |
| 3  | -8 | 6  | 19.84 | 1.50 |

## CIF S3

|    |    |    |       |      |
|----|----|----|-------|------|
| -3 | 8  | 6  | 18.70 | 1.33 |
| -3 | 8  | 6  | 20.53 | 1.33 |
| -3 | -8 | -6 | 19.83 | 1.53 |
| 3  | 8  | -6 | 20.21 | 1.46 |
| 3  | 8  | -6 | 17.52 | 1.54 |
| -3 | -8 | -6 | 18.02 | 1.40 |
| 3  | -8 | -6 | 16.67 | 1.76 |
| -3 | 8  | -6 | 20.30 | 1.60 |
| -3 | -8 | 6  | 21.48 | 1.37 |
| -3 | -8 | 6  | 18.23 | 1.56 |
| -3 | -8 | 6  | 18.41 | 1.34 |
| 3  | 8  | 6  | 19.13 | 1.46 |
| -3 | 8  | -6 | 17.68 | 1.61 |
| -3 | -8 | 6  | 20.43 | 1.39 |
| -3 | -8 | 6  | 19.49 | 1.31 |
| -3 | 8  | -6 | 20.56 | 1.51 |
| -3 | -8 | 6  | 19.08 | 1.14 |
| -3 | -8 | 6  | 19.07 | 1.28 |
| -4 | -8 | -6 | 2.99  | 0.96 |
| 4  | 8  | -6 | 0.45  | 0.68 |
| -4 | -8 | -6 | 1.36  | 0.71 |
| -4 | 8  | 6  | -0.17 | 0.67 |
| 4  | -8 | 6  | 0.10  | 0.83 |
| 4  | 8  | -6 | 0.64  | 1.19 |
| -4 | -8 | -6 | 1.09  | 0.64 |
| -4 | -8 | -6 | 0.62  | 0.94 |
| -4 | 8  | -6 | 0.29  | 0.88 |
| -4 | -8 | 6  | 0.53  | 0.91 |
| -4 | -8 | 6  | 1.21  | 0.82 |
| 4  | 8  | 6  | 2.26  | 0.86 |
| 4  | -8 | -6 | -1.22 | 1.08 |
| -4 | -8 | 6  | 0.77  | 0.75 |
| 4  | -8 | -6 | -0.99 | 1.32 |
| -4 | -8 | 6  | 0.66  | 0.36 |
| -4 | 8  | -6 | 0.42  | 0.84 |
| -4 | 8  | -6 | 0.53  | 0.73 |
| -4 | -8 | 6  | 1.32  | 0.57 |
| -5 | 8  | 6  | 7.86  | 1.09 |
| 5  | -8 | 6  | 11.31 | 1.40 |
| -5 | -8 | -6 | 8.57  | 0.95 |
| -5 | -8 | -6 | 7.43  | 1.23 |

## CIF S3

|    |    |    |       |      |
|----|----|----|-------|------|
| -5 | -8 | -6 | 10.26 | 1.03 |
| -5 | 8  | 6  | 7.58  | 0.96 |
| -5 | -8 | -6 | 8.85  | 1.09 |
| -5 | -8 | -6 | 9.39  | 0.99 |
| -5 | -8 | -6 | 10.92 | 1.37 |
| -5 | 8  | -6 | 7.98  | 1.20 |
| -5 | -8 | 6  | 8.76  | 1.20 |
| -5 | -8 | 6  | 8.28  | 0.78 |
| -5 | 8  | -6 | 5.57  | 1.17 |
| -5 | -8 | 6  | 8.81  | 1.21 |
| -6 | 8  | 6  | 0.82  | 0.64 |
| -6 | 8  | 6  | 1.36  | 0.64 |
| -6 | -8 | -6 | 0.79  | 0.62 |
| -6 | -8 | -6 | 0.85  | 0.96 |
| -6 | 8  | 6  | 0.78  | 0.56 |
| 6  | -8 | 6  | 1.31  | 0.61 |
| -6 | 8  | 6  | 1.26  | 0.66 |
| -6 | -8 | -6 | 1.03  | 0.64 |
| -6 | 8  | 6  | -0.08 | 0.84 |
| -6 | -8 | -6 | 0.87  | 0.33 |
| -6 | 8  | 6  | 0.32  | 0.62 |
| -6 | -8 | -6 | 0.92  | 0.64 |
| -6 | -8 | -6 | 0.01  | 0.64 |
| -6 | -8 | -6 | 0.23  | 1.01 |
| -6 | 8  | 6  | 0.20  | 0.73 |
| -6 | 8  | 6  | 0.90  | 0.58 |
| -6 | -8 | 6  | 0.47  | 0.78 |
| -6 | -8 | 6  | 1.03  | 0.29 |
| -6 | 8  | -6 | 0.49  | 1.04 |
| -6 | 8  | -6 | 1.49  | 0.59 |
| -6 | 8  | -6 | 1.20  | 0.74 |
| -6 | -8 | 6  | 0.66  | 0.88 |
| -6 | -8 | 6  | 0.98  | 0.37 |
| -7 | -8 | -6 | 0.11  | 0.51 |
| 7  | -8 | 6  | -0.62 | 0.56 |
| -7 | 8  | 6  | -0.14 | 0.49 |
| -7 | -8 | -6 | 0.22  | 0.50 |
| -7 | -8 | -6 | 1.02  | 0.87 |
| -7 | 8  | 6  | -0.26 | 0.47 |
| -7 | 8  | 6  | 0.11  | 0.50 |
| -7 | -8 | -6 | -0.18 | 0.51 |

## CIF S3

|    |    |    |       |      |
|----|----|----|-------|------|
| -7 | 8  | 6  | 0.51  | 0.51 |
| -7 | 8  | 6  | 0.02  | 0.58 |
| -7 | -8 | -6 | 0.47  | 0.79 |
| -7 | 8  | -6 | 0.30  | 0.98 |
| -7 | 8  | -6 | 0.49  | 0.60 |
| -7 | 8  | -6 | -0.91 | 0.59 |
| -7 | -8 | 6  | -1.11 | 0.73 |
| -8 | 8  | 6  | 0.67  | 0.36 |
| -8 | -8 | -6 | 0.78  | 0.42 |
| -8 | 8  | 6  | 0.65  | 0.38 |
| -8 | 8  | 6  | 0.92  | 0.34 |
| -8 | -8 | -6 | 0.52  | 0.41 |
| 8  | -8 | 6  | 0.81  | 0.44 |
| -8 | -8 | -6 | 0.44  | 0.36 |
| -8 | 8  | 6  | 0.86  | 0.40 |
| -8 | 8  | -6 | 0.76  | 0.75 |
| -8 | 8  | -6 | 0.73  | 0.38 |
| -8 | -8 | 6  | 1.18  | 0.65 |
| -8 | 8  | -6 | 1.42  | 0.74 |
| -8 | 8  | -6 | 1.11  | 0.51 |
| -9 | 8  | 6  | 0.49  | 0.31 |
| -9 | -8 | -6 | 0.14  | 0.41 |
| 9  | -8 | 6  | 0.99  | 0.39 |
| -9 | 8  | 6  | 0.44  | 0.21 |
| -9 | -8 | -6 | 0.58  | 0.33 |
| -9 | 8  | -6 | 0.13  | 0.27 |
| -9 | 8  | -6 | -0.09 | 0.32 |
| -9 | 8  | -6 | 0.50  | 0.28 |
| 0  | -9 | 6  | 6.19  | 0.95 |
| 0  | -9 | 6  | 6.27  | 0.92 |
| 0  | -9 | 6  | 6.70  | 0.87 |
| 0  | 9  | -6 | 4.97  | 1.07 |
| 0  | -9 | 6  | 6.16  | 1.02 |
| 0  | 9  | 6  | 8.72  | 1.04 |
| 0  | 9  | -6 | 7.54  | 1.23 |
| 0  | 9  | -6 | 5.09  | 1.15 |
| 1  | -9 | 6  | 4.83  | 0.89 |
| -1 | 9  | 6  | 3.48  | 0.96 |
| 1  | 9  | -6 | 4.22  | 1.16 |
| 1  | -9 | 6  | 4.74  | 0.81 |
| 1  | 9  | -6 | 5.10  | 1.14 |

## CIF S3

|    |    |    |       |      |
|----|----|----|-------|------|
| 1  | -9 | 6  | 4.75  | 0.90 |
| 1  | 9  | 6  | 4.97  | 0.87 |
| -1 | -9 | 6  | 5.14  | 0.95 |
| -1 | -9 | 6  | 5.24  | 1.00 |
| -1 | 9  | -6 | 6.07  | 1.14 |
| -1 | -9 | 6  | 4.30  | 0.78 |
| -1 | -9 | 6  | 4.70  | 0.88 |
| -1 | 9  | -6 | 5.01  | 1.04 |
| -1 | -9 | 6  | 5.28  | 0.99 |
| 2  | 9  | -6 | 41.82 | 2.53 |
| -2 | -9 | -6 | 40.68 | 2.33 |
| 2  | -9 | 6  | 41.96 | 2.38 |
| -2 | -9 | -6 | 41.35 | 2.32 |
| -2 | 9  | 6  | 42.64 | 2.38 |
| -2 | 9  | 6  | 41.68 | 2.32 |
| 2  | -9 | 6  | 44.02 | 2.45 |
| 2  | -9 | 6  | 40.32 | 2.48 |
| -2 | 9  | -6 | 43.26 | 2.61 |
| -2 | -9 | 6  | 40.63 | 2.37 |
| -2 | -9 | 6  | 39.26 | 2.47 |
| -2 | -9 | 6  | 41.17 | 2.31 |
| -2 | -9 | 6  | 40.48 | 2.36 |
| -2 | -9 | 6  | 41.15 | 2.24 |
| -3 | -9 | -6 | 0.79  | 1.07 |
| -3 | -9 | -6 | 1.64  | 0.96 |
| 3  | -9 | 6  | 2.92  | 0.81 |
| 3  | -9 | 6  | 1.85  | 0.95 |
| -3 | -9 | -6 | 2.22  | 0.79 |
| 3  | 9  | -6 | 2.91  | 0.95 |
| -3 | 9  | 6  | 1.25  | 0.68 |
| -3 | -9 | -6 | 1.89  | 0.85 |
| -3 | 9  | 6  | 2.22  | 0.74 |
| -3 | -9 | -6 | 2.88  | 0.83 |
| -3 | -9 | 6  | 2.54  | 0.68 |
| -3 | -9 | 6  | 1.64  | 0.80 |
| -3 | 9  | -6 | 1.29  | 0.87 |
| -3 | -9 | 6  | 2.21  | 0.57 |
| 3  | -9 | -6 | 1.33  | 1.56 |
| -3 | 9  | -6 | 0.13  | 0.87 |
| -3 | -9 | 6  | 1.81  | 0.80 |
| 3  | 9  | 6  | 0.35  | 0.90 |

## CIF S3

|    |    |    |       |      |
|----|----|----|-------|------|
| -3 | 9  | -6 | 1.93  | 0.78 |
| -3 | -9 | 6  | 2.60  | 0.56 |
| -3 | -9 | 6  | 2.15  | 0.86 |
| -3 | -9 | 6  | 1.23  | 0.67 |
| -4 | -9 | -6 | 24.75 | 1.74 |
| 4  | -9 | 6  | 26.91 | 1.81 |
| -4 | -9 | -6 | 25.29 | 1.65 |
| -4 | 9  | 6  | 23.30 | 1.60 |
| -4 | -9 | -6 | 23.78 | 1.67 |
| -4 | -9 | -6 | 23.63 | 1.60 |
| -4 | -9 | -6 | 26.43 | 1.69 |
| -4 | -9 | -6 | 24.04 | 1.57 |
| -4 | 9  | -6 | 20.57 | 1.66 |
| -4 | -9 | 6  | 24.87 | 1.64 |
| -4 | 9  | -6 | 21.77 | 1.80 |
| -4 | -9 | 6  | 23.62 | 1.72 |
| -4 | -9 | 6  | 24.66 | 1.49 |
| -4 | -9 | 6  | 26.30 | 1.86 |
| 5  | -9 | 6  | 11.79 | 1.12 |
| -5 | -9 | -6 | 16.71 | 1.53 |
| -5 | 9  | 6  | 12.75 | 1.24 |
| -5 | -9 | -6 | 14.55 | 1.20 |
| -5 | 9  | 6  | 12.30 | 1.47 |
| -5 | -9 | -6 | 15.39 | 1.24 |
| 5  | -9 | 6  | 11.04 | 1.44 |
| -5 | 9  | 6  | 13.70 | 1.28 |
| -5 | 9  | 6  | 14.49 | 1.20 |
| -5 | 9  | 6  | 15.57 | 1.18 |
| -5 | -9 | -6 | 14.03 | 1.59 |
| -5 | 9  | 6  | 11.48 | 1.35 |
| -5 | -9 | -6 | 12.37 | 1.16 |
| -5 | -9 | -6 | 13.65 | 1.07 |
| -5 | 9  | -6 | 13.93 | 1.71 |
| -5 | -9 | 6  | 13.43 | 0.90 |
| -5 | -9 | 6  | 13.33 | 0.89 |
| -5 | -9 | 6  | 13.53 | 0.96 |
| -5 | -9 | 6  | 15.88 | 1.37 |
| -5 | -9 | 6  | 12.87 | 1.11 |
| -5 | -9 | 6  | 14.33 | 1.34 |
| -5 | 9  | -6 | 10.96 | 1.40 |
| -5 | 9  | -6 | 14.32 | 1.66 |



## CIF S3

|    |    |    |       |      |
|----|----|----|-------|------|
| -6 | 9  | 6  | 1.31  | 0.57 |
| -6 | 9  | 6  | 1.54  | 0.62 |
| 6  | -9 | 6  | 1.70  | 0.56 |
| -6 | -9 | -6 | 1.78  | 0.60 |
| -6 | 9  | 6  | 1.90  | 0.62 |
| -6 | -9 | -6 | 3.13  | 0.98 |
| -6 | -9 | -6 | 2.29  | 0.65 |
| -6 | 9  | 6  | 1.40  | 0.57 |
| -6 | 9  | 6  | -0.59 | 0.96 |
| -6 | -9 | -6 | 3.03  | 0.78 |
| -6 | -9 | -6 | 1.72  | 0.98 |
| -6 | 9  | 6  | 1.53  | 0.80 |
| -6 | 9  | 6  | 1.76  | 0.62 |
| -6 | -9 | -6 | 1.17  | 0.89 |
| -6 | -9 | -6 | 1.52  | 0.65 |
| -6 | 9  | 6  | 1.61  | 0.66 |
| -6 | 9  | -6 | 1.56  | 0.49 |
| -6 | -9 | 6  | 1.48  | 0.32 |
| -6 | 9  | -6 | 1.36  | 0.71 |
| -6 | -9 | 6  | 2.01  | 0.49 |
| -6 | -9 | 6  | 1.59  | 0.76 |
| -6 | 9  | -6 | 1.80  | 1.06 |
| -6 | -9 | 6  | 1.53  | 0.87 |
| -7 | -9 | -6 | 1.18  | 0.49 |
| -7 | 9  | 6  | 1.54  | 0.50 |
| -7 | -9 | -6 | 0.86  | 0.47 |
| -7 | 9  | 6  | 1.10  | 0.65 |
| 7  | -9 | 6  | 0.35  | 0.45 |
| -7 | -9 | -6 | -0.11 | 1.13 |
| -7 | 9  | 6  | 0.35  | 0.42 |
| -7 | 9  | 6  | 1.03  | 0.48 |
| -7 | 9  | 6  | 0.93  | 0.56 |
| -7 | -9 | -6 | 1.42  | 0.48 |
| -7 | 9  | 6  | 1.00  | 0.49 |
| -7 | 9  | -6 | 1.17  | 0.93 |
| -7 | -9 | 6  | 0.53  | 0.70 |
| -7 | 9  | -6 | 0.55  | 0.50 |
| -7 | 9  | -6 | 1.21  | 0.57 |
| -8 | 9  | 6  | 0.10  | 0.25 |
| -8 | 9  | 6  | 0.12  | 0.32 |
| 8  | -9 | 6  | 0.36  | 0.30 |

## CIF S3

|    |     |    |       |      |
|----|-----|----|-------|------|
| -8 | -9  | -6 | 0.61  | 0.41 |
| -8 | 9   | 6  | 0.00  | 0.29 |
| -8 | -9  | -6 | 0.05  | 0.28 |
| -8 | 9   | 6  | -0.04 | 0.33 |
| -8 | -9  | -6 | 0.36  | 0.33 |
| -8 | 9   | -6 | 0.58  | 0.61 |
| -8 | 9   | -6 | 0.48  | 0.43 |
| -8 | 9   | -6 | -0.06 | 0.34 |
| 0  | -10 | 6  | 77.10 | 4.05 |
| 0  | -10 | 6  | 78.38 | 4.12 |
| 0  | -10 | 6  | 81.89 | 4.11 |
| 0  | 10  | 6  | 78.31 | 4.14 |
| 1  | -10 | 6  | 11.96 | 1.26 |
| 1  | 10  | -6 | 10.53 | 1.36 |
| -1 | -10 | -6 | 9.42  | 1.25 |
| 1  | -10 | 6  | 13.22 | 1.15 |
| 1  | -10 | 6  | 12.03 | 1.26 |
| -1 | 10  | 6  | 12.57 | 1.16 |
| -1 | 10  | -6 | 11.48 | 1.45 |
| -1 | -10 | 6  | 13.11 | 1.23 |
| 1  | 10  | 6  | 11.58 | 1.15 |
| -1 | -10 | 6  | 11.11 | 1.15 |
| -1 | -10 | 6  | 14.46 | 1.13 |
| -1 | -10 | 6  | 13.62 | 1.22 |
| 1  | -10 | -6 | 10.78 | 1.35 |
| -2 | 10  | 6  | 0.34  | 0.68 |
| 2  | -10 | 6  | -0.49 | 0.91 |
| -2 | -10 | -6 | 0.39  | 0.92 |
| 2  | -10 | 6  | -0.03 | 0.82 |
| 2  | -10 | 6  | -0.35 | 0.81 |
| -2 | 10  | 6  | 0.82  | 1.08 |
| -2 | -10 | -6 | 0.99  | 0.93 |
| 2  | 10  | -6 | 0.45  | 1.50 |
| -2 | -10 | 6  | 0.56  | 0.64 |
| -2 | -10 | 6  | 0.23  | 0.87 |
| -2 | -10 | 6  | 0.99  | 0.82 |
| -2 | -10 | 6  | 0.54  | 0.44 |
| -2 | -10 | 6  | -0.11 | 0.77 |
| -3 | 10  | 6  | 22.99 | 1.62 |
| -3 | 10  | 6  | 23.57 | 1.51 |
| -3 | -10 | -6 | 22.93 | 1.66 |

## CIF S3

|    |     |    |       |      |
|----|-----|----|-------|------|
| -3 | -10 | -6 | 22.03 | 2.24 |
| 3  | -10 | 6  | 23.08 | 1.75 |
| -3 | -10 | -6 | 22.59 | 1.65 |
| -3 | 10  | 6  | 23.07 | 1.56 |
| -3 | -10 | -6 | 23.73 | 1.66 |
| 3  | -10 | 6  | 26.40 | 1.80 |
| -3 | -10 | -6 | 26.07 | 1.53 |
| -3 | 10  | 6  | 25.55 | 1.88 |
| -3 | -10 | -6 | 23.49 | 1.85 |
| 3  | -10 | 6  | 23.03 | 1.76 |
| -3 | 10  | 6  | 26.08 | 1.63 |
| -3 | -10 | 6  | 19.54 | 1.62 |
| -3 | -10 | 6  | 21.30 | 1.43 |
| -3 | -10 | 6  | 23.28 | 1.53 |
| -3 | -10 | 6  | 24.83 | 1.46 |
| -3 | 10  | -6 | 24.77 | 1.74 |
| -3 | -10 | 6  | 24.82 | 1.50 |
| -3 | 10  | -6 | 23.84 | 1.86 |
| 3  | -10 | -6 | 20.69 | 1.99 |
| -3 | -10 | 6  | 22.68 | 1.43 |
| -3 | -10 | 6  | 25.32 | 1.76 |
| -3 | -10 | 6  | 23.22 | 1.73 |
| -4 | -10 | -6 | 15.35 | 1.36 |
| -4 | -10 | -6 | 18.37 | 1.54 |
| -4 | 10  | 6  | 18.39 | 1.28 |
| -4 | 10  | 6  | 17.23 | 1.35 |
| 4  | -10 | 6  | 16.52 | 1.69 |
| -4 | 10  | 6  | 19.21 | 1.39 |
| -4 | -10 | -6 | 18.53 | 1.61 |
| -4 | -10 | -6 | 17.08 | 1.41 |
| -4 | -10 | -6 | 16.09 | 1.34 |
| -4 | -10 | -6 | 16.83 | 1.36 |
| -4 | 10  | 6  | 17.46 | 1.01 |
| -4 | 10  | 6  | 19.27 | 1.64 |
| -4 | -10 | -6 | 16.93 | 1.52 |
| -4 | -10 | 6  | 17.42 | 1.14 |
| -4 | -10 | 6  | 17.09 | 1.38 |
| 4  | -10 | -6 | 13.27 | 1.73 |
| -4 | 10  | -6 | 13.29 | 2.03 |
| -4 | -10 | 6  | 16.34 | 1.21 |
| -4 | -10 | 6  | 16.57 | 1.14 |

## CIF S3

|    |     |    |       |      |
|----|-----|----|-------|------|
| -4 | -10 | 6  | 15.94 | 1.15 |
| -4 | -10 | 6  | 18.24 | 1.42 |
| -4 | -10 | 6  | 19.08 | 1.44 |
| -5 | -10 | -6 | 14.71 | 1.42 |
| -5 | -10 | -6 | 13.16 | 1.21 |
| -5 | -10 | -6 | 13.76 | 1.19 |
| -5 | 10  | 6  | 14.22 | 1.12 |
| -5 | -10 | -6 | 9.60  | 1.22 |
| -5 | 10  | 6  | 14.26 | 1.53 |
| -5 | 10  | 6  | 13.07 | 1.20 |
| -5 | -10 | -6 | 14.97 | 1.18 |
| -5 | -10 | -6 | 13.90 | 1.43 |
| -5 | -10 | -6 | 14.39 | 0.95 |
| -5 | 10  | 6  | 13.91 | 1.25 |
| -5 | 10  | 6  | 13.14 | 1.18 |
| -5 | -10 | 6  | 12.37 | 0.95 |
| -5 | -10 | 6  | 11.08 | 1.23 |
| -5 | -10 | 6  | 15.65 | 1.45 |
| -5 | -10 | 6  | 12.58 | 0.95 |
| 5  | -10 | -6 | 11.58 | 1.92 |
| -5 | -10 | 6  | 13.76 | 0.89 |
| -5 | -10 | 6  | 13.28 | 0.87 |
| -6 | 10  | 6  | 0.45  | 0.49 |
| -6 | -10 | -6 | -0.42 | 0.55 |
| -6 | -10 | -6 | -0.13 | 0.57 |
| -6 | 10  | 6  | -0.13 | 0.58 |
| -6 | -10 | -6 | 0.58  | 0.87 |
| -6 | 10  | 6  | -0.27 | 0.69 |
| -6 | -10 | -6 | 0.26  | 0.56 |
| -6 | 10  | 6  | 0.65  | 0.55 |
| -6 | 10  | 6  | 0.49  | 0.52 |
| -6 | -10 | -6 | -0.40 | 0.59 |
| -6 | 10  | 6  | 0.07  | 0.52 |
| -6 | 10  | 6  | 0.22  | 0.57 |
| -6 | -10 | 6  | 1.78  | 0.43 |
| -6 | -10 | 6  | 0.27  | 0.33 |
| -6 | -10 | 6  | 0.45  | 0.78 |
| -6 | -10 | 6  | 0.55  | 0.68 |
| -6 | 10  | -6 | 0.42  | 0.61 |
| -6 | 10  | -6 | 1.22  | 0.91 |
| -6 | 10  | -6 | 0.24  | 0.41 |

## CIF S3

|    |     |    |       |      |
|----|-----|----|-------|------|
| -7 | 10  | 6  | 6.24  | 0.71 |
| -7 | 10  | 6  | 6.37  | 0.71 |
| -7 | 10  | 6  | 6.71  | 0.60 |
| -7 | -10 | -6 | 5.66  | 0.76 |
| -7 | -10 | -6 | 6.46  | 0.78 |
| -7 | 10  | 6  | 7.39  | 0.70 |
| -7 | 10  | 6  | 7.69  | 0.83 |
| -7 | 10  | -6 | 6.22  | 0.81 |
| -7 | 10  | -6 | 7.23  | 0.64 |
| -7 | -10 | 6  | 6.74  | 0.89 |
| 7  | -10 | -6 | 8.35  | 1.13 |
| -7 | 10  | -6 | 5.09  | 1.16 |
| 0  | -11 | 6  | 0.85  | 0.75 |
| 0  | -11 | -6 | 0.34  | 0.72 |
| 0  | 11  | 6  | 0.38  | 0.75 |
| 0  | 11  | 6  | 0.91  | 0.67 |
| 0  | -11 | 6  | 1.59  | 0.79 |
| 0  | -11 | -6 | 0.49  | 0.93 |
| 0  | -11 | 6  | 0.69  | 0.92 |
| 0  | -11 | 6  | -0.25 | 0.83 |
| 0  | -11 | 6  | -0.70 | 0.92 |
| 0  | -11 | 6  | 1.25  | 0.79 |
| 0  | -11 | -6 | -0.72 | 0.87 |
| 0  | -11 | 6  | -0.26 | 0.95 |
| 0  | -11 | 6  | -0.69 | 0.75 |
| 1  | -11 | 6  | 2.52  | 0.97 |
| -1 | -11 | -6 | 2.38  | 0.59 |
| -1 | 11  | 6  | 2.13  | 0.68 |
| -1 | -11 | -6 | 1.11  | 0.94 |
| -1 | 11  | 6  | 1.67  | 0.74 |
| 1  | -11 | 6  | 0.90  | 1.00 |
| 1  | -11 | 6  | 1.14  | 0.82 |
| 1  | -11 | 6  | 1.47  | 0.81 |
| 1  | -11 | 6  | 1.23  | 0.81 |
| 1  | -11 | 6  | 0.67  | 0.55 |
| 1  | -11 | 6  | 0.50  | 0.75 |
| 1  | -11 | 6  | 1.70  | 0.95 |
| -1 | -11 | -6 | 0.88  | 0.98 |
| -1 | -11 | -6 | 0.89  | 0.49 |
| -1 | -11 | 6  | 2.19  | 0.89 |
| -1 | -11 | 6  | 0.08  | 0.77 |

## CIF S3

|    |     |    |       |      |
|----|-----|----|-------|------|
| -1 | -11 | 6  | 2.20  | 0.74 |
| -1 | -11 | 6  | 2.70  | 0.89 |
| 1  | 11  | 6  | 2.25  | 0.82 |
| -1 | -11 | 6  | 1.94  | 0.64 |
| -1 | -11 | 6  | 3.31  | 0.93 |
| 1  | -11 | -6 | 2.60  | 0.78 |
| 1  | 11  | 6  | 1.47  | 0.63 |
| -1 | -11 | 6  | 1.06  | 0.66 |
| -1 | -11 | 6  | 0.61  | 0.73 |
| -1 | -11 | 6  | 3.37  | 1.03 |
| 1  | -11 | -6 | 2.50  | 0.96 |
| 1  | -11 | -6 | 1.19  | 0.63 |
| -2 | -11 | -6 | 1.55  | 0.94 |
| -2 | 11  | 6  | 2.03  | 0.63 |
| 2  | -11 | 6  | 0.59  | 0.85 |
| 2  | -11 | 6  | 2.51  | 0.87 |
| -2 | -11 | -6 | 2.61  | 0.92 |
| -2 | 11  | 6  | 1.36  | 0.77 |
| -2 | -11 | -6 | 0.86  | 0.53 |
| 2  | -11 | 6  | 1.88  | 0.94 |
| 2  | -11 | 6  | 1.41  | 0.52 |
| 2  | -11 | 6  | 2.00  | 0.84 |
| -2 | -11 | -6 | 2.72  | 0.88 |
| 2  | -11 | 6  | 2.52  | 1.02 |
| -2 | 11  | 6  | 3.00  | 1.08 |
| -2 | -11 | -6 | 2.20  | 0.89 |
| 2  | -11 | -6 | 2.31  | 0.76 |
| -2 | -11 | 6  | 2.82  | 0.79 |
| -2 | -11 | 6  | 2.26  | 0.92 |
| -2 | -11 | 6  | 3.04  | 0.92 |
| -2 | -11 | 6  | 3.27  | 0.88 |
| 2  | -11 | -6 | 2.77  | 1.23 |
| -2 | -11 | 6  | 1.61  | 0.68 |
| -2 | -11 | 6  | 1.70  | 0.71 |
| -2 | -11 | 6  | 3.06  | 0.75 |
| -2 | -11 | 6  | 3.41  | 0.86 |
| -3 | 11  | 6  | 8.26  | 1.55 |
| -3 | -11 | -6 | 11.74 | 1.24 |
| -3 | 11  | 6  | 10.81 | 1.19 |
| -3 | 11  | 6  | 9.44  | 0.97 |
| -3 | -11 | -6 | 13.06 | 1.30 |

## CIF S3

|    |     |    |       |      |
|----|-----|----|-------|------|
| -3 | -11 | -6 | 13.79 | 1.29 |
| -3 | -11 | -6 | 11.27 | 1.60 |
| -3 | 11  | 6  | 11.25 | 1.13 |
| 3  | -11 | 6  | 11.81 | 1.23 |
| -3 | -11 | 6  | 9.12  | 1.08 |
| -3 | -11 | 6  | 11.59 | 0.99 |
| -3 | -11 | 6  | 10.43 | 1.08 |
| -3 | -11 | 6  | 10.35 | 1.32 |
| 3  | -11 | -6 | 10.69 | 1.37 |
| -3 | -11 | 6  | 11.23 | 1.07 |
| -3 | -11 | 6  | 11.67 | 1.29 |
| -3 | -11 | 6  | 11.11 | 0.98 |
| -4 | -11 | -6 | 0.46  | 0.48 |
| -4 | -11 | -6 | 0.74  | 0.84 |
| -4 | -11 | -6 | 1.13  | 1.13 |
| -4 | -11 | -6 | 1.02  | 0.62 |
| -4 | 11  | 6  | 0.57  | 0.25 |
| -4 | 11  | 6  | 0.73  | 0.68 |
| -4 | 11  | 6  | 0.21  | 0.99 |
| -4 | -11 | -6 | -0.09 | 0.74 |
| -4 | 11  | 6  | 1.03  | 0.61 |
| -4 | 11  | 6  | 0.07  | 0.72 |
| -4 | -11 | -6 | 1.50  | 0.88 |
| -4 | -11 | -6 | -0.11 | 0.75 |
| -4 | -11 | -6 | 0.82  | 1.08 |
| -4 | -11 | 6  | -0.28 | 0.78 |
| -4 | -11 | 6  | 1.35  | 0.80 |
| -4 | -11 | 6  | 0.49  | 0.46 |
| -4 | -11 | 6  | 1.07  | 0.47 |
| -4 | -11 | 6  | -0.13 | 0.66 |
| -4 | -11 | 6  | 0.07  | 0.50 |
| 4  | -11 | -6 | 1.03  | 0.78 |
| -4 | -11 | 6  | 1.38  | 0.73 |
| -5 | 11  | 6  | 0.87  | 0.55 |
| -5 | 11  | 6  | 1.56  | 0.87 |
| -5 | -11 | -6 | 1.37  | 0.68 |
| -5 | -11 | -6 | 1.92  | 0.67 |
| -5 | 11  | 6  | 1.16  | 0.58 |
| -5 | -11 | -6 | 0.59  | 0.47 |
| -5 | -11 | -6 | 0.51  | 0.67 |
| -5 | 11  | 6  | 2.04  | 0.67 |

## CIF S3

|    |     |    |       |      |
|----|-----|----|-------|------|
| -5 | -11 | -6 | 1.04  | 0.65 |
| -5 | -11 | -6 | 0.60  | 0.80 |
| -5 | -11 | 6  | 2.01  | 0.45 |
| -5 | -11 | 6  | 0.70  | 0.81 |
| -5 | -11 | 6  | 1.25  | 0.38 |
| 5  | -11 | -6 | 1.07  | 0.76 |
| -5 | -11 | 6  | 1.25  | 0.41 |
| -5 | -11 | 6  | 0.88  | 0.63 |
| -6 | 11  | 6  | -0.10 | 0.51 |
| -6 | 11  | 6  | 0.09  | 0.56 |
| -6 | 11  | 6  | 0.27  | 0.49 |
| -6 | 11  | 6  | 0.26  | 0.39 |
| -6 | -11 | -6 | -0.24 | 0.54 |
| -6 | 11  | 6  | 0.19  | 0.47 |
| -6 | -11 | -6 | 0.13  | 0.52 |
| -6 | -11 | -6 | 0.27  | 0.39 |
| -6 | -11 | -6 | -0.24 | 0.50 |
| -6 | 11  | 6  | 0.22  | 0.45 |
| -6 | -11 | 6  | -0.01 | 0.25 |
| -6 | -11 | 6  | 0.44  | 0.63 |
| 6  | -11 | -6 | 1.07  | 0.64 |
| -6 | 11  | -6 | 0.19  | 0.32 |
| -6 | 11  | -6 | -0.67 | 0.79 |
| -6 | -11 | 6  | 0.07  | 0.31 |
| -7 | -11 | -6 | -0.27 | 0.28 |
| -7 | 11  | 6  | 0.17  | 0.37 |
| -7 | -11 | -6 | -0.12 | 0.27 |
| -7 | -11 | -6 | 0.06  | 0.30 |
| -7 | 11  | 6  | 0.42  | 0.34 |
| -7 | 11  | 6  | 0.25  | 0.33 |
| -7 | -11 | -6 | 0.34  | 0.38 |
| -7 | 11  | 6  | -0.07 | 0.30 |
| -7 | 11  | 6  | -0.11 | 0.31 |
| -7 | 11  | -6 | -0.68 | 0.56 |
| 7  | -11 | -6 | -0.30 | 0.43 |
| -7 | 11  | -6 | -0.13 | 0.38 |
| -7 | 11  | -6 | -0.15 | 0.29 |
| 0  | -12 | 6  | 10.93 | 1.17 |
| 0  | -12 | -6 | 11.68 | 0.90 |
| 0  | -12 | 6  | 13.67 | 1.18 |
| 0  | -12 | 6  | 11.43 | 1.36 |



## CIF S3

|    |     |    |       |      |
|----|-----|----|-------|------|
| 0  | -12 | 6  | 11.34 | 1.16 |
| 0  | -12 | 6  | 12.11 | 1.31 |
| 0  | -12 | 6  | 11.03 | 1.17 |
| 0  | -12 | 6  | 11.95 | 1.61 |
| 0  | 12  | 6  | 11.32 | 1.10 |
| 0  | -12 | -6 | 11.15 | 1.32 |
| 1  | -12 | 6  | 5.13  | 1.02 |
| -1 | -12 | -6 | 5.07  | 1.14 |
| 1  | -12 | 6  | 5.29  | 1.18 |
| -1 | 12  | 6  | 5.16  | 0.90 |
| 1  | -12 | 6  | 3.78  | 1.46 |
| 1  | -12 | 6  | 4.03  | 0.81 |
| -1 | -12 | -6 | 3.26  | 1.06 |
| 1  | -12 | 6  | 4.01  | 0.84 |
| 1  | -12 | 6  | 2.89  | 0.91 |
| 1  | -12 | 6  | 3.67  | 0.85 |
| 1  | -12 | -6 | 2.67  | 0.87 |
| -1 | -12 | 6  | 2.48  | 0.91 |
| -1 | -12 | 6  | 3.38  | 0.95 |
| -1 | -12 | 6  | 4.47  | 1.04 |
| -1 | -12 | 6  | 4.29  | 1.02 |
| -1 | -12 | 6  | 3.39  | 0.87 |
| -1 | -12 | 6  | 4.54  | 0.78 |
| 1  | -12 | -6 | 4.06  | 0.99 |
| -1 | -12 | 6  | 4.36  | 1.06 |
| -1 | -12 | 6  | 3.02  | 0.69 |
| -2 | 12  | 6  | 0.16  | 1.07 |
| -2 | -12 | -6 | 0.88  | 0.81 |
| 2  | -12 | 6  | 0.30  | 0.89 |
| -2 | -12 | -6 | 0.35  | 0.48 |
| 2  | -12 | 6  | 0.16  | 0.43 |
| -2 | -12 | -6 | 0.39  | 0.75 |
| 2  | -12 | 6  | -0.41 | 0.84 |
| 2  | -12 | 6  | -0.40 | 0.74 |
| 2  | -12 | 6  | 0.46  | 0.82 |
| -2 | -12 | -6 | 0.75  | 0.98 |
| -2 | 12  | 6  | 0.18  | 0.64 |
| -2 | -12 | 6  | 0.47  | 0.66 |
| -2 | -12 | 6  | 0.41  | 0.64 |
| -2 | -12 | 6  | 0.27  | 0.75 |
| -2 | -12 | 6  | 0.73  | 0.81 |

## CIF S3

|    |     |    |       |      |
|----|-----|----|-------|------|
| -2 | -12 | 6  | 0.97  | 0.59 |
| 2  | -12 | -6 | 0.32  | 0.76 |
| 2  | -12 | -6 | 1.84  | 0.82 |
| -2 | -12 | 6  | 0.33  | 0.61 |
| -2 | -12 | 6  | 0.53  | 0.61 |
| -3 | 12  | 6  | 1.77  | 0.44 |
| -3 | 12  | 6  | -0.28 | 0.97 |
| -3 | -12 | -6 | 0.75  | 0.48 |
| -3 | 12  | 6  | 1.54  | 0.73 |
| -3 | -12 | -6 | 0.25  | 0.79 |
| -3 | -12 | -6 | 0.59  | 0.67 |
| 3  | -12 | 6  | 2.37  | 0.88 |
| -3 | -12 | -6 | 0.91  | 0.82 |
| 3  | -12 | 6  | 1.33  | 0.82 |
| -3 | 12  | 6  | 1.46  | 0.61 |
| -3 | -12 | -6 | 1.48  | 0.65 |
| 3  | -12 | 6  | 1.25  | 0.84 |
| -3 | -12 | 6  | 1.48  | 0.77 |
| -3 | -12 | 6  | 0.59  | 0.53 |
| 3  | -12 | -6 | 1.06  | 0.55 |
| 3  | -12 | -6 | 1.41  | 0.79 |
| -3 | -12 | 6  | 1.53  | 0.54 |
| -3 | -12 | 6  | 2.06  | 0.87 |
| -3 | -12 | 6  | 1.34  | 0.52 |
| -4 | 12  | 6  | 0.87  | 0.71 |
| 4  | -12 | 6  | 1.80  | 0.73 |
| -4 | -12 | -6 | 1.74  | 0.51 |
| -4 | 12  | 6  | 1.45  | 0.56 |
| -4 | -12 | -6 | 0.71  | 0.45 |
| -4 | -12 | -6 | 0.79  | 0.67 |
| -4 | 12  | 6  | 1.32  | 0.92 |
| -4 | -12 | -6 | 1.04  | 0.61 |
| -4 | 12  | 6  | 0.64  | 0.60 |
| -4 | -12 | -6 | 3.74  | 0.97 |
| -4 | -12 | 6  | 1.69  | 0.95 |
| -4 | -12 | 6  | 1.20  | 0.45 |
| -4 | -12 | 6  | 0.98  | 0.38 |
| 4  | -12 | -6 | 1.51  | 0.59 |
| -4 | -12 | 6  | 1.62  | 0.49 |
| -4 | -12 | 6  | 1.31  | 0.58 |
| -5 | -12 | -6 | 0.50  | 0.59 |

## CIF S3

|    |     |    |       |      |
|----|-----|----|-------|------|
| -5 | -12 | -6 | -0.37 | 0.53 |
| -5 | -12 | -6 | 0.66  | 0.54 |
| -5 | 12  | 6  | 0.32  | 0.44 |
| -5 | -12 | -6 | 0.27  | 0.39 |
| -5 | 12  | 6  | 0.61  | 0.55 |
| -5 | 12  | 6  | 0.25  | 0.39 |
| -5 | 12  | 6  | 0.37  | 0.68 |
| -5 | 12  | -6 | 0.36  | 0.40 |
| -5 | -12 | 6  | 0.49  | 0.36 |
| -5 | -12 | 6  | -0.18 | 0.55 |
| 5  | -12 | -6 | -0.04 | 0.54 |
| -5 | -12 | 6  | 0.54  | 0.34 |
| -6 | 12  | 6  | 2.78  | 0.52 |
| -6 | -12 | -6 | 3.66  | 0.87 |
| -6 | -12 | -6 | 1.45  | 0.42 |
| -6 | 12  | 6  | 3.03  | 0.59 |
| -6 | -12 | -6 | 2.40  | 0.53 |
| -6 | 12  | 6  | 2.93  | 0.45 |
| -6 | 12  | 6  | 1.73  | 0.48 |
| -6 | 12  | 6  | 2.17  | 0.59 |
| -6 | 12  | 6  | 2.33  | 0.58 |
| -6 | -12 | -6 | 1.79  | 0.39 |
| -6 | -12 | 6  | 2.52  | 0.29 |
| 6  | -12 | -6 | 3.20  | 0.59 |
| -6 | -12 | 6  | 1.82  | 0.27 |
| -6 | 12  | -6 | 1.44  | 0.63 |
| -6 | -12 | 6  | 3.32  | 0.30 |
| 0  | -13 | 6  | 0.58  | 0.67 |
| 0  | -13 | -6 | 0.39  | 0.75 |
| 0  | -13 | 6  | 0.11  | 0.70 |
| 0  | -13 | 6  | 0.02  | 0.46 |
| 0  | -13 | 6  | 0.15  | 0.57 |
| 0  | -13 | 6  | -0.21 | 0.81 |
| 0  | -13 | 6  | -0.36 | 0.64 |
| -1 | -13 | -6 | 3.21  | 0.80 |
| 1  | -13 | 6  | 2.25  | 0.77 |
| 1  | -13 | 6  | 2.35  | 0.83 |
| -1 | 13  | 6  | 3.30  | 0.84 |
| 1  | -13 | 6  | 4.21  | 0.91 |
| 1  | -13 | 6  | 3.62  | 1.22 |
| 1  | -13 | 6  | 4.76  | 0.95 |

## CIF S3

|    |     |    |       |      |
|----|-----|----|-------|------|
| 1  | -13 | 6  | 3.51  | 0.92 |
| 1  | -13 | -6 | 3.01  | 0.81 |
| -1 | -13 | 6  | 4.00  | 0.84 |
| -1 | -13 | 6  | 3.67  | 0.70 |
| -1 | -13 | 6  | 5.00  | 0.85 |
| -1 | -13 | 6  | 3.43  | 0.92 |
| -1 | -13 | 6  | 3.39  | 0.65 |
| -1 | -13 | 6  | 0.94  | 0.73 |
| -1 | -13 | 6  | 3.87  | 1.35 |
| 2  | -13 | 6  | 1.64  | 0.89 |
| -2 | 13  | 6  | 2.71  | 0.59 |
| 2  | -13 | 6  | 2.00  | 0.75 |
| -2 | -13 | -6 | 1.40  | 0.74 |
| -2 | -13 | -6 | 2.72  | 1.00 |
| 2  | -13 | 6  | 3.43  | 0.86 |
| 2  | -13 | 6  | 1.73  | 0.76 |
| -2 | 13  | 6  | 1.80  | 1.17 |
| -2 | 13  | 6  | 2.44  | 0.63 |
| -2 | -13 | -6 | 1.99  | 0.74 |
| -2 | -13 | -6 | 1.87  | 1.01 |
| 2  | -13 | 6  | 1.33  | 1.04 |
| -2 | -13 | -6 | 2.74  | 0.75 |
| -2 | -13 | 6  | 1.75  | 0.54 |
| -2 | -13 | 6  | 3.16  | 0.83 |
| 2  | -13 | -6 | 2.13  | 0.56 |
| -2 | -13 | 6  | 3.42  | 0.84 |
| -2 | -13 | 6  | 1.59  | 0.54 |
| -2 | -13 | 6  | 2.00  | 0.58 |
| -3 | 13  | 6  | -0.08 | 0.29 |
| -3 | -13 | -6 | 0.10  | 0.53 |
| -3 | 13  | 6  | -0.25 | 0.83 |
| -3 | -13 | -6 | -0.28 | 0.62 |
| -3 | -13 | -6 | -0.15 | 0.59 |
| 3  | -13 | 6  | -0.16 | 0.70 |
| -3 | -13 | -6 | 0.10  | 0.37 |
| 3  | -13 | 6  | -0.04 | 0.81 |
| -3 | 13  | 6  | -0.17 | 0.50 |
| -3 | -13 | -6 | 1.06  | 0.66 |
| -3 | -13 | 6  | 0.27  | 0.48 |
| 3  | -13 | -6 | 0.21  | 0.60 |
| -3 | -13 | 6  | -0.14 | 0.72 |

## CIF S3

|    |     |    |       |      |
|----|-----|----|-------|------|
| -3 | -13 | 6  | 0.33  | 0.45 |
| -4 | 13  | 6  | 0.63  | 0.56 |
| -4 | -13 | -6 | 0.04  | 0.35 |
| -4 | -13 | -6 | 0.68  | 0.53 |
| -4 | 13  | 6  | 0.31  | 0.71 |
| -4 | 13  | 6  | 0.69  | 0.45 |
| -4 | -13 | -6 | -0.14 | 0.52 |
| -4 | -13 | 6  | 0.62  | 0.32 |
| -4 | -13 | 6  | 0.36  | 0.41 |
| 4  | -13 | -6 | 1.22  | 0.58 |
| -5 | 13  | 6  | 2.22  | 0.65 |
| -5 | -13 | -6 | 2.79  | 0.81 |
| -5 | 13  | 6  | 3.25  | 0.48 |
| -5 | -13 | -6 | 2.52  | 0.55 |
| -5 | -13 | -6 | 2.67  | 0.58 |
| -5 | 13  | 6  | 3.12  | 0.48 |
| -5 | 13  | 6  | 2.31  | 0.60 |
| -5 | -13 | -6 | 2.86  | 0.60 |
| -5 | 13  | -6 | 3.21  | 0.39 |
| -5 | -13 | 6  | 2.88  | 0.42 |
| 0  | -14 | -6 | 2.03  | 0.68 |
| 0  | -14 | 6  | 2.04  | 0.99 |
| 0  | -14 | 6  | 1.24  | 0.52 |
| 0  | -14 | 6  | 1.77  | 0.60 |
| 0  | -14 | -6 | 0.61  | 0.80 |
| 0  | -14 | 6  | 2.90  | 0.88 |
| 1  | -14 | 6  | 1.51  | 0.53 |
| 1  | -14 | 6  | 1.37  | 0.69 |
| 1  | -14 | 6  | 0.55  | 0.61 |
| -1 | -14 | -6 | -0.10 | 0.79 |
| 1  | -14 | 6  | 0.92  | 0.46 |
| -1 | -14 | -6 | 1.69  | 0.72 |
| -1 | -14 | 6  | 0.95  | 0.46 |
| -1 | -14 | 6  | 1.89  | 0.70 |
| -1 | -14 | 6  | 2.29  | 1.13 |
| -1 | -14 | 6  | 1.41  | 0.56 |
| -1 | -14 | 6  | 1.05  | 0.51 |
| -1 | -14 | 6  | 0.61  | 0.50 |
| 1  | -14 | -6 | -0.79 | 0.76 |
| -2 | 14  | 6  | -1.70 | 1.20 |
| -2 | 14  | 6  | 0.77  | 0.62 |

## CIF S3

|    |     |    |       |      |
|----|-----|----|-------|------|
| 2  | -14 | 6  | 0.51  | 0.52 |
| -2 | -14 | -6 | 0.38  | 0.66 |
| -2 | -14 | -6 | 0.15  | 0.59 |
| 2  | -14 | 6  | 0.27  | 0.51 |
| 2  | -14 | 6  | 0.22  | 0.71 |
| -2 | -14 | -6 | 0.48  | 0.51 |
| -2 | 14  | 6  | 0.00  | 0.31 |
| 2  | -14 | 6  | -0.29 | 0.60 |
| -2 | -14 | 6  | 0.06  | 0.40 |
| 2  | -14 | -6 | -0.34 | 0.76 |
| -2 | -14 | 6  | 0.75  | 0.42 |
| -2 | -14 | 6  | -0.27 | 0.42 |
| -2 | -14 | 6  | 0.55  | 0.45 |
| -3 | 14  | 6  | -0.33 | 0.61 |
| 3  | -14 | 6  | 0.13  | 0.62 |
| -3 | -14 | -6 | 0.08  | 0.43 |
| 3  | -14 | 6  | 0.86  | 0.56 |
| -3 | 14  | 6  | 0.38  | 0.35 |
| -3 | -14 | 6  | 0.28  | 0.30 |
| -3 | -14 | 6  | 0.33  | 0.39 |
| -3 | -14 | 6  | -0.51 | 0.40 |
| -3 | -14 | 6  | 0.31  | 0.33 |
| 0  | -15 | 6  | -0.50 | 0.50 |
| 0  | -15 | -6 | 0.71  | 0.56 |
| 0  | -15 | 6  | 0.00  | 0.36 |
| 0  | 0   | -7 | 0.03  | 0.58 |
| 0  | 0   | 7  | 0.74  | 0.58 |
| 0  | 0   | -7 | 0.00  | 0.62 |
| 0  | 0   | 7  | -0.16 | 0.65 |
| 0  | 0   | -7 | 0.18  | 0.61 |
| 0  | 0   | -7 | -0.10 | 0.45 |
| 1  | 0   | -7 | 92.30 | 4.47 |
| 1  | 0   | 7  | 86.27 | 4.83 |
| -1 | 0   | 7  | 93.05 | 4.65 |
| 1  | 0   | -7 | 94.21 | 4.53 |
| 1  | 0   | 7  | 77.75 | 4.85 |
| -1 | 0   | -7 | 81.82 | 4.79 |
| -1 | 0   | -7 | 86.26 | 4.49 |
| -1 | 0   | -7 | 95.99 | 4.91 |
| 1  | 0   | -7 | 86.68 | 4.41 |
| -1 | 0   | -7 | 92.08 | 4.79 |

## CIF S3

|    |   |    |       |      |
|----|---|----|-------|------|
| 1  | 0 | -7 | 96.64 | 4.69 |
| 1  | 0 | -7 | 90.49 | 4.75 |
| -1 | 0 | -7 | 87.50 | 4.58 |
| -1 | 0 | -7 | 83.55 | 4.50 |
| 2  | 0 | -7 | 84.52 | 4.38 |
| -2 | 0 | -7 | 91.99 | 4.83 |
| -2 | 0 | -7 | 82.15 | 4.77 |
| 2  | 0 | 7  | 81.43 | 4.79 |
| 2  | 0 | 7  | 88.75 | 4.91 |
| -2 | 0 | 7  | 90.09 | 4.49 |
| 2  | 0 | -7 | 87.67 | 4.35 |
| 2  | 0 | -7 | 91.46 | 4.29 |
| -2 | 0 | -7 | 84.53 | 4.43 |
| -2 | 0 | -7 | 79.31 | 4.42 |
| 2  | 0 | -7 | 88.35 | 4.50 |
| 3  | 0 | 7  | 4.77  | 1.32 |
| -3 | 0 | -7 | 5.68  | 0.68 |
| -3 | 0 | -7 | 5.62  | 0.87 |
| 3  | 0 | 7  | 4.33  | 1.26 |
| -3 | 0 | 7  | 5.23  | 0.74 |
| -3 | 0 | 7  | 5.92  | 0.43 |
| 3  | 0 | -7 | 6.78  | 0.66 |
| -3 | 0 | -7 | 5.87  | 0.90 |
| 3  | 0 | -7 | 6.82  | 0.59 |
| 3  | 0 | -7 | 6.91  | 0.48 |
| -3 | 0 | -7 | 5.98  | 1.23 |
| 3  | 0 | 7  | 6.03  | 0.65 |
| 3  | 0 | -7 | 6.84  | 0.52 |
| -3 | 0 | 7  | 5.63  | 0.39 |
| 3  | 0 | 7  | 6.44  | 0.78 |
| -4 | 0 | 7  | 73.54 | 3.95 |
| 4  | 0 | -7 | 80.79 | 3.90 |
| 4  | 0 | 7  | 84.69 | 4.85 |
| -4 | 0 | -7 | 77.32 | 4.07 |
| 4  | 0 | -7 | 78.37 | 3.92 |
| 4  | 0 | 7  | 78.41 | 4.09 |
| -4 | 0 | -7 | 77.77 | 4.18 |
| -4 | 0 | 7  | 80.92 | 3.87 |
| -4 | 0 | 7  | 79.05 | 4.09 |
| -5 | 0 | 7  | 4.02  | 0.36 |
| 5  | 0 | 7  | 4.76  | 0.82 |

## CIF S3

|     |    |    |       |      |
|-----|----|----|-------|------|
| 5   | 0  | -7 | 4.07  | 0.40 |
| -5  | 0  | -7 | 3.39  | 0.80 |
| -5  | 0  | -7 | 4.91  | 1.07 |
| 5   | 0  | -7 | 4.07  | 0.40 |
| 6   | 0  | -7 | 2.73  | 0.40 |
| -6  | 0  | -7 | 2.85  | 0.85 |
| -6  | 0  | 7  | 2.33  | 0.34 |
| 6   | 0  | 7  | 2.64  | 0.74 |
| -6  | 0  | -7 | 1.48  | 0.90 |
| -6  | 0  | -7 | 1.64  | 0.55 |
| -6  | 0  | -7 | 3.13  | 0.57 |
| 6   | 0  | -7 | 2.66  | 0.40 |
| -7  | 0  | 7  | 33.76 | 1.78 |
| -7  | 0  | -7 | 35.66 | 2.03 |
| 7   | 0  | 7  | 32.54 | 2.18 |
| -7  | 0  | -7 | 39.41 | 1.97 |
| -8  | 0  | -7 | 11.81 | 0.92 |
| -8  | 0  | -7 | 11.74 | 0.99 |
| -8  | 0  | -7 | 11.38 | 1.06 |
| -8  | 0  | -7 | 10.86 | 1.42 |
| -8  | 0  | -7 | 11.88 | 1.00 |
| -8  | 0  | -7 | 12.06 | 0.97 |
| -8  | 0  | -7 | 11.63 | 1.05 |
| -9  | 0  | -7 | 0.73  | 0.39 |
| -9  | 0  | -7 | 0.11  | 0.83 |
| -9  | 0  | -7 | 0.56  | 0.39 |
| -9  | 0  | -7 | -0.12 | 0.38 |
| -9  | 0  | -7 | 0.74  | 0.44 |
| -9  | 0  | -7 | 0.24  | 0.42 |
| -10 | 0  | -7 | 0.49  | 0.29 |
| -10 | 0  | -7 | 0.11  | 0.24 |
| -10 | 0  | -7 | 0.11  | 0.27 |
| 0   | 1  | -7 | 7.60  | 0.85 |
| 0   | 1  | -7 | 7.86  | 1.04 |
| 0   | 1  | 7  | 8.86  | 1.10 |
| 0   | -1 | 7  | 9.33  | 1.03 |
| 0   | -1 | -7 | 8.73  | 1.14 |
| 0   | -1 | -7 | 8.83  | 0.96 |
| 0   | -1 | 7  | 9.94  | 1.26 |
| 0   | 1  | -7 | 8.27  | 1.00 |
| 0   | 1  | -7 | 7.61  | 0.80 |



## CIF S3

|    |    |    |        |      |
|----|----|----|--------|------|
| 0  | 1  | -7 | 8.28   | 1.09 |
| 0  | -1 | -7 | 8.58   | 1.14 |
| 0  | 1  | 7  | 8.65   | 1.23 |
| 0  | -1 | -7 | 8.20   | 0.88 |
| -1 | -1 | -7 | 19.94  | 1.49 |
| -1 | -1 | -7 | 24.30  | 1.40 |
| -1 | -1 | -7 | 20.43  | 1.41 |
| 1  | 1  | -7 | 21.77  | 1.32 |
| 1  | -1 | 7  | 23.24  | 1.81 |
| -1 | -1 | -7 | 18.79  | 1.67 |
| -1 | 1  | 7  | 21.60  | 1.48 |
| 1  | 1  | -7 | 23.97  | 1.26 |
| 1  | 1  | -7 | 23.09  | 1.36 |
| 1  | -1 | 7  | 23.26  | 1.81 |
| 1  | 1  | -7 | 23.11  | 1.56 |
| -1 | 1  | 7  | 24.93  | 1.61 |
| -1 | -1 | -7 | 24.58  | 1.81 |
| 1  | 1  | -7 | 22.98  | 1.62 |
| -1 | 1  | -7 | 24.46  | 1.70 |
| 1  | 1  | 7  | 18.45  | 1.89 |
| 1  | -1 | -7 | 23.19  | 1.68 |
| -1 | 1  | -7 | 24.86  | 1.78 |
| 1  | 1  | 7  | 23.44  | 1.83 |
| -1 | 1  | -7 | 21.91  | 1.39 |
| -1 | 1  | -7 | 25.80  | 1.81 |
| 1  | -1 | -7 | 23.23  | 1.47 |
| -1 | -1 | 7  | 22.75  | 1.54 |
| -1 | 1  | -7 | 22.72  | 1.38 |
| -1 | 1  | -7 | 22.32  | 1.46 |
| 1  | -1 | -7 | 20.93  | 1.34 |
| 1  | -1 | -7 | 25.64  | 1.69 |
| -2 | -1 | -7 | 92.73  | 4.65 |
| -2 | 1  | 7  | 88.58  | 4.60 |
| 2  | 1  | -7 | 88.92  | 4.54 |
| -2 | -1 | -7 | 101.34 | 5.07 |
| 2  | 1  | -7 | 90.53  | 4.49 |
| 2  | -1 | 7  | 87.27  | 5.02 |
| -2 | -1 | -7 | 95.92  | 5.06 |
| 2  | -1 | 7  | 100.26 | 5.14 |
| 2  | 1  | -7 | 94.30  | 4.70 |
| 2  | 1  | -7 | 89.77  | 4.56 |

## CIF S3

|    |    |    |        |      |
|----|----|----|--------|------|
| -2 | 1  | 7  | 90.04  | 4.73 |
| 2  | 1  | 7  | 94.80  | 4.61 |
| 2  | -1 | -7 | 92.16  | 4.57 |
| -2 | 1  | -7 | 79.10  | 4.62 |
| 2  | -1 | -7 | 94.02  | 4.64 |
| 2  | -1 | -7 | 85.20  | 4.79 |
| -2 | -1 | 7  | 91.21  | 4.49 |
| -2 | -1 | 7  | 96.92  | 4.69 |
| 2  | 1  | 7  | 95.45  | 5.10 |
| -2 | 1  | -7 | 88.08  | 5.03 |
| 2  | 1  | 7  | 86.65  | 5.12 |
| 2  | -1 | -7 | 88.68  | 4.56 |
| -2 | 1  | -7 | 86.78  | 4.99 |
| -2 | 1  | -7 | 92.58  | 4.64 |
| 2  | -1 | -7 | 85.07  | 4.51 |
| 3  | -1 | 7  | 116.94 | 6.80 |
| -3 | -1 | -7 | 133.77 | 6.33 |
| -3 | 1  | 7  | 116.70 | 6.15 |
| 3  | -1 | 7  | 129.62 | 6.88 |
| 3  | 1  | -7 | 126.00 | 6.19 |
| 3  | 1  | -7 | 123.21 | 6.24 |
| 3  | -1 | 7  | 121.17 | 6.32 |
| 3  | 1  | -7 | 131.75 | 6.16 |
| -3 | 1  | 7  | 126.23 | 6.26 |
| -3 | 1  | 7  | 120.82 | 6.39 |
| -3 | -1 | -7 | 133.65 | 6.82 |
| 3  | -1 | 7  | 116.94 | 6.25 |
| -3 | -1 | -7 | 131.31 | 6.39 |
| -3 | 1  | 7  | 121.98 | 6.15 |
| 3  | 1  | 7  | 123.14 | 6.23 |
| -3 | -1 | 7  | 124.16 | 6.12 |
| -3 | 1  | -7 | 115.57 | 6.76 |
| 3  | -1 | -7 | 135.79 | 6.27 |
| -3 | -1 | 7  | 124.01 | 6.28 |
| 3  | -1 | -7 | 129.74 | 6.24 |
| -3 | 1  | -7 | 128.93 | 6.38 |
| 3  | -1 | -7 | 130.57 | 6.20 |
| -3 | 1  | -7 | 122.32 | 6.91 |
| -3 | 1  | -7 | 116.04 | 6.29 |
| -3 | -1 | 7  | 128.67 | 6.14 |
| 3  | -1 | -7 | 128.58 | 6.31 |

## CIF S3

|    |    |    |        |      |
|----|----|----|--------|------|
| 3  | 1  | 7  | 131.97 | 6.34 |
| 3  | 1  | 7  | 133.54 | 6.99 |
| 3  | 1  | 7  | 134.41 | 6.90 |
| -3 | -1 | 7  | 125.78 | 6.28 |
| -3 | 1  | -7 | 123.81 | 6.26 |
| -3 | -1 | 7  | 123.97 | 6.15 |
| 4  | 1  | -7 | 9.78   | 0.57 |
| 4  | -1 | 7  | 9.22   | 0.88 |
| 4  | 1  | -7 | 9.72   | 0.55 |
| -4 | -1 | -7 | 10.14  | 0.96 |
| -4 | -1 | -7 | 8.17   | 1.12 |
| -4 | 1  | 7  | 9.24   | 0.61 |
| -4 | 1  | 7  | 8.67   | 0.65 |
| 4  | -1 | -7 | 11.42  | 1.05 |
| -4 | 1  | -7 | 10.14  | 1.23 |
| 4  | 1  | 7  | 10.15  | 0.88 |
| 4  | 1  | 7  | 10.82  | 1.70 |
| -4 | -1 | 7  | 9.70   | 0.54 |
| 4  | -1 | -7 | 10.20  | 0.68 |
| -4 | 1  | -7 | 9.86   | 0.99 |
| 4  | -1 | -7 | 10.34  | 0.90 |
| -4 | 1  | -7 | 8.48   | 0.83 |
| 4  | -1 | -7 | 9.52   | 0.70 |
| -5 | 1  | 7  | 9.06   | 0.93 |
| -5 | -1 | -7 | 8.08   | 1.02 |
| -5 | 1  | 7  | 10.86  | 0.65 |
| -5 | -1 | -7 | 8.36   | 1.14 |
| -5 | 1  | 7  | 10.13  | 0.69 |
| 5  | -1 | 7  | 11.04  | 1.04 |
| -5 | -1 | -7 | 9.46   | 1.22 |
| 5  | 1  | -7 | 10.51  | 0.59 |
| 5  | 1  | -7 | 10.58  | 0.60 |
| -5 | -1 | -7 | 10.40  | 1.04 |
| 5  | -1 | -7 | 10.98  | 0.74 |
| -5 | -1 | 7  | 10.78  | 0.57 |
| -5 | 1  | -7 | 10.90  | 1.23 |
| 5  | -1 | -7 | 11.15  | 0.73 |
| -5 | 1  | -7 | 10.32  | 1.04 |
| 5  | 1  | 7  | 11.60  | 0.98 |
| -6 | -1 | -7 | 5.28   | 0.73 |
| -6 | 1  | 7  | 5.67   | 0.49 |

## CIF S3

|    |    |    |       |      |
|----|----|----|-------|------|
| 6  | -1 | 7  | 5.43  | 0.93 |
| 6  | 1  | -7 | 5.55  | 0.40 |
| -6 | -1 | -7 | 5.29  | 0.68 |
| 6  | 1  | -7 | 6.16  | 0.41 |
| 6  | -1 | -7 | 4.67  | 0.57 |
| -6 | 1  | -7 | 6.39  | 1.32 |
| -6 | 1  | -7 | 4.96  | 0.82 |
| -6 | -1 | 7  | 5.58  | 0.37 |
| 6  | -1 | -7 | 6.02  | 0.58 |
| -6 | 1  | -7 | 6.47  | 0.89 |
| 6  | 1  | 7  | 5.40  | 0.90 |
| -7 | -1 | -7 | 2.90  | 0.65 |
| -7 | 1  | 7  | 1.97  | 0.43 |
| -7 | -1 | -7 | 2.29  | 0.64 |
| -7 | -1 | -7 | 1.45  | 0.55 |
| 7  | -1 | 7  | 3.22  | 0.90 |
| -7 | 1  | -7 | 2.72  | 0.59 |
| 7  | 1  | 7  | 0.32  | 0.68 |
| -7 | 1  | -7 | 3.40  | 0.71 |
| -8 | -1 | -7 | 0.60  | 0.54 |
| -8 | 1  | 7  | 0.34  | 0.19 |
| -8 | 1  | 7  | 0.31  | 0.17 |
| -8 | -1 | -7 | 0.11  | 0.87 |
| -8 | 1  | 7  | 0.42  | 0.15 |
| -8 | -1 | -7 | 0.92  | 0.47 |
| -8 | -1 | -7 | 0.27  | 0.44 |
| -8 | -1 | -7 | 0.28  | 0.44 |
| -8 | -1 | -7 | 0.93  | 0.51 |
| -8 | -1 | -7 | -0.30 | 0.55 |
| -8 | -1 | -7 | 1.51  | 1.29 |
| -8 | 1  | -7 | 0.33  | 0.63 |
| -8 | 1  | -7 | 0.90  | 0.52 |
| -8 | 1  | -7 | 1.02  | 0.46 |
| -8 | 1  | -7 | 0.70  | 0.92 |
| -8 | 1  | -7 | 0.09  | 0.53 |
| -8 | 1  | -7 | 0.64  | 0.50 |
| -8 | 1  | -7 | 0.87  | 0.51 |
| -9 | -1 | -7 | 1.82  | 0.45 |
| -9 | -1 | -7 | 1.24  | 0.40 |
| -9 | -1 | -7 | 1.23  | 0.43 |
| -9 | -1 | -7 | 0.47  | 0.75 |

## CIF S3

|     |    |    |       |      |
|-----|----|----|-------|------|
| -9  | -1 | -7 | 1.14  | 0.38 |
| -9  | 1  | -7 | 1.26  | 0.43 |
| -9  | 1  | -7 | 1.32  | 0.84 |
| -9  | 1  | -7 | 1.91  | 0.45 |
| -9  | 1  | -7 | 0.38  | 0.44 |
| -9  | 1  | -7 | 1.45  | 0.42 |
| -9  | 1  | -7 | 1.89  | 0.45 |
| -10 | -1 | -7 | 0.19  | 0.22 |
| -10 | -1 | -7 | 0.57  | 0.28 |
| -10 | -1 | -7 | -0.15 | 0.24 |
| -10 | 1  | -7 | 0.28  | 0.29 |
| -10 | 1  | -7 | -0.46 | 0.31 |
| -10 | 1  | -7 | 0.47  | 0.26 |
| -10 | 1  | -7 | 0.02  | 0.34 |
| 0   | 2  | -7 | 31.04 | 2.04 |
| 0   | 2  | -7 | 31.61 | 2.13 |
| 0   | 2  | 7  | 33.94 | 2.26 |
| 0   | -2 | 7  | 32.78 | 2.11 |
| 0   | -2 | -7 | 32.67 | 2.23 |
| 0   | 2  | -7 | 30.03 | 1.83 |
| 0   | 2  | -7 | 30.49 | 1.78 |
| 0   | -2 | -7 | 32.40 | 1.91 |
| 0   | -2 | -7 | 34.19 | 2.22 |
| 0   | -2 | -7 | 30.11 | 1.83 |
| 0   | 2  | -7 | 35.21 | 2.10 |
| -1  | 2  | 7  | 42.73 | 2.34 |
| 1   | 2  | -7 | 44.09 | 2.42 |
| 1   | -2 | 7  | 46.28 | 2.68 |
| -1  | -2 | -7 | 38.61 | 2.35 |
| -1  | -2 | -7 | 40.47 | 2.66 |
| -1  | -2 | -7 | 41.87 | 2.28 |
| -1  | -2 | -7 | 42.84 | 2.73 |
| 1   | 2  | -7 | 39.18 | 2.14 |
| 1   | 2  | -7 | 40.68 | 2.19 |
| 1   | 2  | -7 | 39.05 | 2.24 |
| 1   | 2  | -7 | 42.66 | 2.40 |
| -1  | 2  | 7  | 41.85 | 2.48 |
| 1   | 2  | -7 | 42.78 | 2.49 |
| 1   | -2 | -7 | 40.92 | 2.63 |
| 1   | -2 | -7 | 36.59 | 2.54 |
| -1  | 2  | -7 | 42.57 | 2.59 |

## CIF S3

|    |    |    |       |      |
|----|----|----|-------|------|
| 1  | 2  | 7  | 40.34 | 2.69 |
| 1  | -2 | -7 | 40.58 | 2.24 |
| -1 | -2 | 7  | 44.59 | 2.44 |
| 1  | -2 | -7 | 39.27 | 2.30 |
| -1 | 2  | -7 | 40.40 | 2.25 |
| -1 | 2  | -7 | 41.91 | 2.31 |
| -1 | 2  | -7 | 39.42 | 2.25 |
| -1 | 2  | -7 | 40.21 | 2.55 |
| -1 | 2  | -7 | 44.67 | 2.69 |
| -2 | 2  | 7  | 77.88 | 4.12 |
| 2  | -2 | 7  | 77.50 | 4.54 |
| -2 | -2 | -7 | 85.64 | 4.14 |
| 2  | 2  | -7 | 81.10 | 3.98 |
| 2  | 2  | -7 | 73.94 | 4.42 |
| 2  | -2 | 7  | 75.74 | 4.03 |
| -2 | -2 | -7 | 82.64 | 4.60 |
| 2  | 2  | -7 | 78.85 | 4.06 |
| -2 | 2  | 7  | 78.93 | 4.27 |
| 2  | -2 | 7  | 77.50 | 4.58 |
| -2 | -2 | -7 | 70.50 | 4.15 |
| 2  | 2  | -7 | 80.21 | 4.03 |
| -2 | -2 | -7 | 87.31 | 4.58 |
| 2  | -2 | -7 | 80.39 | 4.09 |
| -2 | -2 | 7  | 80.03 | 3.94 |
| -2 | 2  | -7 | 84.93 | 4.54 |
| -2 | 2  | -7 | 77.88 | 4.16 |
| 2  | 2  | 7  | 83.70 | 4.71 |
| -2 | -2 | 7  | 83.35 | 4.18 |
| -2 | -2 | 7  | 76.48 | 3.94 |
| 2  | 2  | 7  | 86.86 | 4.66 |
| -2 | 2  | -7 | 85.07 | 4.61 |
| 2  | -2 | -7 | 85.44 | 4.18 |
| 2  | 2  | 7  | 78.81 | 4.07 |
| -2 | 2  | -7 | 76.72 | 4.15 |
| 2  | -2 | -7 | 87.94 | 4.11 |
| 2  | -2 | -7 | 72.61 | 4.38 |
| 2  | 2  | 7  | 80.80 | 4.10 |
| -3 | 2  | 7  | 13.55 | 1.15 |
| 3  | 2  | -7 | 11.61 | 0.82 |
| 3  | 2  | -7 | 12.62 | 0.72 |
| 3  | -2 | 7  | 10.70 | 1.58 |

## CIF S3

|    |    |    |       |      |
|----|----|----|-------|------|
| -3 | -2 | -7 | 13.19 | 1.09 |
| -3 | 2  | 7  | 12.60 | 1.04 |
| 3  | -2 | 7  | 14.78 | 1.74 |
| -3 | -2 | -7 | 14.25 | 1.50 |
| -3 | 2  | 7  | 12.23 | 0.77 |
| 3  | -2 | 7  | 11.42 | 0.95 |
| -3 | -2 | 7  | 11.84 | 0.69 |
| -3 | 2  | -7 | 14.08 | 0.94 |
| 3  | 2  | 7  | 12.91 | 0.96 |
| 3  | 2  | 7  | 12.17 | 0.85 |
| -3 | -2 | 7  | 13.37 | 0.86 |
| 3  | -2 | -7 | 12.59 | 0.87 |
| -3 | 2  | -7 | 12.56 | 1.02 |
| -3 | 2  | -7 | 15.90 | 1.54 |
| -3 | -2 | 7  | 13.05 | 0.90 |
| 3  | -2 | -7 | 12.37 | 1.00 |
| 3  | 2  | 7  | 11.48 | 1.48 |
| -3 | 2  | -7 | 14.09 | 1.15 |
| 3  | -2 | -7 | 12.64 | 1.10 |
| -3 | 2  | -7 | 13.45 | 1.56 |
| 3  | -2 | -7 | 12.11 | 0.91 |
| 3  | 2  | 7  | 14.50 | 1.72 |
| -3 | -2 | 7  | 12.33 | 0.69 |
| 4  | -2 | 7  | 10.46 | 0.93 |
| -4 | 2  | 7  | 11.81 | 0.87 |
| 4  | -2 | 7  | 9.37  | 1.59 |
| 4  | -2 | 7  | 9.52  | 0.87 |
| -4 | 2  | 7  | 9.96  | 0.73 |
| -4 | -2 | -7 | 9.53  | 0.93 |
| -4 | 2  | 7  | 9.43  | 0.65 |
| -4 | 2  | 7  | 10.71 | 0.67 |
| 4  | -2 | -7 | 12.01 | 0.98 |
| -4 | 2  | -7 | 9.71  | 0.94 |
| 4  | -2 | -7 | 11.61 | 1.06 |
| -4 | -2 | 7  | 10.18 | 0.56 |
| -4 | 2  | -7 | 10.34 | 1.11 |
| 4  | -2 | -7 | 11.24 | 0.79 |
| -4 | 2  | -7 | 10.58 | 0.88 |
| -4 | 2  | -7 | 6.80  | 1.72 |
| 4  | 2  | 7  | 10.25 | 0.94 |
| 4  | -2 | -7 | 10.82 | 0.81 |

## CIF S3

|    |    |    |       |      |
|----|----|----|-------|------|
| -5 | -2 | -7 | 1.77  | 0.72 |
| -5 | -2 | -7 | 0.02  | 0.50 |
| -5 | -2 | -7 | 0.25  | 0.61 |
| -5 | 2  | 7  | 0.73  | 0.38 |
| -5 | -2 | -7 | 0.69  | 0.55 |
| -5 | 2  | 7  | 0.82  | 0.61 |
| -5 | 2  | 7  | 0.65  | 0.31 |
| 5  | -2 | 7  | 0.78  | 0.61 |
| 5  | -2 | -7 | 0.84  | 0.41 |
| -5 | 2  | -7 | 1.22  | 0.54 |
| -5 | 2  | -7 | 0.38  | 0.78 |
| -5 | 2  | -7 | 0.36  | 0.61 |
| 5  | 2  | 7  | 0.64  | 0.60 |
| 5  | -2 | -7 | 0.18  | 0.47 |
| -5 | -2 | 7  | 0.67  | 0.15 |
| 5  | -2 | -7 | 0.93  | 0.74 |
| -5 | -2 | 7  | 0.81  | 0.17 |
| -6 | -2 | -7 | 3.18  | 0.83 |
| -6 | 2  | 7  | 2.74  | 0.49 |
| -6 | 2  | 7  | 3.81  | 0.57 |
| -6 | -2 | -7 | 3.30  | 0.73 |
| 6  | -2 | 7  | 3.60  | 0.79 |
| -6 | -2 | -7 | 3.18  | 0.68 |
| -6 | -2 | -7 | 2.35  | 0.66 |
| -6 | 2  | -7 | 1.77  | 0.93 |
| -6 | 2  | -7 | 3.37  | 0.89 |
| 6  | -2 | -7 | 3.31  | 0.61 |
| -6 | -2 | 7  | 4.21  | 0.90 |
| -6 | 2  | -7 | 3.38  | 0.78 |
| 6  | 2  | 7  | 2.68  | 0.76 |
| 6  | -2 | -7 | 3.90  | 0.85 |
| 6  | -2 | -7 | 3.25  | 0.81 |
| -7 | -2 | -7 | 9.61  | 0.87 |
| -7 | -2 | -7 | 10.07 | 0.91 |
| -7 | 2  | 7  | 7.81  | 0.70 |
| 7  | -2 | 7  | 8.52  | 1.24 |
| -7 | -2 | -7 | 11.44 | 0.90 |
| 7  | 2  | 7  | 9.05  | 1.21 |
| -7 | 2  | -7 | 9.05  | 1.86 |
| -7 | 2  | -7 | 9.44  | 0.89 |
| -8 | -2 | -7 | 5.76  | 1.43 |



## CIF S3

|     |    |    |        |      |
|-----|----|----|--------|------|
| -8  | -2 | -7 | 6.54   | 0.82 |
| -8  | -2 | -7 | 6.63   | 0.82 |
| -8  | -2 | -7 | 6.40   | 0.83 |
| -8  | 2  | 7  | 6.73   | 0.52 |
| -8  | -2 | -7 | 5.85   | 0.77 |
| -8  | 2  | 7  | 6.56   | 0.51 |
| -8  | -2 | -7 | 7.11   | 0.85 |
| -8  | -2 | -7 | 6.66   | 1.22 |
| -8  | -2 | -7 | 6.89   | 0.77 |
| -8  | 2  | -7 | 6.81   | 0.78 |
| -8  | 2  | -7 | 8.17   | 0.90 |
| -8  | 2  | -7 | 8.39   | 0.86 |
| -8  | 2  | -7 | 5.43   | 1.37 |
| -8  | 2  | -7 | 7.46   | 0.95 |
| -8  | 2  | -7 | 8.57   | 0.89 |
| -8  | 2  | -7 | 7.33   | 0.85 |
| -9  | -2 | -7 | 1.27   | 0.34 |
| -9  | -2 | -7 | 1.50   | 0.76 |
| -9  | -2 | -7 | 2.89   | 0.65 |
| -9  | -2 | -7 | 0.97   | 0.39 |
| -9  | -2 | -7 | -0.12  | 1.13 |
| -9  | 2  | -7 | 3.03   | 0.78 |
| -9  | 2  | -7 | 1.25   | 0.43 |
| -9  | 2  | -7 | 1.25   | 0.43 |
| -9  | 2  | -7 | 2.28   | 0.58 |
| -9  | 2  | -7 | 1.33   | 0.76 |
| -9  | 2  | -7 | 1.43   | 0.44 |
| -10 | -2 | -7 | 1.75   | 0.40 |
| -10 | -2 | -7 | 1.88   | 0.47 |
| -10 | 2  | -7 | 1.01   | 0.49 |
| -10 | 2  | -7 | 2.34   | 0.41 |
| -10 | 2  | -7 | 1.39   | 0.34 |
| -10 | 2  | -7 | 1.67   | 0.33 |
| -10 | 2  | -7 | 1.75   | 0.49 |
| 0   | 3  | -7 | 131.84 | 6.63 |
| 0   | 3  | -7 | 131.57 | 6.99 |
| 0   | 3  | 7  | 127.40 | 6.55 |
| 0   | -3 | 7  | 129.80 | 6.87 |
| 0   | -3 | -7 | 121.01 | 6.65 |
| 0   | -3 | -7 | 129.87 | 7.02 |
| 0   | 3  | 7  | 124.26 | 7.09 |

## CIF S3

|    |    |    |        |      |
|----|----|----|--------|------|
| 0  | 3  | -7 | 127.92 | 6.61 |
| 0  | -3 | -7 | 145.28 | 6.79 |
| 0  | 3  | -7 | 145.09 | 6.71 |
| 0  | 3  | -7 | 137.33 | 6.90 |
| 0  | 3  | -7 | 144.01 | 6.94 |
| -1 | -3 | -7 | 31.76  | 2.27 |
| 1  | 3  | -7 | 32.88  | 1.69 |
| 1  | -3 | 7  | 33.70  | 2.19 |
| -1 | 3  | 7  | 27.14  | 1.61 |
| -1 | 3  | 7  | 29.93  | 2.34 |
| 1  | 3  | -7 | 30.82  | 1.70 |
| 1  | 3  | -7 | 32.31  | 1.99 |
| 1  | -3 | 7  | 28.37  | 1.67 |
| 1  | 3  | -7 | 32.05  | 1.78 |
| 1  | 3  | -7 | 32.96  | 1.97 |
| -1 | -3 | -7 | 31.58  | 2.32 |
| -1 | -3 | -7 | 32.82  | 1.89 |
| -1 | 3  | -7 | 32.33  | 1.79 |
| -1 | -3 | 7  | 30.68  | 1.98 |
| -1 | 3  | -7 | 34.12  | 1.79 |
| 1  | -3 | -7 | 31.37  | 2.24 |
| 1  | 3  | 7  | 27.41  | 2.35 |
| -1 | 3  | -7 | 28.83  | 1.84 |
| 1  | -3 | -7 | 27.94  | 1.95 |
| 1  | 3  | 7  | 30.38  | 2.28 |
| -1 | 3  | -7 | 31.29  | 2.24 |
| 1  | 3  | 7  | 29.14  | 1.62 |
| -1 | 3  | -7 | 29.40  | 2.06 |
| -1 | -3 | 7  | 29.63  | 1.62 |
| 1  | -3 | -7 | 31.69  | 1.82 |
| -1 | 3  | -7 | 32.16  | 2.14 |
| 2  | -3 | 7  | 52.31  | 2.73 |
| 2  | -3 | 7  | 57.81  | 3.40 |
| -2 | -3 | -7 | 49.78  | 3.31 |
| 2  | 3  | -7 | 57.20  | 2.73 |
| -2 | -3 | -7 | 52.06  | 2.83 |
| -2 | 3  | 7  | 48.13  | 3.04 |
| 2  | 3  | -7 | 57.45  | 2.98 |
| -2 | 3  | 7  | 53.24  | 2.69 |
| 2  | -3 | 7  | 54.08  | 3.35 |
| 2  | 3  | -7 | 55.91  | 2.80 |

## CIF S3

|    |    |    |       |      |
|----|----|----|-------|------|
| -2 | 3  | 7  | 55.80 | 2.88 |
| 2  | 3  | -7 | 56.72 | 2.69 |
| -2 | -3 | -7 | 49.98 | 3.27 |
| 2  | -3 | -7 | 54.71 | 2.85 |
| -2 | 3  | -7 | 50.25 | 2.76 |
| 2  | -3 | -7 | 51.95 | 2.93 |
| -2 | 3  | -7 | 42.80 | 3.24 |
| -2 | -3 | 7  | 55.42 | 2.65 |
| 2  | 3  | 7  | 51.40 | 2.80 |
| -2 | 3  | -7 | 53.46 | 2.89 |
| 2  | 3  | 7  | 41.17 | 3.21 |
| 2  | -3 | -7 | 55.27 | 2.88 |
| -2 | -3 | 7  | 58.86 | 2.95 |
| -2 | 3  | -7 | 51.81 | 2.87 |
| -2 | -3 | 7  | 54.96 | 2.65 |
| 2  | -3 | -7 | 51.87 | 3.25 |
| -2 | 3  | -7 | 57.61 | 2.84 |
| 2  | 3  | 7  | 48.87 | 2.72 |
| -2 | 3  | -7 | 57.97 | 3.28 |
| -3 | 3  | 7  | 16.62 | 1.20 |
| -3 | 3  | 7  | 17.13 | 0.98 |
| -3 | -3 | -7 | 13.58 | 1.62 |
| -3 | 3  | 7  | 17.04 | 0.96 |
| 3  | 3  | -7 | 16.71 | 1.02 |
| 3  | -3 | 7  | 14.77 | 1.12 |
| -3 | 3  | 7  | 15.78 | 1.37 |
| 3  | -3 | 7  | 17.91 | 2.28 |
| -3 | -3 | -7 | 16.58 | 1.25 |
| 3  | -3 | 7  | 15.98 | 1.86 |
| 3  | 3  | 7  | 14.53 | 1.04 |
| -3 | 3  | -7 | 17.05 | 1.19 |
| 3  | -3 | -7 | 17.44 | 1.13 |
| -3 | -3 | 7  | 16.79 | 0.88 |
| 3  | -3 | -7 | 15.50 | 1.35 |
| -3 | 3  | -7 | 17.29 | 1.10 |
| -3 | 3  | -7 | 17.39 | 1.63 |
| 3  | 3  | 7  | 14.77 | 1.86 |
| -3 | 3  | -7 | 15.41 | 1.28 |
| 3  | -3 | -7 | 16.46 | 1.28 |
| -3 | -3 | 7  | 16.75 | 0.88 |
| -3 | -3 | 7  | 17.02 | 1.08 |

## CIF S3

|    |    |    |       |      |
|----|----|----|-------|------|
| -3 | 3  | -7 | 15.84 | 1.73 |
| 3  | 3  | 7  | 16.05 | 1.14 |
| -4 | 3  | 7  | 11.03 | 0.74 |
| 4  | -3 | 7  | 11.27 | 0.96 |
| -4 | 3  | 7  | 10.68 | 0.83 |
| -4 | -3 | -7 | 11.37 | 1.07 |
| -4 | 3  | 7  | 11.03 | 1.00 |
| -4 | -3 | -7 | 9.11  | 1.03 |
| 4  | -3 | 7  | 10.88 | 1.01 |
| 4  | -3 | 7  | 8.60  | 1.91 |
| -4 | -3 | -7 | 10.22 | 0.86 |
| -4 | 3  | -7 | 12.49 | 1.16 |
| 4  | -3 | -7 | 10.96 | 1.10 |
| -4 | -3 | 7  | 11.56 | 0.61 |
| -4 | 3  | -7 | 11.33 | 1.09 |
| -4 | 3  | -7 | 12.75 | 0.93 |
| 4  | 3  | 7  | 11.10 | 0.95 |
| 4  | -3 | -7 | 11.15 | 1.20 |
| -4 | 3  | -7 | 7.00  | 1.43 |
| 4  | -3 | -7 | 12.20 | 0.91 |
| -5 | 3  | 7  | 2.35  | 0.50 |
| -5 | -3 | -7 | 2.67  | 0.76 |
| -5 | 3  | 7  | 2.80  | 0.75 |
| -5 | -3 | -7 | 2.70  | 0.66 |
| -5 | -3 | -7 | 2.34  | 0.61 |
| -5 | 3  | 7  | 2.45  | 0.62 |
| -5 | -3 | -7 | 3.94  | 0.80 |
| 5  | -3 | 7  | 3.05  | 0.79 |
| 5  | 3  | 7  | 2.84  | 0.82 |
| 5  | -3 | -7 | 3.00  | 0.93 |
| -5 | 3  | -7 | 2.75  | 0.97 |
| 5  | -3 | -7 | 2.22  | 0.64 |
| -5 | 3  | -7 | 3.25  | 0.74 |
| -5 | -3 | 7  | 2.87  | 0.25 |
| -5 | 3  | -7 | 3.38  | 0.86 |
| 5  | -3 | -7 | 3.37  | 0.83 |
| -6 | 3  | 7  | 6.63  | 0.74 |
| -6 | -3 | -7 | 7.42  | 0.88 |
| -6 | -3 | -7 | 6.67  | 0.86 |
| 6  | -3 | 7  | 6.40  | 0.95 |
| -6 | -3 | -7 | 6.69  | 1.21 |

## CIF S3

|    |    |    |       |      |
|----|----|----|-------|------|
| -6 | 3  | 7  | 7.00  | 0.66 |
| -6 | -3 | -7 | 6.59  | 0.82 |
| 6  | -3 | -7 | 5.23  | 0.99 |
| -6 | -3 | 7  | 6.62  | 0.99 |
| -6 | 3  | -7 | 8.06  | 1.34 |
| -6 | 3  | -7 | 7.37  | 0.97 |
| -6 | 3  | -7 | 5.99  | 0.89 |
| 6  | 3  | 7  | 6.95  | 1.01 |
| -6 | 3  | -7 | 7.51  | 1.03 |
| -7 | -3 | -7 | 0.45  | 0.57 |
| -7 | 3  | 7  | 0.19  | 0.38 |
| -7 | -3 | -7 | -0.39 | 0.51 |
| -7 | 3  | 7  | 0.52  | 0.47 |
| -7 | -3 | -7 | 0.44  | 0.58 |
| -7 | -3 | -7 | 0.10  | 0.54 |
| -7 | 3  | -7 | 0.18  | 0.59 |
| -7 | -3 | 7  | 0.95  | 0.76 |
| -8 | 3  | 7  | 10.02 | 0.67 |
| -8 | -3 | -7 | 10.91 | 0.91 |
| -8 | -3 | -7 | 10.21 | 1.35 |
| -8 | -3 | -7 | 9.80  | 1.52 |
| -8 | -3 | -7 | 10.53 | 0.89 |
| -8 | 3  | 7  | 10.24 | 0.72 |
| -8 | -3 | -7 | 11.19 | 0.88 |
| -8 | -3 | -7 | 8.72  | 0.94 |
| -8 | -3 | -7 | 9.00  | 0.89 |
| -8 | 3  | -7 | 9.23  | 1.05 |
| -8 | 3  | -7 | 10.70 | 0.89 |
| -8 | 3  | -7 | 9.44  | 0.98 |
| -8 | 3  | -7 | 9.60  | 0.99 |
| -8 | 3  | -7 | 9.18  | 1.37 |
| -8 | 3  | -7 | 10.12 | 0.96 |
| -9 | 3  | 7  | 0.49  | 0.18 |
| -9 | -3 | -7 | 0.35  | 0.39 |
| -9 | -3 | -7 | -0.13 | 0.80 |
| -9 | 3  | 7  | 0.42  | 0.15 |
| -9 | 3  | 7  | 0.69  | 0.18 |
| -9 | -3 | -7 | 0.45  | 0.36 |
| -9 | 3  | -7 | 0.71  | 0.48 |
| -9 | 3  | -7 | 0.55  | 0.45 |
| -9 | 3  | -7 | 0.38  | 0.41 |

## CIF S3

|     |    |    |       |      |
|-----|----|----|-------|------|
| -9  | 3  | -7 | -0.70 | 0.75 |
| -9  | 3  | -7 | 0.32  | 0.42 |
| -9  | 3  | -7 | 1.15  | 0.43 |
| 10  | -3 | 7  | 5.77  | 0.66 |
| -10 | -3 | -7 | 5.55  | 0.43 |
| -10 | -3 | -7 | 4.73  | 0.48 |
| -10 | 3  | -7 | 5.74  | 0.55 |
| -10 | 3  | -7 | 6.29  | 0.48 |
| -10 | 3  | -7 | 4.02  | 0.59 |
| -10 | 3  | -7 | 5.02  | 0.55 |
| 0   | 4  | 7  | 8.94  | 0.67 |
| 0   | -4 | -7 | 7.96  | 1.33 |
| 0   | 4  | -7 | 7.85  | 1.10 |
| 0   | 4  | -7 | 9.49  | 1.16 |
| 0   | -4 | -7 | 7.38  | 0.97 |
| 0   | -4 | -7 | 10.06 | 1.14 |
| 0   | 4  | -7 | 8.95  | 1.28 |
| 0   | 4  | -7 | 9.39  | 0.83 |
| 0   | 4  | -7 | 8.11  | 0.93 |
| 0   | 4  | 7  | 9.83  | 1.50 |
| 0   | 4  | -7 | 8.12  | 0.83 |
| 0   | -4 | 7  | 7.40  | 0.75 |
| 1   | 4  | -7 | 79.45 | 4.09 |
| 1   | 4  | -7 | 78.66 | 4.33 |
| -1  | -4 | -7 | 81.71 | 4.14 |
| 1   | 4  | -7 | 81.38 | 4.16 |
| -1  | -4 | -7 | 79.17 | 4.62 |
| -1  | 4  | 7  | 77.00 | 4.01 |
| -1  | -4 | -7 | 71.29 | 4.59 |
| 1   | -4 | 7  | 88.25 | 4.63 |
| 1   | -4 | 7  | 82.46 | 4.05 |
| 1   | 4  | -7 | 84.04 | 4.40 |
| -1  | -4 | 7  | 80.37 | 3.99 |
| -1  | 4  | -7 | 82.75 | 4.23 |
| 1   | -4 | -7 | 74.74 | 4.16 |
| -1  | 4  | -7 | 80.87 | 4.18 |
| 1   | 4  | 7  | 69.35 | 4.54 |
| -1  | 4  | -7 | 82.93 | 4.15 |
| -1  | 4  | -7 | 79.36 | 4.48 |
| -1  | 4  | -7 | 78.26 | 4.57 |
| -1  | -4 | 7  | 80.70 | 3.98 |

## CIF S3

|    |    |    |       |      |
|----|----|----|-------|------|
| -1 | 4  | -7 | 95.47 | 4.62 |
| 1  | -4 | -7 | 77.82 | 4.28 |
| 1  | -4 | -7 | 80.50 | 4.61 |
| 1  | 4  | 7  | 75.29 | 4.74 |
| 1  | 4  | 7  | 81.89 | 4.04 |
| 2  | -4 | 7  | 20.68 | 1.33 |
| -2 | -4 | -7 | 20.25 | 1.43 |
| -2 | 4  | 7  | 22.89 | 1.24 |
| 2  | -4 | 7  | 23.55 | 1.99 |
| 2  | 4  | -7 | 24.59 | 1.38 |
| -2 | -4 | -7 | 18.58 | 1.86 |
| -2 | 4  | 7  | 20.38 | 1.73 |
| 2  | 4  | -7 | 23.72 | 1.29 |
| -2 | -4 | 7  | 23.44 | 1.56 |
| -2 | 4  | -7 | 21.04 | 1.39 |
| 2  | -4 | -7 | 21.58 | 1.50 |
| 2  | -4 | -7 | 22.20 | 1.65 |
| -2 | 4  | -7 | 21.70 | 1.33 |
| 2  | 4  | 7  | 20.23 | 1.26 |
| -2 | 4  | -7 | 21.68 | 1.95 |
| 2  | -4 | -7 | 21.78 | 1.90 |
| -2 | 4  | -7 | 20.51 | 1.44 |
| 2  | 4  | 7  | 20.97 | 1.36 |
| 2  | 4  | 7  | 23.92 | 2.03 |
| -2 | 4  | -7 | 19.13 | 1.78 |
| -2 | -4 | 7  | 20.84 | 1.16 |
| -2 | -4 | 7  | 22.01 | 1.14 |
| -2 | 4  | -7 | 20.91 | 1.54 |
| 2  | 4  | 7  | 21.55 | 2.13 |
| 3  | 4  | -7 | 31.86 | 1.73 |
| 3  | -4 | 7  | 28.03 | 1.76 |
| -3 | -4 | -7 | 27.95 | 1.82 |
| 3  | 4  | -7 | 31.55 | 1.68 |
| -3 | 4  | 7  | 33.74 | 1.92 |
| -3 | 4  | 7  | 29.61 | 1.69 |
| -3 | 4  | -7 | 31.32 | 1.77 |
| 3  | 4  | 7  | 37.75 | 2.83 |
| -3 | -4 | 7  | 30.85 | 1.53 |
| 3  | -4 | -7 | 32.15 | 1.96 |
| -3 | 4  | -7 | 31.23 | 1.81 |
| 3  | -4 | -7 | 28.12 | 2.03 |

## CIF S3

|    |    |    |       |      |
|----|----|----|-------|------|
| -3 | -4 | 7  | 31.33 | 1.58 |
| -3 | 4  | -7 | 28.87 | 2.33 |
| 3  | 4  | 7  | 31.64 | 1.82 |
| -3 | -4 | 7  | 31.13 | 1.60 |
| -3 | 4  | -7 | 31.50 | 1.93 |
| 3  | -4 | -7 | 32.95 | 1.83 |
| -3 | -4 | 7  | 30.52 | 1.53 |
| -3 | -4 | 7  | 27.51 | 1.62 |
| -4 | -4 | -7 | 19.16 | 1.41 |
| 4  | -4 | 7  | 20.27 | 1.34 |
| -4 | -4 | -7 | 19.06 | 1.22 |
| -4 | 4  | 7  | 20.17 | 1.21 |
| -4 | 4  | 7  | 20.42 | 1.45 |
| -4 | -4 | -7 | 19.64 | 1.40 |
| 4  | -4 | -7 | 19.40 | 1.35 |
| -4 | -4 | 7  | 19.23 | 1.07 |
| -4 | 4  | -7 | 20.85 | 1.61 |
| -4 | -4 | 7  | 20.89 | 1.04 |
| 4  | -4 | -7 | 19.28 | 1.48 |
| 4  | -4 | -7 | 17.78 | 1.64 |
| -4 | 4  | -7 | 20.20 | 1.40 |
| 4  | 4  | 7  | 19.92 | 1.34 |
| -4 | 4  | -7 | 19.41 | 1.30 |
| -5 | -4 | -7 | 9.15  | 0.86 |
| -5 | -4 | -7 | 9.76  | 1.10 |
| -5 | -4 | -7 | 8.87  | 0.81 |
| -5 | 4  | 7  | 8.52  | 0.84 |
| -5 | 4  | 7  | 10.71 | 0.77 |
| 5  | -4 | 7  | 7.64  | 1.72 |
| -5 | -4 | -7 | 10.34 | 0.84 |
| -5 | 4  | 7  | 8.06  | 1.00 |
| -5 | -4 | -7 | 7.40  | 1.03 |
| 5  | -4 | -7 | 9.05  | 1.11 |
| 5  | 4  | 7  | 9.47  | 1.05 |
| -5 | -4 | 7  | 9.09  | 0.55 |
| 5  | -4 | -7 | 8.85  | 0.91 |
| -5 | 4  | -7 | 8.94  | 0.96 |
| 5  | -4 | -7 | 7.97  | 1.26 |
| -5 | 4  | -7 | 8.39  | 1.00 |
| -5 | 4  | -7 | 9.36  | 1.11 |
| -5 | 4  | -7 | 8.49  | 1.34 |



## CIF S3

|    |    |    |       |      |
|----|----|----|-------|------|
| 6  | -4 | 7  | 18.40 | 1.52 |
| -6 | -4 | -7 | 20.18 | 1.25 |
| -6 | -4 | -7 | 19.03 | 1.53 |
| -6 | -4 | -7 | 16.98 | 1.36 |
| -6 | -4 | -7 | 17.34 | 1.43 |
| -6 | 4  | 7  | 17.97 | 1.19 |
| -6 | 4  | 7  | 15.40 | 1.14 |
| -6 | -4 | -7 | 19.69 | 1.22 |
| -6 | -4 | -7 | 18.84 | 1.21 |
| -6 | 4  | -7 | 16.75 | 1.62 |
| -6 | -4 | 7  | 18.26 | 1.37 |
| -6 | 4  | -7 | 18.84 | 1.29 |
| 6  | -4 | -7 | 14.10 | 1.50 |
| 6  | 4  | 7  | 15.98 | 1.41 |
| -6 | 4  | -7 | 18.08 | 1.45 |
| 6  | -4 | -7 | 19.11 | 1.42 |
| -6 | 4  | -7 | 18.16 | 1.30 |
| -7 | 4  | 7  | 0.82  | 0.54 |
| -7 | -4 | -7 | 0.64  | 0.56 |
| -7 | 4  | 7  | 0.98  | 0.36 |
| -7 | -4 | -7 | 1.89  | 1.08 |
| -7 | 4  | 7  | 1.56  | 0.42 |
| -7 | -4 | -7 | -0.08 | 0.50 |
| -7 | -4 | -7 | -0.09 | 0.94 |
| -7 | -4 | -7 | 0.79  | 0.60 |
| -7 | -4 | -7 | 0.92  | 1.58 |
| -7 | -4 | -7 | 1.20  | 0.56 |
| -7 | 4  | 7  | 0.66  | 0.39 |
| -7 | 4  | 7  | 0.87  | 0.46 |
| -7 | -4 | -7 | 0.31  | 0.47 |
| -7 | -4 | -7 | 1.63  | 0.51 |
| -7 | -4 | -7 | 1.22  | 0.86 |
| -7 | 4  | 7  | 0.89  | 0.49 |
| -7 | 4  | -7 | 2.16  | 0.97 |
| -7 | 4  | -7 | 1.57  | 0.52 |
| -7 | 4  | -7 | 1.38  | 0.67 |
| -7 | 4  | -7 | 0.41  | 1.04 |
| -7 | -4 | 7  | 1.36  | 0.85 |
| -7 | 4  | -7 | 0.89  | 0.61 |
| -7 | 4  | -7 | 0.41  | 0.79 |
| -7 | 4  | -7 | 1.10  | 0.29 |

## CIF S3

|     |    |    |       |      |
|-----|----|----|-------|------|
| -8  | 4  | 7  | 0.92  | 0.59 |
| -8  | -4 | -7 | 2.51  | 0.69 |
| -8  | -4 | -7 | 0.97  | 1.03 |
| -8  | -4 | -7 | 2.44  | 0.69 |
| -8  | 4  | 7  | 1.70  | 0.30 |
| -8  | -4 | -7 | 2.91  | 0.71 |
| -8  | -4 | -7 | 1.19  | 0.53 |
| -8  | 4  | 7  | 2.21  | 0.49 |
| -8  | -4 | -7 | 1.46  | 0.47 |
| -8  | -4 | -7 | 0.73  | 0.83 |
| -8  | 4  | 7  | 1.64  | 0.67 |
| -8  | 4  | -7 | 2.93  | 0.64 |
| -8  | 4  | -7 | 1.85  | 0.48 |
| -8  | 4  | -7 | 2.36  | 0.61 |
| -8  | 4  | -7 | 1.63  | 0.56 |
| -8  | 4  | -7 | 1.70  | 0.58 |
| -9  | -4 | -7 | 3.91  | 0.62 |
| 9   | -4 | 7  | 4.75  | 0.83 |
| -9  | 4  | 7  | 2.81  | 0.37 |
| -9  | -4 | -7 | 2.62  | 0.58 |
| -9  | 4  | 7  | 2.85  | 0.38 |
| -9  | -4 | -7 | 3.53  | 0.57 |
| -9  | -4 | -7 | 1.37  | 0.69 |
| -9  | 4  | 7  | 3.29  | 0.35 |
| -9  | 4  | -7 | 4.43  | 0.63 |
| -9  | 4  | -7 | 3.53  | 0.79 |
| -9  | 4  | -7 | 3.62  | 0.58 |
| -9  | 4  | -7 | 3.61  | 0.68 |
| -9  | 4  | -7 | 3.18  | 0.60 |
| 10  | -4 | 7  | 0.91  | 0.33 |
| -10 | 4  | -7 | 0.51  | 0.22 |
| -10 | 4  | -7 | 0.57  | 0.27 |
| -10 | 4  | -7 | 0.19  | 0.28 |
| 0   | -5 | 7  | 15.64 | 1.78 |
| 0   | 5  | 7  | 16.17 | 0.99 |
| 0   | 5  | -7 | 17.37 | 1.22 |
| 0   | 5  | 7  | 10.39 | 1.70 |
| 0   | -5 | 7  | 15.44 | 0.98 |
| 0   | 5  | -7 | 14.73 | 1.12 |
| 0   | -5 | -7 | 14.33 | 1.32 |
| 0   | 5  | -7 | 17.14 | 1.54 |

## CIF S3

|    |    |    |       |      |
|----|----|----|-------|------|
| 0  | 5  | -7 | 16.07 | 1.13 |
| 0  | -5 | -7 | 13.29 | 1.66 |
| -1 | -5 | -7 | 11.16 | 1.06 |
| -1 | 5  | 7  | 11.80 | 0.81 |
| 1  | 5  | -7 | 11.07 | 1.01 |
| -1 | -5 | -7 | 7.81  | 1.49 |
| 1  | 5  | -7 | 12.32 | 0.95 |
| 1  | -5 | 7  | 10.31 | 0.93 |
| -1 | -5 | -7 | 7.35  | 1.52 |
| -1 | -5 | -7 | 7.38  | 1.43 |
| 1  | -5 | -7 | 8.94  | 1.27 |
| 1  | -5 | -7 | 10.18 | 1.26 |
| -1 | 5  | -7 | 10.83 | 1.07 |
| -1 | -5 | 7  | 11.38 | 0.93 |
| -1 | 5  | -7 | 10.19 | 0.94 |
| -1 | 5  | -7 | 10.34 | 0.99 |
| -1 | 5  | -7 | 11.03 | 1.46 |
| -1 | -5 | 7  | 12.43 | 1.96 |
| -1 | -5 | 7  | 8.95  | 1.30 |
| 1  | -5 | -7 | 8.88  | 1.51 |
| 1  | 5  | 7  | 11.62 | 0.80 |
| 1  | 5  | 7  | 10.78 | 1.47 |
| 1  | 5  | 7  | 10.58 | 1.67 |
| 2  | -5 | 7  | 2.77  | 0.70 |
| -2 | -5 | -7 | 2.91  | 0.94 |
| 2  | 5  | -7 | 3.12  | 0.66 |
| -2 | 5  | 7  | 2.54  | 0.53 |
| -2 | -5 | -7 | 0.61  | 0.98 |
| -2 | -5 | -7 | 3.23  | 1.21 |
| 2  | -5 | 7  | 3.63  | 1.27 |
| 2  | 5  | -7 | 3.14  | 0.71 |
| -2 | 5  | 7  | 3.26  | 0.57 |
| 2  | -5 | -7 | 2.06  | 1.00 |
| -2 | 5  | -7 | 3.18  | 0.76 |
| 2  | 5  | 7  | 1.63  | 1.08 |
| -2 | 5  | -7 | 3.48  | 1.07 |
| 2  | 5  | 7  | 2.85  | 0.56 |
| 2  | -5 | -7 | 3.38  | 0.99 |
| -2 | 5  | -7 | 3.26  | 0.60 |
| -2 | -5 | 7  | 3.10  | 0.48 |
| -2 | -5 | 7  | 4.36  | 0.97 |

## CIF S3

|    |    |    |       |      |
|----|----|----|-------|------|
| 2  | -5 | -7 | 2.86  | 1.23 |
| -2 | 5  | -7 | 2.93  | 0.83 |
| -2 | -5 | 7  | 3.60  | 0.57 |
| -2 | -5 | 7  | 3.01  | 0.43 |
| 3  | 5  | -7 | 6.31  | 0.68 |
| 3  | -5 | 7  | 7.47  | 1.63 |
| -3 | 5  | 7  | 5.88  | 0.71 |
| 3  | 5  | -7 | 6.37  | 0.72 |
| 3  | -5 | 7  | 5.81  | 0.85 |
| -3 | 5  | 7  | 5.39  | 0.71 |
| -3 | -5 | -7 | 7.59  | 1.04 |
| -3 | -5 | -7 | 3.93  | 0.93 |
| -3 | -5 | 7  | 5.77  | 0.42 |
| 3  | -5 | -7 | 6.69  | 1.92 |
| -3 | 5  | -7 | 5.06  | 0.80 |
| -3 | 5  | -7 | 6.07  | 0.97 |
| 3  | -5 | -7 | 5.09  | 1.00 |
| 3  | 5  | 7  | 5.57  | 0.87 |
| -3 | -5 | 7  | 6.24  | 0.44 |
| -3 | -5 | 7  | 5.96  | 0.62 |
| 3  | -5 | -7 | 5.33  | 1.23 |
| -3 | -5 | 7  | 6.05  | 0.52 |
| -3 | 5  | -7 | 6.50  | 1.11 |
| -3 | -5 | 7  | 5.74  | 0.60 |
| -4 | 5  | 7  | 14.63 | 1.38 |
| -4 | -5 | -7 | 14.77 | 1.36 |
| -4 | 5  | 7  | 15.16 | 1.12 |
| -4 | -5 | -7 | 16.82 | 1.13 |
| -4 | -5 | -7 | 15.93 | 1.42 |
| 4  | -5 | 7  | 16.16 | 1.25 |
| -4 | 5  | -7 | 15.49 | 1.26 |
| -4 | 5  | -7 | 17.48 | 1.20 |
| 4  | 5  | 7  | 15.98 | 1.23 |
| -4 | -5 | 7  | 16.48 | 0.91 |
| 4  | -5 | -7 | 15.29 | 1.54 |
| -4 | -5 | 7  | 15.44 | 1.31 |
| -4 | 5  | -7 | 18.78 | 1.45 |
| 4  | -5 | -7 | 14.78 | 1.40 |
| -4 | -5 | 7  | 15.47 | 0.93 |
| -5 | -5 | -7 | 3.94  | 1.12 |
| -5 | -5 | -7 | 6.60  | 0.90 |

## CIF S3

|    |    |    |       |      |
|----|----|----|-------|------|
| -5 | 5  | 7  | 4.04  | 0.77 |
| -5 | 5  | 7  | 4.59  | 1.07 |
| -5 | -5 | -7 | 4.93  | 1.10 |
| -5 | 5  | 7  | 5.06  | 0.80 |
| -5 | -5 | -7 | 5.08  | 0.80 |
| -5 | -5 | -7 | 5.27  | 0.75 |
| -5 | -5 | -7 | 4.53  | 1.18 |
| -5 | -5 | 7  | 4.72  | 0.94 |
| 5  | 5  | 7  | 4.33  | 0.95 |
| 5  | -5 | -7 | 4.61  | 1.04 |
| -5 | 5  | -7 | 4.95  | 1.15 |
| -5 | 5  | -7 | 6.05  | 1.07 |
| 5  | -5 | -7 | 4.56  | 1.16 |
| -5 | 5  | -7 | 4.38  | 0.85 |
| -5 | 5  | -7 | 3.72  | 0.80 |
| -6 | -5 | -7 | 11.29 | 1.31 |
| -6 | -5 | -7 | 8.33  | 1.06 |
| -6 | 5  | 7  | 9.56  | 0.96 |
| -6 | -5 | -7 | 10.95 | 0.95 |
| -6 | -5 | -7 | 9.37  | 1.31 |
| -6 | -5 | -7 | 9.92  | 0.99 |
| -6 | 5  | 7  | 8.44  | 1.04 |
| -6 | -5 | -7 | 8.13  | 1.02 |
| -6 | 5  | -7 | 10.58 | 0.95 |
| -6 | 5  | -7 | 9.22  | 1.20 |
| -6 | 5  | -7 | 10.54 | 1.11 |
| 6  | 5  | 7  | 9.61  | 1.14 |
| -6 | -5 | 7  | 10.68 | 1.13 |
| 6  | -5 | -7 | 7.65  | 1.17 |
| -6 | 5  | -7 | 13.40 | 1.58 |
| 7  | -5 | 7  | 7.20  | 1.57 |
| -7 | -5 | -7 | 5.60  | 0.83 |
| -7 | -5 | -7 | 6.50  | 1.30 |
| -7 | -5 | -7 | 7.45  | 0.88 |
| -7 | 5  | 7  | 6.65  | 0.78 |
| -7 | -5 | -7 | 6.06  | 1.12 |
| -7 | 5  | 7  | 6.84  | 0.87 |
| -7 | 5  | 7  | 6.97  | 0.73 |
| -7 | 5  | 7  | 6.95  | 0.72 |
| -7 | -5 | -7 | 5.43  | 1.63 |
| -7 | -5 | -7 | 6.09  | 0.92 |

## CIF S3

|    |    |    |      |      |
|----|----|----|------|------|
| -7 | -5 | -7 | 6.60 | 1.39 |
| -7 | 5  | 7  | 6.62 | 0.90 |
| -7 | -5 | -7 | 6.81 | 0.62 |
| -7 | 5  | 7  | 7.06 | 0.85 |
| -7 | -5 | -7 | 6.64 | 0.87 |
| -7 | -5 | -7 | 6.42 | 0.83 |
| -7 | 5  | -7 | 6.68 | 1.61 |
| -7 | 5  | -7 | 7.06 | 0.85 |
| -7 | 5  | -7 | 6.41 | 0.95 |
| -7 | 5  | -7 | 6.94 | 0.90 |
| -7 | -5 | 7  | 5.75 | 1.04 |
| -7 | 5  | -7 | 6.95 | 0.64 |
| -8 | 5  | 7  | 3.74 | 0.58 |
| -8 | 5  | 7  | 3.43 | 0.45 |
| -8 | -5 | -7 | 3.79 | 0.79 |
| -8 | -5 | -7 | 2.59 | 0.95 |
| -8 | 5  | 7  | 4.42 | 0.74 |
| 8  | -5 | 7  | 3.69 | 1.01 |
| -8 | 5  | 7  | 4.23 | 0.57 |
| -8 | -5 | -7 | 4.20 | 0.74 |
| -8 | -5 | -7 | 4.05 | 0.73 |
| -8 | -5 | -7 | 2.84 | 0.64 |
| -8 | 5  | -7 | 4.27 | 0.83 |
| -8 | 5  | -7 | 3.12 | 0.59 |
| -8 | 5  | -7 | 3.62 | 0.70 |
| -8 | 5  | -7 | 3.89 | 0.83 |
| -9 | -5 | -7 | 4.34 | 0.55 |
| -9 | 5  | 7  | 4.91 | 0.41 |
| -9 | 5  | 7  | 4.43 | 0.65 |
| -9 | 5  | 7  | 3.69 | 0.43 |
| -9 | -5 | -7 | 4.09 | 0.60 |
| 9  | -5 | 7  | 4.45 | 0.73 |
| -9 | -5 | -7 | 3.84 | 0.61 |
| -9 | 5  | -7 | 4.69 | 0.64 |
| -9 | 5  | -7 | 4.88 | 0.67 |
| -9 | 5  | -7 | 3.96 | 0.72 |
| -9 | 5  | -7 | 4.72 | 0.59 |
| 0  | 6  | -7 | 3.49 | 1.26 |
| 0  | 6  | -7 | 4.96 | 0.86 |
| 0  | -6 | -7 | 5.25 | 1.31 |
| 0  | 6  | 7  | 4.49 | 0.61 |

## CIF S3

|    |    |    |       |      |
|----|----|----|-------|------|
| 0  | 6  | -7 | 4.67  | 0.76 |
| 0  | -6 | 7  | 4.09  | 0.72 |
| 0  | -6 | 7  | 5.07  | 0.72 |
| 0  | -6 | 7  | 1.08  | 1.07 |
| 0  | -6 | -7 | 4.96  | 1.02 |
| 0  | 6  | -7 | 3.53  | 0.87 |
| 0  | 6  | 7  | 4.78  | 1.40 |
| -1 | -6 | -7 | -1.55 | 1.11 |
| 1  | -6 | 7  | -0.02 | 1.17 |
| 1  | 6  | -7 | 0.65  | 0.61 |
| 1  | -6 | 7  | 0.87  | 0.54 |
| -1 | -6 | -7 | -0.92 | 0.91 |
| -1 | 6  | 7  | 0.92  | 0.46 |
| 1  | 6  | -7 | 1.15  | 0.71 |
| 1  | -6 | 7  | 1.44  | 0.88 |
| -1 | -6 | -7 | 0.46  | 0.80 |
| 1  | -6 | -7 | 0.04  | 1.42 |
| -1 | 6  | -7 | 1.10  | 0.61 |
| 1  | 6  | 7  | 0.67  | 0.43 |
| -1 | 6  | -7 | 1.02  | 0.70 |
| 1  | 6  | 7  | 0.75  | 1.01 |
| -1 | 6  | -7 | 0.47  | 0.63 |
| -1 | -6 | 7  | -0.06 | 0.50 |
| 1  | -6 | -7 | 1.98  | 1.04 |
| -1 | -6 | 7  | 0.16  | 1.02 |
| -1 | 6  | -7 | 0.44  | 0.84 |
| 1  | -6 | -7 | 0.48  | 0.94 |
| 2  | -6 | 7  | 22.94 | 1.36 |
| -2 | -6 | -7 | 18.35 | 1.89 |
| 2  | -6 | 7  | 20.05 | 2.41 |
| -2 | 6  | 7  | 20.88 | 1.26 |
| 2  | 6  | -7 | 22.38 | 1.45 |
| -2 | -6 | -7 | 17.61 | 2.40 |
| -2 | -6 | -7 | 21.55 | 1.53 |
| 2  | 6  | -7 | 23.12 | 1.41 |
| -2 | 6  | 7  | 21.36 | 1.51 |
| -2 | -6 | 7  | 22.50 | 1.16 |
| -2 | -6 | 7  | 20.63 | 1.19 |
| -2 | -6 | 7  | 19.74 | 1.33 |
| -2 | 6  | -7 | 19.74 | 1.35 |
| -2 | -6 | 7  | 22.58 | 1.25 |

## CIF S3

|    |    |    |       |      |
|----|----|----|-------|------|
| 2  | -6 | -7 | 18.93 | 2.54 |
| 2  | -6 | -7 | 21.52 | 1.86 |
| -2 | 6  | -7 | 21.84 | 1.63 |
| 2  | 6  | 7  | 19.57 | 1.28 |
| 2  | -6 | -7 | 16.10 | 1.58 |
| -2 | -6 | 7  | 20.68 | 1.40 |
| 3  | 6  | -7 | 1.47  | 0.58 |
| -3 | -6 | -7 | -0.10 | 0.68 |
| 3  | -6 | 7  | 0.75  | 0.66 |
| -3 | 6  | 7  | 0.71  | 0.60 |
| -3 | 6  | 7  | 0.76  | 0.49 |
| 3  | 6  | -7 | 0.22  | 0.56 |
| -3 | -6 | -7 | 0.11  | 0.77 |
| -3 | -6 | 7  | 0.61  | 0.37 |
| -3 | -6 | 7  | 1.11  | 0.28 |
| -3 | -6 | 7  | 0.64  | 0.45 |
| -3 | 6  | -7 | 1.67  | 0.75 |
| -3 | -6 | 7  | 0.65  | 0.46 |
| -3 | 6  | -7 | -0.06 | 0.66 |
| -3 | -6 | 7  | 0.77  | 0.67 |
| -3 | 6  | -7 | 1.25  | 0.62 |
| 3  | -6 | -7 | 0.46  | 1.05 |
| 3  | -6 | -7 | 0.96  | 1.11 |
| 3  | 6  | 7  | 0.13  | 0.72 |
| -4 | -6 | -7 | 36.59 | 1.93 |
| -4 | -6 | -7 | 30.63 | 2.09 |
| 4  | -6 | 7  | 34.54 | 2.03 |
| -4 | 6  | 7  | 32.56 | 1.88 |
| -4 | 6  | 7  | 32.77 | 1.93 |
| 4  | 6  | -7 | 35.21 | 1.99 |
| -4 | -6 | -7 | 31.46 | 2.12 |
| -4 | -6 | -7 | 33.80 | 2.08 |
| -4 | -6 | -7 | 32.80 | 1.89 |
| -4 | -6 | 7  | 33.29 | 2.05 |
| 4  | -6 | -7 | 24.85 | 2.33 |
| -4 | -6 | 7  | 37.57 | 1.78 |
| -4 | 6  | -7 | 35.68 | 2.02 |
| 4  | 6  | 7  | 33.98 | 2.07 |
| -4 | 6  | -7 | 37.04 | 2.32 |
| -4 | 6  | -7 | 34.18 | 2.12 |
| 4  | -6 | -7 | 31.88 | 2.24 |



## CIF S3

|    |    |    |       |      |
|----|----|----|-------|------|
| -4 | -6 | 7  | 34.76 | 1.80 |
| -5 | -6 | -7 | 52.34 | 2.81 |
| -5 | -6 | -7 | 52.54 | 2.68 |
| -5 | 6  | 7  | 53.05 | 2.93 |
| -5 | -6 | -7 | 46.67 | 2.64 |
| -5 | 6  | 7  | 51.82 | 2.69 |
| -5 | -6 | -7 | 54.47 | 2.89 |
| -5 | 6  | 7  | 50.36 | 2.64 |
| -5 | -6 | -7 | 51.07 | 2.92 |
| 5  | -6 | -7 | 45.22 | 2.94 |
| -5 | 6  | -7 | 52.51 | 2.83 |
| -5 | -6 | 7  | 50.48 | 2.71 |
| -5 | 6  | -7 | 51.00 | 2.73 |
| -5 | -6 | 7  | 48.94 | 2.75 |
| -5 | 6  | -7 | 45.17 | 2.99 |
| -5 | 6  | -7 | 47.59 | 2.87 |
| 5  | 6  | 7  | 50.35 | 2.90 |
| -6 | 6  | 7  | 4.53  | 1.06 |
| -6 | 6  | 7  | 1.87  | 0.71 |
| -6 | -6 | -7 | 3.15  | 1.14 |
| -6 | -6 | -7 | 4.47  | 0.84 |
| -6 | 6  | 7  | 3.23  | 0.73 |
| -6 | -6 | -7 | 3.22  | 0.68 |
| -6 | -6 | -7 | 1.55  | 0.68 |
| -6 | -6 | -7 | 2.71  | 0.95 |
| -6 | 6  | 7  | 2.14  | 0.85 |
| 6  | -6 | 7  | 2.95  | 0.87 |
| -6 | 6  | 7  | 1.58  | 0.72 |
| -6 | -6 | -7 | 3.39  | 0.78 |
| -6 | -6 | -7 | 4.97  | 0.81 |
| -6 | 6  | -7 | 3.24  | 0.81 |
| -6 | -6 | 7  | 3.49  | 0.50 |
| -6 | 6  | -7 | 7.90  | 2.03 |
| -6 | -6 | 7  | 5.39  | 1.04 |
| -6 | 6  | -7 | 3.60  | 0.93 |
| -6 | -6 | 7  | 3.50  | 0.46 |
| -6 | 6  | -7 | 3.41  | 1.01 |
| -7 | -6 | -7 | 3.54  | 0.85 |
| -7 | -6 | -7 | 5.79  | 0.76 |
| -7 | -6 | -7 | 4.15  | 0.85 |
| -7 | -6 | -7 | 5.07  | 1.50 |

## CIF S3

|    |    |    |       |      |
|----|----|----|-------|------|
| -7 | -6 | -7 | 5.01  | 0.90 |
| -7 | 6  | 7  | 5.17  | 0.75 |
| -7 | 6  | 7  | 4.49  | 0.84 |
| -7 | 6  | 7  | 6.49  | 0.85 |
| -7 | 6  | 7  | 5.10  | 0.84 |
| 7  | -6 | 7  | 4.77  | 1.08 |
| -7 | -6 | -7 | 3.41  | 0.91 |
| -7 | 6  | 7  | 4.58  | 0.85 |
| -7 | -6 | -7 | 4.34  | 0.83 |
| -7 | -6 | -7 | 6.21  | 1.43 |
| -7 | 6  | -7 | 5.48  | 0.64 |
| -7 | 6  | -7 | 5.44  | 0.91 |
| -7 | -6 | 7  | 4.15  | 1.14 |
| -7 | 6  | -7 | 5.77  | 1.51 |
| -7 | 6  | -7 | 4.23  | 0.95 |
| -7 | 6  | -7 | 4.81  | 0.81 |
| -8 | 6  | 7  | 15.30 | 0.94 |
| 8  | -6 | 7  | 14.03 | 1.21 |
| -8 | -6 | -7 | 15.26 | 1.03 |
| -8 | 6  | 7  | 14.73 | 0.89 |
| -8 | -6 | -7 | 14.38 | 0.99 |
| -8 | 6  | 7  | 13.78 | 0.95 |
| -8 | -6 | -7 | 14.60 | 1.04 |
| -8 | 6  | 7  | 14.72 | 1.09 |
| -8 | -6 | -7 | 14.61 | 1.43 |
| -8 | 6  | -7 | 14.53 | 1.11 |
| -8 | 6  | -7 | 14.59 | 1.50 |
| -8 | 6  | -7 | 14.58 | 0.98 |
| -8 | 6  | -7 | 17.62 | 1.41 |
| -8 | 6  | -7 | 14.91 | 1.12 |
| -9 | -6 | -7 | 1.02  | 0.38 |
| 9  | -6 | 7  | 0.86  | 0.38 |
| -9 | 6  | 7  | 0.56  | 0.23 |
| -9 | 6  | 7  | 0.11  | 0.25 |
| -9 | 6  | 7  | 0.54  | 0.34 |
| -9 | -6 | -7 | 0.77  | 0.26 |
| -9 | 6  | -7 | 0.53  | 0.34 |
| -9 | 6  | -7 | 0.60  | 0.38 |
| -9 | 6  | -7 | 0.28  | 0.38 |
| -9 | 6  | -7 | 0.77  | 0.32 |
| 0  | 7  | -7 | 61.50 | 3.52 |

## CIF S3

|    |    |    |       |      |
|----|----|----|-------|------|
| 0  | -7 | 7  | 63.75 | 3.21 |
| 0  | -7 | 7  | 61.12 | 3.21 |
| 0  | -7 | -7 | 61.90 | 3.41 |
| 0  | -7 | 7  | 58.86 | 3.25 |
| 0  | 7  | -7 | 61.36 | 3.39 |
| 0  | 7  | 7  | 62.87 | 3.22 |
| 0  | 7  | -7 | 65.79 | 3.40 |
| 0  | -7 | 7  | 60.20 | 3.25 |
| -1 | -7 | -7 | 5.97  | 1.12 |
| 1  | -7 | 7  | 6.49  | 1.05 |
| -1 | 7  | 7  | 5.10  | 0.76 |
| 1  | 7  | -7 | 7.19  | 0.98 |
| 1  | 7  | -7 | 6.54  | 1.06 |
| 1  | -7 | 7  | 8.13  | 0.84 |
| -1 | -7 | 7  | 7.31  | 1.03 |
| -1 | 7  | -7 | 5.84  | 1.08 |
| -1 | -7 | 7  | 5.77  | 0.88 |
| -1 | 7  | -7 | 6.08  | 1.02 |
| 1  | -7 | -7 | 6.58  | 1.33 |
| -1 | 7  | -7 | 8.04  | 1.02 |
| -1 | -7 | 7  | 6.12  | 0.89 |
| 1  | 7  | 7  | 7.33  | 0.75 |
| -1 | -7 | 7  | 6.82  | 0.91 |
| 2  | 7  | -7 | 10.89 | 1.14 |
| -2 | -7 | -7 | 8.74  | 1.18 |
| -2 | 7  | 7  | 9.72  | 0.87 |
| 2  | 7  | -7 | 9.78  | 1.06 |
| 2  | -7 | 7  | 10.37 | 1.01 |
| 2  | -7 | 7  | 9.73  | 1.34 |
| -2 | -7 | -7 | 7.65  | 1.69 |
| -2 | -7 | 7  | 10.19 | 0.72 |
| -2 | -7 | 7  | 9.79  | 1.01 |
| 2  | -7 | -7 | 7.01  | 2.22 |
| -2 | -7 | 7  | 9.12  | 1.16 |
| -2 | -7 | 7  | 9.70  | 0.84 |
| -2 | -7 | 7  | 7.98  | 0.88 |
| -2 | -7 | 7  | 9.26  | 0.98 |
| -2 | 7  | -7 | 11.62 | 1.15 |
| 2  | 7  | 7  | 10.85 | 0.87 |
| 2  | -7 | -7 | 9.89  | 1.42 |
| -2 | 7  | -7 | 10.51 | 1.18 |

## CIF S3

|    |    |    |       |      |
|----|----|----|-------|------|
| -3 | 7  | 7  | 10.97 | 0.98 |
| -3 | -7 | -7 | 10.04 | 1.12 |
| -3 | -7 | -7 | 9.71  | 1.30 |
| -3 | 7  | 7  | 11.98 | 1.05 |
| -3 | -7 | -7 | 10.07 | 1.12 |
| 3  | -7 | 7  | 11.64 | 1.31 |
| 3  | -7 | 7  | 9.72  | 1.10 |
| 3  | 7  | -7 | 11.98 | 1.10 |
| 3  | 7  | -7 | 11.32 | 1.06 |
| -3 | 7  | 7  | 10.21 | 0.94 |
| -3 | -7 | -7 | 11.50 | 1.32 |
| 3  | 7  | 7  | 9.74  | 1.07 |
| -3 | -7 | 7  | 13.83 | 1.13 |
| -3 | 7  | -7 | 11.07 | 1.17 |
| -3 | -7 | 7  | 11.32 | 0.90 |
| -3 | 7  | -7 | 12.11 | 1.10 |
| -3 | -7 | 7  | 11.62 | 0.84 |
| 3  | -7 | -7 | 10.88 | 1.45 |
| 3  | -7 | -7 | 9.91  | 1.58 |
| -3 | -7 | 7  | 11.52 | 0.95 |
| -3 | -7 | 7  | 10.86 | 1.14 |
| -3 | 7  | -7 | 10.68 | 1.39 |
| -3 | -7 | 7  | 12.12 | 0.72 |
| -4 | -7 | -7 | 6.24  | 0.93 |
| -4 | -7 | -7 | 5.35  | 0.88 |
| -4 | 7  | 7  | 6.66  | 0.98 |
| -4 | -7 | -7 | 6.57  | 1.20 |
| -4 | -7 | -7 | 4.68  | 1.12 |
| 4  | 7  | -7 | 6.31  | 0.89 |
| 4  | -7 | 7  | 5.81  | 1.17 |
| -4 | 7  | 7  | 6.21  | 0.88 |
| -4 | -7 | 7  | 6.26  | 0.97 |
| -4 | -7 | 7  | 5.49  | 0.70 |
| 4  | 7  | 7  | 5.45  | 1.01 |
| -4 | 7  | -7 | 5.36  | 0.99 |
| 4  | -7 | -7 | 4.20  | 1.25 |
| -4 | -7 | 7  | 7.03  | 1.09 |
| -4 | 7  | -7 | 5.30  | 1.17 |
| -4 | 7  | -7 | 5.34  | 1.13 |
| 4  | -7 | -7 | 4.36  | 1.32 |
| -5 | -7 | -7 | 15.50 | 1.28 |

## CIF S3

|    |    |    |       |      |
|----|----|----|-------|------|
| -5 | -7 | -7 | 18.39 | 1.57 |
| -5 | -7 | -7 | 15.80 | 1.37 |
| -5 | 7  | 7  | 17.69 | 1.22 |
| 5  | -7 | 7  | 15.92 | 1.38 |
| -5 | 7  | 7  | 19.41 | 1.31 |
| -5 | -7 | -7 | 16.68 | 1.62 |
| -5 | -7 | -7 | 18.58 | 1.23 |
| -5 | 7  | -7 | 17.19 | 1.49 |
| -5 | -7 | 7  | 18.04 | 1.52 |
| 5  | -7 | -7 | 11.84 | 1.53 |
| -5 | -7 | 7  | 16.00 | 1.03 |
| -5 | 7  | -7 | 16.78 | 1.41 |
| 5  | 7  | 7  | 15.03 | 1.41 |
| -5 | -7 | 7  | 18.51 | 1.40 |
| -5 | 7  | -7 | 12.89 | 1.55 |
| -6 | -7 | -7 | 14.68 | 1.22 |
| -6 | 7  | 7  | 15.97 | 1.24 |
| -6 | -7 | -7 | 17.57 | 1.21 |
| -6 | 7  | 7  | 13.59 | 1.05 |
| -6 | 7  | 7  | 12.74 | 1.24 |
| -6 | -7 | -7 | 14.93 | 1.13 |
| -6 | 7  | 7  | 15.34 | 1.19 |
| -6 | -7 | -7 | 14.50 | 1.44 |
| -6 | -7 | -7 | 14.54 | 1.10 |
| -6 | 7  | 7  | 15.20 | 1.26 |
| -6 | 7  | 7  | 13.94 | 1.14 |
| -6 | -7 | -7 | 15.34 | 1.69 |
| -6 | -7 | -7 | 16.74 | 1.16 |
| -6 | 7  | 7  | 14.11 | 1.20 |
| -6 | -7 | -7 | 14.11 | 1.64 |
| 6  | -7 | 7  | 15.28 | 1.29 |
| -6 | -7 | -7 | 15.71 | 1.32 |
| -6 | -7 | 7  | 14.79 | 0.86 |
| -6 | 7  | -7 | 14.37 | 1.23 |
| 6  | 7  | 7  | 13.56 | 1.09 |
| -6 | 7  | -7 | 15.13 | 1.76 |
| -6 | -7 | 7  | 15.74 | 1.43 |
| -6 | -7 | 7  | 15.86 | 0.84 |
| -6 | 7  | -7 | 14.31 | 1.34 |
| -6 | -7 | 7  | 14.10 | 0.82 |
| -6 | 7  | -7 | 10.66 | 1.23 |

## CIF S3

|    |    |    |       |      |
|----|----|----|-------|------|
| -6 | -7 | 7  | 14.91 | 1.39 |
| -7 | 7  | 7  | 11.58 | 1.14 |
| -7 | -7 | -7 | 9.64  | 1.07 |
| -7 | -7 | -7 | 11.24 | 0.97 |
| -7 | 7  | 7  | 11.99 | 1.00 |
| -7 | -7 | -7 | 10.75 | 0.98 |
| -7 | -7 | -7 | 9.83  | 0.91 |
| -7 | 7  | 7  | 8.67  | 1.37 |
| -7 | 7  | 7  | 12.71 | 0.92 |
| -7 | -7 | -7 | 11.38 | 1.31 |
| -7 | -7 | -7 | 10.38 | 1.31 |
| -7 | -7 | -7 | 11.62 | 1.32 |
| 7  | -7 | 7  | 11.22 | 1.19 |
| -7 | 7  | 7  | 10.33 | 0.96 |
| -7 | 7  | -7 | 11.49 | 0.77 |
| -7 | 7  | -7 | 10.91 | 0.92 |
| -7 | 7  | -7 | 11.46 | 1.10 |
| -7 | -7 | 7  | 9.16  | 1.22 |
| -7 | 7  | -7 | 7.19  | 1.60 |
| 7  | 7  | 7  | 10.12 | 0.91 |
| -7 | 7  | -7 | 11.19 | 1.01 |
| -8 | 7  | 7  | 4.13  | 0.60 |
| -8 | -7 | -7 | 4.71  | 0.66 |
| -8 | 7  | 7  | 4.66  | 0.69 |
| -8 | -7 | -7 | 4.13  | 0.94 |
| -8 | 7  | 7  | 4.66  | 0.84 |
| 8  | -7 | 7  | 3.84  | 0.75 |
| -8 | 7  | 7  | 3.61  | 0.54 |
| -8 | 7  | -7 | 1.55  | 0.78 |
| -8 | 7  | -7 | 5.05  | 0.63 |
| -8 | 7  | -7 | 3.52  | 0.84 |
| -8 | 7  | -7 | 4.81  | 0.74 |
| -8 | -7 | 7  | 5.00  | 0.90 |
| 9  | -7 | 7  | 0.70  | 0.30 |
| -9 | 7  | 7  | 1.04  | 0.31 |
| -9 | -7 | -7 | 0.81  | 0.32 |
| -9 | 7  | 7  | 0.48  | 0.20 |
| -9 | -7 | -7 | 0.86  | 0.26 |
| -9 | 7  | 7  | 0.56  | 0.34 |
| -9 | 7  | -7 | 1.03  | 0.32 |
| -9 | 7  | -7 | 0.57  | 0.32 |

## CIF S3

|    |    |    |       |      |
|----|----|----|-------|------|
| -9 | 7  | -7 | 1.11  | 0.34 |
| -9 | 7  | -7 | 0.95  | 0.28 |
| 0  | 8  | -7 | 10.08 | 1.17 |
| 0  | -8 | 7  | 9.95  | 0.97 |
| 0  | -8 | 7  | 8.82  | 1.04 |
| 0  | -8 | 7  | 8.03  | 1.01 |
| 0  | 8  | -7 | 9.57  | 1.19 |
| 0  | -8 | 7  | 10.17 | 1.12 |
| 0  | 8  | -7 | 9.97  | 1.22 |
| 0  | -8 | 7  | 9.55  | 0.97 |
| 0  | 8  | 7  | 9.65  | 0.95 |
| 0  | -8 | 7  | 8.62  | 1.38 |
| 1  | 8  | -7 | 22.64 | 1.78 |
| 1  | 8  | -7 | 22.36 | 1.65 |
| 1  | -8 | 7  | 24.06 | 1.60 |
| 1  | -8 | 7  | 26.08 | 1.59 |
| 1  | 8  | -7 | 25.92 | 1.73 |
| -1 | 8  | 7  | 25.54 | 1.56 |
| 1  | -8 | 7  | 22.46 | 1.56 |
| -1 | -8 | 7  | 20.66 | 1.52 |
| -1 | -8 | 7  | 23.25 | 1.54 |
| 1  | 8  | 7  | 23.48 | 1.50 |
| -1 | 8  | -7 | 25.37 | 1.76 |
| -1 | -8 | 7  | 22.82 | 1.45 |
| -1 | -8 | 7  | 22.61 | 1.54 |
| -1 | 8  | -7 | 26.02 | 1.82 |
| -1 | -8 | 7  | 23.48 | 1.46 |
| 2  | -8 | 7  | 9.37  | 1.05 |
| 2  | 8  | -7 | 9.91  | 1.11 |
| -2 | 8  | 7  | 9.44  | 0.92 |
| 2  | -8 | 7  | 10.11 | 1.22 |
| -2 | 8  | 7  | 8.60  | 0.96 |
| 2  | 8  | -7 | 8.44  | 1.23 |
| 2  | -8 | 7  | 8.21  | 0.99 |
| -2 | -8 | -7 | 9.03  | 1.25 |
| -2 | -8 | -7 | 11.23 | 1.49 |
| 2  | -8 | -7 | 7.15  | 1.28 |
| 2  | 8  | 7  | 8.74  | 0.89 |
| -2 | -8 | 7  | 8.80  | 1.06 |
| -2 | -8 | 7  | 8.70  | 1.12 |
| -2 | -8 | 7  | 8.69  | 0.92 |

## CIF S3

|    |    |    |       |      |
|----|----|----|-------|------|
| -2 | -8 | 7  | 8.51  | 0.89 |
| -2 | -8 | 7  | 10.05 | 1.05 |
| -2 | 8  | -7 | 10.43 | 1.23 |
| -3 | -8 | -7 | 8.25  | 0.99 |
| -3 | -8 | -7 | 8.38  | 1.20 |
| 3  | -8 | 7  | 6.89  | 1.09 |
| -3 | 8  | 7  | 9.73  | 0.98 |
| 3  | 8  | -7 | 9.68  | 1.08 |
| 3  | -8 | 7  | 7.06  | 1.38 |
| -3 | -8 | -7 | 8.56  | 1.10 |
| -3 | -8 | -7 | 10.62 | 1.18 |
| 3  | 8  | -7 | 7.97  | 1.15 |
| -3 | 8  | 7  | 10.02 | 0.97 |
| -3 | 8  | -7 | 9.20  | 1.43 |
| -3 | 8  | -7 | 7.67  | 1.25 |
| -3 | -8 | 7  | 9.29  | 0.97 |
| -3 | -8 | 7  | 10.02 | 1.06 |
| -3 | -8 | 7  | 9.84  | 1.04 |
| -3 | 8  | -7 | 9.79  | 1.06 |
| -3 | -8 | 7  | 8.72  | 0.69 |
| 3  | -8 | -7 | 10.64 | 1.49 |
| -3 | -8 | 7  | 9.13  | 1.15 |
| -3 | -8 | 7  | 9.20  | 0.96 |
| -4 | 8  | 7  | 17.17 | 1.30 |
| -4 | -8 | -7 | 15.16 | 1.43 |
| 4  | -8 | 7  | 18.93 | 1.53 |
| -4 | -8 | -7 | 15.99 | 1.21 |
| -4 | 8  | 7  | 15.22 | 1.27 |
| -4 | -8 | -7 | 16.64 | 1.24 |
| -4 | -8 | -7 | 19.05 | 1.53 |
| -4 | -8 | 7  | 17.22 | 1.40 |
| -4 | 8  | -7 | 17.37 | 1.48 |
| -4 | -8 | 7  | 19.08 | 1.15 |
| -4 | 8  | -7 | 18.87 | 1.56 |
| -4 | 8  | -7 | 18.60 | 1.73 |
| 4  | 8  | 7  | 16.42 | 1.48 |
| -4 | -8 | 7  | 19.22 | 1.56 |
| 4  | -8 | -7 | 10.30 | 1.67 |
| -5 | 8  | 7  | 3.41  | 0.93 |
| -5 | -8 | -7 | 3.12  | 1.07 |
| -5 | 8  | 7  | 2.19  | 0.69 |



## CIF S3

|    |    |    |      |      |
|----|----|----|------|------|
| -5 | 8  | 7  | 2.01 | 0.69 |
| -5 | -8 | -7 | 1.74 | 1.02 |
| -5 | 8  | 7  | 2.81 | 0.72 |
| -5 | -8 | -7 | 2.42 | 0.73 |
| -5 | -8 | -7 | 2.76 | 0.72 |
| -5 | -8 | -7 | 1.96 | 1.04 |
| -5 | 8  | 7  | 3.35 | 0.91 |
| -5 | -8 | -7 | 1.52 | 0.69 |
| 5  | -8 | 7  | 1.90 | 0.61 |
| 5  | -8 | 7  | 3.07 | 0.94 |
| -5 | 8  | 7  | 2.00 | 0.70 |
| -5 | 8  | 7  | 1.35 | 0.75 |
| -5 | -8 | 7  | 2.51 | 0.59 |
| -5 | -8 | 7  | 1.70 | 0.84 |
| -5 | -8 | 7  | 2.23 | 0.75 |
| -5 | -8 | 7  | 2.72 | 0.43 |
| -5 | -8 | 7  | 2.90 | 0.54 |
| -5 | 8  | -7 | 1.76 | 0.80 |
| -5 | 8  | -7 | 1.06 | 0.84 |
| 5  | 8  | 7  | 2.74 | 0.63 |
| -6 | 8  | 7  | 1.66 | 0.63 |
| -6 | -8 | -7 | 2.21 | 0.66 |
| -6 | -8 | -7 | 2.07 | 0.69 |
| -6 | 8  | 7  | 2.10 | 0.59 |
| -6 | -8 | -7 | 0.70 | 1.05 |
| -6 | -8 | -7 | 1.71 | 0.88 |
| -6 | 8  | 7  | 1.72 | 0.59 |
| -6 | -8 | -7 | 1.73 | 0.45 |
| -6 | 8  | 7  | 0.70 | 0.72 |
| -6 | 8  | 7  | 2.11 | 0.62 |
| -6 | -8 | -7 | 1.38 | 0.88 |
| -6 | 8  | 7  | 1.64 | 0.65 |
| -6 | 8  | 7  | 0.77 | 0.63 |
| -6 | 8  | 7  | 1.02 | 0.84 |
| -6 | -8 | -7 | 2.38 | 0.64 |
| -6 | -8 | -7 | 1.36 | 0.66 |
| 6  | -8 | 7  | 1.68 | 0.60 |
| -6 | 8  | -7 | 2.10 | 0.65 |
| 6  | 8  | 7  | 1.75 | 0.48 |
| -6 | -8 | 7  | 1.70 | 0.89 |
| -6 | -8 | 7  | 1.93 | 0.42 |

## CIF S3

|    |    |    |       |      |
|----|----|----|-------|------|
| -6 | -8 | 7  | 1.37  | 0.79 |
| -6 | -8 | 7  | 1.66  | 0.43 |
| -6 | -8 | 7  | 1.89  | 0.41 |
| -6 | 8  | -7 | 2.82  | 1.05 |
| -6 | 8  | -7 | 2.16  | 0.69 |
| -7 | -8 | -7 | 1.84  | 0.53 |
| -7 | 8  | 7  | 4.08  | 0.75 |
| -7 | 8  | 7  | 3.29  | 0.87 |
| -7 | -8 | -7 | 4.52  | 1.22 |
| -7 | 8  | 7  | 3.32  | 0.87 |
| -7 | 8  | 7  | 3.54  | 0.71 |
| -7 | 8  | 7  | 1.89  | 0.51 |
| -7 | -8 | -7 | 1.63  | 0.54 |
| -7 | -8 | -7 | 1.66  | 0.54 |
| 7  | -8 | 7  | 2.53  | 0.55 |
| -7 | -8 | 7  | 3.28  | 0.81 |
| -7 | 8  | -7 | 2.35  | 0.60 |
| -7 | 8  | -7 | 3.78  | 0.69 |
| -7 | 8  | -7 | 1.87  | 0.94 |
| -7 | 8  | -7 | 2.40  | 0.63 |
| -8 | 8  | 7  | 0.60  | 0.36 |
| -8 | -8 | -7 | 1.15  | 0.41 |
| -8 | 8  | 7  | 1.04  | 0.32 |
| -8 | 8  | 7  | 0.87  | 0.33 |
| -8 | -8 | -7 | 0.70  | 0.34 |
| -8 | -8 | -7 | 1.02  | 0.40 |
| 8  | -8 | 7  | 1.13  | 0.36 |
| -8 | 8  | -7 | 0.92  | 0.39 |
| -8 | 8  | -7 | 0.49  | 0.48 |
| -8 | 8  | -7 | 0.48  | 0.66 |
| 0  | -9 | 7  | 14.77 | 1.17 |
| 0  | -9 | 7  | 14.88 | 1.18 |
| 0  | 9  | -7 | 13.32 | 1.54 |
| 0  | 9  | 7  | 14.33 | 1.17 |
| 0  | 9  | -7 | 13.28 | 1.40 |
| 0  | -9 | 7  | 14.01 | 1.21 |
| 0  | 9  | -7 | 12.87 | 1.34 |
| 0  | -9 | 7  | 12.53 | 1.35 |
| 1  | 9  | -7 | 16.58 | 1.47 |
| 1  | -9 | 7  | 15.24 | 1.28 |
| 1  | -9 | 7  | 14.70 | 1.29 |

## CIF S3

|    |    |    |       |      |
|----|----|----|-------|------|
| 1  | -9 | 7  | 16.89 | 1.31 |
| 1  | 9  | -7 | 12.89 | 1.37 |
| 1  | -9 | 7  | 14.93 | 1.23 |
| 1  | 9  | -7 | 12.83 | 1.49 |
| -1 | 9  | 7  | 14.32 | 1.19 |
| 1  | 9  | 7  | 15.34 | 1.21 |
| -1 | -9 | 7  | 17.07 | 1.19 |
| -1 | 9  | -7 | 12.97 | 1.42 |
| -1 | -9 | 7  | 14.14 | 1.39 |
| -1 | -9 | 7  | 16.61 | 1.28 |
| -1 | -9 | 7  | 14.86 | 1.22 |
| -1 | 9  | -7 | 11.55 | 1.37 |
| -1 | -9 | 7  | 14.17 | 1.28 |
| -2 | 9  | 7  | 0.61  | 0.67 |
| -2 | 9  | 7  | 1.37  | 0.71 |
| -2 | -9 | -7 | 1.22  | 0.76 |
| 2  | -9 | 7  | 2.23  | 0.90 |
| -2 | -9 | -7 | -0.18 | 0.91 |
| 2  | -9 | 7  | 1.45  | 0.86 |
| 2  | 9  | -7 | -0.01 | 0.85 |
| 2  | -9 | 7  | 0.56  | 0.83 |
| -2 | -9 | 7  | 0.56  | 0.60 |
| -2 | -9 | 7  | 0.79  | 0.36 |
| -2 | -9 | 7  | 1.80  | 0.83 |
| -2 | 9  | -7 | -0.24 | 0.80 |
| -2 | -9 | 7  | 1.88  | 0.87 |
| -2 | -9 | 7  | -0.05 | 0.83 |
| -2 | -9 | 7  | 0.43  | 0.72 |
| 3  | 9  | -7 | 5.71  | 1.08 |
| -3 | -9 | -7 | 7.02  | 1.02 |
| -3 | 9  | 7  | 5.36  | 0.93 |
| -3 | 9  | 7  | 7.33  | 1.01 |
| -3 | -9 | -7 | 6.16  | 1.06 |
| -3 | -9 | -7 | 5.67  | 1.44 |
| 3  | -9 | 7  | 5.50  | 1.25 |
| 3  | -9 | 7  | 6.13  | 1.06 |
| -3 | -9 | -7 | 5.60  | 1.28 |
| 3  | -9 | -7 | 3.00  | 1.40 |
| -3 | -9 | 7  | 6.43  | 1.19 |
| -3 | -9 | 7  | 6.15  | 0.93 |
| -3 | 9  | -7 | 6.92  | 1.43 |

## CIF S3

|    |    |    |       |      |
|----|----|----|-------|------|
| -3 | 9  | -7 | 6.25  | 1.03 |
| -3 | -9 | 7  | 6.46  | 1.12 |
| -3 | -9 | 7  | 7.83  | 0.64 |
| -3 | 9  | -7 | 5.42  | 1.16 |
| -3 | -9 | 7  | 8.03  | 1.42 |
| -4 | -9 | -7 | 25.40 | 1.59 |
| -4 | 9  | 7  | 23.65 | 1.65 |
| -4 | -9 | -7 | 24.00 | 1.75 |
| -4 | 9  | 7  | 21.43 | 1.80 |
| -4 | 9  | 7  | 20.97 | 1.65 |
| -4 | 9  | 7  | 25.53 | 1.60 |
| -4 | -9 | -7 | 28.48 | 2.06 |
| -4 | -9 | -7 | 24.31 | 1.43 |
| -4 | -9 | -7 | 24.03 | 1.55 |
| -4 | -9 | -7 | 23.89 | 1.84 |
| 4  | -9 | 7  | 25.04 | 1.78 |
| -4 | 9  | 7  | 23.71 | 1.59 |
| -4 | 9  | 7  | 22.95 | 1.23 |
| 4  | 9  | 7  | 23.31 | 1.47 |
| -4 | -9 | 7  | 21.93 | 1.40 |
| -4 | -9 | 7  | 23.44 | 1.46 |
| -4 | -9 | 7  | 27.81 | 2.20 |
| -4 | 9  | -7 | 23.89 | 1.82 |
| -4 | 9  | -7 | 23.74 | 1.74 |
| -4 | -9 | 7  | 24.17 | 1.35 |
| -4 | -9 | 7  | 21.77 | 1.41 |
| -4 | -9 | 7  | 25.31 | 1.70 |
| -4 | -9 | 7  | 26.03 | 1.59 |
| -4 | -9 | 7  | 23.57 | 1.37 |
| -5 | -9 | -7 | 7.75  | 1.28 |
| -5 | 9  | 7  | 6.18  | 0.93 |
| -5 | -9 | -7 | 7.55  | 1.37 |
| -5 | -9 | -7 | 7.25  | 1.02 |
| -5 | 9  | 7  | 7.89  | 1.11 |
| -5 | 9  | 7  | 6.23  | 1.32 |
| -5 | -9 | -7 | 7.93  | 0.99 |
| -5 | 9  | 7  | 6.58  | 1.37 |
| -5 | 9  | 7  | 7.13  | 0.99 |
| -5 | 9  | 7  | 7.24  | 1.05 |
| -5 | 9  | 7  | 4.62  | 1.05 |
| 5  | -9 | 7  | 7.30  | 0.91 |

## CIF S3

|    |    |    |       |      |
|----|----|----|-------|------|
| -5 | -9 | -7 | 7.21  | 1.05 |
| -5 | -9 | 7  | 6.81  | 1.14 |
| -5 | -9 | 7  | 6.74  | 0.69 |
| 5  | 9  | 7  | 8.21  | 1.05 |
| -5 | -9 | 7  | 7.15  | 0.70 |
| -5 | -9 | 7  | 7.87  | 0.57 |
| -5 | -9 | 7  | 10.68 | 1.32 |
| -6 | 9  | 7  | 3.21  | 0.90 |
| 6  | -9 | 7  | 3.18  | 0.73 |
| -6 | -9 | -7 | 4.83  | 0.93 |
| -6 | -9 | -7 | 1.54  | 0.89 |
| -6 | 9  | 7  | 4.07  | 0.71 |
| -6 | 9  | 7  | 1.97  | 0.61 |
| -6 | 9  | 7  | 2.92  | 0.60 |
| -6 | 9  | 7  | 3.77  | 0.96 |
| -6 | 9  | 7  | 2.59  | 0.78 |
| -6 | -9 | -7 | 3.65  | 0.93 |
| -6 | 9  | 7  | 3.11  | 0.84 |
| -6 | -9 | -7 | 3.05  | 0.80 |
| -6 | -9 | -7 | 3.28  | 0.80 |
| -6 | -9 | -7 | 4.08  | 0.94 |
| -6 | -9 | 7  | 3.11  | 0.82 |
| -6 | 9  | -7 | 3.95  | 1.09 |
| -6 | 9  | -7 | 3.68  | 0.75 |
| -6 | -9 | 7  | 4.91  | 1.13 |
| -6 | 9  | -7 | 2.85  | 0.78 |
| -6 | -9 | 7  | 4.55  | 0.52 |
| -6 | -9 | 7  | 3.56  | 0.44 |
| -7 | 9  | 7  | 1.04  | 0.44 |
| -7 | -9 | -7 | 0.55  | 0.46 |
| -7 | 9  | 7  | 0.66  | 0.44 |
| -7 | -9 | -7 | 0.77  | 0.70 |
| -7 | 9  | 7  | 2.51  | 0.70 |
| -7 | 9  | 7  | 1.67  | 0.43 |
| 7  | -9 | 7  | 1.99  | 0.61 |
| -7 | -9 | -7 | 1.47  | 0.49 |
| -7 | -9 | -7 | 1.22  | 0.48 |
| -7 | 9  | 7  | 1.83  | 0.54 |
| -7 | 9  | -7 | 0.99  | 0.56 |
| -7 | 9  | -7 | 1.76  | 0.42 |
| -7 | 9  | -7 | 1.24  | 0.80 |

## CIF S3

|    |     |    |       |      |
|----|-----|----|-------|------|
| -7 | -9  | 7  | 1.10  | 0.66 |
| -7 | 9   | -7 | 1.77  | 0.55 |
| -8 | -9  | -7 | 6.01  | 1.08 |
| -8 | 9   | 7  | 5.45  | 0.51 |
| -8 | -9  | -7 | 5.99  | 0.52 |
| -8 | -9  | -7 | 5.59  | 0.58 |
| -8 | -9  | -7 | 6.34  | 0.62 |
| -8 | 9   | 7  | 5.92  | 0.55 |
| -8 | 9   | 7  | 6.43  | 0.47 |
| -8 | 9   | -7 | 5.27  | 0.64 |
| -8 | 9   | -7 | 6.02  | 0.54 |
| -8 | 9   | -7 | 3.29  | 0.63 |
| 0  | 10  | -7 | 12.98 | 1.46 |
| 0  | 10  | 7  | 15.15 | 1.28 |
| 0  | -10 | 7  | 14.65 | 1.48 |
| 0  | 10  | -7 | 14.76 | 2.02 |
| 0  | -10 | 7  | 16.73 | 1.29 |
| 0  | -10 | 7  | 17.27 | 1.32 |
| 0  | -10 | 7  | 16.05 | 1.24 |
| 1  | -10 | 7  | 13.90 | 1.42 |
| -1 | 10  | 7  | 12.29 | 1.15 |
| 1  | -10 | 7  | 11.81 | 1.30 |
| 1  | -10 | 7  | 12.38 | 1.23 |
| 1  | -10 | 7  | 12.21 | 1.24 |
| -1 | -10 | -7 | 11.90 | 1.43 |
| -1 | -10 | 7  | 10.78 | 1.32 |
| -1 | -10 | 7  | 12.84 | 1.08 |
| -1 | -10 | 7  | 12.79 | 1.23 |
| -1 | -10 | 7  | 15.10 | 1.39 |
| -1 | -10 | 7  | 13.05 | 1.14 |
| 1  | -10 | -7 | 12.19 | 1.54 |
| -1 | -10 | 7  | 14.49 | 1.53 |
| 1  | 10  | 7  | 13.32 | 1.27 |
| -2 | -10 | -7 | 13.65 | 1.24 |
| -2 | 10  | 7  | 12.47 | 1.19 |
| -2 | -10 | -7 | 10.10 | 1.21 |
| -2 | 10  | 7  | 12.37 | 1.23 |
| 2  | -10 | 7  | 16.58 | 1.59 |
| 2  | -10 | 7  | 14.68 | 1.17 |
| 2  | -10 | 7  | 10.98 | 1.26 |
| 2  | -10 | 7  | 12.31 | 1.35 |

## CIF S3

|    |     |    |       |      |
|----|-----|----|-------|------|
| -2 | -10 | -7 | 12.51 | 1.88 |
| -2 | 10  | 7  | 10.22 | 2.26 |
| 2  | -10 | 7  | 8.64  | 1.77 |
| -2 | -10 | 7  | 12.56 | 1.18 |
| -2 | -10 | 7  | 16.74 | 1.64 |
| -2 | -10 | 7  | 13.82 | 1.02 |
| 2  | 10  | 7  | 13.39 | 1.24 |
| -2 | -10 | 7  | 11.42 | 1.61 |
| -2 | -10 | 7  | 11.01 | 1.33 |
| -2 | -10 | 7  | 12.62 | 1.35 |
| -2 | -10 | 7  | 10.89 | 1.36 |
| 2  | -10 | -7 | 9.60  | 1.62 |
| -2 | -10 | 7  | 9.22  | 0.71 |
| 3  | -10 | 7  | 24.71 | 1.81 |
| 3  | -10 | 7  | 24.34 | 1.67 |
| -3 | 10  | 7  | 22.99 | 1.61 |
| -3 | -10 | -7 | 23.49 | 1.95 |
| -3 | -10 | -7 | 24.96 | 1.61 |
| -3 | 10  | 7  | 21.13 | 1.60 |
| 3  | -10 | 7  | 23.80 | 1.69 |
| 3  | -10 | 7  | 24.37 | 1.69 |
| -3 | -10 | -7 | 23.42 | 1.60 |
| -3 | 10  | 7  | 24.62 | 1.69 |
| -3 | -10 | -7 | 21.61 | 1.63 |
| -3 | -10 | -7 | 24.95 | 1.71 |
| -3 | 10  | 7  | 24.51 | 1.64 |
| -3 | 10  | 7  | 23.48 | 1.43 |
| -3 | 10  | 7  | 23.30 | 1.88 |
| -3 | -10 | 7  | 26.23 | 1.51 |
| -3 | -10 | 7  | 24.59 | 1.54 |
| -3 | -10 | 7  | 25.42 | 1.46 |
| 3  | 10  | 7  | 22.96 | 1.50 |
| -3 | 10  | -7 | 26.87 | 1.79 |
| -3 | -10 | 7  | 26.33 | 1.78 |
| -3 | -10 | 7  | 29.26 | 1.81 |
| -3 | 10  | -7 | 25.75 | 1.90 |
| -3 | -10 | 7  | 25.61 | 1.51 |
| 3  | -10 | -7 | 23.07 | 1.98 |
| -4 | -10 | -7 | 5.32  | 1.04 |
| -4 | -10 | -7 | 4.99  | 1.06 |
| -4 | 10  | 7  | 4.55  | 1.02 |

## CIF S3

|    |     |    |      |      |
|----|-----|----|------|------|
| -4 | -10 | -7 | 5.32 | 1.29 |
| -4 | 10  | 7  | 5.16 | 1.06 |
| -4 | -10 | -7 | 4.96 | 1.09 |
| -4 | -10 | -7 | 6.20 | 1.48 |
| -4 | -10 | -7 | 5.72 | 1.20 |
| -4 | -10 | -7 | 5.37 | 1.25 |
| -4 | 10  | 7  | 4.48 | 1.06 |
| -4 | 10  | 7  | 5.11 | 0.97 |
| -4 | -10 | 7  | 5.44 | 1.14 |
| -4 | -10 | 7  | 5.35 | 0.78 |
| -4 | -10 | 7  | 4.49 | 1.08 |
| -4 | -10 | 7  | 5.12 | 0.67 |
| 4  | -10 | -7 | 2.05 | 0.98 |
| -4 | -10 | 7  | 5.43 | 0.82 |
| -4 | -10 | 7  | 5.22 | 1.22 |
| -4 | -10 | 7  | 4.50 | 0.78 |
| -4 | -10 | 7  | 4.33 | 0.78 |
| -5 | 10  | 7  | 3.62 | 0.96 |
| -5 | -10 | -7 | 1.82 | 0.75 |
| -5 | -10 | -7 | 4.40 | 1.43 |
| -5 | 10  | 7  | 2.84 | 0.67 |
| -5 | -10 | -7 | 3.51 | 0.95 |
| -5 | 10  | 7  | 2.97 | 0.93 |
| -5 | -10 | -7 | 3.20 | 0.74 |
| -5 | -10 | -7 | 4.99 | 1.17 |
| -5 | 10  | 7  | 3.22 | 0.82 |
| -5 | 10  | 7  | 3.15 | 0.70 |
| -5 | 10  | 7  | 2.29 | 0.76 |
| -5 | -10 | -7 | 3.54 | 0.71 |
| -5 | -10 | -7 | 3.81 | 0.96 |
| -5 | -10 | 7  | 2.32 | 0.73 |
| -5 | -10 | 7  | 3.59 | 0.56 |
| -5 | -10 | 7  | 3.39 | 0.43 |
| -5 | -10 | 7  | 1.45 | 0.86 |
| 5  | -10 | -7 | 1.42 | 1.27 |
| -6 | 10  | 7  | 1.53 | 0.57 |
| -6 | -10 | -7 | 1.16 | 0.58 |
| -6 | -10 | -7 | 0.86 | 0.51 |
| -6 | 10  | 7  | 1.54 | 0.55 |
| -6 | 10  | 7  | 0.94 | 0.47 |
| -6 | 10  | 7  | 0.38 | 0.47 |



## CIF S3

|    |     |    |       |      |
|----|-----|----|-------|------|
| -6 | -10 | -7 | 0.16  | 0.57 |
| -6 | 10  | 7  | 0.19  | 0.50 |
| -6 | 10  | 7  | 0.82  | 0.50 |
| -6 | -10 | -7 | 1.43  | 0.57 |
| -6 | -10 | -7 | 0.68  | 0.94 |
| -6 | -10 | -7 | 1.87  | 0.60 |
| -6 | 10  | 7  | 0.88  | 0.61 |
| -6 | 10  | -7 | 1.46  | 0.43 |
| -6 | -10 | 7  | 0.88  | 0.38 |
| -6 | 10  | -7 | 1.09  | 0.89 |
| -6 | -10 | 7  | 0.79  | 0.25 |
| -6 | -10 | 7  | 0.57  | 1.17 |
| -6 | -10 | 7  | 0.25  | 0.71 |
| -6 | -10 | 7  | 1.70  | 0.33 |
| 0  | -11 | -7 | -0.24 | 0.71 |
| 0  | -11 | -7 | -1.08 | 0.90 |
| 0  | -11 | 7  | 0.25  | 0.73 |
| 0  | -11 | 7  | -1.24 | 0.62 |
| 0  | -11 | 7  | -0.38 | 0.76 |
| 0  | -11 | 7  | 0.29  | 0.75 |
| 0  | 11  | 7  | 0.35  | 0.64 |
| 0  | -11 | 7  | 0.12  | 0.74 |
| 0  | -11 | 7  | -0.28 | 0.86 |
| 0  | -11 | 7  | 0.62  | 0.83 |
| 0  | 11  | 7  | 1.17  | 0.78 |
| 0  | -11 | 7  | -0.02 | 0.91 |
| 0  | -11 | -7 | -1.20 | 1.00 |
| 1  | -11 | 7  | 14.24 | 1.28 |
| -1 | -11 | -7 | 15.55 | 1.53 |
| -1 | 11  | 7  | 14.14 | 1.29 |
| -1 | 11  | 7  | 13.05 | 1.18 |
| 1  | -11 | 7  | 14.41 | 1.45 |
| 1  | -11 | 7  | 14.61 | 1.25 |
| 1  | -11 | 7  | 12.99 | 1.35 |
| -1 | -11 | -7 | 12.39 | 0.91 |
| 1  | -11 | 7  | 12.19 | 1.66 |
| 1  | -11 | 7  | 11.45 | 1.14 |
| -1 | -11 | -7 | 11.17 | 1.27 |
| 1  | -11 | 7  | 12.99 | 1.39 |
| 1  | -11 | 7  | 9.30  | 1.24 |
| -1 | -11 | -7 | 12.25 | 1.36 |

## CIF S3

|    |     |    |       |      |
|----|-----|----|-------|------|
| -1 | -11 | 7  | 13.30 | 1.13 |
| 1  | -11 | -7 | 10.82 | 1.32 |
| 1  | 11  | 7  | 11.03 | 1.15 |
| -1 | -11 | 7  | 12.18 | 1.20 |
| 1  | -11 | -7 | 10.99 | 1.13 |
| -1 | -11 | 7  | 11.64 | 1.23 |
| -1 | -11 | 7  | 11.95 | 1.25 |
| -1 | -11 | 7  | 12.21 | 1.00 |
| -1 | -11 | 7  | 12.14 | 1.32 |
| -1 | -11 | 7  | 13.48 | 1.18 |
| 1  | 11  | 7  | 9.35  | 1.45 |
| -1 | -11 | 7  | 13.86 | 1.27 |
| 1  | -11 | -7 | 13.67 | 1.61 |
| -1 | -11 | 7  | 10.88 | 1.20 |
| -2 | 11  | 7  | 3.72  | 0.87 |
| -2 | 11  | 7  | 2.54  | 0.94 |
| 2  | -11 | 7  | 1.18  | 0.50 |
| -2 | -11 | -7 | 1.46  | 0.49 |
| 2  | -11 | 7  | 1.81  | 0.90 |
| 2  | -11 | 7  | 2.81  | 0.89 |
| -2 | -11 | -7 | 1.95  | 0.90 |
| 2  | -11 | 7  | 2.49  | 0.87 |
| 2  | -11 | 7  | 1.38  | 0.93 |
| -2 | -11 | -7 | 2.79  | 0.91 |
| 2  | -11 | 7  | 0.89  | 0.76 |
| -2 | -11 | 7  | 2.02  | 0.75 |
| 2  | 11  | 7  | 1.64  | 0.57 |
| -2 | -11 | 7  | 2.25  | 0.65 |
| -2 | -11 | 7  | 2.97  | 0.64 |
| -2 | -11 | 7  | 1.47  | 0.80 |
| -2 | -11 | 7  | 3.30  | 0.92 |
| -2 | -11 | 7  | 1.56  | 0.65 |
| -2 | -11 | 7  | 3.36  | 1.01 |
| 2  | -11 | -7 | 1.47  | 0.76 |
| -2 | -11 | 7  | 3.59  | 0.88 |
| -3 | -11 | -7 | 2.98  | 0.89 |
| -3 | 11  | 7  | 3.97  | 1.00 |
| -3 | -11 | -7 | 3.24  | 0.85 |
| 3  | -11 | 7  | 4.61  | 1.25 |
| 3  | -11 | 7  | 2.71  | 0.91 |
| -3 | -11 | -7 | 2.53  | 0.87 |

## CIF S3

|    |     |    |       |      |
|----|-----|----|-------|------|
| -3 | 11  | 7  | 2.98  | 0.78 |
| -3 | 11  | 7  | 4.24  | 0.72 |
| -3 | 11  | 7  | 4.25  | 1.02 |
| 3  | -11 | 7  | 5.41  | 1.10 |
| -3 | 11  | 7  | 2.88  | 0.99 |
| -3 | -11 | 7  | 3.68  | 0.85 |
| -3 | -11 | 7  | 4.82  | 1.25 |
| -3 | -11 | 7  | 3.81  | 0.93 |
| -3 | -11 | 7  | 5.01  | 0.82 |
| -3 | -11 | 7  | 3.17  | 0.81 |
| -3 | -11 | 7  | 2.96  | 0.73 |
| 3  | -11 | -7 | 4.57  | 1.26 |
| -4 | 11  | 7  | 1.13  | 0.93 |
| -4 | 11  | 7  | 0.65  | 0.64 |
| -4 | -11 | -7 | 0.33  | 0.75 |
| -4 | 11  | 7  | 0.79  | 0.69 |
| -4 | -11 | -7 | 0.86  | 0.59 |
| 4  | -11 | 7  | 0.57  | 0.75 |
| -4 | -11 | -7 | -0.43 | 0.73 |
| -4 | -11 | -7 | 1.28  | 0.77 |
| -4 | -11 | -7 | 0.35  | 0.45 |
| -4 | 11  | 7  | 1.89  | 0.63 |
| -4 | -11 | 7  | -0.10 | 0.63 |
| -4 | -11 | 7  | 1.22  | 0.64 |
| -4 | -11 | 7  | 1.65  | 0.79 |
| 4  | -11 | -7 | 1.10  | 0.79 |
| -4 | -11 | 7  | 0.17  | 0.43 |
| -4 | -11 | 7  | 1.02  | 0.86 |
| -4 | -11 | 7  | 0.56  | 0.49 |
| -4 | -11 | 7  | 0.55  | 0.38 |
| 5  | -11 | 7  | 1.12  | 1.05 |
| -5 | -11 | -7 | 0.54  | 0.41 |
| -5 | 11  | 7  | 1.31  | 0.54 |
| -5 | -11 | -7 | 2.21  | 0.66 |
| -5 | -11 | -7 | 1.78  | 0.64 |
| -5 | 11  | 7  | 1.38  | 0.62 |
| -5 | -11 | -7 | 1.95  | 0.90 |
| -5 | -11 | -7 | 1.56  | 0.38 |
| -5 | 11  | 7  | 1.57  | 0.59 |
| -5 | 11  | 7  | 1.61  | 0.82 |
| -5 | 11  | 7  | 1.59  | 0.55 |

## CIF S3

|    |     |    |       |      |
|----|-----|----|-------|------|
| -5 | -11 | -7 | 1.33  | 0.67 |
| -5 | -11 | -7 | 2.08  | 0.66 |
| -5 | -11 | 7  | 2.52  | 0.90 |
| -5 | -11 | 7  | 3.03  | 0.74 |
| -5 | -11 | 7  | 2.63  | 0.55 |
| -5 | -11 | 7  | 1.87  | 0.67 |
| 5  | -11 | -7 | 1.43  | 0.76 |
| -6 | -11 | -7 | 0.77  | 0.52 |
| -6 | -11 | -7 | 3.48  | 0.76 |
| -6 | 11  | 7  | 1.28  | 0.43 |
| -6 | 11  | 7  | 3.68  | 0.72 |
| -6 | 11  | 7  | 2.88  | 0.67 |
| -6 | -11 | -7 | 2.96  | 1.08 |
| -6 | -11 | -7 | 1.71  | 0.50 |
| -6 | 11  | 7  | 2.43  | 0.63 |
| -6 | 11  | 7  | 2.94  | 0.71 |
| -6 | 11  | 7  | 2.94  | 0.61 |
| -6 | 11  | -7 | 4.07  | 1.17 |
| 6  | -11 | -7 | 3.09  | 0.95 |
| -6 | -11 | 7  | 5.11  | 0.97 |
| -6 | -11 | 7  | 3.01  | 0.33 |
| -6 | -11 | 7  | 2.66  | 0.35 |
| -6 | -11 | 7  | 3.36  | 0.32 |
| -6 | 11  | -7 | 2.86  | 0.47 |
| -7 | 11  | 7  | 2.32  | 0.39 |
| -7 | 11  | 7  | 2.13  | 0.42 |
| -7 | 11  | 7  | 3.20  | 0.50 |
| -7 | -11 | -7 | 3.05  | 0.53 |
| -7 | -11 | -7 | 2.29  | 0.65 |
| -7 | -11 | -7 | 2.41  | 0.44 |
| -7 | 11  | 7  | 2.81  | 0.45 |
| -7 | 11  | -7 | 0.86  | 0.32 |
| 0  | -12 | 7  | -0.31 | 0.50 |
| 0  | -12 | 7  | -0.79 | 0.67 |
| 0  | -12 | -7 | -1.50 | 0.88 |
| 0  | -12 | 7  | 1.48  | 0.70 |
| 0  | -12 | 7  | -0.33 | 0.80 |
| 0  | -12 | 7  | -0.59 | 0.64 |
| 0  | 12  | 7  | 0.05  | 0.59 |
| 0  | -12 | 7  | -0.28 | 0.74 |
| 0  | -12 | 7  | -1.24 | 0.76 |

## CIF S3

|    |     |    |       |      |
|----|-----|----|-------|------|
| 0  | -12 | -7 | -0.08 | 0.44 |
| 0  | -12 | 7  | 0.77  | 0.71 |
| 1  | -12 | 7  | 0.53  | 0.79 |
| 1  | -12 | 7  | 1.05  | 0.75 |
| 1  | -12 | 7  | -0.29 | 0.77 |
| 1  | -12 | 7  | 0.57  | 0.78 |
| 1  | -12 | 7  | -0.18 | 0.79 |
| 1  | -12 | 7  | 0.44  | 0.72 |
| -1 | 12  | 7  | 0.17  | 0.55 |
| 1  | -12 | 7  | 1.22  | 0.79 |
| -1 | -12 | -7 | 0.03  | 0.86 |
| 1  | -12 | 7  | 0.31  | 0.48 |
| 1  | 12  | 7  | 0.93  | 0.61 |
| 1  | -12 | -7 | 0.42  | 0.70 |
| -1 | -12 | 7  | 0.81  | 0.64 |
| -1 | -12 | 7  | 0.90  | 0.83 |
| -1 | -12 | 7  | 0.45  | 0.62 |
| -1 | -12 | 7  | 1.08  | 0.70 |
| -1 | -12 | 7  | 0.78  | 0.42 |
| -1 | -12 | 7  | 0.90  | 0.82 |
| -1 | -12 | 7  | 1.44  | 0.69 |
| 1  | -12 | -7 | 0.01  | 0.86 |
| -1 | -12 | 7  | 0.87  | 0.67 |
| 2  | -12 | 7  | 8.26  | 1.22 |
| 2  | -12 | 7  | 7.27  | 1.09 |
| -2 | -12 | -7 | 7.20  | 1.14 |
| 2  | -12 | 7  | 8.97  | 1.09 |
| 2  | -12 | 7  | 8.61  | 1.07 |
| -2 | -12 | -7 | 8.09  | 1.20 |
| -2 | -12 | -7 | 7.55  | 1.10 |
| -2 | 12  | 7  | 6.86  | 1.44 |
| 2  | -12 | 7  | 6.58  | 1.41 |
| 2  | -12 | 7  | 8.00  | 1.14 |
| 2  | -12 | 7  | 7.61  | 1.28 |
| -2 | 12  | 7  | 7.50  | 1.02 |
| 2  | -12 | -7 | 7.59  | 1.18 |
| 2  | -12 | -7 | 7.00  | 1.11 |
| -2 | -12 | 7  | 6.82  | 0.96 |
| -2 | -12 | 7  | 6.64  | 0.86 |
| -2 | -12 | 7  | 7.42  | 0.99 |
| -2 | -12 | 7  | 6.56  | 0.87 |

## CIF S3

|    |     |    |       |      |
|----|-----|----|-------|------|
| -2 | -12 | 7  | 6.22  | 1.15 |
| -3 | -12 | -7 | 2.89  | 1.18 |
| -3 | 12  | 7  | 3.29  | 0.93 |
| -3 | 12  | 7  | 2.63  | 0.53 |
| -3 | 12  | 7  | 5.04  | 1.29 |
| -3 | -12 | -7 | 2.13  | 0.77 |
| 3  | -12 | 7  | 1.85  | 0.83 |
| -3 | -12 | -7 | 3.68  | 0.91 |
| -3 | -12 | -7 | 4.04  | 0.94 |
| -3 | 12  | 7  | 2.65  | 0.61 |
| -3 | -12 | -7 | 1.76  | 0.77 |
| 3  | -12 | 7  | 3.76  | 0.93 |
| 3  | -12 | 7  | 2.46  | 0.87 |
| -3 | 12  | 7  | 2.78  | 0.77 |
| -3 | -12 | 7  | 3.20  | 0.71 |
| 3  | -12 | -7 | 3.08  | 0.83 |
| -3 | -12 | 7  | 3.80  | 0.84 |
| -3 | -12 | 7  | 1.52  | 0.88 |
| 3  | -12 | -7 | 3.46  | 0.85 |
| -4 | 12  | 7  | 0.33  | 0.54 |
| -4 | 12  | 7  | 1.23  | 0.65 |
| -4 | -12 | -7 | 0.21  | 0.59 |
| -4 | -12 | -7 | 0.10  | 0.41 |
| -4 | -12 | -7 | 0.77  | 0.67 |
| -4 | -12 | -7 | 0.61  | 0.51 |
| -4 | 12  | 7  | -0.28 | 0.83 |
| -4 | 12  | 7  | 0.60  | 0.59 |
| -4 | -12 | -7 | 0.61  | 0.68 |
| -4 | -12 | 7  | 1.06  | 0.36 |
| 4  | -12 | -7 | 0.62  | 0.56 |
| -4 | -12 | 7  | 0.80  | 0.44 |
| -4 | -12 | 7  | 0.46  | 0.51 |
| -5 | 12  | 7  | 1.74  | 0.60 |
| -5 | 12  | 7  | 0.26  | 0.40 |
| -5 | 12  | 7  | 1.32  | 0.52 |
| -5 | -12 | -7 | 1.91  | 0.92 |
| -5 | -12 | -7 | 1.13  | 0.55 |
| -5 | -12 | -7 | 0.56  | 0.54 |
| -5 | 12  | 7  | 2.13  | 0.56 |
| -5 | -12 | -7 | 0.60  | 0.51 |
| -5 | 12  | -7 | 1.12  | 0.41 |

## CIF S3

|    |     |    |       |      |
|----|-----|----|-------|------|
| -5 | -12 | 7  | 1.45  | 0.32 |
| 5  | -12 | -7 | 1.45  | 0.51 |
| -6 | -12 | -7 | 0.04  | 0.33 |
| -6 | 12  | 7  | -0.07 | 0.31 |
| -6 | 12  | 7  | -0.06 | 0.34 |
| -6 | -12 | -7 | -0.12 | 0.26 |
| -6 | -12 | -7 | 0.32  | 0.39 |
| -6 | -12 | -7 | 0.22  | 0.39 |
| -6 | 12  | 7  | 1.03  | 0.37 |
| -6 | 12  | 7  | 0.63  | 0.29 |
| -6 | 12  | 7  | 0.10  | 0.31 |
| 6  | -12 | -7 | 0.51  | 0.33 |
| -6 | 12  | -7 | 0.61  | 0.65 |
| 0  | -13 | 7  | 0.80  | 0.66 |
| 0  | -13 | 7  | 0.52  | 0.46 |
| 0  | 13  | 7  | 1.13  | 0.52 |
| 0  | -13 | 7  | 0.33  | 0.66 |
| 0  | -13 | 7  | 1.20  | 0.63 |
| 0  | -13 | 7  | 0.35  | 0.45 |
| 0  | -13 | 7  | 0.62  | 0.58 |
| 0  | -13 | 7  | 0.59  | 0.81 |
| 0  | -13 | -7 | 0.47  | 0.74 |
| 1  | -13 | 7  | 3.51  | 0.84 |
| 1  | -13 | 7  | 3.32  | 1.14 |
| 1  | -13 | 7  | 2.10  | 0.79 |
| -1 | -13 | -7 | 1.44  | 0.72 |
| -1 | 13  | 7  | 2.93  | 0.59 |
| 1  | -13 | 7  | 2.47  | 0.73 |
| 1  | -13 | 7  | 0.80  | 0.62 |
| 1  | -13 | 7  | 4.10  | 0.87 |
| -1 | -13 | 7  | 0.93  | 0.56 |
| -1 | -13 | 7  | 1.69  | 0.62 |
| -1 | -13 | 7  | 3.40  | 0.85 |
| -1 | -13 | 7  | 0.78  | 0.56 |
| 1  | -13 | -7 | 2.25  | 0.73 |
| -1 | -13 | 7  | 3.07  | 1.31 |
| -1 | -13 | 7  | 3.95  | 0.79 |
| -1 | -13 | 7  | 3.57  | 1.05 |
| 2  | -13 | 7  | 1.57  | 0.84 |
| -2 | 13  | 7  | 2.58  | 0.62 |
| 2  | -13 | 7  | 3.93  | 0.83 |

## CIF S3

|    |     |    |       |      |
|----|-----|----|-------|------|
| -2 | -13 | -7 | 4.41  | 1.05 |
| 2  | -13 | 7  | 2.08  | 0.75 |
| -2 | 13  | 7  | 1.55  | 0.83 |
| -2 | 13  | 7  | 3.68  | 0.77 |
| -2 | -13 | -7 | 1.58  | 0.71 |
| -2 | -13 | -7 | 2.64  | 0.77 |
| 2  | -13 | 7  | 1.44  | 0.60 |
| 2  | -13 | 7  | 2.41  | 0.77 |
| -2 | -13 | 7  | 3.01  | 0.75 |
| -2 | -13 | 7  | 2.30  | 0.84 |
| -2 | -13 | 7  | 4.10  | 0.79 |
| 2  | -13 | -7 | 4.19  | 0.90 |
| 2  | -13 | -7 | 4.03  | 0.76 |
| -2 | -13 | 7  | 2.26  | 0.51 |
| -3 | -13 | -7 | 0.70  | 0.63 |
| -3 | 13  | 7  | -0.85 | 0.79 |
| -3 | -13 | -7 | 0.14  | 0.58 |
| -3 | 13  | 7  | 0.40  | 0.78 |
| -3 | -13 | -7 | 0.15  | 0.40 |
| 3  | -13 | 7  | -0.37 | 0.71 |
| -3 | -13 | -7 | 0.31  | 0.51 |
| 3  | -13 | 7  | 0.01  | 0.67 |
| -3 | 13  | 7  | 0.24  | 0.48 |
| -3 | -13 | 7  | 0.31  | 0.40 |
| -3 | -13 | 7  | 0.14  | 0.42 |
| 3  | -13 | -7 | 0.78  | 0.52 |
| -3 | -13 | 7  | -0.01 | 0.45 |
| -4 | 13  | 7  | 0.63  | 0.43 |
| -4 | -13 | -7 | 1.85  | 0.66 |
| -4 | -13 | -7 | 0.98  | 0.50 |
| -4 | -13 | -7 | 0.85  | 0.72 |
| -4 | 13  | 7  | 1.97  | 0.67 |
| -4 | 13  | 7  | 1.38  | 0.53 |
| 4  | -13 | -7 | 3.02  | 0.81 |
| -4 | -13 | 7  | 0.81  | 0.40 |
| -4 | -13 | 7  | 2.31  | 0.43 |
| -4 | -13 | 7  | 1.09  | 0.35 |
| -5 | 13  | 7  | 0.11  | 0.31 |
| -5 | -13 | -7 | 0.70  | 0.41 |
| 0  | -14 | 7  | 0.67  | 0.67 |
| 0  | -14 | 7  | 1.87  | 0.92 |



## CIF S3

|    |     |    |       |      |
|----|-----|----|-------|------|
| 0  | -14 | 7  | 0.94  | 0.47 |
| 0  | -14 | 7  | 2.14  | 0.72 |
| 0  | -14 | 7  | 1.86  | 0.57 |
| 0  | -14 | -7 | 1.14  | 0.73 |
| 0  | -14 | 7  | 0.81  | 0.48 |
| 1  | -14 | 7  | -0.31 | 0.75 |
| 1  | -14 | 7  | 0.21  | 0.45 |
| 1  | -14 | 7  | 0.38  | 0.48 |
| -1 | 14  | 7  | -0.05 | 0.37 |
| -1 | -14 | -7 | 0.10  | 0.69 |
| 1  | -14 | 7  | 0.00  | 0.58 |
| -1 | 14  | 7  | -0.22 | 0.48 |
| -1 | -14 | 7  | 0.13  | 0.58 |
| -1 | -14 | 7  | -0.18 | 0.48 |
| -1 | -14 | 7  | 0.11  | 0.45 |
| -1 | -14 | 7  | 0.57  | 0.71 |
| 1  | -14 | -7 | -0.18 | 0.73 |
| -1 | -14 | 7  | 0.04  | 0.41 |
| -1 | -14 | 7  | -0.26 | 0.37 |
| -2 | -14 | -7 | 4.46  | 0.76 |
| -2 | 14  | 7  | 5.58  | 0.69 |
| 2  | -14 | 7  | 7.73  | 0.88 |
| 2  | -14 | 7  | 4.21  | 0.89 |
| 2  | -14 | 7  | 6.92  | 0.77 |
| -2 | -14 | -7 | 4.68  | 0.86 |
| -2 | 14  | 7  | 5.56  | 1.02 |
| -2 | 14  | 7  | 6.69  | 0.46 |
| -2 | -14 | 7  | 5.85  | 0.69 |
| -2 | -14 | 7  | 6.41  | 0.68 |
| -2 | -14 | 7  | 6.97  | 1.07 |
| 2  | -14 | -7 | 4.12  | 0.83 |
| -3 | -14 | -7 | -0.01 | 0.46 |
| 3  | -14 | 7  | -0.45 | 0.65 |
| -3 | 14  | 7  | -0.12 | 0.35 |
| -3 | 14  | 7  | 0.13  | 0.54 |
| 3  | -14 | 7  | 0.12  | 0.44 |
| -3 | -14 | 7  | -0.18 | 0.35 |
| -3 | -14 | 7  | 0.17  | 0.30 |
| 0  | 0   | -8 | 32.27 | 2.13 |
| 0  | 0   | -8 | 32.76 | 1.78 |
| 0  | 0   | -8 | 27.98 | 2.03 |

## CIF S3

|    |   |    |        |      |
|----|---|----|--------|------|
| 0  | 0 | -8 | 26.78  | 1.79 |
| 1  | 0 | -8 | 1.20   | 0.69 |
| -1 | 0 | -8 | 0.53   | 0.73 |
| 1  | 0 | 8  | 1.20   | 0.37 |
| -1 | 0 | 8  | -0.28  | 0.52 |
| 1  | 0 | 8  | 0.19   | 0.82 |
| -1 | 0 | -8 | 0.48   | 0.66 |
| -1 | 0 | -8 | 0.12   | 0.24 |
| -1 | 0 | -8 | 1.13   | 0.56 |
| -1 | 0 | -8 | 0.88   | 0.76 |
| 1  | 0 | -8 | -0.26  | 0.62 |
| -1 | 0 | -8 | 1.32   | 0.62 |
| 1  | 0 | -8 | 1.39   | 0.64 |
| 1  | 0 | -8 | 1.35   | 0.55 |
| -2 | 0 | -8 | 4.34   | 0.77 |
| -2 | 0 | -8 | 5.09   | 0.85 |
| -2 | 0 | 8  | 4.26   | 0.87 |
| -2 | 0 | 8  | 4.49   | 0.43 |
| -2 | 0 | -8 | 3.97   | 0.78 |
| 2  | 0 | 8  | 3.74   | 1.24 |
| -2 | 0 | -8 | 6.47   | 1.19 |
| 2  | 0 | 8  | 3.19   | 1.09 |
| 2  | 0 | -8 | 4.67   | 0.54 |
| 2  | 0 | -8 | 5.40   | 0.86 |
| 2  | 0 | -8 | 5.81   | 0.70 |
| 2  | 0 | -8 | 5.51   | 0.77 |
| -2 | 0 | -8 | 4.40   | 0.67 |
| 2  | 0 | 8  | 4.54   | 0.57 |
| -2 | 0 | -8 | 4.36   | 1.16 |
| 3  | 0 | 8  | 140.06 | 7.38 |
| -3 | 0 | 8  | 142.78 | 7.28 |
| 3  | 0 | -8 | 156.92 | 7.45 |
| -3 | 0 | 8  | 153.37 | 7.30 |
| 3  | 0 | -8 | 146.24 | 7.38 |
| -3 | 0 | 8  | 160.72 | 7.53 |
| -3 | 0 | -8 | 149.49 | 7.54 |
| 3  | 0 | -8 | 154.16 | 7.38 |
| 3  | 0 | -8 | 148.87 | 7.34 |
| 3  | 0 | 8  | 159.48 | 8.14 |
| -3 | 0 | -8 | 132.82 | 7.94 |
| -3 | 0 | -8 | 149.80 | 7.48 |

## CIF S3

|     |    |    |       |      |
|-----|----|----|-------|------|
| -4  | 0  | 8  | 47.08 | 2.44 |
| 4   | 0  | -8 | 49.81 | 2.53 |
| 4   | 0  | 8  | 47.49 | 2.68 |
| -4  | 0  | -8 | 48.42 | 2.69 |
| 4   | 0  | -8 | 52.07 | 2.48 |
| -4  | 0  | 8  | 47.78 | 2.42 |
| 4   | 0  | -8 | 46.40 | 2.59 |
| -4  | 0  | -8 | 51.33 | 2.81 |
| 5   | 0  | -8 | 7.08  | 0.61 |
| -5  | 0  | -8 | 8.27  | 1.04 |
| 5   | 0  | 8  | 8.63  | 1.00 |
| 5   | 0  | -8 | 7.73  | 0.59 |
| -5  | 0  | 8  | 7.73  | 0.97 |
| -5  | 0  | 8  | 8.53  | 0.53 |
| -5  | 0  | -8 | 9.12  | 1.33 |
| -6  | 0  | -8 | 3.39  | 0.77 |
| 6   | 0  | 8  | 5.44  | 0.86 |
| -6  | 0  | 8  | 4.56  | 0.41 |
| -6  | 0  | -8 | 2.69  | 0.88 |
| -6  | 0  | 8  | 4.27  | 0.84 |
| -7  | 0  | 8  | 9.92  | 0.63 |
| -7  | 0  | -8 | 11.82 | 1.01 |
| -7  | 0  | -8 | 12.23 | 0.99 |
| -8  | 0  | -8 | 3.10  | 0.71 |
| -8  | 0  | -8 | 1.35  | 0.62 |
| -8  | 0  | -8 | 1.86  | 0.50 |
| -8  | 0  | -8 | 1.37  | 0.50 |
| -8  | 0  | -8 | 1.53  | 0.84 |
| -8  | 0  | -8 | 2.68  | 0.58 |
| -9  | 0  | -8 | 1.18  | 0.82 |
| -9  | 0  | -8 | 0.32  | 0.39 |
| -9  | 0  | -8 | 1.01  | 0.40 |
| -9  | 0  | -8 | 1.57  | 0.41 |
| -9  | 0  | -8 | 2.73  | 0.65 |
| -9  | 0  | -8 | 1.75  | 0.46 |
| -10 | 0  | -8 | 0.74  | 0.24 |
| -10 | 0  | -8 | 0.62  | 0.27 |
| 10  | 0  | 8  | 0.84  | 0.39 |
| -10 | 0  | -8 | 2.15  | 0.48 |
| 0   | -1 | -8 | 8.21  | 0.96 |
| 0   | -1 | -8 | 9.05  | 1.25 |

## CIF S3

|    |    |    |       |      |
|----|----|----|-------|------|
| 0  | 1  | -8 | 8.16  | 0.94 |
| 0  | 1  | -8 | 8.03  | 1.21 |
| 0  | 1  | -8 | 8.84  | 0.82 |
| 0  | -1 | -8 | 8.52  | 0.85 |
| 0  | 1  | -8 | 10.39 | 1.17 |
| 0  | 1  | -8 | 8.91  | 1.10 |
| 0  | -1 | -8 | 9.13  | 1.24 |
| -1 | -1 | -8 | 37.09 | 2.17 |
| 1  | 1  | -8 | 33.70 | 1.95 |
| -1 | 1  | 8  | 35.95 | 2.06 |
| -1 | -1 | -8 | 31.93 | 2.41 |
| -1 | -1 | -8 | 30.24 | 2.28 |
| 1  | 1  | -8 | 35.83 | 2.23 |
| -1 | 1  | 8  | 36.15 | 2.25 |
| -1 | -1 | -8 | 36.28 | 2.07 |
| 1  | 1  | -8 | 35.12 | 2.02 |
| 1  | -1 | 8  | 38.58 | 2.46 |
| 1  | -1 | 8  | 35.14 | 1.88 |
| -1 | -1 | -8 | 33.41 | 2.41 |
| 1  | 1  | -8 | 39.22 | 2.32 |
| 1  | -1 | -8 | 35.29 | 2.10 |
| -1 | 1  | -8 | 36.27 | 2.43 |
| -1 | 1  | -8 | 34.72 | 2.33 |
| 1  | 1  | 8  | 37.34 | 2.53 |
| -1 | 1  | -8 | 34.51 | 2.07 |
| 1  | 1  | 8  | 32.09 | 1.85 |
| 1  | -1 | -8 | 37.05 | 2.38 |
| -1 | 1  | -8 | 37.42 | 2.02 |
| 1  | -1 | -8 | 33.56 | 1.99 |
| -1 | -1 | 8  | 40.18 | 2.23 |
| 1  | -1 | -8 | 33.49 | 2.31 |
| -1 | 1  | -8 | 35.37 | 2.39 |
| -1 | 1  | -8 | 33.80 | 2.00 |
| 2  | -1 | 8  | 17.29 | 1.12 |
| 2  | 1  | -8 | 18.77 | 1.22 |
| -2 | -1 | -8 | 18.73 | 1.75 |
| -2 | -1 | -8 | 17.88 | 1.75 |
| -2 | 1  | 8  | 19.47 | 1.03 |
| -2 | -1 | -8 | 17.91 | 1.32 |
| -2 | 1  | 8  | 20.36 | 1.30 |
| -2 | -1 | -8 | 19.52 | 1.33 |

## CIF S3

|    |    |    |       |      |
|----|----|----|-------|------|
| 2  | -1 | 8  | 18.51 | 1.80 |
| 2  | -1 | 8  | 15.57 | 1.77 |
| 2  | 1  | -8 | 18.70 | 1.36 |
| 2  | 1  | -8 | 17.84 | 1.15 |
| 2  | 1  | -8 | 18.48 | 1.08 |
| -2 | 1  | 8  | 17.43 | 1.41 |
| -2 | 1  | -8 | 18.01 | 1.28 |
| -2 | 1  | -8 | 19.06 | 1.26 |
| 2  | 1  | 8  | 18.84 | 1.10 |
| -2 | -1 | 8  | 19.85 | 1.37 |
| -2 | 1  | -8 | 17.28 | 1.11 |
| 2  | 1  | 8  | 20.05 | 1.91 |
| -2 | 1  | -8 | 17.30 | 1.73 |
| 2  | -1 | -8 | 19.47 | 1.25 |
| 2  | -1 | -8 | 17.63 | 1.30 |
| -2 | 1  | -8 | 16.76 | 1.57 |
| 2  | 1  | 8  | 17.46 | 1.80 |
| 2  | -1 | -8 | 19.64 | 1.12 |
| 2  | -1 | -8 | 20.66 | 1.50 |
| -2 | 1  | -8 | 18.32 | 1.33 |
| -2 | -1 | 8  | 18.80 | 1.01 |
| -3 | -1 | -8 | 24.00 | 1.55 |
| -3 | -1 | -8 | 24.63 | 1.66 |
| 3  | 1  | -8 | 26.19 | 1.32 |
| 3  | -1 | 8  | 20.53 | 2.16 |
| 3  | 1  | -8 | 24.93 | 1.40 |
| 3  | -1 | 8  | 21.37 | 1.42 |
| -3 | 1  | 8  | 22.66 | 1.63 |
| 3  | 1  | -8 | 26.21 | 1.45 |
| -3 | 1  | 8  | 24.23 | 1.29 |
| -3 | -1 | -8 | 22.99 | 2.07 |
| 3  | 1  | 8  | 22.80 | 1.39 |
| 3  | -1 | -8 | 24.96 | 1.49 |
| -3 | 1  | -8 | 24.77 | 1.59 |
| -3 | -1 | 8  | 24.14 | 1.23 |
| 3  | 1  | 8  | 25.49 | 2.27 |
| -3 | -1 | 8  | 26.38 | 1.27 |
| -3 | -1 | 8  | 25.91 | 1.51 |
| -3 | 1  | -8 | 24.82 | 1.65 |
| 3  | -1 | -8 | 25.47 | 1.45 |
| 3  | 1  | 8  | 26.08 | 1.56 |

## CIF S3

|    |    |    |       |      |
|----|----|----|-------|------|
| 3  | -1 | -8 | 25.35 | 1.38 |
| -3 | 1  | -8 | 24.34 | 1.46 |
| -3 | 1  | -8 | 26.51 | 2.40 |
| -3 | 1  | -8 | 25.71 | 2.10 |
| 3  | -1 | -8 | 25.71 | 1.57 |
| 4  | 1  | -8 | 40.20 | 2.03 |
| -4 | 1  | 8  | 40.53 | 2.06 |
| 4  | -1 | 8  | 33.70 | 3.22 |
| -4 | -1 | -8 | 45.44 | 2.31 |
| 4  | -1 | 8  | 37.48 | 2.17 |
| -4 | 1  | 8  | 41.88 | 2.03 |
| -4 | -1 | -8 | 38.74 | 2.39 |
| 4  | -1 | 8  | 40.78 | 2.29 |
| -4 | -1 | 8  | 38.65 | 2.02 |
| 4  | -1 | -8 | 41.94 | 2.10 |
| 4  | 1  | 8  | 40.92 | 2.30 |
| -4 | 1  | -8 | 42.35 | 2.46 |
| -4 | -1 | 8  | 40.62 | 2.00 |
| -4 | 1  | -8 | 37.43 | 3.26 |
| 4  | -1 | -8 | 40.47 | 2.14 |
| -4 | 1  | -8 | 42.28 | 2.31 |
| 4  | -1 | -8 | 38.84 | 2.22 |
| 4  | -1 | -8 | 38.71 | 2.27 |
| -4 | 1  | -8 | 39.08 | 2.20 |
| -5 | 1  | 8  | 5.95  | 0.85 |
| 5  | -1 | 8  | 6.97  | 0.87 |
| -5 | 1  | 8  | 6.97  | 0.53 |
| -5 | -1 | -8 | 5.91  | 0.99 |
| -5 | 1  | 8  | 7.05  | 0.61 |
| 5  | 1  | -8 | 6.96  | 0.49 |
| -5 | 1  | -8 | 8.30  | 1.32 |
| 5  | -1 | -8 | 7.09  | 0.64 |
| 5  | -1 | -8 | 6.03  | 0.65 |
| 5  | 1  | 8  | 6.09  | 0.85 |
| -5 | -1 | 8  | 7.19  | 0.44 |
| -5 | -1 | 8  | 6.14  | 0.82 |
| -5 | 1  | -8 | 7.60  | 0.99 |
| -6 | -1 | -8 | 6.83  | 1.03 |
| -6 | -1 | -8 | 9.76  | 0.94 |
| 6  | -1 | 8  | 10.07 | 1.12 |
| -6 | 1  | 8  | 10.73 | 0.66 |

## CIF S3

|     |    |    |       |      |
|-----|----|----|-------|------|
| -6  | -1 | -8 | 8.41  | 0.86 |
| -6  | 1  | -8 | 10.72 | 1.34 |
| -6  | -1 | 8  | 9.94  | 0.55 |
| 6   | 1  | 8  | 10.54 | 1.10 |
| -6  | 1  | -8 | 10.95 | 1.05 |
| -6  | 1  | -8 | 9.76  | 0.94 |
| -7  | -1 | -8 | 4.91  | 1.31 |
| -7  | -1 | -8 | 3.77  | 0.80 |
| -7  | -1 | -8 | 2.81  | 0.69 |
| -7  | 1  | 8  | 3.58  | 0.47 |
| -7  | -1 | -8 | 5.46  | 0.85 |
| -7  | 1  | -8 | 5.55  | 0.82 |
| -8  | -1 | -8 | 3.46  | 0.73 |
| -8  | -1 | -8 | 4.58  | 1.34 |
| -8  | -1 | -8 | 3.94  | 0.72 |
| -8  | -1 | -8 | 2.18  | 0.99 |
| -8  | -1 | -8 | 4.51  | 0.76 |
| -8  | -1 | -8 | 2.92  | 0.59 |
| -8  | -1 | -8 | 4.19  | 0.79 |
| -8  | -1 | -8 | 4.58  | 0.80 |
| -8  | 1  | -8 | 4.04  | 0.76 |
| -8  | 1  | -8 | 4.13  | 0.88 |
| -8  | 1  | -8 | 4.38  | 0.96 |
| -8  | 1  | -8 | 2.51  | 0.63 |
| -8  | 1  | -8 | 4.38  | 0.80 |
| -8  | 1  | -8 | 3.46  | 0.98 |
| -8  | 1  | -8 | 4.87  | 0.84 |
| -9  | -1 | -8 | 0.31  | 0.42 |
| -9  | -1 | -8 | 0.34  | 0.38 |
| -9  | -1 | -8 | 0.71  | 0.41 |
| -9  | -1 | -8 | 0.56  | 0.72 |
| -9  | -1 | -8 | -0.15 | 0.37 |
| -9  | 1  | -8 | 0.64  | 0.44 |
| -9  | 1  | -8 | 0.03  | 0.80 |
| -9  | 1  | -8 | 0.21  | 0.40 |
| -9  | 1  | -8 | 0.08  | 0.42 |
| -9  | 1  | -8 | 0.60  | 0.44 |
| -9  | 1  | -8 | 0.46  | 0.40 |
| 10  | -1 | 8  | 0.28  | 0.37 |
| -10 | -1 | -8 | 0.45  | 0.23 |
| -10 | -1 | -8 | 0.27  | 0.24 |

## CIF S3

|     |    |    |       |      |
|-----|----|----|-------|------|
| -10 | -1 | -8 | 0.49  | 0.28 |
| -10 | 1  | -8 | 0.54  | 0.26 |
| -10 | 1  | -8 | 0.36  | 0.28 |
| -10 | 1  | -8 | 0.16  | 0.28 |
| 0   | -2 | 8  | 50.41 | 2.69 |
| 0   | 2  | -8 | 56.27 | 2.83 |
| 0   | 2  | 8  | 50.71 | 3.25 |
| 0   | -2 | -8 | 54.65 | 3.29 |
| 0   | 2  | -8 | 56.58 | 3.17 |
| 0   | -2 | -8 | 44.44 | 3.19 |
| 0   | -2 | -8 | 51.45 | 2.85 |
| 0   | 2  | -8 | 54.69 | 2.88 |
| 0   | 2  | -8 | 57.17 | 3.14 |
| 0   | 2  | 8  | 49.72 | 2.70 |
| 0   | 2  | -8 | 58.42 | 3.26 |
| 0   | -2 | -8 | 54.99 | 2.94 |
| -1  | -2 | -8 | 49.99 | 3.22 |
| -1  | 2  | 8  | 59.04 | 3.00 |
| -1  | -2 | -8 | 59.66 | 3.17 |
| 1   | 2  | -8 | 60.19 | 3.16 |
| -1  | -2 | -8 | 59.28 | 3.60 |
| 1   | 2  | -8 | 59.51 | 3.09 |
| 1   | 2  | -8 | 61.11 | 3.36 |
| 1   | -2 | 8  | 64.93 | 3.56 |
| 1   | 2  | -8 | 63.91 | 3.37 |
| -1  | -2 | -8 | 50.94 | 3.54 |
| 1   | -2 | 8  | 56.46 | 3.03 |
| -1  | 2  | -8 | 62.47 | 3.54 |
| 1   | -2 | -8 | 65.22 | 3.56 |
| -1  | -2 | 8  | 59.81 | 3.02 |
| 1   | -2 | -8 | 62.65 | 3.17 |
| 1   | 2  | 8  | 60.13 | 3.02 |
| -1  | 2  | -8 | 55.84 | 3.46 |
| 1   | -2 | -8 | 54.82 | 3.49 |
| 1   | 2  | 8  | 54.42 | 3.61 |
| -1  | 2  | -8 | 66.26 | 3.65 |
| -1  | 2  | -8 | 58.70 | 3.15 |
| 1   | -2 | -8 | 57.02 | 3.20 |
| -1  | 2  | -8 | 61.46 | 3.16 |
| -1  | 2  | -8 | 58.99 | 3.23 |
| -1  | -2 | 8  | 65.18 | 3.36 |



## CIF S3

|    |    |    |       |      |
|----|----|----|-------|------|
| -2 | -2 | -8 | 15.03 | 1.15 |
| 2  | 2  | -8 | 15.62 | 0.95 |
| 2  | 2  | -8 | 15.00 | 1.23 |
| 2  | 2  | -8 | 15.86 | 1.08 |
| 2  | -2 | 8  | 13.69 | 1.03 |
| -2 | 2  | 8  | 15.95 | 1.37 |
| -2 | 2  | 8  | 16.08 | 0.91 |
| -2 | -2 | -8 | 12.10 | 1.51 |
| 2  | -2 | 8  | 14.29 | 1.72 |
| 2  | 2  | -8 | 16.62 | 1.03 |
| -2 | -2 | -8 | 14.29 | 1.64 |
| -2 | 2  | 8  | 16.27 | 1.22 |
| -2 | -2 | 8  | 16.54 | 0.88 |
| 2  | -2 | -8 | 17.30 | 1.11 |
| -2 | 2  | -8 | 14.81 | 1.18 |
| 2  | 2  | 8  | 16.61 | 1.80 |
| 2  | -2 | -8 | 13.88 | 1.45 |
| -2 | 2  | -8 | 13.78 | 1.58 |
| -2 | 2  | -8 | 13.55 | 1.20 |
| -2 | 2  | -8 | 16.71 | 1.58 |
| 2  | -2 | -8 | 16.67 | 1.28 |
| 2  | 2  | 8  | 15.61 | 0.98 |
| 2  | -2 | -8 | 16.29 | 1.16 |
| -2 | 2  | -8 | 15.62 | 1.05 |
| 2  | 2  | 8  | 15.45 | 1.59 |
| -2 | 2  | -8 | 15.25 | 1.22 |
| -2 | -2 | 8  | 17.40 | 1.25 |
| -3 | 2  | 8  | 46.66 | 2.58 |
| 3  | 2  | -8 | 50.01 | 2.65 |
| -3 | 2  | 8  | 53.72 | 2.74 |
| -3 | 2  | 8  | 44.58 | 2.88 |
| 3  | 2  | -8 | 49.99 | 2.56 |
| 3  | -2 | 8  | 53.10 | 3.42 |
| -3 | -2 | -8 | 53.23 | 2.78 |
| -3 | -2 | -8 | 46.05 | 3.25 |
| 3  | -2 | 8  | 48.43 | 2.67 |
| -3 | 2  | 8  | 50.82 | 2.56 |
| 3  | 2  | 8  | 56.51 | 3.55 |
| 3  | 2  | 8  | 48.25 | 2.63 |
| 3  | -2 | -8 | 53.27 | 2.75 |
| -3 | 2  | -8 | 47.71 | 2.81 |

## CIF S3

|    |    |    |       |      |
|----|----|----|-------|------|
| -3 | 2  | -8 | 53.41 | 2.69 |
| 3  | -2 | -8 | 53.31 | 2.84 |
| -3 | -2 | 8  | 50.04 | 2.71 |
| -3 | -2 | 8  | 51.68 | 2.48 |
| -3 | -2 | 8  | 51.46 | 2.57 |
| 3  | -2 | -8 | 50.22 | 2.71 |
| -3 | -2 | 8  | 49.82 | 2.53 |
| 3  | 2  | 8  | 50.78 | 2.75 |
| -3 | -2 | 8  | 51.82 | 2.48 |
| -3 | -2 | 8  | 53.06 | 2.52 |
| -3 | 2  | -8 | 49.12 | 2.73 |
| -4 | 2  | 8  | 16.16 | 1.10 |
| 4  | -2 | 8  | 19.85 | 1.30 |
| -4 | -2 | -8 | 18.95 | 1.37 |
| -4 | 2  | 8  | 20.37 | 1.11 |
| -4 | 2  | 8  | 21.38 | 1.31 |
| -4 | -2 | -8 | 21.22 | 1.44 |
| 4  | 2  | -8 | 20.58 | 1.07 |
| -4 | 2  | 8  | 18.42 | 1.15 |
| -4 | 2  | -8 | 20.51 | 1.37 |
| 4  | -2 | -8 | 20.93 | 1.25 |
| 4  | -2 | -8 | 18.11 | 1.48 |
| 4  | -2 | -8 | 19.95 | 1.21 |
| -4 | 2  | -8 | 20.48 | 2.01 |
| -4 | 2  | -8 | 21.46 | 1.33 |
| 4  | -2 | -8 | 19.59 | 1.39 |
| -4 | -2 | 8  | 19.96 | 1.04 |
| -4 | 2  | -8 | 20.38 | 1.64 |
| 4  | 2  | 8  | 20.16 | 1.35 |
| -5 | 2  | 8  | -0.07 | 0.65 |
| 5  | -2 | 8  | 0.29  | 0.69 |
| -5 | 2  | 8  | 0.45  | 0.40 |
| -5 | -2 | -8 | 0.19  | 0.55 |
| -5 | -2 | -8 | 0.64  | 0.75 |
| -5 | -2 | -8 | 0.99  | 0.64 |
| 5  | 2  | -8 | -0.16 | 0.17 |
| -5 | 2  | 8  | 0.10  | 0.32 |
| -5 | -2 | -8 | 0.18  | 0.64 |
| 5  | -2 | -8 | 0.48  | 0.77 |
| 5  | -2 | -8 | 0.17  | 0.51 |
| -5 | 2  | -8 | 0.12  | 0.61 |

## CIF S3

|    |    |    |       |      |
|----|----|----|-------|------|
| 5  | -2 | -8 | 0.38  | 0.45 |
| 5  | 2  | 8  | 0.33  | 0.58 |
| -5 | 2  | -8 | 0.22  | 0.56 |
| -5 | 2  | -8 | 1.40  | 0.81 |
| -5 | -2 | 8  | 0.16  | 0.16 |
| -5 | -2 | 8  | -0.36 | 0.57 |
| -5 | 2  | -8 | 0.50  | 0.65 |
| 6  | -2 | 8  | 1.45  | 0.72 |
| -6 | -2 | -8 | 2.36  | 0.58 |
| -6 | 2  | 8  | 1.35  | 0.43 |
| -6 | -2 | -8 | 2.37  | 0.70 |
| -6 | 2  | 8  | 1.04  | 0.37 |
| 6  | 2  | 8  | 1.04  | 0.66 |
| -6 | 2  | -8 | 2.98  | 1.09 |
| -6 | 2  | -8 | 1.62  | 0.57 |
| -6 | 2  | -8 | 0.85  | 0.68 |
| -7 | -2 | -8 | 5.05  | 0.81 |
| -7 | -2 | -8 | 4.56  | 1.23 |
| -7 | -2 | -8 | 6.30  | 0.93 |
| -7 | 2  | 8  | 5.41  | 0.56 |
| -7 | -2 | -8 | 5.84  | 0.87 |
| -7 | -2 | -8 | 4.39  | 0.99 |
| -7 | -2 | -8 | 7.13  | 0.84 |
| -7 | -2 | -8 | 3.60  | 1.38 |
| -7 | -2 | -8 | 5.32  | 0.83 |
| -7 | 2  | 8  | 4.74  | 0.56 |
| -7 | 2  | 8  | 5.26  | 0.54 |
| -7 | 2  | -8 | 5.90  | 0.85 |
| -7 | 2  | -8 | 4.08  | 1.05 |
| -7 | 2  | -8 | 7.50  | 1.50 |
| -7 | 2  | -8 | 6.15  | 0.60 |
| -7 | 2  | -8 | 6.58  | 0.99 |
| -8 | -2 | -8 | 7.24  | 1.37 |
| -8 | 2  | 8  | 6.70  | 0.43 |
| -8 | -2 | -8 | 6.87  | 0.85 |
| -8 | -2 | -8 | 6.30  | 0.83 |
| -8 | 2  | 8  | 5.66  | 0.47 |
| -8 | -2 | -8 | 5.47  | 1.15 |
| -8 | -2 | -8 | 5.28  | 0.78 |
| -8 | -2 | -8 | 5.53  | 0.82 |
| -8 | -2 | -8 | 5.86  | 0.84 |

## CIF S3

|     |    |    |       |      |
|-----|----|----|-------|------|
| -8  | 2  | 8  | 5.84  | 0.44 |
| -8  | 2  | -8 | 5.09  | 0.75 |
| -8  | 2  | -8 | 7.60  | 0.82 |
| -8  | 2  | -8 | 8.06  | 0.85 |
| -8  | 2  | -8 | 6.12  | 0.89 |
| -8  | 2  | -8 | 6.72  | 0.94 |
| -8  | 2  | -8 | 6.11  | 1.36 |
| -9  | -2 | -8 | 7.32  | 0.66 |
| -9  | -2 | -8 | 8.23  | 0.79 |
| -9  | -2 | -8 | 9.87  | 0.77 |
| -9  | -2 | -8 | 10.09 | 1.17 |
| -9  | -2 | -8 | 7.68  | 1.20 |
| -9  | 2  | -8 | 7.87  | 0.82 |
| -9  | 2  | -8 | 7.60  | 0.77 |
| -9  | 2  | -8 | 8.15  | 0.77 |
| -9  | 2  | -8 | 8.15  | 0.70 |
| -9  | 2  | -8 | 7.74  | 1.15 |
| -9  | 2  | -8 | 6.63  | 0.72 |
| 10  | -2 | 8  | 0.31  | 0.37 |
| -10 | -2 | -8 | 0.43  | 0.23 |
| -10 | -2 | -8 | 0.32  | 0.27 |
| -10 | 2  | -8 | 0.23  | 0.28 |
| -10 | 2  | -8 | 0.11  | 0.40 |
| -10 | 2  | -8 | 0.04  | 0.29 |
| -10 | 2  | -8 | 0.00  | 0.29 |
| -10 | 2  | -8 | -0.08 | 0.24 |
| 0   | -3 | 8  | 54.31 | 2.92 |
| 0   | 3  | 8  | 57.57 | 2.94 |
| 0   | -3 | -8 | 58.20 | 3.54 |
| 0   | -3 | -8 | 61.10 | 3.14 |
| 0   | 3  | -8 | 52.88 | 3.33 |
| 0   | -3 | -8 | 52.70 | 3.19 |
| 0   | 3  | -8 | 60.71 | 3.07 |
| 0   | 3  | -8 | 63.04 | 3.51 |
| 0   | 3  | 8  | 63.22 | 3.62 |
| 0   | 3  | -8 | 59.53 | 3.13 |
| 0   | -3 | -8 | 46.19 | 3.47 |
| 0   | 3  | -8 | 63.07 | 3.40 |
| 1   | -3 | 8  | 37.16 | 2.00 |
| -1  | -3 | -8 | 31.53 | 2.15 |
| 1   | 3  | -8 | 40.01 | 2.08 |

## CIF S3

|    |    |    |       |      |
|----|----|----|-------|------|
| -1 | -3 | -8 | 34.57 | 2.14 |
| 1  | 3  | -8 | 39.90 | 2.15 |
| -1 | 3  | 8  | 37.57 | 1.96 |
| 1  | 3  | -8 | 38.62 | 2.37 |
| -1 | -3 | -8 | 36.70 | 2.63 |
| 1  | 3  | -8 | 36.37 | 2.32 |
| -1 | -3 | -8 | 37.50 | 2.66 |
| 1  | -3 | 8  | 43.92 | 3.17 |
| -1 | -3 | 8  | 37.27 | 1.94 |
| -1 | 3  | -8 | 42.29 | 2.25 |
| -1 | 3  | -8 | 42.72 | 2.69 |
| -1 | -3 | 8  | 40.13 | 2.34 |
| -1 | 3  | -8 | 39.16 | 2.14 |
| 1  | -3 | -8 | 30.23 | 2.56 |
| 1  | -3 | -8 | 34.95 | 2.58 |
| -1 | 3  | -8 | 41.51 | 2.56 |
| -1 | -3 | 8  | 39.77 | 1.97 |
| -1 | 3  | -8 | 38.88 | 2.53 |
| 1  | 3  | 8  | 36.07 | 1.99 |
| 1  | -3 | -8 | 38.20 | 2.16 |
| -1 | 3  | -8 | 36.49 | 2.15 |
| 1  | -3 | -8 | 32.56 | 2.23 |
| 2  | 3  | -8 | 8.48  | 0.70 |
| 2  | -3 | 8  | 5.17  | 1.47 |
| -2 | -3 | -8 | 7.28  | 0.93 |
| 2  | -3 | 8  | 7.72  | 0.79 |
| 2  | 3  | -8 | 8.28  | 0.80 |
| -2 | 3  | 8  | 8.24  | 1.06 |
| -2 | -3 | -8 | 7.92  | 1.35 |
| -2 | 3  | 8  | 10.61 | 1.82 |
| -2 | -3 | -8 | 10.23 | 1.31 |
| 2  | 3  | -8 | 7.94  | 0.68 |
| -2 | 3  | 8  | 7.64  | 0.64 |
| -2 | -3 | 8  | 9.03  | 0.57 |
| 2  | -3 | -8 | 8.77  | 0.91 |
| -2 | 3  | -8 | 9.26  | 1.44 |
| 2  | -3 | -8 | 8.71  | 1.01 |
| 2  | 3  | 8  | 6.61  | 1.23 |
| -2 | -3 | 8  | 9.61  | 1.03 |
| 2  | 3  | 8  | 8.09  | 0.68 |
| -2 | 3  | -8 | 9.41  | 0.93 |

## CIF S3

|    |    |    |       |      |
|----|----|----|-------|------|
| 2  | -3 | -8 | 9.72  | 1.11 |
| 2  | 3  | 8  | 7.64  | 1.51 |
| -2 | -3 | 8  | 8.64  | 0.59 |
| 2  | -3 | -8 | 7.19  | 1.32 |
| -2 | 3  | -8 | 9.07  | 0.97 |
| -2 | 3  | -8 | 8.06  | 0.77 |
| -3 | 3  | 8  | 28.29 | 1.80 |
| 3  | 3  | -8 | 27.14 | 1.50 |
| -3 | 3  | 8  | 26.78 | 1.91 |
| -3 | 3  | 8  | 27.89 | 1.55 |
| 3  | 3  | -8 | 27.86 | 1.60 |
| -3 | -3 | -8 | 26.40 | 2.21 |
| -3 | -3 | -8 | 27.51 | 1.72 |
| 3  | -3 | 8  | 28.36 | 1.64 |
| -3 | 3  | 8  | 24.84 | 1.49 |
| 3  | -3 | -8 | 30.74 | 1.81 |
| -3 | 3  | -8 | 27.08 | 1.72 |
| -3 | -3 | 8  | 27.58 | 1.45 |
| 3  | 3  | 8  | 28.38 | 2.44 |
| -3 | 3  | -8 | 29.41 | 1.80 |
| -3 | 3  | -8 | 30.26 | 2.40 |
| -3 | -3 | 8  | 28.09 | 1.38 |
| 3  | -3 | -8 | 28.11 | 1.70 |
| -3 | 3  | -8 | 30.67 | 1.64 |
| -3 | -3 | 8  | 25.29 | 1.48 |
| 3  | 3  | 8  | 28.94 | 1.68 |
| -3 | -3 | 8  | 28.74 | 1.38 |
| 3  | 3  | 8  | 28.82 | 1.57 |
| 3  | -3 | -8 | 26.59 | 1.88 |
| -3 | -3 | 8  | 28.37 | 1.44 |
| -4 | -3 | -8 | 12.75 | 1.08 |
| 4  | 3  | -8 | 11.86 | 0.69 |
| -4 | 3  | 8  | 11.34 | 0.82 |
| 4  | -3 | 8  | 9.92  | 0.94 |
| -4 | 3  | 8  | 13.00 | 1.06 |
| -4 | 3  | 8  | 11.31 | 0.76 |
| -4 | -3 | -8 | 10.24 | 1.06 |
| -4 | 3  | 8  | 10.30 | 0.98 |
| -4 | -3 | -8 | 10.69 | 1.11 |
| 4  | 3  | 8  | 10.91 | 1.01 |
| -4 | -3 | 8  | 10.60 | 0.63 |

## CIF S3

|    |    |    |       |      |
|----|----|----|-------|------|
| 4  | -3 | -8 | 11.69 | 1.09 |
| -4 | 3  | -8 | 10.28 | 1.19 |
| 4  | -3 | -8 | 10.12 | 0.93 |
| -4 | 3  | -8 | 10.65 | 1.04 |
| 4  | -3 | -8 | 9.72  | 1.25 |
| -4 | 3  | -8 | 9.55  | 0.95 |
| -5 | 3  | 8  | 1.61  | 0.56 |
| -5 | -3 | -8 | 2.33  | 0.72 |
| -5 | -3 | -8 | 2.05  | 0.54 |
| -5 | -3 | -8 | 2.56  | 0.83 |
| 5  | 3  | -8 | 2.41  | 0.31 |
| -5 | 3  | 8  | 2.54  | 0.62 |
| -5 | 3  | 8  | 1.83  | 0.42 |
| -5 | -3 | -8 | 2.06  | 0.65 |
| 5  | -3 | -8 | 2.23  | 0.67 |
| -5 | 3  | -8 | 2.74  | 0.63 |
| 5  | 3  | 8  | 2.90  | 0.84 |
| -5 | 3  | -8 | 2.42  | 1.01 |
| 5  | -3 | -8 | 2.15  | 0.84 |
| -5 | 3  | -8 | 2.33  | 0.76 |
| -5 | 3  | -8 | 2.80  | 0.74 |
| -5 | -3 | 8  | 2.55  | 0.29 |
| 5  | -3 | -8 | 2.00  | 0.93 |
| -6 | 3  | 8  | 6.78  | 0.69 |
| -6 | -3 | -8 | 5.38  | 0.96 |
| -6 | 3  | 8  | 7.95  | 0.80 |
| -6 | -3 | -8 | 8.32  | 0.84 |
| 6  | -3 | 8  | 9.52  | 1.12 |
| -6 | -3 | -8 | 6.32  | 1.06 |
| -6 | -3 | -8 | 7.77  | 0.92 |
| -6 | 3  | -8 | 9.14  | 1.46 |
| -6 | -3 | 8  | 9.81  | 1.18 |
| -6 | 3  | -8 | 8.78  | 1.08 |
| 6  | -3 | -8 | 7.78  | 1.08 |
| 6  | 3  | 8  | 7.56  | 1.12 |
| -6 | 3  | -8 | 8.08  | 0.88 |
| -7 | -3 | -8 | 8.04  | 0.94 |
| -7 | 3  | 8  | 8.16  | 0.71 |
| -7 | 3  | 8  | 7.73  | 0.70 |
| -7 | 3  | 8  | 8.75  | 0.60 |
| -7 | 3  | 8  | 8.25  | 0.76 |

## CIF S3

|     |    |    |       |      |
|-----|----|----|-------|------|
| -7  | -3 | -8 | 8.07  | 0.94 |
| -7  | -3 | -8 | 8.66  | 0.99 |
| -7  | -3 | -8 | 8.91  | 0.93 |
| -7  | -3 | -8 | 8.76  | 0.91 |
| -7  | -3 | -8 | 7.95  | 1.61 |
| -7  | -3 | -8 | 7.78  | 1.44 |
| -7  | -3 | -8 | 8.27  | 0.89 |
| -7  | 3  | -8 | 8.45  | 1.54 |
| -7  | 3  | -8 | 9.66  | 0.98 |
| -7  | 3  | -8 | 7.95  | 0.68 |
| -7  | 3  | -8 | 8.81  | 0.99 |
| -8  | -3 | -8 | 0.85  | 0.45 |
| -8  | -3 | -8 | -0.24 | 1.04 |
| -8  | -3 | -8 | 0.98  | 0.58 |
| -8  | 3  | 8  | 1.65  | 0.45 |
| -8  | 3  | 8  | 1.35  | 0.29 |
| -8  | -3 | -8 | 0.47  | 0.76 |
| -8  | -3 | -8 | 0.99  | 0.46 |
| -8  | -3 | -8 | 1.15  | 0.53 |
| -8  | -3 | -8 | 1.31  | 0.48 |
| -8  | 3  | -8 | 1.47  | 0.56 |
| -8  | 3  | -8 | 1.34  | 0.54 |
| -8  | 3  | -8 | 1.91  | 0.54 |
| -8  | 3  | -8 | 0.81  | 0.44 |
| -8  | 3  | -8 | 1.33  | 0.55 |
| -8  | 3  | -8 | 0.83  | 0.91 |
| -9  | -3 | -8 | 4.36  | 0.60 |
| 9   | -3 | 8  | 5.96  | 0.82 |
| -9  | -3 | -8 | 4.67  | 1.14 |
| -9  | -3 | -8 | 5.07  | 0.66 |
| -9  | -3 | -8 | 4.87  | 0.65 |
| -9  | 3  | -8 | 5.15  | 1.08 |
| -9  | 3  | -8 | 4.67  | 0.65 |
| -9  | 3  | -8 | 4.90  | 0.72 |
| -9  | 3  | -8 | 5.89  | 0.69 |
| -9  | 3  | -8 | 5.05  | 0.62 |
| -9  | 3  | -8 | 4.88  | 0.73 |
| -10 | -3 | -8 | 0.33  | 0.20 |
| -10 | -3 | -8 | 0.34  | 0.24 |
| 10  | -3 | 8  | 0.15  | 0.33 |
| -10 | 3  | -8 | 0.19  | 0.28 |



## CIF S3

|     |    |    |       |      |
|-----|----|----|-------|------|
| -10 | 3  | -8 | 0.32  | 0.24 |
| -10 | 3  | -8 | 0.35  | 0.34 |
| 0   | -4 | -8 | 26.70 | 2.01 |
| 0   | 4  | 8  | 30.66 | 1.60 |
| 0   | -4 | -8 | 28.52 | 1.91 |
| 0   | 4  | -8 | 29.49 | 1.74 |
| 0   | 4  | -8 | 32.75 | 2.14 |
| 0   | -4 | -8 | 28.59 | 2.32 |
| 0   | -4 | 8  | 28.75 | 1.59 |
| 0   | 4  | -8 | 29.27 | 1.75 |
| 0   | 4  | -8 | 29.57 | 1.81 |
| 0   | 4  | -8 | 29.64 | 2.26 |
| 1   | 4  | -8 | 71.21 | 3.52 |
| 1   | -4 | 8  | 64.26 | 3.45 |
| -1  | -4 | -8 | 67.36 | 3.58 |
| -1  | 4  | 8  | 67.30 | 3.42 |
| -1  | -4 | -8 | 61.15 | 4.08 |
| 1   | 4  | -8 | 71.86 | 3.62 |
| -1  | 4  | -8 | 70.36 | 4.11 |
| -1  | -4 | 8  | 66.06 | 3.41 |
| -1  | 4  | -8 | 68.92 | 3.60 |
| 1   | -4 | -8 | 63.32 | 4.07 |
| -1  | 4  | -8 | 70.46 | 3.72 |
| 1   | -4 | -8 | 68.34 | 3.74 |
| 1   | 4  | 8  | 68.76 | 3.46 |
| 1   | -4 | -8 | 65.84 | 3.61 |
| -1  | -4 | 8  | 69.64 | 3.83 |
| -1  | 4  | -8 | 73.38 | 3.60 |
| -2  | -4 | -8 | 8.67  | 1.42 |
| 2   | -4 | 8  | 9.51  | 0.88 |
| -2  | -4 | -8 | 9.13  | 1.11 |
| 2   | 4  | -8 | 10.56 | 0.80 |
| -2  | 4  | 8  | 9.84  | 0.81 |
| -2  | 4  | 8  | 9.93  | 0.74 |
| 2   | 4  | -8 | 10.21 | 0.90 |
| 2   | 4  | -8 | 11.08 | 0.82 |
| 2   | -4 | 8  | 11.33 | 1.56 |
| -2  | 4  | -8 | 9.02  | 1.49 |
| -2  | 4  | -8 | 10.48 | 1.16 |
| 2   | -4 | -8 | 8.02  | 1.41 |
| 2   | -4 | -8 | 9.25  | 1.27 |

## CIF S3

|    |    |    |       |      |
|----|----|----|-------|------|
| -2 | 4  | -8 | 8.47  | 0.87 |
| -2 | 4  | -8 | 9.26  | 0.98 |
| -2 | -4 | 8  | 9.55  | 0.76 |
| -2 | -4 | 8  | 10.25 | 0.62 |
| -2 | -4 | 8  | 10.83 | 1.12 |
| 2  | -4 | -8 | 9.34  | 1.07 |
| 2  | 4  | 8  | 10.19 | 0.77 |
| -2 | -4 | 8  | 9.07  | 0.68 |
| 2  | 4  | 8  | 7.14  | 1.62 |
| -3 | 4  | 8  | 6.42  | 0.78 |
| 3  | -4 | 8  | 8.13  | 0.87 |
| 3  | 4  | -8 | 7.44  | 0.68 |
| -3 | -4 | -8 | 8.46  | 1.07 |
| 3  | 4  | -8 | 8.22  | 0.76 |
| 3  | -4 | 8  | 8.94  | 1.54 |
| -3 | -4 | -8 | 5.58  | 0.95 |
| -3 | -4 | -8 | 6.14  | 1.40 |
| 3  | 4  | -8 | 6.77  | 0.64 |
| -3 | 4  | 8  | 8.14  | 1.07 |
| -3 | 4  | -8 | 7.84  | 1.01 |
| -3 | -4 | 8  | 6.92  | 0.65 |
| 3  | 4  | 8  | 7.35  | 0.85 |
| -3 | -4 | 8  | 7.78  | 0.45 |
| -3 | -4 | 8  | 7.96  | 0.58 |
| 3  | 4  | 8  | 8.02  | 0.73 |
| 3  | -4 | -8 | 5.95  | 1.18 |
| 3  | -4 | -8 | 8.39  | 1.12 |
| -3 | 4  | -8 | 7.73  | 1.06 |
| -3 | -4 | 8  | 8.01  | 0.45 |
| -3 | 4  | -8 | 8.22  | 0.84 |
| -3 | 4  | -8 | 7.22  | 1.52 |
| -4 | 4  | 8  | 19.52 | 1.49 |
| -4 | 4  | 8  | 20.36 | 1.21 |
| 4  | -4 | 8  | 18.92 | 1.35 |
| -4 | -4 | -8 | 19.41 | 1.48 |
| -4 | -4 | -8 | 21.78 | 1.45 |
| -4 | -4 | -8 | 20.09 | 1.33 |
| -4 | -4 | 8  | 20.91 | 1.32 |
| 4  | -4 | -8 | 18.13 | 1.62 |
| -4 | 4  | -8 | 19.20 | 1.56 |
| -4 | -4 | 8  | 17.97 | 1.07 |

## CIF S3

|    |    |    |       |      |
|----|----|----|-------|------|
| 4  | -4 | -8 | 17.50 | 1.35 |
| -4 | -4 | 8  | 21.67 | 1.47 |
| -4 | -4 | 8  | 19.15 | 1.05 |
| 4  | -4 | -8 | 19.93 | 1.53 |
| 4  | 4  | 8  | 20.27 | 1.39 |
| -4 | 4  | -8 | 18.36 | 1.41 |
| -4 | 4  | -8 | 19.34 | 1.32 |
| -5 | 4  | 8  | 5.04  | 0.94 |
| 5  | 4  | -8 | 5.15  | 0.46 |
| -5 | 4  | 8  | 6.18  | 0.74 |
| -5 | 4  | 8  | 5.30  | 0.65 |
| -5 | -4 | -8 | 7.76  | 1.03 |
| -5 | -4 | -8 | 5.36  | 0.83 |
| -5 | -4 | -8 | 1.89  | 0.80 |
| -5 | -4 | -8 | 5.30  | 0.74 |
| -5 | 4  | -8 | 5.13  | 0.87 |
| 5  | -4 | -8 | 3.44  | 1.18 |
| -5 | 4  | -8 | 4.00  | 1.00 |
| -5 | 4  | -8 | 5.29  | 1.12 |
| 5  | 4  | 8  | 4.28  | 0.96 |
| 5  | -4 | -8 | 4.76  | 1.01 |
| -5 | 4  | -8 | 4.66  | 0.89 |
| -5 | -4 | 8  | 5.74  | 1.08 |
| 5  | -4 | -8 | 4.08  | 0.86 |
| -5 | -4 | 8  | 5.43  | 0.41 |
| -6 | -4 | -8 | 1.22  | 0.61 |
| -6 | 4  | 8  | 1.55  | 0.56 |
| -6 | -4 | -8 | -0.36 | 0.79 |
| -6 | -4 | -8 | 1.59  | 0.88 |
| -6 | -4 | -8 | 0.75  | 0.70 |
| -6 | -4 | -8 | 2.87  | 0.99 |
| -6 | 4  | 8  | 1.10  | 0.46 |
| -6 | -4 | -8 | 2.12  | 0.61 |
| -6 | 4  | -8 | 0.44  | 0.70 |
| -6 | 4  | -8 | 1.74  | 1.02 |
| 6  | 4  | 8  | 0.13  | 0.76 |
| 6  | -4 | -8 | 1.53  | 0.84 |
| -6 | 4  | -8 | 2.06  | 0.59 |
| -6 | -4 | 8  | 2.19  | 0.80 |
| -6 | 4  | -8 | 1.39  | 0.80 |
| -7 | -4 | -8 | 1.69  | 1.16 |

## CIF S3

|    |    |    |       |      |
|----|----|----|-------|------|
| -7 | -4 | -8 | 2.24  | 0.57 |
| -7 | -4 | -8 | 2.56  | 0.52 |
| -7 | -4 | -8 | 2.09  | 0.61 |
| -7 | 4  | 8  | 4.60  | 0.68 |
| 7  | -4 | 8  | 3.80  | 1.17 |
| -7 | 4  | 8  | 3.19  | 0.74 |
| -7 | -4 | -8 | 1.99  | 0.94 |
| -7 | -4 | -8 | 3.22  | 0.81 |
| -7 | -4 | -8 | 3.05  | 1.19 |
| -7 | -4 | -8 | 2.74  | 0.62 |
| -7 | 4  | 8  | 2.69  | 0.65 |
| -7 | 4  | 8  | 0.95  | 0.44 |
| -7 | -4 | -8 | 3.21  | 0.62 |
| -7 | 4  | 8  | 2.73  | 0.56 |
| -7 | 4  | -8 | 3.45  | 0.88 |
| -7 | 4  | -8 | 4.49  | 1.22 |
| -7 | 4  | -8 | 2.19  | 1.08 |
| -7 | -4 | 8  | 3.17  | 0.90 |
| -7 | 4  | -8 | 3.30  | 0.75 |
| -7 | 4  | -8 | 2.69  | 0.58 |
| -8 | -4 | -8 | 3.50  | 0.77 |
| -8 | -4 | -8 | 3.73  | 0.71 |
| -8 | 4  | 8  | 4.29  | 0.80 |
| -8 | -4 | -8 | 4.51  | 0.77 |
| -8 | -4 | -8 | 3.48  | 0.71 |
| -8 | -4 | -8 | 4.11  | 1.16 |
| -8 | 4  | 8  | 4.21  | 0.49 |
| 8  | -4 | 8  | 4.07  | 0.94 |
| -8 | -4 | -8 | 3.23  | 1.02 |
| -8 | 4  | -8 | 4.00  | 0.88 |
| -8 | 4  | -8 | 4.04  | 0.69 |
| -8 | 4  | -8 | 4.64  | 0.77 |
| -8 | 4  | -8 | 4.11  | 0.84 |
| -8 | 4  | -8 | 1.96  | 0.86 |
| 9  | -4 | 8  | 0.33  | 0.43 |
| -9 | -4 | -8 | 0.12  | 0.67 |
| -9 | -4 | -8 | 0.64  | 0.34 |
| -9 | -4 | -8 | 0.28  | 0.36 |
| -9 | 4  | 8  | -0.02 | 0.15 |
| -9 | 4  | 8  | 0.10  | 0.15 |
| -9 | 4  | -8 | -0.26 | 0.39 |

## CIF S3

|    |    |    |       |      |
|----|----|----|-------|------|
| -9 | 4  | -8 | 0.35  | 0.36 |
| -9 | 4  | -8 | 0.35  | 0.42 |
| -9 | 4  | -8 | -0.22 | 0.43 |
| 0  | -5 | 8  | 13.23 | 0.95 |
| 0  | -5 | -8 | 10.03 | 1.25 |
| 0  | -5 | -8 | 8.62  | 1.62 |
| 0  | 5  | 8  | 14.07 | 0.89 |
| 0  | 5  | 8  | 14.56 | 1.75 |
| 0  | 5  | -8 | 14.71 | 1.22 |
| 0  | -5 | 8  | 13.76 | 1.93 |
| 0  | 5  | -8 | 16.14 | 1.12 |
| 0  | 5  | -8 | 14.34 | 1.14 |
| 0  | -5 | 8  | 12.67 | 1.06 |
| 0  | 5  | -8 | 10.60 | 1.55 |
| 1  | 5  | -8 | 16.12 | 1.12 |
| 1  | -5 | 8  | 15.26 | 1.05 |
| -1 | -5 | -8 | 14.39 | 1.25 |
| -1 | 5  | 8  | 15.88 | 0.97 |
| 1  | 5  | -8 | 16.13 | 1.23 |
| -1 | -5 | -8 | 11.36 | 1.69 |
| -1 | -5 | 8  | 14.47 | 1.07 |
| -1 | 5  | -8 | 14.93 | 1.17 |
| 1  | -5 | -8 | 14.97 | 1.45 |
| 1  | 5  | 8  | 15.93 | 1.00 |
| -1 | 5  | -8 | 14.81 | 1.34 |
| -1 | 5  | -8 | 16.11 | 1.22 |
| -1 | 5  | -8 | 16.04 | 1.73 |
| 1  | -5 | -8 | 12.93 | 1.43 |
| 1  | -5 | -8 | 15.19 | 1.78 |
| -1 | -5 | 8  | 14.06 | 1.73 |
| 2  | -5 | 8  | 8.88  | 0.95 |
| 2  | 5  | -8 | 9.76  | 0.94 |
| -2 | -5 | -8 | 7.28  | 1.43 |
| 2  | 5  | -8 | 8.15  | 0.82 |
| -2 | 5  | 8  | 8.37  | 0.80 |
| 2  | -5 | 8  | 8.64  | 1.59 |
| -2 | 5  | 8  | 8.00  | 0.76 |
| -2 | -5 | -8 | 8.59  | 1.01 |
| -2 | -5 | 8  | 7.96  | 0.76 |
| -2 | 5  | -8 | 9.01  | 2.04 |
| -2 | -5 | 8  | 8.99  | 0.61 |

## CIF S3

|    |    |    |       |      |
|----|----|----|-------|------|
| -2 | 5  | -8 | 9.66  | 1.01 |
| 2  | 5  | 8  | 8.12  | 0.75 |
| -2 | 5  | -8 | 8.43  | 0.87 |
| 2  | -5 | -8 | 6.98  | 1.08 |
| 2  | -5 | -8 | 5.74  | 1.19 |
| 2  | 5  | 8  | 6.62  | 1.66 |
| -2 | 5  | -8 | 8.80  | 1.04 |
| -2 | -5 | 8  | 8.06  | 0.65 |
| 2  | -5 | -8 | 7.69  | 1.49 |
| 3  | 5  | -8 | 26.30 | 1.69 |
| -3 | -5 | -8 | 27.65 | 1.79 |
| -3 | -5 | -8 | 28.91 | 1.77 |
| -3 | 5  | 8  | 25.86 | 1.61 |
| 3  | 5  | -8 | 24.96 | 1.54 |
| 3  | -5 | 8  | 28.36 | 1.70 |
| 3  | 5  | -8 | 28.99 | 1.60 |
| -3 | -5 | 8  | 27.74 | 1.47 |
| -3 | -5 | 8  | 30.63 | 1.53 |
| -3 | -5 | 8  | 28.44 | 1.41 |
| -3 | 5  | -8 | 27.88 | 1.68 |
| 3  | -5 | -8 | 25.85 | 1.91 |
| -3 | 5  | -8 | 27.40 | 1.80 |
| 3  | -5 | -8 | 22.63 | 2.00 |
| 3  | 5  | 8  | 29.96 | 1.79 |
| -3 | -5 | 8  | 27.65 | 1.50 |
| -3 | 5  | -8 | 29.79 | 1.87 |
| -3 | -5 | 8  | 28.79 | 1.40 |
| -3 | -5 | 8  | 26.49 | 1.66 |
| -4 | 5  | 8  | 48.68 | 2.45 |
| -4 | -5 | -8 | 44.52 | 2.47 |
| -4 | -5 | -8 | 45.86 | 2.54 |
| -4 | -5 | -8 | 43.58 | 2.45 |
| -4 | -5 | -8 | 40.28 | 2.62 |
| -4 | 5  | 8  | 48.55 | 2.70 |
| -4 | 5  | 8  | 45.20 | 2.40 |
| 4  | -5 | 8  | 48.44 | 2.56 |
| 4  | -5 | -8 | 38.91 | 2.84 |
| -4 | 5  | -8 | 46.33 | 2.54 |
| -4 | -5 | 8  | 45.62 | 2.48 |
| 4  | -5 | -8 | 45.78 | 2.73 |
| -4 | 5  | -8 | 49.60 | 2.63 |

## CIF S3

|    |    |    |       |      |
|----|----|----|-------|------|
| 4  | 5  | 8  | 46.26 | 2.65 |
| -4 | 5  | -8 | 47.35 | 2.76 |
| -4 | -5 | 8  | 44.58 | 2.33 |
| -4 | -5 | 8  | 48.15 | 2.31 |
| -5 | -5 | -8 | 0.68  | 0.84 |
| -5 | -5 | -8 | -0.19 | 0.74 |
| -5 | -5 | -8 | 0.53  | 0.59 |
| -5 | 5  | 8  | -0.20 | 0.52 |
| 5  | -5 | 8  | 0.97  | 0.91 |
| -5 | 5  | 8  | 0.54  | 0.61 |
| -5 | 5  | 8  | 0.40  | 0.78 |
| -5 | -5 | -8 | 0.33  | 0.60 |
| -5 | 5  | -8 | 0.47  | 0.74 |
| 5  | -5 | -8 | 0.01  | 0.95 |
| 5  | 5  | 8  | 0.00  | 0.74 |
| 5  | -5 | -8 | 0.88  | 1.15 |
| -5 | 5  | -8 | 0.34  | 0.88 |
| -5 | -5 | 8  | 1.77  | 0.78 |
| -5 | 5  | -8 | 0.17  | 0.74 |
| -5 | -5 | 8  | 0.44  | 0.29 |
| -6 | -5 | -8 | 17.77 | 1.28 |
| -6 | -5 | -8 | 15.73 | 1.55 |
| -6 | 5  | 8  | 19.98 | 1.26 |
| -6 | -5 | -8 | 18.01 | 1.31 |
| -6 | -5 | -8 | 19.06 | 1.70 |
| -6 | -5 | -8 | 17.95 | 1.41 |
| -6 | -5 | -8 | 19.15 | 1.62 |
| -6 | -5 | 8  | 16.88 | 1.52 |
| -6 | 5  | -8 | 19.12 | 1.44 |
| -6 | 5  | -8 | 18.58 | 1.28 |
| -6 | 5  | -8 | 18.88 | 1.52 |
| -7 | -5 | -8 | 17.34 | 1.22 |
| -7 | -5 | -8 | 14.84 | 1.49 |
| -7 | -5 | -8 | 17.37 | 1.16 |
| -7 | -5 | -8 | 16.09 | 1.15 |
| -7 | -5 | -8 | 18.37 | 1.51 |
| 7  | -5 | 8  | 16.71 | 1.34 |
| -7 | -5 | -8 | 16.11 | 1.57 |
| -7 | -5 | -8 | 13.98 | 1.20 |
| -7 | 5  | 8  | 15.86 | 1.06 |
| -7 | 5  | 8  | 16.25 | 1.15 |

## CIF S3

|    |    |    |       |      |
|----|----|----|-------|------|
| -7 | -5 | -8 | 14.39 | 1.19 |
| -7 | 5  | 8  | 15.65 | 1.08 |
| -7 | -5 | -8 | 15.01 | 1.58 |
| -7 | 5  | 8  | 16.01 | 1.00 |
| -7 | -5 | -8 | 17.37 | 1.05 |
| -7 | -5 | 8  | 14.29 | 1.37 |
| -7 | 5  | -8 | 16.84 | 1.86 |
| -7 | 5  | -8 | 16.11 | 1.30 |
| -7 | 5  | -8 | 19.67 | 1.62 |
| -7 | 5  | -8 | 16.68 | 1.03 |
| -7 | 5  | -8 | 16.19 | 1.23 |
| -8 | -5 | -8 | 2.95  | 0.66 |
| -8 | 5  | 8  | 2.27  | 0.50 |
| -8 | -5 | -8 | 1.36  | 0.49 |
| -8 | -5 | -8 | 1.49  | 0.49 |
| -8 | -5 | -8 | 1.12  | 0.51 |
| -8 | 5  | 8  | 1.78  | 0.26 |
| -8 | -5 | -8 | 1.11  | 0.97 |
| 8  | -5 | 8  | 1.81  | 0.54 |
| -8 | 5  | -8 | 1.55  | 0.54 |
| -8 | 5  | -8 | 1.09  | 0.45 |
| -8 | 5  | -8 | 2.49  | 0.59 |
| 9  | -5 | 8  | 0.60  | 0.40 |
| -9 | 5  | 8  | 1.09  | 0.25 |
| -9 | -5 | -8 | 1.02  | 0.35 |
| -9 | -5 | -8 | 0.92  | 0.32 |
| -9 | 5  | 8  | 1.08  | 0.24 |
| -9 | 5  | 8  | 0.76  | 0.19 |
| -9 | -5 | -8 | 0.65  | 0.32 |
| -9 | 5  | -8 | 0.84  | 0.33 |
| -9 | 5  | -8 | 0.81  | 0.38 |
| -9 | 5  | -8 | 2.16  | 0.39 |
| -9 | 5  | -8 | 0.74  | 0.43 |
| 0  | -6 | 8  | 44.49 | 2.57 |
| 0  | 6  | -8 | 47.89 | 2.64 |
| 0  | 6  | -8 | 51.91 | 3.31 |
| 0  | 6  | -8 | 45.94 | 2.74 |
| 0  | -6 | 8  | 49.09 | 2.50 |
| 0  | 6  | 8  | 47.66 | 2.50 |
| 0  | -6 | 8  | 46.30 | 2.51 |
| 0  | 6  | -8 | 47.88 | 2.65 |



## CIF S3

|    |    |    |       |      |
|----|----|----|-------|------|
| 0  | -6 | 8  | 42.20 | 3.29 |
| 1  | -6 | 8  | 21.40 | 1.42 |
| 1  | -6 | 8  | 23.09 | 1.57 |
| 1  | 6  | -8 | 24.76 | 1.61 |
| -1 | 6  | 8  | 21.87 | 1.33 |
| -1 | -6 | -8 | 23.49 | 1.63 |
| 1  | 6  | -8 | 22.08 | 1.47 |
| 1  | -6 | -8 | 21.55 | 1.77 |
| -1 | 6  | -8 | 21.20 | 1.52 |
| -1 | -6 | 8  | 20.25 | 1.37 |
| -1 | -6 | 8  | 20.63 | 1.41 |
| -1 | 6  | -8 | 22.78 | 1.71 |
| -1 | 6  | -8 | 22.64 | 1.57 |
| 1  | 6  | 8  | 21.27 | 1.33 |
| -2 | 6  | 8  | 0.80  | 0.52 |
| -2 | -6 | -8 | 1.25  | 0.83 |
| -2 | 6  | 8  | 0.78  | 0.59 |
| 2  | 6  | -8 | 1.17  | 0.65 |
| 2  | -6 | 8  | 1.82  | 0.66 |
| 2  | 6  | -8 | 1.13  | 0.57 |
| -2 | 6  | -8 | 1.07  | 0.80 |
| 2  | -6 | -8 | 2.69  | 1.19 |
| -2 | -6 | 8  | 2.17  | 0.60 |
| -2 | -6 | 8  | 1.48  | 0.51 |
| -2 | 6  | -8 | 1.03  | 0.81 |
| -2 | -6 | 8  | 1.14  | 0.52 |
| -2 | -6 | 8  | 1.26  | 0.68 |
| 2  | -6 | -8 | 1.65  | 1.02 |
| 2  | 6  | 8  | 0.76  | 0.50 |
| -2 | -6 | 8  | 1.09  | 0.39 |
| -2 | -6 | 8  | 1.44  | 0.35 |
| -3 | -6 | -8 | 8.36  | 1.25 |
| 3  | -6 | 8  | 10.02 | 1.07 |
| 3  | 6  | -8 | 11.83 | 1.07 |
| -3 | 6  | 8  | 11.49 | 0.97 |
| 3  | 6  | -8 | 11.21 | 0.94 |
| -3 | 6  | 8  | 10.46 | 1.03 |
| -3 | -6 | -8 | 10.21 | 1.20 |
| 3  | -6 | -8 | 8.92  | 1.38 |
| -3 | -6 | 8  | 11.71 | 0.69 |
| 3  | -6 | -8 | 7.13  | 1.35 |

## CIF S3

|    |    |    |       |      |
|----|----|----|-------|------|
| -3 | -6 | 8  | 11.75 | 0.87 |
| -3 | 6  | -8 | 10.75 | 1.26 |
| -3 | -6 | 8  | 10.36 | 1.19 |
| -3 | -6 | 8  | 10.56 | 0.79 |
| -3 | -6 | 8  | 10.47 | 0.87 |
| -3 | -6 | 8  | 12.02 | 0.66 |
| -3 | 6  | -8 | 11.93 | 1.07 |
| -3 | 6  | -8 | 11.13 | 1.15 |
| -3 | -6 | 8  | 10.54 | 0.85 |
| -4 | -6 | -8 | 38.29 | 2.06 |
| -4 | 6  | 8  | 36.89 | 2.03 |
| 4  | 6  | -8 | 39.10 | 2.17 |
| 4  | -6 | 8  | 39.89 | 2.20 |
| -4 | -6 | -8 | 38.78 | 2.19 |
| -4 | 6  | 8  | 38.74 | 2.09 |
| -4 | -6 | -8 | 31.85 | 2.23 |
| -4 | -6 | -8 | 37.37 | 2.15 |
| 4  | -6 | -8 | 33.06 | 2.38 |
| -4 | -6 | 8  | 38.72 | 2.12 |
| -4 | 6  | -8 | 39.21 | 2.18 |
| -4 | 6  | -8 | 36.37 | 2.38 |
| -4 | 6  | -8 | 38.20 | 2.32 |
| 4  | 6  | 8  | 34.97 | 2.28 |
| -4 | -6 | 8  | 36.13 | 1.94 |
| -4 | -6 | 8  | 36.88 | 2.07 |
| 4  | -6 | -8 | 28.27 | 2.51 |
| -4 | -6 | 8  | 37.62 | 1.93 |
| -5 | 6  | 8  | 9.39  | 0.97 |
| -5 | -6 | -8 | 10.06 | 1.05 |
| -5 | 6  | 8  | 10.62 | 1.02 |
| -5 | -6 | -8 | 10.89 | 0.96 |
| 5  | -6 | 8  | 11.57 | 1.28 |
| -5 | -6 | -8 | 12.56 | 1.26 |
| -5 | -6 | -8 | 11.19 | 1.50 |
| -5 | 6  | 8  | 10.69 | 1.31 |
| -5 | 6  | -8 | 8.36  | 1.35 |
| 5  | 6  | 8  | 8.37  | 1.11 |
| -5 | 6  | -8 | 10.85 | 1.09 |
| -5 | -6 | 8  | 12.11 | 1.27 |
| -5 | 6  | -8 | 9.87  | 1.27 |
| -5 | -6 | 8  | 10.92 | 1.16 |

## CIF S3

|    |    |    |       |      |
|----|----|----|-------|------|
| 5  | -6 | -8 | 7.51  | 1.30 |
| -6 | 6  | 8  | 12.39 | 1.14 |
| -6 | -6 | -8 | 13.56 | 1.52 |
| -6 | -6 | -8 | 15.06 | 1.12 |
| -6 | -6 | -8 | 12.81 | 1.17 |
| -6 | -6 | -8 | 13.97 | 1.63 |
| 6  | -6 | 8  | 12.80 | 1.24 |
| -6 | -6 | -8 | 10.29 | 1.06 |
| -6 | 6  | 8  | 12.60 | 1.09 |
| -6 | -6 | -8 | 14.24 | 1.44 |
| -6 | -6 | -8 | 11.99 | 1.15 |
| -6 | 6  | 8  | 13.73 | 1.14 |
| -6 | -6 | -8 | 13.58 | 1.39 |
| -6 | 6  | 8  | 13.74 | 1.12 |
| -6 | 6  | 8  | 12.91 | 1.12 |
| -6 | 6  | -8 | 15.04 | 1.75 |
| -6 | -6 | 8  | 12.28 | 1.34 |
| -6 | 6  | -8 | 16.33 | 2.24 |
| -6 | 6  | -8 | 12.59 | 1.33 |
| -6 | 6  | -8 | 13.89 | 1.10 |
| -6 | -6 | 8  | 13.08 | 0.70 |
| -6 | 6  | -8 | 13.64 | 1.26 |
| -7 | -6 | -8 | 1.76  | 1.05 |
| -7 | -6 | -8 | 1.74  | 0.59 |
| -7 | 6  | 8  | 1.94  | 0.45 |
| -7 | -6 | -8 | 0.21  | 0.58 |
| -7 | -6 | -8 | 1.35  | 0.48 |
| -7 | 6  | 8  | 1.15  | 0.53 |
| -7 | -6 | -8 | 1.81  | 0.38 |
| -7 | 6  | 8  | 1.91  | 0.48 |
| -7 | -6 | -8 | -0.99 | 0.99 |
| -7 | -6 | -8 | 0.39  | 0.59 |
| -7 | 6  | 8  | 0.88  | 0.56 |
| -7 | 6  | 8  | 2.50  | 0.59 |
| 7  | -6 | 8  | 1.02  | 0.58 |
| -7 | -6 | -8 | -0.17 | 0.59 |
| -7 | -6 | -8 | 1.31  | 0.88 |
| -7 | 6  | -8 | 1.18  | 0.64 |
| -7 | -6 | 8  | 0.45  | 0.82 |
| -7 | 6  | -8 | 1.25  | 1.07 |
| -7 | 6  | -8 | 1.17  | 0.53 |

## CIF S3

|    |    |    |       |      |
|----|----|----|-------|------|
| -7 | 6  | -8 | 1.95  | 0.63 |
| -7 | 6  | -8 | 1.13  | 0.41 |
| 8  | -6 | 8  | 2.89  | 0.72 |
| -8 | -6 | -8 | 0.90  | 0.51 |
| -8 | -6 | -8 | 2.95  | 0.61 |
| -8 | -6 | -8 | 3.50  | 0.66 |
| -8 | -6 | -8 | 1.63  | 0.50 |
| -8 | 6  | 8  | 2.40  | 0.38 |
| -8 | 6  | 8  | 2.70  | 0.51 |
| -8 | -6 | -8 | 3.67  | 1.10 |
| -8 | 6  | 8  | 2.13  | 0.52 |
| -8 | 6  | 8  | 2.44  | 0.65 |
| -8 | 6  | -8 | 2.13  | 0.53 |
| -8 | 6  | -8 | 2.68  | 0.75 |
| 8  | 6  | 8  | 2.89  | 0.64 |
| -8 | 6  | -8 | 3.42  | 0.61 |
| 9  | -6 | 8  | 1.54  | 0.51 |
| -9 | 6  | 8  | 1.29  | 0.23 |
| -9 | -6 | -8 | 1.83  | 0.50 |
| -9 | 6  | 8  | 2.02  | 0.27 |
| -9 | -6 | -8 | 2.04  | 0.38 |
| -9 | 6  | 8  | 1.68  | 0.34 |
| -9 | 6  | -8 | 2.76  | 0.53 |
| -9 | 6  | -8 | 1.93  | 0.39 |
| -9 | 6  | -8 | 1.88  | 0.37 |
| -9 | 6  | -8 | 2.15  | 0.45 |
| 9  | 6  | 8  | 2.15  | 0.46 |
| 0  | -7 | 8  | 22.42 | 1.51 |
| 0  | 7  | 8  | 25.92 | 1.53 |
| 0  | -7 | 8  | 24.33 | 1.56 |
| 0  | 7  | -8 | 25.43 | 1.69 |
| 0  | -7 | 8  | 25.14 | 1.50 |
| 0  | -7 | 8  | 22.86 | 1.57 |
| 0  | 7  | -8 | 25.36 | 1.85 |
| 0  | -7 | -8 | 25.24 | 1.81 |
| 0  | 7  | -8 | 23.55 | 1.67 |
| -1 | -7 | -8 | 25.93 | 1.84 |
| 1  | -7 | 8  | 25.44 | 1.72 |
| 1  | 7  | -8 | 26.01 | 1.71 |
| 1  | 7  | -8 | 25.29 | 1.83 |
| 1  | -7 | 8  | 27.96 | 1.60 |

## CIF S3

|    |    |    |       |      |
|----|----|----|-------|------|
| -1 | 7  | 8  | 26.11 | 1.61 |
| 1  | -7 | 8  | 26.91 | 1.60 |
| -1 | -7 | 8  | 26.29 | 1.53 |
| -1 | -7 | 8  | 26.25 | 1.66 |
| -1 | 7  | -8 | 26.23 | 1.87 |
| -1 | 7  | -8 | 23.25 | 1.85 |
| -1 | 7  | -8 | 26.14 | 1.77 |
| -1 | -7 | 8  | 26.59 | 1.66 |
| 1  | -7 | -8 | 23.86 | 2.01 |
| -1 | -7 | 8  | 26.02 | 1.60 |
| 1  | 7  | 8  | 26.55 | 1.55 |
| 2  | 7  | -8 | 0.49  | 0.69 |
| 2  | -7 | 8  | 1.20  | 0.87 |
| -2 | -7 | -8 | 0.33  | 0.90 |
| -2 | 7  | 8  | 1.16  | 0.55 |
| -2 | 7  | 8  | 1.06  | 0.61 |
| 2  | 7  | -8 | 0.77  | 0.66 |
| 2  | -7 | 8  | 1.68  | 0.70 |
| 2  | -7 | 8  | 0.87  | 0.69 |
| -2 | -7 | 8  | 1.23  | 0.52 |
| 2  | -7 | -8 | -1.06 | 1.22 |
| -2 | -7 | 8  | 1.18  | 0.75 |
| -2 | -7 | 8  | -0.29 | 0.62 |
| -2 | -7 | 8  | 1.72  | 0.62 |
| -2 | -7 | 8  | 0.79  | 0.37 |
| -2 | 7  | -8 | 0.65  | 0.76 |
| -2 | -7 | 8  | 1.38  | 0.59 |
| -2 | -7 | 8  | 1.27  | 0.66 |
| 2  | 7  | 8  | 1.43  | 0.59 |
| -3 | -7 | -8 | -0.02 | 0.93 |
| -3 | 7  | 8  | 1.07  | 0.55 |
| -3 | -7 | -8 | 0.30  | 0.94 |
| 3  | -7 | 8  | 3.68  | 1.01 |
| -3 | -7 | -8 | -0.79 | 0.80 |
| -3 | 7  | 8  | 1.30  | 0.73 |
| -3 | 7  | 8  | 0.91  | 0.59 |
| 3  | -7 | 8  | 1.39  | 0.86 |
| 3  | 7  | -8 | 0.57  | 0.70 |
| 3  | 7  | -8 | 0.67  | 0.56 |
| -3 | -7 | -8 | 0.97  | 0.68 |
| -3 | -7 | 8  | 0.94  | 0.45 |

## CIF S3

|    |    |    |       |      |
|----|----|----|-------|------|
| 3  | -7 | -8 | -0.36 | 1.17 |
| -3 | 7  | -8 | 1.03  | 0.71 |
| -3 | 7  | -8 | -0.32 | 0.81 |
| -3 | -7 | 8  | 1.51  | 0.53 |
| -3 | 7  | -8 | 1.30  | 0.91 |
| -3 | -7 | 8  | 1.01  | 0.52 |
| -3 | -7 | 8  | 0.52  | 0.30 |
| -3 | -7 | 8  | 1.14  | 0.76 |
| 3  | -7 | -8 | 0.88  | 1.30 |
| -4 | -7 | -8 | 0.31  | 0.66 |
| -4 | 7  | 8  | 1.23  | 0.62 |
| -4 | -7 | -8 | 0.21  | 0.87 |
| 4  | 7  | -8 | 1.22  | 0.81 |
| 4  | -7 | 8  | 0.93  | 0.81 |
| -4 | -7 | -8 | 0.99  | 1.01 |
| -4 | -7 | -8 | 0.81  | 0.97 |
| -4 | 7  | 8  | 1.90  | 0.74 |
| -4 | -7 | 8  | 0.86  | 0.53 |
| 4  | -7 | -8 | 1.47  | 1.43 |
| -4 | 7  | -8 | 0.53  | 0.76 |
| -4 | -7 | 8  | 0.85  | 0.71 |
| -4 | 7  | -8 | 1.31  | 0.90 |
| -4 | -7 | 8  | 2.49  | 0.91 |
| 4  | -7 | -8 | 2.84  | 1.18 |
| 4  | 7  | 8  | 0.08  | 0.76 |
| -4 | 7  | -8 | 0.75  | 0.86 |
| 5  | -7 | 8  | 5.54  | 1.09 |
| -5 | -7 | -8 | 6.73  | 1.15 |
| -5 | -7 | -8 | 5.58  | 1.17 |
| -5 | -7 | -8 | 4.96  | 0.93 |
| -5 | 7  | 8  | 5.60  | 0.97 |
| -5 | -7 | -8 | 5.45  | 1.47 |
| -5 | -7 | -8 | 5.59  | 1.03 |
| -5 | -7 | -8 | 5.44  | 1.14 |
| -5 | -7 | -8 | 6.30  | 1.13 |
| -5 | 7  | 8  | 5.98  | 0.92 |
| -5 | -7 | 8  | 5.62  | 1.18 |
| -5 | 7  | -8 | 5.66  | 1.16 |
| -5 | 7  | -8 | 5.64  | 1.08 |
| -5 | -7 | 8  | 5.59  | 1.08 |
| -6 | 7  | 8  | 3.92  | 0.88 |

## CIF S3

|    |    |    |      |      |
|----|----|----|------|------|
| -6 | 7  | 8  | 4.46 | 0.86 |
| -6 | -7 | -8 | 4.18 | 0.83 |
| 6  | -7 | 8  | 4.75 | 0.99 |
| -6 | 7  | 8  | 4.58 | 1.00 |
| -6 | -7 | -8 | 3.83 | 0.85 |
| -6 | -7 | -8 | 6.16 | 1.25 |
| -6 | -7 | -8 | 4.82 | 0.94 |
| -6 | 7  | 8  | 3.95 | 0.99 |
| -6 | -7 | -8 | 5.23 | 1.44 |
| -6 | -7 | -8 | 4.95 | 0.96 |
| -6 | -7 | -8 | 5.07 | 1.21 |
| -6 | 7  | 8  | 4.53 | 0.85 |
| -6 | -7 | -8 | 4.27 | 1.09 |
| -6 | 7  | 8  | 3.61 | 0.73 |
| -6 | -7 | 8  | 4.33 | 0.37 |
| -6 | 7  | -8 | 3.84 | 0.93 |
| -6 | -7 | 8  | 3.82 | 0.91 |
| -6 | 7  | -8 | 5.32 | 1.54 |
| -6 | -7 | 8  | 4.50 | 0.39 |
| -6 | -7 | 8  | 5.06 | 0.42 |
| 6  | 7  | 8  | 4.19 | 0.76 |
| -7 | -7 | -8 | 1.09 | 0.54 |
| -7 | 7  | 8  | 1.39 | 0.51 |
| -7 | -7 | -8 | 0.68 | 0.92 |
| -7 | 7  | 8  | 2.36 | 0.61 |
| -7 | -7 | -8 | 1.82 | 0.62 |
| 7  | -7 | 8  | 2.38 | 0.81 |
| -7 | -7 | -8 | 2.39 | 0.88 |
| -7 | -7 | -8 | 1.54 | 0.57 |
| -7 | -7 | -8 | 1.48 | 0.52 |
| -7 | -7 | -8 | 2.96 | 1.05 |
| -7 | 7  | 8  | 1.74 | 0.48 |
| -7 | 7  | 8  | 1.78 | 0.54 |
| -7 | 7  | -8 | 1.81 | 0.96 |
| -7 | 7  | -8 | 1.71 | 0.47 |
| -7 | 7  | -8 | 1.46 | 0.37 |
| 7  | 7  | 8  | 0.83 | 0.46 |
| -7 | 7  | -8 | 1.64 | 0.60 |
| -7 | -7 | 8  | 2.10 | 0.81 |
| -7 | 7  | -8 | 2.75 | 0.65 |
| -8 | -7 | -8 | 0.30 | 0.38 |

## CIF S3

|    |    |    |       |      |
|----|----|----|-------|------|
| -8 | 7  | 8  | 0.25  | 0.26 |
| 8  | -7 | 8  | 0.01  | 0.36 |
| -8 | -7 | -8 | 0.65  | 0.39 |
| -8 | 7  | 8  | 0.43  | 0.33 |
| -8 | 7  | 8  | 0.83  | 0.37 |
| -8 | 7  | 8  | 0.52  | 0.32 |
| -8 | 7  | -8 | 1.23  | 0.38 |
| -8 | 7  | -8 | 0.76  | 0.50 |
| -8 | 7  | -8 | 0.32  | 0.54 |
| 8  | 7  | 8  | 0.04  | 0.36 |
| -9 | 7  | 8  | 3.08  | 0.32 |
| -9 | -7 | -8 | 3.43  | 0.44 |
| -9 | -7 | -8 | 4.00  | 0.40 |
| -9 | 7  | 8  | 3.18  | 0.28 |
| -9 | 7  | -8 | 3.71  | 0.63 |
| -9 | 7  | -8 | 3.27  | 0.45 |
| 0  | 8  | 8  | 10.39 | 1.00 |
| 0  | 8  | -8 | 6.59  | 1.07 |
| 0  | -8 | 8  | 8.24  | 1.18 |
| 0  | 8  | -8 | 7.62  | 1.26 |
| 0  | -8 | 8  | 6.63  | 1.10 |
| 0  | -8 | 8  | 7.53  | 0.93 |
| 0  | -8 | 8  | 8.39  | 0.94 |
| 0  | -8 | 8  | 8.61  | 0.99 |
| 0  | 8  | -8 | 8.05  | 1.15 |
| 1  | -8 | 8  | 5.37  | 0.89 |
| 1  | 8  | -8 | 5.28  | 0.98 |
| 1  | -8 | 8  | 6.50  | 0.88 |
| 1  | -8 | 8  | 6.49  | 1.05 |
| -1 | 8  | 8  | 3.97  | 0.95 |
| 1  | -8 | 8  | 4.74  | 1.05 |
| -1 | 8  | 8  | 6.17  | 0.83 |
| 1  | 8  | -8 | 5.57  | 1.14 |
| 1  | 8  | 8  | 5.14  | 0.82 |
| -1 | -8 | 8  | 3.90  | 0.98 |
| -1 | 8  | -8 | 3.48  | 1.01 |
| -1 | -8 | 8  | 4.36  | 0.84 |
| -1 | -8 | 8  | 5.06  | 0.90 |
| -1 | -8 | 8  | 5.17  | 0.96 |
| -1 | -8 | 8  | 5.29  | 1.04 |
| -1 | 8  | -8 | 6.37  | 1.22 |



## CIF S3

|    |    |    |       |      |
|----|----|----|-------|------|
| 2  | -8 | 8  | 33.71 | 2.09 |
| 2  | 8  | -8 | 31.83 | 2.07 |
| 2  | 8  | -8 | 34.61 | 2.24 |
| 2  | -8 | 8  | 32.82 | 1.99 |
| -2 | 8  | 8  | 31.61 | 1.95 |
| 2  | -8 | 8  | 35.15 | 2.06 |
| -2 | 8  | 8  | 31.72 | 1.93 |
| -2 | -8 | 8  | 33.66 | 2.06 |
| -2 | 8  | -8 | 32.79 | 2.29 |
| -2 | -8 | 8  | 34.66 | 1.98 |
| 2  | 8  | 8  | 29.67 | 1.90 |
| -2 | -8 | 8  | 33.43 | 1.88 |
| -2 | -8 | 8  | 31.20 | 1.78 |
| -2 | -8 | 8  | 34.88 | 1.88 |
| -2 | -8 | 8  | 34.28 | 2.03 |
| -2 | -8 | 8  | 32.80 | 1.84 |
| -3 | 8  | 8  | 5.74  | 0.97 |
| -3 | -8 | -8 | 4.82  | 1.13 |
| -3 | 8  | 8  | 4.76  | 0.86 |
| 3  | -8 | 8  | 6.63  | 1.13 |
| -3 | -8 | -8 | 5.59  | 0.93 |
| 3  | 8  | -8 | 5.67  | 0.92 |
| 3  | -8 | 8  | 6.00  | 1.16 |
| -3 | 8  | -8 | 4.39  | 1.07 |
| 3  | -8 | -8 | 5.71  | 1.42 |
| -3 | -8 | 8  | 6.88  | 1.02 |
| -3 | -8 | 8  | 3.80  | 0.89 |
| -3 | 8  | -8 | 1.83  | 0.94 |
| -3 | -8 | 8  | 4.09  | 0.85 |
| -3 | -8 | 8  | 5.63  | 0.83 |
| -3 | 8  | -8 | 6.03  | 1.04 |
| -3 | -8 | 8  | 5.52  | 0.53 |
| -4 | 8  | 8  | 1.65  | 0.77 |
| -4 | -8 | -8 | 3.12  | 1.10 |
| 4  | -8 | 8  | 1.70  | 0.93 |
| 4  | -8 | 8  | 0.53  | 0.82 |
| -4 | -8 | -8 | 0.25  | 1.09 |
| -4 | -8 | -8 | -0.42 | 0.96 |
| -4 | -8 | -8 | 0.98  | 0.75 |
| -4 | 8  | 8  | 1.20  | 0.66 |
| -4 | -8 | 8  | 1.90  | 0.86 |

## CIF S3

|    |    |    |       |      |
|----|----|----|-------|------|
| -4 | 8  | -8 | 0.63  | 0.86 |
| -4 | 8  | -8 | 0.62  | 0.85 |
| -4 | -8 | 8  | 0.62  | 0.54 |
| -4 | -8 | 8  | 0.40  | 0.69 |
| -5 | -8 | -8 | 0.85  | 0.72 |
| -5 | 8  | 8  | -0.06 | 0.64 |
| -5 | 8  | 8  | 1.56  | 0.86 |
| -5 | -8 | -8 | 1.29  | 0.71 |
| -5 | -8 | -8 | -0.70 | 1.01 |
| -5 | -8 | -8 | 0.56  | 1.05 |
| -5 | -8 | -8 | 0.77  | 0.71 |
| -5 | 8  | 8  | 0.13  | 0.65 |
| -5 | 8  | 8  | 0.97  | 0.78 |
| 5  | -8 | 8  | 0.70  | 0.45 |
| -5 | 8  | 8  | 0.68  | 0.61 |
| 5  | -8 | 8  | 0.28  | 0.81 |
| -5 | 8  | 8  | -0.39 | 0.62 |
| -5 | 8  | 8  | 0.90  | 0.67 |
| 5  | 8  | 8  | 0.30  | 0.48 |
| -5 | -8 | 8  | 0.59  | 0.34 |
| -5 | -8 | 8  | 0.39  | 0.80 |
| -5 | -8 | 8  | 1.86  | 0.92 |
| -5 | 8  | -8 | 0.05  | 0.68 |
| -5 | -8 | 8  | 0.69  | 0.52 |
| -5 | 8  | -8 | 1.32  | 0.87 |
| -6 | 8  | 8  | 4.12  | 0.86 |
| -6 | -8 | -8 | 4.75  | 1.03 |
| -6 | -8 | -8 | 3.23  | 1.10 |
| -6 | -8 | -8 | 3.96  | 0.90 |
| -6 | 8  | 8  | 3.28  | 0.66 |
| -6 | -8 | -8 | 2.32  | 0.87 |
| -6 | -8 | -8 | 3.48  | 0.87 |
| -6 | -8 | -8 | 2.96  | 0.89 |
| 6  | -8 | 8  | 3.69  | 0.78 |
| -6 | 8  | 8  | 3.35  | 0.82 |
| -6 | 8  | 8  | 3.75  | 0.93 |
| -6 | 8  | 8  | 3.88  | 0.90 |
| -6 | 8  | 8  | 4.05  | 0.71 |
| -6 | -8 | -8 | 3.40  | 0.73 |
| -6 | 8  | 8  | 3.71  | 0.95 |
| -6 | -8 | 8  | 3.42  | 0.36 |

## CIF S3

|    |    |    |       |      |
|----|----|----|-------|------|
| -6 | -8 | 8  | 3.88  | 0.41 |
| -6 | -8 | 8  | 3.28  | 0.86 |
| -6 | -8 | 8  | 3.64  | 0.86 |
| -6 | 8  | -8 | 2.88  | 1.09 |
| -6 | -8 | 8  | 3.93  | 0.40 |
| -6 | 8  | -8 | 2.59  | 0.81 |
| 6  | 8  | 8  | 3.02  | 0.71 |
| -7 | 8  | 8  | 0.81  | 0.49 |
| -7 | 8  | 8  | 1.22  | 0.43 |
| -7 | -8 | -8 | 0.86  | 0.85 |
| -7 | -8 | -8 | 1.18  | 0.54 |
| -7 | 8  | 8  | 1.27  | 0.46 |
| 7  | -8 | 8  | 1.20  | 0.40 |
| -7 | 8  | 8  | 1.27  | 0.57 |
| -7 | -8 | -8 | 1.05  | 0.55 |
| -7 | 8  | 8  | 1.32  | 0.47 |
| -7 | -8 | -8 | 0.84  | 0.51 |
| -7 | 8  | -8 | 0.54  | 0.85 |
| -7 | 8  | -8 | 1.08  | 0.57 |
| 7  | 8  | 8  | 1.02  | 0.42 |
| -7 | 8  | -8 | 0.72  | 0.56 |
| -7 | -8 | 8  | 0.43  | 0.75 |
| -7 | 8  | -8 | 1.52  | 0.44 |
| -8 | 8  | 8  | 2.26  | 0.49 |
| -8 | -8 | -8 | 2.84  | 0.60 |
| -8 | 8  | 8  | 1.85  | 0.45 |
| -8 | 8  | 8  | 1.80  | 0.34 |
| -8 | 8  | 8  | 2.48  | 0.35 |
| -8 | -8 | -8 | 2.42  | 0.63 |
| -8 | -8 | -8 | 2.57  | 0.55 |
| -8 | 8  | -8 | 1.41  | 0.34 |
| -8 | 8  | -8 | 1.29  | 0.44 |
| 8  | 8  | 8  | 1.54  | 0.54 |
| 0  | 9  | 8  | 50.72 | 2.85 |
| 0  | -9 | 8  | 52.11 | 2.77 |
| 0  | -9 | 8  | 57.51 | 3.14 |
| 0  | -9 | 8  | 48.91 | 2.77 |
| 0  | 9  | -8 | 49.54 | 3.06 |
| 0  | 9  | -8 | 53.20 | 3.59 |
| 0  | -9 | 8  | 48.75 | 2.87 |
| 0  | -9 | 8  | 51.23 | 2.77 |

## CIF S3

|    |    |    |       |      |
|----|----|----|-------|------|
| 1  | -9 | 8  | 11.33 | 1.20 |
| 1  | 9  | -8 | 13.05 | 1.35 |
| -1 | 9  | 8  | 12.31 | 1.11 |
| 1  | -9 | 8  | 12.34 | 1.22 |
| 1  | -9 | 8  | 10.66 | 1.28 |
| 1  | -9 | 8  | 11.40 | 1.24 |
| -1 | 9  | -8 | 11.89 | 1.43 |
| -1 | -9 | 8  | 13.99 | 1.20 |
| 1  | 9  | 8  | 11.87 | 1.14 |
| -1 | 9  | -8 | 13.06 | 1.39 |
| -1 | -9 | 8  | 11.70 | 1.34 |
| -1 | -9 | 8  | 12.79 | 1.13 |
| -1 | -9 | 8  | 11.74 | 0.99 |
| -1 | -9 | 8  | 12.96 | 1.41 |
| -1 | -9 | 8  | 12.70 | 1.08 |
| 2  | -9 | 8  | 2.74  | 0.88 |
| -2 | 9  | 8  | 1.50  | 0.68 |
| 2  | 9  | -8 | 2.11  | 0.81 |
| 2  | -9 | 8  | 2.03  | 0.96 |
| -2 | 9  | 8  | 2.05  | 0.72 |
| 2  | -9 | 8  | 2.81  | 0.79 |
| 2  | -9 | 8  | 2.56  | 0.84 |
| -2 | -9 | -8 | 2.50  | 0.88 |
| 2  | 9  | 8  | 3.13  | 0.84 |
| -2 | -9 | 8  | 4.31  | 1.00 |
| -2 | -9 | 8  | 2.63  | 0.77 |
| -2 | 9  | -8 | 0.23  | 0.85 |
| -2 | -9 | 8  | 2.59  | 0.81 |
| -2 | -9 | 8  | 2.69  | 0.64 |
| -3 | 9  | 8  | 46.61 | 2.59 |
| -3 | 9  | 8  | 41.44 | 2.33 |
| -3 | -9 | -8 | 39.70 | 3.01 |
| 3  | -9 | 8  | 43.43 | 2.49 |
| -3 | -9 | -8 | 40.76 | 2.31 |
| -3 | -9 | -8 | 42.22 | 2.36 |
| 3  | -9 | 8  | 42.38 | 2.43 |
| -3 | -9 | 8  | 43.32 | 2.28 |
| -3 | 9  | -8 | 37.50 | 2.49 |
| -3 | -9 | 8  | 39.25 | 2.12 |
| -3 | -9 | 8  | 41.04 | 2.48 |
| -3 | 9  | -8 | 40.01 | 2.45 |

## CIF S3

|    |    |    |       |      |
|----|----|----|-------|------|
| -4 | -9 | -8 | 14.44 | 1.60 |
| -4 | -9 | -8 | 15.81 | 1.61 |
| -4 | -9 | -8 | 14.34 | 1.36 |
| -4 | 9  | 8  | 16.30 | 1.37 |
| -4 | 9  | 8  | 13.54 | 1.36 |
| -4 | -9 | -8 | 14.71 | 1.52 |
| 4  | -9 | 8  | 15.30 | 1.37 |
| -4 | 9  | 8  | 16.23 | 1.29 |
| -4 | 9  | 8  | 16.05 | 1.49 |
| -4 | -9 | -8 | 16.63 | 1.28 |
| -4 | 9  | 8  | 14.90 | 1.22 |
| -4 | -9 | -8 | 17.55 | 1.12 |
| -4 | -9 | 8  | 15.42 | 0.99 |
| -4 | 9  | -8 | 14.29 | 1.44 |
| -4 | -9 | 8  | 13.75 | 1.09 |
| 4  | 9  | 8  | 14.10 | 1.13 |
| -4 | -9 | 8  | 15.29 | 0.98 |
| -4 | -9 | 8  | 14.67 | 1.02 |
| -4 | -9 | 8  | 16.17 | 1.33 |
| -4 | -9 | 8  | 15.10 | 1.09 |
| -4 | -9 | 8  | 15.97 | 1.39 |
| -4 | 9  | -8 | 15.17 | 1.47 |
| -5 | -9 | -8 | 2.07  | 0.72 |
| -5 | 9  | 8  | 4.51  | 0.98 |
| -5 | 9  | 8  | 3.13  | 0.90 |
| -5 | 9  | 8  | 2.35  | 0.65 |
| -5 | 9  | 8  | 3.44  | 0.88 |
| -5 | 9  | 8  | 3.46  | 0.71 |
| -5 | -9 | -8 | 2.29  | 1.05 |
| -5 | -9 | -8 | 3.75  | 1.55 |
| -5 | 9  | 8  | 3.99  | 0.97 |
| -5 | 9  | 8  | 1.45  | 0.64 |
| -5 | -9 | -8 | 2.44  | 0.75 |
| -5 | -9 | -8 | 3.06  | 0.70 |
| -5 | -9 | -8 | 1.96  | 0.97 |
| -5 | -9 | 8  | 2.39  | 0.49 |
| -5 | -9 | 8  | 2.88  | 0.55 |
| -5 | -9 | 8  | 2.55  | 0.80 |
| -5 | -9 | 8  | 2.48  | 0.93 |
| 5  | 9  | 8  | 3.12  | 0.77 |
| 5  | 9  | 8  | 3.14  | 0.95 |

## CIF S3

|    |    |    |       |      |
|----|----|----|-------|------|
| -6 | -9 | -8 | -0.20 | 0.60 |
| -6 | 9  | 8  | 0.01  | 0.46 |
| -6 | -9 | -8 | 0.19  | 0.59 |
| -6 | -9 | -8 | 0.77  | 0.35 |
| -6 | -9 | -8 | 2.07  | 0.93 |
| -6 | 9  | 8  | 1.43  | 0.52 |
| -6 | -9 | -8 | 0.19  | 0.53 |
| -6 | 9  | 8  | 0.29  | 0.54 |
| -6 | 9  | 8  | 0.68  | 0.55 |
| -6 | -9 | -8 | 0.34  | 0.60 |
| -6 | 9  | 8  | 0.93  | 0.60 |
| -6 | 9  | 8  | 0.35  | 0.90 |
| -6 | 9  | 8  | 1.09  | 0.52 |
| -6 | -9 | -8 | 0.16  | 0.56 |
| -6 | -9 | 8  | 0.46  | 0.21 |
| -6 | -9 | 8  | 0.32  | 0.25 |
| -6 | -9 | 8  | -0.28 | 0.76 |
| 6  | 9  | 8  | 0.88  | 0.58 |
| -6 | 9  | -8 | 0.65  | 1.01 |
| -6 | 9  | -8 | -0.10 | 0.49 |
| -6 | -9 | 8  | 0.80  | 0.24 |
| 6  | 9  | 8  | 1.05  | 0.47 |
| -6 | -9 | 8  | 0.41  | 0.84 |
| -7 | -9 | -8 | 2.65  | 1.04 |
| -7 | -9 | -8 | 0.93  | 0.49 |
| -7 | -9 | -8 | 1.61  | 0.46 |
| -7 | 9  | 8  | 0.90  | 0.49 |
| -7 | 9  | 8  | 0.86  | 0.41 |
| -7 | 9  | 8  | 1.08  | 0.62 |
| -7 | -9 | -8 | 2.63  | 0.66 |
| -7 | 9  | 8  | 1.73  | 0.46 |
| -7 | 9  | 8  | 0.89  | 0.39 |
| -7 | 9  | -8 | 1.27  | 0.38 |
| -7 | -9 | 8  | 1.25  | 0.64 |
| -7 | 9  | -8 | 2.01  | 0.53 |
| -7 | 9  | -8 | 0.97  | 0.76 |
| 7  | 9  | 8  | 0.67  | 0.46 |
| -8 | -9 | -8 | 0.81  | 0.32 |
| -8 | 9  | 8  | 0.62  | 0.27 |
| -8 | 9  | 8  | 0.55  | 0.18 |
| -8 | -9 | -8 | 1.17  | 0.37 |

## CIF S3

|    |     |    |       |      |
|----|-----|----|-------|------|
| -8 | -9  | -8 | 0.17  | 0.31 |
| -8 | -9  | -8 | 0.54  | 0.26 |
| -8 | 9   | 8  | 0.28  | 0.29 |
| -8 | 9   | -8 | 0.14  | 0.32 |
| 0  | -10 | -8 | 1.92  | 0.98 |
| 0  | -10 | 8  | 1.46  | 1.31 |
| 0  | -10 | 8  | 1.70  | 0.83 |
| 0  | -10 | 8  | -0.21 | 1.08 |
| 0  | -10 | 8  | 2.18  | 0.73 |
| 0  | -10 | 8  | 1.79  | 0.78 |
| 0  | 10  | 8  | 3.52  | 1.02 |
| 0  | -10 | 8  | 1.35  | 0.76 |
| 0  | -10 | 8  | 1.75  | 1.01 |
| 0  | -10 | 8  | 2.79  | 1.22 |
| 0  | -10 | -8 | -1.44 | 0.99 |
| -1 | 10  | 8  | 11.83 | 1.13 |
| 1  | -10 | 8  | 13.32 | 1.24 |
| 1  | -10 | 8  | 14.14 | 1.34 |
| 1  | -10 | 8  | 14.31 | 1.38 |
| 1  | -10 | 8  | 13.54 | 1.24 |
| -1 | -10 | -8 | 13.05 | 1.14 |
| 1  | -10 | 8  | 12.14 | 1.14 |
| 1  | -10 | 8  | 14.12 | 1.32 |
| -1 | -10 | -8 | 12.20 | 1.32 |
| -1 | 10  | 8  | 13.22 | 1.26 |
| -1 | -10 | -8 | 12.58 | 1.42 |
| 1  | -10 | 8  | 14.63 | 1.30 |
| -1 | -10 | 8  | 14.10 | 1.23 |
| -1 | -10 | 8  | 12.48 | 0.99 |
| -1 | -10 | 8  | 11.09 | 1.21 |
| 1  | 10  | 8  | 12.59 | 1.11 |
| -1 | -10 | 8  | 14.16 | 1.14 |
| -1 | -10 | 8  | 14.67 | 1.21 |
| -1 | -10 | 8  | 11.35 | 1.28 |
| -1 | -10 | 8  | 12.79 | 1.16 |
| -1 | -10 | 8  | 12.63 | 1.17 |
| 1  | 10  | 8  | 12.92 | 1.20 |
| -1 | -10 | 8  | 13.97 | 1.27 |
| 1  | -10 | -8 | 11.66 | 1.45 |
| -1 | -10 | 8  | 13.78 | 1.23 |
| 2  | -10 | 8  | 5.75  | 1.07 |

## CIF S3

|    |     |    |       |      |
|----|-----|----|-------|------|
| 2  | -10 | 8  | 4.08  | 1.40 |
| 2  | -10 | 8  | 5.64  | 1.02 |
| -2 | -10 | -8 | 5.14  | 0.94 |
| -2 | -10 | -8 | 5.06  | 1.32 |
| 2  | -10 | 8  | 7.46  | 1.29 |
| 2  | -10 | 8  | 5.28  | 0.98 |
| 2  | -10 | 8  | 5.23  | 1.05 |
| -2 | 10  | 8  | 5.68  | 0.96 |
| -2 | 10  | 8  | 4.47  | 1.04 |
| -2 | 10  | 8  | 4.60  | 0.92 |
| -2 | 10  | 8  | 3.83  | 0.94 |
| 2  | -10 | 8  | 6.01  | 1.09 |
| 2  | -10 | -8 | 4.30  | 1.41 |
| -2 | -10 | 8  | 6.88  | 1.16 |
| -2 | -10 | 8  | 4.51  | 0.96 |
| -2 | -10 | 8  | 5.64  | 1.18 |
| 2  | 10  | 8  | 5.44  | 0.87 |
| -2 | -10 | 8  | 4.68  | 0.88 |
| -2 | -10 | 8  | 4.55  | 1.02 |
| -2 | -10 | 8  | 6.04  | 0.98 |
| -2 | -10 | 8  | 4.66  | 0.85 |
| -3 | -10 | -8 | 9.29  | 1.21 |
| 3  | -10 | 8  | 9.47  | 1.34 |
| 3  | -10 | 8  | 11.20 | 1.30 |
| -3 | 10  | 8  | 9.21  | 1.37 |
| -3 | -10 | -8 | 10.42 | 1.50 |
| 3  | -10 | 8  | 8.64  | 1.19 |
| -3 | -10 | -8 | 9.48  | 1.21 |
| -3 | 10  | 8  | 9.46  | 0.80 |
| 3  | -10 | 8  | 10.45 | 1.28 |
| -3 | -10 | -8 | 8.28  | 1.51 |
| -3 | 10  | 8  | 9.67  | 1.20 |
| -3 | 10  | 8  | 9.25  | 1.09 |
| -3 | -10 | -8 | 9.14  | 1.14 |
| -3 | 10  | 8  | 10.00 | 1.11 |
| 3  | -10 | 8  | 10.41 | 1.25 |
| 3  | -10 | 8  | 11.74 | 1.59 |
| -3 | -10 | 8  | 10.36 | 0.98 |
| 3  | -10 | -8 | 9.89  | 1.53 |
| 3  | 10  | 8  | 10.21 | 0.99 |
| -3 | -10 | 8  | 10.19 | 1.26 |



## CIF S3

|    |     |    |       |      |
|----|-----|----|-------|------|
| -3 | -10 | 8  | 10.12 | 0.93 |
| -3 | -10 | 8  | 10.36 | 1.27 |
| -3 | -10 | 8  | 9.46  | 0.99 |
| -4 | 10  | 8  | 2.27  | 0.96 |
| -4 | 10  | 8  | 1.81  | 0.74 |
| -4 | -10 | -8 | 5.32  | 1.56 |
| -4 | 10  | 8  | 0.63  | 0.68 |
| -4 | -10 | -8 | 1.09  | 0.75 |
| 4  | -10 | 8  | 2.48  | 0.90 |
| -4 | -10 | -8 | 1.21  | 0.49 |
| -4 | 10  | 8  | 3.87  | 0.94 |
| -4 | -10 | -8 | 2.31  | 0.92 |
| -4 | -10 | -8 | 1.63  | 0.77 |
| -4 | -10 | -8 | 2.20  | 0.74 |
| -4 | -10 | 8  | 2.90  | 0.69 |
| 4  | 10  | 8  | 2.78  | 0.76 |
| -4 | -10 | 8  | 3.52  | 0.99 |
| -4 | -10 | 8  | 1.29  | 0.44 |
| 4  | -10 | -8 | 1.80  | 0.98 |
| -4 | -10 | 8  | 2.42  | 0.57 |
| -4 | -10 | 8  | 1.87  | 0.70 |
| -4 | -10 | 8  | 2.91  | 0.64 |
| -4 | -10 | 8  | 1.56  | 0.56 |
| -5 | 10  | 8  | 3.37  | 0.92 |
| -5 | 10  | 8  | 4.57  | 0.97 |
| -5 | -10 | -8 | 6.30  | 0.96 |
| -5 | -10 | -8 | 5.84  | 1.18 |
| -5 | -10 | -8 | 5.49  | 1.37 |
| -5 | -10 | -8 | 5.93  | 1.21 |
| -5 | 10  | 8  | 5.52  | 0.88 |
| -5 | -10 | -8 | 5.82  | 1.20 |
| -5 | -10 | -8 | 5.68  | 0.76 |
| -5 | -10 | -8 | 2.35  | 0.74 |
| -5 | 10  | 8  | 4.47  | 0.83 |
| 5  | -10 | 8  | 1.61  | 0.75 |
| -5 | 10  | 8  | 4.14  | 1.02 |
| -5 | 10  | 8  | 4.54  | 1.12 |
| -5 | -10 | 8  | 4.61  | 0.59 |
| -5 | -10 | 8  | 4.85  | 1.15 |
| 5  | -10 | -8 | 3.21  | 1.16 |
| 5  | 10  | 8  | 5.46  | 0.78 |

## CIF S3

|    |     |    |      |      |
|----|-----|----|------|------|
| -5 | -10 | 8  | 4.57 | 1.07 |
| -6 | -10 | -8 | 1.64 | 0.56 |
| -6 | -10 | -8 | 3.60 | 1.17 |
| -6 | 10  | 8  | 1.79 | 0.64 |
| -6 | -10 | -8 | 3.13 | 0.77 |
| -6 | 10  | 8  | 3.04 | 0.71 |
| -6 | -10 | -8 | 3.58 | 0.83 |
| -6 | 10  | 8  | 2.60 | 0.75 |
| -6 | 10  | 8  | 2.63 | 0.68 |
| -6 | 10  | 8  | 2.09 | 0.65 |
| -6 | 10  | 8  | 2.83 | 0.68 |
| -6 | 10  | 8  | 2.41 | 0.55 |
| -6 | -10 | -8 | 2.45 | 0.59 |
| -6 | -10 | 8  | 1.95 | 0.69 |
| -6 | 10  | -8 | 2.20 | 0.42 |
| -6 | 10  | -8 | 1.69 | 0.89 |
| -6 | -10 | 8  | 2.83 | 0.30 |
| 6  | -10 | -8 | 2.25 | 1.03 |
| -6 | -10 | 8  | 2.61 | 0.34 |
| 7  | -10 | -8 | 0.62 | 0.56 |
| 0  | -11 | -8 | 1.33 | 0.96 |
| 0  | -11 | 8  | 2.27 | 0.73 |
| 0  | 11  | 8  | 2.10 | 0.69 |
| 0  | -11 | 8  | 1.55 | 0.80 |
| 0  | -11 | 8  | 0.84 | 0.76 |
| 0  | -11 | 8  | 1.57 | 0.68 |
| 0  | -11 | 8  | 1.53 | 0.89 |
| 0  | -11 | -8 | 1.74 | 0.70 |
| 0  | -11 | 8  | 1.63 | 0.66 |
| 0  | -11 | 8  | 1.33 | 0.78 |
| 0  | -11 | 8  | 1.65 | 0.84 |
| 1  | -11 | 8  | 5.15 | 1.05 |
| 1  | -11 | 8  | 5.31 | 1.00 |
| -1 | 11  | 8  | 5.54 | 0.98 |
| 1  | -11 | 8  | 3.73 | 0.91 |
| 1  | -11 | 8  | 5.66 | 1.24 |
| 1  | -11 | 8  | 5.06 | 1.03 |
| -1 | -11 | -8 | 3.55 | 0.88 |
| -1 | -11 | -8 | 5.37 | 0.74 |
| 1  | -11 | 8  | 5.12 | 1.20 |
| 1  | -11 | 8  | 5.08 | 1.16 |

## CIF S3

|    |     |    |       |      |
|----|-----|----|-------|------|
| 1  | -11 | 8  | 5.28  | 1.48 |
| -1 | -11 | 8  | 4.48  | 0.95 |
| -1 | -11 | 8  | 2.87  | 0.75 |
| 1  | 11  | 8  | 5.09  | 0.96 |
| -1 | -11 | 8  | 3.42  | 0.99 |
| -1 | -11 | 8  | 5.27  | 0.99 |
| -1 | -11 | 8  | 4.78  | 0.98 |
| -1 | -11 | 8  | 4.41  | 0.68 |
| -1 | -11 | 8  | 4.67  | 1.01 |
| -1 | -11 | 8  | 3.57  | 0.84 |
| 1  | -11 | -8 | 3.82  | 1.12 |
| -1 | -11 | 8  | 5.87  | 1.12 |
| 1  | -11 | -8 | 3.78  | 0.97 |
| 2  | -11 | 8  | 16.18 | 1.64 |
| -2 | -11 | -8 | 15.22 | 1.47 |
| 2  | -11 | 8  | 16.83 | 1.32 |
| -2 | 11  | 8  | 16.26 | 1.23 |
| 2  | -11 | 8  | 16.85 | 1.45 |
| 2  | -11 | 8  | 16.19 | 1.56 |
| 2  | -11 | 8  | 13.90 | 1.42 |
| 2  | -11 | 8  | 18.06 | 1.52 |
| -2 | 11  | 8  | 13.90 | 1.58 |
| -2 | 11  | 8  | 16.02 | 1.30 |
| -2 | -11 | -8 | 15.31 | 1.42 |
| 2  | -11 | 8  | 14.00 | 1.39 |
| -2 | -11 | 8  | 17.36 | 1.44 |
| 2  | 11  | 8  | 15.55 | 1.19 |
| -2 | -11 | 8  | 17.87 | 1.21 |
| -2 | -11 | 8  | 17.21 | 1.21 |
| 2  | -11 | -8 | 16.88 | 1.46 |
| -2 | -11 | 8  | 18.04 | 1.28 |
| -2 | -11 | 8  | 16.82 | 1.15 |
| -2 | -11 | 8  | 15.38 | 1.18 |
| 3  | -11 | 8  | 6.44  | 1.37 |
| -3 | 11  | 8  | 5.18  | 0.99 |
| -3 | -11 | -8 | 5.02  | 1.30 |
| -3 | 11  | 8  | 5.67  | 1.06 |
| -3 | 11  | 8  | 5.81  | 1.34 |
| 3  | -11 | 8  | 5.63  | 1.28 |
| 3  | -11 | 8  | 6.72  | 1.32 |
| -3 | -11 | -8 | 6.16  | 0.88 |

## CIF S3

|    |     |    |       |      |
|----|-----|----|-------|------|
| -3 | -11 | -8 | 5.06  | 1.11 |
| -3 | 11  | 8  | 6.29  | 1.02 |
| -3 | 11  | 8  | 6.00  | 0.66 |
| -3 | -11 | -8 | 4.50  | 1.12 |
| -3 | -11 | -8 | 4.59  | 1.14 |
| 3  | -11 | 8  | 3.83  | 1.01 |
| -3 | -11 | 8  | 4.08  | 0.78 |
| 3  | -11 | -8 | 6.85  | 1.33 |
| -3 | -11 | 8  | 6.37  | 1.02 |
| -3 | -11 | 8  | 4.56  | 1.11 |
| 3  | 11  | 8  | 6.02  | 0.86 |
| -3 | -11 | 8  | 6.51  | 0.86 |
| -3 | -11 | 8  | 4.67  | 1.26 |
| -4 | -11 | -8 | 1.59  | 0.71 |
| -4 | -11 | -8 | 0.07  | 0.40 |
| -4 | -11 | -8 | 0.65  | 0.59 |
| -4 | 11  | 8  | 0.59  | 0.61 |
| -4 | 11  | 8  | 0.25  | 0.58 |
| -4 | -11 | -8 | 1.00  | 0.74 |
| 4  | -11 | 8  | 0.58  | 0.76 |
| -4 | 11  | 8  | 0.68  | 0.62 |
| -4 | 11  | 8  | 0.12  | 0.88 |
| 4  | 11  | 8  | -0.04 | 0.57 |
| -4 | -11 | 8  | -0.25 | 0.39 |
| -4 | -11 | 8  | -0.17 | 0.42 |
| -4 | -11 | 8  | -0.64 | 0.92 |
| -4 | -11 | 8  | 0.45  | 0.44 |
| -4 | -11 | 8  | 1.00  | 0.38 |
| 4  | -11 | -8 | 1.23  | 0.78 |
| -5 | -11 | -8 | 5.39  | 0.93 |
| -5 | 11  | 8  | 5.05  | 0.69 |
| -5 | -11 | -8 | 7.48  | 1.12 |
| -5 | -11 | -8 | 6.27  | 1.12 |
| -5 | 11  | 8  | 5.16  | 0.79 |
| -5 | 11  | 8  | 6.26  | 1.06 |
| -5 | -11 | -8 | 5.65  | 0.54 |
| -5 | 11  | 8  | 6.03  | 0.92 |
| -5 | 11  | 8  | 5.74  | 0.81 |
| -5 | -11 | -8 | 5.05  | 1.08 |
| -5 | 11  | 8  | 4.26  | 0.80 |
| -5 | -11 | -8 | 3.41  | 0.87 |

## CIF S3

|    |     |    |      |      |
|----|-----|----|------|------|
| -5 | -11 | 8  | 5.57 | 0.96 |
| 5  | -11 | -8 | 6.58 | 1.16 |
| -5 | -11 | 8  | 6.37 | 0.93 |
| -5 | -11 | 8  | 5.19 | 0.56 |
| -6 | 11  | 8  | 1.99 | 0.54 |
| -6 | 11  | 8  | 1.47 | 0.42 |
| -6 | 11  | 8  | 0.98 | 0.40 |
| -6 | -11 | -8 | 1.32 | 0.47 |
| -6 | 11  | 8  | 2.14 | 0.61 |
| -6 | -11 | -8 | 1.18 | 0.51 |
| -6 | -11 | -8 | 1.76 | 0.48 |
| -6 | -11 | -8 | 0.73 | 0.33 |
| -6 | 11  | 8  | 2.03 | 0.54 |
| -6 | 11  | -8 | 1.15 | 0.70 |
| 6  | -11 | -8 | 1.93 | 0.56 |
| -6 | 11  | -8 | 2.03 | 0.52 |
| 0  | -12 | 8  | 1.33 | 0.77 |
| 0  | 12  | 8  | 1.94 | 0.62 |
| 0  | -12 | 8  | 0.65 | 0.71 |
| 0  | -12 | 8  | 0.71 | 0.85 |
| 0  | -12 | -8 | 1.63 | 0.45 |
| 0  | -12 | 8  | 1.46 | 0.76 |
| 0  | -12 | 8  | 0.56 | 0.65 |
| 0  | -12 | 8  | 1.44 | 0.53 |
| 0  | -12 | 8  | 1.17 | 0.68 |
| 0  | -12 | 8  | 0.53 | 0.52 |
| 0  | -12 | 8  | 0.90 | 0.63 |
| 0  | -12 | 8  | 1.10 | 1.00 |
| 0  | -12 | -8 | 1.13 | 0.85 |
| 1  | -12 | 8  | 4.25 | 0.94 |
| -1 | 12  | 8  | 3.04 | 0.63 |
| 1  | -12 | 8  | 3.78 | 1.00 |
| 1  | -12 | 8  | 4.19 | 1.16 |
| 1  | -12 | 8  | 3.69 | 1.09 |
| 1  | -12 | 8  | 3.41 | 0.89 |
| 1  | -12 | 8  | 5.30 | 1.04 |
| 1  | -12 | 8  | 4.72 | 0.96 |
| -1 | -12 | -8 | 2.35 | 0.86 |
| -1 | -12 | 8  | 3.59 | 0.95 |
| -1 | -12 | 8  | 3.64 | 0.86 |
| -1 | -12 | 8  | 2.65 | 0.69 |

## CIF S3

|    |     |    |      |      |
|----|-----|----|------|------|
| -1 | -12 | 8  | 3.31 | 0.87 |
| 1  | -12 | -8 | 3.47 | 0.89 |
| 1  | -12 | -8 | 3.47 | 1.00 |
| 1  | 12  | 8  | 3.58 | 0.95 |
| -1 | -12 | 8  | 1.78 | 0.60 |
| -1 | -12 | 8  | 2.37 | 0.64 |
| -1 | -12 | 8  | 3.30 | 0.66 |
| -2 | 12  | 8  | 3.16 | 0.67 |
| 2  | -12 | 8  | 2.30 | 0.71 |
| -2 | -12 | -8 | 0.95 | 0.80 |
| 2  | -12 | 8  | 1.13 | 0.79 |
| -2 | -12 | -8 | 2.41 | 1.02 |
| -2 | -12 | -8 | 3.04 | 0.60 |
| -2 | 12  | 8  | 3.41 | 0.99 |
| 2  | -12 | 8  | 3.65 | 1.14 |
| 2  | -12 | 8  | 3.51 | 0.98 |
| 2  | -12 | 8  | 3.89 | 1.13 |
| -2 | 12  | 8  | 2.67 | 0.65 |
| 2  | -12 | 8  | 3.66 | 0.95 |
| 2  | -12 | -8 | 2.10 | 0.83 |
| -2 | -12 | 8  | 2.16 | 0.58 |
| -2 | -12 | 8  | 4.33 | 1.06 |
| -2 | -12 | 8  | 3.39 | 0.63 |
| 2  | -12 | -8 | 2.26 | 0.81 |
| 2  | 12  | 8  | 3.61 | 0.91 |
| -2 | -12 | 8  | 3.01 | 0.72 |
| -2 | -12 | 8  | 3.21 | 0.62 |
| -3 | 12  | 8  | 7.56 | 0.93 |
| -3 | -12 | -8 | 6.09 | 0.92 |
| 3  | -12 | 8  | 4.82 | 0.98 |
| -3 | -12 | -8 | 6.79 | 1.01 |
| 3  | -12 | 8  | 6.88 | 1.18 |
| -3 | 12  | 8  | 6.82 | 1.28 |
| -3 | 12  | 8  | 4.67 | 0.95 |
| -3 | -12 | -8 | 6.66 | 0.99 |
| -3 | -12 | -8 | 4.74 | 0.96 |
| -3 | 12  | 8  | 6.65 | 0.94 |
| -3 | -12 | -8 | 5.64 | 1.08 |
| 3  | -12 | 8  | 6.45 | 1.09 |
| -3 | -12 | 8  | 6.09 | 0.87 |
| -3 | -12 | 8  | 6.79 | 0.80 |

## CIF S3

|    |     |    |       |      |
|----|-----|----|-------|------|
| 3  | -12 | -8 | 6.55  | 0.86 |
| 3  | -12 | -8 | 4.78  | 1.10 |
| -3 | -12 | 8  | 6.91  | 0.74 |
| -4 | 12  | 8  | -0.11 | 0.53 |
| -4 | -12 | -8 | 0.00  | 0.43 |
| -4 | 12  | 8  | -0.28 | 0.50 |
| -4 | -12 | -8 | 0.82  | 0.83 |
| -4 | 12  | 8  | 0.08  | 0.77 |
| -4 | -12 | -8 | 0.37  | 0.34 |
| -4 | 12  | 8  | -0.34 | 0.75 |
| -4 | -12 | -8 | 0.80  | 0.86 |
| -4 | -12 | -8 | 0.00  | 0.61 |
| -4 | -12 | 8  | -0.10 | 0.43 |
| 4  | -12 | -8 | 0.56  | 0.51 |
| -4 | -12 | 8  | -0.02 | 0.31 |
| -4 | -12 | 8  | 0.27  | 0.38 |
| -5 | 12  | 8  | 4.99  | 0.60 |
| -5 | -12 | -8 | 3.87  | 0.80 |
| -5 | -12 | -8 | 5.89  | 0.87 |
| -5 | 12  | 8  | 6.33  | 0.74 |
| -5 | 12  | 8  | 5.94  | 0.68 |
| -5 | 12  | 8  | 4.61  | 0.83 |
| -5 | -12 | -8 | 3.07  | 0.79 |
| -5 | 12  | 8  | 5.07  | 0.66 |
| -5 | -12 | -8 | 5.02  | 0.98 |
| 5  | -12 | -8 | 5.32  | 0.75 |
| -5 | -12 | 8  | 5.19  | 0.48 |
| -5 | 12  | -8 | 5.68  | 0.60 |
| -5 | -12 | 8  | 6.09  | 0.47 |
| 0  | -13 | 8  | 0.40  | 0.56 |
| 0  | -13 | 8  | 0.36  | 0.53 |
| 0  | -13 | -8 | 0.61  | 0.73 |
| 0  | -13 | 8  | 0.11  | 0.43 |
| 0  | 13  | 8  | 0.05  | 0.48 |
| 0  | -13 | 8  | -0.01 | 0.60 |
| 0  | -13 | 8  | 0.43  | 0.54 |
| 0  | -13 | 8  | 0.40  | 0.64 |
| 0  | -13 | 8  | 0.18  | 0.79 |
| -1 | -13 | -8 | 0.08  | 0.67 |
| 1  | -13 | 8  | 1.26  | 0.51 |
| 1  | -13 | 8  | 0.66  | 0.55 |

## CIF S3

|    |     |    |       |      |
|----|-----|----|-------|------|
| 1  | -13 | 8  | 0.60  | 0.39 |
| 1  | -13 | 8  | -0.23 | 0.81 |
| 1  | -13 | 8  | 0.51  | 0.68 |
| -1 | 13  | 8  | 1.37  | 0.55 |
| 1  | -13 | 8  | 0.61  | 0.57 |
| -1 | -13 | 8  | 0.42  | 0.55 |
| -1 | -13 | 8  | 0.31  | 0.54 |
| 1  | 13  | 8  | 1.51  | 0.50 |
| -1 | -13 | 8  | 1.74  | 0.86 |
| -1 | -13 | 8  | 0.07  | 0.45 |
| -1 | -13 | 8  | 1.28  | 0.56 |
| 1  | -13 | -8 | 0.78  | 0.67 |
| -1 | -13 | 8  | 0.38  | 0.52 |
| -1 | -13 | 8  | 1.48  | 0.53 |
| 2  | -13 | 8  | 3.64  | 0.96 |
| -2 | 13  | 8  | 4.83  | 0.76 |
| 2  | -13 | 8  | 2.81  | 0.70 |
| -2 | 13  | 8  | 2.73  | 0.53 |
| -2 | 13  | 8  | 2.32  | 0.85 |
| 2  | -13 | 8  | 2.46  | 0.74 |
| -2 | -13 | -8 | 2.22  | 0.74 |
| 2  | -13 | 8  | 3.66  | 0.83 |
| -2 | -13 | 8  | 1.05  | 0.53 |
| -2 | -13 | 8  | 2.86  | 0.59 |
| 2  | -13 | -8 | 2.55  | 0.70 |
| -2 | -13 | 8  | 3.57  | 0.71 |
| 2  | -13 | -8 | 3.95  | 0.83 |
| 3  | -13 | 8  | 1.02  | 0.69 |
| -3 | 13  | 8  | 0.88  | 0.54 |
| -3 | 13  | 8  | 1.59  | 0.47 |
| 3  | -13 | 8  | 0.89  | 0.60 |
| -3 | -13 | -8 | 0.79  | 0.61 |
| -3 | -13 | -8 | 1.34  | 0.48 |
| -3 | 13  | 8  | 0.73  | 0.74 |
| -3 | -13 | 8  | 0.52  | 0.44 |
| 3  | -13 | -8 | 1.52  | 0.53 |
| -3 | -13 | 8  | 1.92  | 0.55 |
| -3 | -13 | 8  | 1.16  | 0.40 |
| -4 | 13  | 8  | 3.45  | 0.85 |
| -4 | -13 | -8 | 5.47  | 0.72 |
| -4 | 13  | 8  | 3.58  | 0.61 |



## CIF S3

|    |     |    |       |      |
|----|-----|----|-------|------|
| 4  | -13 | 8  | 3.10  | 0.68 |
| -4 | 13  | 8  | 4.62  | 0.65 |
| 4  | -13 | -8 | 4.99  | 0.74 |
| -4 | -13 | 8  | 4.55  | 0.49 |
| -4 | -13 | 8  | 5.07  | 0.50 |
| 0  | -14 | 8  | 0.26  | 0.37 |
| 0  | 14  | 8  | -0.30 | 0.49 |
| 0  | -14 | -8 | -1.32 | 0.68 |
| 0  | -14 | 8  | 0.23  | 0.32 |
| 0  | -14 | 8  | -0.03 | 0.46 |
| 0  | -14 | 8  | -0.06 | 0.41 |
| 0  | -14 | 8  | -0.03 | 0.43 |
| 0  | -14 | 8  | 1.40  | 0.65 |
| -1 | 14  | 8  | 0.43  | 0.37 |
| 1  | -14 | 8  | -0.09 | 0.43 |
| -1 | 14  | 8  | 0.12  | 0.29 |
| 1  | -14 | 8  | 1.42  | 0.67 |
| -1 | -14 | -8 | 0.23  | 0.64 |
| 1  | -14 | 8  | 0.17  | 0.44 |
| -1 | -14 | 8  | 0.00  | 0.34 |
| -1 | -14 | 8  | 0.33  | 0.41 |
| -1 | -14 | 8  | -0.04 | 0.57 |
| -1 | -14 | 8  | -0.05 | 0.38 |
| -1 | -14 | 8  | 0.16  | 0.38 |
| 1  | -14 | -8 | -0.25 | 0.65 |
| 2  | -14 | 8  | 0.39  | 0.44 |
| -2 | 14  | 8  | 1.38  | 0.36 |
| -2 | -14 | -8 | 0.51  | 0.66 |
| -2 | -14 | -8 | 0.83  | 0.48 |
| 2  | -14 | 8  | 0.79  | 0.58 |
| -2 | 14  | 8  | 2.11  | 0.66 |
| 2  | -14 | 8  | 1.66  | 0.45 |
| -2 | -14 | 8  | 1.07  | 0.33 |
| 2  | -14 | -8 | 1.37  | 0.62 |
| -2 | -14 | 8  | 0.69  | 0.35 |
| -2 | -14 | 8  | 1.45  | 0.36 |
| -2 | -14 | 8  | 1.28  | 0.36 |
| 0  | 0   | -9 | -0.11 | 0.75 |
| 0  | 0   | -9 | 0.60  | 0.61 |
| 0  | 0   | -9 | 1.22  | 0.71 |
| 0  | 0   | 9  | 0.10  | 0.34 |

## CIF S3

|    |   |    |       |      |
|----|---|----|-------|------|
| 0  | 0 | -9 | 1.17  | 0.68 |
| 1  | 0 | -9 | 0.38  | 0.71 |
| 1  | 0 | 9  | -0.17 | 0.78 |
| -1 | 0 | -9 | 0.08  | 0.68 |
| -1 | 0 | -9 | 0.12  | 0.76 |
| -1 | 0 | -9 | 1.02  | 0.76 |
| 1  | 0 | -9 | 0.09  | 0.53 |
| 1  | 0 | -9 | 0.73  | 0.67 |
| -1 | 0 | -9 | 0.57  | 0.68 |
| -1 | 0 | 9  | 0.41  | 0.57 |
| 1  | 0 | 9  | 0.40  | 0.34 |
| -1 | 0 | 9  | 0.36  | 0.28 |
| 1  | 0 | -9 | 1.17  | 0.65 |
| -2 | 0 | 9  | 10.85 | 1.16 |
| -2 | 0 | 9  | 11.66 | 0.74 |
| 2  | 0 | -9 | 10.87 | 0.94 |
| -2 | 0 | -9 | 11.00 | 1.05 |
| 2  | 0 | 9  | 11.65 | 1.63 |
| 2  | 0 | -9 | 12.20 | 1.05 |
| -2 | 0 | -9 | 10.53 | 1.06 |
| 2  | 0 | -9 | 12.33 | 1.15 |
| 2  | 0 | 9  | 11.94 | 0.83 |
| -2 | 0 | -9 | 11.17 | 1.52 |
| -2 | 0 | -9 | 12.09 | 1.04 |
| -3 | 0 | 9  | 1.94  | 0.48 |
| 3  | 0 | 9  | -0.01 | 0.89 |
| 3  | 0 | 9  | 2.54  | 0.56 |
| -3 | 0 | -9 | 2.91  | 0.82 |
| 3  | 0 | -9 | 1.42  | 0.66 |
| -3 | 0 | -9 | 0.09  | 0.82 |
| -3 | 0 | -9 | 2.40  | 0.69 |
| 3  | 0 | -9 | 1.84  | 0.50 |
| 3  | 0 | -9 | 1.66  | 0.55 |
| -3 | 0 | 9  | 1.93  | 0.35 |
| -3 | 0 | 9  | 1.31  | 0.28 |
| -4 | 0 | -9 | 17.50 | 1.32 |
| -4 | 0 | 9  | 18.63 | 0.98 |
| 4  | 0 | 9  | 17.47 | 1.18 |
| -4 | 0 | -9 | 18.09 | 1.61 |
| -4 | 0 | 9  | 18.10 | 1.04 |
| -4 | 0 | 9  | 17.11 | 1.32 |

## CIF S3

|     |    |    |       |      |
|-----|----|----|-------|------|
| 4   | 0  | -9 | 16.84 | 1.25 |
| 4   | 0  | -9 | 18.89 | 1.08 |
| 5   | 0  | 9  | 9.74  | 1.08 |
| -5  | 0  | -9 | 9.50  | 1.10 |
| -5  | 0  | -9 | 8.32  | 0.84 |
| -5  | 0  | 9  | 8.82  | 1.07 |
| -5  | 0  | -9 | 8.87  | 1.25 |
| 5   | 0  | -9 | 9.16  | 0.69 |
| -5  | 0  | 9  | 9.25  | 0.59 |
| -6  | 0  | -9 | 0.74  | 0.69 |
| -6  | 0  | 9  | 0.94  | 0.72 |
| -6  | 0  | -9 | 1.08  | 0.52 |
| 6   | 0  | 9  | 0.40  | 0.72 |
| -6  | 0  | 9  | 0.12  | 0.24 |
| -7  | 0  | 9  | 0.05  | 0.21 |
| -7  | 0  | -9 | 0.74  | 1.00 |
| -7  | 0  | -9 | 0.12  | 1.13 |
| -7  | 0  | -9 | 1.09  | 0.51 |
| -7  | 0  | -9 | 0.87  | 0.60 |
| -7  | 0  | -9 | 0.00  | 0.56 |
| -8  | 0  | -9 | 4.65  | 1.09 |
| -8  | 0  | -9 | 4.11  | 0.77 |
| -8  | 0  | -9 | 2.99  | 0.93 |
| -8  | 0  | -9 | 4.58  | 0.75 |
| -8  | 0  | -9 | 3.77  | 0.86 |
| -8  | 0  | -9 | 4.88  | 0.77 |
| -9  | 0  | -9 | 1.00  | 0.40 |
| -9  | 0  | -9 | 0.70  | 0.40 |
| 9   | 0  | 9  | 0.86  | 0.73 |
| -9  | 0  | -9 | 0.73  | 0.44 |
| -9  | 0  | -9 | 0.56  | 0.79 |
| -9  | 0  | -9 | 0.22  | 0.39 |
| 10  | 0  | 9  | 1.73  | 0.47 |
| -10 | 0  | -9 | 2.68  | 0.36 |
| -10 | 0  | -9 | 2.77  | 0.64 |
| -10 | 0  | -9 | 3.05  | 0.45 |
| 0   | 1  | -9 | 8.01  | 1.15 |
| 0   | 1  | -9 | 7.05  | 1.27 |
| 0   | 1  | -9 | 7.08  | 0.77 |
| 0   | -1 | -9 | 7.21  | 1.23 |
| 0   | 1  | -9 | 6.66  | 0.94 |

## CIF S3

|    |    |    |       |      |
|----|----|----|-------|------|
| 0  | 1  | 9  | 5.98  | 0.54 |
| 0  | -1 | -9 | 6.61  | 0.93 |
| 0  | -1 | 9  | 6.88  | 0.60 |
| 0  | 1  | -9 | 4.72  | 1.03 |
| 0  | -1 | -9 | 3.96  | 1.21 |
| 0  | -1 | -9 | 6.00  | 0.82 |
| -1 | -1 | -9 | 32.75 | 1.99 |
| 1  | 1  | -9 | 38.71 | 2.03 |
| 1  | -1 | 9  | 33.06 | 1.80 |
| 1  | 1  | -9 | 31.46 | 2.21 |
| -1 | 1  | 9  | 32.64 | 1.77 |
| -1 | -1 | -9 | 39.17 | 2.54 |
| -1 | -1 | -9 | 34.04 | 2.09 |
| 1  | 1  | -9 | 36.00 | 1.93 |
| -1 | 1  | 9  | 30.80 | 2.27 |
| -1 | -1 | -9 | 32.30 | 2.44 |
| -1 | 1  | -9 | 35.58 | 2.12 |
| 1  | -1 | -9 | 35.94 | 2.09 |
| 1  | -1 | -9 | 35.21 | 1.96 |
| -1 | 1  | -9 | 28.41 | 2.30 |
| 1  | -1 | -9 | 34.87 | 2.36 |
| -1 | -1 | 9  | 35.32 | 2.20 |
| -1 | 1  | -9 | 33.22 | 1.97 |
| -1 | -1 | 9  | 32.82 | 1.77 |
| -1 | 1  | -9 | 36.24 | 2.48 |
| 1  | 1  | 9  | 35.72 | 1.81 |
| 1  | 1  | 9  | 28.61 | 2.49 |
| 1  | -1 | -9 | 29.45 | 2.29 |
| -2 | -1 | -9 | 13.50 | 2.09 |
| 2  | -1 | 9  | 7.30  | 1.48 |
| -2 | 1  | 9  | 9.51  | 0.63 |
| -2 | -1 | -9 | 8.33  | 1.42 |
| -2 | -1 | -9 | 9.71  | 1.00 |
| -2 | 1  | 9  | 8.41  | 1.09 |
| 2  | -1 | 9  | 9.38  | 0.75 |
| 2  | 1  | -9 | 9.39  | 0.80 |
| -2 | 1  | 9  | 9.19  | 0.80 |
| 2  | 1  | -9 | 8.14  | 0.70 |
| 2  | 1  | -9 | 7.51  | 0.88 |
| -2 | -1 | -9 | 8.58  | 0.93 |
| -2 | -1 | 9  | 10.65 | 1.03 |

## CIF S3

|    |    |    |       |      |
|----|----|----|-------|------|
| -2 | 1  | -9 | 9.41  | 0.82 |
| -2 | 1  | -9 | 8.69  | 0.97 |
| -2 | -1 | 9  | 8.74  | 0.94 |
| -2 | -1 | 9  | 8.79  | 0.61 |
| 2  | -1 | -9 | 9.29  | 0.92 |
| 2  | 1  | 9  | 8.52  | 0.71 |
| 2  | -1 | -9 | 5.97  | 1.12 |
| 2  | 1  | 9  | 10.24 | 1.61 |
| -2 | 1  | -9 | 7.57  | 1.40 |
| -2 | 1  | -9 | 9.15  | 0.93 |
| -2 | 1  | -9 | 8.77  | 0.95 |
| 2  | -1 | -9 | 9.95  | 1.00 |
| -3 | -1 | -9 | 33.08 | 2.69 |
| 3  | 1  | -9 | 37.14 | 1.93 |
| -3 | -1 | -9 | 36.95 | 2.28 |
| -3 | 1  | 9  | 39.23 | 1.89 |
| 3  | -1 | 9  | 39.39 | 2.01 |
| 3  | 1  | -9 | 38.16 | 2.01 |
| -3 | 1  | 9  | 37.17 | 1.93 |
| 3  | 1  | -9 | 35.83 | 2.07 |
| -3 | -1 | -9 | 35.83 | 2.16 |
| 3  | -1 | -9 | 36.62 | 2.17 |
| -3 | 1  | -9 | 37.48 | 2.08 |
| 3  | -1 | -9 | 36.61 | 1.99 |
| -3 | -1 | 9  | 37.70 | 1.91 |
| -3 | 1  | -9 | 37.98 | 2.24 |
| -3 | -1 | 9  | 36.10 | 1.83 |
| 3  | 1  | 9  | 35.47 | 1.98 |
| -3 | 1  | -9 | 36.43 | 2.12 |
| -3 | 1  | -9 | 37.18 | 2.72 |
| -3 | -1 | 9  | 35.83 | 1.88 |
| 3  | -1 | -9 | 36.75 | 2.08 |
| -4 | 1  | 9  | 7.94  | 0.86 |
| -4 | 1  | 9  | 7.53  | 0.65 |
| -4 | -1 | -9 | 7.97  | 0.95 |
| 4  | -1 | 9  | 8.24  | 0.82 |
| -4 | -1 | -9 | 8.32  | 1.16 |
| -4 | 1  | 9  | 8.62  | 0.48 |
| 4  | 1  | -9 | 8.35  | 0.60 |
| -4 | 1  | 9  | 9.28  | 0.59 |
| 4  | -1 | -9 | 8.60  | 0.71 |

## CIF S3

|    |    |    |       |      |
|----|----|----|-------|------|
| -4 | 1  | -9 | 6.20  | 1.05 |
| -4 | -1 | 9  | 7.44  | 0.60 |
| 4  | -1 | -9 | 8.12  | 0.85 |
| -4 | -1 | 9  | 7.63  | 0.54 |
| 4  | 1  | 9  | 7.03  | 0.75 |
| -4 | 1  | -9 | 8.21  | 1.26 |
| 4  | -1 | -9 | 7.24  | 0.97 |
| 4  | -1 | -9 | 8.28  | 0.78 |
| -4 | -1 | 9  | 7.29  | 0.83 |
| -5 | 1  | 9  | 22.29 | 1.16 |
| -5 | -1 | -9 | 19.82 | 1.30 |
| -5 | -1 | -9 | 20.53 | 1.52 |
| -5 | 1  | 9  | 20.73 | 1.19 |
| 5  | 1  | -9 | 22.45 | 1.16 |
| -5 | 1  | 9  | 19.61 | 1.40 |
| 5  | 1  | 9  | 20.14 | 1.52 |
| -5 | 1  | -9 | 20.46 | 1.53 |
| 5  | -1 | -9 | 21.66 | 1.33 |
| -5 | 1  | -9 | 19.20 | 1.69 |
| -5 | 1  | -9 | 21.17 | 1.33 |
| -5 | -1 | 9  | 19.96 | 1.38 |
| -5 | -1 | 9  | 22.07 | 1.12 |
| 5  | -1 | -9 | 21.46 | 1.26 |
| -6 | -1 | -9 | 5.71  | 1.07 |
| 6  | -1 | 9  | 10.03 | 1.18 |
| -6 | -1 | -9 | 10.01 | 0.91 |
| -6 | 1  | 9  | 9.83  | 0.66 |
| -6 | -1 | -9 | 9.50  | 0.96 |
| -6 | 1  | -9 | 8.28  | 1.14 |
| -6 | 1  | -9 | 10.67 | 1.56 |
| 6  | 1  | 9  | 10.75 | 1.17 |
| -6 | -1 | 9  | 9.78  | 0.57 |
| -6 | -1 | 9  | 10.73 | 1.04 |
| -6 | 1  | -9 | 11.28 | 0.91 |
| -7 | 1  | 9  | 49.49 | 2.36 |
| -7 | -1 | -9 | 46.84 | 2.81 |
| -7 | -1 | -9 | 45.60 | 2.82 |
| -7 | -1 | -9 | 50.41 | 2.57 |
| -7 | 1  | 9  | 47.61 | 2.36 |
| -7 | -1 | -9 | 46.19 | 2.54 |
| -7 | -1 | -9 | 48.55 | 2.56 |

## CIF S3

|     |    |    |       |      |
|-----|----|----|-------|------|
| -7  | 1  | 9  | 49.41 | 2.38 |
| -7  | 1  | -9 | 48.97 | 2.86 |
| -7  | 1  | -9 | 39.78 | 2.68 |
| -7  | 1  | -9 | 47.68 | 2.42 |
| -7  | 1  | -9 | 47.08 | 2.56 |
| -7  | 1  | -9 | 49.62 | 2.54 |
| -7  | 1  | -9 | 47.15 | 2.76 |
| -8  | -1 | -9 | 4.26  | 1.01 |
| -8  | -1 | -9 | 6.62  | 1.42 |
| -8  | -1 | -9 | 5.72  | 0.80 |
| -8  | -1 | -9 | 6.71  | 0.83 |
| -8  | -1 | -9 | 6.02  | 0.82 |
| -8  | -1 | -9 | 5.01  | 0.71 |
| -8  | -1 | -9 | 6.30  | 0.84 |
| -8  | 1  | -9 | 5.71  | 0.82 |
| -8  | 1  | -9 | 5.84  | 0.94 |
| -8  | 1  | -9 | 5.85  | 0.84 |
| -8  | 1  | -9 | 6.01  | 0.83 |
| -8  | 1  | -9 | 6.23  | 1.35 |
| -9  | -1 | -9 | 0.76  | 0.38 |
| 9   | -1 | 9  | 0.58  | 0.50 |
| -9  | -1 | -9 | 0.34  | 0.52 |
| -9  | -1 | -9 | 0.16  | 0.38 |
| -9  | -1 | -9 | 0.45  | 0.66 |
| -9  | -1 | -9 | 0.95  | 1.07 |
| -9  | -1 | -9 | 0.26  | 0.37 |
| -9  | 1  | -9 | 0.21  | 0.39 |
| -9  | 1  | -9 | 0.18  | 0.42 |
| -9  | 1  | -9 | 0.31  | 0.47 |
| -9  | 1  | -9 | 0.16  | 0.72 |
| -9  | 1  | -9 | 0.49  | 0.39 |
| -10 | -1 | -9 | 3.95  | 0.46 |
| -10 | -1 | -9 | 3.62  | 0.44 |
| 10  | -1 | 9  | 4.24  | 0.53 |
| -10 | -1 | -9 | 3.93  | 0.49 |
| 10  | 1  | 9  | 4.08  | 0.63 |
| -10 | 1  | -9 | 4.84  | 0.44 |
| -10 | 1  | -9 | 3.77  | 0.40 |
| 0   | -2 | -9 | 11.75 | 1.12 |
| 0   | -2 | -9 | 10.39 | 1.48 |
| 0   | -2 | -9 | 13.14 | 1.24 |

## CIF S3

|    |    |    |       |      |
|----|----|----|-------|------|
| 0  | 2  | -9 | 11.19 | 1.24 |
| 0  | -2 | 9  | 11.44 | 0.74 |
| 0  | 2  | -9 | 11.43 | 1.47 |
| 0  | 2  | 9  | 10.44 | 0.75 |
| 0  | 2  | -9 | 11.31 | 1.01 |
| 0  | 2  | -9 | 9.99  | 1.29 |
| 0  | 2  | -9 | 11.02 | 1.02 |
| 0  | -2 | -9 | 10.98 | 1.39 |
| 1  | 2  | -9 | 13.84 | 1.28 |
| -1 | -2 | -9 | 14.33 | 1.16 |
| -1 | -2 | -9 | 14.41 | 1.36 |
| -1 | -2 | -9 | 14.04 | 1.61 |
| 1  | 2  | -9 | 12.93 | 1.03 |
| -1 | 2  | 9  | 14.26 | 0.84 |
| 1  | 2  | -9 | 12.20 | 1.09 |
| 1  | -2 | 9  | 13.71 | 0.95 |
| -1 | -2 | -9 | 15.18 | 2.14 |
| 1  | -2 | -9 | 12.91 | 1.25 |
| -1 | 2  | -9 | 15.49 | 1.28 |
| -1 | 2  | -9 | 14.55 | 1.10 |
| 1  | -2 | -9 | 10.10 | 1.52 |
| -1 | -2 | 9  | 13.40 | 0.86 |
| -1 | 2  | -9 | 14.06 | 1.11 |
| 1  | -2 | -9 | 11.73 | 1.09 |
| -1 | -2 | 9  | 14.05 | 1.35 |
| 1  | 2  | 9  | 17.43 | 1.76 |
| 1  | 2  | 9  | 14.23 | 0.89 |
| -1 | 2  | -9 | 15.29 | 1.64 |
| -2 | -2 | -9 | 86.10 | 5.28 |
| 2  | 2  | -9 | 94.78 | 4.66 |
| 2  | -2 | 9  | 92.97 | 4.62 |
| -2 | -2 | -9 | 91.77 | 4.73 |
| -2 | 2  | 9  | 99.85 | 5.01 |
| 2  | 2  | -9 | 93.72 | 4.59 |
| 2  | 2  | -9 | 86.92 | 4.70 |
| -2 | 2  | 9  | 86.24 | 4.57 |
| -2 | 2  | 9  | 95.10 | 4.77 |
| 2  | 2  | 9  | 94.55 | 5.42 |
| 2  | 2  | 9  | 87.35 | 5.57 |
| 2  | -2 | -9 | 86.62 | 4.71 |
| -2 | 2  | -9 | 95.13 | 4.75 |



## CIF S3

|    |    |    |       |      |
|----|----|----|-------|------|
| 2  | -2 | -9 | 91.14 | 4.82 |
| -2 | 2  | -9 | 93.62 | 4.65 |
| -2 | -2 | 9  | 94.39 | 4.56 |
| -2 | -2 | 9  | 89.38 | 4.54 |
| 2  | 2  | 9  | 87.86 | 4.61 |
| -2 | 2  | -9 | 96.85 | 4.77 |
| -2 | -2 | 9  | 94.46 | 4.86 |
| -3 | 2  | 9  | 20.93 | 1.51 |
| -3 | 2  | 9  | 21.53 | 1.22 |
| -3 | -2 | -9 | 20.24 | 2.01 |
| 3  | 2  | -9 | 21.14 | 1.37 |
| 3  | 2  | -9 | 22.17 | 1.23 |
| -3 | -2 | -9 | 19.09 | 1.50 |
| 3  | -2 | 9  | 23.94 | 1.37 |
| 3  | 2  | -9 | 24.15 | 1.32 |
| -3 | 2  | 9  | 21.35 | 1.27 |
| 3  | -2 | 9  | 21.94 | 2.08 |
| -3 | -2 | -9 | 21.86 | 1.48 |
| 3  | -2 | -9 | 23.72 | 1.53 |
| -3 | -2 | 9  | 21.93 | 1.18 |
| 3  | 2  | 9  | 21.80 | 2.18 |
| -3 | -2 | 9  | 21.38 | 1.22 |
| 3  | -2 | -9 | 22.32 | 1.40 |
| -3 | 2  | -9 | 21.34 | 1.53 |
| -3 | 2  | -9 | 21.87 | 1.39 |
| -3 | 2  | -9 | 23.62 | 1.57 |
| 3  | 2  | 9  | 21.31 | 1.31 |
| 3  | -2 | -9 | 21.73 | 1.59 |
| -3 | -2 | 9  | 22.15 | 1.11 |
| -3 | 2  | -9 | 22.22 | 2.10 |
| -3 | -2 | 9  | 22.62 | 1.11 |
| -4 | -2 | -9 | 6.08  | 1.00 |
| 4  | -2 | 9  | 7.63  | 0.82 |
| -4 | 2  | 9  | 5.11  | 0.60 |
| -4 | -2 | -9 | 6.29  | 0.94 |
| -4 | 2  | 9  | 6.76  | 0.84 |
| -4 | 2  | 9  | 6.89  | 0.59 |
| -4 | 2  | 9  | 7.02  | 0.68 |
| 4  | 2  | -9 | 6.63  | 0.54 |
| 4  | -2 | -9 | 5.92  | 1.07 |
| 4  | -2 | -9 | 7.77  | 0.82 |

## CIF S3

|    |    |    |       |      |
|----|----|----|-------|------|
| 4  | -2 | -9 | 6.04  | 0.98 |
| -4 | 2  | -9 | 8.29  | 1.28 |
| -4 | -2 | 9  | 6.85  | 0.49 |
| -4 | 2  | -9 | 6.67  | 0.92 |
| -4 | 2  | -9 | 7.87  | 1.04 |
| -4 | -2 | 9  | 4.82  | 0.77 |
| -4 | -2 | 9  | 7.21  | 0.53 |
| 4  | 2  | 9  | 6.73  | 0.84 |
| -5 | -2 | -9 | 2.85  | 0.81 |
| 5  | 2  | -9 | 3.67  | 0.39 |
| -5 | -2 | -9 | 1.65  | 0.76 |
| -5 | 2  | 9  | 2.82  | 0.63 |
| -5 | 2  | 9  | 3.52  | 0.51 |
| -5 | -2 | -9 | 5.19  | 0.96 |
| -5 | 2  | 9  | 3.69  | 0.97 |
| -5 | -2 | 9  | 4.40  | 0.73 |
| -5 | -2 | 9  | 3.17  | 0.36 |
| 5  | 2  | 9  | 3.62  | 0.87 |
| 5  | -2 | -9 | 3.24  | 0.96 |
| -5 | 2  | -9 | 2.68  | 0.94 |
| 5  | -2 | -9 | 4.53  | 0.74 |
| -5 | 2  | -9 | 4.10  | 0.84 |
| -5 | 2  | -9 | 1.90  | 0.73 |
| -5 | -2 | 9  | 2.75  | 1.01 |
| -6 | -2 | -9 | 16.97 | 1.25 |
| -6 | 2  | 9  | 16.43 | 1.01 |
| -6 | -2 | -9 | 15.97 | 1.15 |
| -6 | 2  | 9  | 16.30 | 1.04 |
| -6 | -2 | 9  | 16.88 | 0.84 |
| -6 | 2  | -9 | 17.00 | 1.65 |
| -6 | 2  | -9 | 17.08 | 1.19 |
| 6  | 2  | 9  | 17.37 | 1.44 |
| -6 | 2  | -9 | 13.90 | 1.38 |
| -7 | 2  | 9  | 2.33  | 0.49 |
| -7 | -2 | -9 | 3.36  | 0.83 |
| -7 | 2  | 9  | 4.15  | 0.49 |
| -7 | -2 | -9 | 5.08  | 0.83 |
| -7 | -2 | -9 | 4.25  | 1.15 |
| -7 | 2  | 9  | 3.62  | 0.49 |
| -7 | -2 | -9 | 3.93  | 1.13 |
| -7 | -2 | -9 | 4.41  | 0.88 |

## CIF S3

|    |    |    |       |      |
|----|----|----|-------|------|
| -7 | 2  | -9 | 3.75  | 1.06 |
| -7 | 2  | -9 | 4.10  | 0.59 |
| -7 | 2  | -9 | 5.17  | 0.89 |
| -7 | 2  | -9 | 3.06  | 0.83 |
| 8  | -2 | 9  | 7.00  | 1.00 |
| -8 | -2 | -9 | 5.65  | 0.74 |
| -8 | -2 | -9 | 5.77  | 1.29 |
| -8 | -2 | -9 | 6.49  | 0.78 |
| -8 | 2  | 9  | 4.80  | 0.38 |
| -8 | -2 | -9 | 5.88  | 0.81 |
| -8 | -2 | -9 | 4.00  | 1.05 |
| -8 | -2 | -9 | 4.94  | 0.62 |
| -8 | 2  | 9  | 5.71  | 0.36 |
| -8 | -2 | -9 | 6.04  | 0.76 |
| -8 | 2  | -9 | 5.39  | 0.85 |
| -8 | 2  | -9 | 4.52  | 1.33 |
| -8 | 2  | -9 | 4.78  | 0.79 |
| -8 | 2  | -9 | 4.93  | 1.21 |
| -8 | 2  | -9 | 6.17  | 0.80 |
| -9 | -2 | -9 | 1.14  | 0.67 |
| -9 | -2 | -9 | 3.49  | 0.63 |
| -9 | -2 | -9 | 1.43  | 0.41 |
| -9 | -2 | -9 | 2.46  | 0.53 |
| -9 | -2 | -9 | 0.34  | 0.75 |
| 9  | -2 | 9  | 2.41  | 0.51 |
| -9 | 2  | -9 | 2.63  | 0.64 |
| -9 | 2  | -9 | 2.29  | 0.73 |
| -9 | 2  | -9 | 2.32  | 0.44 |
| -9 | 2  | -9 | 2.52  | 0.67 |
| -9 | 2  | -9 | 1.52  | 0.73 |
| 0  | -3 | 9  | 50.67 | 2.67 |
| 0  | -3 | -9 | 47.04 | 3.33 |
| 0  | -3 | -9 | 49.05 | 2.98 |
| 0  | 3  | -9 | 56.45 | 3.32 |
| 0  | -3 | -9 | 53.62 | 2.92 |
| 0  | 3  | -9 | 56.62 | 2.92 |
| 0  | 3  | -9 | 54.51 | 2.84 |
| 0  | 3  | 9  | 50.80 | 2.70 |
| -1 | 3  | 9  | 0.89  | 0.34 |
| -1 | -3 | -9 | 0.56  | 0.79 |
| 1  | 3  | -9 | 0.51  | 0.50 |

## CIF S3

|    |    |    |       |      |
|----|----|----|-------|------|
| 1  | 3  | -9 | 0.34  | 0.57 |
| -1 | -3 | -9 | 0.25  | 0.79 |
| 1  | -3 | 9  | 0.52  | 0.49 |
| -1 | 3  | -9 | 0.59  | 0.64 |
| 1  | -3 | -9 | -1.52 | 0.82 |
| -1 | -3 | 9  | 0.80  | 0.48 |
| -1 | 3  | -9 | 0.47  | 0.62 |
| -1 | 3  | -9 | 0.93  | 0.65 |
| 1  | 3  | 9  | 0.56  | 0.41 |
| 1  | 3  | 9  | 0.52  | 0.85 |
| -1 | -3 | 9  | 0.17  | 0.67 |
| -1 | -3 | 9  | 0.42  | 0.37 |
| 1  | -3 | -9 | 0.39  | 0.79 |
| 1  | -3 | -9 | 0.17  | 0.89 |
| -1 | 3  | -9 | 1.29  | 0.85 |
| 2  | 3  | -9 | 4.83  | 0.64 |
| 2  | -3 | 9  | 4.32  | 0.69 |
| -2 | 3  | 9  | 4.79  | 0.97 |
| -2 | -3 | -9 | 3.13  | 0.87 |
| -2 | 3  | 9  | 4.02  | 0.67 |
| 2  | -3 | 9  | 4.07  | 1.39 |
| 2  | 3  | -9 | 4.68  | 0.80 |
| 2  | 3  | -9 | 5.08  | 0.71 |
| -2 | -3 | 9  | 4.00  | 0.58 |
| 2  | -3 | -9 | 3.20  | 1.03 |
| -2 | 3  | -9 | 3.73  | 0.69 |
| -2 | -3 | 9  | 4.40  | 0.44 |
| -2 | 3  | -9 | 4.52  | 0.89 |
| -2 | 3  | -9 | 4.92  | 0.82 |
| 2  | -3 | -9 | 3.06  | 0.82 |
| 2  | 3  | 9  | 3.85  | 0.57 |
| -2 | 3  | -9 | 3.42  | 1.24 |
| 2  | 3  | 9  | 3.84  | 1.38 |
| -2 | -3 | 9  | 4.25  | 0.47 |
| 3  | 3  | -9 | 1.40  | 0.36 |
| 3  | -3 | 9  | 1.95  | 0.58 |
| 3  | 3  | -9 | 1.78  | 0.51 |
| 3  | 3  | -9 | 1.36  | 0.46 |
| -3 | 3  | 9  | 1.71  | 0.48 |
| -3 | -3 | -9 | 1.48  | 0.96 |
| -3 | -3 | -9 | 1.56  | 0.73 |

## CIF S3

|    |    |    |       |      |
|----|----|----|-------|------|
| -3 | 3  | 9  | 0.82  | 0.71 |
| -3 | -3 | -9 | 0.76  | 0.67 |
| 3  | 3  | 9  | 1.20  | 0.44 |
| 3  | -3 | -9 | 1.46  | 0.98 |
| 3  | -3 | -9 | 2.20  | 0.78 |
| -3 | -3 | 9  | 1.64  | 0.37 |
| -3 | 3  | -9 | 1.74  | 0.57 |
| 3  | -3 | -9 | 1.35  | 0.86 |
| -3 | -3 | 9  | 1.41  | 0.22 |
| -3 | -3 | 9  | 0.94  | 0.38 |
| -3 | 3  | -9 | 1.02  | 0.64 |
| -3 | 3  | -9 | 1.36  | 0.74 |
| -3 | -3 | 9  | 0.92  | 0.22 |
| -4 | 3  | 9  | 12.26 | 1.21 |
| 4  | -3 | 9  | 13.81 | 1.15 |
| -4 | -3 | -9 | 14.39 | 1.23 |
| -4 | 3  | 9  | 14.85 | 1.04 |
| -4 | -3 | -9 | 15.80 | 1.24 |
| -4 | 3  | 9  | 15.49 | 1.23 |
| -4 | 3  | 9  | 15.41 | 0.94 |
| 4  | 3  | -9 | 14.88 | 0.88 |
| 4  | -3 | -9 | 14.14 | 1.27 |
| -4 | 3  | -9 | 15.99 | 1.41 |
| -4 | -3 | 9  | 14.33 | 0.86 |
| -4 | 3  | -9 | 13.85 | 1.14 |
| -4 | 3  | -9 | 15.46 | 1.30 |
| -4 | -3 | 9  | 14.79 | 1.07 |
| -4 | -3 | 9  | 14.53 | 0.83 |
| 4  | -3 | -9 | 14.56 | 1.18 |
| 4  | -3 | -9 | 13.77 | 1.46 |
| 4  | 3  | 9  | 14.58 | 1.23 |
| -5 | -3 | -9 | 9.42  | 0.98 |
| -5 | -3 | -9 | 11.16 | 0.97 |
| 5  | 3  | -9 | 12.04 | 0.75 |
| -5 | 3  | 9  | 11.37 | 0.95 |
| -5 | 3  | 9  | 11.58 | 0.84 |
| -5 | -3 | -9 | 9.21  | 1.20 |
| -5 | -3 | -9 | 12.88 | 1.23 |
| -5 | -3 | 9  | 11.78 | 0.68 |
| 5  | -3 | -9 | 12.82 | 1.19 |
| -5 | 3  | -9 | 14.51 | 1.55 |

## CIF S3

|    |    |    |       |      |
|----|----|----|-------|------|
| -5 | -3 | 9  | 13.08 | 1.29 |
| -5 | 3  | -9 | 12.68 | 1.26 |
| -5 | -3 | 9  | 12.29 | 1.13 |
| -5 | 3  | -9 | 12.19 | 1.08 |
| 5  | 3  | 9  | 10.62 | 1.11 |
| 5  | -3 | -9 | 10.60 | 1.13 |
| -5 | 3  | -9 | 10.92 | 1.08 |
| 5  | -3 | -9 | 11.97 | 1.38 |
| -6 | -3 | -9 | 2.73  | 0.68 |
| -6 | 3  | 9  | 2.71  | 0.53 |
| -6 | -3 | -9 | 2.68  | 0.68 |
| -6 | 3  | 9  | 2.24  | 0.45 |
| 6  | 3  | 9  | 1.08  | 0.76 |
| -6 | 3  | -9 | 2.84  | 0.66 |
| -6 | 3  | -9 | 2.84  | 0.96 |
| -6 | 3  | -9 | 0.73  | 0.97 |
| -7 | -3 | -9 | 0.42  | 0.56 |
| -7 | -3 | -9 | -0.77 | 0.93 |
| -7 | 3  | 9  | -0.12 | 0.32 |
| -7 | 3  | 9  | 0.26  | 0.19 |
| -7 | -3 | -9 | -0.04 | 0.68 |
| -7 | -3 | -9 | -0.40 | 1.03 |
| -7 | -3 | -9 | 0.50  | 0.56 |
| 7  | -3 | 9  | 0.80  | 0.56 |
| -7 | -3 | -9 | -0.23 | 0.55 |
| -7 | -3 | -9 | 0.35  | 0.54 |
| -7 | 3  | -9 | -0.19 | 0.34 |
| -7 | 3  | -9 | 1.88  | 1.05 |
| -7 | 3  | -9 | 0.53  | 0.57 |
| -7 | 3  | -9 | -0.09 | 0.58 |
| -8 | -3 | -9 | 0.74  | 0.43 |
| -8 | 3  | 9  | 0.74  | 0.27 |
| -8 | -3 | -9 | 1.06  | 0.77 |
| -8 | -3 | -9 | 0.37  | 0.48 |
| -8 | 3  | 9  | 0.51  | 0.25 |
| -8 | -3 | -9 | 0.20  | 0.53 |
| 8  | -3 | 9  | 1.05  | 0.53 |
| -8 | 3  | 9  | 0.24  | 0.25 |
| -8 | -3 | -9 | 0.37  | 0.49 |
| -8 | -3 | -9 | 1.61  | 0.95 |
| -8 | 3  | -9 | 0.41  | 0.47 |

## CIF S3

|    |    |    |       |      |
|----|----|----|-------|------|
| -8 | 3  | -9 | 0.17  | 0.87 |
| -8 | 3  | -9 | 0.56  | 0.48 |
| -8 | 3  | -9 | 0.26  | 0.53 |
| 9  | -3 | 9  | 1.03  | 0.46 |
| -9 | -3 | -9 | 0.71  | 0.34 |
| -9 | -3 | -9 | 1.38  | 0.38 |
| -9 | -3 | -9 | -0.36 | 0.66 |
| -9 | -3 | -9 | 0.68  | 0.38 |
| -9 | 3  | -9 | 1.18  | 0.63 |
| -9 | 3  | -9 | 1.07  | 0.41 |
| -9 | 3  | -9 | 0.81  | 0.40 |
| -9 | 3  | -9 | 0.63  | 0.38 |
| 0  | 4  | -9 | 18.10 | 1.25 |
| 0  | -4 | -9 | 13.60 | 1.34 |
| 0  | -4 | 9  | 17.26 | 1.15 |
| 0  | 4  | 9  | 18.51 | 1.08 |
| 0  | -4 | 9  | 17.11 | 1.11 |
| 0  | -4 | -9 | 12.39 | 1.44 |
| 0  | 4  | -9 | 21.86 | 1.86 |
| 0  | 4  | -9 | 19.79 | 1.41 |
| -1 | 4  | 9  | 9.84  | 0.71 |
| -1 | -4 | -9 | 10.48 | 1.51 |
| 1  | 4  | -9 | 9.18  | 0.97 |
| 1  | 4  | -9 | 9.51  | 0.89 |
| -1 | 4  | 9  | 9.38  | 0.89 |
| -1 | -4 | -9 | 9.74  | 1.17 |
| 1  | -4 | 9  | 8.91  | 0.81 |
| -1 | -4 | 9  | 9.55  | 1.29 |
| 1  | 4  | 9  | 8.91  | 0.76 |
| -1 | 4  | -9 | 8.61  | 0.98 |
| 1  | 4  | 9  | 7.51  | 1.55 |
| 1  | -4 | -9 | 8.90  | 1.32 |
| -1 | 4  | -9 | 10.97 | 1.11 |
| 1  | -4 | -9 | 8.40  | 1.18 |
| -1 | -4 | 9  | 10.16 | 0.85 |
| -1 | 4  | -9 | 9.88  | 1.00 |
| -1 | 4  | -9 | 9.53  | 1.51 |
| 2  | 4  | -9 | 10.17 | 0.96 |
| 2  | -4 | 9  | 9.97  | 0.90 |
| -2 | 4  | 9  | 10.24 | 0.90 |
| -2 | -4 | -9 | 8.31  | 1.46 |

## CIF S3

|    |    |    |       |      |
|----|----|----|-------|------|
| -2 | -4 | -9 | 10.22 | 1.17 |
| 2  | 4  | -9 | 9.82  | 0.87 |
| -2 | 4  | 9  | 10.31 | 0.75 |
| -2 | 4  | -9 | 9.96  | 0.95 |
| -2 | -4 | 9  | 9.73  | 0.71 |
| -2 | -4 | 9  | 10.98 | 0.79 |
| 2  | -4 | -9 | 8.18  | 1.30 |
| 2  | 4  | 9  | 7.14  | 1.61 |
| 2  | -4 | -9 | 9.64  | 1.50 |
| -2 | 4  | -9 | 6.85  | 1.98 |
| -2 | 4  | -9 | 11.86 | 1.15 |
| -2 | 4  | -9 | 10.41 | 1.17 |
| 2  | 4  | 9  | 10.12 | 0.80 |
| -2 | -4 | 9  | 10.17 | 0.64 |
| 2  | -4 | -9 | 11.86 | 1.24 |
| -3 | 4  | 9  | 20.32 | 1.27 |
| -3 | 4  | 9  | 22.01 | 1.60 |
| -3 | -4 | -9 | 20.97 | 1.39 |
| 3  | 4  | -9 | 21.34 | 1.23 |
| 3  | -4 | 9  | 19.86 | 1.37 |
| 3  | 4  | -9 | 21.24 | 1.36 |
| 3  | 4  | -9 | 19.99 | 1.29 |
| -3 | -4 | -9 | 20.46 | 1.55 |
| -3 | 4  | -9 | 20.71 | 1.59 |
| -3 | -4 | 9  | 19.42 | 1.50 |
| -3 | 4  | -9 | 21.51 | 1.37 |
| 3  | -4 | -9 | 20.34 | 1.75 |
| -3 | -4 | 9  | 18.89 | 1.20 |
| -3 | 4  | -9 | 20.81 | 1.56 |
| 3  | 4  | 9  | 21.04 | 1.29 |
| -3 | -4 | 9  | 20.11 | 1.15 |
| -3 | -4 | 9  | 22.91 | 1.06 |
| -3 | -4 | 9  | 21.02 | 1.05 |
| -3 | -4 | 9  | 18.51 | 1.26 |
| 3  | -4 | -9 | 21.39 | 1.63 |
| 4  | -4 | 9  | 12.05 | 1.10 |
| -4 | -4 | -9 | 12.05 | 1.24 |
| -4 | 4  | 9  | 12.52 | 0.91 |
| -4 | -4 | -9 | 13.32 | 0.99 |
| -4 | -4 | -9 | 10.28 | 1.18 |
| 4  | 4  | -9 | 13.56 | 0.84 |



## CIF S3

|    |    |    |       |      |
|----|----|----|-------|------|
| -4 | 4  | 9  | 12.56 | 0.99 |
| -4 | 4  | 9  | 14.43 | 1.30 |
| -4 | -4 | 9  | 12.87 | 0.77 |
| -4 | 4  | -9 | 11.40 | 1.32 |
| 4  | -4 | -9 | 11.93 | 1.40 |
| 4  | 4  | 9  | 12.02 | 1.14 |
| -4 | 4  | -9 | 12.36 | 1.08 |
| -4 | -4 | 9  | 12.70 | 1.00 |
| 4  | -4 | -9 | 13.23 | 1.33 |
| -4 | 4  | -9 | 12.31 | 1.28 |
| -4 | -4 | 9  | 11.79 | 0.80 |
| -5 | -4 | -9 | 5.74  | 1.03 |
| -5 | -4 | -9 | 4.97  | 0.90 |
| -5 | 4  | 9  | 6.21  | 0.84 |
| -5 | 4  | 9  | 5.75  | 0.95 |
| 5  | -4 | 9  | 6.03  | 0.97 |
| -5 | -4 | -9 | 5.95  | 0.94 |
| -5 | -4 | -9 | 5.61  | 1.27 |
| -5 | 4  | 9  | 6.08  | 0.70 |
| 5  | 4  | 9  | 4.98  | 1.06 |
| -5 | -4 | 9  | 6.56  | 0.48 |
| -5 | 4  | -9 | 7.02  | 0.96 |
| -5 | -4 | 9  | 9.85  | 1.17 |
| 5  | -4 | -9 | 4.04  | 1.22 |
| 5  | -4 | -9 | 6.40  | 1.11 |
| -5 | 4  | -9 | 6.20  | 1.24 |
| -5 | 4  | -9 | 6.94  | 1.13 |
| -6 | 4  | 9  | 5.31  | 0.66 |
| -6 | -4 | -9 | 3.34  | 0.89 |
| -6 | -4 | -9 | 3.30  | 0.83 |
| -6 | -4 | -9 | 6.55  | 0.79 |
| -6 | -4 | -9 | 8.32  | 1.26 |
| -6 | 4  | 9  | 1.71  | 0.62 |
| -6 | -4 | 9  | 5.13  | 1.15 |
| -6 | 4  | -9 | 5.00  | 0.99 |
| -6 | 4  | -9 | 5.60  | 0.84 |
| -6 | 4  | -9 | 3.39  | 1.09 |
| -7 | -4 | -9 | 2.73  | 0.55 |
| -7 | -4 | -9 | 2.02  | 0.58 |
| 7  | -4 | 9  | 4.08  | 0.92 |
| -7 | 4  | 9  | 4.18  | 0.67 |

## CIF S3

|    |    |    |       |      |
|----|----|----|-------|------|
| -7 | -4 | -9 | 3.77  | 0.84 |
| -7 | -4 | -9 | 2.53  | 0.61 |
| -7 | 4  | 9  | 3.79  | 0.61 |
| -7 | -4 | -9 | 2.30  | 1.14 |
| -7 | -4 | -9 | 3.59  | 0.82 |
| -7 | 4  | 9  | 3.03  | 0.50 |
| -7 | -4 | -9 | 3.18  | 1.07 |
| -7 | -4 | -9 | 2.08  | 0.91 |
| -7 | 4  | -9 | 5.24  | 1.37 |
| -7 | 4  | -9 | 3.28  | 0.59 |
| -7 | 4  | -9 | 3.70  | 0.85 |
| -7 | 4  | -9 | 4.09  | 0.90 |
| -8 | -4 | -9 | 3.42  | 0.76 |
| 8  | -4 | 9  | 4.18  | 0.84 |
| -8 | -4 | -9 | 4.20  | 0.72 |
| -8 | -4 | -9 | 4.45  | 0.80 |
| -8 | 4  | 9  | 4.62  | 0.46 |
| -8 | -4 | -9 | 4.20  | 0.71 |
| -8 | 4  | 9  | 3.70  | 0.49 |
| -8 | -4 | -9 | 6.00  | 1.11 |
| -8 | -4 | -9 | 2.91  | 0.93 |
| -8 | 4  | -9 | 3.85  | 0.81 |
| -8 | 4  | -9 | 3.38  | 0.86 |
| -8 | 4  | -9 | 3.29  | 0.74 |
| -9 | -4 | -9 | 5.16  | 0.60 |
| 9  | -4 | 9  | 4.54  | 0.75 |
| -9 | -4 | -9 | 4.82  | 0.62 |
| -9 | 4  | -9 | 3.27  | 0.64 |
| -9 | 4  | -9 | 4.66  | 0.66 |
| -9 | 4  | -9 | 1.75  | 0.61 |
| -9 | 4  | -9 | 4.51  | 0.71 |
| 0  | 5  | -9 | 52.27 | 3.44 |
| 0  | -5 | 9  | 52.22 | 2.71 |
| 0  | -5 | -9 | 50.89 | 3.04 |
| 0  | 5  | 9  | 53.36 | 2.72 |
| 0  | -5 | 9  | 48.02 | 2.80 |
| 0  | -5 | 9  | 53.73 | 2.77 |
| 0  | 5  | -9 | 55.31 | 3.02 |
| 0  | 5  | -9 | 50.66 | 2.88 |
| 1  | -5 | 9  | 24.87 | 1.57 |
| -1 | -5 | -9 | 25.41 | 1.83 |

## CIF S3

|    |    |    |       |      |
|----|----|----|-------|------|
| 1  | 5  | -9 | 29.20 | 1.80 |
| -1 | 5  | 9  | 27.21 | 1.51 |
| 1  | 5  | -9 | 29.46 | 1.70 |
| 1  | -5 | -9 | 24.21 | 1.87 |
| -1 | 5  | -9 | 28.14 | 1.76 |
| -1 | 5  | -9 | 27.39 | 1.89 |
| -1 | -5 | 9  | 26.49 | 1.69 |
| -1 | -5 | 9  | 27.29 | 1.58 |
| -1 | 5  | -9 | 27.22 | 1.76 |
| 1  | 5  | 9  | 28.60 | 1.56 |
| 1  | -5 | -9 | 24.51 | 2.07 |
| -2 | 5  | 9  | 1.64  | 0.48 |
| -2 | -5 | -9 | 3.25  | 1.06 |
| 2  | 5  | -9 | 2.62  | 0.69 |
| 2  | 5  | -9 | 1.70  | 0.57 |
| -2 | 5  | 9  | 2.14  | 0.57 |
| 2  | -5 | 9  | 2.37  | 0.69 |
| -2 | -5 | 9  | 1.88  | 0.76 |
| -2 | -5 | 9  | 2.25  | 0.59 |
| -2 | 5  | -9 | 0.87  | 0.71 |
| 2  | -5 | -9 | 3.15  | 1.15 |
| 2  | -5 | -9 | 2.46  | 1.20 |
| 2  | 5  | 9  | 2.15  | 0.53 |
| -2 | 5  | -9 | 3.33  | 0.85 |
| -2 | -5 | 9  | 1.94  | 0.41 |
| -2 | -5 | 9  | 1.96  | 0.42 |
| -2 | -5 | 9  | 2.92  | 0.57 |
| -3 | -5 | -9 | 10.52 | 1.19 |
| 3  | 5  | -9 | 11.17 | 0.91 |
| -3 | -5 | -9 | 11.78 | 1.27 |
| -3 | 5  | 9  | 10.00 | 1.01 |
| -3 | 5  | 9  | 11.10 | 0.92 |
| 3  | 5  | -9 | 10.94 | 1.00 |
| 3  | -5 | 9  | 11.18 | 1.06 |
| 3  | -5 | -9 | 11.10 | 1.48 |
| -3 | 5  | -9 | 10.30 | 1.23 |
| 3  | 5  | 9  | 10.37 | 0.91 |
| -3 | -5 | 9  | 10.80 | 0.75 |
| -3 | -5 | 9  | 11.04 | 0.62 |
| 3  | -5 | -9 | 7.95  | 1.19 |
| -3 | 5  | -9 | 12.38 | 1.28 |

## CIF S3

|    |    |    |       |      |
|----|----|----|-------|------|
| -3 | -5 | 9  | 12.20 | 0.62 |
| -3 | -5 | 9  | 10.26 | 0.88 |
| -3 | 5  | -9 | 10.29 | 1.11 |
| -3 | -5 | 9  | 10.19 | 1.20 |
| -3 | -5 | 9  | 11.33 | 0.77 |
| -3 | -5 | 9  | 10.32 | 0.83 |
| -4 | -5 | -9 | 52.82 | 2.74 |
| -4 | -5 | -9 | 51.09 | 2.81 |
| -4 | -5 | -9 | 48.04 | 2.65 |
| 4  | -5 | 9  | 50.44 | 2.73 |
| 4  | 5  | -9 | 51.31 | 2.57 |
| -4 | 5  | 9  | 44.46 | 2.87 |
| -4 | 5  | 9  | 48.86 | 2.57 |
| -4 | 5  | 9  | 51.44 | 2.63 |
| -4 | 5  | -9 | 47.92 | 2.84 |
| -4 | -5 | 9  | 49.53 | 2.66 |
| -4 | -5 | 9  | 48.69 | 2.69 |
| -4 | -5 | 9  | 44.74 | 2.65 |
| -4 | -5 | 9  | 48.84 | 2.50 |
| -4 | 5  | -9 | 50.40 | 3.01 |
| -4 | 5  | -9 | 52.15 | 2.73 |
| -4 | -5 | 9  | 49.70 | 2.47 |
| 4  | -5 | -9 | 43.75 | 3.07 |
| 4  | -5 | -9 | 44.68 | 2.91 |
| -5 | -5 | -9 | 47.00 | 2.88 |
| -5 | 5  | 9  | 46.26 | 2.88 |
| -5 | 5  | 9  | 52.67 | 2.71 |
| -5 | -5 | -9 | 50.79 | 2.73 |
| -5 | -5 | -9 | 53.32 | 2.71 |
| 5  | -5 | 9  | 55.72 | 2.90 |
| -5 | 5  | 9  | 52.25 | 2.64 |
| -5 | -5 | -9 | 50.15 | 2.81 |
| 5  | 5  | 9  | 44.89 | 2.89 |
| 5  | -5 | -9 | 43.43 | 2.92 |
| -5 | -5 | 9  | 50.63 | 2.75 |
| -5 | 5  | -9 | 51.83 | 3.14 |
| -5 | -5 | 9  | 53.26 | 2.56 |
| -5 | 5  | -9 | 54.55 | 2.85 |
| -5 | 5  | -9 | 52.58 | 2.94 |
| 6  | -5 | 9  | 3.80  | 0.95 |
| -6 | -5 | -9 | 1.55  | 0.79 |

## CIF S3

|    |    |    |       |      |
|----|----|----|-------|------|
| -6 | -5 | -9 | 1.11  | 1.06 |
| -6 | -5 | -9 | 1.89  | 0.56 |
| -6 | -5 | -9 | 3.24  | 1.03 |
| -6 | 5  | 9  | 1.72  | 0.55 |
| -6 | -5 | -9 | 1.65  | 0.71 |
| -6 | 5  | 9  | 2.11  | 0.59 |
| -6 | -5 | -9 | 2.21  | 1.08 |
| -6 | 5  | 9  | 2.36  | 0.63 |
| -6 | 5  | 9  | 1.43  | 0.51 |
| -6 | -5 | -9 | 2.80  | 0.78 |
| -6 | 5  | -9 | 4.78  | 1.42 |
| -6 | 5  | -9 | 1.75  | 0.62 |
| -6 | 5  | -9 | 1.99  | 1.18 |
| -6 | 5  | -9 | 0.03  | 0.66 |
| -6 | 5  | -9 | 1.93  | 0.87 |
| -6 | -5 | 9  | 2.22  | 0.93 |
| -7 | -5 | -9 | 4.21  | 0.88 |
| 7  | -5 | 9  | 3.90  | 0.93 |
| -7 | 5  | 9  | 3.59  | 0.70 |
| -7 | 5  | 9  | 3.86  | 0.72 |
| -7 | -5 | -9 | 5.52  | 0.82 |
| -7 | -5 | -9 | 3.68  | 0.79 |
| -7 | 5  | 9  | 3.45  | 0.76 |
| -7 | -5 | -9 | 5.03  | 1.17 |
| -7 | -5 | -9 | 3.85  | 0.86 |
| -7 | -5 | -9 | 3.08  | 0.79 |
| -7 | -5 | -9 | 3.59  | 1.09 |
| -7 | 5  | 9  | 4.56  | 0.60 |
| -7 | 5  | -9 | 4.18  | 0.88 |
| -7 | 5  | -9 | 4.61  | 1.35 |
| -7 | 5  | -9 | 3.75  | 0.63 |
| -7 | 5  | -9 | 3.30  | 1.03 |
| -7 | 5  | -9 | 4.39  | 0.85 |
| -8 | -5 | -9 | 1.53  | 0.43 |
| -8 | -5 | -9 | 0.88  | 0.47 |
| 8  | -5 | 9  | 1.15  | 0.48 |
| -8 | 5  | 9  | 1.11  | 0.30 |
| -8 | -5 | -9 | 1.15  | 0.50 |
| -8 | -5 | -9 | -0.14 | 0.94 |
| -8 | -5 | -9 | 0.99  | 0.50 |
| -8 | 5  | -9 | 0.52  | 0.50 |

## CIF S3

|    |    |    |       |      |
|----|----|----|-------|------|
| -8 | 5  | -9 | 0.08  | 0.75 |
| -8 | 5  | -9 | 1.87  | 0.55 |
| 9  | -5 | 9  | 0.32  | 0.36 |
| -9 | -5 | -9 | 0.35  | 0.34 |
| -9 | -5 | -9 | 0.09  | 0.31 |
| -9 | -5 | -9 | -0.21 | 0.30 |
| -9 | 5  | -9 | 0.43  | 0.39 |
| 9  | 5  | 9  | 0.18  | 0.36 |
| -9 | 5  | -9 | 0.17  | 0.33 |
| -9 | 5  | -9 | 0.40  | 0.32 |
| 9  | 5  | 9  | 0.12  | 0.33 |
| 0  | 6  | -9 | 12.63 | 1.29 |
| 0  | -6 | 9  | 12.55 | 1.08 |
| 0  | 6  | 9  | 12.91 | 0.98 |
| 0  | 6  | -9 | 11.35 | 1.18 |
| 0  | -6 | 9  | 12.71 | 0.96 |
| 0  | -6 | 9  | 12.35 | 0.99 |
| 0  | -6 | 9  | 12.78 | 1.20 |
| 0  | 6  | -9 | 14.14 | 1.28 |
| 1  | -6 | 9  | 11.69 | 1.40 |
| 1  | 6  | -9 | 11.51 | 1.19 |
| -1 | -6 | -9 | 13.16 | 1.43 |
| 1  | -6 | 9  | 11.46 | 0.99 |
| -1 | 6  | 9  | 12.44 | 0.91 |
| 1  | -6 | 9  | 10.72 | 0.99 |
| 1  | 6  | -9 | 12.42 | 1.08 |
| -1 | -6 | 9  | 13.30 | 0.99 |
| -1 | 6  | -9 | 11.44 | 1.23 |
| -1 | 6  | -9 | 12.60 | 1.24 |
| -1 | 6  | -9 | 11.51 | 1.27 |
| -1 | -6 | 9  | 11.65 | 1.05 |
| 1  | 6  | 9  | 12.03 | 0.93 |
| 1  | -6 | -9 | 7.80  | 1.28 |
| -1 | -6 | 9  | 11.33 | 1.00 |
| -2 | 6  | 9  | 1.47  | 0.54 |
| -2 | -6 | -9 | 1.69  | 1.01 |
| 2  | 6  | -9 | 2.76  | 0.68 |
| 2  | -6 | 9  | 2.06  | 0.68 |
| -2 | 6  | 9  | 2.55  | 0.60 |
| 2  | -6 | 9  | 2.68  | 0.79 |
| 2  | 6  | -9 | 2.97  | 0.83 |

## CIF S3

|    |    |    |       |      |
|----|----|----|-------|------|
| -2 | 6  | 9  | 2.75  | 0.66 |
| -2 | -6 | 9  | 1.70  | 0.67 |
| 2  | -6 | -9 | 2.42  | 1.09 |
| -2 | -6 | 9  | 2.02  | 0.59 |
| -2 | -6 | 9  | 2.78  | 0.80 |
| -2 | -6 | 9  | 2.50  | 0.45 |
| -2 | 6  | -9 | 2.55  | 0.88 |
| -2 | -6 | 9  | 2.74  | 0.58 |
| 2  | 6  | 9  | 2.44  | 0.67 |
| 2  | -6 | -9 | 2.34  | 1.28 |
| -3 | 6  | 9  | 3.69  | 0.69 |
| 3  | 6  | -9 | 3.32  | 0.82 |
| -3 | 6  | 9  | 3.07  | 0.71 |
| -3 | -6 | -9 | 3.39  | 1.05 |
| -3 | -6 | -9 | 0.45  | 0.79 |
| -3 | -6 | -9 | 3.25  | 0.97 |
| 3  | -6 | 9  | 3.28  | 0.78 |
| 3  | 6  | -9 | 2.68  | 0.73 |
| 3  | -6 | 9  | 4.46  | 0.92 |
| -3 | -6 | 9  | 3.47  | 0.59 |
| -3 | -6 | 9  | 3.03  | 0.36 |
| -3 | 6  | -9 | 2.88  | 0.85 |
| -3 | -6 | 9  | 3.52  | 0.66 |
| 3  | -6 | -9 | 1.98  | 1.29 |
| -3 | -6 | 9  | 3.24  | 0.82 |
| -3 | -6 | 9  | 3.11  | 0.35 |
| -3 | 6  | -9 | 2.45  | 0.87 |
| 3  | -6 | -9 | 2.98  | 1.26 |
| -3 | 6  | -9 | 2.69  | 0.91 |
| -3 | -6 | 9  | 2.72  | 0.56 |
| 3  | 6  | 9  | 3.30  | 0.69 |
| -3 | -6 | 9  | 3.08  | 0.47 |
| -4 | -6 | -9 | 51.12 | 2.71 |
| -4 | -6 | -9 | 50.51 | 2.91 |
| -4 | -6 | -9 | 52.88 | 2.83 |
| 4  | -6 | 9  | 53.01 | 2.84 |
| -4 | 6  | 9  | 50.23 | 2.74 |
| -4 | 6  | 9  | 50.18 | 2.66 |
| 4  | -6 | -9 | 42.54 | 3.02 |
| -4 | 6  | -9 | 50.01 | 2.82 |
| -4 | -6 | 9  | 47.40 | 2.76 |

## CIF S3

|    |    |    |       |      |
|----|----|----|-------|------|
| -4 | -6 | 9  | 51.42 | 2.76 |
| -4 | 6  | -9 | 54.48 | 2.98 |
| -4 | -6 | 9  | 51.96 | 2.59 |
| -4 | -6 | 9  | 46.32 | 2.58 |
| -4 | 6  | -9 | 56.03 | 3.12 |
| -5 | 6  | 9  | 17.54 | 1.26 |
| -5 | -6 | -9 | 14.34 | 1.21 |
| -5 | 6  | 9  | 16.10 | 1.14 |
| -5 | -6 | -9 | 16.14 | 1.51 |
| 5  | -6 | 9  | 17.19 | 1.43 |
| -5 | -6 | -9 | 16.86 | 1.51 |
| -5 | -6 | -9 | 13.77 | 1.25 |
| -5 | -6 | 9  | 14.58 | 1.42 |
| -5 | 6  | -9 | 17.44 | 1.48 |
| -5 | -6 | 9  | 17.17 | 1.46 |
| -5 | 6  | -9 | 14.24 | 1.30 |
| -6 | -6 | -9 | 8.58  | 1.28 |
| -6 | -6 | -9 | 4.63  | 0.85 |
| -6 | 6  | 9  | 6.17  | 0.94 |
| -6 | 6  | 9  | 7.08  | 0.91 |
| -6 | -6 | -9 | 7.34  | 0.94 |
| 6  | -6 | 9  | 6.97  | 0.98 |
| -6 | -6 | -9 | 5.12  | 1.03 |
| -6 | 6  | 9  | 5.82  | 0.90 |
| -6 | -6 | -9 | 5.74  | 1.28 |
| -6 | -6 | -9 | 5.68  | 0.98 |
| -6 | -6 | -9 | 6.98  | 1.37 |
| -6 | -6 | 9  | 5.73  | 1.24 |
| -6 | 6  | -9 | 5.43  | 0.87 |
| -6 | 6  | -9 | 9.06  | 1.65 |
| -6 | 6  | -9 | 6.64  | 1.45 |
| -6 | 6  | -9 | 10.29 | 1.40 |
| -7 | -6 | -9 | -0.05 | 0.35 |
| -7 | -6 | -9 | 0.89  | 1.02 |
| -7 | -6 | -9 | 0.69  | 0.58 |
| -7 | 6  | 9  | 0.23  | 0.42 |
| -7 | -6 | -9 | -0.07 | 0.59 |
| -7 | -6 | -9 | -0.40 | 0.99 |
| -7 | 6  | 9  | -0.17 | 0.36 |
| -7 | 6  | 9  | -0.15 | 0.49 |
| -7 | 6  | 9  | -0.40 | 0.47 |



## CIF S3

|    |    |    |       |      |
|----|----|----|-------|------|
| -7 | -6 | -9 | 0.17  | 0.55 |
| 7  | -6 | 9  | -0.16 | 0.50 |
| -7 | -6 | -9 | -0.89 | 0.46 |
| -7 | -6 | 9  | -1.13 | 0.82 |
| -7 | 6  | -9 | 0.15  | 0.37 |
| -7 | 6  | -9 | 0.59  | 0.60 |
| -7 | 6  | -9 | 0.74  | 0.97 |
| -7 | 6  | -9 | 0.60  | 0.94 |
| -7 | 6  | -9 | 0.40  | 0.59 |
| -8 | -6 | -9 | 6.46  | 0.72 |
| -8 | -6 | -9 | 5.48  | 0.74 |
| 8  | -6 | 9  | 4.73  | 0.68 |
| -8 | -6 | -9 | 6.72  | 1.11 |
| -8 | -6 | -9 | 5.96  | 0.76 |
| -8 | 6  | 9  | 6.18  | 0.56 |
| -8 | 6  | 9  | 4.82  | 0.73 |
| -8 | 6  | -9 | 6.05  | 0.80 |
| 8  | 6  | 9  | 6.12  | 0.70 |
| -8 | 6  | -9 | 7.25  | 0.79 |
| -9 | -6 | -9 | -0.09 | 0.32 |
| -9 | 6  | 9  | -0.05 | 0.14 |
| -9 | -6 | -9 | 0.33  | 0.24 |
| 9  | -6 | 9  | 0.14  | 0.28 |
| -9 | 6  | -9 | 0.52  | 0.33 |
| -9 | 6  | -9 | -0.04 | 0.31 |
| 9  | 6  | 9  | 0.11  | 0.35 |
| 9  | 6  | 9  | 0.25  | 0.34 |
| 0  | -7 | 9  | 1.08  | 0.67 |
| 0  | -7 | 9  | 0.37  | 0.71 |
| 0  | 7  | -9 | 1.05  | 0.88 |
| 0  | 7  | 9  | 0.67  | 0.58 |
| 0  | 7  | -9 | 0.16  | 0.77 |
| 0  | -7 | 9  | 1.22  | 0.64 |
| 0  | 7  | -9 | 0.91  | 0.76 |
| 0  | -7 | 9  | 0.18  | 0.76 |
| 0  | -7 | 9  | 0.67  | 0.64 |
| 1  | 7  | -9 | 34.04 | 2.21 |
| -1 | 7  | 9  | 33.52 | 1.86 |
| 1  | 7  | -9 | 31.05 | 2.03 |
| -1 | 7  | 9  | 31.87 | 1.92 |
| 1  | -7 | 9  | 32.16 | 1.86 |

## CIF S3

|    |    |    |       |      |
|----|----|----|-------|------|
| 1  | -7 | 9  | 34.15 | 1.95 |
| 1  | -7 | 9  | 33.75 | 1.91 |
| -1 | -7 | -9 | 35.65 | 2.27 |
| 1  | -7 | 9  | 33.70 | 2.14 |
| -1 | -7 | 9  | 37.22 | 1.93 |
| -1 | 7  | -9 | 32.53 | 2.14 |
| -1 | -7 | 9  | 33.28 | 1.92 |
| -1 | -7 | 9  | 30.61 | 1.82 |
| 1  | 7  | 9  | 33.55 | 1.92 |
| 1  | -7 | -9 | 27.28 | 2.30 |
| -1 | 7  | -9 | 32.58 | 2.15 |
| -1 | -7 | 9  | 32.00 | 1.86 |
| 2  | 7  | -9 | 4.13  | 1.01 |
| -2 | 7  | 9  | 5.16  | 0.82 |
| 2  | -7 | 9  | 4.58  | 1.00 |
| 2  | 7  | -9 | 3.77  | 0.84 |
| 2  | -7 | 9  | 4.33  | 0.98 |
| 2  | -7 | 9  | 5.46  | 1.08 |
| 2  | -7 | 9  | 2.87  | 0.83 |
| -2 | -7 | -9 | 4.78  | 1.34 |
| -2 | 7  | 9  | 4.10  | 0.76 |
| -2 | -7 | 9  | 3.22  | 0.74 |
| -2 | -7 | 9  | 4.80  | 1.21 |
| 2  | 7  | 9  | 4.00  | 0.82 |
| -2 | -7 | 9  | 3.87  | 0.89 |
| 2  | -7 | -9 | 2.37  | 1.27 |
| -2 | -7 | 9  | 3.88  | 0.82 |
| -2 | -7 | 9  | 3.99  | 0.54 |
| -2 | -7 | 9  | 3.66  | 0.71 |
| -2 | -7 | 9  | 3.79  | 0.65 |
| -2 | 7  | -9 | 4.65  | 1.09 |
| 3  | 7  | -9 | 11.59 | 1.21 |
| -3 | 7  | 9  | 11.03 | 1.10 |
| 3  | -7 | 9  | 12.53 | 1.19 |
| 3  | 7  | -9 | 11.01 | 1.09 |
| -3 | 7  | 9  | 10.46 | 1.20 |
| -3 | -7 | -9 | 8.63  | 1.29 |
| 3  | -7 | 9  | 13.25 | 1.21 |
| -3 | -7 | -9 | 12.93 | 1.47 |
| 3  | -7 | 9  | 12.45 | 1.44 |
| -3 | -7 | -9 | 11.80 | 1.16 |

## CIF S3

|    |    |    |       |      |
|----|----|----|-------|------|
| -3 | -7 | 9  | 14.14 | 0.96 |
| 3  | -7 | -9 | 9.29  | 1.55 |
| -3 | 7  | -9 | 12.41 | 1.31 |
| -3 | -7 | 9  | 12.87 | 1.38 |
| -3 | -7 | 9  | 12.73 | 0.98 |
| -3 | 7  | -9 | 11.45 | 1.36 |
| -3 | -7 | 9  | 12.96 | 0.73 |
| -3 | -7 | 9  | 14.04 | 0.93 |
| -3 | 7  | -9 | 11.56 | 1.39 |
| 3  | -7 | -9 | 7.54  | 1.68 |
| -3 | -7 | 9  | 13.08 | 1.00 |
| -3 | -7 | 9  | 12.66 | 0.76 |
| -4 | 7  | 9  | 27.87 | 1.66 |
| -4 | -7 | -9 | 27.07 | 1.70 |
| 4  | -7 | 9  | 30.24 | 1.90 |
| -4 | 7  | 9  | 27.60 | 1.78 |
| -4 | -7 | -9 | 26.34 | 1.80 |
| 4  | -7 | 9  | 24.10 | 1.69 |
| -4 | -7 | -9 | 31.40 | 2.02 |
| -4 | 7  | -9 | 29.93 | 2.00 |
| -4 | 7  | -9 | 28.09 | 2.17 |
| -4 | -7 | 9  | 28.34 | 1.78 |
| -4 | -7 | 9  | 27.39 | 1.58 |
| -4 | 7  | -9 | 24.88 | 1.79 |
| -4 | -7 | 9  | 27.79 | 1.81 |
| -4 | -7 | 9  | 28.81 | 1.54 |
| 4  | -7 | -9 | 25.19 | 2.08 |
| -5 | 7  | 9  | 4.47  | 1.14 |
| 5  | -7 | 9  | 4.84  | 1.00 |
| -5 | -7 | -9 | 4.42  | 1.03 |
| -5 | 7  | 9  | 3.66  | 0.94 |
| -5 | -7 | -9 | 2.94  | 1.05 |
| -5 | 7  | 9  | 4.64  | 1.05 |
| -5 | 7  | 9  | 4.93  | 0.99 |
| -5 | -7 | -9 | 3.23  | 0.71 |
| -5 | -7 | -9 | 3.81  | 0.69 |
| -5 | -7 | -9 | 4.98  | 1.23 |
| 5  | -7 | 9  | 3.89  | 0.78 |
| -5 | -7 | -9 | 4.83  | 0.93 |
| -5 | 7  | 9  | 3.38  | 0.68 |
| -5 | 7  | 9  | 3.25  | 0.88 |

## CIF S3

|    |    |    |       |      |
|----|----|----|-------|------|
| -5 | 7  | 9  | 5.30  | 0.99 |
| -5 | -7 | 9  | 3.61  | 0.50 |
| 5  | 7  | 9  | 4.22  | 0.78 |
| -5 | -7 | 9  | 3.87  | 0.54 |
| -5 | -7 | 9  | 4.97  | 1.14 |
| -5 | 7  | -9 | 3.31  | 0.95 |
| -5 | 7  | -9 | 4.00  | 0.97 |
| -5 | 7  | -9 | 2.97  | 0.82 |
| -5 | -7 | 9  | 6.07  | 1.24 |
| -6 | -7 | -9 | 1.52  | 0.57 |
| -6 | -7 | -9 | 2.58  | 0.63 |
| -6 | 7  | 9  | 1.78  | 0.54 |
| -6 | -7 | -9 | 0.65  | 0.67 |
| -6 | -7 | -9 | -0.51 | 0.91 |
| -6 | 7  | 9  | 1.70  | 0.56 |
| 6  | -7 | 9  | 1.61  | 0.50 |
| -6 | -7 | -9 | 1.71  | 0.97 |
| -6 | 7  | 9  | 2.04  | 0.62 |
| -6 | 7  | 9  | 0.58  | 0.67 |
| -6 | -7 | -9 | 1.88  | 1.09 |
| -6 | -7 | -9 | 1.10  | 0.70 |
| -6 | 7  | 9  | 1.28  | 0.57 |
| 6  | 7  | 9  | 1.05  | 0.49 |
| -6 | -7 | 9  | 1.42  | 0.23 |
| -6 | -7 | 9  | 1.61  | 0.22 |
| -6 | 7  | -9 | 2.15  | 1.07 |
| -6 | -7 | 9  | 2.03  | 0.88 |
| -7 | 7  | 9  | 0.91  | 0.38 |
| -7 | -7 | -9 | 0.44  | 0.52 |
| -7 | 7  | 9  | 0.47  | 0.48 |
| -7 | -7 | -9 | 0.41  | 0.57 |
| -7 | 7  | 9  | 0.21  | 0.42 |
| 7  | -7 | 9  | 0.35  | 0.42 |
| -7 | -7 | -9 | 0.74  | 0.54 |
| -7 | -7 | -9 | 0.57  | 0.87 |
| -7 | 7  | 9  | 0.63  | 0.51 |
| -7 | -7 | -9 | 0.25  | 0.54 |
| -7 | -7 | -9 | 1.15  | 0.91 |
| -7 | 7  | -9 | 0.26  | 0.94 |
| -7 | -7 | 9  | 0.84  | 0.82 |
| -7 | 7  | -9 | 0.58  | 0.56 |

## CIF S3

|    |    |    |       |      |
|----|----|----|-------|------|
| -7 | 7  | -9 | 0.97  | 0.58 |
| -7 | 7  | -9 | 0.62  | 0.31 |
| 7  | 7  | 9  | 0.73  | 0.43 |
| -8 | -7 | -9 | 0.16  | 0.37 |
| -8 | 7  | 9  | 0.06  | 0.29 |
| -8 | 7  | 9  | 0.37  | 0.29 |
| -8 | 7  | 9  | 0.07  | 0.50 |
| 8  | -7 | 9  | 0.40  | 0.33 |
| -8 | -7 | -9 | 1.02  | 0.36 |
| 8  | 7  | 9  | 0.51  | 0.40 |
| 8  | 7  | 9  | 0.14  | 0.34 |
| -8 | 7  | -9 | 0.39  | 0.47 |
| 0  | 8  | -9 | 39.18 | 2.64 |
| 0  | 8  | -9 | 40.65 | 2.49 |
| 0  | -8 | 9  | 38.59 | 2.22 |
| 0  | 8  | 9  | 40.46 | 2.27 |
| 0  | -8 | 9  | 38.46 | 2.35 |
| 0  | -8 | 9  | 37.45 | 2.20 |
| 0  | -8 | 9  | 43.05 | 2.33 |
| 0  | 8  | -9 | 39.32 | 2.51 |
| 1  | 8  | -9 | 3.68  | 1.00 |
| 1  | 8  | -9 | 5.25  | 1.17 |
| 1  | -8 | 9  | 3.63  | 0.89 |
| 1  | -8 | 9  | 5.92  | 0.93 |
| -1 | 8  | 9  | 4.41  | 0.82 |
| 1  | -8 | 9  | 4.32  | 0.97 |
| 1  | -8 | 9  | 5.38  | 0.91 |
| -1 | 8  | 9  | 4.13  | 0.85 |
| 1  | 8  | 9  | 4.56  | 0.81 |
| -1 | -8 | 9  | 3.23  | 0.87 |
| -1 | -8 | 9  | 4.17  | 1.05 |
| -1 | -8 | 9  | 4.27  | 0.92 |
| -1 | 8  | -9 | 4.70  | 1.10 |
| -1 | 8  | -9 | 5.43  | 1.17 |
| -1 | -8 | 9  | 5.16  | 1.01 |
| -1 | -8 | 9  | 5.58  | 1.00 |
| 2  | -8 | 9  | 7.53  | 1.24 |
| -2 | 8  | 9  | 6.76  | 0.92 |
| 2  | 8  | -9 | 6.94  | 1.03 |
| 2  | -8 | 9  | 8.14  | 1.15 |
| -2 | 8  | 9  | 6.47  | 0.93 |

## CIF S3

|    |    |    |       |      |
|----|----|----|-------|------|
| 2  | -8 | 9  | 6.40  | 1.00 |
| 2  | -8 | 9  | 6.69  | 0.95 |
| -2 | -8 | 9  | 6.49  | 1.04 |
| -2 | -8 | 9  | 8.08  | 0.66 |
| -2 | 8  | -9 | 5.45  | 1.37 |
| 2  | 8  | 9  | 6.48  | 0.88 |
| -2 | -8 | 9  | 4.57  | 1.04 |
| -2 | -8 | 9  | 8.30  | 0.95 |
| -2 | -8 | 9  | 6.46  | 0.79 |
| -2 | -8 | 9  | 8.45  | 1.20 |
| -2 | -8 | 9  | 7.18  | 0.94 |
| 2  | -8 | -9 | 5.76  | 1.45 |
| -3 | 8  | 9  | 6.17  | 0.98 |
| -3 | -8 | -9 | 5.80  | 1.32 |
| 3  | -8 | 9  | 7.32  | 0.97 |
| -3 | -8 | -9 | 6.88  | 1.13 |
| 3  | 8  | -9 | 3.83  | 0.93 |
| 3  | -8 | 9  | 5.99  | 1.07 |
| 3  | -8 | 9  | 6.21  | 1.49 |
| -3 | -8 | 9  | 6.57  | 0.50 |
| -3 | -8 | 9  | 6.29  | 1.17 |
| -3 | 8  | -9 | 3.94  | 1.22 |
| 3  | -8 | -9 | 5.68  | 1.43 |
| -3 | -8 | 9  | 7.03  | 0.55 |
| -3 | -8 | 9  | 7.13  | 0.88 |
| -3 | 8  | -9 | 6.03  | 1.05 |
| 4  | -8 | 9  | 0.50  | 0.83 |
| -4 | 8  | 9  | -0.36 | 0.79 |
| -4 | -8 | -9 | 1.60  | 0.99 |
| -4 | -8 | -9 | 0.87  | 0.56 |
| -4 | 8  | 9  | 0.27  | 0.65 |
| -4 | -8 | -9 | 0.69  | 0.73 |
| -4 | -8 | -9 | -0.30 | 0.90 |
| -4 | 8  | 9  | 0.72  | 0.84 |
| -4 | -8 | -9 | 1.05  | 0.80 |
| -4 | 8  | 9  | -0.01 | 0.67 |
| 4  | -8 | 9  | 0.98  | 0.82 |
| -4 | 8  | 9  | -0.27 | 0.67 |
| -4 | 8  | 9  | 0.56  | 0.67 |
| -4 | 8  | 9  | -0.46 | 0.69 |
| 4  | -8 | 9  | 0.33  | 0.93 |

## CIF S3

|    |    |    |       |      |
|----|----|----|-------|------|
| -4 | -8 | 9  | 1.04  | 0.38 |
| -4 | -8 | 9  | 1.12  | 0.54 |
| 4  | 8  | 9  | -0.34 | 0.48 |
| 4  | 8  | 9  | 0.49  | 0.57 |
| -4 | 8  | -9 | 0.25  | 0.81 |
| -4 | -8 | 9  | 0.43  | 0.76 |
| -4 | -8 | 9  | 0.08  | 0.38 |
| -4 | -8 | 9  | 0.05  | 0.98 |
| -4 | -8 | 9  | 0.46  | 0.49 |
| -4 | 8  | -9 | -0.15 | 0.87 |
| -5 | -8 | -9 | 9.46  | 1.05 |
| -5 | 8  | 9  | 8.68  | 0.96 |
| -5 | 8  | 9  | 10.56 | 1.15 |
| -5 | -8 | -9 | 9.76  | 1.47 |
| -5 | -8 | -9 | 9.87  | 1.12 |
| -5 | 8  | 9  | 9.00  | 1.09 |
| -5 | 8  | 9  | 8.94  | 0.98 |
| -5 | 8  | 9  | 8.78  | 1.11 |
| -5 | -8 | -9 | 8.85  | 1.24 |
| -5 | -8 | -9 | 9.29  | 1.13 |
| -5 | 8  | 9  | 9.98  | 1.21 |
| -5 | 8  | 9  | 8.59  | 0.99 |
| -5 | -8 | 9  | 8.86  | 0.68 |
| -5 | -8 | 9  | 8.51  | 1.18 |
| -5 | -8 | 9  | 10.28 | 0.74 |
| -5 | -8 | 9  | 9.31  | 1.23 |
| 5  | 8  | 9  | 8.25  | 0.88 |
| 5  | 8  | 9  | 8.74  | 1.10 |
| -6 | -8 | -9 | 1.61  | 0.85 |
| -6 | -8 | -9 | 4.52  | 0.79 |
| -6 | -8 | -9 | 5.98  | 1.14 |
| -6 | -8 | -9 | 5.23  | 0.86 |
| -6 | 8  | 9  | 4.27  | 0.93 |
| -6 | 8  | 9  | 4.06  | 0.83 |
| -6 | 8  | 9  | 5.04  | 0.88 |
| -6 | -8 | -9 | 3.80  | 0.89 |
| -6 | 8  | 9  | 4.97  | 0.79 |
| -6 | 8  | 9  | 3.47  | 0.86 |
| -6 | -8 | -9 | 5.60  | 1.15 |
| -6 | -8 | -9 | 3.84  | 1.05 |
| -6 | -8 | 9  | 4.15  | 0.85 |

## CIF S3

|    |    |    |       |      |
|----|----|----|-------|------|
| 6  | 8  | 9  | 5.56  | 0.92 |
| -6 | -8 | 9  | 4.82  | 0.33 |
| -6 | -8 | 9  | 5.28  | 0.97 |
| 6  | 8  | 9  | 5.27  | 0.73 |
| -6 | 8  | -9 | 6.08  | 1.45 |
| -6 | -8 | 9  | 4.97  | 0.32 |
| -6 | 8  | -9 | 2.51  | 0.66 |
| -7 | 8  | 9  | 1.34  | 0.47 |
| -7 | 8  | 9  | 1.41  | 0.44 |
| -7 | 8  | 9  | 1.05  | 0.38 |
| -7 | -8 | -9 | 1.36  | 0.53 |
| -7 | -8 | -9 | 1.06  | 0.51 |
| -7 | -8 | -9 | 1.36  | 0.52 |
| -7 | 8  | 9  | 1.13  | 0.37 |
| -7 | -8 | 9  | 1.07  | 0.75 |
| -7 | 8  | -9 | 1.12  | 0.88 |
| -7 | 8  | -9 | 2.23  | 0.57 |
| 7  | 8  | 9  | 1.68  | 0.42 |
| 7  | 8  | 9  | 0.91  | 0.47 |
| -7 | 8  | -9 | 1.78  | 0.63 |
| -8 | -8 | -9 | 2.97  | 0.48 |
| -8 | 8  | 9  | 2.48  | 0.47 |
| -8 | 8  | 9  | 2.33  | 0.44 |
| -8 | -8 | -9 | 3.39  | 0.55 |
| -8 | -8 | -9 | 2.88  | 0.74 |
| -8 | 8  | 9  | 3.20  | 0.38 |
| 8  | 8  | 9  | 2.75  | 0.60 |
| -8 | 8  | -9 | 2.10  | 0.59 |
| 8  | 8  | 9  | 2.89  | 0.65 |
| 0  | -9 | 9  | 17.98 | 1.27 |
| 0  | -9 | 9  | 20.35 | 1.46 |
| 0  | -9 | 9  | 16.90 | 1.43 |
| 0  | 9  | 9  | 17.09 | 1.41 |
| 0  | -9 | 9  | 17.82 | 1.37 |
| 0  | 9  | -9 | 15.51 | 1.60 |
| 0  | -9 | 9  | 19.78 | 1.35 |
| 0  | 9  | -9 | 18.81 | 1.67 |
| 1  | 9  | -9 | 49.84 | 3.86 |
| 1  | -9 | 9  | 57.43 | 3.10 |
| 1  | -9 | 9  | 62.74 | 3.19 |
| 1  | -9 | 9  | 64.95 | 3.20 |



## CIF S3

|    |    |    |       |      |
|----|----|----|-------|------|
| -1 | 9  | 9  | 52.25 | 3.16 |
| -1 | 9  | 9  | 57.86 | 3.11 |
| 1  | -9 | 9  | 60.65 | 3.21 |
| -1 | -9 | 9  | 55.71 | 2.98 |
| -1 | -9 | 9  | 60.29 | 3.11 |
| -1 | -9 | 9  | 58.18 | 3.08 |
| -1 | -9 | 9  | 60.21 | 3.14 |
| -1 | -9 | 9  | 63.11 | 3.23 |
| 2  | -9 | 9  | 9.01  | 1.14 |
| -2 | -9 | -9 | 10.76 | 1.24 |
| 2  | -9 | 9  | 11.33 | 1.15 |
| 2  | -9 | 9  | 11.34 | 1.31 |
| -2 | 9  | 9  | 9.75  | 1.14 |
| -2 | 9  | 9  | 8.94  | 1.02 |
| 2  | -9 | 9  | 9.13  | 1.10 |
| -2 | -9 | 9  | 10.59 | 1.11 |
| 2  | 9  | 9  | 9.30  | 1.04 |
| -2 | -9 | 9  | 10.32 | 1.14 |
| -2 | -9 | 9  | 9.76  | 0.78 |
| -2 | -9 | 9  | 10.89 | 1.27 |
| -2 | -9 | 9  | 10.48 | 0.91 |
| -2 | -9 | 9  | 11.19 | 0.97 |
| -3 | 9  | 9  | 2.60  | 0.94 |
| 3  | -9 | 9  | 2.95  | 1.29 |
| 3  | -9 | 9  | 0.88  | 0.89 |
| -3 | 9  | 9  | 4.33  | 1.05 |
| 3  | -9 | 9  | 3.43  | 0.96 |
| -3 | -9 | -9 | 4.15  | 0.93 |
| -3 | 9  | 9  | 3.99  | 0.96 |
| 3  | -9 | 9  | 3.67  | 1.01 |
| -3 | 9  | 9  | 3.06  | 0.69 |
| 3  | -9 | 9  | 5.01  | 1.14 |
| -3 | -9 | -9 | 5.10  | 1.37 |
| 3  | -9 | 9  | 4.16  | 0.98 |
| -3 | 9  | 9  | 2.72  | 0.58 |
| -3 | -9 | 9  | 3.15  | 0.80 |
| 3  | 9  | 9  | 3.35  | 0.80 |
| -3 | -9 | 9  | 3.44  | 0.80 |
| -3 | -9 | 9  | 4.32  | 1.16 |
| -3 | 9  | -9 | 4.01  | 0.97 |
| -3 | -9 | 9  | 1.87  | 1.00 |

## CIF S3

|    |    |    |       |      |
|----|----|----|-------|------|
| -3 | -9 | 9  | 2.76  | 0.70 |
| -3 | -9 | 9  | 3.18  | 0.81 |
| 4  | -9 | 9  | 1.46  | 0.89 |
| -4 | 9  | 9  | 1.70  | 0.90 |
| -4 | 9  | 9  | 1.44  | 0.69 |
| -4 | -9 | -9 | -0.68 | 1.43 |
| -4 | -9 | -9 | -0.64 | 0.98 |
| -4 | 9  | 9  | 2.03  | 0.67 |
| -4 | 9  | 9  | 0.98  | 0.72 |
| 4  | -9 | 9  | 1.66  | 0.87 |
| -4 | -9 | -9 | 2.19  | 0.71 |
| -4 | -9 | -9 | 1.04  | 0.81 |
| -4 | -9 | -9 | 2.53  | 1.20 |
| -4 | -9 | -9 | 1.65  | 0.49 |
| -4 | 9  | 9  | 2.60  | 0.73 |
| -4 | -9 | 9  | 3.46  | 0.63 |
| 4  | 9  | 9  | 1.75  | 0.55 |
| -4 | -9 | 9  | 0.87  | 0.53 |
| -4 | -9 | 9  | 2.16  | 1.27 |
| -4 | -9 | 9  | 3.01  | 1.04 |
| -4 | -9 | 9  | 1.69  | 0.40 |
| -4 | -9 | 9  | 2.95  | 0.72 |
| -5 | 9  | 9  | 3.72  | 0.81 |
| -5 | -9 | -9 | 1.92  | 0.82 |
| -5 | 9  | 9  | 3.35  | 0.89 |
| -5 | 9  | 9  | 1.24  | 0.62 |
| -5 | -9 | -9 | 1.99  | 0.67 |
| -5 | 9  | 9  | 3.68  | 1.09 |
| -5 | 9  | 9  | 4.22  | 0.85 |
| -5 | -9 | -9 | 3.74  | 0.99 |
| -5 | 9  | 9  | 4.32  | 0.98 |
| -5 | -9 | -9 | 1.89  | 0.98 |
| -5 | -9 | -9 | 3.34  | 1.35 |
| -5 | -9 | -9 | 2.02  | 0.70 |
| -5 | -9 | 9  | 2.28  | 0.54 |
| -5 | -9 | 9  | 2.62  | 0.78 |
| -5 | -9 | 9  | 3.37  | 0.54 |
| -5 | -9 | 9  | 2.80  | 0.94 |
| 5  | 9  | 9  | 2.62  | 0.54 |
| -6 | -9 | -9 | 11.66 | 1.07 |
| -6 | 9  | 9  | 11.23 | 0.87 |

## CIF S3

|    |     |    |       |      |
|----|-----|----|-------|------|
| -6 | -9  | -9 | 13.73 | 1.50 |
| -6 | -9  | -9 | 8.40  | 0.99 |
| -6 | 9   | 9  | 10.52 | 0.97 |
| -6 | -9  | -9 | 11.24 | 0.93 |
| -6 | -9  | -9 | 12.88 | 1.40 |
| -6 | 9   | 9  | 10.52 | 1.01 |
| -6 | -9  | -9 | 9.81  | 1.05 |
| -6 | -9  | -9 | 10.55 | 0.68 |
| -6 | 9   | 9  | 12.49 | 0.93 |
| -6 | 9   | 9  | 11.42 | 1.00 |
| -6 | 9   | 9  | 8.78  | 0.84 |
| -6 | 9   | -9 | 12.07 | 1.52 |
| 6  | 9   | 9  | 12.32 | 0.90 |
| -6 | 9   | -9 | 11.49 | 0.90 |
| -6 | -9  | 9  | 9.55  | 1.11 |
| -6 | -9  | 9  | 8.92  | 0.55 |
| -6 | -9  | 9  | 10.19 | 0.55 |
| -7 | 9   | 9  | 1.51  | 0.35 |
| -7 | 9   | 9  | 3.26  | 0.57 |
| -7 | 9   | 9  | 2.23  | 0.45 |
| -7 | -9  | -9 | 2.15  | 0.49 |
| -7 | -9  | -9 | 3.09  | 0.63 |
| -7 | -9  | -9 | 2.80  | 0.92 |
| -7 | 9   | 9  | 1.42  | 0.46 |
| -7 | -9  | -9 | 1.58  | 0.45 |
| -7 | 9   | 9  | 3.22  | 0.56 |
| -7 | 9   | -9 | 1.85  | 0.68 |
| -7 | 9   | -9 | 2.53  | 0.65 |
| 7  | 9   | 9  | 2.22  | 0.53 |
| 0  | -10 | 9  | 38.79 | 2.24 |
| 0  | -10 | -9 | 36.73 | 2.21 |
| 0  | 10  | 9  | 36.16 | 2.08 |
| 0  | 10  | 9  | 39.37 | 2.25 |
| 0  | -10 | 9  | 36.16 | 2.12 |
| 0  | -10 | -9 | 37.72 | 2.27 |
| 0  | -10 | 9  | 36.75 | 2.12 |
| 0  | -10 | 9  | 37.80 | 2.13 |
| 0  | -10 | 9  | 38.59 | 2.07 |
| 0  | -10 | 9  | 34.44 | 2.21 |
| 0  | -10 | 9  | 35.27 | 2.21 |
| 0  | -10 | 9  | 37.26 | 2.13 |

## CIF S3

|    |     |    |      |      |
|----|-----|----|------|------|
| -1 | -10 | -9 | 1.90 | 0.96 |
| 1  | -10 | 9  | 3.53 | 0.97 |
| 1  | -10 | 9  | 2.23 | 0.86 |
| 1  | -10 | 9  | 2.71 | 0.73 |
| 1  | -10 | 9  | 2.88 | 0.82 |
| -1 | 10  | 9  | 3.32 | 0.96 |
| -1 | 10  | 9  | 3.74 | 1.01 |
| -1 | 10  | 9  | 3.78 | 0.98 |
| 1  | -10 | 9  | 2.88 | 1.04 |
| 1  | -10 | 9  | 2.16 | 0.84 |
| 1  | -10 | 9  | 2.62 | 0.91 |
| -1 | -10 | -9 | 3.69 | 0.85 |
| -1 | -10 | 9  | 4.30 | 1.05 |
| -1 | -10 | 9  | 3.65 | 0.72 |
| -1 | -10 | 9  | 1.91 | 0.68 |
| -1 | -10 | 9  | 2.28 | 0.84 |
| -1 | -10 | 9  | 1.32 | 0.68 |
| 1  | -10 | -9 | 2.40 | 0.81 |
| 1  | 10  | 9  | 3.43 | 0.90 |
| -1 | -10 | 9  | 3.21 | 0.65 |
| 1  | 10  | 9  | 2.94 | 0.73 |
| -1 | -10 | 9  | 2.71 | 0.67 |
| -1 | -10 | 9  | 2.38 | 0.76 |
| -1 | -10 | 9  | 4.82 | 1.25 |
| -1 | -10 | 9  | 2.20 | 0.66 |
| 2  | -10 | 9  | 5.49 | 1.12 |
| 2  | -10 | 9  | 3.50 | 0.99 |
| 2  | -10 | 9  | 3.50 | 0.93 |
| 2  | -10 | 9  | 3.59 | 0.91 |
| -2 | 10  | 9  | 2.65 | 1.04 |
| 2  | -10 | 9  | 5.20 | 1.27 |
| 2  | -10 | 9  | 3.73 | 1.08 |
| -2 | 10  | 9  | 4.23 | 1.02 |
| 2  | -10 | 9  | 2.94 | 1.34 |
| -2 | 10  | 9  | 3.79 | 0.66 |
| -2 | -10 | -9 | 3.85 | 1.16 |
| -2 | -10 | -9 | 2.76 | 0.88 |
| -2 | 10  | 9  | 3.57 | 1.00 |
| -2 | 10  | 9  | 4.81 | 1.01 |
| -2 | 10  | 9  | 2.88 | 0.76 |
| 2  | 10  | 9  | 4.03 | 0.83 |

## CIF S3

|    |     |    |      |      |
|----|-----|----|------|------|
| -2 | -10 | 9  | 4.52 | 0.83 |
| 2  | -10 | -9 | 1.94 | 0.82 |
| -2 | -10 | 9  | 3.97 | 0.90 |
| -2 | -10 | 9  | 2.96 | 0.78 |
| -2 | -10 | 9  | 3.79 | 0.67 |
| -2 | -10 | 9  | 3.63 | 0.73 |
| -2 | -10 | 9  | 1.86 | 0.83 |
| 2  | 10  | 9  | 7.30 | 1.12 |
| -3 | -10 | -9 | 1.42 | 0.94 |
| -3 | 10  | 9  | 2.13 | 0.72 |
| 3  | -10 | 9  | 2.43 | 1.00 |
| -3 | 10  | 9  | 3.23 | 0.93 |
| 3  | -10 | 9  | 3.60 | 1.02 |
| -3 | -10 | -9 | 1.83 | 0.85 |
| 3  | -10 | 9  | 1.66 | 0.82 |
| -3 | 10  | 9  | 2.70 | 0.53 |
| -3 | 10  | 9  | 2.25 | 0.91 |
| 3  | -10 | 9  | 3.08 | 0.87 |
| -3 | 10  | 9  | 2.47 | 0.76 |
| -3 | -10 | -9 | 2.75 | 1.22 |
| 3  | -10 | 9  | 2.38 | 1.16 |
| -3 | -10 | -9 | 2.17 | 0.64 |
| -3 | -10 | 9  | 2.83 | 0.77 |
| -3 | -10 | 9  | 1.90 | 0.54 |
| 3  | 10  | 9  | 3.48 | 0.79 |
| -3 | -10 | 9  | 0.69 | 0.92 |
| 3  | -10 | -9 | 1.37 | 0.86 |
| -3 | -10 | 9  | 3.04 | 0.74 |
| -3 | -10 | 9  | 1.24 | 0.82 |
| -3 | -10 | 9  | 1.80 | 0.63 |
| -4 | -10 | -9 | 2.69 | 0.78 |
| -4 | 10  | 9  | 1.31 | 0.67 |
| -4 | -10 | -9 | 1.59 | 0.80 |
| -4 | 10  | 9  | 1.77 | 0.88 |
| -4 | -10 | -9 | 0.78 | 0.43 |
| -4 | -10 | -9 | 1.35 | 1.17 |
| -4 | 10  | 9  | 1.72 | 0.67 |
| -4 | 10  | 9  | 1.65 | 0.62 |
| -4 | -10 | -9 | 2.62 | 0.74 |
| 4  | -10 | 9  | 0.37 | 0.78 |
| -4 | 10  | 9  | 1.87 | 0.70 |

## CIF S3

|    |     |    |      |      |
|----|-----|----|------|------|
| -4 | -10 | 9  | 1.21 | 0.42 |
| -4 | -10 | 9  | 0.27 | 0.92 |
| 4  | 10  | 9  | 1.84 | 0.52 |
| -4 | -10 | 9  | 2.63 | 0.58 |
| 4  | -10 | -9 | 1.61 | 0.95 |
| -4 | -10 | 9  | 3.11 | 0.69 |
| 5  | -10 | 9  | 1.25 | 0.90 |
| -5 | 10  | 9  | 3.61 | 0.94 |
| -5 | -10 | -9 | 2.75 | 0.86 |
| -5 | 10  | 9  | 3.97 | 0.77 |
| -5 | -10 | -9 | 3.53 | 0.90 |
| -5 | -10 | -9 | 1.98 | 0.70 |
| -5 | 10  | 9  | 3.61 | 0.84 |
| -5 | 10  | 9  | 3.56 | 0.75 |
| -5 | -10 | -9 | 5.54 | 1.23 |
| -5 | 10  | 9  | 3.88 | 0.94 |
| -5 | -10 | -9 | 4.00 | 0.71 |
| -5 | 10  | 9  | 4.24 | 1.05 |
| -5 | -10 | 9  | 3.83 | 0.96 |
| -5 | -10 | 9  | 2.52 | 0.50 |
| 5  | 10  | 9  | 4.23 | 0.73 |
| -5 | -10 | 9  | 3.69 | 0.54 |
| 5  | -10 | -9 | 2.52 | 0.97 |
| -6 | -10 | -9 | 3.69 | 0.74 |
| -6 | -10 | -9 | 1.95 | 0.55 |
| -6 | 10  | 9  | 1.77 | 0.50 |
| -6 | 10  | 9  | 2.63 | 0.61 |
| -6 | 10  | 9  | 3.03 | 0.62 |
| -6 | -10 | -9 | 3.40 | 0.97 |
| -6 | 10  | 9  | 3.54 | 0.69 |
| -6 | -10 | -9 | 2.09 | 0.56 |
| -6 | 10  | 9  | 3.37 | 0.72 |
| -6 | 10  | -9 | 1.62 | 0.79 |
| 6  | 10  | 9  | 3.32 | 0.67 |
| -6 | -10 | 9  | 2.32 | 0.71 |
| -6 | 10  | -9 | 2.08 | 0.53 |
| 6  | -10 | -9 | 1.58 | 0.71 |
| -7 | 10  | 9  | 5.54 | 0.40 |
| -7 | -10 | -9 | 4.04 | 0.64 |
| -7 | 10  | 9  | 6.95 | 0.65 |
| -7 | 10  | 9  | 5.12 | 0.51 |

## CIF S3

|    |     |    |       |      |
|----|-----|----|-------|------|
| -7 | -10 | -9 | 4.40  | 0.61 |
| -7 | -10 | -9 | 5.44  | 0.77 |
| -7 | 10  | 9  | 5.09  | 0.48 |
| -7 | -10 | -9 | 5.49  | 0.61 |
| -7 | 10  | 9  | 5.00  | 0.52 |
| 7  | -10 | -9 | 6.26  | 0.80 |
| -7 | 10  | -9 | 4.87  | 0.88 |
| 0  | -11 | 9  | -0.01 | 0.76 |
| 0  | -11 | 9  | -0.52 | 0.74 |
| 0  | -11 | 9  | 0.44  | 0.76 |
| 0  | 11  | 9  | -0.21 | 0.64 |
| 0  | -11 | 9  | -0.25 | 0.56 |
| 0  | -11 | -9 | -0.87 | 0.90 |
| 0  | -11 | 9  | 0.17  | 0.63 |
| 0  | -11 | 9  | 0.93  | 0.77 |
| 0  | -11 | -9 | -0.06 | 0.67 |
| 0  | -11 | 9  | -0.83 | 0.69 |
| 0  | -11 | 9  | 0.37  | 0.67 |
| 0  | -11 | 9  | 0.24  | 0.86 |
| -1 | -11 | -9 | 6.78  | 0.78 |
| 1  | -11 | 9  | 6.43  | 1.62 |
| -1 | 11  | 9  | 6.65  | 1.29 |
| 1  | -11 | 9  | 7.69  | 1.27 |
| 1  | -11 | 9  | 8.04  | 1.03 |
| -1 | -11 | -9 | 9.19  | 1.18 |
| 1  | -11 | 9  | 7.12  | 1.28 |
| 1  | -11 | 9  | 6.83  | 1.06 |
| 1  | -11 | 9  | 6.11  | 1.22 |
| -1 | 11  | 9  | 6.28  | 1.00 |
| 1  | -11 | 9  | 9.36  | 1.04 |
| 1  | -11 | 9  | 7.37  | 1.02 |
| 1  | -11 | -9 | 6.21  | 1.00 |
| -1 | -11 | 9  | 7.14  | 1.06 |
| -1 | -11 | 9  | 8.20  | 0.99 |
| -1 | -11 | 9  | 8.10  | 1.27 |
| -1 | -11 | 9  | 7.62  | 1.00 |
| -1 | -11 | 9  | 7.83  | 1.07 |
| -1 | -11 | 9  | 8.34  | 1.02 |
| 1  | -11 | -9 | 7.37  | 1.20 |
| -1 | -11 | 9  | 9.21  | 1.21 |
| -1 | -11 | 9  | 6.95  | 0.96 |

## CIF S3

|    |     |    |      |      |
|----|-----|----|------|------|
| 1  | 11  | 9  | 8.47 | 0.96 |
| -1 | -11 | 9  | 6.50 | 0.91 |
| -2 | 11  | 9  | 2.56 | 0.62 |
| 2  | -11 | 9  | 1.53 | 0.86 |
| 2  | -11 | 9  | 3.14 | 0.74 |
| -2 | -11 | -9 | 3.55 | 0.87 |
| 2  | -11 | 9  | 4.32 | 1.08 |
| 2  | -11 | 9  | 1.64 | 0.82 |
| -2 | 11  | 9  | 2.92 | 0.65 |
| -2 | 11  | 9  | 2.51 | 0.94 |
| -2 | 11  | 9  | 1.76 | 0.74 |
| 2  | -11 | 9  | 4.63 | 1.21 |
| 2  | -11 | 9  | 2.00 | 0.72 |
| 2  | -11 | 9  | 4.22 | 1.31 |
| 2  | 11  | 9  | 3.95 | 0.80 |
| -2 | -11 | 9  | 2.80 | 0.60 |
| -2 | -11 | 9  | 2.08 | 0.61 |
| -2 | -11 | 9  | 2.75 | 0.70 |
| -2 | -11 | 9  | 2.34 | 0.84 |
| -2 | -11 | 9  | 3.64 | 0.86 |
| -2 | -11 | 9  | 2.80 | 0.64 |
| 2  | -11 | -9 | 3.61 | 1.13 |
| -3 | -11 | -9 | 4.03 | 0.78 |
| -3 | -11 | -9 | 4.14 | 1.11 |
| 3  | -11 | 9  | 3.88 | 1.07 |
| -3 | 11  | 9  | 2.38 | 0.68 |
| 3  | -11 | 9  | 2.34 | 0.81 |
| 3  | -11 | 9  | 0.75 | 0.99 |
| -3 | -11 | -9 | 1.99 | 0.77 |
| -3 | 11  | 9  | 3.18 | 0.96 |
| -3 | -11 | -9 | 4.51 | 1.02 |
| -3 | 11  | 9  | 2.36 | 0.72 |
| -3 | 11  | 9  | 3.71 | 0.93 |
| 3  | -11 | 9  | 3.85 | 0.89 |
| -3 | -11 | -9 | 2.44 | 0.83 |
| 3  | 11  | 9  | 4.15 | 0.79 |
| -3 | -11 | 9  | 2.50 | 0.69 |
| 3  | -11 | -9 | 6.41 | 1.26 |
| -3 | -11 | 9  | 3.75 | 0.67 |
| -3 | -11 | 9  | 3.80 | 0.84 |
| -3 | -11 | 9  | 3.49 | 1.06 |



## CIF S3

|    |     |    |      |      |
|----|-----|----|------|------|
| -4 | -11 | -9 | 2.16 | 0.70 |
| -4 | 11  | 9  | 1.61 | 0.61 |
| -4 | -11 | -9 | 3.36 | 1.09 |
| -4 | 11  | 9  | 1.83 | 0.60 |
| -4 | 11  | 9  | 1.54 | 0.55 |
| -4 | -11 | -9 | 3.48 | 0.81 |
| 4  | -11 | 9  | 2.15 | 0.87 |
| -4 | -11 | -9 | 1.03 | 0.75 |
| -4 | 11  | 9  | 2.30 | 0.85 |
| -4 | -11 | 9  | 2.23 | 0.51 |
| 4  | 11  | 9  | 2.53 | 0.69 |
| 4  | -11 | -9 | 4.42 | 1.29 |
| -4 | -11 | 9  | 1.19 | 0.42 |
| -4 | -11 | 9  | 3.12 | 0.62 |
| -5 | -11 | -9 | 7.04 | 1.00 |
| -5 | 11  | 9  | 6.37 | 0.82 |
| -5 | -11 | -9 | 4.95 | 0.90 |
| -5 | 11  | 9  | 5.64 | 0.80 |
| -5 | 11  | 9  | 6.54 | 0.87 |
| -5 | 11  | 9  | 7.46 | 0.97 |
| -5 | 11  | 9  | 6.28 | 0.77 |
| -5 | -11 | -9 | 6.78 | 0.60 |
| -5 | 11  | 9  | 6.76 | 0.72 |
| -5 | 11  | 9  | 5.19 | 1.00 |
| 5  | 11  | 9  | 6.92 | 0.85 |
| 5  | -11 | -9 | 8.27 | 1.18 |
| -5 | -11 | 9  | 6.36 | 0.55 |
| -6 | 11  | -9 | 0.61 | 0.67 |
| 0  | -12 | 9  | 1.48 | 0.59 |
| 0  | -12 | 9  | 2.67 | 0.70 |
| 0  | 12  | 9  | 3.37 | 0.85 |
| 0  | -12 | 9  | 1.27 | 0.62 |
| 0  | -12 | 9  | 3.39 | 0.86 |
| 0  | -12 | 9  | 2.59 | 0.75 |
| 0  | -12 | -9 | 2.85 | 0.63 |
| 0  | -12 | 9  | 3.11 | 1.02 |
| 0  | -12 | -9 | 2.01 | 0.84 |
| 0  | -12 | 9  | 2.81 | 0.65 |
| 0  | -12 | 9  | 2.59 | 0.63 |
| 1  | -12 | 9  | 8.77 | 0.98 |
| -1 | -12 | -9 | 5.04 | 1.10 |

## CIF S3

|    |     |    |       |      |
|----|-----|----|-------|------|
| 1  | -12 | 9  | 6.26  | 0.89 |
| -1 | 12  | 9  | 6.84  | 0.92 |
| -1 | 12  | 9  | 6.43  | 1.20 |
| 1  | -12 | 9  | 5.22  | 0.93 |
| 1  | -12 | 9  | 8.14  | 0.89 |
| 1  | -12 | 9  | 7.87  | 1.10 |
| 1  | -12 | 9  | 7.08  | 1.39 |
| 1  | -12 | 9  | 7.99  | 1.26 |
| 1  | 12  | 9  | 7.63  | 0.95 |
| -1 | -12 | 9  | 7.00  | 0.97 |
| 1  | -12 | -9 | 5.13  | 1.05 |
| 1  | -12 | -9 | 7.36  | 1.10 |
| -1 | -12 | 9  | 5.48  | 0.79 |
| -1 | -12 | 9  | 6.66  | 0.90 |
| -1 | -12 | 9  | 6.85  | 0.93 |
| -1 | -12 | 9  | 5.53  | 0.90 |
| -1 | -12 | 9  | 5.93  | 1.24 |
| -2 | 12  | 9  | 12.54 | 1.41 |
| 2  | -12 | 9  | 12.49 | 1.17 |
| -2 | -12 | -9 | 9.24  | 1.21 |
| 2  | -12 | 9  | 13.44 | 1.09 |
| 2  | -12 | 9  | 12.21 | 1.27 |
| 2  | -12 | 9  | 9.95  | 1.11 |
| 2  | -12 | 9  | 15.29 | 1.31 |
| -2 | 12  | 9  | 13.02 | 1.14 |
| -2 | 12  | 9  | 14.75 | 0.87 |
| -2 | 12  | 9  | 13.40 | 1.13 |
| 2  | -12 | 9  | 13.47 | 1.29 |
| -2 | -12 | -9 | 13.57 | 1.06 |
| -2 | -12 | 9  | 14.69 | 1.06 |
| -2 | -12 | 9  | 13.82 | 0.96 |
| 2  | 12  | 9  | 12.82 | 1.09 |
| -2 | -12 | 9  | 13.39 | 1.03 |
| 2  | -12 | -9 | 12.33 | 1.23 |
| 2  | -12 | -9 | 12.38 | 1.24 |
| -3 | -12 | -9 | 6.00  | 1.01 |
| 3  | -12 | 9  | 4.95  | 0.96 |
| 3  | -12 | 9  | 4.58  | 0.96 |
| -3 | 12  | 9  | 5.24  | 0.89 |
| -3 | -12 | -9 | 3.47  | 1.00 |
| -3 | 12  | 9  | 5.23  | 0.94 |

## CIF S3

|    |     |    |       |      |
|----|-----|----|-------|------|
| -3 | -12 | -9 | 5.45  | 0.89 |
| -3 | 12  | 9  | 4.59  | 0.92 |
| -3 | -12 | -9 | 2.25  | 1.00 |
| -3 | 12  | 9  | 6.00  | 0.84 |
| 3  | -12 | 9  | 4.49  | 1.25 |
| -3 | -12 | 9  | 5.64  | 0.72 |
| 3  | 12  | 9  | 6.11  | 0.75 |
| -3 | -12 | 9  | 5.50  | 0.72 |
| 3  | -12 | -9 | 5.97  | 1.10 |
| 3  | -12 | -9 | 5.05  | 0.75 |
| -3 | -12 | 9  | 5.98  | 0.64 |
| -4 | 12  | 9  | 8.30  | 1.10 |
| -4 | -12 | -9 | 8.81  | 0.76 |
| -4 | 12  | 9  | 8.87  | 0.85 |
| -4 | 12  | 9  | 8.40  | 0.89 |
| -4 | -12 | -9 | 6.91  | 1.00 |
| 4  | -12 | 9  | 6.57  | 0.93 |
| 4  | -12 | -9 | 11.99 | 1.38 |
| -4 | -12 | 9  | 9.16  | 0.70 |
| 4  | -12 | -9 | 9.30  | 0.84 |
| -4 | -12 | 9  | 10.64 | 0.70 |
| -5 | -12 | -9 | -0.15 | 0.44 |
| -5 | 12  | 9  | 1.03  | 0.44 |
| -5 | 12  | 9  | 0.89  | 0.39 |
| -5 | 12  | 9  | 0.68  | 0.37 |
| -5 | 12  | 9  | 1.10  | 0.40 |
| -5 | 12  | 9  | 0.18  | 0.32 |
| -5 | -12 | -9 | 0.68  | 0.46 |
| -5 | 12  | 9  | 0.50  | 0.35 |
| 5  | -12 | -9 | 0.57  | 0.36 |
| -5 | -12 | 9  | 1.29  | 0.23 |
| -5 | -12 | 9  | 0.46  | 0.19 |
| -5 | -12 | 9  | 0.95  | 0.27 |
| -5 | 12  | -9 | 1.18  | 0.33 |
| 0  | -13 | 9  | 2.28  | 0.56 |
| 0  | -13 | 9  | 2.44  | 1.18 |
| 0  | -13 | 9  | 2.80  | 0.57 |
| 0  | 13  | 9  | 1.25  | 0.47 |
| 0  | -13 | 9  | 2.47  | 0.73 |
| 0  | -13 | 9  | 2.25  | 0.78 |
| 0  | -13 | -9 | 1.93  | 0.69 |

## CIF S3

|    |     |    |      |      |
|----|-----|----|------|------|
| 0  | -13 | 9  | 1.38 | 0.50 |
| -1 | -13 | -9 | 1.66 | 0.61 |
| -1 | 13  | 9  | 2.36 | 0.92 |
| 1  | -13 | 9  | 2.25 | 1.02 |
| 1  | -13 | 9  | 3.40 | 0.82 |
| 1  | -13 | 9  | 0.69 | 0.55 |
| -1 | 13  | 9  | 1.46 | 0.37 |
| 1  | -13 | 9  | 2.06 | 0.59 |
| 1  | -13 | 9  | 1.40 | 0.45 |
| -1 | 13  | 9  | 2.02 | 0.54 |
| 1  | -13 | -9 | 0.75 | 0.60 |
| -1 | -13 | 9  | 0.70 | 0.46 |
| -1 | -13 | 9  | 1.80 | 0.51 |
| -1 | -13 | 9  | 2.01 | 0.76 |
| -1 | -13 | 9  | 1.49 | 0.47 |
| 1  | 13  | 9  | 1.32 | 0.47 |
| -1 | -13 | 9  | 0.77 | 0.44 |
| 2  | -13 | 9  | 6.58 | 0.84 |
| -2 | 13  | 9  | 6.71 | 0.77 |
| 2  | -13 | 9  | 6.75 | 0.93 |
| -2 | 13  | 9  | 5.81 | 1.09 |
| 2  | -13 | 9  | 5.47 | 0.80 |
| 2  | -13 | 9  | 5.50 | 0.75 |
| -2 | -13 | 9  | 5.80 | 0.76 |
| 2  | 13  | 9  | 5.43 | 0.71 |
| -2 | -13 | 9  | 6.86 | 1.06 |
| -2 | -13 | 9  | 5.79 | 0.67 |
| 2  | -13 | -9 | 5.27 | 0.68 |
| -3 | 13  | 9  | 2.77 | 0.71 |
| 3  | -13 | 9  | 2.74 | 0.69 |
| -3 | 13  | 9  | 3.91 | 0.95 |
| -3 | -13 | -9 | 3.84 | 0.80 |
| 3  | -13 | 9  | 3.52 | 0.79 |
| 3  | -13 | 9  | 4.80 | 0.87 |
| -3 | 13  | 9  | 3.45 | 0.65 |
| -3 | -13 | 9  | 4.23 | 0.49 |
| 3  | -13 | -9 | 4.52 | 0.69 |
| -3 | -13 | 9  | 3.79 | 0.55 |
| -4 | 13  | 9  | 2.10 | 0.57 |
| -4 | 13  | 9  | 1.59 | 0.50 |
| -4 | 13  | 9  | 1.35 | 0.35 |

## CIF S3

|    |     |     |       |      |
|----|-----|-----|-------|------|
| -4 | -13 | -9  | 0.67  | 0.45 |
| -4 | 13  | 9   | 1.65  | 0.32 |
| -4 | -13 | 9   | 2.24  | 0.36 |
| 4  | -13 | -9  | 2.23  | 0.59 |
| 0  | 14  | 9   | 0.52  | 0.46 |
| 0  | -14 | 9   | 0.41  | 0.28 |
| 0  | -14 | 9   | 0.26  | 0.36 |
| 0  | -14 | 9   | 0.10  | 0.58 |
| 0  | -14 | -9  | 0.08  | 0.60 |
| 0  | -14 | 9   | 0.81  | 0.37 |
| 0  | 14  | 9   | 0.30  | 0.28 |
| 0  | -14 | 9   | 0.23  | 0.34 |
| 1  | -14 | 9   | 0.36  | 0.37 |
| -1 | -14 | -9  | -0.59 | 0.50 |
| 1  | -14 | 9   | -0.28 | 0.39 |
| -1 | 14  | 9   | 0.54  | 0.41 |
| 1  | -14 | 9   | -0.10 | 0.31 |
| 1  | -14 | 9   | 0.43  | 0.56 |
| -1 | -14 | 9   | -0.01 | 0.31 |
| -1 | -14 | 9   | -0.91 | 0.79 |
| -1 | -14 | 9   | 0.16  | 0.32 |
| -1 | -14 | 9   | -0.23 | 0.34 |
| -1 | -14 | 9   | 0.15  | 0.33 |
| 1  | -14 | -9  | 0.25  | 0.57 |
| 0  | 0   | -10 | 72.05 | 3.67 |
| 0  | 0   | -10 | 73.49 | 3.58 |
| 0  | 0   | 10  | 66.42 | 3.38 |
| 0  | 0   | -10 | 56.29 | 3.98 |
| -1 | 0   | -10 | 2.49  | 0.85 |
| 1  | 0   | 10  | 2.18  | 0.45 |
| 1  | 0   | -10 | 2.24  | 0.77 |
| -1 | 0   | -10 | 1.22  | 0.72 |
| -1 | 0   | 10  | 2.48  | 0.62 |
| -1 | 0   | -10 | 1.65  | 0.93 |
| 1  | 0   | -10 | 2.80  | 0.73 |
| 2  | 0   | -10 | 10.84 | 0.98 |
| -2 | 0   | -10 | 9.74  | 1.60 |
| -2 | 0   | 10  | 12.86 | 0.87 |
| -2 | 0   | -10 | 13.22 | 1.22 |
| 2  | 0   | 10  | 11.44 | 1.66 |
| 2  | 0   | -10 | 14.04 | 1.13 |

## CIF S3

|    |   |     |       |      |
|----|---|-----|-------|------|
| 2  | 0 | 10  | 13.89 | 0.88 |
| -2 | 0 | 10  | 13.06 | 0.79 |
| -2 | 0 | -10 | 10.61 | 1.14 |
| 3  | 0 | -10 | 16.37 | 1.29 |
| -3 | 0 | -10 | 17.10 | 1.29 |
| -3 | 0 | -10 | 17.52 | 1.40 |
| -3 | 0 | 10  | 16.56 | 0.97 |
| -3 | 0 | 10  | 16.12 | 1.03 |
| 3  | 0 | -10 | 18.11 | 1.32 |
| 3  | 0 | -10 | 16.07 | 1.20 |
| 3  | 0 | 10  | 16.17 | 1.14 |
| -4 | 0 | 10  | 13.95 | 1.11 |
| -4 | 0 | -10 | 15.13 | 1.25 |
| -4 | 0 | 10  | 14.28 | 0.92 |
| -4 | 0 | 10  | 15.30 | 0.87 |
| 4  | 0 | 10  | 15.15 | 1.10 |
| 4  | 0 | -10 | 14.38 | 1.20 |
| -4 | 0 | -10 | 13.89 | 1.53 |
| 4  | 0 | -10 | 13.32 | 0.96 |
| -5 | 0 | 10  | 29.96 | 1.81 |
| 5  | 0 | -10 | 30.55 | 1.62 |
| -5 | 0 | 10  | 28.20 | 1.67 |
| -5 | 0 | -10 | 27.01 | 2.05 |
| -5 | 0 | -10 | 28.35 | 1.88 |
| -5 | 0 | -10 | 24.97 | 1.67 |
| -5 | 0 | 10  | 28.74 | 1.49 |
| -6 | 0 | 10  | 8.41  | 0.61 |
| -6 | 0 | -10 | 8.59  | 1.12 |
| -6 | 0 | -10 | 8.92  | 0.96 |
| -6 | 0 | 10  | 8.97  | 1.03 |
| -7 | 0 | -10 | 1.36  | 1.14 |
| -7 | 0 | -10 | -0.30 | 0.90 |
| 7  | 0 | 10  | 1.57  | 1.04 |
| -7 | 0 | -10 | 0.63  | 0.55 |
| -7 | 0 | -10 | 0.48  | 0.59 |
| -8 | 0 | -10 | 1.30  | 0.97 |
| 8  | 0 | 10  | 0.80  | 0.58 |
| -8 | 0 | -10 | 0.57  | 0.45 |
| -8 | 0 | -10 | 0.64  | 0.47 |
| -8 | 0 | -10 | 0.95  | 0.49 |
| -8 | 0 | -10 | 1.33  | 0.55 |

## CIF S3

|    |    |     |       |      |
|----|----|-----|-------|------|
| -8 | 0  | -10 | -0.53 | 0.79 |
| -9 | 0  | -10 | 0.67  | 0.70 |
| -9 | 0  | -10 | 0.43  | 0.38 |
| -9 | 0  | -10 | 0.53  | 0.38 |
| -9 | 0  | -10 | 0.59  | 0.36 |
| 9  | 0  | 10  | 0.29  | 0.38 |
| 0  | -1 | 10  | 1.48  | 0.43 |
| 0  | -1 | -10 | 1.84  | 0.74 |
| 0  | 1  | -10 | 1.79  | 0.70 |
| 0  | -1 | -10 | 1.44  | 0.87 |
| 0  | 1  | 10  | 1.54  | 0.42 |
| 0  | 1  | -10 | 1.72  | 0.88 |
| 0  | -1 | -10 | 1.44  | 0.85 |
| 0  | 1  | -10 | 1.92  | 0.65 |
| -1 | 1  | 10  | 49.54 | 2.51 |
| 1  | -1 | 10  | 49.12 | 2.48 |
| 1  | 1  | -10 | 51.06 | 2.62 |
| 1  | 1  | -10 | 47.47 | 2.70 |
| -1 | -1 | -10 | 52.12 | 2.79 |
| -1 | -1 | -10 | 46.19 | 2.67 |
| -1 | 1  | 10  | 45.34 | 2.43 |
| -1 | 1  | -10 | 42.27 | 3.15 |
| -1 | 1  | -10 | 44.94 | 2.65 |
| -1 | -1 | 10  | 48.55 | 2.47 |
| 1  | -1 | -10 | 41.09 | 3.04 |
| 1  | -1 | -10 | 52.93 | 2.63 |
| 1  | 1  | 10  | 46.11 | 2.48 |
| -1 | 1  | -10 | 50.71 | 2.83 |
| 1  | -1 | -10 | 49.89 | 2.77 |
| -1 | -1 | 10  | 47.63 | 2.88 |
| -2 | -1 | -10 | 0.53  | 0.90 |
| 2  | 1  | -10 | 1.26  | 0.58 |
| -2 | 1  | 10  | -0.26 | 0.97 |
| 2  | 1  | -10 | 2.53  | 0.78 |
| -2 | -1 | -10 | 1.12  | 0.68 |
| -2 | 1  | 10  | 1.70  | 0.44 |
| 2  | -1 | 10  | 1.08  | 0.44 |
| -2 | -1 | -10 | 1.17  | 0.63 |
| 2  | -1 | 10  | 0.72  | 1.02 |
| -2 | 1  | 10  | 1.10  | 0.35 |
| -2 | 1  | -10 | 0.64  | 0.73 |

## CIF S3

|    |    |     |       |      |
|----|----|-----|-------|------|
| 2  | -1 | -10 | 1.79  | 0.82 |
| 2  | 1  | 10  | 0.71  | 1.03 |
| -2 | 1  | -10 | 0.68  | 0.53 |
| 2  | -1 | -10 | 1.02  | 0.71 |
| -2 | 1  | -10 | 1.96  | 0.79 |
| -2 | -1 | 10  | 1.46  | 0.32 |
| 2  | 1  | 10  | 1.23  | 0.43 |
| -2 | 1  | -10 | 1.22  | 0.98 |
| -2 | -1 | 10  | 1.42  | 0.41 |
| 3  | 1  | -10 | 13.28 | 1.00 |
| 3  | -1 | 10  | 12.82 | 1.01 |
| -3 | 1  | 10  | 12.78 | 0.90 |
| 3  | 1  | -10 | 13.41 | 1.09 |
| -3 | -1 | -10 | 13.17 | 1.24 |
| 3  | 1  | -10 | 12.67 | 0.88 |
| -3 | 1  | 10  | 12.29 | 0.81 |
| -3 | -1 | -10 | 13.63 | 1.37 |
| -3 | 1  | -10 | 15.34 | 1.37 |
| -3 | 1  | -10 | 13.61 | 1.06 |
| -3 | -1 | 10  | 12.38 | 0.79 |
| 3  | -1 | -10 | 13.18 | 1.23 |
| -3 | -1 | 10  | 12.28 | 0.71 |
| -3 | -1 | 10  | 12.61 | 0.85 |
| -3 | 1  | -10 | 12.56 | 1.22 |
| 3  | 1  | 10  | 12.71 | 0.93 |
| 3  | -1 | -10 | 13.38 | 1.12 |
| -4 | 1  | 10  | 18.09 | 1.39 |
| -4 | 1  | 10  | 20.00 | 1.00 |
| -4 | -1 | -10 | 18.94 | 1.61 |
| -4 | -1 | -10 | 20.20 | 1.53 |
| -4 | 1  | 10  | 20.12 | 1.18 |
| 4  | 1  | -10 | 20.50 | 1.17 |
| -4 | 1  | 10  | 19.70 | 1.12 |
| 4  | 1  | -10 | 18.14 | 1.34 |
| 4  | -1 | 10  | 19.38 | 1.29 |
| -4 | -1 | 10  | 18.87 | 1.30 |
| -4 | 1  | -10 | 20.05 | 1.71 |
| -4 | -1 | 10  | 20.59 | 1.09 |
| 4  | -1 | -10 | 18.68 | 1.49 |
| -4 | -1 | 10  | 19.47 | 1.12 |
| 4  | -1 | -10 | 20.14 | 1.37 |



## CIF S3

|    |    |     |       |      |
|----|----|-----|-------|------|
| 4  | 1  | 10  | 19.72 | 1.26 |
| -4 | 1  | -10 | 21.47 | 1.46 |
| -5 | -1 | -10 | 9.75  | 1.18 |
| -5 | 1  | 10  | 9.10  | 0.76 |
| -5 | 1  | 10  | 9.21  | 0.69 |
| -5 | -1 | -10 | 9.99  | 1.00 |
| -5 | 1  | 10  | 9.06  | 1.02 |
| 5  | -1 | -10 | 10.58 | 1.53 |
| -5 | 1  | -10 | 9.88  | 1.16 |
| -5 | -1 | 10  | 9.29  | 0.64 |
| -5 | 1  | -10 | 8.54  | 0.89 |
| 5  | -1 | -10 | 10.29 | 0.84 |
| -5 | 1  | -10 | 11.56 | 1.39 |
| -5 | -1 | 10  | 11.07 | 1.12 |
| -6 | 1  | 10  | 18.58 | 1.14 |
| -6 | -1 | -10 | 20.63 | 1.33 |
| -6 | -1 | -10 | 16.79 | 1.48 |
| -6 | -1 | -10 | 17.10 | 1.59 |
| -6 | 1  | -10 | 23.93 | 1.57 |
| -6 | -1 | 10  | 21.54 | 1.43 |
| -6 | -1 | 10  | 20.66 | 1.08 |
| -6 | 1  | -10 | 25.99 | 2.08 |
| -6 | 1  | -10 | 20.70 | 1.37 |
| -7 | 1  | 10  | 2.83  | 0.35 |
| -7 | 1  | 10  | 3.14  | 0.37 |
| -7 | -1 | -10 | 5.05  | 1.27 |
| -7 | -1 | -10 | 3.43  | 0.82 |
| 7  | -1 | 10  | 5.03  | 0.95 |
| -7 | -1 | -10 | 3.56  | 0.92 |
| -7 | 1  | 10  | 4.13  | 0.37 |
| -7 | -1 | -10 | 5.06  | 1.39 |
| -7 | -1 | -10 | 3.67  | 0.80 |
| -7 | 1  | -10 | 3.38  | 0.96 |
| -7 | 1  | -10 | 2.79  | 1.08 |
| -7 | 1  | -10 | 3.49  | 0.62 |
| -7 | 1  | -10 | 3.21  | 0.85 |
| -7 | 1  | -10 | 1.77  | 0.57 |
| -8 | -1 | -10 | 1.05  | 0.50 |
| -8 | -1 | -10 | 1.45  | 0.51 |
| -8 | -1 | -10 | 0.43  | 0.51 |
| -8 | -1 | -10 | 1.22  | 0.49 |

## CIF S3

|    |    |     |       |      |
|----|----|-----|-------|------|
| -8 | -1 | -10 | 0.87  | 0.87 |
| 8  | -1 | 10  | 1.01  | 0.58 |
| -8 | -1 | -10 | 0.57  | 0.97 |
| -8 | -1 | -10 | 0.17  | 0.51 |
| -8 | 1  | -10 | 0.69  | 0.50 |
| -8 | 1  | -10 | 1.55  | 0.52 |
| -8 | 1  | -10 | 0.56  | 0.90 |
| 8  | 1  | 10  | 1.26  | 0.49 |
| -8 | 1  | -10 | 1.06  | 0.48 |
| -9 | -1 | -10 | 1.46  | 0.72 |
| -9 | -1 | -10 | 2.80  | 0.59 |
| -9 | -1 | -10 | 2.10  | 0.56 |
| 9  | -1 | 10  | 2.23  | 0.65 |
| -9 | -1 | -10 | 2.90  | 0.63 |
| -9 | -1 | -10 | 2.12  | 0.66 |
| -9 | 1  | -10 | 2.33  | 0.64 |
| -9 | 1  | -10 | 3.58  | 0.61 |
| -9 | 1  | -10 | 2.12  | 0.56 |
| -9 | 1  | -10 | 3.35  | 1.00 |
| 9  | 1  | 10  | 2.44  | 0.67 |
| 0  | -2 | 10  | 0.73  | 0.48 |
| 0  | -2 | -10 | 0.13  | 0.78 |
| 0  | 2  | -10 | -0.53 | 0.80 |
| 0  | -2 | 10  | 0.23  | 0.35 |
| 0  | 2  | -10 | 0.11  | 0.54 |
| 0  | 2  | 10  | -0.16 | 0.36 |
| 0  | -2 | -10 | -1.39 | 0.71 |
| 0  | -2 | -10 | -0.61 | 0.85 |
| 0  | 2  | -10 | 0.10  | 0.67 |
| -1 | -2 | -10 | 20.61 | 2.11 |
| -1 | -2 | -10 | 26.84 | 1.70 |
| 1  | -2 | 10  | 25.08 | 1.44 |
| -1 | 2  | 10  | 27.50 | 1.42 |
| 1  | 2  | -10 | 25.47 | 1.58 |
| 1  | 2  | -10 | 27.50 | 1.70 |
| -1 | 2  | 10  | 26.90 | 1.48 |
| 1  | -2 | -10 | 26.35 | 1.76 |
| 1  | 2  | 10  | 22.00 | 2.33 |
| -1 | 2  | -10 | 30.06 | 1.67 |
| 1  | 2  | 10  | 25.37 | 1.44 |
| -1 | 2  | -10 | 25.55 | 1.74 |

## CIF S3

|    |    |     |       |      |
|----|----|-----|-------|------|
| -1 | 2  | -10 | 24.52 | 2.19 |
| 1  | -2 | -10 | 21.94 | 2.08 |
| 1  | -2 | -10 | 27.44 | 1.72 |
| -1 | -2 | 10  | 25.70 | 1.48 |
| -1 | -2 | 10  | 26.61 | 1.91 |
| -2 | -2 | -10 | 9.84  | 1.56 |
| 2  | -2 | 10  | 12.62 | 0.84 |
| 2  | 2  | -10 | 9.91  | 0.90 |
| 2  | 2  | -10 | 9.95  | 1.00 |
| 2  | -2 | 10  | 7.50  | 1.61 |
| -2 | 2  | 10  | 8.77  | 0.82 |
| -2 | -2 | -10 | 11.02 | 1.06 |
| -2 | 2  | 10  | 9.73  | 1.19 |
| -2 | 2  | -10 | 10.29 | 1.05 |
| -2 | -2 | 10  | 10.44 | 0.71 |
| 2  | 2  | 10  | 6.86  | 1.63 |
| -2 | -2 | 10  | 9.77  | 0.78 |
| 2  | 2  | 10  | 11.04 | 0.80 |
| -2 | 2  | -10 | 11.00 | 1.52 |
| 2  | -2 | -10 | 9.70  | 1.07 |
| 2  | -2 | -10 | 9.68  | 1.18 |
| -2 | 2  | -10 | 9.95  | 1.02 |
| -2 | 2  | -10 | 10.23 | 0.91 |
| 3  | 2  | -10 | 32.99 | 1.86 |
| -3 | 2  | 10  | 34.78 | 1.80 |
| 3  | 2  | -10 | 33.20 | 1.78 |
| 3  | -2 | 10  | 30.49 | 1.86 |
| -3 | 2  | 10  | 31.76 | 1.86 |
| 3  | 2  | -10 | 33.65 | 1.94 |
| -3 | -2 | -10 | 34.14 | 2.07 |
| -3 | 2  | 10  | 33.06 | 1.75 |
| -3 | 2  | -10 | 35.97 | 2.00 |
| 3  | -2 | -10 | 33.65 | 2.04 |
| 3  | -2 | -10 | 30.18 | 2.11 |
| -3 | 2  | -10 | 33.73 | 2.17 |
| -3 | 2  | -10 | 34.42 | 1.92 |
| -3 | -2 | 10  | 29.93 | 1.83 |
| -3 | -2 | 10  | 32.60 | 1.76 |
| 3  | 2  | 10  | 29.75 | 1.83 |
| -3 | -2 | 10  | 32.74 | 1.72 |
| -3 | -2 | 10  | 33.41 | 1.65 |

## CIF S3

|    |    |     |       |      |
|----|----|-----|-------|------|
| -3 | -2 | 10  | 35.13 | 1.65 |
| 4  | -2 | 10  | 12.12 | 0.99 |
| -4 | 2  | 10  | 12.10 | 0.79 |
| 4  | 2  | -10 | 11.70 | 0.77 |
| -4 | 2  | 10  | 9.26  | 0.80 |
| -4 | 2  | 10  | 12.61 | 0.88 |
| -4 | 2  | 10  | 10.40 | 1.10 |
| -4 | -2 | -10 | 11.74 | 1.25 |
| -4 | 2  | -10 | 12.11 | 1.04 |
| -4 | -2 | 10  | 10.17 | 0.98 |
| 4  | 2  | 10  | 10.09 | 0.91 |
| -4 | -2 | 10  | 11.59 | 0.76 |
| -4 | -2 | 10  | 11.39 | 0.72 |
| 4  | -2 | -10 | 10.42 | 1.28 |
| -4 | 2  | -10 | 13.28 | 1.36 |
| 4  | -2 | -10 | 10.32 | 1.19 |
| -4 | 2  | -10 | 11.19 | 1.13 |
| -5 | 2  | 10  | 44.57 | 2.38 |
| -5 | 2  | 10  | 49.74 | 2.43 |
| 5  | -2 | 10  | 50.09 | 2.72 |
| -5 | -2 | -10 | 46.74 | 2.51 |
| -5 | -2 | -10 | 46.55 | 2.68 |
| -5 | 2  | 10  | 43.95 | 2.61 |
| -5 | 2  | -10 | 51.65 | 2.73 |
| -5 | 2  | -10 | 42.53 | 2.83 |
| -5 | -2 | 10  | 45.03 | 2.59 |
| 5  | -2 | -10 | 42.10 | 2.74 |
| -5 | -2 | 10  | 46.14 | 2.33 |
| -6 | -2 | -10 | -0.10 | 0.71 |
| -6 | -2 | -10 | 0.22  | 0.55 |
| -6 | 2  | 10  | 0.51  | 0.36 |
| -6 | -2 | -10 | -0.30 | 0.66 |
| -6 | 2  | 10  | 1.01  | 0.42 |
| -6 | 2  | -10 | 1.73  | 0.64 |
| -6 | 2  | -10 | 0.38  | 0.72 |
| -6 | -2 | 10  | 1.11  | 0.26 |
| -7 | -2 | -10 | 5.47  | 0.83 |
| -7 | -2 | -10 | 5.89  | 0.88 |
| -7 | 2  | 10  | 5.19  | 0.51 |
| -7 | -2 | -10 | 4.61  | 0.83 |
| -7 | 2  | 10  | 5.57  | 0.50 |

## CIF S3

|    |    |     |       |      |
|----|----|-----|-------|------|
| -7 | -2 | -10 | 5.37  | 1.26 |
| 7  | -2 | 10  | 6.63  | 0.96 |
| -7 | -2 | -10 | 5.74  | 1.41 |
| -7 | 2  | -10 | 4.70  | 0.87 |
| -7 | 2  | -10 | 6.90  | 1.42 |
| -7 | 2  | -10 | 5.75  | 1.49 |
| -7 | 2  | -10 | 4.36  | 0.84 |
| -7 | 2  | -10 | 4.32  | 0.67 |
| -8 | -2 | -10 | 3.71  | 0.77 |
| 8  | -2 | 10  | 3.76  | 0.89 |
| -8 | -2 | -10 | 3.83  | 0.78 |
| -8 | -2 | -10 | 2.90  | 0.61 |
| -8 | -2 | -10 | 3.13  | 0.74 |
| -8 | -2 | -10 | 3.06  | 0.73 |
| -8 | -2 | -10 | 4.99  | 1.31 |
| -8 | -2 | -10 | 4.28  | 1.16 |
| 8  | 2  | 10  | 2.06  | 0.61 |
| -8 | 2  | -10 | 2.39  | 0.92 |
| -8 | 2  | -10 | 4.51  | 0.85 |
| -8 | 2  | -10 | 4.27  | 0.87 |
| -8 | 2  | -10 | 2.23  | 0.55 |
| -9 | -2 | -10 | 1.01  | 0.59 |
| -9 | -2 | -10 | 1.50  | 0.69 |
| -9 | -2 | -10 | 1.02  | 0.36 |
| -9 | -2 | -10 | 0.76  | 0.37 |
| 9  | -2 | 10  | 0.78  | 0.40 |
| -9 | -2 | -10 | 0.76  | 0.34 |
| -9 | 2  | -10 | 2.41  | 0.55 |
| -9 | 2  | -10 | 0.79  | 0.38 |
| -9 | 2  | -10 | 1.83  | 0.64 |
| -9 | 2  | -10 | 0.85  | 0.38 |
| 9  | 2  | 10  | 0.88  | 0.38 |
| 0  | -3 | 10  | 9.56  | 0.87 |
| 0  | 3  | -10 | 10.37 | 1.02 |
| 0  | 3  | -10 | 13.36 | 1.46 |
| 0  | -3 | -10 | 8.02  | 1.39 |
| 0  | 3  | 10  | 9.58  | 0.76 |
| 0  | -3 | -10 | 10.77 | 1.19 |
| 0  | 3  | -10 | 10.96 | 1.12 |
| 0  | -3 | -10 | 9.03  | 1.22 |
| 0  | -3 | 10  | 10.80 | 0.77 |

## CIF S3

|    |    |     |       |      |
|----|----|-----|-------|------|
| 1  | 3  | -10 | 22.77 | 1.45 |
| -1 | -3 | -10 | 19.82 | 1.50 |
| -1 | 3  | 10  | 19.33 | 1.20 |
| 1  | 3  | -10 | 21.90 | 1.39 |
| 1  | -3 | 10  | 21.21 | 1.26 |
| -1 | 3  | 10  | 19.13 | 1.25 |
| -1 | -3 | 10  | 20.56 | 1.26 |
| 1  | 3  | 10  | 21.32 | 1.23 |
| -1 | 3  | -10 | 25.84 | 2.09 |
| 1  | -3 | -10 | 15.48 | 1.92 |
| -1 | 3  | -10 | 21.39 | 1.61 |
| 1  | -3 | -10 | 17.60 | 1.59 |
| 1  | -3 | -10 | 20.08 | 1.48 |
| -1 | 3  | -10 | 20.70 | 1.44 |
| 2  | -3 | 10  | 9.68  | 0.87 |
| 2  | 3  | -10 | 10.51 | 0.94 |
| 2  | 3  | -10 | 10.03 | 0.88 |
| -2 | 3  | 10  | 9.42  | 0.80 |
| -2 | -3 | -10 | 9.27  | 1.18 |
| -2 | -3 | 10  | 9.80  | 0.71 |
| -2 | -3 | 10  | 10.74 | 0.68 |
| 2  | -3 | -10 | 9.23  | 1.25 |
| -2 | -3 | 10  | 10.06 | 0.82 |
| -2 | 3  | -10 | 8.77  | 1.06 |
| -2 | 3  | -10 | 9.44  | 1.03 |
| 2  | 3  | 10  | 9.78  | 0.80 |
| 2  | -3 | -10 | 9.55  | 1.06 |
| 3  | 3  | -10 | 22.08 | 1.52 |
| -3 | 3  | 10  | 26.52 | 1.73 |
| 3  | -3 | 10  | 27.28 | 1.56 |
| -3 | -3 | -10 | 26.26 | 1.72 |
| -3 | 3  | 10  | 22.86 | 1.46 |
| -3 | 3  | 10  | 24.99 | 1.44 |
| 3  | 3  | -10 | 24.25 | 1.45 |
| -3 | -3 | -10 | 23.70 | 1.62 |
| 3  | 3  | -10 | 22.15 | 1.37 |
| -3 | -3 | 10  | 22.49 | 1.36 |
| 3  | -3 | -10 | 26.07 | 1.88 |
| -3 | 3  | -10 | 25.10 | 1.53 |
| -3 | 3  | -10 | 24.28 | 1.68 |
| 3  | -3 | -10 | 19.96 | 1.66 |

## CIF S3

|    |    |     |       |      |
|----|----|-----|-------|------|
| -3 | 3  | -10 | 22.06 | 1.70 |
| -3 | -3 | 10  | 23.95 | 1.21 |
| -3 | -3 | 10  | 24.24 | 1.30 |
| -3 | -3 | 10  | 23.17 | 1.44 |
| -3 | -3 | 10  | 24.86 | 1.21 |
| 3  | 3  | 10  | 23.81 | 1.43 |
| -4 | 3  | 10  | 5.35  | 0.79 |
| -4 | 3  | 10  | 5.60  | 1.01 |
| -4 | -3 | -10 | 5.56  | 1.04 |
| 4  | -3 | 10  | 5.59  | 0.85 |
| -4 | 3  | 10  | 5.82  | 0.62 |
| -4 | -3 | -10 | 4.94  | 1.08 |
| -4 | 3  | 10  | 5.03  | 1.00 |
| -4 | -3 | -10 | 6.36  | 0.83 |
| 4  | 3  | -10 | 4.98  | 0.58 |
| 4  | -3 | -10 | 6.22  | 0.91 |
| -4 | 3  | -10 | 6.83  | 1.08 |
| -4 | 3  | -10 | 6.54  | 0.91 |
| -4 | -3 | 10  | 5.76  | 0.57 |
| -4 | -3 | 10  | 6.74  | 0.52 |
| 4  | -3 | -10 | 6.07  | 1.25 |
| -4 | -3 | 10  | 5.82  | 0.91 |
| 4  | -3 | -10 | 6.23  | 1.12 |
| -4 | 3  | -10 | 6.63  | 1.33 |
| -5 | 3  | 10  | 8.15  | 0.85 |
| -5 | 3  | 10  | 7.57  | 0.73 |
| -5 | -3 | -10 | 8.58  | 0.92 |
| 5  | -3 | 10  | 9.31  | 1.10 |
| -5 | -3 | -10 | 6.86  | 1.18 |
| -5 | 3  | -10 | 8.37  | 1.19 |
| -5 | -3 | 10  | 7.81  | 1.06 |
| -5 | 3  | -10 | 10.28 | 1.12 |
| 5  | -3 | -10 | 8.01  | 1.15 |
| -5 | -3 | 10  | 8.15  | 0.96 |
| 5  | -3 | -10 | 8.51  | 1.32 |
| -5 | 3  | -10 | 10.05 | 1.31 |
| -5 | -3 | 10  | 8.31  | 0.58 |
| -6 | 3  | 10  | 1.75  | 0.43 |
| -6 | -3 | -10 | 3.98  | 0.87 |
| -6 | 3  | 10  | 2.06  | 0.50 |
| 6  | -3 | 10  | 2.64  | 0.90 |

## CIF S3

|    |    |     |      |      |
|----|----|-----|------|------|
| -6 | -3 | -10 | 2.22 | 1.51 |
| -6 | -3 | -10 | 2.01 | 0.65 |
| -6 | 3  | 10  | 2.87 | 0.58 |
| -6 | 3  | 10  | 3.44 | 0.83 |
| -6 | -3 | -10 | 0.42 | 1.18 |
| -6 | 3  | -10 | 2.39 | 1.19 |
| -6 | 3  | -10 | 3.58 | 0.74 |
| -6 | 3  | -10 | 3.76 | 1.01 |
| -7 | -3 | -10 | 2.92 | 0.79 |
| -7 | 3  | 10  | 1.93 | 0.46 |
| -7 | 3  | 10  | 2.16 | 0.35 |
| 7  | -3 | 10  | 1.84 | 0.59 |
| -7 | -3 | -10 | 1.36 | 0.90 |
| -7 | -3 | -10 | 1.98 | 0.73 |
| -7 | -3 | -10 | 1.82 | 0.59 |
| -7 | -3 | -10 | 0.78 | 1.02 |
| -7 | -3 | -10 | 0.96 | 0.50 |
| -7 | 3  | -10 | 2.24 | 0.40 |
| -7 | 3  | -10 | 2.07 | 0.64 |
| -7 | 3  | -10 | 1.40 | 0.58 |
| -7 | 3  | -10 | 3.49 | 1.04 |
| -8 | -3 | -10 | 1.77 | 0.54 |
| 8  | -3 | 10  | 1.07 | 0.52 |
| -8 | -3 | -10 | 1.43 | 0.51 |
| -8 | -3 | -10 | 1.99 | 0.77 |
| -8 | 3  | 10  | 1.28 | 0.28 |
| -8 | -3 | -10 | 1.30 | 0.49 |
| -8 | 3  | 10  | 1.78 | 0.30 |
| -8 | 3  | 10  | 1.65 | 0.30 |
| -8 | -3 | -10 | 1.16 | 0.44 |
| -8 | -3 | -10 | 0.77 | 0.95 |
| -8 | 3  | -10 | 1.31 | 0.51 |
| -8 | 3  | -10 | 1.20 | 0.86 |
| -8 | 3  | -10 | 1.21 | 0.51 |
| 8  | 3  | 10  | 1.56 | 0.53 |
| -9 | -3 | -10 | 2.37 | 0.52 |
| -9 | -3 | -10 | 2.12 | 0.55 |
| -9 | -3 | -10 | 0.47 | 0.61 |
| -9 | -3 | -10 | 1.01 | 0.36 |
| 9  | -3 | 10  | 1.92 | 0.58 |
| -9 | 3  | -10 | 2.52 | 0.55 |



## CIF S3

|    |    |     |       |      |
|----|----|-----|-------|------|
| -9 | 3  | -10 | 2.31  | 0.62 |
| 9  | 3  | 10  | 2.43  | 0.64 |
| -9 | 3  | -10 | 0.30  | 0.55 |
| -9 | 3  | -10 | 0.79  | 0.34 |
| 0  | 4  | -10 | 12.65 | 1.59 |
| 0  | -4 | -10 | 8.45  | 1.16 |
| 0  | 4  | -10 | 10.40 | 1.13 |
| 0  | 4  | -10 | 11.31 | 1.02 |
| 0  | 4  | 10  | 10.23 | 0.87 |
| 0  | -4 | -10 | 9.66  | 1.28 |
| 0  | -4 | 10  | 10.84 | 0.98 |
| 0  | -4 | 10  | 11.80 | 0.81 |
| 1  | 4  | -10 | 12.32 | 1.15 |
| 1  | -4 | 10  | 13.98 | 0.94 |
| -1 | 4  | 10  | 12.09 | 0.88 |
| 1  | 4  | -10 | 13.17 | 1.09 |
| -1 | 4  | 10  | 11.35 | 0.95 |
| 1  | -4 | -10 | 11.83 | 1.49 |
| 1  | 4  | 10  | 12.49 | 0.92 |
| 1  | 4  | 10  | 9.20  | 1.80 |
| -1 | -4 | 10  | 13.20 | 0.99 |
| 1  | -4 | -10 | 13.93 | 1.37 |
| -1 | 4  | -10 | 13.47 | 1.31 |
| -1 | 4  | -10 | 11.90 | 1.21 |
| -1 | 4  | -10 | 15.79 | 1.26 |
| -2 | 4  | 10  | 5.14  | 0.79 |
| -2 | -4 | -10 | 7.22  | 1.15 |
| 2  | -4 | 10  | 5.74  | 0.80 |
| 2  | 4  | -10 | 4.76  | 0.85 |
| 2  | 4  | -10 | 5.20  | 0.80 |
| -2 | -4 | 10  | 4.94  | 0.49 |
| -2 | -4 | 10  | 5.41  | 0.61 |
| -2 | -4 | 10  | 5.30  | 0.67 |
| 2  | -4 | -10 | 4.85  | 1.29 |
| -2 | 4  | -10 | 4.62  | 0.91 |
| -2 | 4  | -10 | 6.29  | 0.98 |
| -2 | -4 | 10  | 5.54  | 0.68 |
| 2  | 4  | 10  | 5.84  | 0.67 |
| 2  | -4 | -10 | 4.44  | 1.10 |
| -3 | -4 | -10 | 20.89 | 1.57 |
| -3 | 4  | 10  | 19.34 | 1.17 |

## CIF S3

|    |    |     |       |      |
|----|----|-----|-------|------|
| -3 | -4 | -10 | 21.02 | 1.48 |
| 3  | 4  | -10 | 18.79 | 1.26 |
| 3  | 4  | -10 | 17.83 | 1.33 |
| -3 | 4  | 10  | 21.07 | 1.57 |
| 3  | -4 | 10  | 19.42 | 1.35 |
| -3 | 4  | 10  | 19.11 | 1.28 |
| 3  | 4  | 10  | 17.68 | 1.24 |
| -3 | -4 | 10  | 19.51 | 1.11 |
| -3 | 4  | -10 | 18.31 | 1.40 |
| -3 | 4  | -10 | 20.20 | 1.55 |
| 3  | -4 | -10 | 16.68 | 1.70 |
| 3  | -4 | -10 | 18.07 | 1.65 |
| -3 | 4  | -10 | 20.58 | 1.67 |
| -3 | -4 | 10  | 19.06 | 0.97 |
| -3 | -4 | 10  | 19.62 | 1.30 |
| -3 | -4 | 10  | 18.29 | 1.16 |
| -4 | 4  | 10  | 7.66  | 0.79 |
| 4  | 4  | -10 | 7.89  | 0.68 |
| -4 | -4 | -10 | 7.18  | 1.08 |
| -4 | -4 | -10 | 6.60  | 0.95 |
| -4 | -4 | -10 | 6.34  | 1.13 |
| -4 | 4  | 10  | 7.28  | 0.88 |
| 4  | -4 | 10  | 7.09  | 1.11 |
| -4 | 4  | 10  | 8.30  | 1.15 |
| 4  | -4 | -10 | 6.02  | 1.24 |
| -4 | -4 | 10  | 7.54  | 1.00 |
| 4  | -4 | -10 | 6.23  | 1.36 |
| -4 | -4 | 10  | 7.89  | 0.87 |
| -4 | 4  | -10 | 7.14  | 1.36 |
| -4 | 4  | -10 | 6.88  | 1.15 |
| -4 | -4 | 10  | 6.75  | 0.64 |
| -4 | 4  | -10 | 7.49  | 0.97 |
| -4 | -4 | 10  | 7.22  | 0.60 |
| -5 | -4 | -10 | 19.62 | 1.57 |
| -5 | 4  | 10  | 17.18 | 1.22 |
| 5  | -4 | 10  | 18.02 | 1.36 |
| -5 | -4 | -10 | 11.80 | 1.42 |
| -5 | -4 | -10 | 17.82 | 1.21 |
| -5 | 4  | -10 | 16.76 | 1.68 |
| -5 | -4 | 10  | 19.07 | 1.46 |
| 5  | -4 | -10 | 14.77 | 1.48 |

## CIF S3

|    |    |     |       |      |
|----|----|-----|-------|------|
| -5 | 4  | -10 | 20.90 | 1.45 |
| -5 | 4  | -10 | 17.73 | 1.49 |
| -5 | -4 | 10  | 17.29 | 0.95 |
| -6 | 4  | 10  | 0.80  | 0.38 |
| -6 | -4 | -10 | 1.18  | 1.06 |
| -6 | 4  | 10  | 1.69  | 0.54 |
| -6 | 4  | 10  | 0.86  | 0.42 |
| -6 | 4  | 10  | 1.90  | 0.52 |
| -6 | -4 | -10 | 0.52  | 0.56 |
| -6 | 4  | 10  | 0.03  | 0.40 |
| -6 | -4 | -10 | 1.25  | 0.38 |
| -6 | 4  | 10  | 0.77  | 0.46 |
| -6 | -4 | -10 | 1.41  | 1.07 |
| -6 | -4 | -10 | 1.53  | 0.67 |
| 6  | -4 | 10  | 1.50  | 0.56 |
| -6 | 4  | -10 | 2.59  | 0.86 |
| -6 | 4  | -10 | 1.72  | 1.01 |
| -6 | 4  | -10 | 1.18  | 0.61 |
| -6 | 4  | -10 | 1.18  | 1.09 |
| -7 | -4 | -10 | 2.85  | 1.09 |
| -7 | -4 | -10 | 3.86  | 0.93 |
| 7  | -4 | 10  | 3.77  | 0.86 |
| -7 | -4 | -10 | 2.96  | 1.06 |
| -7 | 4  | 10  | 4.15  | 0.59 |
| -7 | 4  | 10  | 3.36  | 0.42 |
| -7 | -4 | -10 | 4.00  | 0.88 |
| -7 | 4  | 10  | 2.89  | 0.58 |
| -7 | -4 | -10 | 5.03  | 1.27 |
| -7 | -4 | -10 | 4.43  | 0.85 |
| -7 | -4 | -10 | 3.62  | 0.83 |
| -7 | 4  | -10 | 3.34  | 0.90 |
| -7 | 4  | -10 | 4.20  | 0.83 |
| -7 | 4  | -10 | 3.75  | 0.60 |
| -7 | 4  | -10 | 5.69  | 1.21 |
| -8 | -4 | -10 | 10.23 | 0.90 |
| -8 | -4 | -10 | 12.03 | 0.92 |
| -8 | 4  | 10  | 12.46 | 0.68 |
| 8  | -4 | 10  | 11.69 | 0.97 |
| -8 | 4  | 10  | 10.84 | 0.71 |
| -8 | -4 | -10 | 11.48 | 1.36 |
| -8 | -4 | -10 | 12.34 | 0.95 |

## CIF S3

|    |    |     |       |      |
|----|----|-----|-------|------|
| -8 | -4 | -10 | 10.47 | 0.93 |
| -8 | 4  | -10 | 10.74 | 0.91 |
| -8 | 4  | -10 | 11.79 | 0.93 |
| 8  | 4  | 10  | 11.07 | 0.99 |
| -8 | 4  | -10 | 11.90 | 1.26 |
| -9 | -4 | -10 | 2.65  | 0.55 |
| -9 | -4 | -10 | 1.20  | 0.56 |
| -9 | -4 | -10 | 2.86  | 0.64 |
| -9 | -4 | -10 | 2.36  | 0.55 |
| 9  | -4 | 10  | 2.83  | 0.52 |
| -9 | 4  | -10 | 3.12  | 0.59 |
| 9  | 4  | 10  | 3.56  | 0.64 |
| -9 | 4  | -10 | 2.30  | 0.53 |
| -9 | 4  | -10 | 1.37  | 0.54 |
| -9 | 4  | -10 | 3.43  | 0.51 |
| 0  | 5  | -10 | 1.09  | 0.67 |
| 0  | -5 | 10  | 1.82  | 0.68 |
| 0  | -5 | 10  | 1.16  | 0.76 |
| 0  | -5 | 10  | 1.11  | 0.55 |
| 0  | 5  | -10 | 2.03  | 0.82 |
| 0  | -5 | -10 | 1.16  | 0.96 |
| 0  | -5 | 10  | 0.70  | 0.46 |
| 0  | 5  | 10  | 1.10  | 0.50 |
| 1  | -5 | 10  | 0.62  | 0.63 |
| -1 | -5 | -10 | 0.38  | 0.90 |
| -1 | 5  | 10  | -0.25 | 0.39 |
| 1  | -5 | 10  | 0.35  | 0.56 |
| 1  | 5  | -10 | 0.43  | 0.69 |
| 1  | 5  | -10 | -0.19 | 0.56 |
| -1 | -5 | 10  | 0.23  | 0.49 |
| -1 | -5 | 10  | -0.06 | 0.58 |
| -1 | 5  | -10 | 0.15  | 0.71 |
| 1  | 5  | 10  | 0.18  | 0.46 |
| -1 | 5  | -10 | 0.46  | 0.79 |
| 1  | -5 | -10 | -0.39 | 1.09 |
| -1 | 5  | -10 | -0.13 | 0.70 |
| 1  | -5 | -10 | -0.56 | 1.06 |
| -2 | 5  | 10  | 25.03 | 1.44 |
| 2  | 5  | -10 | 26.67 | 1.73 |
| -2 | 5  | 10  | 23.88 | 1.57 |
| 2  | 5  | -10 | 26.49 | 1.64 |

## CIF S3

|    |    |     |       |      |
|----|----|-----|-------|------|
| -2 | -5 | -10 | 26.75 | 1.84 |
| -2 | 5  | 10  | 24.06 | 1.47 |
| 2  | -5 | 10  | 26.00 | 1.54 |
| 2  | -5 | 10  | 27.60 | 1.57 |
| -2 | 5  | -10 | 24.01 | 1.76 |
| -2 | -5 | 10  | 26.92 | 1.37 |
| 2  | 5  | 10  | 25.44 | 1.52 |
| -2 | -5 | 10  | 26.17 | 1.52 |
| 2  | -5 | -10 | 20.20 | 1.81 |
| 2  | -5 | -10 | 19.44 | 1.93 |
| -2 | -5 | 10  | 24.49 | 1.42 |
| -2 | -5 | 10  | 25.57 | 1.49 |
| -2 | 5  | -10 | 27.40 | 1.80 |
| -3 | 5  | 10  | 7.12  | 0.93 |
| -3 | 5  | 10  | 7.28  | 0.80 |
| 3  | -5 | 10  | 7.65  | 0.96 |
| 3  | 5  | -10 | 7.22  | 0.93 |
| -3 | -5 | -10 | 6.25  | 1.21 |
| 3  | 5  | -10 | 6.91  | 0.85 |
| -3 | -5 | -10 | 7.50  | 1.04 |
| 3  | -5 | -10 | 8.12  | 1.31 |
| 3  | -5 | -10 | 6.22  | 1.43 |
| -3 | 5  | -10 | 6.93  | 1.19 |
| 3  | 5  | 10  | 8.67  | 0.91 |
| -3 | -5 | 10  | 7.98  | 0.66 |
| -3 | 5  | -10 | 9.08  | 1.23 |
| -3 | 5  | -10 | 8.51  | 0.96 |
| -3 | -5 | 10  | 8.19  | 0.82 |
| -3 | -5 | 10  | 8.04  | 0.46 |
| -3 | -5 | 10  | 7.46  | 0.63 |
| -3 | -5 | 10  | 8.14  | 0.78 |
| -3 | -5 | 10  | 5.79  | 1.04 |
| 4  | -5 | 10  | 25.23 | 1.66 |
| -4 | 5  | 10  | 26.33 | 1.56 |
| -4 | 5  | 10  | 26.75 | 1.48 |
| -4 | -5 | -10 | 24.66 | 1.55 |
| -4 | -5 | -10 | 24.35 | 1.66 |
| -4 | 5  | -10 | 23.02 | 1.87 |
| -4 | -5 | 10  | 25.98 | 1.35 |
| -4 | -5 | 10  | 24.15 | 1.52 |
| 4  | -5 | -10 | 19.37 | 1.87 |

## CIF S3

|    |    |     |       |      |
|----|----|-----|-------|------|
| -4 | -5 | 10  | 24.87 | 1.38 |
| -4 | -5 | 10  | 25.60 | 1.59 |
| 4  | -5 | -10 | 17.34 | 2.02 |
| -4 | 5  | -10 | 26.90 | 1.84 |
| -4 | -5 | 10  | 23.90 | 1.63 |
| -4 | 5  | -10 | 23.99 | 1.65 |
| -5 | -5 | -10 | 24.73 | 1.81 |
| -5 | -5 | -10 | 23.31 | 1.79 |
| 5  | -5 | 10  | 25.75 | 1.70 |
| -5 | -5 | -10 | 26.11 | 1.63 |
| -5 | 5  | -10 | 25.34 | 1.81 |
| -5 | -5 | 10  | 25.45 | 1.34 |
| -5 | -5 | 10  | 23.75 | 1.73 |
| -5 | 5  | -10 | 24.17 | 1.68 |
| -6 | -5 | -10 | 3.48  | 0.84 |
| 6  | -5 | 10  | 2.97  | 0.57 |
| -6 | 5  | 10  | 3.73  | 0.76 |
| -6 | 5  | 10  | 2.49  | 0.53 |
| -6 | -5 | -10 | 2.66  | 0.65 |
| -6 | -5 | -10 | 3.30  | 1.10 |
| -6 | 5  | 10  | 1.56  | 0.49 |
| -6 | -5 | -10 | 2.01  | 0.65 |
| -6 | -5 | -10 | 2.09  | 1.11 |
| -6 | 5  | 10  | 3.91  | 0.84 |
| -6 | -5 | 10  | 3.33  | 0.97 |
| -6 | 5  | -10 | 2.04  | 0.95 |
| -6 | 5  | -10 | 2.29  | 1.24 |
| -6 | 5  | -10 | 2.62  | 0.67 |
| -6 | 5  | -10 | 2.10  | 0.99 |
| -7 | -5 | -10 | 0.63  | 1.01 |
| -7 | -5 | -10 | 0.54  | 0.60 |
| -7 | -5 | -10 | 0.07  | 0.52 |
| 7  | -5 | 10  | 0.47  | 0.49 |
| -7 | 5  | 10  | 1.09  | 0.39 |
| -7 | 5  | 10  | 1.02  | 0.45 |
| -7 | -5 | -10 | 0.39  | 0.54 |
| -7 | -5 | -10 | -0.63 | 1.03 |
| -7 | 5  | 10  | 0.48  | 0.32 |
| -7 | -5 | -10 | 0.86  | 0.53 |
| -7 | -5 | -10 | -0.27 | 0.49 |
| -7 | 5  | -10 | 0.77  | 0.38 |

## CIF S3

|    |    |     |       |      |
|----|----|-----|-------|------|
| -7 | 5  | -10 | 0.96  | 0.60 |
| 7  | 5  | 10  | -0.02 | 0.60 |
| -7 | 5  | -10 | 0.67  | 0.94 |
| -7 | 5  | -10 | 1.21  | 0.59 |
| -8 | -5 | -10 | 4.58  | 0.75 |
| -8 | 5  | 10  | 3.59  | 0.48 |
| -8 | 5  | 10  | 5.10  | 0.47 |
| -8 | -5 | -10 | 4.33  | 0.80 |
| -8 | -5 | -10 | 5.57  | 0.67 |
| -8 | -5 | -10 | 4.48  | 0.77 |
| -8 | -5 | -10 | 4.65  | 1.19 |
| 8  | -5 | 10  | 4.77  | 0.73 |
| -8 | 5  | -10 | 4.66  | 0.73 |
| 8  | 5  | 10  | 5.70  | 0.82 |
| -8 | 5  | -10 | 5.24  | 1.02 |
| -8 | 5  | -10 | 3.65  | 0.70 |
| -9 | -5 | -10 | 0.07  | 0.31 |
| -9 | -5 | -10 | 0.28  | 0.29 |
| 9  | -5 | 10  | 0.75  | 0.38 |
| -9 | 5  | -10 | 0.61  | 0.29 |
| 9  | 5  | 10  | 0.63  | 0.31 |
| -9 | 5  | -10 | 0.61  | 0.32 |
| 9  | 5  | 10  | 0.62  | 0.28 |
| 0  | 6  | -10 | 13.68 | 1.25 |
| 0  | -6 | 10  | 11.59 | 0.91 |
| 0  | -6 | 10  | 10.65 | 1.04 |
| 0  | 6  | -10 | 12.58 | 1.30 |
| 0  | 6  | 10  | 12.13 | 1.09 |
| 0  | -6 | 10  | 11.91 | 1.19 |
| 0  | -6 | 10  | 11.19 | 0.95 |
| 0  | 6  | 10  | 11.70 | 0.97 |
| 1  | -6 | 10  | 0.71  | 0.87 |
| 1  | -6 | 10  | -0.38 | 0.62 |
| 1  | -6 | 10  | -0.37 | 0.57 |
| -1 | 6  | 10  | 0.01  | 0.48 |
| 1  | 6  | -10 | 0.13  | 0.66 |
| -1 | -6 | -10 | -0.53 | 1.02 |
| 1  | -6 | 10  | -0.23 | 0.57 |
| 1  | 6  | -10 | -0.34 | 0.72 |
| -1 | 6  | 10  | -0.51 | 0.54 |
| 1  | 6  | 10  | -0.35 | 0.51 |

## CIF S3

|    |    |     |       |      |
|----|----|-----|-------|------|
| -1 | 6  | -10 | 0.40  | 0.80 |
| 1  | -6 | -10 | -0.06 | 1.16 |
| -1 | -6 | 10  | 1.16  | 0.66 |
| -1 | -6 | 10  | -0.24 | 0.63 |
| -1 | 6  | -10 | 0.31  | 0.79 |
| -1 | 6  | -10 | 0.27  | 0.68 |
| -1 | -6 | 10  | 0.09  | 0.52 |
| -1 | -6 | 10  | -0.24 | 0.59 |
| -2 | 6  | 10  | 5.87  | 0.77 |
| 2  | 6  | -10 | 5.03  | 0.95 |
| 2  | -6 | 10  | 4.62  | 0.81 |
| -2 | -6 | -10 | 5.54  | 1.32 |
| 2  | -6 | 10  | 4.64  | 0.81 |
| 2  | -6 | 10  | 5.29  | 0.86 |
| 2  | 6  | -10 | 5.95  | 0.85 |
| -2 | 6  | 10  | 4.74  | 0.75 |
| -2 | 6  | 10  | 4.24  | 0.98 |
| 2  | -6 | -10 | 4.49  | 1.31 |
| 2  | -6 | -10 | 4.55  | 1.28 |
| -2 | 6  | -10 | 5.76  | 1.08 |
| -2 | -6 | 10  | 5.72  | 0.54 |
| -2 | -6 | 10  | 4.85  | 0.74 |
| -2 | -6 | 10  | 3.77  | 0.67 |
| 2  | 6  | 10  | 5.07  | 0.76 |
| -2 | -6 | 10  | 5.67  | 0.81 |
| 3  | -6 | 10  | 1.26  | 0.72 |
| 3  | 6  | -10 | 3.17  | 0.76 |
| 3  | -6 | 10  | 3.08  | 0.82 |
| -3 | -6 | -10 | 1.59  | 1.00 |
| -3 | 6  | 10  | 2.04  | 0.70 |
| -3 | 6  | 10  | 2.00  | 0.61 |
| 3  | 6  | -10 | 2.74  | 0.86 |
| -3 | 6  | -10 | 3.58  | 1.09 |
| -3 | -6 | 10  | 2.96  | 0.58 |
| 3  | 6  | 10  | 1.62  | 0.61 |
| -3 | 6  | -10 | 3.94  | 0.86 |
| -3 | -6 | 10  | 3.66  | 0.73 |
| 3  | -6 | -10 | 1.85  | 1.40 |
| -3 | -6 | 10  | 2.65  | 0.69 |
| -3 | -6 | 10  | 2.93  | 0.29 |
| -3 | -6 | 10  | 3.93  | 0.55 |



## CIF S3

|    |    |     |       |      |
|----|----|-----|-------|------|
| -3 | -6 | 10  | 2.76  | 0.89 |
| 3  | -6 | -10 | 1.25  | 1.21 |
| -4 | -6 | -10 | 15.99 | 1.42 |
| -4 | 6  | 10  | 19.09 | 1.38 |
| -4 | -6 | -10 | 19.06 | 1.43 |
| -4 | 6  | 10  | 17.51 | 1.22 |
| 4  | -6 | 10  | 18.88 | 1.43 |
| -4 | -6 | 10  | 18.34 | 1.11 |
| -4 | 6  | -10 | 18.10 | 1.42 |
| -4 | -6 | 10  | 19.92 | 1.58 |
| -4 | 6  | -10 | 17.21 | 1.68 |
| 4  | -6 | -10 | 14.50 | 1.73 |
| -4 | -6 | 10  | 18.32 | 1.10 |
| -4 | 6  | -10 | 21.17 | 1.64 |
| -4 | -6 | 10  | 17.76 | 1.36 |
| 5  | -6 | 10  | 3.99  | 1.01 |
| -5 | -6 | -10 | 4.94  | 1.14 |
| -5 | -6 | -10 | 3.12  | 1.23 |
| -5 | 6  | 10  | 4.22  | 0.90 |
| -5 | -6 | -10 | 2.41  | 0.69 |
| 5  | -6 | 10  | 3.50  | 0.81 |
| -5 | 6  | 10  | 3.35  | 0.75 |
| -5 | 6  | 10  | 3.75  | 0.85 |
| -5 | -6 | -10 | 5.00  | 1.15 |
| -5 | -6 | -10 | 4.47  | 0.89 |
| -5 | 6  | 10  | 4.75  | 0.96 |
| -5 | -6 | -10 | 3.89  | 0.86 |
| -5 | 6  | 10  | 3.43  | 0.93 |
| -5 | -6 | -10 | 5.08  | 1.04 |
| -5 | -6 | 10  | 5.27  | 1.20 |
| -5 | 6  | -10 | 4.59  | 1.10 |
| -5 | 6  | -10 | 2.56  | 0.79 |
| -5 | -6 | 10  | 3.72  | 0.46 |
| -5 | -6 | 10  | 4.34  | 0.91 |
| -5 | -6 | 10  | 3.78  | 0.44 |
| 5  | 6  | 10  | 4.51  | 0.95 |
| -5 | 6  | -10 | 2.56  | 0.94 |
| 5  | 6  | 10  | 3.10  | 0.77 |
| -6 | -6 | -10 | 4.51  | 0.97 |
| -6 | -6 | -10 | 4.88  | 1.47 |
| -6 | 6  | 10  | 3.20  | 0.85 |

## CIF S3

|    |    |     |       |      |
|----|----|-----|-------|------|
| -6 | 6  | 10  | 4.08  | 0.86 |
| 6  | -6 | 10  | 4.05  | 0.79 |
| -6 | 6  | 10  | 4.28  | 0.81 |
| -6 | -6 | -10 | 5.37  | 0.92 |
| -6 | -6 | -10 | 5.51  | 1.19 |
| -6 | -6 | -10 | 3.28  | 1.11 |
| -6 | 6  | 10  | 4.90  | 0.88 |
| -6 | -6 | -10 | 3.72  | 0.96 |
| 6  | 6  | 10  | 4.02  | 0.77 |
| -6 | -6 | 10  | 4.86  | 1.07 |
| -6 | 6  | -10 | 4.31  | 0.99 |
| -6 | 6  | -10 | 2.55  | 1.17 |
| 6  | 6  | 10  | 3.90  | 0.93 |
| -7 | -6 | -10 | 1.45  | 1.00 |
| -7 | -6 | -10 | 0.31  | 0.58 |
| -7 | -6 | -10 | 0.52  | 0.57 |
| -7 | -6 | -10 | 0.64  | 0.41 |
| -7 | 6  | 10  | -0.54 | 0.44 |
| 7  | -6 | 10  | 0.36  | 0.41 |
| -7 | 6  | 10  | 0.11  | 0.38 |
| -7 | 6  | 10  | 0.37  | 0.36 |
| -7 | -6 | -10 | 1.14  | 1.00 |
| -7 | -6 | -10 | 0.42  | 0.59 |
| -7 | -6 | -10 | 0.60  | 0.47 |
| -7 | 6  | -10 | 0.54  | 0.32 |
| 7  | 6  | 10  | 0.09  | 0.49 |
| -7 | 6  | -10 | 0.02  | 0.54 |
| -7 | 6  | -10 | 0.76  | 0.58 |
| -7 | 6  | -10 | 1.01  | 0.85 |
| 7  | 6  | 10  | -0.13 | 0.42 |
| -8 | -6 | -10 | 0.12  | 0.41 |
| -8 | -6 | -10 | 0.51  | 0.43 |
| -8 | 6  | 10  | -0.12 | 0.24 |
| -8 | -6 | -10 | 0.41  | 0.60 |
| -8 | -6 | -10 | 0.34  | 0.39 |
| 8  | -6 | 10  | 0.00  | 0.33 |
| -8 | 6  | 10  | 0.20  | 0.42 |
| 8  | 6  | 10  | 0.64  | 0.40 |
| -8 | 6  | -10 | -1.28 | 0.95 |
| 8  | 6  | 10  | 0.17  | 0.35 |
| -8 | 6  | -10 | 0.00  | 0.45 |

## CIF S3

|    |    |     |       |      |
|----|----|-----|-------|------|
| 0  | 7  | 10  | 9.91  | 1.01 |
| 0  | -7 | 10  | 11.07 | 0.98 |
| 0  | -7 | 10  | 9.79  | 0.91 |
| 0  | -7 | 10  | 10.72 | 1.06 |
| 0  | 7  | -10 | 11.47 | 1.41 |
| 0  | -7 | 10  | 12.08 | 1.19 |
| 0  | 7  | -10 | 12.39 | 1.29 |
| 1  | 7  | -10 | 5.57  | 1.14 |
| 1  | -7 | 10  | 5.18  | 0.81 |
| -1 | -7 | -10 | 6.09  | 1.25 |
| 1  | -7 | 10  | 5.39  | 0.87 |
| 1  | 7  | -10 | 7.35  | 1.04 |
| 1  | -7 | 10  | 7.05  | 0.95 |
| -1 | 7  | 10  | 4.96  | 0.88 |
| 1  | -7 | 10  | 5.21  | 1.19 |
| -1 | 7  | 10  | 6.12  | 0.92 |
| -1 | -7 | 10  | 4.94  | 0.81 |
| -1 | -7 | 10  | 5.65  | 1.08 |
| 1  | 7  | 10  | 4.45  | 0.77 |
| -1 | -7 | 10  | 5.54  | 0.92 |
| -1 | 7  | -10 | 5.61  | 1.06 |
| 1  | -7 | -10 | 6.26  | 1.55 |
| -1 | 7  | -10 | 5.58  | 1.18 |
| -1 | -7 | 10  | 5.21  | 0.83 |
| 2  | -7 | 10  | 2.84  | 0.81 |
| 2  | -7 | 10  | 4.60  | 1.00 |
| -2 | 7  | 10  | 4.69  | 0.81 |
| 2  | -7 | 10  | 3.48  | 1.04 |
| -2 | -7 | -10 | 1.23  | 1.00 |
| -2 | 7  | 10  | 4.12  | 0.77 |
| 2  | 7  | -10 | 3.72  | 0.87 |
| 2  | 7  | -10 | 2.85  | 0.99 |
| 2  | -7 | 10  | 3.20  | 0.84 |
| -2 | -7 | 10  | 3.94  | 0.52 |
| -2 | -7 | 10  | 3.64  | 0.88 |
| 2  | 7  | 10  | 2.59  | 0.74 |
| -2 | -7 | 10  | 3.44  | 0.75 |
| -2 | -7 | 10  | 3.41  | 0.91 |
| 2  | -7 | -10 | 3.98  | 1.39 |
| -2 | -7 | 10  | 3.70  | 0.65 |
| -2 | 7  | -10 | 1.23  | 0.83 |

## CIF S3

|    |    |     |      |      |
|----|----|-----|------|------|
| 3  | -7 | 10  | 7.74 | 0.94 |
| -3 | -7 | -10 | 4.72 | 1.32 |
| 3  | 7  | -10 | 7.71 | 0.92 |
| 3  | -7 | 10  | 6.28 | 1.03 |
| -3 | 7  | 10  | 6.21 | 0.94 |
| 3  | -7 | 10  | 9.28 | 1.52 |
| -3 | 7  | 10  | 6.76 | 1.06 |
| -3 | -7 | 10  | 6.73 | 0.79 |
| -3 | -7 | 10  | 7.26 | 0.84 |
| -3 | -7 | 10  | 6.21 | 0.86 |
| -3 | 7  | -10 | 6.01 | 1.00 |
| -3 | -7 | 10  | 8.20 | 0.67 |
| -3 | 7  | -10 | 5.75 | 1.25 |
| 3  | -7 | -10 | 1.93 | 1.31 |
| -3 | -7 | 10  | 7.71 | 1.17 |
| 3  | 7  | 10  | 6.29 | 0.95 |
| -4 | 7  | 10  | 1.39 | 0.66 |
| -4 | -7 | -10 | 2.35 | 1.06 |
| -4 | 7  | 10  | 1.56 | 0.61 |
| -4 | 7  | 10  | 1.26 | 1.03 |
| -4 | -7 | -10 | 1.62 | 0.74 |
| -4 | 7  | 10  | 0.51 | 0.75 |
| -4 | -7 | -10 | 2.06 | 1.01 |
| -4 | 7  | 10  | 0.61 | 0.78 |
| -4 | -7 | -10 | 2.88 | 0.96 |
| 4  | -7 | 10  | 2.27 | 1.04 |
| 4  | -7 | 10  | 1.88 | 0.80 |
| -4 | 7  | 10  | 2.28 | 0.69 |
| -4 | -7 | 10  | 1.69 | 0.47 |
| -4 | -7 | 10  | 2.22 | 0.84 |
| -4 | -7 | 10  | 1.74 | 0.54 |
| 4  | 7  | 10  | 1.32 | 0.59 |
| -4 | 7  | -10 | 1.46 | 0.79 |
| -4 | 7  | -10 | 2.78 | 0.96 |
| 4  | 7  | 10  | 1.73 | 0.71 |
| -4 | -7 | 10  | 1.31 | 0.51 |
| -4 | -7 | 10  | 1.20 | 0.40 |
| -4 | -7 | 10  | 3.95 | 1.02 |
| -5 | -7 | -10 | 4.06 | 1.15 |
| -5 | 7  | 10  | 4.03 | 0.99 |
| -5 | -7 | -10 | 4.67 | 1.05 |

## CIF S3

|    |    |     |       |      |
|----|----|-----|-------|------|
| -5 | -7 | -10 | 2.96  | 0.77 |
| -5 | 7  | 10  | 4.42  | 0.88 |
| 5  | -7 | 10  | 3.41  | 1.05 |
| -5 | 7  | 10  | 4.76  | 0.91 |
| -5 | 7  | 10  | 4.94  | 0.83 |
| -5 | -7 | -10 | 3.02  | 0.94 |
| -5 | 7  | 10  | 3.19  | 0.81 |
| -5 | -7 | -10 | 3.29  | 0.82 |
| -5 | -7 | 10  | 4.63  | 0.48 |
| -5 | 7  | -10 | 3.24  | 0.87 |
| 5  | 7  | 10  | 4.81  | 0.97 |
| 5  | 7  | 10  | 4.17  | 0.78 |
| -5 | -7 | 10  | 3.70  | 0.86 |
| -5 | -7 | 10  | 4.46  | 0.49 |
| -6 | 7  | 10  | 4.94  | 0.82 |
| -6 | -7 | -10 | 5.68  | 1.16 |
| 6  | -7 | 10  | 5.67  | 0.94 |
| -6 | -7 | -10 | 4.90  | 0.90 |
| -6 | -7 | -10 | 5.48  | 0.91 |
| -6 | -7 | -10 | 4.09  | 1.08 |
| -6 | 7  | 10  | 3.78  | 0.91 |
| -6 | -7 | -10 | 5.41  | 0.98 |
| -6 | -7 | -10 | 4.93  | 0.98 |
| -6 | -7 | -10 | 3.34  | 0.99 |
| -6 | 7  | 10  | 7.19  | 1.57 |
| 6  | 7  | 10  | 3.35  | 0.75 |
| 6  | 7  | 10  | 5.51  | 0.92 |
| -6 | 7  | -10 | 7.21  | 1.30 |
| -6 | -7 | 10  | 4.28  | 1.06 |
| -6 | 7  | -10 | 3.54  | 1.16 |
| -7 | -7 | -10 | 10.65 | 0.88 |
| -7 | 7  | 10  | 9.66  | 0.80 |
| -7 | -7 | -10 | 9.39  | 1.26 |
| -7 | -7 | -10 | 10.39 | 1.00 |
| -7 | -7 | -10 | 6.89  | 0.86 |
| -7 | 7  | 10  | 9.12  | 0.68 |
| -7 | 7  | 10  | 10.66 | 0.73 |
| -7 | 7  | -10 | 10.72 | 0.68 |
| 7  | 7  | 10  | 9.64  | 0.82 |
| -7 | 7  | -10 | 8.09  | 0.91 |
| -7 | 7  | -10 | 10.56 | 0.94 |

## CIF S3

|    |    |     |       |      |
|----|----|-----|-------|------|
| 7  | 7  | 10  | 9.45  | 0.94 |
| -7 | 7  | -10 | 5.86  | 1.40 |
| -8 | -7 | -10 | 4.41  | 0.57 |
| -8 | 7  | 10  | 4.71  | 0.46 |
| -8 | -7 | -10 | 4.89  | 0.63 |
| -8 | 7  | -10 | 4.03  | 0.64 |
| 8  | 7  | 10  | 5.44  | 0.70 |
| 8  | 7  | 10  | 5.34  | 0.55 |
| 0  | -8 | 10  | 1.28  | 0.75 |
| 0  | 8  | 10  | 1.40  | 0.69 |
| 0  | 8  | -10 | 1.48  | 0.90 |
| 0  | -8 | 10  | 1.17  | 0.67 |
| 0  | -8 | 10  | 0.49  | 0.61 |
| 0  | -8 | 10  | 1.29  | 0.85 |
| 0  | -8 | 10  | 1.40  | 0.79 |
| 1  | -8 | 10  | 38.93 | 2.15 |
| -1 | 8  | 10  | 36.73 | 2.16 |
| 1  | 8  | -10 | 33.62 | 2.31 |
| 1  | -8 | 10  | 35.88 | 2.26 |
| 1  | -8 | 10  | 41.59 | 2.18 |
| -1 | -8 | -10 | 38.97 | 2.56 |
| 1  | -8 | 10  | 38.03 | 2.12 |
| -1 | 8  | 10  | 39.83 | 2.11 |
| -1 | -8 | 10  | 37.85 | 2.18 |
| 1  | 8  | 10  | 35.62 | 2.14 |
| -1 | 8  | -10 | 34.06 | 2.39 |
| -1 | 8  | -10 | 34.03 | 2.39 |
| -1 | -8 | 10  | 37.23 | 2.03 |
| -1 | -8 | 10  | 37.71 | 2.20 |
| -1 | -8 | 10  | 36.65 | 1.95 |
| -1 | -8 | 10  | 38.34 | 2.19 |
| -2 | 8  | 10  | 9.23  | 1.05 |
| -2 | 8  | 10  | 8.58  | 0.93 |
| 2  | -8 | 10  | 8.95  | 1.10 |
| -2 | -8 | -10 | 4.93  | 1.43 |
| 2  | -8 | 10  | 10.27 | 1.18 |
| 2  | -8 | 10  | 8.47  | 1.06 |
| 2  | 8  | -10 | 8.90  | 1.42 |
| 2  | -8 | 10  | 9.23  | 1.31 |
| -2 | -8 | 10  | 7.51  | 0.88 |
| -2 | -8 | 10  | 7.59  | 0.81 |

## CIF S3

|    |    |     |       |      |
|----|----|-----|-------|------|
| -2 | -8 | 10  | 9.55  | 0.98 |
| -2 | 8  | -10 | 5.54  | 1.38 |
| -2 | -8 | 10  | 8.33  | 1.07 |
| 2  | -8 | -10 | 3.29  | 1.44 |
| 2  | 8  | 10  | 5.87  | 0.91 |
| -2 | -8 | 10  | 8.23  | 0.68 |
| 3  | -8 | 10  | 6.10  | 1.28 |
| -3 | 8  | 10  | 7.81  | 1.18 |
| 3  | -8 | 10  | 9.47  | 1.22 |
| 3  | -8 | 10  | 12.81 | 1.47 |
| -3 | -8 | -10 | 8.40  | 0.93 |
| -3 | 8  | 10  | 7.72  | 1.07 |
| 3  | -8 | 10  | 8.44  | 1.43 |
| -3 | -8 | -10 | 8.47  | 1.30 |
| 3  | -8 | 10  | 6.99  | 1.10 |
| -3 | 8  | 10  | 10.06 | 1.27 |
| -3 | 8  | 10  | 9.06  | 1.03 |
| 3  | -8 | 10  | 8.22  | 1.47 |
| -3 | 8  | 10  | 6.59  | 0.47 |
| -3 | -8 | -10 | 7.97  | 1.33 |
| -3 | 8  | 10  | 7.76  | 0.97 |
| -3 | -8 | 10  | 9.84  | 0.87 |
| -3 | -8 | 10  | 8.28  | 0.86 |
| -3 | -8 | 10  | 7.57  | 0.95 |
| 3  | 8  | 10  | 7.18  | 0.93 |
| -3 | -8 | 10  | 5.94  | 0.95 |
| -4 | 8  | 10  | 20.74 | 1.54 |
| -4 | -8 | -10 | 20.72 | 1.53 |
| -4 | 8  | 10  | 22.62 | 1.44 |
| -4 | 8  | 10  | 20.95 | 1.52 |
| -4 | 8  | 10  | 24.25 | 1.61 |
| -4 | 8  | 10  | 21.57 | 1.39 |
| 4  | -8 | 10  | 19.77 | 1.59 |
| 4  | -8 | 10  | 18.17 | 1.45 |
| -4 | -8 | -10 | 19.89 | 1.77 |
| 4  | -8 | 10  | 22.26 | 1.79 |
| -4 | -8 | -10 | 22.53 | 1.80 |
| -4 | 8  | 10  | 22.47 | 1.48 |
| -4 | -8 | -10 | 20.12 | 1.67 |
| -4 | 8  | 10  | 22.56 | 1.57 |
| -4 | -8 | -10 | 20.27 | 1.59 |

## CIF S3

|    |    |     |       |      |
|----|----|-----|-------|------|
| -4 | -8 | 10  | 20.27 | 1.19 |
| -4 | 8  | -10 | 16.14 | 1.64 |
| 4  | 8  | 10  | 20.42 | 1.34 |
| -4 | -8 | 10  | 22.45 | 1.39 |
| -4 | 8  | -10 | 19.89 | 1.99 |
| -4 | -8 | 10  | 20.85 | 1.58 |
| 4  | 8  | 10  | 20.95 | 1.45 |
| -4 | -8 | 10  | 21.48 | 1.22 |
| -4 | -8 | 10  | 21.19 | 1.27 |
| -5 | -8 | -10 | -0.28 | 1.06 |
| -5 | -8 | -10 | 0.14  | 0.69 |
| -5 | 8  | 10  | 0.68  | 0.62 |
| -5 | 8  | 10  | -0.28 | 0.57 |
| -5 | 8  | 10  | 1.75  | 0.62 |
| -5 | 8  | 10  | 0.17  | 0.55 |
| 5  | -8 | 10  | -0.22 | 0.93 |
| -5 | -8 | -10 | -0.27 | 0.85 |
| -5 | -8 | -10 | 0.70  | 0.69 |
| -5 | -8 | -10 | 0.37  | 0.71 |
| -5 | 8  | 10  | 0.55  | 0.70 |
| -5 | -8 | -10 | 0.49  | 0.45 |
| -5 | 8  | 10  | 1.81  | 0.77 |
| -5 | 8  | 10  | 0.79  | 0.57 |
| -5 | -8 | 10  | 0.63  | 0.32 |
| -5 | 8  | -10 | -0.46 | 0.82 |
| -5 | -8 | 10  | 1.23  | 0.74 |
| 5  | 8  | 10  | 0.55  | 0.53 |
| 5  | 8  | 10  | 0.64  | 0.49 |
| -6 | 8  | 10  | -0.05 | 0.54 |
| -6 | 8  | 10  | 0.37  | 0.55 |
| -6 | -8 | -10 | 0.34  | 0.49 |
| -6 | -8 | -10 | 0.55  | 0.61 |
| -6 | 8  | 10  | 0.67  | 0.48 |
| -6 | 8  | 10  | 0.72  | 0.47 |
| -6 | -8 | -10 | -0.02 | 0.90 |
| -6 | -8 | -10 | 0.53  | 0.57 |
| -6 | -8 | -10 | 0.20  | 0.40 |
| -6 | 8  | -10 | -1.11 | 0.58 |
| -6 | 8  | -10 | -0.44 | 0.91 |
| -6 | -8 | 10  | -1.36 | 0.75 |
| 6  | 8  | 10  | 0.28  | 0.49 |



## CIF S3

|    |    |     |       |      |
|----|----|-----|-------|------|
| 6  | 8  | 10  | 0.18  | 0.44 |
| -7 | 8  | 10  | 0.61  | 0.37 |
| -7 | -8 | -10 | 0.36  | 0.36 |
| -7 | 8  | 10  | 0.56  | 0.26 |
| -7 | -8 | -10 | 1.15  | 0.47 |
| -7 | 8  | 10  | 0.68  | 0.31 |
| -7 | 8  | 10  | 0.59  | 0.58 |
| -7 | -8 | -10 | 0.38  | 0.44 |
| 7  | 8  | 10  | -0.02 | 0.42 |
| -7 | 8  | -10 | -0.43 | 0.74 |
| 7  | 8  | 10  | 0.79  | 0.40 |
| -8 | 8  | -10 | 0.93  | 0.37 |
| 0  | 9  | 10  | 66.85 | 3.61 |
| 0  | -9 | 10  | 60.14 | 3.73 |
| 0  | -9 | 10  | 75.19 | 3.74 |
| 0  | -9 | 10  | 60.77 | 3.68 |
| 0  | 9  | 10  | 72.07 | 3.71 |
| 0  | -9 | 10  | 76.83 | 3.65 |
| 0  | -9 | 10  | 76.87 | 3.67 |
| 0  | -9 | 10  | 66.41 | 3.70 |
| 0  | -9 | 10  | 62.05 | 3.78 |
| 0  | -9 | 10  | 72.02 | 3.56 |
| 0  | -9 | 10  | 77.20 | 3.61 |
| 0  | -9 | 10  | 66.83 | 3.78 |
| 1  | -9 | 10  | 2.49  | 0.85 |
| -1 | -9 | -10 | 2.43  | 0.85 |
| 1  | -9 | 10  | 1.64  | 0.74 |
| -1 | 9  | 10  | 1.16  | 0.74 |
| 1  | -9 | 10  | -0.17 | 1.13 |
| -1 | 9  | 10  | 3.48  | 0.96 |
| 1  | -9 | 10  | 1.53  | 0.87 |
| -1 | 9  | 10  | 0.93  | 0.66 |
| 1  | -9 | 10  | 1.27  | 0.85 |
| 1  | -9 | 10  | 1.38  | 0.91 |
| -1 | 9  | 10  | 2.55  | 0.94 |
| 1  | -9 | 10  | 2.03  | 0.71 |
| -1 | -9 | 10  | 0.45  | 0.69 |
| -1 | -9 | 10  | 1.22  | 0.87 |
| -1 | -9 | 10  | -0.28 | 0.69 |
| -1 | -9 | 10  | 1.48  | 0.66 |
| 1  | 9  | 10  | 0.93  | 0.48 |

## CIF S3

|    |    |     |       |      |
|----|----|-----|-------|------|
| -1 | -9 | 10  | 3.25  | 1.14 |
| -1 | -9 | 10  | 0.80  | 0.75 |
| -1 | -9 | 10  | 1.29  | 0.63 |
| -1 | -9 | 10  | 1.57  | 0.45 |
| -1 | -9 | 10  | 3.01  | 0.82 |
| -1 | -9 | 10  | 1.86  | 0.70 |
| 1  | 9  | 10  | 1.19  | 0.70 |
| 2  | -9 | 10  | 6.82  | 1.60 |
| -2 | 9  | 10  | 7.39  | 0.79 |
| -2 | 9  | 10  | 5.81  | 0.94 |
| -2 | 9  | 10  | 8.33  | 1.07 |
| 2  | -9 | 10  | 8.15  | 1.17 |
| 2  | -9 | 10  | 8.40  | 1.07 |
| -2 | -9 | -10 | 7.26  | 1.10 |
| -2 | 9  | 10  | 8.67  | 1.07 |
| 2  | -9 | 10  | 7.07  | 1.35 |
| -2 | 9  | 10  | 9.02  | 1.25 |
| 2  | -9 | 10  | 8.06  | 1.25 |
| -2 | -9 | -10 | 9.22  | 1.14 |
| 2  | -9 | 10  | 10.35 | 1.18 |
| -2 | -9 | -10 | 6.63  | 1.06 |
| 2  | -9 | 10  | 9.83  | 1.37 |
| -2 | 9  | 10  | 9.27  | 1.10 |
| 2  | -9 | 10  | 9.23  | 1.03 |
| -2 | -9 | 10  | 9.75  | 1.00 |
| -2 | -9 | 10  | 9.54  | 1.00 |
| -2 | -9 | 10  | 8.65  | 1.02 |
| -2 | -9 | 10  | 8.16  | 0.81 |
| 2  | 9  | 10  | 7.20  | 0.95 |
| -2 | -9 | 10  | 8.86  | 1.18 |
| -2 | -9 | 10  | 8.47  | 0.96 |
| -2 | -9 | 10  | 8.05  | 0.92 |
| 2  | 9  | 10  | 6.94  | 1.06 |
| 3  | -9 | 10  | 5.26  | 1.23 |
| 3  | -9 | 10  | 6.25  | 1.29 |
| -3 | -9 | -10 | 5.92  | 1.61 |
| 3  | -9 | 10  | 6.33  | 1.70 |
| -3 | 9  | 10  | 7.85  | 1.02 |
| 3  | -9 | 10  | 4.93  | 1.35 |
| -3 | -9 | -10 | 6.67  | 1.23 |
| 3  | -9 | 10  | 8.53  | 1.24 |

## CIF S3

|    |    |     |       |      |
|----|----|-----|-------|------|
| -3 | 9  | 10  | 7.40  | 1.20 |
| -3 | 9  | 10  | 7.08  | 0.97 |
| 3  | -9 | 10  | 5.37  | 1.02 |
| -3 | 9  | 10  | 5.93  | 1.09 |
| -3 | -9 | 10  | 6.07  | 0.83 |
| -3 | -9 | 10  | 7.48  | 0.86 |
| 3  | 9  | 10  | 7.17  | 0.89 |
| -3 | -9 | 10  | 5.96  | 0.89 |
| -3 | -9 | 10  | 5.74  | 0.80 |
| -4 | 9  | 10  | 5.25  | 1.01 |
| -4 | -9 | -10 | 4.00  | 1.03 |
| -4 | -9 | -10 | 7.11  | 1.03 |
| -4 | -9 | -10 | 7.68  | 0.85 |
| -4 | -9 | -10 | 6.54  | 1.15 |
| 4  | -9 | 10  | 4.45  | 0.91 |
| -4 | 9  | 10  | 6.75  | 1.08 |
| -4 | -9 | -10 | 5.98  | 1.30 |
| -4 | 9  | 10  | 7.08  | 1.21 |
| -4 | 9  | 10  | 6.46  | 1.10 |
| -4 | 9  | 10  | 6.25  | 1.04 |
| -4 | 9  | 10  | 5.53  | 0.92 |
| 4  | -9 | 10  | 6.52  | 1.23 |
| -4 | -9 | 10  | 7.87  | 0.73 |
| -4 | -9 | 10  | 7.26  | 0.71 |
| -4 | -9 | 10  | 6.61  | 0.68 |
| 4  | 9  | 10  | 6.11  | 0.86 |
| -4 | -9 | 10  | 7.02  | 0.66 |
| -5 | 9  | 10  | -0.11 | 0.56 |
| -5 | -9 | -10 | 0.05  | 0.61 |
| -5 | 9  | 10  | 0.88  | 0.53 |
| -5 | -9 | -10 | 0.59  | 0.71 |
| -5 | -9 | -10 | -1.02 | 0.93 |
| -5 | -9 | -10 | 0.06  | 0.64 |
| -5 | 9  | 10  | -0.07 | 0.54 |
| -5 | -9 | -10 | 0.32  | 0.38 |
| -5 | 9  | 10  | 0.16  | 0.54 |
| -5 | 9  | 10  | -0.39 | 0.58 |
| -5 | 9  | 10  | 0.03  | 0.74 |
| -5 | -9 | 10  | 0.21  | 0.29 |
| -5 | -9 | 10  | 0.28  | 0.28 |
| -5 | -9 | 10  | -0.39 | 0.72 |

## CIF S3

|    |     |     |       |      |
|----|-----|-----|-------|------|
| 5  | 9   | 10  | 0.82  | 0.48 |
| -6 | 9   | 10  | 2.62  | 0.58 |
| -6 | -9  | -10 | 2.98  | 0.48 |
| -6 | 9   | 10  | 0.69  | 0.49 |
| -6 | -9  | -10 | 1.56  | 0.56 |
| -6 | 9   | 10  | 2.83  | 0.65 |
| -6 | 9   | 10  | 2.41  | 0.52 |
| -6 | 9   | 10  | 3.17  | 0.71 |
| -6 | -9  | -10 | 0.91  | 0.57 |
| -6 | -9  | -10 | 3.11  | 0.95 |
| -6 | -9  | -10 | 3.68  | 0.97 |
| -6 | -9  | -10 | 2.61  | 0.67 |
| 6  | 9   | 10  | 3.93  | 0.65 |
| -6 | 9   | -10 | 2.29  | 0.64 |
| -6 | -9  | 10  | 3.36  | 0.92 |
| -6 | 9   | -10 | 2.24  | 0.91 |
| -7 | 9   | 10  | 12.31 | 0.83 |
| -7 | -9  | -10 | 13.61 | 0.89 |
| -7 | -9  | -10 | 11.06 | 0.86 |
| -7 | 9   | 10  | 12.33 | 0.75 |
| -7 | -9  | -10 | 14.06 | 1.03 |
| -7 | -9  | -10 | 11.22 | 0.90 |
| -7 | 9   | 10  | 12.39 | 0.77 |
| 7  | 9   | 10  | 12.86 | 0.82 |
| 0  | -10 | 10  | 7.42  | 1.02 |
| 0  | -10 | 10  | 6.27  | 1.00 |
| 0  | -10 | 10  | 7.66  | 1.38 |
| 0  | -10 | 10  | 4.84  | 1.14 |
| 0  | -10 | -10 | 3.56  | 0.81 |
| 0  | -10 | 10  | 5.26  | 0.91 |
| 0  | -10 | 10  | 5.77  | 1.17 |
| 0  | -10 | 10  | 5.83  | 1.22 |
| 0  | -10 | -10 | 5.83  | 1.25 |
| 0  | -10 | 10  | 5.91  | 0.86 |
| 0  | -10 | 10  | 6.05  | 0.92 |
| 0  | 10  | 10  | 6.46  | 1.01 |
| -1 | -10 | -10 | 13.37 | 1.42 |
| 1  | -10 | 10  | 15.77 | 1.46 |
| 1  | -10 | 10  | 13.71 | 1.34 |
| 1  | -10 | 10  | 15.10 | 1.19 |
| 1  | -10 | 10  | 14.31 | 1.23 |

## CIF S3

|    |     |     |       |      |
|----|-----|-----|-------|------|
| -1 | 10  | 10  | 11.07 | 1.34 |
| 1  | -10 | 10  | 14.78 | 1.29 |
| 1  | -10 | 10  | 15.39 | 1.55 |
| -1 | -10 | -10 | 14.18 | 1.21 |
| 1  | -10 | 10  | 13.14 | 1.87 |
| -1 | 10  | 10  | 12.47 | 1.44 |
| 1  | -10 | 10  | 15.74 | 1.27 |
| -1 | 10  | 10  | 12.71 | 1.24 |
| -1 | -10 | 10  | 14.49 | 1.10 |
| -1 | -10 | 10  | 12.79 | 1.17 |
| -1 | -10 | 10  | 13.80 | 1.45 |
| -1 | -10 | 10  | 13.05 | 1.19 |
| -1 | -10 | 10  | 12.24 | 1.26 |
| 1  | -10 | -10 | 14.98 | 1.48 |
| -1 | -10 | 10  | 15.59 | 1.25 |
| 1  | 10  | 10  | 16.11 | 1.14 |
| -1 | -10 | 10  | 14.39 | 1.19 |
| -1 | -10 | 10  | 15.10 | 1.31 |
| -1 | -10 | 10  | 14.66 | 1.18 |
| -2 | -10 | -10 | 0.87  | 0.80 |
| 2  | -10 | 10  | 1.38  | 0.70 |
| -2 | 10  | 10  | 1.93  | 0.42 |
| -2 | 10  | 10  | 0.40  | 0.89 |
| 2  | -10 | 10  | 2.58  | 0.82 |
| 2  | -10 | 10  | 3.10  | 0.90 |
| -2 | 10  | 10  | 1.66  | 0.65 |
| -2 | 10  | 10  | 1.18  | 0.70 |
| 2  | -10 | 10  | 1.48  | 0.78 |
| 2  | -10 | 10  | 1.89  | 0.92 |
| 2  | -10 | 10  | 2.44  | 0.98 |
| -2 | 10  | 10  | 0.94  | 0.73 |
| 2  | -10 | 10  | 0.70  | 0.49 |
| -2 | -10 | 10  | 1.69  | 0.60 |
| 2  | 10  | 10  | 1.96  | 0.54 |
| -2 | -10 | 10  | 1.00  | 0.64 |
| -2 | -10 | 10  | 0.11  | 0.84 |
| -2 | -10 | 10  | 1.95  | 0.75 |
| -2 | -10 | 10  | 1.75  | 0.58 |
| 2  | -10 | -10 | 1.67  | 0.78 |
| -2 | -10 | 10  | 2.17  | 0.56 |
| -3 | 10  | 10  | 13.50 | 1.13 |

## CIF S3

|    |     |     |       |      |
|----|-----|-----|-------|------|
| -3 | -10 | -10 | 11.82 | 1.22 |
| 3  | -10 | 10  | 9.57  | 1.17 |
| -3 | 10  | 10  | 13.29 | 1.22 |
| 3  | -10 | 10  | 14.29 | 1.32 |
| -3 | -10 | -10 | 14.75 | 1.36 |
| -3 | 10  | 10  | 12.00 | 1.21 |
| 3  | -10 | 10  | 13.89 | 1.34 |
| 3  | -10 | 10  | 14.96 | 1.25 |
| -3 | -10 | -10 | 11.75 | 1.24 |
| -3 | 10  | 10  | 11.88 | 1.42 |
| 3  | -10 | 10  | 11.63 | 1.31 |
| 3  | -10 | 10  | 15.45 | 1.39 |
| -3 | -10 | 10  | 13.03 | 1.09 |
| 3  | 10  | 10  | 12.94 | 1.06 |
| -3 | -10 | 10  | 13.31 | 0.94 |
| -3 | -10 | 10  | 12.03 | 1.00 |
| 3  | -10 | -10 | 12.57 | 1.55 |
| -3 | -10 | 10  | 12.48 | 1.03 |
| -4 | -10 | -10 | 2.76  | 0.75 |
| -4 | 10  | 10  | 0.86  | 0.61 |
| -4 | -10 | -10 | 1.03  | 0.39 |
| -4 | -10 | -10 | 3.55  | 0.95 |
| -4 | 10  | 10  | 2.63  | 0.63 |
| -4 | 10  | 10  | 1.73  | 0.64 |
| -4 | 10  | 10  | 0.37  | 0.59 |
| 4  | -10 | 10  | 2.18  | 0.74 |
| -4 | 10  | 10  | 2.18  | 0.73 |
| -4 | 10  | 10  | 1.77  | 0.83 |
| 4  | 10  | 10  | 2.05  | 0.53 |
| -4 | -10 | 10  | 2.59  | 0.60 |
| 4  | -10 | -10 | 1.90  | 0.92 |
| -4 | -10 | 10  | 2.06  | 0.40 |
| -4 | -10 | 10  | 2.41  | 0.49 |
| -5 | 10  | 10  | 1.36  | 0.51 |
| -5 | 10  | 10  | 2.48  | 0.49 |
| -5 | -10 | -10 | 1.35  | 0.61 |
| -5 | 10  | 10  | 1.95  | 0.54 |
| -5 | 10  | 10  | 1.55  | 0.54 |
| -5 | -10 | -10 | 2.12  | 0.49 |
| -5 | 10  | 10  | 2.56  | 0.62 |
| -5 | 10  | 10  | 2.18  | 0.72 |

## CIF S3

|            |       |      |
|------------|-------|------|
| -5 -10 -10 | 0.98  | 0.63 |
| -5 10 10   | 3.29  | 0.85 |
| -5 -10 -10 | 0.82  | 0.36 |
| 5 -10 -10  | 1.24  | 0.85 |
| 5 10 10    | 1.38  | 0.47 |
| -5 -10 10  | 2.21  | 0.42 |
| -5 -10 10  | 2.10  | 0.40 |
| -6 -10 -10 | 1.10  | 0.61 |
| 0 -11 10   | 15.05 | 1.18 |
| 0 -11 10   | 12.57 | 1.23 |
| 0 -11 -10  | 15.41 | 1.23 |
| 0 -11 10   | 13.37 | 1.19 |
| 0 -11 10   | 14.33 | 1.43 |
| 0 11 10    | 14.29 | 1.22 |
| 0 -11 10   | 13.93 | 1.26 |
| 0 -11 10   | 13.19 | 1.33 |
| 0 -11 -10  | 14.17 | 1.43 |
| 0 -11 10   | 14.28 | 1.12 |
| 0 -11 10   | 16.36 | 1.00 |
| 0 -11 10   | 13.12 | 1.22 |
| 1 -11 10   | 0.57  | 0.72 |
| 1 -11 10   | 1.03  | 0.94 |
| 1 -11 10   | 1.39  | 0.65 |
| -1 11 10   | 0.39  | 0.89 |
| 1 -11 10   | 0.33  | 0.50 |
| -1 -11 -10 | 1.40  | 0.82 |
| -1 -11 -10 | 0.35  | 0.42 |
| 1 -11 10   | 1.05  | 0.78 |
| 1 -11 10   | 2.40  | 0.64 |
| 1 -11 10   | -0.01 | 0.77 |
| -1 11 10   | 0.28  | 0.57 |
| 1 -11 10   | 0.77  | 0.70 |
| -1 -11 10  | 0.93  | 0.61 |
| 1 -11 -10  | 0.55  | 0.83 |
| -1 -11 10  | 1.47  | 0.63 |
| -1 -11 10  | 0.85  | 0.58 |
| 1 11 10    | 0.38  | 0.60 |
| -1 -11 10  | 1.69  | 0.60 |
| -1 -11 10  | 1.39  | 0.96 |
| -1 -11 10  | 0.08  | 0.62 |
| -1 -11 10  | 0.76  | 0.78 |

## CIF S3

|    |     |     |      |      |
|----|-----|-----|------|------|
| 1  | -11 | -10 | 1.78 | 0.71 |
| -1 | -11 | 10  | 1.24 | 0.60 |
| 2  | -11 | 10  | 1.45 | 0.92 |
| -2 | 11  | 10  | 1.34 | 0.70 |
| -2 | 11  | 10  | 2.15 | 0.55 |
| 2  | -11 | 10  | 0.62 | 0.76 |
| -2 | 11  | 10  | 0.99 | 0.69 |
| -2 | 11  | 10  | 0.75 | 0.60 |
| -2 | 11  | 10  | 0.97 | 0.84 |
| 2  | -11 | 10  | 1.06 | 0.76 |
| -2 | -11 | -10 | 1.85 | 0.79 |
| 2  | -11 | 10  | 0.62 | 0.65 |
| 2  | -11 | 10  | 1.58 | 0.77 |
| 2  | -11 | 10  | 1.43 | 0.73 |
| 2  | -11 | 10  | 1.94 | 0.78 |
| 2  | -11 | 10  | 0.78 | 0.44 |
| -2 | -11 | 10  | 1.54 | 0.57 |
| -2 | -11 | 10  | 1.22 | 1.09 |
| -2 | -11 | 10  | 2.06 | 0.58 |
| -2 | -11 | 10  | 1.32 | 0.49 |
| 2  | -11 | -10 | 3.25 | 1.04 |
| 2  | 11  | 10  | 2.48 | 0.60 |
| 3  | -11 | 10  | 1.75 | 0.75 |
| 3  | -11 | 10  | 1.90 | 0.69 |
| -3 | 11  | 10  | 4.07 | 0.95 |
| -3 | 11  | 10  | 3.40 | 0.88 |
| 3  | -11 | 10  | 2.69 | 0.86 |
| -3 | 11  | 10  | 2.14 | 0.63 |
| -3 | 11  | 10  | 2.54 | 0.66 |
| -3 | -11 | -10 | 1.99 | 0.47 |
| -3 | -11 | -10 | 4.25 | 1.02 |
| 3  | -11 | 10  | 0.62 | 0.68 |
| -3 | -11 | 10  | 3.36 | 0.64 |
| 3  | 11  | 10  | 3.42 | 0.77 |
| 3  | -11 | -10 | 5.95 | 1.12 |
| -3 | -11 | 10  | 2.63 | 0.58 |
| -3 | -11 | 10  | 3.53 | 0.72 |
| -4 | -11 | -10 | 2.31 | 1.00 |
| -4 | 11  | 10  | 3.24 | 0.87 |
| -4 | -11 | -10 | 1.70 | 0.65 |
| 4  | -11 | 10  | 1.92 | 0.65 |



## CIF S3

|    |     |     |       |      |
|----|-----|-----|-------|------|
| -4 | 11  | 10  | 3.96  | 0.80 |
| -4 | 11  | 10  | 1.38  | 0.75 |
| -4 | 11  | 10  | 1.59  | 0.55 |
| -4 | -11 | -10 | 3.14  | 0.73 |
| -4 | -11 | -10 | 2.17  | 0.83 |
| 4  | 11  | 10  | 2.42  | 0.68 |
| -4 | -11 | 10  | 2.89  | 0.56 |
| -4 | -11 | 10  | 2.45  | 0.58 |
| 4  | -11 | -10 | 5.76  | 1.23 |
| -5 | 11  | 10  | 3.54  | 0.81 |
| -5 | -11 | -10 | 3.99  | 0.89 |
| -5 | 11  | 10  | 3.99  | 0.67 |
| -5 | 11  | 10  | 4.27  | 0.60 |
| -5 | 11  | 10  | 2.80  | 0.67 |
| -5 | 11  | 10  | 4.14  | 0.64 |
| -5 | 11  | 10  | 4.32  | 0.74 |
| -5 | -11 | -10 | 4.14  | 0.82 |
| -5 | -11 | 10  | 5.14  | 0.35 |
| 5  | 11  | 10  | 4.65  | 0.61 |
| 5  | -11 | -10 | 5.79  | 0.99 |
| -5 | -11 | 10  | 4.17  | 0.39 |
| -5 | -11 | 10  | 4.10  | 0.38 |
| 0  | -12 | 10  | -0.34 | 0.47 |
| 0  | -12 | 10  | 0.53  | 0.56 |
| 0  | -12 | -10 | -0.31 | 0.75 |
| 0  | -12 | 10  | -0.57 | 0.54 |
| 0  | 12  | 10  | 0.01  | 0.52 |
| 0  | -12 | 10  | 0.76  | 0.85 |
| 0  | -12 | 10  | 0.51  | 0.59 |
| 0  | -12 | 10  | -0.27 | 0.48 |
| 0  | -12 | 10  | 0.37  | 0.52 |
| 1  | -12 | 10  | 4.34  | 0.87 |
| -1 | 12  | 10  | 4.75  | 0.62 |
| 1  | -12 | 10  | 4.10  | 0.90 |
| 1  | -12 | 10  | 5.19  | 0.80 |
| 1  | -12 | 10  | 4.44  | 1.22 |
| 1  | -12 | 10  | 4.84  | 0.74 |
| -1 | 12  | 10  | 4.16  | 1.18 |
| -1 | -12 | -10 | 4.90  | 0.98 |
| 1  | -12 | 10  | 5.67  | 1.10 |
| -1 | 12  | 10  | 2.95  | 0.81 |

## CIF S3

|    |     |     |      |      |
|----|-----|-----|------|------|
| 1  | -12 | -10 | 4.01 | 0.93 |
| 1  | 12  | 10  | 5.15 | 0.85 |
| -1 | -12 | 10  | 3.58 | 0.70 |
| -1 | -12 | 10  | 5.59 | 0.80 |
| 1  | -12 | -10 | 4.12 | 1.00 |
| -1 | -12 | 10  | 6.48 | 0.85 |
| -1 | -12 | 10  | 4.79 | 0.83 |
| -1 | -12 | 10  | 5.58 | 1.07 |
| -2 | -12 | -10 | 1.19 | 0.49 |
| 2  | -12 | 10  | 0.04 | 0.63 |
| 2  | -12 | 10  | 0.17 | 0.57 |
| -2 | 12  | 10  | 0.74 | 0.83 |
| -2 | 12  | 10  | 0.13 | 0.53 |
| -2 | 12  | 10  | 0.94 | 0.65 |
| 2  | -12 | 10  | 0.58 | 0.56 |
| 2  | -12 | 10  | 0.32 | 0.34 |
| 2  | -12 | 10  | 0.50 | 0.55 |
| -2 | 12  | 10  | 0.52 | 0.65 |
| -2 | -12 | -10 | 1.04 | 0.67 |
| 2  | -12 | 10  | 0.80 | 0.78 |
| -2 | -12 | 10  | 0.60 | 0.47 |
| 2  | -12 | -10 | 0.53 | 0.68 |
| -2 | -12 | 10  | 0.55 | 0.46 |
| 2  | 12  | 10  | 0.77 | 0.52 |
| 2  | -12 | -10 | 1.50 | 0.76 |
| 3  | -12 | 10  | 0.17 | 0.59 |
| 3  | -12 | 10  | 1.86 | 0.75 |
| -3 | -12 | -10 | 0.61 | 0.70 |
| -3 | 12  | 10  | 1.05 | 0.49 |
| 3  | -12 | 10  | 0.40 | 0.69 |
| 3  | -12 | 10  | 0.65 | 0.58 |
| -3 | 12  | 10  | 1.16 | 0.73 |
| -3 | 12  | 10  | 0.97 | 0.55 |
| -3 | -12 | -10 | 0.02 | 0.54 |
| 3  | 12  | 10  | 0.64 | 0.43 |
| -3 | -12 | 10  | 0.83 | 0.37 |
| 3  | -12 | -10 | 0.48 | 0.56 |
| -3 | -12 | 10  | 0.52 | 0.40 |
| 3  | -12 | -10 | 0.49 | 0.68 |
| -4 | 12  | 10  | 2.72 | 0.65 |
| 4  | -12 | 10  | 2.17 | 0.53 |

## CIF S3

|    |     |     |       |      |
|----|-----|-----|-------|------|
| -4 | -12 | -10 | 1.42  | 0.68 |
| -4 | 12  | 10  | 1.13  | 0.42 |
| -4 | -12 | -10 | 1.15  | 0.54 |
| -4 | 12  | 10  | 2.21  | 0.61 |
| 4  | -12 | -10 | 2.25  | 0.61 |
| 4  | 12  | 10  | 1.95  | 0.40 |
| -4 | -12 | 10  | 2.37  | 0.44 |
| 4  | -12 | -10 | 3.02  | 0.83 |
| 0  | -13 | 10  | 1.81  | 0.51 |
| 0  | -13 | 10  | 1.15  | 0.41 |
| 0  | -13 | 10  | 2.29  | 0.46 |
| 0  | -13 | 10  | 2.30  | 0.72 |
| 0  | -13 | 10  | 1.15  | 0.43 |
| 0  | 13  | 10  | 2.61  | 0.66 |
| 0  | 13  | 10  | 1.99  | 0.51 |
| 0  | -13 | 10  | 1.27  | 0.41 |
| 1  | -13 | 10  | 1.11  | 0.68 |
| 1  | -13 | 10  | 3.74  | 0.99 |
| -1 | 13  | 10  | 1.68  | 0.74 |
| -1 | 13  | 10  | 1.85  | 0.47 |
| 1  | -13 | 10  | 2.05  | 0.77 |
| 1  | -13 | 10  | 2.08  | 0.62 |
| 1  | -13 | 10  | 1.94  | 0.47 |
| -1 | 13  | 10  | 1.95  | 0.38 |
| 1  | 13  | 10  | 2.04  | 0.45 |
| -1 | -13 | 10  | 3.04  | 0.82 |
| -1 | -13 | 10  | 1.52  | 0.45 |
| -1 | -13 | 10  | 0.99  | 0.40 |
| -1 | -13 | 10  | 0.96  | 0.42 |
| -1 | -13 | 10  | 1.07  | 0.39 |
| -2 | 13  | 10  | 1.05  | 0.45 |
| -2 | 13  | 10  | 0.54  | 0.57 |
| -2 | 13  | 10  | 0.55  | 0.60 |
| 2  | -13 | 10  | 0.99  | 0.47 |
| 2  | -13 | 10  | -0.35 | 0.66 |
| 2  | -13 | 10  | 0.34  | 0.42 |
| -2 | -13 | 10  | 0.84  | 0.37 |
| -2 | -13 | 10  | -0.19 | 0.37 |
| -2 | -13 | 10  | 0.44  | 0.34 |
| 2  | 13  | 10  | 0.63  | 0.38 |
| 3  | -13 | 10  | 0.15  | 0.38 |

## CIF S3

|    |     |     |       |      |
|----|-----|-----|-------|------|
| -3 | 13  | 10  | 1.12  | 0.36 |
| 3  | -13 | 10  | 2.83  | 0.87 |
| -3 | -13 | -10 | 0.95  | 0.58 |
| -3 | 13  | 10  | 1.01  | 0.43 |
| -3 | 13  | 10  | 2.11  | 0.57 |
| 3  | -13 | 10  | 2.42  | 0.59 |
| -3 | -13 | 10  | 2.39  | 0.45 |
| 3  | -13 | -10 | 1.67  | 0.51 |
| 3  | 13  | 10  | 2.04  | 0.48 |
| -3 | -13 | 10  | 1.96  | 0.43 |
| 0  | 0   | -11 | 0.06  | 0.79 |
| 0  | 0   | 11  | 0.35  | 0.46 |
| 0  | 0   | 11  | -0.24 | 0.34 |
| 0  | 0   | -11 | 1.01  | 0.76 |
| 0  | 0   | -11 | 0.52  | 0.83 |
| 1  | 0   | 11  | 34.85 | 1.88 |
| -1 | 0   | -11 | 30.90 | 2.23 |
| -1 | 0   | -11 | 36.02 | 2.75 |
| -1 | 0   | 11  | 33.48 | 1.89 |
| -1 | 0   | -11 | 34.36 | 2.14 |
| 1  | 0   | -11 | 36.30 | 2.07 |
| 1  | 0   | -11 | 33.27 | 2.17 |
| -2 | 0   | 11  | 8.09  | 0.76 |
| 2  | 0   | -11 | 7.91  | 1.09 |
| 2  | 0   | 11  | 9.14  | 0.76 |
| 2  | 0   | -11 | 7.23  | 0.90 |
| -2 | 0   | 11  | 8.08  | 0.67 |
| -3 | 0   | 11  | 4.18  | 0.52 |
| 3  | 0   | 11  | 3.89  | 0.65 |
| 3  | 0   | -11 | 3.74  | 0.94 |
| -3 | 0   | -11 | 3.20  | 0.92 |
| -3 | 0   | -11 | 3.24  | 0.93 |
| -3 | 0   | 11  | 3.39  | 0.78 |
| -3 | 0   | 11  | 3.93  | 0.63 |
| 3  | 0   | -11 | 5.12  | 0.83 |
| -4 | 0   | -11 | 16.04 | 1.42 |
| -4 | 0   | -11 | 17.57 | 1.52 |
| 4  | 0   | -11 | 15.22 | 1.35 |
| 4  | 0   | 11  | 15.78 | 1.14 |
| -4 | 0   | 11  | 17.17 | 0.98 |
| -4 | 0   | 11  | 16.23 | 1.04 |

## CIF S3

|    |    |     |       |      |
|----|----|-----|-------|------|
| -4 | 0  | 11  | 15.74 | 1.21 |
| -5 | 0  | 11  | 31.34 | 1.59 |
| -5 | 0  | -11 | 25.72 | 2.12 |
| -5 | 0  | -11 | 29.61 | 1.98 |
| -5 | 0  | 11  | 29.51 | 1.62 |
| -5 | 0  | -11 | 28.53 | 1.73 |
| -5 | 0  | 11  | 32.20 | 1.83 |
| -6 | 0  | 11  | 81.95 | 4.39 |
| -6 | 0  | 11  | 84.36 | 4.21 |
| -6 | 0  | -11 | 85.13 | 4.50 |
| -6 | 0  | 11  | 87.22 | 4.19 |
| -6 | 0  | -11 | 85.68 | 4.47 |
| -6 | 0  | -11 | 81.07 | 4.38 |
| -6 | 0  | -11 | 90.40 | 4.48 |
| 6  | 0  | 11  | 83.93 | 4.38 |
| -6 | 0  | 11  | 84.74 | 4.18 |
| -6 | 0  | 11  | 86.91 | 4.17 |
| -6 | 0  | -11 | 82.58 | 4.34 |
| -7 | 0  | -11 | 41.24 | 2.51 |
| -7 | 0  | -11 | 46.90 | 2.17 |
| 7  | 0  | 11  | 41.14 | 2.32 |
| -7 | 0  | -11 | 38.77 | 2.29 |
| -7 | 0  | -11 | 41.27 | 2.30 |
| -7 | 0  | -11 | 41.83 | 2.66 |
| -8 | 0  | -11 | 0.02  | 0.45 |
| 8  | 0  | 11  | 0.14  | 0.42 |
| -8 | 0  | -11 | 0.26  | 0.92 |
| -8 | 0  | -11 | -0.04 | 0.49 |
| -8 | 0  | -11 | 0.41  | 0.50 |
| -8 | 0  | -11 | -1.14 | 0.83 |
| -9 | 0  | -11 | 0.59  | 0.31 |
| -9 | 0  | -11 | 1.03  | 0.35 |
| -9 | 0  | -11 | 0.59  | 0.34 |
| -9 | 0  | -11 | 0.90  | 0.57 |
| 9  | 0  | 11  | 0.79  | 0.33 |
| 0  | 1  | -11 | 42.92 | 2.60 |
| 0  | -1 | -11 | 45.08 | 2.68 |
| 0  | -1 | 11  | 43.51 | 2.29 |
| 0  | 1  | -11 | 45.03 | 3.05 |
| 0  | 1  | 11  | 43.33 | 2.31 |
| 0  | -1 | -11 | 49.26 | 2.54 |

## CIF S3

|    |    |     |       |      |
|----|----|-----|-------|------|
| 0  | 1  | 11  | 43.61 | 2.38 |
| 0  | -1 | -11 | 38.25 | 3.00 |
| 0  | -1 | 11  | 43.63 | 2.35 |
| 0  | 1  | -11 | 45.51 | 2.53 |
| -1 | 1  | 11  | 51.29 | 2.72 |
| -1 | -1 | -11 | 48.47 | 3.20 |
| 1  | -1 | 11  | 54.19 | 2.70 |
| 1  | 1  | -11 | 54.24 | 2.84 |
| -1 | -1 | -11 | 58.13 | 2.93 |
| 1  | 1  | -11 | 50.44 | 2.96 |
| 1  | -1 | -11 | 51.71 | 2.97 |
| 1  | 1  | 11  | 55.26 | 2.70 |
| -1 | 1  | -11 | 42.62 | 3.74 |
| 1  | -1 | -11 | 49.23 | 2.86 |
| -1 | 1  | -11 | 54.21 | 2.91 |
| -1 | -1 | 11  | 48.70 | 2.69 |
| -1 | 1  | -11 | 52.23 | 3.05 |
| 2  | -1 | 11  | 20.47 | 1.26 |
| -2 | 1  | 11  | 20.38 | 1.26 |
| 2  | 1  | -11 | 19.89 | 1.40 |
| 2  | 1  | -11 | 23.12 | 1.52 |
| -2 | 1  | -11 | 19.02 | 1.48 |
| 2  | -1 | -11 | 22.01 | 1.59 |
| -2 | -1 | 11  | 20.77 | 1.18 |
| 2  | 1  | 11  | 20.93 | 1.26 |
| -2 | -1 | 11  | 20.29 | 1.22 |
| -2 | -1 | 11  | 13.73 | 1.52 |
| 2  | -1 | -11 | 20.36 | 1.47 |
| 3  | 1  | -11 | 2.78  | 0.65 |
| 3  | 1  | -11 | 2.10  | 0.72 |
| 3  | -1 | 11  | 2.35  | 0.60 |
| -3 | 1  | 11  | 1.32  | 0.37 |
| -3 | 1  | 11  | 1.21  | 0.47 |
| -3 | -1 | -11 | 1.64  | 0.78 |
| -3 | -1 | -11 | 2.61  | 0.83 |
| -3 | 1  | 11  | 1.33  | 0.64 |
| -3 | -1 | 11  | 2.42  | 0.47 |
| -3 | -1 | 11  | 1.82  | 0.42 |
| 3  | -1 | -11 | 1.94  | 0.81 |
| -3 | 1  | -11 | 1.65  | 0.79 |
| -3 | 1  | -11 | 2.12  | 0.75 |

## CIF S3

|    |    |     |       |      |
|----|----|-----|-------|------|
| 3  | -1 | -11 | -0.01 | 0.84 |
| -3 | -1 | 11  | 2.83  | 0.61 |
| -3 | -1 | 11  | 1.78  | 0.28 |
| 3  | 1  | 11  | 2.22  | 0.52 |
| -4 | -1 | -11 | 3.63  | 1.08 |
| 4  | 1  | -11 | 2.66  | 0.83 |
| -4 | 1  | 11  | 3.72  | 0.54 |
| -4 | 1  | 11  | 3.15  | 0.84 |
| -4 | 1  | 11  | 4.46  | 0.67 |
| 4  | 1  | -11 | 2.15  | 0.59 |
| 4  | -1 | 11  | 3.55  | 0.75 |
| 4  | -1 | -11 | 4.58  | 1.04 |
| -4 | 1  | -11 | 3.70  | 0.95 |
| -4 | -1 | 11  | 3.42  | 0.73 |
| -4 | -1 | 11  | 3.39  | 0.54 |
| 4  | -1 | -11 | 2.99  | 0.88 |
| -4 | 1  | -11 | 3.98  | 1.14 |
| 4  | 1  | 11  | 2.90  | 0.69 |
| -4 | -1 | 11  | 4.05  | 0.49 |
| -5 | -1 | -11 | 29.03 | 1.88 |
| -5 | 1  | 11  | 25.83 | 1.70 |
| -5 | -1 | -11 | 27.76 | 1.64 |
| -5 | 1  | 11  | 28.70 | 1.52 |
| 5  | -1 | 11  | 25.66 | 1.71 |
| -5 | 1  | 11  | 26.03 | 1.48 |
| -5 | 1  | -11 | 26.40 | 1.87 |
| -5 | -1 | 11  | 27.36 | 1.44 |
| -5 | -1 | 11  | 26.02 | 1.70 |
| -5 | 1  | -11 | 25.94 | 2.13 |
| -6 | -1 | -11 | 43.49 | 2.42 |
| 6  | -1 | 11  | 40.16 | 2.31 |
| -6 | -1 | -11 | 41.79 | 2.50 |
| -6 | 1  | 11  | 40.30 | 2.10 |
| -6 | -1 | -11 | 33.80 | 2.24 |
| -6 | 1  | 11  | 40.25 | 2.05 |
| -6 | -1 | -11 | 41.24 | 2.26 |
| -6 | -1 | -11 | 41.19 | 2.51 |
| -6 | 1  | 11  | 39.97 | 2.06 |
| -6 | -1 | -11 | 38.36 | 2.22 |
| -6 | -1 | 11  | 39.07 | 2.04 |
| -6 | -1 | 11  | 41.03 | 2.01 |

## CIF S3

|    |    |     |       |      |
|----|----|-----|-------|------|
| -6 | 1  | -11 | 39.31 | 2.55 |
| 6  | 1  | 11  | 39.63 | 2.25 |
| -6 | -1 | 11  | 41.19 | 2.00 |
| -6 | -1 | 11  | 42.68 | 2.01 |
| -6 | 1  | -11 | 38.80 | 2.61 |
| -6 | 1  | -11 | 44.20 | 2.45 |
| -6 | 1  | -11 | 41.42 | 2.26 |
| -6 | -1 | 11  | 42.67 | 2.36 |
| -7 | 1  | 11  | 1.23  | 0.28 |
| -7 | -1 | -11 | 2.91  | 1.11 |
| -7 | 1  | 11  | 1.15  | 0.27 |
| 7  | -1 | 11  | 1.62  | 0.59 |
| -7 | 1  | 11  | 1.28  | 0.21 |
| -7 | -1 | -11 | 0.77  | 0.91 |
| -7 | -1 | -11 | 0.91  | 0.61 |
| -7 | -1 | -11 | 0.74  | 0.57 |
| -7 | 1  | -11 | 0.44  | 1.06 |
| -7 | 1  | -11 | 1.80  | 0.38 |
| 7  | 1  | 11  | 0.91  | 0.47 |
| -7 | 1  | -11 | 1.40  | 0.60 |
| -7 | 1  | -11 | 0.84  | 0.62 |
| -7 | 1  | -11 | 1.97  | 1.02 |
| -8 | -1 | -11 | 1.92  | 0.51 |
| -8 | -1 | -11 | 2.15  | 0.49 |
| -8 | -1 | -11 | 2.69  | 0.71 |
| -8 | -1 | -11 | 2.45  | 0.64 |
| 8  | -1 | 11  | 2.58  | 0.73 |
| -8 | -1 | -11 | 1.73  | 0.49 |
| -8 | -1 | -11 | 4.51  | 1.24 |
| -8 | -1 | -11 | 3.72  | 1.11 |
| -8 | 1  | -11 | 1.93  | 0.78 |
| -8 | 1  | -11 | 2.65  | 0.97 |
| -8 | 1  | -11 | 3.65  | 0.71 |
| -8 | 1  | -11 | 3.30  | 0.72 |
| 8  | 1  | 11  | 2.26  | 0.75 |
| 9  | -1 | 11  | 3.18  | 0.55 |
| -9 | -1 | -11 | 3.09  | 0.57 |
| -9 | -1 | -11 | 3.59  | 0.56 |
| -9 | -1 | -11 | 4.66  | 0.86 |
| -9 | -1 | -11 | 3.47  | 0.90 |
| -9 | -1 | -11 | 3.24  | 0.54 |



## CIF S3

|    |    |     |       |      |
|----|----|-----|-------|------|
| 9  | 1  | 11  | 3.65  | 0.59 |
| -9 | 1  | -11 | 3.90  | 0.58 |
| -9 | 1  | -11 | 3.04  | 0.61 |
| -9 | 1  | -11 | 2.87  | 0.57 |
| -9 | 1  | -11 | 3.58  | 0.86 |
| 0  | 2  | -11 | 17.09 | 1.37 |
| 0  | -2 | -11 | 14.99 | 1.42 |
| 0  | -2 | -11 | 13.56 | 1.27 |
| 0  | -2 | 11  | 16.00 | 1.08 |
| 0  | 2  | 11  | 15.85 | 0.98 |
| 0  | -2 | -11 | 13.57 | 1.92 |
| 0  | 2  | 11  | 15.36 | 1.09 |
| 0  | -2 | 11  | 15.99 | 0.98 |
| 0  | 2  | -11 | 17.16 | 1.27 |
| 0  | 2  | -11 | 14.27 | 1.78 |
| 1  | 2  | -11 | 2.58  | 0.73 |
| 1  | 2  | -11 | 2.71  | 0.87 |
| -1 | 2  | 11  | 2.12  | 0.51 |
| -1 | 2  | 11  | 2.24  | 0.52 |
| 1  | -2 | 11  | 2.71  | 0.63 |
| -1 | -2 | -11 | 3.57  | 0.97 |
| 1  | 2  | 11  | 2.82  | 0.55 |
| -1 | -2 | 11  | 3.16  | 0.69 |
| 1  | -2 | -11 | 2.77  | 1.02 |
| 1  | -2 | -11 | 3.94  | 0.98 |
| -1 | 2  | -11 | 2.76  | 0.88 |
| 1  | -2 | -11 | 3.66  | 1.20 |
| -1 | 2  | -11 | 3.32  | 0.82 |
| -2 | -2 | -11 | 15.63 | 1.37 |
| -2 | 2  | 11  | 16.80 | 1.15 |
| 2  | 2  | -11 | 16.76 | 1.22 |
| 2  | 2  | -11 | 17.57 | 1.35 |
| -2 | 2  | 11  | 18.48 | 1.53 |
| 2  | -2 | 11  | 17.05 | 1.13 |
| -2 | -2 | 11  | 16.84 | 1.12 |
| -2 | -2 | 11  | 16.86 | 1.02 |
| -2 | 2  | -11 | 16.01 | 1.36 |
| -2 | -2 | 11  | 16.44 | 1.11 |
| -2 | -2 | 11  | 17.72 | 1.04 |
| -2 | 2  | -11 | 16.45 | 1.38 |
| 2  | 2  | 11  | 17.04 | 1.10 |

## CIF S3

|    |    |     |       |      |
|----|----|-----|-------|------|
| 2  | -2 | -11 | 18.62 | 1.58 |
| 2  | -2 | -11 | 16.68 | 1.39 |
| -3 | 2  | 11  | 3.90  | 0.71 |
| -3 | 2  | 11  | 3.37  | 0.73 |
| -3 | 2  | 11  | 3.23  | 0.77 |
| 3  | 2  | -11 | 3.00  | 0.71 |
| 3  | -2 | 11  | 3.23  | 0.70 |
| -3 | -2 | -11 | 1.59  | 0.78 |
| 3  | 2  | -11 | 3.89  | 0.83 |
| 3  | -2 | -11 | 3.33  | 1.13 |
| -3 | -2 | 11  | 3.28  | 0.60 |
| 3  | 2  | 11  | 3.31  | 0.63 |
| -3 | -2 | 11  | 3.39  | 0.51 |
| -3 | -2 | 11  | 3.14  | 0.31 |
| 3  | -2 | -11 | 4.22  | 0.94 |
| -3 | 2  | -11 | 2.35  | 0.86 |
| -3 | -2 | 11  | 3.95  | 0.33 |
| -3 | 2  | -11 | 2.22  | 0.66 |
| -3 | -2 | 11  | 4.60  | 0.69 |
| -3 | 2  | -11 | 2.58  | 0.90 |
| -4 | -2 | -11 | 13.69 | 1.36 |
| 4  | -2 | 11  | 17.51 | 1.20 |
| 4  | 2  | -11 | 16.30 | 1.04 |
| -4 | 2  | 11  | 16.43 | 1.01 |
| -4 | 2  | 11  | 17.67 | 1.11 |
| -4 | 2  | 11  | 13.20 | 0.94 |
| -4 | 2  | 11  | 15.77 | 1.23 |
| -4 | 2  | -11 | 17.82 | 1.49 |
| -4 | -2 | 11  | 15.91 | 1.23 |
| 4  | 2  | 11  | 16.97 | 1.16 |
| 4  | -2 | -11 | 15.86 | 1.40 |
| 4  | -2 | -11 | 14.80 | 1.55 |
| -4 | -2 | 11  | 17.75 | 0.97 |
| -4 | 2  | -11 | 16.56 | 1.62 |
| -4 | -2 | 11  | 16.88 | 1.01 |
| -5 | -2 | -11 | 29.06 | 2.06 |
| -5 | -2 | -11 | 31.00 | 1.89 |
| -5 | 2  | 11  | 31.88 | 1.96 |
| -5 | 2  | 11  | 32.12 | 1.77 |
| 5  | -2 | 11  | 33.41 | 1.97 |
| -5 | 2  | -11 | 32.34 | 2.11 |

## CIF S3

|    |    |     |       |      |
|----|----|-----|-------|------|
| -5 | -2 | 11  | 32.73 | 1.65 |
| -5 | -2 | 11  | 33.28 | 1.92 |
| -5 | 2  | -11 | 30.81 | 2.26 |
| -6 | -2 | -11 | 5.64  | 1.43 |
| -6 | 2  | 11  | 4.86  | 0.83 |
| 6  | -2 | 11  | 5.51  | 0.98 |
| -6 | -2 | -11 | 6.06  | 0.97 |
| -6 | -2 | -11 | 4.87  | 1.03 |
| -6 | 2  | 11  | 5.65  | 0.56 |
| -6 | 2  | 11  | 3.46  | 0.57 |
| -6 | 2  | 11  | 5.39  | 0.47 |
| -6 | -2 | -11 | 5.13  | 0.92 |
| -6 | -2 | -11 | 6.20  | 0.94 |
| -6 | -2 | -11 | 4.04  | 1.01 |
| 6  | 2  | 11  | 5.61  | 0.83 |
| -6 | 2  | -11 | 4.81  | 1.09 |
| -6 | -2 | 11  | 5.48  | 0.39 |
| -6 | 2  | -11 | 3.25  | 0.87 |
| -6 | 2  | -11 | 7.57  | 1.48 |
| -6 | -2 | 11  | 5.00  | 1.05 |
| -6 | 2  | -11 | 5.74  | 1.32 |
| -7 | 2  | 11  | 1.01  | 0.26 |
| -7 | -2 | -11 | 1.82  | 0.62 |
| -7 | 2  | 11  | 1.16  | 0.26 |
| 7  | -2 | 11  | 0.70  | 0.58 |
| -7 | 2  | 11  | 1.14  | 0.47 |
| -7 | -2 | -11 | 1.16  | 0.54 |
| -7 | -2 | -11 | 0.48  | 1.02 |
| -7 | -2 | -11 | 1.77  | 0.89 |
| -7 | 2  | -11 | 1.40  | 0.97 |
| -7 | 2  | -11 | 0.78  | 1.02 |
| 7  | 2  | 11  | 1.27  | 0.47 |
| -7 | 2  | -11 | 1.30  | 0.40 |
| -7 | 2  | -11 | 1.88  | 0.57 |
| -7 | 2  | -11 | 1.55  | 0.58 |
| 8  | -2 | 11  | 0.28  | 0.46 |
| -8 | -2 | -11 | 0.59  | 0.81 |
| -8 | -2 | -11 | 0.36  | 0.47 |
| -8 | -2 | -11 | 0.53  | 0.51 |
| -8 | -2 | -11 | 0.20  | 0.40 |
| -8 | -2 | -11 | 0.06  | 0.41 |

## CIF S3

|    |    |     |       |      |
|----|----|-----|-------|------|
| -8 | -2 | -11 | 0.69  | 0.92 |
| -8 | -2 | -11 | 0.30  | 0.48 |
| -8 | 2  | -11 | 0.45  | 0.82 |
| 8  | 2  | 11  | 0.91  | 0.42 |
| -8 | 2  | -11 | 1.06  | 0.48 |
| -8 | 2  | -11 | -0.14 | 0.42 |
| -9 | -2 | -11 | 0.24  | 0.33 |
| -9 | -2 | -11 | 0.17  | 0.60 |
| -9 | -2 | -11 | 0.27  | 0.32 |
| -9 | -2 | -11 | 0.13  | 0.32 |
| 9  | -2 | 11  | 0.11  | 0.29 |
| 9  | 2  | 11  | 0.57  | 0.30 |
| -9 | 2  | -11 | 0.37  | 0.34 |
| -9 | 2  | -11 | 0.36  | 0.35 |
| -9 | 2  | -11 | 0.02  | 0.52 |
| -9 | 2  | -11 | 0.15  | 0.32 |
| 0  | 3  | -11 | 45.80 | 2.72 |
| 0  | -3 | 11  | 46.33 | 2.41 |
| 0  | 3  | 11  | 47.23 | 2.43 |
| 0  | -3 | -11 | 42.53 | 2.69 |
| 0  | -3 | 11  | 46.27 | 2.51 |
| 0  | 3  | -11 | 47.62 | 2.65 |
| 0  | -3 | -11 | 46.96 | 2.91 |
| 1  | -3 | 11  | 20.69 | 1.21 |
| 1  | 3  | -11 | 20.36 | 1.40 |
| -1 | 3  | 11  | 17.90 | 1.31 |
| -1 | 3  | 11  | 19.50 | 1.17 |
| 1  | 3  | -11 | 18.97 | 1.48 |
| -1 | -3 | -11 | 18.94 | 1.52 |
| -1 | 3  | -11 | 21.56 | 1.53 |
| 1  | 3  | 11  | 20.31 | 1.21 |
| 1  | -3 | -11 | 20.76 | 1.62 |
| -1 | -3 | 11  | 20.11 | 1.20 |
| 1  | -3 | -11 | 18.79 | 1.75 |
| -1 | 3  | -11 | 19.86 | 1.56 |
| -1 | -3 | 11  | 16.80 | 1.27 |
| 2  | 3  | -11 | 1.77  | 0.69 |
| 2  | 3  | -11 | 1.48  | 0.61 |
| -2 | 3  | 11  | 1.78  | 0.59 |
| -2 | -3 | -11 | 0.30  | 0.74 |
| -2 | 3  | 11  | 1.26  | 0.50 |

## CIF S3

|    |    |     |      |      |
|----|----|-----|------|------|
| 2  | -3 | 11  | 1.13 | 0.57 |
| -2 | -3 | 11  | 1.67 | 0.42 |
| 2  | 3  | 11  | 0.52 | 0.48 |
| -2 | -3 | 11  | 1.14 | 0.50 |
| -2 | -3 | 11  | 1.85 | 0.59 |
| 2  | -3 | -11 | 1.88 | 0.91 |
| -2 | 3  | -11 | 0.12 | 0.75 |
| -2 | 3  | -11 | 0.71 | 0.77 |
| -2 | -3 | 11  | 2.05 | 0.37 |
| 2  | -3 | -11 | 0.89 | 1.03 |
| -3 | 3  | 11  | 7.40 | 0.76 |
| -3 | 3  | 11  | 9.11 | 1.00 |
| 3  | 3  | -11 | 7.40 | 0.93 |
| -3 | 3  | 11  | 8.78 | 0.87 |
| 3  | -3 | 11  | 7.98 | 0.90 |
| 3  | 3  | -11 | 8.24 | 0.84 |
| -3 | -3 | -11 | 8.49 | 1.23 |
| 3  | -3 | -11 | 7.65 | 1.34 |
| -3 | -3 | 11  | 8.65 | 0.49 |
| -3 | 3  | -11 | 9.97 | 1.04 |
| 3  | -3 | -11 | 7.16 | 1.17 |
| -3 | -3 | 11  | 9.16 | 0.79 |
| 3  | 3  | 11  | 8.40 | 0.81 |
| -3 | 3  | -11 | 9.61 | 1.18 |
| -3 | -3 | 11  | 8.79 | 0.48 |
| -3 | -3 | 11  | 8.42 | 0.67 |
| -3 | 3  | -11 | 7.50 | 1.32 |
| -3 | -3 | 11  | 7.83 | 0.85 |
| -4 | -3 | -11 | 5.58 | 1.20 |
| 4  | -3 | 11  | 5.75 | 0.96 |
| -4 | 3  | 11  | 5.73 | 0.94 |
| -4 | 3  | 11  | 6.74 | 0.84 |
| -4 | 3  | -11 | 6.34 | 1.04 |
| -4 | -3 | 11  | 6.45 | 0.65 |
| -4 | 3  | -11 | 5.89 | 1.05 |
| 4  | 3  | 11  | 6.24 | 0.77 |
| -4 | -3 | 11  | 7.18 | 0.89 |
| 4  | -3 | -11 | 6.02 | 1.33 |
| -4 | 3  | -11 | 5.13 | 1.22 |
| 4  | -3 | -11 | 4.72 | 1.15 |
| -4 | -3 | 11  | 6.42 | 0.56 |

## CIF S3

|    |    |     |       |      |
|----|----|-----|-------|------|
| -5 | 3  | 11  | 1.32  | 0.54 |
| 5  | -3 | 11  | 1.23  | 0.70 |
| -5 | 3  | 11  | 0.42  | 0.42 |
| -5 | -3 | -11 | 1.19  | 0.85 |
| -5 | -3 | -11 | 1.57  | 0.66 |
| 5  | -3 | -11 | 0.33  | 1.01 |
| -5 | -3 | 11  | 1.54  | 0.33 |
| -5 | -3 | 11  | 1.79  | 0.79 |
| -5 | 3  | -11 | 1.67  | 0.97 |
| -5 | 3  | -11 | 1.58  | 0.84 |
| -6 | -3 | -11 | -1.60 | 1.03 |
| -6 | 3  | 11  | 0.52  | 0.37 |
| -6 | 3  | 11  | -0.01 | 0.43 |
| -6 | -3 | -11 | -0.02 | 0.44 |
| -6 | 3  | 11  | 0.01  | 0.34 |
| -6 | 3  | 11  | 0.17  | 0.33 |
| 6  | -3 | 11  | 1.13  | 0.57 |
| -6 | -3 | -11 | 1.11  | 1.22 |
| -6 | -3 | -11 | 1.02  | 0.61 |
| -6 | -3 | -11 | 0.73  | 0.57 |
| -6 | 3  | -11 | 0.43  | 1.04 |
| -6 | 3  | -11 | -0.05 | 0.60 |
| -6 | 3  | -11 | -0.39 | 0.96 |
| 6  | 3  | 11  | 0.19  | 0.47 |
| -6 | 3  | -11 | -0.25 | 0.68 |
| -7 | 3  | 11  | 0.86  | 0.31 |
| -7 | -3 | -11 | 1.25  | 1.55 |
| -7 | -3 | -11 | -0.77 | 0.87 |
| -7 | -3 | -11 | 0.96  | 0.54 |
| 7  | -3 | 11  | 0.91  | 0.56 |
| -7 | -3 | -11 | 0.00  | 0.73 |
| -7 | 3  | 11  | 0.79  | 0.30 |
| -7 | -3 | -11 | 1.02  | 1.03 |
| -7 | -3 | -11 | 0.98  | 0.61 |
| -7 | 3  | -11 | 0.18  | 0.53 |
| -7 | 3  | -11 | 1.79  | 0.92 |
| -7 | 3  | -11 | 1.32  | 0.37 |
| 7  | 3  | 11  | 0.69  | 0.46 |
| -7 | 3  | -11 | 0.43  | 0.55 |
| 8  | -3 | 11  | 4.01  | 0.74 |
| -8 | -3 | -11 | 3.19  | 0.72 |

## CIF S3

|    |    |     |       |      |
|----|----|-----|-------|------|
| -8 | -3 | -11 | 5.31  | 0.72 |
| -8 | -3 | -11 | 5.20  | 0.71 |
| -8 | -3 | -11 | 2.77  | 0.91 |
| -8 | -3 | -11 | 3.60  | 1.09 |
| -8 | -3 | -11 | 4.07  | 0.77 |
| -8 | 3  | -11 | 4.36  | 1.20 |
| 8  | 3  | 11  | 3.92  | 0.75 |
| -8 | 3  | -11 | 4.69  | 0.81 |
| -8 | 3  | -11 | 4.03  | 0.75 |
| -9 | -3 | -11 | 3.23  | 0.51 |
| -9 | -3 | -11 | 2.69  | 0.52 |
| -9 | -3 | -11 | 1.90  | 0.55 |
| 9  | -3 | 11  | 2.50  | 0.47 |
| -9 | -3 | -11 | 3.01  | 0.53 |
| -9 | 3  | -11 | 4.30  | 0.59 |
| 9  | 3  | 11  | 2.76  | 0.52 |
| -9 | 3  | -11 | 3.38  | 0.52 |
| -9 | 3  | -11 | 2.70  | 0.52 |
| -9 | 3  | -11 | 2.95  | 0.87 |
| 0  | -4 | -11 | 1.41  | 0.96 |
| 0  | -4 | 11  | 0.58  | 0.54 |
| 0  | 4  | -11 | 0.23  | 0.66 |
| 0  | -4 | 11  | 0.20  | 0.44 |
| 0  | 4  | -11 | 0.86  | 0.75 |
| 0  | -4 | 11  | 0.55  | 0.59 |
| 0  | 4  | 11  | 0.05  | 0.42 |
| 1  | -4 | 11  | 2.32  | 0.53 |
| 1  | -4 | 11  | 2.31  | 0.59 |
| -1 | 4  | 11  | 2.18  | 0.50 |
| 1  | 4  | -11 | 1.95  | 0.75 |
| 1  | 4  | -11 | 2.65  | 0.74 |
| -1 | 4  | 11  | 2.24  | 0.59 |
| 1  | 4  | 11  | 2.35  | 0.56 |
| -1 | -4 | 11  | 3.37  | 0.76 |
| -1 | -4 | 11  | 2.75  | 0.60 |
| -1 | 4  | -11 | 2.96  | 1.01 |
| 1  | -4 | -11 | 1.29  | 1.16 |
| -1 | 4  | -11 | 1.86  | 0.75 |
| 1  | -4 | -11 | 2.48  | 1.08 |
| 2  | -4 | 11  | 8.61  | 1.01 |
| -2 | 4  | 11  | 10.80 | 1.00 |

## CIF S3

|    |    |     |       |      |
|----|----|-----|-------|------|
| -2 | 4  | 11  | 10.33 | 0.87 |
| 2  | 4  | -11 | 12.11 | 1.02 |
| -2 | -4 | -11 | 11.53 | 1.33 |
| 2  | -4 | 11  | 11.04 | 1.03 |
| 2  | 4  | -11 | 11.45 | 1.11 |
| -2 | -4 | 11  | 10.76 | 0.82 |
| -2 | -4 | 11  | 10.64 | 0.71 |
| -2 | 4  | -11 | 10.09 | 1.14 |
| 2  | 4  | 11  | 10.96 | 0.91 |
| 2  | -4 | -11 | 9.82  | 1.51 |
| -2 | -4 | 11  | 11.06 | 0.91 |
| -2 | -4 | 11  | 11.14 | 0.90 |
| 2  | -4 | -11 | 11.26 | 1.35 |
| -2 | 4  | -11 | 10.44 | 1.19 |
| 3  | -4 | 11  | 21.96 | 1.44 |
| 3  | 4  | -11 | 22.16 | 1.51 |
| 3  | 4  | -11 | 21.62 | 1.40 |
| -3 | 4  | 11  | 20.97 | 1.39 |
| -3 | -4 | -11 | 22.61 | 1.74 |
| -3 | 4  | 11  | 20.96 | 1.29 |
| 3  | -4 | -11 | 18.88 | 1.90 |
| -3 | -4 | 11  | 21.69 | 1.32 |
| 3  | -4 | -11 | 18.03 | 1.73 |
| 3  | 4  | 11  | 22.43 | 1.39 |
| -3 | -4 | 11  | 22.09 | 1.25 |
| -3 | 4  | -11 | 20.67 | 1.79 |
| -3 | 4  | -11 | 22.48 | 1.55 |
| -3 | -4 | 11  | 20.21 | 1.38 |
| -3 | 4  | -11 | 24.33 | 1.74 |
| -4 | 4  | 11  | -0.17 | 0.85 |
| -4 | 4  | 11  | 1.15  | 0.59 |
| -4 | 4  | 11  | 1.33  | 0.52 |
| -4 | -4 | -11 | 1.14  | 0.88 |
| 4  | -4 | 11  | 2.08  | 0.68 |
| -4 | 4  | -11 | 1.17  | 0.77 |
| -4 | -4 | 11  | 2.26  | 0.54 |
| 4  | -4 | -11 | 1.02  | 1.03 |
| 4  | 4  | 11  | 1.23  | 0.63 |
| -4 | 4  | -11 | 2.04  | 0.83 |
| -4 | 4  | -11 | 1.22  | 1.01 |
| -4 | -4 | 11  | 2.57  | 0.72 |



## CIF S3

|    |    |     |       |      |
|----|----|-----|-------|------|
| -4 | -4 | 11  | 5.21  | 1.08 |
| -4 | -4 | 11  | 2.19  | 0.50 |
| 4  | -4 | -11 | 1.77  | 1.21 |
| -5 | 4  | 11  | 0.40  | 0.56 |
| -5 | -4 | -11 | 0.22  | 0.59 |
| -5 | -4 | -11 | -0.96 | 0.82 |
| 5  | -4 | 11  | 0.54  | 0.68 |
| -5 | -4 | 11  | -0.43 | 0.28 |
| -5 | -4 | 11  | 0.09  | 0.79 |
| -5 | 4  | -11 | -0.74 | 0.84 |
| -5 | 4  | -11 | -0.09 | 0.69 |
| -6 | -4 | -11 | 1.15  | 0.60 |
| 6  | -4 | 11  | 2.41  | 0.58 |
| -6 | 4  | 11  | 1.83  | 0.52 |
| -6 | -4 | -11 | 2.66  | 0.71 |
| -6 | -4 | -11 | 2.38  | 0.64 |
| -6 | 4  | 11  | 2.44  | 0.56 |
| -6 | 4  | 11  | 1.82  | 0.45 |
| -6 | 4  | 11  | 2.02  | 0.52 |
| -6 | 4  | 11  | 2.33  | 0.42 |
| -6 | -4 | -11 | 1.19  | 1.04 |
| -6 | 4  | -11 | 1.95  | 1.01 |
| -6 | 4  | -11 | 1.44  | 0.70 |
| -6 | 4  | -11 | 0.54  | 0.70 |
| 6  | 4  | 11  | 1.87  | 0.53 |
| -7 | -4 | -11 | 8.66  | 1.51 |
| -7 | -4 | -11 | 8.28  | 1.28 |
| 7  | -4 | 11  | 9.14  | 0.96 |
| -7 | -4 | -11 | 8.55  | 0.98 |
| -7 | 4  | 11  | 9.27  | 0.69 |
| -7 | -4 | -11 | 8.26  | 0.95 |
| -7 | -4 | -11 | 8.34  | 0.97 |
| -7 | -4 | -11 | 7.19  | 1.27 |
| -7 | 4  | -11 | 8.59  | 1.43 |
| -7 | 4  | -11 | 8.93  | 0.99 |
| 7  | 4  | 11  | 8.27  | 0.96 |
| -7 | 4  | -11 | 9.41  | 0.73 |
| -7 | 4  | -11 | 7.55  | 0.93 |
| -8 | -4 | -11 | 3.80  | 0.74 |
| -8 | 4  | 11  | 3.61  | 0.33 |
| -8 | -4 | -11 | 4.15  | 1.14 |

## CIF S3

|    |    |     |       |      |
|----|----|-----|-------|------|
| -8 | 4  | 11  | 3.95  | 0.35 |
| -8 | 4  | 11  | 3.72  | 0.36 |
| -8 | -4 | -11 | 3.85  | 0.67 |
| 8  | -4 | 11  | 3.52  | 0.63 |
| -8 | -4 | -11 | 3.74  | 0.70 |
| -8 | -4 | -11 | 3.70  | 0.73 |
| -8 | 4  | -11 | 3.54  | 0.76 |
| -8 | 4  | -11 | 5.32  | 1.08 |
| -8 | 4  | -11 | 4.62  | 0.85 |
| 8  | 4  | 11  | 4.41  | 0.73 |
| -9 | -4 | -11 | 2.41  | 0.69 |
| -9 | -4 | -11 | 3.73  | 0.49 |
| -9 | -4 | -11 | 2.38  | 0.51 |
| -9 | 4  | -11 | 4.96  | 0.67 |
| 9  | 4  | 11  | 3.28  | 0.50 |
| -9 | 4  | -11 | 3.72  | 0.48 |
| -9 | 4  | -11 | 3.39  | 0.92 |
| 9  | 4  | 11  | 4.25  | 0.45 |
| 0  | 5  | 11  | 17.97 | 1.13 |
| 0  | 5  | 11  | 15.47 | 1.19 |
| 0  | -5 | 11  | 17.19 | 1.18 |
| 0  | -5 | 11  | 16.64 | 1.17 |
| 0  | 5  | -11 | 18.34 | 1.44 |
| 0  | -5 | 11  | 18.56 | 1.32 |
| 0  | -5 | -11 | 14.00 | 1.63 |
| 0  | -5 | 11  | 17.77 | 1.38 |
| 0  | 5  | -11 | 18.96 | 1.52 |
| -1 | 5  | 11  | 4.50  | 0.77 |
| 1  | -5 | 11  | 4.34  | 0.72 |
| 1  | 5  | -11 | 5.46  | 0.92 |
| 1  | 5  | -11 | 3.78  | 0.90 |
| 1  | -5 | 11  | 3.47  | 0.76 |
| -1 | 5  | 11  | 5.21  | 0.69 |
| 1  | -5 | 11  | 5.56  | 0.82 |
| -1 | 5  | -11 | 4.74  | 1.08 |
| 1  | -5 | -11 | 4.29  | 1.29 |
| 1  | 5  | 11  | 4.64  | 0.70 |
| -1 | -5 | 11  | 4.44  | 0.69 |
| -1 | 5  | -11 | 4.14  | 1.04 |
| -1 | -5 | 11  | 4.68  | 0.70 |
| -1 | -5 | 11  | 5.18  | 0.87 |

## CIF S3

|    |    |     |       |      |
|----|----|-----|-------|------|
| 1  | -5 | -11 | 3.77  | 1.31 |
| 2  | -5 | 11  | 3.56  | 0.92 |
| 2  | 5  | -11 | 3.95  | 0.90 |
| 2  | 5  | -11 | 4.33  | 0.87 |
| -2 | 5  | 11  | 5.08  | 0.77 |
| -2 | 5  | 11  | 4.18  | 0.89 |
| 2  | -5 | 11  | 4.17  | 0.83 |
| -2 | -5 | -11 | 4.52  | 1.26 |
| 2  | -5 | 11  | 5.71  | 0.82 |
| 2  | 5  | 11  | 3.92  | 0.80 |
| -2 | 5  | -11 | 5.27  | 1.18 |
| -2 | -5 | 11  | 4.44  | 0.63 |
| -2 | -5 | 11  | 4.18  | 0.49 |
| 2  | -5 | -11 | 4.08  | 1.40 |
| 2  | -5 | -11 | 2.63  | 1.17 |
| -2 | -5 | 11  | 3.62  | 0.67 |
| -2 | -5 | 11  | 5.52  | 0.73 |
| -2 | 5  | -11 | 6.30  | 1.44 |
| 3  | 5  | -11 | 17.60 | 1.28 |
| -3 | 5  | 11  | 15.87 | 1.15 |
| 3  | 5  | -11 | 18.22 | 1.36 |
| -3 | -5 | -11 | 17.11 | 1.60 |
| 3  | -5 | 11  | 17.04 | 1.35 |
| -3 | 5  | 11  | 17.91 | 1.25 |
| 3  | 5  | 11  | 17.65 | 1.25 |
| -3 | 5  | -11 | 15.44 | 1.55 |
| -3 | -5 | 11  | 19.83 | 1.08 |
| -3 | -5 | 11  | 16.60 | 0.99 |
| 3  | -5 | -11 | 17.27 | 1.69 |
| -3 | -5 | 11  | 20.26 | 1.16 |
| -3 | 5  | -11 | 16.23 | 1.33 |
| 3  | -5 | -11 | 15.89 | 1.85 |
| -3 | -5 | 11  | 17.18 | 1.31 |
| -4 | -5 | -11 | 1.48  | 0.80 |
| 4  | -5 | 11  | 1.81  | 0.80 |
| -4 | 5  | 11  | 2.41  | 0.97 |
| -4 | -5 | -11 | 0.40  | 0.91 |
| -4 | 5  | 11  | 1.26  | 0.56 |
| -4 | 5  | 11  | 1.11  | 0.66 |
| -4 | -5 | -11 | 2.29  | 0.95 |
| -4 | 5  | -11 | -0.26 | 0.92 |

## CIF S3

|    |    |     |      |      |
|----|----|-----|------|------|
| -4 | -5 | 11  | 1.15 | 0.67 |
| -4 | -5 | 11  | 5.97 | 1.09 |
| -4 | -5 | 11  | 1.39 | 0.46 |
| 4  | -5 | -11 | 0.71 | 1.15 |
| -4 | 5  | -11 | 1.42 | 0.88 |
| -4 | 5  | -11 | 1.17 | 0.75 |
| -4 | -5 | 11  | 1.40 | 0.39 |
| -5 | 5  | 11  | 1.00 | 0.54 |
| -5 | -5 | -11 | 0.60 | 0.89 |
| 5  | -5 | 11  | 1.64 | 0.52 |
| -5 | 5  | 11  | 1.11 | 0.53 |
| -5 | -5 | -11 | 1.79 | 0.70 |
| -5 | -5 | -11 | 2.30 | 1.14 |
| -5 | 5  | 11  | 2.03 | 0.62 |
| -5 | -5 | -11 | 1.33 | 0.60 |
| 5  | -5 | 11  | 1.32 | 0.71 |
| -5 | -5 | -11 | 1.97 | 0.74 |
| -5 | 5  | -11 | 1.20 | 0.82 |
| -5 | -5 | 11  | 2.17 | 0.45 |
| -5 | -5 | 11  | 1.48 | 0.25 |
| -5 | -5 | 11  | 1.83 | 0.90 |
| -5 | 5  | -11 | 1.30 | 0.97 |
| -5 | -5 | 11  | 1.87 | 0.40 |
| 5  | 5  | 11  | 1.24 | 0.51 |
| -5 | -5 | 11  | 1.60 | 0.37 |
| -5 | 5  | -11 | 1.50 | 0.72 |
| 6  | -5 | 11  | 1.99 | 0.53 |
| -6 | -5 | -11 | 1.97 | 1.02 |
| -6 | 5  | 11  | 1.33 | 0.45 |
| -6 | -5 | -11 | 2.19 | 0.99 |
| -6 | 5  | 11  | 2.11 | 0.55 |
| -6 | 5  | 11  | 1.25 | 0.53 |
| -6 | -5 | -11 | 2.27 | 0.84 |
| -6 | -5 | -11 | 2.98 | 0.73 |
| -6 | 5  | 11  | 1.14 | 0.45 |
| -6 | -5 | -11 | 1.71 | 0.60 |
| -6 | 5  | 11  | 2.04 | 0.47 |
| -6 | 5  | -11 | 3.39 | 0.99 |
| -6 | 5  | -11 | 1.65 | 1.08 |
| 6  | 5  | 11  | 1.53 | 0.50 |
| -7 | 5  | 11  | 1.04 | 0.44 |

## CIF S3

|    |    |     |       |      |
|----|----|-----|-------|------|
| -7 | -5 | -11 | 0.38  | 0.94 |
| -7 | -5 | -11 | 1.23  | 0.57 |
| 7  | -5 | 11  | 0.71  | 0.45 |
| -7 | -5 | -11 | 0.78  | 0.50 |
| -7 | -5 | -11 | 0.26  | 0.49 |
| -7 | 5  | 11  | 0.82  | 0.24 |
| -7 | -5 | -11 | 0.93  | 0.58 |
| -7 | -5 | -11 | 0.36  | 0.96 |
| -7 | 5  | 11  | 0.53  | 0.36 |
| -7 | 5  | -11 | 0.06  | 0.53 |
| -7 | 5  | -11 | 1.31  | 0.60 |
| -7 | 5  | -11 | 0.27  | 0.32 |
| 7  | 5  | 11  | 0.77  | 0.48 |
| -7 | 5  | -11 | 2.11  | 0.87 |
| 8  | -5 | 11  | 2.91  | 0.48 |
| -8 | 5  | 11  | 3.13  | 0.49 |
| -8 | 5  | 11  | 2.55  | 0.35 |
| -8 | -5 | -11 | 1.59  | 0.76 |
| -8 | -5 | -11 | 2.68  | 0.78 |
| -8 | -5 | -11 | 3.10  | 0.65 |
| -8 | 5  | 11  | 2.65  | 0.38 |
| -8 | -5 | -11 | 3.33  | 0.61 |
| -8 | 5  | -11 | 3.21  | 0.70 |
| -8 | 5  | -11 | 3.64  | 0.64 |
| 8  | 5  | 11  | 3.07  | 0.60 |
| 8  | 5  | 11  | 3.10  | 0.69 |
| 0  | -6 | 11  | -0.39 | 0.69 |
| 0  | 6  | -11 | -0.44 | 0.77 |
| 0  | 6  | 11  | 0.20  | 0.49 |
| 0  | -6 | 11  | 0.15  | 0.63 |
| 0  | 6  | -11 | -0.78 | 0.72 |
| 0  | -6 | 11  | -0.04 | 0.84 |
| 0  | 6  | 11  | 0.01  | 0.50 |
| 0  | -6 | 11  | -0.13 | 0.53 |
| 1  | 6  | -11 | 4.32  | 0.97 |
| -1 | 6  | 11  | 1.38  | 0.60 |
| 1  | -6 | 11  | 3.21  | 0.69 |
| 1  | -6 | 11  | 4.08  | 1.03 |
| 1  | 6  | -11 | 2.83  | 0.99 |
| 1  | -6 | 11  | 3.05  | 0.74 |
| 1  | -6 | 11  | 2.73  | 0.82 |

## CIF S3

|    |    |     |       |      |
|----|----|-----|-------|------|
| -1 | -6 | -11 | 2.09  | 1.14 |
| -1 | 6  | 11  | 2.82  | 0.64 |
| -1 | 6  | -11 | 1.00  | 0.83 |
| -1 | -6 | 11  | 2.56  | 0.72 |
| -1 | -6 | 11  | 3.07  | 0.72 |
| 1  | 6  | 11  | 2.96  | 0.70 |
| -1 | 6  | -11 | 2.22  | 1.46 |
| 1  | -6 | -11 | 3.97  | 1.33 |
| -1 | -6 | 11  | 3.43  | 0.84 |
| 2  | 6  | -11 | 1.48  | 0.73 |
| 2  | -6 | 11  | 0.93  | 0.65 |
| -2 | 6  | 11  | 0.81  | 0.83 |
| 2  | 6  | -11 | 1.43  | 0.72 |
| -2 | -6 | -11 | 1.24  | 1.08 |
| 2  | -6 | 11  | 0.69  | 0.67 |
| 2  | -6 | 11  | 2.07  | 0.72 |
| -2 | 6  | 11  | 0.71  | 0.54 |
| -2 | 6  | -11 | 0.84  | 0.80 |
| 2  | -6 | -11 | 4.36  | 1.47 |
| -2 | -6 | 11  | 1.84  | 0.60 |
| -2 | -6 | 11  | 2.83  | 0.65 |
| -2 | -6 | 11  | 1.82  | 0.64 |
| 2  | -6 | -11 | 0.73  | 1.26 |
| 2  | 6  | 11  | 1.34  | 0.59 |
| 3  | -6 | 11  | 0.62  | 0.73 |
| -3 | 6  | 11  | 0.84  | 0.68 |
| 3  | 6  | -11 | 0.01  | 0.59 |
| -3 | 6  | 11  | 1.52  | 0.60 |
| -3 | -6 | -11 | 0.70  | 1.00 |
| -3 | -6 | 11  | 1.29  | 0.57 |
| -3 | -6 | 11  | 1.44  | 0.40 |
| 3  | 6  | 11  | 1.85  | 0.69 |
| -3 | -6 | 11  | 1.91  | 0.64 |
| 3  | -6 | -11 | 1.59  | 1.27 |
| -3 | -6 | 11  | 1.27  | 0.47 |
| -3 | 6  | -11 | 1.29  | 0.94 |
| -3 | 6  | -11 | 1.18  | 0.73 |
| -4 | -6 | -11 | 20.17 | 1.62 |
| 4  | -6 | 11  | 20.40 | 1.61 |
| -4 | 6  | 11  | 19.61 | 1.47 |
| -4 | -6 | -11 | 20.11 | 1.44 |

## CIF S3

|    |    |     |       |      |
|----|----|-----|-------|------|
| -4 | 6  | 11  | 20.66 | 1.31 |
| -4 | 6  | -11 | 21.79 | 1.69 |
| -4 | -6 | 11  | 20.90 | 1.46 |
| -4 | -6 | 11  | 20.97 | 1.66 |
| -4 | 6  | -11 | 18.31 | 1.52 |
| -4 | -6 | 11  | 21.14 | 1.22 |
| -4 | -6 | 11  | 20.64 | 1.20 |
| -5 | -6 | -11 | 25.35 | 1.67 |
| -5 | -6 | -11 | 25.64 | 2.00 |
| -5 | 6  | 11  | 26.95 | 1.62 |
| -5 | 6  | 11  | 26.46 | 1.53 |
| -5 | 6  | 11  | 28.75 | 1.66 |
| -5 | -6 | -11 | 25.81 | 1.60 |
| 5  | -6 | 11  | 24.82 | 1.75 |
| -5 | 6  | 11  | 28.05 | 1.85 |
| -5 | 6  | 11  | 26.58 | 1.59 |
| -5 | -6 | -11 | 25.98 | 1.70 |
| 5  | 6  | 11  | 25.12 | 1.51 |
| 5  | 6  | 11  | 25.58 | 1.62 |
| -5 | -6 | 11  | 27.07 | 1.37 |
| -5 | 6  | -11 | 20.71 | 2.16 |
| -5 | -6 | 11  | 25.41 | 1.68 |
| -5 | -6 | 11  | 26.13 | 1.36 |
| -5 | 6  | -11 | 25.76 | 1.95 |
| -6 | 6  | 11  | 7.02  | 0.88 |
| -6 | -6 | -11 | 7.15  | 1.00 |
| -6 | -6 | -11 | 6.95  | 0.99 |
| -6 | -6 | -11 | 6.19  | 1.36 |
| -6 | -6 | -11 | 5.58  | 1.38 |
| -6 | 6  | 11  | 6.77  | 0.79 |
| -6 | 6  | 11  | 6.23  | 0.79 |
| -6 | -6 | -11 | 7.51  | 1.00 |
| 6  | -6 | 11  | 5.50  | 0.92 |
| 6  | 6  | 11  | 7.06  | 0.79 |
| 6  | 6  | 11  | 6.64  | 0.91 |
| -6 | 6  | -11 | 5.75  | 1.31 |
| -6 | 6  | -11 | 2.90  | 1.07 |
| -7 | -6 | -11 | 6.73  | 1.00 |
| -7 | -6 | -11 | 6.80  | 0.96 |
| -7 | 6  | 11  | 8.04  | 0.67 |
| -7 | 6  | 11  | 7.45  | 0.73 |

## CIF S3

|    |    |     |       |      |
|----|----|-----|-------|------|
| -7 | -6 | -11 | 7.07  | 0.84 |
| -7 | 6  | 11  | 8.10  | 0.56 |
| -7 | -6 | -11 | 7.27  | 0.68 |
| -7 | -6 | -11 | 8.18  | 1.34 |
| -7 | -6 | -11 | 7.88  | 0.82 |
| -7 | -6 | -11 | 10.41 | 1.42 |
| 7  | 6  | 11  | 7.82  | 0.92 |
| -7 | 6  | -11 | 7.52  | 0.60 |
| 7  | 6  | 11  | 7.13  | 0.79 |
| -7 | 6  | -11 | 6.58  | 1.20 |
| -7 | 6  | -11 | 6.41  | 0.84 |
| -8 | -6 | -11 | 6.93  | 0.77 |
| -8 | 6  | 11  | 6.73  | 0.47 |
| -8 | 6  | 11  | 5.29  | 0.49 |
| -8 | -6 | -11 | 7.80  | 0.67 |
| -8 | -6 | -11 | 6.93  | 0.91 |
| 8  | 6  | 11  | 7.65  | 0.66 |
| 8  | 6  | 11  | 7.52  | 0.62 |
| -8 | 6  | -11 | 5.72  | 0.82 |
| -8 | 6  | -11 | 6.99  | 0.68 |
| 0  | 7  | -11 | 0.80  | 0.93 |
| 0  | 7  | -11 | 0.34  | 0.88 |
| 0  | 7  | 11  | 0.19  | 0.58 |
| 0  | -7 | 11  | -0.08 | 0.56 |
| 0  | -7 | 11  | 0.78  | 0.76 |
| 0  | -7 | 11  | 1.52  | 0.78 |
| 0  | -7 | 11  | 0.02  | 0.61 |
| 0  | 7  | 11  | 0.30  | 0.59 |
| 0  | -7 | 11  | -0.19 | 0.61 |
| 1  | -7 | 11  | 7.83  | 1.10 |
| 1  | -7 | 11  | 5.32  | 0.86 |
| 1  | -7 | 11  | 6.54  | 0.96 |
| 1  | -7 | 11  | 5.94  | 0.84 |
| -1 | 7  | 11  | 4.93  | 0.80 |
| -1 | -7 | -11 | 7.50  | 1.32 |
| 1  | 7  | -11 | 6.71  | 1.12 |
| -1 | 7  | 11  | 6.59  | 0.96 |
| -1 | -7 | 11  | 6.26  | 0.79 |
| -1 | -7 | 11  | 6.47  | 1.02 |
| -1 | -7 | 11  | 5.55  | 0.85 |
| -1 | 7  | -11 | 6.53  | 1.10 |



## CIF S3

|    |    |     |       |      |
|----|----|-----|-------|------|
| -1 | -7 | 11  | 5.25  | 1.00 |
| 1  | 7  | 11  | 5.17  | 0.82 |
| 1  | -7 | -11 | 4.38  | 1.78 |
| -1 | -7 | 11  | 6.00  | 0.68 |
| 2  | -7 | 11  | 11.31 | 1.18 |
| 2  | -7 | 11  | 9.01  | 1.10 |
| 2  | 7  | -11 | 10.82 | 1.18 |
| 2  | -7 | 11  | 11.92 | 1.38 |
| -2 | 7  | 11  | 9.35  | 0.94 |
| 2  | -7 | 11  | 10.52 | 1.10 |
| -2 | 7  | 11  | 10.12 | 0.94 |
| -2 | -7 | -11 | 7.29  | 1.34 |
| 2  | 7  | 11  | 8.52  | 0.96 |
| -2 | -7 | 11  | 9.61  | 1.04 |
| -2 | -7 | 11  | 10.52 | 0.72 |
| -2 | -7 | 11  | 10.09 | 1.03 |
| -2 | -7 | 11  | 10.09 | 0.95 |
| 2  | -7 | -11 | 5.61  | 1.40 |
| -2 | -7 | 11  | 10.40 | 1.02 |
| -2 | 7  | -11 | 8.92  | 1.40 |
| -3 | -7 | -11 | 1.42  | 1.05 |
| 3  | -7 | 11  | 3.55  | 0.82 |
| -3 | 7  | 11  | 2.15  | 0.65 |
| 3  | -7 | 11  | 1.75  | 1.02 |
| 3  | -7 | 11  | 0.70  | 1.20 |
| 3  | -7 | 11  | 4.03  | 1.08 |
| -3 | 7  | 11  | 1.88  | 0.71 |
| -3 | -7 | 11  | 3.02  | 0.64 |
| 3  | 7  | 11  | 0.94  | 0.64 |
| -3 | -7 | 11  | 3.67  | 0.70 |
| -3 | -7 | 11  | 3.16  | 0.74 |
| -4 | 7  | 11  | 23.18 | 1.45 |
| 4  | -7 | 11  | 20.31 | 1.63 |
| -4 | -7 | -11 | 25.50 | 1.65 |
| -4 | 7  | 11  | 24.76 | 1.61 |
| -4 | -7 | -11 | 23.35 | 1.77 |
| -4 | 7  | 11  | 23.28 | 1.60 |
| 4  | -7 | 11  | 23.24 | 1.91 |
| -4 | 7  | 11  | 24.60 | 1.61 |
| 4  | -7 | 11  | 27.27 | 1.73 |
| -4 | 7  | 11  | 24.20 | 1.55 |

## CIF S3

|    |    |     |       |      |
|----|----|-----|-------|------|
| -4 | 7  | 11  | 22.83 | 1.50 |
| -4 | -7 | -11 | 24.44 | 1.72 |
| -4 | 7  | -11 | 24.53 | 1.70 |
| -4 | 7  | -11 | 25.66 | 1.84 |
| 4  | 7  | 11  | 23.54 | 1.42 |
| -4 | -7 | 11  | 23.98 | 1.36 |
| 4  | 7  | 11  | 22.03 | 1.52 |
| -4 | -7 | 11  | 21.89 | 1.30 |
| -4 | -7 | 11  | 22.37 | 1.27 |
| -4 | -7 | 11  | 20.92 | 1.35 |
| -5 | 7  | 11  | 9.07  | 1.07 |
| -5 | 7  | 11  | 11.01 | 1.01 |
| -5 | -7 | -11 | 10.89 | 1.47 |
| 5  | -7 | 11  | 10.12 | 1.47 |
| -5 | -7 | -11 | 10.47 | 0.92 |
| -5 | 7  | 11  | 9.65  | 1.06 |
| -5 | -7 | -11 | 11.60 | 1.28 |
| -5 | -7 | -11 | 9.79  | 1.11 |
| -5 | 7  | 11  | 10.28 | 0.94 |
| -5 | -7 | -11 | 9.49  | 1.19 |
| -5 | 7  | 11  | 9.87  | 0.93 |
| -5 | -7 | 11  | 10.51 | 1.14 |
| 5  | 7  | 11  | 11.19 | 1.03 |
| -5 | -7 | 11  | 9.94  | 0.67 |
| 5  | 7  | 11  | 10.79 | 0.91 |
| -5 | -7 | 11  | 10.81 | 0.67 |
| -5 | 7  | -11 | 9.06  | 1.42 |
| -6 | 7  | 11  | 2.59  | 0.57 |
| -6 | 7  | 11  | 3.70  | 0.81 |
| -6 | -7 | -11 | 3.94  | 0.86 |
| -6 | -7 | -11 | 2.81  | 0.68 |
| -6 | -7 | -11 | 2.39  | 0.92 |
| -6 | 7  | 11  | 4.30  | 0.79 |
| -6 | -7 | -11 | 4.02  | 0.85 |
| -6 | -7 | -11 | 2.62  | 1.00 |
| -6 | 7  | -11 | 2.73  | 0.89 |
| 6  | 7  | 11  | 3.21  | 0.85 |
| 6  | 7  | 11  | 3.65  | 0.69 |
| -6 | 7  | -11 | 1.92  | 1.03 |
| -7 | -7 | -11 | 12.44 | 0.99 |
| -7 | 7  | 11  | 12.82 | 0.84 |

## CIF S3

|    |    |     |       |      |
|----|----|-----|-------|------|
| -7 | -7 | -11 | 12.35 | 1.05 |
| -7 | 7  | 11  | 12.39 | 0.83 |
| -7 | -7 | -11 | 13.35 | 1.13 |
| -7 | 7  | 11  | 13.21 | 0.76 |
| 7  | 7  | 11  | 13.68 | 0.90 |
| 7  | 7  | 11  | 12.55 | 0.96 |
| -7 | 7  | -11 | 11.19 | 1.24 |
| -8 | -7 | -11 | 0.34  | 0.30 |
| -8 | 7  | 11  | -0.03 | 0.18 |
| -8 | -7 | -11 | 0.36  | 0.35 |
| -8 | -7 | -11 | 0.17  | 0.23 |
| -8 | 7  | 11  | -0.07 | 0.18 |
| 8  | 7  | 11  | 0.03  | 0.28 |
| -8 | 7  | -11 | -0.18 | 0.31 |
| 0  | -8 | 11  | 6.39  | 0.87 |
| 0  | -8 | 11  | 4.75  | 1.01 |
| 0  | -8 | 11  | 6.26  | 0.90 |
| 0  | -8 | 11  | 6.78  | 1.14 |
| 0  | -8 | 11  | 4.91  | 1.07 |
| 0  | 8  | 11  | 4.68  | 0.86 |
| -1 | 8  | 11  | 17.49 | 1.30 |
| 1  | -8 | 11  | 15.76 | 1.29 |
| 1  | -8 | 11  | 17.88 | 1.59 |
| -1 | -8 | -11 | 18.69 | 1.85 |
| 1  | -8 | 11  | 18.75 | 1.43 |
| 1  | -8 | 11  | 17.58 | 1.34 |
| -1 | 8  | 11  | 17.39 | 1.32 |
| -1 | -8 | 11  | 16.62 | 1.02 |
| 1  | 8  | 11  | 15.10 | 1.27 |
| -1 | -8 | 11  | 18.52 | 1.36 |
| -1 | -8 | 11  | 17.91 | 1.47 |
| -1 | -8 | 11  | 17.37 | 1.21 |
| -1 | -8 | 11  | 17.37 | 1.32 |
| 2  | -8 | 11  | 9.86  | 1.03 |
| 2  | -8 | 11  | 11.79 | 1.17 |
| -2 | 8  | 11  | 7.70  | 0.92 |
| -2 | -8 | -11 | 9.76  | 1.18 |
| 2  | -8 | 11  | 8.10  | 1.20 |
| -2 | 8  | 11  | 8.51  | 0.76 |
| -2 | 8  | 11  | 10.26 | 1.08 |
| 2  | -8 | 11  | 9.96  | 1.21 |

## CIF S3

|    |    |     |       |      |
|----|----|-----|-------|------|
| -2 | 8  | 11  | 7.25  | 1.13 |
| -2 | -8 | -11 | 9.91  | 1.53 |
| -2 | 8  | 11  | 9.73  | 1.18 |
| 2  | -8 | 11  | 9.50  | 1.16 |
| 2  | -8 | 11  | 10.65 | 1.49 |
| 2  | -8 | 11  | 9.47  | 1.07 |
| -2 | 8  | 11  | 9.67  | 1.07 |
| 2  | -8 | 11  | 6.98  | 1.55 |
| -2 | -8 | 11  | 8.15  | 1.01 |
| 2  | 8  | 11  | 8.98  | 0.95 |
| -2 | -8 | 11  | 8.21  | 1.04 |
| -2 | -8 | 11  | 9.24  | 1.11 |
| -2 | -8 | 11  | 8.75  | 0.97 |
| -2 | -8 | 11  | 8.38  | 0.92 |
| -2 | -8 | 11  | 8.93  | 0.86 |
| 2  | 8  | 11  | 7.69  | 1.03 |
| -2 | -8 | 11  | 7.98  | 0.72 |
| 3  | -8 | 11  | 19.70 | 1.43 |
| -3 | -8 | -11 | 18.58 | 1.88 |
| -3 | -8 | -11 | 17.20 | 1.45 |
| -3 | 8  | 11  | 22.07 | 1.49 |
| 3  | -8 | 11  | 20.40 | 1.50 |
| -3 | 8  | 11  | 18.73 | 1.34 |
| 3  | -8 | 11  | 18.03 | 1.54 |
| 3  | -8 | 11  | 18.01 | 1.73 |
| -3 | -8 | -11 | 17.19 | 1.33 |
| -3 | 8  | 11  | 17.25 | 1.34 |
| 3  | -8 | 11  | 22.48 | 1.52 |
| 3  | -8 | 11  | 16.80 | 1.28 |
| -3 | 8  | 11  | 17.81 | 1.34 |
| -3 | 8  | 11  | 18.60 | 1.38 |
| 3  | -8 | 11  | 20.37 | 1.70 |
| -3 | -8 | 11  | 19.20 | 1.25 |
| -3 | -8 | 11  | 17.63 | 1.18 |
| 3  | 8  | 11  | 13.70 | 1.33 |
| 3  | 8  | 11  | 17.81 | 1.24 |
| -3 | -8 | 11  | 18.14 | 1.34 |
| -3 | -8 | 11  | 16.92 | 1.13 |
| -3 | -8 | 11  | 17.69 | 1.23 |
| -3 | -8 | 11  | 16.49 | 1.16 |
| -4 | -8 | -11 | 4.44  | 1.04 |

## CIF S3

|    |    |     |       |      |
|----|----|-----|-------|------|
| -4 | 8  | 11  | 4.09  | 1.02 |
| -4 | 8  | 11  | 4.62  | 0.98 |
| -4 | -8 | -11 | 3.45  | 1.10 |
| -4 | -8 | -11 | 3.93  | 1.22 |
| -4 | -8 | -11 | 3.31  | 0.92 |
| 4  | -8 | 11  | 3.84  | 1.06 |
| -4 | 8  | 11  | 3.79  | 0.84 |
| -4 | 8  | 11  | 4.78  | 0.81 |
| -4 | 8  | 11  | 4.10  | 0.93 |
| -4 | 8  | 11  | 4.98  | 0.97 |
| -4 | 8  | 11  | 5.10  | 1.07 |
| -4 | -8 | 11  | 2.81  | 0.63 |
| -4 | -8 | 11  | 3.27  | 0.64 |
| 4  | 8  | 11  | 3.07  | 0.79 |
| -4 | -8 | 11  | 3.62  | 0.55 |
| -5 | -8 | -11 | 6.77  | 0.98 |
| -5 | -8 | -11 | 7.19  | 1.04 |
| -5 | -8 | -11 | 7.27  | 1.09 |
| -5 | -8 | -11 | 5.52  | 1.20 |
| -5 | 8  | 11  | 5.77  | 0.99 |
| -5 | -8 | -11 | 7.97  | 1.11 |
| -5 | 8  | 11  | 5.89  | 0.88 |
| -5 | -8 | -11 | 5.64  | 1.32 |
| -5 | 8  | 11  | 5.92  | 0.79 |
| -5 | 8  | 11  | 7.35  | 0.83 |
| 5  | 8  | 11  | 5.74  | 0.82 |
| -5 | -8 | 11  | 6.40  | 0.52 |
| -5 | -8 | 11  | 7.19  | 0.53 |
| -5 | -8 | 11  | 6.83  | 1.01 |
| -5 | 8  | -11 | 6.79  | 1.20 |
| -6 | 8  | 11  | 8.31  | 0.85 |
| -6 | -8 | -11 | 10.13 | 0.96 |
| -6 | 8  | 11  | 9.16  | 0.98 |
| -6 | -8 | -11 | 8.70  | 0.84 |
| -6 | -8 | -11 | 7.90  | 0.89 |
| -6 | -8 | -11 | 9.99  | 1.16 |
| -6 | 8  | 11  | 10.41 | 0.88 |
| -6 | 8  | -11 | 6.91  | 0.98 |
| -6 | 8  | -11 | 8.48  | 1.16 |
| 6  | 8  | 11  | 10.03 | 0.83 |
| -7 | -8 | -11 | 0.05  | 0.37 |

## CIF S3

|    |    |     |       |      |
|----|----|-----|-------|------|
| -7 | 8  | 11  | 0.11  | 0.40 |
| -7 | 8  | 11  | 0.94  | 0.32 |
| -7 | 8  | 11  | 0.16  | 0.24 |
| -7 | -8 | -11 | 0.09  | 0.26 |
| -7 | -8 | -11 | 0.41  | 0.43 |
| -7 | -8 | -11 | 0.61  | 0.42 |
| 7  | 8  | 11  | 0.54  | 0.33 |
| 0  | 9  | 11  | 11.83 | 1.38 |
| 0  | -9 | 11  | 13.64 | 1.44 |
| 0  | -9 | 11  | 11.83 | 1.19 |
| 0  | -9 | 11  | 11.38 | 1.25 |
| 0  | -9 | 11  | 13.38 | 1.07 |
| 0  | -9 | 11  | 12.88 | 0.99 |
| 0  | -9 | 11  | 12.69 | 1.36 |
| 0  | 9  | 11  | 10.75 | 1.07 |
| 0  | -9 | 11  | 13.14 | 1.14 |
| 0  | -9 | 11  | 11.62 | 1.11 |
| 0  | -9 | 11  | 9.86  | 1.25 |
| 0  | -9 | 11  | 10.99 | 1.10 |
| 0  | 9  | 11  | 12.00 | 1.09 |
| 1  | -9 | 11  | 5.77  | 1.07 |
| 1  | -9 | 11  | 5.11  | 0.93 |
| 1  | -9 | 11  | 5.64  | 1.16 |
| 1  | -9 | 11  | 6.57  | 1.21 |
| 1  | -9 | 11  | 4.35  | 0.95 |
| 1  | -9 | 11  | 4.30  | 0.89 |
| 1  | -9 | 11  | 3.78  | 0.97 |
| 1  | -9 | 11  | 4.83  | 1.33 |
| -1 | 9  | 11  | 5.48  | 1.04 |
| -1 | 9  | 11  | 5.43  | 1.02 |
| -1 | 9  | 11  | 4.63  | 0.94 |
| -1 | 9  | 11  | 4.52  | 1.19 |
| -1 | -9 | -11 | 4.62  | 1.20 |
| -1 | -9 | 11  | 5.54  | 0.95 |
| -1 | -9 | 11  | 4.94  | 0.99 |
| -1 | -9 | 11  | 6.66  | 1.15 |
| -1 | -9 | 11  | 5.30  | 0.91 |
| -1 | -9 | 11  | 2.42  | 0.65 |
| -1 | -9 | 11  | 5.42  | 0.95 |
| -1 | -9 | 11  | 5.41  | 0.88 |
| 1  | 9  | 11  | 3.50  | 0.80 |

## CIF S3

|    |    |     |       |      |
|----|----|-----|-------|------|
| 1  | 9  | 11  | 5.62  | 0.99 |
| -1 | -9 | 11  | 5.33  | 1.16 |
| -1 | -9 | 11  | 4.96  | 1.00 |
| -2 | 9  | 11  | 0.18  | 0.68 |
| 2  | -9 | 11  | 0.23  | 0.92 |
| -2 | 9  | 11  | 1.62  | 0.62 |
| 2  | -9 | 11  | 0.06  | 0.82 |
| -2 | -9 | -11 | 0.46  | 0.60 |
| -2 | 9  | 11  | 0.34  | 0.73 |
| 2  | -9 | 11  | 0.21  | 0.46 |
| -2 | 9  | 11  | -0.20 | 0.36 |
| 2  | -9 | 11  | 0.89  | 0.74 |
| -2 | 9  | 11  | 1.33  | 0.83 |
| 2  | -9 | 11  | 0.57  | 0.77 |
| 2  | -9 | 11  | 0.18  | 0.94 |
| 2  | -9 | 11  | 0.82  | 0.83 |
| -2 | -9 | 11  | -0.06 | 0.57 |
| -2 | -9 | 11  | 1.23  | 0.68 |
| -2 | -9 | 11  | 0.73  | 0.85 |
| -2 | -9 | 11  | -0.15 | 0.52 |
| -2 | -9 | 11  | -0.18 | 0.50 |
| 2  | 9  | 11  | 0.70  | 0.54 |
| -2 | -9 | 11  | 1.17  | 0.71 |
| 3  | -9 | 11  | 2.29  | 1.00 |
| 3  | -9 | 11  | 1.81  | 0.79 |
| -3 | 9  | 11  | 2.72  | 0.78 |
| 3  | -9 | 11  | 4.67  | 0.98 |
| 3  | -9 | 11  | 2.67  | 0.81 |
| -3 | 9  | 11  | 2.45  | 0.68 |
| -3 | -9 | -11 | 2.30  | 0.96 |
| -3 | 9  | 11  | 0.88  | 0.64 |
| 3  | -9 | 11  | 1.81  | 0.75 |
| -3 | 9  | 11  | 2.33  | 0.84 |
| -3 | 9  | 11  | 1.50  | 0.70 |
| -3 | -9 | 11  | 2.24  | 0.63 |
| -3 | -9 | 11  | 2.90  | 0.72 |
| 3  | 9  | 11  | 2.72  | 0.59 |
| -3 | -9 | 11  | 2.99  | 0.65 |
| -3 | -9 | 11  | 1.77  | 0.48 |
| -4 | -9 | -11 | 0.58  | 0.75 |
| -4 | 9  | 11  | 0.31  | 0.61 |

## CIF S3

|    |    |     |       |      |
|----|----|-----|-------|------|
| -4 | -9 | -11 | 0.44  | 0.42 |
| -4 | -9 | -11 | 0.47  | 0.37 |
| -4 | -9 | -11 | 0.47  | 0.91 |
| 4  | -9 | 11  | 1.08  | 0.98 |
| 4  | -9 | 11  | 0.38  | 0.67 |
| -4 | 9  | 11  | 0.17  | 0.57 |
| -4 | -9 | -11 | 0.11  | 0.95 |
| -4 | 9  | 11  | 0.62  | 0.77 |
| -4 | 9  | 11  | 0.63  | 0.60 |
| -4 | 9  | 11  | 0.14  | 0.59 |
| 4  | -9 | 11  | 0.86  | 0.81 |
| -4 | 9  | 11  | -0.18 | 0.62 |
| -4 | -9 | 11  | 0.50  | 0.30 |
| -4 | -9 | 11  | 0.23  | 0.38 |
| -4 | 9  | -11 | 1.15  | 0.77 |
| 4  | 9  | 11  | 0.55  | 0.50 |
| -4 | -9 | 11  | 0.37  | 0.51 |
| -5 | 9  | 11  | 9.71  | 1.40 |
| -5 | -9 | -11 | 12.52 | 1.21 |
| -5 | -9 | -11 | 13.73 | 1.07 |
| -5 | 9  | 11  | 11.37 | 0.92 |
| -5 | 9  | 11  | 11.36 | 1.13 |
| -5 | 9  | 11  | 14.87 | 1.09 |
| -5 | 9  | 11  | 12.66 | 0.97 |
| -5 | 9  | 11  | 13.02 | 0.98 |
| -5 | 9  | 11  | 13.22 | 1.09 |
| -5 | -9 | -11 | 12.38 | 1.16 |
| -5 | -9 | -11 | 10.65 | 1.11 |
| -5 | -9 | 11  | 14.39 | 0.75 |
| -5 | 9  | -11 | 13.61 | 1.22 |
| -5 | -9 | 11  | 13.89 | 0.77 |
| -5 | -9 | 11  | 12.86 | 0.90 |
| 5  | 9  | 11  | 13.74 | 0.98 |
| -6 | -9 | -11 | 4.47  | 0.86 |
| -6 | 9  | 11  | 3.78  | 0.60 |
| -6 | 9  | 11  | 1.91  | 0.47 |
| -6 | 9  | 11  | 2.44  | 0.72 |
| -6 | -9 | -11 | 2.30  | 0.56 |
| -6 | 9  | -11 | 2.86  | 0.62 |
| 6  | 9  | 11  | 3.75  | 0.63 |
| -7 | -9 | -11 | 0.33  | 0.42 |



## CIF S3

|    |     |     |      |      |
|----|-----|-----|------|------|
| -7 | -9  | -11 | 0.30 | 0.34 |
| -7 | 9   | 11  | 0.26 | 0.16 |
| -7 | 9   | 11  | 0.21 | 0.24 |
| 7  | 9   | 11  | 0.69 | 0.38 |
| 0  | 10  | 11  | 8.69 | 1.08 |
| 0  | -10 | 11  | 9.89 | 1.28 |
| 0  | -10 | 11  | 9.89 | 0.99 |
| 0  | -10 | 11  | 8.26 | 1.00 |
| 0  | -10 | 11  | 8.16 | 0.97 |
| 0  | -10 | 11  | 8.40 | 1.04 |
| 0  | -10 | -11 | 8.94 | 1.28 |
| 0  | -10 | 11  | 8.32 | 1.28 |
| 0  | -10 | -11 | 6.00 | 1.72 |
| 0  | 10  | 11  | 8.29 | 1.61 |
| 0  | -10 | 11  | 9.69 | 0.86 |
| 0  | -10 | 11  | 9.47 | 1.13 |
| 0  | -10 | 11  | 9.85 | 1.06 |
| 1  | -10 | 11  | 0.14 | 0.51 |
| 1  | -10 | 11  | 1.22 | 0.77 |
| -1 | 10  | 11  | 0.49 | 0.86 |
| 1  | -10 | 11  | 0.45 | 0.74 |
| 1  | -10 | 11  | 0.59 | 0.72 |
| 1  | -10 | 11  | 1.95 | 1.03 |
| -1 | -10 | -11 | 0.63 | 0.84 |
| -1 | -10 | -11 | 0.63 | 0.63 |
| 1  | -10 | 11  | 1.27 | 0.67 |
| -1 | 10  | 11  | 1.19 | 0.64 |
| 1  | -10 | 11  | 0.67 | 0.85 |
| -1 | 10  | 11  | 0.87 | 0.72 |
| -1 | 10  | 11  | 1.42 | 0.47 |
| 1  | -10 | 11  | 3.47 | 0.85 |
| -1 | -10 | 11  | 1.43 | 0.76 |
| -1 | -10 | 11  | 1.15 | 0.98 |
| -1 | -10 | 11  | 1.36 | 0.80 |
| -1 | -10 | 11  | 1.77 | 0.58 |
| -1 | -10 | 11  | 0.33 | 0.66 |
| 1  | 10  | 11  | 1.38 | 0.60 |
| -1 | -10 | 11  | 1.22 | 0.60 |
| 1  | -10 | -11 | 1.48 | 0.74 |
| -1 | -10 | 11  | 1.68 | 0.65 |
| -1 | -10 | 11  | 1.22 | 0.57 |

## CIF S3

|    |     |     |       |      |
|----|-----|-----|-------|------|
| -1 | -10 | 11  | 1.39  | 0.58 |
| 2  | -10 | 11  | 11.22 | 1.15 |
| 2  | -10 | 11  | 10.65 | 1.48 |
| -2 | 10  | 11  | 9.80  | 1.09 |
| 2  | -10 | 11  | 9.54  | 1.09 |
| -2 | 10  | 11  | 11.01 | 1.28 |
| 2  | -10 | 11  | 10.16 | 1.09 |
| 2  | -10 | 11  | 12.02 | 1.30 |
| -2 | 10  | 11  | 11.10 | 0.74 |
| -2 | 10  | 11  | 11.74 | 1.23 |
| 2  | -10 | 11  | 9.87  | 1.20 |
| -2 | 10  | 11  | 9.86  | 1.04 |
| 2  | -10 | 11  | 12.53 | 1.58 |
| -2 | -10 | -11 | 9.33  | 1.38 |
| 2  | -10 | 11  | 10.27 | 1.27 |
| 2  | 10  | 11  | 10.86 | 0.98 |
| 2  | -10 | -11 | 11.81 | 1.35 |
| -2 | -10 | 11  | 8.19  | 1.24 |
| -2 | -10 | 11  | 9.24  | 1.18 |
| -2 | -10 | 11  | 11.69 | 0.98 |
| -2 | -10 | 11  | 11.46 | 0.95 |
| -2 | -10 | 11  | 9.80  | 0.96 |
| -2 | -10 | 11  | 10.37 | 1.01 |
| -3 | 10  | 11  | 3.53  | 0.87 |
| -3 | -10 | -11 | 2.11  | 0.55 |
| 3  | -10 | 11  | 2.85  | 0.74 |
| 3  | -10 | 11  | 3.88  | 0.98 |
| -3 | 10  | 11  | 2.98  | 0.71 |
| 3  | -10 | 11  | 1.33  | 0.73 |
| -3 | 10  | 11  | 4.96  | 1.09 |
| 3  | -10 | 11  | 3.55  | 0.98 |
| 3  | -10 | 11  | 4.25  | 0.99 |
| 3  | -10 | 11  | 2.16  | 0.90 |
| -3 | 10  | 11  | 3.45  | 0.99 |
| -3 | -10 | 11  | 3.41  | 0.57 |
| 3  | 10  | 11  | 3.71  | 0.79 |
| -3 | -10 | 11  | 3.72  | 0.70 |
| -3 | -10 | 11  | 4.59  | 0.73 |
| -4 | 10  | 11  | 0.02  | 0.75 |
| -4 | 10  | 11  | 0.20  | 0.59 |
| -4 | -10 | -11 | 0.38  | 0.66 |

## CIF S3

|    |     |     |       |      |
|----|-----|-----|-------|------|
| -4 | 10  | 11  | 0.69  | 0.55 |
| -4 | -10 | -11 | 0.32  | 0.33 |
| -4 | 10  | 11  | 0.11  | 0.55 |
| -4 | -10 | -11 | 1.01  | 0.73 |
| 4  | -10 | 11  | 1.14  | 0.65 |
| -4 | 10  | 11  | -0.08 | 0.54 |
| 4  | -10 | 11  | 0.04  | 0.67 |
| -4 | 10  | 11  | 0.99  | 0.58 |
| 4  | -10 | -11 | 0.72  | 0.83 |
| -4 | -10 | 11  | 0.75  | 0.43 |
| 4  | 10  | 11  | 1.03  | 0.49 |
| -4 | -10 | 11  | 0.58  | 0.34 |
| -4 | 10  | -11 | 1.24  | 0.84 |
| -5 | 10  | 11  | 2.38  | 0.68 |
| 5  | 10  | 11  | 2.46  | 0.65 |
| 0  | -11 | 11  | 3.49  | 0.84 |
| 0  | -11 | 11  | 3.49  | 0.90 |
| 0  | 11  | 11  | 4.69  | 0.91 |
| 0  | -11 | 11  | 4.93  | 1.16 |
| 0  | -11 | 11  | 7.28  | 1.29 |
| 0  | -11 | 11  | 4.53  | 0.83 |
| 0  | -11 | 11  | 3.85  | 0.77 |
| 0  | -11 | -11 | 5.94  | 0.95 |
| 0  | -11 | 11  | 5.00  | 0.96 |
| 0  | -11 | 11  | 3.70  | 0.67 |
| 0  | -11 | -11 | 1.59  | 0.84 |
| -1 | 11  | 11  | 7.95  | 0.95 |
| 1  | -11 | 11  | 7.61  | 1.44 |
| 1  | -11 | 11  | 7.76  | 0.85 |
| 1  | -11 | 11  | 6.80  | 1.00 |
| -1 | -11 | -11 | 7.52  | 1.13 |
| -1 | 11  | 11  | 5.95  | 1.19 |
| 1  | -11 | 11  | 6.88  | 0.93 |
| 1  | -11 | 11  | 6.94  | 1.16 |
| -1 | 11  | 11  | 7.53  | 0.69 |
| 1  | -11 | 11  | 6.68  | 0.98 |
| 1  | -11 | 11  | 8.01  | 0.95 |
| -1 | -11 | 11  | 8.34  | 0.89 |
| -1 | -11 | 11  | 6.98  | 0.97 |
| 1  | 11  | 11  | 7.61  | 0.99 |
| -1 | -11 | 11  | 7.46  | 0.80 |

## CIF S3

|    |     |     |       |      |
|----|-----|-----|-------|------|
| -1 | -11 | 11  | 7.67  | 1.15 |
| -1 | -11 | 11  | 9.06  | 0.86 |
| -1 | -11 | 11  | 5.40  | 0.88 |
| 1  | -11 | -11 | 9.21  | 1.05 |
| -2 | -11 | -11 | 4.09  | 0.96 |
| 2  | -11 | 11  | 3.48  | 0.87 |
| 2  | -11 | 11  | 2.13  | 0.69 |
| 2  | -11 | 11  | 4.21  | 1.12 |
| 2  | -11 | 11  | 3.99  | 0.84 |
| 2  | -11 | 11  | 5.65  | 0.92 |
| -2 | 11  | 11  | 4.12  | 0.90 |
| -2 | 11  | 11  | 4.20  | 0.87 |
| 2  | -11 | 11  | 2.48  | 0.66 |
| 2  | -11 | 11  | 5.04  | 1.06 |
| -2 | 11  | 11  | 4.20  | 0.86 |
| -2 | 11  | 11  | 4.60  | 0.96 |
| -2 | -11 | 11  | 4.54  | 0.76 |
| 2  | -11 | -11 | 7.08  | 1.04 |
| -2 | -11 | 11  | 3.88  | 0.77 |
| 2  | -11 | -11 | 5.10  | 1.23 |
| -2 | -11 | 11  | 5.27  | 1.00 |
| 2  | 11  | 11  | 4.57  | 0.83 |
| 3  | -11 | 11  | 8.87  | 1.01 |
| 3  | -11 | 11  | 6.61  | 0.96 |
| 3  | -11 | 11  | 8.45  | 1.05 |
| -3 | 11  | 11  | 9.98  | 1.00 |
| -3 | 11  | 11  | 6.78  | 0.93 |
| -3 | 11  | 11  | 9.20  | 1.20 |
| -3 | -11 | -11 | 7.61  | 0.77 |
| 3  | -11 | 11  | 8.28  | 1.07 |
| -3 | -11 | 11  | 8.68  | 1.07 |
| 3  | -11 | -11 | 12.99 | 1.20 |
| -3 | -11 | 11  | 8.38  | 0.74 |
| 3  | 11  | 11  | 9.46  | 0.84 |
| -3 | -11 | 11  | 8.63  | 0.78 |
| -4 | 11  | 11  | 0.91  | 0.53 |
| 4  | -11 | 11  | 1.13  | 0.58 |
| -4 | -11 | -11 | 0.38  | 0.62 |
| -4 | 11  | 11  | 1.63  | 0.53 |
| -4 | 11  | 11  | 0.36  | 0.47 |
| -4 | -11 | -11 | 0.03  | 0.45 |

## CIF S3

|    |     |     |       |      |
|----|-----|-----|-------|------|
| -4 | 11  | 11  | 1.31  | 0.67 |
| -4 | 11  | 11  | 0.82  | 0.49 |
| -4 | -11 | 11  | 1.02  | 0.31 |
| 4  | 11  | 11  | 0.54  | 0.40 |
| 4  | -11 | -11 | 2.80  | 1.00 |
| -5 | 11  | 11  | 0.92  | 0.39 |
| -5 | 11  | 11  | 1.48  | 0.34 |
| -5 | 11  | 11  | 0.80  | 0.36 |
| -5 | 11  | 11  | 1.63  | 0.36 |
| -5 | -11 | -11 | 0.55  | 0.48 |
| -5 | 11  | 11  | 2.33  | 0.63 |
| 5  | 11  | 11  | 2.21  | 0.50 |
| 5  | -11 | -11 | 2.42  | 0.76 |
| -5 | 11  | -11 | 1.80  | 0.44 |
| 0  | -12 | 11  | 9.42  | 0.85 |
| 0  | -12 | 11  | 11.63 | 1.13 |
| 0  | -12 | 11  | 11.49 | 1.02 |
| 0  | -12 | 11  | 9.21  | 0.87 |
| 0  | -12 | -11 | 8.33  | 1.03 |
| 0  | 12  | 11  | 10.60 | 0.94 |
| 0  | -12 | 11  | 11.18 | 1.40 |
| 0  | 12  | 11  | 9.68  | 0.74 |
| 0  | -12 | 11  | 9.39  | 0.94 |
| 1  | -12 | 11  | 1.72  | 0.54 |
| 1  | -12 | 11  | 2.77  | 0.83 |
| -1 | 12  | 11  | 2.47  | 0.45 |
| -1 | -12 | -11 | 1.21  | 0.70 |
| 1  | -12 | 11  | 2.87  | 0.89 |
| 1  | -12 | 11  | 2.54  | 0.99 |
| 1  | -12 | 11  | 1.46  | 0.52 |
| -1 | 12  | 11  | 2.69  | 0.55 |
| 1  | -12 | 11  | 2.04  | 0.53 |
| -1 | 12  | 11  | 1.70  | 0.73 |
| -1 | -12 | 11  | 1.58  | 0.50 |
| -1 | -12 | 11  | 2.54  | 0.87 |
| -1 | -12 | 11  | 2.27  | 0.49 |
| 1  | -12 | -11 | 1.51  | 0.55 |
| 1  | 12  | 11  | 3.46  | 0.71 |
| 1  | -12 | -11 | 1.37  | 0.68 |
| -1 | -12 | 11  | 1.97  | 0.45 |
| -2 | 12  | 11  | 3.66  | 0.81 |

## CIF S3

|    |     |     |      |      |
|----|-----|-----|------|------|
| 2  | -12 | 11  | 3.46 | 0.75 |
| -2 | 12  | 11  | 4.79 | 1.07 |
| -2 | -12 | -11 | 4.55 | 0.71 |
| 2  | -12 | 11  | 5.07 | 0.95 |
| -2 | 12  | 11  | 4.80 | 0.79 |
| 2  | -12 | 11  | 4.26 | 0.74 |
| 2  | -12 | 11  | 4.41 | 0.64 |
| 2  | -12 | -11 | 1.27 | 0.77 |
| -2 | -12 | 11  | 3.81 | 0.70 |
| 2  | -12 | -11 | 3.64 | 0.83 |
| -2 | -12 | 11  | 5.08 | 0.69 |
| 2  | 12  | 11  | 3.96 | 0.77 |
| -2 | -12 | 11  | 4.75 | 0.57 |
| 3  | -12 | 11  | 3.64 | 0.97 |
| -3 | 12  | 11  | 3.69 | 0.72 |
| 3  | -12 | 11  | 3.97 | 0.68 |
| -3 | 12  | 11  | 4.29 | 0.67 |
| 3  | -12 | 11  | 3.84 | 0.72 |
| -3 | 12  | 11  | 3.99 | 0.87 |
| -3 | -12 | 11  | 4.60 | 0.56 |
| -3 | -12 | 11  | 4.30 | 0.48 |
| 3  | -12 | -11 | 3.26 | 0.83 |
| -3 | -12 | 11  | 3.64 | 0.56 |
| 3  | 12  | 11  | 3.00 | 0.68 |
| -4 | 12  | 11  | 2.17 | 0.52 |
| -4 | 12  | 11  | 2.19 | 0.59 |
| 4  | -12 | 11  | 2.54 | 0.59 |
| -4 | 12  | 11  | 2.22 | 0.47 |
| -4 | -12 | -11 | 0.53 | 0.47 |
| -4 | 12  | 11  | 2.47 | 0.53 |
| -4 | 12  | 11  | 1.56 | 0.40 |
| 4  | 12  | 11  | 2.58 | 0.62 |
| 4  | -12 | -11 | 2.61 | 0.61 |
| -4 | -12 | 11  | 2.19 | 0.34 |
| -4 | -12 | 11  | 3.06 | 0.33 |
| 0  | 13  | 11  | 4.93 | 0.46 |
| 0  | -13 | 11  | 3.88 | 0.66 |
| 0  | 13  | 11  | 4.95 | 0.66 |
| 0  | -13 | 11  | 4.62 | 0.87 |
| 0  | -13 | 11  | 4.99 | 0.60 |
| 0  | -13 | -11 | 4.54 | 0.90 |

## CIF S3

|    |     |     |       |      |
|----|-----|-----|-------|------|
| 0  | -13 | 11  | 4.53  | 0.83 |
| 0  | -13 | 11  | 4.30  | 0.59 |
| 1  | -13 | 11  | 4.33  | 0.67 |
| -1 | 13  | 11  | 3.65  | 0.85 |
| 1  | -13 | 11  | 3.13  | 0.59 |
| 1  | -13 | 11  | 4.85  | 0.88 |
| 1  | -13 | 11  | 3.52  | 0.56 |
| 1  | -13 | 11  | 2.78  | 0.81 |
| -1 | 13  | 11  | 3.42  | 0.62 |
| 1  | 13  | 11  | 3.49  | 0.47 |
| -1 | -13 | 11  | 3.38  | 0.60 |
| -1 | -13 | 11  | 3.63  | 0.96 |
| -1 | -13 | 11  | 3.69  | 0.71 |
| -1 | -13 | 11  | 2.57  | 0.55 |
| 1  | 13  | 11  | 3.02  | 0.58 |
| 2  | -13 | 11  | 9.66  | 0.75 |
| -2 | 13  | 11  | 11.64 | 0.90 |
| -2 | 13  | 11  | 9.72  | 0.99 |
| 2  | -13 | 11  | 10.31 | 0.75 |
| -2 | 13  | 11  | 10.99 | 0.75 |
| 2  | -13 | 11  | 8.92  | 0.92 |
| -2 | -13 | 11  | 12.12 | 0.73 |
| -2 | -13 | 11  | 11.08 | 0.67 |
| 2  | 13  | 11  | 9.73  | 0.75 |
| 0  | 0   | -12 | 46.34 | 3.00 |
| 0  | 0   | -12 | 48.20 | 2.87 |
| 0  | 0   | 12  | 54.49 | 2.66 |
| 0  | 0   | 12  | 54.06 | 2.74 |
| -1 | 0   | 12  | 0.52  | 0.50 |
| 1  | 0   | 12  | 0.40  | 0.47 |
| -1 | 0   | -12 | 0.14  | 0.76 |
| -1 | 0   | 12  | 0.50  | 0.45 |
| 1  | 0   | -12 | 0.19  | 0.64 |
| 1  | 0   | -12 | 0.97  | 0.85 |
| -1 | 0   | -12 | 1.16  | 0.91 |
| 2  | 0   | -12 | 3.56  | 0.98 |
| 2  | 0   | 12  | 2.80  | 0.62 |
| -2 | 0   | 12  | 2.46  | 0.65 |
| -2 | 0   | 12  | 3.15  | 0.65 |
| 2  | 0   | -12 | 2.76  | 0.80 |
| -3 | 0   | 12  | 4.31  | 0.71 |

## CIF S3

|    |   |     |       |      |
|----|---|-----|-------|------|
| -3 | 0 | 12  | 4.02  | 0.75 |
| -3 | 0 | 12  | 4.86  | 0.59 |
| -3 | 0 | -12 | 4.58  | 1.12 |
| 3  | 0 | 12  | 4.47  | 0.72 |
| 3  | 0 | -12 | 4.05  | 1.04 |
| 3  | 0 | -12 | 4.67  | 0.92 |
| -3 | 0 | -12 | 6.03  | 1.10 |
| -4 | 0 | 12  | 12.96 | 0.84 |
| 4  | 0 | 12  | 11.43 | 1.02 |
| 4  | 0 | -12 | 11.17 | 1.29 |
| -4 | 0 | 12  | 11.85 | 0.91 |
| -4 | 0 | -12 | 11.11 | 1.38 |
| -4 | 0 | -12 | 13.10 | 1.37 |
| -4 | 0 | 12  | 12.39 | 1.11 |
| -5 | 0 | 12  | 3.48  | 0.90 |
| -5 | 0 | -12 | 2.44  | 0.87 |
| 5  | 0 | 12  | 2.19  | 0.63 |
| -5 | 0 | 12  | 3.01  | 0.51 |
| -5 | 0 | 12  | 2.56  | 0.55 |
| 6  | 0 | 12  | 5.33  | 0.84 |
| -6 | 0 | -12 | 4.39  | 0.89 |
| -6 | 0 | 12  | 3.50  | 0.60 |
| -6 | 0 | -12 | 7.68  | 1.59 |
| -6 | 0 | 12  | 5.12  | 0.43 |
| -6 | 0 | 12  | 4.09  | 0.44 |
| -6 | 0 | 12  | 3.96  | 0.43 |
| -6 | 0 | -12 | 6.50  | 1.16 |
| -6 | 0 | 12  | 4.55  | 1.14 |
| -6 | 0 | -12 | 5.42  | 1.22 |
| 7  | 0 | 12  | -0.03 | 0.42 |
| -7 | 0 | -12 | -0.21 | 0.88 |
| -7 | 0 | -12 | 0.24  | 0.58 |
| -7 | 0 | -12 | -0.17 | 0.52 |
| -7 | 0 | -12 | 0.73  | 1.03 |
| -8 | 0 | -12 | 3.02  | 0.72 |
| -8 | 0 | -12 | 3.27  | 0.69 |
| -8 | 0 | -12 | 1.86  | 0.71 |
| 8  | 0 | 12  | 2.32  | 0.63 |
| -8 | 0 | -12 | 4.28  | 1.20 |
| -9 | 0 | -12 | 1.74  | 0.80 |
| -9 | 0 | -12 | 0.24  | 0.46 |



## CIF S3

|    |    |     |       |      |
|----|----|-----|-------|------|
| -9 | 0  | -12 | 0.64  | 0.30 |
| -9 | 0  | -12 | 0.74  | 0.31 |
| -9 | 0  | -12 | 1.47  | 0.33 |
| 9  | 0  | 12  | 1.60  | 0.41 |
| 0  | 1  | -12 | 0.64  | 0.75 |
| 0  | -1 | -12 | 0.22  | 0.74 |
| 0  | 1  | -12 | 0.11  | 0.79 |
| 0  | -1 | -12 | 0.20  | 0.93 |
| 0  | 1  | 12  | 0.61  | 0.54 |
| 0  | 1  | 12  | 0.28  | 0.38 |
| 0  | -1 | 12  | 0.31  | 0.40 |
| 0  | -1 | 12  | 0.59  | 0.54 |
| 1  | 1  | -12 | 20.81 | 1.49 |
| -1 | -1 | -12 | 20.79 | 1.53 |
| 1  | 1  | -12 | 19.55 | 1.58 |
| 1  | -1 | 12  | 22.12 | 1.30 |
| -1 | 1  | 12  | 18.76 | 1.29 |
| 1  | -1 | -12 | 20.16 | 1.55 |
| 1  | 1  | 12  | 20.37 | 1.27 |
| -1 | -1 | 12  | 21.97 | 1.34 |
| -1 | 1  | -12 | 21.03 | 1.72 |
| 1  | -1 | -12 | 20.95 | 1.71 |
| -1 | 1  | -12 | 21.86 | 1.59 |
| -1 | -1 | 12  | 18.47 | 1.24 |
| 2  | 1  | -12 | 8.37  | 1.06 |
| 2  | 1  | -12 | 8.50  | 0.96 |
| -2 | 1  | 12  | 7.66  | 0.83 |
| 2  | -1 | 12  | 9.04  | 0.84 |
| -2 | 1  | 12  | 8.03  | 0.84 |
| 2  | -1 | -12 | 6.11  | 1.14 |
| 2  | -1 | -12 | 7.39  | 1.05 |
| 2  | 1  | 12  | 7.78  | 0.77 |
| -2 | -1 | 12  | 6.54  | 0.76 |
| -2 | -1 | 12  | 6.69  | 0.78 |
| -3 | 1  | 12  | 3.07  | 0.70 |
| 3  | -1 | 12  | 2.58  | 0.58 |
| -3 | -1 | -12 | 2.33  | 0.90 |
| 3  | 1  | -12 | 3.60  | 0.94 |
| -3 | 1  | 12  | 2.50  | 0.55 |
| -3 | 1  | 12  | 2.78  | 0.56 |
| 3  | 1  | -12 | 2.20  | 0.71 |

## CIF S3

|    |    |     |       |      |
|----|----|-----|-------|------|
| 3  | -1 | -12 | 1.51  | 0.89 |
| 3  | -1 | -12 | 2.41  | 1.01 |
| -3 | -1 | 12  | 2.74  | 0.66 |
| -3 | 1  | -12 | 2.73  | 0.87 |
| -3 | -1 | 12  | 3.15  | 0.74 |
| -3 | -1 | 12  | 2.65  | 0.52 |
| -3 | 1  | -12 | 4.11  | 1.19 |
| -3 | -1 | 12  | 2.12  | 0.32 |
| -3 | -1 | 12  | 3.08  | 0.39 |
| 3  | 1  | 12  | 1.77  | 0.56 |
| -4 | -1 | -12 | 4.28  | 1.01 |
| 4  | -1 | 12  | 3.23  | 0.77 |
| -4 | 1  | 12  | 1.82  | 0.52 |
| -4 | 1  | 12  | 2.59  | 0.55 |
| -4 | 1  | 12  | 3.75  | 1.00 |
| 4  | 1  | -12 | 2.03  | 0.86 |
| -4 | -1 | 12  | 2.45  | 0.52 |
| -4 | -1 | 12  | 2.91  | 0.51 |
| -4 | 1  | -12 | 3.16  | 1.10 |
| 4  | -1 | -12 | 3.05  | 1.00 |
| -4 | 1  | -12 | 4.12  | 0.96 |
| 4  | -1 | -12 | 1.42  | 0.84 |
| -4 | -1 | 12  | 2.11  | 0.74 |
| 4  | 1  | 12  | 2.64  | 0.71 |
| -5 | 1  | 12  | 27.02 | 1.54 |
| -5 | -1 | -12 | 27.41 | 1.94 |
| -5 | 1  | 12  | 28.97 | 1.58 |
| -5 | 1  | 12  | 29.36 | 1.78 |
| 5  | -1 | 12  | 27.25 | 1.78 |
| -5 | 1  | -12 | 32.18 | 1.98 |
| -5 | 1  | -12 | 20.75 | 2.18 |
| -5 | -1 | 12  | 28.55 | 1.51 |
| 5  | 1  | 12  | 26.49 | 1.83 |
| -5 | -1 | 12  | 30.21 | 1.87 |
| -6 | -1 | -12 | 9.35  | 1.68 |
| 6  | -1 | 12  | 11.35 | 0.98 |
| -6 | 1  | 12  | 10.28 | 0.68 |
| -6 | -1 | -12 | 12.78 | 1.27 |
| -6 | 1  | 12  | 10.32 | 0.69 |
| -6 | -1 | -12 | 8.41  | 1.44 |
| -6 | -1 | -12 | 13.31 | 1.81 |

## CIF S3

|    |    |     |       |      |
|----|----|-----|-------|------|
| -6 | -1 | -12 | 10.98 | 1.08 |
| -6 | 1  | -12 | 8.40  | 1.45 |
| -6 | -1 | 12  | 10.74 | 0.58 |
| -6 | 1  | -12 | 9.93  | 1.36 |
| -6 | -1 | 12  | 12.20 | 1.23 |
| -6 | -1 | 12  | 10.82 | 0.62 |
| -6 | 1  | -12 | 9.76  | 0.97 |
| 6  | 1  | 12  | 10.84 | 0.99 |
| -6 | 1  | -12 | 11.76 | 1.54 |
| -6 | -1 | 12  | 11.06 | 0.61 |
| -7 | -1 | -12 | 2.19  | 1.12 |
| -7 | -1 | -12 | 1.52  | 0.57 |
| -7 | 1  | 12  | 1.57  | 0.17 |
| -7 | 1  | 12  | 1.96  | 0.19 |
| 7  | -1 | 12  | 2.36  | 0.74 |
| -7 | -1 | -12 | 1.60  | 0.59 |
| -7 | -1 | -12 | 1.11  | 0.86 |
| -7 | 1  | -12 | 2.48  | 0.91 |
| -7 | 1  | -12 | 1.32  | 0.50 |
| -7 | 1  | -12 | 2.27  | 0.61 |
| -7 | 1  | -12 | 1.77  | 1.06 |
| 7  | 1  | 12  | 1.75  | 0.46 |
| -7 | 1  | -12 | 2.31  | 0.56 |
| -8 | -1 | -12 | 1.36  | 0.73 |
| -8 | -1 | -12 | 1.57  | 0.47 |
| -8 | -1 | -12 | 0.94  | 0.45 |
| -8 | -1 | -12 | 1.63  | 0.48 |
| -8 | -1 | -12 | 1.61  | 0.81 |
| 8  | -1 | 12  | 1.14  | 0.36 |
| -8 | 1  | -12 | 0.87  | 0.47 |
| -8 | 1  | -12 | 1.49  | 0.49 |
| -8 | 1  | -12 | 0.84  | 0.86 |
| -8 | 1  | -12 | 0.21  | 0.71 |
| 8  | 1  | 12  | 1.06  | 0.39 |
| -9 | -1 | -12 | 0.89  | 0.43 |
| 9  | -1 | 12  | 1.18  | 0.34 |
| -9 | -1 | -12 | 0.77  | 0.30 |
| -9 | -1 | -12 | 0.57  | 0.29 |
| -9 | -1 | -12 | 0.53  | 0.51 |
| -9 | -1 | -12 | 1.24  | 0.27 |
| 9  | 1  | 12  | 0.98  | 0.25 |

## CIF S3

|    |    |     |       |      |
|----|----|-----|-------|------|
| -9 | 1  | -12 | 0.74  | 0.30 |
| -9 | 1  | -12 | 1.31  | 0.32 |
| -9 | 1  | -12 | 0.07  | 0.47 |
| -9 | 1  | -12 | 1.36  | 0.32 |
| 0  | 2  | 12  | 15.81 | 1.02 |
| 0  | -2 | -12 | 13.60 | 1.34 |
| 0  | 2  | -12 | 17.27 | 1.47 |
| 0  | 2  | -12 | 14.45 | 1.25 |
| 0  | -2 | 12  | 15.14 | 1.01 |
| 0  | -2 | 12  | 14.43 | 1.11 |
| 0  | -2 | -12 | 15.45 | 1.51 |
| 0  | -2 | 12  | 17.06 | 1.02 |
| 1  | 2  | -12 | 21.69 | 1.51 |
| -1 | 2  | 12  | 19.67 | 1.36 |
| 1  | -2 | 12  | 21.72 | 1.27 |
| 1  | 2  | -12 | 19.71 | 1.61 |
| -1 | -2 | -12 | 22.54 | 1.71 |
| 1  | -2 | -12 | 19.05 | 1.77 |
| -1 | -2 | 12  | 23.10 | 1.33 |
| -1 | 2  | -12 | 19.91 | 1.68 |
| -1 | 2  | -12 | 21.47 | 1.63 |
| 1  | 2  | 12  | 21.90 | 1.32 |
| -1 | -2 | 12  | 19.53 | 1.29 |
| 1  | -2 | -12 | 21.00 | 1.62 |
| -2 | 2  | 12  | 6.02  | 0.78 |
| 2  | -2 | 12  | 4.35  | 0.76 |
| -2 | 2  | 12  | 4.80  | 0.64 |
| -2 | 2  | 12  | 5.50  | 0.80 |
| 2  | 2  | -12 | 4.85  | 0.86 |
| 2  | -2 | 12  | 5.34  | 0.71 |
| 2  | 2  | -12 | 5.40  | 1.02 |
| 2  | -2 | -12 | 5.16  | 1.25 |
| -2 | -2 | 12  | 6.04  | 0.58 |
| 2  | -2 | -12 | 5.71  | 1.11 |
| -2 | -2 | 12  | 4.84  | 0.68 |
| -2 | -2 | 12  | 5.53  | 0.73 |
| -2 | -2 | 12  | 4.40  | 0.73 |
| 2  | 2  | 12  | 4.97  | 0.68 |
| -2 | 2  | -12 | 3.86  | 1.18 |
| -2 | -2 | 12  | 4.21  | 0.72 |
| -3 | 2  | 12  | 23.98 | 1.38 |

## CIF S3

|    |    |     |       |      |
|----|----|-----|-------|------|
| 3  | 2  | -12 | 26.48 | 1.61 |
| -3 | -2 | -12 | 23.21 | 1.76 |
| -3 | 2  | 12  | 24.92 | 1.55 |
| 3  | -2 | 12  | 25.48 | 1.59 |
| 3  | 2  | -12 | 24.95 | 1.72 |
| -3 | 2  | 12  | 24.46 | 1.50 |
| -3 | 2  | -12 | 25.07 | 1.79 |
| -3 | -2 | 12  | 24.92 | 1.54 |
| -3 | -2 | 12  | 25.95 | 1.26 |
| -3 | -2 | 12  | 25.78 | 1.26 |
| 3  | -2 | -12 | 23.76 | 1.80 |
| -3 | 2  | -12 | 25.09 | 1.80 |
| -3 | -2 | 12  | 24.52 | 1.44 |
| 3  | 2  | 12  | 22.01 | 1.49 |
| -3 | -2 | 12  | 24.68 | 1.39 |
| 3  | -2 | -12 | 21.95 | 1.91 |
| 4  | 2  | -12 | 5.34  | 0.95 |
| -4 | 2  | 12  | 4.89  | 0.43 |
| -4 | 2  | 12  | 5.44  | 0.66 |
| 4  | -2 | 12  | 5.90  | 0.96 |
| -4 | -2 | -12 | 5.81  | 1.24 |
| -4 | 2  | 12  | 6.06  | 0.79 |
| -4 | 2  | 12  | 5.42  | 0.91 |
| -4 | -2 | 12  | 6.02  | 0.93 |
| -4 | -2 | 12  | 6.22  | 0.58 |
| -4 | 2  | -12 | 4.82  | 1.07 |
| 4  | 2  | 12  | 6.19  | 0.88 |
| 4  | -2 | -12 | 4.78  | 1.43 |
| -4 | 2  | -12 | 5.08  | 1.22 |
| -4 | -2 | 12  | 5.29  | 0.67 |
| 4  | -2 | -12 | 4.82  | 1.13 |
| 5  | -2 | 12  | 7.97  | 1.03 |
| -5 | -2 | -12 | 7.96  | 1.22 |
| -5 | -2 | -12 | 7.66  | 0.96 |
| -5 | 2  | 12  | 8.42  | 0.79 |
| -5 | 2  | 12  | 7.43  | 0.70 |
| -5 | 2  | 12  | 9.65  | 1.06 |
| -5 | -2 | 12  | 7.99  | 0.61 |
| -5 | 2  | -12 | 6.02  | 1.15 |
| -5 | -2 | 12  | 7.44  | 1.02 |
| 6  | -2 | 12  | 1.35  | 0.48 |

## CIF S3

|    |    |     |      |      |
|----|----|-----|------|------|
| -6 | -2 | -12 | 0.94 | 0.54 |
| -6 | 2  | 12  | 1.20 | 0.32 |
| -6 | -2 | -12 | 1.60 | 0.68 |
| -6 | -2 | -12 | 1.12 | 1.19 |
| -6 | -2 | -12 | 1.22 | 0.55 |
| 6  | 2  | 12  | 1.08 | 0.48 |
| -6 | -2 | 12  | 1.41 | 0.87 |
| -6 | 2  | -12 | 0.42 | 1.03 |
| -6 | 2  | -12 | 0.37 | 0.92 |
| -6 | 2  | -12 | 1.21 | 0.57 |
| -7 | 2  | 12  | 2.33 | 0.35 |
| -7 | 2  | 12  | 2.14 | 0.37 |
| -7 | -2 | -12 | 1.71 | 0.58 |
| -7 | -2 | -12 | 0.84 | 1.02 |
| -7 | 2  | 12  | 2.31 | 0.37 |
| 7  | -2 | 12  | 2.46 | 0.74 |
| -7 | -2 | -12 | 1.67 | 0.85 |
| -7 | -2 | -12 | 2.04 | 0.56 |
| -7 | 2  | -12 | 1.64 | 0.96 |
| 7  | 2  | 12  | 2.39 | 0.80 |
| -7 | 2  | -12 | 2.25 | 0.41 |
| -7 | 2  | -12 | 1.84 | 1.00 |
| -7 | 2  | -12 | 1.99 | 0.62 |
| -7 | 2  | -12 | 1.45 | 0.58 |
| -8 | -2 | -12 | 0.74 | 0.67 |
| -8 | -2 | -12 | 2.20 | 0.64 |
| 8  | -2 | 12  | 1.38 | 0.37 |
| -8 | -2 | -12 | 2.15 | 0.66 |
| -8 | -2 | -12 | 1.33 | 0.48 |
| -8 | -2 | -12 | 2.52 | 0.45 |
| -8 | -2 | -12 | 2.15 | 0.47 |
| -8 | -2 | -12 | 1.35 | 0.88 |
| -8 | 2  | -12 | 2.90 | 0.77 |
| -8 | 2  | -12 | 1.56 | 0.63 |
| 8  | 2  | 12  | 2.64 | 0.67 |
| -8 | 2  | -12 | 2.77 | 0.66 |
| -9 | -2 | -12 | 1.88 | 0.43 |
| -9 | -2 | -12 | 1.10 | 0.30 |
| -9 | -2 | -12 | 0.93 | 0.50 |
| -9 | -2 | -12 | 0.95 | 0.29 |
| -9 | 2  | -12 | 0.69 | 0.29 |

## CIF S3

|    |    |     |       |      |
|----|----|-----|-------|------|
| -9 | 2  | -12 | 0.45  | 0.44 |
| -9 | 2  | -12 | 2.42  | 0.59 |
| 9  | 2  | 12  | 0.72  | 0.25 |
| 0  | 3  | -12 | 3.12  | 1.02 |
| 0  | -3 | -12 | 4.09  | 1.06 |
| 0  | -3 | 12  | 4.25  | 0.74 |
| 0  | 3  | -12 | 4.04  | 0.83 |
| 0  | -3 | 12  | 4.70  | 0.80 |
| 0  | 3  | 12  | 4.03  | 0.77 |
| 0  | 3  | 12  | 4.04  | 0.60 |
| 0  | -3 | 12  | 4.36  | 0.70 |
| 0  | -3 | -12 | 4.95  | 1.34 |
| -1 | 3  | 12  | -0.13 | 0.40 |
| -1 | 3  | 12  | 0.30  | 0.44 |
| 1  | 3  | -12 | 0.32  | 0.72 |
| 1  | -3 | 12  | 0.79  | 0.45 |
| -1 | -3 | -12 | 0.49  | 1.40 |
| -1 | 3  | 12  | 0.57  | 0.54 |
| 1  | -3 | 12  | 1.67  | 0.59 |
| 1  | 3  | -12 | 0.40  | 0.65 |
| -1 | 3  | -12 | 0.01  | 0.69 |
| 1  | -3 | -12 | 1.07  | 1.03 |
| -1 | -3 | 12  | 1.30  | 0.46 |
| -1 | 3  | -12 | 2.04  | 0.89 |
| -1 | -3 | 12  | -0.10 | 0.48 |
| 1  | 3  | 12  | 0.51  | 0.53 |
| 1  | -3 | -12 | 1.18  | 1.02 |
| -1 | -3 | 12  | 0.87  | 0.61 |
| -2 | 3  | 12  | 8.27  | 0.79 |
| 2  | 3  | -12 | 8.70  | 0.99 |
| -2 | -3 | -12 | 10.14 | 1.33 |
| -2 | 3  | 12  | 10.35 | 1.11 |
| 2  | -3 | 12  | 10.29 | 1.00 |
| 2  | 3  | -12 | 8.92  | 1.09 |
| -2 | 3  | 12  | 9.40  | 0.90 |
| 2  | -3 | 12  | 8.80  | 0.88 |
| -2 | -3 | 12  | 10.25 | 0.70 |
| -2 | -3 | 12  | 8.35  | 0.88 |
| -2 | -3 | 12  | 9.26  | 0.92 |
| 2  | -3 | -12 | 7.80  | 1.26 |
| 2  | 3  | 12  | 10.19 | 0.86 |

## CIF S3

|    |    |     |      |      |
|----|----|-----|------|------|
| 2  | -3 | -12 | 8.78 | 1.41 |
| -2 | 3  | -12 | 9.26 | 1.34 |
| -3 | 3  | 12  | 7.11 | 0.87 |
| -3 | 3  | 12  | 6.98 | 0.71 |
| 3  | -3 | 12  | 6.18 | 0.94 |
| -3 | -3 | -12 | 8.49 | 1.33 |
| -3 | 3  | 12  | 7.08 | 0.90 |
| 3  | 3  | -12 | 7.60 | 0.98 |
| 3  | 3  | -12 | 6.78 | 0.90 |
| -3 | -3 | 12  | 6.70 | 0.79 |
| -3 | -3 | 12  | 6.94 | 0.67 |
| -3 | 3  | -12 | 6.91 | 1.02 |
| 3  | -3 | -12 | 5.77 | 1.22 |
| 3  | -3 | -12 | 5.44 | 1.44 |
| 3  | 3  | 12  | 6.20 | 0.83 |
| -3 | 3  | -12 | 8.17 | 1.38 |
| -3 | -3 | 12  | 7.54 | 0.98 |
| 4  | -3 | 12  | 6.78 | 1.03 |
| -4 | -3 | -12 | 6.97 | 1.25 |
| -4 | 3  | 12  | 8.52 | 0.89 |
| -4 | 3  | 12  | 8.63 | 1.01 |
| -4 | 3  | -12 | 9.48 | 1.28 |
| -4 | -3 | 12  | 8.45 | 0.69 |
| -4 | 3  | -12 | 7.35 | 1.26 |
| -4 | 3  | -12 | 9.94 | 1.06 |
| 4  | -3 | -12 | 6.60 | 1.26 |
| -4 | -3 | 12  | 8.24 | 1.00 |
| -4 | -3 | 12  | 8.83 | 0.75 |
| 4  | 3  | 12  | 7.86 | 1.00 |
| -5 | 3  | 12  | 3.76 | 0.67 |
| -5 | -3 | -12 | 5.09 | 0.84 |
| 5  | -3 | 12  | 4.15 | 0.79 |
| -5 | 3  | 12  | 3.22 | 0.61 |
| -5 | 3  | 12  | 4.51 | 0.60 |
| -5 | 3  | 12  | 4.09 | 0.76 |
| -5 | 3  | 12  | 4.48 | 0.65 |
| -5 | 3  | 12  | 3.86 | 0.70 |
| 5  | -3 | 12  | 3.67 | 0.96 |
| -5 | -3 | -12 | 6.04 | 1.46 |
| -5 | -3 | 12  | 3.66 | 0.44 |
| 5  | 3  | 12  | 4.13 | 0.86 |



## CIF S3

|    |    |     |       |      |
|----|----|-----|-------|------|
| -5 | 3  | -12 | 4.88  | 1.22 |
| -5 | 3  | -12 | 3.42  | 1.18 |
| -5 | 3  | -12 | 4.06  | 1.05 |
| -5 | -3 | 12  | 4.21  | 0.40 |
| -5 | -3 | 12  | 5.06  | 0.51 |
| -5 | -3 | 12  | 5.36  | 1.09 |
| -6 | -3 | -12 | 1.83  | 1.19 |
| -6 | -3 | -12 | 1.74  | 0.48 |
| -6 | -3 | -12 | 1.70  | 0.61 |
| -6 | 3  | 12  | 0.65  | 0.42 |
| -6 | -3 | -12 | 1.59  | 0.62 |
| -6 | 3  | 12  | 1.14  | 0.34 |
| -6 | 3  | 12  | 1.37  | 0.32 |
| 6  | -3 | 12  | 1.47  | 0.46 |
| -6 | 3  | -12 | 1.62  | 0.91 |
| 6  | 3  | 12  | 1.53  | 0.49 |
| -6 | -3 | 12  | 2.20  | 0.93 |
| -6 | 3  | -12 | 1.65  | 0.99 |
| -7 | 3  | 12  | 1.58  | 0.41 |
| -7 | -3 | -12 | 1.57  | 0.55 |
| -7 | -3 | -12 | 1.96  | 0.69 |
| -7 | -3 | -12 | 2.17  | 1.20 |
| -7 | 3  | 12  | 1.12  | 0.29 |
| -7 | -3 | -12 | 1.49  | 0.64 |
| 7  | -3 | 12  | 1.25  | 0.41 |
| -7 | -3 | -12 | 2.72  | 1.06 |
| -7 | 3  | -12 | 2.85  | 0.96 |
| -7 | 3  | -12 | 1.54  | 0.55 |
| -7 | 3  | -12 | 1.48  | 0.37 |
| 7  | 3  | 12  | 2.11  | 0.75 |
| -7 | 3  | -12 | 0.79  | 0.93 |
| -7 | 3  | -12 | 2.12  | 0.56 |
| -8 | -3 | -12 | 11.08 | 1.30 |
| -8 | -3 | -12 | 12.06 | 0.85 |
| -8 | -3 | -12 | 10.26 | 0.86 |
| -8 | -3 | -12 | 9.97  | 0.90 |
| 8  | -3 | 12  | 11.18 | 0.79 |
| -8 | -3 | -12 | 9.95  | 1.09 |
| 8  | 3  | 12  | 12.16 | 0.86 |
| -8 | 3  | -12 | 13.01 | 1.22 |
| -8 | 3  | -12 | 9.99  | 0.87 |

## CIF S3

|    |    |     |       |      |
|----|----|-----|-------|------|
| 0  | -4 | 12  | -0.27 | 0.54 |
| 0  | -4 | 12  | 0.48  | 0.50 |
| 0  | 4  | 12  | -0.04 | 0.44 |
| 0  | -4 | 12  | 0.56  | 0.68 |
| 0  | 4  | -12 | 0.19  | 0.79 |
| 0  | -4 | -12 | 0.82  | 1.06 |
| 0  | 4  | -12 | 0.51  | 0.72 |
| 0  | 4  | 12  | 0.71  | 0.51 |
| 1  | -4 | 12  | 7.13  | 0.78 |
| -1 | 4  | 12  | 6.17  | 0.98 |
| 1  | 4  | -12 | 7.52  | 1.12 |
| 1  | 4  | -12 | 8.30  | 1.01 |
| -1 | 4  | 12  | 8.34  | 0.83 |
| 1  | -4 | 12  | 6.64  | 0.92 |
| -1 | 4  | 12  | 7.52  | 0.73 |
| 1  | -4 | 12  | 7.01  | 0.76 |
| -1 | -4 | 12  | 9.00  | 0.92 |
| -1 | 4  | -12 | 6.68  | 1.14 |
| -1 | -4 | 12  | 8.21  | 0.78 |
| 1  | -4 | -12 | 8.74  | 1.53 |
| -1 | 4  | -12 | 6.77  | 1.12 |
| 1  | -4 | -12 | 5.79  | 1.17 |
| 1  | 4  | 12  | 7.81  | 0.86 |
| -1 | -4 | 12  | 6.90  | 0.76 |
| 1  | 4  | 12  | 7.89  | 0.83 |
| -2 | -4 | -12 | 1.24  | 0.92 |
| 2  | -4 | 12  | 1.90  | 0.71 |
| -2 | 4  | 12  | 1.95  | 0.66 |
| -2 | 4  | 12  | 1.63  | 0.51 |
| 2  | -4 | 12  | 2.03  | 0.63 |
| 2  | 4  | -12 | 1.46  | 0.66 |
| 2  | 4  | -12 | 2.78  | 0.82 |
| -2 | -4 | 12  | 3.16  | 0.71 |
| -2 | -4 | 12  | 2.52  | 0.61 |
| 2  | 4  | 12  | 2.49  | 0.68 |
| -2 | 4  | -12 | 2.14  | 1.24 |
| 2  | -4 | -12 | 2.19  | 1.19 |
| 2  | -4 | -12 | 2.53  | 1.19 |
| -2 | -4 | 12  | 2.32  | 0.45 |
| -2 | -4 | 12  | 2.48  | 0.45 |
| 3  | 4  | -12 | 0.14  | 0.57 |

## CIF S3

|    |    |     |       |      |
|----|----|-----|-------|------|
| -3 | -4 | -12 | 1.68  | 0.88 |
| -3 | 4  | 12  | 0.06  | 0.48 |
| -3 | 4  | 12  | 0.61  | 0.59 |
| 3  | 4  | -12 | 0.01  | 0.67 |
| 3  | -4 | 12  | 0.50  | 0.61 |
| -3 | -4 | 12  | 0.88  | 0.55 |
| 3  | -4 | -12 | 1.18  | 1.19 |
| 3  | -4 | -12 | 1.34  | 1.15 |
| -3 | -4 | 12  | 1.68  | 0.46 |
| 3  | 4  | 12  | 0.67  | 0.59 |
| -3 | 4  | -12 | 0.51  | 0.68 |
| -3 | -4 | 12  | 1.49  | 0.66 |
| -3 | 4  | -12 | 1.08  | 0.97 |
| 4  | -4 | 12  | 51.03 | 2.81 |
| -4 | -4 | -12 | 56.75 | 3.01 |
| -4 | 4  | 12  | 50.89 | 2.67 |
| -4 | 4  | -12 | 41.80 | 3.03 |
| -4 | -4 | 12  | 49.34 | 2.61 |
| 4  | 4  | 12  | 52.36 | 2.82 |
| -4 | 4  | -12 | 53.59 | 2.91 |
| -4 | -4 | 12  | 50.59 | 2.78 |
| -4 | -4 | 12  | 51.16 | 2.61 |
| 5  | -4 | 12  | 4.10  | 0.97 |
| -5 | 4  | 12  | 4.59  | 0.78 |
| 5  | -4 | 12  | 5.81  | 0.75 |
| -5 | 4  | 12  | 5.26  | 0.83 |
| -5 | -4 | -12 | 7.73  | 1.65 |
| -5 | -4 | -12 | 5.90  | 0.89 |
| -5 | 4  | 12  | 4.39  | 0.79 |
| -5 | -4 | -12 | 3.51  | 1.12 |
| -5 | 4  | 12  | 5.45  | 0.70 |
| -5 | 4  | -12 | 5.59  | 1.16 |
| -5 | -4 | 12  | 5.03  | 0.50 |
| -5 | 4  | -12 | 5.23  | 0.98 |
| 5  | 4  | 12  | 4.46  | 0.85 |
| -5 | 4  | -12 | 4.84  | 1.14 |
| -5 | -4 | 12  | 5.59  | 0.55 |
| -5 | -4 | 12  | 7.15  | 1.05 |
| -5 | -4 | 12  | 4.70  | 0.47 |
| -5 | -4 | 12  | 5.17  | 0.44 |
| -6 | -4 | -12 | -0.02 | 0.59 |

## CIF S3

|    |    |     |       |      |
|----|----|-----|-------|------|
| -6 | -4 | -12 | -0.95 | 1.07 |
| -6 | 4  | 12  | 0.10  | 0.34 |
| -6 | -4 | -12 | 0.36  | 0.37 |
| -6 | 4  | 12  | 0.82  | 0.47 |
| 6  | -4 | 12  | -0.01 | 0.40 |
| -6 | 4  | 12  | 0.12  | 0.36 |
| -6 | -4 | -12 | 0.14  | 0.66 |
| -6 | 4  | 12  | 0.00  | 0.44 |
| -6 | 4  | -12 | 0.08  | 0.91 |
| -6 | 4  | -12 | -0.27 | 1.01 |
| 6  | 4  | 12  | 0.01  | 0.44 |
| -7 | 4  | 12  | 0.59  | 0.31 |
| -7 | -4 | -12 | -0.03 | 0.57 |
| -7 | 4  | 12  | -0.08 | 0.30 |
| -7 | -4 | -12 | 0.23  | 0.57 |
| -7 | -4 | -12 | 0.18  | 0.97 |
| -7 | -4 | -12 | 0.72  | 0.90 |
| -7 | -4 | -12 | 0.71  | 0.52 |
| 7  | -4 | 12  | 0.06  | 0.32 |
| -7 | 4  | -12 | -0.34 | 0.53 |
| -7 | 4  | -12 | -0.01 | 0.79 |
| -7 | 4  | -12 | -0.14 | 0.50 |
| 7  | 4  | 12  | 0.38  | 0.42 |
| -7 | 4  | -12 | 0.27  | 0.31 |
| -8 | -4 | -12 | 6.83  | 0.75 |
| -8 | -4 | -12 | 7.06  | 0.67 |
| -8 | -4 | -12 | 7.32  | 1.10 |
| -8 | -4 | -12 | 5.91  | 0.73 |
| -8 | 4  | -12 | 6.67  | 1.00 |
| -8 | 4  | -12 | 6.10  | 0.72 |
| 8  | 4  | 12  | 6.26  | 0.71 |
| 8  | 4  | 12  | 7.11  | 0.69 |
| 0  | -5 | 12  | 13.27 | 1.15 |
| 0  | 5  | -12 | 10.20 | 1.33 |
| 0  | -5 | -12 | 9.72  | 1.55 |
| 0  | 5  | 12  | 10.90 | 0.91 |
| 0  | 5  | 12  | 10.69 | 0.87 |
| 0  | 5  | -12 | 10.19 | 1.23 |
| 0  | -5 | 12  | 10.22 | 1.01 |
| 0  | -5 | 12  | 8.94  | 0.95 |
| 0  | -5 | 12  | 10.76 | 1.36 |

## CIF S3

|    |    |     |       |      |
|----|----|-----|-------|------|
| -1 | 5  | 12  | 1.25  | 0.55 |
| 1  | -5 | 12  | 1.95  | 0.58 |
| 1  | -5 | 12  | 1.78  | 0.65 |
| 1  | -5 | 12  | 1.17  | 0.66 |
| -1 | 5  | 12  | 1.13  | 0.53 |
| 1  | 5  | -12 | 1.80  | 0.81 |
| 1  | 5  | -12 | 2.75  | 0.88 |
| -1 | 5  | -12 | 2.05  | 0.85 |
| 1  | -5 | -12 | 1.20  | 2.04 |
| -1 | 5  | -12 | 1.51  | 1.05 |
| -1 | -5 | 12  | 0.77  | 0.55 |
| 1  | 5  | 12  | 1.36  | 0.58 |
| 1  | -5 | -12 | 0.20  | 1.22 |
| -1 | -5 | 12  | 2.37  | 0.69 |
| -1 | -5 | 12  | 2.43  | 0.56 |
| -2 | -5 | -12 | 0.42  | 0.91 |
| -2 | 5  | 12  | 0.48  | 0.67 |
| -2 | 5  | 12  | 0.43  | 0.53 |
| 2  | -5 | 12  | -0.12 | 0.55 |
| 2  | 5  | -12 | 0.70  | 0.71 |
| 2  | 5  | -12 | 0.83  | 0.66 |
| 2  | -5 | 12  | 0.16  | 0.58 |
| 2  | -5 | 12  | -0.28 | 0.65 |
| -2 | -5 | 12  | 0.23  | 0.63 |
| -2 | -5 | 12  | 1.25  | 0.79 |
| 2  | -5 | -12 | 1.09  | 1.20 |
| 2  | -5 | -12 | 1.37  | 1.26 |
| 2  | 5  | 12  | -0.03 | 0.61 |
| -2 | -5 | 12  | 0.99  | 0.63 |
| -2 | -5 | 12  | 0.34  | 0.33 |
| -3 | 5  | 12  | 24.76 | 1.61 |
| 3  | 5  | -12 | 23.42 | 1.61 |
| 3  | -5 | 12  | 27.49 | 1.72 |
| -3 | 5  | 12  | 25.75 | 1.49 |
| -3 | -5 | -12 | 27.30 | 1.96 |
| -3 | 5  | -12 | 19.89 | 1.85 |
| 3  | -5 | -12 | 23.94 | 2.02 |
| 3  | 5  | 12  | 24.48 | 1.60 |
| -3 | -5 | 12  | 24.09 | 1.44 |
| -3 | -5 | 12  | 26.04 | 1.60 |
| -3 | -5 | 12  | 28.62 | 1.53 |

## CIF S3

|    |    |     |       |      |
|----|----|-----|-------|------|
| -4 | -5 | -12 | 6.22  | 1.31 |
| 4  | -5 | 12  | 7.25  | 1.00 |
| -4 | 5  | 12  | 6.03  | 1.18 |
| -4 | 5  | 12  | 7.20  | 1.23 |
| 4  | -5 | 12  | 7.48  | 1.32 |
| -4 | 5  | 12  | 7.79  | 0.85 |
| -4 | 5  | 12  | 7.13  | 0.99 |
| 4  | 5  | 12  | 7.62  | 0.84 |
| -4 | -5 | 12  | 7.78  | 0.67 |
| 4  | 5  | 12  | 7.17  | 0.90 |
| -4 | 5  | -12 | 8.64  | 1.28 |
| -4 | -5 | 12  | 6.14  | 0.78 |
| -4 | 5  | -12 | 7.92  | 1.64 |
| -4 | 5  | -12 | 5.97  | 1.98 |
| -4 | -5 | 12  | 6.76  | 0.65 |
| -4 | -5 | 12  | 7.09  | 0.72 |
| -4 | -5 | 12  | 7.72  | 0.96 |
| -4 | 5  | -12 | 6.54  | 1.03 |
| 4  | 5  | 12  | 7.17  | 1.05 |
| -5 | -5 | -12 | 5.50  | 1.51 |
| -5 | 5  | 12  | 6.35  | 0.86 |
| -5 | -5 | -12 | 5.94  | 1.76 |
| -5 | -5 | -12 | 7.00  | 0.94 |
| -5 | 5  | 12  | 6.72  | 0.81 |
| -5 | 5  | 12  | 5.74  | 0.83 |
| -5 | 5  | 12  | 4.76  | 0.90 |
| -5 | -5 | -12 | 6.23  | 1.42 |
| -5 | -5 | 12  | 5.30  | 0.48 |
| -5 | 5  | -12 | 5.83  | 1.42 |
| -5 | 5  | -12 | 5.21  | 1.29 |
| -5 | -5 | 12  | 7.37  | 1.05 |
| -5 | 5  | -12 | 6.62  | 1.13 |
| -5 | -5 | 12  | 6.25  | 0.54 |
| -5 | 5  | -12 | 6.48  | 1.41 |
| 5  | 5  | 12  | 6.20  | 0.91 |
| 5  | 5  | 12  | 5.57  | 0.74 |
| -5 | -5 | 12  | 6.56  | 0.52 |
| -6 | -5 | -12 | 9.86  | 1.50 |
| -6 | 5  | 12  | 9.19  | 0.82 |
| -6 | -5 | -12 | 10.55 | 1.06 |
| -6 | 5  | 12  | 8.90  | 0.76 |

## CIF S3

|    |    |     |       |      |
|----|----|-----|-------|------|
| -6 | 5  | 12  | 9.00  | 0.78 |
| -6 | -5 | -12 | 10.12 | 1.04 |
| -6 | -5 | -12 | 10.67 | 1.40 |
| -6 | -5 | -12 | 10.07 | 1.40 |
| -6 | 5  | 12  | 9.04  | 0.90 |
| 6  | 5  | 12  | 10.94 | 0.88 |
| 6  | 5  | 12  | 9.18  | 0.94 |
| -6 | 5  | -12 | 7.44  | 1.40 |
| -7 | -5 | -12 | 2.97  | 0.79 |
| -7 | -5 | -12 | 0.81  | 0.92 |
| -7 | 5  | 12  | 2.31  | 0.51 |
| -7 | -5 | -12 | 2.85  | 0.71 |
| -7 | -5 | -12 | 1.05  | 0.55 |
| -7 | 5  | -12 | 2.03  | 0.43 |
| 7  | 5  | 12  | 2.44  | 0.47 |
| -7 | 5  | -12 | 3.14  | 0.84 |
| -7 | 5  | -12 | 1.55  | 0.54 |
| 7  | 5  | 12  | 2.86  | 0.68 |
| -8 | 5  | 12  | 0.08  | 0.12 |
| -8 | -5 | -12 | -0.17 | 0.37 |
| -8 | -5 | -12 | 0.42  | 0.37 |
| -8 | -5 | -12 | 0.03  | 0.59 |
| -8 | 5  | 12  | -0.03 | 0.12 |
| -8 | -5 | -12 | 0.06  | 0.39 |
| 8  | 5  | 12  | 0.09  | 0.29 |
| 8  | 5  | 12  | 0.03  | 0.33 |
| -8 | 5  | -12 | -0.53 | 0.54 |
| -8 | 5  | -12 | -0.09 | 0.42 |
| 0  | -6 | 12  | 2.59  | 0.90 |
| 0  | 6  | -12 | 4.55  | 1.07 |
| 0  | -6 | 12  | 3.47  | 0.82 |
| 0  | 6  | -12 | 3.64  | 0.98 |
| 0  | -6 | 12  | 2.73  | 0.72 |
| 0  | 6  | 12  | 2.76  | 0.76 |
| 0  | -6 | 12  | 2.48  | 0.66 |
| 0  | 6  | 12  | 3.83  | 0.75 |
| 0  | -6 | 12  | 4.11  | 0.84 |
| 1  | 6  | -12 | 27.56 | 1.94 |
| 1  | -6 | 12  | 32.35 | 1.73 |
| 1  | -6 | 12  | 26.56 | 1.73 |
| -1 | 6  | 12  | 26.43 | 1.67 |

## CIF S3

|    |    |     |       |      |
|----|----|-----|-------|------|
| 1  | -6 | 12  | 29.53 | 1.70 |
| 1  | -6 | 12  | 30.35 | 1.93 |
| -1 | 6  | 12  | 28.66 | 1.65 |
| -1 | -6 | 12  | 27.69 | 1.53 |
| -1 | -6 | 12  | 26.06 | 1.65 |
| 1  | 6  | 12  | 29.80 | 1.72 |
| -1 | -6 | 12  | 29.69 | 1.75 |
| -1 | 6  | -12 | 28.16 | 2.05 |
| 1  | -6 | -12 | 23.75 | 2.22 |
| -1 | -6 | 12  | 28.34 | 1.74 |
| -2 | 6  | 12  | 8.80  | 1.27 |
| 2  | -6 | 12  | 8.49  | 1.04 |
| 2  | -6 | 12  | 8.56  | 1.00 |
| 2  | -6 | 12  | 7.78  | 1.42 |
| 2  | 6  | -12 | 8.88  | 1.11 |
| -2 | 6  | 12  | 9.70  | 0.98 |
| 2  | -6 | 12  | 8.89  | 1.00 |
| -2 | -6 | -12 | 8.60  | 1.55 |
| 2  | -6 | -12 | 8.12  | 1.56 |
| -2 | -6 | 12  | 9.09  | 0.66 |
| -2 | -6 | 12  | 9.78  | 1.03 |
| -2 | -6 | 12  | 9.46  | 1.02 |
| 2  | 6  | 12  | 8.78  | 1.02 |
| 3  | -6 | 12  | 24.70 | 1.70 |
| -3 | 6  | 12  | 23.64 | 1.66 |
| -3 | -6 | -12 | 23.80 | 1.99 |
| 3  | -6 | 12  | 24.66 | 1.62 |
| -3 | 6  | 12  | 23.41 | 1.51 |
| -3 | -6 | 12  | 25.61 | 1.45 |
| -3 | -6 | 12  | 26.07 | 1.65 |
| -3 | -6 | 12  | 25.24 | 1.50 |
| 3  | 6  | 12  | 26.39 | 1.66 |
| -4 | 6  | 12  | 9.33  | 0.97 |
| -4 | 6  | 12  | 7.35  | 1.13 |
| -4 | 6  | 12  | 9.11  | 1.00 |
| -4 | -6 | -12 | 8.44  | 1.39 |
| -4 | 6  | 12  | 8.50  | 0.91 |
| -4 | -6 | -12 | 8.69  | 1.20 |
| 4  | -6 | 12  | 9.40  | 1.13 |
| -4 | 6  | 12  | 8.44  | 1.03 |
| -4 | 6  | 12  | 10.96 | 1.08 |



## CIF S3

|    |    |     |       |      |
|----|----|-----|-------|------|
| 4  | -6 | 12  | 9.24  | 1.16 |
| -4 | -6 | 12  | 8.09  | 0.63 |
| -4 | -6 | 12  | 7.95  | 0.70 |
| -4 | 6  | -12 | 8.66  | 1.43 |
| 4  | 6  | 12  | 9.08  | 0.95 |
| 4  | 6  | 12  | 8.28  | 0.88 |
| -4 | -6 | 12  | 8.62  | 1.10 |
| -4 | 6  | -12 | 7.49  | 1.09 |
| -4 | -6 | 12  | 10.48 | 0.76 |
| -4 | -6 | 12  | 8.56  | 0.73 |
| -4 | 6  | -12 | 9.18  | 1.30 |
| -5 | 6  | 12  | 3.73  | 0.89 |
| -5 | -6 | -12 | 4.99  | 1.01 |
| -5 | 6  | 12  | 3.74  | 0.77 |
| -5 | -6 | -12 | 4.00  | 0.88 |
| -5 | 6  | 12  | 3.14  | 0.82 |
| -5 | -6 | -12 | 3.78  | 1.10 |
| -5 | -6 | -12 | 1.69  | 0.74 |
| -5 | -6 | 12  | 3.56  | 0.42 |
| -5 | -6 | 12  | 3.80  | 0.43 |
| -5 | 6  | -12 | 4.32  | 0.97 |
| -5 | -6 | 12  | 4.58  | 0.46 |
| 5  | 6  | 12  | 3.72  | 0.75 |
| 5  | 6  | 12  | 4.19  | 0.77 |
| -6 | 6  | 12  | 2.79  | 0.52 |
| -6 | -6 | -12 | 2.20  | 0.98 |
| -6 | -6 | -12 | 3.17  | 0.88 |
| -6 | -6 | -12 | 2.59  | 0.67 |
| -6 | -6 | -12 | 3.76  | 1.00 |
| -6 | -6 | -12 | 1.99  | 0.97 |
| -6 | 6  | 12  | 2.39  | 0.47 |
| -6 | 6  | 12  | 4.17  | 0.66 |
| 6  | 6  | 12  | 3.49  | 0.79 |
| -6 | 6  | -12 | 2.06  | 0.89 |
| 6  | 6  | 12  | 4.84  | 0.72 |
| -7 | 6  | 12  | 2.19  | 0.52 |
| -7 | -6 | -12 | 1.93  | 0.77 |
| -7 | -6 | -12 | 3.16  | 0.48 |
| -7 | 6  | 12  | 3.29  | 0.51 |
| -7 | -6 | -12 | 3.40  | 0.80 |
| -7 | -6 | -12 | 4.01  | 0.82 |

## CIF S3

|    |    |     |       |      |
|----|----|-----|-------|------|
| 7  | 6  | 12  | 3.15  | 0.64 |
| 7  | 6  | 12  | 3.30  | 0.63 |
| -7 | 6  | -12 | 1.76  | 0.74 |
| -8 | 6  | 12  | 1.89  | 0.21 |
| -8 | -6 | -12 | 2.47  | 0.55 |
| -8 | 6  | 12  | 2.10  | 0.21 |
| -8 | -6 | -12 | 2.60  | 0.49 |
| -8 | -6 | -12 | 1.97  | 0.49 |
| 8  | 6  | 12  | 2.83  | 0.46 |
| -8 | 6  | -12 | 2.92  | 0.56 |
| -8 | 6  | -12 | 0.24  | 0.58 |
| 0  | 7  | -12 | 7.56  | 1.84 |
| 0  | -7 | 12  | 8.14  | 0.92 |
| 0  | -7 | 12  | 7.07  | 0.89 |
| 0  | -7 | 12  | 8.51  | 1.03 |
| 0  | 7  | 12  | 7.38  | 1.03 |
| 0  | -7 | 12  | 7.89  | 1.06 |
| 0  | -7 | 12  | 9.04  | 1.15 |
| 0  | 7  | 12  | 8.17  | 0.98 |
| -1 | 7  | 12  | 3.32  | 0.79 |
| -1 | 7  | 12  | 1.94  | 0.66 |
| -1 | -7 | -12 | 1.43  | 1.13 |
| 1  | -7 | 12  | 1.36  | 0.91 |
| 1  | -7 | 12  | 2.48  | 0.77 |
| 1  | -7 | 12  | 2.11  | 0.67 |
| 1  | -7 | 12  | 1.79  | 0.74 |
| -1 | 7  | -12 | 1.30  | 0.92 |
| -1 | -7 | 12  | 1.74  | 0.63 |
| -1 | -7 | 12  | 2.92  | 0.79 |
| -1 | -7 | 12  | 2.81  | 0.51 |
| -1 | -7 | 12  | 1.59  | 0.65 |
| 1  | 7  | 12  | 1.47  | 0.62 |
| -2 | 7  | 12  | 7.76  | 1.55 |
| -2 | 7  | 12  | 11.89 | 1.04 |
| 2  | -7 | 12  | 10.29 | 1.41 |
| 2  | -7 | 12  | 10.20 | 1.00 |
| 2  | -7 | 12  | 11.80 | 1.14 |
| -2 | 7  | 12  | 8.03  | 1.32 |
| 2  | -7 | 12  | 11.25 | 1.05 |
| -2 | 7  | 12  | 9.79  | 1.35 |
| 2  | -7 | 12  | 11.64 | 2.09 |

## CIF S3

|    |    |     |       |      |
|----|----|-----|-------|------|
| 2  | -7 | 12  | 11.27 | 1.77 |
| -2 | -7 | -12 | 8.51  | 1.53 |
| 2  | -7 | 12  | 11.33 | 1.78 |
| -2 | -7 | -12 | 15.62 | 1.71 |
| -2 | 7  | 12  | 11.15 | 0.80 |
| 2  | 7  | 12  | 8.39  | 1.10 |
| -2 | -7 | 12  | 12.27 | 1.25 |
| -2 | -7 | 12  | 10.66 | 0.72 |
| -2 | -7 | 12  | 10.91 | 1.09 |
| -2 | -7 | 12  | 11.75 | 1.19 |
| -2 | -7 | 12  | 10.91 | 1.08 |
| 2  | 7  | 12  | 9.26  | 0.98 |
| 3  | -7 | 12  | 0.60  | 0.48 |
| 3  | -7 | 12  | 1.73  | 0.80 |
| 3  | -7 | 12  | 3.19  | 1.09 |
| -3 | -7 | -12 | 1.47  | 0.62 |
| -3 | 7  | 12  | 1.11  | 0.65 |
| 3  | -7 | 12  | 0.86  | 0.72 |
| 3  | -7 | 12  | 1.57  | 0.74 |
| -3 | 7  | 12  | 2.07  | 0.75 |
| 3  | -7 | 12  | 1.50  | 0.80 |
| 3  | -7 | 12  | 1.98  | 1.11 |
| -3 | 7  | 12  | 1.62  | 0.66 |
| -3 | -7 | -12 | 0.72  | 1.06 |
| -3 | 7  | 12  | 1.05  | 0.72 |
| -3 | -7 | -12 | 0.37  | 0.33 |
| -3 | 7  | 12  | 0.48  | 0.58 |
| -3 | 7  | 12  | 0.93  | 0.70 |
| 3  | 7  | 12  | 0.72  | 0.52 |
| 3  | 7  | 12  | 1.01  | 0.67 |
| -3 | -7 | 12  | 1.07  | 0.45 |
| -3 | -7 | 12  | 1.49  | 0.41 |
| -3 | -7 | 12  | 1.43  | 0.43 |
| -3 | -7 | 12  | 1.40  | 0.60 |
| -3 | -7 | 12  | 1.67  | 0.45 |
| -3 | -7 | 12  | 1.21  | 0.65 |
| -4 | -7 | -12 | 14.00 | 1.54 |
| -4 | 7  | 12  | 13.88 | 1.20 |
| -4 | 7  | 12  | 13.63 | 1.17 |
| 4  | -7 | 12  | 14.63 | 1.58 |
| -4 | 7  | 12  | 13.95 | 1.18 |

## CIF S3

|    |    |     |       |      |
|----|----|-----|-------|------|
| -4 | -7 | -12 | 13.40 | 1.27 |
| -4 | 7  | 12  | 14.59 | 1.23 |
| -4 | 7  | 12  | 12.87 | 1.08 |
| -4 | 7  | 12  | 15.89 | 1.25 |
| -4 | -7 | 12  | 13.82 | 0.81 |
| -4 | -7 | 12  | 15.02 | 1.22 |
| -4 | -7 | 12  | 13.40 | 0.91 |
| 4  | 7  | 12  | 12.86 | 1.04 |
| -4 | -7 | 12  | 14.10 | 0.96 |
| -5 | -7 | -12 | 0.66  | 0.73 |
| -5 | -7 | -12 | 0.31  | 0.38 |
| -5 | -7 | -12 | 0.80  | 0.98 |
| -5 | -7 | -12 | -0.14 | 0.40 |
| 5  | -7 | 12  | -1.13 | 0.99 |
| -5 | -7 | -12 | 0.47  | 0.71 |
| -5 | 7  | 12  | 0.45  | 0.57 |
| -5 | 7  | 12  | 0.52  | 0.48 |
| -5 | 7  | 12  | -0.29 | 0.52 |
| 5  | 7  | 12  | 0.35  | 0.46 |
| 5  | 7  | 12  | 0.14  | 0.43 |
| -5 | -7 | 12  | 0.01  | 0.23 |
| -5 | 7  | -12 | 0.60  | 0.85 |
| -5 | -7 | 12  | 0.11  | 0.28 |
| -5 | -7 | 12  | -0.02 | 0.25 |
| -6 | -7 | -12 | 1.31  | 0.55 |
| -6 | -7 | -12 | 1.93  | 0.63 |
| -6 | 7  | 12  | 1.83  | 0.43 |
| -6 | 7  | 12  | 1.11  | 0.48 |
| -6 | -7 | -12 | 2.07  | 0.94 |
| -6 | -7 | -12 | 1.57  | 0.58 |
| -6 | -7 | -12 | 0.18  | 1.16 |
| -6 | 7  | 12  | 1.63  | 0.41 |
| -6 | 7  | -12 | 1.36  | 0.81 |
| -6 | 7  | -12 | 1.00  | 0.61 |
| 6  | 7  | 12  | 1.78  | 0.45 |
| 6  | 7  | 12  | 0.98  | 0.44 |
| -7 | -7 | -12 | 0.38  | 0.26 |
| -7 | 7  | 12  | 0.58  | 0.28 |
| -7 | -7 | -12 | 0.48  | 0.45 |
| -7 | -7 | -12 | 0.77  | 0.45 |
| -7 | 7  | 12  | 0.74  | 0.29 |

## CIF S3

|    |    |     |       |      |
|----|----|-----|-------|------|
| -7 | 7  | -12 | 1.40  | 0.67 |
| 7  | 7  | 12  | 1.44  | 0.38 |
| 0  | 8  | 12  | 22.93 | 1.58 |
| 0  | -8 | 12  | 22.25 | 1.56 |
| 0  | -8 | 12  | 21.56 | 1.51 |
| 0  | -8 | 12  | 25.04 | 1.64 |
| 0  | -8 | 12  | 25.01 | 1.51 |
| 0  | -8 | 12  | 25.07 | 1.61 |
| 0  | -8 | 12  | 22.78 | 1.57 |
| 0  | -8 | 12  | 23.13 | 1.69 |
| 0  | 8  | 12  | 21.63 | 1.68 |
| 0  | -8 | 12  | 26.29 | 1.51 |
| 0  | -8 | 12  | 27.83 | 1.74 |
| 0  | -8 | 12  | 23.93 | 1.43 |
| 0  | 8  | 12  | 21.66 | 1.58 |
| 0  | 8  | 12  | 21.73 | 1.49 |
| 1  | -8 | 12  | 1.27  | 0.63 |
| -1 | -8 | -12 | 2.50  | 1.21 |
| -1 | 8  | 12  | 0.80  | 0.63 |
| -1 | -8 | -12 | 2.19  | 0.94 |
| 1  | -8 | 12  | 1.39  | 1.11 |
| 1  | -8 | 12  | 1.76  | 0.72 |
| -1 | 8  | 12  | 0.89  | 0.42 |
| 1  | -8 | 12  | 1.53  | 0.61 |
| 1  | -8 | 12  | 1.16  | 0.84 |
| 1  | -8 | 12  | 1.61  | 0.78 |
| -1 | 8  | 12  | 1.08  | 0.72 |
| -1 | 8  | 12  | 3.23  | 0.82 |
| -1 | 8  | 12  | 2.02  | 0.69 |
| -1 | 8  | 12  | 1.07  | 0.73 |
| 1  | -8 | 12  | 1.71  | 0.72 |
| 1  | -8 | 12  | 1.25  | 0.72 |
| -1 | -8 | 12  | 1.00  | 0.75 |
| -1 | -8 | 12  | 1.24  | 0.69 |
| -1 | -8 | 12  | 1.76  | 0.55 |
| -1 | -8 | 12  | 1.53  | 0.78 |
| -1 | -8 | 12  | 1.72  | 0.63 |
| 1  | 8  | 12  | 1.52  | 0.55 |
| 1  | 8  | 12  | 0.64  | 0.62 |
| -1 | -8 | 12  | 1.59  | 0.60 |
| -1 | -8 | 12  | 1.48  | 1.08 |

## CIF S3

|    |    |     |      |      |
|----|----|-----|------|------|
| -1 | -8 | 12  | 1.59 | 0.66 |
| -1 | -8 | 12  | 0.87 | 0.57 |
| -2 | 8  | 12  | 1.98 | 0.72 |
| 2  | -8 | 12  | 3.71 | 1.00 |
| 2  | -8 | 12  | 2.20 | 0.73 |
| 2  | -8 | 12  | 1.92 | 0.76 |
| 2  | -8 | 12  | 2.83 | 1.37 |
| -2 | 8  | 12  | 3.75 | 0.70 |
| -2 | 8  | 12  | 2.01 | 0.71 |
| -2 | -8 | -12 | 3.26 | 0.77 |
| 2  | -8 | 12  | 5.28 | 1.07 |
| 2  | -8 | 12  | 4.53 | 1.16 |
| -2 | 8  | 12  | 3.68 | 1.05 |
| 2  | -8 | 12  | 2.96 | 0.91 |
| -2 | 8  | 12  | 2.99 | 0.50 |
| 2  | -8 | 12  | 2.28 | 0.77 |
| -2 | -8 | -12 | 2.10 | 1.15 |
| -2 | -8 | 12  | 3.55 | 0.81 |
| -2 | -8 | 12  | 3.46 | 0.76 |
| -2 | -8 | 12  | 4.92 | 0.92 |
| 2  | 8  | 12  | 0.85 | 0.62 |
| 2  | 8  | 12  | 3.49 | 0.72 |
| -2 | -8 | 12  | 3.69 | 0.82 |
| -2 | -8 | 12  | 2.55 | 0.69 |
| 3  | -8 | 12  | 1.56 | 0.72 |
| 3  | -8 | 12  | 1.23 | 1.00 |
| -3 | 8  | 12  | 1.34 | 0.64 |
| -3 | 8  | 12  | 3.02 | 0.81 |
| 3  | -8 | 12  | 1.14 | 0.46 |
| 3  | -8 | 12  | 1.51 | 0.72 |
| -3 | 8  | 12  | 4.31 | 1.21 |
| 3  | -8 | 12  | 2.72 | 1.04 |
| 3  | -8 | 12  | 2.47 | 0.74 |
| -3 | 8  | 12  | 1.95 | 0.64 |
| -3 | 8  | 12  | 1.63 | 0.67 |
| -3 | 8  | 12  | 1.53 | 0.77 |
| 3  | 8  | 12  | 1.83 | 0.49 |
| -3 | -8 | 12  | 1.31 | 0.47 |
| -3 | -8 | 12  | 2.96 | 0.72 |
| -3 | -8 | 12  | 2.46 | 0.45 |
| -3 | -8 | 12  | 2.46 | 0.60 |

## CIF S3

|    |    |     |       |      |
|----|----|-----|-------|------|
| -3 | -8 | 12  | 2.11  | 0.59 |
| -3 | -8 | 12  | 1.23  | 0.69 |
| -4 | 8  | 12  | 6.62  | 1.06 |
| -4 | 8  | 12  | 8.96  | 1.02 |
| 4  | -8 | 12  | 6.98  | 1.15 |
| -4 | -8 | -12 | 10.22 | 1.26 |
| -4 | 8  | 12  | 7.99  | 0.91 |
| -4 | 8  | 12  | 8.13  | 1.07 |
| -4 | -8 | -12 | 7.93  | 1.04 |
| 4  | -8 | 12  | 8.78  | 1.39 |
| -4 | -8 | -12 | 8.78  | 1.36 |
| -4 | -8 | -12 | 6.23  | 1.05 |
| -4 | 8  | 12  | 7.12  | 0.97 |
| -4 | -8 | 12  | 8.44  | 0.70 |
| 4  | 8  | 12  | 8.96  | 0.90 |
| -4 | -8 | 12  | 8.77  | 0.52 |
| -4 | 8  | -12 | 10.02 | 1.32 |
| -5 | 8  | 12  | 0.97  | 0.64 |
| -5 | -8 | -12 | -0.39 | 0.63 |
| -5 | -8 | -12 | -0.10 | 0.62 |
| -5 | 8  | 12  | 0.17  | 0.50 |
| -5 | -8 | -12 | 0.04  | 0.88 |
| -5 | 8  | 12  | 0.27  | 0.55 |
| -5 | -8 | -12 | 0.58  | 0.33 |
| -5 | 8  | 12  | -0.40 | 0.45 |
| -5 | -8 | -12 | -0.59 | 0.90 |
| -5 | -8 | 12  | 0.46  | 0.25 |
| -5 | -8 | 12  | 0.50  | 0.22 |
| -5 | 8  | -12 | 0.27  | 0.70 |
| -5 | -8 | 12  | 0.26  | 0.26 |
| 5  | 8  | 12  | 0.40  | 0.45 |
| -6 | 8  | 12  | 0.27  | 0.44 |
| -6 | 8  | 12  | 0.84  | 0.39 |
| -6 | -8 | -12 | 0.49  | 0.42 |
| -6 | -8 | -12 | 0.42  | 0.28 |
| -6 | 8  | 12  | 0.26  | 0.38 |
| -6 | -8 | -12 | 0.47  | 0.56 |
| -6 | 8  | -12 | 0.74  | 0.40 |
| 6  | 8  | 12  | 0.48  | 0.42 |
| -6 | 8  | -12 | 1.26  | 0.69 |
| -7 | 8  | 12  | 1.28  | 0.25 |

## CIF S3

|    |    |     |      |      |
|----|----|-----|------|------|
| -7 | 8  | 12  | 1.73 | 0.37 |
| -7 | -8 | -12 | 0.49 | 0.37 |
| -7 | -8 | -12 | 0.88 | 0.39 |
| 7  | 8  | 12  | 2.02 | 0.46 |
| 0  | -9 | 12  | 1.41 | 0.70 |
| 0  | -9 | 12  | 1.55 | 0.66 |
| 0  | -9 | 12  | 2.15 | 0.68 |
| 0  | -9 | 12  | 3.79 | 1.10 |
| 0  | 9  | 12  | 2.86 | 0.65 |
| 0  | -9 | 12  | 1.77 | 0.83 |
| 0  | -9 | 12  | 2.05 | 0.68 |
| 0  | -9 | 12  | 2.78 | 0.85 |
| 0  | 9  | 12  | 3.06 | 0.91 |
| 0  | -9 | 12  | 1.80 | 0.66 |
| 0  | -9 | 12  | 2.13 | 0.62 |
| 0  | -9 | 12  | 1.89 | 0.50 |
| 1  | -9 | 12  | 4.19 | 1.13 |
| -1 | 9  | 12  | 2.53 | 0.61 |
| -1 | -9 | -12 | 4.00 | 1.10 |
| 1  | -9 | 12  | 1.80 | 0.85 |
| -1 | 9  | 12  | 3.49 | 0.96 |
| -1 | 9  | 12  | 3.26 | 0.85 |
| 1  | -9 | 12  | 1.74 | 0.76 |
| 1  | -9 | 12  | 2.32 | 0.61 |
| -1 | 9  | 12  | 4.25 | 1.10 |
| 1  | -9 | 12  | 3.53 | 0.75 |
| 1  | -9 | 12  | 2.51 | 0.71 |
| 1  | -9 | 12  | 1.82 | 0.61 |
| 1  | -9 | 12  | 1.05 | 0.70 |
| -1 | 9  | 12  | 3.01 | 0.87 |
| -1 | -9 | 12  | 3.86 | 1.06 |
| -1 | -9 | 12  | 1.46 | 0.70 |
| -1 | -9 | 12  | 3.87 | 0.79 |
| -1 | -9 | 12  | 1.90 | 0.75 |
| 1  | 9  | 12  | 2.20 | 0.56 |
| -1 | -9 | 12  | 0.91 | 0.72 |
| -1 | -9 | 12  | 2.75 | 0.65 |
| -1 | -9 | 12  | 5.43 | 1.12 |
| -1 | -9 | 12  | 2.10 | 0.66 |
| -1 | -9 | 12  | 1.91 | 0.55 |
| -2 | 9  | 12  | 1.30 | 0.71 |



## CIF S3

|    |    |     |       |      |
|----|----|-----|-------|------|
| 2  | -9 | 12  | 1.45  | 0.72 |
| -2 | -9 | -12 | 1.58  | 0.59 |
| 2  | -9 | 12  | 0.96  | 0.73 |
| -2 | 9  | 12  | 1.18  | 0.70 |
| 2  | -9 | 12  | 2.02  | 1.07 |
| 2  | -9 | 12  | 0.48  | 0.72 |
| -2 | 9  | 12  | 1.37  | 0.59 |
| 2  | -9 | 12  | 1.22  | 0.85 |
| -2 | 9  | 12  | 1.54  | 0.78 |
| 2  | -9 | 12  | 1.23  | 0.99 |
| 2  | -9 | 12  | 1.54  | 0.72 |
| 2  | -9 | 12  | 0.58  | 0.47 |
| 2  | 9  | 12  | 1.03  | 0.54 |
| -2 | -9 | 12  | 1.50  | 0.52 |
| -2 | -9 | 12  | 0.31  | 0.59 |
| -2 | -9 | 12  | 1.53  | 0.54 |
| -2 | -9 | 12  | 1.31  | 0.68 |
| 3  | -9 | 12  | 0.51  | 0.40 |
| 3  | -9 | 12  | 0.51  | 0.67 |
| 3  | -9 | 12  | 0.49  | 0.71 |
| -3 | 9  | 12  | 0.70  | 0.62 |
| 3  | -9 | 12  | 2.39  | 1.01 |
| -3 | 9  | 12  | 0.26  | 0.63 |
| -3 | 9  | 12  | 1.34  | 0.65 |
| 3  | -9 | 12  | -0.15 | 0.81 |
| -3 | 9  | 12  | 1.03  | 0.62 |
| 3  | -9 | 12  | 1.36  | 0.72 |
| -3 | 9  | 12  | 0.80  | 0.76 |
| -3 | -9 | 12  | 1.39  | 0.43 |
| -3 | -9 | 12  | 1.20  | 0.41 |
| -3 | -9 | 12  | 0.54  | 0.44 |
| 3  | 9  | 12  | 1.22  | 0.55 |
| -4 | 9  | 12  | 0.42  | 0.72 |
| -4 | 9  | 12  | 0.37  | 0.54 |
| -4 | -9 | -12 | 0.55  | 0.40 |
| -4 | 9  | 12  | 0.77  | 0.54 |
| -4 | 9  | 12  | 0.28  | 0.56 |
| 4  | -9 | 12  | -0.19 | 0.66 |
| -4 | 9  | 12  | 0.83  | 0.54 |
| -4 | 9  | 12  | -0.21 | 0.57 |
| -4 | -9 | -12 | -0.14 | 0.66 |

## CIF S3

|    |     |     |      |      |
|----|-----|-----|------|------|
| -4 | 9   | -12 | 0.80 | 0.72 |
| 4  | 9   | 12  | 0.89 | 0.52 |
| -4 | -9  | 12  | 0.59 | 0.34 |
| -5 | 9   | 12  | 1.63 | 0.45 |
| -5 | -9  | -12 | 4.11 | 0.80 |
| -5 | 9   | 12  | 4.07 | 0.78 |
| -5 | -9  | -12 | 2.50 | 0.64 |
| -5 | 9   | 12  | 1.11 | 0.50 |
| -5 | -9  | -12 | 2.03 | 0.98 |
| 5  | 9   | 12  | 1.73 | 0.47 |
| -5 | 9   | -12 | 2.30 | 0.67 |
| -5 | -9  | 12  | 2.55 | 0.33 |
| -5 | -9  | 12  | 2.75 | 0.33 |
| -5 | -9  | 12  | 2.83 | 0.28 |
| -6 | 9   | 12  | 2.16 | 0.60 |
| -6 | -9  | -12 | 3.13 | 0.71 |
| -6 | 9   | 12  | 3.49 | 0.46 |
| -6 | 9   | 12  | 3.60 | 0.54 |
| 6  | 9   | 12  | 3.49 | 0.59 |
| -6 | 9   | -12 | 4.17 | 0.52 |
| 0  | -10 | 12  | 5.90 | 1.24 |
| 0  | -10 | 12  | 6.44 | 1.11 |
| 0  | 10  | 12  | 6.47 | 1.17 |
| 0  | -10 | -12 | 5.58 | 1.16 |
| 0  | -10 | 12  | 6.73 | 0.85 |
| 0  | -10 | 12  | 3.98 | 0.88 |
| 0  | 10  | 12  | 5.01 | 0.99 |
| 0  | -10 | 12  | 5.70 | 0.93 |
| 0  | -10 | 12  | 5.70 | 0.88 |
| 0  | -10 | 12  | 7.08 | 0.98 |
| 0  | -10 | 12  | 5.65 | 0.85 |
| 1  | -10 | 12  | 0.47 | 0.49 |
| 1  | -10 | 12  | 0.71 | 0.63 |
| -1 | -10 | -12 | 0.66 | 0.58 |
| 1  | -10 | 12  | 0.02 | 0.59 |
| 1  | -10 | 12  | 1.16 | 0.96 |
| -1 | 10  | 12  | 0.63 | 0.38 |
| -1 | 10  | 12  | 0.60 | 0.74 |
| 1  | -10 | 12  | 0.79 | 0.77 |
| -1 | 10  | 12  | 1.39 | 0.60 |
| 1  | -10 | 12  | 0.70 | 0.65 |

## CIF S3

|    |     |     |       |      |
|----|-----|-----|-------|------|
| 1  | -10 | 12  | -0.29 | 0.64 |
| -1 | 10  | 12  | 1.29  | 0.65 |
| -1 | -10 | -12 | 0.22  | 0.77 |
| 1  | -10 | 12  | 0.49  | 0.56 |
| 1  | -10 | 12  | 0.78  | 0.67 |
| 1  | -10 | -12 | 1.06  | 0.67 |
| -1 | -10 | 12  | -0.14 | 0.63 |
| -1 | -10 | 12  | 1.02  | 0.54 |
| -1 | -10 | 12  | 0.70  | 0.58 |
| -1 | -10 | 12  | 1.35  | 1.02 |
| 1  | 10  | 12  | 1.02  | 0.59 |
| -1 | -10 | 12  | 1.09  | 0.76 |
| -1 | -10 | 12  | 1.33  | 0.55 |
| -1 | -10 | 12  | 0.67  | 0.53 |
| -2 | 10  | 12  | -0.66 | 0.75 |
| 2  | -10 | 12  | -0.06 | 0.43 |
| 2  | -10 | 12  | 0.45  | 0.68 |
| 2  | -10 | 12  | -1.22 | 0.92 |
| 2  | -10 | 12  | 0.34  | 0.61 |
| 2  | -10 | 12  | -0.28 | 0.58 |
| -2 | 10  | 12  | 0.75  | 0.54 |
| 2  | -10 | 12  | -0.04 | 0.69 |
| -2 | 10  | 12  | 0.92  | 0.64 |
| 2  | -10 | 12  | 0.66  | 0.65 |
| -2 | 10  | 12  | -0.35 | 0.68 |
| -2 | -10 | 12  | 0.78  | 0.47 |
| 2  | 10  | 12  | 0.50  | 0.51 |
| -2 | -10 | 12  | 0.24  | 0.48 |
| -2 | -10 | 12  | 0.52  | 0.57 |
| 2  | -10 | -12 | 1.01  | 0.67 |
| -2 | -10 | 12  | 0.28  | 0.75 |
| 3  | -10 | 12  | 2.17  | 0.67 |
| 3  | -10 | 12  | 3.28  | 0.67 |
| 3  | -10 | 12  | 2.73  | 0.94 |
| -3 | 10  | 12  | 1.66  | 0.62 |
| -3 | 10  | 12  | 2.08  | 0.75 |
| 3  | -10 | 12  | 2.09  | 0.70 |
| 3  | -10 | 12  | 1.20  | 0.98 |
| -3 | 10  | 12  | 3.41  | 0.94 |
| -3 | -10 | -12 | 1.53  | 0.51 |
| -3 | 10  | 12  | 1.52  | 0.60 |

## CIF S3

|    |     |     |      |      |
|----|-----|-----|------|------|
| -3 | -10 | 12  | 2.88 | 0.63 |
| 3  | -10 | -12 | 5.26 | 1.22 |
| -3 | -10 | 12  | 1.95 | 0.55 |
| 3  | 10  | 12  | 1.53 | 0.52 |
| -3 | -10 | 12  | 3.43 | 0.63 |
| 4  | -10 | 12  | 1.81 | 0.67 |
| -4 | 10  | 12  | 1.73 | 0.68 |
| -4 | -10 | -12 | 1.13 | 0.75 |
| -4 | 10  | 12  | 1.34 | 0.52 |
| -4 | 10  | 12  | 1.61 | 0.52 |
| -4 | 10  | 12  | 1.42 | 0.49 |
| -4 | 10  | 12  | 1.86 | 0.55 |
| -4 | 10  | -12 | 0.95 | 0.57 |
| 4  | 10  | 12  | 1.30 | 0.44 |
| 4  | -10 | -12 | 3.92 | 1.28 |
| -4 | -10 | 12  | 2.63 | 0.47 |
| 0  | 11  | 12  | 2.38 | 0.58 |
| 0  | -11 | 12  | 0.83 | 0.71 |
| 0  | -11 | 12  | 1.06 | 0.49 |
| 0  | -11 | 12  | 1.17 | 0.51 |
| 0  | -11 | -12 | 0.39 | 0.73 |
| 0  | -11 | 12  | 0.93 | 0.55 |
| 0  | -11 | 12  | 1.36 | 0.52 |
| 0  | -11 | 12  | 1.82 | 0.52 |
| 0  | -11 | -12 | 1.59 | 0.54 |
| 0  | 11  | 12  | 0.38 | 0.76 |
| 0  | -11 | 12  | 2.09 | 0.61 |
| 0  | -11 | 12  | 2.12 | 0.94 |
| 0  | 11  | 12  | 2.60 | 0.58 |
| 1  | -11 | 12  | 7.30 | 0.85 |
| -1 | 11  | 12  | 6.01 | 0.52 |
| 1  | -11 | 12  | 4.96 | 0.86 |
| 1  | -11 | 12  | 5.48 | 1.30 |
| 1  | -11 | 12  | 4.64 | 1.12 |
| -1 | 11  | 12  | 5.06 | 0.87 |
| -1 | -11 | -12 | 5.08 | 0.98 |
| 1  | -11 | 12  | 6.34 | 0.85 |
| 1  | -11 | 12  | 6.63 | 0.66 |
| 1  | -11 | 12  | 5.58 | 0.82 |
| -1 | 11  | 12  | 4.45 | 1.06 |
| 1  | -11 | 12  | 5.91 | 1.24 |

## CIF S3

|    |     |     |       |      |
|----|-----|-----|-------|------|
| -1 | 11  | 12  | 4.78  | 0.87 |
| -1 | -11 | 12  | 7.28  | 0.88 |
| -1 | -11 | 12  | 5.46  | 0.81 |
| -1 | -11 | 12  | 6.54  | 0.70 |
| -1 | -11 | 12  | 6.54  | 0.81 |
| -1 | -11 | 12  | 5.58  | 1.08 |
| 1  | -11 | -12 | 6.49  | 1.01 |
| 1  | 11  | 12  | 6.42  | 0.94 |
| -2 | 11  | 12  | 1.14  | 0.70 |
| 2  | -11 | 12  | 0.76  | 0.67 |
| -2 | 11  | 12  | 0.49  | 0.76 |
| 2  | -11 | 12  | 0.86  | 0.55 |
| -2 | 11  | 12  | 0.50  | 0.63 |
| 2  | -11 | 12  | 0.32  | 0.35 |
| 2  | -11 | 12  | 1.21  | 0.49 |
| 2  | -11 | 12  | 0.38  | 0.91 |
| -2 | -11 | -12 | 1.04  | 0.64 |
| 2  | -11 | 12  | 0.77  | 0.53 |
| -2 | 11  | 12  | 0.52  | 0.54 |
| 2  | 11  | 12  | 0.66  | 0.51 |
| 2  | -11 | -12 | 0.82  | 0.64 |
| -2 | -11 | 12  | 1.26  | 0.47 |
| -2 | -11 | 12  | 0.80  | 0.44 |
| 2  | -11 | -12 | 1.17  | 0.53 |
| -2 | -11 | 12  | 1.28  | 0.41 |
| -3 | -11 | -12 | 5.63  | 0.65 |
| 3  | -11 | 12  | 7.76  | 0.93 |
| 3  | -11 | 12  | 7.34  | 0.87 |
| -3 | 11  | 12  | 8.23  | 0.90 |
| -3 | 11  | 12  | 7.11  | 1.05 |
| 3  | -11 | 12  | 7.43  | 0.80 |
| -3 | 11  | 12  | 7.31  | 0.87 |
| 3  | 11  | 12  | 9.30  | 0.84 |
| -3 | -11 | 12  | 8.14  | 0.66 |
| -3 | 11  | -12 | 7.04  | 0.97 |
| -3 | -11 | 12  | 7.92  | 0.69 |
| -3 | -11 | 12  | 8.34  | 0.59 |
| 3  | -11 | -12 | 10.04 | 1.03 |
| -4 | 11  | 12  | 0.19  | 0.32 |
| -4 | 11  | 12  | -0.40 | 0.53 |
| -4 | 11  | 12  | 0.64  | 0.48 |

## CIF S3

|    |     |     |       |      |
|----|-----|-----|-------|------|
| -4 | 11  | 12  | -0.04 | 0.39 |
| -4 | 11  | 12  | -0.06 | 0.39 |
| -4 | 11  | 12  | -0.03 | 0.38 |
| -4 | 11  | 12  | -0.23 | 0.35 |
| 4  | -11 | 12  | 0.01  | 0.52 |
| -4 | -11 | -12 | 0.03  | 0.54 |
| 4  | -11 | -12 | 0.27  | 0.55 |
| -4 | -11 | 12  | -0.17 | 0.24 |
| 4  | 11  | 12  | -0.07 | 0.40 |
| -4 | -11 | 12  | 0.09  | 0.25 |
| 0  | 12  | 12  | 0.21  | 0.47 |
| 0  | -12 | 12  | 0.39  | 0.77 |
| 0  | -12 | 12  | 0.01  | 0.41 |
| 0  | -12 | 12  | 0.26  | 0.38 |
| 0  | 12  | 12  | 0.64  | 0.33 |
| 0  | -12 | 12  | 0.80  | 0.50 |
| 0  | -12 | 12  | 0.73  | 0.42 |
| 0  | -12 | 12  | 0.10  | 0.48 |
| 0  | 12  | 12  | 0.25  | 0.60 |
| 1  | -12 | 12  | 2.02  | 0.54 |
| 1  | -12 | 12  | 0.75  | 0.43 |
| -1 | 12  | 12  | 2.36  | 0.69 |
| 1  | -12 | 12  | 2.12  | 0.80 |
| -1 | -12 | -12 | 1.06  | 0.66 |
| 1  | -12 | 12  | 1.99  | 0.91 |
| 1  | -12 | 12  | 1.44  | 0.49 |
| -1 | 12  | 12  | 1.74  | 0.50 |
| 1  | -12 | 12  | 1.73  | 0.47 |
| 1  | 12  | 12  | 1.26  | 0.40 |
| -1 | -12 | 12  | 2.06  | 0.43 |
| 1  | 12  | 12  | 1.78  | 0.47 |
| -1 | -12 | 12  | 1.42  | 0.42 |
| 1  | -12 | -12 | 1.62  | 0.41 |
| -1 | -12 | 12  | 2.23  | 1.09 |
| -2 | 12  | 12  | 2.59  | 0.65 |
| -2 | 12  | 12  | 0.68  | 0.48 |
| -2 | 12  | 12  | 1.05  | 0.64 |
| 2  | -12 | 12  | 2.58  | 0.67 |
| 2  | -12 | 12  | 1.20  | 0.46 |
| -2 | -12 | 12  | 1.17  | 0.35 |
| 2  | -12 | -12 | 1.35  | 0.52 |

## CIF S3

|    |     |     |       |      |
|----|-----|-----|-------|------|
| 2  | 12  | 12  | 1.24  | 0.42 |
| -2 | -12 | 12  | 2.32  | 0.58 |
| -3 | 12  | 12  | 2.83  | 0.68 |
| -3 | 12  | 12  | 3.95  | 0.62 |
| -3 | 12  | 12  | 3.68  | 0.59 |
| 3  | -12 | 12  | 3.45  | 0.65 |
| 3  | -12 | 12  | 3.84  | 0.65 |
| 3  | -12 | -12 | 2.84  | 0.64 |
| -3 | -12 | 12  | 3.22  | 0.43 |
| -3 | -12 | 12  | 3.57  | 0.55 |
| 3  | 12  | 12  | 3.62  | 0.60 |
| 0  | 0   | 13  | -0.22 | 0.55 |
| 0  | 0   | -13 | 0.17  | 0.80 |
| 0  | 0   | 13  | -0.11 | 0.41 |
| 0  | 0   | 13  | 0.51  | 0.64 |
| 0  | 0   | -13 | 0.84  | 0.93 |
| -1 | 0   | -13 | 3.12  | 0.97 |
| -1 | 0   | 13  | 3.52  | 0.63 |
| 1  | 0   | 13  | 3.44  | 0.68 |
| 1  | 0   | -13 | 2.73  | 1.00 |
| -1 | 0   | 13  | 3.33  | 0.81 |
| 1  | 0   | 13  | 4.27  | 0.82 |
| 1  | 0   | -13 | 3.07  | 0.91 |
| -1 | 0   | 13  | 3.85  | 0.66 |
| 2  | 0   | 13  | 82.55 | 4.51 |
| -2 | 0   | 13  | 90.77 | 4.52 |
| 2  | 0   | -13 | 94.43 | 4.86 |
| 2  | 0   | 13  | 90.94 | 4.55 |
| -2 | 0   | 13  | 88.16 | 4.43 |
| -2 | 0   | 13  | 87.70 | 4.55 |
| 3  | 0   | -13 | 33.41 | 2.06 |
| -3 | 0   | -13 | 30.39 | 2.11 |
| -3 | 0   | 13  | 31.77 | 1.80 |
| 3  | 0   | -13 | 33.64 | 2.23 |
| -3 | 0   | 13  | 32.29 | 1.92 |
| 3  | 0   | 13  | 34.50 | 1.92 |
| -3 | 0   | 13  | 33.13 | 1.84 |
| -4 | 0   | 13  | 1.66  | 0.43 |
| 4  | 0   | 13  | 1.57  | 0.61 |
| -4 | 0   | 13  | 2.99  | 0.80 |
| -4 | 0   | -13 | 2.73  | 0.94 |

## CIF S3

|    |    |     |       |      |
|----|----|-----|-------|------|
| -4 | 0  | 13  | 2.68  | 0.50 |
| -5 | 0  | 13  | 15.11 | 0.97 |
| -5 | 0  | -13 | 15.34 | 1.67 |
| -5 | 0  | -13 | 18.02 | 1.85 |
| 5  | 0  | 13  | 16.29 | 1.26 |
| -5 | 0  | 13  | 15.56 | 1.36 |
| -5 | 0  | 13  | 14.38 | 0.81 |
| 5  | 0  | 13  | 15.12 | 1.10 |
| -5 | 0  | -13 | 16.03 | 1.48 |
| -5 | 0  | 13  | 14.52 | 0.87 |
| 6  | 0  | 13  | 15.97 | 1.18 |
| -6 | 0  | 13  | 17.60 | 0.92 |
| -6 | 0  | 13  | 17.60 | 1.36 |
| -6 | 0  | -13 | 15.21 | 1.61 |
| -6 | 0  | 13  | 17.71 | 0.93 |
| -6 | 0  | -13 | 14.97 | 1.74 |
| -6 | 0  | -13 | 16.20 | 1.22 |
| -6 | 0  | 13  | 17.94 | 0.93 |
| -7 | 0  | -13 | 1.93  | 0.57 |
| -7 | 0  | -13 | 1.59  | 1.07 |
| -7 | 0  | -13 | 4.05  | 1.19 |
| 7  | 0  | 13  | 2.45  | 0.68 |
| -7 | 0  | -13 | 3.22  | 0.77 |
| -8 | 0  | -13 | 2.61  | 0.61 |
| -8 | 0  | -13 | 2.06  | 0.64 |
| -8 | 0  | -13 | 2.67  | 0.80 |
| -8 | 0  | -13 | 1.86  | 0.42 |
| 8  | 0  | 13  | 2.57  | 0.50 |
| 0  | 1  | -13 | 7.37  | 1.25 |
| 0  | -1 | 13  | 5.80  | 0.92 |
| 0  | -1 | -13 | 5.63  | 1.36 |
| 0  | 1  | -13 | 5.98  | 1.12 |
| 0  | 1  | 13  | 5.12  | 0.78 |
| 0  | -1 | -13 | 5.99  | 1.17 |
| 0  | 1  | 13  | 5.73  | 0.89 |
| 0  | -1 | 13  | 7.49  | 0.78 |
| 0  | 1  | 13  | 5.94  | 0.64 |
| 0  | -1 | 13  | 5.75  | 0.92 |
| 1  | -1 | 13  | 3.93  | 0.69 |
| -1 | 1  | 13  | 5.63  | 0.83 |
| 1  | 1  | -13 | 4.78  | 1.15 |



## CIF S3

|    |    |     |      |      |
|----|----|-----|------|------|
| -1 | -1 | -13 | 3.63 | 1.04 |
| 1  | 1  | -13 | 5.34 | 0.99 |
| 1  | -1 | 13  | 4.00 | 0.64 |
| -1 | 1  | 13  | 3.64 | 0.69 |
| -1 | 1  | -13 | 4.35 | 1.13 |
| -1 | -1 | 13  | 4.41 | 0.72 |
| -1 | -1 | 13  | 5.20 | 0.84 |
| 1  | 1  | 13  | 4.87 | 0.66 |
| 1  | -1 | -13 | 3.92 | 1.20 |
| 1  | 1  | 13  | 3.61 | 0.75 |
| -1 | -1 | 13  | 3.82 | 0.75 |
| 1  | -1 | -13 | 5.43 | 1.09 |
| 2  | 1  | -13 | 1.51 | 0.94 |
| 2  | -1 | 13  | 1.99 | 0.55 |
| -2 | 1  | 13  | 1.70 | 0.57 |
| 2  | -1 | 13  | 1.96 | 0.62 |
| -2 | 1  | 13  | 4.18 | 0.76 |
| -2 | 1  | 13  | 2.50 | 0.44 |
| 2  | 1  | -13 | 3.43 | 0.84 |
| -2 | -1 | 13  | 2.63 | 0.70 |
| -2 | -1 | 13  | 2.61 | 0.47 |
| 2  | -1 | -13 | 3.69 | 1.09 |
| 2  | 1  | 13  | 3.45 | 0.62 |
| 2  | 1  | 13  | 2.26 | 0.63 |
| 2  | -1 | -13 | 2.44 | 1.12 |
| -2 | -1 | 13  | 3.04 | 0.62 |
| -3 | 1  | 13  | 4.91 | 0.97 |
| 3  | 1  | -13 | 5.10 | 1.03 |
| 3  | 1  | -13 | 3.94 | 0.92 |
| -3 | 1  | 13  | 5.06 | 0.81 |
| 3  | -1 | 13  | 4.79 | 0.76 |
| -3 | -1 | -13 | 4.35 | 1.17 |
| -3 | 1  | -13 | 4.07 | 1.06 |
| -3 | -1 | 13  | 5.68 | 0.78 |
| -3 | -1 | 13  | 4.84 | 0.44 |
| 3  | 1  | 13  | 4.56 | 0.82 |
| 3  | -1 | -13 | 4.51 | 1.25 |
| -3 | -1 | 13  | 3.75 | 1.00 |
| 3  | -1 | -13 | 5.05 | 1.13 |
| -3 | -1 | 13  | 3.83 | 0.63 |
| -3 | -1 | 13  | 3.96 | 0.37 |

## CIF S3

|    |    |     |       |      |
|----|----|-----|-------|------|
| -4 | -1 | -13 | 14.17 | 1.48 |
| 4  | -1 | 13  | 12.77 | 1.15 |
| -4 | 1  | 13  | 13.21 | 1.24 |
| -4 | 1  | 13  | 13.51 | 1.01 |
| -4 | 1  | 13  | 11.32 | 0.91 |
| 4  | 1  | 13  | 12.82 | 1.12 |
| -4 | -1 | 13  | 12.11 | 1.18 |
| -4 | 1  | -13 | 15.04 | 1.46 |
| -4 | -1 | 13  | 12.89 | 0.93 |
| -4 | -1 | 13  | 13.81 | 0.90 |
| 4  | -1 | -13 | 9.75  | 1.34 |
| -4 | 1  | -13 | 11.85 | 1.29 |
| -5 | 1  | 13  | 12.65 | 1.28 |
| 5  | -1 | 13  | 13.32 | 1.16 |
| -5 | -1 | -13 | 12.49 | 1.72 |
| -5 | 1  | 13  | 11.23 | 0.77 |
| -5 | -1 | -13 | 12.96 | 1.35 |
| 5  | -1 | 13  | 13.03 | 0.97 |
| -5 | 1  | 13  | 12.07 | 0.76 |
| -5 | 1  | 13  | 12.34 | 0.88 |
| -5 | 1  | 13  | 11.15 | 0.84 |
| -5 | -1 | 13  | 11.47 | 0.73 |
| -5 | 1  | -13 | 12.48 | 1.66 |
| 5  | 1  | 13  | 9.72  | 1.03 |
| -5 | -1 | 13  | 11.97 | 0.75 |
| -5 | -1 | 13  | 12.81 | 1.25 |
| -5 | 1  | -13 | 10.32 | 1.35 |
| 5  | 1  | 13  | 12.27 | 1.00 |
| -5 | 1  | -13 | 12.25 | 1.38 |
| -5 | -1 | 13  | 11.41 | 0.80 |
| -6 | -1 | -13 | 12.16 | 1.13 |
| -6 | -1 | -13 | 8.74  | 1.04 |
| 6  | -1 | 13  | 10.14 | 0.91 |
| -6 | -1 | -13 | 9.15  | 1.42 |
| -6 | 1  | 13  | 9.34  | 0.64 |
| -6 | -1 | -13 | 8.24  | 1.50 |
| -6 | 1  | 13  | 9.44  | 0.65 |
| -6 | -1 | 13  | 10.34 | 1.19 |
| -6 | 1  | -13 | 8.80  | 1.62 |
| -6 | -1 | 13  | 10.08 | 0.56 |
| -6 | 1  | -13 | 10.69 | 1.43 |

## CIF S3

|    |    |     |       |      |
|----|----|-----|-------|------|
| -6 | -1 | 13  | 9.92  | 0.55 |
| 6  | 1  | 13  | 9.79  | 0.93 |
| -7 | -1 | -13 | 1.27  | 0.50 |
| 7  | -1 | 13  | 2.02  | 0.41 |
| -7 | -1 | -13 | 1.37  | 0.74 |
| -7 | -1 | -13 | 0.43  | 0.97 |
| -7 | -1 | -13 | 1.53  | 0.57 |
| 7  | 1  | 13  | 2.16  | 0.67 |
| -7 | 1  | -13 | 1.57  | 0.55 |
| -7 | 1  | -13 | 2.00  | 0.35 |
| -7 | 1  | -13 | 1.05  | 0.83 |
| -7 | 1  | -13 | 1.35  | 0.51 |
| -7 | 1  | -13 | 1.57  | 0.97 |
| -8 | -1 | -13 | -0.01 | 0.61 |
| -8 | -1 | -13 | -1.01 | 0.77 |
| 8  | -1 | 13  | 0.24  | 0.23 |
| -8 | -1 | -13 | 0.12  | 0.40 |
| -8 | -1 | -13 | 0.14  | 0.37 |
| -8 | 1  | -13 | -0.27 | 0.39 |
| -8 | 1  | -13 | 0.23  | 0.64 |
| -8 | 1  | -13 | 1.41  | 0.74 |
| 8  | 1  | 13  | 0.39  | 0.29 |
| 0  | -2 | 13  | 0.83  | 0.50 |
| 0  | -2 | 13  | 1.59  | 0.50 |
| 0  | -2 | -13 | 1.45  | 1.19 |
| 0  | -2 | -13 | 0.29  | 0.91 |
| 0  | 2  | 13  | 0.66  | 0.46 |
| 0  | 2  | -13 | -0.82 | 0.85 |
| 0  | 2  | -13 | 0.62  | 0.82 |
| 0  | -2 | 13  | 0.69  | 0.63 |
| 0  | 2  | 13  | 0.42  | 0.45 |
| 1  | 2  | -13 | 10.92 | 1.32 |
| 1  | -2 | 13  | 11.85 | 0.94 |
| -1 | 2  | 13  | 9.96  | 0.83 |
| -1 | 2  | 13  | 12.01 | 1.06 |
| 1  | 2  | -13 | 9.37  | 1.19 |
| -1 | -2 | -13 | 13.55 | 1.43 |
| 1  | -2 | 13  | 10.20 | 0.99 |
| -1 | -2 | 13  | 12.24 | 0.94 |
| -1 | -2 | 13  | 12.34 | 1.03 |
| -1 | -2 | 13  | 10.62 | 0.96 |

## CIF S3

|    |    |     |       |      |
|----|----|-----|-------|------|
| 1  | 2  | 13  | 12.56 | 0.92 |
| 1  | -2 | -13 | 8.90  | 1.31 |
| -1 | 2  | -13 | 13.22 | 1.35 |
| -1 | 2  | -13 | 10.10 | 1.78 |
| 1  | 2  | 13  | 11.44 | 0.92 |
| 1  | -2 | -13 | 10.50 | 1.43 |
| 2  | 2  | -13 | 10.18 | 1.16 |
| 2  | -2 | 13  | 12.70 | 1.00 |
| 2  | -2 | 13  | 9.62  | 0.97 |
| 2  | 2  | -13 | 8.94  | 1.27 |
| -2 | 2  | 13  | 12.24 | 1.10 |
| -2 | 2  | 13  | 11.86 | 0.85 |
| -2 | 2  | 13  | 10.85 | 1.02 |
| 2  | -2 | -13 | 10.46 | 1.37 |
| 2  | 2  | 13  | 10.68 | 1.01 |
| -2 | -2 | 13  | 12.79 | 0.82 |
| -2 | -2 | 13  | 9.38  | 0.96 |
| 2  | -2 | -13 | 10.63 | 1.52 |
| -2 | -2 | 13  | 11.53 | 0.85 |
| -2 | -2 | 13  | 10.29 | 1.04 |
| -3 | 2  | 13  | 1.05  | 0.42 |
| 3  | 2  | -13 | 0.01  | 0.64 |
| -3 | 2  | 13  | 2.70  | 0.63 |
| -3 | 2  | 13  | 3.04  | 0.80 |
| -3 | -2 | -13 | 0.09  | 0.83 |
| 3  | -2 | 13  | 2.81  | 0.66 |
| 3  | 2  | -13 | 3.03  | 0.91 |
| 3  | 2  | 13  | 2.33  | 0.64 |
| -3 | -2 | 13  | 3.51  | 0.58 |
| -3 | -2 | 13  | 2.34  | 0.47 |
| 3  | -2 | -13 | 0.36  | 1.21 |
| -3 | -2 | 13  | 3.62  | 0.79 |
| 3  | -2 | -13 | 2.35  | 1.04 |
| -4 | 2  | 13  | 13.33 | 1.22 |
| -4 | 2  | 13  | 13.78 | 1.08 |
| 4  | -2 | 13  | 13.42 | 1.18 |
| -4 | -2 | -13 | 14.29 | 1.50 |
| -4 | 2  | 13  | 14.40 | 1.21 |
| -4 | -2 | 13  | 13.60 | 0.90 |
| 4  | -2 | -13 | 13.27 | 1.79 |
| -4 | -2 | 13  | 14.05 | 0.97 |

## CIF S3

|    |    |     |       |      |
|----|----|-----|-------|------|
| -4 | 2  | -13 | 11.13 | 2.29 |
| -4 | -2 | 13  | 13.53 | 1.19 |
| -4 | 2  | -13 | 13.75 | 1.48 |
| 4  | 2  | 13  | 10.88 | 1.06 |
| -5 | 2  | 13  | 4.67  | 0.58 |
| -5 | 2  | 13  | 4.15  | 0.62 |
| -5 | 2  | 13  | 4.82  | 0.69 |
| -5 | 2  | 13  | 5.14  | 0.71 |
| -5 | -2 | -13 | 5.49  | 1.13 |
| 5  | -2 | 13  | 4.45  | 0.92 |
| -5 | 2  | 13  | 4.99  | 0.54 |
| 5  | -2 | 13  | 5.17  | 0.73 |
| -5 | -2 | -13 | 3.11  | 1.11 |
| -5 | -2 | 13  | 4.57  | 0.46 |
| -5 | 2  | -13 | 4.49  | 1.15 |
| 5  | 2  | 13  | 4.68  | 0.88 |
| 5  | 2  | 13  | 4.04  | 0.78 |
| -5 | 2  | -13 | 5.78  | 1.37 |
| -5 | -2 | 13  | 5.32  | 0.53 |
| -5 | -2 | 13  | 4.84  | 0.48 |
| -5 | -2 | 13  | 4.08  | 1.06 |
| -5 | 2  | -13 | 6.56  | 1.40 |
| -6 | 2  | 13  | 19.06 | 1.05 |
| -6 | -2 | -13 | 18.56 | 1.31 |
| -6 | -2 | -13 | 16.80 | 1.33 |
| -6 | 2  | 13  | 18.38 | 1.03 |
| 6  | -2 | 13  | 18.79 | 1.18 |
| -6 | -2 | -13 | 18.76 | 1.69 |
| -6 | -2 | 13  | 18.05 | 1.42 |
| -6 | 2  | -13 | 17.48 | 1.68 |
| 6  | 2  | 13  | 18.44 | 1.23 |
| -6 | 2  | -13 | 16.84 | 1.77 |
| -7 | -2 | -13 | 7.66  | 1.63 |
| -7 | 2  | 13  | 9.04  | 0.53 |
| -7 | -2 | -13 | 9.34  | 1.39 |
| -7 | -2 | -13 | 10.47 | 0.95 |
| 7  | -2 | 13  | 8.85  | 0.78 |
| -7 | -2 | -13 | 10.07 | 0.94 |
| -7 | 2  | 13  | 8.72  | 0.53 |
| -7 | 2  | -13 | 9.08  | 0.88 |
| -7 | 2  | -13 | 9.55  | 0.74 |

## CIF S3

|    |    |     |       |      |
|----|----|-----|-------|------|
| -7 | 2  | -13 | 10.57 | 1.33 |
| -7 | 2  | -13 | 8.12  | 1.40 |
| -7 | 2  | -13 | 9.92  | 0.92 |
| 7  | 2  | 13  | 9.59  | 0.82 |
| -8 | -2 | -13 | 0.97  | 0.78 |
| -8 | -2 | -13 | -0.02 | 0.38 |
| -8 | -2 | -13 | 0.31  | 0.55 |
| 8  | 2  | 13  | -0.05 | 0.28 |
| -8 | 2  | -13 | 0.51  | 0.42 |
| -8 | 2  | -13 | 0.15  | 0.67 |
| -8 | 2  | -13 | -0.09 | 0.62 |
| 0  | 3  | 13  | 0.76  | 0.47 |
| 0  | -3 | -13 | 0.90  | 1.15 |
| 0  | 3  | -13 | 2.12  | 0.97 |
| 0  | 3  | -13 | 0.42  | 0.77 |
| 0  | 3  | 13  | 1.02  | 0.51 |
| 0  | -3 | 13  | 1.01  | 0.53 |
| 0  | -3 | 13  | 0.29  | 0.65 |
| 0  | -3 | 13  | 1.10  | 0.55 |
| 1  | 3  | -13 | 13.49 | 1.23 |
| -1 | 3  | 13  | 13.07 | 0.95 |
| 1  | 3  | -13 | 12.92 | 1.38 |
| -1 | 3  | 13  | 14.75 | 1.19 |
| 1  | -3 | 13  | 15.20 | 1.02 |
| 1  | -3 | 13  | 11.39 | 1.01 |
| 1  | 3  | 13  | 12.94 | 1.01 |
| -1 | -3 | 13  | 12.29 | 1.02 |
| -1 | -3 | 13  | 14.00 | 1.17 |
| -1 | 3  | -13 | 12.77 | 1.35 |
| -1 | -3 | 13  | 14.71 | 0.93 |
| 1  | 3  | 13  | 12.81 | 1.09 |
| 1  | -3 | -13 | 11.26 | 1.54 |
| -1 | 3  | -13 | 11.72 | 1.61 |
| 1  | -3 | -13 | 11.78 | 1.37 |
| 2  | 3  | -13 | 12.13 | 1.21 |
| -2 | 3  | 13  | 13.43 | 1.11 |
| 2  | -3 | 13  | 10.16 | 1.04 |
| 2  | 3  | -13 | 13.55 | 1.31 |
| 2  | -3 | 13  | 12.78 | 1.09 |
| -2 | 3  | 13  | 13.62 | 0.94 |
| -2 | -3 | 13  | 12.79 | 1.09 |

## CIF S3

|    |    |     |       |      |
|----|----|-----|-------|------|
| 2  | -3 | -13 | 10.78 | 1.44 |
| -2 | -3 | 13  | 12.18 | 0.92 |
| 2  | -3 | -13 | 11.77 | 1.61 |
| -2 | -3 | 13  | 13.27 | 1.04 |
| -2 | -3 | 13  | 13.07 | 0.85 |
| 2  | 3  | 13  | 13.25 | 1.09 |
| -3 | 3  | 13  | 7.55  | 1.03 |
| 3  | 3  | -13 | 7.40  | 0.97 |
| -3 | -3 | -13 | 6.72  | 1.35 |
| -3 | 3  | 13  | 6.47  | 0.75 |
| -3 | 3  | 13  | 7.44  | 0.94 |
| 3  | -3 | 13  | 7.00  | 0.90 |
| -3 | -3 | 13  | 6.83  | 0.93 |
| -3 | -3 | 13  | 6.14  | 0.70 |
| 3  | -3 | -13 | 5.81  | 1.36 |
| 3  | 3  | 13  | 7.58  | 0.86 |
| -3 | -3 | 13  | 5.86  | 0.83 |
| 4  | -3 | 13  | 8.77  | 0.98 |
| -4 | 3  | 13  | 7.67  | 0.93 |
| -4 | -3 | -13 | 6.36  | 1.25 |
| -4 | -3 | 13  | 8.07  | 0.70 |
| -4 | -3 | 13  | 8.06  | 0.77 |
| 4  | 3  | 13  | 6.39  | 0.89 |
| -4 | 3  | -13 | 8.00  | 1.29 |
| -4 | -3 | 13  | 7.43  | 1.12 |
| 5  | -3 | 13  | 0.11  | 0.58 |
| -5 | -3 | -13 | 3.56  | 1.17 |
| -5 | -3 | -13 | 0.31  | 0.92 |
| -5 | 3  | 13  | 1.14  | 0.44 |
| -5 | 3  | 13  | 0.63  | 0.51 |
| -5 | 3  | 13  | 1.24  | 0.39 |
| -5 | 3  | 13  | 0.72  | 0.36 |
| -5 | 3  | 13  | 1.14  | 0.67 |
| -5 | 3  | 13  | 1.54  | 0.39 |
| -5 | 3  | -13 | 1.65  | 0.88 |
| -5 | -3 | 13  | 1.44  | 0.24 |
| -5 | 3  | -13 | 1.83  | 0.96 |
| -5 | -3 | 13  | 1.44  | 0.37 |
| -5 | 3  | -13 | 1.73  | 0.93 |
| -5 | -3 | 13  | 2.36  | 0.88 |
| 5  | 3  | 13  | 0.93  | 0.45 |

## CIF S3

|    |    |     |       |      |
|----|----|-----|-------|------|
| -6 | -3 | -13 | 3.06  | 0.74 |
| -6 | -3 | -13 | 3.32  | 0.90 |
| -6 | -3 | -13 | 4.57  | 0.93 |
| -6 | -3 | -13 | 2.27  | 1.11 |
| -6 | 3  | 13  | 3.16  | 0.36 |
| -6 | 3  | 13  | 3.10  | 0.53 |
| -6 | 3  | -13 | 3.23  | 0.96 |
| -6 | 3  | -13 | 3.34  | 0.95 |
| -6 | -3 | 13  | 2.70  | 0.83 |
| 6  | 3  | 13  | 3.26  | 0.75 |
| -7 | 3  | 13  | 2.88  | 0.38 |
| -7 | -3 | -13 | 3.24  | 0.58 |
| -7 | 3  | 13  | 2.66  | 0.38 |
| -7 | 3  | 13  | 2.25  | 0.38 |
| -7 | -3 | -13 | 3.85  | 0.92 |
| -7 | -3 | -13 | 3.53  | 0.82 |
| 7  | -3 | 13  | 1.77  | 0.64 |
| -7 | -3 | -13 | 1.01  | 0.58 |
| -7 | 3  | -13 | 2.23  | 0.55 |
| -7 | 3  | -13 | 3.00  | 0.75 |
| -7 | 3  | -13 | 2.51  | 0.92 |
| -7 | 3  | -13 | 4.16  | 1.19 |
| -7 | 3  | -13 | 2.16  | 0.82 |
| 7  | 3  | 13  | 2.69  | 0.68 |
| -8 | -3 | -13 | 3.38  | 0.63 |
| -8 | -3 | -13 | 3.55  | 0.63 |
| -8 | -3 | -13 | 2.27  | 0.71 |
| 8  | 3  | 13  | 3.42  | 0.51 |
| -8 | 3  | -13 | 3.43  | 0.59 |
| -8 | 3  | -13 | 2.99  | 0.65 |
| 8  | 3  | 13  | 3.41  | 0.54 |
| 0  | 4  | -13 | 5.77  | 1.13 |
| 0  | 4  | -13 | 5.68  | 1.03 |
| 0  | 4  | 13  | 4.93  | 0.83 |
| 0  | -4 | -13 | 6.10  | 1.38 |
| 0  | -4 | 13  | 4.85  | 0.98 |
| 0  | -4 | 13  | 3.73  | 0.69 |
| 0  | -4 | 13  | 5.24  | 0.73 |
| 0  | 4  | 13  | 4.18  | 0.72 |
| -1 | 4  | 13  | 12.21 | 0.98 |
| 1  | -4 | 13  | 12.87 | 1.00 |



## CIF S3

|    |    |     |       |      |
|----|----|-----|-------|------|
| 1  | -4 | 13  | 11.47 | 0.96 |
| 1  | 4  | -13 | 12.01 | 1.38 |
| 1  | 4  | -13 | 13.05 | 1.22 |
| 1  | -4 | 13  | 12.79 | 0.98 |
| -1 | 4  | 13  | 14.84 | 1.24 |
| -1 | 4  | 13  | 12.24 | 1.07 |
| 1  | -4 | -13 | 8.79  | 1.69 |
| -1 | -4 | 13  | 12.33 | 1.00 |
| 1  | -4 | -13 | 14.61 | 1.57 |
| 1  | 4  | 13  | 12.26 | 1.08 |
| -1 | 4  | -13 | 10.08 | 1.22 |
| -1 | -4 | 13  | 13.62 | 1.10 |
| 1  | 4  | 13  | 13.12 | 0.99 |
| -1 | -4 | 13  | 11.13 | 0.95 |
| 2  | 4  | -13 | 12.54 | 1.19 |
| 2  | -4 | 13  | 13.50 | 1.06 |
| 2  | -4 | 13  | 12.40 | 1.05 |
| -2 | -4 | -13 | 12.41 | 1.40 |
| -2 | 4  | 13  | 11.96 | 1.16 |
| -2 | 4  | 13  | 12.81 | 0.99 |
| 2  | 4  | 13  | 13.30 | 1.13 |
| 2  | -4 | -13 | 5.58  | 2.64 |
| 2  | -4 | -13 | 8.34  | 1.53 |
| -2 | -4 | 13  | 13.90 | 1.07 |
| -2 | -4 | 13  | 12.77 | 0.80 |
| -2 | -4 | 13  | 13.62 | 1.10 |
| 3  | 4  | -13 | 15.59 | 1.36 |
| -3 | 4  | 13  | 15.97 | 1.30 |
| -3 | 4  | 13  | 15.63 | 1.11 |
| 3  | -4 | 13  | 18.21 | 1.34 |
| 3  | -4 | 13  | 17.29 | 1.44 |
| -3 | -4 | -13 | 17.35 | 1.68 |
| 3  | -4 | -13 | 16.45 | 1.68 |
| -3 | -4 | 13  | 17.40 | 1.19 |
| -3 | -4 | 13  | 16.18 | 1.10 |
| -3 | -4 | 13  | 17.70 | 1.36 |
| 3  | 4  | 13  | 17.04 | 1.26 |
| -3 | 4  | -13 | 22.19 | 2.57 |
| -4 | 4  | 13  | 5.80  | 0.95 |
| -4 | 4  | 13  | 6.70  | 0.83 |
| -4 | -4 | -13 | 4.84  | 1.26 |

## CIF S3

|    |    |     |       |      |
|----|----|-----|-------|------|
| 4  | -4 | 13  | 7.21  | 1.06 |
| 4  | -4 | 13  | 6.55  | 1.11 |
| -4 | 4  | 13  | 8.07  | 0.83 |
| -4 | 4  | 13  | 7.69  | 0.88 |
| -4 | -4 | -13 | 5.50  | 1.08 |
| 4  | 4  | 13  | 6.75  | 0.83 |
| -4 | -4 | 13  | 5.99  | 0.71 |
| -4 | -4 | 13  | 6.91  | 0.53 |
| 4  | 4  | 13  | 6.84  | 0.79 |
| 4  | 4  | 13  | 7.21  | 0.89 |
| -4 | -4 | 13  | 7.26  | 0.67 |
| -4 | 4  | -13 | 6.93  | 1.27 |
| -4 | 4  | -13 | 5.74  | 1.40 |
| -4 | -4 | 13  | 6.30  | 0.59 |
| -4 | -4 | 13  | 5.12  | 1.07 |
| -4 | 4  | -13 | 7.77  | 1.50 |
| -5 | 4  | 13  | 1.02  | 0.43 |
| -5 | -4 | -13 | 1.94  | 0.81 |
| -5 | 4  | 13  | 1.29  | 0.41 |
| -5 | 4  | 13  | 1.71  | 0.56 |
| -5 | -4 | -13 | 3.18  | 1.11 |
| -5 | 4  | 13  | 1.81  | 0.48 |
| -5 | -4 | 13  | 1.79  | 0.35 |
| -5 | -4 | 13  | 2.12  | 0.40 |
| 5  | 4  | 13  | 1.66  | 0.45 |
| 5  | 4  | 13  | 2.10  | 0.52 |
| -5 | -4 | 13  | 3.03  | 0.88 |
| -5 | 4  | -13 | 1.83  | 1.03 |
| -5 | 4  | -13 | 1.82  | 0.87 |
| -5 | -4 | 13  | 1.52  | 0.38 |
| -6 | -4 | -13 | -0.30 | 0.56 |
| -6 | -4 | -13 | 0.00  | 0.37 |
| -6 | -4 | -13 | 0.65  | 0.93 |
| -6 | 4  | 13  | 0.52  | 0.45 |
| -6 | 4  | 13  | 0.27  | 0.32 |
| -6 | 4  | 13  | 0.11  | 0.32 |
| -6 | -4 | -13 | -0.26 | 0.67 |
| -6 | 4  | -13 | 0.08  | 0.84 |
| 6  | 4  | 13  | 0.11  | 0.42 |
| -6 | 4  | -13 | -0.39 | 0.96 |
| 6  | 4  | 13  | -0.15 | 0.47 |

## CIF S3

|    |    |     |       |      |
|----|----|-----|-------|------|
| -7 | 4  | 13  | 1.61  | 0.28 |
| -7 | -4 | -13 | 2.07  | 0.52 |
| -7 | 4  | 13  | 2.28  | 0.41 |
| -7 | -4 | -13 | 0.59  | 0.54 |
| -7 | -4 | -13 | 1.64  | 0.54 |
| -7 | -4 | -13 | 1.22  | 0.93 |
| -7 | 4  | -13 | 3.96  | 1.03 |
| -7 | 4  | -13 | 4.15  | 1.10 |
| 7  | 4  | 13  | 0.93  | 0.38 |
| -7 | 4  | -13 | 1.81  | 0.32 |
| 7  | 4  | 13  | 1.65  | 0.43 |
| -8 | -4 | -13 | 0.06  | 0.39 |
| -8 | -4 | -13 | 0.08  | 0.39 |
| -8 | -4 | -13 | 0.17  | 0.62 |
| -8 | 4  | -13 | -0.15 | 0.37 |
| 8  | 4  | 13  | 0.15  | 0.29 |
| -8 | 4  | -13 | -0.17 | 0.52 |
| 8  | 4  | 13  | 0.26  | 0.24 |
| 0  | 5  | -13 | 1.56  | 0.86 |
| 0  | -5 | 13  | 0.89  | 0.57 |
| 0  | -5 | 13  | 0.58  | 0.76 |
| 0  | 5  | 13  | 1.16  | 0.57 |
| 0  | -5 | 13  | 2.40  | 0.61 |
| 0  | 5  | 13  | 0.77  | 0.49 |
| 0  | -5 | -13 | -2.32 | 1.45 |
| 0  | -5 | 13  | 1.68  | 0.60 |
| 1  | -5 | 13  | 1.05  | 0.58 |
| 1  | -5 | 13  | 3.29  | 0.72 |
| -1 | 5  | 13  | 2.50  | 0.59 |
| -1 | 5  | 13  | 1.34  | 0.57 |
| 1  | -5 | 13  | 3.61  | 1.12 |
| 1  | -5 | 13  | 2.17  | 0.89 |
| 1  | -5 | 13  | 2.12  | 0.62 |
| 1  | 5  | -13 | 3.22  | 0.86 |
| -1 | -5 | 13  | 2.74  | 0.52 |
| 1  | -5 | -13 | -0.13 | 1.29 |
| 1  | 5  | 13  | 0.97  | 0.56 |
| -1 | -5 | 13  | 2.55  | 0.69 |
| -1 | 5  | -13 | 1.38  | 0.94 |
| -1 | -5 | 13  | 2.68  | 0.65 |
| 1  | 5  | 13  | 1.43  | 0.61 |

## CIF S3

|    |    |     |       |      |
|----|----|-----|-------|------|
| -1 | -5 | 13  | 2.68  | 0.78 |
| 2  | 5  | -13 | 7.86  | 1.09 |
| -2 | -5 | -13 | 10.16 | 1.51 |
| 2  | -5 | 13  | 10.22 | 1.14 |
| -2 | 5  | 13  | 9.93  | 1.13 |
| -2 | 5  | 13  | 12.10 | 0.95 |
| 2  | -5 | 13  | 9.36  | 0.98 |
| 2  | 5  | 13  | 10.67 | 1.07 |
| -2 | -5 | 13  | 10.07 | 0.71 |
| -2 | -5 | 13  | 10.61 | 1.08 |
| 2  | -5 | -13 | 11.90 | 1.62 |
| -2 | -5 | 13  | 10.64 | 1.02 |
| 3  | -5 | 13  | 16.25 | 1.28 |
| 3  | -5 | 13  | 14.97 | 1.90 |
| -3 | 5  | 13  | 14.74 | 1.06 |
| 3  | -5 | 13  | 18.71 | 2.05 |
| -3 | 5  | 13  | 13.20 | 1.23 |
| 3  | -5 | 13  | 15.86 | 1.24 |
| -3 | -5 | -13 | 10.15 | 1.52 |
| -3 | 5  | 13  | 10.11 | 1.54 |
| -3 | 5  | 13  | 9.06  | 1.38 |
| -3 | -5 | -13 | 16.34 | 2.02 |
| -3 | 5  | 13  | 12.48 | 1.60 |
| 3  | 5  | 13  | 15.75 | 1.16 |
| -3 | -5 | 13  | 9.69  | 1.26 |
| -3 | -5 | 13  | 14.84 | 1.09 |
| -3 | -5 | 13  | 16.25 | 1.26 |
| -3 | -5 | 13  | 13.72 | 0.98 |
| 4  | -5 | 13  | 2.73  | 0.76 |
| -4 | -5 | -13 | 4.21  | 0.78 |
| -4 | 5  | 13  | 0.95  | 0.65 |
| -4 | 5  | 13  | 1.84  | 0.54 |
| 4  | -5 | 13  | 2.19  | 0.99 |
| -4 | 5  | 13  | 2.31  | 0.55 |
| -4 | 5  | 13  | 2.45  | 0.57 |
| -4 | 5  | 13  | 2.51  | 0.57 |
| -4 | -5 | -13 | -0.38 | 0.95 |
| -4 | 5  | -13 | 3.45  | 1.17 |
| -4 | -5 | 13  | 2.19  | 0.44 |
| 4  | 5  | 13  | 2.53  | 0.53 |
| -4 | -5 | 13  | 3.20  | 0.59 |

## CIF S3

|    |    |     |       |      |
|----|----|-----|-------|------|
| -4 | -5 | 13  | 4.75  | 0.88 |
| -4 | 5  | -13 | 2.52  | 0.91 |
| 4  | 5  | 13  | 0.85  | 0.62 |
| -4 | 5  | -13 | 2.57  | 1.14 |
| -4 | -5 | 13  | 2.46  | 0.50 |
| -4 | 5  | -13 | 2.12  | 0.75 |
| 4  | 5  | 13  | 3.03  | 0.73 |
| -4 | -5 | 13  | 2.89  | 0.39 |
| -5 | 5  | 13  | 0.18  | 0.53 |
| -5 | 5  | 13  | -0.03 | 0.46 |
| -5 | 5  | 13  | 0.37  | 0.40 |
| -5 | 5  | 13  | -0.14 | 0.48 |
| -5 | -5 | -13 | 0.46  | 0.76 |
| -5 | -5 | -13 | -0.05 | 0.69 |
| -5 | -5 | 13  | 0.12  | 0.20 |
| -5 | -5 | 13  | 0.22  | 0.24 |
| -5 | -5 | 13  | -0.31 | 0.71 |
| 5  | 5  | 13  | 0.29  | 0.48 |
| 5  | 5  | 13  | -0.01 | 0.40 |
| -5 | 5  | -13 | 0.32  | 0.96 |
| -5 | 5  | -13 | 1.20  | 0.92 |
| -5 | -5 | 13  | 0.13  | 0.22 |
| -6 | -5 | -13 | 2.22  | 0.70 |
| -6 | 5  | 13  | 1.75  | 0.37 |
| -6 | -5 | -13 | 1.02  | 0.57 |
| -6 | -5 | -13 | 1.71  | 0.94 |
| -6 | -5 | -13 | 2.34  | 0.86 |
| -6 | 5  | 13  | 2.12  | 0.48 |
| -6 | -5 | -13 | 1.00  | 0.95 |
| -6 | 5  | 13  | 1.58  | 0.37 |
| 6  | 5  | 13  | 2.34  | 0.69 |
| -6 | 5  | -13 | 1.37  | 0.90 |
| -6 | 5  | -13 | 0.86  | 0.95 |
| 6  | 5  | 13  | 1.39  | 0.46 |
| -7 | 5  | 13  | 0.94  | 0.28 |
| -7 | -5 | -13 | 1.81  | 0.44 |
| -7 | -5 | -13 | 1.56  | 0.73 |
| -7 | 5  | 13  | 0.91  | 0.28 |
| -7 | -5 | -13 | 2.10  | 0.55 |
| -7 | 5  | -13 | 1.80  | 0.77 |
| 7  | 5  | 13  | 1.68  | 0.41 |

## CIF S3

|    |    |     |       |      |
|----|----|-----|-------|------|
| 7  | 5  | 13  | 1.15  | 0.34 |
| -8 | -5 | -13 | 4.11  | 0.69 |
| -8 | -5 | -13 | 3.49  | 0.52 |
| -8 | -5 | -13 | 5.38  | 0.77 |
| -8 | 5  | -13 | 4.88  | 0.69 |
| 8  | 5  | 13  | 4.16  | 0.47 |
| -8 | 5  | -13 | 3.55  | 0.78 |
| 0  | 6  | 13  | 3.92  | 0.80 |
| 0  | -6 | 13  | 3.59  | 0.78 |
| 0  | 6  | 13  | 3.36  | 0.79 |
| 0  | -6 | 13  | 3.88  | 0.88 |
| 0  | -6 | 13  | 2.91  | 1.12 |
| 0  | -6 | 13  | 3.88  | 0.84 |
| 0  | -6 | 13  | 3.89  | 0.81 |
| 1  | -6 | 13  | 14.11 | 1.40 |
| -1 | 6  | 13  | 12.10 | 1.05 |
| 1  | -6 | 13  | 12.51 | 1.04 |
| 1  | -6 | 13  | 11.28 | 1.13 |
| 1  | -6 | 13  | 11.44 | 1.12 |
| -1 | 6  | 13  | 12.42 | 1.08 |
| 1  | 6  | 13  | 10.22 | 1.07 |
| -1 | -6 | 13  | 11.77 | 0.72 |
| -1 | -6 | 13  | 14.17 | 1.18 |
| -1 | -6 | 13  | 14.83 | 1.14 |
| -1 | -6 | 13  | 11.90 | 1.00 |
| -2 | 6  | 13  | 3.68  | 0.97 |
| 2  | -6 | 13  | 5.15  | 1.05 |
| -2 | -6 | -13 | 4.16  | 1.44 |
| 2  | -6 | 13  | 4.64  | 0.78 |
| -2 | 6  | 13  | 4.53  | 0.86 |
| 2  | -6 | 13  | 5.70  | 1.05 |
| -2 | -6 | -13 | 1.17  | 1.10 |
| 2  | -6 | 13  | 5.99  | 1.31 |
| -2 | 6  | 13  | 4.43  | 1.01 |
| 2  | -6 | 13  | 5.55  | 1.70 |
| 2  | -6 | 13  | 4.31  | 0.89 |
| 2  | -6 | 13  | 4.44  | 1.08 |
| -2 | 6  | 13  | 4.40  | 0.97 |
| -2 | -6 | 13  | 4.92  | 0.97 |
| -2 | -6 | 13  | 5.39  | 0.97 |
| -2 | -6 | 13  | 6.79  | 0.91 |

## CIF S3

|    |    |     |       |      |
|----|----|-----|-------|------|
| 2  | 6  | 13  | 4.98  | 0.92 |
| -2 | -6 | 13  | 4.68  | 0.49 |
| 2  | 6  | 13  | 5.25  | 1.08 |
| -2 | -6 | 13  | 5.35  | 0.97 |
| -3 | -6 | -13 | 1.63  | 1.07 |
| -3 | 6  | 13  | 2.70  | 0.66 |
| 3  | -6 | 13  | 3.64  | 0.82 |
| 3  | -6 | 13  | 1.25  | 0.70 |
| 3  | -6 | 13  | 2.49  | 0.85 |
| -3 | -6 | -13 | 2.83  | 0.80 |
| 3  | -6 | 13  | 2.90  | 1.33 |
| -3 | 6  | 13  | 3.34  | 0.88 |
| -3 | 6  | 13  | 1.66  | 0.60 |
| -3 | 6  | 13  | 2.22  | 0.72 |
| -3 | 6  | 13  | 4.33  | 0.99 |
| -3 | 6  | 13  | 1.68  | 0.60 |
| 3  | 6  | 13  | 2.68  | 0.57 |
| -3 | -6 | 13  | 2.26  | 0.46 |
| -3 | -6 | 13  | 1.87  | 0.53 |
| -3 | -6 | 13  | 3.34  | 0.70 |
| -3 | -6 | 13  | 2.38  | 0.60 |
| -3 | -6 | 13  | 2.09  | 0.43 |
| 3  | 6  | 13  | 1.74  | 0.67 |
| -3 | -6 | 13  | 3.49  | 0.83 |
| -4 | 6  | 13  | 7.03  | 0.84 |
| -4 | 6  | 13  | 8.12  | 1.02 |
| -4 | 6  | 13  | 7.22  | 0.90 |
| -4 | 6  | 13  | 7.18  | 0.99 |
| -4 | -6 | -13 | 6.27  | 0.96 |
| -4 | 6  | 13  | 8.49  | 0.91 |
| -4 | 6  | -13 | 7.63  | 1.39 |
| -4 | -6 | 13  | 8.37  | 0.97 |
| -4 | -6 | 13  | 6.63  | 0.65 |
| -4 | -6 | 13  | 7.22  | 0.64 |
| -4 | 6  | -13 | 7.03  | 1.52 |
| 4  | 6  | 13  | 6.21  | 0.82 |
| -4 | -6 | 13  | 7.36  | 0.47 |
| -5 | -6 | -13 | 9.22  | 1.09 |
| -5 | 6  | 13  | 9.20  | 0.93 |
| -5 | -6 | -13 | 8.35  | 1.08 |
| -5 | 6  | 13  | 10.04 | 0.88 |

## CIF S3

|    |    |     |       |      |
|----|----|-----|-------|------|
| -5 | -6 | -13 | 8.35  | 1.23 |
| -5 | 6  | 13  | 8.85  | 1.27 |
| -5 | -6 | -13 | 8.72  | 0.94 |
| 5  | 6  | 13  | 10.30 | 0.88 |
| -5 | 6  | -13 | 10.08 | 1.36 |
| -5 | -6 | 13  | 10.06 | 0.59 |
| -5 | 6  | -13 | 6.99  | 1.47 |
| -5 | -6 | 13  | 9.70  | 0.60 |
| -5 | -6 | 13  | 10.09 | 0.57 |
| -6 | -6 | -13 | 1.74  | 1.39 |
| -6 | 6  | 13  | 2.79  | 0.68 |
| -6 | -6 | -13 | 3.73  | 0.84 |
| -6 | -6 | -13 | 2.68  | 0.65 |
| -6 | -6 | -13 | 3.95  | 0.85 |
| -6 | 6  | 13  | 3.88  | 0.61 |
| -6 | -6 | -13 | 4.37  | 0.90 |
| -6 | -6 | -13 | 2.73  | 0.86 |
| -6 | 6  | 13  | 2.83  | 0.60 |
| -6 | 6  | 13  | 3.94  | 0.71 |
| 6  | 6  | 13  | 3.52  | 0.69 |
| -6 | 6  | -13 | 2.68  | 0.88 |
| 6  | 6  | 13  | 3.78  | 0.66 |
| -7 | 6  | 13  | 1.23  | 0.26 |
| -7 | -6 | -13 | 1.18  | 0.59 |
| -7 | -6 | -13 | 0.44  | 0.28 |
| -7 | -6 | -13 | 0.98  | 0.44 |
| -7 | 6  | -13 | 0.49  | 0.63 |
| 7  | 6  | 13  | 2.07  | 0.54 |
| 0  | -7 | 13  | 0.69  | 0.69 |
| 0  | -7 | 13  | 0.24  | 0.65 |
| 0  | 7  | 13  | -0.99 | 0.62 |
| 0  | 7  | 13  | -0.38 | 0.59 |
| 0  | -7 | 13  | -0.33 | 0.64 |
| 0  | -7 | 13  | 0.37  | 0.83 |
| 0  | 7  | 13  | 0.34  | 0.64 |
| 0  | -7 | 13  | -0.09 | 0.51 |
| 0  | -7 | 13  | -0.03 | 0.77 |
| 0  | -7 | 13  | 0.68  | 1.08 |
| 0  | -7 | 13  | 1.23  | 0.67 |
| 0  | 7  | 13  | -0.38 | 0.51 |
| 0  | -7 | 13  | 0.62  | 0.63 |



## CIF S3

|    |    |     |       |      |
|----|----|-----|-------|------|
| 0  | -7 | 13  | -0.53 | 0.56 |
| -1 | 7  | 13  | 2.79  | 0.69 |
| 1  | -7 | 13  | 2.69  | 0.79 |
| 1  | -7 | 13  | 3.17  | 0.84 |
| 1  | -7 | 13  | 2.18  | 0.66 |
| 1  | -7 | 13  | 3.65  | 0.95 |
| 1  | -7 | 13  | 4.01  | 0.95 |
| -1 | 7  | 13  | 1.77  | 0.77 |
| 1  | -7 | 13  | 1.58  | 0.72 |
| 1  | -7 | 13  | 4.39  | 1.14 |
| -1 | 7  | 13  | 4.71  | 0.79 |
| -1 | 7  | 13  | 1.04  | 0.66 |
| -1 | 7  | 13  | 2.58  | 0.71 |
| -1 | 7  | 13  | 3.60  | 0.61 |
| 1  | -7 | 13  | 2.89  | 0.65 |
| -1 | -7 | 13  | 3.56  | 0.58 |
| 1  | 7  | 13  | 1.35  | 0.70 |
| -1 | -7 | 13  | 2.93  | 0.89 |
| -1 | -7 | 13  | 2.75  | 0.77 |
| 1  | 7  | 13  | 2.96  | 0.78 |
| -1 | -7 | 13  | 3.00  | 0.67 |
| -1 | -7 | 13  | 3.76  | 0.78 |
| 1  | 7  | 13  | 1.08  | 0.65 |
| -1 | -7 | 13  | 3.06  | 0.80 |
| -1 | -7 | 13  | 2.94  | 0.65 |
| -1 | -7 | 13  | 5.66  | 1.31 |
| 2  | -7 | 13  | 14.45 | 1.27 |
| -2 | 7  | 13  | 15.17 | 1.19 |
| 2  | -7 | 13  | 12.38 | 1.29 |
| -2 | -7 | -13 | 14.28 | 1.69 |
| 2  | -7 | 13  | 15.14 | 1.28 |
| -2 | 7  | 13  | 13.48 | 1.21 |
| 2  | -7 | 13  | 14.91 | 1.26 |
| -2 | -7 | -13 | 12.87 | 1.43 |
| 2  | -7 | 13  | 11.51 | 1.19 |
| 2  | -7 | 13  | 14.09 | 1.49 |
| 2  | -7 | 13  | 13.38 | 1.38 |
| 2  | -7 | 13  | 13.82 | 1.69 |
| -2 | 7  | 13  | 15.57 | 1.16 |
| -2 | 7  | 13  | 14.23 | 1.32 |
| -2 | -7 | 13  | 14.67 | 1.21 |

## CIF S3

|    |    |     |       |      |
|----|----|-----|-------|------|
| -2 | -7 | 13  | 13.88 | 1.18 |
| -2 | -7 | 13  | 12.25 | 1.06 |
| -2 | -7 | 13  | 14.01 | 1.05 |
| 2  | 7  | 13  | 13.54 | 1.19 |
| 2  | 7  | 13  | 13.64 | 1.02 |
| 3  | -7 | 13  | 7.56  | 1.37 |
| -3 | 7  | 13  | 9.31  | 1.07 |
| 3  | -7 | 13  | 7.25  | 1.16 |
| -3 | 7  | 13  | 10.11 | 1.12 |
| 3  | -7 | 13  | 8.14  | 1.51 |
| -3 | 7  | 13  | 9.90  | 1.02 |
| -3 | 7  | 13  | 8.53  | 0.98 |
| 3  | -7 | 13  | 8.41  | 1.12 |
| -3 | 7  | 13  | 8.39  | 1.06 |
| -3 | 7  | 13  | 8.36  | 1.04 |
| -3 | -7 | -13 | 8.84  | 0.95 |
| -3 | -7 | 13  | 7.93  | 0.82 |
| -3 | -7 | 13  | 7.83  | 0.87 |
| -3 | -7 | 13  | 7.79  | 0.79 |
| 3  | 7  | 13  | 7.51  | 0.88 |
| -3 | -7 | 13  | 8.26  | 0.80 |
| -3 | -7 | 13  | 9.16  | 1.05 |
| -4 | 7  | 13  | 11.13 | 1.02 |
| 4  | -7 | 13  | 10.96 | 1.22 |
| -4 | 7  | 13  | 11.77 | 1.07 |
| -4 | 7  | 13  | 12.30 | 1.07 |
| -4 | -7 | -13 | 12.52 | 1.45 |
| -4 | 7  | 13  | 12.18 | 0.95 |
| -4 | 7  | 13  | 11.30 | 1.13 |
| -4 | 7  | 13  | 10.73 | 1.33 |
| -4 | 7  | -13 | 11.53 | 1.30 |
| -4 | 7  | -13 | 11.32 | 1.53 |
| -4 | -7 | 13  | 11.73 | 1.12 |
| -4 | -7 | 13  | 12.21 | 0.79 |
| 4  | 7  | 13  | 12.17 | 0.99 |
| -5 | -7 | -13 | 1.19  | 0.36 |
| -5 | 7  | 13  | 0.88  | 0.47 |
| -5 | 7  | 13  | 1.70  | 0.69 |
| -5 | -7 | -13 | 1.22  | 0.79 |
| -5 | 7  | 13  | 1.15  | 0.53 |
| -5 | -7 | -13 | 2.09  | 0.70 |

## CIF S3

|    |    |     |       |      |
|----|----|-----|-------|------|
| -5 | -7 | -13 | 1.28  | 0.90 |
| -5 | 7  | -13 | 2.12  | 0.84 |
| 5  | 7  | 13  | 1.15  | 0.48 |
| -5 | -7 | 13  | 1.63  | 0.34 |
| -5 | -7 | 13  | 2.05  | 0.27 |
| -5 | -7 | 13  | 1.67  | 0.34 |
| -6 | 7  | 13  | 1.41  | 0.35 |
| -6 | -7 | -13 | 0.50  | 0.35 |
| -6 | 7  | 13  | 1.36  | 0.42 |
| -6 | -7 | -13 | 1.13  | 0.52 |
| -6 | 7  | 13  | 1.46  | 0.36 |
| -6 | -7 | -13 | 1.17  | 0.48 |
| 6  | 7  | 13  | 1.02  | 0.40 |
| -6 | 7  | -13 | 0.96  | 0.73 |
| -6 | 7  | -13 | 1.48  | 0.42 |
| -7 | -7 | -13 | 0.80  | 0.40 |
| -7 | -7 | -13 | 0.17  | 0.40 |
| -7 | 7  | 13  | 0.26  | 0.22 |
| -7 | 7  | -13 | 0.04  | 0.54 |
| 7  | 7  | 13  | 0.67  | 0.32 |
| 0  | -8 | 13  | -0.08 | 0.63 |
| 0  | -8 | 13  | 0.32  | 0.63 |
| 0  | -8 | 13  | -0.66 | 0.54 |
| 0  | -8 | 13  | 0.07  | 0.62 |
| 0  | -8 | 13  | 0.61  | 0.77 |
| 0  | -8 | 13  | 0.38  | 0.49 |
| 0  | 8  | 13  | -0.32 | 0.61 |
| 0  | -8 | 13  | 0.25  | 0.62 |
| 0  | -8 | 13  | 0.89  | 1.14 |
| 0  | 8  | 13  | -0.45 | 0.56 |
| 0  | 8  | 13  | -0.52 | 0.68 |
| 0  | -8 | 13  | 0.14  | 0.78 |
| 0  | -8 | 13  | 0.98  | 0.66 |
| -1 | 8  | 13  | 0.24  | 0.34 |
| 1  | -8 | 13  | 0.08  | 0.69 |
| 1  | -8 | 13  | 0.34  | 0.65 |
| 1  | -8 | 13  | 0.32  | 0.60 |
| -1 | 8  | 13  | 0.56  | 0.64 |
| -1 | 8  | 13  | -0.20 | 0.64 |
| -1 | 8  | 13  | 0.18  | 0.78 |
| 1  | -8 | 13  | -0.06 | 0.62 |

## CIF S3

|    |    |     |       |      |
|----|----|-----|-------|------|
| -1 | 8  | 13  | 0.48  | 0.66 |
| 1  | -8 | 13  | 1.11  | 0.86 |
| 1  | -8 | 13  | 0.65  | 1.14 |
| -1 | -8 | -13 | 0.55  | 0.89 |
| 1  | -8 | 13  | 0.67  | 0.68 |
| 1  | -8 | 13  | -0.27 | 0.69 |
| -1 | -8 | 13  | 0.59  | 0.69 |
| -1 | -8 | 13  | 1.61  | 1.15 |
| -1 | -8 | 13  | 0.85  | 0.61 |
| -1 | -8 | 13  | 0.49  | 0.56 |
| 1  | 8  | 13  | -1.21 | 1.19 |
| -1 | -8 | 13  | 0.08  | 0.51 |
| 1  | 8  | 13  | 0.03  | 0.50 |
| -1 | -8 | 13  | 0.58  | 0.59 |
| -1 | -8 | 13  | 0.03  | 0.71 |
| -2 | -8 | -13 | 3.22  | 0.96 |
| 2  | -8 | 13  | 2.65  | 0.94 |
| 2  | -8 | 13  | 2.44  | 0.76 |
| 2  | -8 | 13  | 3.50  | 1.14 |
| -2 | 8  | 13  | 3.50  | 0.94 |
| -2 | 8  | 13  | 2.05  | 0.70 |
| 2  | -8 | 13  | 1.59  | 0.53 |
| 2  | -8 | 13  | 3.59  | 0.81 |
| -2 | 8  | 13  | 2.82  | 0.81 |
| 2  | -8 | 13  | 3.75  | 0.99 |
| -2 | 8  | 13  | 2.00  | 0.68 |
| 2  | -8 | 13  | 3.84  | 0.85 |
| 2  | -8 | 13  | 3.92  | 1.02 |
| -2 | -8 | 13  | 1.89  | 0.52 |
| -2 | -8 | 13  | 3.39  | 0.72 |
| -2 | -8 | 13  | 3.46  | 0.84 |
| 2  | 8  | 13  | 3.92  | 0.81 |
| -2 | -8 | 13  | 2.16  | 0.73 |
| -3 | 8  | 13  | 0.90  | 0.58 |
| 3  | -8 | 13  | 1.34  | 0.79 |
| -3 | 8  | 13  | 0.22  | 0.64 |
| 3  | -8 | 13  | 3.03  | 1.17 |
| 3  | -8 | 13  | 1.00  | 0.69 |
| -3 | 8  | 13  | 1.14  | 0.62 |
| -3 | 8  | 13  | 1.18  | 0.61 |
| 3  | -8 | 13  | 3.33  | 0.98 |

## CIF S3

|    |    |     |       |      |
|----|----|-----|-------|------|
| 3  | -8 | 13  | 1.20  | 0.73 |
| -3 | 8  | 13  | 0.83  | 0.73 |
| 3  | -8 | 13  | 0.33  | 0.41 |
| -3 | -8 | 13  | 1.02  | 0.45 |
| -3 | -8 | 13  | 0.84  | 0.64 |
| -3 | -8 | 13  | 1.20  | 0.42 |
| -3 | -8 | 13  | 1.29  | 0.43 |
| 3  | 8  | 13  | 0.97  | 0.53 |
| -4 | -8 | -13 | 0.51  | 0.91 |
| 4  | -8 | 13  | 2.36  | 0.71 |
| -4 | 8  | 13  | 0.79  | 0.57 |
| -4 | 8  | 13  | 1.38  | 0.52 |
| -4 | 8  | 13  | 0.75  | 0.54 |
| -4 | 8  | 13  | 0.68  | 0.50 |
| -4 | -8 | -13 | 1.16  | 0.53 |
| -4 | 8  | 13  | 1.16  | 0.67 |
| -4 | -8 | 13  | 1.86  | 0.35 |
| -4 | 8  | -13 | 1.71  | 0.83 |
| 4  | 8  | 13  | 1.04  | 0.49 |
| -5 | -8 | -13 | 6.16  | 0.93 |
| -5 | 8  | 13  | 5.15  | 0.77 |
| -5 | -8 | -13 | 3.92  | 1.11 |
| -5 | 8  | 13  | 4.23  | 0.87 |
| -5 | 8  | 13  | 6.55  | 0.75 |
| -5 | -8 | 13  | 6.46  | 0.40 |
| -5 | -8 | 13  | 6.14  | 0.40 |
| 5  | 8  | 13  | 5.82  | 0.75 |
| -5 | 8  | -13 | 4.53  | 1.05 |
| -6 | 8  | 13  | 2.14  | 0.50 |
| -6 | 8  | 13  | 2.34  | 0.65 |
| -6 | -8 | -13 | 2.02  | 0.49 |
| -6 | -8 | -13 | 2.76  | 0.71 |
| -6 | 8  | 13  | 0.84  | 0.38 |
| -6 | 8  | -13 | 1.82  | 0.62 |
| 6  | 8  | 13  | 1.28  | 0.37 |
| -6 | 8  | -13 | 2.34  | 0.55 |
| 0  | -9 | 13  | 0.91  | 0.60 |
| 0  | -9 | 13  | -0.45 | 0.72 |
| 0  | 9  | 13  | 0.66  | 0.60 |
| 0  | -9 | 13  | 0.18  | 1.05 |
| 0  | -9 | 13  | 1.61  | 0.44 |

## CIF S3

|    |    |     |      |      |
|----|----|-----|------|------|
| 0  | -9 | 13  | 0.47 | 0.61 |
| 0  | 9  | 13  | 1.52 | 0.71 |
| 0  | -9 | 13  | 0.69 | 0.56 |
| 0  | -9 | 13  | 2.31 | 1.08 |
| 0  | -9 | 13  | 1.92 | 0.62 |
| 0  | -9 | 13  | 0.97 | 0.63 |
| 0  | 9  | 13  | 0.37 | 0.77 |
| 0  | -9 | 13  | 0.63 | 0.67 |
| 0  | 9  | 13  | 1.07 | 0.51 |
| 0  | -9 | -13 | 1.21 | 0.86 |
| -1 | 9  | 13  | 4.57 | 0.56 |
| 1  | -9 | 13  | 5.14 | 0.81 |
| -1 | 9  | 13  | 2.52 | 0.84 |
| 1  | -9 | 13  | 4.25 | 0.95 |
| -1 | 9  | 13  | 2.58 | 0.73 |
| 1  | -9 | 13  | 4.73 | 0.90 |
| 1  | -9 | 13  | 5.20 | 0.92 |
| 1  | -9 | 13  | 4.37 | 1.40 |
| 1  | -9 | 13  | 5.88 | 1.13 |
| -1 | 9  | 13  | 4.92 | 0.94 |
| 1  | -9 | 13  | 4.78 | 1.26 |
| -1 | -9 | -13 | 4.04 | 1.04 |
| 1  | -9 | 13  | 4.22 | 0.92 |
| -1 | 9  | 13  | 4.24 | 1.01 |
| 1  | -9 | 13  | 3.93 | 0.97 |
| -1 | -9 | 13  | 4.45 | 0.81 |
| -1 | -9 | 13  | 4.47 | 0.84 |
| -1 | -9 | 13  | 4.47 | 0.75 |
| -1 | -9 | 13  | 3.58 | 0.92 |
| -1 | -9 | 13  | 3.70 | 0.91 |
| -1 | -9 | 13  | 7.15 | 1.27 |
| -1 | -9 | 13  | 5.44 | 0.92 |
| 1  | 9  | 13  | 4.90 | 0.89 |
| 2  | -9 | 13  | 7.25 | 0.97 |
| 2  | -9 | 13  | 6.48 | 1.01 |
| 2  | -9 | 13  | 6.55 | 1.00 |
| -2 | 9  | 13  | 7.21 | 1.02 |
| -2 | 9  | 13  | 7.35 | 0.95 |
| 2  | -9 | 13  | 6.50 | 1.38 |
| -2 | 9  | 13  | 7.49 | 1.07 |
| 2  | -9 | 13  | 7.10 | 1.15 |

## CIF S3

|    |    |     |      |      |
|----|----|-----|------|------|
| 2  | -9 | 13  | 5.21 | 0.98 |
| 2  | -9 | 13  | 7.27 | 1.04 |
| -2 | -9 | -13 | 5.77 | 0.77 |
| -2 | 9  | 13  | 7.19 | 0.93 |
| 2  | -9 | 13  | 6.81 | 1.26 |
| 2  | 9  | 13  | 6.54 | 0.84 |
| -2 | -9 | 13  | 6.34 | 0.90 |
| -2 | -9 | 13  | 7.65 | 0.76 |
| -2 | -9 | 13  | 6.47 | 0.83 |
| -2 | -9 | 13  | 6.93 | 0.92 |
| -3 | 9  | 13  | 4.81 | 0.94 |
| -3 | 9  | 13  | 4.84 | 0.93 |
| -3 | 9  | 13  | 4.46 | 0.95 |
| 3  | -9 | 13  | 6.75 | 0.98 |
| 3  | -9 | 13  | 6.39 | 1.00 |
| 3  | -9 | 13  | 3.49 | 0.86 |
| -3 | 9  | 13  | 4.64 | 0.84 |
| -3 | 9  | 13  | 3.51 | 1.00 |
| 3  | -9 | 13  | 5.67 | 1.01 |
| -3 | 9  | 13  | 5.78 | 0.89 |
| 3  | -9 | 13  | 5.09 | 1.01 |
| -3 | -9 | 13  | 4.77 | 0.88 |
| -3 | -9 | 13  | 6.05 | 0.65 |
| -3 | -9 | 13  | 5.48 | 0.69 |
| 3  | 9  | 13  | 6.14 | 0.78 |
| -3 | -9 | 13  | 4.83 | 0.72 |
| -4 | 9  | 13  | 1.56 | 0.57 |
| -4 | -9 | -13 | 0.83 | 0.36 |
| -4 | 9  | 13  | 0.87 | 0.46 |
| -4 | 9  | 13  | 0.40 | 0.53 |
| 4  | -9 | 13  | 1.20 | 0.66 |
| -4 | 9  | 13  | 1.23 | 0.47 |
| -4 | 9  | 13  | 0.83 | 0.63 |
| -4 | -9 | 13  | 1.39 | 0.42 |
| -4 | 9  | -13 | 1.31 | 0.67 |
| 4  | 9  | 13  | 0.96 | 0.46 |
| -4 | -9 | 13  | 2.11 | 0.45 |
| -5 | 9  | 13  | 7.30 | 0.68 |
| -5 | 9  | 13  | 8.67 | 0.77 |
| -5 | 9  | 13  | 5.71 | 0.79 |
| -5 | -9 | -13 | 8.23 | 0.86 |

## CIF S3

|    |     |     |       |      |
|----|-----|-----|-------|------|
| -5 | -9  | -13 | 6.54  | 0.77 |
| 5  | 9   | 13  | 6.75  | 0.73 |
| -5 | 9   | -13 | 6.83  | 0.94 |
| 5  | -9  | -13 | 5.24  | 1.29 |
| -6 | 9   | 13  | 0.22  | 0.23 |
| -6 | 9   | 13  | -0.28 | 0.28 |
| -6 | -9  | -13 | 0.40  | 0.36 |
| -6 | 9   | -13 | 0.04  | 0.26 |
| 6  | 9   | 13  | 0.05  | 0.31 |
| 0  | -10 | 13  | 5.04  | 0.84 |
| 0  | -10 | 13  | 2.10  | 0.66 |
| 0  | -10 | 13  | 3.61  | 0.87 |
| 0  | 10  | 13  | 4.44  | 0.92 |
| 0  | 10  | 13  | 5.59  | 1.03 |
| 0  | 10  | 13  | 3.52  | 0.59 |
| 0  | -10 | -13 | 6.11  | 1.14 |
| 0  | -10 | 13  | 4.00  | 0.85 |
| 0  | -10 | 13  | 4.16  | 0.75 |
| 0  | -10 | 13  | 5.01  | 1.16 |
| 0  | -10 | 13  | 4.15  | 0.78 |
| 1  | -10 | 13  | 8.55  | 0.99 |
| 1  | -10 | 13  | 9.89  | 1.47 |
| 1  | -10 | 13  | 12.19 | 1.19 |
| 1  | -10 | 13  | 10.59 | 1.00 |
| 1  | -10 | 13  | 9.67  | 0.98 |
| -1 | -10 | -13 | 9.68  | 0.90 |
| 1  | -10 | 13  | 11.65 | 1.01 |
| -1 | 10  | 13  | 9.83  | 1.11 |
| 1  | -10 | 13  | 10.88 | 1.29 |
| -1 | 10  | 13  | 10.61 | 1.00 |
| 1  | -10 | 13  | 9.47  | 0.99 |
| -1 | 10  | 13  | 10.31 | 1.17 |
| 1  | -10 | 13  | 10.91 | 0.82 |
| -1 | 10  | 13  | 9.38  | 1.05 |
| -1 | 10  | 13  | 10.41 | 0.63 |
| 1  | -10 | -13 | 11.44 | 1.28 |
| 1  | -10 | -13 | 11.90 | 1.15 |
| -1 | -10 | 13  | 9.94  | 0.90 |
| -1 | -10 | 13  | 9.32  | 0.94 |
| 1  | 10  | 13  | 9.94  | 0.99 |
| -1 | -10 | 13  | 9.87  | 0.99 |



## CIF S3

|    |     |     |       |      |
|----|-----|-----|-------|------|
| -1 | -10 | 13  | 9.22  | 0.99 |
| -2 | 10  | 13  | 7.00  | 0.94 |
| 2  | -10 | 13  | 9.82  | 0.93 |
| 2  | -10 | 13  | 8.48  | 0.88 |
| 2  | -10 | 13  | 8.70  | 0.97 |
| -2 | 10  | 13  | 7.71  | 1.00 |
| 2  | -10 | 13  | 7.93  | 1.27 |
| 2  | -10 | 13  | 10.52 | 0.99 |
| -2 | 10  | 13  | 7.43  | 1.08 |
| 2  | -10 | 13  | 8.89  | 1.31 |
| -2 | 10  | 13  | 8.24  | 0.92 |
| 2  | 10  | 13  | 9.65  | 0.92 |
| 2  | -10 | -13 | 11.48 | 1.19 |
| -2 | -10 | 13  | 8.21  | 0.75 |
| -2 | -10 | 13  | 8.13  | 0.82 |
| -2 | -10 | 13  | 8.99  | 0.85 |
| -3 | 10  | 13  | 0.11  | 0.51 |
| -3 | 10  | 13  | 0.49  | 0.52 |
| -3 | 10  | 13  | 0.95  | 0.65 |
| -3 | 10  | 13  | 0.24  | 0.71 |
| 3  | -10 | 13  | 1.34  | 0.56 |
| 3  | -10 | 13  | 0.64  | 0.64 |
| -3 | -10 | -13 | 1.25  | 0.44 |
| 3  | -10 | 13  | 0.60  | 0.54 |
| -3 | 10  | 13  | 0.19  | 0.80 |
| -3 | -10 | 13  | 1.00  | 0.36 |
| -3 | -10 | 13  | 0.21  | 0.40 |
| 3  | 10  | 13  | 0.11  | 0.43 |
| -3 | -10 | 13  | 0.32  | 0.28 |
| -4 | 10  | 13  | 7.48  | 0.82 |
| -4 | 10  | 13  | 5.78  | 0.69 |
| -4 | 10  | 13  | 6.30  | 0.80 |
| -4 | 10  | 13  | 3.92  | 0.82 |
| -4 | 10  | 13  | 6.32  | 0.83 |
| 4  | -10 | 13  | 6.04  | 0.84 |
| 4  | 10  | 13  | 7.48  | 0.72 |
| -4 | 10  | -13 | 6.96  | 0.90 |
| -4 | -10 | 13  | 7.42  | 0.51 |
| -4 | -10 | 13  | 6.53  | 0.54 |
| 0  | -11 | -13 | 1.23  | 0.65 |
| 0  | 11  | 13  | 0.84  | 0.47 |

## CIF S3

|    |     |     |       |      |
|----|-----|-----|-------|------|
| 0  | 11  | 13  | 0.69  | 0.30 |
| 0  | -11 | 13  | 0.41  | 0.40 |
| 0  | -11 | 13  | 0.71  | 0.48 |
| 0  | -11 | 13  | 2.78  | 0.81 |
| 0  | -11 | 13  | 0.98  | 0.49 |
| 0  | -11 | 13  | 1.04  | 0.47 |
| 0  | -11 | -13 | 2.17  | 0.65 |
| 0  | 11  | 13  | 0.85  | 0.68 |
| 1  | -11 | 13  | 3.90  | 1.01 |
| 1  | -11 | 13  | 5.30  | 0.84 |
| -1 | 11  | 13  | 2.14  | 0.69 |
| 1  | -11 | 13  | 5.17  | 0.74 |
| 1  | -11 | 13  | 4.39  | 0.78 |
| -1 | 11  | 13  | 4.54  | 0.89 |
| 1  | -11 | 13  | 5.49  | 0.75 |
| -1 | -11 | -13 | 6.05  | 0.90 |
| -1 | 11  | 13  | 4.42  | 0.80 |
| -1 | -11 | 13  | 4.68  | 0.80 |
| 1  | -11 | -13 | 5.37  | 0.87 |
| 1  | -11 | -13 | 4.56  | 0.92 |
| -1 | -11 | 13  | 5.03  | 0.68 |
| -1 | -11 | 13  | 4.86  | 0.75 |
| 1  | 11  | 13  | 5.22  | 0.59 |
| 1  | 11  | 13  | 3.92  | 0.84 |
| -2 | 11  | 13  | 0.39  | 0.63 |
| -2 | 11  | 13  | -0.19 | 0.49 |
| -2 | -11 | -13 | 0.02  | 0.45 |
| 2  | -11 | 13  | 0.13  | 0.41 |
| -2 | 11  | 13  | 0.37  | 0.49 |
| 2  | -11 | 13  | 0.13  | 0.27 |
| 2  | -11 | 13  | 0.42  | 0.52 |
| 2  | -11 | 13  | -0.19 | 0.48 |
| 2  | -11 | -13 | 1.56  | 0.55 |
| -2 | -11 | 13  | 0.06  | 0.35 |
| -2 | -11 | 13  | 0.28  | 0.42 |
| 2  | -11 | -13 | -0.02 | 0.68 |
| 2  | 11  | 13  | 0.18  | 0.47 |
| -3 | 11  | 13  | 3.86  | 0.69 |
| -3 | 11  | 13  | 3.53  | 0.82 |
| 3  | -11 | 13  | 3.28  | 0.76 |
| -3 | 11  | 13  | 4.30  | 0.64 |

## CIF S3

|    |     |     |       |      |
|----|-----|-----|-------|------|
| 3  | -11 | 13  | 4.97  | 0.77 |
| -3 | 11  | 13  | 5.28  | 1.12 |
| 3  | -11 | -13 | 4.30  | 0.75 |
| -3 | -11 | 13  | 4.17  | 0.53 |
| -3 | 11  | -13 | 3.10  | 0.82 |
| -3 | -11 | 13  | 4.61  | 0.56 |
| 3  | -11 | -13 | 5.01  | 0.95 |
| 3  | 11  | 13  | 4.14  | 0.66 |
| -4 | 11  | 13  | 3.44  | 0.51 |
| -4 | 11  | 13  | 3.87  | 0.70 |
| 4  | -11 | 13  | 4.06  | 0.75 |
| 4  | -11 | -13 | 3.64  | 0.77 |
| -4 | -11 | 13  | 3.69  | 0.31 |
| 4  | 11  | 13  | 3.89  | 0.51 |
| -4 | -11 | 13  | 4.59  | 0.32 |
| 0  | -12 | 13  | 7.45  | 0.68 |
| 0  | -12 | 13  | 7.20  | 0.96 |
| 0  | -12 | 13  | 7.74  | 0.71 |
| 0  | 12  | 13  | 6.14  | 0.71 |
| 0  | 12  | 13  | 7.91  | 0.90 |
| 0  | -12 | 13  | 7.36  | 0.66 |
| -1 | 12  | 13  | -0.22 | 0.40 |
| 1  | -12 | 13  | 0.29  | 0.40 |
| 1  | -12 | 13  | 0.44  | 0.41 |
| 1  | -12 | 13  | 0.27  | 0.44 |
| -1 | 12  | 13  | 0.59  | 0.58 |
| 1  | -12 | 13  | -0.07 | 0.36 |
| -1 | 12  | 13  | 0.51  | 0.46 |
| 1  | -12 | 13  | 0.14  | 0.25 |
| -1 | -12 | -13 | 0.10  | 0.44 |
| -1 | -12 | 13  | -0.26 | 0.37 |
| -1 | -12 | 13  | 0.03  | 0.34 |
| 1  | 12  | 13  | -0.19 | 0.37 |
| 1  | 12  | 13  | -0.26 | 0.25 |
| -1 | -12 | 13  | 0.24  | 0.34 |
| -2 | 12  | 13  | 4.73  | 0.61 |
| -2 | 12  | 13  | 4.82  | 0.77 |
| 2  | -12 | 13  | 4.03  | 0.47 |
| -2 | 12  | 13  | 3.95  | 0.68 |
| 2  | -12 | 13  | 4.38  | 0.66 |
| -2 | -12 | 13  | 5.25  | 0.55 |

## CIF S3

|    |     |     |       |      |
|----|-----|-----|-------|------|
| 2  | 12  | 13  | 4.69  | 0.58 |
| 2  | 12  | 13  | 4.81  | 0.56 |
| -2 | -12 | 13  | 5.57  | 0.43 |
| 2  | -12 | -13 | 5.16  | 0.53 |
| 0  | 0   | 14  | 93.64 | 4.86 |
| 0  | 0   | -14 | 98.25 | 5.28 |
| 0  | 0   | -14 | 89.88 | 5.04 |
| 0  | 0   | 14  | 97.52 | 4.78 |
| -1 | 0   | 14  | 40.01 | 2.22 |
| -1 | 0   | 14  | 43.95 | 2.36 |
| 1  | 0   | -14 | 40.39 | 2.56 |
| -1 | 0   | -14 | 41.79 | 2.64 |
| 1  | 0   | -14 | 37.10 | 2.72 |
| 1  | 0   | 14  | 44.78 | 2.30 |
| 1  | 0   | 14  | 43.54 | 2.31 |
| -2 | 0   | 14  | 40.79 | 2.28 |
| 2  | 0   | -14 | 35.55 | 2.47 |
| 2  | 0   | 14  | 43.93 | 2.28 |
| -2 | 0   | 14  | 41.33 | 2.13 |
| 2  | 0   | -14 | 43.02 | 2.73 |
| -2 | 0   | 14  | 40.30 | 2.26 |
| 2  | 0   | 14  | 38.36 | 2.24 |
| 3  | 0   | -14 | 14.36 | 1.42 |
| -3 | 0   | 14  | 17.10 | 1.18 |
| -3 | 0   | 14  | 15.10 | 1.25 |
| -3 | 0   | -14 | 15.77 | 1.57 |
| 3  | 0   | 14  | 16.19 | 1.19 |
| -4 | 0   | -14 | 0.25  | 0.85 |
| -4 | 0   | 14  | 0.93  | 0.30 |
| 4  | 0   | 14  | 0.83  | 0.59 |
| -4 | 0   | 14  | 1.99  | 0.53 |
| -4 | 0   | 14  | 2.54  | 0.59 |
| -4 | 0   | -14 | 0.88  | 1.01 |
| -4 | 0   | 14  | 2.44  | 0.57 |
| -4 | 0   | 14  | 2.08  | 0.54 |
| -4 | 0   | 14  | 1.42  | 0.32 |
| -4 | 0   | 14  | 2.13  | 0.81 |
| -5 | 0   | -14 | 13.88 | 1.68 |
| -5 | 0   | 14  | 13.43 | 1.29 |
| -5 | 0   | 14  | 13.66 | 0.80 |
| 5  | 0   | 14  | 13.09 | 1.01 |

## CIF S3

|    |    |     |       |      |
|----|----|-----|-------|------|
| 6  | 0  | 14  | 2.89  | 0.60 |
| -6 | 0  | 14  | 3.50  | 0.36 |
| -6 | 0  | -14 | 2.39  | 0.69 |
| -6 | 0  | -14 | 2.17  | 0.97 |
| -6 | 0  | 14  | 2.88  | 0.33 |
| -6 | 0  | -14 | 3.28  | 0.90 |
| -6 | 0  | 14  | 2.95  | 0.34 |
| -7 | 0  | -14 | 2.98  | 0.78 |
| 7  | 0  | 14  | 3.40  | 0.70 |
| -7 | 0  | -14 | 2.21  | 0.71 |
| -7 | 0  | -14 | 1.77  | 0.89 |
| -7 | 0  | -14 | 3.48  | 0.74 |
| -8 | 0  | -14 | 1.48  | 0.37 |
| -8 | 0  | -14 | 2.33  | 0.56 |
| -8 | 0  | -14 | 2.55  | 0.66 |
| 0  | -1 | -14 | -0.29 | 0.93 |
| 0  | 1  | 14  | 0.33  | 0.46 |
| 0  | 1  | -14 | 2.32  | 1.13 |
| 0  | 1  | -14 | 0.74  | 0.88 |
| 0  | 1  | 14  | 0.80  | 0.76 |
| 0  | -1 | 14  | 0.16  | 0.66 |
| 0  | -1 | -14 | -1.69 | 1.05 |
| 0  | 1  | 14  | 0.29  | 0.50 |
| 0  | -1 | 14  | -0.20 | 0.60 |
| 1  | -1 | 14  | 18.26 | 1.28 |
| -1 | 1  | 14  | 15.77 | 1.28 |
| 1  | -1 | 14  | 17.25 | 1.19 |
| -1 | 1  | 14  | 16.48 | 1.16 |
| 1  | 1  | -14 | 18.37 | 1.69 |
| 1  | 1  | -14 | 17.53 | 1.46 |
| -1 | -1 | -14 | 19.40 | 1.69 |
| -1 | -1 | 14  | 18.71 | 1.19 |
| -1 | 1  | -14 | 16.37 | 1.59 |
| -1 | -1 | 14  | 17.03 | 1.20 |
| 1  | -1 | -14 | 14.66 | 1.54 |
| 1  | -1 | -14 | 18.00 | 1.81 |
| 1  | 1  | 14  | 17.30 | 1.25 |
| -1 | -1 | 14  | 17.77 | 1.24 |
| 1  | 1  | 14  | 19.73 | 1.23 |
| 2  | 1  | -14 | 10.04 | 1.77 |
| -2 | 1  | 14  | 15.77 | 1.29 |

## CIF S3

|    |    |     |       |      |
|----|----|-----|-------|------|
| 2  | 1  | -14 | 12.75 | 1.34 |
| 2  | -1 | 14  | 17.60 | 1.17 |
| -2 | 1  | 14  | 16.46 | 1.23 |
| -2 | 1  | 14  | 15.75 | 1.07 |
| 2  | -1 | 14  | 17.19 | 1.40 |
| 2  | 1  | 14  | 17.22 | 1.21 |
| 2  | -1 | -14 | 18.38 | 1.54 |
| 2  | 1  | 14  | 17.24 | 1.20 |
| -2 | -1 | 14  | 15.70 | 1.24 |
| -2 | -1 | 14  | 16.82 | 1.06 |
| -2 | -1 | 14  | 15.50 | 1.20 |
| 3  | -1 | 14  | 31.10 | 1.91 |
| -3 | -1 | -14 | 31.34 | 2.22 |
| -3 | 1  | 14  | 31.04 | 2.00 |
| 3  | 1  | -14 | 30.88 | 2.04 |
| -3 | 1  | 14  | 32.64 | 1.88 |
| -3 | -1 | 14  | 32.62 | 1.64 |
| 3  | -1 | -14 | 32.79 | 2.13 |
| -3 | -1 | 14  | 25.56 | 1.99 |
| -3 | -1 | 14  | 33.22 | 1.64 |
| 3  | 1  | 14  | 35.38 | 1.96 |
| -3 | -1 | 14  | 34.57 | 1.96 |
| -3 | -1 | 14  | 36.81 | 1.87 |
| -4 | -1 | -14 | 1.50  | 0.93 |
| -4 | 1  | 14  | 3.20  | 0.65 |
| -4 | 1  | 14  | 2.51  | 0.66 |
| -4 | 1  | 14  | 1.88  | 0.36 |
| -4 | 1  | 14  | 2.79  | 0.69 |
| -4 | 1  | 14  | 1.08  | 0.31 |
| 4  | -1 | 14  | 1.55  | 0.65 |
| -4 | 1  | 14  | 2.66  | 0.87 |
| -4 | -1 | -14 | 1.06  | 0.87 |
| -4 | 1  | 14  | 3.11  | 0.61 |
| -4 | -1 | 14  | 2.00  | 0.45 |
| 4  | 1  | 14  | 0.93  | 0.57 |
| -4 | -1 | 14  | 2.59  | 0.80 |
| -4 | 1  | -14 | 2.61  | 0.96 |
| -4 | 1  | -14 | 1.08  | 0.97 |
| -4 | -1 | 14  | 2.28  | 0.47 |
| -4 | -1 | 14  | 3.15  | 0.67 |
| -4 | -1 | 14  | 2.87  | 0.47 |

## CIF S3

|    |    |     |       |      |
|----|----|-----|-------|------|
| -4 | -1 | 14  | 1.49  | 0.41 |
| -5 | 1  | 14  | 10.24 | 0.69 |
| -5 | 1  | 14  | 9.17  | 0.81 |
| -5 | 1  | 14  | 11.36 | 1.24 |
| -5 | 1  | 14  | 10.20 | 0.65 |
| -5 | -1 | -14 | 9.55  | 1.58 |
| -5 | 1  | -14 | 10.24 | 1.53 |
| -5 | -1 | 14  | 9.85  | 0.68 |
| -5 | -1 | 14  | 10.22 | 0.63 |
| 5  | 1  | 14  | 9.47  | 0.80 |
| -5 | -1 | 14  | 10.85 | 1.20 |
| -5 | 1  | -14 | 9.85  | 1.44 |
| -6 | 1  | 14  | 13.80 | 0.76 |
| -6 | 1  | 14  | 13.58 | 0.77 |
| -6 | -1 | -14 | 11.10 | 1.12 |
| -6 | -1 | -14 | 10.11 | 1.26 |
| -6 | -1 | -14 | 14.57 | 1.64 |
| -6 | 1  | -14 | 14.70 | 1.64 |
| 6  | 1  | 14  | 13.38 | 0.90 |
| -6 | -1 | 14  | 13.25 | 0.68 |
| -6 | -1 | 14  | 13.64 | 1.30 |
| -6 | -1 | 14  | 13.19 | 0.68 |
| -6 | 1  | -14 | 12.26 | 1.47 |
| -7 | -1 | -14 | 5.11  | 0.75 |
| -7 | -1 | -14 | 4.81  | 0.79 |
| -7 | -1 | -14 | 4.20  | 1.28 |
| -7 | -1 | -14 | 4.19  | 1.08 |
| 7  | 1  | 14  | 5.45  | 0.57 |
| -7 | 1  | -14 | 4.41  | 0.88 |
| -7 | 1  | -14 | 6.03  | 1.36 |
| -7 | 1  | -14 | 5.94  | 0.76 |
| -7 | 1  | -14 | 6.23  | 1.10 |
| -8 | -1 | -14 | 0.59  | 0.36 |
| -8 | -1 | -14 | 0.31  | 0.45 |
| -8 | -1 | -14 | 0.68  | 0.63 |
| -8 | 1  | -14 | -0.07 | 0.61 |
| 8  | 1  | 14  | 0.77  | 0.30 |
| -8 | 1  | -14 | 0.13  | 0.34 |
| -8 | 1  | -14 | -0.05 | 0.50 |
| 0  | 2  | -14 | 1.79  | 0.94 |
| 0  | -2 | 14  | 1.60  | 0.65 |

## CIF S3

|    |    |     |       |      |
|----|----|-----|-------|------|
| 0  | -2 | -14 | -0.14 | 1.97 |
| 0  | -2 | 14  | 1.44  | 0.72 |
| 0  | -2 | 14  | 1.02  | 0.47 |
| 0  | 2  | 14  | 1.25  | 0.51 |
| 0  | 2  | -14 | 0.71  | 1.03 |
| 0  | 2  | 14  | 0.63  | 0.52 |
| 0  | -2 | -14 | 1.14  | 1.09 |
| 1  | 2  | -14 | 0.94  | 0.97 |
| -1 | 2  | 14  | 0.48  | 0.47 |
| 1  | -2 | 14  | 0.91  | 0.59 |
| 1  | -2 | 14  | 0.88  | 0.53 |
| -1 | -2 | -14 | -1.02 | 1.00 |
| 1  | 2  | -14 | 0.06  | 0.85 |
| -1 | 2  | 14  | 0.43  | 0.59 |
| 1  | 2  | 14  | 1.11  | 0.56 |
| -1 | -2 | 14  | 0.26  | 0.54 |
| 1  | -2 | -14 | 0.01  | 1.17 |
| -1 | 2  | -14 | 1.40  | 0.94 |
| 1  | -2 | -14 | 2.35  | 1.17 |
| 1  | 2  | 14  | 0.62  | 0.56 |
| -1 | -2 | 14  | 0.49  | 0.62 |
| -1 | -2 | 14  | 0.27  | 0.56 |
| -2 | 2  | 14  | 23.40 | 2.07 |
| -2 | 2  | 14  | 25.63 | 1.66 |
| 2  | 2  | -14 | 26.04 | 1.77 |
| 2  | -2 | 14  | 25.21 | 1.58 |
| 2  | -2 | 14  | 24.84 | 1.57 |
| -2 | 2  | 14  | 27.36 | 1.49 |
| -2 | -2 | 14  | 27.04 | 1.46 |
| -2 | -2 | 14  | 25.61 | 1.63 |
| 2  | 2  | 14  | 26.43 | 1.63 |
| 2  | 2  | 14  | 25.03 | 1.62 |
| -2 | -2 | 14  | 26.29 | 1.61 |
| -2 | -2 | 14  | 29.08 | 1.47 |
| 2  | -2 | -14 | 22.23 | 1.96 |
| 3  | 2  | -14 | 5.84  | 1.53 |
| -3 | 2  | 14  | 8.59  | 1.11 |
| -3 | -2 | -14 | 7.74  | 1.35 |
| -3 | 2  | 14  | 7.06  | 0.75 |
| -3 | 2  | 14  | 7.45  | 0.94 |
| 3  | -2 | 14  | 7.37  | 0.88 |



## CIF S3

|    |    |     |      |      |
|----|----|-----|------|------|
| -3 | -2 | 14  | 7.00 | 0.74 |
| 3  | 2  | 14  | 6.12 | 0.87 |
| -3 | -2 | 14  | 8.92 | 0.89 |
| -3 | -2 | 14  | 8.66 | 0.99 |
| 4  | -2 | 14  | 1.41 | 0.60 |
| -4 | 2  | 14  | 3.63 | 0.71 |
| -4 | 2  | 14  | 1.45 | 0.46 |
| 4  | -2 | 14  | 1.65 | 0.42 |
| -4 | 2  | 14  | 2.27 | 0.58 |
| -4 | -2 | -14 | 0.68 | 1.11 |
| -4 | 2  | 14  | 1.99 | 0.80 |
| -4 | -2 | -14 | 0.86 | 0.89 |
| -4 | 2  | 14  | 3.28 | 0.77 |
| -4 | -2 | 14  | 2.90 | 0.65 |
| -4 | -2 | 14  | 3.43 | 0.82 |
| -4 | -2 | 14  | 1.67 | 0.43 |
| -4 | 2  | -14 | 1.51 | 0.90 |
| -4 | 2  | -14 | 3.93 | 1.17 |
| -4 | -2 | 14  | 2.44 | 0.56 |
| -4 | -2 | 14  | 2.23 | 0.48 |
| -4 | 2  | -14 | 2.33 | 1.00 |
| 4  | 2  | 14  | 2.00 | 0.66 |
| -5 | 2  | 14  | 0.72 | 0.42 |
| -5 | 2  | 14  | 0.82 | 0.33 |
| -5 | 2  | 14  | 0.97 | 0.41 |
| -5 | 2  | 14  | 0.91 | 0.32 |
| -5 | -2 | -14 | 1.97 | 1.16 |
| -5 | -2 | 14  | 1.44 | 0.83 |
| -5 | 2  | -14 | 1.92 | 0.93 |
| -5 | -2 | 14  | 1.26 | 0.25 |
| 5  | 2  | 14  | 1.88 | 0.63 |
| -5 | -2 | 14  | 1.44 | 0.38 |
| -5 | 2  | -14 | 0.26 | 0.95 |
| -6 | 2  | 14  | 1.28 | 0.28 |
| -6 | -2 | -14 | 2.15 | 0.49 |
| -6 | -2 | -14 | 1.33 | 0.59 |
| -6 | -2 | -14 | 2.55 | 1.10 |
| -6 | 2  | 14  | 2.07 | 0.43 |
| -6 | 2  | -14 | 2.11 | 0.92 |
| -6 | 2  | -14 | 2.66 | 1.01 |
| -6 | -2 | 14  | 1.97 | 0.78 |

## CIF S3

|    |    |     |       |      |
|----|----|-----|-------|------|
| 6  | 2  | 14  | 1.74  | 0.58 |
| -7 | -2 | -14 | 21.70 | 1.35 |
| -7 | -2 | -14 | 21.95 | 1.66 |
| -7 | -2 | -14 | 20.33 | 1.46 |
| -7 | -2 | -14 | 20.20 | 1.33 |
| 7  | 2  | 14  | 20.63 | 1.17 |
| -7 | 2  | -14 | 22.39 | 1.54 |
| -7 | 2  | -14 | 20.77 | 1.63 |
| -8 | -2 | -14 | 2.08  | 0.53 |
| -8 | -2 | -14 | 1.60  | 0.63 |
| -8 | 2  | -14 | 1.05  | 0.35 |
| -8 | 2  | -14 | 0.95  | 0.50 |
| 8  | 2  | 14  | 1.04  | 0.31 |
| -8 | 2  | -14 | 1.65  | 0.59 |
| 0  | -3 | 14  | 6.28  | 0.79 |
| 0  | 3  | -14 | 6.11  | 1.13 |
| 0  | -3 | 14  | 6.67  | 1.03 |
| 0  | 3  | -14 | 2.62  | 1.10 |
| 0  | 3  | 14  | 5.91  | 0.85 |
| 0  | 3  | 14  | 4.63  | 0.72 |
| 0  | -3 | 14  | 6.76  | 0.80 |
| 0  | -3 | 14  | 5.13  | 0.78 |
| 0  | -3 | -14 | 4.55  | 1.37 |
| 1  | 3  | -14 | -0.21 | 0.78 |
| 1  | -3 | 14  | 0.18  | 0.60 |
| 1  | -3 | 14  | 0.02  | 0.50 |
| -1 | 3  | 14  | 0.90  | 0.49 |
| -1 | 3  | 14  | 0.47  | 0.63 |
| -1 | 3  | -14 | 1.04  | 0.97 |
| -1 | -3 | 14  | 0.06  | 0.66 |
| 1  | -3 | -14 | 0.44  | 1.06 |
| 1  | 3  | 14  | 0.55  | 0.58 |
| 1  | 3  | 14  | -0.12 | 0.54 |
| -1 | -3 | 14  | 0.08  | 0.63 |
| -1 | -3 | 14  | -0.14 | 0.57 |
| -2 | 3  | 14  | 4.26  | 0.73 |
| 2  | -3 | 14  | 7.73  | 0.89 |
| -2 | 3  | 14  | 6.57  | 0.99 |
| 2  | -3 | 14  | 4.69  | 0.85 |
| 2  | 3  | -14 | 6.71  | 1.04 |
| 2  | -3 | -14 | 5.12  | 1.30 |

## CIF S3

|    |    |     |       |      |
|----|----|-----|-------|------|
| 2  | 3  | 14  | 6.76  | 0.85 |
| -2 | -3 | 14  | 6.50  | 0.97 |
| -2 | -3 | 14  | 6.59  | 0.59 |
| -2 | -3 | 14  | 6.06  | 0.89 |
| -3 | 3  | 14  | 0.08  | 0.61 |
| 3  | -3 | 14  | 0.57  | 0.61 |
| -3 | -3 | -14 | 0.34  | 0.94 |
| -3 | 3  | 14  | 0.44  | 0.47 |
| -3 | 3  | 14  | 0.73  | 0.80 |
| 3  | -3 | 14  | 0.64  | 0.71 |
| 3  | 3  | 14  | 0.72  | 0.59 |
| -3 | -3 | 14  | 0.48  | 0.55 |
| -3 | -3 | 14  | 1.05  | 0.49 |
| -3 | -3 | 14  | 0.20  | 0.76 |
| -4 | 3  | 14  | 9.99  | 0.93 |
| 4  | -3 | 14  | 9.84  | 1.27 |
| -4 | 3  | 14  | 8.46  | 0.92 |
| -4 | 3  | 14  | 11.49 | 0.99 |
| -4 | -3 | -14 | 6.65  | 1.35 |
| 4  | -3 | 14  | 10.09 | 1.05 |
| -4 | 3  | 14  | 10.03 | 0.91 |
| 4  | 3  | 14  | 9.83  | 1.06 |
| -4 | -3 | 14  | 9.36  | 0.70 |
| -4 | -3 | 14  | 9.53  | 0.64 |
| -4 | 3  | -14 | 12.62 | 1.55 |
| -4 | -3 | 14  | 10.07 | 0.82 |
| -4 | -3 | 14  | 9.03  | 1.18 |
| -4 | 3  | -14 | 8.79  | 1.27 |
| -4 | -3 | 14  | 10.38 | 0.79 |
| -4 | 3  | -14 | 10.12 | 1.36 |
| -5 | 3  | 14  | 9.94  | 0.85 |
| -5 | 3  | 14  | 9.89  | 0.77 |
| -5 | -3 | -14 | 10.15 | 1.60 |
| -5 | 3  | 14  | 10.63 | 0.81 |
| -5 | 3  | 14  | 10.35 | 0.90 |
| -5 | 3  | 14  | 10.95 | 0.79 |
| -5 | 3  | -14 | 9.86  | 1.41 |
| -5 | 3  | -14 | 10.17 | 1.29 |
| 5  | 3  | 14  | 10.66 | 1.05 |
| -5 | -3 | 14  | 11.04 | 0.67 |
| 5  | 3  | 14  | 10.70 | 0.85 |

## CIF S3

|    |    |     |       |      |
|----|----|-----|-------|------|
| -5 | -3 | 14  | 10.87 | 1.22 |
| -5 | -3 | 14  | 10.85 | 0.64 |
| -6 | 3  | 14  | 1.03  | 0.30 |
| -6 | -3 | -14 | 0.71  | 0.62 |
| -6 | -3 | -14 | 0.69  | 0.95 |
| -6 | -3 | -14 | 1.07  | 0.39 |
| 6  | 3  | 14  | 1.39  | 0.45 |
| -6 | 3  | -14 | 1.74  | 0.94 |
| -6 | -3 | 14  | 0.61  | 0.75 |
| -6 | 3  | -14 | 1.69  | 0.92 |
| 6  | 3  | 14  | 0.76  | 0.34 |
| -7 | -3 | -14 | 4.12  | 1.11 |
| -7 | 3  | 14  | 1.86  | 0.26 |
| -7 | 3  | 14  | 1.73  | 0.25 |
| -7 | -3 | -14 | 1.85  | 0.51 |
| -7 | -3 | -14 | 0.85  | 0.45 |
| -7 | 3  | -14 | 2.69  | 0.77 |
| -7 | 3  | -14 | 2.81  | 0.83 |
| 7  | 3  | 14  | 3.03  | 0.50 |
| 7  | 3  | 14  | 2.90  | 0.59 |
| -8 | -3 | -14 | 3.44  | 0.82 |
| -8 | -3 | -14 | 4.27  | 0.55 |
| -8 | 3  | -14 | 4.18  | 0.56 |
| 8  | 3  | 14  | 3.88  | 0.47 |
| 0  | -4 | 14  | 7.27  | 0.86 |
| 0  | 4  | 14  | 6.13  | 0.78 |
| 0  | -4 | 14  | 6.99  | 0.82 |
| 0  | 4  | 14  | 6.62  | 0.88 |
| 0  | -4 | 14  | 8.12  | 1.05 |
| 0  | 4  | -14 | 3.54  | 1.06 |
| 0  | -4 | 14  | 6.18  | 0.81 |
| 0  | -4 | -14 | 5.14  | 1.43 |
| 1  | -4 | 14  | 7.02  | 0.97 |
| 1  | 4  | -14 | 5.96  | 1.08 |
| -1 | 4  | 14  | 7.74  | 0.84 |
| 1  | -4 | 14  | 4.85  | 1.07 |
| -1 | -4 | 14  | 7.59  | 1.02 |
| -1 | -4 | 14  | 7.54  | 0.98 |
| 1  | -4 | -14 | 5.23  | 1.44 |
| -1 | 4  | -14 | 5.98  | 1.24 |
| 1  | 4  | 14  | 5.98  | 0.85 |

## CIF S3

|    |    |     |      |      |
|----|----|-----|------|------|
| -1 | -4 | 14  | 6.81 | 0.75 |
| 1  | 4  | 14  | 5.68 | 0.95 |
| 2  | -4 | 14  | 4.73 | 0.84 |
| -2 | 4  | 14  | 6.57 | 0.84 |
| -2 | 4  | 14  | 6.43 | 0.99 |
| 2  | -4 | 14  | 7.25 | 1.01 |
| -2 | -4 | 14  | 7.46 | 0.98 |
| -2 | -4 | 14  | 6.36 | 0.89 |
| 2  | 4  | 14  | 6.28 | 0.84 |
| -2 | -4 | 14  | 5.75 | 0.54 |
| -3 | 4  | 14  | 4.44 | 0.92 |
| -3 | 4  | 14  | 3.72 | 0.89 |
| -3 | 4  | 14  | 4.32 | 0.83 |
| -3 | 4  | 14  | 4.50 | 0.85 |
| 3  | -4 | 14  | 4.22 | 1.21 |
| 3  | -4 | 14  | 3.71 | 0.96 |
| 3  | -4 | 14  | 4.28 | 0.87 |
| -3 | 4  | 14  | 3.30 | 0.71 |
| 3  | -4 | 14  | 3.55 | 0.80 |
| -3 | -4 | -14 | 3.98 | 1.14 |
| -3 | -4 | 14  | 3.45 | 0.90 |
| -3 | -4 | 14  | 5.64 | 0.83 |
| -3 | -4 | 14  | 4.49 | 0.71 |
| 3  | 4  | 14  | 5.00 | 0.91 |
| -3 | -4 | 14  | 3.94 | 0.75 |
| -3 | -4 | 14  | 6.45 | 0.69 |
| -3 | -4 | 14  | 5.03 | 0.60 |
| -4 | 4  | 14  | 7.64 | 0.87 |
| -4 | 4  | 14  | 7.30 | 0.90 |
| 4  | -4 | 14  | 8.89 | 1.25 |
| -4 | 4  | 14  | 6.66 | 0.92 |
| -4 | -4 | -14 | 7.16 | 0.99 |
| -4 | -4 | 14  | 7.72 | 1.12 |
| 4  | 4  | 14  | 7.16 | 0.83 |
| -4 | 4  | -14 | 7.92 | 1.24 |
| -4 | -4 | 14  | 6.98 | 0.70 |
| -4 | -4 | 14  | 7.51 | 0.60 |
| -4 | -4 | 14  | 7.21 | 0.51 |
| -4 | 4  | -14 | 7.55 | 1.47 |
| -5 | 4  | 14  | 1.34 | 0.54 |
| -5 | 4  | 14  | 2.12 | 0.53 |

## CIF S3

|    |    |     |       |      |
|----|----|-----|-------|------|
| -5 | 4  | 14  | 2.07  | 0.59 |
| -5 | 4  | 14  | 2.45  | 0.60 |
| -5 | 4  | 14  | 3.10  | 0.71 |
| -5 | -4 | -14 | 3.31  | 1.06 |
| -5 | -4 | 14  | 2.51  | 0.39 |
| -5 | 4  | -14 | 2.59  | 0.98 |
| -5 | -4 | 14  | 4.46  | 1.00 |
| 5  | 4  | 14  | 2.45  | 0.65 |
| -5 | 4  | -14 | 2.50  | 0.89 |
| -5 | -4 | 14  | 2.32  | 0.38 |
| 5  | 4  | 14  | 1.66  | 0.49 |
| -5 | -4 | 14  | 2.31  | 0.37 |
| -6 | -4 | -14 | 3.30  | 0.91 |
| -6 | -4 | -14 | 3.39  | 0.85 |
| -6 | 4  | 14  | 4.49  | 0.85 |
| -6 | -4 | -14 | 4.97  | 0.85 |
| -6 | 4  | 14  | 4.11  | 0.53 |
| -6 | -4 | -14 | 4.01  | 0.60 |
| -6 | 4  | -14 | 5.42  | 1.28 |
| -6 | 4  | -14 | 3.96  | 0.94 |
| 6  | 4  | 14  | 4.15  | 0.72 |
| 6  | 4  | 14  | 3.75  | 0.62 |
| -7 | 4  | 14  | 6.33  | 0.42 |
| -7 | 4  | 14  | 5.52  | 0.43 |
| -7 | -4 | -14 | 5.94  | 1.10 |
| -7 | -4 | -14 | 6.84  | 0.73 |
| -7 | 4  | 14  | 5.95  | 0.44 |
| -7 | -4 | -14 | 7.74  | 0.77 |
| -7 | 4  | -14 | 6.39  | 1.02 |
| -7 | 4  | -14 | 7.85  | 1.08 |
| 7  | 4  | 14  | 5.69  | 0.63 |
| 7  | 4  | 14  | 6.21  | 0.76 |
| 0  | -5 | 14  | 18.59 | 1.28 |
| 0  | -5 | 14  | 18.89 | 1.20 |
| 0  | -5 | 14  | 17.69 | 1.38 |
| 0  | 5  | 14  | 16.36 | 1.25 |
| 0  | -5 | 14  | 19.22 | 1.27 |
| 0  | 5  | 14  | 20.38 | 1.32 |
| 1  | -5 | 14  | 3.07  | 1.04 |
| 1  | -5 | 14  | 1.67  | 0.68 |
| -1 | 5  | 14  | 1.00  | 0.53 |

## CIF S3

|    |    |     |       |      |
|----|----|-----|-------|------|
| 1  | -5 | 14  | 1.87  | 0.64 |
| 1  | -5 | 14  | 0.99  | 0.65 |
| -1 | -5 | 14  | 0.61  | 0.72 |
| 1  | 5  | 14  | 0.32  | 0.54 |
| -1 | -5 | 14  | 1.62  | 0.52 |
| -1 | -5 | 14  | 0.50  | 0.64 |
| 1  | 5  | 14  | 1.02  | 0.59 |
| 2  | -5 | 14  | 11.26 | 1.02 |
| -2 | 5  | 14  | 11.17 | 0.97 |
| 2  | -5 | 14  | 8.18  | 1.03 |
| 2  | -5 | 14  | 9.17  | 1.61 |
| -2 | 5  | 14  | 11.12 | 1.12 |
| 2  | -5 | 14  | 11.85 | 1.19 |
| -2 | 5  | 14  | 10.74 | 1.09 |
| 2  | -5 | 14  | 9.79  | 1.29 |
| -2 | 5  | 14  | 10.79 | 1.16 |
| -2 | 5  | 14  | 11.31 | 1.09 |
| -2 | -5 | -14 | 8.73  | 1.52 |
| -2 | 5  | 14  | 10.49 | 1.05 |
| -2 | -5 | 14  | 11.61 | 1.06 |
| -2 | -5 | 14  | 10.85 | 1.08 |
| -2 | -5 | 14  | 11.41 | 1.00 |
| 2  | 5  | 14  | 12.36 | 1.07 |
| -3 | -5 | -14 | 22.94 | 1.68 |
| -3 | 5  | 14  | 22.77 | 1.46 |
| -3 | 5  | 14  | 22.40 | 1.50 |
| -3 | 5  | 14  | 22.38 | 1.45 |
| -3 | -5 | -14 | 19.51 | 2.09 |
| 3  | -5 | 14  | 23.10 | 1.75 |
| -3 | 5  | 14  | 22.46 | 1.49 |
| -3 | 5  | 14  | 21.31 | 1.52 |
| -3 | 5  | 14  | 23.02 | 1.39 |
| 3  | -5 | 14  | 22.29 | 1.54 |
| 3  | -5 | 14  | 22.78 | 1.60 |
| -3 | -5 | 14  | 23.94 | 1.52 |
| -3 | -5 | 14  | 20.58 | 1.41 |
| -3 | -5 | 14  | 22.15 | 1.28 |
| 3  | 5  | 14  | 22.60 | 1.40 |
| -3 | -5 | 14  | 23.14 | 1.35 |
| 3  | 5  | 14  | 21.67 | 1.55 |
| -3 | -5 | 14  | 22.21 | 1.33 |

## CIF S3

|    |    |     |       |      |
|----|----|-----|-------|------|
| -4 | -5 | -14 | 0.98  | 0.52 |
| -4 | 5  | 14  | 0.43  | 0.49 |
| -4 | 5  | 14  | 1.15  | 0.50 |
| -4 | 5  | 14  | 0.36  | 0.61 |
| 4  | -5 | 14  | 0.70  | 0.90 |
| -4 | 5  | 14  | 0.44  | 0.50 |
| -4 | -5 | 14  | 0.48  | 0.31 |
| -4 | 5  | -14 | -0.18 | 0.92 |
| -4 | -5 | 14  | 0.86  | 0.16 |
| -4 | -5 | 14  | 0.81  | 0.74 |
| 4  | 5  | 14  | 1.24  | 0.48 |
| -4 | 5  | -14 | 0.93  | 1.01 |
| -5 | -5 | -14 | 0.60  | 0.49 |
| -5 | 5  | 14  | 1.41  | 0.41 |
| -5 | 5  | 14  | 0.61  | 0.38 |
| -5 | 5  | 14  | 0.43  | 0.45 |
| -5 | -5 | 14  | 1.21  | 0.30 |
| -5 | 5  | -14 | 0.65  | 0.88 |
| -5 | 5  | -14 | 1.41  | 0.91 |
| -5 | -5 | 14  | 1.82  | 0.74 |
| 5  | 5  | 14  | 0.88  | 0.44 |
| -5 | -5 | 14  | 1.16  | 0.32 |
| -5 | -5 | 14  | 1.23  | 0.31 |
| -6 | -5 | -14 | 0.39  | 0.59 |
| -6 | 5  | 14  | 0.84  | 0.25 |
| -6 | -5 | -14 | 1.58  | 0.59 |
| -6 | 5  | 14  | 0.96  | 0.33 |
| -6 | 5  | 14  | 0.57  | 0.41 |
| -6 | -5 | -14 | 0.25  | 0.66 |
| -6 | -5 | -14 | 0.27  | 0.82 |
| -6 | 5  | -14 | -0.24 | 0.38 |
| -6 | 5  | -14 | 1.13  | 0.80 |
| 6  | 5  | 14  | 0.70  | 0.40 |
| -6 | 5  | -14 | 0.41  | 0.74 |
| -7 | 5  | 14  | 3.02  | 0.35 |
| -7 | -5 | -14 | 3.88  | 0.64 |
| -7 | -5 | -14 | 2.05  | 0.60 |
| -7 | 5  | 14  | 3.58  | 0.52 |
| -7 | -5 | -14 | 3.23  | 0.74 |
| -7 | 5  | 14  | 3.56  | 0.33 |
| 7  | 5  | 14  | 3.60  | 0.57 |



## CIF S3

|    |    |     |       |      |
|----|----|-----|-------|------|
| -7 | 5  | -14 | 3.24  | 0.96 |
| 0  | 6  | 14  | 0.15  | 0.39 |
| 0  | 6  | 14  | -0.21 | 0.62 |
| 0  | -6 | 14  | 0.32  | 0.49 |
| 0  | -6 | 14  | -0.09 | 0.59 |
| 0  | -6 | 14  | 0.08  | 0.64 |
| 0  | 6  | 14  | 0.45  | 0.67 |
| 0  | -6 | 14  | -0.16 | 0.69 |
| 0  | 6  | 14  | -0.94 | 0.60 |
| 0  | 6  | 14  | -1.16 | 0.50 |
| 0  | -6 | 14  | 0.70  | 0.62 |
| 0  | 6  | 14  | 0.06  | 0.58 |
| 0  | -6 | 14  | -0.31 | 0.74 |
| 0  | -6 | 14  | 0.75  | 0.68 |
| 0  | -6 | 14  | -0.36 | 0.62 |
| 1  | -6 | 14  | 4.12  | 0.97 |
| -1 | 6  | 14  | 2.69  | 0.75 |
| 1  | -6 | 14  | 2.07  | 0.78 |
| 1  | -6 | 14  | 3.08  | 0.91 |
| 1  | -6 | 14  | 1.80  | 0.66 |
| -1 | 6  | 14  | 2.21  | 0.71 |
| 1  | -6 | 14  | 1.40  | 0.67 |
| -1 | 6  | 14  | 0.91  | 0.66 |
| 1  | -6 | 14  | 1.97  | 0.97 |
| -1 | 6  | 14  | 1.84  | 0.49 |
| 1  | -6 | 14  | 2.81  | 0.67 |
| 1  | 6  | 14  | 2.15  | 0.74 |
| -1 | -6 | 14  | 1.93  | 0.74 |
| -1 | -6 | 14  | 1.88  | 0.55 |
| -1 | -6 | 14  | 1.90  | 0.64 |
| -1 | -6 | 14  | 2.70  | 0.59 |
| 1  | 6  | 14  | 1.00  | 0.58 |
| 1  | 6  | 14  | 0.38  | 0.59 |
| -1 | -6 | 14  | 1.36  | 0.62 |
| -1 | -6 | 14  | 1.83  | 0.79 |
| -2 | 6  | 14  | 1.57  | 0.61 |
| 2  | -6 | 14  | 2.06  | 0.68 |
| -2 | 6  | 14  | 3.49  | 0.98 |
| -2 | -6 | -14 | 1.26  | 1.55 |
| 2  | -6 | 14  | 3.03  | 0.78 |
| -2 | -6 | -14 | 4.19  | 0.97 |

## CIF S3

|    |    |     |      |      |
|----|----|-----|------|------|
| 2  | -6 | 14  | 1.83 | 0.79 |
| -2 | 6  | 14  | 2.52 | 0.65 |
| 2  | -6 | 14  | 2.72 | 0.84 |
| -2 | 6  | 14  | 4.27 | 0.85 |
| -2 | 6  | 14  | 3.57 | 0.93 |
| 2  | -6 | 14  | 1.68 | 0.55 |
| 2  | -6 | 14  | 2.31 | 0.99 |
| 2  | 6  | 14  | 1.79 | 0.66 |
| -2 | -6 | 14  | 4.08 | 0.83 |
| -2 | -6 | 14  | 2.81 | 0.54 |
| -2 | -6 | 14  | 3.69 | 0.96 |
| 2  | 6  | 14  | 2.82 | 0.76 |
| -3 | -6 | -14 | 2.46 | 0.70 |
| -3 | 6  | 14  | 1.62 | 0.60 |
| 3  | -6 | 14  | 1.44 | 0.75 |
| 3  | -6 | 14  | 1.23 | 0.68 |
| -3 | 6  | 14  | 1.70 | 0.66 |
| 3  | -6 | 14  | 0.70 | 0.41 |
| -3 | 6  | 14  | 1.76 | 0.59 |
| 3  | -6 | 14  | 0.42 | 1.05 |
| -3 | 6  | 14  | 2.22 | 0.71 |
| -3 | 6  | 14  | 1.58 | 0.58 |
| -3 | 6  | 14  | 0.87 | 0.55 |
| -3 | -6 | 14  | 1.02 | 0.45 |
| -3 | -6 | 14  | 1.64 | 0.57 |
| -3 | -6 | 14  | 2.00 | 0.77 |
| 3  | 6  | 14  | 0.44 | 0.51 |
| -3 | -6 | 14  | 2.00 | 0.44 |
| -3 | -6 | 14  | 1.28 | 0.40 |
| -4 | 6  | 14  | 1.82 | 0.98 |
| -4 | 6  | 14  | 1.73 | 0.50 |
| -4 | 6  | 14  | 2.18 | 0.57 |
| -4 | 6  | 14  | 2.40 | 0.54 |
| -4 | 6  | 14  | 3.18 | 0.83 |
| 4  | -6 | 14  | 2.06 | 1.03 |
| 4  | -6 | 14  | 3.52 | 1.01 |
| -4 | 6  | -14 | 3.01 | 1.04 |
| -4 | -6 | 14  | 2.98 | 0.48 |
| -4 | 6  | -14 | 4.00 | 0.88 |
| 4  | 6  | 14  | 3.19 | 0.79 |
| -4 | -6 | 14  | 3.32 | 0.82 |

## CIF S3

|    |    |     |       |      |
|----|----|-----|-------|------|
| -5 | 6  | 14  | 1.83  | 0.44 |
| -5 | -6 | -14 | 1.90  | 0.92 |
| -5 | 6  | 14  | 2.24  | 0.52 |
| -5 | -6 | -14 | 2.14  | 1.07 |
| -5 | 6  | 14  | 1.39  | 0.43 |
| -5 | -6 | -14 | 1.91  | 0.47 |
| -5 | -6 | 14  | 2.87  | 0.32 |
| 5  | 6  | 14  | 3.16  | 0.71 |
| -5 | -6 | 14  | 2.77  | 0.30 |
| -5 | 6  | -14 | 1.61  | 0.85 |
| -5 | 6  | -14 | 1.42  | 0.85 |
| -6 | -6 | -14 | 3.97  | 0.84 |
| -6 | -6 | -14 | 3.93  | 0.77 |
| -6 | 6  | 14  | 4.17  | 0.45 |
| -6 | 6  | 14  | 2.23  | 0.54 |
| -6 | 6  | 14  | 3.20  | 0.64 |
| -6 | 6  | -14 | 4.05  | 0.75 |
| 6  | 6  | 14  | 4.14  | 0.63 |
| -6 | 6  | -14 | 2.19  | 0.76 |
| -7 | 6  | 14  | 0.66  | 0.18 |
| -7 | -6 | -14 | 1.10  | 0.39 |
| -7 | -6 | -14 | -0.29 | 0.45 |
| -7 | 6  | 14  | 1.12  | 0.29 |
| 7  | 6  | 14  | 0.99  | 0.31 |
| -7 | 6  | -14 | 0.89  | 0.52 |
| 0  | 7  | 14  | 4.50  | 0.93 |
| 0  | -7 | 14  | 3.41  | 0.81 |
| 0  | -7 | 14  | 3.77  | 0.66 |
| 0  | -7 | 14  | 4.72  | 0.88 |
| 0  | -7 | 14  | 3.72  | 0.95 |
| 0  | -7 | 14  | 2.58  | 0.83 |
| 0  | 7  | 14  | 4.50  | 0.68 |
| 0  | 7  | 14  | 4.76  | 1.03 |
| 0  | -7 | 14  | 4.28  | 0.68 |
| 0  | -7 | 14  | 4.64  | 0.97 |
| 0  | -7 | 14  | 5.37  | 0.83 |
| 0  | 7  | 14  | 3.14  | 0.75 |
| -1 | 7  | 14  | 5.25  | 1.02 |
| 1  | -7 | 14  | 6.37  | 0.92 |
| 1  | -7 | 14  | 5.10  | 1.04 |
| 1  | -7 | 14  | 5.02  | 0.92 |

## CIF S3

|    |    |     |      |      |
|----|----|-----|------|------|
| 1  | -7 | 14  | 7.01 | 1.00 |
| -1 | 7  | 14  | 5.16 | 0.89 |
| -1 | 7  | 14  | 5.31 | 1.05 |
| 1  | -7 | 14  | 7.00 | 1.12 |
| 1  | -7 | 14  | 5.37 | 1.00 |
| 1  | -7 | 14  | 4.16 | 0.93 |
| -1 | 7  | 14  | 5.75 | 0.54 |
| 1  | 7  | 14  | 5.13 | 0.81 |
| 1  | 7  | 14  | 5.46 | 1.02 |
| -1 | -7 | 14  | 4.38 | 0.91 |
| -1 | -7 | 14  | 5.16 | 0.87 |
| -1 | -7 | 14  | 3.61 | 0.87 |
| -1 | -7 | 14  | 4.97 | 0.96 |
| -1 | -7 | 14  | 4.86 | 0.77 |
| -1 | -7 | 14  | 5.42 | 0.94 |
| 2  | -7 | 14  | 2.39 | 0.75 |
| -2 | -7 | -14 | 1.03 | 0.79 |
| -2 | 7  | 14  | 1.73 | 0.64 |
| 2  | -7 | 14  | 0.70 | 0.50 |
| -2 | 7  | 14  | 0.99 | 0.72 |
| 2  | -7 | 14  | 1.61 | 0.91 |
| -2 | 7  | 14  | 0.98 | 0.61 |
| 2  | -7 | 14  | 1.60 | 0.68 |
| 2  | -7 | 14  | 2.01 | 0.74 |
| -2 | 7  | 14  | 0.82 | 0.58 |
| 2  | -7 | 14  | 2.47 | 0.75 |
| 2  | -7 | 14  | 1.46 | 0.73 |
| -2 | -7 | 14  | 1.87 | 0.51 |
| -2 | -7 | 14  | 2.53 | 0.66 |
| -2 | -7 | 14  | 0.47 | 0.65 |
| -2 | -7 | 14  | 0.14 | 0.62 |
| 2  | 7  | 14  | 1.40 | 0.57 |
| -3 | 7  | 14  | 2.03 | 0.66 |
| -3 | 7  | 14  | 0.78 | 0.58 |
| 3  | -7 | 14  | 0.48 | 0.39 |
| -3 | 7  | 14  | 1.73 | 0.60 |
| -3 | 7  | 14  | 1.22 | 0.63 |
| -3 | 7  | 14  | 2.02 | 0.78 |
| 3  | -7 | 14  | 1.67 | 0.75 |
| 3  | -7 | 14  | 1.95 | 0.69 |
| -3 | -7 | -14 | 2.62 | 0.73 |

## CIF S3

|    |    |     |      |      |
|----|----|-----|------|------|
| 3  | -7 | 14  | 1.86 | 0.99 |
| 3  | -7 | 14  | 1.87 | 0.92 |
| -3 | 7  | 14  | 0.98 | 0.54 |
| 3  | 7  | 14  | 1.17 | 0.54 |
| -3 | -7 | 14  | 1.54 | 0.39 |
| -3 | -7 | 14  | 1.68 | 0.75 |
| -3 | -7 | 14  | 1.75 | 0.41 |
| -3 | -7 | 14  | 2.34 | 0.86 |
| -3 | -7 | 14  | 1.34 | 0.47 |
| -4 | 7  | 14  | 4.97 | 0.91 |
| -4 | 7  | 14  | 6.10 | 0.84 |
| 4  | -7 | 14  | 6.38 | 1.03 |
| -4 | 7  | 14  | 5.94 | 0.77 |
| -4 | 7  | 14  | 6.26 | 0.71 |
| 4  | 7  | 14  | 6.68 | 0.79 |
| -4 | -7 | 14  | 6.86 | 0.97 |
| -4 | 7  | -14 | 5.10 | 1.18 |
| -4 | -7 | 14  | 6.43 | 0.74 |
| -4 | 7  | -14 | 5.98 | 1.37 |
| -4 | -7 | 14  | 5.72 | 0.55 |
| -5 | -7 | -14 | 5.21 | 1.20 |
| -5 | 7  | 14  | 3.33 | 0.61 |
| -5 | 7  | 14  | 2.99 | 0.78 |
| -5 | -7 | -14 | 2.29 | 0.56 |
| -5 | 7  | 14  | 3.08 | 0.66 |
| 5  | 7  | 14  | 2.25 | 0.49 |
| -5 | 7  | -14 | 2.22 | 0.78 |
| -6 | 7  | 14  | 2.19 | 0.53 |
| -6 | -7 | -14 | 0.90 | 0.47 |
| -6 | -7 | -14 | 0.70 | 0.41 |
| -6 | 7  | 14  | 2.41 | 0.38 |
| -6 | 7  | 14  | 2.06 | 0.45 |
| -6 | 7  | -14 | 2.33 | 0.54 |
| -6 | 7  | -14 | 2.42 | 0.69 |
| 6  | 7  | 14  | 0.88 | 0.36 |
| 0  | -8 | 14  | 1.54 | 0.61 |
| 0  | 8  | 14  | 2.25 | 0.62 |
| 0  | 8  | 14  | 1.16 | 0.39 |
| 0  | -8 | 14  | 0.97 | 0.60 |
| 0  | -8 | 14  | 1.89 | 0.77 |
| 0  | -8 | 14  | 1.04 | 0.66 |

## CIF S3

|    |    |     |      |      |
|----|----|-----|------|------|
| 0  | 8  | 14  | 0.84 | 0.63 |
| 0  | -8 | 14  | 0.86 | 0.67 |
| 0  | -8 | 14  | 1.21 | 0.60 |
| 0  | 8  | 14  | 1.17 | 0.77 |
| 0  | -8 | 14  | 1.26 | 0.75 |
| 0  | -8 | 14  | 0.42 | 0.60 |
| -1 | -8 | -14 | 1.43 | 0.79 |
| 1  | -8 | 14  | 1.89 | 0.65 |
| -1 | 8  | 14  | 0.82 | 0.24 |
| 1  | -8 | 14  | 0.58 | 0.67 |
| 1  | -8 | 14  | 3.63 | 0.80 |
| -1 | 8  | 14  | 1.32 | 0.69 |
| 1  | -8 | 14  | 2.05 | 0.80 |
| 1  | -8 | 14  | 2.00 | 0.63 |
| 1  | -8 | 14  | 1.08 | 0.66 |
| 1  | -8 | 14  | 2.67 | 0.72 |
| -1 | 8  | 14  | 0.30 | 0.11 |
| -1 | 8  | 14  | 1.12 | 0.63 |
| 1  | -8 | 14  | 1.24 | 0.70 |
| -1 | 8  | 14  | 0.67 | 0.70 |
| -1 | -8 | 14  | 1.16 | 0.69 |
| -1 | -8 | 14  | 0.27 | 0.55 |
| -1 | -8 | 14  | 0.38 | 0.67 |
| -1 | -8 | 14  | 1.41 | 0.56 |
| -1 | -8 | 14  | 0.91 | 0.50 |
| -1 | -8 | 14  | 0.83 | 0.56 |
| 1  | 8  | 14  | 0.81 | 0.69 |
| 1  | 8  | 14  | 1.06 | 0.53 |
| 2  | -8 | 14  | 6.66 | 0.99 |
| -2 | -8 | -14 | 6.45 | 0.95 |
| -2 | 8  | 14  | 7.28 | 1.01 |
| -2 | 8  | 14  | 5.77 | 1.32 |
| 2  | -8 | 14  | 5.20 | 1.17 |
| 2  | -8 | 14  | 7.59 | 0.96 |
| 2  | -8 | 14  | 6.83 | 0.93 |
| 2  | -8 | 14  | 5.49 | 1.05 |
| -2 | 8  | 14  | 5.77 | 0.96 |
| 2  | -8 | 14  | 7.14 | 0.91 |
| -2 | 8  | 14  | 6.33 | 1.01 |
| 2  | -8 | 14  | 6.31 | 1.42 |
| -2 | -8 | 14  | 6.74 | 0.96 |

## CIF S3

|    |    |     |       |      |
|----|----|-----|-------|------|
| -2 | -8 | 14  | 6.13  | 0.85 |
| -2 | -8 | 14  | 6.39  | 0.79 |
| 2  | 8  | 14  | 5.52  | 0.80 |
| -3 | 8  | 14  | 14.60 | 1.14 |
| -3 | 8  | 14  | 12.91 | 1.00 |
| 3  | -8 | 14  | 12.74 | 1.10 |
| -3 | 8  | 14  | 12.70 | 1.18 |
| 3  | -8 | 14  | 13.90 | 1.24 |
| 3  | -8 | 14  | 13.13 | 1.25 |
| 3  | -8 | 14  | 12.44 | 1.17 |
| -3 | 8  | 14  | 12.56 | 1.13 |
| -3 | 8  | 14  | 12.41 | 1.05 |
| -3 | 8  | 14  | 13.33 | 2.15 |
| -3 | -8 | 14  | 13.38 | 0.97 |
| -3 | -8 | 14  | 14.43 | 1.15 |
| -3 | -8 | 14  | 12.04 | 0.90 |
| -3 | -8 | 14  | 12.27 | 0.88 |
| 3  | 8  | 14  | 11.87 | 1.04 |
| -4 | 8  | 14  | 1.55  | 0.53 |
| -4 | 8  | 14  | 3.55  | 0.66 |
| 4  | -8 | 14  | 3.54  | 0.91 |
| -4 | 8  | 14  | 3.88  | 0.68 |
| -4 | -8 | -14 | 1.97  | 0.51 |
| -4 | 8  | 14  | 4.38  | 0.80 |
| -4 | -8 | 14  | 3.84  | 0.49 |
| -4 | 8  | -14 | 2.36  | 0.71 |
| -4 | 8  | -14 | 4.44  | 1.16 |
| 4  | 8  | 14  | 4.12  | 0.73 |
| -4 | -8 | 14  | 4.56  | 0.51 |
| -5 | 8  | 14  | 0.73  | 0.45 |
| -5 | 8  | 14  | 1.99  | 0.42 |
| -5 | -8 | -14 | 2.10  | 0.58 |
| -5 | 8  | 14  | 3.87  | 0.60 |
| -5 | -8 | -14 | 1.20  | 0.52 |
| 5  | 8  | 14  | 3.01  | 0.64 |
| -5 | 8  | -14 | 1.83  | 0.67 |
| -6 | 8  | 14  | 2.46  | 0.46 |
| -6 | 8  | 14  | 3.89  | 0.29 |
| -6 | -8 | -14 | 2.35  | 0.62 |
| 6  | 8  | 14  | 3.13  | 0.53 |
| -6 | 8  | -14 | 3.11  | 0.42 |

## CIF S3

|    |    |     |       |      |
|----|----|-----|-------|------|
| -6 | 8  | -14 | 3.90  | 0.79 |
| 0  | -9 | 14  | -0.13 | 0.52 |
| 0  | -9 | 14  | -0.21 | 0.58 |
| 0  | -9 | 14  | -0.23 | 0.53 |
| 0  | 9  | 14  | 0.37  | 0.61 |
| 0  | 9  | 14  | 0.60  | 0.60 |
| 0  | -9 | -14 | 0.09  | 0.75 |
| 0  | -9 | 14  | -0.15 | 0.56 |
| 0  | -9 | 14  | 1.14  | 0.58 |
| 0  | 9  | 14  | 0.24  | 0.36 |
| 0  | -9 | 14  | 0.42  | 0.64 |
| 0  | 9  | 14  | 0.34  | 0.76 |
| 1  | -9 | 14  | 1.23  | 0.60 |
| -1 | -9 | -14 | 0.92  | 0.62 |
| -1 | 9  | 14  | 1.33  | 0.66 |
| 1  | -9 | 14  | 0.61  | 0.61 |
| 1  | -9 | 14  | 0.13  | 0.45 |
| -1 | 9  | 14  | 0.60  | 0.53 |
| 1  | -9 | 14  | 0.81  | 0.60 |
| -1 | 9  | 14  | 0.73  | 0.63 |
| 1  | -9 | 14  | 0.61  | 0.47 |
| 1  | -9 | 14  | 0.91  | 0.58 |
| -1 | 9  | 14  | 0.56  | 0.68 |
| 1  | -9 | 14  | 1.69  | 0.64 |
| 1  | -9 | 14  | 0.42  | 0.59 |
| -1 | -9 | 14  | 0.30  | 0.60 |
| 1  | 9  | 14  | 0.68  | 0.56 |
| -1 | -9 | 14  | 0.49  | 0.56 |
| -1 | -9 | 14  | 0.35  | 0.54 |
| -1 | -9 | 14  | 1.53  | 0.52 |
| 1  | 9  | 14  | -0.47 | 0.75 |
| -1 | -9 | 14  | 0.80  | 0.50 |
| -2 | 9  | 14  | 6.14  | 0.92 |
| 2  | -9 | 14  | 1.43  | 0.72 |
| 2  | -9 | 14  | 6.06  | 0.87 |
| -2 | 9  | 14  | 4.16  | 0.86 |
| 2  | -9 | 14  | 4.95  | 0.99 |
| -2 | 9  | 14  | 4.59  | 0.95 |
| 2  | -9 | 14  | 4.47  | 1.16 |
| 2  | -9 | 14  | 3.83  | 0.93 |
| 2  | -9 | 14  | 4.34  | 0.80 |



## CIF S3

|    |     |     |       |      |
|----|-----|-----|-------|------|
| 2  | 9   | 14  | 5.07  | 0.78 |
| -2 | -9  | 14  | 4.15  | 0.74 |
| -2 | -9  | 14  | 4.21  | 0.76 |
| -2 | -9  | 14  | 4.32  | 0.84 |
| -3 | 9   | 14  | -0.34 | 0.60 |
| 3  | -9  | 14  | 1.22  | 0.65 |
| -3 | 9   | 14  | 0.23  | 0.63 |
| 3  | -9  | 14  | 0.88  | 0.63 |
| -3 | 9   | 14  | 1.43  | 0.54 |
| -3 | 9   | 14  | 1.66  | 0.51 |
| -3 | 9   | 14  | 0.38  | 0.50 |
| 3  | -9  | 14  | 0.52  | 0.53 |
| -3 | 9   | 14  | 1.48  | 0.53 |
| -3 | -9  | -14 | 0.13  | 0.50 |
| 3  | -9  | 14  | 0.41  | 0.60 |
| 3  | 9   | 14  | 0.81  | 0.46 |
| -3 | -9  | 14  | 1.20  | 0.28 |
| -3 | 9   | -14 | 2.88  | 0.76 |
| -3 | -9  | 14  | 0.56  | 0.35 |
| -3 | -9  | 14  | 0.58  | 0.42 |
| -4 | 9   | 14  | 4.97  | 0.79 |
| -4 | -9  | -14 | 5.09  | 0.55 |
| -4 | 9   | 14  | 5.10  | 0.74 |
| -4 | 9   | 14  | 5.66  | 0.68 |
| 4  | -9  | 14  | 3.94  | 0.88 |
| 4  | 9   | 14  | 5.48  | 0.69 |
| -4 | -9  | 14  | 5.46  | 0.47 |
| -4 | -9  | 14  | 6.58  | 0.51 |
| -4 | 9   | -14 | 5.97  | 1.01 |
| 0  | -10 | 14  | 0.94  | 0.64 |
| 0  | -10 | 14  | 0.58  | 0.67 |
| 0  | -10 | 14  | 0.65  | 0.50 |
| 0  | -10 | 14  | 0.19  | 0.51 |
| 0  | -10 | -14 | 1.41  | 0.67 |
| 0  | -10 | 14  | 0.06  | 0.47 |
| 0  | -10 | -14 | -0.44 | 0.60 |
| 0  | 10  | 14  | 0.18  | 0.49 |
| 0  | 10  | 14  | 0.05  | 0.28 |
| 0  | 10  | 14  | 0.14  | 0.61 |
| 0  | -10 | 14  | 1.06  | 0.51 |
| -1 | 10  | 14  | 3.50  | 0.93 |

## CIF S3

|    |     |     |       |      |
|----|-----|-----|-------|------|
| 1  | -10 | 14  | 1.18  | 0.44 |
| -1 | 10  | 14  | 2.20  | 0.80 |
| 1  | -10 | 14  | 2.13  | 0.65 |
| -1 | 10  | 14  | 1.34  | 0.50 |
| 1  | -10 | 14  | 3.12  | 0.77 |
| 1  | -10 | 14  | 2.03  | 0.57 |
| -1 | -10 | -14 | 2.61  | 0.56 |
| 1  | -10 | 14  | 2.57  | 0.58 |
| 1  | -10 | 14  | 1.74  | 0.55 |
| -1 | 10  | 14  | 1.01  | 0.57 |
| 1  | 10  | 14  | 0.96  | 0.49 |
| 1  | -10 | -14 | 1.58  | 0.68 |
| 1  | -10 | -14 | 3.37  | 1.08 |
| -1 | -10 | 14  | 2.16  | 0.49 |
| 1  | 10  | 14  | 1.65  | 0.72 |
| -1 | -10 | 14  | 1.86  | 0.46 |
| -1 | -10 | 14  | 2.35  | 0.66 |
| 1  | 10  | 14  | 1.56  | 0.36 |
| 2  | -10 | 14  | -0.11 | 0.31 |
| -2 | 10  | 14  | -0.12 | 0.53 |
| -2 | 10  | 14  | -0.22 | 0.61 |
| 2  | -10 | 14  | -0.22 | 0.42 |
| -2 | 10  | 14  | -0.56 | 0.47 |
| 2  | -10 | 14  | -0.21 | 0.51 |
| 2  | -10 | 14  | 0.17  | 0.52 |
| 2  | 10  | 14  | 0.01  | 0.44 |
| 2  | -10 | -14 | 2.81  | 0.97 |
| -2 | -10 | 14  | -0.51 | 0.41 |
| -2 | -10 | 14  | -0.09 | 0.38 |
| -3 | 10  | 14  | 1.29  | 0.48 |
| 3  | -10 | 14  | 0.77  | 0.43 |
| -3 | 10  | 14  | 0.30  | 0.44 |
| -3 | -10 | -14 | 0.92  | 0.39 |
| -3 | 10  | 14  | 0.84  | 0.43 |
| 3  | -10 | 14  | 0.48  | 0.55 |
| 3  | -10 | 14  | 0.95  | 0.56 |
| -3 | 10  | 14  | 0.63  | 0.58 |
| -3 | 10  | -14 | 0.99  | 0.59 |
| 3  | 10  | 14  | 1.31  | 0.45 |
| -3 | -10 | 14  | 0.87  | 0.34 |
| 3  | -10 | -14 | 3.39  | 0.89 |

## CIF S3

|    |     |     |       |      |
|----|-----|-----|-------|------|
| -3 | -10 | 14  | 0.55  | 0.31 |
| 4  | -10 | 14  | 0.84  | 0.56 |
| -4 | 10  | 14  | 1.09  | 0.40 |
| -4 | 10  | 14  | 1.80  | 0.50 |
| -4 | 10  | 14  | 3.04  | 0.59 |
| 4  | -10 | 14  | 2.37  | 0.65 |
| -4 | 10  | -14 | 1.71  | 0.49 |
| 4  | 10  | 14  | 3.70  | 0.58 |
| -4 | -10 | 14  | 2.65  | 0.29 |
| -4 | -10 | 14  | 3.24  | 0.27 |
| -4 | -10 | 14  | 3.17  | 0.30 |
| 4  | -10 | -14 | 5.13  | 0.89 |
| 0  | -11 | 14  | 5.52  | 0.62 |
| 0  | 11  | 14  | 4.39  | 0.89 |
| 0  | 11  | 14  | 5.10  | 0.71 |
| 0  | -11 | 14  | 5.45  | 1.02 |
| 0  | -11 | 14  | 4.18  | 0.72 |
| 0  | -11 | 14  | 5.48  | 0.67 |
| 1  | -11 | 14  | 6.67  | 0.86 |
| -1 | 11  | 14  | 5.61  | 0.90 |
| 1  | -11 | 14  | 5.67  | 0.68 |
| 1  | -11 | 14  | 6.06  | 0.73 |
| -1 | 11  | 14  | 7.40  | 0.85 |
| 1  | -11 | 14  | 6.98  | 0.78 |
| 1  | -11 | 14  | 5.38  | 0.74 |
| -1 | 11  | 14  | 6.25  | 0.75 |
| 1  | 11  | 14  | 6.50  | 0.72 |
| 1  | 11  | 14  | 5.98  | 0.89 |
| -1 | -11 | 14  | 6.59  | 1.36 |
| -1 | -11 | 14  | 6.07  | 0.74 |
| -1 | -11 | 14  | 6.22  | 0.74 |
| 1  | -11 | -14 | 7.50  | 0.71 |
| 1  | 11  | 14  | 6.66  | 0.50 |
| -2 | 11  | 14  | 0.36  | 0.55 |
| -2 | 11  | 14  | -0.29 | 0.41 |
| -2 | 11  | 14  | -0.01 | 0.41 |
| -2 | -11 | -14 | -0.29 | 0.37 |
| 2  | -11 | 14  | -0.12 | 0.41 |
| 2  | -11 | 14  | 0.10  | 0.42 |
| 2  | 11  | 14  | 0.27  | 0.29 |
| 2  | 11  | 14  | 0.49  | 0.43 |

## CIF S3

|    |     |     |       |      |
|----|-----|-----|-------|------|
| -2 | -11 | 14  | 0.33  | 0.28 |
| -2 | -11 | 14  | 0.15  | 0.35 |
| 2  | -11 | -14 | 0.17  | 0.43 |
| -3 | 11  | 14  | -0.05 | 0.31 |
| 3  | -11 | 14  | -0.76 | 0.45 |
| -3 | 11  | -14 | -0.21 | 0.40 |
| 3  | 11  | 14  | 0.03  | 0.39 |
| -3 | -11 | 14  | 0.18  | 0.23 |
| 0  | 0   | 15  | -0.17 | 0.50 |
| 0  | 0   | 15  | 0.82  | 0.69 |
| 0  | 0   | -15 | -1.07 | 1.00 |
| -1 | 0   | 15  | 35.27 | 1.89 |
| 1  | 0   | -15 | 34.98 | 2.27 |
| -1 | 0   | -15 | 29.35 | 2.31 |
| 1  | 0   | 15  | 34.35 | 1.97 |
| -1 | 0   | 15  | 34.40 | 2.04 |
| 2  | 0   | 15  | 5.22  | 0.83 |
| 2  | 0   | 15  | 4.44  | 0.85 |
| -2 | 0   | 15  | 5.42  | 0.91 |
| -2 | 0   | 15  | 5.09  | 0.68 |
| -2 | 0   | 15  | 5.45  | 1.00 |
| -3 | 0   | -15 | 15.51 | 1.56 |
| 3  | 0   | 15  | 16.78 | 1.21 |
| 3  | 0   | 15  | 15.13 | 1.24 |
| -3 | 0   | 15  | 15.10 | 1.17 |
| -3 | 0   | 15  | 14.79 | 1.01 |
| -3 | 0   | 15  | 15.87 | 1.35 |
| -3 | 0   | 15  | 14.93 | 1.02 |
| 3  | 0   | 15  | 13.98 | 1.45 |
| -4 | 0   | 15  | 5.72  | 0.77 |
| -4 | 0   | -15 | 5.13  | 1.30 |
| -4 | 0   | 15  | 6.00  | 0.87 |
| -4 | 0   | 15  | 6.56  | 0.58 |
| -4 | 0   | 15  | 6.68  | 0.70 |
| -4 | 0   | 15  | 5.95  | 0.60 |
| -4 | 0   | 15  | 8.18  | 1.10 |
| -5 | 0   | 15  | 10.21 | 0.78 |
| -5 | 0   | -15 | 10.06 | 1.59 |
| -5 | 0   | 15  | 9.02  | 0.65 |
| -5 | 0   | 15  | 11.52 | 1.19 |
| -6 | 0   | 15  | 5.59  | 0.37 |

## CIF S3

|    |    |     |       |      |
|----|----|-----|-------|------|
| -6 | 0  | -15 | 3.15  | 0.95 |
| -6 | 0  | 15  | 5.33  | 0.37 |
| -6 | 0  | -15 | 5.06  | 0.85 |
| -7 | 0  | -15 | 6.52  | 0.75 |
| -7 | 0  | -15 | 5.65  | 0.89 |
| -7 | 0  | -15 | 5.69  | 1.15 |
| 0  | 1  | 15  | 1.98  | 0.52 |
| 0  | -1 | 15  | 2.06  | 0.50 |
| 0  | -1 | -15 | 2.09  | 1.15 |
| 0  | -1 | 15  | 1.94  | 0.71 |
| 0  | -1 | 15  | 2.85  | 0.81 |
| 0  | 1  | -15 | 1.94  | 0.96 |
| 1  | 1  | -15 | 4.31  | 1.11 |
| 1  | -1 | 15  | 4.73  | 0.84 |
| -1 | -1 | -15 | 5.91  | 1.31 |
| 1  | -1 | 15  | 4.40  | 0.76 |
| -1 | 1  | 15  | 5.33  | 0.91 |
| -1 | 1  | 15  | 6.11  | 0.78 |
| 1  | 1  | 15  | 6.31  | 0.81 |
| -1 | -1 | 15  | 5.10  | 0.82 |
| -1 | 1  | -15 | 4.41  | 1.18 |
| -1 | -1 | 15  | 5.44  | 0.74 |
| 1  | 1  | 15  | 6.51  | 0.87 |
| 1  | -1 | -15 | 4.44  | 1.25 |
| -1 | -1 | 15  | 4.71  | 0.92 |
| 2  | -1 | 15  | 29.12 | 1.66 |
| -2 | 1  | 15  | 25.10 | 1.65 |
| -2 | 1  | 15  | 25.27 | 1.65 |
| 2  | -1 | 15  | 25.65 | 1.70 |
| -2 | 1  | 15  | 26.99 | 1.50 |
| 2  | 1  | 15  | 26.82 | 1.65 |
| -2 | -1 | 15  | 26.39 | 1.49 |
| -2 | -1 | 15  | 25.42 | 1.48 |
| -2 | -1 | 15  | 27.60 | 1.67 |
| 2  | 1  | 15  | 27.57 | 1.66 |
| -2 | -1 | 15  | 25.26 | 1.67 |
| -3 | 1  | 15  | 14.65 | 1.06 |
| 3  | -1 | 15  | 15.39 | 1.23 |
| -3 | 1  | 15  | 13.63 | 1.02 |
| -3 | 1  | 15  | 13.59 | 1.08 |
| -3 | -1 | -15 | 16.10 | 2.27 |

## CIF S3

|    |    |     |       |      |
|----|----|-----|-------|------|
| -3 | 1  | 15  | 14.22 | 1.20 |
| 3  | -1 | 15  | 14.81 | 1.16 |
| 3  | -1 | 15  | 13.03 | 1.45 |
| -3 | -1 | -15 | 14.81 | 1.56 |
| -3 | -1 | 15  | 13.46 | 0.93 |
| -3 | -1 | 15  | 14.12 | 1.31 |
| -3 | -1 | 15  | 14.35 | 1.11 |
| 3  | 1  | 15  | 12.49 | 1.37 |
| -3 | 1  | -15 | 13.78 | 1.70 |
| 3  | 1  | 15  | 15.02 | 1.21 |
| -3 | -1 | 15  | 12.93 | 0.96 |
| -4 | -1 | -15 | 14.68 | 1.54 |
| -4 | 1  | 15  | 16.41 | 0.99 |
| -4 | 1  | 15  | 15.53 | 1.37 |
| -4 | 1  | 15  | 12.93 | 0.92 |
| -4 | 1  | 15  | 15.44 | 1.03 |
| -4 | 1  | 15  | 14.22 | 1.10 |
| -4 | 1  | 15  | 14.70 | 0.93 |
| -4 | -1 | 15  | 18.51 | 1.37 |
| -4 | 1  | -15 | 15.49 | 1.55 |
| -4 | -1 | 15  | 14.49 | 0.91 |
| -4 | -1 | 15  | 15.04 | 0.88 |
| -4 | -1 | 15  | 15.60 | 1.06 |
| -4 | -1 | 15  | 14.79 | 0.95 |
| -5 | 1  | 15  | 6.26  | 0.40 |
| -5 | 1  | 15  | 6.04  | 0.56 |
| -5 | -1 | -15 | 7.81  | 1.49 |
| -5 | -1 | 15  | 6.55  | 0.50 |
| -5 | -1 | 15  | 6.10  | 0.54 |
| -5 | -1 | 15  | 6.26  | 1.10 |
| -5 | 1  | -15 | 8.26  | 1.43 |
| -5 | 1  | -15 | 7.12  | 1.83 |
| -6 | -1 | -15 | 3.02  | 0.78 |
| -6 | 1  | 15  | 1.92  | 0.34 |
| -6 | 1  | 15  | 1.37  | 0.33 |
| -6 | 1  | 15  | 1.51  | 0.31 |
| -6 | -1 | -15 | 1.80  | 1.01 |
| -6 | 1  | -15 | 0.50  | 0.99 |
| -6 | 1  | -15 | 1.24  | 0.55 |
| -6 | 1  | -15 | 1.14  | 0.81 |
| -7 | -1 | -15 | 4.79  | 0.80 |

## CIF S3

|    |    |     |       |      |
|----|----|-----|-------|------|
| -7 | -1 | -15 | 2.17  | 0.75 |
| -7 | -1 | -15 | 3.77  | 0.70 |
| -7 | 1  | -15 | 2.04  | 0.77 |
| -7 | 1  | -15 | 4.32  | 0.93 |
| 0  | -2 | 15  | 7.72  | 0.81 |
| 0  | 2  | 15  | 7.71  | 0.90 |
| 0  | -2 | 15  | 8.31  | 0.97 |
| 0  | -2 | -15 | 8.97  | 1.49 |
| 0  | 2  | -15 | 7.58  | 1.19 |
| 0  | -2 | 15  | 7.32  | 1.08 |
| -1 | 2  | 15  | 0.98  | 0.51 |
| 1  | -2 | 15  | 2.20  | 0.74 |
| -1 | 2  | 15  | 0.86  | 0.67 |
| 1  | -2 | 15  | 2.21  | 0.76 |
| 1  | -2 | 15  | 3.27  | 0.82 |
| -1 | -2 | 15  | 3.07  | 0.77 |
| 1  | 2  | 15  | 2.92  | 0.75 |
| -1 | -2 | 15  | 2.58  | 0.70 |
| -1 | 2  | -15 | 1.86  | 1.09 |
| -1 | -2 | 15  | 2.89  | 0.58 |
| 1  | 2  | 15  | 0.99  | 0.55 |
| 2  | -2 | 15  | 7.51  | 1.16 |
| 2  | -2 | 15  | 7.59  | 0.93 |
| -2 | 2  | 15  | 7.40  | 0.99 |
| -2 | 2  | 15  | 7.10  | 0.77 |
| 2  | 2  | 15  | 7.79  | 0.92 |
| 2  | 2  | 15  | 8.31  | 0.95 |
| -2 | -2 | 15  | 7.76  | 0.66 |
| -2 | -2 | 15  | 6.85  | 0.99 |
| -2 | -2 | 15  | 7.16  | 0.95 |
| -3 | 2  | 15  | 13.84 | 1.00 |
| 3  | -2 | 15  | 15.87 | 1.38 |
| 3  | -2 | 15  | 12.99 | 1.24 |
| 3  | -2 | 15  | 11.52 | 1.42 |
| -3 | -2 | -15 | 15.12 | 1.55 |
| 3  | -2 | 15  | 14.93 | 1.16 |
| -3 | 2  | 15  | 13.88 | 1.25 |
| -3 | 2  | 15  | 13.74 | 1.10 |
| -3 | 2  | 15  | 12.19 | 1.03 |
| -3 | 2  | 15  | 12.33 | 1.05 |
| 3  | 2  | 15  | 9.05  | 1.28 |

## CIF S3

|    |    |     |       |      |
|----|----|-----|-------|------|
| -3 | -2 | 15  | 12.64 | 1.28 |
| -3 | -2 | 15  | 13.83 | 1.06 |
| -3 | -2 | 15  | 12.66 | 0.91 |
| -3 | 2  | -15 | 13.72 | 1.63 |
| -3 | -2 | 15  | 12.62 | 0.90 |
| 3  | 2  | 15  | 13.25 | 1.09 |
| -3 | -2 | 15  | 12.11 | 0.93 |
| -4 | 2  | 15  | 13.42 | 1.23 |
| -4 | 2  | 15  | 13.11 | 0.94 |
| -4 | -2 | -15 | 12.20 | 1.62 |
| -4 | 2  | 15  | 12.82 | 1.01 |
| -4 | 2  | 15  | 11.77 | 0.90 |
| -4 | 2  | 15  | 12.32 | 0.97 |
| -4 | 2  | -15 | 12.70 | 1.68 |
| -4 | -2 | 15  | 14.44 | 1.30 |
| -4 | -2 | 15  | 12.46 | 0.94 |
| -4 | 2  | -15 | 13.50 | 1.75 |
| -4 | -2 | 15  | 13.19 | 0.74 |
| -4 | -2 | 15  | 12.40 | 0.83 |
| -5 | -2 | -15 | 6.30  | 1.47 |
| -5 | 2  | 15  | 6.39  | 0.61 |
| -5 | 2  | 15  | 6.43  | 0.67 |
| -5 | 2  | 15  | 6.69  | 0.53 |
| -5 | 2  | -15 | 7.32  | 1.32 |
| -5 | -2 | 15  | 6.41  | 0.51 |
| -5 | -2 | 15  | 6.59  | 1.05 |
| -5 | 2  | -15 | 6.44  | 1.40 |
| -5 | -2 | 15  | 7.07  | 0.48 |
| -6 | 2  | 15  | 12.18 | 0.68 |
| -6 | -2 | -15 | 10.85 | 1.43 |
| -6 | -2 | -15 | 9.77  | 0.87 |
| -6 | 2  | 15  | 10.62 | 0.69 |
| -6 | 2  | -15 | 12.03 | 1.29 |
| -6 | 2  | -15 | 10.63 | 1.43 |
| -6 | 2  | -15 | 12.53 | 1.02 |
| -7 | -2 | -15 | 2.39  | 0.65 |
| -7 | -2 | -15 | 3.88  | 1.05 |
| -7 | -2 | -15 | 1.67  | 0.52 |
| -7 | 2  | -15 | 3.21  | 0.91 |
| -7 | 2  | -15 | 4.02  | 1.08 |
| 0  | -3 | 15  | 10.85 | 0.89 |



## CIF S3

|    |    |     |       |      |
|----|----|-----|-------|------|
| 0  | -3 | 15  | 11.73 | 0.99 |
| 0  | 3  | 15  | 10.76 | 1.16 |
| 0  | 3  | 15  | 10.89 | 1.04 |
| 0  | -3 | 15  | 10.14 | 1.20 |
| 0  | -3 | 15  | 12.01 | 1.10 |
| -1 | 3  | 15  | 5.16  | 0.97 |
| 1  | -3 | 15  | 4.12  | 0.68 |
| -1 | 3  | 15  | 4.12  | 0.78 |
| 1  | -3 | 15  | 4.50  | 0.86 |
| 1  | 3  | 15  | 3.28  | 0.78 |
| 1  | 3  | 15  | 3.33  | 0.79 |
| -1 | -3 | 15  | 3.37  | 0.76 |
| -1 | -3 | 15  | 3.17  | 0.79 |
| 1  | 3  | 15  | 5.15  | 1.13 |
| -1 | -3 | 15  | 3.25  | 0.78 |
| -2 | 3  | 15  | 15.06 | 1.16 |
| -2 | 3  | 15  | 18.62 | 1.33 |
| -2 | 3  | 15  | 14.52 | 1.17 |
| 2  | -3 | 15  | 16.64 | 1.25 |
| 2  | -3 | 15  | 15.50 | 1.55 |
| -2 | 3  | 15  | 15.82 | 1.08 |
| 2  | -3 | 15  | 15.49 | 1.39 |
| 2  | -3 | 15  | 15.95 | 1.25 |
| -2 | 3  | 15  | 15.71 | 1.22 |
| -2 | 3  | 15  | 15.61 | 1.19 |
| 2  | -3 | 15  | 16.49 | 1.19 |
| 2  | 3  | 15  | 15.35 | 1.22 |
| 2  | 3  | 15  | 13.58 | 1.58 |
| 2  | 3  | 15  | 16.32 | 1.19 |
| -2 | -3 | 15  | 15.58 | 1.24 |
| -2 | -3 | 15  | 15.26 | 1.11 |
| 2  | 3  | 15  | 14.98 | 1.22 |
| -2 | -3 | 15  | 18.88 | 1.09 |
| -2 | -3 | 15  | 16.27 | 1.25 |
| -3 | 3  | 15  | 6.92  | 0.86 |
| 3  | -3 | 15  | 6.95  | 1.16 |
| -3 | 3  | 15  | 7.45  | 0.74 |
| 3  | -3 | 15  | 5.09  | 0.83 |
| -3 | 3  | 15  | 9.62  | 0.88 |
| -3 | -3 | -15 | 9.89  | 1.39 |
| -3 | 3  | 15  | 6.26  | 0.93 |

## CIF S3

|    |    |     |      |      |
|----|----|-----|------|------|
| 3  | -3 | 15  | 5.31 | 1.26 |
| 3  | -3 | 15  | 5.82 | 0.89 |
| -3 | 3  | 15  | 6.78 | 0.94 |
| -3 | -3 | 15  | 7.11 | 0.70 |
| -3 | 3  | -15 | 6.74 | 1.22 |
| -3 | 3  | -15 | 8.12 | 1.25 |
| -3 | -3 | 15  | 7.36 | 1.00 |
| -3 | -3 | 15  | 6.13 | 0.72 |
| -3 | -3 | 15  | 7.04 | 0.86 |
| 3  | 3  | 15  | 8.03 | 0.98 |
| -3 | -3 | 15  | 7.28 | 0.67 |
| -4 | 3  | 15  | 1.95 | 0.44 |
| -4 | 3  | 15  | 1.75 | 0.46 |
| -4 | 3  | 15  | 0.55 | 0.53 |
| -4 | 3  | 15  | 0.93 | 0.48 |
| -4 | 3  | -15 | 0.85 | 0.88 |
| -4 | -3 | 15  | 1.74 | 0.31 |
| -4 | -3 | 15  | 2.08 | 0.47 |
| -4 | 3  | -15 | 2.00 | 1.11 |
| -4 | -3 | 15  | 2.20 | 0.82 |
| -4 | -3 | 15  | 1.81 | 0.47 |
| -5 | 3  | 15  | 8.84 | 0.76 |
| -5 | 3  | 15  | 8.18 | 0.64 |
| -5 | -3 | -15 | 8.20 | 1.46 |
| -5 | 3  | 15  | 7.92 | 0.72 |
| -5 | 3  | -15 | 7.37 | 1.42 |
| -5 | -3 | 15  | 8.43 | 0.56 |
| -5 | -3 | 15  | 8.05 | 0.51 |
| -5 | 3  | -15 | 7.81 | 1.37 |
| -5 | -3 | 15  | 7.44 | 1.06 |
| -5 | -3 | 15  | 7.86 | 0.54 |
| -6 | -3 | -15 | 4.87 | 1.23 |
| -6 | -3 | -15 | 6.80 | 0.61 |
| -6 | 3  | 15  | 5.39 | 0.52 |
| -6 | 3  | 15  | 6.18 | 0.52 |
| -6 | -3 | -15 | 5.20 | 1.16 |
| -6 | 3  | -15 | 5.29 | 1.19 |
| -6 | 3  | -15 | 5.62 | 1.31 |
| -6 | 3  | -15 | 7.02 | 0.88 |
| 6  | 3  | 15  | 6.10 | 0.88 |
| -7 | -3 | -15 | 0.60 | 0.67 |

## CIF S3

|    |    |     |       |      |
|----|----|-----|-------|------|
| -7 | -3 | -15 | 0.33  | 0.54 |
| -7 | -3 | -15 | 0.33  | 0.40 |
| -7 | 3  | -15 | 0.23  | 0.67 |
| -7 | 3  | -15 | 0.26  | 0.59 |
| 7  | 3  | 15  | 0.25  | 0.31 |
| 0  | -4 | 15  | 0.72  | 0.59 |
| 0  | -4 | 15  | -0.09 | 0.74 |
| 0  | -4 | 15  | -0.03 | 0.52 |
| 0  | -4 | 15  | 0.35  | 0.56 |
| 0  | 4  | 15  | -0.53 | 0.49 |
| 0  | 4  | 15  | -0.21 | 0.61 |
| 0  | 4  | 15  | 0.61  | 0.55 |
| 0  | -4 | 15  | 0.12  | 0.68 |
| 0  | -4 | 15  | -0.36 | 0.50 |
| 0  | 4  | 15  | 0.06  | 0.56 |
| 0  | -4 | 15  | 0.65  | 0.45 |
| 0  | 4  | 15  | 0.18  | 0.35 |
| 1  | -4 | 15  | 3.24  | 0.83 |
| 1  | -4 | 15  | 2.38  | 0.61 |
| -1 | 4  | 15  | 2.01  | 0.60 |
| 1  | -4 | 15  | 3.30  | 0.64 |
| 1  | -4 | 15  | 2.48  | 0.74 |
| -1 | 4  | 15  | 3.05  | 0.87 |
| 1  | -4 | 15  | 2.76  | 0.62 |
| -1 | 4  | 15  | 1.79  | 0.57 |
| -1 | 4  | 15  | 1.83  | 0.57 |
| 1  | 4  | 15  | 1.71  | 0.60 |
| -1 | -4 | 15  | 3.55  | 0.92 |
| 1  | 4  | 15  | 1.27  | 0.52 |
| -1 | -4 | 15  | 4.38  | 1.10 |
| -1 | -4 | 15  | 1.85  | 0.64 |
| 1  | 4  | 15  | 1.60  | 0.60 |
| -1 | -4 | 15  | 2.50  | 0.63 |
| -1 | -4 | 15  | 2.44  | 0.75 |
| 1  | 4  | 15  | 2.85  | 0.74 |
| -1 | -4 | 15  | 2.04  | 0.56 |
| 1  | 4  | 15  | 3.58  | 0.85 |
| -2 | 4  | 15  | 15.48 | 1.16 |
| 2  | -4 | 15  | 15.53 | 1.42 |
| 2  | -4 | 15  | 16.63 | 1.26 |
| -2 | 4  | 15  | 15.54 | 1.31 |

## CIF S3

|    |    |     |       |      |
|----|----|-----|-------|------|
| -2 | 4  | 15  | 14.54 | 1.29 |
| -2 | 4  | 15  | 17.55 | 1.11 |
| 2  | -4 | 15  | 14.82 | 1.71 |
| -2 | 4  | 15  | 15.66 | 1.20 |
| 2  | -4 | 15  | 15.83 | 1.22 |
| -2 | 4  | 15  | 16.15 | 1.20 |
| -2 | -4 | 15  | 17.40 | 1.23 |
| 2  | 4  | 15  | 11.52 | 1.42 |
| -2 | -4 | 15  | 16.87 | 1.25 |
| 2  | 4  | 15  | 17.18 | 1.26 |
| 2  | 4  | 15  | 15.28 | 1.23 |
| -2 | -4 | 15  | 15.46 | 1.13 |
| -3 | 4  | 15  | 2.78  | 0.56 |
| 3  | -4 | 15  | 2.58  | 0.79 |
| -3 | 4  | 15  | 2.45  | 0.72 |
| -3 | 4  | 15  | 2.17  | 0.54 |
| -3 | 4  | 15  | 2.97  | 0.61 |
| 3  | -4 | 15  | 3.52  | 0.70 |
| 3  | -4 | 15  | 2.61  | 1.17 |
| -3 | 4  | 15  | 2.56  | 0.67 |
| -3 | -4 | 15  | 3.93  | 0.84 |
| -3 | 4  | -15 | 2.07  | 0.88 |
| -3 | -4 | 15  | 2.79  | 0.63 |
| -3 | -4 | 15  | 3.02  | 0.59 |
| -3 | 4  | -15 | 4.15  | 1.12 |
| -3 | -4 | 15  | 3.91  | 0.78 |
| -3 | -4 | 15  | 2.82  | 0.60 |
| -4 | 4  | 15  | 0.76  | 0.58 |
| -4 | -4 | -15 | 3.45  | 0.80 |
| 4  | -4 | 15  | 3.79  | 1.07 |
| -4 | 4  | 15  | 4.20  | 0.78 |
| -4 | 4  | 15  | 2.95  | 0.64 |
| -4 | 4  | 15  | 3.40  | 0.72 |
| -4 | -4 | 15  | 3.81  | 0.51 |
| -4 | 4  | -15 | 2.42  | 0.89 |
| -4 | -4 | 15  | 4.93  | 0.98 |
| -4 | 4  | -15 | 4.79  | 1.07 |
| -5 | 4  | 15  | 0.94  | 0.43 |
| -5 | 4  | 15  | 0.89  | 0.38 |
| -5 | 4  | 15  | 1.42  | 0.47 |
| -5 | 4  | 15  | 0.90  | 0.32 |

## CIF S3

|    |    |     |       |      |
|----|----|-----|-------|------|
| -5 | -4 | 15  | 1.32  | 0.31 |
| -5 | 4  | -15 | 0.31  | 0.94 |
| 5  | 4  | 15  | 1.17  | 0.43 |
| -5 | 4  | -15 | 1.10  | 0.89 |
| -5 | -4 | 15  | 1.10  | 0.28 |
| -5 | -4 | 15  | 1.15  | 0.29 |
| -5 | -4 | 15  | 0.87  | 0.73 |
| -6 | 4  | 15  | 3.15  | 0.46 |
| -6 | -4 | -15 | 2.11  | 0.81 |
| -6 | 4  | -15 | 3.09  | 0.84 |
| -6 | 4  | -15 | 3.73  | 0.71 |
| -6 | 4  | -15 | 3.10  | 0.81 |
| 6  | 4  | 15  | 2.76  | 0.58 |
| -7 | -4 | -15 | 1.57  | 0.57 |
| -7 | -4 | -15 | 2.26  | 0.46 |
| -7 | 4  | -15 | 3.44  | 0.91 |
| -7 | 4  | -15 | 2.11  | 0.56 |
| 7  | 4  | 15  | 1.87  | 0.46 |
| 0  | 5  | 15  | 58.12 | 2.99 |
| 0  | -5 | 15  | 62.45 | 3.08 |
| 0  | 5  | 15  | 61.79 | 3.68 |
| 0  | -5 | 15  | 59.66 | 3.00 |
| 0  | -5 | 15  | 59.44 | 3.19 |
| 0  | -5 | 15  | 58.27 | 3.15 |
| 0  | -5 | 15  | 55.25 | 3.21 |
| 0  | 5  | 15  | 60.69 | 3.14 |
| 0  | -5 | 15  | 57.72 | 3.13 |
| 0  | 5  | 15  | 60.55 | 3.19 |
| 0  | -5 | 15  | 60.85 | 3.14 |
| 0  | 5  | 15  | 59.01 | 3.14 |
| 1  | -5 | 15  | 7.65  | 1.11 |
| -1 | 5  | 15  | 8.09  | 1.01 |
| 1  | -5 | 15  | 7.64  | 1.04 |
| 1  | -5 | 15  | 7.56  | 0.85 |
| 1  | -5 | 15  | 6.91  | 0.92 |
| -1 | 5  | 15  | 5.81  | 1.00 |
| 1  | -5 | 15  | 6.70  | 0.95 |
| -1 | 5  | 15  | 6.36  | 0.93 |
| -1 | 5  | 15  | 6.95  | 0.90 |
| 1  | -5 | 15  | 7.21  | 0.97 |
| -1 | -5 | 15  | 8.29  | 1.06 |

## CIF S3

|    |    |     |       |      |
|----|----|-----|-------|------|
| -1 | -5 | 15  | 7.94  | 1.04 |
| -1 | -5 | 15  | 7.80  | 1.00 |
| 1  | 5  | 15  | 8.70  | 1.05 |
| 1  | 5  | 15  | 7.20  | 0.94 |
| 1  | 5  | 15  | 5.63  | 0.87 |
| 2  | -5 | 15  | 0.71  | 0.71 |
| -2 | 5  | 15  | 0.47  | 0.62 |
| -2 | 5  | 15  | 1.01  | 0.55 |
| 2  | -5 | 15  | 0.15  | 0.72 |
| -2 | 5  | 15  | 1.11  | 0.59 |
| 2  | -5 | 15  | 0.60  | 0.50 |
| -2 | 5  | 15  | 1.08  | 0.62 |
| 2  | -5 | 15  | 0.41  | 1.03 |
| 2  | -5 | 15  | 1.65  | 0.68 |
| -2 | 5  | 15  | 0.60  | 0.57 |
| -2 | 5  | 15  | 0.94  | 0.70 |
| -2 | -5 | 15  | 1.27  | 0.69 |
| -2 | -5 | 15  | 0.25  | 0.80 |
| -2 | -5 | 15  | 0.98  | 0.64 |
| 2  | 5  | 15  | 1.30  | 0.68 |
| -2 | -5 | 15  | 1.21  | 0.49 |
| -3 | -5 | -15 | 0.35  | 0.75 |
| 3  | -5 | 15  | 0.94  | 0.66 |
| 3  | -5 | 15  | 0.17  | 0.37 |
| -3 | 5  | 15  | 0.12  | 0.56 |
| 3  | -5 | 15  | 0.63  | 0.72 |
| -3 | 5  | 15  | 1.58  | 0.56 |
| -3 | 5  | 15  | 0.33  | 0.53 |
| -3 | 5  | 15  | 0.18  | 0.68 |
| -3 | 5  | 15  | 1.05  | 0.52 |
| -3 | 5  | 15  | 0.30  | 0.64 |
| -3 | 5  | -15 | 1.45  | 1.03 |
| -3 | -5 | 15  | 0.32  | 0.36 |
| -3 | -5 | 15  | 0.43  | 0.39 |
| -3 | -5 | 15  | 0.39  | 0.36 |
| -3 | -5 | 15  | 0.39  | 0.53 |
| -3 | -5 | 15  | 0.85  | 0.69 |
| -3 | 5  | -15 | 0.04  | 0.84 |
| -4 | 5  | 15  | 12.20 | 1.00 |
| -4 | 5  | 15  | 12.33 | 0.98 |
| 4  | -5 | 15  | 12.00 | 1.27 |

## CIF S3

|    |    |     |       |      |
|----|----|-----|-------|------|
| -4 | 5  | -15 | 12.16 | 1.53 |
| -4 | 5  | -15 | 11.83 | 1.35 |
| -4 | -5 | 15  | 12.36 | 0.77 |
| -4 | -5 | 15  | 11.75 | 1.20 |
| 4  | 5  | 15  | 11.26 | 0.99 |
| -5 | 5  | 15  | 2.82  | 0.50 |
| -5 | 5  | 15  | 1.79  | 0.46 |
| -5 | -5 | -15 | 2.05  | 0.46 |
| -5 | 5  | 15  | 2.36  | 0.58 |
| -5 | -5 | 15  | 2.61  | 0.26 |
| -5 | 5  | -15 | 1.74  | 0.80 |
| -5 | 5  | -15 | 2.08  | 0.89 |
| -5 | -5 | 15  | 4.32  | 0.96 |
| -5 | -5 | 15  | 2.49  | 0.26 |
| 5  | 5  | 15  | 2.42  | 0.68 |
| -6 | -5 | -15 | 1.10  | 0.52 |
| -6 | 5  | 15  | 2.98  | 0.47 |
| -6 | 5  | 15  | 2.03  | 0.50 |
| -6 | -5 | -15 | 3.27  | 0.83 |
| -6 | -5 | -15 | 1.96  | 0.80 |
| 6  | 5  | 15  | 2.33  | 0.56 |
| -6 | 5  | -15 | 2.52  | 0.76 |
| -6 | 5  | -15 | 2.70  | 0.76 |
| -6 | 5  | -15 | 3.63  | 0.59 |
| -7 | -5 | -15 | -0.38 | 0.63 |
| -7 | -5 | -15 | 0.16  | 0.38 |
| -7 | 5  | -15 | 0.32  | 0.50 |
| 7  | 5  | 15  | 0.34  | 0.33 |
| 0  | -6 | 15  | 2.59  | 0.62 |
| 0  | -6 | 15  | 2.34  | 0.67 |
| 0  | -6 | 15  | 2.27  | 0.55 |
| 0  | -6 | 15  | 2.01  | 0.79 |
| 0  | 6  | 15  | 2.31  | 0.64 |
| 0  | 6  | 15  | 2.27  | 0.67 |
| 0  | 6  | 15  | 2.99  | 0.57 |
| 0  | -6 | 15  | 1.79  | 0.72 |
| 0  | -6 | 15  | 2.57  | 0.70 |
| 0  | 6  | 15  | 2.15  | 0.70 |
| 0  | -6 | 15  | 2.88  | 0.65 |
| 1  | -6 | 15  | 13.02 | 1.22 |
| 1  | -6 | 15  | 11.61 | 1.24 |

## CIF S3

|    |    |     |       |      |
|----|----|-----|-------|------|
| -1 | 6  | 15  | 12.55 | 1.09 |
| -1 | 6  | 15  | 13.93 | 2.95 |
| 1  | -6 | 15  | 14.59 | 1.15 |
| 1  | -6 | 15  | 12.51 | 1.08 |
| 1  | -6 | 15  | 13.86 | 2.17 |
| 1  | -6 | 15  | 12.77 | 1.14 |
| 1  | -6 | 15  | 12.44 | 1.11 |
| -1 | 6  | 15  | 13.19 | 1.19 |
| -1 | 6  | 15  | 13.96 | 1.17 |
| -1 | -6 | 15  | 11.47 | 0.93 |
| -1 | -6 | 15  | 13.01 | 1.06 |
| 1  | 6  | 15  | 12.45 | 1.11 |
| -1 | -6 | 15  | 13.49 | 1.23 |
| 1  | 6  | 15  | 12.69 | 1.21 |
| -1 | -6 | 15  | 10.85 | 1.11 |
| -1 | -6 | 15  | 12.29 | 1.18 |
| -2 | 6  | 15  | 3.25  | 0.63 |
| -2 | 6  | 15  | 3.46  | 0.97 |
| -2 | 6  | 15  | 3.23  | 0.97 |
| -2 | -6 | -15 | 3.34  | 0.91 |
| 2  | -6 | 15  | 5.17  | 1.05 |
| 2  | -6 | 15  | 3.18  | 0.76 |
| 2  | -6 | 15  | 2.15  | 0.72 |
| 2  | -6 | 15  | 4.30  | 1.03 |
| -2 | 6  | 15  | 3.96  | 0.91 |
| 2  | -6 | 15  | 3.64  | 0.75 |
| -2 | 6  | 15  | 3.76  | 0.90 |
| -2 | -6 | 15  | 3.20  | 0.77 |
| -2 | -6 | 15  | 3.64  | 0.79 |
| -2 | -6 | 15  | 2.96  | 0.55 |
| -2 | -6 | 15  | 3.20  | 0.80 |
| 2  | 6  | 15  | 3.77  | 1.00 |
| -3 | 6  | 15  | 3.71  | 0.84 |
| 3  | -6 | 15  | 4.90  | 1.03 |
| -3 | 6  | 15  | 4.19  | 0.81 |
| 3  | -6 | 15  | 3.12  | 0.97 |
| -3 | 6  | 15  | 3.67  | 0.79 |
| 3  | -6 | 15  | 2.91  | 1.09 |
| 3  | -6 | 15  | 4.18  | 0.94 |
| -3 | -6 | -15 | 4.14  | 0.91 |
| -3 | 6  | 15  | 3.30  | 0.86 |



## CIF S3

|    |    |     |      |      |
|----|----|-----|------|------|
| -3 | 6  | 15  | 4.76 | 0.84 |
| 3  | -6 | 15  | 2.94 | 0.74 |
| 3  | 6  | 15  | 4.90 | 0.76 |
| -3 | -6 | 15  | 4.63 | 0.96 |
| -3 | -6 | 15  | 4.25 | 0.63 |
| -3 | -6 | 15  | 4.19 | 0.69 |
| -3 | -6 | 15  | 4.55 | 0.60 |
| 4  | -6 | 15  | 3.44 | 1.03 |
| -4 | 6  | 15  | 4.25 | 0.77 |
| -4 | 6  | 15  | 3.38 | 0.79 |
| -4 | 6  | 15  | 4.10 | 0.65 |
| -4 | 6  | -15 | 2.40 | 0.88 |
| -4 | -6 | 15  | 3.34 | 0.88 |
| -4 | -6 | 15  | 3.01 | 0.48 |
| -4 | 6  | -15 | 4.35 | 1.23 |
| -4 | -6 | 15  | 3.07 | 0.53 |
| 4  | 6  | 15  | 3.87 | 0.75 |
| -5 | -6 | -15 | 1.86 | 0.40 |
| -5 | 6  | 15  | 2.33 | 0.49 |
| -5 | 6  | 15  | 2.28 | 0.48 |
| -5 | 6  | 15  | 2.05 | 0.51 |
| -5 | 6  | -15 | 1.59 | 0.74 |
| 5  | 6  | 15  | 2.68 | 0.66 |
| -5 | 6  | -15 | 2.43 | 0.81 |
| -6 | 6  | 15  | 1.70 | 0.46 |
| -6 | 6  | 15  | 0.87 | 0.26 |
| -6 | -6 | -15 | 0.78 | 0.43 |
| -6 | 6  | -15 | 2.07 | 0.67 |
| 6  | 6  | 15  | 1.05 | 0.35 |
| -6 | 6  | -15 | 1.47 | 0.34 |
| 0  | -7 | 15  | 2.53 | 0.67 |
| 0  | -7 | 15  | 3.16 | 0.83 |
| 0  | 7  | 15  | 1.60 | 0.69 |
| 0  | -7 | 15  | 3.15 | 0.78 |
| 0  | -7 | 15  | 4.06 | 0.85 |
| 0  | 7  | 15  | 3.28 | 0.71 |
| 0  | 7  | 15  | 3.69 | 1.00 |
| 0  | -7 | 15  | 2.32 | 0.73 |
| 0  | 7  | 15  | 2.95 | 0.53 |
| 0  | -7 | 15  | 3.36 | 0.93 |
| 0  | -7 | 15  | 4.34 | 0.69 |

## CIF S3

|    |    |     |       |      |
|----|----|-----|-------|------|
| 1  | -7 | 15  | 0.74  | 0.63 |
| 1  | -7 | 15  | 2.71  | 0.72 |
| 1  | -7 | 15  | 1.80  | 0.68 |
| 1  | -7 | 15  | 2.46  | 0.66 |
| 1  | -7 | 15  | 1.94  | 0.83 |
| -1 | 7  | 15  | 0.71  | 0.60 |
| 1  | -7 | 15  | 1.84  | 0.80 |
| 1  | -7 | 15  | 3.01  | 0.79 |
| 1  | -7 | 15  | 1.29  | 0.65 |
| -1 | 7  | 15  | 1.65  | 0.67 |
| -1 | -7 | -15 | 2.61  | 1.05 |
| -1 | 7  | 15  | 2.20  | 0.65 |
| -1 | -7 | 15  | 1.73  | 0.49 |
| 1  | 7  | 15  | 1.30  | 0.49 |
| -1 | -7 | 15  | 2.96  | 0.83 |
| 1  | 7  | 15  | 0.79  | 0.58 |
| -1 | -7 | 15  | 2.13  | 0.75 |
| -1 | -7 | 15  | 1.82  | 0.55 |
| -1 | -7 | 15  | 1.37  | 0.58 |
| 1  | 7  | 15  | 2.27  | 0.72 |
| 2  | -7 | 15  | -0.82 | 0.66 |
| -2 | 7  | 15  | 0.35  | 0.50 |
| -2 | -7 | -15 | 1.09  | 0.75 |
| -2 | 7  | 15  | 0.03  | 0.56 |
| 2  | -7 | 15  | -0.31 | 0.42 |
| 2  | -7 | 15  | 0.60  | 0.64 |
| 2  | -7 | 15  | -0.37 | 0.68 |
| -2 | 7  | 15  | 0.85  | 0.61 |
| -2 | 7  | 15  | -0.62 | 0.65 |
| 2  | -7 | 15  | 0.26  | 0.63 |
| -2 | 7  | 15  | -0.41 | 0.59 |
| 2  | -7 | 15  | 1.55  | 0.82 |
| -2 | -7 | 15  | 0.08  | 0.62 |
| -2 | -7 | 15  | -0.47 | 0.50 |
| 2  | 7  | 15  | 0.36  | 0.47 |
| -2 | -7 | 15  | -0.29 | 0.45 |
| -3 | 7  | 15  | 1.08  | 0.63 |
| 3  | -7 | 15  | 0.50  | 0.34 |
| 3  | -7 | 15  | 1.02  | 0.69 |
| 3  | -7 | 15  | 1.81  | 0.64 |
| -3 | 7  | 15  | 1.03  | 0.55 |

## CIF S3

|    |    |     |       |      |
|----|----|-----|-------|------|
| 3  | -7 | 15  | 1.67  | 0.70 |
| -3 | 7  | 15  | -0.12 | 0.51 |
| -3 | 7  | 15  | 0.84  | 0.52 |
| -3 | 7  | 15  | 1.00  | 0.51 |
| -3 | -7 | 15  | 1.29  | 0.32 |
| -3 | -7 | 15  | 1.66  | 0.69 |
| -3 | -7 | 15  | 1.22  | 0.35 |
| -3 | -7 | 15  | 1.04  | 0.38 |
| -3 | 7  | -15 | 2.29  | 0.90 |
| 3  | 7  | 15  | 1.47  | 0.51 |
| -4 | 7  | 15  | 2.38  | 0.46 |
| -4 | 7  | 15  | 1.81  | 0.50 |
| -4 | 7  | 15  | 2.38  | 0.49 |
| -4 | -7 | -15 | 3.58  | 0.60 |
| 4  | -7 | 15  | 2.43  | 0.69 |
| -4 | -7 | 15  | 2.51  | 0.43 |
| -4 | 7  | -15 | 2.09  | 0.82 |
| 4  | 7  | 15  | 3.41  | 0.70 |
| -4 | 7  | -15 | 1.70  | 0.75 |
| -4 | -7 | 15  | 2.27  | 0.47 |
| -5 | 7  | 15  | 2.72  | 0.51 |
| -5 | 7  | 15  | 1.36  | 0.43 |
| 5  | -7 | 15  | 2.98  | 0.63 |
| -5 | 7  | 15  | 1.39  | 0.36 |
| 5  | 7  | 15  | 3.11  | 0.63 |
| -5 | 7  | -15 | 3.29  | 0.92 |
| -5 | 7  | -15 | 1.91  | 0.68 |
| -6 | -7 | -15 | 0.37  | 0.49 |
| -6 | 7  | 15  | 0.44  | 0.46 |
| -6 | 7  | 15  | 0.64  | 0.26 |
| -6 | 7  | -15 | 0.85  | 0.50 |
| 6  | 7  | 15  | 0.58  | 0.32 |
| -6 | 7  | -15 | 0.62  | 0.25 |
| 0  | -8 | 15  | 10.90 | 0.92 |
| 0  | -8 | 15  | 9.80  | 1.03 |
| 0  | 8  | 15  | 10.88 | 1.05 |
| 0  | 8  | 15  | 10.63 | 1.16 |
| 0  | -8 | 15  | 10.39 | 1.01 |
| 0  | -8 | 15  | 9.98  | 0.94 |
| 0  | -8 | 15  | 9.91  | 1.04 |
| 0  | -8 | 15  | 9.88  | 1.04 |

## CIF S3

|    |    |     |       |      |
|----|----|-----|-------|------|
| 0  | 8  | 15  | 11.73 | 1.14 |
| 0  | 8  | 15  | 10.31 | 0.70 |
| -1 | 8  | 15  | 1.93  | 0.63 |
| 1  | -8 | 15  | 4.11  | 0.56 |
| -1 | -8 | -15 | 3.71  | 1.01 |
| 1  | -8 | 15  | 1.75  | 0.64 |
| 1  | -8 | 15  | 3.22  | 0.62 |
| 1  | -8 | 15  | 1.53  | 0.59 |
| 1  | -8 | 15  | 2.36  | 0.63 |
| -1 | 8  | 15  | 2.09  | 0.68 |
| 1  | -8 | 15  | 3.58  | 0.90 |
| -1 | 8  | 15  | 1.87  | 0.72 |
| 1  | -8 | 15  | 3.52  | 0.91 |
| 1  | -8 | 15  | 3.12  | 1.32 |
| 1  | 8  | 15  | 1.90  | 0.70 |
| -1 | -8 | 15  | 3.05  | 0.81 |
| -1 | -8 | 15  | 3.72  | 0.75 |
| 1  | 8  | 15  | 3.39  | 0.81 |
| 1  | 8  | 15  | 3.56  | 0.61 |
| -1 | -8 | 15  | 2.46  | 0.71 |
| -2 | 8  | 15  | 7.18  | 0.94 |
| 2  | -8 | 15  | 8.04  | 1.26 |
| -2 | -8 | -15 | 8.10  | 0.88 |
| -2 | 8  | 15  | 7.32  | 0.92 |
| 2  | -8 | 15  | 7.18  | 1.10 |
| 2  | -8 | 15  | 8.17  | 0.98 |
| -2 | 8  | 15  | 7.42  | 0.98 |
| 2  | -8 | 15  | 7.49  | 1.02 |
| 2  | -8 | 15  | 7.63  | 0.92 |
| 2  | -8 | 15  | 7.76  | 0.95 |
| -2 | 8  | 15  | 7.69  | 0.93 |
| -2 | -8 | 15  | 7.74  | 0.86 |
| -2 | -8 | 15  | 8.41  | 0.77 |
| 2  | 8  | 15  | 7.61  | 0.81 |
| -2 | -8 | 15  | 7.45  | 0.94 |
| 3  | -8 | 15  | 3.09  | 0.97 |
| -3 | 8  | 15  | 3.24  | 0.80 |
| 3  | -8 | 15  | 1.30  | 0.59 |
| 3  | -8 | 15  | 2.69  | 0.67 |
| 3  | -8 | 15  | 1.71  | 0.65 |
| -3 | 8  | 15  | 3.42  | 0.82 |

## CIF S3

|    |    |     |       |      |
|----|----|-----|-------|------|
| -3 | 8  | 15  | 2.90  | 0.62 |
| 3  | -8 | 15  | 4.01  | 0.65 |
| -3 | 8  | 15  | 2.60  | 0.66 |
| -3 | 8  | 15  | 2.91  | 0.74 |
| -3 | -8 | 15  | 3.17  | 0.59 |
| -3 | 8  | -15 | 2.39  | 0.75 |
| -3 | -8 | 15  | 3.10  | 0.56 |
| -3 | 8  | -15 | 5.02  | 1.14 |
| 3  | 8  | 15  | 2.67  | 0.70 |
| -3 | -8 | 15  | 3.53  | 0.39 |
| 0  | -9 | -15 | 0.02  | 0.68 |
| 0  | 9  | 15  | 0.07  | 0.70 |
| 0  | 9  | 15  | -0.10 | 0.51 |
| 0  | -9 | 15  | -0.07 | 0.47 |
| 0  | -9 | 15  | 0.13  | 0.65 |
| 0  | 9  | 15  | -0.26 | 0.61 |
| 0  | -9 | 15  | -0.14 | 0.53 |
| 0  | -9 | 15  | -0.23 | 0.55 |
| 0  | -9 | 15  | -0.16 | 0.53 |
| 0  | 9  | 15  | 0.17  | 0.57 |
| 1  | -9 | 15  | 0.90  | 0.55 |
| 1  | -9 | 15  | 1.69  | 0.59 |
| 1  | -9 | 15  | 0.73  | 0.51 |
| -1 | 9  | 15  | 1.05  | 0.57 |
| -1 | -9 | -15 | 3.04  | 0.86 |
| 1  | -9 | 15  | 0.59  | 0.42 |
| -1 | 9  | 15  | 0.80  | 0.60 |
| 1  | -9 | 15  | 1.13  | 0.52 |
| -1 | 9  | 15  | 0.76  | 0.61 |
| 1  | -9 | 15  | 0.75  | 0.55 |
| 1  | 9  | 15  | 1.29  | 0.54 |
| 1  | 9  | 15  | 1.19  | 0.33 |
| 1  | 9  | 15  | 1.36  | 0.71 |
| -1 | -9 | 15  | 1.21  | 0.52 |
| 2  | -9 | 15  | 2.93  | 0.82 |
| 2  | -9 | 15  | 3.28  | 0.91 |
| 2  | -9 | 15  | 5.03  | 1.02 |
| -2 | 9  | 15  | 5.57  | 0.90 |
| 2  | -9 | 15  | 5.07  | 0.63 |
| -2 | 9  | 15  | 3.97  | 0.83 |
| 2  | -9 | 15  | 6.64  | 0.97 |

## CIF S3

|    |     |     |       |      |
|----|-----|-----|-------|------|
| 2  | 9   | 15  | 4.35  | 0.58 |
| 2  | 9   | 15  | 4.75  | 0.78 |
| -2 | -9  | 15  | 3.93  | 0.70 |
| -2 | -9  | 15  | 4.68  | 0.66 |
| -3 | 9   | 15  | 11.41 | 0.97 |
| 3  | -9  | 15  | 11.60 | 0.92 |
| -3 | 9   | 15  | 10.40 | 0.93 |
| 3  | -9  | 15  | 13.21 | 0.99 |
| -3 | 9   | 15  | 11.08 | 0.91 |
| -3 | 9   | 15  | 11.65 | 0.98 |
| -3 | -9  | -15 | 12.55 | 1.07 |
| -3 | -9  | 15  | 11.47 | 0.77 |
| 3  | 9   | 15  | 13.37 | 0.91 |
| -3 | 9   | -15 | 11.57 | 1.13 |
| -3 | -9  | 15  | 12.85 | 0.77 |
| -3 | 9   | -15 | 12.43 | 1.17 |
| -4 | 9   | 15  | 4.67  | 0.58 |
| -4 | 9   | 15  | 4.56  | 0.64 |
| 4  | -9  | 15  | 5.08  | 0.80 |
| -4 | 9   | 15  | 4.73  | 0.51 |
| 4  | -9  | 15  | 3.55  | 0.77 |
| 4  | 9   | 15  | 4.69  | 0.59 |
| -4 | -9  | 15  | 5.01  | 0.35 |
| -4 | -9  | 15  | 5.09  | 0.35 |
| 4  | -9  | -15 | 4.67  | 0.91 |
| -4 | 9   | -15 | 4.75  | 0.84 |
| 0  | -10 | -15 | 1.24  | 0.43 |
| 0  | 10  | 15  | 0.09  | 0.48 |
| 0  | 10  | 15  | 2.07  | 0.45 |
| 0  | -10 | 15  | 1.68  | 0.43 |
| 0  | -10 | 15  | 2.43  | 0.53 |
| 0  | -10 | 15  | 1.11  | 0.40 |
| 0  | 10  | 15  | 0.81  | 0.58 |
| 1  | -10 | 15  | 4.88  | 0.73 |
| 1  | -10 | 15  | 3.18  | 0.64 |
| 1  | -10 | 15  | 5.26  | 1.04 |
| 1  | -10 | 15  | 3.14  | 0.77 |
| -1 | 10  | 15  | 4.53  | 0.86 |
| -1 | 10  | 15  | 4.31  | 0.81 |
| -1 | 10  | 15  | 4.38  | 0.71 |
| -1 | -10 | 15  | 4.22  | 0.69 |

## CIF S3

|    |     |     |       |      |
|----|-----|-----|-------|------|
| 1  | -10 | -15 | 3.79  | 0.85 |
| 1  | 10  | 15  | 4.46  | 0.84 |
| 1  | 10  | 15  | 5.64  | 0.73 |
| -1 | -10 | 15  | 3.99  | 0.75 |
| 1  | 10  | 15  | 4.65  | 0.42 |
| -2 | -10 | -15 | 2.46  | 0.64 |
| -2 | 10  | 15  | 3.99  | 0.72 |
| 2  | -10 | 15  | 2.62  | 0.74 |
| -2 | 10  | 15  | 2.95  | 0.78 |
| 2  | -10 | 15  | 3.09  | 0.65 |
| 2  | 10  | 15  | 3.24  | 0.75 |
| -2 | -10 | 15  | 3.86  | 0.59 |
| -2 | -10 | 15  | 3.31  | 0.49 |
| 2  | -10 | -15 | 3.14  | 0.84 |
| 2  | -10 | -15 | 3.05  | 0.72 |
| 2  | 10  | 15  | 3.70  | 0.46 |
| -2 | -10 | 15  | 3.11  | 0.74 |
| -3 | -10 | -15 | 11.51 | 0.72 |
| -3 | 10  | 15  | 11.92 | 0.80 |
| 3  | -10 | 15  | 10.34 | 0.88 |
| -3 | 10  | 15  | 11.79 | 0.92 |
| -3 | 10  | 15  | 12.52 | 1.03 |
| -3 | 10  | 15  | 12.76 | 1.04 |
| -3 | -10 | 15  | 11.93 | 0.82 |
| 3  | -10 | -15 | 15.43 | 0.97 |
| -3 | 10  | -15 | 12.38 | 0.92 |
| -3 | -10 | 15  | 12.44 | 0.71 |
| 3  | 10  | 15  | 12.04 | 0.86 |
| 0  | 11  | 15  | 4.00  | 0.59 |
| 0  | -11 | 15  | 4.40  | 0.81 |
| 0  | -11 | 15  | 4.65  | 0.60 |
| 1  | -11 | 15  | 1.17  | 0.37 |
| -1 | 11  | 15  | 1.01  | 0.42 |
| -1 | 11  | 15  | 2.71  | 0.66 |
| 1  | -11 | 15  | 2.47  | 0.66 |
| 1  | 11  | 15  | 2.57  | 0.62 |
| -1 | -11 | 15  | 3.26  | 0.51 |
| -1 | -11 | 15  | 2.60  | 0.47 |
| 0  | 0   | 16  | 22.67 | 1.53 |
| 0  | 0   | 16  | 21.17 | 1.47 |
| 0  | 0   | 16  | 21.53 | 1.75 |

## CIF S3

|    |   |     |       |      |
|----|---|-----|-------|------|
| 0  | 0 | 16  | 24.55 | 1.42 |
| 0  | 0 | 16  | 20.87 | 1.43 |
| -1 | 0 | 16  | 0.54  | 0.48 |
| -1 | 0 | 16  | 0.31  | 0.46 |
| -1 | 0 | 16  | 1.18  | 0.68 |
| 1  | 0 | 16  | 0.29  | 0.62 |
| 1  | 0 | 16  | 0.16  | 1.00 |
| -1 | 0 | 16  | 0.28  | 0.44 |
| 1  | 0 | 16  | -0.82 | 0.53 |
| 1  | 0 | 16  | 0.14  | 0.32 |
| 1  | 0 | 16  | 0.44  | 0.57 |
| -1 | 0 | 16  | -0.28 | 0.42 |
| 2  | 0 | 16  | 0.55  | 0.47 |
| -2 | 0 | 16  | 0.20  | 0.39 |
| 2  | 0 | 16  | -0.07 | 0.56 |
| 2  | 0 | 16  | 0.17  | 0.57 |
| -2 | 0 | 16  | 0.62  | 0.39 |
| 2  | 0 | 16  | -0.34 | 0.52 |
| -2 | 0 | 16  | 0.40  | 0.64 |
| -2 | 0 | 16  | 0.15  | 0.68 |
| 2  | 0 | 16  | 0.54  | 0.71 |
| -2 | 0 | 16  | -0.14 | 0.43 |
| 2  | 0 | 16  | 0.07  | 0.42 |
| -3 | 0 | -16 | 1.46  | 1.01 |
| -3 | 0 | 16  | 0.90  | 0.48 |
| 3  | 0 | 16  | 1.28  | 0.63 |
| -3 | 0 | 16  | 1.12  | 0.58 |
| 3  | 0 | 16  | 0.21  | 0.37 |
| -3 | 0 | 16  | 0.81  | 0.39 |
| -3 | 0 | 16  | 1.19  | 0.38 |
| -3 | 0 | 16  | 2.14  | 0.80 |
| -4 | 0 | 16  | 0.45  | 0.37 |
| -4 | 0 | 16  | 0.22  | 0.28 |
| -4 | 0 | 16  | 0.40  | 0.27 |
| -4 | 0 | 16  | 0.46  | 0.81 |
| -4 | 0 | 16  | 0.50  | 0.46 |
| -4 | 0 | -16 | 0.29  | 0.93 |
| -5 | 0 | 16  | 0.16  | 0.23 |
| -5 | 0 | 16  | 0.19  | 0.23 |
| -5 | 0 | 16  | 0.42  | 0.81 |
| -5 | 0 | -16 | -1.07 | 0.99 |



## CIF S3

|    |    |     |       |      |
|----|----|-----|-------|------|
| -6 | 0  | -16 | -0.11 | 0.86 |
| -6 | 0  | -16 | -0.01 | 0.44 |
| -7 | 0  | -16 | 0.59  | 0.48 |
| -7 | 0  | -16 | -0.09 | 0.62 |
| 0  | -1 | 16  | 5.43  | 0.74 |
| 0  | -1 | 16  | 4.67  | 0.84 |
| 0  | -1 | 16  | 3.90  | 0.82 |
| 0  | 1  | 16  | 3.92  | 0.88 |
| 0  | -1 | 16  | 4.75  | 0.81 |
| 0  | 1  | 16  | 5.12  | 0.84 |
| 0  | -1 | 16  | 4.80  | 0.85 |
| 0  | 1  | 16  | 5.02  | 0.87 |
| 0  | 1  | 16  | 4.24  | 0.84 |
| -1 | 1  | 16  | 1.55  | 0.51 |
| 1  | -1 | 16  | 1.89  | 0.58 |
| 1  | -1 | 16  | 3.00  | 0.73 |
| 1  | -1 | 16  | 1.95  | 0.63 |
| -1 | 1  | 16  | 0.51  | 0.48 |
| -1 | 1  | 16  | 1.48  | 0.49 |
| 1  | -1 | 16  | 1.92  | 0.32 |
| -1 | 1  | 16  | 1.93  | 0.47 |
| 1  | -1 | 16  | 1.17  | 0.55 |
| -1 | 1  | 16  | 1.85  | 0.71 |
| -1 | -1 | 16  | 1.80  | 0.69 |
| 1  | 1  | 16  | 2.58  | 0.70 |
| -1 | -1 | 16  | 1.92  | 0.53 |
| -1 | -1 | 16  | 1.81  | 0.51 |
| -1 | -1 | 16  | 1.10  | 0.42 |
| 1  | 1  | 16  | 1.69  | 0.37 |
| 1  | 1  | 16  | 2.86  | 0.68 |
| 1  | 1  | 16  | 1.07  | 0.54 |
| 1  | 1  | 16  | 1.54  | 0.59 |
| -1 | -1 | 16  | 1.84  | 0.52 |
| 2  | -1 | 16  | 8.97  | 1.13 |
| 2  | -1 | 16  | 9.50  | 1.41 |
| 2  | -1 | 16  | 6.87  | 0.92 |
| -2 | 1  | 16  | 9.43  | 0.88 |
| 2  | -1 | 16  | 8.74  | 1.02 |
| -2 | 1  | 16  | 9.20  | 0.89 |
| -2 | 1  | 16  | 8.83  | 0.77 |
| -2 | 1  | 16  | 9.95  | 1.06 |

## CIF S3

|    |    |     |       |      |
|----|----|-----|-------|------|
| 2  | -1 | 16  | 8.75  | 1.05 |
| 2  | 1  | 16  | 8.01  | 1.02 |
| -2 | -1 | 16  | 10.37 | 1.04 |
| -2 | -1 | 16  | 9.31  | 0.86 |
| 2  | 1  | 16  | 8.36  | 0.92 |
| 2  | 1  | 16  | 10.10 | 1.02 |
| -2 | 1  | -16 | 8.30  | 1.66 |
| -2 | -1 | 16  | 10.39 | 0.82 |
| -2 | -1 | 16  | 9.88  | 1.04 |
| 2  | 1  | 16  | 6.89  | 1.35 |
| -2 | -1 | 16  | 10.53 | 1.12 |
| -3 | 1  | 16  | 4.29  | 0.73 |
| -3 | 1  | 16  | 4.21  | 0.83 |
| 3  | -1 | 16  | 5.92  | 0.95 |
| -3 | 1  | 16  | 7.23  | 1.07 |
| -3 | 1  | 16  | 4.99  | 0.78 |
| 3  | -1 | 16  | 4.06  | 1.11 |
| -3 | 1  | 16  | 5.59  | 0.75 |
| 3  | -1 | 16  | 4.74  | 0.93 |
| 3  | 1  | 16  | 2.83  | 1.04 |
| 3  | 1  | 16  | 3.94  | 0.83 |
| -3 | 1  | -16 | 5.49  | 1.09 |
| -3 | -1 | 16  | 5.27  | 0.80 |
| -3 | -1 | 16  | 2.96  | 0.66 |
| -3 | -1 | 16  | 6.80  | 0.94 |
| -3 | -1 | 16  | 4.85  | 0.65 |
| -4 | 1  | 16  | 3.19  | 0.57 |
| -4 | 1  | 16  | 2.69  | 0.85 |
| -4 | 1  | 16  | 3.02  | 0.54 |
| -4 | 1  | 16  | 2.73  | 0.66 |
| -4 | 1  | 16  | 2.76  | 0.56 |
| -4 | 1  | 16  | 2.39  | 0.52 |
| -4 | -1 | -16 | 2.28  | 1.07 |
| -4 | -1 | 16  | 3.46  | 0.59 |
| -4 | 1  | -16 | 3.99  | 1.05 |
| -4 | -1 | 16  | 3.44  | 0.51 |
| -4 | -1 | 16  | 3.08  | 0.42 |
| -4 | -1 | 16  | 3.55  | 0.90 |
| -4 | -1 | 16  | 3.02  | 0.57 |
| -5 | 1  | 16  | 1.35  | 0.30 |
| -5 | -1 | -16 | 2.00  | 0.97 |

## CIF S3

|    |    |     |       |      |
|----|----|-----|-------|------|
| -5 | -1 | 16  | 1.74  | 0.35 |
| -5 | -1 | 16  | 2.18  | 0.36 |
| -5 | 1  | -16 | 1.84  | 0.93 |
| -5 | -1 | 16  | 1.76  | 0.76 |
| -6 | 1  | 16  | 2.27  | 0.25 |
| -6 | -1 | -16 | 1.54  | 0.42 |
| -6 | -1 | -16 | 1.44  | 0.81 |
| -6 | 1  | 16  | 1.84  | 0.25 |
| -6 | 1  | -16 | 0.29  | 0.85 |
| -6 | 1  | -16 | 2.95  | 0.69 |
| -6 | 1  | -16 | 1.10  | 0.84 |
| -7 | -1 | -16 | 0.89  | 0.67 |
| -7 | -1 | -16 | -0.11 | 0.32 |
| -7 | 1  | -16 | 0.38  | 0.47 |
| -7 | 1  | -16 | -0.45 | 0.60 |
| 0  | -2 | 16  | 5.61  | 0.86 |
| 0  | 2  | 16  | 5.71  | 0.89 |
| 0  | -2 | 16  | 5.91  | 0.89 |
| 0  | -2 | 16  | 5.49  | 0.85 |
| 0  | -2 | 16  | 5.35  | 0.82 |
| 0  | 2  | 16  | 4.72  | 0.87 |
| 0  | 2  | 16  | 5.45  | 0.88 |
| 0  | -2 | 16  | 5.29  | 1.05 |
| 0  | 2  | 16  | 5.81  | 0.88 |
| 1  | -2 | 16  | 14.46 | 1.12 |
| -1 | 2  | 16  | 15.37 | 1.03 |
| 1  | -2 | 16  | 13.40 | 1.10 |
| 1  | -2 | 16  | 12.47 | 1.26 |
| 1  | -2 | 16  | 12.31 | 1.06 |
| -1 | 2  | 16  | 13.59 | 1.19 |
| -1 | 2  | 16  | 13.41 | 1.07 |
| 1  | -2 | 16  | 13.45 | 1.13 |
| -1 | 2  | 16  | 12.76 | 1.08 |
| -1 | 2  | 16  | 13.55 | 1.09 |
| 1  | 2  | 16  | 12.76 | 1.16 |
| -1 | -2 | 16  | 12.73 | 1.11 |
| -1 | -2 | 16  | 13.17 | 1.01 |
| -1 | -2 | 16  | 12.81 | 1.04 |
| 1  | 2  | 16  | 12.27 | 1.07 |
| 1  | 2  | 16  | 14.00 | 1.15 |
| 1  | 2  | 16  | 12.32 | 1.60 |

## CIF S3

|    |    |     |       |      |
|----|----|-----|-------|------|
| -1 | -2 | 16  | 14.10 | 1.03 |
| 1  | 2  | 16  | 13.28 | 1.18 |
| -1 | -2 | 16  | 13.92 | 1.22 |
| -1 | -2 | 16  | 13.44 | 1.18 |
| 1  | 2  | 16  | 13.93 | 0.92 |
| -2 | 2  | 16  | 2.73  | 0.69 |
| -2 | 2  | 16  | 4.71  | 0.81 |
| -2 | 2  | 16  | 4.98  | 0.70 |
| 2  | -2 | 16  | 4.20  | 1.07 |
| 2  | -2 | 16  | 5.76  | 1.02 |
| 2  | -2 | 16  | 6.75  | 0.93 |
| -2 | 2  | 16  | 4.88  | 0.90 |
| 2  | -2 | 16  | 4.66  | 0.94 |
| 2  | -2 | 16  | 4.29  | 1.21 |
| -2 | 2  | 16  | 4.65  | 0.89 |
| -2 | 2  | 16  | 3.41  | 0.83 |
| -2 | -2 | 16  | 5.00  | 1.02 |
| 2  | 2  | 16  | 3.15  | 1.22 |
| -2 | -2 | 16  | 3.94  | 0.69 |
| -2 | 2  | -16 | 5.26  | 1.14 |
| 2  | 2  | 16  | 3.18  | 0.96 |
| 2  | 2  | 16  | 7.12  | 1.08 |
| -2 | -2 | 16  | 5.02  | 0.72 |
| 2  | 2  | 16  | 6.61  | 0.94 |
| -2 | -2 | 16  | 4.87  | 0.93 |
| -3 | 2  | 16  | 3.19  | 0.84 |
| 3  | -2 | 16  | 2.38  | 1.16 |
| 3  | -2 | 16  | 4.72  | 0.97 |
| -3 | 2  | 16  | 3.49  | 0.80 |
| 3  | -2 | 16  | 3.65  | 0.91 |
| -3 | 2  | 16  | 2.67  | 0.52 |
| -3 | 2  | 16  | 3.56  | 0.66 |
| -3 | -2 | 16  | 3.73  | 0.62 |
| -3 | -2 | 16  | 3.03  | 0.64 |
| 3  | 2  | 16  | 2.81  | 0.71 |
| -3 | -2 | 16  | 3.78  | 0.99 |
| -3 | -2 | 16  | 3.02  | 0.58 |
| -3 | 2  | -16 | 3.39  | 1.03 |
| -3 | -2 | 16  | 2.95  | 0.62 |
| -4 | 2  | 16  | 2.14  | 0.83 |
| -4 | 2  | 16  | 5.01  | 0.61 |

## CIF S3

|    |    |     |       |      |
|----|----|-----|-------|------|
| -4 | 2  | 16  | 4.33  | 0.72 |
| -4 | 2  | 16  | 4.27  | 0.79 |
| -4 | 2  | 16  | 3.86  | 0.64 |
| -4 | -2 | -16 | 6.78  | 2.01 |
| 4  | -2 | 16  | 6.34  | 0.93 |
| -4 | 2  | -16 | 3.58  | 0.98 |
| -4 | -2 | 16  | 5.07  | 0.53 |
| -4 | -2 | 16  | 5.76  | 0.40 |
| -4 | -2 | 16  | 5.04  | 1.02 |
| -5 | -2 | -16 | 20.30 | 1.79 |
| -5 | 2  | 16  | 22.42 | 1.26 |
| -5 | -2 | 16  | 23.63 | 1.19 |
| -5 | -2 | 16  | 21.86 | 1.58 |
| -5 | 2  | -16 | 24.48 | 1.78 |
| -5 | -2 | 16  | 23.89 | 1.21 |
| -5 | -2 | 16  | 23.00 | 1.21 |
| -5 | 2  | -16 | 23.69 | 1.64 |
| -6 | 2  | 16  | 5.97  | 0.41 |
| -6 | -2 | -16 | 6.26  | 0.61 |
| -6 | -2 | -16 | 4.75  | 1.14 |
| -6 | 2  | 16  | 6.35  | 0.44 |
| -6 | 2  | 16  | 5.57  | 0.43 |
| -6 | 2  | -16 | 6.94  | 0.74 |
| -6 | 2  | -16 | 5.10  | 1.21 |
| -6 | 2  | -16 | 5.37  | 1.01 |
| -7 | -2 | -16 | 4.41  | 0.61 |
| -7 | -2 | -16 | 6.01  | 0.88 |
| -7 | 2  | -16 | 4.08  | 0.69 |
| -7 | 2  | -16 | 4.53  | 0.90 |
| 0  | -3 | 16  | 0.53  | 0.71 |
| 0  | -3 | 16  | 0.96  | 0.64 |
| 0  | -3 | 16  | 0.39  | 0.48 |
| 0  | -3 | 16  | 0.15  | 0.62 |
| 0  | 3  | 16  | 0.66  | 0.57 |
| 0  | 3  | 16  | -0.10 | 0.63 |
| 0  | -3 | 16  | 0.37  | 0.39 |
| 0  | 3  | 16  | 0.60  | 0.54 |
| 0  | -3 | 16  | 0.30  | 0.53 |
| 0  | 3  | 16  | 0.64  | 0.59 |
| -1 | 3  | 16  | 0.03  | 0.50 |
| -1 | 3  | 16  | -0.27 | 0.47 |

## CIF S3

|    |    |     |       |      |
|----|----|-----|-------|------|
| 1  | -3 | 16  | -0.33 | 0.51 |
| -1 | 3  | 16  | 0.72  | 0.67 |
| 1  | -3 | 16  | -0.05 | 0.75 |
| -1 | 3  | 16  | -0.18 | 0.58 |
| 1  | -3 | 16  | -0.23 | 0.52 |
| 1  | -3 | 16  | 0.24  | 0.54 |
| -1 | 3  | 16  | 0.05  | 0.50 |
| -1 | 3  | 16  | 0.32  | 0.58 |
| 1  | -3 | 16  | -0.49 | 0.72 |
| 1  | 3  | 16  | 0.16  | 0.43 |
| 1  | 3  | 16  | -0.09 | 0.38 |
| -1 | -3 | 16  | 0.06  | 0.44 |
| -1 | -3 | 16  | 0.35  | 0.62 |
| 1  | 3  | 16  | 0.83  | 0.57 |
| -1 | -3 | 16  | 0.68  | 0.68 |
| -1 | -3 | 16  | 0.07  | 0.51 |
| 1  | 3  | 16  | 0.16  | 0.59 |
| 1  | 3  | 16  | -0.12 | 0.55 |
| 1  | 3  | 16  | -0.19 | 0.54 |
| -1 | -3 | 16  | 0.00  | 0.45 |
| -2 | 3  | 16  | 1.48  | 0.63 |
| 2  | -3 | 16  | 2.62  | 0.80 |
| -2 | 3  | 16  | 2.50  | 0.71 |
| -2 | 3  | 16  | 2.45  | 0.56 |
| -2 | 3  | 16  | 2.67  | 0.64 |
| 2  | -3 | 16  | 2.87  | 0.86 |
| 2  | -3 | 16  | 3.63  | 0.86 |
| -2 | 3  | 16  | 2.80  | 0.57 |
| -2 | 3  | 16  | 1.95  | 0.53 |
| 2  | -3 | 16  | 2.79  | 1.25 |
| -2 | -3 | 16  | 2.60  | 0.67 |
| -2 | -3 | 16  | 2.20  | 0.70 |
| -2 | -3 | 16  | 2.66  | 0.65 |
| -2 | 3  | -16 | 3.74  | 1.14 |
| 2  | 3  | 16  | 3.44  | 0.89 |
| 2  | 3  | 16  | 4.55  | 0.88 |
| 3  | -3 | 16  | 9.16  | 1.27 |
| -3 | 3  | 16  | 11.58 | 0.92 |
| -3 | 3  | 16  | 10.03 | 1.01 |
| -3 | 3  | 16  | 11.28 | 0.95 |
| 3  | -3 | 16  | 10.61 | 1.02 |

## CIF S3

|    |    |     |       |      |
|----|----|-----|-------|------|
| 3  | -3 | 16  | 12.08 | 1.18 |
| -3 | 3  | 16  | 11.48 | 0.97 |
| -3 | -3 | 16  | 12.05 | 0.86 |
| -3 | -3 | 16  | 9.86  | 0.79 |
| -3 | -3 | 16  | 10.81 | 0.79 |
| -3 | 3  | -16 | 9.93  | 1.65 |
| -3 | -3 | 16  | 12.58 | 0.99 |
| -3 | -3 | 16  | 12.87 | 1.22 |
| 3  | 3  | 16  | 7.06  | 1.43 |
| -4 | 3  | 16  | 0.45  | 0.42 |
| -4 | 3  | 16  | 0.58  | 0.37 |
| 4  | -3 | 16  | 1.15  | 0.54 |
| -4 | -3 | -16 | 0.41  | 0.57 |
| -4 | 3  | 16  | 0.53  | 0.37 |
| -4 | 3  | -16 | 0.67  | 0.94 |
| -4 | -3 | 16  | 0.62  | 0.77 |
| -4 | 3  | -16 | 1.74  | 0.84 |
| -4 | -3 | 16  | 0.77  | 0.28 |
| -5 | -3 | -16 | 3.46  | 0.94 |
| -5 | 3  | 16  | 3.63  | 0.41 |
| -5 | 3  | 16  | 3.36  | 0.57 |
| -5 | 3  | 16  | 3.04  | 0.59 |
| -5 | -3 | 16  | 2.51  | 0.33 |
| -5 | -3 | 16  | 3.62  | 0.35 |
| -5 | 3  | -16 | 2.34  | 0.87 |
| -5 | -3 | 16  | 2.88  | 0.29 |
| -5 | -3 | 16  | 3.86  | 1.14 |
| -5 | 3  | -16 | 3.80  | 1.14 |
| -6 | 3  | 16  | 2.32  | 0.35 |
| -6 | -3 | -16 | 2.71  | 0.79 |
| -6 | 3  | 16  | 3.17  | 0.37 |
| -6 | 3  | -16 | 3.69  | 0.98 |
| -6 | 3  | -16 | 2.32  | 0.76 |
| -6 | 3  | -16 | 2.41  | 0.62 |
| -7 | -3 | -16 | 6.67  | 0.91 |
| -7 | -3 | -16 | 3.85  | 0.66 |
| -7 | 3  | -16 | 3.54  | 0.84 |
| -7 | 3  | -16 | 6.70  | 0.96 |
| 0  | 4  | 16  | 20.26 | 1.08 |
| 0  | -4 | 16  | 21.05 | 1.17 |
| 0  | -4 | 16  | 21.34 | 1.43 |

## CIF S3

|    |    |    |       |      |
|----|----|----|-------|------|
| 0  | -4 | 16 | 19.39 | 1.30 |
| 0  | 4  | 16 | 22.84 | 2.52 |
| 0  | 4  | 16 | 21.84 | 1.44 |
| 0  | 4  | 16 | 20.85 | 1.44 |
| 0  | -4 | 16 | 21.21 | 1.40 |
| 0  | -4 | 16 | 20.75 | 1.54 |
| 0  | -4 | 16 | 20.08 | 1.40 |
| 0  | 4  | 16 | 21.11 | 1.37 |
| 0  | -4 | 16 | 21.27 | 1.39 |
| 1  | -4 | 16 | 0.36  | 0.51 |
| -1 | 4  | 16 | 0.54  | 0.56 |
| -1 | 4  | 16 | 0.89  | 0.56 |
| 1  | -4 | 16 | 1.74  | 0.63 |
| -1 | 4  | 16 | 1.08  | 0.66 |
| 1  | -4 | 16 | 1.98  | 0.54 |
| -1 | 4  | 16 | 1.15  | 0.53 |
| 1  | -4 | 16 | 1.51  | 0.59 |
| 1  | -4 | 16 | 1.26  | 0.71 |
| -1 | 4  | 16 | 1.86  | 0.55 |
| 1  | 4  | 16 | 1.57  | 0.62 |
| -1 | -4 | 16 | 2.80  | 0.77 |
| -1 | -4 | 16 | 1.33  | 0.50 |
| -1 | -4 | 16 | 2.15  | 0.52 |
| 1  | 4  | 16 | 0.68  | 0.60 |
| -1 | -4 | 16 | 2.31  | 0.53 |
| -1 | -4 | 16 | 3.03  | 0.77 |
| 1  | 4  | 16 | 0.33  | 0.48 |
| 1  | 4  | 16 | 1.52  | 0.41 |
| 1  | 4  | 16 | 1.68  | 0.58 |
| 2  | -4 | 16 | 17.80 | 1.38 |
| -2 | 4  | 16 | 18.31 | 1.25 |
| -2 | 4  | 16 | 18.17 | 1.28 |
| -2 | 4  | 16 | 18.71 | 1.27 |
| 2  | -4 | 16 | 17.79 | 1.29 |
| -2 | 4  | 16 | 15.93 | 1.30 |
| -2 | 4  | 16 | 17.95 | 1.19 |
| 2  | -4 | 16 | 17.70 | 1.59 |
| 2  | -4 | 16 | 18.15 | 1.35 |
| 2  | -4 | 16 | 18.88 | 1.30 |
| -2 | 4  | 16 | 16.25 | 1.32 |
| 2  | 4  | 16 | 16.85 | 1.29 |



## CIF S3

|    |    |     |       |      |
|----|----|-----|-------|------|
| 2  | 4  | 16  | 17.99 | 1.28 |
| -2 | -4 | 16  | 17.16 | 1.31 |
| -2 | -4 | 16  | 18.37 | 1.14 |
| -2 | -4 | 16  | 18.60 | 1.38 |
| -2 | -4 | 16  | 16.67 | 1.29 |
| -3 | 4  | 16  | 0.32  | 0.56 |
| -3 | 4  | 16  | 0.39  | 0.51 |
| -3 | 4  | 16  | -0.32 | 0.47 |
| 3  | -4 | 16  | 0.37  | 0.65 |
| 3  | -4 | 16  | -0.55 | 1.02 |
| 3  | -4 | 16  | -0.06 | 0.60 |
| 3  | -4 | 16  | 0.05  | 0.36 |
| -3 | 4  | 16  | 0.38  | 0.47 |
| -3 | 4  | 16  | -0.13 | 0.50 |
| -3 | 4  | -16 | 0.08  | 0.79 |
| -3 | -4 | 16  | 0.11  | 0.35 |
| -3 | -4 | 16  | -0.55 | 0.57 |
| -3 | -4 | 16  | -0.17 | 0.32 |
| -3 | -4 | 16  | 0.05  | 0.32 |
| -3 | 4  | -16 | -0.65 | 1.02 |
| -3 | -4 | 16  | 0.45  | 0.73 |
| -4 | 4  | 16  | -0.05 | 0.38 |
| 4  | -4 | 16  | 0.63  | 0.61 |
| -4 | 4  | 16  | 0.72  | 0.37 |
| -4 | 4  | 16  | 0.20  | 0.43 |
| -4 | 4  | -16 | 0.23  | 0.80 |
| -4 | -4 | 16  | 0.15  | 0.55 |
| -4 | -4 | 16  | -0.01 | 0.27 |
| -4 | 4  | -16 | -0.43 | 0.91 |
| -4 | -4 | 16  | -0.21 | 0.71 |
| -5 | 4  | 16  | 2.09  | 0.50 |
| -5 | 4  | 16  | 0.50  | 0.38 |
| -5 | -4 | -16 | 0.64  | 0.43 |
| -5 | 4  | 16  | 2.03  | 0.43 |
| -5 | 4  | -16 | 1.26  | 0.74 |
| -5 | -4 | 16  | 1.19  | 0.18 |
| -5 | -4 | 16  | 1.57  | 0.19 |
| -5 | 4  | -16 | 0.65  | 0.76 |
| -6 | 4  | 16  | 5.64  | 0.44 |
| -6 | 4  | 16  | 6.05  | 0.47 |
| -6 | -4 | -16 | 6.17  | 0.98 |

## CIF S3

|    |    |     |       |      |
|----|----|-----|-------|------|
| -6 | 4  | -16 | 5.59  | 0.62 |
| -6 | 4  | -16 | 6.69  | 1.02 |
| -6 | 4  | -16 | 6.05  | 0.97 |
| 0  | -5 | 16  | 4.14  | 0.85 |
| 0  | 5  | 16  | 3.88  | 0.96 |
| 0  | 5  | 16  | 4.27  | 0.96 |
| 0  | -5 | 16  | 1.86  | 0.77 |
| 0  | -5 | 16  | 4.82  | 0.87 |
| 0  | -5 | 16  | 4.45  | 0.94 |
| 0  | 5  | 16  | 4.99  | 0.43 |
| 0  | 5  | 16  | 4.84  | 0.86 |
| 0  | -5 | 16  | 5.37  | 0.78 |
| 1  | -5 | 16  | 24.50 | 1.67 |
| -1 | 5  | 16  | 27.78 | 1.64 |
| -1 | 5  | 16  | 27.66 | 1.58 |
| -1 | 5  | 16  | 26.63 | 1.64 |
| 1  | -5 | 16  | 25.61 | 1.64 |
| 1  | -5 | 16  | 26.78 | 1.52 |
| 1  | -5 | 16  | 25.10 | 1.59 |
| -1 | 5  | 16  | 26.15 | 1.64 |
| 1  | -5 | 16  | 27.08 | 1.59 |
| -1 | -5 | 16  | 26.06 | 1.55 |
| -1 | -5 | 16  | 24.85 | 1.59 |
| -1 | -5 | 16  | 23.91 | 1.68 |
| 1  | 5  | 16  | 24.77 | 1.60 |
| 1  | 5  | 16  | 26.02 | 1.68 |
| -1 | -5 | 16  | 27.53 | 1.71 |
| -1 | -5 | 16  | 27.32 | 1.52 |
| 1  | 5  | 16  | 26.13 | 1.46 |
| 1  | 5  | 16  | 27.74 | 1.71 |
| 2  | -5 | 16  | 3.36  | 0.87 |
| -2 | 5  | 16  | 2.90  | 0.78 |
| -2 | 5  | 16  | 1.94  | 0.84 |
| -2 | 5  | 16  | 3.00  | 0.62 |
| 2  | -5 | 16  | 3.59  | 0.98 |
| -2 | 5  | 16  | 4.36  | 0.83 |
| 2  | -5 | 16  | 4.92  | 1.16 |
| 2  | -5 | 16  | 3.84  | 1.02 |
| -2 | 5  | 16  | 3.51  | 0.94 |
| 2  | -5 | 16  | 4.77  | 0.88 |
| -2 | -5 | -16 | 4.79  | 1.32 |

## CIF S3

|    |    |     |      |      |
|----|----|-----|------|------|
| 2  | -5 | 16  | 6.92 | 1.45 |
| -2 | 5  | 16  | 3.09 | 0.88 |
| -2 | -5 | 16  | 4.23 | 0.85 |
| -2 | -5 | 16  | 3.29 | 0.82 |
| -2 | -5 | 16  | 4.52 | 0.77 |
| -2 | -5 | 16  | 3.78 | 0.56 |
| 2  | 5  | 16  | 3.07 | 0.67 |
| -3 | 5  | 16  | 1.80 | 0.49 |
| -3 | 5  | 16  | 1.97 | 0.54 |
| 3  | -5 | 16  | 2.60 | 0.72 |
| -3 | 5  | 16  | 1.92 | 0.50 |
| -3 | 5  | 16  | 2.40 | 0.54 |
| -3 | -5 | -16 | 3.10 | 0.91 |
| 3  | -5 | 16  | 2.50 | 0.73 |
| 3  | -5 | 16  | 0.86 | 0.36 |
| 3  | -5 | 16  | 1.80 | 1.15 |
| 3  | -5 | 16  | 3.32 | 0.87 |
| -3 | -5 | 16  | 1.74 | 0.73 |
| -3 | -5 | 16  | 2.08 | 0.56 |
| -3 | 5  | -16 | 1.45 | 0.99 |
| -3 | -5 | 16  | 2.17 | 0.49 |
| -3 | -5 | 16  | 1.58 | 0.36 |
| -3 | 5  | -16 | 1.90 | 0.81 |
| 4  | -5 | 16  | 4.68 | 0.92 |
| -4 | 5  | 16  | 4.92 | 0.76 |
| -4 | 5  | 16  | 4.27 | 0.68 |
| -4 | 5  | 16  | 4.37 | 0.66 |
| -4 | -5 | 16  | 4.99 | 0.48 |
| -4 | -5 | 16  | 4.62 | 0.55 |
| -4 | -5 | 16  | 6.05 | 0.96 |
| -4 | 5  | -16 | 4.63 | 1.36 |
| -4 | 5  | -16 | 4.48 | 1.14 |
| -5 | -5 | -16 | 2.98 | 0.60 |
| -5 | 5  | 16  | 3.73 | 0.47 |
| -5 | 5  | 16  | 3.64 | 0.65 |
| -5 | 5  | -16 | 2.55 | 0.73 |
| -5 | 5  | -16 | 3.67 | 0.78 |
| -6 | 5  | 16  | 0.77 | 0.21 |
| -6 | 5  | 16  | 0.63 | 0.22 |
| -6 | -5 | -16 | 0.93 | 0.60 |
| -6 | 5  | -16 | 0.36 | 0.56 |

## CIF S3

|    |    |     |       |      |
|----|----|-----|-------|------|
| -6 | 5  | -16 | 1.20  | 0.32 |
| 6  | 5  | 16  | 0.98  | 0.30 |
| -6 | 5  | -16 | 0.66  | 0.59 |
| 0  | 6  | 16  | -0.14 | 0.57 |
| 0  | -6 | 16  | -0.11 | 0.49 |
| 0  | -6 | 16  | 1.39  | 0.49 |
| 0  | -6 | 16  | 0.19  | 0.63 |
| 0  | 6  | 16  | 0.00  | 0.62 |
| 0  | 6  | 16  | 0.17  | 0.62 |
| 0  | -6 | 16  | 0.83  | 0.52 |
| -1 | 6  | 16  | 7.70  | 1.00 |
| 1  | -6 | 16  | 8.07  | 0.99 |
| 1  | -6 | 16  | 7.95  | 0.99 |
| 1  | -6 | 16  | 7.66  | 0.97 |
| -1 | 6  | 16  | 6.70  | 0.90 |
| 1  | -6 | 16  | 8.49  | 0.80 |
| -1 | 6  | 16  | 8.74  | 1.99 |
| 1  | -6 | 16  | 6.20  | 2.17 |
| 1  | -6 | 16  | 7.26  | 0.95 |
| -1 | 6  | 16  | 8.50  | 1.02 |
| -1 | 6  | 16  | 8.11  | 1.23 |
| 1  | -6 | 16  | 9.33  | 0.92 |
| 1  | 6  | 16  | 8.25  | 1.05 |
| -1 | -6 | 16  | 9.18  | 0.94 |
| -1 | -6 | 16  | 7.49  | 0.84 |
| 1  | 6  | 16  | 6.93  | 0.94 |
| -1 | -6 | 16  | 8.41  | 0.93 |
| 1  | 6  | 16  | 8.18  | 0.68 |
| -1 | -6 | 16  | 8.37  | 0.94 |
| -2 | 6  | 16  | 6.14  | 0.92 |
| -2 | -6 | -16 | 7.84  | 1.20 |
| 2  | -6 | 16  | 7.01  | 0.89 |
| 2  | -6 | 16  | 6.53  | 1.12 |
| 2  | -6 | 16  | 6.80  | 1.02 |
| -2 | 6  | 16  | 5.48  | 0.95 |
| 2  | -6 | 16  | 5.93  | 0.84 |
| 2  | -6 | 16  | 7.37  | 1.22 |
| -2 | 6  | 16  | 6.46  | 0.83 |
| -2 | 6  | 16  | 6.61  | 0.98 |
| -2 | 6  | 16  | 5.96  | 0.92 |
| -2 | -6 | 16  | 6.96  | 0.86 |

## CIF S3

|    |    |     |       |      |
|----|----|-----|-------|------|
| -2 | -6 | 16  | 6.77  | 0.97 |
| 2  | 6  | 16  | 6.81  | 1.00 |
| -2 | -6 | 16  | 6.71  | 0.80 |
| 3  | -6 | 16  | -0.14 | 0.62 |
| 3  | -6 | 16  | -0.02 | 0.28 |
| 3  | -6 | 16  | 0.14  | 0.57 |
| -3 | 6  | 16  | -0.33 | 0.46 |
| 3  | -6 | 16  | 0.38  | 0.83 |
| -3 | 6  | 16  | 0.43  | 0.48 |
| -3 | 6  | 16  | -0.14 | 0.49 |
| -3 | 6  | 16  | 0.05  | 0.48 |
| 3  | -6 | 16  | -0.02 | 0.67 |
| -3 | -6 | -16 | 0.27  | 0.48 |
| -3 | -6 | 16  | 0.80  | 0.33 |
| -3 | 6  | -16 | 0.63  | 0.93 |
| -3 | 6  | -16 | 0.55  | 0.77 |
| -3 | -6 | 16  | 0.65  | 0.67 |
| -3 | -6 | 16  | 0.56  | 0.27 |
| -3 | -6 | 16  | 0.56  | 0.34 |
| -4 | 6  | 16  | 1.31  | 0.45 |
| -4 | 6  | 16  | 1.77  | 0.43 |
| 4  | -6 | 16  | 1.65  | 0.58 |
| -4 | 6  | 16  | 1.18  | 0.63 |
| -4 | 6  | -16 | 1.53  | 0.86 |
| -4 | -6 | 16  | 2.78  | 0.39 |
| 4  | 6  | 16  | 2.45  | 0.64 |
| -4 | -6 | 16  | 2.25  | 0.44 |
| -4 | 6  | -16 | 2.84  | 0.76 |
| 5  | -6 | 16  | 1.09  | 0.45 |
| -5 | 6  | 16  | 1.26  | 0.39 |
| -5 | -6 | -16 | 0.88  | 0.22 |
| -5 | 6  | 16  | 1.23  | 0.29 |
| -5 | -6 | -16 | 1.15  | 0.32 |
| -5 | 6  | -16 | 0.96  | 0.68 |
| -5 | 6  | -16 | 3.20  | 0.92 |
| 5  | 6  | 16  | 2.04  | 0.59 |
| 0  | 7  | 16  | 0.09  | 0.67 |
| 0  | 7  | 16  | 0.04  | 0.61 |
| 0  | 7  | 16  | 0.10  | 0.58 |
| 0  | -7 | 16  | -0.11 | 0.50 |
| 0  | -7 | 16  | 0.15  | 0.63 |

## CIF S3

|    |    |     |      |      |
|----|----|-----|------|------|
| 0  | -7 | 16  | 0.49 | 0.47 |
| 0  | -7 | 16  | 0.14 | 0.55 |
| 0  | -7 | 16  | 0.49 | 0.46 |
| -1 | 7  | 16  | 4.57 | 0.86 |
| 1  | -7 | 16  | 5.97 | 0.89 |
| 1  | -7 | 16  | 4.85 | 0.52 |
| 1  | -7 | 16  | 5.75 | 1.34 |
| 1  | -7 | 16  | 5.80 | 0.87 |
| 1  | -7 | 16  | 6.20 | 1.01 |
| -1 | 7  | 16  | 4.55 | 0.97 |
| 1  | -7 | 16  | 6.72 | 0.78 |
| -1 | -7 | -16 | 4.97 | 1.21 |
| 1  | -7 | 16  | 5.62 | 0.91 |
| -1 | 7  | 16  | 6.05 | 0.94 |
| -1 | -7 | 16  | 5.78 | 0.92 |
| -1 | -7 | 16  | 6.95 | 0.86 |
| -1 | -7 | 16  | 5.69 | 0.74 |
| 1  | 7  | 16  | 6.64 | 0.59 |
| 1  | 7  | 16  | 6.39 | 1.02 |
| 1  | 7  | 16  | 5.67 | 0.88 |
| -2 | 7  | 16  | 1.17 | 0.54 |
| 2  | -7 | 16  | 1.49 | 0.49 |
| 2  | -7 | 16  | 0.91 | 0.56 |
| -2 | 7  | 16  | 0.91 | 0.52 |
| -2 | -7 | -16 | 1.69 | 0.62 |
| 2  | -7 | 16  | 2.67 | 1.09 |
| 2  | -7 | 16  | 2.38 | 0.64 |
| 2  | -7 | 16  | 1.92 | 0.72 |
| -2 | 7  | 16  | 0.95 | 0.48 |
| -2 | 7  | 16  | 2.05 | 0.63 |
| -2 | 7  | 16  | 1.87 | 0.55 |
| -2 | -7 | 16  | 2.49 | 0.66 |
| 2  | 7  | 16  | 1.33 | 0.40 |
| -2 | -7 | 16  | 1.61 | 0.67 |
| 2  | 7  | 16  | 0.59 | 0.59 |
| -2 | -7 | 16  | 1.56 | 0.44 |
| 3  | -7 | 16  | 5.09 | 0.94 |
| -3 | 7  | 16  | 4.66 | 0.87 |
| -3 | 7  | 16  | 4.57 | 0.86 |
| 3  | -7 | 16  | 5.39 | 1.07 |
| 3  | -7 | 16  | 3.20 | 0.80 |

## CIF S3

|    |    |     |       |      |
|----|----|-----|-------|------|
| 3  | -7 | 16  | 4.61  | 0.82 |
| -3 | 7  | 16  | 4.75  | 0.74 |
| -3 | 7  | 16  | 4.46  | 0.81 |
| -3 | 7  | 16  | 4.16  | 0.72 |
| 3  | -7 | 16  | 4.75  | 0.90 |
| -3 | -7 | 16  | 5.16  | 0.59 |
| -3 | 7  | -16 | 3.12  | 0.86 |
| -3 | -7 | 16  | 5.21  | 0.34 |
| 3  | 7  | 16  | 5.23  | 0.71 |
| -3 | -7 | 16  | 4.80  | 0.56 |
| -3 | 7  | -16 | 4.66  | 1.06 |
| -4 | -7 | -16 | 0.35  | 0.41 |
| -4 | 7  | 16  | -0.11 | 0.42 |
| -4 | 7  | 16  | 0.03  | 0.35 |
| 4  | -7 | 16  | -0.22 | 0.52 |
| -4 | -7 | 16  | 0.13  | 0.22 |
| -4 | 7  | -16 | 0.48  | 0.64 |
| -4 | 7  | -16 | 0.65  | 0.71 |
| 4  | 7  | 16  | 0.13  | 0.39 |
| -4 | -7 | 16  | 0.07  | 0.24 |
| -4 | -7 | 16  | 0.48  | 0.20 |
| -5 | 7  | 16  | 0.31  | 0.35 |
| -5 | 7  | 16  | 0.81  | 0.25 |
| 5  | -7 | 16  | 0.30  | 0.38 |
| -5 | 7  | -16 | 1.39  | 0.52 |
| 5  | 7  | 16  | 0.96  | 0.34 |
| -5 | 7  | -16 | 0.06  | 0.53 |
| 0  | 8  | 16  | 0.67  | 0.54 |
| 0  | -8 | 16  | 0.53  | 0.51 |
| 0  | 8  | 16  | 0.34  | 0.59 |
| 0  | 8  | 16  | 0.72  | 0.66 |
| 0  | -8 | -16 | 0.56  | 0.71 |
| 1  | -8 | 16  | 9.95  | 0.86 |
| -1 | 8  | 16  | 9.06  | 0.98 |
| -1 | 8  | 16  | 8.40  | 0.87 |
| 1  | -8 | 16  | 9.06  | 1.28 |
| 1  | -8 | 16  | 9.24  | 0.81 |
| 1  | -8 | 16  | 7.75  | 0.99 |
| 1  | -8 | 16  | 7.78  | 0.92 |
| -1 | -8 | -16 | 8.80  | 1.05 |
| -1 | 8  | 16  | 7.87  | 0.99 |

## CIF S3

|    |    |     |       |      |
|----|----|-----|-------|------|
| 1  | 8  | 16  | 9.53  | 1.04 |
| -1 | -8 | 16  | 8.52  | 0.89 |
| 1  | 8  | 16  | 8.48  | 0.61 |
| 2  | -8 | 16  | 1.51  | 0.37 |
| -2 | 8  | 16  | 1.10  | 0.59 |
| -2 | -8 | -16 | 1.30  | 0.58 |
| -2 | 8  | 16  | 0.69  | 0.47 |
| -2 | 8  | 16  | 0.43  | 0.48 |
| -2 | 8  | 16  | 0.84  | 0.58 |
| 2  | -8 | 16  | 0.50  | 0.33 |
| 2  | -8 | 16  | 0.82  | 0.52 |
| 2  | -8 | 16  | 0.22  | 0.61 |
| -2 | 8  | 16  | 0.59  | 0.50 |
| 2  | 8  | 16  | 0.79  | 0.63 |
| -2 | -8 | 16  | 0.69  | 0.37 |
| 2  | 8  | 16  | 0.54  | 0.32 |
| 2  | 8  | 16  | 0.72  | 0.47 |
| -2 | -8 | 16  | 1.01  | 0.41 |
| 3  | -8 | 16  | -0.17 | 0.39 |
| 3  | -8 | 16  | 0.17  | 0.54 |
| -3 | 8  | 16  | -0.23 | 0.52 |
| 3  | -8 | 16  | 0.09  | 0.58 |
| -3 | 8  | 16  | 0.56  | 0.42 |
| -3 | 8  | 16  | -0.30 | 0.45 |
| -3 | 8  | 16  | 0.37  | 0.39 |
| -3 | 8  | -16 | 0.28  | 0.62 |
| -3 | 8  | -16 | 1.33  | 0.67 |
| -3 | -8 | 16  | 0.16  | 0.38 |
| 3  | 8  | 16  | -0.27 | 0.34 |
| -3 | -8 | 16  | -0.14 | 0.26 |
| 3  | 8  | 16  | -0.04 | 0.41 |
| -4 | 8  | 16  | 4.94  | 0.64 |
| 4  | -8 | 16  | 3.61  | 0.69 |
| 4  | -8 | 16  | 5.34  | 0.69 |
| -4 | 8  | 16  | 4.33  | 0.53 |
| -4 | -8 | -16 | 5.34  | 0.49 |
| 4  | 8  | 16  | 4.21  | 0.58 |
| -4 | 8  | -16 | 3.46  | 0.86 |
| -4 | -8 | 16  | 5.23  | 0.33 |
| -4 | 8  | -16 | 5.39  | 0.87 |
| -4 | -8 | 16  | 5.16  | 0.33 |



## CIF S3

|    |    |     |       |      |
|----|----|-----|-------|------|
| 0  | -9 | 16  | 0.18  | 0.37 |
| 0  | -9 | 16  | -0.03 | 0.45 |
| 0  | 9  | 16  | -0.32 | 0.54 |
| 0  | 9  | 16  | 0.55  | 0.54 |
| 0  | -9 | -16 | 0.85  | 0.53 |
| 1  | -9 | 16  | 2.18  | 0.50 |
| 1  | -9 | 16  | 0.82  | 0.36 |
| 1  | -9 | 16  | 1.84  | 0.54 |
| -1 | -9 | -16 | 1.16  | 0.39 |
| -1 | 9  | 16  | 1.40  | 0.49 |
| -1 | 9  | 16  | 3.40  | 0.78 |
| 1  | -9 | 16  | 1.01  | 0.47 |
| -1 | -9 | 16  | 2.55  | 0.69 |
| 1  | 9  | 16  | 1.69  | 0.48 |
| 1  | -9 | -16 | 2.28  | 0.61 |
| 1  | 9  | 16  | 1.70  | 0.64 |
| -1 | -9 | 16  | 1.44  | 0.44 |
| 1  | -9 | -16 | 2.14  | 0.76 |
| -2 | 9  | 16  | 2.03  | 0.46 |
| -2 | 9  | 16  | 1.01  | 0.50 |
| -2 | 9  | 16  | 1.20  | 0.45 |
| 2  | -9 | 16  | 2.00  | 0.46 |
| 2  | -9 | 16  | 1.89  | 0.52 |
| -2 | 9  | -16 | 2.11  | 0.55 |
| -2 | -9 | 16  | 2.33  | 0.44 |
| 2  | 9  | 16  | 2.00  | 0.40 |
| -2 | 9  | -16 | 3.86  | 0.94 |
| -2 | -9 | 16  | 2.45  | 0.53 |
| -2 | -9 | 16  | 1.48  | 0.35 |
| 2  | 9  | 16  | 0.47  | 0.54 |
| 2  | 9  | 16  | 2.40  | 0.48 |
| -3 | -9 | -16 | 1.97  | 0.49 |
| -3 | 9  | 16  | 0.86  | 0.34 |
| 3  | -9 | 16  | 0.76  | 0.43 |
| 3  | -9 | 16  | 0.70  | 0.46 |
| -3 | 9  | 16  | 2.25  | 0.60 |
| -3 | 9  | 16  | 0.86  | 0.34 |
| 3  | 9  | 16  | 0.90  | 0.37 |
| 3  | 9  | 16  | 0.69  | 0.27 |
| 3  | -9 | -16 | 2.43  | 0.82 |
| -3 | -9 | 16  | 1.03  | 0.28 |

## CIF S3

|    |     |     |       |      |
|----|-----|-----|-------|------|
| -3 | 9   | -16 | 1.32  | 0.55 |
| -3 | -9  | 16  | 1.65  | 0.35 |
| -3 | 9   | -16 | 1.02  | 0.51 |
| 0  | 10  | 16  | 0.48  | 0.45 |
| 0  | -10 | 16  | -0.39 | 0.36 |
| 0  | 10  | 16  | -0.07 | 0.40 |
| 0  | -10 | 16  | -0.02 | 0.29 |
| 0  | 10  | 16  | 0.31  | 0.50 |
| -1 | 10  | 16  | 5.32  | 0.66 |
| 1  | -10 | 16  | 4.92  | 0.53 |
| -1 | 10  | 16  | 4.11  | 0.68 |
| 1  | -10 | 16  | 5.98  | 0.77 |
| 1  | -10 | 16  | 4.64  | 0.65 |
| 1  | 10  | 16  | 5.23  | 0.71 |
| 1  | -10 | -16 | 5.03  | 0.62 |
| -1 | -10 | 16  | 5.04  | 0.56 |
| 1  | 10  | 16  | 5.34  | 0.62 |
| -1 | -10 | 16  | 5.19  | 0.61 |
| -1 | -10 | 16  | 5.25  | 0.92 |
| 0  | 0   | 17  | -0.08 | 0.52 |
| 0  | 0   | 17  | 0.63  | 0.52 |
| 0  | 0   | 17  | 0.41  | 0.53 |
| 0  | 0   | 17  | -0.09 | 0.46 |
| 1  | 0   | 17  | 8.56  | 1.42 |
| 1  | 0   | 17  | 7.35  | 0.99 |
| -1 | 0   | 17  | 8.09  | 0.81 |
| -1 | 0   | 17  | 6.84  | 0.82 |
| 1  | 0   | 17  | 7.34  | 1.04 |
| -1 | 0   | 17  | 7.69  | 1.01 |
| -1 | 0   | 17  | 8.20  | 0.86 |
| -1 | 0   | 17  | 7.90  | 0.88 |
| 1  | 0   | 17  | 8.95  | 0.96 |
| 2  | 0   | 17  | -0.13 | 0.34 |
| 2  | 0   | 17  | -0.11 | 0.56 |
| -2 | 0   | 17  | 0.28  | 0.59 |
| 2  | 0   | 17  | -0.06 | 0.54 |
| 2  | 0   | 17  | -0.14 | 0.36 |
| -2 | 0   | 17  | 0.40  | 0.43 |
| -2 | 0   | 17  | 0.37  | 0.58 |
| -2 | 0   | 17  | 0.18  | 0.41 |
| 2  | 0   | 17  | 0.59  | 0.70 |

## CIF S3

|    |    |     |       |      |
|----|----|-----|-------|------|
| -3 | 0  | 17  | 25.29 | 1.82 |
| -3 | 0  | 17  | 26.87 | 1.51 |
| 3  | 0  | 17  | 30.27 | 1.70 |
| -3 | 0  | 17  | 27.21 | 1.74 |
| 3  | 0  | 17  | 26.24 | 1.50 |
| -3 | 0  | 17  | 27.80 | 1.53 |
| -3 | 0  | 17  | 28.17 | 1.46 |
| 3  | 0  | 17  | 25.68 | 1.65 |
| 3  | 0  | 17  | 25.64 | 1.76 |
| -3 | 0  | -17 | 28.10 | 1.94 |
| -4 | 0  | 17  | 2.80  | 0.46 |
| -4 | 0  | 17  | 2.41  | 0.39 |
| 4  | 0  | 17  | 2.70  | 0.64 |
| -4 | 0  | 17  | 2.82  | 0.44 |
| -4 | 0  | -17 | 2.01  | 0.92 |
| -4 | 0  | 17  | 4.15  | 0.95 |
| -5 | 0  | 17  | 0.00  | 0.22 |
| -5 | 0  | 17  | 0.08  | 0.20 |
| -5 | 0  | -17 | -0.56 | 0.84 |
| -6 | 0  | -17 | -0.97 | 0.68 |
| -6 | 0  | -17 | 0.09  | 0.32 |
| 0  | 1  | 17  | 0.34  | 0.50 |
| 0  | -1 | 17  | 0.78  | 0.51 |
| 0  | -1 | 17  | 0.42  | 0.47 |
| 0  | -1 | 17  | 0.00  | 0.51 |
| 0  | 1  | 17  | 0.07  | 0.47 |
| 0  | -1 | 17  | -0.62 | 0.59 |
| 0  | 1  | 17  | 0.32  | 0.48 |
| 0  | -1 | 17  | 0.33  | 0.75 |
| 0  | 1  | 17  | 0.15  | 0.49 |
| -1 | 1  | 17  | 5.38  | 0.80 |
| 1  | -1 | 17  | 5.56  | 0.87 |
| 1  | -1 | 17  | 2.88  | 0.72 |
| -1 | 1  | 17  | 5.52  | 0.85 |
| 1  | -1 | 17  | 3.87  | 0.74 |
| 1  | -1 | 17  | 4.15  | 0.89 |
| -1 | 1  | 17  | 5.05  | 0.99 |
| -1 | 1  | 17  | 5.03  | 0.76 |
| -1 | 1  | 17  | 5.57  | 0.81 |
| 1  | 1  | 17  | 5.26  | 0.41 |
| 1  | 1  | 17  | 4.28  | 0.94 |

## CIF S3

|    |    |    |       |      |
|----|----|----|-------|------|
| 1  | 1  | 17 | 5.24  | 1.34 |
| -1 | -1 | 17 | 5.39  | 0.82 |
| -1 | -1 | 17 | 4.23  | 0.98 |
| -1 | -1 | 17 | 5.88  | 0.72 |
| -1 | -1 | 17 | 4.70  | 0.80 |
| 1  | 1  | 17 | 4.88  | 0.86 |
| -1 | -1 | 17 | 5.17  | 0.72 |
| 1  | 1  | 17 | 5.22  | 0.91 |
| -2 | 1  | 17 | 7.24  | 0.87 |
| -2 | 1  | 17 | 7.23  | 0.73 |
| 2  | -1 | 17 | 7.52  | 1.33 |
| 2  | -1 | 17 | 8.71  | 1.10 |
| -2 | 1  | 17 | 7.42  | 0.98 |
| 2  | -1 | 17 | 7.66  | 0.95 |
| 2  | -1 | 17 | 8.02  | 0.62 |
| -2 | 1  | 17 | 7.53  | 0.85 |
| -2 | 1  | 17 | 7.96  | 0.82 |
| 2  | -1 | 17 | 8.71  | 0.95 |
| 2  | 1  | 17 | 7.52  | 1.23 |
| 2  | 1  | 17 | 7.60  | 0.99 |
| 2  | 1  | 17 | 9.16  | 1.14 |
| -2 | -1 | 17 | 7.98  | 1.05 |
| 2  | 1  | 17 | 7.90  | 0.70 |
| -2 | -1 | 17 | 8.32  | 0.83 |
| -2 | -1 | 17 | 8.77  | 1.00 |
| -2 | -1 | 17 | 8.12  | 0.76 |
| 2  | 1  | 17 | 7.72  | 0.95 |
| 3  | -1 | 17 | 20.13 | 1.46 |
| -3 | 1  | 17 | 18.94 | 1.17 |
| -3 | 1  | 17 | 19.63 | 1.26 |
| 3  | -1 | 17 | 20.10 | 1.19 |
| 3  | -1 | 17 | 18.47 | 1.35 |
| 3  | -1 | 17 | 20.71 | 1.40 |
| -3 | 1  | 17 | 20.80 | 1.23 |
| -3 | 1  | 17 | 20.76 | 1.43 |
| 3  | 1  | 17 | 20.28 | 1.39 |
| 3  | 1  | 17 | 17.25 | 1.48 |
| -3 | -1 | 17 | 20.50 | 1.17 |
| -3 | -1 | 17 | 20.46 | 1.49 |
| 3  | 1  | 17 | 22.66 | 1.39 |
| -3 | -1 | 17 | 19.89 | 1.16 |

## CIF S3

|    |    |     |       |      |
|----|----|-----|-------|------|
| -3 | -1 | 17  | 19.92 | 1.20 |
| -3 | 1  | -17 | 20.17 | 1.71 |
| -4 | 1  | 17  | 0.13  | 0.29 |
| -4 | 1  | 17  | 0.51  | 0.35 |
| 4  | -1 | 17  | 0.03  | 0.57 |
| -4 | -1 | -17 | 0.58  | 0.93 |
| -4 | 1  | 17  | -0.22 | 0.29 |
| -4 | -1 | 17  | 0.10  | 0.26 |
| -4 | -1 | 17  | 0.43  | 0.19 |
| -4 | -1 | 17  | 0.52  | 0.42 |
| -4 | 1  | -17 | 0.57  | 0.84 |
| -4 | -1 | 17  | -0.39 | 0.76 |
| -5 | -1 | -17 | 1.13  | 0.84 |
| -5 | 1  | 17  | 2.81  | 0.42 |
| -5 | 1  | 17  | 2.42  | 0.39 |
| -5 | -1 | 17  | 3.02  | 0.34 |
| -5 | -1 | 17  | 2.76  | 0.33 |
| -5 | 1  | -17 | 2.69  | 0.91 |
| -5 | -1 | 17  | 3.01  | 0.33 |
| -6 | -1 | -17 | 0.09  | 0.70 |
| -6 | -1 | -17 | 1.08  | 0.24 |
| -6 | 1  | -17 | 0.80  | 0.70 |
| -6 | 1  | -17 | 2.70  | 0.55 |
| 0  | 2  | 17  | 4.72  | 0.81 |
| 0  | 2  | 17  | 3.85  | 0.88 |
| 0  | 2  | 17  | 4.59  | 0.82 |
| 0  | -2 | 17  | 5.38  | 0.78 |
| 0  | -2 | 17  | 4.13  | 0.92 |
| 0  | 2  | 17  | 4.54  | 0.89 |
| 0  | -2 | 17  | 4.60  | 0.80 |
| 0  | -2 | 17  | 5.19  | 1.03 |
| 0  | -2 | 17  | 3.88  | 0.79 |
| -1 | 2  | 17  | 0.20  | 0.55 |
| 1  | -2 | 17  | 0.12  | 0.52 |
| 1  | -2 | 17  | 1.15  | 0.61 |
| -1 | 2  | 17  | -0.27 | 0.66 |
| -1 | 2  | 17  | 0.14  | 0.46 |
| -1 | 2  | 17  | 0.06  | 0.49 |
| 1  | -2 | 17  | 0.05  | 0.47 |
| 1  | -2 | 17  | 0.52  | 0.45 |
| -1 | 2  | 17  | 0.27  | 0.48 |

## CIF S3

|    |    |     |       |      |
|----|----|-----|-------|------|
| 1  | -2 | 17  | 0.16  | 0.60 |
| -1 | 2  | 17  | 0.70  | 0.55 |
| -1 | -2 | 17  | 0.59  | 0.49 |
| 1  | 2  | 17  | 0.15  | 0.56 |
| -1 | -2 | 17  | 1.38  | 0.69 |
| -1 | -2 | 17  | 0.26  | 0.66 |
| 1  | 2  | 17  | 0.28  | 0.43 |
| 1  | 2  | 17  | 0.02  | 0.53 |
| 1  | 2  | 17  | 0.11  | 0.26 |
| -1 | -2 | 17  | -0.15 | 0.41 |
| 1  | 2  | 17  | -0.19 | 0.52 |
| -1 | -2 | 17  | 0.57  | 0.46 |
| -2 | 2  | 17  | 7.88  | 1.08 |
| 2  | -2 | 17  | 12.95 | 1.18 |
| -2 | 2  | 17  | 10.41 | 0.96 |
| 2  | -2 | 17  | 10.75 | 1.05 |
| -2 | 2  | 17  | 10.65 | 1.05 |
| 2  | -2 | 17  | 14.14 | 1.07 |
| -2 | 2  | 17  | 11.66 | 1.02 |
| 2  | -2 | 17  | 11.31 | 0.69 |
| -2 | 2  | 17  | 11.43 | 0.87 |
| 2  | -2 | 17  | 10.66 | 1.39 |
| 2  | -2 | 17  | 9.42  | 1.01 |
| -2 | -2 | 17  | 11.23 | 1.07 |
| 2  | 2  | 17  | 12.41 | 1.09 |
| -2 | -2 | 17  | 11.09 | 0.89 |
| 2  | 2  | 17  | 11.80 | 1.10 |
| 2  | 2  | 17  | 9.50  | 1.35 |
| 2  | 2  | 17  | 11.55 | 0.82 |
| 2  | 2  | 17  | 9.52  | 1.06 |
| -2 | 2  | -17 | 11.22 | 1.60 |
| -2 | -2 | 17  | 12.61 | 1.17 |
| 3  | -2 | 17  | 0.07  | 0.55 |
| -3 | 2  | 17  | 0.95  | 0.45 |
| -3 | 2  | 17  | 0.67  | 0.45 |
| 3  | -2 | 17  | 0.16  | 0.32 |
| 3  | -2 | 17  | 0.85  | 0.53 |
| -3 | 2  | 17  | 0.33  | 0.55 |
| 3  | 2  | 17  | 0.66  | 0.54 |
| -3 | -2 | 17  | 0.80  | 0.33 |
| -3 | -2 | 17  | 0.85  | 0.31 |

## CIF S3

|    |    |     |       |      |
|----|----|-----|-------|------|
| -3 | 2  | -17 | 1.24  | 1.00 |
| -3 | -2 | 17  | 1.04  | 0.35 |
| -3 | -2 | 17  | 1.05  | 0.35 |
| -3 | -2 | 17  | 0.57  | 0.70 |
| -4 | 2  | 17  | 3.38  | 0.62 |
| -4 | 2  | 17  | 3.15  | 0.53 |
| -4 | 2  | 17  | 2.91  | 0.65 |
| -4 | 2  | 17  | 2.23  | 0.37 |
| 4  | -2 | 17  | 1.64  | 0.56 |
| -4 | -2 | 17  | 3.00  | 0.47 |
| -4 | -2 | 17  | 1.66  | 0.75 |
| -4 | 2  | -17 | 2.64  | 0.89 |
| -5 | -2 | -17 | 4.40  | 1.18 |
| -5 | 2  | 17  | 4.17  | 0.48 |
| -5 | -2 | 17  | 3.69  | 0.31 |
| -5 | -2 | 17  | 3.89  | 0.33 |
| -5 | 2  | -17 | 3.62  | 0.90 |
| -5 | -2 | 17  | 3.79  | 0.28 |
| -6 | -2 | -17 | 0.32  | 0.61 |
| -6 | 2  | -17 | 0.87  | 0.68 |
| -6 | 2  | -17 | 0.69  | 0.35 |
| -6 | 2  | -17 | 0.44  | 0.68 |
| 0  | 3  | 17  | -0.17 | 0.54 |
| 0  | 3  | 17  | -0.02 | 0.49 |
| 0  | -3 | 17  | 0.86  | 0.55 |
| 0  | 3  | 17  | 0.65  | 0.53 |
| 0  | -3 | 17  | -0.63 | 0.54 |
| 0  | -3 | 17  | 0.26  | 0.48 |
| 0  | 3  | 17  | 0.44  | 0.61 |
| 0  | -3 | 17  | -0.02 | 0.42 |
| 0  | 3  | 17  | -0.04 | 0.54 |
| 0  | -3 | 17  | -0.69 | 0.69 |
| -1 | 3  | 17  | 0.36  | 0.52 |
| -1 | 3  | 17  | -0.53 | 0.66 |
| -1 | 3  | 17  | 0.98  | 0.54 |
| 1  | -3 | 17  | 0.91  | 0.45 |
| 1  | -3 | 17  | 1.20  | 0.52 |
| 1  | -3 | 17  | 1.32  | 0.66 |
| 1  | -3 | 17  | -0.21 | 0.58 |
| -1 | 3  | 17  | 0.20  | 0.60 |
| -1 | 3  | 17  | 0.40  | 0.47 |

## CIF S3

|    |    |     |       |      |
|----|----|-----|-------|------|
| -1 | 3  | 17  | -0.04 | 0.51 |
| 1  | -3 | 17  | 1.37  | 0.47 |
| 1  | 3  | 17  | 0.84  | 0.60 |
| -1 | -3 | 17  | 0.15  | 0.64 |
| -1 | -3 | 17  | 0.56  | 0.68 |
| -1 | -3 | 17  | 1.42  | 0.50 |
| 1  | 3  | 17  | 0.20  | 0.54 |
| -1 | -3 | 17  | 1.19  | 0.45 |
| 1  | 3  | 17  | 1.06  | 0.53 |
| 1  | 3  | 17  | 0.80  | 0.29 |
| -1 | -3 | 17  | 0.43  | 0.40 |
| 1  | 3  | 17  | -0.13 | 0.43 |
| -2 | 3  | 17  | 6.22  | 0.91 |
| -2 | 3  | 17  | 2.56  | 0.92 |
| 2  | -3 | 17  | 5.88  | 1.24 |
| -2 | 3  | 17  | 6.71  | 0.74 |
| 2  | -3 | 17  | 5.47  | 0.78 |
| -2 | 3  | 17  | 4.87  | 1.10 |
| 2  | -3 | 17  | 7.78  | 0.89 |
| 2  | -3 | 17  | 6.42  | 0.92 |
| -2 | 3  | 17  | 7.40  | 0.92 |
| -2 | 3  | 17  | 7.46  | 0.84 |
| 2  | -3 | 17  | 5.83  | 1.08 |
| -2 | -3 | 17  | 6.56  | 0.90 |
| -2 | -3 | 17  | 7.17  | 0.75 |
| -2 | -3 | 17  | 5.44  | 0.97 |
| -2 | 3  | -17 | 6.86  | 1.52 |
| 2  | 3  | 17  | 5.36  | 0.89 |
| 2  | 3  | 17  | 6.24  | 0.87 |
| -2 | -3 | 17  | 4.19  | 0.86 |
| 2  | 3  | 17  | 7.36  | 0.71 |
| -3 | 3  | 17  | 11.49 | 0.90 |
| -3 | 3  | 17  | 10.26 | 1.08 |
| 3  | -3 | 17  | 12.66 | 1.03 |
| 3  | -3 | 17  | 11.06 | 1.07 |
| 3  | -3 | 17  | 10.45 | 1.16 |
| 3  | -3 | 17  | 9.33  | 1.14 |
| -3 | 3  | 17  | 10.17 | 0.94 |
| -3 | -3 | 17  | 12.11 | 0.81 |
| -3 | -3 | 17  | 10.52 | 0.79 |
| -3 | 3  | -17 | 9.56  | 1.49 |



## CIF S3

|    |    |     |       |      |
|----|----|-----|-------|------|
| 3  | 3  | 17  | 10.41 | 1.01 |
| -3 | -3 | 17  | 10.78 | 0.76 |
| -3 | -3 | 17  | 9.70  | 1.16 |
| -4 | 3  | 17  | 6.58  | 0.57 |
| 4  | -3 | 17  | 5.89  | 0.85 |
| -4 | 3  | 17  | 6.91  | 0.62 |
| -4 | 3  | 17  | 6.32  | 0.69 |
| -4 | -3 | 17  | 6.53  | 0.54 |
| -4 | -3 | 17  | 6.15  | 1.08 |
| -4 | 3  | -17 | 5.50  | 0.99 |
| -5 | 3  | 17  | 5.73  | 0.55 |
| -5 | -3 | -17 | 7.91  | 0.82 |
| -5 | 3  | -17 | 6.36  | 1.18 |
| -5 | 3  | -17 | 6.17  | 1.00 |
| -6 | 3  | 17  | 3.00  | 0.24 |
| -6 | 3  | 17  | 2.91  | 0.23 |
| -6 | -3 | -17 | 3.63  | 0.81 |
| -6 | 3  | -17 | 3.62  | 0.51 |
| -6 | 3  | -17 | 1.36  | 0.60 |
| -6 | 3  | -17 | 3.59  | 0.74 |
| 0  | 4  | 17  | 4.80  | 1.95 |
| 0  | 4  | 17  | 4.77  | 0.81 |
| 0  | 4  | 17  | 4.20  | 0.93 |
| 0  | -4 | 17  | 4.80  | 0.80 |
| 0  | -4 | 17  | 5.01  | 0.84 |
| 0  | 4  | 17  | 4.06  | 0.94 |
| 0  | -4 | 17  | 4.16  | 0.72 |
| 0  | -4 | 17  | 3.09  | 0.89 |
| 0  | -4 | 17  | 4.07  | 0.75 |
| -1 | 4  | 17  | 12.33 | 1.23 |
| -1 | 4  | 17  | 13.30 | 1.09 |
| -1 | 4  | 17  | 14.26 | 1.14 |
| 1  | -4 | 17  | 13.93 | 1.21 |
| 1  | -4 | 17  | 13.48 | 0.93 |
| 1  | -4 | 17  | 13.95 | 1.04 |
| -1 | 4  | 17  | 13.91 | 1.02 |
| 1  | -4 | 17  | 13.69 | 1.08 |
| 1  | -4 | 17  | 13.91 | 1.13 |
| -1 | 4  | 17  | 14.51 | 1.11 |
| 1  | 4  | 17  | 13.90 | 1.18 |
| -1 | -4 | 17  | 13.58 | 0.93 |

## CIF S3

|    |    |     |       |      |
|----|----|-----|-------|------|
| 1  | 4  | 17  | 13.11 | 1.09 |
| 1  | 4  | 17  | 13.63 | 1.15 |
| -1 | -4 | 17  | 12.53 | 1.13 |
| -1 | -4 | 17  | 12.92 | 1.00 |
| 1  | 4  | 17  | 9.34  | 1.59 |
| -1 | -4 | 17  | 12.50 | 1.00 |
| -1 | -4 | 17  | 10.44 | 1.24 |
| 1  | 4  | 17  | 14.29 | 0.80 |
| 2  | -4 | 17  | 4.12  | 1.01 |
| 2  | -4 | 17  | 4.05  | 0.82 |
| 2  | -4 | 17  | 3.29  | 1.15 |
| -2 | 4  | 17  | 4.26  | 0.91 |
| -2 | 4  | 17  | 3.99  | 0.80 |
| -2 | 4  | 17  | 3.15  | 0.68 |
| -2 | 4  | 17  | 4.72  | 0.86 |
| 2  | -4 | 17  | 5.13  | 0.78 |
| -2 | 4  | 17  | 4.76  | 0.79 |
| 2  | -4 | 17  | 4.41  | 1.00 |
| -2 | -4 | 17  | 4.77  | 0.70 |
| 2  | 4  | 17  | 4.08  | 0.91 |
| -2 | 4  | -17 | 6.45  | 1.48 |
| -2 | -4 | 17  | 4.18  | 0.94 |
| 2  | 4  | 17  | 4.95  | 0.83 |
| 2  | 4  | 17  | 4.42  | 0.65 |
| -2 | -4 | 17  | 3.36  | 0.67 |
| 3  | -4 | 17  | 3.81  | 0.89 |
| -3 | 4  | 17  | 2.86  | 0.74 |
| -3 | 4  | 17  | 3.73  | 0.78 |
| 3  | -4 | 17  | 2.68  | 0.73 |
| -3 | -4 | -17 | 2.06  | 0.71 |
| -3 | 4  | 17  | 3.55  | 0.68 |
| 3  | -4 | 17  | 2.05  | 0.94 |
| 3  | -4 | 17  | 3.18  | 0.82 |
| -3 | 4  | -17 | 4.92  | 1.38 |
| -3 | -4 | 17  | 2.67  | 0.56 |
| -3 | -4 | 17  | 3.89  | 0.79 |
| 3  | 4  | 17  | 3.78  | 0.87 |
| -3 | -4 | 17  | 3.10  | 0.47 |
| -3 | -4 | 17  | 3.61  | 0.56 |
| -4 | 4  | 17  | 3.92  | 0.54 |
| 4  | -4 | 17  | 4.76  | 0.79 |

## CIF S3

|    |    |     |       |      |
|----|----|-----|-------|------|
| -4 | 4  | 17  | 4.95  | 0.68 |
| -4 | 4  | 17  | 5.52  | 0.59 |
| -4 | 4  | -17 | 4.22  | 0.80 |
| -4 | -4 | 17  | 4.38  | 0.48 |
| -4 | 4  | -17 | 4.15  | 0.90 |
| -4 | -4 | 17  | 4.56  | 0.48 |
| -5 | 4  | 17  | 12.52 | 0.77 |
| -5 | 4  | 17  | 14.20 | 0.86 |
| -5 | -4 | -17 | 12.98 | 0.87 |
| -5 | 4  | -17 | 15.36 | 1.23 |
| -5 | 4  | -17 | 13.07 | 1.13 |
| -6 | 4  | 17  | 2.38  | 0.23 |
| -6 | 4  | 17  | 2.50  | 0.25 |
| -6 | 4  | -17 | 3.13  | 0.85 |
| -6 | 4  | -17 | 3.28  | 0.86 |
| -6 | 4  | -17 | 2.91  | 0.45 |
| 0  | -5 | 17  | 0.88  | 0.66 |
| 0  | -5 | 17  | 1.11  | 0.49 |
| 0  | -5 | 17  | 2.05  | 0.57 |
| 0  | -5 | 17  | 1.97  | 0.51 |
| 0  | 5  | 17  | 1.16  | 0.61 |
| 0  | 5  | 17  | 0.11  | 0.45 |
| 0  | -5 | 17  | 0.62  | 0.42 |
| 0  | 5  | 17  | 0.89  | 0.59 |
| 0  | 5  | 17  | 0.90  | 0.52 |
| 1  | -5 | 17  | 22.88 | 1.51 |
| 1  | -5 | 17  | 25.42 | 1.52 |
| -1 | 5  | 17  | 21.66 | 1.47 |
| 1  | -5 | 17  | 22.76 | 1.80 |
| 1  | -5 | 17  | 22.57 | 1.48 |
| -1 | 5  | 17  | 27.81 | 2.37 |
| 1  | -5 | 17  | 22.72 | 1.39 |
| -1 | 5  | 17  | 22.66 | 1.46 |
| 1  | -5 | 17  | 23.13 | 1.27 |
| -1 | 5  | 17  | 22.32 | 1.46 |
| -1 | 5  | 17  | 23.76 | 1.53 |
| 1  | 5  | 17  | 23.41 | 1.21 |
| 1  | 5  | 17  | 21.84 | 1.47 |
| 1  | 5  | 17  | 23.07 | 1.54 |
| -1 | -5 | 17  | 23.03 | 1.42 |
| -1 | -5 | 17  | 23.26 | 1.36 |

## CIF S3

|    |    |     |       |      |
|----|----|-----|-------|------|
| 1  | 5  | 17  | 23.60 | 1.52 |
| -1 | -5 | 17  | 21.13 | 1.52 |
| -2 | -5 | -17 | 1.27  | 0.79 |
| 2  | -5 | 17  | 1.29  | 0.48 |
| -2 | 5  | 17  | 0.62  | 0.49 |
| 2  | -5 | 17  | 1.17  | 0.54 |
| -2 | 5  | 17  | 0.69  | 0.47 |
| 2  | -5 | 17  | 0.41  | 0.36 |
| -2 | 5  | 17  | 0.74  | 0.55 |
| 2  | -5 | 17  | 1.33  | 0.70 |
| 2  | -5 | 17  | 0.18  | 0.69 |
| -2 | 5  | 17  | 0.58  | 0.50 |
| -2 | 5  | 17  | 0.69  | 0.54 |
| 2  | 5  | 17  | 0.38  | 0.64 |
| -2 | -5 | 17  | 0.88  | 0.65 |
| 2  | 5  | 17  | 0.42  | 0.62 |
| -2 | -5 | 17  | 1.09  | 0.39 |
| -2 | 5  | -17 | 0.41  | 0.77 |
| -2 | 5  | -17 | 0.74  | 0.93 |
| -2 | -5 | 17  | 1.49  | 0.40 |
| 2  | 5  | 17  | 0.65  | 0.35 |
| 3  | -5 | 17  | 1.55  | 0.51 |
| -3 | 5  | 17  | 2.90  | 0.61 |
| 3  | -5 | 17  | 1.88  | 0.65 |
| -3 | 5  | 17  | 1.56  | 0.46 |
| 3  | -5 | 17  | 2.30  | 0.57 |
| -3 | 5  | 17  | 1.86  | 0.46 |
| 3  | -5 | 17  | 1.87  | 0.68 |
| -3 | -5 | -17 | 1.94  | 0.55 |
| -3 | -5 | 17  | 1.64  | 0.38 |
| -3 | -5 | 17  | 2.07  | 0.34 |
| 3  | 5  | 17  | 1.33  | 0.48 |
| -3 | -5 | 17  | 2.13  | 0.54 |
| 3  | 5  | 17  | 0.94  | 0.59 |
| -3 | 5  | -17 | 2.26  | 0.88 |
| -3 | -5 | 17  | 5.28  | 1.40 |
| -3 | 5  | -17 | 2.23  | 0.72 |
| -4 | 5  | 17  | 2.61  | 0.56 |
| -4 | 5  | 17  | 4.04  | 0.67 |
| 4  | -5 | 17  | 3.49  | 0.75 |
| -4 | 5  | 17  | 4.05  | 0.53 |

## CIF S3

|    |    |     |       |      |
|----|----|-----|-------|------|
| -4 | -5 | 17  | 4.20  | 0.44 |
| -4 | 5  | -17 | 4.43  | 0.99 |
| -4 | 5  | -17 | 4.83  | 0.87 |
| -4 | -5 | 17  | 4.26  | 0.42 |
| -5 | -5 | -17 | 1.09  | 0.29 |
| -5 | 5  | 17  | 1.99  | 0.48 |
| 5  | -5 | 17  | 2.47  | 0.44 |
| 5  | -5 | 17  | 0.65  | 0.18 |
| -5 | 5  | 17  | 2.47  | 0.42 |
| -5 | 5  | -17 | 1.71  | 0.58 |
| -5 | 5  | -17 | 1.52  | 0.60 |
| 0  | 6  | 17  | 12.16 | 1.17 |
| 0  | 6  | 17  | 11.74 | 1.02 |
| 0  | -6 | 17  | 12.18 | 1.00 |
| 0  | 6  | 17  | 13.87 | 1.11 |
| 0  | -6 | 17  | 12.79 | 0.92 |
| 0  | -6 | 17  | 11.84 | 1.07 |
| 0  | -6 | 17  | 13.70 | 1.02 |
| 0  | -6 | 17  | 11.83 | 0.93 |
| 1  | -6 | 17  | 4.44  | 0.76 |
| 1  | -6 | 17  | 4.27  | 1.14 |
| -1 | -6 | -17 | 4.92  | 1.22 |
| -1 | 6  | 17  | 4.95  | 0.87 |
| 1  | -6 | 17  | 6.11  | 0.85 |
| -1 | 6  | 17  | 4.49  | 0.92 |
| 1  | -6 | 17  | 5.00  | 0.86 |
| 1  | -6 | 17  | 4.47  | 0.89 |
| -1 | 6  | 17  | 5.16  | 0.80 |
| -1 | -6 | 17  | 6.97  | 0.82 |
| 1  | 6  | 17  | 4.65  | 0.81 |
| -1 | -6 | 17  | 4.86  | 0.66 |
| 1  | 6  | 17  | 5.25  | 0.41 |
| -1 | -6 | 17  | 4.20  | 0.86 |
| 1  | 6  | 17  | 6.38  | 0.96 |
| 1  | 6  | 17  | 4.70  | 0.89 |
| 2  | -6 | 17  | 4.10  | 0.87 |
| 2  | -6 | 17  | 4.14  | 0.65 |
| -2 | 6  | 17  | 2.71  | 0.76 |
| 2  | -6 | 17  | 4.55  | 0.88 |
| 2  | -6 | 17  | 1.56  | 0.53 |
| -2 | 6  | 17  | 3.18  | 0.76 |

## CIF S3

|    |    |     |       |      |
|----|----|-----|-------|------|
| -2 | 6  | 17  | 3.07  | 0.78 |
| 2  | -6 | 17  | 3.03  | 1.03 |
| -2 | 6  | 17  | 3.04  | 0.67 |
| -2 | 6  | 17  | 2.89  | 0.78 |
| -2 | -6 | -17 | 2.81  | 0.69 |
| 2  | 6  | 17  | 4.20  | 0.88 |
| -2 | 6  | -17 | 3.30  | 0.76 |
| -2 | 6  | -17 | 5.30  | 1.33 |
| -2 | -6 | 17  | 3.55  | 0.60 |
| 2  | 6  | 17  | 3.53  | 0.53 |
| -2 | -6 | 17  | 2.74  | 0.69 |
| -2 | -6 | 17  | 2.61  | 0.63 |
| 3  | -6 | 17  | 1.00  | 0.70 |
| -3 | 6  | 17  | 0.60  | 0.43 |
| 3  | -6 | 17  | 3.19  | 0.85 |
| -3 | 6  | 17  | 1.45  | 0.42 |
| 3  | -6 | 17  | 1.58  | 0.48 |
| 3  | -6 | 17  | 0.48  | 0.47 |
| -3 | 6  | 17  | 1.24  | 0.44 |
| -3 | 6  | -17 | 1.87  | 0.66 |
| -3 | -6 | 17  | 2.50  | 0.50 |
| 3  | 6  | 17  | 2.27  | 0.49 |
| -3 | 6  | -17 | 1.95  | 0.84 |
| -3 | -6 | 17  | 2.29  | 0.47 |
| -4 | -6 | -17 | 0.76  | 0.42 |
| -4 | 6  | 17  | 0.06  | 0.28 |
| 4  | -6 | 17  | -0.36 | 0.72 |
| 4  | -6 | 17  | 0.08  | 0.70 |
| -4 | 6  | 17  | 0.56  | 0.29 |
| -4 | 6  | 17  | 0.33  | 0.37 |
| 4  | -6 | 17  | -0.12 | 0.43 |
| -4 | -6 | 17  | 0.53  | 0.22 |
| -4 | -6 | 17  | 0.66  | 0.19 |
| -4 | 6  | -17 | 0.58  | 0.69 |
| -4 | 6  | -17 | -0.65 | 0.60 |
| -4 | -6 | 17  | 0.69  | 0.17 |
| -5 | 6  | 17  | 0.25  | 0.31 |
| 5  | -6 | 17  | 0.43  | 0.35 |
| -5 | 6  | 17  | -0.11 | 0.25 |
| -5 | 6  | -17 | -0.15 | 0.50 |
| -5 | 6  | -17 | 0.50  | 0.57 |

## CIF S3

|    |    |     |      |      |
|----|----|-----|------|------|
| 0  | -7 | 17  | 1.62 | 0.59 |
| 0  | -7 | 17  | 2.08 | 0.49 |
| 0  | 7  | 17  | 2.25 | 0.61 |
| 0  | 7  | 17  | 1.72 | 0.62 |
| 0  | -7 | 17  | 2.30 | 0.48 |
| 0  | 7  | 17  | 2.46 | 0.70 |
| -1 | 7  | 17  | 1.19 | 0.52 |
| -1 | 7  | 17  | 1.54 | 0.52 |
| 1  | -7 | 17  | 1.55 | 0.54 |
| -1 | 7  | 17  | 0.18 | 0.60 |
| -1 | -7 | -17 | 1.64 | 0.70 |
| 1  | -7 | 17  | 0.82 | 0.36 |
| 1  | -7 | 17  | 0.76 | 0.43 |
| 1  | -7 | 17  | 0.76 | 0.61 |
| 1  | -7 | 17  | 3.45 | 0.76 |
| 1  | 7  | 17  | 1.03 | 0.55 |
| -1 | -7 | 17  | 2.82 | 0.69 |
| 1  | 7  | 17  | 1.30 | 0.67 |
| -1 | -7 | 17  | 0.77 | 0.77 |
| 1  | 7  | 17  | 1.08 | 0.61 |
| -2 | -7 | -17 | 2.69 | 0.68 |
| -2 | 7  | 17  | 2.72 | 0.73 |
| -2 | 7  | 17  | 2.39 | 0.50 |
| -2 | 7  | 17  | 2.72 | 0.71 |
| -2 | 7  | 17  | 2.71 | 0.75 |
| 2  | -7 | 17  | 2.67 | 0.57 |
| 2  | -7 | 17  | 1.69 | 0.49 |
| 2  | -7 | 17  | 2.45 | 0.42 |
| 2  | -7 | 17  | 2.15 | 0.92 |
| -2 | 7  | -17 | 5.04 | 1.17 |
| 2  | 7  | 17  | 3.18 | 0.85 |
| -2 | -7 | 17  | 2.96 | 0.59 |
| -2 | -7 | 17  | 3.33 | 0.53 |
| -2 | 7  | -17 | 3.89 | 1.02 |
| 2  | 7  | 17  | 2.68 | 0.44 |
| 3  | -7 | 17  | 2.00 | 0.53 |
| 3  | -7 | 17  | 2.04 | 0.52 |
| -3 | 7  | 17  | 2.71 | 0.64 |
| 3  | -7 | 17  | 1.01 | 0.45 |
| -3 | 7  | 17  | 1.13 | 0.38 |
| -3 | 7  | 17  | 1.79 | 0.44 |

## CIF S3

|    |    |     |       |      |
|----|----|-----|-------|------|
| -3 | -7 | 17  | 2.09  | 0.44 |
| -3 | 7  | -17 | 2.11  | 0.62 |
| -3 | 7  | -17 | 1.49  | 0.68 |
| 3  | 7  | 17  | 1.94  | 0.43 |
| 0  | -8 | 17  | 0.08  | 0.34 |
| 0  | 8  | 17  | -0.07 | 0.57 |
| 0  | 8  | 17  | 0.04  | 0.50 |
| 0  | -8 | 17  | 0.24  | 0.40 |
| 0  | -8 | 17  | 0.07  | 0.37 |
| 0  | -8 | -17 | 0.22  | 0.55 |
| -1 | 8  | 17  | 0.21  | 0.47 |
| -1 | -8 | -17 | 0.83  | 0.45 |
| 1  | -8 | 17  | 0.50  | 0.44 |
| 1  | -8 | 17  | 1.26  | 0.46 |
| -1 | 8  | 17  | 0.92  | 0.50 |
| 1  | -8 | 17  | 0.41  | 0.32 |
| 1  | -8 | 17  | 0.52  | 0.34 |
| 1  | 8  | 17  | 0.27  | 0.59 |
| -1 | -8 | 17  | 0.61  | 0.38 |
| -1 | -8 | 17  | 0.94  | 0.39 |
| 1  | 8  | 17  | 0.44  | 0.49 |
| -2 | 8  | 17  | 0.47  | 0.41 |
| 2  | -8 | 17  | 0.78  | 0.46 |
| -2 | 8  | 17  | 0.16  | 0.45 |
| -2 | 8  | 17  | 0.06  | 0.41 |
| 2  | -8 | 17  | 0.17  | 0.35 |
| 2  | -8 | 17  | -0.21 | 0.24 |
| -2 | 8  | 17  | 0.06  | 0.40 |
| 2  | 8  | 17  | 0.24  | 0.52 |
| -2 | 8  | -17 | 0.26  | 0.68 |
| -2 | 8  | -17 | 0.13  | 0.58 |
| -2 | -8 | 17  | 0.36  | 0.30 |
| -2 | -8 | 17  | -0.12 | 0.29 |
| -2 | -8 | 17  | 0.10  | 0.22 |
| -3 | 8  | 17  | 1.92  | 0.47 |
| 0  | -9 | -17 | 2.02  | 0.62 |
| 0  | 9  | 17  | 2.95  | 0.69 |
| 0  | -9 | 17  | 2.10  | 0.86 |
| 0  | -9 | 17  | 4.06  | 0.59 |
| 0  | 9  | 17  | 2.62  | 0.64 |
| -1 | 9  | 17  | -0.34 | 0.38 |



## CIF S3

|    |    |     |       |      |
|----|----|-----|-------|------|
| 1  | -9 | 17  | 0.16  | 0.35 |
| -1 | 9  | 17  | 0.43  | 0.46 |
| 1  | -9 | 17  | 0.12  | 0.24 |
| 1  | -9 | 17  | 0.45  | 0.32 |
| -1 | -9 | 17  | 0.47  | 0.32 |
| -1 | -9 | 17  | 0.28  | 0.30 |
| 1  | -9 | -17 | 0.37  | 0.44 |
| 1  | 9  | 17  | 0.65  | 0.46 |
| -1 | -9 | 17  | 0.06  | 0.38 |
| -2 | 9  | 17  | 0.27  | 0.33 |
| 2  | -9 | 17  | 0.12  | 0.37 |
| 0  | 0  | 18  | 7.52  | 0.84 |
| 0  | 0  | 18  | 7.52  | 0.83 |
| 0  | 0  | 18  | 8.56  | 0.91 |
| 1  | 0  | 18  | 1.24  | 0.56 |
| 1  | 0  | 18  | 0.76  | 0.42 |
| -1 | 0  | 18  | 1.61  | 0.43 |
| -1 | 0  | 18  | 0.78  | 0.44 |
| -1 | 0  | 18  | 1.22  | 0.47 |
| -1 | 0  | 18  | 1.75  | 0.48 |
| 1  | 0  | 18  | 1.19  | 0.55 |
| 1  | 0  | 18  | 0.37  | 0.51 |
| 2  | 0  | 18  | -0.29 | 0.31 |
| -2 | 0  | 18  | -0.07 | 0.41 |
| 2  | 0  | 18  | 0.18  | 0.53 |
| 2  | 0  | 18  | 0.09  | 0.62 |
| 2  | 0  | 18  | -0.11 | 0.51 |
| -2 | 0  | 18  | -0.13 | 0.46 |
| -2 | 0  | 18  | -0.34 | 0.48 |
| -3 | 0  | 18  | 2.98  | 0.50 |
| -3 | 0  | 18  | 1.48  | 0.77 |
| 3  | 0  | 18  | 3.05  | 0.50 |
| -3 | 0  | 18  | 2.95  | 0.65 |
| -3 | 0  | 18  | 3.51  | 0.54 |
| 3  | 0  | 18  | 3.64  | 0.86 |
| 3  | 0  | 18  | 2.95  | 0.80 |
| -4 | 0  | 18  | 6.11  | 0.59 |
| -4 | 0  | -18 | 5.77  | 1.23 |
| -4 | 0  | 18  | 5.99  | 0.54 |
| 4  | 0  | 18  | 5.63  | 0.54 |
| 4  | 0  | 18  | 6.96  | 0.88 |

## CIF S3

|    |    |     |       |      |
|----|----|-----|-------|------|
| -5 | 0  | 18  | 2.34  | 0.28 |
| -5 | 0  | 18  | 1.95  | 0.24 |
| -5 | 0  | 18  | 2.37  | 0.28 |
| -5 | 0  | -18 | 1.27  | 0.71 |
| 5  | 0  | 18  | 2.22  | 0.41 |
| 0  | 1  | 18  | 3.04  | 0.53 |
| 0  | 1  | 18  | 1.48  | 0.51 |
| 0  | -1 | 18  | 2.25  | 0.48 |
| 0  | 1  | 18  | 1.80  | 0.51 |
| 0  | -1 | 18  | 0.83  | 0.47 |
| 0  | -1 | 18  | 2.43  | 0.54 |
| 0  | 1  | 18  | 1.71  | 0.50 |
| 0  | -1 | 18  | 2.64  | 0.74 |
| 1  | -1 | 18  | 21.43 | 1.35 |
| -1 | 1  | 18  | 20.50 | 1.31 |
| 1  | -1 | 18  | 20.64 | 1.74 |
| -1 | 1  | 18  | 20.11 | 1.26 |
| -1 | 1  | 18  | 19.14 | 1.22 |
| 1  | -1 | 18  | 18.67 | 1.40 |
| 1  | -1 | 18  | 20.76 | 1.33 |
| -1 | 1  | 18  | 19.41 | 1.28 |
| -1 | -1 | 18  | 18.98 | 1.21 |
| 1  | 1  | 18  | 19.76 | 1.31 |
| 1  | 1  | 18  | 22.37 | 1.72 |
| 1  | 1  | 18  | 20.10 | 1.35 |
| -1 | -1 | 18  | 18.77 | 1.26 |
| 1  | 1  | 18  | 20.27 | 1.33 |
| -1 | -1 | 18  | 18.54 | 1.23 |
| -2 | 1  | 18  | 1.49  | 0.43 |
| 2  | -1 | 18  | 0.36  | 0.34 |
| 2  | -1 | 18  | 1.06  | 0.55 |
| -2 | 1  | 18  | 0.39  | 0.43 |
| -2 | 1  | 18  | 0.74  | 0.53 |
| 2  | -1 | 18  | 0.78  | 0.63 |
| 2  | -1 | 18  | 0.06  | 0.50 |
| 2  | 1  | 18  | 0.42  | 0.52 |
| -2 | -1 | 18  | 0.91  | 0.41 |
| 2  | 1  | 18  | 0.65  | 0.53 |
| 2  | 1  | 18  | 0.05  | 0.51 |
| 2  | 1  | 18  | -0.06 | 0.33 |
| 2  | 1  | 18  | 0.82  | 0.23 |

## CIF S3

|    |    |     |      |      |
|----|----|-----|------|------|
| 3  | -1 | 18  | 4.91 | 0.49 |
| -3 | 1  | 18  | 5.38 | 0.61 |
| 3  | -1 | 18  | 6.50 | 0.84 |
| -3 | 1  | 18  | 5.02 | 0.57 |
| 3  | -1 | 18  | 4.86 | 0.81 |
| 3  | -1 | 18  | 5.43 | 0.98 |
| -3 | 1  | 18  | 4.62 | 0.70 |
| 3  | 1  | 18  | 5.19 | 0.87 |
| -3 | 1  | -18 | 2.78 | 0.84 |
| -3 | -1 | 18  | 3.70 | 0.91 |
| -3 | -1 | 18  | 4.96 | 0.51 |
| -3 | -1 | 18  | 4.71 | 0.61 |
| 3  | 1  | 18  | 4.75 | 0.54 |
| -3 | -1 | 18  | 5.26 | 0.63 |
| -3 | -1 | 18  | 6.10 | 0.58 |
| 3  | 1  | 18  | 3.79 | 0.80 |
| -4 | -1 | -18 | 1.25 | 1.26 |
| -4 | 1  | 18  | 1.69 | 0.44 |
| -4 | 1  | 18  | 1.90 | 0.29 |
| 4  | -1 | 18  | 2.06 | 0.40 |
| -4 | 1  | 18  | 1.66 | 0.35 |
| 4  | -1 | 18  | 2.56 | 0.56 |
| 4  | 1  | 18  | 1.79 | 0.49 |
| -4 | 1  | -18 | 1.22 | 0.83 |
| -4 | -1 | 18  | 2.18 | 0.41 |
| 4  | 1  | 18  | 2.15 | 0.53 |
| -5 | 1  | 18  | 3.58 | 0.50 |
| -5 | 1  | 18  | 3.75 | 0.35 |
| 5  | -1 | 18  | 3.40 | 0.40 |
| -5 | -1 | -18 | 3.51 | 0.98 |
| -5 | -1 | -18 | 3.76 | 0.99 |
| -5 | 1  | 18  | 3.43 | 0.34 |
| 5  | 1  | 18  | 3.59 | 0.48 |
| -5 | 1  | -18 | 3.46 | 1.04 |
| -5 | -1 | 18  | 3.92 | 0.25 |
| -5 | -1 | 18  | 3.80 | 0.25 |
| 0  | 2  | 18  | 4.15 | 0.73 |
| 0  | -2 | 18  | 4.06 | 0.75 |
| 0  | 2  | 18  | 3.47 | 0.82 |
| 0  | 2  | 18  | 4.34 | 0.84 |
| 0  | -2 | 18  | 3.26 | 0.80 |

## CIF S3

|    |    |     |      |      |
|----|----|-----|------|------|
| 0  | -2 | 18  | 4.49 | 0.74 |
| 0  | 2  | 18  | 5.85 | 1.34 |
| 0  | -2 | 18  | 3.16 | 0.84 |
| 0  | 2  | 18  | 2.91 | 0.82 |
| -1 | 2  | 18  | 2.63 | 0.64 |
| 1  | -2 | 18  | 2.59 | 0.54 |
| -1 | 2  | 18  | 2.38 | 0.70 |
| 1  | -2 | 18  | 2.42 | 1.21 |
| -1 | 2  | 18  | 2.98 | 0.76 |
| -1 | 2  | 18  | 2.47 | 0.54 |
| -1 | 2  | 18  | 2.39 | 0.61 |
| 1  | -2 | 18  | 4.20 | 0.81 |
| 1  | -2 | 18  | 2.85 | 0.65 |
| 1  | -2 | 18  | 3.38 | 0.81 |
| 1  | 2  | 18  | 2.75 | 0.59 |
| -1 | -2 | 18  | 2.73 | 0.59 |
| 1  | 2  | 18  | 3.20 | 0.83 |
| -1 | -2 | 18  | 1.88 | 0.45 |
| -1 | -2 | 18  | 2.38 | 0.66 |
| 1  | 2  | 18  | 2.53 | 0.56 |
| 2  | -2 | 18  | 5.57 | 0.84 |
| -2 | 2  | 18  | 6.81 | 0.88 |
| 2  | -2 | 18  | 6.35 | 0.86 |
| -2 | 2  | 18  | 6.31 | 1.07 |
| 2  | -2 | 18  | 5.18 | 0.96 |
| 2  | -2 | 18  | 5.46 | 1.09 |
| -2 | 2  | 18  | 5.68 | 0.76 |
| -2 | 2  | 18  | 7.25 | 0.85 |
| 2  | -2 | 18  | 5.10 | 0.75 |
| 2  | 2  | 18  | 6.47 | 0.85 |
| -2 | -2 | 18  | 5.58 | 0.95 |
| 2  | 2  | 18  | 5.61 | 0.87 |
| -2 | -2 | 18  | 4.84 | 0.71 |
| -2 | 2  | -18 | 5.56 | 1.38 |
| 2  | 2  | 18  | 5.02 | 0.88 |
| 2  | 2  | 18  | 6.53 | 0.53 |
| -2 | -2 | 18  | 6.07 | 0.69 |
| 3  | -2 | 18  | 1.84 | 0.55 |
| 3  | -2 | 18  | 1.89 | 0.55 |
| -3 | 2  | 18  | 1.43 | 0.41 |
| -3 | 2  | 18  | 1.25 | 0.35 |

## CIF S3

|    |    |     |       |      |
|----|----|-----|-------|------|
| -3 | 2  | 18  | 0.63  | 0.36 |
| 3  | -2 | 18  | 1.01  | 0.59 |
| 3  | -2 | 18  | 0.46  | 0.40 |
| -3 | -2 | 18  | 1.66  | 0.40 |
| 3  | 2  | 18  | 1.12  | 0.51 |
| -3 | -2 | 18  | 0.71  | 0.31 |
| -3 | 2  | -18 | 0.32  | 0.87 |
| -3 | -2 | 18  | 1.20  | 0.33 |
| -3 | -2 | 18  | -0.19 | 0.99 |
| 3  | 2  | 18  | 1.14  | 0.32 |
| 4  | -2 | 18  | 5.64  | 0.46 |
| -4 | 2  | 18  | 5.69  | 0.46 |
| -4 | 2  | 18  | 5.10  | 0.55 |
| 4  | -2 | 18  | 5.76  | 0.82 |
| -4 | 2  | 18  | 5.27  | 0.61 |
| -4 | -2 | 18  | 5.95  | 0.49 |
| 4  | 2  | 18  | 4.37  | 0.78 |
| -4 | -2 | 18  | 6.17  | 0.47 |
| -4 | 2  | -18 | 4.85  | 1.12 |
| 4  | 2  | 18  | 4.20  | 0.56 |
| -5 | 2  | 18  | -0.18 | 0.18 |
| 5  | -2 | 18  | 0.47  | 0.24 |
| -5 | -2 | -18 | 0.39  | 0.90 |
| -5 | -2 | -18 | -0.09 | 0.37 |
| -5 | 2  | 18  | 0.18  | 0.19 |
| 5  | -2 | 18  | 0.18  | 0.58 |
| -5 | 2  | -18 | -0.42 | 0.67 |
| 5  | 2  | 18  | -0.02 | 0.28 |
| 0  | -3 | 18  | 0.13  | 0.44 |
| 0  | 3  | 18  | 0.54  | 0.48 |
| 0  | 3  | 18  | -0.08 | 0.53 |
| 0  | 3  | 18  | 0.07  | 0.47 |
| 0  | -3 | 18  | 0.15  | 0.52 |
| 0  | -3 | 18  | 0.79  | 0.45 |
| 0  | -3 | 18  | -0.08 | 0.41 |
| 0  | 3  | 18  | 0.49  | 0.48 |
| 0  | 3  | 18  | -0.15 | 0.49 |
| -1 | 3  | 18  | 3.84  | 0.82 |
| 1  | -3 | 18  | 3.79  | 0.75 |
| 1  | -3 | 18  | 4.48  | 0.77 |
| -1 | 3  | 18  | 2.99  | 0.81 |

## CIF S3

|    |    |     |       |      |
|----|----|-----|-------|------|
| 1  | -3 | 18  | 3.63  | 1.18 |
| 1  | -3 | 18  | 3.40  | 0.95 |
| 1  | -3 | 18  | 3.25  | 0.74 |
| -1 | 3  | 18  | 3.25  | 0.73 |
| -1 | 3  | 18  | 4.07  | 0.90 |
| -1 | 3  | 18  | 4.04  | 0.70 |
| -1 | -3 | 18  | 3.96  | 0.66 |
| 1  | 3  | 18  | 3.73  | 0.75 |
| 1  | 3  | 18  | 3.37  | 0.86 |
| -1 | -3 | 18  | 3.56  | 0.77 |
| -1 | 3  | -18 | 4.57  | 1.37 |
| 1  | 3  | 18  | 4.35  | 0.92 |
| -1 | -3 | 18  | 1.68  | 0.64 |
| 2  | -3 | 18  | 0.71  | 0.43 |
| 2  | -3 | 18  | 0.42  | 0.52 |
| 2  | -3 | 18  | 1.14  | 0.52 |
| -2 | 3  | 18  | 1.19  | 0.49 |
| -2 | 3  | 18  | 0.68  | 0.43 |
| -2 | 3  | 18  | 0.95  | 0.40 |
| -2 | 3  | 18  | 0.52  | 0.48 |
| 2  | -3 | 18  | 0.52  | 0.60 |
| 2  | -3 | 18  | 0.44  | 0.34 |
| -2 | -3 | 18  | 1.22  | 0.71 |
| 2  | 3  | 18  | 1.48  | 0.57 |
| 2  | 3  | 18  | 1.23  | 0.27 |
| -2 | 3  | -18 | 0.21  | 0.84 |
| -2 | -3 | 18  | 0.47  | 0.37 |
| 2  | 3  | 18  | -0.15 | 0.48 |
| -2 | -3 | 18  | 1.12  | 0.37 |
| 2  | 3  | 18  | 0.62  | 0.53 |
| -3 | 3  | 18  | 0.84  | 0.43 |
| 3  | -3 | 18  | 0.53  | 0.50 |
| 3  | -3 | 18  | 0.21  | 0.46 |
| 3  | -3 | 18  | -0.05 | 0.44 |
| -3 | -3 | -18 | -0.78 | 0.66 |
| 3  | -3 | 18  | 0.53  | 0.56 |
| 3  | -3 | 18  | 0.00  | 0.31 |
| -3 | 3  | 18  | 0.20  | 0.34 |
| -3 | 3  | 18  | -0.20 | 0.36 |
| -3 | -3 | 18  | 0.22  | 0.22 |
| -3 | -3 | 18  | -0.38 | 0.29 |

## CIF S3

|    |    |     |       |      |
|----|----|-----|-------|------|
| -3 | 3  | -18 | 0.21  | 0.83 |
| 3  | 3  | 18  | 0.25  | 0.30 |
| -3 | -3 | 18  | -0.09 | 0.29 |
| 3  | 3  | 18  | 0.41  | 0.53 |
| 4  | -3 | 18  | 13.72 | 1.13 |
| -4 | 3  | 18  | 15.97 | 0.88 |
| -4 | 3  | 18  | 15.61 | 0.96 |
| -4 | 3  | 18  | 16.01 | 0.95 |
| -4 | -3 | 18  | 16.51 | 0.86 |
| -4 | 3  | -18 | 15.63 | 1.38 |
| 4  | 3  | 18  | 15.36 | 0.94 |
| -4 | -3 | 18  | 15.77 | 0.88 |
| 5  | -3 | 18  | 2.68  | 0.35 |
| 5  | -3 | 18  | 2.65  | 0.63 |
| -5 | -3 | -18 | 3.10  | 0.52 |
| -5 | 3  | 18  | 3.08  | 0.34 |
| -5 | 3  | 18  | 2.39  | 0.33 |
| -5 | 3  | -18 | 2.06  | 0.67 |
| 5  | 3  | 18  | 2.29  | 0.44 |
| 0  | 4  | 18  | 1.79  | 0.55 |
| 0  | -4 | 18  | 2.72  | 0.65 |
| 0  | -4 | 18  | 2.77  | 0.55 |
| 0  | 4  | 18  | 3.13  | 0.72 |
| 0  | 4  | 18  | 2.22  | 0.56 |
| 0  | 4  | 18  | 2.54  | 0.57 |
| 0  | -4 | 18  | 3.19  | 0.67 |
| 0  | -4 | 18  | 2.58  | 0.48 |
| -1 | 4  | 18  | 4.10  | 0.79 |
| 1  | -4 | 18  | 3.68  | 0.89 |
| 1  | -4 | 18  | 4.61  | 0.75 |
| 1  | -4 | 18  | 3.81  | 1.18 |
| -1 | 4  | 18  | 3.43  | 0.80 |
| -1 | 4  | 18  | 5.74  | 0.93 |
| 1  | -4 | 18  | 4.10  | 0.70 |
| -1 | 4  | 18  | 3.63  | 0.66 |
| 1  | -4 | 18  | 3.55  | 0.73 |
| -1 | 4  | 18  | 3.42  | 0.78 |
| -1 | -4 | 18  | 3.73  | 0.71 |
| -1 | -4 | 18  | 4.02  | 0.97 |
| 1  | 4  | 18  | 4.17  | 0.86 |
| 1  | 4  | 18  | 2.38  | 0.59 |

## CIF S3

|    |    |     |       |      |
|----|----|-----|-------|------|
| 1  | 4  | 18  | 3.56  | 0.77 |
| -1 | 4  | -18 | 4.11  | 0.90 |
| -1 | -4 | 18  | 4.55  | 0.62 |
| 2  | -4 | 18  | 1.88  | 0.50 |
| -2 | 4  | 18  | 2.65  | 0.65 |
| 2  | -4 | 18  | 3.22  | 0.62 |
| 2  | -4 | 18  | 1.48  | 0.36 |
| -2 | 4  | 18  | 2.91  | 0.57 |
| -2 | 4  | 18  | 3.46  | 0.76 |
| -2 | 4  | 18  | 1.85  | 0.49 |
| 2  | -4 | 18  | 2.00  | 0.53 |
| 2  | -4 | 18  | 2.40  | 0.57 |
| -2 | -4 | -18 | 2.62  | 0.85 |
| -2 | -4 | 18  | 2.16  | 0.57 |
| 2  | 4  | 18  | 2.10  | 0.58 |
| -2 | -4 | 18  | 1.25  | 0.37 |
| 2  | 4  | 18  | 2.22  | 0.54 |
| 2  | 4  | 18  | 2.40  | 0.62 |
| -2 | 4  | -18 | 4.42  | 0.93 |
| 2  | 4  | 18  | 2.48  | 0.40 |
| -3 | 4  | 18  | 1.46  | 0.43 |
| -3 | 4  | 18  | 2.23  | 0.59 |
| 3  | -4 | 18  | 2.71  | 0.62 |
| 3  | -4 | 18  | 1.08  | 0.47 |
| -3 | -4 | -18 | 1.91  | 0.53 |
| 3  | -4 | 18  | 1.11  | 0.71 |
| -3 | 4  | 18  | 3.31  | 0.93 |
| 3  | -4 | 18  | 0.72  | 0.41 |
| -3 | 4  | -18 | 2.70  | 0.85 |
| -3 | -4 | 18  | 2.14  | 0.34 |
| 3  | 4  | 18  | 0.72  | 0.51 |
| -3 | -4 | 18  | 2.27  | 0.25 |
| -3 | -4 | 18  | 1.66  | 0.46 |
| 3  | 4  | 18  | 2.26  | 0.48 |
| -4 | 4  | 18  | 0.22  | 0.26 |
| -4 | 4  | 18  | 0.41  | 0.33 |
| 4  | -4 | 18  | 0.43  | 0.43 |
| -4 | 4  | -18 | -0.13 | 0.68 |
| -4 | -4 | 18  | 0.49  | 0.23 |
| -4 | -4 | 18  | 0.22  | 0.23 |
| -4 | -4 | 18  | 0.48  | 0.17 |



## CIF S3

|    |    |     |      |      |
|----|----|-----|------|------|
| 4  | 4  | 18  | 0.35 | 0.30 |
| 5  | -4 | 18  | 5.89 | 0.67 |
| -5 | 4  | 18  | 6.35 | 0.45 |
| -5 | -4 | -18 | 6.75 | 0.57 |
| -5 | 4  | -18 | 9.75 | 1.18 |
| 5  | 4  | 18  | 6.27 | 0.53 |
| -5 | 4  | -18 | 6.83 | 0.89 |
| 0  | 5  | 18  | 2.31 | 0.60 |
| 0  | -5 | 18  | 2.69 | 0.51 |
| 0  | -5 | 18  | 2.61 | 0.58 |
| 0  | -5 | 18  | 2.81 | 0.80 |
| 0  | 5  | 18  | 2.39 | 0.58 |
| 0  | 5  | 18  | 1.07 | 0.49 |
| 0  | -5 | 18  | 2.00 | 0.43 |
| 1  | -5 | 18  | 1.46 | 0.42 |
| -1 | -5 | -18 | 1.15 | 0.89 |
| -1 | 5  | 18  | 0.98 | 0.48 |
| 1  | -5 | 18  | 0.55 | 0.35 |
| -1 | 5  | 18  | 1.89 | 0.51 |
| -1 | 5  | 18  | 1.68 | 0.53 |
| -1 | 5  | 18  | 1.01 | 0.52 |
| -1 | 5  | 18  | 0.51 | 0.50 |
| 1  | -5 | 18  | 0.51 | 0.46 |
| 1  | -5 | 18  | 0.77 | 0.43 |
| 1  | -5 | 18  | 1.48 | 0.53 |
| -1 | -5 | 18  | 1.34 | 0.40 |
| 1  | 5  | 18  | 0.48 | 0.53 |
| -1 | 5  | -18 | 2.60 | 0.83 |
| 1  | 5  | 18  | 1.20 | 0.51 |
| 1  | 5  | 18  | 0.82 | 0.56 |
| 2  | -5 | 18  | 2.64 | 0.67 |
| 2  | -5 | 18  | 0.74 | 0.57 |
| -2 | 5  | 18  | 2.78 | 0.82 |
| -2 | 5  | 18  | 3.06 | 0.72 |
| -2 | 5  | 18  | 2.53 | 0.49 |
| -2 | 5  | 18  | 3.51 | 0.65 |
| 2  | -5 | 18  | 2.58 | 0.45 |
| -2 | -5 | -18 | 4.21 | 0.89 |
| -2 | 5  | 18  | 2.52 | 0.70 |
| 2  | -5 | 18  | 2.90 | 0.79 |
| -2 | 5  | -18 | 2.71 | 0.78 |

## CIF S3

|    |    |     |       |      |
|----|----|-----|-------|------|
| -2 | -5 | 18  | 2.29  | 0.35 |
| 2  | 5  | 18  | 3.02  | 0.41 |
| -2 | -5 | 18  | 1.73  | 0.37 |
| 2  | 5  | 18  | 1.85  | 0.55 |
| 3  | -5 | 18  | 1.20  | 0.37 |
| 3  | -5 | 18  | 2.27  | 0.55 |
| -3 | 5  | 18  | 0.91  | 0.40 |
| 3  | -5 | 18  | 2.81  | 0.50 |
| -3 | 5  | 18  | 1.24  | 0.37 |
| 3  | 5  | 18  | 0.49  | 0.46 |
| -3 | 5  | -18 | 1.53  | 0.73 |
| -3 | 5  | -18 | 1.78  | 0.65 |
| -3 | -5 | 18  | 1.80  | 0.31 |
| -3 | -5 | 18  | 2.13  | 0.47 |
| 3  | 5  | 18  | 1.86  | 0.42 |
| -4 | -5 | -18 | 9.06  | 0.77 |
| 4  | -5 | 18  | 6.83  | 0.78 |
| -4 | 5  | 18  | 7.67  | 0.54 |
| 4  | -5 | 18  | 7.27  | 0.72 |
| -4 | 5  | 18  | 7.55  | 0.66 |
| -4 | -5 | 18  | 7.96  | 0.46 |
| 4  | 5  | 18  | 7.79  | 0.56 |
| -4 | 5  | -18 | 7.32  | 1.07 |
| -4 | 5  | -18 | 7.01  | 0.85 |
| -4 | -5 | 18  | 7.75  | 0.45 |
| 0  | 6  | 18  | 16.49 | 1.19 |
| 0  | 6  | 18  | 18.39 | 1.17 |
| 0  | -6 | 18  | 15.83 | 1.09 |
| 0  | -6 | 18  | 16.30 | 1.06 |
| 1  | -6 | 18  | 3.24  | 1.05 |
| 1  | -6 | 18  | 3.97  | 0.74 |
| -1 | 6  | 18  | 2.40  | 0.51 |
| 1  | -6 | 18  | 2.80  | 0.68 |
| -1 | -6 | -18 | 5.04  | 1.04 |
| -1 | 6  | 18  | 2.83  | 0.75 |
| -1 | 6  | 18  | 3.06  | 0.76 |
| 1  | -6 | 18  | 2.66  | 0.60 |
| -1 | -6 | 18  | 3.72  | 0.64 |
| 1  | 6  | 18  | 3.02  | 0.79 |
| -1 | 6  | -18 | 4.13  | 1.11 |
| 1  | 6  | 18  | 4.37  | 0.85 |

## CIF S3

|    |    |     |      |      |
|----|----|-----|------|------|
| -1 | -6 | 18  | 3.65 | 0.64 |
| -2 | 6  | 18  | 0.49 | 0.40 |
| -2 | 6  | 18  | 0.67 | 0.42 |
| 2  | -6 | 18  | 0.28 | 0.50 |
| 2  | -6 | 18  | 0.42 | 0.27 |
| -2 | 6  | 18  | 0.40 | 0.79 |
| 2  | -6 | 18  | 1.05 | 0.40 |
| -2 | 6  | 18  | 0.81 | 0.44 |
| -2 | -6 | -18 | 0.65 | 0.46 |
| 2  | 6  | 18  | 0.17 | 0.49 |
| -2 | -6 | 18  | 0.95 | 0.32 |
| -2 | -6 | 18  | 0.72 | 0.24 |
| -2 | -6 | 18  | 0.72 | 0.33 |
| -2 | 6  | -18 | 1.47 | 0.72 |
| -2 | 6  | -18 | 1.02 | 0.61 |
| 3  | -6 | 18  | 2.49 | 0.64 |
| 3  | -6 | 18  | 2.63 | 0.52 |
| 3  | -6 | 18  | 2.36 | 0.58 |
| -3 | 6  | 18  | 2.47 | 0.53 |
| -3 | 6  | 18  | 2.37 | 0.58 |
| 3  | 6  | 18  | 1.95 | 0.34 |
| -3 | -6 | 18  | 2.59 | 0.39 |
| -3 | 6  | -18 | 1.79 | 0.64 |
| 3  | 6  | 18  | 0.61 | 0.45 |
| -3 | 6  | -18 | 2.14 | 0.56 |
| 4  | -6 | 18  | 3.71 | 0.83 |
| 4  | -6 | 18  | 4.21 | 0.54 |
| -4 | 6  | 18  | 3.25 | 0.44 |
| -4 | 6  | 18  | 3.97 | 0.38 |
| -4 | -6 | -18 | 3.32 | 0.51 |
| 4  | 6  | 18  | 3.98 | 0.37 |
| -4 | 6  | -18 | 3.48 | 0.76 |
| -4 | 6  | -18 | 3.91 | 0.79 |
| 0  | 7  | 18  | 2.98 | 0.76 |
| 0  | -7 | 18  | 4.89 | 0.98 |
| 0  | -7 | -18 | 4.70 | 0.96 |
| 0  | -7 | 18  | 3.36 | 0.62 |
| 0  | 7  | 18  | 4.45 | 0.76 |
| 0  | -7 | 18  | 3.24 | 0.56 |
| 1  | -7 | 18  | 2.70 | 0.62 |
| -1 | 7  | 18  | 1.35 | 0.44 |

## CIF S3

|    |    |     |      |      |
|----|----|-----|------|------|
| 1  | -7 | 18  | 1.78 | 0.53 |
| 1  | -7 | 18  | 2.44 | 0.60 |
| -1 | 7  | 18  | 1.13 | 0.46 |
| -1 | -7 | -18 | 2.22 | 0.49 |
| 1  | -7 | 18  | 2.46 | 0.87 |
| -1 | 7  | 18  | 0.93 | 0.45 |
| -1 | 7  | -18 | 4.98 | 0.99 |
| -1 | 7  | -18 | 1.82 | 0.54 |
| 1  | 7  | 18  | 1.67 | 0.52 |
| -1 | -7 | 18  | 2.75 | 0.57 |
| 1  | 7  | 18  | 2.78 | 0.77 |
| -1 | -7 | 18  | 2.08 | 0.53 |
| -2 | 7  | 18  | 3.79 | 0.61 |
| 2  | -7 | 18  | 5.11 | 0.64 |
| -2 | 7  | 18  | 4.60 | 0.67 |
| -2 | 7  | 18  | 4.60 | 0.64 |
| 2  | -7 | 18  | 4.39 | 0.65 |
| 2  | -7 | 18  | 4.87 | 0.59 |
| 2  | 7  | 18  | 5.94 | 0.74 |
| -2 | -7 | 18  | 5.50 | 0.33 |
| -2 | 7  | -18 | 4.48 | 0.99 |
| -2 | 7  | -18 | 5.44 | 0.82 |
| -2 | -7 | 18  | 4.98 | 0.51 |
| -2 | -7 | 18  | 5.00 | 0.50 |
| 3  | -7 | 18  | 3.65 | 0.59 |
| 3  | -7 | 18  | 3.28 | 0.53 |
| -3 | 7  | 18  | 3.00 | 0.47 |
| -3 | 7  | 18  | 3.09 | 0.55 |
| -3 | -7 | 18  | 3.01 | 0.35 |
| 3  | 7  | 18  | 3.46 | 0.75 |
| -3 | 7  | -18 | 3.13 | 0.64 |
| -3 | -7 | 18  | 2.93 | 0.33 |
| -3 | 7  | -18 | 1.14 | 0.49 |
| 0  | -8 | 18  | 0.66 | 0.27 |
| 0  | 8  | 18  | 0.24 | 0.40 |
| 0  | -8 | -18 | 2.20 | 0.65 |
| 0  | -8 | 18  | 2.02 | 0.51 |
| 0  | 8  | 18  | 1.23 | 0.50 |
| 0  | -8 | 18  | 1.18 | 0.51 |
| 1  | -8 | 18  | 0.47 | 0.29 |
| -1 | 8  | 18  | 0.50 | 0.36 |

## CIF S3

|    |    |     |       |      |
|----|----|-----|-------|------|
| 1  | -8 | 18  | 0.30  | 0.33 |
| 1  | -8 | 18  | 0.00  | 0.23 |
| -1 | 8  | 18  | 0.42  | 0.43 |
| -1 | 8  | 18  | 0.35  | 0.62 |
| -1 | 8  | -18 | 0.12  | 0.54 |
| 1  | -8 | -18 | -0.49 | 0.39 |
| -1 | -8 | 18  | 0.44  | 0.24 |
| -1 | -8 | 18  | -0.05 | 0.26 |
| 1  | 8  | 18  | -0.03 | 0.44 |
| -1 | 8  | -18 | -0.32 | 0.65 |
| 1  | 8  | 18  | 0.02  | 0.47 |
| 0  | 0  | 19  | 0.46  | 0.37 |
| 0  | 0  | 19  | -0.04 | 0.42 |
| 0  | 0  | 19  | -0.19 | 0.42 |
| 0  | 0  | 19  | -0.18 | 0.40 |
| 0  | 0  | 19  | 0.02  | 0.43 |
| 1  | 0  | 19  | 0.47  | 0.43 |
| -1 | 0  | 19  | 0.32  | 0.34 |
| -1 | 0  | 19  | 0.36  | 0.48 |
| -1 | 0  | 19  | 0.47  | 0.39 |
| -1 | 0  | 19  | 0.32  | 0.41 |
| 1  | 0  | 19  | 0.27  | 0.36 |
| 1  | 0  | 19  | 0.65  | 0.46 |
| 1  | 0  | 19  | 0.56  | 0.47 |
| -2 | 0  | 19  | 0.62  | 0.40 |
| -2 | 0  | 19  | -0.14 | 0.28 |
| 2  | 0  | 19  | -0.01 | 0.45 |
| -2 | 0  | 19  | -0.06 | 0.38 |
| 2  | 0  | 19  | 0.92  | 0.50 |
| 2  | 0  | 19  | 0.11  | 0.48 |
| 2  | 0  | 19  | -0.35 | 0.31 |
| 3  | 0  | 19  | 0.44  | 0.42 |
| -3 | 0  | 19  | 0.73  | 0.29 |
| -3 | 0  | 19  | 0.31  | 0.33 |
| -3 | 0  | 19  | 0.87  | 0.24 |
| 3  | 0  | 19  | 0.50  | 0.47 |
| -4 | 0  | -19 | 5.82  | 0.98 |
| 4  | 0  | 19  | 4.66  | 0.67 |
| -4 | 0  | 19  | 5.58  | 0.45 |
| -5 | 0  | -19 | 1.53  | 0.64 |
| 0  | -1 | 19  | 0.34  | 0.42 |

## CIF S3

|    |    |    |       |      |
|----|----|----|-------|------|
| 0  | -1 | 19 | 0.14  | 0.41 |
| 0  | 1  | 19 | 0.31  | 0.37 |
| 0  | 1  | 19 | 0.38  | 0.44 |
| 0  | 1  | 19 | -0.27 | 0.45 |
| 0  | -1 | 19 | 0.57  | 0.41 |
| 0  | 1  | 19 | -0.07 | 0.40 |
| 0  | -1 | 19 | 0.17  | 0.40 |
| 0  | 1  | 19 | -0.08 | 0.42 |
| 0  | -1 | 19 | 0.31  | 0.52 |
| 1  | -1 | 19 | 0.78  | 0.44 |
| 1  | -1 | 19 | 1.85  | 0.45 |
| 1  | -1 | 19 | 0.69  | 0.48 |
| 1  | -1 | 19 | 0.57  | 0.37 |
| -1 | 1  | 19 | 1.14  | 0.43 |
| -1 | 1  | 19 | 1.83  | 0.45 |
| 1  | -1 | 19 | 0.57  | 0.35 |
| -1 | 1  | 19 | 2.09  | 0.54 |
| -1 | 1  | 19 | 1.26  | 0.39 |
| 1  | 1  | 19 | 0.70  | 0.35 |
| 1  | 1  | 19 | 1.91  | 0.50 |
| -1 | -1 | 19 | 1.61  | 0.41 |
| -1 | -1 | 19 | 1.98  | 0.44 |
| -1 | -1 | 19 | 0.83  | 0.50 |
| 1  | 1  | 19 | 1.09  | 0.46 |
| 1  | 1  | 19 | 3.48  | 0.77 |
| 2  | -1 | 19 | 0.66  | 0.47 |
| -2 | 1  | 19 | 0.71  | 0.41 |
| 2  | -1 | 19 | -0.27 | 0.27 |
| 2  | -1 | 19 | 0.12  | 0.48 |
| 2  | -1 | 19 | 0.37  | 0.50 |
| -2 | 1  | 19 | -0.01 | 0.39 |
| 2  | 1  | 19 | 0.64  | 0.48 |
| -2 | -1 | 19 | 0.26  | 0.36 |
| -2 | -1 | 19 | 0.41  | 0.31 |
| 2  | 1  | 19 | 0.30  | 0.44 |
| -2 | -1 | 19 | 1.00  | 0.41 |
| 2  | 1  | 19 | 0.58  | 0.46 |
| -3 | 1  | 19 | 6.84  | 0.73 |
| 3  | -1 | 19 | 5.61  | 0.83 |
| 3  | -1 | 19 | 7.20  | 0.83 |
| -3 | 1  | 19 | 6.49  | 0.65 |

## CIF S3

|    |    |     |       |      |
|----|----|-----|-------|------|
| -3 | 1  | 19  | 6.05  | 0.56 |
| 3  | 1  | 19  | 6.22  | 0.77 |
| -3 | -1 | 19  | 6.27  | 0.61 |
| 3  | 1  | 19  | 5.91  | 0.80 |
| -3 | -1 | 19  | 6.42  | 0.47 |
| -3 | 1  | -19 | 5.14  | 1.37 |
| -3 | -1 | 19  | 6.28  | 0.56 |
| 4  | -1 | 19  | 0.63  | 0.43 |
| -4 | 1  | 19  | -0.06 | 0.23 |
| -4 | -1 | 19  | 0.10  | 0.19 |
| -4 | 1  | -19 | 0.39  | 0.70 |
| -4 | -1 | 19  | 0.29  | 0.19 |
| 4  | 1  | 19  | 0.02  | 0.38 |
| 0  | -2 | 19  | 0.28  | 0.36 |
| 0  | 2  | 19  | 0.12  | 0.40 |
| 0  | 2  | 19  | 0.43  | 0.40 |
| 0  | -2 | 19  | -0.30 | 0.38 |
| 0  | 2  | 19  | 0.38  | 0.57 |
| 0  | 2  | 19  | 0.22  | 0.45 |
| 0  | -2 | 19  | 0.58  | 0.40 |
| 0  | 2  | 19  | -0.13 | 0.45 |
| 0  | 2  | 19  | 1.02  | 0.47 |
| 0  | -2 | 19  | 0.13  | 0.41 |
| -1 | 2  | 19  | 2.14  | 0.57 |
| -1 | 2  | 19  | 1.18  | 0.46 |
| -1 | 2  | 19  | 1.52  | 0.48 |
| 1  | -2 | 19  | 0.60  | 0.39 |
| -1 | 2  | 19  | 0.74  | 0.38 |
| 1  | -2 | 19  | 2.27  | 1.11 |
| 1  | -2 | 19  | 0.99  | 0.44 |
| 1  | -2 | 19  | 0.86  | 0.47 |
| 1  | -2 | 19  | 1.77  | 0.51 |
| -1 | 2  | 19  | 1.05  | 0.46 |
| 1  | 2  | 19  | 0.47  | 0.48 |
| 1  | 2  | 19  | 0.50  | 0.41 |
| 1  | 2  | 19  | 0.70  | 0.46 |
| -1 | -2 | 19  | 1.30  | 0.37 |
| 1  | 2  | 19  | 0.72  | 0.49 |
| -1 | -2 | 19  | 1.43  | 0.40 |
| 2  | -2 | 19  | 4.14  | 0.77 |
| 2  | -2 | 19  | 3.75  | 0.88 |

## CIF S3

|    |    |     |       |      |
|----|----|-----|-------|------|
| -2 | 2  | 19  | 3.60  | 0.68 |
| -2 | 2  | 19  | 4.03  | 0.90 |
| 2  | -2 | 19  | 4.12  | 0.70 |
| 2  | -2 | 19  | 3.52  | 0.85 |
| -2 | 2  | 19  | 3.54  | 0.66 |
| 2  | 2  | 19  | 3.85  | 0.84 |
| -2 | -2 | 19  | 3.54  | 0.54 |
| 2  | 2  | 19  | 4.85  | 0.77 |
| 2  | 2  | 19  | 4.22  | 0.89 |
| -2 | -2 | 19  | 3.44  | 0.62 |
| -2 | -2 | 19  | 3.95  | 0.57 |
| -3 | 2  | 19  | 11.05 | 0.79 |
| -3 | 2  | 19  | 11.77 | 0.85 |
| -3 | 2  | 19  | 12.18 | 0.72 |
| 3  | -2 | 19  | 12.34 | 0.97 |
| 3  | -2 | 19  | 11.91 | 1.04 |
| 3  | 2  | 19  | 11.95 | 0.96 |
| -3 | 2  | -19 | 11.83 | 1.23 |
| -3 | -2 | 19  | 12.38 | 0.79 |
| -3 | -2 | 19  | 12.76 | 0.65 |
| -3 | -2 | 19  | 11.69 | 0.80 |
| -4 | 2  | 19  | 2.08  | 0.43 |
| 4  | -2 | 19  | 2.65  | 0.66 |
| -4 | 2  | 19  | 2.90  | 0.41 |
| -4 | 2  | -19 | 1.49  | 0.65 |
| 4  | 2  | 19  | 3.09  | 0.62 |
| -4 | -2 | 19  | 2.44  | 0.30 |
| -4 | -2 | 19  | 2.99  | 0.31 |
| 0  | 3  | 19  | 0.54  | 0.43 |
| 0  | 3  | 19  | 1.59  | 0.60 |
| 0  | 3  | 19  | 0.44  | 0.46 |
| 0  | -3 | 19  | 0.44  | 0.47 |
| 0  | 3  | 19  | 0.28  | 0.48 |
| 0  | -3 | 19  | 0.91  | 0.41 |
| 0  | 3  | 19  | 1.12  | 0.51 |
| 0  | -3 | 19  | 0.90  | 0.40 |
| 0  | -3 | 19  | 0.65  | 0.38 |
| 0  | 3  | 19  | -0.18 | 0.42 |
| -1 | 3  | 19  | 1.91  | 0.56 |
| -1 | 3  | 19  | 2.09  | 0.47 |
| -1 | 3  | 19  | 1.46  | 0.47 |



## CIF S3

|    |    |     |      |      |
|----|----|-----|------|------|
| -1 | 3  | 19  | 1.79 | 0.52 |
| 1  | -3 | 19  | 2.38 | 0.67 |
| -1 | 3  | 19  | 2.06 | 0.47 |
| 1  | -3 | 19  | 1.98 | 0.52 |
| 1  | -3 | 19  | 1.12 | 0.43 |
| 1  | -3 | 19  | 2.13 | 0.44 |
| 1  | -3 | 19  | 1.99 | 0.97 |
| 1  | 3  | 19  | 1.99 | 0.54 |
| 1  | 3  | 19  | 1.89 | 0.52 |
| -1 | -3 | 19  | 3.03 | 0.66 |
| 1  | 3  | 19  | 0.80 | 0.44 |
| 2  | -3 | 19  | 1.37 | 0.48 |
| 2  | -3 | 19  | 0.15 | 0.28 |
| -2 | 3  | 19  | 1.06 | 0.41 |
| -2 | 3  | 19  | 0.69 | 0.41 |
| -2 | 3  | 19  | 1.35 | 0.35 |
| 2  | -3 | 19  | 1.21 | 0.53 |
| 2  | 3  | 19  | 0.64 | 0.47 |
| -2 | 3  | -19 | 1.99 | 0.74 |
| -2 | -3 | 19  | 1.94 | 0.44 |
| -2 | -3 | 19  | 1.78 | 0.32 |
| 2  | 3  | 19  | 1.06 | 0.51 |
| -2 | -3 | 19  | 0.77 | 0.34 |
| 3  | -3 | 19  | 1.91 | 0.53 |
| 3  | -3 | 19  | 2.45 | 0.68 |
| -3 | -3 | -19 | 2.69 | 0.63 |
| -3 | 3  | 19  | 1.92 | 0.45 |
| -3 | 3  | 19  | 3.15 | 0.48 |
| -3 | 3  | 19  | 3.30 | 0.58 |
| -3 | 3  | -19 | 1.64 | 0.72 |
| -3 | -3 | 19  | 2.24 | 0.44 |
| -3 | -3 | 19  | 3.17 | 0.47 |
| 3  | 3  | 19  | 1.13 | 0.48 |
| -4 | 3  | 19  | 7.35 | 0.54 |
| 4  | -3 | 19  | 6.79 | 0.78 |
| 4  | -3 | 19  | 5.86 | 0.75 |
| -4 | 3  | 19  | 6.84 | 0.56 |
| -4 | -3 | 19  | 7.38 | 0.43 |
| -4 | 3  | -19 | 6.36 | 1.02 |
| 4  | 3  | 19  | 7.08 | 0.74 |
| -4 | -3 | 19  | 7.30 | 0.42 |

## CIF S3

|    |    |     |      |      |
|----|----|-----|------|------|
| -4 | -3 | 19  | 7.36 | 0.40 |
| 0  | -4 | 19  | 4.30 | 0.70 |
| 0  | -4 | 19  | 4.60 | 1.10 |
| 0  | 4  | 19  | 5.28 | 0.75 |
| 0  | 4  | 19  | 3.98 | 0.89 |
| 0  | 4  | 19  | 4.92 | 0.83 |
| 0  | 4  | 19  | 5.20 | 0.80 |
| 0  | -4 | 19  | 4.44 | 0.69 |
| 0  | 4  | 19  | 4.20 | 1.16 |
| 1  | -4 | 19  | 0.63 | 0.32 |
| 1  | -4 | 19  | 1.23 | 0.42 |
| -1 | 4  | 19  | 0.91 | 0.45 |
| -1 | 4  | 19  | 1.40 | 0.48 |
| -1 | 4  | 19  | 0.82 | 0.46 |
| -1 | -4 | -19 | 1.28 | 0.93 |
| 1  | -4 | 19  | 1.17 | 0.47 |
| -1 | 4  | 19  | 0.90 | 0.45 |
| 1  | -4 | 19  | 2.46 | 0.66 |
| -1 | -4 | 19  | 0.45 | 0.35 |
| -1 | 4  | -19 | 0.69 | 0.71 |
| 1  | 4  | 19  | 0.45 | 0.47 |
| 1  | 4  | 19  | 0.39 | 0.51 |
| -1 | -4 | 19  | 0.76 | 0.52 |
| -2 | -4 | -19 | 1.31 | 0.59 |
| 2  | -4 | 19  | 1.74 | 0.52 |
| -2 | 4  | 19  | 1.41 | 0.38 |
| -2 | 4  | 19  | 1.15 | 0.37 |
| -2 | 4  | 19  | 1.54 | 0.41 |
| 2  | -4 | 19  | 2.12 | 0.45 |
| -2 | 4  | -19 | 0.92 | 0.69 |
| 2  | 4  | 19  | 0.78 | 0.49 |
| 2  | 4  | 19  | 1.54 | 0.52 |
| -2 | -4 | 19  | 1.93 | 0.51 |
| -2 | -4 | 19  | 1.63 | 0.43 |
| -3 | 4  | 19  | 6.78 | 0.65 |
| 3  | -4 | 19  | 6.15 | 0.80 |
| -3 | 4  | 19  | 6.51 | 0.53 |
| 3  | -4 | 19  | 7.41 | 0.71 |
| -3 | 4  | 19  | 7.14 | 0.58 |
| -3 | 4  | -19 | 4.75 | 1.07 |
| -3 | -4 | 19  | 7.36 | 0.53 |

## CIF S3

|    |    |     |       |      |
|----|----|-----|-------|------|
| 3  | 4  | 19  | 6.42  | 0.80 |
| 4  | -4 | 19  | 3.45  | 0.56 |
| 4  | -4 | 19  | 3.62  | 0.69 |
| -4 | 4  | 19  | 5.48  | 0.60 |
| -4 | 4  | 19  | 4.24  | 0.53 |
| -4 | 4  | -19 | 5.16  | 0.85 |
| 0  | 5  | -19 | -0.15 | 0.64 |
| 0  | -5 | 19  | 0.22  | 0.31 |
| 0  | 5  | 19  | 0.10  | 0.47 |
| 0  | -5 | 19  | 0.57  | 0.37 |
| 0  | 5  | 19  | 1.06  | 0.48 |
| 0  | -5 | 19  | 0.48  | 0.36 |
| -1 | 5  | 19  | 19.56 | 1.21 |
| 1  | -5 | 19  | 21.06 | 1.22 |
| 1  | -5 | 19  | 23.58 | 1.47 |
| -1 | -5 | -19 | 22.16 | 1.39 |
| 1  | -5 | 19  | 19.83 | 1.16 |
| -1 | 5  | 19  | 22.92 | 1.52 |
| -1 | 5  | 19  | 18.70 | 1.24 |
| -1 | 5  | 19  | 20.37 | 1.25 |
| -1 | 5  | 19  | 19.74 | 1.22 |
| 1  | -5 | 19  | 19.14 | 1.24 |
| -1 | 5  | -19 | 20.28 | 1.44 |
| -1 | -5 | 19  | 19.83 | 1.16 |
| -1 | -5 | 19  | 18.15 | 1.19 |
| 1  | 5  | 19  | 17.45 | 1.32 |
| 1  | 5  | 19  | 20.04 | 1.26 |
| 2  | -5 | 19  | 5.19  | 0.72 |
| -2 | -5 | -19 | 6.48  | 0.74 |
| -2 | 5  | 19  | 6.45  | 0.66 |
| -2 | 5  | 19  | 6.67  | 0.61 |
| 2  | -5 | 19  | 6.66  | 0.67 |
| 2  | -5 | 19  | 5.92  | 0.78 |
| -2 | 5  | 19  | 6.01  | 0.71 |
| 2  | 5  | 19  | 6.74  | 0.75 |
| -2 | -5 | 19  | 7.03  | 0.57 |
| -2 | -5 | 19  | 6.76  | 0.59 |
| 2  | 5  | 19  | 6.01  | 0.80 |
| -2 | -5 | 19  | 6.80  | 0.45 |
| -2 | 5  | -19 | 6.65  | 1.06 |
| 3  | -5 | 19  | 0.37  | 0.40 |

## CIF S3

|    |    |     |       |      |
|----|----|-----|-------|------|
| 3  | 5  | 19  | 0.40  | 0.42 |
| -3 | 5  | -19 | -0.10 | 0.58 |
| 0  | -6 | 19  | 10.84 | 0.79 |
| 0  | 6  | 19  | 11.21 | 0.86 |
| 0  | 6  | -19 | 9.21  | 1.01 |
| 0  | -6 | 19  | 11.22 | 1.07 |
| 0  | 6  | 19  | 11.39 | 0.91 |
| 0  | -6 | -19 | 10.79 | 1.05 |
| -1 | -6 | -19 | 2.69  | 0.69 |
| 1  | -6 | 19  | 1.81  | 0.40 |
| -1 | 6  | 19  | 2.58  | 0.65 |
| -1 | 6  | 19  | 3.63  | 0.62 |
| -1 | 6  | 19  | 2.49  | 0.59 |
| 1  | -6 | 19  | 4.14  | 0.84 |
| -1 | 6  | 19  | 2.62  | 0.55 |
| -1 | -6 | 19  | 2.95  | 0.48 |
| 1  | 6  | 19  | 3.23  | 0.66 |
| 1  | 6  | 19  | 1.57  | 0.45 |
| -1 | 6  | -19 | 3.47  | 0.89 |
| -1 | -6 | 19  | 2.65  | 0.53 |
| 2  | 6  | 19  | 0.79  | 0.44 |
| -2 | 6  | -19 | 0.35  | 0.49 |
| 0  | -7 | 19  | 0.53  | 0.27 |
| 0  | 7  | 19  | 0.36  | 0.36 |
| 0  | -7 | 19  | 0.33  | 0.24 |
| 0  | 7  | -19 | 0.94  | 0.88 |
| 0  | 7  | 19  | 0.20  | 0.39 |
| 0  | -7 | -19 | 0.29  | 0.37 |
| 0  | 0  | 20  | 0.18  | 0.37 |
| 0  | 0  | 20  | 0.54  | 0.38 |
| 0  | 0  | 20  | 2.58  | 1.02 |
| 0  | 0  | 20  | 0.27  | 0.38 |
| 0  | 0  | 20  | -0.19 | 0.45 |
| 1  | 0  | 20  | 0.22  | 0.40 |
| 1  | 0  | 20  | 0.40  | 0.38 |
| 1  | 0  | 20  | 0.60  | 0.41 |
| -1 | 0  | 20  | 0.09  | 0.38 |
| -1 | 0  | 20  | 0.02  | 0.32 |
| 1  | 0  | 20  | 0.06  | 0.29 |
| -1 | 0  | 20  | 0.15  | 0.41 |
| 2  | 0  | 20  | 16.65 | 1.08 |

## CIF S3

|    |    |    |       |      |
|----|----|----|-------|------|
| -2 | 0  | 20 | 16.49 | 0.93 |
| 2  | 0  | 20 | 17.74 | 1.06 |
| -2 | 0  | 20 | 15.71 | 1.01 |
| -2 | 0  | 20 | 16.10 | 0.93 |
| 3  | 0  | 20 | 0.77  | 0.35 |
| -3 | 0  | 20 | 0.20  | 0.21 |
| -3 | 0  | 20 | 0.26  | 0.25 |
| 3  | 0  | 20 | 0.34  | 0.38 |
| 0  | 1  | 20 | 1.90  | 0.54 |
| 0  | 1  | 20 | 1.70  | 0.43 |
| 0  | 1  | 20 | 2.54  | 0.64 |
| 0  | -1 | 20 | 2.52  | 1.01 |
| 0  | -1 | 20 | 1.68  | 0.52 |
| 0  | -1 | 20 | 0.98  | 0.37 |
| 0  | 1  | 20 | 4.40  | 1.24 |
| 0  | 1  | 20 | 0.99  | 0.38 |
| 0  | -1 | 20 | 1.24  | 0.38 |
| 1  | -1 | 20 | 11.26 | 0.90 |
| -1 | 1  | 20 | 12.67 | 0.92 |
| -1 | 1  | 20 | 16.19 | 1.37 |
| 1  | -1 | 20 | 11.98 | 1.08 |
| -1 | 1  | 20 | 12.50 | 0.83 |
| 1  | -1 | 20 | 13.03 | 0.85 |
| 1  | -1 | 20 | 12.78 | 0.90 |
| -1 | 1  | 20 | 12.44 | 0.89 |
| 1  | 1  | 20 | 11.06 | 0.91 |
| 1  | 1  | 20 | 13.62 | 1.08 |
| 1  | 1  | 20 | 8.94  | 1.37 |
| 1  | 1  | 20 | 11.15 | 0.95 |
| -1 | -1 | 20 | 10.89 | 0.88 |
| -1 | -1 | 20 | 12.23 | 0.88 |
| -2 | 1  | 20 | 5.25  | 0.53 |
| -2 | 1  | 20 | 5.67  | 0.64 |
| -2 | 1  | 20 | 5.76  | 0.55 |
| 2  | -1 | 20 | 5.33  | 0.68 |
| 2  | -1 | 20 | 5.86  | 0.65 |
| 2  | 1  | 20 | 5.71  | 0.67 |
| -2 | -1 | 20 | 5.27  | 0.48 |
| -2 | -1 | 20 | 5.11  | 0.61 |
| -2 | -1 | 20 | 5.18  | 0.49 |
| 2  | 1  | 20 | 5.34  | 0.76 |

## CIF S3

|    |    |     |      |      |
|----|----|-----|------|------|
| -3 | 1  | 20  | 5.59 | 0.33 |
| -3 | 1  | 20  | 6.49 | 0.52 |
| 3  | -1 | 20  | 4.83 | 0.63 |
| -3 | -1 | -20 | 4.24 | 0.65 |
| 3  | -1 | 20  | 5.64 | 0.62 |
| -3 | 1  | 20  | 6.18 | 0.48 |
| -3 | -1 | 20  | 6.46 | 0.48 |
| -3 | -1 | 20  | 5.40 | 0.45 |
| 3  | 1  | 20  | 5.11 | 0.63 |
| 3  | 1  | 20  | 4.73 | 0.70 |
| 0  | 2  | 20  | 2.27 | 0.54 |
| 0  | 2  | 20  | 1.04 | 0.43 |
| 0  | 2  | 20  | 1.94 | 0.56 |
| 0  | -2 | 20  | 2.37 | 0.58 |
| 0  | 2  | 20  | 1.33 | 0.41 |
| 0  | -2 | 20  | 3.27 | 1.00 |
| 0  | -2 | 20  | 2.00 | 0.40 |
| 1  | -2 | 20  | 0.86 | 0.30 |
| -1 | 2  | 20  | 2.55 | 0.62 |
| 1  | -2 | 20  | 0.52 | 0.33 |
| -1 | 2  | 20  | 0.60 | 0.38 |
| 1  | -2 | 20  | 1.60 | 0.36 |
| -1 | 2  | 20  | 0.60 | 0.37 |
| 1  | -2 | 20  | 1.14 | 0.38 |
| -1 | -2 | 20  | 0.76 | 0.35 |
| -1 | -2 | 20  | 0.19 | 0.51 |
| 1  | 2  | 20  | 0.47 | 0.42 |
| 1  | 2  | 20  | 0.96 | 0.43 |
| -1 | -2 | 20  | 0.43 | 0.36 |
| -2 | 2  | 20  | 0.64 | 0.28 |
| -2 | 2  | 20  | 0.90 | 0.35 |
| -2 | 2  | 20  | 0.81 | 0.31 |
| 2  | -2 | 20  | 0.37 | 0.37 |
| 2  | -2 | 20  | 0.76 | 0.38 |
| 2  | 2  | 20  | 1.73 | 0.44 |
| -2 | -2 | 20  | 0.51 | 0.21 |
| -2 | -2 | 20  | 0.87 | 0.31 |
| 2  | 2  | 20  | 0.59 | 0.40 |
| -3 | 2  | 20  | 2.63 | 0.30 |
| -3 | 2  | 20  | 2.38 | 0.48 |
| 3  | -2 | 20  | 1.22 | 0.36 |

## CIF S3

|    |    |     |       |      |
|----|----|-----|-------|------|
| -3 | 2  | 20  | 2.80  | 0.43 |
| 3  | -2 | 20  | 2.49  | 0.41 |
| -3 | 2  | -20 | 0.83  | 0.85 |
| -3 | -2 | 20  | 2.64  | 0.35 |
| 3  | 2  | 20  | 0.47  | 0.37 |
| 3  | 2  | 20  | 1.86  | 0.41 |
| 0  | -3 | 20  | 0.50  | 0.31 |
| 0  | -3 | 20  | 0.34  | 0.33 |
| 0  | -3 | 20  | 0.36  | 0.30 |
| 0  | 3  | 20  | 0.21  | 0.48 |
| 0  | 3  | 20  | 0.07  | 0.39 |
| 0  | 3  | 20  | -0.17 | 0.41 |
| 0  | 3  | 20  | 0.48  | 0.40 |
| -1 | 3  | 20  | 0.25  | 0.38 |
| -1 | 3  | 20  | -0.50 | 0.31 |
| 1  | -3 | 20  | -0.20 | 0.36 |
| -1 | 3  | 20  | -0.22 | 0.35 |
| 1  | -3 | 20  | 0.21  | 0.30 |
| 1  | -3 | 20  | 0.24  | 0.26 |
| 1  | -3 | 20  | 0.68  | 0.33 |
| -1 | -3 | 20  | 0.32  | 0.29 |
| 1  | 3  | 20  | 0.59  | 0.42 |
| -1 | -3 | 20  | 0.10  | 0.31 |
| 1  | 3  | 20  | 0.43  | 0.39 |
| -2 | 3  | 20  | 0.04  | 0.33 |
| -2 | 3  | 20  | 0.21  | 0.28 |
| -2 | 3  | 20  | 0.25  | 0.28 |
| -2 | -3 | -20 | 0.13  | 0.49 |
| 2  | -3 | 20  | 0.04  | 0.38 |
| 2  | -3 | 20  | -0.01 | 0.36 |
| -2 | 3  | -20 | 0.71  | 0.81 |
| -2 | -3 | 20  | 0.12  | 0.27 |
| -2 | -3 | 20  | 0.34  | 0.34 |
| 2  | 3  | 20  | 0.53  | 0.41 |
| -2 | -3 | 20  | 0.51  | 0.18 |
| 2  | 3  | 20  | -0.10 | 0.38 |
| -3 | 3  | 20  | 2.99  | 0.33 |
| 3  | -3 | 20  | 2.74  | 0.56 |
| -3 | 3  | 20  | 2.95  | 0.38 |
| 3  | -3 | 20  | 2.67  | 0.57 |
| 3  | 3  | 20  | 2.90  | 0.58 |

## CIF S3

|    |    |     |       |      |
|----|----|-----|-------|------|
| -3 | 3  | -20 | 5.20  | 1.30 |
| -3 | -3 | 20  | 3.71  | 0.33 |
| 0  | -4 | 20  | 5.16  | 0.59 |
| 0  | -4 | 20  | 5.66  | 0.92 |
| 0  | 4  | 20  | 4.11  | 0.68 |
| 0  | 4  | 20  | 4.35  | 0.64 |
| 0  | 4  | 20  | 3.21  | 0.65 |
| 0  | 4  | 20  | 4.53  | 0.59 |
| 0  | -4 | 20  | 4.61  | 0.57 |
| 1  | -4 | 20  | 10.71 | 0.77 |
| -1 | 4  | 20  | 9.68  | 0.78 |
| -1 | 4  | 20  | 8.16  | 0.79 |
| 1  | -4 | 20  | 10.61 | 0.93 |
| 1  | -4 | 20  | 11.96 | 0.76 |
| -1 | 4  | 20  | 10.50 | 0.72 |
| 1  | -4 | 20  | 10.33 | 0.75 |
| -1 | -4 | -20 | 8.93  | 0.93 |
| 1  | 4  | 20  | 9.74  | 0.80 |
| -1 | -4 | 20  | 10.17 | 0.73 |
| 1  | 4  | 20  | 9.03  | 0.82 |
| -1 | -4 | 20  | 9.00  | 0.64 |
| -2 | 4  | 20  | 9.51  | 0.69 |
| 2  | -4 | 20  | 8.18  | 0.65 |
| -2 | -4 | -20 | 7.36  | 0.64 |
| 2  | -4 | 20  | 8.87  | 0.72 |
| -2 | 4  | 20  | 8.22  | 0.60 |
| 2  | 4  | 20  | 9.69  | 0.76 |
| -2 | -4 | 20  | 8.58  | 0.61 |
| -2 | 4  | -20 | 7.56  | 1.04 |
| -2 | -4 | 20  | 8.77  | 0.58 |
| 2  | 4  | 20  | 7.31  | 0.74 |
| 0  | 5  | 20  | -0.01 | 0.49 |
| 0  | -5 | 20  | 2.22  | 0.76 |
| 0  | -5 | -20 | 0.50  | 0.49 |
| 0  | -5 | 20  | 1.80  | 0.48 |
| 0  | 5  | 20  | 0.47  | 0.38 |
| 0  | 5  | 20  | 0.88  | 0.34 |
| -1 | 5  | 20  | 4.27  | 0.58 |
| -1 | -5 | -20 | 4.18  | 0.60 |
| 1  | -5 | 20  | 3.40  | 0.53 |
| 1  | -5 | 20  | 4.96  | 0.56 |



## CIF S3

|    |    |    |       |      |
|----|----|----|-------|------|
| -1 | 5  | 20 | 4.43  | 0.53 |
| 1  | -5 | 20 | 4.94  | 0.68 |
| -1 | 5  | 20 | 4.86  | 0.72 |
| 1  | 5  | 20 | 5.08  | 0.63 |
| -1 | -5 | 20 | 4.40  | 0.45 |
| 1  | 5  | 20 | 4.53  | 0.66 |
| -1 | -5 | 20 | 5.08  | 0.42 |
| 0  | 0  | 21 | -0.08 | 0.28 |
| 0  | 0  | 21 | 0.40  | 0.36 |
| 0  | 0  | 21 | 0.48  | 0.31 |
| 1  | 0  | 21 | 2.67  | 0.67 |
| -1 | 0  | 21 | 1.91  | 0.40 |
| 1  | 0  | 21 | 2.26  | 0.60 |
| -1 | 0  | 21 | 2.24  | 0.43 |
| 1  | 0  | 21 | 2.38  | 0.91 |
| -1 | 0  | 21 | 1.10  | 0.30 |
| 1  | 0  | 21 | 1.85  | 0.44 |
| 1  | 0  | 21 | 1.61  | 0.33 |
| 0  | 1  | 21 | 3.85  | 0.50 |
| 0  | -1 | 21 | 4.01  | 0.56 |
| 0  | 1  | 21 | 4.33  | 0.57 |
| 0  | -1 | 21 | 4.00  | 0.57 |
| 0  | 1  | 21 | 4.07  | 0.62 |
| 0  | -1 | 21 | 3.61  | 0.60 |
| 1  | -1 | 21 | 1.07  | 0.39 |
| 1  | -1 | 21 | 2.77  | 0.94 |
| 1  | -1 | 21 | 0.67  | 0.41 |
| 1  | -1 | 21 | 0.26  | 0.30 |
| -1 | 1  | 21 | 0.26  | 0.28 |
| -1 | 1  | 21 | 0.30  | 0.28 |
| 1  | -1 | 21 | 0.38  | 0.37 |
| -1 | -1 | 21 | 0.74  | 0.22 |
| 1  | 1  | 21 | 1.15  | 0.32 |
| -1 | -1 | 21 | 2.73  | 0.82 |
| -1 | -1 | 21 | 0.81  | 0.26 |
| -1 | -1 | 21 | 0.48  | 0.28 |
| 1  | 1  | 21 | 1.48  | 0.45 |
| 1  | 1  | 21 | 0.23  | 0.38 |
| 0  | -2 | 21 | 3.41  | 0.76 |
| 0  | 2  | 21 | 0.98  | 0.42 |
| 0  | 2  | 21 | 2.75  | 0.53 |

CIF S3

|    |    |     |      |      |
|----|----|-----|------|------|
| -1 | 2  | 21  | 1.80 | 0.43 |
| 1  | -2 | 21  | 2.20 | 0.57 |
| -1 | -2 | -21 | 2.88 | 0.70 |
| 1  | -2 | 21  | 3.07 | 0.59 |
| -1 | 2  | 21  | 2.44 | 0.50 |
| 1  | 2  | 21  | 1.98 | 0.56 |
| 1  | 2  | 21  | 2.24 | 0.43 |
| -1 | -2 | 21  | 2.09 | 0.47 |
| -1 | -2 | 21  | 2.19 | 0.37 |
| -1 | -2 | 21  | 4.88 | 1.33 |
| 0  | 0  | 0   | 0.00 | 0.00 |

;

\_shelx\_hkl\_checksum 36553
